# Supplementary material for: A time-resolved multi-omic atlas of the developing mouse liver
Source: HighWire-hosted journal article supplement (doi:10.1101/gr.253328.119), 2020-02-01
Supplement: Supplemental_methods.docx [file Supplemental_methods.docx]

**Supplementary Methods**

**Animals and tissue collection**

Eight weeks old C57BL/6 mice were purchased from Beijing HFK Bioscience Co., LTD (Beijing, China). Mice were administrated under a standard housing environment (a specific pathogen-free, temperature-controlled micro-environment with a 12-hour day/night cycle). Embryonic and infant livers were not sexed. Livers from male mice were collected from postnatal W1 to W8 when sex determination was possible. Mice were euthanized by cervical dislocation. Livers were resected, removed, and collected at 15 time points spanning the major developmental stages: 1) the embryonic period (E12.5, E13.5, E14.5, E15.5, E16.5, E17.5, E18.5); and 2) the postnatal period (Postnatal Days: D1, D3, D5; Postnatal Weeks: W1, W2, W3, W6, W8). Livers were flash frozen in liquid nitrogen and then stored at -80°C prior to protein and RNA extractions. This study has ethical and scientific approval in compliance with the animal care regulations of the State Key Laboratory of Proteomics, Beijing Proteome Research Center, Institute of Lifeomics.

**Protein Extraction, TFRE pulldowns, Trypsinization, and LC-MS/MS Analysis**

Liver tissues were washed with ice-cold phosphate-buffered saline (PBS) twice, minced with a tissue grinder, and subjected to protein extraction in lysis buffer (8M Urea, 100mM Tris Hydrochloride, pH=8.0) supplemented with protease and phosphatase inhibitors (Thermo Scientific) for 15 min followed by 1 min sonication on ice (a 3s on/off cycle with 25% amplitude). Lysates were centrifuged at 16,000g for 10 min at 4℃ and supernatants with whole protein extracts were collected. Protein concentration was determined by Bradford protein assay. About 100 µg of protein samples was reduced with 10 mM dithiothreitol (DTT) at 56°C for 30 min and alkylated with 10 mM iodoacetamide (IAA) at room temperature in the dark for additional 30 min. Tryptic peptides were fractionated with small scale C18 reversed phase (sRP) chromatography (Ding et al. 2013b; Jung et al. 2017) into 9 fractions by using stepwise increase of acetonitrile (6%, 9%, 12%, 15%, 18%, 21%, 25%, 30%, and 35%) at pH=10. The nine fractions were combined to six aliquots, and then vacuum dried in a SpeedVac concentrator (Thermo Scientific).

For TFRE pulldowns, nuclear extracts of liver tissues were incubated with a biotinylated DNA fragment containing a concatenated tandem array of 100 selected consensus TFREs (catTFRE) for the majority of TF families. Proteins on the Dynabeads were digested with trypsin in 50mM ammonium bicarbonate at 37 °C for 6 h. Peptide mixtures were dissolved in 0.1% formic acid before they were subjected to LC-MS/MS analysis.

Dried peptide samples were re-dissolved in 0.1% formic acid and resolved on a home-made silica column (column size: 150 µm × 12 cm; particle size: 1.9 µm; pore size, 120 Å; SunChrom, USA) connected to an UltiMate 3000 RSLCnano System (Thermo Fisher Scientific) operating a 75 min linear gradient (5-35% acetonitrile in 0.1% formic acid) at a flow rate of 600 nl/min. Tandem mass spectra were acquired by a QExactive HF mass spectrometer (Thermo Fisher Scientific, Rockford, IL, USA) under a data-dependent mode: one full scan in 300-1400 m/z at resolution of 60,000 followed by up to 20 MS2 scans with higher-energy collision dissociation with normalized collision energy of 27% at resolution of 15,000. Quality control samples were made from trypsin digests of 293T cells and were routinely analyzed to assess the LC-MS/MS sensitivity and reproducibility.

**High-throughput RNA Sequencing and Data Analysis**

RNA sequencing (RNA-seq) experiments were performed by Illumina HiSeq 4000 based on Illumina comprehensive next-generation sequencing (NGS) technique. Briefly, the total RNA was extracted and treated with DNase I. Once mRNA was isolated by magnetic beads with Oligo (dT), it was fragmented into short pieces followed by cDNA synthesis using the mRNA fragments as templates. Short fragments were purified, extended with single nucleotide adenines, ligated with adapters, and finally amplified by PCR prior to sequencing.

RNA-seq reads were adapter trimmed and those reads shorter than 50 nt (nucleotide) or with a Phred quality score below 20 were removed. The quality control and data filtering were processed by the FastQC software (Version 0.11.5, Available online at: <http://www.bioinformatics.babraham.ac.uk/projects/fastqc>). The processed reads were mapped onto the mouse reference genome (GRCm38.p2.genome, available on 12/10/2013) by using the HISAT2 software (Version 2.1.0) (Kim et al. 2015). Transcripts were assembled and quantified by using the StringTie software (Version 1.3.1) with a reference genome annotation file (gencode.vM2.annotation downloaded from the homepage of GENCODE website) (Pertea et al. 2015). Relative quantification of transcripts was measured as Fragments Per Kilobase of transcript per Million mapped reads (FPKM)

**Bioinformatics and Statistical Analysis**

The criterion for determination of the number of clusters is based on the scree plot for the k-means clustering analysis. As the number of clusters increases, the variance (within-group sum of squares) decreases. We are looking for the elbow of the plot which represents the balance between minimizing the number of clusters and minimizing the variance within each cluster (Supplemental Fig. S2A-B).
