# Supplementary material for: A time-resolved multi-omic atlas of the developing mouse liver
Source: HighWire-hosted journal article supplement (doi:10.1101/gr.253328.119), 2020-02-01
Supplement: Supplemental_Table_S1.xlsx [file Supplemental_Table_S1.xlsx]

## Sheet: Sheet1
Gene.ID	GeneSymbol	E12.5.1.Exp018736	E12.5.2.Exp018737	E12.5.3.Exp018738	E13.5.1.Exp018739	E13.5.2.Exp018740	E13.5.3.Exp018741	E14.5.1.Exp018742	E14.5.2.Exp018743	E14.5.3.Exp018744	E15.5.1.Exp018745	E15.5.2.Exp018746	E15.5.3.Exp018747	E16.5.1.Exp018748	E16.5.2.Exp018749	E16.5.3.Exp018750	E17.5.1.Exp018751	E17.5.2.Exp018752	E17.5.3.Exp018753	E18.5.1.Exp018754	E18.5.2.Exp018755	E18.5.3.Exp018756	D1.1.Exp018757	D1.2.Exp018758	D1.3.Exp018759	D3.1.Exp018760	D3.2.Exp018761	D3.3.Exp018762	D5.1.Exp018763	D5.2.Exp018764	D5.3.Exp018765	W1.1.Exp018766	W1.2.Exp018767	W1.3.Exp018768	W2.1.Exp018769	W2.2.Exp018770	W2.3.Exp018771	W3.1.Exp018772	W3.2.Exp018773	W3.3.Exp018774	W6.1.Exp018775	W6.2.Exp018776	W6.3.Exp018777	W8.1.Exp018778	W8.2.Exp018779	W8.3.Exp018780
66050	0610009B22Rik	0.14	0.1	0.01	0.01	0.05	0.13	0	0.03	0.05	0.06	0.06	0.07	0.06	0.04	0.13	0.03	0.04	0.02	0.08	0.01	0.01	0	0	0.05	0.16	0.13	0	0	0.07	0.04	0	0.06	0.01	0.14	0.06	0.04	0.02	0.2	0.07	0	0.19	0.04	0.05	0.11	0.06
104457	0610010K14Rik	0.44	1.14	3.36	1.81	0.38	1.06	0.36	0.37	0.48	0.12	0.08	0.35	0.05	0.37	0.06	0.1	0.17	0.16	0.12	0	1.03	0.11	0	0.3	0	0.16	0.07	0.84	0.09	0.07	0.14	1.91	0.13	0.02	0.36	0	0	0.04	0.11	0	0	0	0	0.03	0
68364	0610030E20Rik	0.01	0	0	0	0.06	0	0.01	0.01	0.01	0.01	0.01	0.04	0.06	0	0	0.01	0.01	0.01	0	0	0.01	0	0	0.03	0	0	0.07	0	0	0.01	0	0	0.03	0	0	0	0	0	0	0	0	0	0.25	0	0.01
76261	0610040J01Rik	0	0	0	0	0	0	0	0	0	0	0	0	0	0	0	0	0	0	0.08	0	0	0	0	0.87	0.01	0.01	0	0	0	0.01	0.07	1.56	0	0.11	0	0	0	0	0.04	0	0.01	0.01	0	0	0
56372	1110004F10Rik	0.63	0.32	0.8	0.38	0.77	0.69	0.45	0.52	0.5	0.34	0.24	0.25	0.18	0.28	0.19	0.21	0.27	0.25	0.17	0.22	0.18	0.29	0.56	0.26	0.47	0.38	0.26	0.28	0.15	0.31	0.25	0.67	0.37	0.3	0.03	0.03	0.18	0.29	0	0.05	0.09	0.07	0.15	0.11	0.11
73737	1110008P14Rik	0	0	0	0	0.17	0	0	0	0	0	0	0	0	0	0	0	0	0	0	0	0	0	0	0	0	0	0	0	0	0	0	0	0	0	0	0	0	0	0	0	0	0	0	0	0
68618	1110012L19Rik	0.16	0	0	0	0	0	0	0	0	0.01	0	0	0.02	0	0	0	0	0	0	0	0	0	0	0	0	0	0	0	0	0	0	0	0	0	0	0	0	0	0	0	0	0	0	0	0
73721	1110017D15Rik	0	0	0	0	0	0	0	0	0	0	0	0	0	0	0	0	0	0.06	0	0	0	0	0	0.27	0	0	0	0	0	0	0	0	0	0	0	0	0	0	0	0	0	0	0	0	0
117171	1110038F14Rik	0.09	0.14	0.12	0.06	0.32	0.2	0.06	0.02	0.02	0	0.02	0.02	0	0.02	0.08	0	0	0	0	0.02	0	0	0.04	0	0	0	0.04	0	0.01	0	0	0	0	0	0	0	0	0	0	0	0	0	0	0	0
66202	1110059G10Rik	0	0.04	0	0	0	0.06	0	0	0	0	0	0	0.02	0.01	0	0	0	0	0	0	0	0	0	0.05	0	0	0	0	0	0	0.02	0	0	0	0	0	0	0	0	0	0	0	0	0	0
67467	1200011I18Rik	0.14	0.06	0.07	0.03	0.02	0.08	0.05	0.02	0	0.61	0.02	0.05	0.04	0	0	0.72	0	0.05	0.04	0	0	0	0	0	0	0	0.02	0	0	0	0	0.05	0	0	0	0	0	0	0	0.01	0	0	0	0	0
71775	1300017J02Rik	0.02	0.01	0.01	0.02	0.02	0.02	0.04	0.08	0.06	0.03	0.04	0.18	0.03	0.05	0.23	0.64	0.08	0.29	0.36	0.35	0.35	0.08	0.16	0.35	0.31	0.26	0.29	0.42	0.4	1.4	1.07	1.92	0.34	1.86	0.58	1.65	0.56	0.96	1.78	0.67	0.51	0.45	1.32	0.46	0.58
72244	1600014C10Rik	0.15	0.07	0	0.03	0.15	0.1	0.3	0.76	0.43	1.02	0.52	0.61	0.05	0.06	0.83	0.33	0.29	0.96	2.26	2.05	1.93	1.09	1.08	0.27	3.53	1.35	3.49	3.59	7.69	6.82	6.01	3.94	14.22	6.22	17.68	18.06	2.75	4.83	6.73	2.4	1.67	4.04	4.12	4.5	5.72
75471	1700009N14Rik	13.18	25.16	14.62	16.4	7.66	13.7	5.14	7.7	5.75	15.8	5.58	7.83	9.33	10.28	7.23	14.1	6	6.05	8.09	17.87	7.1	6.7	8.29	4.08	18.57	11.8	3.61	13.2	7.35	5.84	5.05	7.23	4.87	3.47	5.82	5.59	2.84	3.39	4.24	4.16	3.61	3.21	2.05	1.93	1.7
74211	1700017B05Rik	0	0	0	0	0	0	0	0.04	0	0	0	0	0	0	0	0	0	0	0	0	0	0	0	0	0	0	0	0	0	0	0	0	0	0	0	0	0	0	0	0	0	0	0	0	0
69396	1700018F24Rik	0	0	0	0	0	0	0	0	0	0	0	0	0	0	0	0	0	0	0	0.03	0	0	0	0	0	0	0	0	0	0	0	0	0	0	0	0	0	0	0	0	0	0	0	0.09	0
67080	1700019D03Rik	0	0	0	0	0	0	0	0	0	0	0	0	0	0	0	0.03	0.03	0	0	0	0	0	0.06	0	0	0.92	0.08	0	0	0	0	0	0	0	0	0	0	0	0	0	0	0	0	0	0
75555	1700020D05Rik	0	0	0	0	0	0	0.01	0	0.01	0	0	0.01	0	0	0.01	0	0	0.01	0	0	0	0	0	0	0	0	0	0	0	0	0	0	0.01	0	0	0.01	0	0.01	0	0	0	0	0	0	0
67851	1700021F05Rik	0	0.25	0.23	0.1	0	0	0.16	0	0	0	0.04	0.04	0	0	0	0	0	0	0.07	0.04	0.22	0.05	0.05	0.02	0	0	0.01	0.16	0	0.12	0	0	0.02	0	0	0	0	0	0	0.37	0.15	0	0.05	0.05	0
69441	1700023F06Rik	0	0	0	0	0	0	0	0	0	0	0	0	0	0	0	0	0	0	0	0	0	0	0	0	0	0	0.03	0	0	0	0	0	0	0	0	0	0	0	0	0	0	0	0	0	0
67483	1700028P14Rik	0	0	0	0	0.01	0.01	0	0	0	0	0	0	0	0	0	0	0	0	0	0	0	0	0	0	0	0	0	0	0	0	0	0	0	0	0	0	0	0	0	0	0	0	0	0	0
73324	1700034F02Rik	0	0	0	0	0	0	0	0	0	0.03	0	0	0	0	0	0	0	0	0	0	0.01	0	0	0	0	0	0	0	0	0	0	0	0	0	0	0	0	0	0	0	0	0	0	0	0
67326	1700037H04Rik	0.82	0.72	1.14	0.39	0.53	1.37	1.12	0.95	0.95	0.69	0.69	1.27	1.21	0.82	0.31	0.55	0.44	0.52	0.8	0.13	0.33	0.19	0.11	0.09	0.12	0.09	0	0.16	0.06	0.05	0	0	0.02	0	0	0	0.02	0	0	0	0	0	0	0	0
100101807	1700047I17Rik2	0.02	0.03	0.2	0.01	0.04	0.06	0.02	0	0.01	0	0.01	0.01	0.01	0.03	0	0.01	0.01	0.01	0	0.02	0	0	0.02	0	0.02	0.02	0	0.03	0	0.01	0.02	0	0	0.03	0	0	0.01	0	0	0	0	0.01	0	0	0
73467	1700066M21Rik	0	0	0	0	0	0	0	0	0	0	0	0	0	0	0	0	0	0	0	0	0	0	0	0	0	0	0	0	0	0	0	0.01	0.01	0	0	0	0	0	0	0	0	0.27	0.02	0.01	0.01
237880	1700071K01Rik	4.59	3.72	6.45	3.33	3.34	3.72	4.16	3.83	3.59	3.11	3.39	4.29	4.2	3.4	3.02	3.2	4.99	10.28	7.05	5.05	2.28	8.76	12.09	6.04	19.96	16.88	15.45	15.65	11.38	13.06	39.22	19.03	14.92	32.1	25.3	19.54	25.6	16.24	12.92	17.51	16.65	15.27	10.64	8.56	9.28
73481	1700074P13Rik	0	0.15	0.13	0.17	0.03	0.05	0	0.03	0.1	0	0.09	0.01	0	0.07	0	0.02	0.05	0	0.06	0.15	0	0	0.29	0	0	0	0	0	0.13	0.15	0	0	0.1	0.2	0.11	0.1	0	0	0.09	0	0.57	0.07	0.07	0.12	0.1
74279	1700080O16Rik	0	0	0	0	0	0	0	0	0	0	0	0	0	0	0	0	0	0	0	0	0	0	0	0	0	0	0.2	0	0	0	0	0	0	0	0	0	0	0	0	0	0	0	0	0	0
27660	1700088E04Rik	0	0	0	0	0	0	0	0	0	0	0	0	0	0	0	0	0.08	0	0	0	0	0	0	0	0	0	0	0	0	0	0	0	0	0	0	0	0	0	0	0	0	0	0	0	0
58248	1700123O20Rik	0.01	0	0	0	0	0	0	0	0	0	0	0	0	0	0	0	0	0	0	0	0	0	0	0	0	0	0	0	0	0	0	0	0	0	0	0	0	0	0	0	0	0	0	0	0
66276	1810009A15Rik	1.02	2.8	0.03	2.37	3.22	2.44	1.04	0.87	1.16	0.13	1.07	0.97	0.46	1.12	0.46	0	0.05	0.54	0	0.93	0.99	0	0.65	0.24	0.23	0	1.01	0.21	0.21	0.6	0.11	0.18	0.18	0.1	0.4	0	0.08	0	0.14	0	0.52	0.09	0.13	0.15	0
73626	1810009J06Rik	5.24	7.19	3.75	3.47	4.25	11.06	2.74	2.35	5.91	1.05	2.08	2.26	0.24	0.72	6.81	0.18	4.27	2.62	1.08	1.51	0.96	4.85	12.46	6.69	5.71	2.52	2.14	8.17	10.19	2.68	11.56	15.76	12.1	10.3	2.96	6.17	4.83	5.95	6.72	7.34	9.17	1.04	12.14	15.78	4.7
69099	1810009N02Rik	0.01	0.03	0.12	0.02	0.06	0.05	0.02	0.06	0.09	0.02	0.05	0.05	0.01	0.06	0.03	0.01	0.02	0.27	0.09	0.11	0.06	0.06	0.06	0.12	0	0.11	0.09	0.06	0.25	0.46	0.05	0.1	0.27	0	0.94	0.47	0.14	0.18	0.26	0.07	0.45	0.56	0.17	0.34	0.25
69155	1810030O07Rik	0	0.01	0	0.01	0.02	0.36	0.03	0	0	0	0.03	0.01	0	0.01	0	0	0	0	0	0	0	0	0	0	0	0	0	0	0	0	0	0	0	0	0	0	0	0	0	0	0	0	0	0	0
67704	1810037I17Rik	0.17	0.33	0.25	0.15	0.28	0.27	0.21	0	0.07	0.18	0.14	0.18	0.13	0.18	0	0.28	0.06	0.11	0.2	0.22	0.22	0.09	0.27	0	0	0	0.05	0.3	0	0.18	0	0	0.32	0	0	0.17	0	0	0.25	0	0	0	0.13	0.1	0.16
72282	1810062G17Rik	0	0	0	0	0	0	0	0	0	0	0	0	0	0	0	0	0	0	0	0	0	0	0	0	0	0	0	0	0	0	0	0	0	0	0	0	0	0	0	0	0	0	0.05	0	0
67715	2010106E10Rik	0	0	0	0	0	0	0	0	0	0	0	0	0	0	0.29	0	0	0	0	0	0	0	0	0	0	0	0	0	0	0	0	0	0	0	0	0	0	0	0	0	0	0	0	0	0
72275	2200002D01Rik	0	0	0	0	0	0	0.02	0	0	0.03	0	0.04	0.02	0	0.1	0.02	0.06	0.09	0.05	0	0.04	0	0.12	0.08	0	0	0.1	0	0	0	0	0	0	0	0	0	0	0.07	0	0.06	0.14	0.1	0.32	0.8	0.4
67373	2210010C04Rik	15.56	32.93	28.07	23.02	30.42	84.94	24.93	39.08	32.96	15.01	26.8	44.02	1.7	20.93	190.65	42.51	71.34	180.49	19.87	80.19	78.44	30.72	124.4	10.13	27.31	65.62	32.03	43.06	65.4	38.42	69.86	105.04	36.93	27.86	75.91	35.07	31.85	40.74	54.99	37.83	30.92	39.99	67.48	57.98	36.64
70153	2210016F16Rik	0.63	0.28	0.65	0.46	0.5	0.67	0.52	0.51	0.59	0.56	0.47	0.48	0.67	0.24	0.62	0.42	0.46	1.16	0.58	0.61	0.79	0.21	0.48	0.73	0.7	1.14	0.83	1.53	0.55	1.26	1.74	1.83	1.34	1.65	1.62	2.13	1.21	1.7	1.28	1.04	0.72	0.46	1	0.65	0.67
72357	2210016L21Rik	0.11	0.08	0.16	0.11	0.13	0.09	0.07	0	0	0	0.04	0.02	0.04	0.02	0.02	0.03	0	0.02	0	0	0.05	0	0	0.02	0	0.11	0.02	0	0	0	0	0	0.02	0	0	0	0	0	0	0	0	0	0	0	0
381062	2210404J11Rik	0.01	0	0	0	0	0	0	0	0	0	0	0	10.91	0	7.87	0	10.22	0	7.66	0	0	0	0	0	0	0	0	0	0	0	0	0	0	0	0	0	0	0	13.03	0	0	12.95	0	0	3.17
69542	2300002M23Rik	0	0	0	0	0	0	0	0	0	0	0	0	0	0	0	0	0	0	0	0	0	0	0	0	0	0	0	0	0	0	0	0	0	0	0	0	0	0	0.09	0	0	0	0	0	0
71886	2310002L09Rik	0	0	0	0	0	0	0	0	0	0	0	0	0	0	0	0	0	0	0	0	0	0	0	0	0	0	0	0	0	0	0	0	0	0	0	0	0	0	0	0	0	0	0	0	2.1
69549	2310009B15Rik	0	0	0	0	0	0	0	0	0.02	0	0	0	0	0	0	0	0	0	0	0	0	0	0	0	0	0	0.01	0	0.07	0	0	0	0	0	0.13	0	0	0	0	0	0	0	0	0	0
66374	2310011J03Rik	0.07	0.08	0.08	0.15	0.08	0.25	0.28	0.02	0.08	0.08	0.02	0.09	0.07	0.23	0.06	0.01	0.01	0.02	0.01	0.02	0.03	0	0	0.05	0.04	0.03	0.08	0	0	0	0.04	0	0.17	0	0	0	0	0.02	0.05	0.05	0	0	0.02	0	0
66367	2310022A10Rik	0.03	0.01	0.03	0.05	0	0.01	0	0	0	0	0.01	0	0	0.01	0	0	0	0	0	0	0	0	0	0	0	0	0	0	0	0	0	0	0	0	0	0	0	0	0	0	0	0	0	0	0
69551	2310022B05Rik	0.01	0	0.12	0	0.1	0.03	0.01	0.07	0.06	0	0.01	0.02	0	0	0	0	0.01	0.02	0.02	0	0	0	0	0.03	0	0	0.01	0.03	0	0	0.01	0.01	0.16	0	0	0	0.03	0	0.07	0.02	0	0	0	0.07	0.09
67862	2310033P09Rik	0.09	0.17	0.28	0.35	0.32	0.29	0.02	0.26	0.03	0.06	0.06	0.25	0.17	0.02	0.06	0.18	0.03	0	0.02	0.33	0.21	0	0	0.02	0	0.02	0.02	0	0	0	0.01	0.03	0.01	0	0	0	0.02	0	0	0	0	0	0	0	0
67101	2310039H08Rik	0.17	0	0	0	0.05	0	0.23	0	0.11	0	0.18	0.05	0.15	0	0.04	0.03	0.26	0.69	0.24	0.43	0.19	0.2	1.31	1.76	1.5	1.85	1.53	0.36	0.13	0.4	1.56	1.69	0.99	0.77	0.13	0.04	0.44	0.27	0	0.14	0.68	0	0.38	0.27	0.33
68277	2310057M21Rik	0.06	0.01	0.01	0	0.01	0.01	0.01	0	0	0	0.01	0.01	0	0	0	0	0	0	0	0	0	0	0	0	0	0	0	0	0	0	0	0	0	0	0	0	0	0	0	0	0	0	0	0	0
69662	2310061I04Rik	0.01	0	0	0	0	0	0	0	0.01	0.01	0.01	0	0.01	0	0.01	0.01	0.01	0	0	0.01	0	0	0	0	0.07	0.01	0.04	0.08	0.11	0.05	0.14	0.01	0.06	0.13	0.29	0.39	0.04	0.12	0.04	0.09	0.07	0.08	0.15	0.11	0.17
668661	2410002F23Rik	0.01	0.01	0.02	0	0.01	0.01	0.01	0.01	0.01	0.01	0	0.01	0	0	0.01	0	0	0.01	0.01	0	0.01	0.01	0.1	0.01	0.01	0.02	0.05	0.02	0	0.01	0.02	0.02	0.02	0.01	0	0	0	0	0	0	0	0	0	0	0
66421	2410004B18Rik	0.03	0.04	0	0	0.02	0	0	0	0.04	0	0.05	0	0.08	0.05	0	0	0	0	0	0	0	0	0	0	0	0	0	0	0	0	0	0	0	0	0	0	0	0	0	0	0	0	0	0	0
72307	2510002D24Rik	0	0	0	0	0.02	0.06	0	0	0	0	0	0	0	0	0.09	0	0	0	0	0	0	0	0	0	0	0	0	0	0	0	0	0	0	0	0	0	0	0	0	0	0	0	0	0	0
77034	2510039O18Rik	0	0.06	0	0.01	0	0	0.02	0.02	0.03	0	0.09	0	0.01	0	0	0.05	0.01	0	0.01	0	0	0.01	0.03	0	0.03	0	0	0	0.01	0	0	0	0	0.02	0	0	0.03	0	0	0	0	0.01	0	0	0
67028	2610002M06Rik	0.28	0.22	0.2	0.45	0.2	0.54	0.07	0.23	0.26	0	0.3	0.4	0.24	0.19	0.62	0.14	0.19	0.44	0	0.27	0.16	0	0.17	0.14	0	0.53	0.19	0.27	0.42	0.48	0	0.27	1.8	0.18	0.17	0.71	0.2	0.34	0.29	0	0.06	0	0.25	0.22	0.23
67157	2610301B20Rik	0.02	0.03	0.36	0.17	0.19	0.33	0.02	0	0.04	0.02	0.15	0.22	0.04	0.18	0.08	0.01	0	0.24	0.01	0	0	0	0	0.01	0	0	0.01	0	0.09	0	0	0	0	0	0	0	0	0	0.18	0	0	0	0.01	0	0
219158	2610301G19Rik	0.29	0.28	0.5	0.23	0.49	0.24	0.21	0.46	0.5	0.25	0.18	0.82	0.2	0.19	0.21	0.23	0.17	0.36	0.21	0.2	0.15	0.18	0.3	0.15	0.46	0.58	0.4	0.24	0.29	0.12	0.47	0.43	0.44	0.63	0.39	0.5	0.22	0.19	0.49	0.05	0.08	0.13	0.36	0.09	0.12
72503	2610507B11Rik	0	0	0	0	0	0	0	0	0	0	0	0	0	0	0	0	0	0	0	0	0	0	0	0	0	0	0.03	0	0	0	0	0	0	0	0	0	0	0	0	0	0	0	0	0	0
330173	2610524H06Rik	0.04	0	0	0	0	0	0	0	0	0	0	0	0	0	0	0	0	0	0	0	0	0	0	0	0	0	0	0	0	0	0	0	0	0	0	0	0	0	0	0	0	0	0	0	0
68046	2700062C07Rik	0.02	0.02	0.01	0	0	0	0.01	0	0	0	0	0	0	0.01	0	0	0	0	0	0	0	0	0	0	0	0	0.01	0	0	0	0	0	0	0	0	0	0	0	0	0	0	0	0	0	0
72658	2700097O09Rik	0.05	0.15	0.29	0.03	0.06	0	0.01	0.06	0.01	0.02	0.04	0.02	0.03	0.14	0.35	0.05	0.01	0.02	0	0.01	0.02	0.32	0	0.01	0	0.01	0.02	0.02	0	0.02	0	0	0	0	0	0	0	0	0	0	0	0	0	0	0
66523	2810004N23Rik	0.08	0.22	0.76	0.11	0.05	0.05	0.01	0	0.01	0.01	0.01	0.01	0	0.12	0	0	0	0	0	0	0	0	0	0	0	0	0	0	0	0	0	0	0	0	0	0	0	0	0	0	0	0	0	0	0
72650	2810006K23Rik	0	0	0	0	0.05	0.05	0	0.01	0	0	0	0	0	0	0	0	0	0.06	0	0	0	0	0	0.01	0	0	0.01	0	0	0	0	0	0	0.01	0	0	0	0	0	0	0.03	0	0	0	0
70419	2810408A11Rik	0.01	0.03	0.03	0	0	0.01	0	0	0.01	0	0	0	0	0	0.03	0	0.04	0.03	0.02	0	0.01	0	0	0.02	0	0	0.01	0	0	0.01	0	0	0.01	0	0.01	0	0	0	0.01	0	0	0.01	0	0.01	0.02
72792	2810459M11Rik	0.06	0.04	0	0.15	0.12	0.1	0.13	0.28	0.23	0.16	0.28	0.37	0.24	0.2	0.64	0.22	0.37	0.87	0.1	0.34	0.46	0.3	0.63	0.46	0.99	0.9	0.94	0.61	0.63	1	0.98	0.97	1.18	1.64	0.61	0.8	0.4	0.67	0.48	0.49	0.32	0.06	0.45	0.48	0.5
243219	2900026A02Rik	0	0	0	0	0	0	0	0	0	0	0	0	0	0	0.02	0	0	0	0	0	0	0	0	0	0	0	0.02	0.05	0	0	0	0	0.02	0	0.05	0.01	0	0.07	0.12	0	0	0.04	0.01	0.11	0.14
70680	3021401N23Rik	0	0	0	0	0	0	0	0	0	0	0	0	0	0	0	0	0	0	0	0	0	0	1.17	0	0	0	0	0	0	0	0	0	0	0	0	0	2.42	0	0	0	0.45	0	0	0	0
73103	3110009E18Rik	0.02	0	0.01	0	0.03	0.79	1.23	0.06	0.04	0	0	0.06	1.33	0.02	0	0	0	0.09	0	0.01	0.08	0	0	0	0.02	0	0	0	0	0	0	0	0	0	0	0	0	0	0	0	0	0	0	0	0
67290	3110040N11Rik	0	1.95	0.29	0	0.06	0	0	0	0.18	0	2.03	0	1.92	0.23	0	0	0	0	0.53	4.72	0	0	0	0	0	0	0	7.71	0	0	0	0.23	0.61	0	0	0	0	0	0.05	0	0	0	0	0	0
73212	3110082I17Rik	0.03	0.13	0.25	0.04	0.14	0.13	0	0.07	0.01	0.01	0.01	0.02	0	0.07	0	0	0	0	0	0	0	0	0	0.02	0.01	0	0.01	0	0	0	0	0	0	0	0	0	0	0	0	0	0	0	0	0	0
218734	3830406C13Rik	0	0	0	0	0	0	0	0	0	0	0	0	0	0	0	0	0	0	0	0	0	0	0	0	0	0	0	0	0	0	0	0	0	0	0	0	0	0	0	0	0.08	0	0	0	0
381218	4430402I18Rik	0	0	0	0	0	0	0	0	0	0	0	0	0	0	0	0	0	0	0	0	0	0	0	0	0	0	0	0	0	0	0	0	0	0	0	0.55	0	0	0	0	0	0	0	0	0
97820	4833439L19Rik	0.15	0.22	0	0	0	0.02	0	0.01	0	0	0	0	0	0	0	0.05	0.05	0	0	0	0	0	0.02	0	0.02	0.01	0	0	0	0	0.01	0.01	0.01	0	0	0	0	0	0	0	0	0	0.01	0.01	0.01
70821	4921507P07Rik	0	0	0	0	0	0	0	0	0	0	0	0	0	0	0	0	0	0	0	0	0	0	0	0	0	0	0	0	0	0	0	0	0	0	0	0	0	0	0	0	0	0	0.06	0	0
70900	4921517D22Rik	0	0	0	0	0	0	0	0.07	0	0	0	0	0	0	0	0	0	0	0	0	0	0	0	0	0	0	0	0	0	0	0	0	0	0	0	0	0	0	0	0	0	0	0	0	0
228602	4930402H24Rik	0	0	0	0	0	0	0	0	0	0	0	0	0	0	0	0	0	0	0	0	0	0	0	0	0	0	0	0	0	0	0	0	0.01	0	0	0	0	0	0	0	0	0	0	0	0.01
68281	4930430F08Rik	0.03	0.07	0.09	0.02	0.03	0.06	0.08	0.06	0.05	0.01	0	0.01	0.03	0.02	0	0.01	0.01	0	0	0	0	0.01	0	0	0	0	0	0.02	0	0	0	0	0	0	0	0	0	0	0	0	0	0	0	0	0
243944	4930433I11Rik	0	0	0	0	0	0	0	0	0	0	0	0	0	0	0	0	0	0	0	0	0	0	0	0	0	0	0	0	0	0	0	0.01	0.02	0	0	0	0	0	0	0	0	0	0	0	0
67609	4930453N24Rik	0	0	0.02	0	0	0.01	0	0	0	0	0	0	0	0	0	0	0	0	0	0	0	0	0	0	0	0	0	0	0	0	0	0	0	0	0	0	0	0	0	0	0	0	0	0	0
380654	4930485B16Rik	0	0	0	0	0	0	0	0	0	0	0	0	0	0	0	0	0	0	0	0	0	0	0	0	0	0	0	0	0	0	0	0	0	0	0	0	0	0	0	0.01	0	0	0	0	0
74954	4930503E14Rik	0	0	0	0	0	0	0	0	0	0	0	0	0	0	0	0	0	0	0	0	0	0	0	0	0	0	0	0	0	0	0	0	0	0	0	0	0	0	0.74	0	0	0	0	0	0
269033	4930503L19Rik	0	0	0	0	0	0	0	0	0	0	0	0	0	0	0	0	0	0	0	0	0	0	0	0.02	0	0	0	0	0	0	0	0	0	0	0	0	0	0	0	0	0	0	0	0	0
67593	4930519G04Rik	0	0.03	0	0	0	0	0	0	0	0	0	0	0	0	0	0	0	0	0	0	0	0	0	0	0	0	0	0	0	0	0	0	0	0	0	0	0	0	0	0	0	0	0	0	0
75827	4930542N06Rik	0	0	0	0	0	0	0	0	0	0	0	0	0	0	0	0	0	0	0	0	0	0	0	0	0	0	0	0	0	0	0	0	0	0	0	0	0	0	0	0.04	0	0	0	0	0
668433	4930544D05Rik	0	0	0	0.04	0	0	0	0	0	0	0	0	0	0	0	0	0	0	0	0	0	0	0	0	0	0	0	0	0	0	0	0	0	0	0	0	0	0	0	0	0	0	0	0	0
67653	4930544G11Rik	1.27	3.63	0.71	0.79	1.1	1.03	1.69	1.43	0.99	1.49	1.63	0.89	0.9	0.86	0.78	1.5	1.92	1.31	4.99	2.49	0.94	2.04	5.36	1.66	6.04	3.01	1.15	6.87	7.13	3.62	4.73	6.75	5.31	2.31	3.71	3.89	2.03	3.34	3.59	2.05	3.7	1.51	1.04	2.84	1.84
78809	4930562C15Rik	0	0	0.02	0.01	0.02	0	0	0	0	0	0	0	0	0	0	0	0	0	0	0	0	0	0	0	0	0	0	0	0	0	0	0	0	0	0	0	0	0	0	0	0	0	0	0	0
70984	4931406C07Rik	0.18	0.13	0.13	0.16	0.1	0.29	0.23	0.56	0.3	0.32	0.39	0.53	0.58	0.22	0.59	0.64	0.44	1.2	1.05	0.98	0.64	1.47	3.12	2.8	6.7	7.41	5.27	8.87	7.37	9.4	16.34	13.5	12.05	17.16	19.47	17.96	15.18	21.1	20.97	14.74	16.48	17.76	12.77	12.84	13.72
233103	4931406P16Rik	0	0	0	0	0	0.01	0	0	0	0	0	0	0	0	0	0	0	0	0	0	0	0	0	0	0	0	0	0	0	0	0	0	0	0	0	0	0	0	0	0	0	0	0	0	0
216622	4931440F15Rik	0	0.01	0	0	0	0	0	0	0	0	0	0	0	0	0	0	0	0	0	0	0	0	0	0	0	0	0	0	0	0	0	0	0	0	0	0	0	0	0	0	0	0	0	0	0
245509	4932429P05Rik	0	0	0	0	0.05	0	0	0	0	0	0	0	0	0	0	0	0	0	0	0	0	0	0	0	0	0	0	0	0	0	0	0	0	0	0	0	0	0	0	0	0	0	0	0	0
66761	4933417A18Rik	0	0	0	0	0	0	0	0	0	0	0	0	0	0	0.02	0	0	0	0	0	0.02	0	0	0	0	0	0	0.12	0	0.04	0	0	0	0	0	0	0	0.13	0	0	0	0	0	0	0
223739	5031439G07Rik	0	0	0	0	0	0	0.07	0	0	0	0	0	0	0	0	0	0	0	0	0	0	0	0	0	0.75	0	0	0	0	0	0	0	0	0	0	0	0	1.49	0	0	0	0	0	0	0.59
229722	5330417C22Rik	0	0	0.05	0	0	0	0	0	0	0	0	0.06	0	0	0	0	0	0.09	0	0	0.04	0	0	0	0	0	0.03	0	0	0	0	0	0	0	0	0	0	0	0	0	0	0	0	0	0
230757	5730409E04Rik	0	0	0	0	0	0	0	0	0	0	0	0	0	0	0	0	0	0	0.1	0	0	0	0	0	0.24	0	0	0	0	0	0	0	0	0	0	0	0	0	0	0	0	0	0.07	0	0
70591	5730455P16Rik	0.01	0	0.01	0.01	0.01	0.01	0.98	0.01	0.02	0.01	0	0.03	0	0	0.02	0.01	0	0.04	0	0	0.02	0	0	0.02	0.04	0	0.05	0.01	0	0.03	0.01	0	0.06	0.01	0.04	0.1	0	0.06	0.05	0.01	0.06	0	0.01	0.04	0.05
77877	6030458C11Rik	0.04	0	0.34	0	0	0.09	0	0	0.05	0.01	0	0	0.01	0	0	0	0	0.01	0	0	0	0	0	0.04	0	0	0.02	0	0	0	0	0	0	0	0	0	0	0	0	0	0	0	0	0	0
77727	6030468B19Rik	0.12	0.04	0.05	0	0	0.03	0.02	0	0.02	0.1	0.1	0.32	0	0.07	0.03	0	0	0	0	0	0	0	0	0	0	0	0	0	0	0	0	0	0	0	0	0	0	0	0	0	0	0	0	0	0
234797	6430548M08Rik	0	0	0	0	0	0	0	0	0.03	0	0	0	0	0	0	0	0	0.01	0	0	0	0	0.01	0	0.04	0.01	0.02	0	0	0	0.02	0	0.02	0.03	0	0.02	0	0	0	0	0	0	0	0	0
212163	8030462N17Rik	0.05	0.05	0.02	0	0	0.02	0.01	0	0	0.04	0	0	0	0	0	0	0	0	0	0	0	0	0	0	0	0	0	0	0	0	0	0	0	0	0	0	0	0	0	0	0	0	0	0	0
232210	8430410A17Rik	0.01	0	0.08	0.01	0.01	0.01	0.01	0.01	0.04	0	0	0.01	0.02	0.01	0	0	0	0	0	0	0	0	0	0	0	0	0	0	0	0	0	0	0	0	0	0	0	0	0	0	0	0	0	0	0
619326	9130409I23Rik	0	0	0.21	0	0	0.82	0	0	0	0	0	0	0	0	0	0	0	0	0	0.16	0	0	0	0	0	0	0	0	0	0	0	0.62	0	0	0	0	0	0	0	0	0	0	0	0	0
212448	9330159F19Rik	0	0	0	0	0	0	0	0	0	0	0.06	0	0	0	0	0	0	0	0	0	0	0	0	0	0	0	0	0	0	0	0	0	0	0	0	0	0	0	0	0	0	0	0	0	0
231014	9330182L06Rik	0	0	0	0	0	0	0	0	0	0	0	0	0	0	0	0	0	0	0	0	0	0	0	0	0	0	0	0	0	0	0	0.01	0	0	0	0	0	0	0	0.07	0	0	0	0	0
77252	9430038I01Rik	0.06	0	0	0	0	0	0	0	0	0	0	0	0	0	0	0	0	0	0	0	0	0	0	0	0	0	0	0	0	0	0	0	0	0	0	0	0	0	0	0	0	0	0	0	0
319482	9530053A07Rik	0.08	0.21	0.06	0.14	0.02	0.1	0.05	0.04	0.02	0.07	0.07	0.14	0.08	0	0.06	0.01	0.12	0.05	0.34	0.32	0.02	0.12	0.19	0.1	0	0.15	0.04	0.06	0.64	0.04	0.15	0.14	0.03	0.1	0	0	0	0	0	0	0.29	0.08	0.05	0.12	0.02
213673	9530068E07Rik	0.02	0.25	0.24	0.01	0	0.17	0	0	0	0.05	0	0	0.19	0.03	0.32	0.03	0.07	0	0.39	0.39	0.01	0.11	0.2	0.04	0.06	0	0.04	0.19	0.88	0	0	0.13	0.15	0.12	0.3	0	0.38	0	0.08	0.74	0	0.11	0	0.02	0
320706	9830001H06Rik	0	0	0.01	0	0.01	0	0	0	0.12	0	0	0	0	0	0	0	0	0	0	0	0	0	0	0	0	0	0	0	0	0	0	0	0	0.02	0	0	0	0	0	0	0	0	0	0	0
194268	9930104L06Rik	0.01	0	0	0	0	0.01	0	0	0	0	0	0	0	0	0	0	0	0	0	0	0	0	0	0	0	0	0	0	0	0	0	0	0	0	0	0	0	0	0	0	0	0	0	0	0
667214	9930111J21Rik1	0	0	0	0	0	0	0	0	0	0	0	0	0	0	0	0	0	0.02	0.02	0.02	0.01	0.01	0.02	0.01	0.04	0.05	0.05	0.1	0.04	0.28	0.06	0.21	0.12	0.04	0.03	0.01	0.01	0.02	0.01	0	0	0.01	0.01	0	0
117586	A1bg	0	0	0	0	0	0	0	0	0	0	0	0	0	0	0	0	0	0	0	0	0	0	0	0	0	0	0	0	0	0	0	0	0	0	0	0	0	0	0	0	0.03	0.33	0	0	0
69865	A1cf	0.11	0.03	0.41	0.07	0.12	0.07	0.19	0.38	0.27	0.08	0.26	0.28	0.11	0.13	0.51	0.26	0.26	1.73	0.97	1.47	0.78	0.95	1.31	0.74	3.16	1.33	1.11	2.04	1.82	1.17	1.57	1.21	1.26	1.97	1.04	2.18	2.73	3.34	2.49	3.39	1.45	1.97	2.43	2.45	2.75
232345	A2m	0.01	0.03	0	0.12	0.03	0.03	0.12	0.46	0.15	0.18	0.15	0.21	0.12	0.07	1.22	0.44	0.41	3.73	1.54	1.62	2.58	1.49	0.79	0.64	0.26	0.21	0.12	0.06	0.11	0.25	0.06	0.14	0.1	0.08	0.02	0.09	0.05	0.07	0.08	0.09	0.04	0.03	0.07	0.08	0.09
232400	A2ml1	0	0	0	0	0.05	0	0	0	0	0	0	0	0	0	0	0	0	0.02	0	0	0	0	0	0	0	0	0.04	0	0	0	0	0	0	0	0	0	0	0	0	0	0	0	0	0	0
97159	A430005L14Rik	0.11	0.14	0.28	0.03	0.07	0.14	0.08	0.16	0	0.05	0.04	0.41	0	0	0	0	0.07	0.24	0	0	0.16	0.08	0.04	0.06	0	0.05	0.07	0.13	0.04	0.06	0.06	0.04	0.04	0	0.06	0.16	0.09	0.05	0.05	0.02	0.22	0.05	0.04	0	0
381287	A530032D15Rik	0	0	0	0	0	0	0	0	0	0	0	0	0	0	0	0	0	0	0	0.02	0	0	0	0	0	0	0	0	0	0	0	0	0	0	0	0	0	0	0	0	0	0	0	0	0
328830	A530064D06Rik	0	0	0	0	0	0	0	0	0.02	0	0	0	0	0	0	0	0	0	0	0	0	0	0	0	0	0	0	0	0	0	0	0	0	0	0	0	0	0	0	0	0	0	0	0	0
319997	A630001G21Rik	0	0	0	0	0	0	0	0	0	0	0	0	0	0	0	0	0	0	0.01	0	0	0	0	0	0	0	0	0	0	0	0	0	0	0	0	0	0	0	0	0	0	0	0	0	0
212427	A730008H23Rik	0.01	0.04	0.02	0.01	0	0	0	0	0	0	0	0	0.05	0.01	0	0	0	0	0	0	0	0	0	0	0	0	0	0	0	0	0	0	0	0	0	0	0	0	0	0	0	0	0	0	0
320492	A830018L16Rik	0	0	0	0	0	0	0	0	0.01	0	0	0	0	0	0	0	0	0	0	0	0	0	0	0	0	0	0	0	0.29	0	0	0	0	0	0	0	0	0	0	0	0.21	0.63	0.18	0	0
245350	AA414768	0.01	0.02	0	0	0.01	0.02	0.01	0.01	0.01	0	0	0.01	0	0	0.01	0	0	0	0	0	0.02	0	0	0.01	0	0	0	0	0	0	0	0.02	0	0	0	0.01	0	0.01	0	0	0	0	0	0	0
544808	AA623943	0	0	0	0	0	0	0	0	0	0	0	0	0.46	0	0	0	0	0	0	0	0	0	0	0	0	0	0	0	0	0	0	0	0	0	0	0	0	0	0	0	0	0	0	0	0
100554	AA792892	0	0.02	0	0.01	0.01	0.01	0	0	0	0	0	0	0	0	0	0	0	0	0	0	0	0	0	0	0	0	0	0	0	0	0	0	0	0	0	0	0	0.01	0	0	0	0	0	0	0
212439	AA986860	0	0	0.01	0	0.01	0.01	0	0	0	0	0	0	0	0	0	0	0	0	0	0	0	0	0	0	0	0	0	0	0	0	0	0	0	0	0	0	0	0	0	0	0	0	0	0	0
223921	Aaas	0.22	0.16	0.12	0.2	0.13	0.18	0.12	0.08	0.12	0.1	0.22	0.22	0.24	0.25	0.13	0.1	0.07	0.08	0.08	0.03	0.21	0.07	0.1	0.13	0.23	0.05	0.12	0.5	0	0.1	0.41	0.01	0.05	0.33	0.12	0	0.5	0.03	0	0	0	0	0.07	0.02	0.09
78894	Aacs	0.33	0.16	0.15	0.33	0.15	0.25	0.22	0.18	0.36	0.19	0.3	0.23	0.32	0.23	0.31	0.35	0.34	0.54	0.65	0.84	0.42	0.22	0.54	0.06	0.07	0.02	0.05	0.08	0.1	0.01	0	0.01	0.03	0	0	0	1.1	2.12	1.78	0.98	2.24	2.31	2.9	2.23	2.34
67758	Aadac	0.59	1.4	1.99	2.54	2.18	0.98	4.27	8.38	6.23	5.14	5.88	6.31	6.93	5.34	15.04	12.96	10.31	20.62	20.91	22.87	13.68	22.34	22.94	15.66	36.65	37.75	35.34	46.11	35.57	50.25	47	53.15	49.38	71.27	55.89	65.57	43.95	55.23	59.53	65.61	38.55	26.4	39.78	39.54	41.64
23923	Aadat	0.01	0	0	0	0.01	0.01	0.04	0.09	0.17	0.09	0.08	0.02	0.03	0.02	0.13	0.07	0.04	0.44	0.24	0.18	0.19	0.51	0.8	0.59	2.29	1.58	1.44	3.25	3.57	2.84	6.7	4.32	4.97	7.42	10.02	6.43	6.16	5.62	5.43	1.91	4.92	3.53	4.98	3.4	4.91
66939	Aagab	0.01	0.01	0.02	0.04	0.02	0.04	0.01	0	0	0.01	0.01	0.01	0.01	0.03	0.01	0.01	0.01	0	0.01	0.01	0	0.01	0	0	0.01	0	0.01	0.04	0.02	0.01	0	0.03	0.02	0	0	0	0.01	0.01	0.01	0.01	0.01	0	0.01	0	0
269774	Aak1	0.07	0.06	0.23	0.09	0.09	0.07	0.02	0.11	0.1	0.08	0.03	0.07	0.08	0.03	0.16	0.02	0.04	0.26	0.08	0.02	0.12	0.01	0.03	0.05	0.04	0.1	0.05	0.12	0.08	0.04	0.01	0.01	0.04	0.01	0.02	0	0.02	0	0.03	0.01	0.06	0.01	0.01	0.02	0.05
66273	Aamdc	0	0	0.18	0	0	0	0	0	0.01	0	0	0.24	0	0.21	0.04	0	0	0.01	0	0	0	0	0	0.04	0	0.02	0.03	0	1.42	0.28	0	0	0.02	0.01	0.15	0.32	0	0.02	0	0	0.01	0.17	0.01	0.01	0.17
227290	Aamp	0.88	1.23	0.84	1.12	0.96	1.5	0.41	0.3	0.2	0.74	0.83	0.8	1	0.29	0.38	0.33	0.22	0.31	0.25	0.31	0.32	0.45	0.38	0.38	0.64	0.25	0.42	0.43	0.25	0.61	0.43	0.72	0.31	0.18	0.11	0.06	0.3	0.05	0.36	0.17	0	0.03	0.03	0.02	0.04
68295	Aar2	0.06	0.02	0.12	0.16	0.17	0.09	0.05	0	0	0.04	0.01	0.13	0.01	0	0	0.06	0	0.01	0	0	0	0	0.02	0	0	0	0	0.02	0	0	0	0	0	0	0	0	0	0	0	0	0	0	0	0	0
239435	Aard	0	0	0	0	0	0	0	0	0	0	0	0	0	0	0	0	0	0	0	0	0	0	0	0	0	0	0	0	0.01	0	0	0	0	0	0	0	0	0	0	0	0	0	0	0	0
234734	Aars	2.29	1.74	4.28	2.55	2.8	3.25	2.26	2.04	2.49	1.65	1.78	2.92	2.11	1.74	1.83	1.43	1.5	2.67	1.76	1.72	2.02	1.58	3.1	1.78	3.35	3.6	2.31	2.53	3.18	3.47	3.55	4.25	3.34	4.44	2.74	4.31	3.83	5.2	4.88	4.18	4.65	2.73	3.31	4.1	3.03
224805	Aars2	0.08	0.06	0.05	0.03	0.03	0.02	0.04	0.01	0.01	0.02	0.01	0.01	0.03	0.03	0.17	0.02	0.01	0.23	0.01	0.05	0.01	0.01	0.06	0	0.05	0.06	0.22	0.08	0.07	0.02	0.05	0.04	0.15	0.11	0.14	0.06	0.17	0.08	0.04	0.05	0.01	0.01	0.04	0.24	0.02
69684	Aarsd1	0.68	0.24	0.79	0.65	0.48	0.73	0.27	0.45	0.74	0.23	0.41	0.2	0.46	0.27	0.1	0.18	0.2	0.22	0.35	0.14	0.2	0.28	0.27	0.72	0.76	0.49	0.51	0.44	0.57	0.85	0.58	0.79	0.91	0.68	0.74	0.42	0.61	0.61	0.48	0.07	0.96	0.23	0.56	0.72	0.52
231326	Aasdh	0	0	0	0	0	0	0	0	0	0	0	0	0	0	0	0	0	0	0	0	0	0	0	0.02	0	0	0	0	0	0	0	0	0	0.13	0	0	0	0	0	0	0	0	0	0	0
67618	Aasdhppt	0.08	0.07	0.21	0.14	0.22	0.09	0.06	0.06	0.1	0.05	0.08	0.08	0.05	0.03	0.07	0.05	0.04	0.01	0.03	0.03	0.02	0.02	0.04	0.06	0.1	0.06	0.06	0.14	0.03	0.05	0.05	0.01	0.05	0.25	0	0	0.06	0.31	0.08	0	0.06	0.03	0.35	0.09	0.08
30956	Aass	0.16	0.35	0.12	0.36	0.42	0.31	0.96	0.9	0.78	0.64	0.95	0.93	0.58	0.94	1.28	0.89	1.3	2.66	2.96	3.06	1.71	4.78	8.44	4.45	18.25	10.85	6.67	5.14	9.69	7.86	19.71	12.06	4.71	21.94	21.34	5.12	16.36	10.1	8.77	15.35	20.71	12.45	10.76	12.2	18.8
56321	Aatf	0.21	0.14	0.17	0.18	0.26	0.52	0.12	0.07	0.23	0.13	0.04	0.11	0.07	0.07	0.01	0	0.03	0.07	0.03	0.22	0	0.02	0	0.02	0.04	0	0.05	0	0.01	0	0	0.01	0	0.01	0	0.01	0	0	0	0.02	0	0	0.05	0	0
382062	AB124611	0	0	0	0	0	0	0	0	0.03	0	0	0	0	0	0	0	0	0	0	0	0	0	0	0	0	0	0	0	0	0.02	0	0	0	0	0	0	0	0	0	0	0	0	0	0	0
268860	Abat	2.19	1.91	0.16	0.11	0.15	0.2	0.54	0.61	0.87	0.77	0.93	1.14	1.22	1.64	3.14	1.79	2.64	7.15	5.79	15.17	2.26	8.44	2.8	26.73	77.73	22.61	2.9	1.99	41.25	8.1	14.4	9.28	4.43	50.29	27.52	50.57	8.74	75.79	45.64	66.95	33.8	28.35	13.48	73.83	59.62
11303	Abca1	0.01	0.33	0.05	0.06	0.07	0.04	0.08	0.1	0.03	0.04	0.08	0.13	0.18	0.37	0.08	0.06	0.08	0.49	0.08	0.22	0.15	0.03	0.11	0.04	0.3	0.12	0.1	0.21	0.31	0.14	0.58	1.04	0.45	0.14	0.15	0.09	0.63	0.02	0.03	0.12	0.3	0.01	0.03	0.02	0.02
268379	Abca13	0	0	0	0	0	0	0	0	0	0	0	0	0	0	0	0	0	0	0	0	0	0	0	0	0	0	0	0	0	0	0	0	0	0.01	0	0	0	0	0	0	0	0	0	0	0
381072	Abca17	0.03	0	0.07	0	0	0	0	0	0.03	0.01	0.01	0.02	0.05	0.01	0	0	0.02	0.02	0.05	0.06	0	0	0.05	0.07	0	0	0.02	0	0	0.03	0.1	0.08	0.06	0	0	0	0	0.04	0.04	0.02	0	0	0.04	0.05	0.06
27410	Abca3	0	0	0.03	0	0.02	0.02	0.01	0.02	0.02	0.01	0.01	0.01	0.01	0.01	0.03	0	0	0	0.01	0	0	0	0	0	0	0	0	0	0	0	0	0.32	0.01	0	0	0	0	0	0	0	0	0	0	0	0
217265	Abca5	0	0	0	0	0	0	0	0	0	0	0	0	0	0	0	0.01	0	0	0	0	0	0	0	0	0.03	0	0.01	0	0	0	0	0	0	0	0	0	0.03	0	0	0	0.01	0	0	0	0
76184	Abca6	0	0	0	0	0	0	0	0.02	0.01	0.02	0.01	0.01	0.01	0	0.04	0.06	0.02	0.07	0.2	0.12	0.08	0.22	0.31	0.59	1.21	1	0.39	0.4	0.34	0.27	2.1	0.43	0.78	0.57	0.53	0.87	0.54	0.43	0.49	0.5	0.5	0.7	1.37	1.21	0.7
217258	Abca8a	0	0	0	0	0	0	0	0	0	0	0	0	0	0	0	0	0	0	0	0	0	0	0.01	0	0	0	0.01	0	0	0.01	0.02	0	0	0.01	0.03	0	0.01	0	0	0	0	0	0.04	0	0
27404	Abca8b	0	0	0	0	0	0	0	0.04	0	0	0	0.03	0	0	0.01	0	0.02	0.1	0.06	0.09	0.12	0.1	0.12	0.12	0.2	0.14	0.2	0.14	0.26	0.08	0.14	0.27	0.19	0.29	0.18	0.35	0.1	0.13	0.04	0.06	0.09	0.02	0.03	0.04	0.32
217262	Abca9	0	0	0	0	0	0	0	0	0	0	0	0	0	0	0	0	0	0.02	0	0.01	0	0.01	0.02	0.02	0	0.02	0.05	0.02	0.02	0.02	0.08	0.05	0.02	0.04	0.06	0.02	0.04	0.14	0.02	0.03	0.07	0.03	0.06	0.02	0.08
56199	Abcb10	0.73	0.83	1.15	0.84	0.81	1.26	1.17	1.1	0.97	0.61	0.92	0.48	1.09	1.06	0.43	0.74	0.51	0.25	0.21	0.37	0.41	0.16	0.4	0.16	0.19	0.33	0.63	1.58	0.14	0.31	0.18	0.08	0.14	0.2	0.02	0.02	0.02	0.02	0.03	0.25	0.06	0.05	0.21	0.28	0.11
27413	Abcb11	0	0	0	0	0	0	0	0.15	0.18	0	0.01	0.05	0.01	0.02	0.04	0.01	0.04	0.62	0.67	0.99	0.28	1.15	1.7	1.35	2.28	2.94	2.94	3.36	2.37	2.57	3.76	4.44	3.75	3.04	2.2	3.46	4.4	3.58	3.52	2.64	3.99	2.72	2.58	4.61	3.29
18671	Abcb1a	0	0	0	0	0	0	0	0	0	0.01	0	0.01	0	0	0	0	0	0	0.02	0.03	0	0.01	0.03	0.13	0.03	0.15	0.04	0.03	0.04	0.05	1.2	0.24	0.09	0.05	0.01	0.1	0.03	0.07	0.07	0.01	0.05	0.01	0.02	0.03	0.06
18669	Abcb1b	0	0	0.06	0	0.17	0	0	0	0	0.01	0	0.01	0	0	0.21	0	0	0.02	0.02	0.03	0	0.02	0.02	0.02	0.03	0.08	0.04	0.03	0.04	0.05	0.08	0.09	0.07	0.05	0.01	0.08	0.03	0.07	0.07	0.01	0.06	0.01	0.02	0.03	0.06
18670	Abcb4	0	0	0	0	0.04	0.03	0.02	0.01	0.02	0.01	0	0.07	0.01	0.01	0.24	0.01	0.01	0.04	0.06	0.19	0.08	0.11	0.33	0.25	0.43	0.48	0.53	0.78	0.47	0.59	0.85	3.86	0.65	0.61	0.33	2.45	0.2	0.27	0.31	0.21	0.19	0.26	0.55	0.27	0.4
77706	Abcb5	0	0	0	0	0	0	0	0	0	0	0	0	0	0	0.22	0	0	0	0	0	0	0.01	0.01	0.07	0	0	0.04	0.02	0	0.11	0	2.94	0.08	0.29	0	2.12	0.04	0	0.03	0.02	0	0.01	0	0.03	0.05
74104	Abcb6	0.08	0.08	0.19	0.09	0.09	0.13	0.07	0.12	0.13	0.07	0.03	0.06	0.06	0.04	0.05	0.06	0.03	0.06	0.02	0.03	0.07	0.01	0.06	0.09	0.19	0.13	0.09	0.12	0.05	0.13	0.34	0.25	0.26	0.33	0.33	0.42	0.19	0.18	0.11	0.18	0.13	0.12	0.5	0.39	0.08
11306	Abcb7	0.18	0.2	0.16	0.23	0.23	0.16	0.26	0.3	0.22	0.08	0.13	0.11	0.19	0.17	0.03	0.09	0.27	0.31	0.13	0.16	0.27	0.16	0.28	0.41	0.33	0.85	0.37	0.55	0.25	0.91	0.8	0.96	1.09	0.97	0.88	1.47	1.25	0.77	0.87	0.35	0.96	0.94	0.93	0.34	0.72
74610	Abcb8	0.01	0.05	0.21	0.02	0.01	0.03	0.04	0.04	0.03	0.02	0.03	0.02	0.04	0.03	0	0.04	0.03	0.15	0.05	0.05	0.03	0.04	0.12	0.07	0.19	0.2	0.19	0.17	0.14	0.28	0.2	0.18	0.32	0.2	0.15	0.31	0.13	0.35	0.23	0.08	0.4	0.15	0.24	0.16	0.18
17250	Abcc1	0.01	0.01	0	0	0	0	0.03	0	0	0	0	0	0	0.01	0	0	0.01	0	0	0	0	0	0	0	0	0	0	0	0	0	0	0	0	0	0	0	0	0	0	0	0	0	0	0	0
244562	Abcc12	0	0	0	0	0	0	0	0	0	0	0	0	0	0	0	0	0	0	0	0	0	0	0	0	0	0	0	0	0	0	0	0	0	0	0	0	0.08	0	0	0	0	0	0	0	0
12780	Abcc2	0	0	0	0	0.01	0	0.01	0.02	0.01	0	0.01	0.02	0.01	0.01	0.04	0.01	0.04	0.08	0.05	0.3	0.1	0.18	0.89	0.4	0.78	0.5	0.48	0.5	0.27	0.26	1.14	0.65	0.65	0.46	0.27	0.46	0.49	0.49	0.61	0.47	0.33	0.19	0.61	0.9	0.99
76408	Abcc3	0	0.01	0	0	0	0	0	0.01	0.01	0	0	0	0	0	0	0	0	0.01	0	0	0	0	0.02	0	0.01	0	0.03	0.01	0.01	0	0.07	0.04	0.05	0.14	0.01	0.02	0.03	0.25	0.06	0.08	0.03	0.14	0.26	0.3	0.21
239273	Abcc4	0	0	0	0	0	0	0	0	0.01	0	0	0	0	0	0	0	0	0	0	0	0	0	0	0	0	0	0	0	0	0	0	0	0	0	0	0	0	0	0	0	0	0	0	0	0
27421	Abcc6	0	0	0	0	0	0	0	0.03	0.02	0.01	0.04	0.02	0	0.03	0.03	0.06	0.01	0.11	0.05	0.19	0.05	0.02	0.31	0.11	0.31	0.15	0.2	0.26	0.45	0.54	0.62	0.64	0.55	1.62	1.11	1.41	0.84	0.94	0.92	1.03	0.52	0.27	0.46	0.65	0.52
20927	Abcc8	0	0	0	0	0	0	0	0	0	0	0	0	0	0	0	0	0	0	0	0	0	0	0.01	0	0	0	0	0	0	0	0	0	0	0	0	0.01	0	0	0	0	0	0	0.01	0	0
20928	Abcc9	0	0	0	0	0	0	0	0	0	0	0	0	0	0	0	0	0	0	0	0	0	0	0	0	0.02	0	0	0.03	0	0	0.03	0.01	0.01	0	0	0.01	0	0	0	0	0	0	0.01	0	0
11666	Abcd1	0	0	0.02	0.02	0.03	0.01	0.02	0.04	0.02	0	0.01	0.02	0	0.01	0.01	0	0.01	0.01	0	0.01	0.01	0	0.01	0.05	0.5	0.03	0.05	0	0.02	0.02	0.04	0.3	0.24	0	0.03	0.06	0.03	0.23	0.37	0.01	0.01	0.01	0.01	0.04	0.1
26874	Abcd2	0	0	0	0	0	0	0	0.02	0.03	0	0.01	0.05	0.01	0.01	0.19	0.06	0.04	0.42	0.74	1.46	0.87	0.62	1.07	1.03	2.9	2.79	3.31	2.71	4.64	3.86	6.28	4.61	4.35	3.31	3.23	2.87	0.84	1.06	1.31	0.34	0.77	0.34	0	0.01	0
19299	Abcd3	0.04	0.08	0.08	0.1	0.07	0.08	0.15	0.14	0.18	0.12	0.12	0.15	0.13	0.14	0.23	0.18	0.23	0.56	0.61	0.97	0.33	1.17	2.68	1.6	5.85	5.72	2.87	3.76	3.8	6.03	5.29	7.02	4.98	6.04	5.42	6.87	9.68	7.67	9.81	12.2	11.99	5.9	9.44	14.09	11.58
19300	Abcd4	0	0	0	0	0	0	0	0	0	0.01	0	0	0	0	0	0.01	0	0	0	0.01	0	0	0	0	0	0	0.01	0.02	0	0.01	0.05	0.01	0	0.01	0	0	0	0	0	0	0	0	0	0	0
24015	Abce1	2.33	2.95	4.87	3.2	4.32	3.31	2.63	2.86	2.76	1.72	1.74	2.71	2.32	1.58	1.78	1.82	1.72	2.07	1.15	1.53	1.34	1.75	3.45	2.14	2.59	4.26	3.22	1.66	2.44	3.33	1.76	2.75	3.1	2.56	3.67	3.09	3.36	2.63	2.56	1.53	1.44	2.26	2.64	2.45	2.08
224742	Abcf1	1.54	1.34	2.45	1.85	1.14	1.17	1.43	0.58	0.53	0.8	0.72	1.22	0.84	1.29	0.76	0.96	0.8	1.56	0.53	0.64	1.04	0.45	2.36	0.82	1.1	0.69	2.37	0.78	1.09	1.04	2.1	0.99	0.64	0.7	1.81	1.32	1.29	2.02	1.71	1.12	1.44	0.56	0.72	1.92	1.21
27407	Abcf2	1.29	1.38	1.93	1.58	1.42	1.21	1.01	0.74	0.83	0.5	0.64	0.67	0.89	0.74	0.4	0.72	0.33	0.41	0.57	1.19	0.5	0.49	0.36	0.22	0.5	0.45	0.4	3.61	0.45	0.44	0.36	0.41	0.95	0.36	0.21	0.27	3.41	0.47	0.19	4.81	0.28	0.3	0.44	0.4	2.37
27406	Abcf3	0.14	0.18	0.45	0.14	0.33	0.28	0.12	0.15	0.33	0.19	0.11	0.13	0.34	0.12	0.39	0.18	0.07	0.55	0.23	0.39	0.45	0.07	4.06	6.58	3.42	5.37	1.96	0.94	0.02	5.72	0.18	5.06	7.61	8.25	0.11	0.18	8.05	0.22	19.83	0.23	0.08	1.13	3.26	0.14	4.45
11307	Abcg1	0	0	0	0	0	0	0	0	0	0	0	0	0	0	0	0	0	0	0	0	0	0	0	0	0	0	0	0	0.01	0	0	0	0	0	0	0	0	0	0	0	0	0	0	0	0
26357	Abcg2	0.35	0.42	0.22	0.67	0.24	0.34	0.36	0.53	0.4	0.61	0.34	0.77	0.28	0.47	0.4	0.2	0.28	0.2	0.17	0.33	0.17	0.12	0.28	0.09	0.28	0.06	0.16	0.41	1.09	0.29	0.39	0.41	3.38	0.17	0.29	0.25	0.12	1.75	0.59	3.21	0.09	0.81	3.77	1.33	2.52
27405	Abcg3	0	0	0.01	0.02	0	0	0.01	0.04	0	0	0	0.01	0	0.09	0.01	0	0	0	0.02	0	0.01	0	0	0.01	0.01	0	0	0	0.01	0.01	0	0	0.02	0	0	0	0	0	0	0	0	0	0	0	0
192663	Abcg4	0.03	0.02	0	0.02	0.04	0.01	0.03	0	0	0.04	0.01	0.01	0.03	0.02	0	0.02	0	0	0.01	0	0	0	0	0	0	0	0	0	0	0	0	0	0	0	0	0	0	0	0	0	0	0	0	0	0
27409	Abcg5	0	0	0	0	0	0	0	0	0	0	0	0	0	0	0	0	0	0	0	0	0	0.01	0.05	0	0.04	0.01	0.09	0.08	0.14	0.06	0.26	0.13	0.34	0.76	1.15	0.54	0.22	0.25	0.11	0.06	0	0.02	0.13	0.05	0.01
67470	Abcg8	0	0	0	0	0	0	0	0	0	0	0	0	0	0	0	0	0	0	0	0	0	0.03	0.05	0.01	0.05	0.04	0.03	0.31	0.17	0.24	0.3	0.57	0.44	1.29	0.85	0.41	0.29	0.11	0.3	0.14	0.15	0	0.28	0.04	0.04
213012	Abhd10	0.04	0	0.03	0.03	0.04	0.08	0.04	0.06	0.02	0.03	0.13	0.14	0.03	0.04	0.06	0	0.04	0.22	0.01	0.11	0.12	0.01	0.03	0.25	0.14	0.2	0.15	0.14	0.24	0.61	0.09	1.44	0.79	1.24	0.36	0.18	1.11	0.06	0.1	0.05	0.02	0	0.01	0	0.01
68758	Abhd11	0.06	0.08	0.05	0.18	0.1	0.17	0.14	0.17	0.09	0.13	0.12	0.1	0.09	0.1	0.03	0.37	0.35	0.27	0.68	0.32	0.13	0.29	0.46	1.02	1.36	1.12	0.57	0.77	0.52	0.58	1.39	1.05	0.6	1.15	3.75	1.64	1.17	1.66	1.68	3.44	2.78	1.72	1.67	1	3.46
76192	Abhd12	0.01	0.04	0.07	0.04	0.06	0.18	0.02	0.15	0.01	0.01	0.06	0.17	0.04	0.01	0.05	0.06	0.04	0.06	0.06	0.07	0.04	0.03	0.36	0.07	0.11	0.22	0.35	0.26	0.88	0.21	0.4	1.14	0.99	0.76	0.14	0.93	1.44	2.19	0.51	0.21	0.18	0.48	0.41	0.26	0.09
68644	Abhd14a	0	0	0	0	0	0.01	0	0	0	0	0	0	0	0	0	0	0	0	0	0	0	0	0	0	0	0.06	0	0	0	0	0	0	0	0.17	0	0	0	0	0	0	0	0	0	0	0
76491	Abhd14b	0.69	0.63	0.52	1.19	0.67	0.9	2.03	3.84	2.6	1.99	2.64	3.57	3.29	1.44	4.83	4	5.1	9.73	8.48	6.66	10.3	7.85	12.31	10.62	20.71	25.12	12.17	23.52	19.95	25.99	49.03	38.02	21.49	39.32	50.17	51.2	50.72	77.33	66.48	77.36	65.92	43.6	74.85	50.53	58.5
67477	Abhd15	0	0	0	0	0	0	0	0	0	0	0	0	0	0	0.03	0	0	0	0	0	0.01	0	0.12	0	0.11	0.12	0.03	0	0.87	0	0.03	0	0	0.02	0	0.11	0.05	0	0	0.17	0	0	0.03	0.01	0.03
193742	Abhd16a	0.03	0.03	0.01	0.08	0.04	0.03	0.32	0.01	0.05	0.02	0.05	0.12	0.07	0.09	0.03	0.1	0.08	0.06	0.07	0.01	0.07	0.03	0.19	0.03	0.05	0.05	0.07	0.11	0.28	0.31	0.26	0.63	0.19	0.44	0.42	0.4	0.25	0.38	0.24	0.14	0.31	0.13	0.24	0.21	0.19
241850	Abhd16b	0	0	0	0	0	0	0	0	0	0	0	0	0.04	0	0	0	0	0	0	0	0	0	0.01	0	0	0.03	0	0.01	0.01	0.02	0.12	0	0.01	0.01	0.01	0.01	0.02	0.02	0.01	0	0	0	0.01	0.01	0.01
216169	Abhd17a	0	0	0	0	0	0	0	0	0	0	0	0	0	0	0	0	0	0	0	0	0	0	0	0	0	0.02	0	0	0	0	0	0	0	0.01	0	0	0	0	0	0	0	0	0	0	0
70178	Abhd17c	0	0	0	0	0	0	0	0	0	0	0	0	0.01	0	0	0	0	0	0	0	0	0	0	0	0	0	0	0	0	0	0	0	0	0.01	0.01	0	0	0	0	0	0	0	0	0	0.08
269423	Abhd18	0	0	0	0	0.03	0	0	0	0	0	0	0	0	0	0	0	0.01	0	0	0	0	0	0	0	0.15	0	0.09	0	0	0	0	0	0.18	0.01	0	0.21	0	0	0.22	0.02	0	0	0.13	0.01	0
54608	Abhd2	0	0	0	0	0	0	0	0	0	0	0	0	0	0	0	0	0	0	0	0	0	0.04	0.03	0.07	0.29	0.13	0.16	0.57	0.36	0.62	0.37	0.43	0.68	0.09	0.02	0.23	0.03	0.19	0.06	0.14	0	0	0	0	0
106861	Abhd3	0	0	0	0	0	0	0	0	0	0	0	0	0	0	0	0	0	0	0	0	0	0	0	0	0.3	0	0.01	0	0.32	0.02	0	0	0.14	0	0.03	0.02	0.19	0	0	0.19	0	0.11	0.08	0.13	0.14
105501	Abhd4	0	0	0	0.02	0	0	0	0	0.01	0.01	0.01	0	0	0	0	0	0.01	0	0	0.01	0	0	0.01	0.01	0.01	0.01	0.01	0	0.03	0.04	0	0.07	0.08	0.02	9.12	0.05	3.39	0	0.03	0.11	0.06	0.09	0.08	0.15	0.21
67469	Abhd5	0	0	0	0	0	0	0	0.07	0.02	0	0	0.01	0	0	0.08	0.01	0.01	0.24	0.15	0.13	0.04	0.04	0.07	0.08	0.24	0.19	0.19	0.14	0.07	0.18	0.05	0.08	0.12	0.02	0	0.56	0.01	0	0.04	0.01	0.03	0.01	0.05	0.16	0.02
66082	Abhd6	0.01	0.02	0.14	0.01	0.1	0.08	0.04	0.07	0.09	0.01	0.07	0.04	0.04	0.19	0.03	0.04	0.04	0.01	0.04	0.03	0	0.06	0.53	0.14	0.74	0.61	0.62	0.29	0.53	0.35	0.44	0.75	0.46	0.57	0.77	0.36	0.52	0.51	0.73	0.49	0.65	0.35	0.54	0.63	0.57
11308	Abi1	0.15	0.16	0.38	0.04	0.21	0.26	0.06	0.33	0.43	0.2	0.13	0.22	0.12	0.14	0.31	0.11	0.12	0.56	0.07	0.16	0.04	0.22	0.28	0.14	0.17	0.29	0.31	0.19	0.13	0.15	0.26	0.26	0.28	0.19	0.32	0.14	0.22	0.12	0.09	0.1	0.15	0.07	0.13	0.15	0
329165	Abi2	0.05	0.03	0.11	0.02	0.01	0.07	0.04	0.01	0.05	0.04	0	0.02	0.04	0.07	0	0.03	0.05	0.07	0	0.09	0.01	0.06	0.07	0.02	0.07	0.07	0.06	0.13	0.02	0.02	0.2	0.08	0.11	0.07	0.07	0	0.06	0	0	0	0.03	0.03	0.04	0.03	0
66610	Abi3	0	0	0	0	0	0	0.01	0.02	0	0.04	0.03	0	0.01	0.03	0.04	0.02	0.02	0	0	0	0	0	0.04	0.14	0	0.05	0.07	0.12	0	0.05	0	0.09	0.03	0	0	0	0	0.01	0	0	0	0	0.03	0	0
320712	Abi3bp	0	0	0	0	0	0	0	0	0	0	0	0	0	0	0	0	0	0	0	0	0	0	0	0	0	0	0	0	0	0	0	0	0	0	0	0	0	0	0	0	0	0	0	0	0.01
230234	Abitram	0.18	0.11	0.36	0.09	0.19	0.19	0.13	0.01	0.1	0.04	0.07	0.07	0.12	0.13	0.11	0.09	0.13	0.04	0.03	0.16	0.02	0.03	0.03	0.02	0.1	0.11	0.14	0	0	0	0.11	0	0.12	0.04	0.08	0.03	0	0	0	0.05	0	0	0	0.01	0
11350	Abl1	0.01	0	0.01	0	0	0	1.36	0	0	0	0.94	0	0	0	0	0	0	0	0	0	0	0	0	0	0.01	0	0.01	0.01	0	0.01	0	0.07	0	0	0	0	0	0	0	0	0	0	0	0	0
11352	Abl2	0.01	0	0.01	0	0	0	0	0	0	0	0	0	0	0	0	0	0	0	0	0	0	0	0	0	0	0	0.01	0.01	0	0	0	0	0	0	0	0	0	0	0	0	0	0	0	0	0
226251	Ablim1	0	0	0	0	0.01	0	0	0.03	0.03	0.02	0.01	0.02	0.02	0	0.07	0.05	0.03	0.11	0.07	0.08	0.05	0.13	0.14	0.19	0.28	0.16	0.18	0.2	0.32	0.27	0.21	0.12	0.24	0.2	0.43	0.27	0.13	1	0.19	0.06	0.11	0.05	0.07	0.14	0.11
319713	Ablim3	0	0	0	0	0	0	0	0	0	0	0	0	0	0	0	0	0	0	0	0	0	0	0	0	0	0	0	0	0	0	0	0	0	0	0	0	0	0	0	0	0	0.01	0.04	0.07	0.05
109934	Abr	0	0	0	0	0	0	0	0.01	0	0.01	0	0	0	0.02	0.01	0	0	0	0	0.01	0	0	0	0	0.01	0.01	0.01	0	0.01	0.02	0.04	0.01	0	0	0	0	0	0	0	0	0	0	0	0	0
73112	Abracl	4.11	2.93	16.91	3.23	7.11	3.92	3.53	4.88	4.3	3.98	2.51	3.33	3.22	1.31	3.26	3.49	1.42	4.88	2.51	4.76	1.22	3.63	6.32	4.47	12.03	2.26	6.6	4.68	2.15	6.73	2.04	6.21	10.12	4.67	3.25	4.06	1.59	3.18	5.87	1.89	0.32	1.05	1.7	1.61	1.22
70681	Abraxas1	0.01	0.01	0	0	0.01	0.15	0	0.01	0.01	0	0.03	0	0.01	0	0	0	0	0	0	0	0	0	0	0	0	0	0	0	0	0	0	0	0	0	0	0	0	0	0	0	0	0	0	0	0
109359	Abraxas2	0	0.04	0.08	0.06	0.1	0.04	0.08	0.07	0.01	0.03	0.04	0.05	0.02	0.03	0.09	0.07	0.05	0.19	0.1	0.06	0.29	0	0.24	0.22	0.12	0.13	0.34	0.07	0.46	0.2	0.24	0.1	0.41	0.2	0.29	1.03	0.28	0.42	0.26	0.16	0.52	0.05	0.36	0.32	1.46
30946	Abt1	0.09	0.07	0.16	0.37	0.07	0.11	0.18	0.02	0.29	0.02	0	0.39	0	0.02	0.08	0.01	0	0.31	0.1	0.11	0	0.01	0.1	0	0.01	0	0.18	0.02	0.04	0.02	0.01	0	0.61	0	0.06	0	0.01	0.01	0.01	0	0	0.04	0.11	0	0.05
80283	Abtb1	0.05	0	0	0	0.08	0	0	0	0.01	0	0	0	0	0	0	0	0	0	0	0	0	0	0	0	0	0	0	0	0	0	0	0	0	0.13	0	0	0.12	0	0	0	0	0	0	0	0
99382	Abtb2	0	0	0	0	0	0	0	0	0	0	0	0	0	0	0	0	0	0	0	0	0	0	0	0	0	0	0	0	0	0	0	0	0	0	0	0	0	0	0	0	0	0.01	0	0	0
113868	Acaa1a	0.3	0.57	2.76	0.46	0.84	0.81	0.62	1.63	0.97	0.95	1.15	1.74	0.66	0.64	2.03	1.49	1.29	4.57	4.87	4.07	1.56	4.4	6.62	11.4	24.12	18.81	19.28	18.28	13.95	24.67	17.95	25.61	26.76	34.34	20.4	32.91	22.13	24.03	21.99	28.98	21.07	18.68	18.67	16.49	18.52
235674	Acaa1b	0.11	0.25	2.31	0.31	0.29	0.35	0.36	0.67	0.42	0.67	0.83	0.61	0.33	0.36	0.72	0.9	0.6	1.78	2.73	2.02	1.47	2.61	3.02	7.5	16.74	13.57	13.37	11.99	8.06	22.28	9.25	16.99	20.51	32.27	16.65	34.53	20.83	28.47	21.29	32.75	21.9	15.08	21.87	21.19	23.77
52538	Acaa2	5.72	3.82	8.34	7.15	6.77	5.19	9.5	29.19	24.53	22.36	18.98	32.98	16.79	11.54	63.2	37.21	37.35	197.22	155.84	147.03	120.27	181.45	202.89	268.13	455.12	394.46	530.38	566.59	619.23	817.47	918.23	562.65	884.81	1359.41	1311.31	1224.57	930.69	883.04	784.42	850.12	618.97	859.33	667.3	765.69	676.32
107476	Acaca	0.12	0.23	0.3	0.22	0.19	0.25	0.21	0.24	0.23	0.16	0.25	0.36	0.2	0.16	0.37	0.2	0.35	0.62	0.62	0.57	0.38	0.5	0.83	0.36	0.57	0.47	0.5	0.53	0.31	0.42	0.54	0.51	0.68	0.5	0.57	0.38	0.75	1.49	1.52	0.68	1.01	1.31	0.97	1.37	1.12
100705	Acacb	0.02	0.02	0.02	0	0.01	0.02	0.01	0.01	0.01	0.01	0.02	0.02	0.02	0.01	0.03	0.01	0.01	0.03	0.04	0.06	0.05	0.04	0.1	0.03	0.08	0.06	0.06	0.04	0.02	0.04	0.01	0.02	0.03	0.02	0.03	0.01	0.04	0.23	0.4	0.24	0.52	0.48	0.44	0.52	0.46
71985	Acad10	0	0	0	0	0	0	0	0.02	0	0.01	2.28	0.01	0.65	1.05	1.62	0.01	2.6	1.95	0.1	0.76	0.92	0.05	0.91	3.5	1.66	1.58	0.31	1	1.93	1.43	1.31	1.24	2.07	2.01	3.9	4.32	1.49	1.35	1.71	1.36	3.6	2.13	2.09	2.54	1.88
102632	Acad11	0.15	0.13	0.12	0.15	0.25	0.07	0.17	0.62	0.44	0.15	0.22	0.28	0.39	0.4	1.07	0.37	0.72	1.39	1.65	1.96	1.14	2.34	3.01	5.31	7.52	9.18	9.79	7.27	7.19	11.01	9.43	9.81	16.1	6.51	5.82	10.57	4.51	8.74	7.81	7.24	6.98	5.56	4.94	6.41	5.38
338350	Acad12	0	0	0	0	0	0	0.01	0.02	0	0.01	0.01	0.04	0.01	0.01	0.02	0.02	0.03	0.08	0.05	0.07	0.05	0.05	0.1	0.13	0.23	0.3	0.17	0.3	0.39	0.27	0.38	1.03	0.66	1.26	1.43	1.15	0.82	1.07	0.71	0.6	0.77	0.54	1.25	0.38	0.65
66948	Acad8	0.07	0.07	0.07	0.1	1.04	0.14	0.18	0.1	0.18	0.12	0.21	0.15	0.16	0.13	0.24	0.16	0.35	0.42	0.85	0.69	0.31	0.79	1.5	1.11	2.88	1.88	1.91	3.77	8.25	3.03	5.44	6.17	3.7	7.35	14.81	7	6.67	6.24	6.88	7.6	6.03	8.44	6.59	5.25	7.09
229211	Acad9	0.53	0.66	0.76	0.34	0.61	0.34	0.32	0.49	0.43	0.67	0.23	0.87	0.26	0.56	1.26	1.5	0.62	0.37	0.38	0.43	0.81	0.88	1.1	0.93	2.61	1.21	1.49	2.5	2.25	1.91	3.13	2.34	4.2	4.31	4.37	6.76	8.1	3.77	6.73	11.7	6.24	1.69	4.22	1.3	3.22
11363	Acadl	2.09	2.35	3.71	3.44	3.62	2.78	3.76	8.55	9.3	10.31	4.99	7.72	8.03	5.41	13.46	16.73	13.93	25.68	23.58	23.7	21.05	35.14	46.74	45.66	102.62	90.2	72.82	110.11	150.3	129.44	153.78	211.27	154.19	195.73	278.77	184.13	94.5	113.24	84.79	59.62	75.04	74.95	26.5	38.04	29.58
11364	Acadm	1.04	2.31	1.72	1.21	2.41	1.94	2.05	6.08	3.82	4.6	3.02	4.85	3.54	2.81	14.98	9.78	8.43	27.99	39.87	33.81	20.16	43.87	36.52	44.46	86.75	67.93	71.84	77.6	88.37	76.54	131.04	66.83	68.88	125.81	131.66	96.55	59.37	64.96	58.22	59.71	41.21	47.82	33.61	34.86	38.62
11409	Acads	1.93	1.85	4.02	1.51	1.18	1.7	2.07	4.2	3.07	3.71	3.17	3.59	3.59	2.18	5.31	6.22	5.8	9.13	14.2	13.14	5.61	13.53	15.55	13.9	33.54	33.63	24.9	51.82	38.42	54.31	74	49.52	60.23	85.28	95.28	87.52	62.34	81.84	67.86	43.14	51.8	51.19	28.02	39.73	40.33
66885	Acadsb	0.06	0.44	0.23	0.2	0.18	0.22	0.24	0.35	0.26	0.5	0.28	0.49	0.32	0.38	0.65	0.51	0.38	1.01	0.72	0.93	0.63	1.42	0.92	0.93	2.15	1.38	1.3	1.28	0.73	2.67	3.24	1.72	1.62	3.7	4.4	4.85	5.51	7.89	4.99	8.99	5.69	4.25	6.88	6.57	7.84
11370	Acadvl	0.61	0.6	0.93	0.87	0.72	0.93	1.45	2.08	1.78	1.08	1.37	1.79	1.33	1.26	2.95	1.73	1.84	8.03	3.52	4.95	5.04	7.31	14.64	13.1	35.2	36.02	38.47	43.11	43.88	50.53	78.26	62.58	58.68	74.36	75.71	90.96	52.66	54.36	53.46	38.33	26.69	28.25	24.64	28.21	29.15
11595	Acan	0	0	0	0	0	0	0	0	0	0.01	0	0	0	0	0	0.01	0	0	0.02	0	0	0.03	0	0	0	0	0	0.04	0	0.02	0.02	0	0.01	0	0	0	0	0	0	0	0	0	0	0	0
78618	Acap2	0.47	0.02	0.77	0.05	0.08	0.28	0.11	0.09	0.08	0.05	0.04	0.06	0.11	0.01	0.03	0.03	0.05	0.14	0.21	0.13	0.18	0.25	0.03	0.45	0.67	0.14	0.26	0.05	0.12	0.65	0.17	0.12	1.58	0.1	0.07	0.05	0.07	3.42	0.07	0	0	0.02	0.01	0.01	0.01
140500	Acap3	0	0	0	0	0	0	0	0	0	0	0	0	0	0	0	0	0	0	0	0	0	0	0	0	0	0	0.06	0	0	0	0	0.01	0.29	0	0.01	0.1	0	0	0.1	0.14	0.2	0.03	0	0	0.06
110446	Acat1	6.79	4.3	3.77	6.71	4.28	2.65	9.09	15.87	8.84	12.3	9.37	15.05	8.01	7.82	25.41	15.29	18.75	37.11	52.2	48.68	48.01	38.16	69.67	94.84	147.58	178.24	169.19	151.58	125.88	258.09	222.54	231.46	355.78	351.48	323.95	543.32	181.55	249.83	216.57	92.95	94.75	70.11	47	82.68	82.09
110460	Acat2	1.05	1.28	1.24	1.31	2	1.23	1.21	3.7	2.74	1.95	2.29	4.6	2.07	2.19	6.16	2.93	5.11	11.88	6.05	9.43	11.38	7.66	9.41	9.45	8.79	9.12	14	9.54	8.37	14.32	8.82	13.12	8.24	15.56	18.35	30.53	32.3	53.28	49.38	32.45	29.27	24.52	19.13	20.19	20.28
224530	Acat3	0.78	0.77	0.53	1.1	0.85	0.58	1.19	2.55	1.64	1.37	1.52	3.45	1.82	1.41	4.02	4.28	4.98	6.45	5.24	8	6.1	6.82	5.74	14.71	10.78	10.25	15.1	13.35	10.27	22.51	12.58	13.87	11.41	26.89	31.26	45.48	57.24	51.97	48.85	51.99	38.24	28.51	22.58	33.98	36.27
170760	Acbd3	0.15	0.04	0.33	0.13	0.16	0.26	0.2	0.18	0.28	0.18	0.2	0.25	0.22	0.17	0.19	0.1	0.22	0.69	0.23	0.45	0.31	0.29	0.82	0.48	1.6	1.82	0.39	1.66	0.86	0.83	1.05	2.42	0.98	2.24	0.72	0.27	1.99	1.28	0.47	0.15	0.08	1.73	0.07	0.9	0.86
74159	Acbd5	0.01	0.02	1.18	0.64	0.06	0.12	0.01	3.07	0.3	0.01	0.14	0.04	0.03	0.01	2.25	0.03	0.03	2.21	0.15	0.32	2.13	0.45	0.58	1.34	0.71	3.26	1.44	0.84	1.57	2.46	2.29	2.48	2.15	2.18	2.35	3.21	1.93	3.97	4.61	1.59	2.59	2.52	6.03	4.17	3.84
72482	Acbd6	0.13	0.07	0.14	0.07	0.11	0.11	0.29	0.05	0.07	0.07	0.04	0.11	0.11	0	0.42	0.06	0.06	0.04	0	0.04	0.04	0.03	0.11	0.05	0.15	0.15	0.06	0	0	0.38	0	0.07	0.11	0.02	0	0.02	0.01	0	0	0.15	0	0	0.04	0.17	0.29
497652	Acd	0	0	0.06	0	0.11	0	0	0.16	0	0	0	0	0	0	0	0	0	0	0	0	0	0	0	0	0	0	0	0	0	0	0	0	0	0	0	0	0	0	0	0	0	0	0	0	0
66190	Acer3	0	0	0	0	0	0	0	0	0	0	0	0	0	0	0.01	0	0	0	0	0	0	0	0	0	0.01	0	0.01	0	0	0	0	0.02	0	0	0	0	0	0	0	0	0	0	0	0	0
56215	Acin1	1.04	0.66	2.1	0.81	1.41	1.56	0.69	0.86	0.89	0.81	0.77	0.86	0.75	0.69	1.54	1.08	0.76	1.08	0.54	0.78	1.02	0.56	0.77	0.46	2.28	0.76	0.77	0.87	0.73	0.66	0.7	0.98	0.7	0.8	1	0.4	0.66	0.28	0.23	0.52	0.3	0.29	0.32	0.26	0.31
13349	Ackr1	0	0.02	0	0	0	0	0.49	0	0	0	0	0	0	0	0	0	0	0	0	0	0	0	0	0	0	0	0	0	0	0	0	0	0	0	0	0	0	0	0	0	0	0	0	0	0
104112	Acly	2.42	3.12	3.77	4.27	4.67	5.13	4.6	8.33	7.58	5.3	5.21	9.01	5.29	5.6	11.18	6.17	7.89	14.22	18.25	16.3	17.77	7.44	8.16	6.85	10.99	8.57	9.11	4.99	5	5.78	3.27	6.4	3.92	2.58	3.07	4.24	8.41	26.31	23.43	32.8	25.54	18.21	21.8	19.8	19.56
266645	Acmsd	0	0	0	0	0	0	0	0	0	0	0	0	0	0	0	0	0	0	0	0	0	0	0	0	0	0	0	0	0	0	0	0	0	0.04	0	0	0.15	0	0.06	2.34	0.16	1.13	0.32	0.44	0.49
230161	Acnat1	0	0	0	0	0	0	0	0	0	0	0	0	0	0.01	0.02	0	0.01	0.13	0.11	0.55	0.02	0.02	0.18	0.19	0.58	1.06	0.18	0.7	0.67	1.55	1.13	0.9	0.95	0.97	0.98	1.97	0.89	1.16	0.94	0.2	0.83	0.26	0.33	0.41	0.47
209186	Acnat2	0	0	0	0	0	0	0	0	0	0	0	0	0	0	0.01	0	0	0.04	0.03	0.53	0.01	0	0.07	0.04	0.2	0.27	0.13	0.47	0.31	0.84	1.57	0.35	0.8	0.7	0.83	1.13	0.95	0.75	0.59	0	0.19	0.29	0.11	0.1	0.14
11428	Aco1	0.38	0.4	1.42	1.23	0.89	1.15	0.84	2.44	1.71	1.03	1.59	2.14	1.58	0.92	4.87	2.3	3.4	9.38	6.66	9.75	7.04	8.96	13.68	10.34	12.13	14.12	9.34	11.18	9.97	13.33	12.62	9.29	10.65	11.92	10.96	14.97	14.18	26.1	19.75	26.28	23.72	16.92	23.65	32.02	29.5
11429	Aco2	5.8	6.08	11	5.51	8.15	7.33	6.36	11.3	8.83	9.13	6.78	8.91	7.81	6.27	12.78	9.67	10.01	20.4	14.78	19	20.7	18.85	26.33	33.73	44	43.81	35.87	32.16	35.04	41.9	41.45	38.87	37.29	31.57	23.51	35.37	28.65	36.95	33.81	28.47	49.11	35.29	29.2	33.62	37.21
26897	Acot1	0.83	0.99	1.2	0.59	0.92	0.99	0.94	1.68	1.66	0.7	1.87	1.83	0.63	0.95	1.74	1.45	1.29	3.51	1.53	1.71	2.01	1.78	4.42	5.51	9.46	7.31	8.42	4.45	3.36	3.9	4.17	4.67	3.6	1.88	1.23	1.65	0.7	0.8	0.81	2.4	3.05	2.89	1.61	2.03	2.67
64833	Acot10	0.02	0.03	0.02	0.01	0.01	0.03	0	0.01	0.01	0.02	0.01	0.04	0.06	0.02	0.01	0.03	0.03	0.03	0.1	0.14	0	0.03	0.04	0.02	0.07	0.07	0.03	0.04	0.28	0.01	0.05	0.04	0.04	0.54	0.35	0.01	0.11	0	0.02	0.24	0.75	0.01	0.01	0.02	0
329910	Acot11	0.03	0.02	0.15	0.01	0.02	0.04	0.04	0.02	0.02	0.02	0.03	0	0	0.02	0	0.01	0	0	0	0	0	0	0	0	0	0	0	0	0	0	0	0	0	0	0	0	0	0	0	0	0	0.01	0	0.05	0.02
74156	Acot12	0	0	0	0	0	0	0	0.05	0.02	0	0	0.02	0	0	0.01	0	0.01	0.19	0.32	0.21	0.09	0.28	0.64	0.28	1.07	1	0.72	1.31	1.27	1.54	4.72	1.93	2.3	2.44	2.29	2.92	2.32	2.95	2.74	2	1.39	1.69	0.95	1.48	0.97
66834	Acot13	0.15	0.4	0.88	0.17	0.51	0.42	0.01	0.75	0.73	1.06	0.84	0.8	0.53	0.52	0.92	0.97	0.92	1.84	0	1.5	1.39	0.47	0.64	2.3	7.11	8.52	2.93	10.62	5.95	5.08	7.95	5.74	6.58	12.8	12.63	13.79	16.49	18.4	14.8	19.38	17.67	13.49	7.77	17.69	9.57
171210	Acot2	0.29	0.43	1.08	1.1	1.32	0.6	1.54	2.49	1.86	1.55	0.97	1.58	1.09	0.95	1.81	1.11	1.21	2.98	1.21	1.53	1.49	2.49	3.64	5.39	8.49	6.33	8.45	5.98	3.54	3.59	5.05	8	4.24	3.59	2.25	5.3	1.63	0.78	0.63	1.79	4.99	1.82	0.97	1.06	1.27
171281	Acot3	0.03	0.06	0.08	0.11	0.07	0.02	0.07	0.11	0.12	0.21	0.1	0.25	0.12	0.08	0.14	0.17	0.16	2.6	0.28	0.29	0.25	0.4	0.77	2.1	7.79	1.8	3.85	2.61	0.94	1.3	2.96	3.45	5.12	1.59	0.37	2.87	0.4	0.98	3.22	1.21	2.19	1.66	0.09	0.29	0.32
171282	Acot4	0.06	0.06	0.16	0.15	0.12	0.1	0.14	0.26	0.28	0.29	0.2	0.88	0.29	0.48	0.44	0.28	0.25	1.02	0.41	0.69	0.3	0.64	2.06	1.58	3.05	7.93	2.52	2.8	6.1	2.16	1.88	8.6	1.95	1.85	4.53	2.21	1.19	1.53	1.55	2.69	2.3	4.12	0.79	0.65	0.77
217698	Acot5	0.02	0.06	0.07	0.1	0.06	0.02	0.12	0.1	0.11	0.19	0.09	0.22	0.11	0.07	0.13	0.15	0.14	0.22	0.26	0.25	0.17	0.34	0.67	0.8	1.66	1.15	0.89	0.69	0.65	0.8	0.85	0.7	0.77	0.63	0.34	0.35	0.27	0.43	0.35	0.77	0.53	0.82	0.08	0.27	0.3
217700	Acot6	0.05	0.06	0.14	0.14	0.1	0.06	0.11	0.18	0.18	0.25	0.15	0.31	0.18	0.13	0.22	0.25	0.23	0.36	0.33	0.4	0.22	0.51	0.95	1.13	2.26	1.55	1.79	1.03	0.86	1.15	1.17	1.08	1.02	0.8	0.57	0.63	0.38	0.55	0.45	1.04	0.85	1	0.25	0.37	0.41
70025	Acot7	0.65	0.86	0.74	0.54	0.59	0.35	0.22	0.48	0.68	0.41	0.59	0.23	0.69	0.23	0.43	0.28	0.37	0.38	0.2	0.16	0.28	0.26	0.3	0.49	0.41	0.48	0.12	0.35	0.32	0.23	0.31	0.5	0.57	1.08	0.8	0.58	0.39	0.54	0.31	0.17	0.22	0.74	0.32	0.75	0.49
170789	Acot8	0.28	0.44	0.27	0.09	0.09	0.82	0.12	0.25	0.18	0.13	0.13	1.72	1.82	0.04	0.14	0.08	0.08	3.99	0.12	0.37	0.15	0.15	0.27	0.2	0.32	0.55	0.32	0.4	0.55	0.53	0.38	0.74	0.32	0.23	0.4	0.55	0.46	0.51	0.32	0.37	0.41	0.49	0.46	0.4	0.26
56360	Acot9	0.07	0.04	0.09	0.03	0.06	0.06	0.01	0.08	0.07	0.07	0.01	0.08	0.06	0.02	0.08	0.06	0.06	0.09	0.16	0.13	0	0.06	0.08	0.06	0.16	0.07	0.1	0.11	0.31	0.09	0.08	0.08	0.06	0.53	0.36	0.01	0.18	0	0.02	0.3	0.72	0.01	0.02	0.02	0
11430	Acox1	0.06	0.04	0.11	0.07	0.14	0.12	0.17	1.07	0.52	0.27	0.2	0.53	0.26	0.3	2.23	1.23	1.21	5.05	7.06	9.98	5.48	10.55	15.58	18.71	44.27	31.19	29.25	33.94	31.84	45.85	46.41	55.86	58.09	28.49	26.4	38.63	35.41	59.28	58.71	67.1	62.59	40.29	51.98	46.86	49.39
93732	Acox2	0	0	0	0	0	0.01	0.11	0.52	0.3	0.21	0.74	0.66	0.38	0.56	0.56	0.66	0.53	1.45	1.88	3.38	2.1	2	1.7	1.25	3.06	2.96	2.81	3.55	3.71	5.71	5.65	5.76	6.7	6.85	7.89	11.31	7.78	12.02	9.06	6.75	3.7	2.85	7.34	5.95	5.65
80911	Acox3	0.01	0	0.01	0	0	0	0	0.03	0.02	0.02	0.02	0	0.01	0.03	0.01	0.03	0.01	0.02	0.06	0	0.03	0.01	0.03	0	0.27	0.11	0.12	0.05	0.06	0.03	0.15	0.01	0.1	0.19	0.13	0.17	0.1	0.06	0.12	0.15	0.13	0.27	0.25	0.28	0.27
11431	Acp1	11.44	3.68	7.3	1.55	3.44	4.71	2.54	2.39	3.63	2.37	4.35	2.88	9.86	1.88	1.92	3.92	2.51	2.46	3.27	1.04	1.32	3.17	3.74	3.02	3.04	2.96	1.41	14.06	2.86	2.07	8.98	4.59	2.45	3.06	10.89	6.95	6.97	5.05	5.23	39.95	2.06	6.56	0.81	2.22	1.96
11432	Acp2	0.04	0.02	0	0.29	0.33	0.03	0.48	0.41	0.67	0.05	0.35	0.06	0.15	0.08	0.12	0.03	0.46	0.12	0.01	0.06	0.11	0.02	0.15	0.13	0.91	0.41	0.28	0.58	0.54	0.69	0.72	0.99	1.02	0.64	0.21	0.16	0.18	0.22	0.15	0.16	0.02	0.02	0.1	0.08	0.06
100503991	Acp4	0	0	0	0	0	0	0	0	0	0	0	0	0.03	0	0	0	0	0	0	0	0	0	0	0	0	0	0	0	0	0	0	0	0	0	0	0	0	0	0	0	0	0	0	0	0
11433	Acp5	0.52	0.43	0.73	0.29	0.84	0.52	0.44	0.3	1.15	0.45	0.31	0.83	0.4	0.46	0.21	0.5	0.16	1.22	0.08	0.46	1.4	0.75	1.44	1.27	1.13	2.01	3.79	0.34	1.39	1.54	2.73	2.4	2.23	1.18	2.62	1.7	1.22	0.57	0.3	1.02	0.44	0.66	0.89	1.24	1.4
66659	Acp6	0.02	0.03	0.08	0.03	0.15	0.21	0.05	0.06	0.05	0.05	0.05	0.11	0.07	0.04	0.08	0.03	0.09	0.11	0.22	0.13	0.16	0.21	0.43	0.2	0.36	0.58	1.26	0.62	1.28	2.77	1.4	1.11	1.09	1.76	2.14	4.06	0.83	1.58	0.67	0.29	1.66	0.81	1.13	0.9	0.91
56318	Acpp	0	0	0	0	0	0	0	0	0	0	0	0	0	0	0	0	0.1	0	0	0	0	0	0	0	0	0	0	0	0	0.03	0	0	0	0	0	0	0	0	0	0	0	0	0	0	0
11434	Acr	0	0	0	0	0	0	0	0	0	0	0	0	0	0	0	0	0	0	0	0	0	0	0	0	0	0	0	0	0	0	0	0	0	0	0	0	0	0	0	0	0	0	0	0.02	0
54137	Acrbp	0	0	0	0	0.03	0	0	0	0	0	0	0.04	0	0	0	0	0	0	0.07	0	0	0	0	0	0	0	0	0	0	0	0	0	0	0	0	0	0	0	0	0	0	0	0	0	0
264895	Acsf2	0.02	0.07	0.09	0.13	0.39	0.16	0.28	0.51	0.35	0.49	0.55	0.69	0.34	0.2	0.7	0.34	0.4	0.77	0.64	0.65	0.73	1.02	1.49	1.66	3.45	4.37	3.8	6.04	6.44	8.8	10.54	12.06	10	14.93	12.07	18.13	14.39	15.89	15.38	19.22	26.65	23.22	33.28	30.16	29.74
257633	Acsf3	0.1	0.01	0.04	0	0.06	0.06	0.02	0.07	0.05	0	0	0.14	0.02	0.01	0.01	0	0.03	0.12	0.11	0.09	0.03	0.03	0.09	0.61	0.07	0.16	0.32	0.11	0.15	0.17	0.17	0.11	0.29	0.61	1.12	0.93	2.8	0.35	0.37	0.49	0.35	0.54	0.4	0.32	0.4
14081	Acsl1	0.8	0.39	2.04	1.56	2.33	0.45	2.67	6.75	4.72	3.27	3.38	6.8	3.37	2.71	13.54	7.14	8.06	29.73	26.74	33.03	17.71	31.78	44.27	56.59	93.53	71.82	122.95	80.11	86.35	90.13	111.56	75.22	90.32	106.37	91.93	97.18	48.48	68.61	60.71	87.77	44.82	29.55	70.75	77.85	60.13
74205	Acsl3	0.03	0.07	0.11	0.24	0.07	0.04	0.1	0.11	0.09	0.05	0.08	0.05	0.1	0.22	0.12	0.1	0.06	0.23	0.12	0.26	0.08	0.01	0.04	0.04	0.02	0.05	0.05	0.09	0.02	0.1	0.02	0.03	0.14	0.07	0.08	0.02	0.01	0.34	0.19	0.05	0	0.01	0.03	0.11	0.08
50790	Acsl4	0.08	0.14	0.11	0.17	0.06	0.05	0.13	0.15	0.16	0.08	0.19	0.19	0.1	0.25	0.21	0.03	0.06	0.47	0.23	0.57	0.27	0.05	0.49	0.11	0.24	0.14	0.17	0.17	0.23	0.14	0.07	0.4	0.19	0.08	0.27	0.03	0.22	0.26	0.48	0.12	0.24	0.4	0.56	0.51	0.38
433256	Acsl5	0.28	0.24	0.16	0.6	0.38	0.21	0.9	0.97	0.97	1.14	1.42	1.67	0.96	1.09	3.1	2.74	3.2	7.15	9.26	12.26	7.66	10.85	10.55	12.17	26.93	21.98	29.26	19.75	27.75	40.11	29.82	30.83	31.35	25.95	21.77	30.49	14.61	28.72	33.97	36.43	24.17	17.55	18.48	22.76	27.51
216739	Acsl6	0	0	0.06	0.01	0	0	0.02	0.23	0.03	0.02	0.01	0	0	0	0.58	0.03	0.06	0.61	1.67	1.12	0.56	1.2	1.81	2.36	1.4	3.56	1.55	3.24	3.72	5.17	6.84	4.05	1.98	2.31	2.41	2.69	1.7	1.3	1	2.71	1.46	0.99	0.7	1.89	1.53
117147	Acsm1	0	0	0	0	0	0	0.02	0.42	0.08	0.05	0.08	0.46	0	0.04	0.4	0.07	0.13	4.87	5.15	1.89	4.98	2.14	3.33	6.49	10.34	27.5	12.18	16.18	54.37	69.14	25.31	113.79	15.86	92.33	90.41	31.61	73.34	45.9	38.4	50.36	69.99	60.78	30.79	63.67	51.54
233799	Acsm2	0	0	0	0	0	0	0	0	0	0	0	0	0	0	0	0	0	0	0	0	0	0	0	0	0	0	0	0	0	0	0	0	0	0	0	0	0	0	0	0	0	0	0	0.02	0.01
20216	Acsm3	0	0	0	0	0	0	0	0	0	0	0	0.04	0	0	0.01	0	0.01	0.05	0.12	0.05	0.06	0.21	0.28	0.24	0.68	0.68	0.78	0.88	1.06	1.34	4.21	0.96	2.27	3.76	2.29	2.28	2.84	2.7	3.09	1.28	2.12	1.39	1.86	1.79	2.03
233801	Acsm4	0	0	0	0	0	0	0	0	0	0	0	0	0	0	0	0	0	0	0	0	0	0	0	0	0	0	0	0	0	0	0	0	0	0	0	0	0	0	0.03	0	0	0	0	0	0
272428	Acsm5	0	0	0	0	0	0	0	0	0	0	0	0	0	0	0	0	0	0	0	0	0	0	0	0	0	0	0.01	0.1	0.07	0.19	0.37	0.55	0.63	1.8	1.86	2.11	3.36	3.73	4.34	5.93	2.98	2.95	5.23	4.9	4.69
68738	Acss1	0.58	0.61	0.87	1.85	0.75	0.63	1.74	1.27	0.98	1.41	1.74	1.25	2.02	2.16	1.57	1.96	1.56	2.18	2.18	2.32	0.99	2.12	2.35	1.23	3.17	2.36	1.35	1.72	1.52	0.7	2.07	0.77	0.76	0.14	0.46	0.01	0	0	0	0	0	0	0	0	0
60525	Acss2	0.13	0.09	0.22	0.37	0.14	0.06	0.17	0.63	0.43	0.16	0.17	0.41	0.13	0.19	0.61	0.17	0.38	0.84	1.35	2.68	1.08	1.26	1.4	0.65	0.84	1.33	1.03	0.16	0.23	0.35	0.36	0.44	0.39	0.28	0.09	0.46	1.6	4.48	5.7	4.25	7.79	3.88	3.44	5.79	4.45
380660	Acss3	0	0	0	0	0	0	0	0	0	0	0	0	0	0	0	0	0	0	0	0	0	0	0	0	0.02	0.01	0.01	0.08	0.15	0.2	0.11	0.05	0.31	2.15	1.53	1.91	1.43	0.77	0.69	0.1	3.28	1.94	0.04	0.11	0.11
11459	Acta1	62.55	65.89	199.88	78.81	118.89	135.17	65.18	150.66	136.88	73.38	76.86	167.04	63.3	61.46	152.07	85.94	77.29	233.08	72.12	205.84	173.52	119.77	168.82	143.88	186.73	204.5	232.69	217.54	253.75	295.02	154.57	279.39	274.81	196.18	269.44	212.06	109.55	169.94	151	109.01	84.43	108.37	105.81	90.47	72.22
11475	Acta2	23.61	41.04	162.11	46	81.72	89.46	35.76	105.41	97.26	37.82	39.95	109.8	17.97	33.04	83.15	36.54	32.82	140.63	34.75	123.1	104.7	61.93	67.06	106.43	75.32	134.82	143.79	132.35	149.22	240.44	39.26	219.6	180.2	117.7	151.15	166.54	43.81	96.7	89.23	35.07	48.12	54.74	47.48	37.02	33.21
11461	Actb	289.58	295.09	608.73	302.87	319.9	384.95	250.26	396.96	397.03	279.64	267.6	433.65	299.47	255.25	406.61	308.7	297.65	614.57	442.23	586.07	525.8	427.33	621.6	483.6	823.41	717.78	563.4	788.88	732.12	800.61	703.13	989.94	752.47	632.49	721.46	558.78	455.47	479.24	455.67	421.01	304.21	336.19	316.38	300.64	289.82
238880	Actbl2	30.82	11.02	82.72	13.8	40.72	59.73	19.65	85.75	65.12	21.23	17.28	42.18	19.07	18.42	39.17	25.5	42.05	48.33	21.21	63.95	39.32	29.84	26.52	30.9	43.41	59.56	29.24	77.82	87.78	123.46	59.72	116.39	93.68	39.52	34.31	96.32	18.87	37.22	22.35	38.21	32.16	43.58	13.72	10.77	26.46
11464	Actc1	62.55	65.9	199.92	78.82	118.92	135.19	65.19	150.71	136.96	73.38	76.87	167.05	63.3	61.48	152.1	85.96	77.3	233.13	72.13	205.86	173.57	119.79	168.88	144	186.73	204.59	232.8	217.61	253.83	295.02	154.57	279.55	274.96	196.22	269.48	212.08	109.54	169.96	151.03	109.04	84.43	108.39	105.83	90.47	72.22
11465	Actg1	287.52	294.33	607.28	301.8	318.37	381.75	248.57	389.47	391.99	277.84	266.47	434.22	299.03	253.8	405.77	306.25	296.29	613.78	440.67	581.8	525.06	426.09	616.54	476.29	814.77	707.29	557.02	783.4	723.93	780.54	697.47	966.81	740.35	624.27	716.8	546.23	454.34	470.64	455.18	418.98	302.47	333.15	313.09	294.6	285.29
11468	Actg2	23.61	41.03	162.11	46	81.69	89.45	35.75	105.27	97.11	37.82	39.92	109.75	17.93	33.04	83.11	36.46	32.77	140.52	34.67	123.07	104.58	61.81	66.97	106.41	75.1	134.77	142.01	132.13	148.56	236.9	39.22	219.58	179.99	117.65	151.07	163.8	43.51	96.7	89.23	35.02	48.09	54.7	47.47	36.99	33.2
56456	Actl6a	1.81	2.21	2.69	1.45	2.01	1.75	1.41	2	1.44	1.6	0.9	1.5	2.13	1.15	1.35	0.81	1.2	1.74	1.39	1.01	1	0.57	0.99	0.79	0.97	0.94	1.05	0.69	0.53	0.54	1.31	0.85	0.58	0.74	0.34	0.51	0.03	0.64	0.55	0.45	0.32	0.38	0.42	0.21	0.72
83766	Actl6b	0	0.35	0.83	0	0.19	0.18	0.13	0.12	0.29	0.31	0	0.42	0.15	0.12	0	0.1	0	0.31	0.2	0	0	0	0	0	0	0	0	0.09	0	0	0	0	0	0	0	0	0	0.03	0	0	0	0	0	0	0
109711	Actn1	4.41	4.03	6.94	2.69	4.44	3.71	2.51	5.23	4.31	3.64	3.08	4.75	3.35	2.92	5.31	5.08	4.67	9.16	7.82	7.56	7.84	7.36	8.11	6.22	11.5	11.11	9.28	10.17	9.63	11.68	15.55	14.5	13.96	13.15	11.79	12.47	9.04	12.14	11.62	6.95	5.73	4.98	6.9	6.68	6.14
11472	Actn2	0.38	0.77	1.01	0.62	0.64	0.61	0.45	1.05	0.69	0.56	0.48	0.74	0.54	0.56	0.78	0.77	0.67	1.5	0.92	1.05	1.36	0.99	1.28	1.16	2.15	1.96	1.82	1.26	1.64	1.63	2.22	2.53	1.99	1.78	1.3	2.26	1.86	2.67	2.28	1.97	1.27	0.62	1.18	1.12	1.14
11474	Actn3	0.32	0.37	0.29	0.29	0.27	0.25	0.26	0.36	0.38	0.36	0.34	0.43	0.33	0.41	0.35	0.42	0.39	0.82	0.64	0.9	0.5	0.62	0.87	0.88	1.5	0.9	1.3	1.09	0.92	0.8	1.16	1.45	1.51	0.97	0.62	1.11	1.47	1.79	1.49	0.69	0.62	0.23	0.63	0.94	0.52
60595	Actn4	5.5	5.06	9.37	4.67	5.59	5.74	4.35	7.95	6.78	4.82	3.91	6.94	4.86	4.05	7.23	6.68	6.1	12.23	9.8	9.08	10.21	9.36	12.63	11.39	16.2	17.33	13.98	12.94	11.95	16.1	20.5	20.28	18.38	17.67	16.23	20.46	12.29	19.67	14.85	11.76	11.44	10.37	9.07	13.08	11.42
56444	Actr10	0.16	0.03	0.07	0.1	0.11	0.09	0.06	0.29	0.07	0.04	0.08	0.07	0.14	0.04	0.47	0.05	0.18	0.1	0.32	0.09	0.02	0.02	0.02	0.02	0.21	0.02	0.14	0.19	0.01	0.06	0.03	0	1.16	0.03	0.04	0.44	0.11	0.01	0.02	0.04	0.02	0.01	0.04	0.87	0.12
54130	Actr1a	1.22	0.76	1.45	0.61	0.77	0.82	0.53	1.08	0.72	0.85	0.73	0.59	0.55	0.65	0.58	0.88	0.63	1.1	0.67	0.77	0.63	0.57	0.64	0.74	0.77	1.14	0.7	0.49	0.73	0.44	0.59	1.14	1.12	0.98	0.58	0.9	0.69	1.21	1.31	0.65	1.94	0.19	0.51	0.34	0.81
226977	Actr1b	0.76	0.46	0.41	0.15	0.58	0.68	0.21	0.53	0.48	0.48	0.52	0.33	0.45	0.14	0.31	0.42	0.33	1.24	0.4	0.37	0.74	0.33	0.37	0.47	0.72	0.64	0.4	0.71	0.48	0.3	0.48	1.15	0.46	1.25	0.37	1.02	0.99	1.18	1.12	0.78	0.29	0.07	0.66	0.17	0.27
66713	Actr2	3.01	3.5	5.79	3.24	4.02	3.46	1.87	3.86	4.97	2.67	2.17	4.74	2.43	2.11	7.73	4.44	3.99	5.89	6.51	7.8	6.53	4.66	5.85	5.95	13.18	10.99	8.41	10.55	7.02	18.24	11.86	22.1	10.01	9.44	8.76	8.84	6.81	9.21	10.54	8.01	8.39	7.38	7.96	6.81	6.96
74117	Actr3	4	3.86	11.3	7.53	6.96	4.95	4.16	6.12	6.43	3.91	5.57	5.42	4	3.43	3.41	5.11	4.31	7.41	17.18	9.97	5.99	5.46	8.45	9.36	12.27	7.73	7.76	8.94	12.48	15.95	8.86	8.86	11.35	9.82	10.28	6.23	6.76	6.05	11.27	5.97	3.73	7.96	3.3	7.2	7.29
242894	Actr3b	0.36	0.39	0.8	0.27	0.34	0.71	0.37	0.4	0.64	0.34	0.26	0.18	0.34	0.14	0.32	0.39	0.39	0.76	0.73	0.85	0.34	0.46	0.88	0.96	1.13	1.25	0.64	1.04	0.97	1.24	1.81	1.22	0.92	1.49	1.38	0.83	1.08	0.57	0.53	0.8	0.5	0.84	0.31	0.36	0.35
109275	Actr5	0	0.03	0.01	0.03	0.02	0.01	0	0.02	0.02	0	0	0.01	0.01	0	0.01	0	0	0	0	0	0	0	0.01	0	0	0	0.02	0	0.01	0	0	0	0	0	0	0	0	0	0	0	0	0	0	0	0
67019	Actr6	0.01	0	0	0.01	0	0	0	0	0	0	0	0	0	0	0	0	0.04	0	0	0	0	0	0	0	0	0	0	0.01	0	0	0	0	0	0	0	0	0	0	0	0	0	0	0	0	0
56249	Actr8	0.01	0	0.01	0.01	0.12	0.02	0.01	0.01	0	0	0	0.03	0.01	0	0	0	0	0	0	0	0	0	0	0	0	0	0	0	0	0	0	0	0	0	0	0	0	0	0	0	0	0	0	0	0
76652	Actrt3	0	0	0	0	0	0	0	0	0	0	0	0	0	0	0	0	0	0	0	0	0	0	0	0	0	0	0	0	0.12	0	0	0	0	0	0	0	0	0	0	0	0	0	0	0	0
11477	Acvr1	0	0	0	0	0	0	0	0	0	0	0	0	0	0	0	0	0	0	0	0	0	0	0	0	0	0	0.04	0	0	0	0	0	0	0	0	0	0	0	0	0	0	0	0	0	0
109652	Acy1	0.32	0.32	0.59	0.5	0.95	0.53	0.72	0.75	0.69	0.59	1.16	0.82	0.52	0.61	0.85	0.66	1.02	2.42	2.41	2.38	1.02	2.15	3.49	2.06	4.47	4.73	3.43	3.55	2.7	1.17	4.37	4.4	3.37	5.28	3.44	2.23	6.79	4.11	9.47	2.49	5.08	2.12	4.29	1.75	1.97
71670	Acy3	0.06	0.05	0.03	0.09	0.08	0.03	0.06	0.18	0.15	0.13	0.12	0.22	0.28	0.12	0.24	0.28	0.23	0.1	0.29	0.32	0.23	0.39	0.53	0.29	0.74	0.93	0.48	1.28	1.1	1.41	2.15	2.63	1.06	4.38	3.4	4.61	7.57	6.15	4.44	3.73	7.07	4.03	4.95	6.43	3.63
66204	Acyp1	1.76	1.09	2.47	1.17	1.49	1.74	1.13	1.35	1.66	0.91	1.14	0.72	0.81	1.63	1.78	1.31	1.42	1.75	0.85	1.99	2.15	1.08	1.02	0.83	1.71	1.7	1.23	1.87	1.17	1.46	1.79	1.26	0.78	0.58	1.01	0.4	0.65	1.26	1.02	1.23	0.97	1.07	1.09	0.75	0.96
75572	Acyp2	0	0	0.26	0.02	0.01	0	0	0	0	0	0	0	0.04	0	0	0	0	0	0.16	0	0	0	0.03	0	0	0.6	0	0	0	0	0	0.11	0	0	0.2	0.24	0	0	0	0	0	0	0	0	0
11486	Ada	0.15	0.09	0.27	0.2	0.23	0.13	0.11	0.06	0.08	0.08	0.06	0.06	0.1	0.22	0.04	0.04	0.1	0.09	0.06	0.17	0.09	0.13	0.03	0.37	0.4	0.27	3.99	0.16	0.32	0.33	0.34	0.19	0.16	0.06	0.07	0.01	0.06	0.02	0.01	0.01	0.06	0.1	0.05	0.02	0.05
75894	Adal	0	0	0	0	0.01	0.01	0.02	0	0.02	0	0	0.01	0	0.01	0	0	0.01	0	0	0	0	0	0	0	0	0	0.01	0	0	0.02	0	0	0.01	0.02	0	0	0.02	0	0	0	0	0	0.11	0.01	0
11487	Adam10	0.63	0.77	0.59	0.54	0.61	0.37	0.72	0.48	0.27	0.6	0.65	0.69	0.57	0.54	0.71	0.58	0.26	0.21	0.37	0.17	0.17	0.11	0.22	0.11	0.25	0.85	0.17	0.27	0.36	0.12	0.14	0.12	0.41	0.1	0.07	0.02	0.26	0.08	0.03	0.02	0.03	0	0.05	0.03	0.02
11489	Adam12	0	0	0.01	0	0	0	0	0	0	0	0	0	0	0	0	0	0	0	0	0	0	0	0	0	0	0	0	0	0	0	0	0	0	0	0	0	0	0	0	0	0	0	0	0	0
11490	Adam15	0	0	0	0	0.01	0	0	0	0	0	0	0	0	0	0	0	0	0	0	0	0	0	0	0	0	0	0	0.02	0	0	0	0	0	0	0	0	0	0	0	0	0	0	0	0	0
11491	Adam17	0.01	0.01	0.01	0.01	0.02	0.01	0.02	0.01	0.01	0.01	0.01	0.02	0.02	0.01	0.01	0.01	0.01	0.01	0.01	0	0	0	0.02	0.01	0.02	0.03	0.03	0.01	0	0.03	0.01	0.04	0.02	0.02	0	0.02	0	0	0.02	0	0	0	0.01	0.02	0.01
13524	Adam18	0	0	0	0	0	0	0	0	0	0.02	0	0	0	0	0	0	0	0	0	0	0	0	0	0	0	0	0	0	0	0	0	0	0	0	0	0	0	0	0	0	0	0	0	0	0
23792	Adam23	0	0	0	0	0	0	0	0	0	0	0	0	0	0	0	0	0	0	0	0	0	0	0	0	0	0.04	0	0	0	0	0	0	0.03	0	0	0	0	0	0	0	0	0	0.02	0.03	0
11497	Adam3	0	0	0	0	0	0	0	0	0	0	0	0	0	0	0	0	0	0	0	0	0	0	0	0	0	0	0	0	0	0	0	0	0	0	0	0	0	0	0.01	0	0	0	0	0	0
252866	Adam34	0	0	0	0	0	0	0	0	0	0	0	0	0	0	0	0	0	0	0	0	0	0	0	0	0	0	0	0	0	0	0	0	0	0	0	0	0.01	0	0	0	0	0	0	0	0
11502	Adam9	0.01	0	0	0.01	0	0	0	0	0	0	0	0	0	0	0	0.01	0.01	0	0.01	0	0	0	0.01	0	0.02	0	0	0	0	0	0	0	0	0	0	0	0.14	0	0	0	0	0	0	0	0
269959	Adamtsl3	0	0	0	0	0	0	0	0	0	0	0	0	0	0	0	0	0	0	0	0	0	0	0	0	0	0	0	0	0	0	0	0	0	0	0	0	0	0	0	0	0	0	0.01	0.02	0
66548	Adamtsl5	0	0	0	0	0	0	0	0	0	0	0	0	0	0	0	0	0	0	0	0	0	0	0	0	0.01	0	0	0	0	0	0	0	0	0	0	0	0	0	0	0	0	0	0	0	0
231821	Adap1	0	0	0	0	0	0	0	0	0	0	0	0	0	0	0	0	0	0.01	0	0	0.01	0	0	0	0	0.01	0.01	0	0.01	0	0.01	0	0.01	0	0.01	0	0.01	0	0	0	0.01	0	0	0	0.01
216991	Adap2	0	0	0	0	0	0	0	0	0	0	0	0.01	0	0	0.01	0	0	0.03	0	0.01	0.01	0.01	0.01	0	0	0.01	0.08	0.01	0.01	0	0.02	0.02	0.03	0.05	0.05	0	0.04	0.02	0.01	0.08	0.01	0.07	0.06	0	0.04
56417	Adar	0.01	0	0.01	0	0.01	0	0.01	0	0	0.01	0	0	0	0	0	0	0	0.01	0.01	0	0.02	0	0.01	0	0.01	0.01	0.02	0.01	0	0	0	0.02	0.01	0	0	0	0.01	0	0	0	0	0	0	0	0
110532	Adarb1	0	0	0	0	0	0	0	0	0	0	0	0	0	0	0	0	0	0	0	0	0	0	0	0	0.11	0	0	0	0	0	0	0	0	0	0.02	0	0	0	0	0	0	0	0	0	0.03
94191	Adarb2	0	0	0	0	0	0	0	0	0	0	0	0	0	0	0	0	0	0	0	0	0	0	0	0	0	0	0	0	0.08	0	0	0	0	0	0	0	0	0	0	0	0	0	0	0	0
30947	Adat1	0.01	0	0.01	0	0	0.02	0.01	0	0.03	0	0	0.01	0	0	0	0	0	0	0	0	0	0	0	0	0	0	0	0	0	0	0	0	0	0	0	0	0	0	0	0	0	0	0	0	0
66757	Adat2	0.04	0.12	0.15	0	0.08	0.13	0	0.05	0.03	0.01	0	0.05	0.01	0.07	0	0	0	0.03	0	0	0	0	0	0.02	0	0	0.03	0	0	0	0	0	0	0	0	0	0	0	0.08	0	0	0	0	0	0
72113	Adck1	0.03	0.01	0.05	0	0	0.01	0.02	0.01	0.01	0	0.01	0.01	0.01	0.01	0	0.01	0.01	0.02	0.01	0.04	0	0.01	0.27	0.05	0.03	0.02	0.06	0.19	0.08	0.01	0.05	0.03	0.22	0.16	0.09	0.02	0.05	0.03	0.02	0.08	0.07	0.09	0	0.06	0.01
57869	Adck2	0	0	0	0	0	0	0	0	0	0	0	0	0	0	0	0	0	0	0	0	0	0	0	0	0	0	0.01	0	0.02	0	0	0	0	0	0	0	0	0.03	0.01	0	0	0	0	0	0
268822	Adck5	0	0	0	0	0	0	0	0	0	0	0	0	0	0	0	0	0	0	0	0	0	0	0.01	0.01	0.02	0	0.19	0.02	0.01	0.02	0.05	0.02	0.16	0.15	0.37	0.15	0.36	0.02	0.09	0.08	0.02	0.03	0.49	0.2	0.1
104111	Adcy3	0	0	0	0	0	0	0	0	0	0	0	0	0	0	0	0	0	0	0	0	0	0	0	0	0	0	0	0	0	0	0	0.01	0	0	0	0	0	0	0	0	0	0	0	0	0
104110	Adcy4	0	0	0	0	0	0	0	0	0	0	0	0	0	0	0	0	0	0	0	0	0	0	0	0	0	0	0.03	0	0	0	0	0	0	0	0	0	0	0	0	0	0	0	0	0	0
224129	Adcy5	0	0	0	0	0	0	0	0	0	0	0	0	0	0	0	0	0	0	0	0	0	0	0.01	0	0	0	0	0	0	0	0	0.01	0	0.01	0	0	0	0	0	0	0	0	0	0	0
11512	Adcy6	0	0	0	0	0	0	0	0	0	0	0	0	0	0	0	0	0	0	0	0	0	0	0.01	0	0	0	0	0	0	0	0	0.01	0	0.01	0	0	0	0	0	0	0	0	0	0	0
11513	Adcy7	0	0	0	0	0	0	0	0	0	0	0	0	0	0	0	0	0	0	0	0	0	0	0	0	0	0	0	0	0	0	0	0	0.06	0	0	0	0	0	0	0	0	0	0.08	0	0
11515	Adcy9	0	0	0	0	0	0	0	0	0	0	0	0	0	0	0	0	0	0	0	0	0	0	0	0	0	0	0	0	0	0	0	0	0	0	0.01	0	0	0	0	0	0	0	0.03	0	0
11518	Add1	3.02	3.8	4	2.69	4.75	2.99	2.68	3.93	2.68	2.57	2.67	3.25	2.78	2.43	2.63	3.12	2.82	2.61	1.78	1.18	2.01	0.47	1.96	1.12	1.91	0.88	1.34	0.76	2.56	2.04	0.97	1.47	1.38	0.33	0.89	0.73	0.41	1.06	0.67	0.59	0.26	0.97	0.22	0.32	0.76
11519	Add2	1.17	0.76	2.22	1.44	1.47	1.93	1.68	1.21	1.44	0.86	0.99	1.24	2.06	1.28	0.58	1.15	0.86	0.76	0.39	0.63	0.51	0.29	0.18	0.09	0.02	0.38	0.13	0.12	0.24	0.02	0.03	0	0.03	0	0	0	0	0	0	0	0	0	0	0.02	0
27360	Add3	0.31	0.19	0.91	0.52	0.35	0.84	0.31	0.72	0.5	0.31	0.59	0.71	0.22	0.33	0.57	0.43	0.21	0.72	0.23	0.43	0.97	0.21	0.77	0.71	0.47	0.55	0.48	0.46	0.19	0.22	0.19	0.35	0.52	0.31	0.2	0.11	0.09	0.12	0.03	0.14	0.09	0.15	0.09	0.1	0.08
13733	Adgre1	0	0.01	0	0.03	0.03	0	0.03	0.1	0.06	0.04	0.06	0.16	0.18	0.03	0.1	0.07	0.05	0.1	0.07	0	0.06	0.04	0.04	0.03	0.09	0	0.03	0.2	0.05	0.31	0	0.08	0.54	0.01	0	0	0	0	0	0	0	0.03	0	0	0
26364	Adgre5	0.01	0.01	0	0.01	0.03	0.01	0.01	0.05	0.72	0.03	0	0.03	0.02	0.01	0.03	0.05	0.09	0.01	0	0.1	0.05	0.02	0.03	0.05	0.06	0.1	0.05	0.06	0.02	0.1	0.05	0.06	0.07	0.06	0	0.01	0.09	0	0	0	0	0	0	0	0.01
224792	Adgrf5	0	0	0	0	0	0	0	0	0	0	0	0	0	0	0	0	0	0	0	0	0	0	0	0	0	0	0	0	0	0	0.05	0	0.01	0	0	0	0	0	0	0	0	0	0	0	0
14766	Adgrg1	0.03	0.05	0.02	0.03	0.02	0.07	0.04	0.01	0.01	0.03	0.01	0.01	0.02	0.07	0	0	0.02	0	0.02	0.02	0	0.11	0	0	0	0.01	0.02	0.02	0	0	0	0	0	0	0	0	0	0	0	0	0	0	0	0	0
237175	Adgrg2	0	0	0	0	0	0	0	0	0	0	0.03	0	0	0	0	0	0	0	0	0	0	0	0	0	0	0	0	0	0	0	0	0	0	0	0	0	0	0	0	0	0	0	0	0	0
54672	Adgrg3	0	0	0	0	0	0	0	0	0	0	0	0	0	0	0.01	0	0	0.01	0	0	0.01	0	0	0.01	0	0.01	0.02	0	0	0.01	0.01	0	0	0	0	0	0.02	0	0	0	0	0	0	0	0.03
236798	Adgrg4	0	0	0	0	0	0.01	0	0	0	0.01	0	0	0	0	0	0	0	0	0	0	0	0	0	0	0	0	0	0	0	0	0	0	0	0	0	0	0	0	0	0	0	0	0	0	0
99633	Adgrl2	0	0	0.01	0	0.01	0	0	0	0.01	0	0	0	0	0	0	0	0	0.02	0	0	0.01	0	0	0	0	0	0	0	0.72	0.08	0	0	0	0.01	0.01	0.01	0	0.03	0.05	0.01	0	0	0.07	0	0
319387	Adgrl3	0	0	0	0	0.02	0	0	0	0	0	0	0	0	0	0	0	0	0	0	0	0	0	0	0	0	0	0	0	0	0	0	0	0	0	0	0	0	0	0	0	0	0	0	0	0
170757	Adgrl4	0	0	0	0	0	0	0	0	0	0	0	0	0	0	0	0	0	0	0	0	0	0	0	0	0	0	0.02	0	0	0	0	0	0	0	0	0	0.03	0.02	0	0.01	0	0	0	0	0.06
110789	Adgrv1	0	0	0	0	0.01	0	0	0	0	0	0	0	0	0	0	0	0.01	0	0	0	0	0	0	0	0.03	0	0	0	0	0	0	0	0	0	0	0	0	0	0	0.01	0	0	0	0	0
11522	Adh1	0.01	0.01	0	0.01	0.01	0	0	1.59	0.76	0.22	0.43	1.5	0.17	0.14	10.63	1.87	3.59	92.74	52.76	88.82	82.02	67.55	53.34	60.56	85.23	95.63	113.32	62.65	113.62	160.69	193.31	128.59	134.65	269.25	383.98	689.12	1082.5	1557.79	1345.04	1037.36	1339.57	1147.24	1173.38	1073.75	780.1
26876	Adh4	0	0	0	0	0	0	0	0	0	0	0	0	0	0	0	0	0	0	0	0	0	0	0	0	0	0	0	0	0	0	0	0	0	0	0	0.04	0.06	0.22	0.07	0.4	0.79	0.89	0.68	2.97	2.7
11532	Adh5	2.81	2.67	3.94	2.8	2.92	3.58	3.51	6.29	5.24	5.53	6.21	6.23	4.46	3.4	14.33	11.28	12.52	21.42	36.55	30.23	21.75	31.69	35.05	37.17	69.14	54.98	34.82	44.12	43.39	52.67	67.33	46.42	58.26	63.61	80.2	82.01	63.57	107.44	92.55	82.32	97.8	75.4	78.11	89.79	114.61
69117	Adh6a	0	0	0	0	0	0	0	0	0	0	0	0	0	0	0	0	0	0	0	0	0	0	0	0.09	0	0	0	0	0	0	0	0	0	0	0	0	0	0	0	0	0	0	0	0	0
100417514	Adh6b	0	0	0	0	0	0	0	0	0	0	0	0	0	0	0	0	0	0	0	0	0	0	0	0.08	0	0	0	0	0	0	0	0	0	0	0	0	0	0	0	0	0	0	0	0	0
11529	Adh7	0	0	0	0	0	0.2	0	0	0	0	0	0	0	0	0.03	0	0	1.41	0	0	0.49	0.02	0	0	0.26	0	0	0	0	0	0.78	0	0	0	0.95	0.5	0.14	0	0	0.05	0	0	0.24	0	0.12
76187	Adhfe1	0	0	0	0	0	0	0	0.04	0.01	0.01	0	0.03	0.01	0	0.12	0.02	0.02	0.41	0.21	0.55	0.11	0.5	0.75	0.59	1.12	1.38	0.83	1.92	1.63	1.87	2.52	3.26	2.81	10.06	4.38	4.88	3.79	3.57	3.12	2	2.4	1.82	1.96	2.03	1.61
104923	Adi1	0.46	0.66	1.11	0.41	0.41	0.59	0.68	1.4	1.19	0.69	0.66	1.17	0.79	0.65	1.55	1.99	1.19	2.94	2.25	6.06	2.66	2.02	2.74	2.46	5.99	2.64	2.73	4.21	2.98	5.44	7.48	6.91	6.48	6.06	10.05	5.6	4.02	4.43	4.12	4.43	2.46	4.91	3.01	3.36	3.54
11450	Adipoq	0	0	0	0	0	0	0	0	0	0	0	0	0	0	0	0	0	0	0.02	0	0	0.26	0	0.05	0	0	0	0.03	0.08	0.02	0.26	0	0.02	0.72	0.05	0	0.02	0	0	0	0.15	0	0.08	0.52	0.09
68465	Adipor2	0	0	0	0	0	0	0	0	0	0	0	0	0	0	0	0	0	0	0	0	0	0	0	0	0	0	0	0	0	0	0	0	0	0	0	0	0	0	0	0	0.03	0	0.17	0.02	0.02
11534	Adk	2.72	4.97	6.19	4.82	4.54	5.85	5.19	8.05	9.52	6.49	7.92	12.58	10.14	4.7	18.12	8.94	10.99	31.87	27.78	25.23	32.6	23.14	54.86	36.75	111.25	58.85	45.76	63.05	60.7	62.87	116.2	72.3	66.98	124.34	95.12	122.26	194.08	265.18	210.26	172.15	188.68	109.26	95.23	147.95	161.33
11538	Adnp	0.14	0.16	0.41	0.15	0.28	0.15	0.06	0.19	0.17	0.1	0.09	0.11	0.09	0.08	0.09	0.03	0.1	0.07	0.05	0.05	0.1	0.05	0.07	0.06	0.01	0.07	0.04	0.04	0.08	0.11	0.02	0.03	0.08	0.02	0.05	0.02	0.02	0.05	0.04	0	0	0	0.02	0.02	0
211488	Ado	0.02	0	0.3	0.15	0.19	0.22	0.28	0.11	0.08	0.05	0.06	0.17	0.08	0.14	0.02	0.05	0.02	0.18	0.07	0.09	0.22	0.07	0	0.17	0.13	0.21	0.81	0.01	0.25	0.24	0.04	0.15	0.29	0.31	0.39	0.51	0.48	0.1	0.09	0.1	0.17	0.21	0.26	0.12	0.02
11542	Adora3	0	0	0	0	0	0	0	0	0	0	0	0	0	0	0	0	0	0	0	0	0	0	0	0.13	0	0	0	0	0	0.12	0	0	0	0	0	0	0	0	0	0	0	0	0	0	0
72141	Adpgk	0.19	0.11	0.41	0.24	0.26	0.15	0.32	0.44	0.27	0.45	0.32	0.36	0.22	0.15	0.7	0.35	0.5	1.1	0.68	1.02	0.58	0.35	0.62	0.52	1.04	0.82	0.37	0.53	0.79	0.76	0.79	1.29	0.63	0.98	0.66	0.33	0.36	0.55	0.21	0.68	0.47	0.26	0.24	0.29	0.3
11544	Adprh	0.66	1.71	2.73	0.45	1.16	1.38	0.31	0.86	0.87	0.7	0.85	0.65	0.59	0.6	0.58	0.3	0.55	0.65	0.64	0.44	0.26	0.52	0.88	0.37	0.8	0.63	0.81	0.85	0.95	0.33	0.18	0.23	1.01	0.19	0.34	0.08	0.09	0.09	0.01	0.04	0	0	0.06	0.04	0.24
100206	Adprhl2	0.18	0.31	0.62	0.18	0.22	0.16	0.31	0.4	0.32	0.1	0.17	0.35	0.28	0.23	0.23	0.13	0.02	0.58	0.54	0.43	0.78	0.48	1.23	0.87	1.01	1.59	1.24	1.69	0.4	1.43	0.78	2.54	1.98	2.59	2.28	1	0.23	1.08	1.15	0.08	0	0.22	0.39	0.31	0.47
66358	Adprm	0	0	0.17	0.01	0	0.01	0	0	0.01	0	0.02	0.03	0	0	0.02	0	0.01	0	0	0	0	0	0.16	0.02	0.01	0	0.05	0.04	0.02	0	0.06	0	0.04	0.07	0.05	0.08	0.06	0.03	0.06	0	0.01	0.02	0.04	0.06	0.08
11552	Adra2b	0	0	0	0	0	0	0	0	0	0	0	0	0	0.01	0	0	0	0	0	0	0	0	0	0	0	0	0	0	0	0	0	0	0	0	0	0	0	0	0	0	0	0	0	0	0
56436	Adrm1	0.62	0.44	1.75	0.7	0.87	1.18	0.63	1.04	1.03	0.32	0.73	1.34	0.29	0.7	0.87	0.47	0.42	1.19	0.41	1.05	0.99	0.3	0.98	0.92	0.81	0.34	1.52	0.56	1.2	1.44	0.61	1.07	1.84	1.06	0.67	2.42	0.62	3.15	2.41	0.58	1.23	1.04	2.47	2.52	3.19
11564	Adsl	0.78	1.61	2.69	1.85	1.41	1.56	1.24	1.8	1.87	1	0.79	1.37	0.73	0.6	1.16	1.19	0.88	1.62	1.03	1.17	1.54	0.96	1.86	1.46	1.32	0.89	1.22	1.5	1.39	2.03	3.17	1.69	1.42	1.28	1.26	2.13	1.4	2.56	2.21	1.68	1.66	0.96	1.3	1.38	1.3
11566	Adss	1.19	0.6	3.21	1.54	2.07	1.43	0.86	1.48	1.63	0.48	0.28	1.11	0.82	1.2	0.94	0.79	1.19	1.22	0.73	0.71	0.64	0.51	0.75	0.82	1.36	1.08	0.78	1.26	1.1	1.52	0.6	1.09	0.65	0.49	0.19	1.55	0.39	1.66	1.34	0.4	0.57	0.35	0.98	1.22	1.05
11565	Adssl1	0.05	0.01	0.02	0.02	0.08	0.04	0.11	0.16	0.13	0.03	0.08	1.18	0.28	0.01	0.13	0.01	0.09	0.23	0.1	0.31	0.62	0.05	0.16	0.14	0.12	0.43	0.43	0.11	0.4	0.12	0.06	0.61	0.33	0.2	0.77	0.18	0.63	1.21	0.91	0.71	0.41	0.17	0.35	0.46	0.78
109254	Adtrp	0	0	0	0	0	0	0	0	0	0	0	0	0	0	0	0	0	0	0	0	0	0	0	0	0	0	0.05	0	0	0	0	0	0.15	0	0.04	0	0.02	0.03	0.03	0	0	0	0	0.01	0.18
11568	Aebp1	0	0	0	0	0	0	0.04	0.01	0.02	0	0	0	0	0	0	0	0.01	0.72	0	0	0	0.01	0	0.01	0.01	0	0.52	0.02	0	0	0	0	0.72	0	0	0	0	0	0	0	0	0	0	0	0
11569	Aebp2	0	0.01	0.02	0.01	0	0.03	0.01	0.01	0.01	0	0.01	0.01	0.02	0	0.01	0	0.02	0	0	0	0	0	0	0.02	0.01	0	0	0	0.01	0.03	0	0.01	0.02	0.01	0	0	0	0	0.03	0	0	0	0	0	0
68048	Aen	0	0.02	0	0	0.02	0	0	0	0	0	0	0	0	0	0	0	0	0	0	0	0	0	0	0	0	0	0	0	0	0	0	0	0	0	0	0	0	0	0	0	0	0	0	0	0
70292	Afap1	0	0	0	0	0	0	0	0.01	0	0	0	0	0	0	0	0	0	0	0	0	0	0	0	0	0	0	0	0	0	0	0	0	0	0	0	0	0	0	0	0	0	0	0	0	0
106877	Afap1l1	0	0	0	0	0	0	0	0	0	0	0	0	0	0	0	0	0	0	0	0	0	0	0	0	0	0	0	0	0	0	0	0	0	0	0	0	0.03	0	0	0	0	0	0	0	0
226250	Afap1l2	0	0	0	0	0	0	0	0	0	0	0	0	0	0	0	0	0	0	0	0	0	0	0	0.01	0	0	0	0	0	0	0	0	0.01	0	0	0	0	0	0	0	0	0	0	0	0
17356	Afdn	0.02	0.28	0.07	0.03	0.08	0.04	0.01	0.04	0.05	0.02	0.01	0.04	0.01	0.01	0.03	0.02	0.03	0.08	0.03	1.27	0.08	0.03	0.22	0.09	0.15	0.18	0.13	0.09	0.11	0.3	0.12	0.26	0.15	0.17	0.14	0.09	0.13	0.1	0.09	0.12	0.21	0.21	0.18	0.21	0.2
17355	Aff1	0	0	0	0	0	0	0	0	0	0	0	0	0	0	0	0	0	0	0	0	0	0	0	0	0	0	0	0	0	0	0	0	0	0	0	0	0	0	0	0.06	0	0	0	0	0
215951	Afg1l	0	0	0	0	0	0	0	0	0	0	0	0	0	0	0	0	0	0	0	0.11	0.02	0	0	0	0	0	0.02	0	0.02	0	0	0	0.01	0	0.08	0.01	0	0	0.03	0.12	0	0.08	0.04	0.15	0.45
114896	Afg3l1	0.01	0.02	0.1	0.01	0.04	0.04	0.02	0.06	0.03	0.01	0.01	0.03	0.04	0.02	0.02	0.02	0	0.04	0.02	0.04	0.16	0.02	0.02	0.03	0.13	0.02	0.51	0.08	0.22	0.15	0.13	0.1	0.19	0.28	0.22	0.19	0.1	0.73	0.09	0.08	0.03	0.04	0.13	0.04	0.24
69597	Afg3l2	0.16	0.12	0.42	0.16	0.34	0.35	0.18	0.38	0.29	0.14	0.18	0.29	0.14	0.23	0.23	0.16	0.27	0.28	0.59	0.33	0.28	0.19	0.33	0.73	1.04	1.35	0.82	1.1	1.06	0.94	1.17	1.14	1.01	0.86	1.33	1.1	0.53	1.05	0.82	0.9	0.9	1.22	0.8	1.12	1.19
280662	Afm	0	0	0	0	0	0	0	0	0	0	0	0	0	0	0	0	0	0	0	0	0	0	0	0.01	0.02	0	0.02	0.06	0.02	0.1	0.15	0.03	0.07	0.06	0.12	0.12	0.05	0.03	0.06	0.05	0.19	0.18	0.69	0.12	0.07
71562	Afmid	0	0	0	0	0	0	0	0.02	0.03	0	0.03	0.1	0.01	0.01	0.01	0.01	0	0.1	0.12	0.3	0.21	0.11	0.32	0.39	0.57	0.72	0.77	0.82	1.42	0.89	3.11	2.4	1.09	3.56	6.28	3.06	6.66	2.28	4.99	4.77	1.59	6.63	1.66	1.56	1.5
11576	Afp	92.74	103.1	65.34	59.93	78.48	89.28	52.43	115.15	110.12	112.04	71.52	131.95	43.09	31.89	230.09	126.24	202.27	273.15	160.37	120.77	114.32	100.64	103.55	76.29	64.87	81.9	52.44	139.2	72.24	98.91	42.95	54.21	58.36	2.32	2.03	0.04	0	0	0	0	0	0.13	0	0	0
216549	Aftph	0.04	0.04	0.04	0.01	0.01	0.54	0.01	0.01	0.01	0.02	0	0.04	0.02	0.01	0.01	0.01	0.02	0.02	0.02	0.01	0.01	0	0.01	0	0.05	0.04	0.02	0.02	0	0.01	0.04	0.03	0.02	0.03	1.32	0	0.04	0.01	0	0.03	0	0.01	0	0	0.02
11593	Aga	0.05	0.38	0.23	0.03	0	0.06	0.34	0.04	0.05	0.13	0.25	0.03	0.63	0.43	0.29	0.13	0.1	0.13	0.19	0.68	0.04	0.24	1.04	0.23	0.7	0.7	0.43	0.63	0.25	0.42	1.29	0.95	1.03	0.66	0.63	0.6	0.37	0.41	0.02	0.11	0.1	0.46	0.04	0.07	0.09
347722	Agap1	0	0	0	0	0.02	0.02	0.02	0	0.01	0	0.01	0	0	0	0.05	0.01	0.01	0	0	0	0	0	0	0	0	0.01	0	0	0	0	0.05	0	0	0	0	0	0	0	0	0	0	0	0	0	0
213990	Agap3	0	0	0	0	0	0.01	0	0	0.01	0	0	0	0	0	0.09	0	0	0	0	0.01	0	0	0	0	0	0	0.14	0	0	0	0	0.04	0	0	0	0	0	0.01	0.01	0	0.01	0	0	0	0
15463	Agfg1	0.43	0.45	1.41	0.5	1.02	0.72	0.44	0.5	0.57	0.45	0.58	0.65	0.34	0.24	0.25	0.2	0.21	0.36	0.6	0.44	0.26	0.17	0.19	0.39	0.17	0.24	0.51	0.2	0.27	0.24	0.23	0.17	0.39	0.12	0.42	0.4	0.19	0.37	0.25	0.22	0.12	0.16	0.09	0.14	0.1
231801	Agfg2	0.12	0.13	0.11	0.06	0.08	0.17	0.11	0.22	0.15	0.2	0.14	0.24	0.11	0.04	0.06	0.06	0.04	0.18	0.13	0.17	0.32	0.08	0.39	0.27	0.16	0.06	0.17	0.42	0.01	0.38	0.59	0.31	0.21	0.67	0.17	0.21	0.49	0.18	0.09	0.19	0	0.01	0.19	0.06	0.1
69923	Agk	0.04	0.13	0.09	0.12	0.05	0.07	0.27	0.04	0.14	0.1	0.14	0.29	0.06	0.19	0.19	0.03	0.14	0.5	0.06	0.49	0.16	0.11	0.84	0.33	0.29	2.21	0.28	1.34	2.21	2.27	0.71	2.36	0.68	1.77	1.55	1.52	0.87	0.37	0.85	0.36	1.3	0.26	0.2	0.23	0.64
77559	Agl	0.02	0.1	0.12	0.05	0.12	0.06	0.44	0.17	0.21	0.29	0.13	0.3	0.08	0.12	0.56	0.29	0.44	1.33	1.39	1.2	0.59	1.03	1.03	1.14	1.63	1.92	1.56	1.75	2.22	1.83	2.64	1.93	2.12	2.02	2.92	3.29	3.97	5.82	4.7	6.8	5.11	4.29	4.63	5.77	6.64
75986	Agmat	0.02	0.02	0.05	0.08	0.03	0.03	0.04	0.09	0.11	0.07	0.08	0.19	0.09	0.05	0.22	0.18	0.08	0.54	0.5	0.43	0.22	0.49	0.74	1.74	2.96	2.39	2.37	3.17	4.5	2.44	5	2.89	4.64	10.22	13.82	5.37	9.39	5.52	5.32	7.5	8.43	10.79	2.88	11.31	4.05
319660	Agmo	0	0	0	0	0.12	0	0.02	0	0.06	0	0.05	0.01	0.03	0	0	0.02	0	0	0	0.03	0.03	0.02	0.31	0.4	0.16	0.39	1.03	0.48	0.16	0.79	1.77	0.51	0.82	1.02	0.55	0.38	0.35	0.95	0.57	0.7	0.18	0.46	0.83	0.87	0.27
236511	Ago1	0.01	0.01	0.01	0.02	0.01	0.04	0.01	0.03	0.03	0	0.01	0.06	0.01	0.03	0.04	0.01	0.01	0.07	0.01	0.05	0.05	0.02	0.02	0.01	0.04	0.01	0.06	0.06	0.02	0.51	0.01	0.02	0.09	0.02	0.09	0.04	0.03	0.01	0.05	0.06	0	0.04	0.06	0.05	0.02
239528	Ago2	0.12	0.23	0.21	0.4	0.38	0.32	0.22	0.25	0.36	0.14	0.32	0.46	0.15	0.39	0.43	0.23	0.16	0.43	0.21	0.41	0.4	0.13	0.37	0.14	0.23	0.29	0.42	0.1	0.33	0.33	0.6	0.36	0.4	0.24	0.45	0.34	0.14	0.15	0.19	0.19	0	0.06	0.1	0.13	0.11
214150	Ago3	0.01	0.01	0.01	0.01	0.01	0.02	0.01	0.01	0.01	0	0.01	0.03	0.01	0.01	0.02	0.01	0.01	0.02	0.02	0.02	0.02	0.02	0.02	0.01	0.03	0.01	0.04	0.03	0.01	0.03	0.01	0.02	0.03	0.02	0.02	0.01	0.01	0.01	0.04	0.03	0	0.04	0.02	0.02	0.01
76850	Ago4	0	0.01	0	0.01	0.01	0.01	0.01	0.01	0	0	0.01	0.02	0.01	0.01	0.01	0	0.01	0.01	0	0.01	0.01	0.01	0.02	0.01	0.02	0.01	0.02	0.02	0.01	0.01	0.01	0.02	0.01	0.02	0.01	0.01	0.01	0.01	0.04	0.02	0	0.04	0.01	0.02	0
55979	Agpat1	0.2	0.02	0.05	0.03	0.01	0.01	0	0	0	0.01	0.01	0	0.01	0	0	0	0	0	0	0	0	0	0	0	0	0.06	0.07	0.01	0	0	0	0	0.08	0.01	0	0	0	0	0	0	0	0	0.35	0.08	0
67512	Agpat2	0	0	0.01	0.02	0.02	0.01	0.1	0.06	0.05	0.03	0.14	0.04	0.04	0.03	0.1	0.08	0.28	0.13	0.79	0.72	0.08	0.54	0.85	0.43	1.24	1.05	0.99	1.61	1.12	5.4	1.87	7.11	2.5	2.61	1.63	5.42	4.42	7.64	5.83	3.56	2.78	1.07	1.96	2.61	3.14
28169	Agpat3	0	0	0.1	0.03	0.07	0	0.02	0.26	0.1	0.15	0.08	0.01	0.1	0.02	0.16	0.26	0.28	0.5	0.73	0.7	0.33	0.52	1.14	1.21	3.06	2.56	3.37	3.56	6.14	5.01	3.84	7.94	5.02	2.24	2.13	7.25	1.21	1.28	1.17	0.97	1.05	0.92	0.88	0.86	0.87
68262	Agpat4	0.02	0.03	0.01	0.01	0.02	0	0.01	0	0	0	0.01	0.17	0.01	0.04	0	0	0	0	0.01	0	0	0	0	0	0	0	0	0.12	0	0	0	0	0	0	0	0	0	0	0	0	0	0	0	0	0
52123	Agpat5	0.04	0.1	0.09	0	0.04	0.08	0	0.01	0	0.02	0.16	0.01	0.03	0.07	0.01	0.03	0.02	0.01	0	0	0.06	0.03	0.11	0.05	0.05	0.03	0.68	0	0.01	0.05	0	0.05	0.03	0.01	0.02	0	0.01	0	0	0	0	0.01	0.01	0.19	0.02
228061	Agps	0.16	0.28	0.32	0.18	0.24	0.25	0.22	0.37	0.27	0.12	0.19	0.32	0.2	0.07	0.22	0.15	0.17	0.36	0.15	0.36	0.18	0.08	0.11	0.08	0.29	0.23	0.38	0.13	0.13	0.4	0.09	0.39	0.24	0.04	0.02	0.15	0.02	0.05	0.03	0.01	0	0	0.01	0.02	0
11603	Agrn	0	0.01	0.01	0	0.02	0.06	0	0	0.01	0	0	0	0	0	0	0	0	0	0.02	0.04	0	0	0	0	0	0	0.1	0.01	0	0	0	0	0.01	0.01	0.01	0	0	0.05	0.01	0	0.01	0.46	0.01	0.02	0
11606	Agt	0.01	0.02	0	0.05	0.03	0.03	0.06	0.18	0.18	0.12	0.05	0.35	0	0	0.32	0.15	0.31	0.47	0.35	0.4	0.33	0.49	0.91	0.35	2.26	3.82	1.24	4.11	1.67	2.76	3.53	3.6	3.26	2.98	1.45	0.86	1.42	0.38	0.34	0.36	0.47	0.27	0.4	0.14	0.12
11607	Agtr1a	0	0	0	0	0	0	0	0	0	0	0	0	0	0	0	0	0	0	0.09	0	0	0	0	0.01	0	0	0	0	0	0	0	0	0	0	0.02	0	0	0	0	0	0	0	0	0.01	0
11608	Agtr1b	0	0	0	0	0	0	0	0	0	0	0	0	0	0	0	0	0	0	0.11	0	0	0	0	0.01	0	0	0	0	0	0	0	0	0	0	0.02	0	0	0	0	0	0	0	0	0.01	0
11610	Agtrap	0	0	0	0	0	0	0	0	0	0	0	0	0	0	0.01	0	0	0	0	0	0	0	0	0	0	0	0	0	0	0	0	0	0	0	0	0	0	0	0	0	0	0	0	0	0
11611	Agxt	0	0	0	0.01	0	0	0	0.28	0.03	0.04	0.04	0.05	0.02	0.02	0.83	0.02	0.18	1.86	1.09	2.35	0.7	2.94	5.74	3.51	25.41	21.13	19.96	36.67	31.68	40.56	47.7	43.27	35.39	144.25	94.36	55.59	64.86	62.42	44.41	43.65	29.31	20.64	14	17.61	14.06
268782	Agxt2	0	0.11	0.01	0.05	0.08	0	0.17	0.37	0.25	0.31	0.35	0.21	0.41	0.2	0.79	0.59	0.39	2.11	1.38	1.57	0.9	1.14	2.74	1.76	3.6	3.84	2.58	7.22	9.44	9.28	13.23	11.07	11.16	21.32	23.5	14.68	15.79	15.91	12.67	13.62	13.35	13.34	11.49	11.91	11.36
226747	Ahctf1	0.11	0.12	0.34	0.2	0.1	0.03	0.16	0.07	0.03	0.08	0.1	0.04	0.07	0.09	0.05	0.05	0.03	0.04	0.05	0.01	0.02	0.02	0.04	0.02	0.04	0.07	0.05	0.06	0.03	0.06	0.08	0.07	0.11	0.04	0.05	0.03	0.01	0.01	0.01	0	0	0.02	0.02	0.04	0
269378	Ahcy	7.56	6.34	10.75	8.08	9.24	9.77	6.1	16.23	12.11	9.04	7.33	16.21	9.81	8	26.88	19.1	14.47	56.57	36.16	48.63	56.45	48.71	142.43	127.43	239.38	123.88	124.92	85.44	94.06	107.73	204.89	125.63	121.26	207.92	214.92	159.61	342.68	430.3	418.48	489.44	543.25	441.31	369.39	528.24	541.45
229709	Ahcyl1	0.48	0.6	13.35	39.35	30.88	24.47	28.33	21.98	20.4	34.6	0.56	1.08	0.5	0.47	0.97	37.25	0.73	2.76	6.24	26.54	9.06	2.49	60.32	13.18	98.75	3.08	17.93	35.94	1.95	1.96	5.67	43.02	60.64	5.81	29.88	28.91	6.25	29.46	33.48	47.09	8.06	11.93	20.84	8.88	37.2
74340	Ahcyl2	0.33	0.5	0.62	0.6	0.56	0.44	0.51	0.69	0.56	0.5	0.43	0.57	0.36	0.36	0.62	0.63	0.59	1.62	1.29	1.25	0.99	1.34	3.19	2.27	4.33	2.83	1.48	3.75	1.62	1.63	5.08	3.21	2.29	3.58	2.93	3.69	5.65	4.27	5.54	6.42	7.35	4.7	3.98	7.86	5.04
230793	Ahdc1	0	0	0	0	0	0	0	0	0.08	0	0	0	0	0	0	0	0	0.08	0	0	0	0	0	0	0	0	0	0	0	0	0	0	0	0	0	0	0	0	0	0	0	0	0	0	0
52906	Ahi1	0	0	0	0	0	0	0	0	0.01	0	0	0	0	0	0	0	0	0	0	0	0	0	0	0	0	0	0	0	0	0	0	0	0	0	0	0	0	0	0	0	0	0	0	0	0
66395	Ahnak	0.15	0.19	0.28	0.13	0.12	0.17	0.07	0.23	0.18	0.16	0.09	0.1	0.13	0.05	0.24	0.18	0.18	0.58	0.49	0.43	0.57	0.61	0.45	0.66	0.51	0.56	0.57	0.38	0.52	0.79	0.37	0.69	0.81	0.53	0.53	0.49	0.26	0.23	0.41	0.21	0.35	0.18	0.44	0.22	0.07
11622	Ahr	0	0	0	0	0	0	0	0.01	0	0	0	0.01	0.03	0	0	0	0	0.01	0	0	0.02	0	0	0.03	0	0	0.01	0.02	0	0.01	0.01	0	0	0	0.02	0	0	0	0	0	0	0	0	0	0
217737	Ahsa1	8.55	7.45	11.18	4.78	5.04	6.36	5.23	5.23	3.9	4.01	3.54	3.14	5.08	3.87	2.88	3.75	3.45	3.39	5.13	3.73	3.75	5.27	5.9	1.51	5.83	8.32	4.46	8.39	3.1	3.41	3.98	7.91	4.26	3.26	3.21	5.58	4.06	3.41	3.49	2.54	3.59	3.39	4.63	1.97	2.53
268390	Ahsa2	0.02	0.12	0.32	0.27	0.19	0.07	0.02	0.14	0.06	0.09	0.14	0.08	0.02	0.1	0.51	0	0.02	0.16	0.06	0.05	0	0.01	0.06	0.02	0.15	0	0.03	0.04	0	0.08	0.04	0	0.28	0.42	0.1	0	0.05	0.13	0.1	0	0.02	0.06	0.15	0.15	0.07
11625	Ahsg	0.03	0.13	0	0	0.25	0.07	0.5	2.56	3.09	1.52	1.06	5.15	0.39	0.32	9.5	3.41	4.49	39.11	12.6	11.42	12.68	10.58	21.28	15.97	19.8	21.41	15.97	38.22	30.24	41.56	32.71	38.21	35.23	36.92	33.87	27.81	13.78	11.77	14.52	6.61	10.28	17.88	2.07	4.25	6.1
170812	Ahsp	23.18	21.36	23.97	24.86	32.69	39.39	46.9	32.94	35.32	26.48	20.69	38.59	19.93	21.6	46.03	23.18	15.53	35.15	10	14.24	13.63	7.54	6.51	4.59	5.35	5.68	2.23	10.68	2.28	4.19	2.57	1.83	0.9	0	0.09	0	0	0	0	0	0	0	0	0	0
98870	AI182371	0	0	0	0	0	0	0	0	0	0.01	0	0	0	0	0.01	0	0	0.01	0.03	0	0	0.01	0	0	0.09	0	0.13	0.01	0	0.11	0	0.17	0.03	0.02	0	0	0.12	0.11	0.09	0.04	0.04	0.03	0.36	0.03	1.84
106672	AI413582	0.01	0	0	0	0	0	0	0	0	0	0	0	0	0	0	0	0	0	0	0	0	0	0	0	0	0	0	0	0	0	0	0	0	0	0	0	0	0	0	0	0	0	0	0	0
98404	AI597479	0.02	0	0.02	0.02	0.02	0	0.01	0.01	0	0	0	0.01	0	0	0.01	0	0	0.01	0	0	0	0	0	0	0	0	0	0	0	0	0	0	0	0	0	0	0	0	0	0	0	0	0	0	0
224833	AI661453	0	0	0	0	0	0	0	0	0	0	0	0	0	0	0	0	0	0.11	0	0	0.12	0	0	0	0	0	0.01	0	0.15	0	0.02	0	0.02	0	0	0.01	0	0	0.01	0	0	0.03	0.09	0.02	0.1
107242	AI837181	0.1	0.05	0.1	0.07	0.17	0.19	0.09	0.12	0.09	0.2	0.07	0.14	0.11	0.05	0.08	0.12	0.14	0.22	0.16	0.16	0.09	0.18	0.09	0.13	0.28	0.36	0.14	0.2	0.2	0.18	0.17	0.22	0.33	0.66	0.39	0.27	0.52	0.09	0.12	0.13	0.08	0.21	0.13	0.1	0.12
11628	Aicda	0	0	0	0	0	0	0	0	0	0	0	0	0	0	0	0	0	0	0	0	0	0	0	0	0.15	0	0	0	0	0	0	0	0	0	0	0	0	0	0	0	0	0	0	0	0
108909	Aida	0.03	0	0	0	0	0	0.02	0	0.01	0	0	0	0.05	0	0	0	0	0	0	0	0	0	0	0	0	0	0	0	0	0	0	0	0	0	0	0	0	0	0	0	0	0	0	0	0
11629	Aif1	0.01	0.15	0.23	0.1	0	0.19	0.04	0.18	0.35	0.39	0.36	0.25	0.27	0.22	0.25	0.26	0.05	0.09	1.34	0.48	0.08	0.19	1.07	0.52	1.36	1.24	1.47	3.42	0.58	4.59	1	5.79	3.08	1.35	2.36	0.08	0.77	0.6	0.18	0.31	0.09	0.41	0.17	0.67	0.15
108897	Aif1l	0	0	0	0	0	0.01	0	0	0	0	0	0	0	0	0	0	0	0	0	0	0	0	0	0	0	0	0	0	0	0	0	0	0	0	0	0	0	0	0	0	0	0	0	0	0
26926	Aifm1	1.13	0.78	1.45	1.02	1.18	1.13	1.11	1.9	1.98	1.3	1.02	2.01	1.65	1.19	2.67	1.95	1.5	5.27	4.43	4.23	3.47	3.8	5.71	4	9.32	6.52	11.04	6.46	8.73	9.55	16.1	12.96	10.69	17.75	14.89	21.81	20.14	26.26	27.18	16.34	16.61	12.7	17.49	13.96	15.01
71361	Aifm2	0	0	0	0	0	0	0	0.03	0.01	0.01	0	0.01	0	0	0.25	0.07	0.02	0.07	0.07	0.14	0.02	0.04	0.05	0.07	0.2	0.17	0.54	0.07	0.78	0.11	0.54	0.23	1.37	0.13	1.47	1.21	0.14	0.67	0.05	0.01	0.34	0.99	0.2	0.48	0.72
72168	Aifm3	0	0	0	0	0	0	0	0	0	0	0	0	0	0	0	0	0	0	0	0	0	0	0	0	0	0	0	0	0	0	0	0	0	0.05	0	0	0	0	0	0	0	0	0	0	0
383619	Aim2	0	0	0	0	0	0	0	0	0	0	0	0	0	0	0	0	0	0	0	0.01	0	0	0	0	0	0	0	0	0	0	0	0	0	0	0	0	0	0	0	0	0	0	0	0	0
13722	Aimp1	1.96	1.39	3.59	1.06	2.62	2.35	1.66	2.23	2.42	0.97	1.15	2.27	1.15	1.14	1.57	0.59	0.59	2.16	1.11	1.34	2.29	1.1	2.12	2.32	1.88	2.14	2.8	1.5	3.08	2.06	0.58	2.38	3.48	2.34	2.81	2.01	0.91	1.72	1.52	1.41	1.91	1.78	1.42	1.24	1.37
231872	Aimp2	0.44	0.69	2.44	0.71	1.13	0.58	0.57	0.66	0.93	0.51	0.4	1.02	0.82	0.45	0.8	0.32	0.77	1.01	0.44	0.46	1.2	0.41	0.38	0.42	0.95	0.96	0.76	0.44	0.78	0.58	0.37	0.37	1.39	0.64	0.42	0.82	0.6	0.14	0.78	0.32	0.56	0.16	0.66	0.59	0.95
11632	Aip	0.35	0.24	1.19	0.65	0.79	0.36	0.45	0.61	0.67	0.1	0.47	0.26	0.25	0.38	0.42	0.22	0.17	0.52	0.24	0.59	0.44	0.17	0.19	0.15	0.35	0.56	0.3	0.39	0.63	0.7	0.33	0.84	1.1	0.25	0.56	0.98	0.44	0.42	0.53	0.09	0.61	0.65	0.37	0.15	0.16
11636	Ak1	0.2	0	0	0.02	0	0	0.01	0.03	0	0	0	0.07	0	0	0	0.03	0	0	0	0	0	0	0	0.05	0	0	0	0	0	0.12	0	0	0	0	0.14	0	0	0	0	0	0	0.09	0	0	0
11637	Ak2	10.3	5.23	9.4	5.34	9.1	8.84	3.9	7.84	8.03	4.85	8.57	7.3	9.95	7.21	6.75	4.86	5.15	11.89	13.76	7.38	6.18	21.48	17.14	31.25	67.3	43.07	37.08	63.49	61.69	95.54	71.29	67.32	94.99	127.86	138.19	209.54	103.07	110.47	110.72	126.94	100.85	122.17	43.65	105.5	107.05
56248	Ak3	0.71	0.74	1.24	0.5	0.59	0.89	0.96	1.67	1.04	1.36	0.55	1.65	0.95	0.79	2.59	1.24	1.34	7.71	5.23	3	2.99	4.41	4.15	5.19	5.57	10.82	7.09	7.61	9.11	10.14	13.1	15.53	11.67	21.86	18.69	19.54	21.52	30.4	26.36	32.56	44.52	45.53	29.33	35.98	40
11639	Ak4	1.88	0.17	1.36	2.44	1.09	1.04	0.94	1.56	2.09	2.34	1.07	4.38	0.43	0.72	3.86	2.28	2.68	3.71	3.37	3.59	6.9	1.95	2.94	8.35	6.79	6.85	6.93	7.64	8.47	3.4	8.68	9.72	6.06	5.38	6.76	3.52	2.32	1.42	2.07	9.76	6.72	5.68	3.43	4.58	4.82
11640	Akap1	0.04	0	0.04	0.07	0.03	0.01	0.02	0.02	0.03	0.02	0.01	0.21	0.03	0.03	0.26	0.01	0.05	0.48	0.17	0.08	0.5	0.1	0.09	0.18	0.4	0.44	0.2	0.2	0.22	0.23	0.17	0.2	0.31	0.28	0.27	0.24	0.16	0.32	0.26	0.2	0.28	0.15	0.31	0.34	0.31
56697	Akap10	0.02	0	0.14	0	0.04	0.02	0.01	0	0.05	0	0.01	0.02	0.05	0.01	0	0.01	0.03	0.01	0	0	0	0	0.01	0.01	0.07	0.06	0.08	0	0.04	0	0	0.08	0.01	0.02	0.01	0	0	0	0	0	0	0	0	0	0
219181	Akap11	0.01	0	0	0	0	0	0	0	0	0	0	0	0	0	0	0	0	0	0	0	0	0	0	0	0	0	0	0	0	0	0	0	0	0	0	0	0	0	0	0	0	0	0	0	0
83397	Akap12	0.12	0.1	0.18	0.11	0.07	0.19	0.17	0.07	0.16	0.09	0.15	0.09	0.01	0.1	0.09	0.12	0.14	0.15	0.03	0.09	0.1	0.1	0.15	0.14	0.24	0.18	0.1	0.15	0.23	0.03	0.16	0.24	0.09	0.06	0.21	0.02	0.09	0.03	0.03	0	0	0	0.01	0.01	0
75547	Akap13	0	0	0.01	0.02	0.02	0.05	0.02	0.04	0.07	0	0.02	0.07	0	0	0.01	0	0.01	0.01	0	0	0.09	0	0	0.01	0	0.04	0.02	0.01	0.01	0	0	0.01	0.02	0.03	0.01	0.02	0.01	0.04	0.05	0	0	0.01	0.01	0.01	0
238276	Akap5	0.02	0	0	0	0	0	0	0	0	0	0.01	0	0	0	0	0	0	0	0	0	0	0.07	0	0	0	0	0	0	0	0.11	0	0	0	0	0	0	0	0	0	0	0	0	0	0	0
238161	Akap6	0	0	0.02	0	0	0	0	0	0	0	0	0	0	0	0.03	0	0	0.05	0	0	0	0	0	0	0	0	0	0	0	0	0	0	0	0	0	0	0	0.01	0.01	0	0	0	0	0	0
432442	Akap7	0	0	0	0	0	0	0	0	0	0	0	0	0	0	0	0	0	0	0.3	0	0	0	0	0	0	0	0	0	0	0	0	0	0	0	0	0	0	0	0	0	0	0	0	0	0.22
56399	Akap8	0.21	0.17	0.68	0.49	0.25	0.45	0.37	0.21	0.12	0.09	0.11	0.12	0.14	0.04	0.24	0.14	0.02	0.5	0.05	0.34	0.14	0.02	0.04	0.12	0.13	0.1	0.11	0.05	0.03	0.04	0.06	0.04	0.19	0.04	0.13	0.19	0.01	0.1	0.04	0.01	0.03	0.03	0.02	0.03	0.02
54194	Akap8l	0.01	0.03	0.02	0	0.06	0.06	0.08	0.01	0.01	0.04	0.06	0.08	0.01	0.01	0.01	0.04	0.01	0.01	0.02	0.01	0.01	0	0.05	0.02	0.01	0	0.02	0	0	0	0	0	0	0	0.01	0.02	0.01	0	0.03	0	0.02	0	0	0	0.02
100986	Akap9	0.01	0.02	0.02	0	0.01	0.02	0.01	0	0.01	0.01	0	0.01	0	0	0	0.01	0	0.03	0.02	0.01	0	0.01	0.03	0.02	0.12	0.01	0.01	0.01	0.01	0.11	0	0.02	0.01	0.01	0.01	0.01	0	0	0	0	0	0	0	0	0
633979	Akd1	0	0	0	0	0	0	0	0	0	0	0	0.01	0	0	0	0	0	0	0	0	0.02	0	0	0	0	0	0	0	0	0.01	0	0	0	0	0	0	0	0	0	0	0	0	0	0	0
68050	Akirin1	0	0.02	0.03	0.01	0.02	0	0.01	0.01	0.01	0.01	0.01	0.01	0	0.01	0	0	0	0.01	0.01	0	0	0	0.01	0	0	0	0.01	0	0	0	0	0	0	0	0	0	0	0	0	0	0	0	0	0	0
433693	Akirin2	0	0.02	0.03	0.01	0.02	0.47	0.01	0.01	0.01	0.01	0.01	0.01	0	0.01	0	0	0	0.01	0.01	0	0	0	0.01	0	0	0	0	0	0	0	0	0	0	0	0	0	0	0	0	0	0	0	0	0	0
58810	Akr1a1	1.84	2.18	2.38	1.74	1.3	2.2	1.9	3.47	3.06	4.81	1.96	3.72	3.73	2.16	4.85	4.78	6.56	7.06	15.07	12.26	7.68	11.24	13.98	8.75	22.38	20.53	14.23	34.61	14.97	20.11	46.85	32.48	30.41	23.19	28.86	40.76	43.24	48.54	31.69	55.48	39.84	38.17	32.27	38.54	45.03
67861	Akr1b10	0.05	0	0.28	0.15	0.08	0.14	0.11	0.29	0.32	0.11	0.22	0.35	0.14	0.23	0.53	0.07	0.09	1.08	2.22	6.34	1.25	3.18	5.93	3.55	8.54	3.98	5.1	5.99	4.7	6.61	8.61	7.25	6.9	4.16	6.04	1.01	1	0.83	0.7	0.03	0.02	0.1	0.03	0.02	0.17
11677	Akr1b3	2.71	3.09	6.31	2.08	4.02	3.01	2.41	2.03	3.06	1.61	1.41	2.71	2.23	1.24	2.48	1.37	2.52	3.9	1.88	2.07	3.75	2.53	3.66	2.33	2.02	3.63	3.15	4.5	4.7	5.92	4.53	4.28	5.21	3.39	5.51	2.53	2.59	3.18	3.61	1.4	2.06	2.13	1.95	1.63	1.9
11997	Akr1b7	0.03	0.02	0.06	0.03	0.18	0.05	0.06	0.56	0.6	0.08	0.32	0.57	0.1	0.24	0.98	0.25	0.62	2.86	4.6	6.72	3.27	10.08	24.18	25.1	31.31	20.82	32.37	26.86	31.36	29.6	51.24	35.72	24.06	12.72	13.92	6.98	1.56	3.09	3.43	0.01	0.04	0.44	0.02	0.05	0.04
14187	Akr1b8	0.09	0.02	0.12	0.17	0.29	0.25	0.17	0.4	0.57	0.12	0.26	0.54	0.14	0.14	0.62	0.1	0.17	1.73	0.91	2.84	1.83	2.69	9.74	6.92	10.26	4.5	13.4	3.63	4.33	10.86	6.86	9.5	8.56	4.51	2.53	2.44	0.72	1.4	1.5	0.02	0.07	0.18	0.06	0.07	0.22
622402	Akr1c12	0.15	0.05	0.13	0.55	0.26	0.22	0.3	0.9	0.89	0.92	1.09	0.69	0.7	0.57	2.21	1.63	1.29	2.71	2.42	5.24	1.75	6.4	7.39	2.72	18.21	5.99	4.82	5.2	3.7	5.56	8.01	10.25	7.59	13.17	6.74	8.66	8.16	13.53	11.34	13.71	10.87	10.14	17.23	14.68	13.87
27384	Akr1c13	0.24	0.14	0.29	0.66	0.46	0.3	0.65	1.23	1.22	1.19	1.26	1.23	1.01	0.69	3.01	1.99	2.22	4.89	2.99	5.92	3.02	6.61	8.21	3.92	19.08	8.84	4.61	6.89	5.11	6.28	8.03	11.83	8.4	11.36	8.21	8.55	8.43	15.71	13.87	15.46	12.64	10.66	16.77	15.99	16.28
105387	Akr1c14	0	0	0	0	0	0	0	0.04	0.04	0.03	0.02	0.23	0.01	0	0.63	0.3	0.39	1.79	1.35	2.7	1.58	1.76	2.19	1.97	3.65	5.07	4.91	11.54	12.37	11.38	15.87	20.45	16.4	28.07	23.62	34.13	22.67	41.57	33.95	35.64	25.65	20.95	37.6	34.84	46.2
105349	Akr1c18	0	0	0	0.01	0.01	0	0	0.04	0.02	0.03	0.03	0.02	0.01	0.02	0.07	0.02	0.03	0.43	0.18	0.47	0.05	0.4	0.33	0.93	1.37	2.3	2.08	15.99	13.99	21.81	30.17	16.78	19.83	31.79	38.84	50.49	40.18	83.95	61.64	45.58	49.93	32.88	34.19	30.72	37.37
432720	Akr1c19	0.44	0.7	0.78	1.37	0.48	0.92	1.43	1.34	1.82	1.85	2.14	1.26	2.07	1.58	3.16	1.82	3	5.26	8.33	4.79	2.59	3.43	4.03	2.82	8.5	5.77	7.44	7.87	3.97	3.16	6.39	4.73	4.54	5.01	8.18	2.52	14.32	12	17.91	24.55	15.44	18.42	21.24	36.76	20.58
116852	Akr1c20	0	0	0	0	0	0	0	0	0	0	0	0.01	0	0	0	0.01	0	0.38	0.3	0.28	0	0.1	0.8	0.58	0.64	2.33	1.17	8.75	14.34	17.99	19.73	12.62	15.04	45.2	53.11	54.27	55.5	94.96	66.47	50.55	53.03	44.76	34.82	35.14	37.57
77337	Akr1c21	0	0	0	0	0	0	0	0.02	0.01	0	0	0.02	0	0	0	0.02	0	0.26	0.13	0.18	0.03	0.14	0.34	0.66	0.84	1.78	1.12	8.41	10.5	14.59	16.15	10.37	12.1	31.45	33.88	41.3	36.03	71.84	48.63	33.33	44.58	33.65	27.12	25	33.35
83702	Akr1c6	0	0	0	0	0	0	0	0.03	0.02	0.02	0.03	0.04	0.01	0	0.2	0.04	0.05	1.66	1.31	0.81	0.89	0.73	2.88	2.83	3.01	7	5.66	31.81	38.39	65.52	85.4	85.35	62.21	200.93	262.96	286.99	230.69	430.73	344.84	168.26	218.78	214.18	180.22	248.92	228.3
70861	Akr1cl	0	0	0	0	0	0	0	0.02	0.01	0.02	0.02	0.01	0	0	0	0.01	0.02	0.18	0.35	0.52	0.03	0.27	0.29	0.39	0.22	0.66	0.52	4.99	3.73	6.1	7.52	7.95	4.71	11.55	24.2	25.51	16.79	38.66	30.34	29.51	21.17	12.74	15.9	20.13	14.16
208665	Akr1d1	0	0	0	0	0	0	0	0.24	0.15	0.16	0.07	0.31	0.07	0.08	1.36	0.37	0.7	2.72	3.99	3.97	2.4	5.13	4.8	4.76	12.39	20.74	8.47	18.66	18.75	21.1	40.47	30.26	28.79	84.8	55.97	57.69	59.14	75.19	68.27	27.6	56.53	42.82	17.33	27.15	31.45
56043	Akr1e1	0.15	0.5	0.87	0.72	0.65	0.49	0.66	2.12	0.89	4.25	2.18	1.9	3.73	0.79	1.56	2.08	1.17	3.59	2.12	3.22	1.01	2.8	3.49	2.85	4.91	5.23	3.69	9.88	6.58	9.02	7.9	21.4	6.47	8.4	9.52	4.92	10.07	10.54	7.67	12.83	16.53	7.23	9.68	16.68	9.42
110198	Akr7a5	0.69	0.31	1.27	0.86	0.83	1.25	0.35	1.3	1.34	1	0.82	1.44	1.11	1.32	2.25	1.96	1.79	3.45	4.43	3.58	3.33	3.62	3.95	2.99	11.72	6.57	5.93	7.74	12.43	9.35	12.89	7.16	8.74	13.63	12.94	17.47	13.78	18.08	14.71	28.64	18.51	15.47	26.02	24.49	25.44
11651	Akt1	0.23	0.12	0.28	0.09	0.12	0.13	0.06	0.09	0.06	0.18	0.13	0.16	0.18	0.07	0.08	0.21	0.09	0.12	0.19	0.08	0.09	0.09	0.14	0.15	0.31	0.17	0.25	0.39	0.1	0.2	0.48	0.38	0.31	0.24	0.16	0.34	0.51	0.06	0.17	0.01	0.03	0.05	0.04	0.14	0.07
67605	Akt1s1	0	0.04	0.2	0.1	0.5	0.5	0.19	0.76	0.01	0.03	0.04	0.1	0.03	0.08	0.16	0.04	0.07	0.11	0	0.1	0.02	0	0.18	0.49	0.11	0.19	0.66	0	0.06	0.36	0.72	0.28	0.26	0.15	0.11	0.28	0.14	0.17	0.07	0.34	0.71	0.32	0.27	0.23	0.27
11652	Akt2	0.06	0.04	0.1	0.09	0.08	0.06	0.07	0.04	0.02	0.04	0.07	0.12	0.06	0.05	0.07	0.06	0.04	0.16	0.01	0.1	0.02	0.02	0.17	0.1	0.14	0.1	0.15	0.12	0.21	0.14	0.23	0.18	0.31	0.17	0.5	0.16	0.62	0.2	0.2	0.2	0.23	0.19	0.16	0.18	0.17
23797	Akt3	0.02	0	0.05	0.02	0	0.01	0	0	0	0	0.01	0.06	0.06	0	0.01	0	0.01	0.02	0	0	0	0	0.01	0	0	0	0.03	0.02	0.01	0	0.08	0.05	0	0.01	0.04	0.01	0.45	0	0	0	0.01	0.01	0	0	0
14339	Aktip	0	0	0	0	0	0	0	0	0	0	0	0	0	0	0	0	0	0	0	0	0	0	0	0	0	0	0	0	0	0	0	0.01	0	0	0	0	0	0	0	0	0	0	0	0	0
17025	Alad	16.06	14.52	18.12	12	17.16	15.58	12.45	16.79	15.48	14.09	12.53	18.91	13.79	10.31	14.61	14.71	7.77	14.21	7.25	5.09	8.69	5.16	7.76	5.18	8.51	8.74	3.76	8.15	6.11	8.67	11.87	8.93	10.01	13.5	13.37	21.72	19.1	36.96	28.75	19.61	15.48	11.42	14.16	16.51	12.76
11655	Alas1	0.01	0	0.21	0	0.01	0	0	0	0	0.02	0	0	0	0	0	0	0	0	0	0.05	0	0.03	0.45	0.05	0.25	0	0.01	0	0	0	0.03	0	0	0	0	0	0.02	0.01	0.05	0	0.01	0.02	0.04	0.04	0.36
11656	Alas2	0.62	0.51	0.55	0.79	0.34	0.48	0.66	0.42	0.69	0.91	0.72	0.47	1.08	0.72	0.35	0.38	0.51	0.22	0.05	0.11	0.27	0.04	0.46	0.01	0	0.01	0	0.01	0.03	0	0.04	0	0	0	0	0	0	0	0	0	0	0	0	0	0
11657	Alb	10.36	10.78	12.47	13.73	25.51	8.69	15.81	67.67	65.33	61.79	39	111.83	13.23	11.11	274.5	98.18	158.71	450.2	256.14	216.24	232.08	352.35	385.42	205.78	99.76	110.68	162.51	441.8	184	560.38	646.08	482.1	493.37	903.79	463.93	467.22	815.08	947.43	860.6	929.24	755.42	1199.8	667.31	690.77	731.54
622307	Albfm1	0	0	0	0	0	0	0	0	0	0	0	0	0	0	0	0	0	0	0	0	0	0	0	0	0	0	0	0	0	0	0	0	0.01	0	0	0	0	0	0	0	0	0	0	0	0
11658	Alcam	0.15	0.34	0.39	0.38	0.54	0.49	0.28	0.87	0.33	0.5	0.24	0.56	0.21	0.36	0.91	0.11	0.47	2.1	0.62	1.77	1.82	1.14	2.28	0.8	1.99	1.41	1.1	0.61	2.08	1.46	1.92	4.46	2.17	2.17	2.69	1.93	0.65	1.39	1.81	0.58	0.32	0.35	0.86	0.57	0.81
69748	Aldh16a1	0.22	0.16	0.87	0.25	0.48	0.39	0.38	0.96	0.89	0.29	0.71	0.6	0.52	0.48	0.84	0.37	0.97	2.5	0.23	0.57	0.53	0.26	1.76	0.17	1.07	1.18	1.4	0.89	1.86	1.46	2.5	1.24	2.21	3.01	1.37	1.11	1.26	1.42	1.23	1.66	1.55	2.72	1.23	3.52	2.84
56454	Aldh18a1	5.11	1.43	2.25	1.81	1.65	1.48	1.51	1.09	1.28	3.83	1.83	4.72	4.02	1.05	0.74	3.89	1.6	0.72	0.46	0.46	0.37	0.54	0.67	0.27	0.61	0.93	0.27	13.08	0.17	0.09	12.15	0.59	0.13	0.75	0	0.02	0	0	0	0	0	0	0	0	0
11668	Aldh1a1	0.22	0.1	0.12	0.12	0.1	0.08	0.14	0.14	0.12	1.3	0.31	0.16	0.63	0.16	0.26	0.96	0.3	0.86	1.67	1.38	0.38	3.08	0.82	0.46	5.21	2.66	0.89	3.17	2.73	0.77	4.66	3.68	1.36	6.01	4.49	5.04	47.17	48.34	38.69	198.52	299.39	232.8	262.3	334.38	292.3
19378	Aldh1a2	0.45	0.12	0.33	0.2	0.18	0.28	0.41	0.26	0.22	1.82	0.75	0.38	1.16	0.49	0.66	1.53	1.43	1.12	3.96	2.47	0.84	4.71	2.72	0.46	9.69	3.77	1.65	6.46	4.9	3.3	9.21	6.27	3.07	7.53	5.46	8.13	19.01	5.88	12.26	22.82	28.05	11.19	5.78	14.64	12.32
56847	Aldh1a3	0.21	0.15	0.13	0.57	0.09	0.1	0.49	0.49	0.14	1.35	0.36	0.16	0.75	0.26	0.31	1.07	0.47	0.92	2.06	1.67	0.4	3.37	1.51	0.54	5.58	3.16	1.12	4.78	2.8	0.93	5.49	3.84	1.09	5.9	4.28	2.63	13.97	3.07	5.4	17.5	23.04	10.24	2.62	10.4	9.72
26358	Aldh1a7	0.21	0.1	0.12	0.11	0.09	0.07	0.13	0.14	0.12	1.25	0.3	0.16	0.61	0.15	0.36	0.93	0.29	0.82	1.63	1.33	0.39	2.97	0.78	0.45	5.05	2.71	0.88	3.04	2.5	0.78	4.76	3.55	1.03	5.71	4.2	3.62	22.36	15.55	14.74	68.55	68.09	69.55	67.91	72.4	60.99
72535	Aldh1b1	1.31	5.8	2.62	3.59	3.65	3.66	6.75	11.07	7.58	9	9.05	11.27	5.44	6.6	18.28	12.25	11.82	26.84	30.64	22.32	25.79	29.43	35.93	33.1	89.43	52.14	51.91	63.44	56.03	43.33	74.28	40	47.17	98.87	73.58	58.35	94.29	76.43	55.66	79.04	61.06	67.32	21.8	34.07	39.13
107747	Aldh1l1	0.08	0.1	0.22	0.25	0.4	0.22	0.95	2.33	1.7	1.39	1.21	2.69	1.21	0.97	4.52	2.79	3.07	9.87	8.46	9.51	8.98	9.77	20.92	11.88	27.06	25.01	17.05	23.94	33.4	39.28	58.86	47.23	36.46	70.78	62.92	69.41	139.11	204.63	199.5	173.88	201.26	220.39	137.75	155.71	161.78
216188	Aldh1l2	0.03	0.02	0	0.04	0.03	0.03	0.09	0.16	0.13	0.13	0.15	0.2	0.15	0.11	0.58	0.65	0.43	0.72	0.76	1.18	0.78	1.29	1.86	0.79	3.81	3.6	1.92	5.13	3.44	4.41	8.01	5.41	2.86	8.75	7.27	7.34	15.2	20.79	18.39	33.03	25.43	18.38	11.39	10.23	16.03
11669	Aldh2	6.02	5.87	8.94	6.23	9.65	8.75	9.54	23.04	13.63	16.75	11.73	16.72	14.18	8.4	27.45	19.18	26.27	52.34	43.93	38.8	43.76	45.53	63.9	54.94	121.53	110.67	84.07	89.97	111.55	157.74	282.19	163.13	188.94	293.33	201.55	346.32	496.69	501.44	539.36	623.78	540.26	349.83	457.74	562.81	533.01
11670	Aldh3a1	0.01	0	0	0.02	0.02	0	0.03	0.13	0.08	0.04	0	0.18	0.12	0.07	0.13	0.06	0.18	0.45	0.34	0.3	0.1	0.34	0.28	0.36	1.5	1.04	0.79	1.67	1.23	1.78	1.42	2.04	4.16	3.04	5.92	2.25	2.32	2.28	2.39	0.59	2.65	3.82	0.93	0.81	0.81
11671	Aldh3a2	0.18	0.32	0.12	0.31	0.28	0.11	0.44	1.2	0.73	0.6	0.56	0.9	0.65	0.6	1.39	1.43	1.09	2.56	2.78	3.67	1.92	3.42	2.92	3.07	8.76	11.09	7.02	12.15	9.95	12.41	9.71	14.86	21.97	21.17	21.56	16.56	11.8	12.65	12.7	6.34	19.4	17.3	8.78	9.41	7.8
67689	Aldh3b1	0	0	0	0	0	0	0	0.02	0.01	0	0	0	0	0.06	0.06	0	0.07	0.05	0.04	0.1	0.03	0.01	0.08	0.02	0.09	0.05	0.13	0.13	0.03	0.16	0.06	0.08	0.1	0	0	0.04	0	0.01	0	0.02	0	0	0	0	0
621603	Aldh3b2	0	0	0	0	0	0	0	0	0	0	0	0	0	0	0.02	0	0	0.01	0.02	0.01	0.01	0	0.01	0	0.01	0.01	0.02	0.11	0	0.01	0.01	0.02	0.01	0	0	0	0	0.01	0	0	0	0	0	0	0
73458	Aldh3b3	0	0	0	0	0	0	0	0	0	0	0	0	0	0	0.01	0	0	0.01	0.01	0.01	0.01	0	0	0	0.01	0.01	0.01	0.08	0	0	0.01	0.01	0.01	0	0	0	0	0	0	0	0	0	0	0	0
212647	Aldh4a1	1.36	2.01	1.61	2.21	2.04	2.66	3.08	7.66	5.26	4.93	5.08	6.56	5.48	4.15	11.15	7.86	8.52	18.27	11.56	10.7	17.45	16.62	17.8	16.37	29.22	34	36.67	32.37	48.25	69.59	60.91	70.57	92.39	192.05	165.28	173.28	134.28	203.28	172.86	88.78	116.43	115.83	56.67	71.93	86.18
214579	Aldh5a1	0.11	0.13	0.21	0.23	0.23	0.14	0.28	0.47	0.32	0.43	0.51	0.51	0.5	0.23	1.01	0.53	0.79	1.72	1.32	2	1.41	1.82	3.22	1.21	6.92	4.24	1.94	4.03	3.2	3.93	6.2	5.16	2.69	9.41	6.06	7.59	10.46	9.07	7	8.99	13.71	7.25	6.5	6.74	7.05
104776	Aldh6a1	0.16	0.29	0.36	0.64	0.52	0.3	1.17	3.62	2.21	2.06	1.87	2.84	1.93	1.82	6.57	4.17	4.6	12.22	11.79	13.77	11.71	20.09	17.75	11.21	45.45	34.19	22.76	46.25	33.8	44.4	93.04	52.04	47.78	106.63	105.92	81.61	115.45	91.87	88.36	133.82	140.68	110.91	76.42	77.81	87.9
110695	Aldh7a1	1.29	0.93	1.95	1.81	1.55	1.28	1.5	3.98	3.55	3.51	3.3	3.51	2.81	2.12	9.03	4.53	6.28	16.94	12.6	13.8	7.7	15.6	15.17	11.39	30.7	29.25	22.43	20.25	25.01	21.43	38.06	31.65	27.6	59.02	47.35	36.7	67.51	52.26	49.32	73.89	74.14	62.29	93.43	106.29	88.76
237320	Aldh8a1	0.01	0.06	0.11	0.05	0.18	0.18	0.27	0.89	0.91	0.56	0.56	0.88	0.58	0.42	1.89	1.13	1.22	3.84	8.19	5.1	2.42	4.24	7.6	5.98	13.64	15.71	12.21	13.36	14.56	20.57	21.11	20.45	21.9	31.81	37.78	46.38	35.16	50.44	51.82	40.78	30.94	35.41	27.19	37.32	35.57
56752	Aldh9a1	3.59	3.3	7.21	2.52	3.9	3.56	3.48	5.31	3.93	4.6	4.13	6.46	5.08	4.05	7.66	5.71	4.98	14.1	7.18	8.91	5.76	7.35	7.54	8.71	24.34	19.82	20.02	15.84	23.66	21.66	30.28	26.57	21.44	21.94	38.9	28.27	32.13	41.52	36.19	42.25	46.89	49.28	30.28	31.69	41.44
11674	Aldoa	29.34	13.64	68.16	9.89	20.83	22.72	8.16	15.5	15.34	6.62	5.42	15.27	7.1	5.41	11.35	3.34	5.4	21.36	7.1	13.75	15.76	5.16	13.71	10.86	11.3	7.7	13.33	6.46	8.22	12.8	6.62	7.35	8.35	2.38	5.39	4.03	2.41	7.54	3.87	2.09	1.4	2.77	3.99	2.84	4.49
353204	Aldoart1	11.04	7.14	20.02	4.78	8.56	10.53	3.71	8.56	6.74	2.87	3.03	6.85	4.29	2.7	5.56	1.58	3.13	11.45	3.69	8.12	7.21	3.06	8.28	4.97	4.21	3.29	7.41	4.26	4.13	4.31	3.69	3.94	3.85	1.64	2.85	1.85	1.16	2.24	1.83	0.95	0.75	1.42	1.99	1.24	1.33
79459	Aldoart2	16.8	6.01	27.25	4.09	8.65	10.24	5.64	5.18	6.4	3.66	3.3	6.07	3.03	1.87	3.23	1.62	2.37	8.24	2.96	3.72	6.89	2.24	2.65	3.82	6.02	4.96	4.35	1.64	3.09	4.08	3.53	4.18	4.98	1.02	2.29	2.26	0.92	2.52	2.36	0.63	0.43	2.1	1.68	1.38	1.33
230163	Aldob	2.65	4.5	2.6	5.73	5.1	4.44	12.36	37.88	29.71	29.96	18.88	50.85	24	19.51	119.42	49.14	55.19	315.24	319.53	324.71	312.19	602.5	791.02	693.62	1342.26	1207.77	949.72	947.63	862.97	1099.32	1808.76	1104.33	839.6	1319.29	1460.98	1513.78	977.58	1599.96	1446.35	1421.59	1207.17	1230.27	1093.31	1152.95	1283.64
11676	Aldoc	0.06	0.04	0.1	0.03	0.08	0.06	0.64	0.29	0.22	0.12	0.12	0.27	0.12	0.08	1.56	0.09	0.31	2.33	2.61	3.25	2.31	2.26	3.09	1.95	3.74	3.27	2.22	2.25	0.52	1.75	1.36	0.63	0.59	0.05	0	0.01	0.05	0.38	0.67	0.64	0.38	0.33	0.84	0.51	1.45
208211	Alg1	0	0	0	0	0	0	0	0	0	0	0	0	0	0	0	0	0	0	0	0	0	0	0.01	0	0	0.02	0	0	0	0	0.02	0	0.04	0.02	0	0	0	0.02	0	0	0	0	0	0	0
380959	Alg10b	0	0.02	0	0	0	0	0	0	0	0	0	0	0	0	0	0	0.01	0	0	0	0	0	0	0.02	0	0	0.03	0	0	0.04	0.03	0	0.05	0	0.01	0.08	0.05	0.01	0.04	0.05	0	0	0.11	0.06	0.03
207958	Alg11	0.15	0	0	0.03	0.01	0	0.01	0	0.01	0.14	0.02	0.01	0	0.01	0.41	0.04	0	0.03	0.01	0.04	0	0.3	0.03	0.04	0.05	0.05	0.07	0.23	0	0	0.1	0	0.27	0.03	0.05	0.09	0.03	0	0.02	0.51	0.01	0.02	0.01	0.06	0.03
223774	Alg12	0	0	0	0	0	0	0	0	0	0	0	0	0	0	0	0	0	0	0	0	0	0	0	0	0	0	0	0	0	0	0	0	0	0	0	0	0	0	0	0	0	0	0.03	0.01	0.01
67574	Alg13	0	0	0	0	0.05	0	0	0	0	0	0	0	0	0	0	0	0	0	0.01	0	0	0	0	0.04	0	0.04	0	0	0	0	0	0	0	0	0	0	0	0	0	0	0	0	0.02	0	0
66789	Alg14	0	0	0	0	0	0	0	0	0	0	0	0	0	0.01	0	0	0.01	0	0	0	0	0	0	0	0	0.04	0.01	0.01	0	0.02	0.01	0	0.01	0	0.02	0	0	0	0	0	0	0	0.02	0.03	0
56737	Alg2	0.19	0.17	0.28	0.25	0.12	0.05	1.23	0.23	0.21	0.17	0.2	0.3	0.28	0.23	0.26	0.17	0.32	0.46	0.39	0.43	0.73	0.28	0.22	0.31	0.58	0.52	0.64	0.91	0.51	0.48	0.96	0.48	0.71	0.93	0.2	0.42	1.01	0.48	0.41	0.25	0.32	0.03	0.33	0.38	0.42
208624	Alg3	0.03	0.03	0.04	0.04	0.01	0.01	0.03	0	0	0	0.01	0	0.01	0.03	0.05	0.03	0.02	0.03	0.04	0	0.01	0.02	0.04	0.05	0.06	0.05	0.11	0.09	0.01	0.06	0.13	0.29	0.15	0.05	0.04	0.06	0.04	0.05	0.12	0.12	0.08	0	0.04	0.06	0.1
66248	Alg5	0.05	0.11	0.04	0.16	0.34	0.15	0.27	0.22	0	0.22	0.01	0.22	0	0.44	0.11	0.07	0.22	0.28	0.03	0.31	0.26	0.3	0.79	0.17	0.52	0.65	0.29	0.7	0.64	3.3	0.79	0.79	1.35	0.74	0.29	1.46	0.4	2.05	1.26	0.53	0.56	0.37	0.54	1.92	1.48
320438	Alg6	0	0	0	0	0	0	0.02	0	0	0	0.02	0	0.01	0.01	0	0	0	0.01	0	0.02	0	0	0.05	0	0.01	0.12	0.01	0.06	0	0.02	0.26	0	0.06	0.08	0.03	0	0.06	0	0.02	0	0	0	0	0	0.01
381903	Alg8	0.17	0.41	0	0.23	0.03	0.03	0.17	0.05	0.03	0.05	0.09	0.02	0.03	0.25	0.12	0.11	0.17	0.19	0.37	0.14	0.05	0.06	0.11	0.03	0.55	0.29	0.13	0.12	0.27	0.05	0.24	0.09	0.08	0.15	0.25	0.19	0.01	0.02	0.18	0	0	0	0	0	0.02
102580	Alg9	0	0	0	0	0	0	0	0	0	0	0.01	0	0	0	0	0	0	0	0.02	0	0	0	0	0	0	0.06	0	0	0.01	0	0	0	0	0	0.02	0.1	0	0	0	0	0	0.03	0	0.2	0
11682	Alk	0	0.01	0	0	0	0	0	0	0	0	0	0	0	0	0	0	0	0	0	0	0	0	0	0	0	0	0	0	0	0	0	0	0	0	0	0	0	0	0	0	0	0	0	0.02	0
211064	Alkbh1	0.01	0.01	0	0	0	0	0.01	0	0	0.01	0.01	0	0.01	0.01	0	0	0.01	0	0	0	0	0	0	0	0	0	0	0	0	0	0	0	0	0	0	0	0	0	0	0	0	0	0	0	0
231642	Alkbh2	0	0	0	0	0	0.01	0	0	0	0	0	0	0	0	0	0	0	0	0	0	0	0	0	0	0	0	0	0	0	0	0	0	0	0	0	0	0	0	0	0	0	0	0	0	0
69113	Alkbh3	0.15	0.01	0	0.04	0.14	0.04	0.12	0	0.02	0.11	0.03	0.01	0.1	0.02	0.06	0.21	0.14	0.18	0.23	0.03	0.03	0.19	0.04	0.21	0.12	0	0.14	0.04	0.31	0.3	0.23	0.06	0.24	0	0.05	0	0	0.1	0.17	0	0.43	0.11	0.07	0.43	0.1
72041	Alkbh4	0	0	0	0	0.03	0	0	0	0	0	0	0	0	0	0	0	0	0	0	0	0.06	0	0	0	0	0	0	0	0	0	0	0	0	0	0	0	0	0	0	0	0	0	0	0	0
268420	Alkbh5	0.06	0.02	0.14	0.02	0.18	0.2	0.1	0.07	0.15	0.04	0.03	0.06	0	0.01	0.01	0	0.05	0.02	0.06	0.29	0.03	0.02	0.03	0.14	0.03	0	0.08	0.05	0.01	0.12	0	0	0.31	0.02	0.07	0	0.02	0.01	0.04	0	0	0	0.03	0.09	0.01
233065	Alkbh6	0.13	0.03	0.07	0.1	0.04	0.05	0.11	0.04	0.03	0.07	0.01	0.03	0.08	0.01	0	0.04	0.08	0.01	0.01	0.01	0.02	0.03	0.04	0.06	0.14	0.08	0.08	0.21	0	0.09	0.13	0.12	0.07	0.13	0.15	0.03	0.12	0.04	0.03	0.06	0.3	0.03	0.06	0.05	0.04
66400	Alkbh7	0.02	0.01	0.06	0.03	0.09	0.06	0.12	0.01	0.02	0	0.03	0.03	0.13	0.02	0	0	0.01	0	0	0	0	0	0	0.05	0	0.03	0	0	0.02	0.07	0	0	0.01	0	0	0.02	0.09	0	0.03	0	0	0.03	0	0.03	0
67667	Alkbh8	0.04	0.07	0.03	0.22	0.1	0.14	0.09	0.01	0.02	0.02	0.02	0.15	0.09	0.04	0.01	0.03	0.01	0.03	0.01	0.29	0.01	0.02	0.24	0.01	0.02	0.02	0	0	0	0	0	0	0	0	0	0	0	0.05	0	0	0	0	0	0	0
236266	Alms1	0	0	0	0	0.03	0	0	0	0	0	0	0	0	0	0	0	0	0	0	0	0	0	0	0	0	0	0	0	0	0	0	0	0	0	0	0	0	0	0	0	0	0	0	0	0
11684	Alox12	0.03	0.02	0.12	0.05	0.11	0.06	0.01	0	0.04	0.01	0	0.04	0.01	0.01	0.04	0	0	0.11	0	0.18	0	0.05	0.14	0.46	0.01	0.01	0.13	0.02	0	0.01	0.05	0	0.07	0	0	0	0	0	0	0	0	0	0	0	0
11687	Alox15	0	0	0	0	0	0	0	0	0	0	0	0	0	0	0	0	0	0.04	0.01	0	0	0	0	0.03	0	0.02	0	0	0.03	0.01	0	0	0	0	0.04	0	0	0	0	0	0	0	0	0	0
11689	Alox5	0	0	0.02	0	0	0	0	0.01	0.01	0	0	0.02	0.01	0	0.01	0.01	0.01	0.05	0	0.58	0	0	0	0.02	0	0.01	0.01	0	0	0.01	0	0	0.01	0	0	0	0	0	0	0	0	0	0	0	0
11690	Alox5ap	0	0	0	0	0.81	0	0.78	1.15	0.53	0	0.59	0	0	0.11	0.48	0	0.8	1.55	0.11	0.54	0	0	0.76	0	0	0	0.15	0	0	0	0.68	0.39	1.47	0	0	0	0	0.05	0	0	0	0.22	0	0	0
71481	Alpk1	0	0	0.03	0	0.02	0	0	0	0	0	0	0	0	0	0.01	0	0.01	0	0	0	0	0	0	0.02	0.02	0	0	0	0	0	0	0	0.03	0	0	0	0	0	0	0	0	0	0	0	0
11647	Alpl	0	0	0.01	0	0.1	0	0	0.05	0.03	0.02	0.08	0.02	0.01	0	0.04	0.03	0	0.04	0.03	0	0.04	0.02	0.21	0.12	0.05	0.22	0.11	0.04	0.14	0.07	0	0.03	0.06	0	0	0	0	0	0	0	0	0	0	0	0
74018	Als2	0.08	0	0	0	0	0.01	0.01	0.03	0.02	0	0.51	0.22	0	0	0.08	0.25	0.02	0	0.03	0	0.01	0.15	0.02	0.01	0.18	0.05	0.25	1.64	0.21	0.14	0.11	0.11	0.39	0.08	0.28	0.35	0.07	0.02	0.03	0.13	0.02	0.08	0.18	0.04	0.04
235633	Als2cl	0	0	0	0	0	0	0	0	0	0	0	0	0	0	0	0	0	0	0	0	0	0	0	0	0.01	0.01	0.13	0.02	0.01	0	0.02	0	0.01	0.02	0	0.01	0.03	0	0	0	0.01	0.03	0	0.01	0
21681	Alyref	10.25	8.59	8.29	4.11	1.83	3.45	3.35	1.54	1.96	1.88	1.7	1.72	2.64	3.32	0.63	1.23	1.2	2.49	2.67	3.21	1.17	3.43	5.65	1.15	2.75	3.18	1.64	3.64	1.24	1.67	2.83	3.5	0.88	2.33	3.34	2.04	4.09	1.06	2.14	1.51	1.74	1.08	0.8	0.5	0.58
56009	Alyref2	11.72	7	7.24	2.87	0.95	2.37	2.73	0.95	1.62	1.85	1.61	1.46	2.56	2.21	0.55	1.06	1.03	1.94	2.78	2.88	1.03	3.78	5.51	0.87	2.45	2.67	0.72	4.02	1.44	1.3	3.31	3.91	0.9	1.79	3.94	2.13	4.72	1.22	2.58	1.5	1.57	0.99	0.97	0.46	0.32
17117	Amacr	0.03	0.05	0.03	0.7	1.31	0.06	0.31	1.29	0.89	0.26	0.37	1.45	0.44	0.62	1.09	0.46	2.21	3.82	1.42	1.55	1.84	4.2	2.43	3.68	3.78	7.67	6.02	11.09	15.86	17.81	21.41	22.42	14.25	33.85	22.8	26.13	15.37	19.53	17.03	11.82	10.04	6.69	7.44	10.03	10.89
11698	Ambn	0	0	0	0	0	0	0	0	0	0	0	0	0	0	0	0	0	0	0	0	0	0	0	0	0	0	0	0	0	0	0	0	0.01	0	0	0	0	0	0	0	0	0	0	0	0
11699	Ambp	0.31	0.37	0.27	0.42	0.49	0.71	0.52	1.41	0.63	1.02	0.45	0.97	0.71	1	1.33	1.55	1.31	1.19	2.69	3.12	2.07	0.88	2.26	1.3	3.32	4.26	2.47	3.1	3.66	4.73	4.21	5.74	3.08	5.16	1.93	0.73	1.98	1.75	1.5	7.4	0.7	1.22	1.36	0.92	0.69
228361	Ambra1	0	0	0.02	0	0	0.03	0.01	0	0	0	0	0	0.01	0	0	0	0	0	0	0	0	0	0.04	0	0	0	0	0	0	0	0	0	0	0	0	0	0	0	0	0	0	0	0	0	0
11702	Amd1	0.02	0	0.02	0.01	0.01	0.03	0.01	0	0.01	0	0	0	0.01	0	0	0	0.01	0	0	0	0	0	0	0	0	0	0	0	0	0	0	0	0	0	0	0	0	0	0	0	0	0	0	0	0
100041585	Amd2	0.02	0	0.02	0.01	0.01	0.03	0.01	0	0.01	0	0	0	0.01	0	0	0	0.01	0	0	0	0	0	0	0	0	0	0	0	0	0	0	0	0	0	0	0	0	0	0	0	0	0	0	0	0
71761	Amdhd1	0.02	0.06	0.03	0.15	0.18	0.12	0.17	0.8	0.8	0.38	0.43	1.15	0.45	0.26	1.42	1.09	1.14	5.72	3.46	3.36	2.73	2.64	3.94	9.06	16.64	13.9	13.46	10.88	12.07	20.31	30.72	28.66	29.25	67.46	55.86	60.41	51.04	90.32	56.5	37.21	45.45	21.8	34.66	38.89	36.57
245847	Amdhd2	0.03	0.08	0.19	0.08	0.15	0.06	0.12	0.4	0.13	0.08	0.03	0.24	0.04	0.05	0.07	0.1	0.3	0.57	0.38	0.73	0.78	0.14	0.26	0.27	2.28	0.77	0.21	0.38	0.58	0.73	0.33	1.29	0.64	0.11	0.37	0.26	1.08	0.19	0.06	0.47	0.14	0.17	0.29	0.06	0.13
23802	Amfr	0.04	0.04	0.05	0.07	0.05	0.02	0.05	0.04	0.01	0.05	0.08	0.03	0.17	0.07	0.11	0.06	0.01	0.09	0.01	0.13	0.08	0.05	0.05	0.06	0.39	0.11	0.18	0.16	0.06	0.2	0.13	0.29	0.25	0.19	0.12	0.12	0.23	0.29	0.27	0.06	0.12	0.09	0.15	0.1	0.21
110542	Amhr2	0	0	0	0	0	0	0	0	0	0	0	0	0	0	0	0	0	0	0	0	0	0	0	0	0	0	0	0	0	0	0	0	0	0	0	0	0.06	0	0	0	0	0	0	0	0
320844	Amigo3	0	0	0	0	0	0	0	0	0	0	0	0	0	0	0	0	0	0	0	0	0	0	0	0.03	0	0	0	0	0	0	0	0	0	0	0	0	0	0	0	0	0	0	0	0	0
56068	Ammecr1	0.18	0.17	0.17	0.16	0.81	0.12	0.18	0	0.06	0.04	0.08	0.1	0.04	0.1	0.03	0.08	0	0.06	0	0.01	0.01	0	0	0	0.01	0	0.05	0	0	0	0	0	0	0	0	0	0	0	0	0	0	0	0	0	0
225339	Ammecr1l	0.04	0.03	0.03	0.02	0.01	0.06	0.04	0	0.03	0.01	0.01	0.03	0.02	0.02	0	0.02	0	0.02	0.02	0.01	0.01	0	0	0	0.03	0.01	0.03	0	0.01	0	0	0.01	0	0.01	0	0	0.01	0	0.01	0.08	0	0	0	0	0
27494	Amot	0	0.01	0	0	0	0	0	0	0	0	0	0	0	0	0	0	0	0	0	0	0	0	0	0	0	0.02	0	0	0	0	0	0	0	0	0	0	0	0	0	0	0	0	0	0	0
75723	Amotl1	0	0	0	0	0	0	0	0	0	0	0	0	0	0	0	0	0	0	0	0	0	0	0	0	0	0.01	0	0	0	0	0	0	0	0	0	0	0	0	0	0	0	0	0	0	0
229665	Ampd1	0	0.02	0	0.02	0.03	0.03	0	0	0.03	0	0.02	0.01	0.02	0.02	0	0.03	0	0	0.07	0.05	0	0.05	0	0	0	0.07	0	0.08	0.07	0	0	0	0.03	0	0	0	0	0	0	0	0	0	0	0	0
109674	Ampd2	0.52	0.53	1.34	2.87	0.54	1.2	1.74	1.1	0.69	2.05	0.54	0.66	1.14	0.36	0.58	0.4	0.59	0.43	0.33	4.02	0.3	0.24	2.86	0.2	0.54	0.39	0.3	0.43	0.24	0.61	1.66	0.43	0.22	0.31	0.28	0.41	0.44	1.47	0.29	0.12	1.69	0.1	0.48	0.6	0.12
11717	Ampd3	0.05	0.04	0.11	0.11	0.17	0.09	0.08	0.08	0.09	0.07	0.17	0.19	0.07	0.08	0.1	0.13	0.13	0.09	0.09	0.17	0.03	0.06	0.12	0.01	0.01	0.07	0.04	0.09	0.07	0	0	0	0.03	0	0.03	0	0	0	0	0	0	0	0	0	0
218038	Amph	0	0.04	3.93	0	2.02	0	0.03	1.7	0	0.01	0.06	1.83	0.02	0.01	0.78	0.01	0	0.8	0.04	0.01	0.02	0.05	0.09	1.06	0	0	0.34	0	0	0.05	0.05	0	0.05	0.01	0	0	0	0	0.01	0	0	0	0.04	0	0.01
434437	Amt	0.11	0.98	0.8	1.54	0.17	1.06	0.52	0.56	0.92	0.29	0.15	0.39	0.23	0.28	1.89	2.38	0.13	1.04	0.14	1.59	0.54	0.59	3.49	0.91	2.81	10.02	1.51	3.87	7.88	8.56	3.19	11.43	8.38	19.66	14.51	14.98	12.99	14.48	9.93	4.98	12.87	4.5	1.65	1.99	2.36
11722	Amy1	0	0	0	0	0	0	0	0	0.01	0	0	0	0	0	0	0.38	0.85	0.77	0.05	0.03	0	0.05	0.02	0.03	0.13	0.03	0.61	0.1	0.44	0.03	0.12	0.04	0.27	0.03	0.08	0.07	0.03	0.07	0.01	0.01	0.04	0.13	0.01	0.08	0.01
100043207	Amy2a1	0	0	0	0	0	0	0	0	0.01	0	0	0	0	0	0	0.82	1.8	1.63	0.07	0	0	0.06	0.01	0.01	0.01	0.01	1.04	0.17	0.76	0.02	0.03	0	0.36	0.42	0.08	0.12	0.01	0.01	0.01	0.01	0.01	0	0.01	0.05	0.01
100043688	Amy2a2	0	0	0	0	0	0	0	0	0.01	0	0	0	0	0	0	0.8	1.67	1.78	0.04	0.01	0	0.04	0	0	0.01	0.01	0.84	0.1	0.47	0.02	0.03	0	0.47	0.26	0.05	0.08	0.01	0.01	0.01	0.01	0.01	0	0.01	0.05	0
100043686	Amy2a3	0	0	0	0	0	0	0	0	0.01	0	0	0	0	0	0	0.8	1.67	1.78	0.04	0.01	0	0.04	0	0	0.01	0.01	0.84	0.1	0.47	0.02	0.03	0	0.47	0.26	0.05	0.08	0.01	0.01	0.01	0.01	0.01	0	0.01	0.05	0
100043684	Amy2a4	0	0	0	0	0	0	0	0	0.01	0	0	0	0	0	0	0.8	1.67	1.78	0.04	0.01	0	0.04	0	0	0.01	0.01	0.84	0.1	0.47	0.02	0.03	0	0.47	0.26	0.05	0.08	0.01	0.01	0.01	0.01	0.01	0	0.01	0.05	0
109959	Amy2a5	0	0	0	0	0	0	0	0	0.01	0	0	0	0	0	0	0.97	1.99	2.22	0.04	0.01	0	0.04	0	0.01	0.01	0.01	0.95	0.1	0.49	0.02	0.04	0	0.62	0.27	0.06	0.08	0.02	0.02	0.02	0.02	0.01	0	0.01	0.07	0
545562	Amy2b	0	0	0	0	0	0	0	0	0	0	0	0	0	0	0	0.61	0.97	1.09	0	0.01	0	0.01	0.01	0.01	0.03	0.01	0.49	0.01	0.54	0.01	0.03	0	0.36	0.03	0.02	0.01	0.01	0.02	0.02	0.01	0.01	0	0.01	0.06	0.02
17222	Anapc1	0.06	0.07	0.16	0.05	0.12	0.12	0.06	0.05	0.05	0.04	0.06	0.09	0.06	0.08	0.04	0.06	0.02	0.06	0.01	0	0.03	0.01	0.01	0.03	0.01	0.03	0.04	0.01	0.02	0.01	0.03	0	0.04	0	0.03	0	0	0	0	0	0	0.01	0	0	0.01
68999	Anapc10	0.05	0.03	0.08	0.04	0	0	0.02	0.03	0	0.03	0	0	0.03	0.01	0	0.03	0.01	0	0	0.02	0	0.01	0	0	0	0	0	0	0	0	0	0	0	0	0	0	0	0	0	0	0	0	0	0	0
66156	Anapc11	0	0	0.02	0	0.02	0	0	0	0	0	0	0	0	0	0.02	0	0	0	0	0	0	0	0	0	0	0	0	0	0	0	0	0	0	0	0	0	0	0	0	0	0	0	0	0	0
69010	Anapc13	0.35	0	0.69	0.56	0	0.98	0.24	0.1	0.22	0.07	0.16	0.75	0.29	0.22	0.3	0	0.19	0.75	0	0.31	0.43	0.15	0.09	0	0	0	0.1	0.18	0.21	0	0	0	0.23	0	0.2	0	0	0	0.24	0	0	0	0.3	0	0
52717	Anapc16	0.04	0.02	0.06	0.01	0.04	0.05	0.04	0.02	0.05	0.01	0.05	0.02	0.02	0.01	0	0	0.01	0.01	0	0.01	0.01	0	0.07	0	0	0	0	0	0	0	0	0	0	0	0	0	0	0	0	0	0	0	0	0	0
99152	Anapc2	0.2	0.11	0.25	0.24	0.14	0.12	0.09	0.19	0.08	0.1	0.08	0.09	0.14	0.12	0.06	0.12	0.08	0.08	0.06	0.04	0.07	0.03	0.05	0.1	0.1	0.1	0.09	0.07	0.17	0.04	0.06	0.08	0.37	0.07	0.07	0.01	0.01	0.01	0.02	0.09	0	0.02	0.01	0.01	0
52206	Anapc4	0.11	0.14	0.57	0.1	0.14	0.1	0.08	0.07	0.09	0.07	0.04	0.12	0.03	0.02	0.06	0.04	0.03	0.15	0	0	0.06	0	0.04	0.03	0.01	0.08	0.03	0	0.04	0.12	0	0.02	0.03	0	0.01	0.02	0	0.04	0.03	0.03	0	0	0	0	0
59008	Anapc5	0.16	0.16	0.27	0.15	0.21	0.29	0.09	0.15	0.06	0.14	0.18	0.07	0.03	0.12	0.01	0.03	0.23	0.42	0.08	0	0.08	0.01	0.18	0.06	0	0	0.12	0.02	0.06	0.02	0	0.03	0.03	0	0.01	0.01	0	0.01	0	0	0	0	0.01	0	0
56317	Anapc7	0.14	0.04	0.18	0.2	0.12	0.07	0.1	0.13	0.07	0	0	0.2	0.04	0.02	0.1	0.01	0.03	0.04	0.01	0	0	0	0.01	0.01	0.05	0.08	0.16	0	0.07	0	0	0.06	0.03	0.09	0.28	0.03	0	0.02	0	0	0	0	0	0	0
52477	Angel2	0	0.01	0	0	0	0.01	0	0	0	0	0	0	0.01	0	0	0.12	0	0	0	0	0.02	0	0	0	0	0	0	0	0	0	0	0	0	0	0	0	0	0	0	0	0	0	0	0	0.01
26360	Angptl2	0	0	0	0	0	0	0	0	0.02	0	0	0.01	0	0	0	0	0	0	0	0	0.01	0	0	0	0	0	0	0.31	0	0	0	0	0.02	0	0	0	0	0	0	0	0	0	0	0	0
30924	Angptl3	0	0	0	0	0	0	0	0.01	0.12	0.01	0.03	0.03	0.02	0.01	0.06	0.07	0.03	0.05	0.57	0.12	0.01	0	0	0	0.08	0.08	0.09	0.12	0.05	0.04	0.45	0.02	0.04	1.11	0.05	0.09	0.16	0.03	0.07	0.09	0.05	0.02	0.03	0.03	0.03
70726	Angptl6	0	0.01	0	0	0	0	0	0	0.02	0	0	0.02	0	0	0	0	0	0	0	0	0.01	0	0.07	0.32	0.11	0	0	0	0.1	0	0.32	0.4	0.02	0	0.28	0	0	0	0	0	0	0	0	0	0
624219	Angptl8	0	0	0	0	0	0	0	0	0	0	0	0	0	0	0	0	0	0	0.01	0	0	0	0	0	0	0	0	0	0	0	0	0	0	0	0	0	0	0	0	0	0	0	0	0	0
11733	Ank1	1.97	1.93	5.88	4.66	2.3	1.91	2.83	3.64	3.46	2.54	4.37	2.75	2.31	2	1.29	2.11	1.62	1.45	1.18	0.69	0.93	0.71	3.77	1.03	0.24	0.44	1.75	0.7	0.45	0.16	0.33	0.24	0.42	0.1	0.05	0.17	0.29	0.29	0.04	0.09	0.11	0.03	0.1	0.17	0.5
109676	Ank2	0.02	0	0.02	0.02	0.02	0.01	0.01	0.01	0.02	0.03	0.03	0.03	0	0.01	0.04	0.01	0.02	0.05	0.01	0	0.01	0	0.01	0.05	0.02	0.03	0.03	0.01	0.03	0.02	0.01	0.01	0.01	0.01	0.01	0.01	0	0	0	0	0	0	0	0	0
11735	Ank3	0.16	0.07	0.11	0.32	0.11	0.21	0.18	0.17	0.16	0.29	0.24	0.21	0.24	0.23	0.19	0.25	0.36	0.39	0.14	0.35	0.38	0.22	1.65	0.22	0.32	0.41	0.15	0.14	0.23	0.06	0.49	0.3	0.29	0.46	0.33	0.08	0.22	0.15	0.09	0.19	0.11	0.08	0.09	0.05	0.06
319196	Ankef1	0	0	0	0	0	0.04	0	0	0	0	0	0	0.02	0	0	0	0	0	0	0	0	0	0	0	0	0	0	0	0	0	0	0	0	0	0	0	0	0	0	0	0	0	0	0	0
11736	Ankfy1	0.35	0.23	0.45	0.19	0.28	0.42	0.25	0.52	0.3	0.32	0.24	0.78	0.31	0.21	0.8	0.3	0.19	0.27	0.34	0.58	0.67	0.24	0.31	0.33	0.56	0.4	0.36	0.58	0.61	0.48	0.51	0.43	0.51	0.27	0.3	0.49	0.27	0.34	0.18	0.21	0.23	0.07	0.22	0.19	0.31
108857	Ankhd1	0.08	0.05	0.14	0.06	0.14	0.13	0.04	0.08	0.05	0.02	0.04	0.07	0.06	0.02	0.07	0.05	0.02	0.11	0.04	0.02	0.06	0.01	0.08	0.04	0.03	0.05	0.06	0.01	0.03	0.12	0.03	0.08	0.11	0.05	0.02	0.15	0.02	0.15	0.01	0	0	0.04	0.02	0.01	0.03
70797	Ankib1	0.01	0	0	0	0	0	0	0	0	0	0	0	0	0	0	0	0	0	0	0	0	0	0	0	0	0	0	0	0.02	0	0	0	0.01	0	0	0	0	0	0	0	0	0	0	0	0
244859	Ankk1	0	0	0	0	0	0	0	0	0.02	0	0.01	0	0	0	0.03	0	0	0	0	0	0	0	0.48	0	0	0	0	0	0	0	0	0	0	0	0	0	0	0	0	0	0	0	0	0	0
234396	Ankle1	0	0	0	0	0	0	0.01	0	0	0	0	0	0	0	0	0	0	0	0	0	0	0	0	0	0	0	0	0	0	0	0	0	0	0	0	0	0	0	0	0	0	0	0	0	0
71782	Ankle2	0.02	0.03	0.1	0.02	0.05	0.05	0.09	0.03	0.02	0.01	0.07	0.02	0.06	0.01	0	0.01	0.07	0.03	0.01	0	0.01	0	0.01	0.01	0	0.02	0.01	0	0	0.01	0	0.01	0.01	0	0.02	0	0.06	0.02	0.01	0	0	0.01	0	0.05	0
217473	Ankmy2	0.3	0.22	0.06	0.13	0.05	0.08	0.17	0.02	0.05	0.04	0.13	0.06	0.19	0.17	0.08	0.04	0.08	0.08	0.18	0.01	0.09	0	0.02	0.01	0.01	0.04	0.1	0.08	0.06	0.07	0.01	0.05	0.17	0.08	0.04	0.06	0.17	0.14	0.13	0.09	0	0.03	0.03	0.08	0.02
107765	Ankrd1	0	0	0	0	0	0	0	0	0	0	0.01	0	0	0	0	0	0	0	0	0	0	0	0	0	0	0	0	0	0	0	0	0	0	0	0	0	0	0	0	0	0	0	0	0	0
102334	Ankrd10	0.17	0.02	0.04	0.23	0.25	0.09	0.01	0.22	0	0.49	0	0.01	0.03	0	0.01	0.19	0	0.41	0	0	0	0	0	0	0	0	0	0	0	0	0	0	0	0	0	0	0	0	0	0	0	0	0	0	0
77087	Ankrd11	0	0	0	0	0	0	0	0	0	0	0	0	0	0	0	0	0	0	0.01	0	0	0	0	0	0	0	0	0	0	0	0	0	0	0	0	0	0	0	0	0	0	0	0	0	0
68420	Ankrd13a	0.53	0.09	0.04	0.75	0.34	0.13	0.62	1.14	1.28	0.04	0.07	0.07	0.1	0.6	0.62	0.01	0.53	0.04	0.05	0.16	0.09	0.01	0.87	0.01	0.22	0.03	0.03	0	0	0.02	0.02	0	0.05	0.01	0	0.52	0	0.71	0	0	0	0	0	0.02	0
433667	Ankrd13c	0	0	0	0	0.01	0	0	0	0.01	0	0	0	0	0	0	0	0	0	0	0	0	0	0	0	0	0	0	0	0	0	0	0	0	0	0	0	0	0	0	0	0	0	0	0	0
68423	Ankrd13d	0.01	0.01	0	0.01	0.01	0.02	0.01	0.01	0	0.01	0.01	0.01	0.01	0.01	0	0	0.01	0.01	0	0	0	0.01	0	0	0	0	0	0	0	0	0	0	0	0	0	0	0	0	0	0	0	0	0	0	0
81702	Ankrd17	0.13	0.05	0.48	0.07	0.16	0.17	0.04	0.07	0.06	0.26	0.04	0.07	0.05	0.04	0.12	0.03	0.06	0.2	0.09	0.04	0.07	0.03	0.07	0.09	0.06	0.03	0.13	0.01	0.02	0.11	0.01	0.08	0.03	0.03	1.27	0.19	0.01	0.09	0.03	0	0	0.04	0.02	0.01	0.02
78321	Ankrd23	0	0	0	0	0	0	0	0	0	0	0	0	0	0	0	0	0	0	0	0	0	0	0	0	0	0	0	0	0	0	0	0	0	0	0	0	0	0	0	0	0	0.04	0	0	0
232339	Ankrd26	0	0	0	0	0	0	0	0	0	0	0	0	0	0	0.01	0	0	0.02	0	0	0	0	0	0	0	0	0	0	0.02	0.01	0	0	0	0.01	0	0	0	0	0	0.03	0	0	0	0.02	0
245886	Ankrd27	0.3	0	0.02	0	0	0	0	0	0.01	0.01	0	0.04	0.01	0	0	0.04	0.01	0.03	0.17	0	0.02	0.21	0	0.02	0.01	0	0.01	0.02	0.08	0	0	0	0	0	0	0	0	0	0	0	0	0	0.01	0	0
105522	Ankrd28	0.04	0.02	1.53	0.03	0.74	0.03	0.84	0.63	0.08	0.05	0.02	0.69	0.02	0.01	0.61	0.04	0.04	0.14	0.03	0.04	0.02	0.02	0.15	0.06	0.12	0.1	0.46	0.11	0.09	0.07	0.07	0.06	0.22	0.12	0.19	1.18	0.13	0.54	0.28	0.12	0.03	0.34	0.08	0.15	0.27
225187	Ankrd29	0	0	0	0	0	0.02	0	0	0.02	0	0	0	0	0	0	0	0	0	0	0.03	0	0	0	0	0	0	0	0	0	0	0	0	0	0	0	0	0	0	0	0	0	0	0	0	0
213121	Ankrd35	0	0	0	0	0	0	0	0	0	0	0	0	0	0	0	0	0	0	0	0	0	0	0	0	0	0	0	0	0	0	0	0.91	0	0	0	0	0	0.16	0.23	0	0	0.54	0	0	0
76389	Ankrd36	0	0	0	0	0	0	0	0	0	0	0	0	0	0	0	0	0	0	0	0	0	0	0	0.01	0	0	0	0	0	0	0	0	0	0	0	0	0	0	0	0	0	0	0	0	0
109346	Ankrd39	0	0	0	0	0.01	0	0	0	0	0	0	0	0	0	0	0	0	0	0	0	0	0	0	0	0	0	0	0	0	0	0	0	0	0	0	0	0	0	0	0	0	0	0	0	0
71452	Ankrd40	0.06	0	0.05	0	0.13	0.04	0.05	0	0	0	0.06	0	0	0	0	0	0	0	0	0	0	0	0.03	0	0	0	0	0	0	0	0.04	0	0.2	0	0.01	0.31	0.38	0	0	0	0	0	0	0	0.01
73845	Ankrd42	0	0	0	0	0	0	0	0	0	0	0	0	0	0	0	0	0	0	0	0	0	0	0	0.02	0	0	0	0	0	0.04	0	0	0	0	0	0	0	0	0	0	0	0	0	0	0
329154	Ankrd44	0.01	0.03	0.01	0	0.02	0.03	0.01	0.05	0.04	0.06	0.01	0.02	0.01	0.08	0.01	0.02	0.02	0.03	0.02	0.04	0.03	0.01	0.01	0.14	0.11	0.07	0.14	0.02	0.09	0.08	0.05	0.04	0.21	0.01	0.05	0.26	0	0	0	0	0	0	0	0	0
68839	Ankrd46	0	0	0	0.01	0	0	0	0	0	0	0	0	0.01	0	0	0.66	0	0.02	0	0.03	0	0	0	0.03	0	0	0.08	0.06	0.01	0.06	0	0	0.09	0	0	0	0	0.02	0.01	0	0.06	0	0.04	0.09	0
56503	Ankrd49	0	0.01	0.02	0.03	0.03	1.14	0	0	0	0	0.01	0	0.01	0	0	0	0	0	0.01	0	0	0.01	0.02	0.02	0	0.02	0	0	0	0.01	0	0	0.01	0	0	0	0	0	0	0	0	0	0	0	0
237615	Ankrd52	0.04	0.01	0.07	0.07	0.08	0.06	0.05	0.04	0.05	0.03	0.02	0.02	0.04	0.01	0.01	0.03	0.01	0.02	0.01	0	0.01	0.01	0	0.01	0.06	0.02	0.01	0.02	0	0.04	0	0.02	0.01	0	0	0.01	0.05	0	0	0.05	0	0.01	0	0	0
223690	Ankrd54	0.07	0.05	0	0	0.09	0.01	0.04	0.02	0.02	0.06	0	0.05	0.05	0.33	0.01	0	0	0	0	0.52	0	0	0	0	0	0	0	0	0	0	0	0	0	0	0	0	0	0	0	0	0	0	0	0	0
140577	Ankrd6	0	0	0	0	0	0	0	0	0	0	0	0	0	0.02	0	0.06	0	0	0	0	0	0	0	0	0	0	0	0	0	0	0	0	0	0	0	0	0	0	0	0	0	0	0	0	0
383787	Ankrd63	0	0	0	0	0	0	0	0	0	0.03	0	0	0	0	0	0.02	0	0	0	0	0	0	0	0	0	0	0	0	0	0	0	0	0	0	0	0	0	0	0	0	0	0	0	0	0
100043332	Ankrd66	0	0.07	0	0	0	0	0	0	0	0	0	0	0	0	0	0	0	0	0	0	0	0	0	0	0	0	0	0	0.38	0	0	0	0	0	0	0	0	0	0	0	0	0	0	0	0
74251	Ankrd9	0.01	0	0	0	0.01	0.1	0.03	0.01	0.01	0	0.02	0.01	0.04	0	0	0	0	0	0	0	0	0	0	0	0	0	0	0	0	0	0	0	0	0	0	0	0	0	0	0	0	0	0	0	0
224650	Anks1	0.01	0	0	0	0.01	0.01	0.01	0.01	0.01	0.01	0	0.01	0.01	0.01	0.01	0.01	0.01	0.02	0.01	0	0.01	0.01	0.03	0.12	0.01	0.01	0.05	0.04	0	0.02	0.02	0.02	0.11	0.01	0.01	0.01	0.01	0.01	0	0	0	0	0	0.01	0
72615	Anks3	0	0	0	0	0	0	0	0	0	0	0	0	0	0	0	0	0	0	0	0	0	0	0	0	0	0	0	0	0	0	0	0	0.01	0	0	0	0	0	0	0	0	0	0	0	0
52231	Ankzf1	0.03	0	0.11	0	0.07	0.06	0.01	0.02	0.04	0.01	0.02	0.01	0.01	0	0.05	0.1	0.17	0.03	0.07	0	0.01	0	0.03	0.06	0.08	0.03	0.21	0	0.01	0.05	0	0	0	0	0	0.01	0.03	0.01	0.02	0.01	0	0.01	0.08	0	0.01
68743	Anln	0.07	0.09	0.21	0.08	0.22	0.2	0.43	0.11	0.13	0.05	0.05	0.11	0.16	0.1	0.04	0.03	0.1	0.25	0	0.01	0.01	0	0	0	0	0.07	0.1	0	0	0	0	0	0	0	0	0	0	0	0	0	0	0	0	0	0
102566	Ano10	0	0.01	0	0	0	0	0	0	0.02	0.01	0	0.01	0.02	0.03	0.04	0.02	0.02	0.06	0.02	0.12	0.05	0.03	0.14	0.04	0.09	0.04	0.09	0.12	0.14	0.09	0.12	0.17	0.11	0.09	0.09	0.02	0.02	0.04	0	0.04	0.02	0	0.01	0.02	0.03
243634	Ano2	0	0	0	0	0	0	0	0	0	0	0	0	0	0	0	0.06	0	0	0	0	0	0	0	0	0	0	0	0	0	0	0	0	0	0	0	0	0	0	0	0	0	0	0	0	0
228432	Ano3	0	0.02	0	0	0	0	0	0	0	0	0	0	0	0	0	0	0	0	0	0	0	0	0	0	0	0	0	0	0	0.08	0	0	0	0	0	0	0	0	0	0	0	0	0	0	0
233246	Ano5	0	0	0	0	0	0	0	0	0	0	0	0	0	0	0	0	0	0	0	0	0	0	0	0	0	0	0	0.02	0	0	0	0	0	0	0	0	0.37	0.28	0	0	0	0	0	0	0
105722	Ano6	0.12	0	0.01	0.03	0.02	0.01	0.03	0.05	0.02	0.01	0.03	0.03	0.02	0.02	0.01	0	0.02	0.05	0.02	0.02	0.03	0	0.15	0.06	0.06	0.09	0.09	0	0.13	0.09	0.01	0.08	0.15	0	0.17	0	0	0.01	0.01	0	0	0	0.06	0	0
382014	Ano8	0	0	0	0	0	0	0	0	0	0	0	0	0	0	0	0	0.05	0	0	0	0	0	0	0	0	0	0	0	0	0	0	0	0.09	0	0	0	0	0	0	0	0	0	0	0	0
11737	Anp32a	23.83	12.89	30.06	10.78	15.93	11.05	9.27	14.95	8.19	16.89	10.63	15.94	19.83	6.95	12.16	11.27	13.37	21.41	12.26	9.76	18.9	15.78	20.36	15.54	34.78	11.55	22.36	20.25	9.31	12.18	30.28	14.49	12.41	23.34	12.95	11.88	18.55	22.37	19.62	8.41	10.3	7.83	5.59	9.28	5.78
67628	Anp32b	20.66	17.22	33.3	19.55	18.11	16.57	16.16	17.06	14.11	13.21	11.86	27.13	23.44	12.7	16.99	13.87	11.67	18.85	11.94	22.65	16.57	12.05	13.52	9.87	35.85	10.1	11.33	45.4	8.02	13.96	16.95	13.09	8.34	12.38	7.13	12.57	42.1	6.36	4.94	29.47	6.49	2.88	1.85	3.11	2.95
66471	Anp32e	8.48	5.51	9.76	5.76	7.89	6.11	5.63	5.34	7.13	7.39	5.2	5.24	6.65	6.38	5.49	3.79	3.4	4.95	2.69	3.28	3.59	2.95	5	3.34	4.24	4.56	5.98	2.64	1.64	2.3	2.14	2.86	1.88	1.5	1.27	1.59	0.4	0.94	0.68	0.2	0.23	0.32	0.16	0.39	0.74
16790	Anpep	0.14	0.32	0.65	0.3	0.81	0.45	0.63	1.51	1.09	0.72	0.5	0.97	0.58	0.55	1.67	0.78	0.9	2.55	1.01	0.91	1.6	1.28	1.63	2.19	3.15	3.03	4.86	1.27	2.49	2.98	2.05	3.52	1.67	1.28	2.97	2.55	0.94	3.24	3.77	1.32	2.3	1.08	2.37	3.53	4.81
71914	Antxr2	0	0.04	0	0	0.07	0	0	0	0.19	0	0.12	0	0	0	0	0.03	0	0	0.64	0	0.56	0.66	0	0	0.13	0	0	0	0	0	0.01	0	0.66	0	0	0	0	0	0.82	0	0	0	0	0	0
16952	Anxa1	0.59	0.48	1.13	0.63	0.88	0.34	1.24	6.25	4.32	1.82	2.24	4.61	1.5	1.44	10.32	3.11	5.54	11.12	8.82	11.53	12.49	5.79	3.43	12.21	7.62	8.64	9.06	4.29	4.11	8.15	6.8	8.16	7.03	1.66	1.45	1.74	0.48	1.18	1.11	0.3	0.17	0.45	0.48	0.46	0.24
11744	Anxa11	0.02	0.06	0.41	0.1	0.09	0.39	0.12	0.42	0.23	0.27	0.34	0.55	0.42	0.28	0.47	0.52	0.45	0.91	0.4	0.75	0.48	0.53	0.55	0.52	1.01	0.44	0.18	0.26	0.43	0.55	0.94	2.35	0.55	0.75	1.14	0.57	0.42	1.09	0.94	0.41	0.51	0.74	0.91	0.64	0.43
69787	Anxa13	0	0	0	0	0	0	0	0	0	0	0	0	0	0	0	0	0	0	0	0	0	0	0	0	0	0	0.01	0	0	0	0	0	0	0	0.01	0	0.01	0	0	0	0	0	0.01	0	0
12306	Anxa2	4.72	5.26	5.18	5.31	4.76	5.4	7.21	10.41	6.57	8.2	7.52	10.29	7.15	5.21	20.41	12.82	11.48	40.07	22.44	26.84	30.84	25.43	29.35	22.84	40.52	23.94	19.82	35.16	14.59	19.49	15.34	20.34	22.41	11.93	16.26	15.19	7.08	7.21	6.65	4.84	3.3	3.91	2.63	2.29	2.01
11745	Anxa3	0.33	0.45	0.52	0.7	0.42	0.36	0.27	1	0.71	0.56	1.57	0.74	0.36	0.35	1.94	0.54	0.66	1.26	1.15	0.75	1.52	0.71	4.2	1.31	14.13	1.39	1.13	2.09	0.97	2.07	12.04	1.48	1.55	0.82	0.72	0.48	0.95	1.36	1.05	1.96	0.7	0.28	1.64	0.67	1.3
11746	Anxa4	1.23	0.91	3.91	1.45	1.29	1.02	1.36	2.53	1.97	1.83	2.85	1.74	1.31	1.67	2.56	4.08	3.06	5.14	4.37	5.29	5.96	5.21	7.62	4.81	9.52	6.35	8.43	7.08	7	7.64	10.25	11.41	11.14	13.77	11.57	10.68	8.78	11.47	12.61	6.24	6.62	3.77	7.86	5.73	4.5
11747	Anxa5	2.45	2.16	3.92	2.86	2.46	3.17	3.03	5.67	6.44	4.08	3.28	5.17	3.32	3.32	8.01	3.83	5.94	12.07	8.55	13.22	8.66	10.49	15.04	13.86	17.26	18.22	15.94	17.64	11.73	23.07	20.13	29.52	22.11	21.13	24.23	22.79	20.46	21.81	21.31	16.68	18.76	11.35	17.08	11.85	19.7
11749	Anxa6	2.48	2.52	4.28	3.97	3.68	3.68	3.3	7.85	6.98	4.12	4.54	5.38	4.51	3.11	9.83	6.52	6.35	14.62	11.6	16.29	12.11	11.57	17.57	17.94	23.55	19.45	21.38	16.63	16.42	26.26	23.83	21.58	22.77	19.12	18.16	24.45	20.79	25.02	27.16	18.84	18.76	12.85	14.89	13.1	13.7
11750	Anxa7	0.95	1.34	2.41	1.41	1.58	1.46	1.57	1.45	1.76	1.47	1.34	2.37	1.25	1.31	2.11	1.38	1.12	2.54	1.55	2.58	2.58	1.63	2.7	1.33	3.42	3.37	3.13	2.23	2.2	2.02	2.15	4.72	2.3	2.47	2.84	2.11	1.74	2.74	2.23	2.52	3.01	1.71	3.73	3.29	2.45
11754	Aoc3	0	0	0	0	0	0	0	0	0	0	0	0	0	0	0	0	0	0	0	0	0	0	0.07	0	0	0	0	0	0	0	0	0	0	0.02	0	0.2	0	0	0	0	0	0	0	0	0
72061	Aopep	0	0	0	0	0	0	0	0	0	0	0	0	0	0	0	0	0	0	0	0	0	0	0	0	0	0	0	0	0	0	0	0	0	0	0	0	0	0	0	0	0	0.01	0	0	0
11761	Aox1	0	0	0	0	0	0.01	0.01	0.01	0.01	0	0	0	0	0	0.02	0	0	0.06	0	0.04	0.02	0	0.03	0.01	0	0.02	0.02	0	0.03	0.04	0.12	0	0.19	0	0.03	0.04	0.08	0.06	0.09	0.64	0.17	0.1	1.42	1.43	1.13
71724	Aox3	0	0	0	0	0	0	0	0	0	0	0	0.01	0	0	0.09	0.04	0.11	0.47	0.71	1.65	0.65	0.68	0.71	0.61	0.85	1.84	0.98	1.78	1.5	2.36	1.7	2.75	2.44	2.56	1.51	2.19	2.67	3.4	2.54	8.88	3.27	1.87	20.08	21.23	21.41
213043	Aox3l1	0	0	0	0	0	0	0	0	0	0	0	0	0	0	0	0	0	0.01	0	0	0.01	0	0	0.01	0	0.05	0.02	0	0.02	0.03	0.04	0.05	0.04	0.03	0.02	0.05	0	0	0.02	0.09	0	0.03	0.06	0.06	0.07
71872	Aox4	0	0	0	0	0	0	0	0	0	0	0	0	0	0	0	0	0	0	0	0	0.01	0	0.03	0.02	0	0.04	0.05	0.13	0.12	0.28	0.17	0.19	0.2	0.17	0.09	0.11	0.25	0.18	0.14	0.34	0.26	0.13	0.41	0.33	0.38
11764	Ap1b1	2.25	2	2.42	1.88	1.85	1.92	1.87	2.61	2.72	2.3	1.61	2.67	2.46	2.06	2.37	2.15	2.63	3.78	2.35	2.4	2.29	3.12	3.04	4.67	8.54	5.66	6.4	4.96	8.59	9.93	10.17	8.18	9.41	13.92	6.06	12.32	8.18	8.28	7.5	4.49	4.03	3.67	6.03	3.76	4.91
11765	Ap1g1	0.57	0.91	0.49	0.36	0.46	0.48	0.3	0.32	0.41	0.31	0.5	0.32	0.31	0.61	0.59	0.66	0.27	0.55	0.8	0.82	0.47	0.54	0.41	0.47	1.43	0.85	1.18	1.59	0.91	0.99	1.57	1.01	1.76	2.26	1.38	1.42	1.06	1.37	1.17	1.21	0.66	0.64	1.33	0.95	1.08
11766	Ap1g2	0.04	0.09	0.23	0.07	0.34	0.06	0.07	0.11	0.07	0.06	0.03	0.04	0.11	0.03	0.04	0.03	0.01	0.36	0.02	0	0.01	0	0	0	0.03	0.08	0.02	0	0	0.03	0	0	0.04	0.17	0	0.04	0	0.04	0	0.06	0	0.04	0.02	0	0
11767	Ap1m1	0.43	0.88	1.01	0.87	0.68	0.52	0.5	0.74	0.59	0.78	0.83	0.87	0.65	0.6	0.67	0.8	0.94	1.56	1.05	0.82	0.75	1.41	1.81	1.01	6.72	1.62	2.14	1.87	1.87	1.54	2.36	2.6	2.51	2.46	2.31	1.24	1.22	1.99	1.41	0.69	0.96	0.96	0.8	1.27	1.03
11768	Ap1m2	0	0.23	0.12	0.44	0.11	0	0.07	0.11	0.11	0.19	0.14	0.19	0.02	0.03	0.03	0.28	0.04	0.27	0.36	0.34	0.24	0.7	0.63	0.1	0.14	0.75	0.27	0.81	0.59	0.23	0.57	1.32	0.75	1.07	0.74	0.02	0.42	0.03	0.35	0.28	0.27	0.33	0.2	0.15	0.03
11769	Ap1s1	0.32	0.73	0.43	0.18	0.16	0.44	0.61	0.63	0.59	0.41	0.33	0.47	0.26	0.37	0.03	0.27	0.33	0.12	0.44	0.29	0.13	0.53	0.82	0.34	0.92	0.2	0.71	0.62	0.77	0.5	0.68	0.84	0.71	1.16	1.07	0.43	0.35	0.08	0.11	0.2	0.04	0.19	0.12	0.11	0.07
108012	Ap1s2	0.01	0.08	0.05	0.05	0.08	0.02	0.06	0.05	0.03	0.04	0	0.13	0	0.07	0.03	0	0.02	0.03	0	0.03	0.08	0.07	0.17	0.08	0.13	0.06	0.26	0.12	0.12	0.08	0	0.05	0.2	0.08	0.03	0.23	0.16	0	0	0	0.04	0.05	0	0.11	0.07
252903	Ap1s3	0.01	0.09	0.06	0	0.07	0	0	0	0	0.04	0	0.09	0	0.02	0.03	0	0.03	0.03	0	0.01	0.07	0.03	0.14	0.06	0.14	0.07	0.18	0.02	0.02	0.09	0	0	0.04	0	0.03	0.16	0.09	0	0	0	0.04	0.06	0	0.05	0
11771	Ap2a1	0.96	0.88	2.11	1.09	1.39	0.84	1.84	0.84	1.43	0.51	0.8	2.01	0.88	1.72	1.18	0.7	0.71	1.85	0.61	0.85	1.86	0.58	1.57	0.77	1.68	1.1	1.06	1.41	1.67	1.33	2.45	1.81	1.92	2.03	1.53	1.79	1.48	1.86	1.75	2.82	1.3	1.84	1.43	1.67	1.48
11772	Ap2a2	0.65	0.77	1.01	1.43	1.32	0.98	1.17	1.45	1.41	1.45	1.34	1.86	1.49	1.04	2.04	1.43	1.57	15.37	1.97	1.81	14.61	1.45	2.15	1.7	3.39	3.71	2.96	3.99	3.53	3.16	4.14	3.37	4.4	5.63	4.7	4.75	4.14	4.7	3.82	4.74	3.56	3.13	3.43	7.49	7.1
71770	Ap2b1	1.71	1.59	2.04	1.91	1.55	1.95	1.53	1.97	2.29	1.59	1.43	2.13	1.76	1.72	1.98	1.8	2.05	2.67	2.12	2.35	1.73	1.94	2.41	2.16	4.16	3.06	2.91	2.9	3.61	3.23	4.93	3.97	3.07	4.01	3.82	4.35	3.35	3.29	3.58	2.7	2.4	2.96	2.86	2.52	2.4
11773	Ap2m1	2.34	1.19	1.39	4.83	1.17	3.03	2.74	2.36	1.72	0.5	1.88	2.44	1.81	1.88	2.13	0.9	2	4.02	1.18	3.98	2.26	1.44	3.77	2.09	5.3	2.4	2.92	3.45	11.18	5.49	7.46	5.53	7.54	10.67	4.79	6.63	3.64	4.99	4.99	4.06	2.93	2.34	5.85	2.83	3.03
232910	Ap2s1	1.95	2.17	0.82	2.01	1.13	1.8	0.85	1.81	2.27	1.69	2.17	0.96	0.68	2.29	1.72	2.74	2.04	2.86	1.13	4.25	1.53	1.31	8.12	1.75	7.08	6.45	4.49	6.29	5.68	4.33	8.21	7.36	2.69	8.78	5.76	8.69	2.06	5.62	1.49	4.7	3.03	3.84	4.14	2.62	2.84
11774	Ap3b1	0.21	0.29	0.36	0.2	0.18	0.35	0.24	0.24	0.16	0.19	0.15	0.14	0.16	0.14	0.15	0.14	0.16	0.3	0.19	0.21	0.17	0.1	0.22	0.25	0.4	0.56	0.29	0.41	0.27	0.35	0.34	0.4	0.42	0.3	0.27	0.37	0.13	0.23	0.23	0.18	0.12	0.16	0.19	0.25	0.24
11775	Ap3b2	0.01	0.04	0.01	0.01	0.01	0.01	0.01	0	0.01	0.01	0.01	0.02	0.02	0.02	0	0.01	0	0	0	0	0	0.01	0.02	0.01	0.03	0.04	0	0.02	0	0	0	0	0	0	0	0	0	0	0	0	0	0	0	0	0
11776	Ap3d1	0.06	0.06	0.2	0.61	0.11	0.07	0.08	0.22	0.08	0.35	0.23	0.27	0.27	0.13	0.09	0.1	0.19	0.17	0.31	0.15	0.09	0.3	0.43	0.3	0.25	0.57	0.2	0.37	0.59	0.54	0.28	0.89	0.31	1.51	0.4	0.29	0.1	0.28	0.17	0.29	0.14	0.16	0.21	0.22	0.07
55946	Ap3m1	0.17	0.14	0.19	0.17	0.3	0.28	0.24	0.12	0.11	0.08	0.09	0.2	0.19	0.22	0.19	0.11	0.11	0.12	0.12	0.17	0.34	0.36	0.27	0.16	0.25	0.08	0.48	0.55	1.02	0.24	0.3	0.61	0.35	0.6	0.84	0.95	0.17	0.14	0.1	0.05	0.13	0.09	0.2	0.51	1.06
64933	Ap3m2	0.07	0.08	0.04	0.05	0.02	0.04	0.04	0.02	0.02	0.06	0.04	0.04	0.06	0.02	0.02	0.06	0.05	0.05	0.03	0.07	0.02	0.06	0.04	0.05	0.06	0.06	0	0.05	0.07	0.07	0.2	0.16	0.13	0.05	0.01	0.02	0.09	0.08	0.03	0.03	0.07	0.02	0.06	0.02	0.02
11777	Ap3s1	0.32	0.15	0.35	0.25	0.21	0.52	0.06	3.44	3.25	0.05	1.26	1.52	0.05	0.8	4.24	0.06	2.92	0.29	0.36	0.39	0.03	0.04	0.11	0.3	5.58	0.09	0.27	0.2	0.1	0.13	0.17	0.28	0.2	0.23	3.32	0.11	0.06	0.12	0.28	0.1	0.03	4.02	2.11	4.56	3.12
11778	Ap3s2	0	0	0.04	0	0.04	0.04	0.01	0.01	0.01	0	0	0	0.01	0	0	0	0	0	0.02	0	0	0	0	0	0.01	0	0.06	0.06	0	0	0	0	0	0	0	0	0	0	0	0	0	0.04	0	0	0
67489	Ap4b1	0	0	0	0	0.01	0	0	0	0	0	0	0	0	0	0	0	0	0	0	0	0	0	0	0	0	0	0	0	0	0	0	0	0	0	0	0	0	0	0	0	0	0	0	0	0
108011	Ap4e1	0	0	0.04	0	0.12	0.01	0.09	0.24	0.07	0	0	0	0	0.06	0	0	0.01	0	0	0	0	0	0	0	0.01	0	0	0	0	0	0	0	0.01	0	0	0	0	0.16	0	0	0.01	0	0.11	0	0
11781	Ap4m1	0.04	0.01	0.03	0	0.02	0.05	0	0	0.01	0	0.02	0	0.01	0.01	0.01	0	0.01	0.01	0.1	0	0.02	0.05	0	0.01	0	0	0.01	0.01	0	0.01	0	0	0.04	0.02	0	0	0	0	0	0	0	0	0.34	0	0.01
11782	Ap4s1	0.02	0	0.05	0	0	0.03	0	0.02	0.03	0	0	0.02	0	0	0	0	0	0.04	0	0	0.03	0	0.05	0.03	0	0.05	0.03	0	0	0.05	0.03	0.06	0.04	0.02	0	0.05	0	0.04	0.04	0	0.04	0	0.02	0.03	0.03
381201	Ap5b1	0	0	0	0	0	0	0	0.03	0.05	0	0	0	0	0	0	0	0	0	0	0	0	0	0	0	0	0	0	0	0	0	0	0	0	0	0	0	0	0	0	0	0	0	0	0	0
74385	Ap5m1	0.01	0	0	0	0	0	0	0	0	0	0	0	0	0	0	0	0	0	0	0	0	0	0	0	0	0	0	0	0	0	0	0	0	0	0	0	0	0	0	0	0	0	0	0	0
69596	Ap5s1	0	0	0	0	0	0	0.08	0	0	0	0	0	0.29	0	0	0	0	0	0	0	0	0	0	0	0	0	0	0.03	0	0.01	0.11	0	0	0	0.07	0.01	0	0	0	0.01	0	0	0	0	0
231855	Ap5z1	0	0	0	0.04	0.02	0.01	0	0.01	0.02	0	0	0	0	0	0	0	0	0	0	0	0.02	0	0	0.02	0	0.02	0	0	0.01	0.04	0	0	0.04	0	0	0.07	0	0.05	0.03	0	0	0	0.02	0	0.03
11783	Apaf1	0.02	0.02	0.04	0.05	0.02	0.02	0.03	0.02	0.01	0.04	0.06	0.03	0.01	0.03	0.03	0.02	0.01	0.01	0.02	0.01	0	0.01	0	0.02	0.01	0.02	0.02	0.01	0	0.02	0	0.03	0.06	0	0	0	0	0.01	0	0	0	0	0	0	0
57267	Apba3	0	0	0	0.01	0	0	0	0	0	0	0	0	0	0	0	0	0	0	0	0.01	0	0	0	0.01	0.01	0.02	0.01	0	0	0.01	0	0	0.02	0.02	0	0	0	0	0	0	0	0	0.02	0.02	0.01
54519	Apbb1ip	0.13	0.15	0.31	0.3	0.27	0.33	0.45	0.27	0.33	0.11	0.29	0.18	0.19	0.31	0.26	0.13	0.1	0.09	0.16	0.15	0.24	0.09	0.14	0.16	0.18	0.34	0.26	0.08	0	0.38	0.09	0.14	0.21	0.01	0.05	0.01	0.01	0	0.19	0.02	0	0	0	0	0.01
11789	Apc	0	0	0	0	0	0	0	0	0	0	0	0	0	0	0	0	0	0	0	0	0	0	0	0	0	0	0	0	0.01	0	0	0	0	0	0	0	0	0	0	0	0	0	0	0	0
23805	Apc2	0	0	0	0	0	0	0	0	0	0	0	0	0	0	0	0	0	0	0	0	0	0	0	0	0	0	0	0	0	0	0	0	0	0	0	0	0	0	0	0	0	0	0	0.02	0
20219	Apcs	0	0	0	0	0	0	0	0	0	0	0	0	0	0	0.06	0	0	2.01	0.5	0.6	0.04	0	0.5	0	3.45	1.47	1.74	0.71	0.55	0.51	20.81	0.73	0.21	0	0.09	0.04	0.11	0.14	0.04	0	0	0	0	0	0
235606	Apeh	3.39	2.27	4.56	2.54	2.77	3.7	2.14	2.71	2.96	2.79	1.92	2.56	2.65	2.18	3.08	2.01	2.06	2.96	2.66	3.28	1.52	2.1	2.39	1.61	2.45	2.65	2.43	3.86	4.47	2.21	5.45	2.56	2.43	3.64	3.3	3.15	2.99	3.42	3.76	3.4	2.18	2.18	2.95	2.16	2.15
11792	Apex1	1.53	1.38	6.51	2.08	1.73	2.08	1.33	1.99	1.5	1.42	1.16	1.88	1.39	1.68	2.2	1.25	1.69	2.37	1.98	2.44	2.5	2.13	3.81	1.84	4.2	4.18	3.06	2.5	2.44	1.74	3.08	3.79	2.3	2.35	1.78	1.68	2	3.91	2.15	1.71	2.06	1.29	1.21	0.65	1.08
77622	Apex2	0	0	0	0	0	0	0	0	0	0	0	0	0.01	0.01	0	0	0	0	0	0	0	0	0	0	0	0	0	0	0	0	0	0	0	0	0	0	0	0	0	0	0	0	0	0	0
226548	Aph1a	0.06	0.18	0	0.07	0.04	0	0.3	0	0	0.05	0.05	0	0.43	0	0.27	0.02	0	0	0.03	0.28	0.9	0	2.05	0	0	4.5	0	0.11	0.76	0	4.34	2.49	1.27	2.97	0	0	0	0	0	0	5.04	0	0	1.91	2.29
11800	Api5	2.2	1.9	2.99	1.72	2.1	2.6	1.81	1.57	1.78	1	1.01	1.59	1.46	0.94	0.55	1.06	0.96	1.09	1.03	1.34	0.98	0.89	1.54	0.9	1.34	1.33	1.71	1.11	1.15	1.52	1.3	0.88	1.81	0.71	1.62	0.94	0.92	0.95	1.06	0.6	0.23	0.71	0.37	0.39	0.44
56369	Apip	0.59	0.52	0.81	0.57	0.48	0.36	0.31	0.35	0.67	0.17	0.32	0.44	0.26	0.44	0.41	0.16	0.51	0.52	0.35	0.22	0.18	0.4	0.77	0.28	0.47	0.73	0.59	1.17	0.53	0.8	0.66	1.37	0.74	1.12	1.12	1.51	0.74	1.18	1.08	0.64	0.44	0.6	0.85	1.07	1.55
72103	Aplf	0.55	0	0.14	0.01	0.03	0.04	0.01	0.01	0.03	0	0.01	0.02	0.02	0	0.02	0	0	0	0.01	0	0	0	0	0.01	0	0.02	0	0	0	0	0	0	0	0	0	0	0	0.28	0	0	0	0	0	0	0
11804	Aplp2	0.05	0.02	0.01	0.02	0.12	0.01	0.04	0	0	0.01	0.01	0.01	0.02	0	0	0	0	0	0.03	0	0	0	0	0	0	0.01	0.01	0	0	0	0	0	0	0	0	0	0	0.01	0	0	0	0.02	0.02	0	0
71881	Apmap	0.16	0.22	0.18	0.21	0.15	0.23	0.21	0.26	0.34	0.37	0.37	0.23	0.31	0.21	0.26	0.63	0.42	0.78	0.51	1.34	0.32	1.04	1.12	1.22	3.03	2.47	1.79	1.51	2.21	1.57	2.02	1.46	1.83	3.92	1.92	2.25	1.7	3.17	1.49	1.16	0.56	1.06	0.79	2.46	2.74
11806	Apoa1	9.38	8.34	10.39	8.2	10.8	8.81	7.83	23.35	15.09	9.13	10.73	21.04	2	2.82	41.25	14.79	21.82	63.94	32.55	43.55	47.48	45.88	82.3	67.34	21.42	36.49	46.04	69.43	45.33	123.37	80.81	77.04	84.38	127.25	138.49	101.39	56.74	99.68	76.14	47.76	60.99	65.24	61.65	48.33	68.06
11807	Apoa2	1.16	0.36	0.97	0.65	0.48	0.82	0.7	1.48	1.52	1.29	1.01	2.37	0.5	0.34	4.92	1.07	2.12	3.28	3.22	2.45	2.29	2.86	3.95	3.46	1.37	4.77	4.01	11.53	5.43	11.07	9.5	7.42	9.05	13.45	11.16	13.58	0.02	10.74	16.18	1.07	15.22	12.45	9.66	13.51	14.27
11808	Apoa4	1.94	2.47	2.2	1.6	2.8	1.76	1.29	2.69	2.79	2.31	1.44	4.71	0.23	0.27	6.05	2.34	3.93	3.22	1.58	1.65	1.58	7.16	7.4	13.1	13.94	11.47	12.65	17.65	6.79	16.5	35.16	20.2	12.5	24.09	6.84	3.52	2.11	2.44	2.25	2.58	1.62	2.37	1.25	1.75	2.94
66113	Apoa5	0	0	0	0	0	0	0	0	0	0	0	0	0	0	0	0	0	0.01	0.02	0.02	0.01	0.97	0.8	0.26	1.98	0.2	0.24	0.28	0.14	0.11	0.64	0.31	0.34	0.64	0.39	0.33	0.89	0.3	0.16	0.74	3.3	0.43	0.3	0.48	0.2
238055	Apob	1.34	0.89	0.51	0.46	0.72	0.66	0.53	0.55	0.48	1.13	0.52	0.83	0.1	0.09	0.8	0.42	0.7	0.73	0.69	0.71	0.5	0.66	1.05	0.67	1.08	1.08	1.27	2.17	0.74	1.63	2.06	1.41	1.77	1.24	2.67	1.38	0.95	0.87	1.43	1.65	0.75	2.04	1.07	0.94	0.9
11810	Apobec1	0	0	0	0	0	0	0	0	0	0	0	0	0	0	0	0	0	0	0	0	0	0	0	0	0	0	0	0	0	0	0	0.08	0	0	0	0	0	0	0	0	0	0	0	0	0
80287	Apobec3	0.07	0.25	0.37	0.04	0.65	0.05	0.1	0.04	0.01	0.01	0.06	0.06	0.07	0.17	0.02	0.01	0	0.07	0.1	0.08	0.03	0.05	0.02	0	0.02	0.02	0.07	0	0	0	0	0	0	0	0	0	0	0	0	0	0	0	0	0	0
171504	Apobr	0	0	0	0	0	0	0.01	0.02	0.02	0.01	0.01	0.01	0.01	0	0.01	0.03	0.03	0.02	0.01	0.03	0.01	0	0.03	0.05	0	0.02	0.02	0.01	0.06	0.07	0.03	0.07	0.01	0	0	0	0	0	0	0	0	0	0	0	0
11812	Apoc1	0.11	0	0	0	2.27	0	0.11	0	0.33	0.7	0.11	0.5	0	0.09	0.31	0	0.27	1.34	0.52	2.27	0	1.03	1.41	0.18	3.07	2.58	1.33	16.8	2.38	4.29	12.33	6.61	6.88	16.99	27.77	8.22	15.45	8.1	5.81	7.64	18.32	12.24	8.59	6.51	5.57
11813	Apoc2	0	0	0	0	0	0	0.05	0	0.14	0	0	0.22	0.82	0	0.16	0	0.1	2.19	1.02	0.92	0	1.11	2.74	2.84	1.38	0	0.8	6.21	0.88	3.05	4.25	1.07	1.28	2.07	6.71	0.89	0	0	0	0.61	0.73	0	1.91	0.52	0.56
11814	Apoc3	0	0	0	0	0	0	0	0	0	0	0	0	0	0	0	0	0	28.64	0.25	0.34	0	0.42	0	0.55	0.03	0	0.14	2.38	11.31	0.88	3.94	1.14	1.19	0.84	0.96	1.65	14.85	6.65	3.63	2.17	5.08	19.06	3.77	5.13	3.91
11425	Apoc4	0	0	0	0	0	0	0	0	0	0	0	0	0	0	0.15	0	0	0	0.14	0	0.27	0.19	0.28	0.24	0	0.84	1.13	0	1.34	1.4	0.72	0.9	0.56	0.95	3.99	0	0.55	0	1.95	1.69	0	1.8	1.76	0	0
11815	Apod	0	0	0	0	0	0	0	0	0	0	0	0	0	0	0	0	0	0	0	0	0	0	0	0	0	0	0	0	0	0	0	0.61	0	0.15	0	0	0	0	0	0	0	0	0	0.07	0
11816	Apoe	2.75	3.36	3.18	2.2	3.39	3.36	2.78	6.14	4.81	6.67	2.82	8.83	1.57	1.35	11.28	5.98	5.85	15.59	14.34	16.18	11.64	19.26	27.1	16.37	18.42	21.54	30.76	38.52	31.35	36.81	45.95	43.85	45.68	60.6	96.73	69.85	22.68	28.41	18.35	22.12	25.54	17.22	13.44	23.6	19.63
103161	Apof	0	0	0	0	0	0	0.01	0	0	0	0	0	0	0	0.03	0.01	0	0.04	0	0	0	0.06	0	0.04	0.23	0.28	0.09	0.11	0.03	0.25	0.21	0.09	0.11	0.16	0	0.13	0.31	0.1	0.2	0	0.05	0	0.05	0.06	0.04
11818	Apoh	0	0.01	0	0.03	0.05	0.01	0.29	0.82	0.57	0.71	0.79	0.8	0.6	0.09	3.52	1.52	1.69	10.78	8.43	6.08	5.23	4.06	6.54	3.6	5.47	5.77	4.93	9.73	4.7	5.22	8.94	3.91	4.79	6.72	4.18	3.53	4.48	5.82	3.76	4.12	3.46	3.58	6.23	2.69	3.03
75761	Apol7a	0	0	0	0	0	0	0	0	0	0	0	0	0	0	0	0	0	0	0	0	0	0	0	0	0	0	0	0	0	0	0	0	0	0	0	0	0.82	0	0	0	0	0	0	0	0
239552	Apol8	0.01	0	0.01	0.03	0.04	0.02	0	0.03	0.04	0	0.01	0	0.03	0.02	0.05	0.01	0.07	0	0	0	0	0	0	0	0	0	0	0	0	0	0	0	0	0	0	0	0	0	0	0	0	0	0	0	0
223672	Apol9a	0	0	0	0	0	0	0	0	0	0	0.02	0	0	0	0	0	0	0	0	0	0	0	0	0	0	0	0	0	0	0	0	0	0	0	0	0	0.02	0	0.1	0.12	0.09	0.3	0.24	0.13	0.05
71898	Apol9b	0	0	0	0	0	0	0	0	0	0	0.02	0	0	0	0	0	0	0	0	0	0	0	0	0	0	0	0	0	0	0	0	0	0	0	0	0	0.02	0	0.03	0.24	7.61	6.19	0.25	0.24	0.12
381823	Apold1	0	0	0	0	0	0	0	0	0	0	0	0	0	0	0	0	0	0	0	0	0	0	0	0	0	0.26	0	0	0	0	0	0	0	0	0	0	0	0	0	0	0	0	0	0	0
55938	Apom	0.18	0.31	0.13	0.73	0.59	0.24	0.76	0.45	0.72	0.19	0.39	1.08	0.35	0.19	0.39	0.24	1.16	1.21	0.45	0.87	0.19	0	0	0.01	0	12.53	1.39	0.05	0.54	7.8	0	0	0	0	0.61	0	0	0	0.19	0	0	0	0	0	0
28194	Apon	0	0	0	0	0	0	0	0	0	0	0	0	0	0	0	0	0	0	0	0	0	0	0	0	0	0	0	0	0	0	0	0	0	0	0	0	0.1	0.02	0	0	0	0	0	0.01	0
68316	Apoo	0.13	0.18	0.34	0.11	0.64	5.07	0.11	19.19	1.51	0.05	0.18	0.15	0.16	0.76	0.16	0.05	0.13	0.22	0.15	3.15	12.68	0.15	0.55	0.18	1.03	3.21	2.71	2.35	0.34	0.79	1.11	1.12	0.47	0.87	0.61	1.24	1.66	1.58	1.36	1.38	1.43	1.12	1.32	1.81	2.12
68117	Apool	0.14	0.33	0.46	0.54	0.62	0.8	0.71	0.72	0.65	0.31	0.68	0.47	0.36	0.39	1.1	0.83	0.75	1.52	1.25	0.98	1.64	0.94	1.92	1.43	2.24	3.44	1.93	4.04	2.23	3.07	3.89	4.01	3.58	6.49	4.74	3.98	3.87	3.02	3.03	3.19	2.29	2	1.94	1.99	3.27
11820	App	0	0	0	0	0	0	0	0	0	0	0	0.01	0.01	0	0	0	0	0.01	0	0.01	0	0	0	0.01	0	0	0.02	0	0.01	0.01	0.02	0.06	0.02	0.05	0	0.01	0	0	0	0	0	0	0	0.01	0.01
66884	Appbp2	0.01	0	0	0.03	0.01	0.03	0	0	0	0	0	0	0	0.01	0	0	0	0	0	0.01	0	0	0	0	0	0	0	0	0	0	0.02	0	0	0	0	0	0	0	0	0	0	0	0	0	0
72993	Appl1	0.02	0.01	0.43	0.36	0.02	0.07	0.32	0.33	0.34	0.02	0.02	0.44	0.09	0.1	0.04	0.06	0.55	0.25	0.45	0.51	0.04	0.07	0.48	0.11	0.1	0.27	0.15	0.54	0.6	0.44	0.51	0.69	0.35	0.13	0.29	0.51	0.25	0.32	0.19	0.56	0.61	0.16	0.14	0.23	0.07
216190	Appl2	0.01	0	0.05	0	0.02	0.01	0.01	0.04	0.03	0	0	0.03	0.01	0.02	0.04	0.06	0.04	0.11	0.09	0.07	0.03	0.04	0.08	0.05	0.06	0.07	0.06	0.05	0.04	0.08	0.06	0.05	0.05	0.03	0.14	0.19	0.04	0.1	0.03	0.09	0.21	0.01	0.01	0.22	0.05
11821	Aprt	2.64	3.48	5.92	2.23	4.23	3.9	1.86	4.08	5.72	2.5	1.85	8.32	2.29	1.57	10.91	3.35	2.6	24.51	11.51	13.39	12.69	7.64	11.29	13.87	15.07	9.99	19.52	9.93	4.84	9.28	6.16	3.15	6.39	4.14	1.91	1.99	1.34	1.76	2.6	1.06	0.94	1.01	0.77	1.11	0.92
66408	Aptx	0	0	0.08	0.01	0.01	0	0.15	0	0	0	0	0.01	0	0	0	0	0	0	0	0	0	0	0	0	0	0	0	0	0	0	0	0	0.06	0	0	0	0	0	0	0	0	0	0	0	0
11826	Aqp1	0.24	0.13	0.15	0.04	0.33	0	1.4	1.07	0.79	0.8	0.03	0.75	0.76	0.76	0.86	0.13	0.87	0.89	1.42	1.06	0.7	2.16	3	1.32	2.37	2.91	1.95	3.47	3.19	2.49	3.65	4.1	5.28	3.53	3.81	6.25	2.58	3.29	6.86	2.49	3.65	2.3	2.02	5.01	2.49
66333	Aqp11	0.01	0	0	0.01	0	0	0.02	0	0	0.01	0.03	0.05	0	0.01	0	0	0.02	0.2	0.07	0.04	0.11	0.02	0	0	0.03	0	0.46	0.08	0.07	0.08	0.03	0.1	0.34	0.09	0.07	0.15	0.08	0.14	0.08	0.13	0.04	0.04	0.06	0.11	0.11
11828	Aqp3	0.26	0.2	0	0	0.73	0.11	0	0	0.67	0.05	0.03	0	0.09	0.03	0.03	0.08	0.06	0	0.01	0	0	0	0	0	0	0	0.06	0	0	0	0	0	0	0	0	0	0	0	0	0	0	0	0	0	0
11833	Aqp8	0	0	0	0	0	0	0	0.05	0.01	0	0	0	0	0	0.1	0.04	0.11	0.19	0.17	0.19	0.18	0	0	0.03	0	0	0.01	0	0	0	0	0	0	0	0	0	0	0	0.08	0	0	0	0.16	0.15	0.09
64008	Aqp9	0	0	0	0	0	0	0	0	0	0	0	0	0	0	0	0	0	0	0	0	0	0	0.09	0.08	0	0.1	0.08	0	0.1	0.27	0.31	0.47	0.23	0.5	0.6	0.26	0.27	0.27	0.37	0.15	0.18	0	0.35	0.28	0.33
11834	Aqr	0.31	0.2	0.24	0.16	0.17	0.26	0.13	0.09	0.12	0.08	0.06	0.25	0.16	0.09	0.14	0.12	0.08	0.04	0.14	0.02	0.04	0.08	0.06	0.03	0.09	0.18	0.07	0.03	0.03	0.02	0.03	0	0.02	0.02	0.08	0	0.03	0.01	0.09	0.02	0.01	0	0.01	0.01	0
11835	Ar	0	0	0.41	0	0	0	0	0	0	0	0	0	0	0	0	0	0	0	0	0	0	0	0	0	0	0	0	0	0	0	0	0	0	0	0	0	0	0	0	0	0	0	0	0	0
11836	Araf	0.03	0.06	0.05	0.06	0.05	0.07	0.06	0.1	0.06	0.04	0.06	0.12	0.06	0.1	0.39	0.1	0.08	0.15	0.09	0.4	0.08	0.09	0.18	0.09	0.26	0.19	0.11	0.22	0.2	0.2	0.47	0.28	0.64	0.25	0.43	0.27	0.14	0.25	0.37	0.23	0.22	0.28	0.37	0.15	0.23
69710	Arap1	0.03	0.01	0.04	0.02	0.03	0.03	0.02	0.04	0.02	0.01	0.01	0.03	0.01	0.01	0.02	0.01	0.01	0.32	0.03	0.56	0.03	0.01	0.51	0.21	0.04	0.15	0.06	0.04	0.06	0.25	0.04	0.05	0.09	0.23	0.07	0.32	0.01	0.01	0.01	0	0	0.01	0.03	0	0.07
106952	Arap3	0	0	0.01	0	0.01	0	0	0	0	0	0	0	0	0	0	0	0	0	0	0	0	0	0	0	0	0	0	0	0	0	0.01	0	0	0	0	0	0	0	0	0	0	0	0	0	0
213827	Arcn1	3.5	3.04	5.38	2.3	2.72	3.35	2.32	3.7	3.31	3.19	2.31	3.94	4.02	2.62	3.24	3.01	3.47	5.58	4.4	4.35	5.51	4.8	5.06	4.7	9.62	6.26	7.28	8.6	6.14	9.49	9.19	8.35	7.75	7.83	7.66	8.14	5.96	5.34	7.47	4.61	2.41	4.36	3.85	3.7	3.42
11840	Arf1	6.16	7.96	5.63	7.66	7.88	9.87	10.1	12.02	12.74	6.75	10.35	12.47	8.85	5.81	14.37	9.25	8.46	18.99	10.77	17.12	20.28	8.04	20.48	14.35	19.61	21.58	21.76	23.7	20.17	26.66	16.93	29.34	27.3	27.83	19.16	27.02	14.58	22.48	22.53	15.46	12.17	12.09	14.99	13.54	13.2
11841	Arf2	2.81	5.36	4.11	4.02	3.66	3.48	4.15	6.17	6.32	4.36	3.68	5.98	4.49	2.51	9	7.31	5.67	9.32	6.87	7.49	9.99	5.67	10.19	6.02	13.52	11.98	10.35	11.77	10.57	14.88	11.53	17.06	15.24	14.79	10.36	13.96	5.54	9.19	11.8	7.91	6.36	4.75	4.8	5.93	8.51
11842	Arf3	6.16	7.96	5.63	7.66	7.88	9.87	10.1	12.02	12.74	6.75	10.35	12.47	8.85	5.81	14.37	9.25	8.46	18.99	10.77	17.12	20.28	8.04	20.48	14.35	19.61	21.58	21.72	23.7	20.17	26.66	16.93	29.34	27.3	27.83	19.16	27.02	14.58	22.48	22.53	15.46	12.17	12.09	14.99	13.54	13.2
11843	Arf4	2.68	4.9	4.07	4.03	4.32	3.84	4.65	6.29	6.25	3.94	3.58	5.39	5.1	2.88	8.33	7.75	6.06	7.68	5.4	6.49	8.91	4.48	5.05	6.94	17.89	14.85	11.58	11.82	14.35	18	12.37	17.85	11.91	13.79	9.75	15.08	7.84	15.3	8.19	6.44	10.55	4.62	5.56	8.45	6.06
11844	Arf5	6.03	7.52	7.24	8.53	8.76	11.39	11.86	13.15	12.76	6.07	12.34	12.44	9.78	7.72	12.92	7.97	7.88	15.18	6.92	15.34	17.34	5.71	16.73	13.3	14.37	19.2	18.81	19.23	18.99	23.6	13.27	27.51	21.42	22.77	17.87	24.91	14.28	24.25	18.97	13.05	12.2	12.77	15.03	14.08	12.07
11845	Arf6	1.1	1.15	1.49	2.51	1.72	2.28	0.89	1.42	1.68	1.02	1.1	1.32	1.85	1.17	1.2	1	1.14	2.99	1.66	3	1.59	1.75	3.39	3.01	5.1	4.24	5.54	2.72	4.26	6.79	9.66	9.65	9.68	8.48	6.69	13.62	6.25	10.85	7.05	4.01	10	4.36	9.12	11.22	10.09
228998	Arfgap1	0.26	0.24	0.31	0.49	0.24	0.19	0.23	0.34	0.23	0.15	0.65	0.59	0.09	0.38	0.44	0.29	0.79	0.5	0.32	0.35	0.27	0.85	1.02	0.28	0.31	0.78	0.22	0.27	0.2	0.71	0.22	0.29	0.5	0.7	0.34	0.57	0.2	0.25	0.48	0.13	0.26	0.05	0.15	0.27	0.22
77038	Arfgap2	0.51	0.54	0.98	0.48	0.4	0.55	0.56	1.42	0.45	0.56	0.46	0.65	0.47	0.27	0.99	0.11	0.69	1.06	1.19	0.81	0.76	0.36	1.25	1.14	1.5	2.05	1.5	1.22	0.95	1.61	1.39	1.28	1.87	1.75	2.14	1.88	2.02	2.56	1.91	1.38	2.32	1.92	1.45	2.5	1.56
66251	Arfgap3	0.08	0.08	0.02	0.07	0.16	0.11	0.06	0.14	0.12	0.1	0.09	0.07	0.07	0.02	0.16	0.08	0.09	0.09	0.08	0.1	0.09	0.03	0.08	0.16	0.12	0.08	0.35	0.09	0.13	0.03	0.06	0.11	0.27	0.06	0.33	0.12	0.06	0.03	0.06	0	0.19	0.21	0.22	0.46	0.37
211673	Arfgef1	0.03	0.05	0.06	0.03	0.02	0.07	0.05	0.05	0.06	0.04	0.04	0.11	0.04	0.11	0.06	0.05	0.05	0.06	0.04	0.15	0.05	0.05	0.09	0.09	0.03	0.1	0.08	0.13	0.04	0.13	0.16	0.14	0.08	0.06	0.11	0.28	0.08	0.23	0.08	0.05	0.05	0.03	0.15	0.1	0.13
99371	Arfgef2	0.16	0.23	0.09	0.09	0.08	0.04	0.08	0.06	0.15	0.07	0.04	0.25	0.13	0.08	0.14	0.14	0.01	0.08	0.06	0.15	0.05	0.09	0.22	0.05	0.05	0.04	0.19	0.15	0.36	0.07	0.09	0.06	0.12	0.14	0.1	0.59	0.08	0.27	0.21	0.02	0.02	0.21	1.97	0.1	0.16
99889	Arfip1	0.2	0.74	0.86	0.13	0.23	0.53	0.22	0.52	0.18	0.15	0.06	0.17	0.11	0.08	0.54	0.16	0.16	0.42	0.25	0.2	0.22	0.17	0.32	0.22	0.55	0.21	0.24	0.23	0.94	0.49	0.24	0.59	0.24	0.15	2.44	0.56	0.17	0.44	0.39	0.05	0.19	0.21	0.2	0.37	0.28
76932	Arfip2	0	0.05	0.07	0	0.03	0.08	0	0.01	0.03	0	0	0.01	0.03	0.07	0	0	0	0	0.06	0	0	0	0.09	0	0.33	0	0	0	0.03	0	0	0	0	0	0.03	0	0	0	0	0	0	0.02	0	0	0
76688	Arfrp1	0.06	0	0.26	0	0.32	0.08	0	0.31	0.16	0.01	0.01	0.12	0	0.02	0.02	0	0.03	0.08	0.02	0	0	0	0	0.1	0.01	0	0.09	0	0.02	0.17	0	0	0	0.03	0	0	0	0	0.03	0	0	0	0	0	0
11846	Arg1	0.05	0.04	0.03	0.02	0.12	0.07	0.33	5.04	1.6	2.22	1.29	3.16	1.04	0.95	12.37	4.12	6.4	41.91	46.46	35.8	30.69	60.93	208.84	133.06	388.79	166.58	180.86	128.8	100.02	110.6	770.74	142.13	107.31	218.56	212.99	209.13	652.86	579.85	666.45	897.75	416.32	541.24	484	522.82	512.17
234023	Arglu1	0	0.33	0.03	2.07	0.51	1.77	1.56	0.59	0.18	0	0.85	0.12	0.15	0.53	0	0.14	0	0.16	0	0.16	0.15	0	0.39	0.71	0.32	0.49	0.19	0.39	0	1.59	0	1.09	0.23	0.52	0	0	0.25	0.2	0.6	0	0	0	0.14	0.13	0
228359	Arhgap1	0.77	0.52	1.21	0.66	0.84	0.94	0.67	1.15	1.45	0.34	0.53	0.75	0.39	0.35	0.94	0.51	0.71	1.29	0.73	0.98	0.98	0.59	1.39	1	0.51	1.56	1.3	1.09	1.09	1.66	1.21	1.29	1.75	0.92	0.92	0.61	0.38	0.53	0.47	0.25	0.28	0.18	0.15	0.27	0.21
78514	Arhgap10	0.02	0	0.01	0	0	0	0	0	0	0	0	0.01	0	0	0	0	0	0.01	0	0	0.18	0	0	0.01	0.02	0	0.01	0	0	0	0	0	0.14	0	0	0	0	0	0	0	0	0	0	0	0
228482	Arhgap11a	0.01	0.01	0	0	0	0	0	0	0	0	0	0	0	0	0	0	0	0	0	0	0	0	0	0	0	0	0	0	0	0	0	0	0	0	0	0	0	0	0	0	0	0	0	0	0
75415	Arhgap12	0	0	0	0	0.01	0	0	0	0.01	0	0	0	0	0	0	0	0	0.01	0	0	0	0	0.05	0.01	0.06	0	0	0	0	0	0.1	0	0	0.07	0.02	0	0	0	0.02	0	0	0	0.01	0.01	0.01
76117	Arhgap15	0	0	0	0	0	0	0.01	0	0	0	0.03	0	0	0	0	0	0	0	0	0	0	0	0	0	0	0	0	0	0.01	0	0	0.01	0	0	0	0	0	0	0	0	0	0	0	0	0
70497	Arhgap17	0.17	0.06	0.19	0.5	0.28	0.1	0.31	0.12	0.11	0.15	0.1	0.26	0.15	0.17	0.24	0.09	0.14	0.24	0.04	0.12	0.03	0.24	0.13	0.28	1.01	1.54	0.5	0.58	0.12	0.18	0.67	0.19	0.17	0.37	0.3	0.03	0.59	0	0.02	0.06	0.66	0.05	0.66	0.78	0.56
73910	Arhgap18	0.01	0.01	0.04	0.03	0.02	0.04	0.36	0.03	0.07	0.03	0.02	0.15	0.08	0.02	0.01	0.01	0.08	0.08	0.03	0.08	0.01	0	0.39	0.06	0.04	0.14	0.07	0.21	0.07	0.09	0.62	0.17	0.09	0.14	0.23	0	0.12	0.19	0	0.04	0	0	0	0	0.01
71085	Arhgap19	0.03	0.01	0.31	0.01	0.01	0.01	0	0.49	0	0	0	0	0	0	0	0	0	0	0	0	0	0	0	0	0	0	0	0	0	0	0	0	0	0	0	0	0	0	0	0	0	0	0	0	0
71435	Arhgap21	0	0	0.06	0	0	0	0	0	0	0	0	0	0	0.01	0	0	0	0	0	0	0	0	0	0	0	0	0	0	0	0	0	0	0	0	0	0	0	0	0	0	0	0	0	0	0
239027	Arhgap22	0	0	0	0	0	0	0	0	0	0	0	0	0	0	0	0	0	0	0	0	0	0	0	0	0	0	0.09	0	0	0	0	0	0	0	0	0	0	0	0	0	0	0	0	0	0
58996	Arhgap23	0.02	0.01	0.03	0	0	0	0	0	0	0.01	0.01	0	0.02	0	0	0	0	0	0	0	0	0	0	0	0	0	0	0	0	0	0	0	0	0	0	0	0	0	0	0	0	0	0	0	0
231532	Arhgap24	0	0	0	0	0	0	0	0	0	0	0	0	0	0	0	0	0	0	0	0	0	0	0	0	0	0	0	0	0.01	0	0	0	0	0.01	0	0	0	0	0	0	0	0	0	0	0
232201	Arhgap25	0.01	0	0.03	0	0.03	0	0	0.01	0.02	0.04	0	0.07	0.02	0.01	0.02	0.02	0.06	0.01	0.03	0.06	0	0.03	0.08	0.03	0.08	0.03	0.06	0.03	0.01	0.03	0.01	0.22	0.02	0	0	0	0	0	0	0	0	0	0	0	0
71302	Arhgap26	0	0	0	0	0	0	0	0	0	0	0	0	0	0	0	0	0	0	0	0	0	0	0	0	0	0	0	0	0	0	0.01	0	0	0	0	0	0	0	0	0	0	0	0	0	0
544817	Arhgap27	0	0	0	0	0	0	0	0	0	0	0	0	0	0	0	0	0	0	0.01	0	0	0	0	0	0.01	0	0.01	0.01	0	0.01	0.01	0.01	0.01	0	0	0	0	0	0	0	0	0	0	0	0
268970	Arhgap28	0	0.02	0.06	0	0	0	0.03	0	0	0	0	0	0	0	0	0	0	0	0	0	0	0	0	0	0	0	0	0	0	0	0	0	0	0	0	0	0	0	0	0	0	0	0	0	0
214137	Arhgap29	0	0	0	0	0	0	0	0	0.01	0	0	0	0	0	0	0	0	0	0.01	0	0	0	0.05	0	0.02	0.04	0	0.13	0	0.02	0.12	0.07	0.03	0.05	0	0.02	0	0.04	0	0.01	0	0.05	0.03	0.01	0.01
226652	Arhgap30	0	0	0	0.01	0	0	0	0.01	0.01	0	0	0	0	0	0	0	0	0	0	0	0	0	0	0	0	0	0.02	0	0.01	0	0	0	0	0	0	0	0	0	0	0	0	0	0	0	0.01
12549	Arhgap31	0	0	0	0	0	0.04	0	0	0	0	0	0	0	0	0	0	0	0	0	0	0	0	0.01	0.01	0	0	0	0	0.01	0.01	0	0	0	0	0	0	0	0	0.01	0	0	0	0	0	0
330914	Arhgap32	0	0	0	0	0	0	0	0	0	0	0	0	0	0	0	0	0	0	0	0	0	0	0	0	0	0	0	0	0	0	0	0	0	0	0	0	0	0.14	0	0	0	0	0	0	0
232906	Arhgap35	0	0	0	0	0	0	0	0.09	0	0	0	0.01	0	0.01	0.01	0.06	0.01	0.1	0.01	0.01	0.04	0	0.01	0.01	0.02	0.01	0.01	0.03	0.06	0.01	0.01	0.02	0.03	0.49	0.14	0.05	0.04	0.01	0.01	0.06	0.02	0.04	0.03	0.02	0.04
171207	Arhgap4	0	0	0.05	0	0.05	0.07	0.01	0.17	0.01	0.01	0	0.21	0	0	0.38	0.01	0	0.04	0.56	0.05	0.25	0	0	0.21	0.02	0.04	0.06	0.04	0.07	2	0	0.11	0.73	0	0.12	0	0	0	0	0	0	0	0	0	0
71544	Arhgap42	0	0	0	0	0	0.01	0	0	0	0.02	0	0.02	0	0	0.02	0	0	0.01	0	0	0	0	0.36	0	0	0	0.02	0	0	0	0	0	0.01	0.45	0	0.01	0	0.23	0	0	0	0	0.2	0.21	0.12
70719	Arhgap45	0.08	0.07	0.16	0.04	0.05	0.09	0.1	0.11	0.08	0.11	0.06	0.12	0.08	0.08	0.14	0.05	0.09	0.1	0.06	0.11	0.14	0.05	0.02	0.07	0.12	0.05	0.07	0.16	0.07	0.06	0.09	0.03	0.1	0.04	0.01	0.01	0.02	0.01	0	0.01	0	0	0	0.04	0.02
11855	Arhgap5	0.01	0.01	0.01	0.01	0.02	0.01	0	0.02	0.01	0.01	0	0.01	0	0	0.03	0.01	0.08	0.04	0.05	0.02	0.03	0.03	0.07	0.05	0.05	0.07	0.06	0.04	0.09	0.03	0.2	0.05	0.05	0.04	0.04	0.04	0.05	0.04	0.04	0.01	0.01	0.06	0.01	0.04	0.01
11856	Arhgap6	0	0	0	0	0	0	0	0.01	0	0	0	0	0	0	0	0	0	0	0	0	0	0	0	0	0.01	0	0	0	0	0	0	0	0	0	0	0	0	0	0	0	0	0	0	0	0
216445	Arhgap9	0.01	0	0	0	0	0.01	0.01	0.01	0	0	0.04	0	0.02	0	0	0.02	0	0.01	0.01	0.01	0	0.01	0	0	0.01	0	0.02	0	0.71	0	0	0.01	0.02	0.01	0	0	0	0	0	0	0	0	0	0	0
192662	Arhgdia	12.74	9.76	23.5	11.6	12.47	12.4	17.09	15.22	14.89	11.11	9.2	13.15	9.64	11.39	13.75	9.25	10.52	21.52	11.2	19.18	10.4	13.96	24.09	17.71	25.08	36.2	24.98	21.35	24.45	28.33	19.12	37.6	28.21	24.67	17.21	21.1	17	25.56	16.87	9.38	15.56	10.11	9.49	10.58	9.12
11857	Arhgdib	1.13	1	2.2	1.51	1.05	1.26	1.7	3.34	2.7	2.21	1.48	1.77	1.33	1.46	3.51	1.05	2.53	4.24	2.02	6.81	2.75	2.93	3.1	3.67	2.55	4.42	2.18	2.4	2.85	4.2	2.22	6.54	3.99	1.75	1.57	1.54	0.57	0.65	0.99	0.06	0.6	0.27	0.26	0.47	0.23
16801	Arhgef1	0.42	0.44	0.42	0.26	0.25	0.43	0.26	0.32	0.25	0.3	0.24	0.36	0.29	0.2	0.21	0.23	0.18	0.3	1.05	0.27	0.38	0.18	0.29	0.13	0.29	0.41	0.21	0.23	0.52	0.87	0.27	0.47	0.43	0.21	0.5	0.16	0.1	0.09	0.51	0.28	0.06	0.64	1.06	0.18	0.21
72754	Arhgef10l	0	0	0	0	0	0	0	0	0	0	0	0	0	0	0	0	0	0	0	0.02	0	0	0.01	0	0.01	0.02	0.02	0	0.01	0.14	0.02	0.16	0.04	0.01	0.03	0.01	0.04	0.01	0.02	0.01	0.01	0	0.02	0.01	0.01
213498	Arhgef11	0	0	0	0	0	0	0	0.02	0.03	0	0	0	0	0	0	0	0	0.01	0	0	0	0	0.01	0.02	0	0	0	0	0.01	0.01	0	0	0.08	0.01	0.01	0.01	0	0.03	0.01	0	0	0	0.05	0.04	0
69632	Arhgef12	0	0	0	0	0	0.02	0	0.01	0	0.01	0	0.01	0	0.01	0.01	0.01	0.01	0.02	0.01	0.01	0.02	0.01	0.05	0.02	0.14	0.07	0.15	0.12	0.03	0.05	0.08	0.03	0.07	0.14	0.1	0.14	0.52	0.11	0.1	0.21	0.01	0.13	0.15	0.24	0.06
442801	Arhgef15	0	0	0	0	0	0	0	0	0	0	0	0	0	0	0	0	0	0	0	0	0	0	0	0	0	0	0.05	0	0	0	0	0	0	0	0	0	0	0	0	0	0	0	0	0	0
230972	Arhgef16	0	0.13	0	0	0	0	0	0	0	0.01	0.09	0	0	0.09	0.01	0.01	0.01	0.01	0	0	0	0.01	0	0.01	0.01	0	0	0	0.01	0.01	0	0	0	0	0	0	0	0	0	0	0	0	0	0	0
207212	Arhgef17	0	0	0	0	0	0	0	0.01	0	0	0	0	0	0	0	0	0	0	0	0	0.06	0	0	0	0	0	0	0	0	0	0	0	0	0	0	0	0	0	0	0	0	0	0	0	0
102098	Arhgef18	0.01	0	0	0.08	0.08	0.12	0.05	0.06	0	0.05	0.04	0	0	0	0.01	0.04	0.09	0.01	0	0.05	0	0.06	0.06	0	0.08	0	0	0	0	0	0	0	0	0	0	0	0.52	0	0.06	0	0	0	0	0.08	0
16800	Arhgef2	0.05	0.08	0.99	0.36	0.29	0.57	0.23	0.11	0.06	0.13	0.19	0.28	0.07	0.13	0.14	0.05	0.08	0.23	0.03	0.63	0.09	0.48	0.88	0.03	0.21	0.07	0.23	1	0.06	0.04	0.04	0.2	0.12	0.02	0	0	0	0	0	0	0	0	0	0	0
52666	Arhgef25	0	0	0.03	0	0	0	0	0	0	0	0	0.02	0	0	0	0	0	0	0	0	0	0	0	0	0	0	0	0	0	0	0	0	0	0	0	0	0	0	0	0	0	0	0	0	0
622434	Arhgef26	0	0	0	0	0	0	0	0	0	0	0	0	0	0	0	0	0	0	0	0	0	0	0	0	0	0	0	0	0	0	0	0	0	0	0	0	0	0	0	0	0	0	0	0	0.01
110596	Arhgef28	0	0	0	0	0	0	0	0	0	0	0	0	0	0	0	0	0	0	0	0	0	0	0	0.01	0	0	0	0	0	0	0	0	0	0	0	0	0	0	0	0	0	0	0	0	0
71704	Arhgef3	0	0	0	0	0	0	0	0.01	0	0	0	0	0	0	0	0	0	0	0	0	0	0	0	0	0	0	0	0	0	0	0	0	0	0	0	0	0	0	0	0	0	0	0	0	0
328967	Arhgef37	0	0	0	0	0	0	0	0	0	0	0	0	0	0	0	0	0	0	0	0	0	0	0	0	0	0	0	0	0	0	0	0	0	0	0	0	0	0	0	0	0	0.01	0	0	0
268739	Arhgef40	0.01	0.12	0.06	0	0.01	0.07	0	0.01	0.02	0.02	0.01	0.01	0.03	0.02	0	0.08	0.01	0	0	0	0	0.04	0.03	0	0.15	0	0	0	0	0.01	0	0.03	0	0	0	0	0.01	0	0	0	0	0	0	0.01	0
73341	Arhgef6	0.02	0.03	0	0.01	0.01	0.01	0.26	0.02	0	0.03	0	0.02	0.01	0.01	0.02	0.03	0.03	0.03	0.05	0.02	0.01	0.09	0.03	0.04	0.06	0.06	0.08	0.05	0.04	0.03	0.01	0.03	0	0.02	0.05	0.03	0.01	0	0.01	0.21	0.01	0	0	0.01	0
54126	Arhgef7	0.05	0.16	0.15	0.04	0.07	0.21	0.01	0.14	0.03	0.05	0.05	0.13	0.09	0.04	0.18	0.04	0.01	0.19	0.08	0.08	0.15	0.08	0.28	0.06	0.11	0.08	0.07	0.11	0.14	0.12	0.04	0.11	0.35	0.18	0.07	0.07	0.04	0.03	0.05	0.02	0.01	0.01	0.01	0.24	0
93760	Arid1a	0.12	0.08	0.36	0.09	0.14	0.25	0.09	0.06	0.09	0.07	0.08	0.08	0.09	0.05	0.11	0.04	0.05	0.09	0.02	0.03	0.03	0.07	0.04	0.1	0.03	0.03	0.12	0.06	0.02	0.03	0.03	0.01	0.1	0.02	0.05	0	0	0.01	0.01	0	0	0	0	0	0
239985	Arid1b	0.04	0.03	0.14	0.02	0.06	0.12	0.01	0.01	0.01	0.01	0.01	0.01	0.01	0.01	0	0.01	0.02	0.01	0.06	0	0	0	0	0	0.06	0.01	0.01	0.04	0	0.01	0.02	0.01	0.02	0.07	0.01	0	0.04	0	0.01	0	0	0.01	0	0	0
77044	Arid2	0.05	0.03	0.09	0.03	0.03	0.05	0.04	0.02	0.02	0.01	0.02	0.08	0.01	0.04	0.01	0	0.01	0.01	0.56	0	0	0	0	0	0.12	0	0.01	0	0	0	0	0	0.01	0	0.01	0	0	0	0	0	0	0	0	0	0
13496	Arid3a	0.19	0.07	0.15	0.08	0.05	0.04	0.08	0.11	0.02	0.08	0.04	0.16	0.04	0.04	0.1	0.09	0.15	0.03	0.04	0.05	0.02	0.05	0.26	0.06	0.1	0.21	0.01	0.02	0.03	0	0.01	0	0	0	0	0	0	0	0	0	0	0	0	0	0
56380	Arid3b	0	0	0	0	0	0	0	0	0	0	0	0	0	0	0.01	0	0	0	0	0	0	0	0	0	0	0	0	0	0	0	0	0	0	0	0	0	0	0	0	0	0	0	0	0	0
550619	Arid3c	0.03	0	0	0	0.01	0.02	0.02	0	0	0.04	0	0.03	0.02	0.01	0.01	0.06	0	0.04	0.01	0.02	0	0	0	0.05	0	0.04	0	0	0	0	0	0	0	0	0	0	0	0	0	0	0	0	0	0	0
238247	Arid4a	0	0	0.09	0.01	0.05	0	0.01	0.01	0.01	0.1	0.01	0.03	0	0.01	0.01	0	0	0.02	0	0	0	0	0	0	0	0	0	0	0	0	0	0	0	0	0	0	0	0	0	0	0	0	0	0	0
94246	Arid4b	0	0	0.01	0	0.02	0	0	0	0	0	0	0	0	0.01	0	0	0	0	0	0	0	0	0	0	0	0	0	0	0	0	0	0	0	0	0	0	0	0	0	0	0	0	0	0	0
71371	Arid5b	0	0	0	0	0	0	0	0	0.01	0	0	0	0	0	0	0	0	0	0	0	0	0	0	0	0	0	0	0	0	0	0	0	0	0	0	0	0	0	0	0	0	0	0	0	0
23806	Arih1	0.28	0.28	0.59	0.29	0.4	0.14	0.33	0.27	0.15	0.33	0.21	0.21	0.25	0.21	0.2	0.31	0.17	0.36	0.28	0.18	0.16	0.22	0.36	0.26	0.48	0.41	0.43	0.27	0.34	0.3	0.46	0.43	0.45	0.25	0.32	0.11	0.27	0.24	0.19	0.34	0.12	0.19	0.24	0.24	0.21
23807	Arih2	0.01	0.01	0.02	0.01	0.04	0.03	0.08	0.03	0.01	0.04	0.01	0.02	0.04	0.02	0.03	0.03	0.01	0.04	0.02	0.01	0.02	0.07	0.03	0.02	0.15	0.1	0.08	0.02	0.01	0.06	0.07	0.03	0.03	0.04	0.01	0	0.1	0.01	0.01	0.05	0.01	0.01	0.06	0	3.77
104303	Arl1	0.26	0.64	0.69	0.83	0.55	0.72	0.71	0.55	0.35	0.47	0.46	0.36	0.61	0.72	1.67	0.77	0.58	0.87	1.67	1.23	0.6	0.6	2.51	1.65	2.34	2.63	1.3	1.97	2.25	4.54	2.58	8.1	2.73	4.62	1.88	3.03	1.66	2	0.98	1.58	1.34	1.32	1.26	2.31	3.12
56795	Arl10	0	0	0	0	0	0.01	0	0	0	0	0	0	0	0	0	0	0.01	0	0	0	0	0	0	0	0	0	0.02	0	0	0	0	0	0	0	0	0	0	0	0	0	0	0	0	0	0
212772	Arl14ep	0	0.01	0.01	0.05	0	0	0.01	0	0	0	0	0.01	0	0	0	0	0	0	0	0	0	0	0	0	0	0	0.01	0	0	0	0	0	0.19	0	0	0	0	0	0	0	0	0	0	0	0
218639	Arl15	0.01	0	0.01	0.01	0.01	0.01	0.03	0.01	0.01	0.1	0.01	0	0.01	0.01	0.01	0.01	0.01	0.01	0	0.01	0.02	0.12	0.01	0.03	0	0.05	0.03	0.02	0	0.02	0	0.02	0.05	0	0.03	0	0	0.02	0	0	0	0	0.03	0.14	0.02
56327	Arl2	0.7	0.68	5.54	0.71	0.51	0.89	0.12	0.27	0.68	0.41	0.57	1.07	1.77	0.18	2.8	0.76	0.16	1.34	3.32	0.23	0.14	0.13	0.1	0.35	0.16	0.03	0.15	0.15	0.11	0.19	0.21	0	0.17	0.06	0	0.06	0	0.17	0.05	0	0.14	0	0	0	0.35
107566	Arl2bp	0.03	0	0.03	0.02	0	0.02	0	0	0.01	0	0	0	0	0	0	0	0	0	0	0.02	0	0	0	0	0	0	0	0	0	0	0	0	0	0	0	0	0	0	0	0	0	0	0	0	0
56350	Arl3	0.75	0.42	0.81	0.64	0.19	0.37	0.33	0.32	1.22	0.14	0.01	0.27	0.12	0.62	0.6	0.28	1.28	0.74	0.27	0.65	0.38	0.57	1.09	0.4	0.48	0.32	0.04	0.84	0.38	0.4	0.06	1.15	0.84	0.53	0.37	0.86	0	0.18	0.1	0.08	0.43	0.19	0.18	0.82	0.2
11861	Arl4a	0	0	0	0	0	0	0	0	0	0	0	0	0	0	0.01	0	0	0	0	0	0	0	0	0	0	0	0	0	0	0	0	0	0	0	0	0	0	0	0	0	0	0	0	0	0
75423	Arl5a	0	0	0.04	0.02	0	0.02	0.02	0.01	0	0	0.01	0.01	0	0.02	0	0	0	0.03	0	0.01	0.01	0	0	0.02	0	0	0.03	0.06	0	0	0	0	0.07	0	0	0	0	0	0	0	0	0	0	0	0
75869	Arl5b	0	0	0.03	0.01	0	0	0.02	0	0	0	0.01	0	0	0.02	0	0	0	0	0	0	0	0	0	0.01	0	0	0.03	0.06	0	0	0	0	0.02	0	0	0	0	0	0	0	0	0	0	0	0
217151	Arl5c	0	0	0.03	0	0	0	0	0	0	0	0	0	0	0.03	0	0	0	0	0	0	0	0	0	0	0	0	0.03	0.07	0	0	0	0	0	0	0	0	0	0	0	0	0	0	0	0	0
56297	Arl6	0	0	0	0	0	0	0	0	0	0	0	0	0	0	0	0	0	0	0	0	0	0	0	0	0	0	0	0	0.01	0	0	0	0	0	0	0	0	0	0	0	0	0	0	0	0
54208	Arl6ip1	0.23	0.3	0.11	0	1.06	0	0.36	0.02	0.11	0.11	0.18	0	0.3	0.18	0.09	0.3	0.31	0.15	0	0	0	0.18	0	0.06	0.67	0	0.51	0.3	0.39	0.27	0.06	0.22	0.79	0.63	0.5	0.42	0.28	0.41	0.39	0.45	0.16	0.65	0.03	1.43	1.08
65105	Arl6ip4	0.02	0.1	0	0	0.03	0	0.2	0	0	0.02	0	0.02	0.02	0.01	0.02	0	0	0	0	0	0	0	0	0.04	0.06	0.07	0.04	0.05	0	0.07	0.05	0	0	0	0	0	0	0	0	0	0	0	0	0.02	0.03
65106	Arl6ip5	0.44	0.5	0.79	0.92	0.47	0.21	0.57	0.73	0.39	0.3	0.5	0.33	0.5	0.51	0.94	0.41	0.61	0.78	0.86	0.9	0.09	0.29	0.95	0.72	0.85	0.48	0.98	1.15	0.15	2.44	0.83	1.1	0.37	1.1	0.26	0.69	0.77	0.81	1.17	0.63	11.21	0.38	0.82	0.59	0.55
65103	Arl6ip6	0	0	0.03	0	0	0	0.02	0	0	0	0	0	0	0	0	0	0	0	0	0	0	0	0	0	0	0	0.07	0	0	0	0	0	0	0	0	0	0.01	0	0	0	0	0	0	0	0
68724	Arl8a	0.07	0	0.34	0.33	0.41	0.12	0.3	0.74	0.81	0.16	0.23	0.4	0.24	0.11	0.52	0.12	0.13	1.04	0.33	0.39	0.48	0.67	0.73	0.63	3.22	1.85	1.49	0.73	0.71	1.63	0.99	1.82	2.15	1.02	0.75	3.51	0.6	1.12	3.84	1.04	0.78	0.57	3.48	0.65	2.54
67166	Arl8b	0.35	0.42	0.89	0.79	0.71	0.5	0.7	1.15	1.15	0.73	0.56	0.55	0.63	0.39	0.71	0.74	0.55	1.87	1.23	1.46	0.67	1.8	1.51	1.31	3.97	2.6	1.89	1.83	1.22	2.3	2.17	2.78	2.67	1.85	1.41	3.69	1.31	1.63	4.46	1.66	1.94	0.92	3.67	1.01	3.04
74252	Armc1	0.29	0.72	0.73	0.41	0.36	0.73	0.41	0.4	0.35	0.71	0.09	0.41	0.31	0.03	0.62	0.06	0.28	0.47	0.3	0.19	1.18	0.18	0.21	0.54	1.33	0.32	0.39	1.41	1.81	1.33	1.36	0.6	1.07	0.85	1.09	1.82	0.93	1.23	1.91	2.05	1.22	1.42	1.75	1.37	1.38
67211	Armc10	0.06	0.06	0.15	0.04	0.15	0.11	0.02	0.03	0.05	0.02	0.01	0.28	0.06	0	0.08	0	0.01	1.7	0.09	0.01	0.04	0.06	0.08	0.05	0.04	0.68	0.37	0.05	0.01	0.04	0.07	0.22	0.05	0.12	0.21	0.5	0.03	0.06	0.03	0	0	0.06	0.03	0	0.98
70882	Armc3	0	0	0	0	0	0	0	0	0	0	0	0	0	0	0	0	0	0	0	0	0	0	0	0	0	0	0	0	0	0	0	0	0	0	0	0	0	0	0	0	0	0.01	0	0	0
74934	Armc4	0	0	0	0	0	0	0	0	0	0.01	0	0	0	0	0	0	0	0	0	0	0	0	0	0	0	0.01	0	0	0	0	0	0.01	0	0	0	0	0	0	0	0	0	0	0	0	0
233912	Armc5	0	0	0	0	0	0.02	0	0	0	0	0	0	0	0	0	0	0	0	0	0	0	0	0	0	0	0	0	0	0	0	0	0	0	0	0	0	0	0	0	0	0	0	0	0	0
76813	Armc6	0.28	0.21	0.35	0.26	0.54	0.52	0.24	0.59	0.27	0.23	0.28	0.4	0.19	0.27	0.19	0.11	0.06	0.27	0.08	0.09	0.16	0.02	0.05	0.04	0.24	0.05	0.06	0.52	0.07	0	0	0	0.03	0.05	0.05	0.03	0.03	0.16	0.04	0.01	0	0.03	0.01	0.16	0.02
74125	Armc8	0.16	0.1	0.27	0.09	0.24	0.06	0.08	0.05	0.09	0.05	0.06	0.13	0.09	0.2	0.13	0.13	0.17	0.19	0.1	0.18	0.11	0.06	0.08	0.08	0.03	0.06	0.04	0.04	0.07	0.12	0.04	0.09	0.06	0.01	0.07	0.04	0.01	0.05	0.04	0.36	0	0.02	0.01	0.02	0.01
78795	Armc9	0.01	0	0	0	0	0.01	0	0	0	0	0	0	0	0	0	0	0	0.04	0	0.01	0	0	0.01	0	0	0	0	0	0	0	0.01	0.01	0	0	0	0.01	0	0	0	0	0.01	0	0	0	0
67416	Armcx2	0	0	0	0	0.01	0	0	0	0	0	0	0.29	0	0	0	0	0	0	0	0	0	0.33	0	0.64	0.01	0	0.6	0	0	0	0	0	0	0	0	0	0	0	0	0	0	0	0	0	0
71703	Armcx3	0	0.01	0	0.01	0	0	0.01	0.01	0	0	0.01	0.04	0	0.01	0.03	0	0.01	0.09	0.01	0	0.06	0	0	0.01	0.01	0.01	0.01	0	0.02	0.01	0	0.01	0	0	0	0	0.01	0	0	0	0	0	0	0	0
100503043	Armcx4	0	0	0	0	0	0	0	0	0	0	0	0	0	0	0	0	0	0	0	0	0	0	0	0	0	0	0	0	0	0	0	0.17	0	0	0	0	0	0	0	0	0	0	0	0	0
71617	Armh3	0.01	0	0.02	0	0.24	0.01	0	0.05	0.01	0.02	0	0.23	0.02	0.09	0.02	0.36	0.02	0.04	0	0	0	0	0.12	0.28	0.08	0.02	0.3	0	0.03	0.06	0.03	0.69	0.82	0.03	0.03	0.47	0	0.02	0.01	0	0	0.43	0.32	0	0.01
73419	Armt1	0.05	0.02	0.11	0.07	0.41	0.98	0.07	0.13	0.05	0.03	0.03	0.04	0.08	0.02	0	0.03	0.05	0.01	0.03	0.04	0.05	0.02	0.18	0.01	0.05	0.06	0.08	0.04	0.03	0.05	0.25	0.01	0.14	0.04	0.02	0.03	0.04	0.12	0.04	0.02	0.06	0.06	0.02	0.07	0.05
11863	Arnt	0	0.01	0.01	0	0.01	0.05	0.01	0	0.04	0	0.01	0.01	0	0	0.02	0	0	0	0	0	0	0	0	0	0	0	0	0	0.01	0	0	0	0	0	0	0	0	0	0	0	0	0	0	0	0
11865	Arntl	0	0	0	0	0	0	0	0	0	0	0	0.02	0	0	0	0	0	0	0	0	0	0	0	0	0	0	0	0	0	0	0	0	0	0.01	0	0	0	0.01	0	0	0	0	0	0.01	0
56443	Arpc1a	0.43	0.36	1.23	0.34	0.52	0.54	0.34	0.56	0.39	0.26	1.48	0.68	0.21	0.16	0.33	0.11	0.48	0.59	0.35	0.11	0.39	0.18	0.33	0.48	0.75	0.84	0.51	0.8	0.95	1.44	1.27	0.78	0.52	2.35	1.72	1.62	1.2	2.09	2.18	0.7	0.64	0.73	1.04	1.08	2.2
11867	Arpc1b	0.52	0.59	0.93	0.53	0.47	0.48	0.49	1.07	0.88	0.88	0.54	1.11	0.64	0.52	1.22	0.67	0.93	1.38	1.42	1.61	0.66	1.2	1.09	1.78	2.56	3.48	1.91	2.41	1.47	2.09	3.01	2.24	2.38	1.96	2.34	1.28	1.37	1.68	1.29	1.86	1.2	0.94	1.22	1.06	0.89
76709	Arpc2	4.5	3.76	10.85	4.27	5.19	4.29	3.47	5.4	5.45	3.88	3.34	4.21	4.58	2.82	6.18	5.16	4.11	7.81	7.45	8.49	4.13	6.1	10.96	9.65	16.67	14.15	15.65	12.12	7.75	17.18	10.52	11.51	17.75	12.45	13.19	13.23	8.81	13.32	11.9	15.04	5.4	6.06	6.7	10.87	12.02
56378	Arpc3	1.11	1.34	3.67	1	3.12	2.52	2.61	2.39	2.28	1.99	0.99	1.82	2.03	2.2	4.72	0.56	1.64	5.56	2.05	3.76	4.32	2.44	4.62	3.81	2.57	4.29	6.71	6.08	4.18	7.65	8.29	4.97	9.7	5.37	5.23	8.45	1.82	10.99	8.47	1.43	3.99	4.17	4.4	8.45	7.23
68089	Arpc4	2.21	2.47	4.71	2.92	1.67	2.88	2.17	2.55	2.58	2.36	1.78	2.41	2.3	2.18	2.89	3.09	2.59	5.21	5.69	4.93	1.95	3.25	7.47	3.68	6.35	6.63	7.75	7.12	5.53	5.05	7.52	9.79	6.09	5.78	5.59	10.9	4.95	4.69	5.56	8.61	4.62	6.22	4.34	2.74	3.81
67771	Arpc5	2.59	1.31	4.55	1.62	0.63	4.35	1.33	1.97	4.52	2.58	2.41	2.09	1.51	4.26	2.1	1.63	1.76	3.31	3.06	4.13	1.72	4.32	2.38	2.99	4.52	2.95	10.82	4.39	6.31	5.05	4.53	5.31	8.59	3.19	6.97	2.73	5.25	3.8	3.02	4.7	2.13	2.1	3.4	4.06	2.99
74192	Arpc5l	0.84	0.48	1.01	0.5	0.41	0.26	0.41	0.73	0.68	0	0.09	0.42	0.46	0.11	0.65	0.39	0.01	0.8	0.2	1.18	0.65	0.91	0.93	0.89	1.45	1.16	1.08	2.37	0.83	1.95	1.1	0.35	2.92	1.17	2.2	2.06	0.73	1.53	1.66	1.04	0.88	0.58	1.3	3.07	2.71
70420	Arpin	0.2	0.09	0	0.07	0.14	0.23	0	0.06	0	0.04	0.1	0.41	0.04	0.04	0.06	0.1	0	0.22	0.12	0.09	0	0.19	0.03	0.14	0.83	0	0.06	0.16	0.73	0	0	0	0.24	0.29	0.07	0.2	0.06	0.44	0.29	0	0	0.29	0.06	0.13	0.08
59046	Arpp19	0.89	1.06	2.02	3.15	2.75	2.22	2.67	0.44	0.91	0.93	0.66	1.47	0.34	0.81	0.7	0.17	0.59	0.59	0.16	0.31	0.92	1.88	0.67	1.41	5.27	0.35	0.11	0.14	0.02	2.83	0.34	8.61	0.55	0.93	0.6	7.73	0.13	0.2	0.34	0.08	0.47	0.46	0.39	0.12	0.22
109689	Arrb1	0.22	0.12	0.6	0.09	0.14	0.19	0.14	0.25	0.31	0.1	0.04	0.1	0.11	0.15	0.08	0.14	0.12	0.22	0.14	0.18	0.12	0.2	0.31	0.12	0.31	0.21	0.18	0.35	0.25	0.27	0.07	0.31	0.35	0.26	0.57	0.13	0.23	0.21	0.12	0.04	0.12	0.1	0.11	0.11	0.1
216869	Arrb2	0.04	0.04	0.28	0.11	0.07	0.17	0.18	0.21	0.19	0.34	0.17	0.18	0.06	0.08	0.14	0.14	0.19	0.12	0.21	0.15	0.03	0.19	0.48	0.08	0.38	0.24	0.26	0.29	0.55	0.35	0.84	0.45	0.32	0.22	0.58	0.33	0.05	0.07	0.26	0	0.11	0.29	0.22	0.03	0.2
215705	Arrdc1	0	0	0.01	0.01	0	0	0	0	0	0	0	0	0.06	0	0	0	0	0	0	0	0	0	0	0	0	0	0	0	0	0	0	0	0	0	0	0	0	0	0	0	0	0	0	0	0
70807	Arrdc2	0	0	0	0	0	0	0.4	0	0.24	0	0	0.22	0.31	0	0	0	0	0	0.74	0	0.06	0.85	0	0	0	0.11	0	0.83	0	0	0	0	0.69	0.9	0.83	0.55	0	0.17	0.07	0.33	0	0	0	0.02	0
76920	Arrdc5	0	0	0	0	0	0.03	0	0	0.1	0	0	0	0	0	0	0	0	0	0	0	0	0	0	0	0	0	0	0	0	0	0	0	0	0.18	0	0	0	0	0	0	0	0	0.1	0.1	0
11883	Arsa	0	0	0.01	0	0	0.01	0	0	0	0.01	0	0.03	0.03	0	0.01	0.01	0.02	0.02	0	0.03	0	0.02	0.14	0.02	0.11	0.15	0.08	0.14	0.13	0.04	0.23	0.17	0.15	0.46	0.13	0.04	0.07	0	0	0.05	0	0.01	0.03	0.42	0.01
11881	Arsb	0.02	0.03	0	0.04	0.02	0	0.03	0.06	0.07	0.03	0.05	0.09	0.02	0	0.33	0.06	0.14	0.23	0.22	0.21	0.25	0.3	0.68	0.76	0.46	0.88	0.51	0.7	0.47	0.73	0.84	1.2	1.78	0.9	0.72	0.98	0.16	0.32	0.43	0.18	0.24	0.19	0.31	0.4	0.31
74008	Arsg	0	0	0	0	0	0	0	0	0	0	0	0	0	0	0	0	0	0	0	0	0	0	0	0.08	0.16	0	0.12	0.04	0.01	0.08	0.02	0.46	0.11	0.3	3.57	0.03	0	0	0	0.04	0	0	0	0	0
109978	Art4	0	0	0	0	0.02	0.02	0	0	0.02	0	0.04	0	0.03	0.01	0.01	0.01	0	0	0	0	0	0	0	0.01	0	0	0.02	0	0	0.02	0	0	0.04	0	0.03	0.08	0	0.04	0.02	0	0	0	0	0.02	0.01
11877	Arvcf	0	0	0	0.01	0.01	0.01	0.01	0.04	0.01	0.01	0.01	0.01	0.04	0.01	0.01	0.03	0.05	0.04	0.02	0.03	0.04	0.02	0.6	0.05	0.13	0.06	0.08	0.15	0.05	0.11	0.86	1.1	0.54	0.1	0.57	0.23	0.07	0.15	0.12	0.04	0.49	0	0.03	0.04	0.03
11878	Arx	0.05	0	0	0.01	0	0	0	0	0	0	0	0	0	0	0	0.11	0	0.02	0.08	0	0	0	0	0	0	0	0	0	0	0	0.19	0	0	0.15	0	0	0	0	0	0	0	0	0	0	0
76219	Arxes1	0	0	0.05	0.02	0	0.02	0.03	0.03	0.01	0.01	0.02	0.04	0.03	0.05	0	0	0.08	0.09	0.03	0.22	0	0.01	0.08	0.14	0.05	0	0.58	0.09	0	0.02	0.07	0	0.05	0	0	0	0	0	0	0	0	0	0	0	0
76976	Arxes2	0	0	0.05	0.02	0	0.02	0.03	0.03	0.01	0.01	0.02	0.04	0.03	0.05	0	0	0.08	0.09	0.03	0.22	0	0.01	0.08	0.14	0.05	0	0.58	0.09	0	0.02	0.07	0	0.05	0	0	0	0	0	0	0	0	0	0	0	0
57344	As3mt	0.29	0.2	0.6	0.26	0.24	0.17	0.16	0.46	0.29	0.23	0.39	0.37	0.36	2.93	0.52	0.43	0.55	1	1.18	1.25	0.68	1.58	1.73	1.21	1.75	1.92	1.25	4.67	1	1.55	3.12	1.52	1.22	1.14	1.36	0.91	1.55	2.29	1.92	3.71	3.55	1.42	1.1	1.68	1.49
11886	Asah1	0.15	0.26	0.23	0.13	0.18	0.23	0.21	0.52	0.32	0.17	0.17	0.57	0.19	0.22	0.83	0.31	0.3	1.18	0.32	0.62	1.01	0.46	1.06	0.66	1.57	1.95	1.76	0.96	1.63	1.51	2.31	2.93	2.13	1.6	2.65	1.47	1.04	0.82	1.24	0.79	0.76	0.89	0.58	0.85	0.86
54447	Asah2	0	0	0	0	0	0	0	0	0	0	0	0.05	0	0	0	0	0	0	0	0	0	0	0	0	0	0.25	0	0.24	0	0.06	0	0.35	0.23	0.47	0.16	0	0	0	0.14	0.01	0	0.15	0.01	0.01	0.04
13196	Asap1	0.08	0.08	0.05	0.22	0.02	0.11	0.27	0.13	0.01	0.03	0.03	0.14	0.05	0.17	0.01	0.09	0.02	0.15	0.04	0.02	0	0.01	0.01	0.01	0.01	0.01	0.02	0.01	0.01	0	0	0.01	0.03	0.01	0	0.01	0	0	0.01	0	0	0	0.01	0	0
211914	Asap2	0.9	2.47	0.79	0.01	0.33	1.86	1.05	0.43	0	0	0	0	0	0.01	0.2	0	0.85	0.44	1.28	0.99	0	0.01	1.38	0	0	0.07	0.48	0.57	1.74	0.01	0.12	0.05	0.36	1.47	0.03	1.48	0	0.5	0.01	0	0.22	0.01	0	0.68	0.02
230837	Asap3	0	0	0	0	0	0	0	0	0	0	0	0	0	0	0	0	0	0	0	0	0	0	0	0.04	0	0	0.04	0	0	0.02	0.01	0.01	0.02	0	0	0	0	0	0	0	0	0	0	0	0
65247	Asb1	0	0	0	0.13	0	0.06	0	0	0	0.07	0	0	0	0	0	0	0	0	0	0	0	0	0	0	0	0	0	0	0	0	0	0	0	0	0	0	0	0	0	0	0	0	0	0	0
117590	Asb10	0	0	0.01	0	0	0	0	0	0	0	0	0.03	0	0	0	0	0	0.02	0	0	0	0	0	0	0	0	0	0	0	0	0	0	0	0	0	0	0	0	0	0	0	0	0	0	0
68854	Asb11	0	0	0	0	0.01	0	0	0.01	0	0	0	0	0	0	0	0	0	0	0	0	0	0	0	0	0	0	0	0	0	0	0	0	0	0	0	0	0	0	0	0	0	0	0	0	0
142688	Asb13	0	0	0	0	0	0	0	0	0	0	0	0	0	0	0	0	0	0	0	0	0	0	0.01	0	0	0	0.01	0	0.02	0	0	0	0	0.01	0	0	0	0	0.03	0	0	0	0	0.02	0
217217	Asb16	0	0	0	0	0	0	0	0	0	0	0	0	0	0	0	0	0	0	0	0	0	0	0	0	0	0	0	0.02	0	0	0	0	0	0	0	0	0	0	0	0	0	0	0	0	0
65256	Asb2	0	0	0	0	0	0	0	0	0	0	0	0	0	0	0	0	0	0	0	0	0	0	0	0	0	0	0	0	0	0	0	0	0	0	0	0	0	0	0	0	0	0	0	0	0.01
65257	Asb3	0	0	0.01	0.01	0	0	0	0	0.01	0.01	0	0.02	0	0	0	0	0	0.05	0.01	0.53	0.05	0.03	0	0.05	0	0	0.04	0	0	0	0.1	0	0.03	0	0	0	0	0	0	0.02	0	0	0	0	0.01
65255	Asb4	0.01	0.01	0.04	0	0.01	0.01	0	0	0	0	0	0	0	0	0	0	0	0	0	0	0	0	0	0	0	0	0	0	0	0	0	0	0	0	0	0	0	0	0	0	0	0	0	0	0
72323	Asb6	0.17	0.11	0.78	0.2	2.82	0.08	0.04	0.04	0.02	0.15	0.15	0.04	1.03	0.14	0.03	0.9	0.02	0.01	0	0.01	0.01	0	0	0	0.01	0	0.01	0.04	0	0	0	0	0	0	0	0	0	0	0	0	0	0	0	0	0
78541	Asb8	0	0	0	0	0	0	0	0	0	0	0	0	0	0	0	0	0	0	0	0	0	0	0	0	0	0	0	0	0	0	0	0	0	0	0	0	0	0	0	0	0	0	0	1.69	0
69090	Ascc1	0.04	0.01	0.06	0.04	0.1	0.1	0.06	0.02	0.02	0	0.02	0.04	0.02	0.03	0.01	0.04	0.01	0.06	0.01	0.05	0.04	0.01	0.05	0	0.01	0.05	0.05	0.06	0.01	0	0	0	0.05	0.13	0.01	0.01	0	0	0	0.01	0	0	0	0	0
75452	Ascc2	0.05	0.05	0.12	0.06	0.08	0.05	0.1	0.06	0.09	0.03	0.09	0.08	0.02	0.03	0.05	0.21	0.04	0.11	0.36	0.22	0.07	0.1	0.08	0.03	0.11	0.1	0.18	0.12	0.05	0.04	0.07	0.07	0.05	0.08	0.03	0.1	0.01	0.13	0.1	0.02	0.05	0.02	0.13	0.08	0.13
77987	Ascc3	0.07	0.2	0.11	0.05	0.05	0.1	0.12	0.04	0.03	0.09	0.05	0.02	0.03	0.04	0.04	0.05	0.02	0.06	0.03	0.04	0.05	0.02	0.06	0.03	0.04	0.1	0.07	0.04	0.05	0.02	0.08	0.29	0.05	0.05	0	0.02	0.03	0.07	0.03	0.03	0.04	0	0.02	0.01	0.01
66403	Asf1a	1.32	1.01	1.63	0.87	0.86	0.5	0.91	0.3	0.66	0.54	0.81	0.49	0.46	0.84	0.11	0.5	0.04	0.54	0.23	0.22	0.18	0.18	0	0.17	0	0.07	0.01	0.07	0.23	0.29	0	0	0	0	0.1	0.05	0	0.03	0.01	0	0	0	0	0	0
66929	Asf1b	0.84	0.44	0.86	0.88	0.59	0.48	1.01	0.29	0.35	0.55	0.71	0.31	1.64	0.24	0.09	0.25	0.26	0.28	0.02	0.16	0.17	0.42	0	0.11	0	0.63	0	0	0.23	0.19	0.05	0	0	0	0.09	0	0	0	0	0	0	0	0	0	0
11889	Asgr1	0	0	0	0	0	0	0	0	0	0	0	0	0	0	0.03	0	0	0.7	1.78	2.26	0.58	2.5	2.94	2.73	13.14	9.79	9.06	14.17	8.89	15.8	17.84	12.02	12.05	12.53	11.1	15.98	7.44	14.95	14.57	11.07	11.3	5.66	9.6	13.57	13.8
11890	Asgr2	0	0	0	0	0	0	0	0.01	0	0	0	0	0	0	0	0	0	0.16	0.24	0.03	0.1	0.08	0.68	0.37	0.82	2.55	1.91	2.37	2	4.57	3.06	5.21	3.57	4.85	4.86	3.61	5.62	5.92	4.15	1.18	3.19	3.38	3.98	3.44	3.59
23808	Ash2l	0.27	0.22	0.28	0.15	0.2	0.15	0.08	0.05	0.15	0.17	0.1	0.08	0.14	0.14	0.06	0.05	0.08	0.06	0.05	0.04	0.13	0.03	0.25	0.01	0.1	0.06	0.05	0.02	0.07	0.01	0.02	0.22	0.07	0.03	0.03	0	0	0.01	0.01	0.01	0	0	0.01	0	0
109900	Asl	0.93	1.07	1.48	1.51	1.73	1.08	1.81	3.65	2.73	3.82	2.63	3.64	2.57	2.72	4.86	4.56	4.1	8.86	15.53	16.14	8.18	23.31	95.93	28.28	80.56	65.29	48.86	58.51	44.73	36.8	131.69	72.23	41.41	86.61	100.48	68.01	140.11	184.76	153.98	170.64	173.15	161.06	91.25	124.02	124.38
56495	Asna1	1.39	0.9	2.03	1.57	0.97	1.24	1.31	0.88	0.98	0.88	0.69	0.63	1.35	0.69	0.67	0.88	1.12	0.81	1.1	1.13	0.54	1.1	1.04	1.06	1.85	2.84	1	1.38	0.73	0.65	1.45	2.08	1.46	1.07	0.76	0.53	1.13	0.84	0.61	0.63	0.69	0.66	0.77	1	0.84
27053	Asns	11.69	10.47	15.65	9.72	10.27	13.13	8.23	9.89	10.85	9.68	8.64	10.31	11.9	9.96	11.51	8.03	7.63	12.34	7.01	7.14	6.56	5.39	6.35	4.48	8.22	4.6	2.87	2.67	2.75	3.23	2.83	2.8	1.63	0.72	0.49	0.82	0	0.05	0.58	0.45	0	0	0	0	0
11484	Aspa	0	0	0	0	0	0	0	0	0.01	0	0	0	0.01	0	0	0	0.01	0.01	0.31	0	0	0	0.06	0.03	0.06	0.59	0.2	0.07	0.17	0.33	0.12	0.3	0.4	1.08	0.61	0.19	0.17	0.37	0.33	0.51	0.61	0.17	0.05	0.12	0.07
68352	Aspdh	0.01	0.01	0	0.02	0.01	0.02	0.03	0.25	0.08	0.28	2.49	0.34	0.2	2.53	0.87	0.57	0.48	1.34	5.11	1.21	1.1	3.23	1.55	5.13	3.45	3.29	4.28	9.7	9.84	17.41	19.94	10.35	16.3	32.06	22.41	30.13	24.04	47.67	38.09	34.27	44.22	22.15	20.78	40.02	37.68
104816	Aspg	0	0	0	0	0	0	0	0	0	0	0	0	0	0	0	0	0	0	0	0	0	0	0.07	0.08	0.17	0.13	0.1	0.01	0.04	0.16	0.19	0.12	0.09	0.2	0.13	0.42	1.63	2.62	1.92	2.99	1.64	1.63	2	2.46	2.7
65973	Asph	0.14	0.29	0.58	0.61	0.52	0.62	0.35	0.65	0.69	0.58	0.45	0.41	0.78	0.71	1.14	0.69	0.72	1.55	1.26	1.49	0.81	0.99	2.02	1.78	2.7	2.22	2.23	2.45	2.82	2.23	2.19	2.86	2.76	1.59	1.69	3.97	1.02	2.11	2.02	1.19	1.38	0.8	1.39	1.13	1.11
233879	Asphd1	0	0	0	0	0	0	0	0	0	0	0	0	0	0	0	0	0	0	0	0	0	0	0	0	0	0	0	0	0	0	0	0	0	0	0	0	0	0	0	0	0	0.05	0	0	0
12316	Aspm	0	0	0	0	0	0	0	0	0	0	0	0	0.01	0	0	0	0	0	0	0	0	0	0	0	0	0	0	0	0	0	0	0	0	0	0	0	0	0	0	0	0	0	0	0	0
66695	Aspn	0	0	0	0	0	0	0	0	0	0	0	0	0	0	0	0	0	0	0	0	0	0	0	0	0	0	0.22	0.32	0	0	0	0	0.35	0	0	0	0	0	0	0	0	0	0	0	0
67855	Asprv1	0	0	0	0	0	0	0	0	0	0	0	0.13	0	0	0.03	0	0.2	0.07	0.01	0.02	0.14	0	0	0	0	0.35	0.05	0	0	0	0.01	0	0	0	0	0	0	0	0	0	0	0	0	0	0
68938	Aspscr1	0.18	0.02	0.12	0.07	0.08	0.06	0.1	0.06	0.17	0.12	0.19	0.11	0.08	0.06	0.06	0.08	0.23	0.19	0.02	0.05	0.06	0.08	0.18	0.18	0.39	0.35	0.29	0.08	0.21	0.15	0.57	0.27	0.25	0.57	0.3	0.17	0.33	0.45	0.25	0.18	0.37	0.17	0.23	0.32	0.29
66514	Asrgl1	0.08	0.03	0.46	0.21	0.09	0.13	0.16	0.11	0.2	0	0.05	0.15	0.04	0.23	0.06	0	0.08	0.09	0.06	0.13	0.13	0.07	0.05	0.26	0.26	0.27	0.2	1.04	0.13	0.12	0.19	0	0.21	0.05	0.21	0.13	0.4	1.89	0.39	0.15	0.06	0.06	0.27	0.3	0.3
11898	Ass1	3.25	3.37	4.6	3.87	6.04	2.74	8.78	30.78	15.66	41.02	19.27	40.41	26.32	15.4	96.45	73.68	66.73	254.69	294.02	253.72	163.34	345.31	772.72	471.51	1003.01	720.31	514.92	461.09	350.59	371.84	1412.94	428.08	240.12	1370.81	1042.2	767.75	2499.65	2627.82	2472.35	2899.25	3592.07	3432.4	1863.86	2312.95	2419.11
67979	Atad1	0.61	0.53	0.33	0.36	0.18	0.46	0.28	0.32	0.32	0.4	0.12	0.38	0.2	0.14	0.32	0.22	0.44	0.79	0.36	0.22	0.32	0.13	0.57	0.34	0.61	0.96	0.77	0.84	0.98	0.75	0.68	1.53	0.61	1.37	1.08	0.58	0.73	1.99	1.2	1.23	0.33	0.98	0.78	1.04	0.62
70472	Atad2	0.12	0.06	0.08	0.15	0.12	0.3	0.08	0.04	0.09	0.05	0.18	0.07	0.34	0.08	0.02	0.09	0.12	0.04	0	0	0.01	0	0.02	0.01	0	0.04	0.01	0	0.03	0	0	0.04	0.05	0.04	0	0	0.03	0	0	0	0	0	0	0	0
320817	Atad2b	0.01	0.09	0.07	0.07	0.02	0.07	0.07	0.07	0.04	0.06	0.09	0.04	0.05	0.63	0.04	0.03	0.03	0.07	0.03	0.03	0.03	0	0.07	0.06	0.02	0.09	0.13	0.03	0.03	0.04	0.01	0.04	0.02	0.14	0.01	0.03	0.04	0	0	0	0	0.03	0	0	0
108888	Atad3a	0.78	0.94	1.55	0.92	0.91	1.03	0.82	1.02	1.19	0.56	0.96	0.91	1.04	1.04	1.05	0.7	0.79	1.46	1.07	1.3	1.17	1.07	1.84	1.71	3.01	2.46	1.98	2.05	1.42	2.51	2.13	1.94	1.74	2.38	2.14	2.65	1.57	3.2	3.23	2.33	3.51	2.14	2.57	2.94	2.79
237877	Atad5	0.05	0.04	0.01	0.05	0	0.01	0.05	0	0	0	0.01	0	0.01	0.02	0	0	0.01	0	0	0	0	0	0	0	0	0	0	0	0	0	0	0	0	0	0	0	0	0	0	0	0	0	0	0	0
73242	Atat1	0	0	0	0	0.08	0	0	0	0.06	0	0	0.08	0	0	0	0	0	0	0	0	0.09	0	0	0.02	0	0	0	0	0	0.02	0	0	0	0	0	0	0	0	0	0	0	0	0	0	0
11907	Ate1	0.03	0.02	0.03	0.01	0.13	0.22	0.01	0.17	0.12	0.01	0	0.05	0.01	0.01	0.04	0.01	0.01	0.09	0.04	0.01	0.08	0.01	0	0.02	0	0	0.02	0.02	0.15	0.04	0	0	0.02	0.15	0.04	0	0	0.04	0	0.07	0.18	0	0.04	0.07	0.03
11908	Atf1	0.1	0.12	0.26	0.12	0.16	0.23	0.09	0.14	0.15	0.07	0.09	0.11	0.08	0.07	0.09	0.09	0	0.18	0.07	0.03	0.15	0.04	0.07	0.05	0.09	0	0.08	0.08	0.05	0.05	0.01	0	0.09	0	0.1	0.05	0	0	0.07	0.04	0	0.05	0.03	0.03	0
11909	Atf2	0	0	0	0	0	0.01	0	0.01	0.01	0	0	0.01	0	0	0	0	0	0.01	0	0	0.01	0	0	0.02	0	0	0	0	0	0.01	0	0	0.01	0	0	0.01	0	0.01	0	0	0	0	0	0.01	0
223922	Atf7	0	0	0.02	0.04	0.01	0.01	0	0.02	0.01	0	0	0.01	0	0.01	0	0	0	0.01	0	0.01	0.01	0	0	0.01	0	0	0	0	0	0.01	0	0	0.03	0.26	0	0.01	0	0.01	0	0	0	0	0	0.01	0
54343	Atf7ip	0.2	0.03	0.28	0.02	0.02	0.04	0.15	0.17	0.01	0	0.01	0.02	0.12	0.01	0.01	0.03	0.01	0.01	0	0.01	0	0	0	0.09	0	0	0	0	0.08	0	0	0.01	0.01	0	0	0	0.01	0	0	0	0	0	0	0	0
66795	Atg10	0	0	0	0	0	0	0	0	0	0	0	0	0	0	0	0	0	0	0	0	0	0	0	0	0	0	0	0	0	0.01	0	0	0	0	0	0	0	0	0	0	0	0	0	0	0
68118	Atg101	0.08	0.01	0	0.01	0.04	0.01	0.01	0.01	0.09	0.01	0	0.01	0	0	0.01	0.01	0.01	0.01	0.19	0	0	0.01	0	0.02	0.02	0.01	0.04	0	0.02	0.02	0	0.06	0.07	0.14	0	0.04	0.02	0	0	0.02	0.02	0	0.18	0.03	0.04
67526	Atg12	0	0	0	0	0.05	0.03	0	0.09	0.04	0	0.03	0.04	0	0.03	0.02	0	0.05	0.08	0.03	0	0.08	0	0	0	0	0	0	0.05	0	0	0	0	0	0	0	0	0	0	0	0	0.14	0	0	0	0
51897	Atg13	0	0	0	0	0.01	0	0	0.02	0.02	0	0	0	0	0	0	0	0	0	0	0	0	0	0	0	0	0	0.01	0	0	0	0	0	0	0	0	0	0	0	0	0	0	0	0.03	0	0
77040	Atg16l1	0.03	0	0.01	0.01	0.01	0.01	0.01	0.04	0.02	0.01	0.03	0.05	0.02	0	0.03	0.06	0.01	0.3	0.03	0.06	0.03	0.09	0.03	0.06	0.09	0.31	0.14	0.07	0.14	0.14	0.55	0.13	0.18	0.03	0.1	0.13	0.03	0.03	0.04	0	0.02	0.05	0	0.08	0.05
329015	Atg2a	0	0.01	0.01	0	0	0.01	0	0.01	0	0	0	0.11	0.01	0.03	0	0	0	0.01	0.01	0.01	0	0.01	0	0	0	0	0	0	0	0	0	0	0	0	0	0	0	0	0	0.11	0	0	0.02	0.08	0
76559	Atg2b	0.02	0.01	0.02	0.01	0.01	0.07	0.06	0.05	0.01	0.01	0	0.01	0.01	0	0	0.01	0.02	0	0	0	0	0	0	0	0	0	0	0	0	0	0	0	0	0	0	0	0	0	0	0	0	0.01	0	0.01	0
67841	Atg3	0.49	0.58	0.18	0.05	0.34	0.55	0.91	0.38	0.14	0.32	0.57	0.19	0.24	0.1	0.11	0.47	0.15	0.25	0.37	0.78	0.48	0.46	0.23	0.27	0.25	1.05	0.14	0.35	0.18	2.06	1.01	1.24	1.07	0.88	1.13	1.5	1.46	3.94	2.01	1.37	1.66	2.05	0.76	1.74	1.81
666468	Atg4a	0	0	0	0.01	0.01	0.01	0.01	0.01	0	0	0	0.01	0	0.01	0.02	0	0	0.01	0	0.03	0.01	0.01	0	0	0	0	0	0	0	0	0	0	0	0	0	0	0	0	0	0	0	0	0	0.01	0.51
66615	Atg4b	0.13	0.24	0.15	0.21	0.11	0.28	0.21	0.32	0.22	0.23	0.23	0.28	0.17	0.19	0.27	0.32	0.3	0.27	0.11	0.22	0.13	0.29	0.42	0.49	0.24	0.31	0.1	0.63	0.36	0.39	0.16	0.22	0.31	0.16	0.24	0.32	0.19	0.36	1.6	0.92	0.98	0.08	0.04	0.86	1.14
242557	Atg4c	0	0	0	0	0	0	0	0	0	0	0	0	0	0	0	0	0	0	0	0	0	0	0	0	0	0	0	0	0	0.01	0	0	0.01	0	0	0	0	0	0	0	0	0	0	0.01	0
235040	Atg4d	0	0	0.03	0	0	0	0	0	0	0	0	0	0	0	0	0	0	0	0	0	0	0	0	0	0	0	0	0	0	0	0	0	0	0	0	0	0	0	0	0	0	0	0	0	0
11793	Atg5	0.03	0	0.01	0.05	0	0.02	0	0.05	0.01	0	0.03	0.01	0.02	0	0.02	0.01	0.1	0.08	0.03	0.03	0	0.02	0.13	0.05	0.15	0.59	0.17	0.08	0.66	0.66	0.15	1.84	0.12	0.46	1.59	0.78	0.07	0.04	0.06	1.79	0.01	0.01	0	0.46	0.04
74244	Atg7	0.06	0.01	0.1	0.58	0.47	0.03	0.07	0.09	0.04	0.06	0.02	0.04	0.1	0.03	0.1	0.01	0.02	0.11	0.18	0.23	0.05	0.02	0.12	0.1	0.36	0.74	0.13	0.14	0.46	0.19	0.37	0.12	0.16	0.32	0.23	0.38	0.96	0.5	0.49	1.34	0.26	0.58	0.4	0.74	0.33
245860	Atg9a	0.03	0.03	0.03	0	0.04	0.02	0.04	0.02	0.02	0	0	0.03	0	0.02	0	0	0	0	0.06	0	0	0	0.06	0	0	0	0	0	0	0	0	0	0.03	0	0	0	0.03	0	0.05	0	0	0	0.03	0.01	0.02
213948	Atg9b	0	0	0	0	0	0	0	0	0	0.07	0	0	0	0	0	0	0	0	0	0	0	0.01	0	0	0	0	0	0	0	0	0	0	0	0	0	0	0	0	0	0	0	0	0	0	0
108147	Atic	12.45	10.84	21.28	11.51	10.64	9.72	8.05	7.89	9.65	8	5.24	8.11	7.85	5.73	7.37	5.17	6.12	10.1	6.49	6.06	9.05	7.11	10.17	7.06	8.85	9.85	7.01	6.34	6.3	4.77	5.79	8.81	5.24	3.91	4.21	5.59	3.49	5.17	4.19	5.81	5.73	4.04	4.48	3.32	3.21
73991	Atl1	0	0	0.01	0.02	0.02	0.01	0.01	0.01	0.02	0.01	0.01	0.01	0.01	0.01	0.01	0.04	0.04	0.02	0.09	0.02	0.03	0.03	0.04	0.07	0.22	0.07	0.08	0.05	0.06	0.07	0.14	0.09	0.13	0.08	0.01	0.07	0.06	0.1	0.14	0.14	0.16	0.01	0.09	0.11	0.18
56298	Atl2	0.2	0.2	0.22	0.15	0.16	0.2	0.2	0.18	0.16	0.39	0.1	0.16	0.24	0.12	0.19	0.16	0.12	0.37	0.74	0.28	0.56	0.22	0.62	0.34	1.28	0.38	0.33	0.1	2.18	0.93	0.4	0.27	1.08	2.29	0.6	0.71	1.1	0.81	0.78	1.68	1.78	0.73	1.04	0.86	1.92
109168	Atl3	0.2	0.13	0.5	0.27	0.25	0.23	0.28	0.33	0.28	0.29	0.26	0.24	0.21	0.25	0.38	0.25	0.17	0.52	0.28	0.39	0.35	0.26	0.44	0.32	0.64	0.6	0.44	0.89	1.23	1.25	1.54	1.41	1.73	1.72	1.95	2.2	1.37	3.24	2.49	1.62	1.89	1.22	1.69	1.96	1.78
11920	Atm	0	0.01	0	0.03	0	0	0.01	0	0	0	0	0	0	0	0	0	0	0	0	0	0	0	0	0.01	0	0	0	0	0	0.02	0	0	0	0	0	0	0	0.03	0	0	0	0	0	0	0
71093	Atoh8	0	0	0	0	0	0	0	0	0	0	0	0	0	0	0	0	0	0	0	0	0.01	0	0	0	0	0	0	0	0	0	0	0	0	0	0	0	0	0	0	0	0	0	0	0	0
11927	Atox1	2.04	3.62	11.05	6.67	6.05	4.74	5.85	7.38	8.81	6.31	7.56	7.61	3.42	6.38	10	3.7	5.22	15.58	17.14	18.73	5.92	10.17	16.7	17.86	15.48	17.68	26.66	13.97	17.6	34.44	15.7	39.6	34.65	27.21	38.42	60.79	12.49	37.82	35.22	26.66	42.5	20.92	24.21	15.44	15.82
50770	Atp11a	0	0	0	0	0	0	0	0	0.01	0	0	0	0	0	0	0	0	0	0	0	0	0	0	0	0	0	0	0	0	0	0.06	0.05	0	0.05	0.01	0.09	0.13	0.22	0.14	0.14	0.12	0.17	0.34	0.39	0.28
76295	Atp11b	0	0	0.01	0	0.01	0	0	0.02	0.02	0	0.01	0.01	0	0	0	0	0	0	0	0	0.02	0	0	0	0.01	0	0	0	0	0	0	0.01	0	0	0.02	0.04	0	0.03	0.02	0.06	0.03	0.03	0.07	0.07	0.04
320940	Atp11c	0	0	0	0	0	0	0	0.01	0.01	0	0	0	0	0	0	0	0	0.01	0	0	0	0	0	0	0.02	0.01	0.02	0.07	0.44	0.25	0.57	2.03	0.38	0.72	1.36	1.5	1.34	3.73	2.88	4.17	3.57	2.53	3.39	3.85	4.26
192113	Atp12a	0.08	0.07	0.07	0.08	0.07	0.07	0.13	0.18	0.13	0.07	0.08	0.07	0.09	0.08	0.12	0.13	0.09	0.3	0.17	0.16	0.15	0.16	0.24	0.17	0.36	0.32	0.31	0.25	0.36	0.49	0.47	0.44	0.44	0.51	0.58	0.6	0.42	0.49	0.47	0.57	0.37	0.35	0.31	0.59	0.38
170759	Atp13a1	0.05	0.09	0.24	0.29	0.16	0.06	0.12	0.24	0.16	0.06	0.1	0.15	0.22	0.07	0.31	0.12	0.11	0.18	0.14	0.23	0.16	0.09	0.24	0.5	0.44	0.56	0.46	0.43	0.59	1.38	0.65	0.59	1.24	0.89	0.73	0.8	0.34	0.57	0.52	0.56	0.19	0.22	0.51	0.56	0.71
74772	Atp13a2	0	0	0	0	0	0	0	0	0	0	0	0	0	0	0	0	0	0	0	0	0	0	0	0	0	0	0.03	0	0	0	0	0	0	0	0	0	0	0	0	0	0	0	0	0	0
224088	Atp13a3	0	0	0.15	0.01	0.02	0.14	0.04	0	0.04	0	0	0	0	0.05	0	0	0	0	0	0	0	0	0	0	0	0	0	0	0	0.03	0	0	0.01	0	0	0	0	0	0	0	0	0	0	0	0
224079	Atp13a4	0	0	0.08	0	0	0	0	0	0	0	0	0	0	0	0	0	0	0	0	0	0	0	0	0	0.06	0	0	0	0	0	0	0	0	0	0	0	0	0	0	0	0	0	0	0	0
268878	Atp13a5	0	0	0.08	0	0	0	0	0	0	0	0	0.01	0	0	0	0	0.02	0	0	0	0.01	0	0	0	0.06	0	0	0	0	0	0	0	0	0	0	0	0	0	0	0	0	0	0	0	0
11928	Atp1a1	1.89	1.68	2.37	1.72	1.5	1.51	1.64	2.09	1.9	1.17	1.7	1.34	2.4	1.89	2.28	2.06	1.71	3.37	3.16	3.98	2.32	2.71	5.25	2.97	7.08	5.82	3.63	5.45	6.58	6.39	7.84	9.34	6.48	10.04	9.1	10.17	7.42	8.59	6.77	8.07	8.18	6.65	6.31	7.47	7.33
98660	Atp1a2	0.18	0.23	0.34	0.22	0.23	0.25	0.3	0.38	0.31	0.16	0.27	0.2	0.23	0.29	0.26	0.26	0.28	0.54	0.37	0.46	0.37	0.34	0.77	0.47	1.09	0.94	0.74	0.76	1.23	1.16	1.24	1.37	1.02	1.42	1.59	1.64	2.24	1.97	1.56	1.16	1.19	1.07	1.31	1.09	1.31
232975	Atp1a3	0.19	0.24	0.36	0.23	0.24	0.26	0.31	0.39	0.32	0.16	0.28	0.2	0.24	0.3	0.27	0.27	0.29	0.56	0.39	0.48	0.38	0.35	0.8	0.49	1.14	0.98	0.77	0.79	1.28	1.21	1.29	1.43	1.07	1.48	1.65	1.71	1.33	2.05	1.62	1.21	1.24	1.11	1.37	1.13	1.36
27222	Atp1a4	0.11	0.16	0.15	0.11	0.11	0.13	0.16	0.26	0.18	0.1	0.15	0.13	0.15	0.18	0.17	0.18	0.19	0.39	0.26	0.23	0.18	0.24	0.37	0.29	0.72	0.43	0.54	0.36	0.96	0.65	0.8	0.65	0.69	0.98	0.9	1.04	0.67	1.01	0.94	0.9	0.52	0.58	0.68	0.83	0.78
11931	Atp1b1	0.06	0.06	0.06	0.12	0.1	0.1	0.41	0.67	0.24	0.3	0.29	0.59	0.42	0.22	1.29	0.8	0.56	1.54	3.06	3.06	2.9	2.16	3.25	1.71	4.14	3.45	2.58	3	5.02	4.28	4.39	2.96	4.96	5.8	5.5	8.43	4.77	5.32	4.46	5.6	5.91	4.38	4.13	4.24	5.06
11932	Atp1b2	0.13	0.23	0.1	0.16	0.06	0.13	0.08	0.08	0.04	0.04	0.04	0	0.06	0	0.02	0.05	0.03	0.02	0	0	0.02	0	0.03	0	0	0	0.01	0	0.02	0	0	0	0	0	0	0	0	0	0	0	0	0	0	0	0
11933	Atp1b3	0.67	0.57	1.09	1.1	1.12	0.89	0.61	0.58	0.4	0.74	0.42	0.68	0.66	0.5	0.75	0.34	0.48	0.9	0.54	0.23	0.35	0.54	0.53	0.29	0.43	0.65	0.45	0.64	0.53	0.98	0.77	0.57	0.3	0.55	0.5	0.65	0.91	0.8	0.89	0.46	0.15	0.22	1.11	1.08	1.3
67821	Atp1b4	0	0	0	0	0	0	0	0	0	0	0	0	0	0	0	0	0	0	0	0	0	0	0	0	0	0	0.01	0	0	0	0	0	0	0	0	0	0	0	0	0	0	0	0	0	0
68876	Atp23	0	0	0	0	0	0	0	0	0	0	0	0.01	0	0	0.01	0	0	0	0	0	0	0	0	0	0	0	0	0	0	0	0	0	0	0	0	0	0	0	0	0	0	0	0	0	0
11937	Atp2a1	0.24	0.46	0.4	0.35	0.28	0.19	0.38	0.38	0.32	0.16	0.28	0.41	0.14	0.27	0.59	0.22	0.17	0.8	0.36	0.59	0.25	0.44	0.65	0.47	0.88	0.87	0.91	1.33	2.04	1.25	0.99	1.07	1.44	0.95	1.53	1.08	0.51	0.98	0.91	0.41	0.74	0.52	0.56	0.71	0.58
11938	Atp2a2	0.91	1.49	2.1	1.34	1.2	0.9	1.15	1.18	1.16	0.75	1.26	1.26	0.81	1.25	1.71	0.94	1.21	2.56	1.77	2.11	1.63	1.25	2.74	2.16	4.55	3.94	4.43	4.19	6.2	5.05	3.81	5.4	6.35	5.23	5.53	5.48	3.37	3.8	4.05	3.79	2.82	3.62	2.13	2.72	2.75
53313	Atp2a3	0.07	0.11	0.27	0.1	0.11	0.07	0.11	0.13	0.08	0.09	0.1	0.08	0.03	0.08	0.06	0.1	0.08	0.57	0.17	0.29	0.38	0.22	0.34	0.21	0.73	0.43	0.26	0.41	1.08	0.39	0.11	0.52	0.41	0.86	0.43	0.35	0.49	0.4	0.25	0.46	0.36	0.23	0.14	0.23	0.21
67972	Atp2b1	0.09	0.08	0.14	0.08	0.2	0.16	0.08	0.1	0.12	0.05	0.11	0.16	0.06	0.07	0.05	0.1	0.05	0.07	0.14	0.07	0.06	0.28	0.14	0.09	0.14	0.1	0.33	0.19	0.21	0.12	0.26	0.16	0.16	0.17	0.18	0.09	0.13	0.04	0.08	0.05	0.04	0.03	0.06	0.03	0.04
11941	Atp2b2	0.01	0.02	0.03	0.02	0.04	0.02	0.02	0.02	0.03	0.02	0.02	0.07	0.02	0.02	0.11	0.02	0.01	0.02	0.01	0.02	0.14	0.01	0.02	0.04	0.02	0.02	0.06	0.01	0.07	0.02	0.02	0.04	0.04	0.01	0.02	0.02	0.02	0.01	0.02	0.01	0	0.01	0.01	0.01	0.01
320707	Atp2b3	0.02	0.03	0.03	0.02	0.03	0.02	0.02	0.02	0.02	0.02	0.02	0.01	0.02	0.02	0.02	0.02	0.02	0.01	0.01	0.01	0.01	0.01	0.02	0.01	0.02	0.02	0.02	0	0.04	0.01	0.03	0.04	0.03	0.02	0.01	0.01	0.02	0.01	0.01	0.01	0	0	0	0.01	0.01
381290	Atp2b4	0.08	0.19	1.42	0.32	0.68	0.87	0.3	0.27	0.69	0.08	0.25	0.13	0.34	0.18	0.19	0.07	1.13	0.14	0.08	0.55	0.25	0.47	0.22	0.13	0.06	0.06	0.09	0.06	0.07	0.02	0.08	0.19	0.03	0.05	0.01	0.06	0.09	0.04	0.04	0.04	0.08	0.02	0.04	0.07	0.02
235574	Atp2c1	0	0	0.03	0.04	0	0.1	0	0.02	0	0.01	0	0	0	0.01	0	0	0	0	0.01	0.01	0	0	0	0	0	0	0.04	0	0	0.01	0	0	0	0	0.11	0	0	0	0	0	0	0	0	0	0
11944	Atp4a	0.07	0.09	0.09	0.07	0.07	0.11	0.07	0.07	0.09	0.06	0.11	0.07	0.11	0.08	0.13	0.11	0.08	0.22	0.14	0.14	0.08	0.13	0.33	0.17	0.33	0.4	0.14	0.31	0.29	0.28	0.49	0.67	0.23	0.36	0.59	0.32	0.37	0.5	0.53	0.37	0.37	0.34	0.34	0.37	0.37
11946	Atp5a1	39.24	43.4	55.65	22.35	40.59	33.11	27.25	40.96	45.16	44.61	32.86	40.02	42.01	30.83	58.78	39.83	41.21	92.58	80.83	64.97	47.18	115.24	123.2	143.21	352.74	188.53	219.87	261.77	213.75	233.21	427.22	271.51	241.78	498.04	403.11	464.97	554.19	432.98	349.56	376.63	316.04	387.1	254.13	311.06	282.98
11947	Atp5b	69.58	58.33	75.66	55.32	53.14	65.41	55.45	83.16	80.29	85.48	59	68.25	84.45	55.15	110.61	105.36	88.38	182.19	141.49	191.21	119.18	188.83	269.24	240.39	539.14	500.16	352.34	435.61	356.59	428.96	819.48	519.04	449.84	888.87	611.49	685.16	726.2	695.45	617.25	679.92	693.73	544.21	465.09	545.62	536.19
11949	Atp5c1	12.89	12.66	18.22	10.54	15.34	13.23	12.73	14.22	16.03	11.96	8.1	12.85	11.2	7.26	24.09	11.6	14	43.94	23.34	27.06	12.89	30.01	43.83	57.36	94.06	47.66	103.91	62.47	108.08	78.22	96.42	75.45	107.65	155.46	185.46	187.61	131.62	208.6	157.13	186.24	96.25	135.43	104.22	133.65	166.68
66043	Atp5d	13.01	13.92	13.39	13.08	5.99	8.95	15.03	19.62	14.38	24.22	8.76	12.29	15.46	8.2	6.05	13.16	19.23	29.79	28.52	16	19.19	51.48	41.19	56.29	87.73	121.43	65.26	119.51	56.12	55.51	192.23	144.09	106.6	241.7	217.64	181.97	229.47	134.09	142.97	112.11	199.5	218.48	184.15	102.4	113.12
67126	Atp5e	3.82	7.11	5.23	3.11	0	5.8	9.53	5.83	7.76	2.85	5.99	5.48	2.32	2.97	4.13	4.35	5.89	12.3	4.64	5.32	17.97	7.69	10.27	11.33	18.8	10.19	9.28	35.4	28.37	13.78	53.84	13.96	42.61	32.99	82.34	40.34	44.47	16.39	50.81	23.67	15.17	91.49	32.35	31.65	32.32
11950	Atp5f1	5.64	2.98	5.37	3.76	3.58	3.19	5.14	6.9	4.96	2.98	3.34	3.07	4.17	3.18	4.29	5.9	3.94	14.89	9.05	9.73	8.51	10.76	15.36	12.29	24.84	17.81	28.58	23.99	25.78	31.29	50.93	25.98	27.23	69.39	44.48	50.55	44.55	54.02	56.5	37.89	34.05	48.66	52.91	26.35	48.2
11951	Atp5g1	0	0	0	0	0	0	0	0	0	0	0	0	0	0.04	0	0	0	0	0	0	0	0	0	0	0	0	0	0	0.12	0	0	0	0	0	0	0	0	0	0	0	0	0	0	0	0
228033	Atp5g3	0	0	0	0	0	0	0	0	0	0	0	0	0	0.04	0	0	0	0	0	0	0	0	0	0	0	0	0	0	0.14	0.03	0	0	0	0	0	0	0	0	0	0	0	0	0	0	0
71679	Atp5h	10.55	8.92	15.86	10.36	12.2	9.76	11.61	19.25	12.7	9.6	12.55	14.12	14.54	7.88	18.81	15.7	19.02	37.42	26.71	20.47	23.64	32.91	37.4	49.17	126.98	66.56	68.02	59.71	53.76	83.52	152.59	62.62	94.5	112.28	105.74	142.69	120.67	139.8	119.44	139.84	100.48	123.76	88.04	131.36	113.59
11957	Atp5j	3.37	3.98	7.75	5.51	7.44	6.76	4.2	6.56	7.58	3.97	6.6	5.93	4.26	5.22	9.39	5.76	4.6	13.22	17.12	20.43	19.38	9.77	24.28	16.31	32.88	15.52	16.2	90.74	5.53	33.76	44.87	39.38	21.29	42.72	62.22	55.86	45.13	42.85	31.6	76.18	60.81	70.71	49.25	32.07	19.19
57423	Atp5j2	2.61	5.49	6.36	5.55	4.76	4.66	5.15	8.19	10.75	2.49	1.41	7.26	5.99	9.93	9.67	11.17	10.91	14.61	13.42	14.09	18.05	21.13	21.96	13.03	45.01	28.8	46.76	27.43	32.88	25.63	146.55	50.61	25.21	77.48	69.56	57.69	41.35	45.63	53.5	83.01	57.67	96.68	34.63	31.37	36.45
11958	Atp5k	24.4	25.33	30.39	27.26	26.86	26.78	16.53	33.48	35.24	23.06	16.67	22.29	19.6	28.77	40.76	27.92	23.46	46.23	60.62	46.35	88.75	35.19	53.91	85.53	145.35	143.56	101.96	73.1	219.66	190.4	84.57	200.8	134.11	186.36	311.19	279.36	117.86	273.07	216.9	170.39	151.92	325.91	178.98	157.48	158.62
27425	Atp5l	4.58	7.49	5.01	5.24	6.81	4.66	3.92	4.99	7.69	6.75	5.61	8.65	5	8.43	9.36	7.54	8.48	16.76	13.56	8.44	14.69	19.39	17.58	15.35	49.11	32.35	24.74	41.62	32.36	19.99	56.31	62.76	40.58	101.85	38.43	51.21	60.22	92.34	60.76	45.09	34.36	42.97	52.4	85.03	44.53
66477	Atp5md	2.2	5.54	2.39	0.35	3.44	1.67	1.57	3.52	2.85	2.48	3.12	2.05	3.49	1.79	3.61	4.26	5.75	3.99	10.69	1.34	5	7.52	2.85	5.96	39.15	5.57	11.42	22.19	17.53	16.26	22.5	17.9	32.17	34.76	51.97	42.09	41.69	55.26	76.9	70.56	30.97	76.76	42.03	61.56	53.91
70257	Atp5mpl	1.67	2.77	3.04	3.04	1.81	2.59	1.73	3.41	2.17	2.44	2.31	2.15	1.94	2.44	4.08	3.34	2.5	5.03	0.68	8.21	6.66	0.73	8.89	5.97	16.82	3.36	20.06	19.99	16.81	18.1	19.31	11.73	27.22	17.68	84.22	27.18	21.45	55.39	33.01	3.61	25.25	24.38	39.89	23.21	29.3
28080	Atp5o	5.96	3.14	5.52	2.52	4.03	2.52	1.98	3.34	3.46	4.61	3.25	5.29	5.34	2.57	7.92	4.73	4.24	11.92	4.1	8.01	8.88	8.5	14.74	19.14	37.85	22.71	21.83	21.04	23.44	26.5	41.46	27.78	24.61	64.38	53.75	52.81	61.35	51.21	47.89	60.22	72.28	37.51	44.34	41.24	33.16
17705	ATP6	0.13	0.11	1.09	0.18	0.51	0.67	0.13	1.03	0.83	0.43	0.1	0.49	0.25	0.18	0.68	0.41	0.32	1.57	0.94	0.4	0.19	0.25	0.6	1.28	0.3	0.35	5.03	2.13	1.68	1.89	3.88	0.96	5.44	0.73	5.83	4.44	4.4	5.22	7.05	7.76	3.34	5.33	10.05	9.88	11.99
54411	Atp6ap1	0.06	0.05	0.11	0.17	0.03	0.07	0.09	0.1	0.04	0.08	0.05	0.07	0.09	0.08	0.03	0.04	0.06	0.11	0.07	0.16	0.12	0.02	0.17	0.11	0.09	0.01	0.13	0.15	0.09	0.08	0.24	0	0.13	0.04	0.08	0.06	0	0.11	0.13	0	0	0.03	0.1	0.15	0.11
70495	Atp6ap2	0.08	0	0.05	0.04	0.09	0.04	0.04	0.1	0.02	0.1	0.03	0	0.02	0.01	0	0.1	0	0	0.02	0.01	0	0.02	0.06	0	0.01	0	0	0.08	0	0	0	0	0.07	0	0	0	0	0	0	0	0	0	0	0	0
11975	Atp6v0a1	0.14	0.12	0.23	0.11	0.33	1.7	0.11	0.21	0.15	0.13	0.16	0.12	0.14	0.14	0.14	0.1	0.18	0.18	0.19	0.17	0.14	0.1	0.22	1.2	0.25	0.25	0.21	0.16	0.25	0.2	0.3	0.33	0.2	0.22	0.1	0.07	0.18	0.13	0.12	0.1	0.11	0.1	0.14	0.28	0.22
21871	Atp6v0a2	0.01	0	0	0.02	0	0	0	0	0.01	0.01	0.01	0.02	0.01	0	0	0.02	0.01	0.01	0.02	0.01	0	0	0.01	0	0.02	0.01	0.02	0	0.03	0.02	0.02	0.04	0.02	0.01	0.01	0	0.01	0.01	0.01	0.01	0.01	0.01	0	0.01	0.02
140494	Atp6v0a4	0	0	0	0	0	0	0	0	0.01	0.01	0	0.01	0	0	0	0	0	0	0	0	0	0	0	0	0.01	0	0.01	0	0.01	0.01	0.01	0.01	0	0.01	0	0	0	0	0.01	0	0	0.01	0	0	0.01
11972	Atp6v0d1	0.43	0.46	0.68	0.67	0.58	0.4	0.57	0.95	0.77	0.43	0.57	0.65	0.59	0.48	0.54	0.56	0.55	0.98	0.53	0.57	0.83	0.28	1.44	0.61	1.69	1.45	1.26	1.23	0.27	2.13	1.85	1.32	1.79	0.77	1.31	1.36	0.68	1.48	1.28	1.16	0.54	0.72	1.04	1.07	1.56
11964	Atp6v1a	1.55	1.87	2.77	1.77	1.78	2.13	2	3.28	2.82	2.13	2.33	2.61	2.61	2.04	2.48	2.59	2.38	4.45	2.84	3.45	3.08	2.66	3.52	2.94	5.66	6.06	4.43	5.02	3.92	4.23	5.03	5.19	5.03	4.61	4.62	3.32	3.38	3.12	2.43	4.34	1.67	1.91	1.82	4.72	3.34
110935	Atp6v1b1	0.92	0.3	0.55	0.62	0.56	0.24	0.5	0.61	0.67	0.4	0.31	0.74	0.78	0.37	0.73	0.54	0.6	1.13	0.77	0.87	1.28	0.55	0.84	0.59	1.46	1.1	0.79	2.15	0.63	1.04	1.34	1.56	1.3	1.58	1.26	0.88	1.02	0.78	0.69	1.73	0.74	0.73	1.42	1.54	0.47
11966	Atp6v1b2	1.99	1.58	2.19	1.71	2.55	1.96	2.18	4.12	2.18	1.64	1.58	2.65	2.27	1.39	3.01	4.61	1.65	5.21	3.04	3.6	4.71	2.16	3.64	3.16	4.23	4.79	6.32	4.56	4.41	6.89	3.77	5.25	4.92	4.84	3.9	4.1	2.78	3.47	2.9	3.09	2.03	2.21	3.37	3.23	1.52
66335	Atp6v1c1	0.14	0.19	0.65	0.2	0.76	0.24	0.24	0.65	0.94	0.15	0.31	0.37	0.24	0.22	0.75	0.26	0.26	1.18	0.33	0.33	0.63	0.21	0.59	2.15	0.28	0.43	0.59	0.51	0.71	3.28	0.63	0.68	3.47	0.56	0.33	2.06	0.14	1.07	1.16	0.09	0.57	0.02	0.37	1.06	0.87
68775	Atp6v1c2	0	0	0.04	0	0.01	0	0.01	0	0.02	0	0	0	0	0	0	0	0.02	0	0.03	0.02	0	0	0.03	0.02	0	0.04	0.02	0	0.03	0	0	0	0.03	0	0	0.07	0	0	0.02	0	0.02	0	0	0	0
73834	Atp6v1d	0.06	0.43	0.75	0.15	0.13	0.38	0.12	0.11	0.17	0.12	0.11	0.52	0.24	0.28	0.15	0.17	0.29	0.93	0.53	0.27	0.15	0	0.43	0.63	0.55	0.8	0.99	0.7	0.41	1.07	0.58	0.23	0.35	0.18	0.6	3.62	0.13	0.83	0.75	0.44	0.08	0.23	0.04	0.43	0.19
11973	Atp6v1e1	0.61	0.58	1.66	0.69	1.28	1.21	0.46	1.81	0.83	0.67	0.73	0.99	1.22	1.53	1.27	1.28	1.02	2.35	0.48	1.1	1.51	1.14	2.83	4.62	2.35	1.72	4.68	2.29	2.73	4.1	3.81	3.89	5.66	4.54	2.98	2.13	2.43	2.45	3.62	2.2	1.37	0.66	3.42	0.51	1.93
74915	Atp6v1e2	0.07	0.06	0.23	0.02	0.01	0.03	0.02	0.2	0.08	0.02	0	0.01	0.07	0.07	0.04	0.05	0.02	0.09	0.04	0.11	0.03	0.04	0.18	0.04	0.11	0.25	0.14	0.19	0.05	0.3	0.24	0.36	0.05	0.24	0.4	0	0.13	0.14	0	0.07	0.07	0.08	0	0.01	0.09
66144	Atp6v1f	1.4	0.68	1.85	0.9	0.87	0.84	0.89	0.92	0.83	0.84	0.71	0.94	0.84	0.34	2.14	0.84	0.91	1.78	2.05	0.66	0.47	0.6	1.66	3.08	2.97	3.96	1.2	0.92	1.97	2.99	1.72	1.72	2.84	1.92	0.96	3.94	3.68	1.73	1.51	0.15	0.25	1.21	1.32	2.21	1.06
66290	Atp6v1g1	1.63	1.68	2.89	1.84	1.42	1.2	1.6	1.44	0.99	1.05	0.89	1.79	1.26	1.6	2.37	0.8	1.57	2.3	2.8	1.74	1.9	1.82	4.25	6.23	2.84	3.67	5.15	4.39	4.09	7.5	4.5	5.5	6.28	3.84	4.76	5.55	1.01	3.51	3.11	1.75	1.22	2.1	1.06	2	2
66237	Atp6v1g2	0	0	0	0	0	0	0	0	0	0	0	0	0	0	0	0	0	0	0	0	0	0	0	0	0	0	0	0	0	0	0	0.03	0	0	0	0	0	0	0	0	0	0	0	0	0
108664	Atp6v1h	0.12	0.22	0.76	0.18	0.44	0.32	0.38	0.41	0.43	0.19	0.23	0.35	0.22	0.19	0.44	0.19	0.3	0.92	0.36	0.5	0.47	0.2	0.53	0.58	0.61	0.71	0.7	0.56	0.54	0.62	0.83	1.18	0.95	0.6	1.02	0.48	0.56	0.75	0.32	0.29	0.31	0.34	0.29	0.26	0.27
11977	Atp7a	0.01	0	0.03	0.03	0.05	0.01	0.02	0.04	0.02	0.01	0	0.03	0	0	0.02	0.03	0.01	0.08	0.03	0.03	0	0.01	0.12	0.05	0.02	0.02	0	0.01	0.01	0.01	0.02	0	0.01	0	0.01	0	0.02	0	0	0	0	0.01	0	0	0
11979	Atp7b	0.89	0.02	0.14	0.05	0.06	0.89	0.11	0.05	0.04	0.03	0.02	0.06	0.02	0.01	0.33	0.1	0.08	0.11	0.03	0.06	0.08	0.02	0.1	0.05	0.07	0.12	0.11	0.09	0.06	0.02	0.08	0.09	0.09	0.05	0.06	0.01	0.01	0.03	0.3	0.02	0	0.01	0.01	0.17	0
17706	ATP8	0.46	1.2	1.55	2.26	0.95	1.69	2.41	1.54	1.35	3.32	2.16	1.51	1.62	1.28	1.57	3.02	2.43	3.62	2.5	3.31	2.44	6.65	11.34	5.24	7.64	6.05	5.22	26.73	9.23	13.49	67.43	7.69	12.45	56.88	27.44	37.13	57.03	41.38	42.01	27.98	13.33	50.6	16.78	17.68	18.72
11980	Atp8a1	0.03	0.03	0.01	0.06	0.01	0.02	0.03	0.02	0.01	0.04	0.03	0.01	0.03	0.03	0	0.04	0	0.04	0.01	0.12	0	0.02	0	0.35	0	0	0.13	0.01	0.04	0	0	0.09	0.01	0	0.23	0	0	0	0	0	0	0	0	0	0
50769	Atp8a2	0	0	0	0	0	0	0	0	0	0	0	0.05	0	0	0	0	0	0.02	0	0	0	0	0.01	0.06	0	0.01	0.13	0.01	0.03	0.01	0.03	0.04	0.02	0.07	0.23	0.01	0	0	0	0	0	0	0	0	0
54670	Atp8b1	0	0	0	0	0	0	0	0	0	0	0	0	0	0	0	0	0	0	0	0	0	0	0	0.07	0	0	0.05	0	0	0.01	0	0	0.03	0	0	0.06	0	0.01	0	0	0	0	0	0	0
54667	Atp8b2	0	0	0	0	0	0	0	0	0	0	0	0	0	0	0	0	0	0	0	0	0	0	0	0.12	0	0.03	0	0.03	0	0.01	0.07	0	0	0	0.07	0.01	0	0	0	0	0	0	0	0	0
67331	Atp8b3	0	0	0	0	0	0	0	0	0	0	0	0	0	0	0	0	0	0	0	0	0	0	0	0.05	0	0	0	0	0	0.01	0	0	0	0	0	0.01	0	0	0	0	0	0	0	0	0
320571	Atp8b5	0	0	0	0.02	0	0	0	0	0	0	0	0	0	0	0	0	0	0	0	0	0	0	0	0.05	0	0	0	0	0	0.01	0	0	0	0	0	0.01	0	0	0	0	0	0	0	0	0
11981	Atp9a	0	0	0	0	0	0	0	0	0	0	0	0	0	0	0	0	0	0	0	0	0	0	0.01	0	0	0	0	0	0.01	0	0	0	0.01	0	0	0.01	0	0.01	0.01	0	0	0	0	0.02	0
50771	Atp9b	0	0	0.02	0.07	0.08	0	0.13	0	0.03	0	0	0	0.01	0.05	0	0	0.01	0.01	0.01	0.05	0	0	0.01	0.01	0.01	0.13	0	0.05	0.01	0.05	0.03	0.01	0.04	0.11	0.01	0.09	0.02	0.01	0.13	0.01	0	0	0.09	0.06	0
230649	Atpaf1	0.02	0.03	0.07	0.01	0.04	0.02	0	0.03	0.06	0.02	0.03	0.08	0.04	0.39	0.02	0.03	0	0.13	0.02	0.77	0.04	0	0.45	0.06	0	3.06	0	0	0.02	0.02	0	0.02	0.02	0.04	0.16	0.03	0.02	0.02	0.01	0.02	0	0.23	0	0.13	0
246782	Atpaf2	0.3	0.15	0.12	0.06	0.12	0.17	0.07	0.14	0.18	0.24	0.11	0.18	0.11	0.07	0.18	0.14	0.03	0.09	0.16	0.19	0.04	0.05	0.16	0.16	0.54	0.51	0.14	0.48	0.4	0.43	1.78	0.76	0.51	1.32	0.96	0.55	1.09	0.2	0.23	0.15	0.25	0.15	0.15	0.22	0.12
11983	Atpif1	0.02	0.01	0.03	0.02	0	0.03	0	0.06	0.02	0	0	0.35	0	0.04	0.27	0	0	0	0	0	0.18	0	0	0	0	0	0	0	0	0	0	0	0	0	0	0	0	0	0	0	0	0	0	0	0
68073	Atpsckmt	0	0	0	0	0	0	0	0	0	0	0	0	0	0	0	0	0	0	0	0	0	0	0	0	0	0	0.01	0	0	0	0.02	0	0.13	0	0	0	0	0	0	0	0	0	0	0	0
245000	Atr	0	0	0	0	0.02	0	0	0	0	0	0	0	0	0	0	0	0	0	0	0	0	0	0	0	0	0.01	0	0	0	0	0	0	0	0	0	0	0	0	0	0	0	0	0	0	0
381629	Atraid	0	0	0	0	0	0	0	0	0	0	0	0	0	0	0	0	0	0	0	0.02	0	0	0	0	0	0	0	0	0	0	0	0	0	0	0	0	0	0	0	0	0	0	0	0	0
235610	Atrip	0	0.11	0	0	0.02	0	0	0	0	0	0	0	0	0.21	0	0	0	0	0	0	0	0	0	0	0	0	0	0	0	0	0	0	0	0	0	0	0	0	0	0	0	0	0	0	0
11990	Atrn	0	0	0	0	0	0	0	0	0	0	0	0	0	0	0	0	0	0	0	0	0	0	0	0	0.01	0	0	0.01	0.01	0.03	0	0	0	0	0	0	0	0	0	0	0	0	0	0	0.02
22589	Atrx	0.24	0.05	0.22	0.17	0.28	0.27	0.16	0.24	0.04	0.2	0.04	0.33	0.04	0.02	0.02	0.28	0.03	0.25	0.13	0.02	0.04	0.09	0.27	0.16	0.22	0.41	0.2	0.26	0.03	0.24	0.16	0.19	0.17	0.17	0.05	0.02	0	0.02	0.01	0	0	0	0	0.01	0
20238	Atxn1	0	0	0	0	0	0	0	0	0	0	0	0	0	0	0	0	0	0	0.01	0.01	0	0	0	0	0	0	0	0	0	0	0	0	0	0.01	0.01	0	0	0	0	0	0.01	0	0	0	0
54138	Atxn10	1.41	1.05	4.26	1.01	2.07	1.33	0.78	2.38	2.36	0.57	0.8	0.72	0.92	0.79	0.82	0.87	0.7	3.34	0.92	1.44	0.83	0.29	1.12	0.48	3.37	0.79	0.71	1.17	4.02	3.18	1.01	0.95	5.76	0.77	0.89	0.35	0.41	0.29	0.2	0.15	0.13	0.69	0.15	0.17	0.21
52335	Atxn1l	0.01	0	0	0	0	0	0	0	0	0	0	0	0	0	0	0	0	0	0	0.01	0	0	0	0	0	0	0.27	0	0	0	0	0	0	0	0	0	0	0	0	0	0	0	0	0	0
20239	Atxn2	0.07	0.1	0.5	0.12	0.18	0.14	0.11	0.18	0.15	0.07	0.06	0.06	0.07	0.06	0.08	0.08	0.14	0.1	0.08	0.08	0.08	0.08	0.15	0.27	0.23	0.18	0.26	0.16	0.14	0.64	0.24	0.39	0.34	0.24	0.23	0.18	0.2	0.36	0.27	0.53	0.11	0.33	0.36	0.28	0.28
233871	Atxn2l	0.97	0.96	1.43	0.64	0.46	1.21	0.8	0.53	0.39	0.72	0.74	0.84	0.77	0.69	0.36	1.02	0.39	0.75	0.38	0.93	0.33	0.38	0.67	0.48	0.34	0.27	0.49	0.32	0.23	0.17	0.2	0.2	0.38	0.13	0.09	0.21	0.14	0.06	0.28	0.07	0.06	0.05	0.1	0.1	0.14
110616	Atxn3	0.1	0.11	0.22	0.07	0.06	0.3	0.05	0	0.05	0.06	0.06	0.06	0.06	0.06	0.05	0.04	0.03	0.02	0.11	0.04	0.07	0.07	0.08	0.08	0.15	0.12	0.13	0.18	0.01	0.06	0	0.34	0.05	0.39	0.01	0	0	0.04	0.01	0	0	0	0	0	0
382423	Atxn7l3b	1.39	1.85	1.51	0.11	0.44	1.15	1.09	0.85	0.78	1.51	0	0.8	2.18	0.18	0.33	0.15	2.62	1.76	0.47	0	0.74	0.92	2.82	0.97	1.06	0.97	2.27	0.69	0.43	1.16	5.74	1.34	1.82	2.64	2.51	1.42	1.22	0.44	1.57	0.39	0.23	0.62	0.26	0.48	0.78
99169	AU015228	0.05	0.04	0.06	0.03	0.07	0.02	0.03	0.03	0.03	0.03	0.02	0.04	0.02	0.02	0.01	0.03	0.03	0.02	0.03	0.03	0.01	0	0.02	0	0.05	0.05	0.02	0.01	0	0	0.02	0.03	0.01	0.03	0.01	0.01	0.01	0.01	0	0	0	0	0.01	0	0.01
230696	AU022252	0.1	0.09	0.26	0.17	0.06	0.2	0.23	0.15	0.13	0.06	0.05	0.26	0.12	0.07	0.25	0.04	0.11	0.38	0.22	0.68	0.2	0.46	0.52	0.72	1.55	1.48	0.91	1.8	2.21	1.45	2.01	1.97	1.35	3.03	1.78	2.38	3.75	3.92	1.8	3.7	3.17	2.34	1.98	1.44	3
102991	AU022751	0	0	0	0	0	0	0	0	0	0	0	0	0	0	0	0	0	0	0	0	0	0	0	0	0	0	0	0	0	0	0	0	0	0	0	0	0	0	0	0	0	0.29	0	0	0
100317	AU040320	0	0	0	0	0	0.01	0	0	0	0	0	0	0.01	0	0	0	0	0	0	0	0	0	0	0	0.46	0.01	0	0.01	0	0	0	0.01	0	0.01	0.2	0	0	0	0	0	0	0	0	0	0
11992	Auh	0.27	0.22	0	0.19	0.04	0.11	0.22	0.1	0.17	0.21	0.06	0.04	0	0.03	0.12	0.23	0.07	0.14	0.18	0.5	0.07	0.43	0.55	0.36	0.91	0.89	0.56	1.58	1.02	0.81	2.53	2.05	1.48	3.27	3.66	2.23	2.4	2.53	2.02	1.29	2.1	2.13	1.73	1.4	2.18
11993	Aup1	0.03	0.07	0.03	0.04	0.08	0.12	0.11	0.08	0.06	0.07	0.02	0.12	0.03	0.02	0.13	0.1	0.09	0.21	0.04	0.17	0.16	0.1	0.08	0.12	0.29	0.31	0.1	0.08	0.24	0.43	0.25	0.4	0.32	0.18	0.2	0.36	0.28	0.08	0.18	0.33	0.14	0.05	0.22	0.22	0.36
20878	Aurka	0.07	0.12	0.08	0.13	0.08	0.05	0.09	0.02	0.09	0.01	0.05	0.03	0.08	0.03	0.03	0.01	0.01	0.01	0	0.02	0.02	0	0	0	0	0.01	0	0.01	0.01	0.01	0	0.01	0	0	0	0	0	0	0	0	0	0	0	0	0
66077	Aurkaip1	0.07	0.12	0	0.09	0.27	0.24	0.17	0.04	0.06	0.04	0.08	0.09	0	0.06	0	0	0	0	0	0	0.12	0	0	0	0	0	0	0	0	0	0	0	0.13	0	0	0.24	0	0	0	0	0	0	0	0	0
20877	Aurkb	0.23	0.22	0.79	0.33	0.68	0.25	0.3	0.41	0.23	0.18	0.28	0.29	0.25	0.42	0.22	0.13	0.09	0.05	0	0.43	0.01	0.02	0	0	0	0	0.01	0	0	0.06	0	0	0	0	0	0	0	0	0	0	0	0	0	0	0
319974	Auts2	0	0	0	0	0	0	0	0	0	0	0	0	0	0	0	0	0	0	0	0	0	0	0	0	0	0	0	0	0	0	0	0	0	0	0	0	0	0	0	0	0.01	0	0	0	0
74268	Aven	0	0.09	0.49	0.07	0.31	0.28	0.02	0.09	0.06	0	0.03	0.13	0.05	0.07	0.03	0	0.04	0.03	0.04	0.15	0.05	0	0	0.04	0	0.02	0.05	0	0	0	0	0	0	0	0.42	0	0	0	0	0.04	0.1	0	0	0	0
78937	Avl9	0	0	0	0	0	0	0	0.01	0	0.01	0	0.02	0	0	0	0	0	0	0	0.04	0.01	0	0.01	0	0.02	0	0	0	0	0	0	0	0	0	0	0	0	0	0	0	0	0	0	0	0
54140	Avpr1a	0	0	0	0	0	0	0	0	0	0	0	0	0	0	0	0	0	0	0	0	0	0	0	0	0	0	0	0	0	0	0	0	0	0	0	0	0	0.01	0	0	0	0	0	0	0
105351	AW209491	0.01	0.02	0.16	0	0	0	0.08	0	0	0.05	0	0.07	0.01	0	0	0	0	0	0	0	0	0	0.13	0	0.01	0.07	0.01	0.01	0	0	0	0	0	0.01	0	0	0	0	0	0	0	0	0.01	0.01	0
106064	AW549877	0.07	0	0.05	0.07	0	0.02	0.03	0.06	0.04	0.01	0	0.01	0	0	0.02	0.03	0.01	0.13	0.05	0.07	0.07	0.03	0.05	0	0	0.08	0.07	0.03	0.07	0.11	0.08	0.05	0.17	0.06	0.06	0.13	0.06	0.32	0.01	0.1	0.04	0	0.03	0.08	0.04
244810	AW551984	0.02	0.04	0.02	0.09	0.02	0.03	0.02	0.02	0.02	0.03	0.02	0.04	0.07	0.02	0.04	0.03	0.03	0.04	0.08	0.07	0.05	0.05	0.11	0.07	0.1	0.21	0.16	0.17	0.04	0.1	0.17	0.26	0.14	0.13	0.07	0.1	1.58	0.11	0.09	0.12	0.11	0	0.07	0.13	0.07
12005	Axin1	0	0	0	0	0	0	0	0	0	0	0	0	0	0	0	0	0	0	0	0	0	0	0	0	0	0	0	0	0	0	0	0.09	0	0	0	0	0	0	0	0	0	0	0.05	0	0
26362	Axl	0	0	0	0	0	0	0	0	0	0	0	0	0	0	0	0	0	0	0.01	0	0	0	0	0	0	0.01	0.02	0	0	0.01	0	0.01	0.01	0	0	0	0	0	0	0	0	0	0	0	0
246735	AY074887	0	0	0	0	0	0	0	0	0	0	0	0	0	0	0	0	0	0	0	0	0	0	0	0	0	0	0	0	0	0	0	0.13	0	0	0	0	0	0	0	0	0	0	0	0	0
278676	AY358078	0.03	0	0.14	0.02	0.05	0.09	0	0.03	0.03	0.02	0	0.03	0.01	0.01	0.13	0	0.01	0.03	0	0	0.13	0	0	0.01	0.02	0.03	0.01	0	0	0.03	0.01	0.03	0.02	0.01	0	0.02	0	0.02	0.32	0	0	0.01	0.01	0	0
12007	Azgp1	0	0	0	0	0	0	0	0	0	0	0	0	0	0	0.06	0	0.01	0.25	0.64	1.06	0.54	0.48	0.16	1.37	1.49	0.87	1.06	0.66	0.53	0.85	1.21	0.34	0.93	0.7	0.81	0.9	0.26	0.89	0.45	1.5	0.38	0.9	1.61	1.37	1.39
27215	Azi2	0.01	0	0.01	0	0.15	0.01	0	0	0	0	0	0.01	0	0	0	0	0	0	0.01	0	0	0	0.01	0	0.01	0	0	0.02	0	0	4.85	0	0	0	0	0	0	0	0	0	0	0	0	2.63	0
65964	B230120H23Rik	0.14	0.03	0.07	0.05	0.03	0.05	0.11	0.18	0.07	0.07	0.04	0.12	0.04	0.09	0.05	0.07	0.03	0.05	0.04	0.03	0	0.02	0.02	0.03	0.01	0.01	0.01	0.37	0	0.03	0.02	0	0	0.02	0	0.01	0.03	0.01	0	0	0	0	0.01	0.04	0
78521	B230219D22Rik	0	0	0	0.02	0	0	0	0.04	0.02	0	0	0	0	0.01	0	0	0	0	0	0	0	0	0	0	0	0	0	0	0	0	0	0	0	0	0	0	0	0	0	0	0	0	0	0	0
12010	B2m	0.07	0.12	0.37	0.21	0.2	0.16	0.07	0.45	0	0.03	0.2	0.62	0.05	0.21	0	0.4	0.43	0.6	0.61	0.57	0.72	0.93	0.97	0.97	1.74	1.96	1.6	2.84	2.78	3.56	2.65	4.92	2.78	2.88	3.41	2.16	3.14	3.38	4.37	3.73	2.73	3.86	1.98	3.28	2.67
26877	B3galt1	0	0	0	0	0	0	0	0	0	0	0	0	0	0	0	0	0	0	0	0	0	0	0	0	0	0	0	0	0	0	0	0	0	0.01	0.46	0.01	0	0	0	0	0	0	0.01	0	0
26878	B3galt2	0	0	0	0	0	0	0	0	0	0	0	0	0	0	0.1	0	0.01	0	0	0	0	0.08	0	0	0	0	0	0	0	0	0	0	0	0	0	0	0	0	0	0	0	0	0	0	0
93961	B3galt5	0	0	0	0	0	0	0	0	0	0	0	0	0	0	0	0	0	0	0	0	0	0	0	0	0	0	0	0	0	0	0.11	0	0	0	0	0	0.16	0	0	0	0	0	0	0	0
117592	B3galt6	0	0	0	0	0.03	0	0.02	0	0.01	0	0.01	0	0	0	0	0	0	0	0	0.04	0	0.01	0	0.23	0	0	0.01	0	0	0	0	0	0.06	0	0	0.01	0	0.01	0	0	0	0	0	0.01	0.01
72727	B3gat3	0	0	0	0	0	0	0	0	0	0	0	0	0	0	0	0	0	0	0	0	0	0	0	0	0	0	0.02	0	0.06	0	0	0.09	0.04	0.03	0	0	0	0.02	0.02	0	0.03	0	0.04	0.04	0.03
381694	B3glct	0.03	0	0.04	0.02	0.05	0.01	0.02	0.04	0.01	0.03	0.01	0.01	0.03	0.01	0.01	0.01	0.02	0.02	0	0.02	0	0	0.02	0.01	0.04	0.02	0	0	0	0.02	0	0	0.02	0	0	0.01	0	0	0	0	0	0	0	0.01	0
53625	B3gnt2	0	0	0	0	0	0	0.01	0	0	0	0	0	0	0	0	0	0	0	0	0	0	0	0	0	0	0	0.03	0	0	0	0	0	0	0	0	0	0	0	0	0	0	0	0	0	0
108105	B3gnt5	0	0	0	0	0	0	0	0	0	0	0	0	0	0	0	0	0	0	0	0	0	0	0	0	0	0	0.02	0	0	0	0	0	0	0	0	0	0	0	0	0	0	0	0	0	0
14421	B4galnt1	0	0	0.01	0	0	0.01	0.03	0.08	0.08	0.1	0	0.06	0	0	0.12	0.1	0.04	0.53	0.13	0.56	0	0.03	0.08	0.29	0.37	0.79	0.34	0.45	0.16	0.43	0.15	0.13	0.14	0.12	0.1	0.17	0.04	0.78	0.14	0.03	0.42	0	0.06	0.07	0.25
14595	B4galt1	0.04	0.06	0.06	0.08	0.07	0.03	0.04	0.31	0.11	0.21	0.1	0.13	0	0.05	0.24	0.08	0.01	0.15	0.08	0.12	0.13	0	0.13	0.06	0.19	0.14	0	0.09	0	0.15	0.06	0.14	0.07	0	0.03	0.06	0.03	0.06	0.03	0.03	0.08	0	0.02	0.01	0.04
218271	B4galt7	0	0	0	0.01	0	0	0	0	0	0	0	0	0	0	0	0	0	0	0	0	0	0	0	0	0.02	0	0	0	0	0.02	0	0	0.02	0	0	0	0	0	0	0	0	0	0.03	0	0
108902	B4gat1	0	0	0	0	0.01	0	0	0	0	0	0	0	0	0	0	0	0	0	0.12	0	0	0	0	0	0	0	0.03	0.33	0	0.01	0	0	0.05	0.04	0	0.08	0	0.12	0.52	0.02	0.03	0	0.02	0.12	0.05
12012	Baat	0	0	0	0	0	0	0	0	0	0	0	0	0	0	0.01	0	0	0.01	0.25	0.09	0.02	0.09	0.07	0.15	0.59	0.52	1.3	0.32	0.57	1.04	1.21	1.3	0.85	1.08	0.26	0.84	7.92	7.62	6.48	10.12	6.78	5.42	9.78	12.58	9.6
68251	Babam1	0.01	0.02	0.01	0.07	0.04	0.05	0.08	0.05	0.03	0.03	0.06	0.08	0.06	0.02	0	0.01	0	0.11	0.03	0.09	0	0.02	0.02	0.02	0.07	0.06	0.07	0	0.12	0.09	0.02	0.11	0.31	0.06	0.2	0.18	0.05	0.12	0.15	0.02	0.1	0.02	0.15	0.15	0.11
107976	Babam2	0.04	0.05	0.08	0.03	0.08	0	0.03	0.05	0.04	0.02	0.01	0.12	0.02	0.07	0.02	0.13	0.07	0.14	0.15	0.06	0.11	0.06	0.08	0.02	0.14	0.11	0.11	0.11	0.06	0.1	0.14	0.16	0.25	0.46	0.14	0.1	0.16	0.31	0.1	0.12	0.19	0	0.11	0.18	0.08
12013	Bach1	0	0	0	0	0	0	0	0	0	0	0	0	0	0	0.01	0	0	0.07	0	0	0.01	0	0	0	0	0	0	0	0	0	0	0	0	0	0	0	0	0	0	0	0	0	0	0	0
12015	Bad	0	0.07	0.04	0	0.02	0	0	0	0	0.01	0	0.01	0	0.03	0	0	0	0	0	0.01	0	0	0.08	0.02	0.28	0	0.03	0	0	0	0	0.02	0.03	0.02	0	0.08	0	0	0.03	0	0	0	0	0	0
12017	Bag1	0.21	0.13	0.75	0.24	0.29	0.2	0.06	0.25	0.18	0.14	0.04	0.3	0.23	0.01	0.33	0.12	0.16	1.21	0.19	0.08	0.15	0.35	0.33	0.39	0.47	0.46	1.03	0.38	1.16	0.68	0.42	0.46	1.14	0.36	0.32	0.54	0	1.14	0.47	0	0.06	0.03	0.22	0.08	0.53
213539	Bag2	1.4	0.9	2.55	1.5	0.64	1.08	0.86	0.7	0.6	0.86	1.89	0.4	0.57	1.96	0.28	0.63	0.55	0.26	0.61	1.36	0.24	0.51	0.64	0.12	0.54	0.28	0.11	0.19	0.11	0.02	0	0.02	0	0	0	0	0	0	0	0	0	0	0	0	0
29810	Bag3	0.04	0.05	0.01	0.04	0	0.01	0.16	0.02	0.02	0.02	0.09	0.06	0.04	0.03	0.02	0.05	0.17	0.04	0.17	0.07	0.05	0.14	0.38	0.63	0.18	1.27	0.29	0.17	0.05	1.38	0.31	0.39	0.67	0.2	1.11	0.35	0.76	2.26	3.35	0.28	0.73	0.33	0.81	3.79	2.45
67384	Bag4	0.02	0.02	0.16	0.04	0.03	0.07	0.06	0.08	0.05	0	0.02	0.05	0.01	0.06	0.08	0	0.04	0.05	0	0	0.07	0.01	0.01	0.02	0.02	0.07	0.02	0	0.01	0.1	0.01	0.03	0.05	0.04	0.01	0.02	0.01	0	0.02	0.01	0.01	0.01	0.04	0.02	0.01
70369	Bag5	0.06	0.05	0.07	0.03	0.1	0.06	0.04	0.09	0.02	0.05	0.12	0.03	0.05	0.03	0	0.06	0.03	0	0.09	0.08	0	0.05	0.06	0.07	0.21	0.19	0.19	0.11	0.05	0.31	0.17	0.31	0.16	0.14	0.11	0.13	0.14	0.08	0.12	0.2	0.18	0.15	0.11	0.05	0.06
224727	Bag6	0.64	0.73	1.47	0.77	0.74	0.93	0.57	0.67	0.84	0.39	0.72	0.55	0.6	0.53	0.42	0.38	0.47	0.65	0.4	0.68	0.58	0.27	0.36	0.27	0.53	0.61	0.41	0.48	0.38	0.34	2.34	0.78	0.48	0.5	0.45	0.33	0.3	0.26	0.26	0.14	0.18	0.16	0.28	0.22	0.08
228536	Bahd1	0	0	0	0	0	0.01	0	0	0	0	0	0	0	0.01	0	0	0	0	0	0	0	0	0	0	0	0	0	0	0	0	0	0	0	0	0	0	0	0	0	0	0	0	0	0	0
108100	Baiap2	0	0.04	0.01	0.04	0.01	0.42	0.02	0.04	1.24	0.07	0.02	0.05	0.02	0.01	0.04	0.04	0.59	1.44	0.14	0.12	0.08	0.12	1.56	0.31	0.15	0.57	0.44	0.11	0.31	0.07	0.21	0.42	0.23	0.43	0.15	0.59	0.4	0.57	0.35	0.25	0.18	0.26	0.22	0.37	0.36
66898	Baiap2l1	0.02	0.01	0.06	0	0.05	0.01	0.01	0.01	0.03	0.06	0.03	0	0.04	0.03	0.01	0.06	0.04	0.08	0.07	0.05	0.02	0.13	0.62	0.27	0.14	0.15	0.17	0.11	0.08	0.08	0.3	0.2	0.19	0.05	0.02	0.07	0.06	0.07	0.07	0.05	0.03	0.08	0.02	0.11	0.07
545192	Baiap3	0	0	0	0	0	0	0	0	0	0	0	0	0	0	0	0	0	0	0	0	0	0	0	0	0	0	0	0	0	0	0	0	0	0	0	0	0	0.01	0.02	0	0	0.01	0	0	0
12018	Bak1	0.08	0.06	0.14	0.12	0.07	0.08	0.2	0.55	0.58	0.16	0.09	0.64	0.03	0.71	1.15	0.35	0.06	1.86	0.07	0.12	0.05	0.33	0.33	0.68	1.61	2	0.68	0.26	1.18	2.7	0.32	0.15	0.41	0.16	0.46	0.43	0.05	0.28	1.35	0.15	0.17	0.3	0.11	0.78	0.04
23825	Banf1	8.74	5.72	12.11	5.65	2.35	35.05	4.52	3.24	3.98	1.12	4.12	14.41	1.81	5.72	11.46	1.78	1.94	3.81	3.78	3.61	1.37	1.45	4.52	1.02	3.08	2.75	0.69	2.43	1.23	1.04	3.49	1.66	0.88	1.33	1.24	1.75	0.09	1.89	0.72	0.79	7.32	0.69	0.64	0.29	0.68
242248	Bank1	0	0	0	0	0	0	0	0	0	0	0	0	0	0	0	0	0	0	0	0.02	0	0	0	0	0	0	0	0	0.01	0	0	0	0	0	0	0	0	0	0	0	0	0	0	0	0.03
53325	Banp	0.01	0.35	0	0.18	0.15	0.21	0	0.03	0.13	0	0	0	0	0.01	0	0	0.01	0	0	0	0	0	0	0.09	0	0	0.03	0	0	0	0	0	0	0	0	0	0	0	0	0	0	0	0	0	0
104416	Bap1	0	0	0	0	0	0	0	0	0	0	0	0	0	0	0	0	0	0	0	0.01	0	0	0	0	0	0	0	0	0	0	0	0	0	0	0	0	0	0	0	0	0	0	0	0	0
70350	Basp1	0.2	0.08	1.5	0.3	0.63	0.15	0.32	0.37	0.26	0.19	0.2	0	0.17	0.1	0.05	0.05	0.13	0.29	0.3	0.37	0.36	0.64	0.94	0.8	0.94	0.74	0.43	0.28	0.78	0.69	0.45	1.06	0.9	0.5	0.75	0.33	0.06	0.17	0.17	0.03	0.05	0.08	0.02	0.02	0.05
12028	Bax	1.54	1.19	2.22	1.76	1.11	1.17	1.01	1.89	1.57	0.81	1.32	0.99	0.96	1.23	0.33	0.63	1.12	0.91	0.77	0.52	0.68	1.08	1.88	2.59	2.04	2.47	1.5	0.9	1.43	3.24	1.08	2.9	0.83	0.58	0.6	0.18	1.09	1.37	1.61	1.04	0.49	0.22	0.42	0.89	0.62
217578	Baz1a	0.08	0.19	0.12	0.14	0.07	0.06	0.2	0.05	0.03	0.09	0.14	0.05	0.12	0.27	0.03	0.12	0.05	0.01	0.02	0.07	0	0.01	0.06	0.01	0.03	0.03	0.03	0.05	0.08	0	0.01	0.01	0.01	0	0	0	0	0	0	0	0	0	0	0	0
22385	Baz1b	0.13	0.31	0.23	0.65	0.06	0.06	0.29	0.08	0.09	0.09	0.19	0.07	0.2	0.33	0.08	0.12	0.08	0.09	0.14	0.12	0.09	0.03	0.11	0.1	0.07	0.12	0.11	0.03	0.11	0.06	0.08	0.16	0.11	0.08	0.07	0.03	0.04	0.04	0.02	0	0.05	0.02	0.02	0.02	0
116848	Baz2a	0.01	0.01	0	0.02	0.01	0.01	0.01	0.01	0.05	0	0.01	0	0	0	0	0	0	0	0	0	0	0	0	0	0	0	0	0	0	0	0	0	0	0	0	0	0	0	0	0	0	0	0	0	0
544881	BB287469	0.09	0.3	0.33	0.26	0.23	0.42	0.25	0.12	0.13	0.02	0.21	0.22	0.01	0.17	0.1	0.01	0.02	0.32	0.03	0.13	0.13	0.06	0.2	0.35	0.2	0.07	0.21	0.09	0.19	0.31	0.05	0.08	0.2	0.14	0.27	0.14	0.05	0.26	0.37	0.04	0.08	0.17	0.12	0.23	0.14
170442	Bbox1	0.01	0.01	0	0.02	0.01	0	0.07	0.04	0.12	0.41	0.09	0.18	0.08	0.13	0.17	0.2	0.5	0.66	0.48	0.45	0.68	0.8	1.52	2.72	11.95	3.59	3.15	4.54	4.97	3.85	5.88	7.42	5.86	6.29	5.67	7.18	7.67	6.19	6.37	4.88	5.66	3.29	2.74	21.99	4.81
102774	Bbs4	0.01	0	0	0	0	0	0	0	0	0.01	0	0	0	0	0	0	0	0	0	0	0	0	0.02	0	0	0	0	0	0	0	0	0	0	0.01	0	0	0	0	0	0	0.01	0.01	0	0	0
214489	BC003965	0	0	0.05	0	0	0	0	0	0	0	0	0	0	0	0	0	0	0	0	0	0	0	0	0	0	0	0.03	0	0	0	0	0	1.11	0	0	0	0	0	0	0	0	0	0	0	0
80748	BC004004	0	0	0.01	0	0	0	0	0	0	0	0	0	0	0	0.01	0	0	0.01	0.02	0.01	0.01	0	0	0.01	0	0	0.01	0.02	0	0	0	0	0.03	0	0	0.01	0	0.05	0.01	0	0	0	0	0.02	0.04
79555	BC005537	0	0.02	0	0	0	0	0	0	0	0.06	0.03	0	0	0	0	0	0	0	0.15	0	0	0.11	0	0	0.22	0	0	0	0	0	0.04	0	0	0	0	0	0	0	0	0	0	0	0	0	0
100042165	BC005561	0.01	0.01	0.03	0.02	0.02	0.01	0.04	0.02	0.01	0.01	0.01	0.03	0.01	0	0.02	0.01	0.01	0.03	0	0.01	0.01	0	0.01	0.01	0.03	0	0.02	0.02	0.01	0.04	0.04	0.01	0.02	0	0.02	0.01	0	0.02	0	0	0	0	0	0.18	0
227707	BC005624	0.11	0.19	3.18	0.08	0.15	0.36	0.05	0	0	0.06	0.04	0.45	0.13	0.21	0	0.1	0	0	0.03	0.19	0.03	0	0.2	0.03	0	0	0.01	0.07	0	0.17	0	0	0.31	0.12	0.08	0	0.16	0	0.33	0	0	0	0	0	0
233913	BC017158	0.44	0.6	0.16	0.12	0.1	0.11	0.18	0.16	0.18	0.12	0.22	0.04	0.17	0.11	0.47	0.16	0.27	0.3	0.57	0.54	0.31	0.26	0.31	0.11	0.05	0.34	0.08	0.33	0.1	0.06	0.13	0.37	0.33	0.25	1.54	0.05	0.23	0.11	0.33	1.17	0.24	0.06	0.19	0.08	0.32
407819	BC031181	0	0	0	0	0	0	0	0	0	0	0.01	0	0	0	0	0	0	0	0	0	0	0	0	0	0	0	0	0	0	0	0	0	0.09	0	0.28	0	0	0	0	0.18	0	0.14	0.12	0	0.03
207792	BC034090	0	0	0.02	0	0	0	0	0	0	0	0	0	0	0	0	0	0	0	0	0	0	0	0	0	0	0	0	0	0	0	0	0	0	0	0	0	0	0	0	0	0	0	0	0	0
232406	BC035044	0	0	0	0	0	0	0	0	0	0	0	0	0	0	0	0	0	0	0	0	0	0	0	0	0	0	0	0	0.12	0	0	0	0	0	0	0	0	0	0	0	0	0	0	0	0
270802	BC048403	0	0	0	0	0.03	0	0	0	0.02	0.05	0	0	0	0	0	0	0	0	0	0	0	0	0	0	0	0	0	0	0	0	0.05	0	0.02	0.03	0	0	0	0	0	0	0	0	0.03	0	0
408058	BC048507	0	0	0	0	0.01	0	0.01	0.03	0	0	0	0.01	0	0	0.02	0	0	0.04	0	0	0.03	0	0	0.01	0.02	0	0.02	0	0.04	0.03	0	0	0	0.08	0.02	0	0.11	0.14	0.11	0.03	0.04	0	0.08	0.04	0.08
399568	BC052040	0.04	0.08	0.03	0	0.04	0.02	0.01	0	0.01	0.04	0	0	0.04	0.01	0.03	0	0.01	0.02	0.01	0	0	0	0	0	0	0	0	0.02	0	0	0	0	0	0	0	0	0	0	0	0	0	0	0	0	0
381306	BC055324	0	0	0.01	0.02	0	0	0	0	0	0	0	0	0	0	0	0.55	0	0	0	0	0	0	0	0	0	0	0	0	0	0	0	0	0	0	0	0	0	0	0.01	0.69	0	0	0	0	0
57278	Bcam	0	0	0.08	0.06	0.11	0.02	0.04	0.07	0.12	0	0	0.18	0	0.01	0.07	0.06	0	0.07	0	0.12	0.19	0	0.04	0.06	0.01	0.01	0.01	0.02	0.18	0.21	0.15	0.14	0.22	0.01	0.05	0.24	0	0.03	0.06	0	0	0.03	0	0	0
12033	Bcap29	0.04	0.06	0.06	0.13	0.01	0.05	0.09	0.01	0	0	0.05	0.01	0	0.01	0	0	0.04	0.02	0.01	0.01	0.02	0.02	0.06	0	0.01	0.03	0.02	0	0	0.02	0.04	0.08	0.04	0	0.06	0.01	0	0	0.01	0	0	0.02	0.01	0	0
27061	Bcap31	0.75	1.06	1.67	0.91	1.61	0.82	1.12	1.81	1.39	0.49	1.19	1.45	0.64	0.81	1.39	0.55	0.81	3.47	1.09	2.62	3.29	0.79	1.82	3.25	1.92	2.37	3.4	2.81	7.59	6.16	1.92	7.13	5.75	3.39	12.1	11.14	3.52	4.94	9.56	1.28	2.71	11.39	9.28	8.72	8.67
12927	Bcar1	0	0	0	0	0.01	0	0	0.01	0	0	0	0	0	0	0	0	0	0	0	0	0	0.01	0.01	0	0.01	0.01	0	0.01	0	0.01	0	0.02	0.01	0.01	0	0.01	0	0	0	0	0	0	0.01	0.01	0.01
29815	Bcar3	0	0	0	0	0	0	0	0	0	0	0	0	0	0	0	0	0	0	0	0	0	0	0	0	0	0	0	0	0	0	0	0	0	0	0	0.05	0	0	0	0	0	0	0.01	0.02	0
76960	Bcas1	0	0	0.04	0.01	0.02	0	0.01	0.02	0.02	0	0.05	0.11	0.01	0.01	0.03	0	0.03	0.07	0	0	0	0	0	0	0	0	0	0	0	0	0	0	0	0	0	0	0	0	0	0	0	0	0	0	0
68183	Bcas2	1.77	1.93	5.11	0.98	2.52	1.59	1.46	2.91	2.61	1.1	0.61	2.38	1.45	0.87	0.69	0.93	1.08	0.63	0.42	0.81	0.18	0.58	1.29	0.61	3.42	0.85	0.47	0.62	0.38	1.46	1.96	0.55	2.03	0.69	0.83	0.37	0.81	0.27	0.09	0.01	0.28	0	0.04	1.16	0.18
192197	Bcas3	0.01	0.03	0.04	0.03	0.03	0.03	0.04	0.02	0.05	0.03	0.07	0.04	0.09	0	0.02	0.04	0.05	0.04	0.19	0.02	0.04	0.08	0.1	0.07	0.05	0.15	0.1	0.08	0.06	0.03	0.69	0.14	0.09	0.03	0.04	0.06	2.15	0.05	0.09	0.02	0.05	0	0.07	0.06	0.05
12036	Bcat2	0.78	0.59	0.93	0.66	0.9	0.96	0.54	0.73	0.84	0.41	0.57	0.81	0.59	0.45	0.54	0.41	0.48	0.65	0.44	0.65	0.51	0.34	0.28	0.29	0.51	0.42	0.69	0.33	0.31	0.84	0.19	0.19	0.36	0.09	0.07	0.1	0.03	0	0.03	0.01	0	0	0	0	0
66165	Bccip	0.73	0.21	1.12	0.39	0.6	0.64	0.33	0.65	0.49	0.2	0.45	0.37	0.19	0.28	0.14	0.26	0.56	0.48	0.23	0.18	0.28	0.06	0.35	0.49	0.72	0.23	0.22	0.18	0.33	0.32	0.54	0.54	0.27	0.16	0.18	0.35	0.28	0.39	0.26	0	0.15	0.06	0.23	0.02	0
12038	Bche	0.01	0.02	0.12	0.87	0.99	0.07	1.22	0.22	0.14	0.17	0.59	0.27	0.07	0.11	0.48	0.11	0.63	0.73	1.3	0.92	0.33	0.6	1.47	0.58	0.24	0.93	0.49	1.56	0.99	0.95	1.86	1.6	0.89	1.78	2.99	1.54	0.65	3.09	3.55	0.71	0.98	0.85	0.23	1.33	1.09
12039	Bckdha	0.06	0.03	0.07	0.1	0.08	0.23	0.15	0.5	0.32	0.69	0.6	0.51	0.68	0.14	0.65	0.99	1.27	3.02	1.39	3.44	2.07	2.92	4.26	2.71	7.74	6.2	4.04	8.04	6.22	6.69	12.81	9.83	7.35	18.77	16.71	13.93	10.46	12.22	12.71	5.72	8.09	6.16	5.01	4.76	5.56
12040	Bckdhb	0.09	0	0.1	0.1	0.17	0.41	0.42	0.26	0.13	0.43	0.71	0.32	0.51	0.33	1.7	0.45	0.53	2.89	1.25	2.8	1.22	3.51	5.48	3.33	8.32	13.53	10.17	14.18	9.42	12.27	16.58	25.54	19.86	39.57	24.84	26.49	23	21.98	21.45	12.24	20.71	16.41	7.64	8.89	11.8
12041	Bckdk	0.02	0.26	0.09	0.26	0.04	0.01	0.02	0	0	0.21	0.27	0.03	0.32	0.21	0	0.24	0	0.01	0.09	0	0.01	0.2	0	0	0	0	0	0.33	0	0	0.01	0	0.54	0.35	0.02	0.02	0	0.01	0.01	0	0	0	0.02	0.01	0
12042	Bcl10	1.02	0	0.89	0	0	0	0.71	0.73	0.05	0.31	0.81	0.83	1.17	0.75	0.57	0.92	0.89	0.09	1.58	0	0	0	2.29	1.45	0	0	2.05	0	0	1.17	4.49	0	0.05	0	0.03	0	2.53	0	0	0	0	0.12	0	0	0
14025	Bcl11a	0.08	0.31	0.12	0.09	0.07	0.02	0.13	0	0.04	0.01	0.02	0.03	0.11	0.02	0	0	0	0	0	0	0	0	0	0	0	0	0	0	0	0	0	0	0	0	0	0	0	0	0	0	0	0	0	0	0
12043	Bcl2	0	0	0	0	0	0	0	0	0	0	0	0	0.02	0	0	0	0	0	0	0	0	0	0	0	0	0	0	0	0	0	0	0	0	0	0	0	0	0	0	0	0	0	0	0	0
12048	Bcl2l1	0.18	0.57	0.53	0.35	0.22	0.49	0.48	0.32	0.35	0.04	0.23	0.11	0.31	0.45	0.13	0.08	0.12	0.36	0.27	0.29	0.22	0.29	0.62	0.23	0.03	0.08	0.07	0.51	0.17	0.66	0.24	0.28	0.19	0.08	0.18	0.35	0.1	0.4	0.12	0.05	0.28	0	0.06	0.09	0.04
12125	Bcl2l11	0	0	0	0	0	0	0	0	0	0	0	0	0	0	0	0	0	0	0	0	0	0	0	0	0	0	0.03	0.4	0	0	0	0	0	0	0	0	0	0	0	0	0	0	0	0	0
75736	Bcl2l12	0	0	0	0	0	0	0	0	0	0	0	0	0	0	0	0	0	0	0	0	0.02	0	0	0	0	0	0	0	0	0	0	0	0	0	0	0	0	0	0	0	0	0	0	0	0
94044	Bcl2l13	0.48	0.38	5.08	0.43	6.01	0.3	1.31	0.31	0.24	0.23	0.32	0.59	0.56	0.22	0.46	0.37	0.31	0.4	0.53	0.23	7.59	1.23	1.41	6.1	1.11	1.6	1.16	1.18	1.17	1.04	1.62	1.72	0.77	1.35	4.78	4.38	0.73	2.87	0.8	0.78	4.74	3.2	2.32	2.01	2.81
229672	Bcl2l15	0	0	0	0	0	0	0.03	0	0	0	0	0	0	0.02	0	0	0	0	0	0	0	0	0	0	0	0	0	0	0	0	0	0	0	0	0	0	0	0	0	0	0	0	0	0	0
12053	Bcl6	0	0	0	0	0	0	0	0	0	0	0	0	0	0	0	0	0	0	0	0	0	0	0	0	0.01	0	0	0	0	0	0	0	0	0	0	0	0	0	0	0	0	0	0	0	0
77045	Bcl7a	0.11	0.1	0.03	0	0	0	0	0.05	0	0.06	0.14	0.14	0.09	0.07	0.04	0	0	0.2	0	0	0	0.05	0	0.11	0.08	0	0.05	0	0	0	0	0	0	0	0.07	0	0.06	0	0.05	0	0	0	0	0	0
12054	Bcl7b	0.11	0.1	0.05	0	0	0	0	0.05	0	0.06	0.06	0.07	0.09	0.07	0.02	0	0	0.2	0	0	0	0.05	0	0.03	0.08	0	0.05	0	0	0	0	0	0	0	0.07	0	0.06	0	0.05	0	0	0	0	0	0
12055	Bcl7c	0.26	0.12	0.22	0.05	0	0.06	0.06	0.1	0.09	0.16	0.08	0.16	0.11	0.07	0.09	0.1	0	0.31	0.03	0	0.1	0.05	0.14	0.07	0.11	0.12	0.04	0	0	0	0	0.26	0.21	0.08	0.06	0.17	0.08	0.13	0.05	0	0	0	0.09	0.08	0
72567	Bclaf1	0.39	0.45	0.97	0.45	0.75	0.82	0.27	0.48	0.47	0.22	0.34	0.4	0.4	0.31	0.28	0.17	0.38	0.41	0.27	0.54	0.41	0.18	0.52	0.27	0.6	0.36	0.36	0.17	0.32	0.1	0.18	0.3	0.49	0.23	0.52	0.08	0.12	0.12	0.19	0.09	0.06	0.17	0.09	0.07	0.15
382252	Bclaf3	0	0	0	0	0	0	0	0	0	0	0	0	0	0	0	0	0	0	0	0	0	0	0	0	0	0	0	0	0	0	0	0	0	0	0	0	0	0	0	0	0.13	0	0	0	0
63857	Bco1	0	0.01	0	0	0.02	0.01	0	0.01	0.03	0.01	0.01	0	0.3	0.27	0.03	0.02	0	0.02	0	0	0.05	0.27	0.01	0.03	0.06	0.09	0.09	0.63	0.05	0.2	0.4	0.54	0.15	0.11	0.08	0.09	0	0.1	0.12	0	0	0	0	0.07	0.06
170752	Bco2	0	0	0	0	0	0	0	0	0	0	0	0	0	0	0	0	0	0	0	0	0	0	0	0	0	0	0	0	0	0	0	0	0	0	0.03	0.03	0	2.63	0	3.26	3.35	0.06	0.06	0.05	0.09
71458	Bcor	0	0	0	0	0	0	0.01	0	0	0	0.01	0	0	0	0	0	0	0	0	0	0	0	0	0	0	0	0	0	0	0	0	0	0	0	0	0	0	0	0	0	0	0	0	0	0
110279	Bcr	0	0	0	0	0	0	0	0	0	0	0.05	0.01	0.01	0.01	0.01	0	0	0	0.01	0.01	0.01	0	0	0.01	0	0	0.02	0	0	0.04	0	0.01	0.01	0	0	0.01	0	0.02	0.02	0	0.01	0.02	0.01	0	0
66821	Bcs1l	0.17	0.18	0.12	0.12	0.03	0.05	0.08	0.01	0.05	0.02	0	0.07	0.02	0.11	0.11	0.05	0.09	0.28	0.09	0.17	0.03	0	0.15	0.04	0.14	0.64	0.07	0.31	0.44	0.13	0.68	0.4	0.47	0.28	0.76	0.39	0.77	1.15	1.86	0.13	0.28	0.08	0.55	0.07	0.56
71911	Bdh1	2.38	1.99	1.75	3.78	3.85	2.69	6.04	8.91	8.44	7.36	8.52	9.54	9	5.44	17.54	14.54	11.45	27.08	18.74	23.74	18.64	26.88	28.22	29.29	123.78	119.32	85.73	160.6	189.4	306.37	281.22	361.81	322.51	562.71	370.53	589.42	261.32	240.12	221.93	91.82	98.75	64.01	40.85	40.44	42.64
69772	Bdh2	0	0	0	0	0	0	0	0	0	0	0	0	0	0	0	0	0	0	0	0	0	0	0	0	0	0	0	0	0	0	0	0	0	0	0	0	0	0	0	0	0	0	0.51	0.48	0.62
56208	Becn1	0.03	0.05	0.07	0.01	0	0	0.01	0.07	0	0.01	0.01	0.08	0.02	0.05	0	0.01	0.02	0.04	0.06	0.01	0	0.01	0.03	0	0.06	0.02	0.13	0.05	0.18	0	0	0.1	0.01	0	0.02	0	0.03	0	0	0	0	0	0.01	0.02	0.01
331623	Bend3	0.01	0.01	0	0	0	0	0	0	0	0.02	0	0	0	0.03	0	0	0	0	0	0	0	0	0	0	0.1	0	0	0	0	0	0	0	0	0	0	0	0	0	0	0	0	0	0	0	0
12068	Bet1	0	0	0.23	0.03	0.37	0.2	0.05	0.47	0.48	0.06	0	0.3	0	0.06	0.62	0.21	0.03	1.11	0	0.31	0.87	2.61	0.37	0.33	2.03	0.42	3.23	0.21	4.56	4.98	0	0.93	6.26	2.26	0.04	8.46	1.8	1.13	0.51	0.59	0.74	0.88	1.51	11.51	1.93
54399	Bet1l	0	0.03	0.11	0.02	0.03	0.01	0.04	0.12	0.05	0	0.03	0.04	0	0	0	0.04	0.01	0	0	0.02	0.07	0.02	0.04	0.04	0.44	0.27	0.1	0.07	0.21	0.08	0.12	0.27	0.33	0.17	0	0	0.11	0	0.12	0	0.09	0	0	0	0.06
19716	Bex1	0.6	0.65	0.25	0.21	1.82	0.22	0.24	1.25	1.45	0.26	0.47	0.88	0.52	0	0.13	0.25	0.24	0	0	0	0	0	0.34	0	0.14	0	0	0	0	0	0	0	0	0	0	0	0	0	0	0	0	0	0	0	0
12069	Bex2	0	0	0	0	0	0.04	0	0	0	0	0	0	0	0	0	0	0	0	0	0	0	0	0	0	0	0	0	0	0	0	0	0	0	0	0	0	0	0	0	0	0	0	0	0	0
406217	Bex4	0.01	0	0.03	0.02	0	0.07	0	0	0	0	0	0	0	0	0	0	0	0	0	0	0	0	0	0	0	0	0	0	0	0	0	0	0	0	0	0	0	0	0	0	0	0	0	0	0
67118	Bfar	0	0	0	0	0	0	0	0	0	0	0	0	0	0	0	0	0	0	0	0	0	0	0	0	0	0	0.1	0	0	0	0	6.45	0.02	0	0	0	0	0.05	0	0	0	0	0.01	0	0
107993	Bfsp2	0	0	0.2	0	0	0	0	0	0	0	0	0	0	0	0	0	0	0	0	0	0	0	0	0	0	0	0	0	0	0	0	0	0	0	0	0	0	0	0	0	0	0	0	0	0
12111	Bgn	0.02	0	0.1	0.09	0.04	0.08	0.14	0.17	0.13	0.08	0.1	0.75	0.02	0.05	0.19	0.19	1.7	0.25	0.64	0.39	0.22	0.4	0.33	0.66	0.99	0.98	0.86	1.07	0.89	0.77	0.85	0.99	1.35	1.42	0.82	1.68	0.32	1.04	0.67	0.37	0.33	0.61	0.27	0.73	0.45
59058	Bhlhe22	0	0	0	0	0	0	0.05	0	0	0	0	0	0	0	0	0	0.03	0	0	0	0	0	0	0	0	0	0	0	0	0	0	0	0	0	0	0	0	0	0	0	0.15	0	0	0	0
20893	Bhlhe40	0	0	0.01	0	0	0	0	0	0	0	0	0	0	0	0	0	0	0	0	0	0	0	0	0	0	0	0	0	0	0	0	0	0	0	0	0	0	0	0	0	0	0	0	0	0
79362	Bhlhe41	0	0	0.02	0	0	0	0	0	0	0	0	0	0	0	0	0	0	0	0	0	0	0	0	0	0	0	0	0	0	0	0	0	0	0	0	0	0	0	0	0	0	0	0	0	0
12116	Bhmt	0.46	0.63	1.65	1.57	1.88	1.11	3.71	13.48	9.11	6.25	6.88	16.53	5.13	4.23	27	11.66	17.67	75.45	68.78	66.42	54.27	198.78	300.32	339.18	526.88	708.68	518.68	646.28	1105.75	1308.95	1847.99	977.69	1350.15	1991.14	1773.97	1839.06	1031.8	1341.06	997.81	509.22	2115.98	1603.68	1024.43	1163.59	1290.26
64918	Bhmt2	0.01	0.07	0.13	0.2	0.06	0.13	0.37	3.32	1.81	1.75	1.1	2.65	0.99	0.27	4.61	4.1	5.07	16.71	28.18	20.43	12.8	60.08	76.69	69.3	129.8	166.7	111.27	195.77	184.38	320.25	462.69	207.28	255.05	303	458.86	426.1	175.1	230.48	220.34	146.81	376.32	374.06	189.12	168.6	193.33
12121	Bicd1	0	0	0.01	0.04	0	0	0.02	0	0.01	0	0	0	0	0	0	0	0	0	0	0	0.01	0	0	0	0	0	0	0	0	0	0	0	0	0	0	0	0	0	0	0	0	0	0	0	0
76895	Bicd2	0.07	0.02	0.12	0.11	0.02	0.02	0.01	0.09	0.05	0.09	0.03	0.01	0.03	0.01	0.07	0.05	0.1	0.01	0.05	0.02	0	0	0	0.03	0.14	0	0	0.06	0.02	0.03	0	0	0.03	0	0.01	0	0	0	0	0.82	0	0	0	0	0
243842	Bicra	0	0	0.03	0	0	0	0.04	0.01	0	0	0	0	0	0	0	0	0	0	0	0	0	0	0	0	0	0	0	0	0	0	0	0	0	0	0	0	0	0	0	0	0	0	0	0.01	0
210982	Bicral	0	0	0	0	0.03	0.04	0.02	0	0	0	0	0.01	0	0	0	0	0	0	0	0	0	0	0	0	0	0	0	0	0	0	0	0	0	0	0	0	0	0	0	0	0	0	0	0	0
12122	Bid	0.68	1.73	1.63	1.58	1.21	1.3	0.58	0.6	0.65	1.39	1.46	1.44	1.46	1.24	0.46	1.38	0.34	1.16	1.61	1.77	0.09	0.42	0.71	0.45	0.93	0.86	0.2	0.45	1.85	1.46	1.93	0.73	1.19	0.45	0.77	0	0.4	1.12	1.07	0	0.01	0.25	0.1	0.91	0.81
12124	Bik	0	0	0	0	0	0	0	0	0	0	0	0	0	0	0	0	0	0	0	0	0	0	0.03	0	0	0	0	0	0	0	0	0	0	0	0	0	0	0	0	0	0	0	0	0	0
30948	Bin1	0.14	0.14	4.79	0.45	2.32	0.17	0.5	2.11	0.16	0.13	0.14	2.41	0.1	0.06	1.15	0.11	0.15	1.4	0.18	0.24	0.17	0.39	0.72	1.67	0.12	0.99	0.88	0.5	0.17	0.23	0.59	0.31	1.16	0.06	0.06	0.09	0.54	0.07	0.02	0.02	0.06	0.05	0.05	0.06	0.03
668218	Bin2	0.24	0.36	5.83	0.26	2.88	0.24	0.31	2.4	0.19	0.2	0.19	2.84	0.43	0.58	1.1	0.36	0.23	1.35	0.7	1.15	0.48	0.41	0.57	1.72	0.3	0.22	0.96	0.36	0.11	0.47	0.44	0.39	0.59	0.07	0.04	0.03	0.01	0.05	0.11	0.01	0.03	0.01	0.07	0.02	0.04
57784	Bin3	0	0	0	0	0	0	0	0	0	0	0.01	0	0	0	0	0	0.01	0	0	0	0	0	0.02	0.01	0	0	0	0	0	0	0	0	0	0	0	0	0	0	0	0	0	0	0	0	0
11797	Birc2	0	0	0	0	0	0	0	0	0	0	0	0	0	0	0	0	0.01	0	0	0	0	0	0	0	0	0	0	0	0	0	0	0	0	0	0	0	0	0	0	0	0	0	0	0	0
11799	Birc5	0.65	0.49	0.55	0.4	0.3	0.53	0.36	0	0.1	0.45	0.08	0.12	0.2	0.09	0.06	0.13	0.04	0.4	0	0	0	0	0	0	0	0	0	0	0	0	0	0	0	0	0	0	0	0	0	0	0	0	0	0	0
12211	Birc6	0.08	0.09	0.18	0.07	0.11	0.05	0.08	0.05	0.04	0.05	0.05	0.13	0.06	0.05	0.07	0.08	0.04	0.13	0.04	0.04	0.02	0.02	0.03	0.03	0.06	0.04	0.04	0.03	0.07	0.04	0.04	0.03	0.05	0.04	0.08	0.02	0.03	0.03	0.03	0.03	0.01	0.01	0.02	0.03	0.06
12143	Blk	0.05	0.05	0.04	0.06	0.02	0.03	0.05	0.02	0.02	0.05	0.04	0.02	0.09	0.08	0.01	0.03	0.05	0.03	0.02	0.02	0	0	0.03	0	0.02	0	0.03	0.05	0.02	0	0	0	0.03	0	0	0.01	0	0.01	0.01	0	0.05	0	0.01	0.09	0
12144	Blm	0.01	0.01	0.08	0	0.04	0.01	0.01	0	0	0.02	0.01	0.52	0.01	0.01	0	0.15	0.01	0	0	0	0	0	0	0	0	0	0	0	0	0	0	0	0	0	0	0	0	0	0	0	0	0	0	0	0
104184	Blmh	2.02	1.82	1.78	1	4.67	4.3	0.98	3.95	3.57	5.66	1.71	2.15	1.65	2.35	3.26	4.04	5.17	1.51	0.78	1.55	29.35	0.96	1.84	1.1	2.91	1.22	2.2	3.85	2.48	3.43	1.68	2.43	2.79	3.34	4.64	22.52	1.38	3.54	24	0.84	1.59	17.09	1.71	1.46	1.26
17060	Blnk	1.71	0.8	1.41	4.13	0	0	1.12	0.68	0.45	0	1.16	0	0	1.6	0	1.38	0.94	0	0	0	0	0.6	0	0	0	0	0	0	0	1.25	0	0	0.77	0	0	0	0	0	0	0	0	0	0	0	0
14533	Bloc1s1	0.1	0	0.31	0.03	0.06	0.02	0.01	0.03	0.1	0.07	0.07	0.23	0.07	0.07	0.17	0.04	0.14	0.18	0.02	0	0.21	0	0	0	0.43	0	0.06	0	0.26	0.05	0	0	0	0	0.05	0.26	0	0.04	0	0.03	0	0	0.01	0.05	0.09
73689	Bloc1s2	0.02	0.01	0.91	0.01	0.58	0.4	0.18	0.04	0.22	0	0.01	0.27	0.02	0.1	0	0.13	0.14	0.25	0	0.26	0.24	0.03	0.29	0	0.26	0.3	0.11	0.04	0.2	1.51	0.27	0.49	0.46	0.45	0.38	0.6	0.24	0	0	0.35	0	0.29	0	1.11	0.34
232946	Bloc1s3	0.17	0	0.03	0	0	0	0	0	0.14	0.23	0.01	3.33	0.04	3.11	0.07	0.29	0	3.57	0	0.09	0	0	0	0.12	0.03	0.04	0.17	0	0.11	0.12	0.39	0.11	0.14	0.09	0.24	0.01	0.02	0.01	0	0	0	1.04	0.21	0.09	0.06
117197	Bloc1s4	0.06	0.01	0.02	0.09	0.01	0.03	0	0.01	0.02	0	0.01	0.02	0.02	0.07	0.01	0	0.01	0.03	0	0.02	0.02	0.07	0.02	0.04	0	0	0.02	0.02	0.09	0.09	0.07	0.18	0	0.02	0.05	0.06	0.03	0.01	0.03	0.04	0.02	0	0.03	0.08	0.09
17828	Bloc1s5	0.05	0.06	0.01	0.02	0.06	0.04	0.01	0.11	0.02	0.03	0.11	0.03	0.23	0.03	0.01	0	0.01	0.07	0.04	0.02	0	0	0.04	0	0.24	0.01	0.06	0.04	0.01	0.16	0.1	0	0.07	0	0.4	0.02	0.27	0.09	0.01	0.1	0.01	0.48	0.05	0.02	0.03
18457	Bloc1s6	0.04	0.02	0	0	0	0	0	0	0	0.06	0.01	0	0.01	0.03	0	0.04	0.01	0	0.05	0	0	0	0.05	0	0.13	0.03	0.02	0.1	0.04	0	0.01	0.11	0.13	0.09	0.02	0	0.16	0.03	0	0.11	0	0	0.02	0.03	0
109778	Blvra	2.21	1.21	2.48	2.31	2.3	1.89	1.95	2.31	2.58	2.69	1.74	3.16	2.21	1.39	2.5	1.92	2.31	2.69	2.04	2.21	2.45	2.34	3.18	2.45	3.8	4.33	2.56	4.98	3.31	3.95	3.27	9.61	5.16	4.61	4.32	4.05	3.84	3.18	2.94	2.28	2.11	1.83	1.62	2.41	1.51
233016	Blvrb	46.75	37.31	84.57	39.97	69.12	61.82	52.68	71.64	80.74	48.28	43.66	75.5	69.16	40.42	83.56	29.51	45.48	55.91	23.32	34.86	28.74	33.58	29.65	30.11	27.28	43.33	41.41	39.84	46.06	63.05	48.57	65.59	65.16	51.61	44.71	56.89	42.07	41.11	42.87	29.68	29.78	27.05	49.93	43.5	44.67
66352	Blzf1	0	0	0	0	0	0.09	0	0.09	0	0	0	0	0	0	0	0	0	0	0	0	0	0	0	0	0	0	0.13	0	0	0.05	0	0	0	0	0	0	0	0	0	0	0	0	0	0	0
12151	Bmi1	0	0	0	0	0	0	0	0	0	0	0	0	0	0	0	0	0	0	0	0	0	0	0	0	0	0	0.01	0	0	0	0	0	0	0	0	0	0	0	0	0	0	0	0	0	0
12153	Bmp1	0	0	0	0	0	0	0	0	0	0	0	0	0	0	0	0	0	0	0	0	0	0	0	0	0	0	0	0	0.01	0.08	0	0	0.08	0	0	0	0	0	0	0	0	0	0	0.04	0.04
140780	Bmp2k	0.07	0.16	0.08	0.13	0.15	0.13	0.05	0.03	0.06	0.03	0.07	0.04	0.08	0.07	0.04	0.02	0.05	0.06	0.04	0.01	0.01	0.01	0.06	0.55	0.05	0.02	0.01	0.04	0.01	0.14	0.01	0	0.15	0.01	0.08	0.02	0	0	0	0.03	0	0	0	0	0.04
12164	Bmp8b	0	0	0	0	0	0	0	0	0	0	0	0	0	0	0	0	0	0	0	0	0	0	6.84	0	0	2.35	0	0	0	0	0	0	0	0	0	0	0	0	0	0	0	0	0	0	0
12168	Bmpr2	0	0	0	0	0	0	0	0	0	0	0	0	0	0	0	0	0	0	0	0	0	0	0	0	0	0	0.01	0	0	0	0	0	0	0	0	0	0	0	0	0	0	0	0	0	0
213895	Bms1	0.07	0.17	0.04	0.15	0.08	0.17	0.11	0.04	0.04	0.03	0.06	0.05	0.04	0.04	0	0.02	0.01	0	0	0	0.04	0	0.14	0.01	0.03	0.02	0.03	0	0.01	0.03	0	0	0.24	0	0	0.02	0.28	0	0	0	0.01	0	0	0	0
12169	Bmx	0.02	0	0	0	0	0	0	0	0	0	0	0	0	0	0	0	0	0	0	0	0	0	0	0	0	0	0	0	0	0.02	0	0	0	0	0	0	0	0	0	0	0	0	0	0	0
224630	Bnip1	0.12	0.13	0.99	0.75	1.11	0.55	0.74	0.42	0.42	0.33	0.62	0.06	0.32	0.43	0.09	0.21	0.06	0.16	0.16	1.43	0.03	0.03	0.05	1.31	0.69	1.46	0.42	4.8	0.52	1.21	0.57	0.74	0.41	0.79	0.8	0.52	0.34	0.82	0.78	0.64	1.26	0.5	0.61	0.92	0.63
12175	Bnip2	0.03	0	0.06	0	0.03	0	0	0.02	0.02	0.01	0.02	0	0.02	0	0.01	0.02	0.02	0.02	0	0.02	0	0	0	0	0	0	0	0.04	0	0	0.04	0	0.05	0.02	0	0	0.04	0	0	0.07	0	0	0.02	0.02	0.02
12176	Bnip3	0	0	0	0	0	0	0	0	0	0.05	0	0	0.01	0	0	0.05	0	0	0.2	0.11	0.09	0.1	0	0.08	0.14	0	0.33	0.15	0.13	0.43	0.63	0.03	0.15	0	0.22	0.09	0	0.11	0.09	0.06	0.54	0.29	0.14	0.03	0.24
12177	Bnip3l	0	0.02	0.01	0	0.01	0.01	0	0.01	0.03	0.03	0	0.03	0.01	0	0	0.03	0.01	0	0.01	0.04	0.01	0	0	0.02	0.05	0	0.04	0.01	0	0.01	0	0	0.02	0	0	0	0	0	0	0	0	0	0	0.01	0.01
69556	Bod1	0.05	0.04	0.04	0	0.02	0.09	0	0.05	0.04	0	0.04	0.11	0.04	0	0.01	0	0	0.06	0	0	0.02	0	0	0.03	0.05	0	0.07	0	0	0.03	0	0	0.11	0	0	0	0.01	0.03	0	0	0	0	0	0	0
665775	Bod1l	0.04	0.02	0.15	0.01	0.11	0.02	0.01	0.02	0.21	0.08	0.01	0.02	0.01	0.1	0	0	0	0	0	0	0.01	0	0	0.33	0	0	0	0	0	0	0	0	0	0	0.03	0	0	0	0	0	0	0	0	0	0
51800	Bok	0	0	0	0	0	0	0	0	0	0	0	0	0	0	0	0	0	0	0	0	0	0	0	0	2.83	0	0	0	0	0	0	0	0	0	0	0	0	0	0	0	0	0	0.01	0	0
69168	Bola1	3.05	1.06	4.46	2.81	4.83	4.21	5.8	2.2	1.14	2.34	1.95	3.89	0.85	0.63	0.88	4.47	1.48	4.78	0.88	1.16	0.86	1.32	5.11	2.38	4.71	3.67	6.15	2.68	1.2	2.58	21.67	4	3.05	8.32	2.2	23.66	22.21	15	2.44	2.8	1.08	1.81	3.75	7.35	2.06
66162	Bola2	1.78	1.92	5.86	1.87	3.23	3.72	1.7	3.38	3.63	1.66	1.34	1.32	1.89	2.05	3.7	1.59	0.74	2.9	4.47	2.6	1.99	1.36	1.56	2.63	3.37	2.35	4.82	2.31	0.97	2.26	0.7	2.29	1.99	1.26	0.75	1.37	0.17	2	1.11	0.43	1.02	0.34	0.83	0.95	0.8
78653	Bola3	0.15	0.02	0.2	0.1	0.69	0.25	0.27	0.18	0.13	0.15	0.07	0.24	0.04	0.08	0.07	0.14	0.17	0.17	0.13	0.17	0	0.13	0.27	0.18	0.06	0.53	0.18	0.34	0.41	0.45	0.09	0.2	0.81	0.69	0.68	0.57	0	0.46	0.64	0	0.96	0.94	0.31	0.3	0.66
12181	Bop1	0.61	0.33	0.66	0.39	1.05	0.81	0.49	0.37	0.27	0.16	0.22	0.12	0.48	0.3	0.13	0.2	0.22	0.09	0.35	0.17	0.11	0.04	0.29	0.16	0.2	0.24	0.09	0.05	0.04	0.06	0.08	0.01	0	0.02	0.09	0.22	0.03	0.01	0.05	0.01	0	0.03	0	0.71	0
67774	Borcs5	0	0	0.21	0	0.01	0.04	0	0.07	0.03	0.01	0.01	0.01	0.09	0	0.02	0	0	0.02	0	0	0.18	0	0	0	0	0	0.23	0	0	0.01	0	0	0.01	0	0	0.02	0	0	0	0	0	0	0.26	0.03	0.01
71923	Borcs6	0	0	0.01	0.02	0	0	0	0.01	0	0	0.02	0	0	0	0	0.01	0	0	0.02	0	0.01	0	0	0.01	0	0	0.12	0	0	0.03	0	0.02	0.19	0	0	0	0	0.02	0.45	0	0	0	0.08	0.02	0
66439	Borcs7	0	0	0.06	0	0.03	0	0.11	0	0	0.13	0	0.24	0	0.16	0	0.24	0	0	0	0	0	0	0	0.02	0	0	0.06	0	0	0.04	0	0	0	0	0	0.04	0	0.04	0.06	0	0	0	0	0.04	0.03
72368	Borcs8	0	0.01	0	0	0	0	0	0	0	0	0	0	0	0	0	0	0	0	0	0	0	0	0	0	0	0	0	0	0	0.15	0	0	0	0	0	0	0	0	0	0	0	0	0.02	0	0
12183	Bpgm	0.32	0.8	0.6	0.37	0.65	0.93	0.6	0.79	0.95	0.56	0.93	1.28	0.68	0.78	0.9	0.57	1.01	1.14	1.59	2.7	1.41	1.56	1.42	1.79	0.6	0.67	0.76	0.81	0.72	0.65	0.48	0.88	0.54	0.44	0.77	0.51	0.2	0.53	0.55	0.4	4.96	1.02	0.86	1	0.81
68021	Bphl	0.24	0.2	0.41	0.49	0.42	0.27	0.49	1.78	1.47	0.75	1	1.54	1.1	1.02	2.84	1.92	2.67	6.27	4.53	4.83	4.16	4.48	4.93	3.06	12.84	11.09	8.7	13.07	10.45	19.69	26.83	19.78	20.34	50.04	28.52	32.52	38.73	39.86	37.97	44.78	50.2	20.35	24.09	38.68	39.08
18843	Bpifa1	0	0	0	0	0	0	0	0	0	0	0	0	0	0	0	0	0	0	0	0	0	0	0	0	0	0	0	0	0	0	0	0	0	0	0	0	0	1.83	0	0	0	0	0	0	0
73388	Bpifa3	0	0	0.02	0.07	0.03	0.03	0.03	0.04	0	0.03	0	0.03	0	0	0.03	0	0	0	0	0.02	0.05	0	0.07	0.03	0.13	0.09	0.05	0.11	0.11	0.08	0.21	0.12	0.11	0.15	0.19	0.14	0.12	0.1	0.1	0.08	0.01	0.04	0.07	0.05	0.06
228796	Bpifb6	0.11	0	0	0	0.04	0	0.14	0	0.02	0.15	0	0.06	0	0	0	0.01	0	0	0	0	0.05	0	0	0.05	0.02	0.28	0	0	0	0.06	0.1	0	0	0	0	0	0	0	0	0.21	0.22	0	0	0	0.05
270757	Bpifc	0	0	0	0	0	0	0	0	0	0	0	0	0	0	0	0	0	0	0	0	0	0	0	0.05	0.07	0	0.01	0	0	0	0	1.27	0.24	1.57	0	0.29	0	0	0	0	0.17	0	0.12	0	0.08
23827	Bpnt1	0.24	0.26	0.35	0.26	0.46	0.28	0.31	0.6	0.52	0.41	0.21	0.56	0.38	0.25	0.73	0.39	0.46	1.53	1.14	1.28	1.01	1.68	1.32	1.24	3.79	3	2.16	1.93	2.21	2.75	4.28	4.39	2.16	4.27	3.97	2.63	5.4	7.45	4.82	8.88	8.67	5.09	5.34	6.8	5.92
207165	Bptf	0	0	0.01	0	0.05	0.01	0	0	0	0	0	0	0	0	0	0	0	0	0	0	0	0	0	0	0	0	0.01	0	0	0	0	0	0	0	0	0	0	0	0	0	0	0	0	0	0
109880	Braf	0	0	0.09	0.01	0.02	0	0.01	0.03	0.03	0.01	0.05	0.03	0	0.05	0.04	0.01	0.01	0.04	0.02	0.03	0	0.03	0.05	0.02	0.01	0.08	0.04	0.01	0.05	0.03	0	0.01	0	0	0.11	0	0.01	0	0	0.03	0.02	0.05	0	0	0
72399	Brap	0.02	0.02	0.06	0	0.16	0.01	0.03	0.07	0.01	0	0.03	0.01	0.08	0.01	0	0.01	0.02	0.07	0.01	0.09	0.03	0	0.04	0.55	0.06	0.08	0.13	0.07	0.11	0.14	0.02	0.02	0.08	0.06	0.09	0.03	0.04	0.26	0	0.02	0.02	0.01	0.03	0.04	0.15
231841	Brat1	0.08	0.04	0.04	0.04	0.04	0.02	0.02	0.02	0.01	0.04	0.04	0.02	0.03	0.02	0.01	0.03	0	0.02	0	0	0.02	0	0.01	0.01	0	0	0.01	0.01	0	0	0	0.02	0.09	0	0.01	0	0	0.01	0	0	0	0	0.01	0	0
12189	Brca1	0.01	0.01	0	0	0.01	0.03	0.02	0	0.01	0.04	0	0.01	0.01	0	0	0	0	0	0	0	0	0	0	0	0	0	0	0	0	0	0	0	0	0	0	0	0	0	0	0	0	0	0	0	0
12190	Brca2	0	0	0	0	0	0	0	0	0	0	0	0	0	0	0	0	0	0	0	0	0	0	0	0	0	0	0	0	0	0	0	0	0	0	0	0	0	0	0	0.01	0	0	0	0	0
210766	Brcc3	0.36	0.19	0.72	0.22	0.23	0.43	0.11	0.31	0.33	0.25	0.16	0.31	0.22	0.17	0.16	0.07	0.23	0.25	0.34	0.23	0.32	0.26	0.27	0.39	0.74	0.44	0.22	0.32	0.4	0.33	0.38	0.47	0.49	0.53	0.46	0.55	0.66	0.5	0.55	0.44	0.17	0.3	0.3	0.43	0.98
223770	Brd1	0	0	0	0	0	0	0	0	0	0	0	0.01	0	0	0	0	0	0	0	0	0	0	0	0	0	0	0	0	0	0	0.27	0	0	0	0.01	0	0	0	0	0	0	0	0	0	0
14312	Brd2	0.06	0.07	0.22	0.16	0.07	0.23	0.15	0.08	0.13	0.04	0.07	0.19	0.11	0.1	0.1	0.05	0.04	0.1	0.02	0.01	0.13	0.03	0.02	0.05	0.01	0.01	0.21	0.02	0.11	0.02	0.06	0.08	0.1	0.07	0.12	0.01	0.01	0.06	0.04	0.01	0	0	0.03	0.02	0.04
67382	Brd3	0.22	0.34	0.22	0.17	0.11	0.4	1	0.12	0.1	0.25	0.15	0.21	0.06	0.1	0.11	0.14	0.07	0.24	0.11	0.06	0.05	0.05	0.14	0.16	0.07	0.16	0.52	0.06	0.1	0.13	0.03	0.08	0.17	0.09	0.06	0.14	0.06	0.12	0.04	0.11	0	0.01	0.02	0.05	0.03
57261	Brd4	0.04	0.1	0.26	0.11	0.3	0.18	0.08	0.06	0.06	0.16	0.09	0.13	0.07	0.07	0.12	0.06	0.02	0.24	0.12	0.1	0.18	0.01	0.08	0.08	0.01	0.09	0.18	0.04	0.3	0.06	0.01	0.07	0.17	0.05	0.03	0.07	0.04	0.06	0.06	0	0	0.23	0.02	0.04	0.03
26992	Brd7	0.17	0.2	0.2	0.18	0.04	0.19	0.24	0.02	0.04	0.06	0.02	0.02	0.02	0	0.01	0.01	0.1	0.03	0.01	0	0	0.03	0.03	0.01	0.03	0	0.01	0.05	0	0	0.02	0	0	0	0	0	0	0.04	0	0.06	0	0	0	0.05	0
78656	Brd8	0.03	0.01	0.01	0.05	0.03	0.02	0.02	0.03	0	0.01	0.02	0.02	0.03	0.02	0.02	0	0	0	0	0	0	0	0.01	0	0	0	0	0	0	0	0	0	0	0	0	0	0	0	0	0	0	0	0	0	0
105246	Brd9	0.03	0.02	0.01	0.01	0.02	0.01	0.01	0.01	0.01	0	0	0	0	0	0	0.01	0	0	0	0	0	0	0	0	0	0	0	0	0	0	0	0	0	0	0	0	0	0	0	0	0	0	0	0	0
114642	Brdt	0.02	0.02	0.03	0	0.02	0.03	0	0.01	0.01	0.01	0	0.01	0.02	0	0.01	0	0	0.01	0.03	0	0	0	0	0.02	0	0	0.01	0	0.02	0.02	0	0	0.02	0	0.02	0.03	0	0.03	0.01	0	0	0	0	0.01	0
72308	Brf1	0.01	0	0.74	0.01	0.02	0.03	0.02	0.1	0.07	0	0	0.01	0	0	0	0	0	0	0	0	0	0	0	0	0	0	0	0	0	0	0	0	0	0	0	0	0	0	0	0	0	0	0	0	0
66653	Brf2	0	0	0	0	0	0	0	0	0	0	0	0	0	0	0	0	0	0	0	0	0	0	0	0	0	0	0	0	0	0	0	0	0	0	0	0	0	0	0	0	0	0.06	0	0	0
76809	Bri3bp	0.12	0.62	0.82	0.31	0.58	0.21	0.43	0.8	0.77	0.1	0.46	0.67	0.14	0.27	0.1	0.13	0.04	0.68	0.29	0.16	0.27	0.28	0.68	0.43	0.32	0.25	1.12	0.52	0.48	0.27	0.12	0.24	0.81	0.48	0.31	1.21	0.41	0.96	0.54	0.4	0.37	0.71	0.94	0.59	1.15
67832	Brix1	0.05	0.62	0.01	0.37	0.09	0.15	0.18	0.05	0.1	0.01	0.1	0.03	0.06	0.18	0.04	0.02	0.01	0.08	0.02	0	0.04	0.02	0.13	0.03	0.19	0.03	0.05	0.02	0	0.04	0.04	0	0.03	0	0	0.01	0.02	0.07	0.02	0.01	0.01	0	0.01	0.01	0.01
101314	Brk1	0.36	0.3	0.56	0.11	0.26	0.34	0.16	3.05	0.39	0.06	0.58	0.56	0.84	0.46	0.34	0.01	0.42	0.59	1.14	0.96	0.48	1.13	1.98	0.14	0.26	0.22	0.53	0.87	0.53	0.39	0.37	3.3	0.31	3.39	0.75	0.33	0.46	0.15	0.16	0	0	0.39	0.29	0.15	0.15
107392	Brms1	0	0	0.02	0.01	0.01	0	0	0	0	0	0	0.01	0	0.02	0	0	0	0	0	0.01	0	0	0	0	0	0	0	0	0	0	0	0	0	0	0	0	0	0	0	0	0	0	0	0	0
52592	Brms1l	0.01	0.01	0.01	0	0	0	0	0.01	0.01	0	0.01	0	0	0	0	0	0	0	0	0	0	0.01	0	0	0	0	0	0	0	0	0	0	0	0	0	0	0	0	0	0	0	0	0	0	0
71678	Brox	0.05	0.05	0.14	0.07	0.07	0.07	0.07	0.08	0.06	0.07	0.02	0.08	0	0.07	0.04	0.13	0.08	0.06	0	0	0.1	0.01	0.09	0.12	0.1	0.11	0.12	0	0.2	0.13	0.04	0.11	0.2	0.19	0.02	0.13	0	0.07	0.12	0.04	0.03	0.05	0.05	0.12	0.07
78783	Brpf1	0	0	0	0	0.01	0.02	0	0	0.01	0	0	0	0	0	0	0	0	0	0	0	0	0	0	0	0	0	0	0	0	0	0	0	0	0	0	0	0.01	0	0	0	0.01	0	0	0	0
268936	Brpf3	0	0	0	0	0.01	0.01	0.01	0	0	0.01	0	0	0	0	0	0	0	0	0	0	0	0	0	0	0	0	0	0	0	0	0	0	0	0	0.02	0	0	0	0	0	0	0	0	0	0
381979	Brsk1	0	0	0	0	0	0	0	0.01	0.02	0.01	0	0	0	0	0	0	0.02	0	0	0	0	0	0	0	0	0.01	0	0	0	0	0	0	0	0	0	0	0	0	0	0	0	0	0	0	0
93871	Brwd1	0.01	0	0	0	0	0	0	0	0	0	0	0	0	0	0	0	0	0	0	0	0	0	0	0	0	0	0	0	0	0	0	0	0	0	0	0	0	0	0	0	0	0	0	0	0
382236	Brwd3	0	0	0	0	0	0	0.01	0	0	0.01	0	0	0	0	0	0	0	0	0	0	0	0	0	0	0	0	0	0.04	0	0	0	0	0	0	0	0	0	0	0	0	0.01	0	0	0	0
14705	Bscl2	0	0	0	0	0	0	0	0	0	0	0	0	0	0	0.09	0	0	0	0	0	0	0	0	0	0	0	0	0	0	0.06	0.01	0	0.02	0	0	0.04	0	0	0.11	0	0	0	0.06	0.05	0.05
100383	Bsdc1	0.11	0.15	0.16	0.14	0.19	0.38	0.31	1.21	0.43	0.07	0.14	0.24	0.16	0.15	0.09	0.14	0.13	0.15	0.11	0.09	0.04	0.05	0.45	0.35	0.17	0.1	0.1	0.1	0.01	0.15	0.14	0.01	0.27	0.09	0.02	0.04	0.1	0.13	0.06	0.08	0.02	0.67	0.17	0.11	0.07
12215	Bsg	5.89	8.89	9.4	5.71	7.9	6.22	5.58	6.51	6.26	5.26	4.88	6.94	9.58	5.08	6.46	7.08	5.72	12.13	13.41	15.53	12.81	16.68	13.24	11.49	24.88	12.05	9.62	20.65	27.05	25.89	22.72	22.09	24.5	24.89	44.38	32.04	13.57	10.29	10.11	11.88	9.75	13.11	4.73	3.49	5.81
12217	Bsn	0	0	0	0	0	0	0	0	0	0	0	0	0	0	0	0	0	0	0	0	0	0	0	0	0	0	0	0	0.01	0	0	0	0	0	0	0	0	0	0	0	0	0	0	0	0
12182	Bst1	0	0	0	0	0	0	0	0.07	0	0	0	0	0	0	0	0	0	0.01	0	0	0	0	0	0	0	0	0	0	0	0	0	0	0	0	0	0	0	0	0	0	0	0	0	0	0
69550	Bst2	0	0	4.45	0	2.31	0	0	0	0.14	0	0	0.24	0	0	2.47	0	0	4.35	0	0.7	0.37	0	0.2	0	0.8	0	0.03	1.23	1.22	0.51	1.39	0.49	0.23	0.61	1.82	0.22	0.76	0.3	0	0.71	0.99	0.68	0.46	0.36	0.37
107182	Btaf1	0.33	0.28	0.2	0.53	0.44	0.18	0.12	0.1	0.05	0.11	0.08	0.1	0.08	0.21	0.08	0.08	0.04	0.06	0.02	0.04	0.04	0.02	0.44	0.02	0.01	0.2	0.02	0.11	0.19	0.04	0.01	0	0.03	0.01	0.01	0.03	0.01	0	0	0.04	0	0	0	0	0
68815	Btbd10	0	0	0	0	0	0	0	0	0	0	0	0	0	0	0	0	0	0	0	0	0	0	0	0	0.02	0	0	0	0	0	0	0	0	0	0	0	0	0	0	0	0	0	0	0	0
208198	Btbd2	0	0	0	0	0	0.09	0	0	0	0	0	0	0	0	0	0	0	0	0	0	0	0	0	0	0	0	0	0	0	0	0	0	0	0	0	0	0	0	0	0	0	0	0	0	0
224671	Btbd9	0	0	0	0	0	0	0	0	0	0	0	0	0	0	0	0	0	0	0	0	0	0	0	0	0	0	0	0	0	0	0.01	0	0	0	0	0	0	0	0	0	0	0	0	0	0
26363	Btd	0.02	0	0	0.03	0	0	0	0.03	0.01	0	0.02	0.02	0.01	0.01	0.04	0.02	0.01	0.02	0.25	0.64	0.08	0.05	0.03	0.11	0.03	0.07	0.05	0.05	0	0.09	0.03	0.07	0.08	0.06	0.16	0.16	0.23	0.25	0.2	0.58	0.15	0.02	0.17	0.19	0.32
218490	Btf3	2.77	4.02	11.08	3.46	5.25	4.36	2.51	8.08	9.02	2.05	1.81	12.28	1.82	1.58	12.94	1.01	1.48	3.8	0.99	1.77	13.82	0.84	2.32	1.96	2.49	2.22	1.1	0	2.21	2.01	0.03	0.49	1.69	0.93	0.23	0.76	0.73	1.86	2.2	0.63	0.02	0.12	1.33	0.53	0.7
70533	Btf3l4	1.35	0.85	3.78	1.82	1.44	0.96	0.83	1.84	1.16	0.72	0.62	1.31	0.65	0.81	1.66	1.67	0.96	0.95	1.41	0.97	1.34	1.45	2.9	3.51	3.75	3.02	2.09	4.52	3.05	4.93	5.26	7.04	2.78	5.33	2.45	5.7	6.22	2.94	7.93	14.29	3.14	2.75	3.78	3.21	5.11
12229	Btk	0.12	0.29	0.46	0.15	0.27	0.22	0.12	0.07	0.07	0.04	0.08	0.07	0.08	0.12	0.05	0.04	0.04	0.07	0.34	0.06	0.03	0.01	0.03	0.02	0.09	0.02	0.05	0.1	0.04	0.02	0.01	0	0.04	0	0	0	0	0	0	0	0	0	0	0	0
12231	Btn1a1	0	0	0.02	0	0	0	0.01	0	0	0	0	0	0.01	0.03	0	0	0	0	0	0	0	0	0	0	0	0	0	0	0	0	0	0	0	0	0	0	0	0	0	0	0	0	0	0	0
192194	Btnl10	0.02	0.02	0	0.02	0	0.04	0.02	0.01	0.02	0.03	0.02	0	0.01	0.07	0.02	0.05	0.03	0.01	0.02	0	0	0	0	0	0	0	0	0	0	0	0	0	0	0	0	0	0	0	0	0	0	0	0	0	0
624681	Btnl6	0	0	0	0	0	0	0	0	0	0	0	0	0	0	0	0	0	0	0	0	0	0	0	0	0.04	0	0	0	0	0	0	0	0	0	0	0	0	0	0	0	0	0	0	0	0
237754	Btnl9	0	0	0	0	0	0	0	0	0	0	0	0	0	0	0	0	0	0	0	0	0	0	0	0	0	0	0	0	0	0	0	0	0	0	0	0	0.18	0	0	0	0	0	0	0	0
12234	Btrc	0.04	0.02	0.11	0.01	0.02	0	0.01	0	0	0	0.03	0.75	0.02	0	0	0.01	0.02	0	0	0	0	0	0	0	0.04	0	0.17	0	0	0	0.04	0	0	0	0	0	0.02	0	0	0.02	0	0.01	0	0	0
12235	Bub1	0	0.01	0.01	0	0.01	0.02	0.01	0	0	0	0	0	0	0	0	0.01	0	0	0	0	0	0	0	0	0	0	0	0	0	0	0	0	0	0	0	0	0	0	0	0	0	0	0	0	0
12236	Bub1b	0.06	0.04	0.22	0.04	0.11	0.08	0.04	0.01	0.06	0.02	0.01	0.02	0.04	0.01	0	0.01	0	0	0	0	0	0	0	0	0	0	0.02	0	0	0	0	0	0	0	0	0	0	0	0	0	0	0	0	0	0
12237	Bub3	2.09	2.87	7.98	6.25	3.63	5.55	4.34	2.12	3.49	1.61	2.15	3.01	2.46	2.8	2.83	2.21	10.53	2.18	1.92	1.28	1.76	1.42	3.54	2.36	4.81	2.43	2.59	0.84	10.82	5.81	3.81	2.46	4.04	0.77	1.98	4.71	1.32	2.06	1.82	2.11	0.64	0.13	0.47	0.62	2.82
215051	Bud13	0.05	0.01	0.03	0.04	0.02	0	0.03	0	0.02	0	0.04	0.01	0	0.01	0.09	0	0	0.01	0	0.03	0.02	0.08	0.02	0	0	0.23	0	0	0.01	0	0	0	0	0	0.01	0	0	0	0	0	0	0	0	0	0
66138	Bud23	0.9	1.04	0.04	0.26	0.32	0.12	0.74	0.04	0.68	0.08	0.25	0.03	0.32	0.46	0.01	0.08	0.06	0.55	0.09	0	0	0.05	0	0	0.07	0.11	0.05	0.77	0.01	0	0.08	0.02	0.04	0.03	0	0	0	0	0	0	0	0	0	0	0
231889	Bud31	0.27	0.99	0.73	0.79	0.64	1.23	0.24	0.63	0.55	0.18	0.5	0.53	0.4	0.17	0.63	0.16	0.12	0.9	0.03	0.14	0.29	0.17	0.1	0.53	0.75	0.34	0.78	0.39	0.22	0.23	0.1	0	0.23	0.14	0.27	0.26	0.39	0.25	0.2	0.03	0	0.12	0.08	0.03	0.04
434436	BY080835	0	0	0	0	0	0	0	0	0	0	0	0	0	0	0	0	0	0	0	0	0	0	0	0	0	0	0	0	0	0	0	0	0	0	0	0	0	0	0	0	0	0	0	0.04	0
53414	Bysl	0.56	0.81	0.49	0.56	0.59	0.52	0.48	0.28	0.43	0.11	0.35	0.29	0.39	0.33	0.15	0.11	0.11	0.07	0.04	0.05	0.19	0.06	0.65	0.19	0.27	0.22	0.03	0.03	0	0.05	0	0.04	0.04	0	0.02	0.02	0.08	0.04	0.03	0.05	0	0	0.03	0.04	0
66882	Bzw1	2.85	2.55	6.89	3.77	3.98	5.48	2.96	2.38	2.33	2	2.46	1.86	2.64	1.96	1.78	2.58	3.15	1.52	3.44	3.14	1.53	2.88	2.79	1.87	4	3.52	3.3	5.63	2.7	3.8	8.33	4.3	3.01	1.59	4.8	2.47	2.81	2.35	2.12	2.05	0.95	1.15	0.99	1.05	0.71
66912	Bzw2	0.78	0.58	1.67	0.42	0.76	0.3	0.26	0.47	0.2	0.7	0.18	0.21	0.3	0.17	0.33	0.7	0.34	0.2	0.41	0.14	0.41	0.2	0.13	0.4	0.71	0.07	0.21	0.32	0.02	0.12	0.13	0.03	0.08	0.04	0.04	0.13	0.05	0.06	0.04	0.03	0.01	0.01	0.03	0.12	0.02
223665	C030006K11Rik	0.01	0.04	0	0	0	0	0.01	0	0	0.01	0.02	0.03	0.02	0.01	0.03	0	0.07	0.05	0	0.1	0	0	0.17	0.15	0.2	0.27	0.2	0.35	0.02	0.18	0.53	0.38	0.28	0.28	0.15	0.27	0.9	0.23	0.26	0.35	0.43	0.18	0.17	0.05	0.17
319772	C130050O18Rik	0	0	0	0	0	0	0	0	0	0	0	0	0	0	0.01	0	0	0	0	0	0	0	0	0.01	0	0	0.02	0	0	0	0	0	0	0	0	0.02	0	0	0	0	0	0	0	0.01	0
57316	C1d	0.21	0.3	0.41	0	0	0	0	0	0	0	0	0	0	0	0	0	0	0	0	0	0	0	0	0	0	0	0	0	0	0	0	0	0	0	0	0	0	0	0	0	0	0	0	0	0
94192	C1galt1	0.01	0.01	0	0	0.04	0.01	0.03	0	0	0.01	0.01	0.02	0.1	0.03	0	0	0	0.08	0.01	0.06	0	0	0	0	0.01	0	0	0.02	0	0.02	0.03	0	0.01	0.03	0.01	0	0.03	0.01	0	0	0	0	0	0.33	0.14
59048	C1galt1c1	0	0	0	0	0	0	0	0	0.09	0	0	0	0	0	0	0	0	0	0	0	0	0	0.03	0	0	0	0	0	0	0.06	0	0	0	0	0	0	0	0	0	0	0	0	0	0	0.04
12259	C1qa	0	0	0	0	0.01	0	0	0.02	0	0.01	0.02	0	0	0	0.01	0.02	0	0.01	0.03	0	0.02	0.01	0	0.01	0.04	0	0.01	0	0	0.11	0	0	0	0	0	0.01	0.05	0.01	0.01	0	0	0	0.03	0.03	0.01
12260	C1qb	0	0	0	0.02	0	0.01	0.02	0	0	0	0	0	0	0	0.04	0.04	0.06	0	0.07	0.12	0.06	0.13	0.13	0.05	0.17	0.09	0.06	0.1	0	0	0.05	0.3	0	0.12	0	0	0.16	0	0	0.11	0.05	0	0	0	0
12261	C1qbp	11.48	6.29	16.73	7.33	5.49	7.59	8.99	7.24	6.48	4.24	4.97	4.56	5.51	4.35	4.54	3.69	5.37	9.29	7.29	6.16	4.02	5.94	14.3	8.31	8.13	15.46	9.21	10	5.6	6.7	12.18	14.6	10.19	12.86	6.63	8.85	9.71	10.18	9.81	6.42	8.96	6.56	10.07	8.09	10.35
12262	C1qc	0.01	0	0.1	0	0.02	0	0.03	0.1	0.04	0	0.02	0.1	0.03	0	0.08	0.04	0.05	0.11	0.02	0.08	0.01	0.08	0.14	0.15	0.11	0.1	0.01	0.13	0.14	0.36	0.1	0.55	0.17	0.1	0	0.06	0.08	0.1	0.07	0.07	0.05	0.07	0.05	0.06	0.04
23829	C1ql1	0	0	0	0	0	0	0	0	0	0	0	0	0	0	0	0	0	0	0	0	0	0	0	0	0	0	0	0	0	0	0	0	0	0	0	0	0	0.02	0	0	0	0	0	0	0
226359	C1ql2	0	0	0	0	0	0	0	0	0	0	0	0	0	0	0	0	0	0	0	0	0	0	0	0	0	0	0	0.02	0	0	0	0	0	0	0	0	0	0	0	0	0	0	0	0	0
56745	C1qtnf1	0	0	0	0	0	0	0	0	0	0	0	0	0	0	0	0	0	0	0	0	0	0	0	0	0	0	0.05	0	0	0	0	0	0	0	0	0	0	0	0	0	0	0	0	0	0
81799	C1qtnf3	0	0	0	0.03	0	0	0	0	0	0	0.02	0	0	0	0	0.04	0.02	0.09	0	0	0.11	0	0.14	0	0.09	0	0.05	0.08	0	0.07	0.73	0.48	0.1	0	0	0	0	0	0	0	0	0	0	0	0
67445	C1qtnf4	0	0	0	0	0	0	0	0	0	0	0	0	0	0	0	0	0	0.01	0	0	0	0	0	0	0	0	0	0	0	0	0	0	0	0	0	0	0	0	0	0	0	0	0	0	0
239126	C1qtnf9	0	0	0	0	0	0	0	0	0	0	0	0	0	0	0	0	0	0	0	0	0	0	0	0	0	0	0	0	0.02	0	0	0	0	0	0	0	0	0	0	0	0	0	0	0	0
50909	C1ra	0	0	0	0	0	0	0	0	0	0	0	0	0	0	0	0	0	0	0	0.02	0	0	0.03	0.02	0	0.03	0	0	0.06	0.01	0.11	0.09	0.03	0.05	0.08	0.03	0.04	0.02	0.01	0.06	0.07	0.01	0.04	0.02	0.04
667277	C1rb	0	0	0	0	0	0	0	0	0.01	0	0	0	0	0	0	0	0	0	0	0	0	0	0	0	0	0	0	0	0	0.01	0.04	0	0.01	0.02	0	0.03	0	0	0.01	0.01	0.01	0	0.03	0.01	0.01
232371	C1rl	0	0	0	0	0	0	0	0	0.14	0	0	0.13	0	0	0.04	0	0.01	0.01	0	0	0.11	0	0	0.05	0	0.02	0.02	0.13	0.14	0.3	0	0.3	0.41	0.19	0.18	0.1	0.15	0.17	0.28	0.01	0.13	0.2	0.37	0.35	0.12
50908	C1s1	0	0	0	0	0	0	0	0	0	0	0.01	0.02	0	0	0.03	0	0.04	0.05	0	0.1	0.06	0.06	0	0.01	0.01	0.04	0.01	0.12	0.03	0.1	0	0.07	0.07	0.18	0.13	0.08	0.07	0.04	0.04	0.03	0.01	0.05	0.05	0.05	0.02
317677	C1s2	0	0	0	0	0	0	0	0	0	0	0	0.01	0	0	0	0	0.03	0.02	0	0.08	0.02	0.04	0	0	0	0.04	0	0.06	0.03	0.06	0	0.04	0.05	0.09	0.1	0.02	0.04	0.03	0.03	0.01	0	0.04	0.05	0.02	0.02
12263	C2	0.09	0	0.04	0	0	0	0	0	0	0.01	0.01	0.02	0	0	0.04	0	0.01	0.02	0	0	0.02	0	0	0.01	0	0	0	0.02	0	0.06	0	0.1	0.15	0.03	0	0	0	0	0	0.01	0.23	0.01	0.03	0.01	0.08
207781	C2cd2	0	0.01	0	0	0	0	0	0	0	0	0	0	0	0	0	0	0.01	0	0	0.01	0	0	0.01	0	0.04	0.03	0.02	0	0.07	0.17	0.03	0.03	0.08	0.05	0.07	0.16	0.18	1.54	0.8	1.07	0.51	0	0.94	0.23	0.52
71764	C2cd2l	0	0	0	0	0	0	0	0	0	0	0	0	0	0	0	0.01	0	0	0.01	0	0	0.01	0	0	0.01	0	0.02	0.03	0.02	0.01	0.04	0.01	0.01	0.04	0.01	0.01	0.03	0.03	0.04	0.02	0	0.04	0.02	0.03	0.06
244911	C2cd4a	0	0	0	0	0	0	0	0	0	0	0	0	0	0	0	0	0	0	0	0	0	0	0	0	0	0	0	0	0	0	0	0	0	0	0	0	0.08	0	0	0.09	0	0	0	0	0
75697	C2cd4b	0	0	0	0	0	0	0	0	0	0	0	0	0	0	0	0	0	0	0	0	0	0	0	0	0	0	0	0	0	0	0	0	0	0	0	0	0.08	0	0	0.09	0	0	0	0	0
74741	C2cd5	0.01	0	0	0.01	0.02	0.01	0.01	0	0.01	0	0	0.06	0.01	0	0.03	0.01	0	0	0	0	0	0	0.06	0	0	0	0.01	0	0	0	0	0	0	0	0	0	0	0	0	0	0	0	0	0	0
73463	C2cd6	0	0	0	0	0	0	0	0	0.02	0	0	0	0	0	0	0	0	0	0	0	0	0	0	0	2.23	0	0.07	0	0	0.07	0	0	0	0	0	0	0	0	0	0	0	0	0	0	0.05
12266	C3	0.05	0.03	0.04	0.11	0.11	0.04	0.15	0.82	0.62	0.3	0.31	0.69	0.25	0.2	1.75	0.58	0.78	4.13	3.07	2.88	2.66	1.53	1.88	1.26	4.88	3.82	3.53	5.66	5.99	12.43	6.34	5.78	5.24	5.09	4.55	5.32	3.6	6.5	5.71	4.18	2.74	3.92	2.04	3.08	2.81
101744	C330005M16Rik	0	0	0	0	0	0	0	0	0.02	0	0	0	0	0	0	0	0	0	0	0	0	0	0	0	0	0	0	0	0	0	0	0	0	0	0	0	0	0	0	0	0	0	0	0	0
77644	C330007P06Rik	0.14	0.03	0.17	0.28	0.06	0.2	0.11	0.07	0.08	0.26	0.12	0.21	0.14	0.14	0.04	0.02	0.09	0.03	0.01	0.16	0.12	0.09	0	0	0	0.03	0	0.02	0.02	0.1	0	0.03	0.25	0.03	0	0	0.02	0.03	0.13	0	0.01	0.02	0	0.08	0.02
625018	C4a	0	0.02	0	0	0	0	0	0	0	0	0	0	0	0	0	0	0	0.02	0.07	0.05	0.01	0.02	0.01	0.02	0.11	0.21	0.08	0.1	0.1	0.17	0.07	0.17	0.07	0.1	0.09	0.06	0.11	0.2	0.1	0.11	0.11	0.08	0.1	0.13	0.06
12268	C4b	0	0	0	0	0	0	0	0	0	0	0	0.01	0	0	0.01	0	0	0.1	0.15	0.14	0.03	0.05	0.06	0.06	0.33	0.41	0.26	0.24	0.2	0.56	0.24	0.58	0.2	0.2	0.21	0.3	0.38	0.64	0.54	0.46	0.23	0.24	0.41	0.37	0.27
12269	C4bp	0	0	0	0	0	0	0	0	0	0	0	0	0	0	0	0	0	0	0	0	0	0	0	0	0	0	0	0	0	0	0	0	0	0.03	0.02	0.02	0.15	0.38	0.34	0.18	0.18	0.18	0.37	0.37	0.48
12273	C5ar1	0	0	0	0	0	0	0	0	0	0	0	0	0	0	0.02	0	0	0.02	0.05	0	0	0	0	0.01	0	0	0.02	0	0	0.02	0	0	0.01	0	0	0	0	0	0	0	0	0	0	0	0
12274	C6	0	0	0	0	0	0	0	0	0	0	0	0	0	0	0	0	0	0	0	0	0	0	0	0	0	0	0	0	0	0	0	0	0	0	0	0	0	0	0	0	0	0	0.2	0.09	0.26
109828	C7	0	0	0	0	0	0	0	0	0	0	0	0	0	0	0	0	0	0	0	0	0	0	0	0	0	0	0	0	0	0	0	0	0	0	0	0	0.01	0	0	0	0	0	0.04	0.06	0.04
97130	C77080	0	0	0	0	0	0	0	0	0	0	0	0	0	0	0	0	0.01	0.02	0	0	0	0	0	0	0	0.01	0.01	0	0.01	0	0.01	0	0	0	0.01	0.01	0.01	0.04	0.01	0.01	0	0	0.04	0.07	0.06
230558	C8a	0	0	0	0	0	0	0	0	0	0	0	0	0	0	0	0	0	0	0	0	0	0	0	0	0.02	0.01	0.01	0.01	0.04	0.17	0.01	0	0	0.01	0.01	0.02	0.01	0.05	0.05	0.21	0.01	0.02	0.43	0.27	0.33
110382	C8b	0	0	0	0	0	0	0.01	0.11	0.07	0.03	0.07	0.2	0.06	0.08	0.41	0.24	0.32	1.38	0.45	0.76	1.27	0.14	0.07	0.05	0.02	0.07	0.02	0.03	0	0.05	0.01	0.02	0	0.05	0.1	0.01	0.16	0.14	0.15	0.18	0.08	0.1	0.28	0.21	0.23
69379	C8g	0	0	0	0	0	0	0	0	0	0	0	0	0	0	0.02	0	0	0	0.01	0	0.03	0	0	0.04	0	0.02	0.07	0	0.21	0.28	0.65	0.05	0.15	0.13	0.22	0.3	0.38	0.4	0.21	1.3	0.23	0.3	1.03	0.93	0.81
12279	C9	0	0	0	0	0	0	0	0	0	0	0	0	0	0	0	0	0	0	0	0	0	0	0	0	0	0	0	0	0	0	0	0	0	0.01	0.02	0	0.02	0	0.04	0.14	0.03	0.02	0.23	0.28	0.24
667803	C920025E04Rik	0	0	0	0	0	0	0	0.02	0.01	0.01	0.01	0	0.01	0.01	0.02	0.01	0.01	0.01	0.02	0.06	0.01	0.03	0.05	0.04	0.06	0.09	0.1	0.18	0.05	0.14	0.07	0.2	0.15	0.05	0.07	0.06	0.13	0.25	0.48	0.14	0.08	0.15	0.87	0.53	0.19
67770	Caap1	0	0	0.03	0.03	0	0.02	0	0	0	0	0	0	0.02	0	0	0	0	0	0	0	0	0	0	0	0.04	0	0.02	0	0	0.02	0	0	0.22	0.03	0.02	0.03	0	0.17	0	0	0	0	0	0.08	0.05
12283	Cab39	2.61	2.5	0.84	2.32	1.69	2.36	1.52	1.07	1.07	1.33	2.14	1.28	1.07	1.77	0.83	0.9	0.99	2.21	0.94	1.61	2.4	1.33	3.58	1.06	0.46	1.77	2.09	2.95	1.21	3.2	2.49	2.3	0.81	0.63	1.04	5.81	1.08	2.11	4.74	0.56	1.49	0.35	0.52	0.86	1.29
69008	Cab39l	0.1	0.11	0.25	0.09	0.12	0.14	0.12	0.13	0.15	0.14	0.09	0.13	0.12	0.14	0.13	0.11	0.03	0.18	0.18	0.09	0.1	0.09	0.17	0.13	0.07	0.07	0.22	0.17	0.3	0.29	0.05	0.39	0.41	0.02	0.42	0.49	0	0.57	0.24	0.18	0.01	0.25	0.18	0.7	0.64
104248	Cabin1	0	0	0.04	0	0	0.04	0	0	0.01	0.01	0	0	0.02	0	0	0	0	0	0	0	0	0	0	0	0	0	0	0	0	0	0	0	0	0	0	0	0	0	0	0	0	0	0	0	0
70977	Cabs1	0	0	0	0	0	0.11	0	0	0	0	0	0	0	0	0	0	0	0	0	0.33	0	0	0	0	0	0	0	0	0	0	0	0	0	0	0.73	0	0	0	0	0	0.41	0.58	0.18	0	0
320508	Cachd1	0	0	0	0	0	0	0	0	0	0	0	0	0	0	0	0	0	0	0	0	0	0	0	0	0	0	0	0	0	0	0	0	0	0	0	0	0	0	0	0.03	0	0	0	0	0
12286	Cacna1a	0	0	0	0	0	0	0	0	0	0	0	0	0	0	0	0	0	0	0	0	0	0.01	0	0	0.01	0	0	0	0	0	0.04	0	0	0.07	0	0.01	0.02	0	0	0.05	0	0	0	0	0
12288	Cacna1c	0	0	0	0	0	0	0	0	0	0	0	0	0	0	0	0	0	0	0.01	0	0	0	0	0	0	0	0	0	0	0	0	0	0	0	0	0	0	0	0	0	0	0	0	0	0
12290	Cacna1e	0	0	0	0	0	0	0	0	0	0	0	0	0	0	0	0.01	0.01	0	0.01	0	0	0	0	0	0.03	0.01	0	0	0	0	0.03	0	0	0	0	0	0.01	0	0	0.02	0	0	0	0	0
54652	Cacna1f	0	0	0	0	0	0	0	0	0	0	0	0	0.03	0	0	0	0	0	0	0	0	0	0	0	0	0	0	0	0	0	0	0	0	0	0	0	0	0	0	0	0	0	0	0	0
12291	Cacna1g	0	0	0	0.01	0	0	0	0	0	0	0	0	0	0	0	0	0	0	0.02	0	0	0.01	0.03	0	0	0.07	0	0	0	0.01	0.02	0	0	0	0.02	0	0	0	0	0	0	0.01	0	0	0
12295	Cacnb1	0	0	0	0	0	0	0	0	0	0	0	0	0	0	0	0	0	0	0	0	0	0	0	0	0	0	0	0	0	0	0	0	0	0	0	0.02	0	0	0	0	0	0	0	0	0
12296	Cacnb2	0	0	0	0	0	0	0	0	0	0	0	0	0	0	0	0	0	0	0	0	0	0	0	0	0	0	0	0	0	0	0	0	0	0	0	0.01	0	0	0	0	0	0.01	0	0	0
12297	Cacnb3	0	0.04	0	0	0	0	0	0	0	0	0	0	0	0.01	0	0	0	0	0	0	0.15	0.1	0.05	0	0	0	0	0.27	0.26	0	0	0.11	0	0.64	0.35	0.11	0.08	0	0.19	0	0.8	0	0.14	0	0
12298	Cacnb4	0	0	0	0	0	0	0	0	0	0	0	0	0	0	0	0	0	0	0	0	0	0	0	0	0	0	0	0	0	0	0	0	0	0	0	0.02	0	0	0	0	0	0	0	0	0
70312	Cactin	0.02	0.02	0.02	0.02	0.04	0.07	0.06	0.03	0.02	0.02	0.01	0.01	0.06	0.03	0.02	0.01	0.01	0	0	0.03	0.04	0	0	0.03	0	0	0.02	0.01	0.1	0	0	0	0.02	0	0	0.05	0	0	0	0	0	0	0	0	0
78832	Cacul1	0	0	0	0	0.01	0.02	0.01	0	0	0.02	0.01	0	0.02	0	0	0.03	0	0	0.01	0	0	0	0	0.01	0	0.01	0.01	0	0	0	0	0.01	0	0	0	0	0	0	0	0	0	0	0	0	0
12301	Cacybp	13.23	20.76	16.89	11.15	7.73	6.96	10.52	4.25	5.09	4.13	12.68	8.79	13.02	13.14	3.72	2.63	9.77	4.87	4.2	3.8	2.33	3.58	5.8	1.31	4.31	5.47	2.86	2.04	1.72	3	3.83	4.51	2.24	2.77	0.76	2.56	2	4.43	3.16	1.01	1.4	1.15	1.67	1.92	1.89
69719	Cad	2.03	1.89	2.31	2.12	2.02	2.19	1.71	1.31	1.37	1.55	1.2	1.53	1.59	1.12	2.25	1.76	1.58	4.27	6.62	5.54	2.99	13.44	21.72	17.73	49.6	28.62	25.06	25.99	17.24	18.42	80.96	34.57	17.38	55.29	54.1	35.29	124.7	72.11	62.23	106.12	86.41	83.37	49.07	62.74	62.89
54725	Cadm1	0	0	0.01	0	0	0	0	0	0	0	0.02	0	0	0	0	0	0	0.01	0.02	0.01	0.01	0.02	0.03	0	0.05	0.04	0.05	0	0.05	0.09	0.13	0.22	0.12	0	0.05	0.03	0	0	0	0	0	0	0.06	0.06	0
94332	Cadm3	0	0	0	0	0	0	0	0	0	0	0	0	0	0	0	0	0	0	0	0	0	0	0	0	0	0	0.03	0	0	0	0	0	0.03	0	0	0	0	0	0.02	0	0	0	0	0.01	0
27062	Cadps	0	0	0	0	0	0	0	0	0	0	0	0	0	0	0	0	0	0	0	0	0	0	0	0	0	0	0	0	0	0	0	0	0	0.03	0	0	0	0	0	0	0	0	0	0	0
71213	Cage1	0	0.01	0	0	0	0	0	0	0	0	0	0	0	0	0	0	0	0	0	0	0	0	0	0	0	0	0	0	0	0	0	0	0	0	0	0	0	0	0	0	0	0	0	0	0
12310	Calca	0	0	0	0	0	0	0	0	0	0	0	0	0	0	0	0	0	0	0	0	0	0	0	0	0	0	0	0	0	0	0	0	0	0	0	0	0	0	0	0.56	0	0	0	0	0
67488	Calcoco1	0	0.01	0.01	0	0	0	0	0.01	0	0	0	0	0	0	0	0	0	0	0	0	0	0.01	0.01	0	0	0	0	0	0	0	0	0	0	0	0	0	0	0	0	0	0	0	0	0	0
76815	Calcoco2	0	0	0	0	0	0	0	0	0	0	0	0	0	0	0	0	0	0	0	0.1	0	0	0	0	0	0	0	0	0	0	0	0	0	0	0	0	0	0	0	0	0	0	0	0	0
54598	Calcrl	0	0.02	0.03	0.01	0.08	0	0	0.12	0	0.02	0.02	0.01	0.01	0	0.02	0	0.02	0.04	0.05	0.03	0.02	0.07	0.15	0	0	0.02	0	0.05	0.17	0	0.05	0	0	0	0.07	0.03	0.1	0.25	0	0.02	0	0.02	0	0.16	0
109624	Cald1	0.43	0.58	1.34	0.33	0.89	1.74	0.41	1.34	1.17	0.53	0.64	0.79	0.49	0.49	1.98	0.58	0.73	2.75	1.35	1.97	2.51	1.16	1.06	2.56	2.62	2.55	1.67	2.03	3.72	6.73	2.43	3.3	5.29	2.02	4.94	5.8	1.58	6.04	5.45	1.21	1.24	2.19	3.17	3.91	2.56
546729	Calhm1	0	0	0	0	0	0	0	0	0	0	0	0	0	0	0	0	0.1	0	0	0	0	0	0	0	0	0	0	0	0	0	0	0	0	0	0	0	0	0	0	0	0	0	0	0	0
72691	Calhm2	0	0	0	0	0	0	0	0	0	0	0	0	0	0	0	0	0	0	0	0	0	0	0	0	0	0	0	0.11	0	0	0	0	0	0	0	0	0	0	0	0	0	0	0	0	0
215900	Calhm6	0	0	0	0	0	0	0	0	0	0	0	0	0	0.08	0	0	0	0	0	0	0	0	0	0	0	0	0	0	0	0	0	0	0	0	0	0	0	0	0	0	0	0	0	0	0
12313	Calm1	4.7	5.04	11.68	6.42	9.64	4.71	7.47	7.6	7.91	3.99	7.6	4.52	2.87	5.7	4.89	4.05	3.31	9.77	7.17	10.95	4.98	7.03	13.47	8.81	11.7	13.88	13.81	6.81	13.42	20.63	16.04	14.34	16.13	21.11	22.24	18.72	10.97	14.97	10.21	7.73	12.25	9.23	8.35	14.23	9.6
12314	Calm2	4.7	5.04	11.68	6.42	9.64	4.71	7.47	7.6	7.91	3.99	7.6	4.52	2.87	5.7	4.89	4.05	3.31	9.77	7.17	10.95	4.98	7.03	13.47	8.81	11.7	13.88	13.81	6.81	13.42	20.63	16.04	14.34	16.13	21.11	22.24	18.72	10.97	14.97	10.21	7.73	12.25	9.23	8.35	14.23	9.6
12315	Calm3	4.7	5.04	11.68	6.42	9.64	4.71	7.47	7.6	7.91	3.99	7.6	4.52	2.87	5.7	4.89	4.05	3.31	9.77	7.17	10.95	4.98	7.03	13.47	8.81	11.7	13.88	13.81	6.81	13.42	20.63	16.04	14.34	16.13	21.11	22.24	18.72	10.97	14.97	10.21	7.73	12.25	9.23	8.35	14.23	9.6
70405	Calml3	4.65	5.84	7.67	3.11	4.77	3.07	6.04	6.13	6.1	3.8	6.16	3.23	3.21	4.09	2.12	4.1	3.17	8.36	8.03	5.78	3.02	7.34	9.91	4.2	10.4	12.2	6.95	6.72	7.1	13.31	16.12	12.34	11.88	17.38	17.76	9.86	7.08	8.23	5.12	6.75	9.08	9.42	5.91	5.3	4.19
75600	Calml4	0	0	0	0	0	0	0	0	0	0	0	0	0	0	0	0	0	0	0	0	0	0	0	0	0	0	0.01	0.09	0	0	0	0	0	0	0	0	0	0	0	0	0	0	0	0	0
12317	Calr	53.86	41.05	72.14	44.32	39.63	41.94	37.97	46.3	54.31	55.24	53.02	49.01	59.08	48.58	49.82	50.44	72.07	125.64	128.58	129.48	81.24	96.75	125.62	69.49	212.91	178.24	136.81	196.82	143.95	214.12	212.34	217.37	179.37	182.99	151.7	171.99	150.47	125.59	134.05	161.12	93.99	93.53	136.28	113.88	94.74
12321	Calu	3.42	3.49	7.21	4.32	5.06	5.74	2.95	6.71	6.15	4.82	4.7	4.7	4.47	3.25	5.02	5.31	5.46	13.67	11.52	11.45	12.86	6.8	10.23	9.19	11.78	13.14	8.73	10.15	11.5	17.51	12.75	23.22	16.43	20.95	13.86	12.3	8.01	8.54	10.95	3.55	5.52	4.88	3.19	3.24	3.58
52163	Camk1	0.03	0.05	0.12	0.13	0.07	0.1	0.04	0.11	0.16	0.04	0.05	0.1	0.03	0.08	0.15	0.08	0.12	0.09	0.13	0.18	0.14	0.03	0.15	0.06	0.09	0.19	0.17	0.28	0.33	0.55	0.18	0.33	0.31	0.59	0.15	0.2	0.33	0.03	0.62	0.21	0.07	0.04	0.04	0.11	0.87
227541	Camk1d	0	0	0	0.02	0	0.02	0.02	0	0	0.01	0.01	0	0	0.01	0.02	0.05	0.02	0	0.02	0.02	0.03	0	0.03	0	0	0.07	0	0.1	0.24	0.41	0.04	0.07	0.07	0.03	0.04	0	0.29	0	0.24	0.18	0.04	0.25	0	0	0.64
12322	Camk2a	0.01	0	0.01	0.01	0.01	0.01	0	0.01	0.01	0.01	0.01	0.01	0.01	0.01	0	0.01	0.01	0.02	0.01	0	0.02	0.02	0.02	0.03	0.02	0.03	0.03	0.03	0.03	0.04	0.03	0.07	0.02	0.08	0.02	0.05	0.03	0.03	0.02	0.02	0.03	0	0.02	0.02	0.02
12323	Camk2b	0.01	0	0.01	0.01	0.01	0.01	0	0.02	0.01	0.01	0.01	0.03	0.01	0.01	0.01	0.02	0.01	0.55	0.02	0.01	0.02	0.02	0.04	0.04	0.03	0.04	0.04	0.05	0.04	0.07	0.03	0.06	0.05	0.08	0.02	0.04	0.02	0.04	0.02	0.02	0.02	0	0.02	0.03	0.02
108058	Camk2d	0.01	0.01	0.03	0.03	0.02	0.02	0.02	0.04	0.03	0.02	0.03	0.04	0.02	0.02	0.02	0.01	0.04	0.05	0.26	0.08	0.02	0.05	0.06	0.08	0.1	0.11	0.15	0.52	0.12	0.14	0.15	0.26	0.26	0.14	0.15	0.13	0.11	0.18	0.08	0.02	0.03	0.03	0.09	0.06	0.03
12325	Camk2g	0.01	0.01	0.04	0.04	0.03	0.01	0.03	0.05	0.02	0.07	0.01	0.07	0.01	0.02	0.02	0.02	0.02	0.06	0.02	0.04	0	0.02	0.14	0.05	0.01	0.06	0.06	0.09	0.06	0.07	0.04	0.11	0.05	0.09	0.04	0	0.01	0.06	0.02	0.02	0.02	0	0.03	0.03	0.01
12328	Caml	0	0	0	0.01	0	0	0.12	0.02	0	0	0	0	0	0.01	0	0	0.03	0	0	0	0	0	0	0	0	0	0	0	0	0	0	0	0	0	0	0	0	0	0	0	0	0	0	0	0
12796	Camp	0	0	0	0.02	0.08	0.04	0.18	3.94	2.06	1.72	1.41	2.71	0.31	0.17	2.87	5.36	5.36	1.64	12.82	17.23	10.71	2.33	4.18	1.5	0.69	2.19	1.71	7.13	4.16	0.67	1.23	0.85	4.71	0.93	0	0	0	0	0	0	0	0	0	0	0
227634	Camsap1	0	0	0	0	0.01	0	0	0	0	0	0	0	0	0	0	0	0	0	0	0	0	0	0	0	0	0	0	0	0	0	0	0	0	0	0	0	0	0	0	0	0	0	0	0	0
67886	Camsap2	0	0	0.04	0.01	0	0.01	0	0	0.01	0	0.01	0	0.01	0	0	0	0	0.13	0	0	0	0	0	0	0	0	0	0	0	0	0	0	0	0	0	0	0	0	0	0	0	0	0	0	0
69697	Camsap3	0.06	0	0	0	0	0	0	0	0	0	0	0	0	0	0	0	0	0	0	0	0	0	0	0	0	0	0.01	0	0	0	0	0	0.02	0	0	0	0	0	0	0	0	0	0.02	0	0.01
71902	Cand1	1.98	1.67	2.8	1.82	1.53	2.34	1.44	2.04	1.57	0.96	1.39	1.61	1.4	1.47	1.62	1.32	1.41	2.21	1.53	1.79	2.06	1.75	2.24	1.98	2.8	2.6	1.96	1.99	2.28	2.74	2.51	3.08	3.36	2.9	2.91	2.8	2.3	3.34	2.06	1.87	1.75	1.82	1.95	2.37	2.67
67088	Cand2	0.25	0.2	0.33	0.19	0.17	0.2	0.09	0.09	0.09	0.07	0.06	0.1	0.07	0.06	0.07	0.1	0.06	0.1	0.11	0.09	0.06	0.03	0	0.08	0.03	0.07	0.01	0.07	0.08	0.11	0.05	0.17	0.26	0.15	0.07	0.03	0.04	0.03	0.04	0.06	0.02	0.03	0.02	0.02	0.04
76025	Cant1	0	0.01	0	0	0	0	0	0	0.01	0	0	0.02	0.02	0.03	0	0.05	0	0	0	0	0	0	0	0	0	0	0	0	0	0.04	0	0	0	0	0	0.01	0	0.14	0	0.03	0	0.8	0	0	0
12330	Canx	7.92	6.65	10.57	6.79	6.02	5.47	7.1	8.9	7	5.52	4.7	6.37	9.65	7.2	5.94	8.59	7.39	12.94	9.98	11.96	7.72	9.79	10.51	8.66	20.73	15.45	13.24	13.26	13.84	16.79	14.89	21.13	15.65	17.22	16.43	12.85	14.4	18.12	14.55	11.51	10.57	8.32	11.72	8.96	11.14
12331	Cap1	3.51	3.2	5.05	3.64	2.58	3.38	3.02	5.61	5.07	3.13	2.23	4.38	2.65	1.79	4.98	3.98	4.52	5.04	6.73	6.39	6.88	5.83	6.79	7.68	12.66	8.39	9.3	10.25	7.34	13.53	8.32	12.82	11.89	8.1	7.82	8.19	5.15	7.28	6.38	6.04	5.26	4.66	3.95	4.19	4.62
67252	Cap2	1.13	0.86	0.35	0.24	0.25	0.2	0.18	0.28	0.22	0.73	0.56	0.14	0.36	0.2	0.52	0.92	0.39	0	0.91	1.42	0.01	1.84	1.12	1.16	2.44	2.3	1.24	2.83	1.18	1.71	3.33	2.9	1.63	3.23	1.04	0.75	1.71	1.31	0.84	1.32	1.24	0.82	0.26	0.63	0.32
12332	Capg	0.23	0.27	1.13	0.17	1.16	0.23	0.16	2.22	1.22	0.14	0.03	1.21	0.35	0.06	2.11	0.15	0.45	2.25	2.97	3.33	0.75	0.76	0.36	0.75	0.61	3.25	9.46	0.56	0.66	4.47	6.44	2.9	7.57	0.2	0.03	5.1	0	0	0	0.16	0.17	0	0.08	0.04	0.04
12333	Capn1	0.84	0.77	0.98	1.37	1.09	1.32	0.81	1.3	1.42	0.6	1.04	0.72	0.76	0.95	0.59	1.45	1.13	0.61	0.49	0.58	0.65	0.8	0.8	0.38	0.26	0.33	0.64	1.08	0.16	0.34	0.16	0.57	0.48	0.38	0.07	0.23	0.37	0.15	0.2	0.2	0.14	0.81	0.35	0.34	0.27
381122	Capn13	0	0	0	0	0	0	0	0	0	0	0	0	0.03	0	0	0	0	0	0	0	0	0	0	0.06	0.15	0	0	0	0	0	0	0	0	0	0	0	0	0	0	0	0	0	0	0	0
12334	Capn2	0.33	0.3	0.52	0.32	0.29	0.53	0.28	0.66	0.39	0.44	0.47	0.58	0.35	0.37	0.99	0.46	0.64	1.55	1.43	1.19	1.02	0.94	1.09	1.13	1.31	1.43	1.68	2.34	2.4	2.12	1.12	1.62	2.38	1.71	2.25	1.43	0.76	1.74	1.28	0.56	0.41	0.63	1.09	0.85	0.78
12337	Capn5	0.21	0.05	0.08	0.03	0.16	0.06	0.05	0.04	0.05	0	0.01	0.02	0.18	0.05	0	0	0.13	0.05	0.04	0	0	0	0	0	0.01	0.01	0.01	0.01	0	0	0.01	0	0	0	0	0	0	0	0	0	0	0	0	0	0
12338	Capn6	0.15	0.21	0.03	0.06	0.12	0.02	0.05	0.05	0.03	0.15	0.03	0.01	0.06	0.02	0.01	0.05	0.03	0.03	0.05	0.1	0	0.01	0.14	0.03	0.61	0.08	0.1	0.12	0.65	0.01	1.33	0.88	0.03	0	0.01	0	0	0	0	0	0	0	0	0	0
12339	Capn7	0	0.02	0	0	0.01	0	0	0.01	0	0	0	0	0.01	0	0	0	0	0.01	0	0	0	0	0.01	0	0.08	0	0	0	0	0	0	0	0.06	0.12	0.01	0.01	0.04	0	0.01	0.01	0	0	0	0.01	0.05
12336	Capns1	1.1	1.31	1.52	1.37	1.15	1.09	1.24	1.56	1.48	2.2	1.29	1.76	1.27	0.89	2.04	1.34	1.1	2.93	2.02	1.36	1.88	1.56	2.62	1.06	2.17	2.46	3.19	2	1.07	2.58	1.3	2.36	1.78	2.12	2.3	1.65	1.27	0.85	1.36	0.65	0.75	0.48	1.24	1.17	1.07
69543	Capns2	0.3	0.29	0.22	0.13	0.13	0.16	0.15	0.13	0.15	0.32	0.16	0	0.29	0.02	0.11	0.31	0.23	0.12	0.32	0.33	0.19	0.28	0	0.18	0.48	0.37	0.2	0.38	0.28	0.27	0.3	0.18	0.27	0.57	0.07	0.34	0.26	0.11	0.24	0.23	0.16	0	0.16	0.21	0.2
53872	Caprin1	5.58	3.95	8.87	3.72	4.82	4.63	3.28	2.73	5.04	2.89	2.09	3.28	4.26	2.38	2.77	2.51	2.4	2.44	1.93	2.1	2.26	1.36	3.4	2.79	3.05	2.47	2.22	3.83	1.37	3.63	1.51	2.16	2.59	1.92	3.56	2.05	2.97	4.13	3.68	1.74	1.74	1.63	2.34	2.24	1.32
12340	Capza1	4.06	2.8	6.03	3.1	4.12	3.63	3.39	3.88	4.07	2.79	3.23	3.95	2.85	3.38	2.88	2.28	3.2	5.55	4.38	6.2	4.2	3.79	6.22	3.18	5.56	8.36	3.92	5.17	4.24	4.16	5.04	7.41	6.61	6.8	3.32	3.8	2.58	4.13	4.08	2.29	3.27	1.92	2.6	2.86	2.6
12343	Capza2	1.96	2.67	4.28	2.71	2.47	2.82	3.77	3.65	3.27	3.42	2.75	4.95	2.89	2.8	4.8	2.98	2.63	7.64	3.33	7.74	5.99	3.71	8.47	5.02	7.35	9.37	4.92	5.18	9.28	7.68	7.36	12.64	8.96	9.97	10.71	8.38	5.08	7.53	6.29	5.22	6.63	4.17	5.05	6.14	5.81
12345	Capzb	5.73	4.13	9.04	4.76	5.84	6.19	4.07	6.49	5.71	4.63	4.56	15.36	4.23	4.53	6.69	5.77	4.4	10.09	9.75	7.26	8.58	5.73	9.62	9.52	8.51	13.47	9.52	9.21	9.74	11.99	10.46	15.53	10.67	10.34	12.47	8.34	6.91	9.88	7.43	6.71	8.71	6.55	4.6	5.19	5.37
12346	Car1	0.34	0.43	0.69	0.3	0.72	0.4	0.75	0.44	0.52	0.56	0.56	0.67	0.37	0.6	1.14	0.5	0.64	1.44	0.71	1.19	0.82	0.46	2.41	1.67	1.46	4.27	1.6	3.04	3.71	1.01	5.26	2.59	1.87	1.1	0.94	0.38	0.2	0.17	0.9	0.34	1.01	0.38	1.86	1.24	1.02
71934	Car13	0	0	0.28	0	0	0	0.04	0	0	0	0	0	0	0	0	0.02	0	0	0	0	0.02	0	0	0	0	0	0	0	0	0	0	0	0	0	0	0	0	0	0	0	0	0.29	0	0	0
23831	Car14	0	0	0	0	0.07	0.03	0.03	0.17	0.1	0.02	0.11	0.11	0.1	0.03	0.14	0.04	0.02	0.35	0.18	0	0.02	0.02	0.25	0.03	0.01	0.3	0.21	0	0.14	0.24	0.18	0.34	0.04	0.65	0.6	0.38	0.41	1.03	0.14	5.5	0.54	0.69	1.49	1.27	1.5
12349	Car2	68.39	60.13	172.06	64.96	122.03	143.8	94.86	125.26	143.88	54.18	90.68	185.27	93.86	85.66	136.39	54.51	28.61	129.46	43.25	45.46	142.47	32.25	29.83	28.83	17.85	39.98	26.81	45.94	31.51	30.99	21.68	22.66	25.82	20.91	24.87	25.75	12.21	26	19.22	6.09	23.64	13.98	12.92	11.82	11.09
12350	Car3	0.25	0.15	0	0.86	1.38	0.28	2.9	8.93	8.84	10.59	13.6	8.77	9.03	4.52	21.54	12.78	16.66	24.81	23.05	16.49	22.68	15.47	19.18	29.42	20.34	15.6	13.43	7.21	13.91	19.74	8	12.24	9.87	86.13	56.06	142.71	258.65	411.66	286.03	1296.84	1202.31	935.78	2834	2738.66	2647.17
12352	Car5a	0	0	0	0	0	0	0	0.01	0	0	0	0	0	0	0	0.12	0.69	0.11	0.12	0.11	0	0.05	0.28	0.05	0.03	0.07	0.02	0.16	0.36	0.18	1.15	0.14	0.3	1.68	1.51	2.4	4.6	3.39	2.73	3.05	5.76	4.5	1.99	1.91	3.67
56078	Car5b	0	0	0	0	0	0	0	0	0	0	0	0	0	0	0	0	0	0	0	0	0	0	0	0	0	0	0	0	0	0	0	0	0	0	0	0	0.11	0	0	0	0.01	0.02	0.02	0	0
12354	Car7	0	0	0	0	0	0	0	0	0	0.08	0	0	0	0	0	0	0	0	0	0	0	0	0	0	0	0	0	0	0	0	0	0	0	0	0	0	0	0	0	0	0	0	0	0	0
12319	Car8	0	0	0	0	0	0	0	0.03	0.04	0	0.02	0.07	0.01	0	0.06	0	0.03	0.19	0.07	0	0.03	0.03	0.04	0.03	0.06	0.07	0.1	0.1	0.06	0.17	0.27	0.02	0.4	0.18	0.57	0.37	0.15	0.26	0.47	0.19	0.2	0.3	0.42	2.43	0.2
108723	Card11	0	0	0	0	0	0	0	0	0	0	0	0	0	0	0	0	0	0	0	0	0	0	0	0.43	0	0	0.1	0	0	0.35	0	0	0.48	0	0	0.28	0	0.16	0.19	0	0.2	0.15	0.27	0.1	0.26
68480	Card19	0	0	0	0	0	0	0	0	0	0	0	0	0	0	0	0	0	0	0	0	0	0	0	0	0	0	0	0.02	0	0	0	0	0.03	0.04	0.09	0.07	0	0	0	0	0	0.01	0	0.02	0
239319	Card6	0	0	0	0	0	0	0	0	0	0	0	0	0	0	0	0	0	0	0	0	0	0	0	0	0	0	0	0	0	0	0	0	0.04	0	0	0	0	0	0	0	0	0	0.01	0	0
332579	Card9	0	0	0	0	0	0.06	0	0	0	0.09	0	0	0	0.1	0	0	0	0	0	0	0	0	0	0	0	0	0	0	0	0	0	0	0	0	0	0	0	0	0	0	0	0	0	0	0
52502	Carhsp1	0.71	1.08	1.27	0.71	1.24	0.76	1.41	1.61	1.64	0.67	0.93	1.66	1.56	0.83	0.35	1.95	1.04	2.87	2.54	2.13	1.99	1.27	1.73	1.81	0.33	3.67	2.68	3.04	3.19	4.56	4.93	7.32	3.41	6.28	4.53	5.73	5.15	4.68	4.31	3.26	4.7	2.41	2.6	2.59	3.95
59035	Carm1	1.01	0.63	1.25	0.55	0.3	0.8	0.34	0.3	0.25	0.4	0.3	0.22	0.69	0.29	0.27	0.48	0.26	0.44	0.29	0.15	0.26	0.24	0.14	0.09	0.16	0.23	0.06	0.13	0.11	0.08	0.09	0.01	0.08	0.17	0.07	0.06	0.68	0.08	0.05	0.05	0.02	0.07	0.03	0.07	0.04
68732	Carmil1	0	0.01	0.05	0.02	0.02	0.01	0.01	0.02	0.01	0	0.01	0.01	0.01	0	0.02	0.01	0.02	0.03	0.07	0.05	0.01	0.01	0.09	0.05	0.29	0.05	0.05	0.02	0.08	0.01	0.04	0.01	0.07	0	0.01	0	0	0	0	0	0	0	0	0	0
67383	Carnmt1	0.31	0.24	0.56	0.24	0.22	0.16	0.24	0.17	0.11	0.11	0.13	0.08	0.16	0.24	0.16	0.12	0.14	0.09	0.43	0.11	0.03	0.35	0.17	0.06	0.07	0.14	0.06	0.1	0.09	0.06	0.06	0.11	0.06	0.1	0.06	0.01	0.04	0.09	0.04	0.05	0.06	0.22	0.02	0.07	0.08
107239	Carns1	0	0	0	0	0	0	0	0	0	0	0	0	0	0	0	0	0	0	0	0	0	0	0	0	0	0	0	0	0	0	0	0	0	0	0	0	0	0	0	0.05	0	0	0	0	0
27267	Cars	0.86	0.99	1.02	0.89	0.88	1	0.93	0.73	0.84	0.45	0.81	0.93	0.86	0.81	0.73	0.62	0.71	0.99	1.04	1.09	0.74	0.38	0.57	0.78	1.77	1.32	1.32	1.5	1.4	2.07	2.17	1.91	1.16	0.64	2.66	3.35	1.45	1.81	1.49	1.93	0.97	1.74	1.2	1.39	0.56
71941	Cars2	0.01	0.01	0	0.01	0.11	0.01	0.01	0.01	0.01	0.01	0.01	0.4	0.01	0.01	0.01	0.13	0.01	0.01	0.03	0.01	0.08	0.01	0.02	0.14	0.3	0.01	0.14	0.01	0	0.01	0.02	0	0.01	0.04	0	0.04	0.06	0.02	0.15	0.13	0.05	0.03	0.05	0.09	0.17
192160	Casc3	0.01	0.02	0.06	0.01	0.02	0.01	0.02	0.04	0.01	0.01	0.01	0.03	0.06	0.01	0	0.02	0.02	0.01	0.02	0	0.05	0	0.01	0.01	0.04	0.01	0.01	0.01	0	0	0.36	0	0.01	0	0	0	0	0	0	0	0	0	0	0	0
319996	Casc4	0	0.27	0	0	0.18	0.09	0.2	0.06	0.15	0.02	0.01	0.03	0.01	0.2	0.17	0	0.02	0	0.04	0	0.03	0	0	0.01	0	0	0.02	0.16	0	0.01	0	0.06	0	0	0	0.19	0	0	0	0	0	0	0	0	0
213819	Casd1	0	0	0	0	0	0	0	0	0	0	0	0	0	0	0	0	0	0	0	0	0	0	0	0	0	0	0	0	0	0	0	0	0	0.01	0	0	0	0	0	0	0	0	0	0	0
12361	Cask	0	0	0	0	0	0	0	0	0	0	0.01	0	0	0	0.02	0	0	0.07	0.01	0.02	0.01	0	0.06	0.06	0.02	0.04	0.09	0.01	0.11	0.06	0.13	0.19	0.21	0.08	0.05	0.35	0.07	0.08	0.06	0.08	0.02	0.04	0.25	0.27	0.1
268932	Caskin1	0	0	0	0	0	0.01	0	0.02	0	0.04	0	0	0	0	0	0	0	0	0	0	0	0	0	0	0	0	0	0	0	0	0	0	0	0	0	0	0	0	0	0	0	0	0	0	0
140721	Caskin2	0	0	0	0	0	0.02	0	0.02	0	0.01	0.03	0	0	0	0	0	0.01	0	0	0	0	0	0	0	0.08	0	0	0	0	0	0	0	0.01	0	0	0	0	0	0	0	0	0	0	0	0
12362	Casp1	0	0	0	0.01	0	0.02	0	0	0.01	0.01	0	0.1	0	0	0.02	0.01	0	0.02	0.03	0.04	0.01	0	0.14	0.01	0.02	0.19	0.02	0.11	0.05	0.17	0.04	0.09	0.06	0	0.04	0	0	0	0	0	0	0.01	0	0.01	0
12366	Casp2	0.04	0.02	0.04	0.02	0.05	0.07	0.31	0.07	0.04	0.02	0.62	0.04	0.02	0	0	0	0.12	0	0	0	0	0	0	0	0	0	0	0.02	0.01	0.01	0	0	0.03	0	0	0	0	0	0	0	0	0	0	0	0
12367	Casp3	5.57	3.75	7.37	3.58	3.62	4	3.17	4.18	3.78	2.54	2.22	3.92	2.26	1.87	1.76	2.01	1.98	1.89	2.21	1.11	1.48	1.25	1.97	1.29	1.28	1.61	0.72	0.73	0.38	0.69	0.79	0.99	0.97	1.23	1.02	0.39	1.04	1.76	0.9	0.71	0.61	0.48	0.68	0.89	1.36
12368	Casp6	1	0.74	1	1.16	0.92	0.39	1.05	0.92	0.63	0.46	0.49	1.05	1.2	0.95	0.82	0.99	1.01	1.08	1.09	0.8	1.07	0.76	1.32	0.9	1.5	1.2	1.74	1.63	1.81	1.58	2.23	1	2.36	0.99	1.5	2.36	1.14	1.67	2.07	1.13	0.57	0.4	0.99	0.58	0.54
12369	Casp7	0.04	0.02	0.12	0.05	0.09	0.08	0.05	0.08	0.04	0.07	0.07	0.06	0.08	0.06	0.02	0.02	0.07	0.14	0.1	0.37	0.09	0.02	0.44	0.1	0.02	0.26	0.09	0.14	0.25	0.48	0.13	2.39	0.21	0.24	0.41	0.16	0.16	0.12	0.06	0.09	0.13	0.15	0.13	0.11	0.11
12370	Casp8	0.12	0.05	0.2	0.49	0.06	0.13	0.08	0.36	0.32	0.15	0.22	0.2	0.27	0.1	0.13	0.04	0.23	0.18	0.19	0.35	0.18	0.43	0.59	0.35	0.96	0.94	0.77	1.5	1.09	2.32	0.95	2.52	1.25	1.17	0.87	1.82	1.12	0.84	1.07	0.32	1.37	0.24	0.49	0.49	0.75
12371	Casp9	0	0.02	0	0	0.01	0.02	0.01	0.02	0	0	0	0.01	0.02	0	0.19	0	0	0.02	0.01	0	0.61	0	0.03	0.04	0	0.01	0.01	0.04	0	0.07	0.13	0.1	0.05	0.04	0.01	0.02	0.01	0	0.01	0	2.75	0	0.05	0	0.01
12373	Casq2	0	0	0	0	0	0	0	0	0	0	0	0	0	0	0	0	0	0	0	0	0	0	0	0	0	0	0	0	0.01	0	0	0	0	0	0	0	0	0	0	0	0	0	0	0	0
12374	Casr	0	0	0	0	0	0	0	0	0	0	0	0	0	0	0	0	0	0	0	0	0	0	0	0	0	0	0	0	0	0	0	0	0.11	0	0	0	0	0	0	0	0	0	0	0	0
12380	Cast	0.04	0.05	1.18	0.35	0.42	0.16	0.39	0.36	0.64	0.06	0.27	0.18	0.14	0.11	0.28	0.35	0.14	0.38	0.07	0.16	0.41	0.06	0.53	1.19	1.52	0.68	0.48	0.04	0.33	0.86	0.13	0.83	0.43	0.45	0.36	0.54	0.1	0.68	0.34	0.67	0.17	0.32	0.46	0.44	0.4
12359	Cat	7.28	6.02	10.28	5.66	7	10.24	7.31	24.02	20.47	14.56	12.44	17.44	13.66	11.33	25.63	22.95	17.81	36.32	55.65	46.78	35.3	46.31	40.44	50.61	118.84	103.72	94.68	129.43	182.63	183.63	139.92	209.11	228.45	338.67	292.15	403.43	404.41	491.21	394.15	506.25	413.01	392.25	349.31	406.65	386.6
76856	Catsper3	0	0	0	0	0	0	0	0	0.01	0	0	0	0	0	0	0	0	0	0	0	0	0	0.02	0	0	0	0	0	0	0	0	0	0	0	0	0	0	0	0	0	0	0	0	0	0
320225	Catsperg1	0	0	0	0	0	0	0	0	0	0	0	0	0	0	0.01	0	0	0	0	0	0	0	0	0	0	0	0	0	0	0	0	0	0	0	0	0	0	0	0	0	0	0	0	0	0
12389	Cav1	0	0	0	0.06	0	0	0	0	0	0	0	0.01	0	0	0	0	0.13	0.13	0.11	0.02	0.07	0.03	0.23	0.03	0.75	0.13	0.13	0.01	0.11	0.1	0.02	0	0.25	0.06	0.04	0.11	0.01	0.22	0	0	0	0	0.01	0.24	0
12391	Cav3	0	0	0	0.07	0	0	0	0	0	0	0	0	0	0	0	0	0	0.11	0.07	0	0.09	0	0.29	0	0	0.15	0	0	0.15	0.13	0	0	0.24	0	0	0.14	0	0	0	0	0	0	0	0	0
19285	Cavin1	0.05	0.14	0.07	0.25	0.18	0.15	0.29	0.18	0.11	0.08	0.21	0.35	0.02	0	0.08	0	0.18	0.17	0.43	0.61	0.17	0.83	1.15	1.19	0.48	0.15	0.76	1.3	0.19	0.22	0.69	0.16	0.41	0.43	0.41	0.18	0.28	0.13	0	0.02	0.04	0.19	0.06	0.03	0.05
20324	Cavin2	0.11	0.02	0.06	0.08	0.34	0.17	0.04	0.16	0.08	0.22	0.34	0.24	0.16	0.41	0.26	0.22	0.53	0.83	0.21	0.71	0.73	0.68	0.81	0.33	0.14	0.83	1.95	0.07	0.88	0.75	0.05	0.14	0.13	0.13	0.14	0.12	0.59	0.15	0.32	0.47	0.05	0.05	2.07	0.35	0.15
109042	Cavin3	0	0	0	0	0	0	0	0	0	0	0	0	0	0	0	0	0	0	0	0	0	0	0	0.02	0	0	0.07	0	0	0.02	0	0	1.25	0	0	1.05	0	0	0	0	0	0	0	0	0.55
12396	Cbfa2t2	0.01	0.01	0	0.01	0	0.01	0	0	0	0	0	0	0	0	0	0	0	0	0	0	0	0	0	0	0	0	0	0	0	0	0	0	0	0	0	0	0	0	0	0	0	0	0	0	0
12398	Cbfa2t3	0.02	0.01	0.11	0.01	0.04	0.02	0	0	0.06	0.01	0	0	0	0.01	0.02	0	0	0	0	0	0	0	0	0	0	0	0	0	0	0	0	0	0	0	0	0	0	0	0	0	0	0	0	0	0
12400	Cbfb	0.76	0.33	1.07	0.24	0.28	0.58	0.09	0.26	0.18	0.28	0.36	0.25	0.27	0.15	0.07	0.43	0.29	0.22	0.78	0.85	0.27	0.93	0.18	0.14	1.32	0.22	0.27	1.71	0.08	0.16	0.22	0.73	0.53	0	0.04	0.15	1.04	0.09	0.11	0	0.06	0.02	0	0.01	0.04
12402	Cbl	0.11	0.07	0.11	0.03	0.07	0.15	0.01	0.03	0.06	0.14	0.06	0.02	0.1	0.03	0.03	0.02	0.05	0.05	0.02	0	0.03	0	0.03	0.02	0.02	0.01	0.04	0.02	0.02	0.02	0	0.05	0.1	0.06	0.02	0	0	0	0	0	0	0	0.01	0	0
208650	Cblb	0.01	0.02	0.02	0.01	0	0.02	0.02	0	0	0.01	0	0.01	0	0	0	0	0	0	0.02	0	0	0	0	0.04	0	0	0	0	0	0.01	0	0	0.02	0	0	0	0	0	0	0	0	0	0	0	0
80794	Cblc	0	0	0	0	0	0	0	0	0	0	0	0	0	0	0	0	0	0	0	0	0	0	0	0	0	0	0	0.21	0	0	0	0	0	0	0	0	0	0	0	0	0	0	0	0	0
104836	Cbll1	0	0.04	0.04	0.03	0.05	0.02	0	0.03	0	0.08	0.03	0	0.14	0	0	0	0	0	0	0	0	0.03	0	0	0	0	0	0	0	0	0	0	0	0	0	0	0.16	0	0	0	0	0	0	0	0
12408	Cbr1	0.94	1.18	3.1	0.94	1.46	1.44	1.53	1.39	1.43	1.04	1.09	1.28	0.88	1.05	2.81	1.91	1.39	4.36	6.27	6.7	3.8	10.92	20.38	12.84	47.56	23.75	36.93	30.51	37.76	40.51	94.33	64.38	35.95	57.46	45.1	50.99	56.96	48.28	59.86	39.15	19.23	24.31	14.86	16.11	16.72
109857	Cbr3	0.01	0.03	0.06	0.06	0.03	0.06	0	0.04	0.1	0	0	0	0	0	0	0	0.06	0.22	0.16	0.36	0	0.22	0.65	1.43	2.64	1.83	3.68	0.91	0.65	2.45	2.65	3.54	0.86	2.61	1.67	2.24	3.95	2.92	1.81	0.92	2.49	0.7	0.6	0.51	0.82
234309	Cbr4	1.05	0.01	0.55	0.71	1.64	0.5	0.57	2.33	0.57	0.26	0.51	0.5	1.33	0.69	0.71	2	2.05	2.99	1.92	0.83	0.71	3.58	3.49	1.41	5.05	4.85	2.76	8.39	4.92	11.54	14.06	11.6	15.26	13.06	11.43	13.29	8.03	13.44	7.46	4.25	5.3	4.41	5.88	7.19	4.66
12411	Cbs	0.05	0.03	0	0.08	0.21	0.03	0.44	2.26	1.27	1.14	1.38	1.63	1.07	0.43	4.02	2.76	2.21	10.67	6.31	8.07	3.96	5.5	7.85	5.88	11.81	11.27	8.96	7.33	8.79	11.45	18.14	9.39	6.77	14.39	15.65	14.37	29.35	25.48	21.18	22.91	16.09	17.52	12.02	13.44	13.86
226043	Cbwd1	0.09	0.05	0.07	0.07	1.67	1.52	0.07	0.05	0.1	0.02	1.45	1.84	0.02	0.07	0.02	0.08	0.01	1.99	0	0.05	2.03	0.02	0.11	0.16	0.05	0.11	1.53	0.02	0.07	1.51	0.11	0.06	0.12	0.06	0.03	0.25	0.04	0.03	0	0.02	0.05	0.02	0.01	1.46	1.55
12412	Cbx1	6.96	2.52	10.72	3.24	7.87	8.35	3.43	6.56	4.99	3.1	2.98	5.4	6.15	2.21	4.61	3.76	3.23	6.24	1.61	3.16	4.92	4.9	4.21	3.41	4.87	6.61	4.91	3.73	1	4.62	1.86	2.82	4.06	3.73	5.47	3.43	1.14	4.81	3.12	1.81	1.19	1.12	0.15	1.5	1.7
12417	Cbx3	12.69	7.89	9.99	7.14	10.19	11.69	7.61	7.51	8.32	5.89	5.16	7.04	8.15	5.14	6.27	5.4	6.25	8.52	2.46	4.08	5.02	4.97	4.86	3.54	6.09	7.98	4.63	5	2.16	4.24	4.25	5.68	4.72	3.29	5.67	3.7	2.61	2.37	2.22	0.25	1.67	0.42	1.26	1.11	1.3
12419	Cbx5	6.52	4.89	12.84	5.29	7.83	6.46	4.26	6.28	6.97	4.32	3.97	4.34	3.8	4.26	2.73	3.1	2.13	4.1	2.32	2.43	2.76	1.3	1.35	2.46	1.5	3.53	2.87	3.13	0.5	1.78	0.3	1.67	1.87	2.97	0.49	0.5	0.16	0	0.3	0	0	2.18	0.02	0	0.16
494448	Cbx6	0	0	0	0	0	0	0.01	0	0	0	0	0	0	0.01	0	0	0	0.02	0	0	0	0	0.01	0	0	0.01	0	0	0.01	0.01	0	0.01	0	0	0.01	0	0	0	0	0	0	0	0	0	0
30951	Cbx8	0	0	0.01	0	0	0	0	0	0	0	0	0	0	0	0	0	0	0.02	0	0	0	0	0	0	0	0	0.12	0	0	0.01	0	0	0	0	0	0	0.33	0	0	0	0	0	0	0	0
212139	Cc2d1a	0.02	0.03	0.01	0.01	0.01	0.03	0	0.15	0	0	0	0.07	0	0	0	0	0.01	0	0.01	0	0	0	0	0.12	0	0.01	0.03	0	0	0	0.12	0	0.15	0.07	0.03	0	0.08	0	0	0	0	0	0	0	0
319965	Cc2d1b	0.07	0.01	0.04	0.11	0.09	0.02	0.19	0.08	0.05	0.02	0.06	0.09	0.02	0.02	0.13	0	0	0.04	0.05	0.06	0.1	0.01	0.11	1.28	0.11	0.02	0.11	0.02	0.06	0.2	0.12	0	0	0	0.01	0.01	0	0	0	0	0	0	0	0	0
668310	Cc2d2b	0	0	0	0.02	0	0	0	0	0	0	0	0	0	0	0	0	0	0	0	0	0	0	0	0	0	0	0	0	0	0	0	0	0	0	0	0	0	0	0	0	0	0	0	0	0
67500	Ccar1	0.5	0.32	1.68	0.48	1.51	0.77	0.49	0.49	0.63	0.34	0.42	0.83	0.47	0.35	0.48	0.74	0.33	0.6	0.22	0.4	0.51	0.36	0.59	0.48	1.51	0.89	0.48	0.27	0.36	0.74	0.43	0.73	0.71	0.61	0.36	0.56	0.28	0.49	0.78	0.22	0.38	0.15	0.32	0.21	0.21
234582	Ccdc102a	0.01	0	0	0	0	0.01	0	0	0	0	0	0	0	0	0	0	0	0.02	0	0	0	0	0	0	0	0	0	0	0.01	0	0	0	0	0.07	0.01	0	0	0	0	0	0	0	0	0	0
211535	Ccdc114	0	0	0.04	0	0	0	0	0	0	0	0	0	0	0	0	0	0	0	0	0	0	0	0	0	0.08	0	0	0.06	0	0	0	0	0	0	0	0	0	0	0	0	0	0	0	0	0
69668	Ccdc115	0.12	0.18	0.76	0.08	0.21	0.23	0.06	0.28	0.29	0.17	0.02	0.4	0.11	0.01	0.04	0.08	0.12	0.02	0.27	0.22	0.06	0.13	0.18	0.25	0.18	0.21	0.11	0.19	0.22	0.15	0.11	0.2	0.3	0.08	0.09	0.02	0.01	0	0.01	0.04	0.01	0.07	0.04	0.08	0.08
104479	Ccdc117	0.05	0.09	0.12	0	0.06	0.06	0	0.02	0.08	0	0	0.04	0.01	0	0.01	0.03	0.03	0.04	0	0	0	0	0	0	0	0	0.01	0	0	0	0	0	0.05	0	0	0	0.02	0.05	0.06	0	0	0	0	0	0
72654	Ccdc12	0	0.06	0.9	0.02	0.33	0.14	0.15	0	0.22	0	0.12	0.12	0.16	0.65	0	0	0.16	0.09	0.03	0.05	0	0	0.11	0.12	0	0.12	0	0	0	0.13	0.15	0	0	0.25	0.05	0	0	0	0	0	0	0	0	0	0
54648	Ccdc120	0	0	0	0.02	0	0	0	0	0	0	0	0	0	0	0	0	0	0	0	0	0	0	0	0.01	0	0	0	0	0	0	0	0	0	0	0	0	0	0	0	0	0	0	0	0	0
403180	Ccdc121	0	0	0	0	0	0	0	0	0	0	0	0	0	0	0	0	0	0	0	0	0	0	0	0	0	0	0	0	0	0	0	0	0	0	0	0	0	0.04	0	0	0	0	0	0	0
234388	Ccdc124	0.59	0.25	2.05	2.63	2.13	0.93	1.08	0.38	1.06	0.28	1.37	1.07	0.09	1.06	0.51	0.17	1.01	0.18	0.12	1.14	0.14	0.1	0.34	0.18	0.71	0.48	1.28	0.54	0.1	0.12	0.29	0	2.54	0.1	0.9	1.6	0.7	1.66	2.07	0.36	0.72	0.55	2	3.36	2.94
76041	Ccdc125	0	0	0	0	0	0.01	0	0	0	0	0	0	0	0	0	0	0	0	0	0	0	0	0	0	0	0	0	0	0	0	0	0	0	0	0	0	0	0	0	0	0	0	0	0	0
57895	Ccdc126	0	0	0	0	0	0	0	0	0	0	0	0.01	0	0.01	0.01	0	0.01	0.02	0	0	0	0	0	0	0.03	0	0	0	0	0	0	0	0.05	0	0	0	0	0	0	0	0	0	0	0	0
67433	Ccdc127	0	0	0	0	0	0	0	0	0	0	0	0	0.06	0.06	0	0	0	0.1	0.11	0.13	0	0	0.22	0	0.07	0	0.02	0.04	0.29	0	0.33	0	0	0	0.01	0	0	0.03	0	0	0	0.13	0.18	0	0
76457	Ccdc134	0.05	0.02	0	0.16	0.02	0.01	0.07	0.04	0	0	0.02	0.03	0.01	0	0	0	0.01	0.08	0.01	0.04	0	0	0	0	0.11	0	0.02	0	0.01	0	0.02	0	0	0	0.01	0.01	0.02	0	0.03	0	0.09	0	0.03	0.01	0.01
232664	Ccdc136	0	0	0	0	0	0	0	0	0	0	0	0	0	0.01	0	0	0	0	0	0	0	0	0	0	0	0	0	0	0	0	0	0	0	0	0	0	0	0	0	0	0	0	0	0	0
67291	Ccdc137	0	0.2	0.12	0.17	0	0.06	0.01	0.03	0.04	0	0.02	0.01	0	0.02	0	0	0.01	0.01	0	0	0	0	0.25	0.06	0	0.18	0	0	0.05	0.08	0	0	0.12	0.11	0	0.02	0	1.51	0	0	0.12	0	0.07	0	0
545428	Ccdc141	0	0	0	0	0	0	0	0	0	0	0	0	0	0	0	0	0	0	0	0	0	0	0	0	0	0	0	0	0	0	0	0	0.03	0.01	0	0	0	0	0	0	0	0	0	0	0
241943	Ccdc144b	0	0	0	0	0	0	0	0	0	0	0	0	0	0	0	0	0	0	0	0.02	0	0	0	0	0	0	0	0	0.05	0	0	0	0	0	0	0	0	0	0	0.07	0	0	0	0	0
207209	Ccdc154	0	0	0	0	0	0	0	0	0	0	0	0	0	0	0	0	0	0	0	0	0	0	0	0	0	0	0	0	0	0	0	0	0	0	0	0	0	0	0	0	0.25	0	0	0	0
384619	Ccdc155	0	0	0	0	0	0	0	0	0	0	0	0	0	0	0	0	0	0	0	0	0	0	0	0	0	0	0	0	0	0.02	0	0	0	0	0	0	0	0	0	0	0	0	0	0	0
320696	Ccdc158	0	0	0	0	0	0	0	0	0	0	0	0	0	0	0	0	0	0	0	0	0	0	0	0	0.02	0	0	0	0	0	0	0	0	0	0	0	0	0	0	0	0	0	0	0	0
67119	Ccdc159	0	0	0	0	0	0	0	0	0	0	0	0	0	0	0	0	0	0	0	0	0	0	0	0	0	0	0	0	0	0	0	0	0	0	0	0	0	0	0	0	0.06	0	0	0	0
68597	Ccdc167	0.27	0.41	0.36	0.27	0.32	0.29	0.07	0.37	0.37	0.07	0.12	0.8	0	0.21	0	0.09	0.19	0.83	0	0.25	0	0.25	0.07	0.6	0.81	0.42	0.69	0.11	1.04	0.16	0.06	1.1	0.57	0.87	0.33	1.27	0.64	0.73	0.47	0.1	0	0.54	0.35	0.29	0.23
320604	Ccdc169	0	0	0	0	0	0	0	0	0	0	0	0	0	0	0.01	0	0	0	0	0	0	0	0	0	0	0	0	0	0	0	0	0	0	0	0	0	0	0	0	0	0	0	0	0	0
100504234	Ccdc170	0	0	0	0	0	0	0	0	0	0	0	0	0	0	0	0	0	0	0	0	0	0	0	0	0	0	0	0	0	0	0	0	0	0	0	0.02	0	0	0	0	0	0	0	0	0
320226	Ccdc171	0	0	0	0	0	0	0	0	0	0	0	0	0	0	0	0	0	0	0	0	0	0	0	0	0	0	0.01	0	0	0	0	0	0	0	0	0	0.07	0	0	0	0	0	0	0	0
232236	Ccdc174	0	0	0	0	0	0	6.83	0	0	0	0	0	0	0	0	0	0	0	0	0	0	0	0	0	0	0	0	0	0	0	0	0	0	0	0	0	0	0	0	0	0	0	0	0	0
70950	Ccdc178	0	0	0	0	0	0	0	0	0	0	0	0	0	0	0	0	0	0	0	0	0	0	0	0	0	0	0	0	0	0	0.03	0	0	0	0	0	0	0	0	0	0	0	0	0	0
73254	Ccdc18	0	0	0	0	0	0	0	0	0	0	0	0	0	0	0	0	0	0	0	0	0	0	0	0	0	0	0	0	0	0	0	0	0	0	0	0.01	0	0	0	0	0	0	0	0	0
213993	Ccdc186	0.01	0	0	0	0	0.01	0	0	0	0	0	0	0.01	0	0	0	0	0	0	0	0	0	0	0	0	0	0	0.01	0	0	0	0	0	0	0	0	0	0	0	0	0	0	0	0	0
54638	Ccdc22	0.17	0.18	0.32	0.31	0.24	0.17	0.16	0.12	0.16	0.17	0.26	0.16	0.22	0.28	0.16	0.17	0.15	0.2	0.12	0.1	0.18	0.14	0.25	0.23	0.32	0.42	0.25	0.56	0.49	0.26	0.3	0.67	0.37	0.9	0.47	0.26	0.29	0.31	0.31	0.34	0.43	0.25	0.63	0.39	0.47
381546	Ccdc24	0	0	0	0	0	0	0	0	0	0	0	0	0	0	0	0	0	0	0	0	0	0	0	0	0.03	0	0	0	0	0	0	0	0	0	0	0	0	0	0	0	0	0	0	0	0
67179	Ccdc25	1.31	0.56	1.69	0.45	0.91	0.56	0.31	1.12	0.35	0.78	0.45	0.76	0.87	0.6	0.22	0.51	0.84	1.02	0.59	0.52	0.79	1.92	0.49	0.41	0.44	0.85	0.8	0.8	1.19	1.24	1.31	0.89	0.55	0.88	2.05	2.26	0.85	1.16	1.42	0.5	2.55	0.85	1.78	1.81	1.24
381580	Ccdc27	0	0	0	0	0	0	0	0	0	0	0	0	0	0	0	0	0	0	0	0	0	0	0	0	0	0	0	0	0	0	0	0	0	0	0	0	0	0	0	0	0	0	0	0	0.02
74186	Ccdc3	0	0	0	0	0	0	0	0	0	0	0	0	0	0	0	0	0	0	0	0	0	0	0	0	0	0	0	0	0	0.13	0	0	0	0	0	0	0	0	0	0	0	0	0	0	0
73332	Ccdc30	0	0	0.02	0	0	0	0	0.03	0	0	0.02	0	0	0	0	0	0.04	0	0	0	0	0	0	0.08	0	0	0.09	0	0.59	0	0	0	0	0	0.64	0.38	0.08	0.29	0.31	0.39	0.88	0.34	0.16	0	0
269336	Ccdc32	0	0	0.03	0	0.04	0.23	0	0	0.03	0	0.03	0	0	0.03	0	0	0	0	0	0	0	0	0	0	0	0	0	0	0	0	0	0	0	0	0	0	0	0	0	0	0	0	0	0	0
382077	Ccdc33	0	0	0	0	0.03	0	0	0	0	0	0	0	0	0	0	0	0	0	0	0	0	0	0	0	0	0	0	0	0	0	0	0	0	0	0	0	0	0	0	0	0	0	0	0	0
52715	Ccdc43	0.18	0.19	0.34	0.08	1.06	0.4	0.09	0.38	0.75	0.11	0.13	0.11	0.1	0.14	3.93	0.07	0.03	3.31	0.04	0.49	0.93	0.09	0.08	0.64	0.01	0.03	0.45	0.02	0	0.2	0.04	0.15	0.89	0.26	0.06	0.7	0.07	0.98	0.9	0	0.17	0.05	0.52	0.15	0.5
67163	Ccdc47	0.12	0.41	0.24	0.42	0.25	0.25	0.2	0.11	0.15	0.21	0.24	0.17	0.26	0.33	0.31	0.37	0.23	0.61	0.72	0.47	0.38	0.41	0.54	0.88	1.33	1.35	0.89	1.44	1.05	1.76	2.43	1.75	1.79	0.8	2.1	1.75	1.1	1.41	2.21	2.58	1.84	1.75	1.37	2.64	1.65
67501	Ccdc50	0.24	0.14	0.18	0.18	0.13	0.14	0.04	0.1	0.4	0.03	0.05	0.29	0	0.05	0.11	0.04	0.09	0.08	0.02	0.18	0.1	0.13	0.07	0.07	0.04	0.03	0.07	0.11	0.02	0.24	0.21	0.29	0.16	0.41	0.11	0.29	0	0.22	0.15	0	0.13	0.01	0.02	0.05	0.15
66658	Ccdc51	0.06	0.14	0.17	0.14	0.19	0.36	0.27	0.23	0.36	0.12	0.12	0.1	0.07	0.07	0.08	0.23	0.08	0.22	0.13	0.04	0.14	0.13	0.1	0.26	0.14	0.38	0.35	0.28	0.26	0.32	0.33	0.33	0.4	0.53	0.5	0.39	0.13	0.51	0.5	0.17	0.15	0.31	0.24	0.26	0.34
381045	Ccdc58	1.55	1.05	1.47	1.25	1.03	0.72	0.83	1.12	1.03	1.17	0.75	1.08	0.92	0.81	1.62	1.6	1.35	3.21	1.67	2.44	3.43	3.37	3.8	3.1	3.86	6.45	4.86	5.54	2.73	8.98	6.88	10.61	3.81	4.39	3.87	10.03	2.35	5.01	5.53	3.96	6.15	3.72	15.81	2.48	15.23
76551	Ccdc6	0.15	0.11	0.37	0.06	0.13	0.25	0.09	0.14	0.1	0.06	0.07	0.25	0.04	0.06	0.63	0.27	0.1	0.22	0	0.15	0.08	0.07	0.08	0.56	0.07	0.12	0.61	0.02	0.01	0.13	0.01	0.01	0.04	0.09	0.05	0.28	0.08	0.03	0.04	0.01	0.02	0.01	0.11	0.01	0.02
232933	Ccdc61	0	0	0.02	0	0	0	0	0	0	0	0	0	0	0	0	0	0	0	0	0	0	0	0	0	0	0	0	0	0	0	0	0	0	0	0	0	0	0	0	0	0	0	0	0	0
208908	Ccdc62	0	0	0	0	0	0	0	0	0.01	0	0	0	0	0	0	0	0	0	0	0	0	0	0	0	0	0	0	0	0	0	0	0	0	0	0	0	0	0	0	0	0	0	0	0	0
105833	Ccdc65	0	0	0	0	0	0	0	0	0	0	0	0.02	0	0	0	0	0	0	0	0	0	0	0	0	0	0	0	0	0	0	0	0	0	0	0	0	0	0	0	0	0	0	0	0	0
320234	Ccdc66	0	0	0	0	0.19	0	0	0.12	0	0	0	0	0	0	0	0	0	0	0	0	0	0	0	0	0	0	0	0	0	0	0	0	0	0	0	0	0	0	0	0	0	0	0	0	0
72123	Ccdc71l	0.08	0.06	0.01	0.05	0.05	0.1	0.04	0	0	0.01	0.05	0	0.05	0	0	0	0.02	0	0	0.01	0	0	0	0	0	0	0	0	0	0	0	0	0	0	0	0	0	0	0	0	0	0	0	0	0
67200	Ccdc77	0.05	0.01	0.02	0	0	0	0	0	0	0	0	0	0	0	0	0	0	0	0	0	0	0	0	0	0	0	0	0	0	0	0	0	0	0	0	0	0	0	0	0	0	0	0	0	0
67896	Ccdc80	0	0	0	0	0	0	0.59	0	0	0	0	0	0.05	0	0	0.04	0	0	0	0	0	0	0	0	0	0	0	0	0	0	0	0	0	0	0	0	0	0	0	0	0.03	0	0	0	0
66396	Ccdc82	0	0	0	0	0	0	0	0	0	0	0	0	0	0	0	0	0	0	0	0	0	0	0	0	0	0	0	0	0	0	0	0	0.01	0	0	0	0	0	0	0	0	0	0	0	0
668158	Ccdc85c	0.03	0	0.27	0	0.01	0.03	0	0.02	0.01	0	0.01	0	0	0	0	0	0	0.12	0	0.03	0	0	0.01	0.07	0	0	0.19	0	0	0.13	0.01	0	0.01	0	0	0	0.01	0	0.01	0	0	0	0.01	0.04	0
108673	Ccdc86	0.66	0.62	0.53	0.61	0.18	0.92	0.18	0.09	0.2	0.26	0.13	0.03	0.29	0.15	0.02	0.15	0.06	0	0.02	0.04	0.03	0	0.09	0.11	0.2	0.13	0.04	0.06	0	0.04	0	0	0	0	0.03	0	0	0	0	0	0	0	0	0	0
108686	Ccdc88a	0	0	0	0	0.01	0	0.02	0.3	0.29	0	0	0.01	0	0	0	0	0	0	0	0	0	0	0	0	0	0	0	0	0	0	0	0	0	0	0	0	0	0	0	0	0	0	0	0	0
78317	Ccdc88b	0	0	0	0	0	0	0	0.03	0.02	0	0	0.12	0	0	0.2	0	0.01	0	0	0.01	0.08	0	0	0	0	0	0.01	0	0	0.01	0	0	0	0	0	0	0	0	0	0	0	0	0	0	0
68339	Ccdc88c	0	0	0.01	0	0	0	0	0	0	0	0	0	0	0	0	0	0	0	0	0	0	0	0	0.04	0	0	0	0	0	0	0	0	0	0	0	0.05	0	0	0	0	0	0	0	0	0
243846	Ccdc9	0.1	0.3	0.29	0.16	0.34	0.23	0.11	0.13	0.08	0.38	0.05	0.33	0.07	0.09	0.11	0.34	0.05	0.35	0.37	0	0.36	0.36	0	0.05	0.17	0.07	0.04	0.38	0.19	0	0.05	0.77	0	0.05	0.15	0	0.14	0.25	0.3	0	0	0.09	0.08	0.03	0
66365	Ccdc90b	0.02	0	0.03	0.01	0.01	0.09	0.01	0.19	0.14	0	0.23	0.01	0.03	0	0.04	0	0.01	0.07	0	0.36	0.18	0.01	0.02	0	0.11	0.05	0.08	0.04	0.77	0	0.01	0.06	0.59	0.15	0.15	0.21	0	0.14	0.06	0.1	0	0.04	0.08	0.62	0
67015	Ccdc91	0	0	0	0	0	0	0	0	0	0	0	0	0	0	0	0	0	0	0	0	0	0	0	0	0	0	0	0	0	0	0	0.02	0	0	0.01	0	0.01	0	0	0	0	0	0	0	0
215707	Ccdc92	0	0	0	0	0	0.04	0	0.07	0.06	0	0.01	0	0	0	0	0	0	0.09	0	0	0	0	0	0	0	0	0	0	0	0	0	0	0	0	0	0	0	0	0	0	0	0	0	0	0
70829	Ccdc93	0.01	0.02	0.02	0.08	0.07	0.01	0.1	0.06	0.03	0	0.01	0.07	0	0.02	0.1	0.11	0.06	0.08	0	0.11	0.06	0.01	0.63	0.15	0.07	0.82	0.23	0.12	0.96	0.06	0.14	0.14	0.43	0.15	0.19	0.12	0.12	0.12	0.08	0.03	0.05	1	0.11	0.22	0.37
52132	Ccdc97	0.08	0.02	0.06	0.01	0.07	0.1	0.06	0.04	0.05	0	0.01	0.04	0.03	0.07	0.01	0	0.02	0.05	0	0.01	0	0.01	0.08	0.04	0.03	0.02	0.02	0.01	0.01	0.08	0.05	0.02	0.01	0.02	0	0	0.01	0	0	0	0	0	0	0.01	0.01
214239	Ccdc9b	0	0.01	0	0	0	0	0	0	0	0	0	0	0	0	0	0	0	0	0	0	0	0	0	0	0	0	0	0	0	0	0	0	0	0	0	0	0.03	0	0	0	0	0	0	0	0
240084	Cchcr1	0	0	0	0	0.01	0	0	0	0	0	0	0	0	0.01	0	0	0	0	0	0	0	0	0	0	0	0	0	0	0	0	0	0	0	0	0	0	0	0	0	0	0	0	0	0	0
216527	Ccm2	0.02	0.01	0.03	0.04	0.04	0.03	0.03	0.02	0.06	0	0.02	0.04	0.01	0.04	0.01	0.01	0.02	0.01	0	0.04	0.03	0.01	0.02	0.03	0.14	0.04	0.08	0.09	0.01	0	0	0.02	0.01	1.67	0.06	0	1.12	0.15	0	0.95	0	0	0.02	0.05	0
12427	Ccna1	0.03	0	0	0.01	0.01	0	0	0	0	0	0	0	0.01	0	0	0	0	0	0	0	0	0	0	0	0	0	0	0	0	0	0	0	0	0	0	0	0	0	0	0	0	0	0	0	0
12428	Ccna2	0.52	0.01	0.35	0.22	0.22	0.2	0.18	0.05	0.35	0.04	0.06	0.09	0.19	0.19	0.01	0.06	0.01	0	0.01	0.01	0	0	0	0	0	0	0.46	0	0	0	0	0	0	0	0	0	0	0	0	0	0	0	0	0	0
268697	Ccnb1	0.03	0.05	0.09	0.09	0.05	0.01	0.03	0.04	0	0	0.01	0.02	0	0.01	0	0.06	0	0	0.03	0	0	0	0	0	0	0	0	0	0	0	0	0	0	0	0	0	0	0	0	0	0	0	0	0	0
239083	Ccnb1ip1	0	0	0	0	0	0	0	0	0	0	0	0	0	0	0	0	0	0	0	0	0	0	0	0	0	0	0	0	0	0	0	0	0	0	0	0	0	0	0	0	0	0	0	0.19	0
12442	Ccnb2	0	0.11	0.01	0.02	0	0	0.02	0	0	0	0	0.03	0	0.03	0	0	0	0	0	0	0	0	0	0	0	0	0	0	0	0	0	0	0	0	0	0	0	0	0	0	0	0	0	0	0
51813	Ccnc	0	0	0.09	0	0.01	0.03	0.01	0	0	0	0.1	0	0	0	0	0	0	0	0	0	0	0	0	0	0	0	0	0	0	0	0	0	0	0	0	0	0	0	0	0	0	0	0	0	0
12443	Ccnd1	0.01	0.05	0.19	0.02	0.11	0.02	0	0.01	0.01	0.01	0	0	0	0	0.29	0	0	0	0	0	0	0	0	0	0	0	0	0	0.11	0.02	0.03	0.09	0.01	0	0	0.05	0	0.14	0.01	0	0	0	0	0	0
12444	Ccnd2	0	0.02	0.01	0	0	0	0	0	0	0	0	0	0	0	0	0	0	0	0	0	0	0	0	0	0	0	0	0	0	0	0	0	0	0	0	0	0	0	0	0	0	0	0	0	0
12445	Ccnd3	0.46	0.24	0.16	0.24	0.25	0.41	0.52	0.04	0.06	0	0.33	0.1	0.12	0.06	0.03	0.15	0.04	0.08	0.1	0.05	0.06	0.04	0.13	0.01	0	0.05	0.04	0.08	0.05	0.05	0.01	0.11	0.2	0	0.03	0.01	0	0.01	0.01	0	0	0	0.01	0.01	0
17151	Ccndbp1	0	0	0	0.02	0.03	0.03	0.02	0	0	0	0.02	0.02	0	0.01	0	0.01	0	0	0.02	0.02	0	0.02	0	0	0.1	0.01	0	0	0	0	0	0	0	0	0	0	0	0	0	0	0	0	0	0	0
12447	Ccne1	0	0	0.01	0.04	0.01	0.02	0.01	0	0	0	0	0	0	0	0	0	0	0	0	0	0	0	0	0	0	0	0	0	0	0	0	0	0	0	0	0	0	0	0	0	0	0	0	0	0
66671	Ccnh	0.05	0.13	0.11	0.17	0.21	0.11	0.32	0.12	0.27	0.04	0.33	0.03	0.11	0.06	0.02	0	0.13	0	0	0.03	0.01	0.03	0	0.03	0	0	0.02	1.37	0	0	0	0	0	0	0	0	0	0	0	0	0	0	0.01	0	0
12453	Ccni	0	0	0	0	0	0	0	0	0	0	0	0	0	0	0	0	0	0	0	0	0	0	0	0	0	0	0	0	0	0	0	0	0	0	0	0	0	0	0	0.08	0	0	0	0	0
12454	Ccnk	0	0.02	0.14	0	0.01	0.03	0.24	0	0	0	0.29	0	0.17	0	0.03	0.03	0	0.02	0.04	0	0.01	0	0.02	0.14	0.39	0	0.03	0	0	0	0	0	0	0	0	0	0	0	0	0	0	0	0	0	0
56706	Ccnl1	0	0.03	0.05	0.04	0	0.03	0.03	0	0	0	0.1	0	0	0	0.01	0.01	0	0	0	0	0	0	0	0	0.02	0	0.01	0.03	0	0	0	0	0.03	0	0	0.03	0	0	0	0	0	0	0	0	0
56036	Ccnl2	0	0.06	0.16	0	0.01	0.11	0.15	0	0.03	0	0.01	0.01	0	0.03	0	0	0	0	0.01	0	0.01	0	0	0	0.25	0	0	0	0	0	0	0	0	0	0	0	0	0	0	0	0	0	0	0	0
69109	Ccnq	0	0	0.01	0	0.21	0	0	0	0	0	0	0	0	0	0	0	0	0	0	0	0	0	0	0	0	0	0	0	0	0	0	0	0	0	0	0	0	0	0	0	0	0	0	0	0
12455	Ccnt1	0.02	0.06	0.1	0.03	0.02	0.01	0.01	0.03	0.04	0.04	0.02	0.03	0.08	0.04	0.02	0	0.02	0	0	0	0	0.01	0	0	0	0	0.01	0.02	0.02	0	0	0	0.01	0.02	0.06	0	0.03	0	0	0	0	0	0	0.02	0
72949	Ccnt2	0	0	0	0	0	0.01	0	0	0	0	0	0	0	0	0	0	0	0	0	0.02	0	0	0	0	0	0	0	0	0	0	0	0	0	0	0	0	0	0	0	0	0	0	0	0	0
67974	Ccny	0.04	0.02	0.03	0	0.08	0.07	0.05	0.14	0.05	0.05	0.07	0.11	0.08	0.01	0.06	0.04	0.03	0.03	0.02	0.02	0.02	0.05	0.05	0.28	0.15	0.14	0.29	0.1	0.21	0.12	0.33	0.56	0.38	0.22	0.18	0.24	0.85	0.29	0.13	0.17	0.03	0.21	0.1	0.2	0.14
227210	Ccnyl1	0.01	0	0	0	0	0.01	0	0.02	0	0	0.01	0.01	0	0	0.01	0.01	0.01	0.01	0.01	0	0.01	0	0.01	0	0	0.01	0.03	0.04	0	0	0.02	0.02	0.04	0.02	0.01	0.03	0.01	0.02	0.03	0.01	0.01	0	0.01	0.03	0.01
72278	Ccpg1	0	0	0	0	0	0.04	0	0	0	0	0	0	0	0	0	0	0	0	0	0	0	0	0	0	0	0	0	0	0	0	0	0	0	0	0	0	0	0	0	0	0	0	0	0	0
12772	Ccr2	0	0	0	0	0	0	0	0	0	0	0	0	0	0	0	0	0	0	0	0	0	0	0	0	0	0	0	0	0	0	0	0	0.01	0	0	0	0	0	0	0	0	0	0	0	0
12771	Ccr3	0	0	0	0	0	0	0	0	0	0	0	0	0	0.14	0	0	0	0	0	0	0	0	0	0	0	0	0	0	0	0	0	0	0	0	0	0	0	0	0	0	0	0	0	0	0
12460	Ccs	0.28	0.21	0.45	0.35	0.17	0.04	0.31	0.29	0.32	0.24	0.1	0.18	0.39	0.32	0.52	0.26	0.41	0.93	0.93	5.75	0.72	3.16	1.16	1.8	1.86	2.06	1.41	3.32	3.8	3.45	4.19	3.65	4.36	1.28	3.25	2.81	1.48	3.42	2.3	2.63	0.79	1.31	1.32	1.33	1.22
12461	Cct2	30.49	18.59	45.71	23.15	27.47	25.92	18.55	17.21	22.92	17.68	14.46	18.17	18.96	16.38	19.14	49.16	15.09	24.51	11.86	31.28	17.06	18.54	20.33	20.13	59.83	22.24	21.95	12.98	13.12	21.06	55.02	15.44	14.79	11.89	7.9	13.09	36.55	18.26	15.8	10.88	32.6	9.79	10.32	12.77	12.35
12462	Cct3	23.05	17.74	31.2	14.25	25.42	24.07	12.78	15.45	19.95	15.6	9.65	11.93	16.83	13.35	15.82	17.45	14.96	27.4	14.5	13.22	14.75	12.27	17.37	17.62	25.59	26	19.23	18.77	17.75	20.43	13.25	17.27	16.13	9.86	11.39	11.31	13.76	18.63	15.15	17	13.17	9.9	10.11	11.59	11.79
12464	Cct4	11.07	12.78	16.75	15.14	9.92	10.85	8.69	8.71	7.6	8.81	8.83	8.61	11.81	6.87	8.64	9.8	7.73	9.22	9.64	11.53	6.84	8.67	9.98	7.88	14.67	13.58	8.31	10	10.61	7.71	8.4	11.11	6.18	6.93	6.19	9.2	6.85	8.96	12.31	10.2	8.19	7.37	6.07	7.05	6.21
12465	Cct5	14.89	15.78	27.33	16.8	21.11	18	12.23	12.4	16.91	11.3	11.39	15.52	9.48	9.65	13.81	9.92	8.92	16.21	7.9	15.55	13.01	8.42	17.68	17.57	20.7	21.55	13.89	9.78	8.55	15.61	8.34	15.11	11.56	8.31	8.15	10.12	6.68	16	12.85	10.36	11.45	6.5	6.97	9.61	7.72
12466	Cct6a	14.75	8.39	21.2	10.39	10.33	9.81	7.36	9.05	9.47	7.29	4.56	8.12	5.84	6.1	7.76	4.83	6.54	11.88	8.87	8.74	10.13	5.89	11.95	9.41	13.08	10.44	9.53	7.48	7.26	9.04	8	9.54	8.83	7.82	7.09	8.17	6.26	11.87	10.46	6.43	6.59	7.08	8.16	7.27	7.22
12467	Cct6b	4.15	2.61	3.48	1.82	2.37	2.24	1.03	2.28	2.17	1.59	0.45	1.71	1.59	1.43	1.63	1.6	0.95	2.8	1.47	2.57	2.63	0.87	1.37	1.04	1.97	2.11	1.52	1.32	1.57	1.47	0.67	0.81	1.62	0.75	1.55	1.38	0.5	1.04	1	1.09	1.39	0.7	0.82	0.75	0.78
12468	Cct7	16.87	14.89	23.86	14.76	15.29	16.79	11.33	11.19	13.43	12.79	7.87	13.03	13.59	9.3	12.28	10.96	10.47	16.56	18.35	13.51	12.96	9.42	10.79	13.68	17.16	17.99	18.11	6.9	10.65	20.69	9.87	13.54	17.04	8.01	12.75	11.61	8.87	13.05	13.77	10.18	8.67	5.89	10.42	8.82	10.33
12469	Cct8	20.41	15.32	23.78	14.18	16.05	17.66	10.81	11.79	14.61	13.84	10.66	12.97	15.06	9.23	9.91	12.66	10.47	16.71	10.71	13	9.25	10.61	12.94	9.28	20.04	18.93	16.37	13.76	14.57	12.37	12.58	13.86	10.68	11.88	12.17	10.56	11.75	17.44	15.21	11.34	7.75	10.72	8.54	8.33	11.09
231874	Ccz1	0.03	0.01	0.03	0.01	0.09	0.04	0.03	0.05	0.04	0.02	0.01	0.04	0.04	0	0	0.01	0.02	0.09	0	0.01	0	0.14	0	0.03	0.06	0.03	0.01	0	0.56	0.26	0.09	0.11	0.05	0.86	0.02	0.25	0.51	0.4	0.03	0.14	0.17	0.31	0.69	0.76	0
630146	Cd101	0	0	0	0	0	0	0.06	0	0	0	0	0	0	0	0	0	0	0	0	0	0	0	0	0	0	0	0	0	0	0	0	0	0	0	0	0.04	0.01	0	0	0.01	0	0	0	0	0
12475	Cd14	0	0	0	0	0	0	0	0	0	0	0	0	0	0	0	0	0	0	0	0	0	0	0	0	0	0	0.02	0	0	0.04	0.81	0.03	1.27	0.03	0	0	0	0	0	0	0	0	0	0	0
12476	Cd151	0	0	0	0	0	0.01	0	0	0.01	0.01	0	0.02	0.01	0	0	0	0	0	0	0	0	0	0	0	0	0	0	0	0	0	0.01	0	0	0	0	0	0	0	0	0	0	0	0	0	0
93671	Cd163	0	0	0	0	0	0	0	0	0	0	0	0	0	0	0	0	0	0	0	0	0	0	0	0	0	0	0	0	0.02	0	0.21	0.24	0.04	0.02	0	0	0.05	0.01	0	0	0	0.01	0.02	0.09	0.03
68891	Cd177	0	0	0	0	0	0	0	0.04	0.06	0	0	0.03	0	0	0.28	0.15	0.03	0.11	0.38	0.05	0.2	0.01	0.03	0.03	0	0	0.03	0.01	0.03	0	0	0	0	0	0	0	0	0.04	0	0	0	0	0	0	0
17079	Cd180	0	0	0	0	0.01	0	0	0.01	0.01	0.01	0	0.01	0	0	0	0.01	0	0.01	0.01	0	0	0.01	0.02	0.01	0.02	0.03	0.08	0.02	0.03	0.08	0	0.05	0.08	0.02	0	0	0	0	0	0.03	0	0	0	0.02	0
12479	Cd1d1	0	0	0	0.02	0	0	0.01	0	0.01	0	0	0.01	0	0	0	0	0	0	0.03	0.05	0	0.01	0	0.01	0.03	0.12	0.31	0.09	0.02	0.13	0.1	0.28	0.54	0.06	0.11	0.22	0.07	0.43	0.55	0.43	1.39	0.84	0.63	0.72	0.54
12480	Cd1d2	0	0	0	0	0	0	0	0	0	0	0	0	0	0	0	0	0	0	0	0.01	0	0.01	0	0	0.03	0.01	0.03	0.06	0.01	0.03	0.1	0.03	0.09	0.06	0.1	0.02	0.08	0.14	0.16	0.28	0.57	0.24	0.22	0.23	0.11
70445	Cd248	0	0	0	0	0	0	0	0	0	0	0	0	0	0	0	0	0	0	0	0	0.02	0	0	0	0	0	0	0	0	0	0	0	0	0	0	0	0	0	0	0	0	0	0	0	0
60533	Cd274	0	0	0	0	0	0	0	0	0	0	0	0	0	0	0	0	0	0	0	0	0	0	0	0	0.21	0	0	0	0	0	0	0	0	0	0	0	0	0	0	0	0	0	0	0	0
12488	Cd2ap	0.41	0.14	0.59	0.27	0.15	0.27	0.41	0.15	0.31	0.22	0.14	1.17	0.2	0.11	0.3	0.15	0.1	0.33	0.23	4.21	2.48	3.57	0.23	0.3	0.36	0.59	0.4	0.48	0.32	0.43	0.17	0.62	0.79	0.34	7.1	0.27	0.11	0.36	0.3	0.24	0.09	0.04	0.14	0.1	0.18
70233	Cd2bp2	0.79	0.59	0.68	0.46	0.41	0.32	0.19	0.1	0.22	0.11	0.41	0.29	0.29	0.27	0.24	0.36	0.13	0.12	0.2	0.11	0.02	0.08	0.24	0.03	0.56	0.34	0.17	0.32	0	0.07	0.63	0.64	0.25	0.06	0	0	0.06	0	0	0	0	0.03	0	1.49	1.94
217303	Cd300a	0	0	0	0.01	0	0.01	0.01	0	0.03	0.02	0.03	0	0.01	0	0	0	0.01	0	0.03	0	0	0	0	0.04	0	0	0	0	0.05	0.08	0.02	0.09	0	0	0	0	0	0	0	0	0	0	0	0	0
52685	Cd300lg	0	0	0	0	0	0	0	0	0	0	0	0	0	0	0	0	0	0	0	0	0	0	0	0	0	0	0	0	0	0	0	0	0.68	0	0	0	0	0	0	0	0	0	0	0.46	0.01
66205	Cd302	0	0	0.02	0	0.04	0	0.11	0.07	0.1	0.07	0.05	0.03	0.07	0.1	0.11	0.01	0.05	0.2	0.22	0.4	0.08	0.39	0.51	0.46	1.07	0.96	1.04	0.78	0.63	0.9	1.11	1.69	2.49	1.66	0.73	0.97	0.75	0.91	0.78	0.13	0.24	0.5	0.78	0.23	0.18
12490	Cd34	0.04	0.02	0.02	0.02	0.15	0.04	0.01	0	0	0.02	0	0.03	0.01	0	0	0.04	0	0.05	0	0	0.03	0	0	0	0	0	0	0.02	0.01	0	0	0	0	0	0	0	0	0	0	0	0	0	0	0	0
12491	Cd36	0	0	0	0.07	0.02	0.03	0.09	0.07	0.11	0.43	0.84	0.16	0.92	0.06	0.24	0.34	0.16	0.23	0.13	0.21	0.06	0.36	1.56	0.67	0.8	0.49	0.49	0.9	0.47	0.48	0.72	1.06	0.82	0.79	0.5	0.76	0.85	0.21	0.78	0.43	0.42	0.18	0.44	0.46	0.53
12494	Cd38	0.41	0.04	0.38	0.11	0.01	0.37	0.04	0.07	0.67	0.1	0.1	0.5	0.67	0.56	0.74	0.75	0.81	0.19	0.17	1.14	0.25	0.49	1.08	0.31	0.79	1.34	0.5	1.35	0.65	1.06	2.03	1.58	1.06	1.05	0.96	0.99	1.36	0.59	0.48	0.58	1.19	0.41	0.66	0.85	0.92
70333	Cd3eap	0.12	0.12	0.24	0.03	0.02	0.04	0.02	0	0	0.05	0.02	0	0	0.03	0	0.01	0.04	0.01	0.02	0	0	0.01	0.02	0.01	0	0	0	0	0	0	0	0	0.01	0	0	0	0	0	0	0	0	0	0	0	0
21939	Cd40	0	0	0	0	0	0	0	0	0	0	0	0	0	0	0	0	0	0	0	0	0	0	0	0	0.01	0	0	0	0	0	0	0	0.01	0	0	0	0	0	0	0	0	0	0	0	0
12505	Cd44	0.35	0.56	0.55	0.42	0.22	0.23	0.66	0.41	0.4	0.13	0.37	0.49	0.37	0.58	0.57	0.25	0.45	0.6	0.36	0.26	0.4	0.27	0.43	0.15	0.24	0.33	0.26	0.44	0.1	1.05	0.03	0.74	0.55	0.11	0.08	0	0	0	0.07	0	0	0	0	0.07	0.07
16423	Cd47	1.13	1.29	0.3	0.65	0.84	1.31	1.5	2.27	1.07	1.12	1.13	0.84	1.64	0.5	1.21	1.44	0.92	1.5	0.92	0.65	1.1	1.13	1.42	0.87	1.69	2.1	2.44	1.06	1.03	1.48	2.54	1.3	2.38	1.21	1.71	1.38	0.4	0.97	1.08	0.72	0.12	1.24	0.49	0.4	0.53
12506	Cd48	0.01	0	0	0	0	0	0	0.01	0.06	0.02	0	0.02	0.02	0	0.03	0.02	0.06	0.15	0.03	0.03	0.02	0	0.06	0	0	0	0.04	0	0.04	0	0.05	0.07	0.05	0	0	0	0	0.09	0	0	0	0	0.09	0	0
13136	Cd55	0	0	0	0	0.02	0	0	0	0.01	0	0	0	0	0	0	0	0	0	0	0	0	0	0	0	0	0	0	0	0.05	0	0	0	0	0	0	0	0	0	0	0	0	0	0	0	0
12509	Cd59a	0.06	0	0	0.04	0.04	0	0.09	0.1	0.01	0.09	0.01	0.05	0.04	0.04	0	0.07	0.06	0	0	0.04	0	0.1	0	0	0.11	0.15	0.06	0.07	0	0.2	0.15	0.28	0.22	0.35	0.13	0.17	0.2	0.07	0.1	0.06	0	0	0.11	0.13	0.1
11801	Cd5l	0	0	0	0.06	0.02	0.01	0.09	0.08	0.3	0.25	0.08	0.14	0.11	0.05	0.13	0.02	0.02	0.03	0.06	0.38	0.04	0	0.09	0.04	0.03	0	0.05	0.13	0.08	0.42	0	0.66	0.64	0	0.06	0.01	0.02	0.02	0	0	0.02	0.02	0.13	0	0.18
12512	Cd63	0.06	0.07	0.04	0	0	0.04	0.09	0.1	0	0	0.05	0.12	0.09	0.07	0.06	0.01	0.11	0.16	0.11	0.22	0	0.12	0	0	0	0	0	0.29	0.17	0	0	0	0	0.12	0	0	0	0	0	0	0	0	0	0	0
12514	Cd68	0.1	0.06	0	0	0.02	0	0.08	0.15	0.16	0.3	0.22	0.08	0.07	0.23	0.23	1.04	0.3	0.29	0.26	0.57	0.41	0.49	1.14	0.48	1.84	1.56	0.5	0.65	2.26	1.11	1.53	1.88	1.06	0.77	1.23	0.52	0.47	0.64	0.12	0.14	0.12	0.41	0.07	0.19	0.29
12517	Cd72	0	0	0	0	0	0	0	0	0	0	0	0	0	0	0	0.02	0	0	0	0.01	0	0	0	0	0	0	0	0	0	0	0.02	0	0	0	0	0	0	0	0	0	0	0	0	0	0
16149	Cd74	0	0	0	0	0	0	0	0	0	0	0	0	0	0	0	0	0	0	0	0	0	0	0	0	0	0	0.19	0.04	0	0.22	0.01	0	0	0	0	0	0	0	0	0	0	0	0.02	0	0
12520	Cd81	0.3	0.24	0	0.49	0.02	0.31	0.24	0.39	0	0.07	0.11	0.27	0.17	0.17	0.2	0.26	0.07	0.22	0.22	0.38	0.48	0	0.27	0	0.43	0.33	0.38	1.26	0	0.29	0.85	0.56	1.52	0.35	0.96	2.38	1	2.93	3.73	1.81	0.92	0.78	1.79	0.12	1.14
12521	Cd82	0.17	0.14	0.04	0.31	0.24	0.47	0.43	0.29	0.38	0.49	0.49	0.56	0.43	0.54	0.16	0.37	0.25	0.32	0.49	0.4	0.2	0.32	0.92	0.21	0.43	0.47	0.24	0.24	0.26	0	0.14	0.25	0.32	0.19	0.18	0.18	0.45	0.69	0.4	0.63	0.7	0.41	0.59	0.64	0.37
12523	Cd84	0	0	0	0	0	0.8	0.01	0	0	0	0	0.01	0	0	0	0	0.72	0	0	0	0	0	0	0.02	0	0	0.02	0	0	0.02	0	0	0.02	0	0	0	0	0	0	0	0	0	0	0	0
12527	Cd9	0.09	0.12	0.37	0.48	0.19	0.45	0.76	0.8	0.71	0.82	1.6	0.79	0.8	1.27	1.07	0.62	4.17	3.03	3.08	2.39	2.09	5.59	5.42	4.75	1.58	1.03	3.96	1.77	0.5	1.14	0	0.38	1.37	0.21	0.45	0.15	0.08	0.08	0.14	0	0	0.22	0	0.31	0.24
17064	Cd93	0.03	0.04	0	0.02	0.03	0.05	0.01	0.03	0.04	0	0.06	0.02	0.04	0.03	0.09	0.03	0.07	0.09	0.01	0.05	0.08	0.05	0.05	0.06	0.11	0.04	0.06	0.05	0.03	0.04	0.05	0.08	0.05	0.04	0	0.03	0.01	0	0	0	0	0	0	0	0
171486	Cd99l2	0.02	0	0.15	0.02	0.45	0.55	0.09	0.02	0.02	0.03	0.01	0	0	0.02	0.01	0.02	0.01	0	0.02	0.03	0.59	0	0.06	0.01	0	0.01	0.01	0.03	0.02	0.02	0.06	0.12	0	0.06	0.08	0	0.04	0.04	0	0	0.01	0	0.06	0	0
72269	Cda	0	0	0	0	0.02	0	0	0.01	0	0.03	0.03	0	0.04	0	0	0.08	0.07	0	0	0.23	0.02	0.09	0	0.31	0.07	0.62	0.23	1.3	0.23	1.14	0.66	1.47	2.08	1.41	0.58	2.43	1.69	1.9	1.04	0.44	0.17	0.44	0.01	0.03	0
71891	Cdadc1	0	0	0	0	0	0	0	0	0	0	0	0	0	0	0	0	0	0	0	0	0	0	0	0	0.07	0	0	0.11	0.04	0	0	0	0	0	0.01	0.01	0.02	0	0	0	0	0	0	0.01	0
68968	Cdan1	0.14	0.06	0.02	0.03	0	0.04	0.02	0.01	0.24	0.02	0.02	0.02	0.03	0	0	0.02	0.01	0.01	0.02	0	0.01	0	0	0	0.02	0.01	0.01	0	0	0.01	0.01	0.01	0.01	0	0.01	0	0	0	0	0	0	0	0	0	0
98828	Cdc123	0.49	0.17	0.36	0.43	0.45	0.27	0.28	0.6	0.49	0.09	0.23	0.11	0.19	0.14	0.03	0.06	0.13	0.04	0.05	0.03	0.06	0.02	0.03	0.02	0.3	0.98	0.08	0.1	0.94	0.08	0.17	0.22	0.15	0.25	0.03	0.09	0.2	0.12	0.17	0.01	0.07	0	0.08	0.02	0.05
69957	Cdc16	1.2	1.02	0.66	0.39	0.43	0.58	0.32	0.14	0.23	0.28	0.24	0.19	0.68	0.27	0.16	0.39	0.1	0.12	0.19	0.19	0.2	0.11	0.05	0.09	0.37	0.28	0.1	0.21	0.31	0.05	0.1	0.44	0.05	0.38	0.42	0.07	0.26	0.03	0.05	0.14	0.01	0.07	0.03	0.12	0.06
107995	Cdc20	0.07	0.07	0.08	0.07	0.04	0.06	0.1	0.01	0.02	0.01	0	0.14	0.02	0.02	0	0.01	0.02	0	0.01	0	0	0	0	0	0	0.01	0	0	0.01	0	0	0.01	0	0.01	0	0	0	0	0	0	0	0	0	0	0
238896	Cdc20b	0	0	0	0	0	0	0	0	0	0	0	0	0	0	0	0	0.06	0	0	0	0	0	0	0	0	0	0	0	0	0	0	0	0	0	0	0	0	0	0	0	0.51	0	0	0	0
52563	Cdc23	0.09	0.39	0.52	0.15	0.17	1.17	0.48	0.17	0.6	0.05	0.09	0.09	0.11	0.08	0.02	0.23	0.04	0.09	0.01	0.79	0.47	0.02	0.82	0.05	0.01	0	0.06	0.04	0.74	0	0	0.83	0.02	0.03	0.08	0	0.12	0	0	0	0	0	0.01	0	0
12531	Cdc25b	0	0	0	0	0.08	0	0	0	0	0	0	0	0	0	0	0	0	0	0	0	0	0	0	0	0	0	0	0	0	0	0	0	0	0	0	0	0	0	0	0	0	0	0	0	0
12532	Cdc25c	0	0	0	0	0	0	0	0	0	0	0	0	0	0	0	0	0	0	0	0	0	0	0	0	0	0.01	0	0	0	0	0	0	0	0	0	0	0	0	0	0	0	0	0	0	0
66440	Cdc26	0.35	0.91	1.18	0.66	0.67	0.44	0.58	0.16	0.46	0.18	0.66	0	0.14	0.07	0.12	0.18	0	0.15	0.28	0.41	0	0.09	0.27	0.15	0.16	0.3	0.19	0.44	0	0.19	0	0.2	0.15	0	0.21	0	0	0.12	0.09	0	0	0	0	0	0
217232	Cdc27	0.2	0.04	0.09	0.15	0.06	0.04	0.18	0.04	0.06	0.03	0.05	0.08	0.08	0.12	0.02	0.38	0.01	0.01	0.01	0.03	0.01	0.21	0.03	0.06	0.02	0.02	0.02	0.03	0	0.01	0.23	0.04	0	0.03	0.01	0	0	0.02	0	0	0	0	0	0	0
216150	Cdc34	0.49	0.61	0.45	0.37	0.64	0.75	0.11	0.31	0.25	0.11	0.09	0.42	0.22	0.14	0.19	0.06	0.13	0.36	0.15	0.33	0.24	0	0.08	0.14	0.2	0.21	0.14	0.08	0.36	0.63	0.03	0	0.41	0	0.07	0.45	0.08	0.43	0.37	0	0.14	0	0.23	0.06	0.03
12539	Cdc37	2.96	3.14	6.81	2.47	2.13	3.59	2.11	3.08	3.63	1.91	1.45	1.45	1.91	2.37	1.7	1.54	1.68	1.15	1.92	2.17	1.05	1.63	1.85	1.97	2.11	3.2	1.36	1.26	2.02	2.14	1.43	2.49	2	2.46	1.8	2.64	1.62	2.22	2.05	2.76	2.61	1.34	1.72	1.68	1.18
67072	Cdc37l1	0	0	0	0.05	0.07	0.05	0.03	0.01	0.06	0	0.02	0.01	0.03	0	0	0	0	0.05	0	0	0.02	0	0.07	0	0	0	0	0	0	0.1	0.03	0.05	0	0.06	0.02	0.03	0.04	0	0	0	0	0.02	0.02	0.07	0.03
71713	Cdc40	4.04	0.44	0.36	0.15	12.23	5.28	0.34	0.24	14.63	0.11	10.19	6.28	0.17	0.08	0.07	0.17	0.07	16.14	0.05	1.47	5.69	0.07	0.14	0.07	0.08	0.14	0.15	0.03	0.42	0.05	0	0.05	0.02	0.05	0.01	0.01	0.02	0.07	0.01	0.01	0	0.03	0.06	0	0
12540	Cdc42	5	6.94	10.18	8.13	6.28	6.68	7.24	9.13	8.9	5.72	6.92	6.83	5.55	5.25	12.07	7.6	8.82	13.41	9.36	10.59	8.86	9.58	18.04	13.23	27.14	20.84	18.45	16.76	17.04	25.5	17.54	28.34	26.23	19.85	19.23	19.86	11.9	19.51	17.27	8.91	7.61	11.22	11.99	15.44	10.73
226751	Cdc42bpa	0.01	0.01	0	0	0	0	0.01	0	0	0	0	0	0	0	0.04	0	0	0	0.01	0	0	0	0.01	0.01	0.01	0	0	0	0	0	0	0	0	0.01	0	0.15	0	0	0.01	0	0	0	0	0	0
217866	Cdc42bpb	0.02	0.03	0.03	0.02	0.05	0.04	0.04	0.06	0.06	0.17	0.04	0.17	0.04	0.04	0.13	0.04	0.19	0.1	0.1	0.14	0.06	0.06	0.23	0.38	0.12	0.5	0.35	0.15	0.54	0.59	0.21	0.28	0.34	0.36	0.31	0.49	0.13	0.55	0.18	0.09	0.09	0.7	0.24	0.37	0.34
240505	Cdc42bpg	0	0	0	0	0	0	0	0	0	0	0	0.02	0	0	0	0	0.01	0	0	0.01	0	0	0.02	0	0.02	0.01	0.08	0.02	0	0	0	0.01	0	0	0.01	0.3	0	0	0	0	0	0	0	0	0
104445	Cdc42ep1	0	0.01	0	0.03	0.02	0.01	0.01	0.04	0.03	0	0.01	0.02	0.01	0	0.04	0.01	0	0.04	0	0.09	0.09	0.01	0.03	0.03	0	0.11	0.08	0	0.02	0.05	0.05	0.15	0.07	0	0.08	0.13	0	0.12	0.06	0.03	0	0	0.08	0.1	0.05
260409	Cdc42ep3	0	0	0.01	0	0	0.03	0	0	0	0	0	0.02	0	0	0	0	0	0	0	0	0	0	0	0	0	0	0	0	0	0	0	0	0	0	0	0	0	0	0	0	0	0	0	0	0
56699	Cdc42ep4	0.17	0.04	0.09	0.02	0.04	0.03	0.03	0.02	0.03	0.02	0.09	0.02	0.02	0	0	0.01	0.03	0.04	0.01	0.1	0.01	0	0.08	0.08	0.03	0.14	0.13	0	0.03	0.02	0	0.04	0.16	0.03	0.04	0.03	0.04	0.22	0.01	0.04	0	0.01	0.05	0.06	0
57912	Cdc42se1	0	0.16	0	0.26	0	0.03	0.15	0.11	0.14	0	0.53	0.66	0	0.12	0.38	0.01	0.2	0	0	0	0.06	0	0	0	0	0	1.69	0	0	0	0	0	0	0	0	0	0	0.25	0	0	0	0	0	0	0
72729	Cdc42se2	0	0	0	0.03	0.02	0.04	0.02	0.04	0.04	0	0	0	0	0	0	0	0	0	0.03	0	0	0	0.03	0	0	0	0.02	0	0	0	0	0	0	0	0	0	0	0	0	0	0	0	0.01	0	0
12544	Cdc45	0.03	0.06	0.47	0.31	0.01	0.01	0.2	0.01	0.06	0	0.16	0.1	0.04	0.03	0	0	0.1	0	0	0	0	0	0	0	0	0	0.11	0	0	0	0	0	0	0	0	0	0	0	0	0	0	0	0	0	0
71702	Cdc5l	0.96	0.85	0.95	0.63	0.59	0.48	0.55	0.44	0.6	0.5	0.57	0.51	0.43	0.64	0.31	0.4	0.44	0.43	0.37	0.42	0.19	0.28	0.64	0.36	0.76	1.04	0.53	0.41	0.76	0.45	0.64	1.12	1.12	0.56	0.75	0.48	0.17	0.34	0.16	0.19	0.05	0.08	0.12	0.06	0.1
23834	Cdc6	0	0.24	0	0.25	0	0.2	0.06	0.02	0.02	0	0.01	0.08	0.06	0	0.06	0	0	0	0	0	0.01	0	0	0	0	0	0	0	0	0	0	0	0	0	0	0	0	0	0	0	0	0	0	0	0
12545	Cdc7	0.02	0.01	0	0.02	0	0.01	0	0.01	0.01	0	0.01	0	0.02	0	0	0	0	0	0	0	0	0	0	0	0	0	0	0	0.01	0	0	0	0	0	0	0	0	0	0	0	0	0	0	0	0
214498	Cdc73	0.25	0.38	0.6	0.48	1.13	0.36	0.38	0.32	0.33	0.17	0.31	0.25	0.34	0.27	0.1	0.26	0.56	0.31	0.08	0.21	0.24	0.08	0.18	0.27	0.34	0.8	0.37	0.09	0.16	0.13	0.05	0.21	0.25	0.16	0.25	0.06	0.12	0.23	0.25	0.12	0.04	0.03	0.12	0.04	0.04
108912	Cdca2	0.06	0.17	0.1	0.05	0.04	0.12	0.05	0.07	0.17	0	0.02	0.04	0.01	0	0	0	0	0	0	0	0	0	0	0	0	0	0	0	0	0	0	0	0	0	0	0	0	0	0	0	0	0	0	0	0
14793	Cdca3	0.04	0	0.04	0.02	0.03	0.14	0.02	0.04	0.02	0.01	0.01	0	0.02	0.1	0	0	0	0	0	0	0	0	0	0	0	0	0	0	0	0	0	0	0	0	0	0	0	0	0	0	0	0	0	0	0
67849	Cdca5	0.06	0	0.03	0.04	0.07	0.06	0.06	0.01	0.02	0	0.02	0.02	0	0	0	0.02	0.01	0	0	0	0	0.01	0	0	0	0.01	0	0	0	0	0	0.01	0	0	0	0	0	0	0	0	0	0	0	0	0
66953	Cdca7	0.01	0.01	0.02	0.03	0.03	0.02	0	0.02	0	0	0	0.01	0	0	0	0	0	0	0	0	0	0	0	0	0	0	0	0	0	0	0	0	0	0	0	0	0	0	0	0	0	0	0	0	0
217946	Cdca7l	0.02	0.06	0.02	0.01	0	0	0	0	0	0.03	0	0	0.02	0	0	0	0	0	0	0	0	0.03	0	0	0	0	0	0	0	0	0	0	0	0	0	0	0	0	0	0	0	0	0	0	0
52276	Cdca8	1.02	1.18	1.27	1.24	0.42	0.31	0.41	0.44	0.1	0.11	0.55	0.55	0.51	0.72	0.18	0.07	0.3	0	0.03	0.03	0.03	0.33	0	0	0	0	0	0	0	0	0	0	0	0	0	0	0	0	0	0	0	0	0	0	0
12550	Cdh1	0.04	0	0	0.01	0.02	0.13	0.06	0.13	0.08	0.01	0.08	0.08	0.07	0	0.09	0.08	0.05	0.31	0.12	0.22	0.2	0.1	0.33	0.27	0.35	0.24	0.31	0.01	0.17	0.69	0.28	0.23	0.38	0.77	0.18	1.22	0.1	0.15	0.13	0.15	0	0.01	0.2	0.62	0.09
320873	Cdh10	0	0	0.01	0	0	0	0	0	0	0	0	0	0	0	0	0	0	0	0	0	0	0	0	0	0	0	0	0	0	0	0	0	0	0	0	0	0	0	0	0	0	0	0	0	0
12554	Cdh13	0	0	0	0	0	0	0	0	0	0	0	0	0	0	0	0	0	0	0	0	0	0	0	0	0	0	0	0.02	0	0	0	0	0	0.01	0	0	0	0	0	0.06	0	0	0	0	0
12555	Cdh15	0	0	0	0.01	0	0	0	0	0	0	0.01	0	0	0	0	0	0	0	0	0	0	0	0	0	0	0	0	0	0	0	0	0	0	0	0	0	0	0	0	0	0	0	0	0	0
12557	Cdh17	0	0	0	0	0	0	0	0.01	0	0	0	0.02	0.01	0.02	0	0.01	0.01	0	0	0	0	0	0	0	0	0	0	0	0	0	0.04	0	0	0	0	0	0	0	0	0	0	0.02	0.03	0.04	0.04
12558	Cdh2	0.03	0.01	0.04	0.08	0.02	0.06	0.04	0.04	0.03	0.05	0.02	0.04	0.07	0.01	0.11	0	0.07	0.13	0.06	0.07	0.03	0.08	0.19	0.02	0.21	0.44	0.13	0.13	0.25	0.27	0.36	0.59	0.46	0.7	0.41	0.55	0.73	0.82	0.79	0.34	0.38	0.4	0.46	0.54	0.47
22295	Cdh23	0	0	0	0	0	0	0	0	0	0	0	0	0	0	0	0	0	0	0	0	0	0	0	0	0	0	0	0	0	0.01	0	0	0	0	0	0	0	0	0	0	0	0	0	0	0
239096	Cdh24	0	0	0	0	0	0	0	0	0	0	0	0	0	0	0	0	0	0	0	0	0	0	0	0	0	0	0	0	0	0	0	0	0	0	0	0	0	0	0	0.06	0	0	0	0	0
12560	Cdh3	0	0	0.01	0	0	0.01	0	0	0	0	0	0	0	0	0	0	0	0	0	0	0	0	0	0	0	0	0	0	0	0	0	0	0	0	0	0	0	0	0	0	0	0	0	0	0
12561	Cdh4	0.01	0.01	0.01	0.01	0.01	0.01	0.01	0.01	0.01	0.01	0	0	0	0	0.01	0	0.01	0.03	0.01	0.01	0	0	0.02	0.01	0.03	0.04	0.01	0	0.03	0.04	0.05	0.06	0.03	0.09	0.06	0.06	0.06	0.04	0.05	0.04	0.05	0.04	0	0.03	0.03
12562	Cdh5	0.02	0.02	0.04	0.12	0.04	0.03	0.02	0.05	0.02	0.05	0.03	0.07	0.02	0.02	0.05	0.03	0.1	0.23	0.02	0.07	0.17	0.03	0.25	0.07	0.11	0.04	0.05	0.11	0.09	0.09	0	0.53	0.12	0.04	0.17	0.04	0.02	0.06	0.03	0	0.05	0	0.02	0.07	0.03
12564	Cdh8	0	0	0	0	0	0	0	0	0	0	0	0	0	0	0	0	0	0	0	0	0	0	0	0	0	0	0	0	0	0	0	0	0	0	0	0	0	0	0	0	0	0	0.02	0	0
170677	Cdhr1	0	0	0	0	0	0	0	0	0	0	0	0	0	0	0	0	0	0	0	0	0	0	0	0	0	0	0	0	0	0	0	0	0	0	0	0	0	0	0.02	0	0	0	0	0	0.01
268663	Cdhr2	0	0	0	0	0	0	0.08	0.06	0.04	0	0	0.01	0	0	0	0.01	0.02	0	0	0	0	0	0	0	0	0	0	0	0	0	0	0	0	0	0	0	0	0	0	0	0	0	0	0	0
52858	Cdipt	0.16	0.18	0.12	0.19	0.17	0.33	0.12	0.41	0.31	0.17	0.12	0.22	0.11	0.08	0.38	0.14	0.29	0.12	0.17	0.64	0.2	0.23	0.24	0.72	0.3	0.06	0.96	0.29	0.88	0.24	0.48	0.17	1.04	0.65	1.18	0.66	0.87	0.7	1.78	2.85	0.28	1.81	1.51	1.08	0.4
12534	Cdk1	4.42	5.27	7.76	3.6	4.49	4.93	3.84	3.02	4.42	2.26	2.77	3.03	4.34	2.53	2.21	3.06	1.57	1.07	1.89	0.89	1.4	1.56	0.39	0.89	0.64	1.1	1.35	0.82	1.17	0.78	0.26	0.42	0.47	0.05	0.19	0.04	0.17	0	0.01	0	0	0	0	0	0
12537	Cdk11b	0.4	0.23	0.79	0.24	0.66	0.46	0.19	0.28	0.31	0.16	0.19	0.23	0.18	0.2	0.15	0.14	0.19	0.23	0.08	0.1	0.13	0.11	0.09	0.13	0.14	0.24	0.26	0.3	0.07	0.06	0.13	0.09	0.08	0.03	0.19	0.03	0.07	0.05	0.04	0.05	0	0.36	0.04	0.02	0.03
69131	Cdk12	0.01	0.01	0.01	0.02	0.01	0.01	0.01	0	0.07	0.03	0.01	0.03	0.01	0.02	0	0	0.03	0	0	0.03	0	0	0.06	0.07	0.08	0.71	0.02	0.8	0.05	0	0.01	0	0	0	0.01	0.07	0.02	0	0	0	0	0	0	0.02	0.01
69562	Cdk13	0.01	0.01	0	0.02	0.02	0.03	0.02	0.09	0.04	0.03	0.01	0.02	0.01	0.02	0	0.01	0.03	0.01	0	0	0	0.01	0.06	0.07	0.08	0.07	0.02	0.02	0.05	0	0.01	0	0	0	0.01	0.06	0.02	0	0	0	0	0	0	0.02	0.01
18555	Cdk16	0	0.01	0	0.01	0	0.01	0	0	0	0	0.02	0	0.01	0	0	0	0	0	0	0	0	0	0	0	0	0	0	0	0	0	0	0	0	0	0	0	0	0	0	0	0	0	0	0	0
237459	Cdk17	0	0.02	0	0.02	0.01	0.02	0	0	0	0	0.02	0	0.01	0.01	0	0	0.01	0	0	0	0	0	0	0	0	0	0.04	0	0	0	0.01	0	0.04	0.01	0	0	0.01	0	0	0	0	0	0	0	0
18557	Cdk18	0	0	0	0	0	0.01	0	0	0	0	0	0	0.01	0	0	0	0	0	0	0	0	0	0	0	0	0	0	0	0	0	0	0	0	0.02	0	0	0	0	0	0.01	0	0	0.01	0.01	0
78334	Cdk19	0.01	0.01	0	0.01	0.03	0.01	0.04	0	0.01	0	0	0.02	0.01	0.01	0	0	0	0	0	0	0	0	0	0	0	0	0	0	0	0	0	0	0	0	0	0	0	0	0	0	0	0	0	0	0
12566	Cdk2	0.43	0.38	1.29	0.41	0.41	0.5	0.48	0.35	0.39	0.26	0.21	0.65	0.42	0.39	0.38	0.29	0.4	0.35	0.28	0.24	0.65	0.17	0.13	0.11	0.18	0.31	0.19	0.08	0.32	0.24	0.09	0.11	0.19	0.06	0.17	0.84	0.41	0.05	0.06	0.06	0	0	0.02	0	0
105278	Cdk20	0.07	0.07	0.05	0.08	0.03	0.04	0.06	0.03	0.02	0.07	0.05	0.03	0.11	0.11	0.01	0.04	0.07	0.04	0.02	0.03	0	0	0.04	0	0.02	0	0.04	0.06	0.02	0.01	0	0	0.04	0	0	0.01	0	0.01	0.01	0	0.07	0	0.01	0.12	0
13445	Cdk2ap1	0	0	0	0	1.48	1.91	0	0	1.49	0	0	1.14	0	0	1.03	0	0	0	0	0	0	0	0	0	0	0	0	0	0	0	0	0	0	0	0	0	0	0	0	0	0	0	0	0	0
52004	Cdk2ap2	0	0	0	0	1.48	1.87	0	0	1.49	0	0	1.14	0	0	1	0	0	0	0	0	0	0	0	0	0	0	0	0	0	0	0	0	0	0	0	0	0	0	0	0	0	0	0	0	0
12567	Cdk4	0.47	0.26	1.23	0.24	0.47	0.6	0.22	0.16	0.15	0.1	0.08	0.18	0.07	0.11	0.05	0.12	0.12	0.13	0.06	0.01	0	0.03	0.11	0.06	0.04	0.04	0.04	0.02	0.04	0.04	0	0.04	0.04	0	0	0	0.01	0	0	0	0	0	0	0	0
12568	Cdk5	0.05	0.74	0.01	0.02	0.06	0.07	0.01	0.1	0.05	0.02	0.05	0.18	0.05	0.04	0.82	0.01	0	0.83	0.39	0.01	0.09	0.02	0.05	0.44	0.09	0.29	0.32	0	0.13	0.86	0.1	0.29	0.63	0.09	0.07	0.29	0.24	0.44	0.87	0.36	0.03	0.32	1.03	0.22	0.36
12569	Cdk5r1	0	0	0	0	0	0	0	0	0	0	0	0	0	0	0	0	0	0	0	0	0	0	0	0	0	0	0	0	0.02	0	0	0	0	0	0	0	0	0	0	0	0	0	0	0	0
66971	Cdk5rap1	0.02	0	0	0	0.01	0.01	0	0	0.01	0	0.08	0.01	0.01	0	0.01	0	0	0	0	0	0	0	0	0	0	0	0	0	0	0	0.01	0	0.01	0	0	0	0	0	0.04	0	0	0.03	0	0.01	0
214444	Cdk5rap2	0.03	0	0.03	0	0.01	0.02	0.02	0	0	0	0.01	0	0	0	0	0	0	0	0	0	0	0	0	0	0	0	0	0	0	0	0	0	0	0	0	0	0	0	0	0	0	0	0	0	0
80280	Cdk5rap3	0.02	0.08	0.11	0.12	0.15	0.13	0.08	0.18	0.12	0.18	0.16	0.12	0.18	0.13	0.2	0.22	0.11	0.36	0.43	0.47	0.32	0.4	0.58	0.16	1.1	0.93	0.6	0.53	0.35	0.51	0.93	0.8	0.61	0.74	0.32	0.55	0.55	0.37	0.48	0.56	0.2	0.37	0.43	0.63	0.43
12571	Cdk6	0.26	0.32	0.41	0.28	0.3	0.33	0.22	0.17	0.29	0.27	0.15	0.21	0.22	0.27	0.14	0.05	0.11	0.45	0.36	0.06	0.48	0.06	0.14	0.17	0.41	0.28	0.42	0.64	0.46	0.12	0.4	0.55	0.47	0.77	0.74	0.34	0.12	0.28	0.13	0.16	0.12	0.29	0.22	0.18	0.09
12572	Cdk7	0.08	0.14	0.35	0.07	0.13	0.04	0.24	0.07	0.04	0.02	0	0.08	0.02	0.23	0.01	0.03	0	0.02	0	0.02	0.01	0	0.03	0.11	0.04	0.1	0.2	0.07	0.14	0	0.09	0.22	0.01	0.01	0	0.01	0.01	0.25	0	0.01	0	0.02	0	0.04	0
264064	Cdk8	0.01	0.01	0.01	0.03	0.03	0.01	0.04	0	0.01	0	0	0.02	0.01	0.01	0	0	0	0	0	0	0	0	0	0	0	0	0	0	0	0	0	0	0	0	0	0.01	0	0	0	0	0	0	0	0	0
107951	Cdk9	0.11	0.13	0.32	0.22	0.3	0.26	0.26	0.1	0.26	0.08	0.15	0.11	0.08	0.17	0.13	0.19	0.08	0.21	0.07	0.08	0	0.05	0.14	0.05	0.44	0.09	0.06	0.03	0.12	0.15	0.1	0.09	0.2	0.05	0.13	0.12	0.11	0.06	0.12	0.05	0.05	0.05	0.08	0.06	0.03
68916	Cdkal1	0	0.03	0.01	0.01	0.01	0.05	0.01	0	0.04	0.01	0	0	0	0.01	0.01	0	0	0	0.01	0.01	0.01	0	0.02	0	0.01	0.02	0.02	0	0.01	0.01	0	0.02	0.03	0.01	0	0.03	0.01	0.01	0.02	0	0	0	0.02	0.02	0.02
213084	Cdkl3	0	0	0	0	0	0	0	0	0	0	0	0	0	0	0	0	0	0	0	0	0	0	0	0.01	0.01	0	0	0	0	0.01	0	0	0	0	0	0.02	0.01	0	0	0	0	0	0	0	0
381113	Cdkl4	0	0	0	0.03	0.01	0	0	0	0	0	0	0	0	0	0	0	0	0	0	0	0	0	0	0	0	0	0	0	0	0	0	0	0	0	0	0	0	0	0	0	0	0	0	0	0
382253	Cdkl5	0	0	0	0	0	0	0	0	0	0	0	0	0	0	0	0	0	0	0	0	0	0	0	0	0	0	0	0	0	0	0	0	0	0.01	0	0.01	0	0	0	0	0.01	0	0	0	0
12576	Cdkn1b	0.06	0.01	0.03	0.02	0.01	0	0.02	0.07	0.02	0.02	0.03	0.04	0.07	0	0.03	0.03	0.03	0.03	0	0	0.07	0	0.06	0.06	0.05	0.16	0	0	0	0.07	0.05	0.05	0.14	0	0	0.12	0.36	0.05	0.05	0.05	0.02	0	0.03	0.05	0.06
12577	Cdkn1c	1.46	0.89	1.5	0.61	0.66	0.78	0.71	0.82	0.49	0.84	0.58	0.67	0.55	0.34	0.92	0.96	1.14	3.55	0.46	0.53	0.99	0.23	0.09	0.03	0.49	0.21	0.24	0.17	0.36	0.41	0.3	0.51	0.4	0.98	0.17	0.28	0	0	0	0	0	0	0	0	0
70925	Cdkn2aip	0.06	0.01	0.24	0.04	0.11	0.5	0.05	0.06	0.21	0.04	0.03	0.34	0.29	0.19	0.16	0.07	0.2	0.49	0.81	0.09	0.13	0.01	0.35	0.1	0.94	0.26	0.2	0.57	0.34	0.41	0.54	0.86	0.59	0.4	1.07	0.91	0.12	0.73	0.45	0.28	0.05	0.04	0.95	0.27	0.35
52626	Cdkn2aipnl	1.19	0	0.07	0.03	0.04	0.18	0.06	0.4	0.34	0.06	0.02	0.08	0.02	0.14	2.02	0	0.02	0.12	0	0	0	0	0	0.11	0	0	0.19	0.16	0.87	0	0.07	0	0.16	0	0.8	0.11	0	0.03	0.01	0	0	0	0	0	0.03
12579	Cdkn2b	0	0	0	0	0	0	0	0	0	0	0	0	0	0	0	0	0	0	0	0	0	0	0	0	0	0	0	0	0	0	0	0	0	0	0	0	0	0	0.15	0	0	0	0	0	0
12580	Cdkn2c	0	0	0	0	0	0	0.02	0	0	0	0	0.08	0	0	0.03	0	0	0	0	0	0	0	0.07	0	0	0	0	0	0	0	0	0	0	0	0	0	0.06	0.21	0.11	0.08	0	1.65	0.1	0.34	0.02
12581	Cdkn2d	0.06	0	0.16	0.24	0.11	0.13	0.14	8.93	0.08	0.05	0.08	11.28	0.03	0.02	0	0.05	0.07	8.72	0.05	0	0	0	0.09	0	0	0	10.77	0	0	0	0	0.38	0	0	0	0	0	0	0	0	0.35	0	0	0	0
72391	Cdkn3	0.01	0	0.04	0	0.03	0.04	0	0	0	0	0.01	0.01	0.03	1.66	0	0	0.79	0	0	0	0	0	0	0	0	0	0	0	0	0	0	0	0	0	0	0	0	0	0	0	0	0	0	0	0
227526	Cdnf	0	0	0.8	0.31	0	0.34	0	0	0.24	0	0.23	0	0	0	0	0	0.26	0	0	0	0	0	0.55	0	0.63	0.78	0.47	0	0.61	1.69	0	0	0.79	0.78	0.99	0.81	0	0.89	1.01	0	0.68	1.04	0.78	0.74	1.43
12583	Cdo1	0	0	0	0	0	0	0	0	0	0	0	0	0	0	0	0	0	0.06	0	0.03	0	0	0.04	0	0.07	0	0.02	0.06	0.01	0.25	0.25	0	0.13	0.44	0	0.01	1.79	2.3	1.2	0.06	0.82	0.86	0.34	1.11	0.59
12585	Cdr2	0.01	0.01	0	0	0	0.01	0.01	0	0	0	0.01	0.01	0.01	0.12	0	0.02	0	0	0.01	0	0	0	0	0	0	0	0	0	0	0	0	0	0	0	0	0	0	0	0	0	0	0	0	0	0
237988	Cdr2l	0	0	0	0	0	0	0	0	0	0	0	0	0	0	0	0	0	0	0	0	0	0	0	0	0	0	0	0	0	0	0	0	0.01	0	0	0	0	0	0	0	0	0	0	0	0
110911	Cds2	0	0	0.01	0	0	0.01	0	0.03	0	0	0.01	0.01	0	0.01	0.02	0	0	0.02	0.02	0.02	0	0.02	0.04	0.02	0.03	0.09	0.14	0.02	0.05	0.05	0.06	0.11	0.23	0.5	0.14	0.23	0.08	0.1	0.18	0.06	0.14	0.06	0.16	0.11	0.13
386463	Cdsn	0	0	0	0	0	0	0	0	0	0	0	0	0	0	0	0	0	0	0.06	0	0	0	0	0	0	0	0	0	0	0	0	0	0	0	0	0	0	0	0	0	0.61	0	0	0.02	0
321022	Cdv3	1.78	1.18	1.99	0.95	1.07	0.48	1.26	0.73	0.94	0.68	0.42	0.96	0.95	0.06	1.21	0.58	0.31	1.49	2.01	2.72	0.91	0.36	0.1	3.35	2.98	0.96	3.71	4.27	0.69	4.8	0.13	0.08	3.74	0.94	0	4.34	0.35	0.48	0.16	1.7	0.15	0.04	4.69	4.56	3.79
12593	Cdyl	0.08	0.13	0.13	0.07	0.1	0.03	0.07	0.08	0.06	0.05	0	0.01	0.04	0.05	0.01	0	0	0	0	0.02	0	0	0.03	0	0	0	0	0	0	0	0	0	0	0	0	0	0.1	0	0	0.07	0	0.01	0	0	0
26365	Ceacam1	0	0	0	0.01	0.04	0	0	0.1	0.02	0.01	0.01	0.02	0.01	0.01	0.06	0.01	0.03	0.11	0.17	0.05	0.12	0.11	0.12	0.21	0.16	0.2	0.17	0.22	0.05	0.25	0.33	0.39	0.24	0.32	0.28	0.57	0.58	0.58	0.86	0.24	0.63	0.34	0.49	0.89	0.63
26367	Ceacam2	0	0	0	0	0	0	0	0.01	0	0	0	0	0	0	0	0	0	0	0.01	0	0.01	0.01	0	0.03	0.01	0.02	0.03	0	0	0.03	0.03	0.03	0.06	0.02	0.04	0.06	0.03	0.07	0.11	0.01	0	0.02	0.02	0.08	0.11
12606	Cebpa	0	0.03	0	0	0	0.01	0.05	0	0	0	0.15	0.05	0	0	0.05	0	0	0.24	0.12	0	0.17	0.01	0.02	0	0.04	0	0.16	0.12	0	0.04	0	0	0.01	0	0.61	0.03	0.36	0	0.6	1.14	0	0.02	0	0.02	0.02
12608	Cebpb	0	0	0	0	0	0.01	0.01	0.01	0.02	0	0	0.02	0.02	0	0	0	0	0	0	0	0.01	0.03	0.11	0	0	0	0	0.01	0	0	0.04	0	0.01	0	0	0	0	0	0	0	0	0	0.01	0	0
110794	Cebpe	0	0	0	0	0	0	0	0.01	0.08	0.1	0	0	0	0	0.16	0.01	0.14	0.14	0.02	0.08	0.05	0	0	0	0	0	0.01	0.07	0	0.06	0	0	0	0	0	0	0.14	0	0	0	0	0	0	0	0
12607	Cebpz	0.15	0.13	0.1	0.19	0.18	0.17	0.21	0.04	0.06	0.05	0.08	0.09	0.07	0.07	0.03	0.06	0.02	0.01	0.02	0.04	0.03	0.02	0.06	0.02	0.06	0.11	0.04	0.02	0.02	0	0.01	0	0	0.01	0	0	0	0.01	0	0	0	0	0	0.01	0
68554	Cebpzos	0.05	0	0	0.08	0	0	0	1.02	0	0.08	0	0	0.04	1.16	0.51	0.08	0.82	0	0.13	0.06	0	0.01	0	1.09	0.34	0.31	0	0.22	0.24	0.42	0	0	0	0	0.15	0.57	0	0.64	0	0	0	0	0.26	0.12	0.12
330409	Cecr2	0	0.01	0	0.02	0.03	0.01	0.01	0.01	0	0	0	0	0	0	0	0	0	0	0	0	0	0	0	0	0	0	0	0	0	0	0	0	0	0	0	0	0	0	0	0	0	0	0	0	0
12613	Cel	0	0	0	0	0	0	0	0	0	0	0	0	0	0	0	0.6	0.23	0.93	0	0	0	0	0	0	0	0	0.08	0	0.02	0.02	0	0	1.05	0	0	0	0	0	0	0	0	0	0	0	0
109901	Cela1	0	0	0	0	0	0	0	0	0	0	0	0	0	0	0	0	0.15	0.92	0	0	0	0	0	0	0	0	0.14	0	0	0	0	0	0.09	0	0	0	0	0	0	0	0	0	0	0.08	0
13706	Cela2a	0	0	0	0	0	0	0	0	0	0	0	0	0	0	0	0.31	1.27	2.44	0	0	0	0	0	0	0	0	0.57	0	0.06	0.06	0	0	0.82	0.01	0	0.03	0	0	0	0	0	0	0.01	0.03	0
242711	Cela3a	0	0	0	0	0	0	0	0	0	0	0	0	0	0	0	0	0.07	0.11	0	0	0	0	0	0	0	0	0.06	0	0	0.02	0	0	0.02	0	0	0	0	0	0	0	0	0	0	0	0
67868	Cela3b	0	0	0	0	0	0	0	0	0	0	0	0	0	0	0	0.03	0.35	0.14	0	0	0	0	0	0	0	0	0.08	0	0	0.02	0	0	0.74	0	0	0	0	0	0	0	0	0	0	0	0
13046	Celf1	1.16	1.24	1.85	1.08	1.13	0.78	0.82	1.16	0.53	1.07	0.71	0.77	0.92	0.77	0.66	0.9	0.71	0.7	0.7	0.63	0.6	0.26	0.76	0.66	0.96	1.1	0.81	0.91	0.83	0.64	1	0.7	0.94	0.68	0.76	1.14	0.44	1.37	1.29	0.41	0.18	0.44	1.23	0.51	0.4
14007	Celf2	0	0.01	0.21	0.12	0.11	0.18	0.16	0.17	0.19	0.09	0.08	0.12	0.04	0.08	0.14	0.12	0.26	0.26	0.61	0.1	0.37	0.03	0.92	0.35	1.37	1.72	0.82	2.04	1.23	0.54	3.36	2.73	1.74	0.02	0	0	3.09	1.94	1.7	0	0	0	0.01	1	0.02
319586	Celf5	0	0	0	0	0	0	0	0	0	0	0	0	0	0.01	0	0	0	0	0	0	0	0	0	0	0	0	0	0	0	0	0	0	0	0	0	0	0	0	0	0	0	0	0	0	0
76183	Celf6	0	0	0	0	0	0	0	0	0	0	0	0	0	0	0	0	0	0	0	0	0	0	0	0	0	0	0	0	0	0	0	0	0	0	0	0	0	0.3	0	0	0	0	0	0	0
12614	Celsr1	0	0	0	0	0	0	0	0	0	0	0	0	0	0	0	0	0	0	0	0	0	0	0	0	0	0	0	0	0	0	0	0	0	0	0	0	0.01	0	0	0	0	0	0	0	0
107934	Celsr3	0	0	0	0	0	0	0	0	0	0	0	0	0	0	0	0	0	0	0	0	0	0	0	0	0	0	0	0	0	0	0	0	0	0	0.01	0	0	0	0	0	0	0	0	0	0
83921	Cemip2	0.02	0.03	0.02	0.01	0.02	0.02	0.07	0.01	0.02	0.02	0.02	0	0.01	0	0.06	0.02	0.02	0.14	0.02	0.02	0.02	0.01	0.03	0.02	0.12	0.03	0.02	0.01	0.01	0.01	0	0.05	0.02	0.01	0	0.03	0.04	0.01	0.01	0.01	0	0	0	0.02	0
57754	Cend1	0	0	0	0	0	0	0	0	0	0	0	0	0.11	0	0	0	0.13	0	0	0	0	0	0	0	0	0	0	0	0	0	0	0	0	0	0	0	0	0	0	0	0	0	0	0	0
12617	Cenpc1	0.01	0.03	0	0	0.01	0.04	0.01	0.05	0	0	0	0	0	0.02	0	0.01	0	0	0	0.13	0	0	0	0	0	0	0	0	0.02	0	0	0	0.02	0	0	0	0	0	0	0	0	0	0	0	0
229841	Cenpe	0.17	0.02	0.02	0.07	0.03	0.04	0.04	0.01	0.02	0.01	0	0	0.01	0.03	0.01	0	0.02	0.02	0	0	0.03	0	0.04	0.03	0	0	0.03	0	0.02	0	0.04	0	0	0	0.03	0	0.02	0.03	0.03	0	0	0	0	0	0.02
108000	Cenpf	0.02	0.01	0.04	0.01	0.02	0.04	0.03	0	0.02	0	0	0	0	0	0	0	0	0	0	0	0	0	0	0	0	0	0	0	0	0	0	0	0	0	0	0	0	0	0	0	0	0	0	0	0
26886	Cenph	0.09	0.09	0.69	0.25	0.26	0.4	0.13	0.16	0.21	0.04	0.02	0.08	0.05	0.08	0.02	0.02	0.03	0.1	0	0	0	0.01	0	0	0	0	0	0	0	0	0	0	0.1	0	0	0	0	0	0	0	0	0	0	0	0
102920	Cenpi	0	0	0	0	0	0.01	0	0	0	0	0	0	0	0	0	0	0	0	0	0	0	0	0	0.07	0	0	0	0	0	0	0	0	0	0	0	0	0	0	0	0	0	0	0	0	0
219103	Cenpj	0	0	0.1	0.01	0.22	0	0	0	0.04	0	0	0.04	0	0.05	0	0	0	0.03	0	0	0.03	0	0	0.02	0	0	0	0	0.02	0.02	0	0	0.02	0	0.02	0	0.04	0.01	0.01	0.04	0	0	0	0.01	0
60411	Cenpk	0.04	0.12	5.68	0.15	4.51	0.14	0.11	0.02	1.93	0.16	0.11	0.04	0.19	0.05	0.03	0.14	0.06	0	0	0	0	0.05	0	0	0	0	0	0	0	0	0	0	0	0	0	0	0	0	0	0	0	0	0	0	0
66570	Cenpm	0	0	0	0	0	0	0.01	0	0	0	0	0	0.01	0	0	0	0	0	0	0	0	0	0	0	0	0	0	0	0	0	0	0	0	0	0	0	0	0	0	0	0	0	0	0	0
72155	Cenpn	0	0	0	0	0	0	0.01	0	0	0	0	0	0	0	0	0	0	0	0	0	0	0	0	0	0	0	0	0	0	0	0	0	0	0	0	0	0	0	0	0	0	0	0	0	0
52504	Cenpo	0.01	0.01	0	0	0.02	0.02	0.02	0	0	0.01	0.01	0	0.03	0	0	0.02	0.03	0	0.02	0	0	0.05	0	0	0	0	0	0.14	0	0	0	0	0	0	0	0	0	0	0	0	0	0	0	0	0
66336	Cenpp	0.01	0	0	0.02	0.05	0.02	0	0.05	0.08	0	0.01	0.01	0	0	0	0	0	0	0	0	0	0	0	0	0	0	0	0	0	0	0	0	0	0	0	0	0	0	0	0	0	0	0	0	0
83815	Cenpq	0	0.01	0.02	0	0	0	0	0	0	0	0	0	0.01	0.01	0	0	0	0	0.01	0	0	0	0.33	0	0	0	0	0	0	0	0.45	0	0	0	0	0	0	0	0	0	0	0	0	0	0
69928	Cenps	0	0	0	0	1.06	0.17	0.08	0	0	0	0	0	0	0	0	0	0	0	0	0	0	0	0	0	0	0	0	0	0	0	0	0	0	0	0	0	0	0	0	0	0	0	0	0	0
320394	Cenpt	0.01	0	1.98	0	0	0	0	0	0.01	0	0	0	0	0	0	0	0	0	0	0	0	0	0	0	0	0	0	0	0	0	0	0	0	0	0	0	0	0	0	0	0	0	0	0	0
71876	Cenpu	0	0	0	0.01	0	0	0.01	0	0	0	0	0	0	0.01	0	0	0	0	0	0	0	0	0	0	0	0	0	0	0	0	0	0	0	0	0	0	0	0	0	0	0	0	0	0	0
73139	Cenpv	1.31	0.09	0.32	1.76	0.79	1.44	1.37	0.1	0.12	0.08	0	0.01	0.08	0.01	0.14	0.02	1.47	0.3	0.08	0.29	0.08	0.12	3.46	0.08	0.06	0.19	0.7	0.96	1.43	0.13	3.68	0.7	0.65	0.46	2.86	0.62	0.17	2.88	2.03	0.87	0.72	2.21	1.38	2.02	1.67
20892	Cenpx	0.01	0.01	0.03	0	0.01	0	0.79	0	0	0.02	0	0	0.02	0	0.02	0.02	0	0	0.03	0	0	0	0	0	0	0	0	0	0	0	0	0	0	0.24	0	0	0	0	0	0	0	0	0	0	0
230967	Cep104	0.02	0.02	0	0.02	0.01	0	0.02	0	0.01	0	0.01	0.03	0.02	0.02	0	0	0.01	0	0	0	0	0.01	0	0	0.02	0	0	0	0	0	0.01	0	0.02	0	0	0	0	0	0	0	0	0	0	0	0
225523	Cep120	0.01	0.02	0	0	0.29	0.04	0	0	0.39	0	0	0.01	0	0	0	0	0	0	0	0	0	0	0	0	0	0	0.39	0	0	0	0	0	0	0	0	0	0	0	0	0	0	0	0	0	0
12009	Cep131	0.02	0.01	0.04	0	0.01	0.01	0	0	0.01	0	0.4	0.01	0.01	0	0	0	0	0	0	0	0	0	0	0	0.01	0	0	0	0	0	0	0	0	0	0	0	0	0	0	0	0	0	0	0	0
381644	Cep135	0	0.01	0.02	0.02	0.01	0	0.02	0	0	0	0	0.02	0.05	0	0	0.04	0	0	0	0	0	0	0	0	0	0	0	0	0	0	0	0	0.03	0	0	0	0	0	0	0	0	0	0	0	0
99100	Cep152	0	0	0	0	0.01	0	0	0.31	0	0	0	0	0.02	0	0	0	0	0	0	0	0	0	0	0	0	0.01	0	0	0	0	0	0	0	0	0	0	0	0	0	0	0	0	0	0	0
214552	Cep164	0	0	0	0	0	0	0	0	0	0	0	0	0	0	0	0	0	0	0	0	0	0	0	0	0.01	0	0	0	0	0	0	0	0	0	0	0	0	0	0	0	0	0	0	0	0
545389	Cep170	0.02	0	0.03	0.01	0	0.08	0.01	0.02	0	0	0.01	0	0	0.03	0	0	0	0.1	0.02	0	0	0	0	0.01	0	0	0.02	0.01	0	0.01	0	0	0.01	0.01	0	0	0	0	0	0	0	0	0	0	0
217882	Cep170b	0	0	0	0	0	0	0	0	0	0	0	0	0	0	0	0	0	0	0	0	0	0	0	0	0.01	0	0	0	0	0	0	0	0	0	0	0	0	0	0	0	0	0	0	0	0
70799	Cep192	0	0	0.03	0	0	0	0.02	0	0	0	0	0	0	0	0	0	0	0	0	0	0	0	0	0	0	0	0	0	0	0	0	0.03	0	0	0	0	0	0	0	0	0	0	0	0	0
16328	Cep250	0.09	0.14	0.18	0.02	0.07	0.07	0.05	0.04	0.02	0.02	0.03	0.07	0.04	0.02	0.01	0	0	0	0	0	0.01	0	0	0.01	0	0	0.01	0	0	0	0	0	0	0	0.05	0	0	0	0	0	0	0.16	0	0	0
216274	Cep290	0	0	0	0	0	0	0	0	0	0	0	0	0	0	0	0	0	0	0	0	0	0	0	0	0	0	0	0	0.01	0	0	0	0	0	0	0	0	0	0	0.02	0	0	0	0	0
319675	Cep295	0.11	0.1	0.05	0.01	0	0	0	0	0	0.17	0.06	0	0	0.07	0	0.08	0	0	0.07	0	0	0.04	0.08	0	0.15	0	0	0	0	0	0	0	0	0	0	0	0	0	0	0	0	0	0	0	0
74081	Cep350	0.01	0	0	0	0	0	0	0	0	0	0	0.19	0	0	0	0	0	0	0	0	0	0	0.01	0.01	0	0	0	0	0.01	0.01	0	0	0.02	0	0	0	0	0.02	0	0	0	0	0	0.01	0
83922	Cep41	0.2	0.01	0.2	0.04	0.03	0.09	0.07	0.05	0.08	0.03	0.06	0.02	0.01	0.01	0.01	0.01	0.03	0.13	0	0	0	0.01	0.11	0.02	0	0	0.01	0.01	0	0	0	0	0.07	0	0	0	0	0.05	0	0	0	0	0.08	0.01	0.04
382010	Cep44	0	0	0	0	0	0	0	0	0	0	0	0	0	0	0.01	0	0	0	0	0	0	0	0	0	0	0	0	0	0	0	0	0	0	0	0	0	0	0	0	0	0	0	0	0	0
74107	Cep55	0.02	0	0	0	0.03	0	0.04	0	0	0	0	0	0	0	0	0	0	0	0	0	0	0	0	0	0	0	0	0	0	0	0	0	0	0.01	0	0	0	0	0	0	0	0	0	0	0
74360	Cep57	0.01	0.07	0	0.02	0	0	0	0	0.01	0	0	0	0	0	0	0	0	0	0	0	0	0	0	0	0	0	0	0	0	0	0	0	0	0	0	0	0	0	0	0	0	0	0	0	0
28135	Cep63	0	0.01	0	0	0.02	0.01	0	0	0.01	0.03	0	0	0	0	0	0	0	0	0	0	0	0	0	0	0	0	0	0	0	0	0	0	0	0	0	0	0.03	0	0	0	0	0	0	0	0
216543	Cep68	0.05	0	0.01	0.04	0.01	0.02	0.02	0	0	0.02	0.01	0	0.03	0.01	0	0	0	0.01	0	0	0	0	0.05	0	0	0	0	0	0	0	0	0	0	0	0.06	0	0	0	0	0	0	0	0	0.02	0
68121	Cep70	0	0	0	0	0.02	0	0.08	0	0	0	0	0	0	0	0.34	0	0	0.26	0	0	0	0	0	0	0.53	0	0	0	0	0	0.25	0.2	0	0	0	0	0.22	0	0	0	0	0.17	0	0	0
225659	Cep76	0.12	0.11	0.12	0.13	0.16	0.14	0.15	0.14	0.08	0.13	0.1	0.1	0.2	0.13	0.09	0.21	0.03	0.1	0.86	0.03	0.04	0.04	0.01	0.05	0	0.14	0.08	0	0	0.16	0	0.26	0	0	0.35	0.69	0	0.16	0.13	0	0	0	0	0.07	0.06
77048	Cep83	0	0	0	0	0	0	0	0	0	0	0	0	0	0	0	0	0	0.06	0	0	0	0	0	0	0	0	0	0	0	0	0	0	0	0	0	0	0	0	0	0	0	0.29	0	0	0
70012	Cep85	0.09	0	0.02	0	0	0.01	0.01	0	0.01	0	0	0.01	0	0	0	0	0	0	4.48	0	0	0	0	0	1.71	0	0	0.34	0	0	0	0	0.04	3.33	0	0	0	0	0.01	0	0	0	0	0	0
320162	Cep95	0.02	0	0	0	0	0	0	0	0	0	0	0	0	0	0	0	0	0	0	0	0	0	0	0	0	0	0	0	0	0	0	0	0	0	0	0	0	0	0	0	0	0	0	0	0
74201	Cep97	0	0	0.01	0	0	0	0	0	0	0	0	0	0	0	0	0	0	0	0	0	0	0	0	0	0	0	0	0	0	0	0	0	0	0	0	0	0	0	0	0	0	0	0	0	0
99712	Cept1	0	0.02	0	0.07	0.04	0.02	0	0.1	0.07	0	0.09	0.04	0	0	0.4	0	0	0.06	0.61	0	0	0.17	0.55	0.21	1.93	0.45	0.48	1.34	2.69	1.39	1.61	0.95	1.74	0.7	1.46	2.29	0.73	0.59	1.96	0.74	0.85	1.17	0.38	0.38	2.4
12622	Cer1	0	0	0	0	0	0	0	0	0	0	0	0	0	0	0	0	0	0	0	0	0	0	0	0	0	0	0	0	0	0	0	0	0	0	0	0	0	0	0	0	0	0	0	0.05	0
99151	Cercam	0.45	0	0.25	0.01	0.01	0.14	0	0	0	0.02	0.01	0	0.04	0	0	0.01	0	0	0	0	0	0	0	0	0	0	0	0	0	0	0	0	0	0	0	0	0	0	0	0	0	0	0	0	0
76893	Cers2	0.34	0.28	0.28	0.47	0.08	0.23	0.38	0.68	0.39	0.31	0.35	0.39	0.35	0.37	0.42	0.41	0.31	1.15	0.08	0.46	0.26	0.05	0.62	0.69	1.08	0.84	1.01	1.15	1.22	1.23	1.24	2.05	1.63	1.2	1.19	2.99	3.13	3.26	5.39	2.27	4.08	2.18	3.64	3.62	2.74
71949	Cers5	0	0	0	0.01	0	0	0	0	0	0	0	0	0	0	0	0	0	0	0	0	0	0	0	0	0	0	0	0	0	0	0	0	0	0	0	0	0	0	0	0	0	0	0	0	0
241447	Cers6	0	0	0.01	0	0	0	0.02	0	0	0	0.02	0	0	0	0	0	0.03	0	0	0	0	0	0	0	0	0	0.02	0	0	0	0	0.07	0.04	0	0.02	0	0	0	0	0	0	0	0.01	0	0
244595	Ces1a	0	0	0	0	0	0	0.02	0.02	0	0.04	0.05	0	0.02	0	0.04	0.06	0.11	0.31	0.4	0.2	0.67	0.2	0.15	0.87	0.42	1.65	1.59	0.65	2.66	6.09	3.01	5.07	7.27	6.96	3.38	11	5.28	10.83	10.8	4.68	17.83	5.82	7.73	8.1	8.75
382044	Ces1b	0	0	0	0	0	0	0.02	0.02	0.02	0.05	0.07	0.01	0.02	0.01	0.14	0.1	0.14	0.39	0.5	0.32	0.76	0.31	0.25	0.9	0.91	2.15	1.98	1.33	3.2	7.02	4.95	6.22	8.1	9.52	5.41	14.84	8.58	16.53	16.85	8.77	22.73	9.21	10.6	11.46	12.1
13884	Ces1c	0	0	0	0	0	0	0.02	0.08	0.02	0.09	0.06	0.28	0.02	0	0.2	0.28	0.21	0.98	0.78	1.26	1.39	0.63	0.43	1.45	1.7	4.42	3.12	3.39	5.98	12.29	9.53	10.23	11.62	15.21	9.98	22.08	14.58	23.49	20.58	17.17	27.16	13.05	15.56	19.53	15.36
104158	Ces1d	0	0	0	0.03	0.08	0	0.33	0.54	0.19	0.71	0.6	0.69	0.48	0.4	1.5	1.47	0.92	3.85	4.79	7.68	3.13	4.64	3.91	5.76	14.9	18.47	13.04	15.56	26.31	47.39	36.41	41.2	40.95	56.27	52.3	85.52	63.02	99.39	94.31	89.19	79.53	39.4	65.92	74.74	74.3
13897	Ces1e	0	0	0	0	0	0	0.01	0	0	0.04	0.03	0	0.01	0	0.01	0.05	0.05	0.05	0.17	0.22	0.05	0.14	0.04	0.1	0.39	0.42	0.53	0.39	0.34	0.4	0.37	0.69	0.48	1.52	1.36	1.51	1.66	4.06	2.62	9.43	4.05	6.52	3.36	6.31	5.86
234564	Ces1f	0	0	0	0	0	0	0	0.01	0	0.01	0.01	0	0	0	0.01	0.02	0.02	0	0.04	0.07	0.01	0.05	0.07	0.02	0.11	0.17	0.08	0.18	0.29	0.26	0.26	0.33	0.23	0.44	0.51	1.63	3.15	3.25	2.86	31.71	21.32	14.47	36.65	32.23	28.66
12623	Ces1g	0	0	0	0	0	0	0.02	0.03	0.03	0.07	0.13	0.04	0.03	0.01	0.27	0.34	0.18	0.44	0.65	0.34	0.76	0.37	0.27	0.93	1.34	2.61	1.96	0.99	3.64	7.45	5.31	7.28	8.1	11.82	7.61	22.06	25.21	36.93	34.51	22.15	39.84	20.27	23.56	18.59	23.2
75704	Ces1h	0	0	0	0	0	0	0	0	0	0.01	0.01	0	0	0	0.01	0.02	0.01	0	0.04	0.05	0.01	0.04	0.03	0.02	0.11	0.04	0.06	0.15	0.1	0.11	0.05	0.11	0.11	0.11	0.17	0.29	0.32	0.33	0.51	0.65	0.23	0.1	0.35	0.57	0.54
102022	Ces2a	0	0	0	0.02	0.03	0.02	0.28	0.7	0.56	0.96	0.31	0.61	0.4	0.24	1.07	0.72	0.95	4.28	5.67	5.96	4.75	2.77	4.17	4.32	16.64	11.96	7.07	21.93	14.29	17.66	22.3	28.02	15.41	23.96	19.28	14.92	28.32	35.51	34.87	37.06	12	7.56	28.2	24.29	31.88
234669	Ces2b	0	0	0.01	0.01	0.01	0.04	0.02	0.02	0	0	0.01	0.15	0.04	0.03	0.08	0.13	0.02	0.24	0.24	0.22	0.12	0.06	0.12	0.1	0.41	0.72	0.17	1.31	0.94	1.02	1.29	1.4	2.39	3.08	2.36	4.8	2.59	3.31	3.07	2.32	1.32	1.08	5.39	3.09	3.33
234671	Ces2c	0	0	0.01	0	0	0.05	0	0	0	0	0	0.12	0.02	0	0.07	0.12	0	0.33	0.31	0.21	0.13	0.04	0.11	0.09	0.53	0.82	0.25	1.72	1.62	1.23	3.51	1.83	2.78	3.24	2.34	4.81	2.5	3.22	2.97	3.47	2.4	2.69	17.55	11.66	8.82
234673	Ces2e	0	0	0.01	0	0.01	0.04	0	0.03	0.05	0.03	0.03	0.15	0.02	0.03	0.1	0.16	0.08	0.69	0.55	0.85	0.54	0.37	0.51	0.28	1.2	2.05	0.97	9.69	12.27	12.74	13.33	15.45	17.84	17.55	28.12	25.55	10.22	15.74	17.57	9.87	6.29	5.59	16.33	11.06	12.94
71903	Ces2f	0	0	0.01	0	0	0.04	0	0	0	0	0	0.1	0	0	0.04	0.11	0	0.2	0.17	0.19	0.01	0.01	0.13	0.05	0.18	0.43	0.12	1.92	1.36	1.48	2.3	1.88	2.87	4.05	3.31	5.32	2.5	3.49	3.1	1.88	1.07	1.13	3.04	2.3	3.13
72361	Ces2g	0.01	0.01	0.01	0.02	0.02	0.04	0.12	0.04	0.01	0.06	0.03	0.24	0.15	0.06	0.1	0.18	0.06	0.27	0.19	0.23	0.06	0.06	0.15	0.05	0.36	0.66	0.08	1.07	0.8	1.22	1.21	1.17	2.26	3.73	2.9	6.81	3.59	4.57	4.27	2.69	2.12	2.24	6.26	3.69	3.84
436059	Ces2h	0	0	0	0	0.01	0	0	0	0.03	0.02	0.03	0.04	0.02	0.02	0.01	0.04	0.06	0.36	0.17	0.43	0.34	0.2	0.18	0.14	0.46	0.39	0.36	1.54	0.8	1.41	1.53	1.31	0.76	1.5	1.39	2.45	1.63	3.53	1.65	2.89	1.34	0.52	4.55	1.91	1.26
382053	Ces3a	0	0	0	0	0	0	0	0	0	0.01	0	0	0	0	0	0	0	0.23	1.03	0.83	0.11	0.94	1.73	1.19	2.27	3.4	1.13	6.67	8.96	9.82	3.28	5.22	4.17	8.1	9.99	6.85	21.45	31.5	30.28	205.08	66.81	47.14	146.62	198	166.05
13909	Ces3b	0	0	0	0	0	0	0	0	0	0.01	0	0	0	0	0	0	0	0.1	0.3	0.1	0.04	0.19	0.43	0.44	1.14	0.62	0.24	3.32	3.83	5.27	1.37	1.94	1.72	3.96	4.43	3.65	12.97	16.56	14.93	143.26	41.79	26.9	93.66	103.44	110.68
67935	Ces5a	0	0	0	0	0	0	0	0	0	0	0	0	0	0	0	0	0	0.02	0	0	0	0	0	0.01	0.06	0	0.05	0.15	0.17	0.13	0	0	0.12	0.14	0.29	0.01	0.2	0.24	0.31	0.32	0	0.09	0.58	0.15	0.27
26369	Cetn1	0.06	0.06	0.12	0.11	0	0.15	0.04	0.01	0	0	0.03	0	0.04	0	0	0	0.03	0	0	0	0	0	0	0	0	0.11	0	0	0	0	0	0	0	0.05	0	0	0	0	0	0	0	0	0	0	0
26370	Cetn2	0.18	0.2	0.44	0.22	0.14	0.36	0.24	0.16	0.26	0.1	0.11	0.15	0.12	0.08	0.05	0.02	0.13	0.12	0.08	0.11	0.09	0.07	0.08	0.15	0.1	0.19	0.08	0.06	0.09	0.23	0.09	0.32	0.05	0.18	0.1	0.05	0.11	0.26	0.19	0.07	0.06	0.07	0.06	0.07	0.06
12626	Cetn3	0.04	0.21	0.12	0.43	0.04	0.35	0.12	0.18	0.13	0.05	0.07	0.21	0.01	0.22	0	0	0	0.11	0.01	0.09	0.3	0	0	0	0	0	0	0.01	0	0	0	0	0	0	0	0	0	0	0	0	0	0	0	0	0
227736	Cfap157	0	0	0	0	0	0.01	0	0	0	0	0	0	0	0	0	0	0	0	0	0	0	0	0	0	0	0	0	0	0	0	0	0	0	0	0	0	0	0	0	0	0	0	0	0	0
14894	Cfap20	0.12	0.19	0.14	0.35	0.03	0.09	0.03	0.03	0	0	0.09	0	0.02	0.16	0	0.03	0	0	0.02	0.05	0	0.03	0.03	0.04	0.06	0	0	0	0.13	0	0	0.05	0.16	0	0.03	0.04	0	0	0.19	0	0	0	0.57	0	0
75784	Cfap299	0	0	0	0	0	0	0	0	0	0	0	0	0	0	0	0	0	0	0	0	0	0	0	0	0	0	0	0	0	0	0	2.74	0	0	0	0	0	0	0	0	0	0	0	0	0
216618	Cfap36	0.01	0	0	0.36	0.02	0.02	0	1.26	0.01	0.89	0.01	0.86	0.01	0.68	0	0	0	0.02	0	0	0	0.01	0.11	0	0	0	0	0	0	0.01	0	1.33	0	0.02	0	0	0	0	0	0	0.83	0	0	1.39	0
67884	Cfap410	0	0	0	0	0	0	0	0	0	0	0	0	0	0	0	0	0	0	0	0	0	0	0	0	0	0	0	0	0	0	0	0	0	0	0.04	0	0	0	0	0	0	0.06	0	0	0
100048534	Cfap43	0	0	0	0	0	0	0	0	0	0	0	0	0	0	0	0	0	0	0	0	0	0	0	0	0.02	0	0	0	0	0	0	0	0	0	0	0	0	0	0	0	0	0	0	0	0
212517	Cfap44	0	0.02	0.04	0	0.02	0.03	0	0	0	0	0	0	0	0	0	0.04	0	0.02	0	0	0	0	0	0	0	0.03	0.05	0	0	0	0	0.02	0	0	0	0	0	0	0	0.01	0.07	0.03	0.01	0	0
74453	Cfap53	0	0	0	0	0	0	0	0	0	0	0	0	0	0	0	0	0	0	0	0	0	0	0	0	0	0	0	0	0	0	0	0	0	0	0	0	0	0	0.17	0	0	0	0	0	0
68625	Cfap57	0	0	0	0	0	0	0	0	0	0	0	0	0	0	0	0	0	0	0	0	0	0	0	0	0	0	0	0	0	0	0	0	0	0	0	0.02	0.09	0	0	0	0	0	0	0	0
381229	Cfap58	0	0	0	0	0	0	0	0	0	0	0	0	0	0	0	0	0	0	0.01	0	0	0	0	0	0	0	0	0	0	0	0	0	0	0	0	0	0	0	0	0	0	0	0	0	0
241116	Cfap65	0	0	0	0	0	0	0	0	0	0	0	0	0	0	0	0	0	0	0	0	0	0	0	0	0	0	0	0	0	0	0	0	0	0	0	0	0	0	0	0	0	0.01	0	0	0
14962	Cfb	0.02	0.05	0.01	0.01	0.05	0.05	0.01	0.24	0.12	0.07	0.05	0.11	0.03	0.02	0.18	0.12	0.17	0.55	0.48	0.51	0.53	0.27	0.24	0.16	0.47	0.2	0.29	1.42	0.91	1.06	0.61	2.35	1.25	1.42	1.88	4.37	0.38	5.13	4.79	0.2	0.76	12.32	1.33	5.97	5.14
11537	Cfd	0	0	0	0	0	0	0	0	0	0	0	0	0	0	0.02	0	0	0.06	0.09	0.05	0	0	0	0	0	0	0	0.07	0.03	0.09	0.04	0.03	0.09	0.17	0.14	0	0.08	0.03	0.04	0.11	0.05	1.31	0.05	0.16	0.02
23837	Cfdp1	0.88	0.83	1.46	0.56	0.78	1.01	0.62	0.45	0.63	0.3	0.63	0.51	0.51	0.23	0.19	0.36	0.29	0.4	0.31	0.26	0.12	0.03	0.26	0.16	0.16	0.32	0.15	0.3	0.28	0.46	0.03	0.59	0.59	0.1	0.17	0.33	0.04	0.6	0.3	0.04	0.24	0.16	0.21	0.35	0.29
12628	Cfh	0	0	0	0	0	0	0	0	0	0	0	0.01	0	0	0.02	0	0	0.27	0.22	0.29	0.25	0.1	0.22	0.26	0.12	0.11	0.14	0.5	0.46	0.91	0.24	0.89	0.54	0.93	0.54	0.75	0.56	0.76	0.69	0.28	0.27	0.46	0.58	0.76	0.76
50702	Cfhr1	0	0	0	0	0	0	0	0	0	0	0	0	0	0	0	0	0	0	0	0	0	0	0	0	0	0	0	0	0	0	0	0	0	0	0	0	0	0	0	0	8.05	0	0	0	0
545366	Cfhr2	0	0	0	0	0	0	0	0	0	0	0	0	0	0	0.03	0.02	0.01	0.24	0.14	0.14	0.08	0.12	0.14	0.11	0.26	0.3	0.07	0.28	0.23	0.83	0.22	0.63	0.38	0.67	0.41	0.32	0.62	0.38	0.36	0.46	0.27	0.33	0.53	0.39	0.33
12630	Cfi	0	0	0.01	0.01	0	0.01	0.01	0.19	0.21	0.01	0.16	0.17	0.18	0.02	0.24	0.01	0.18	0.31	0.19	0.09	0.16	0.01	0.07	0.08	0.01	0.1	0.17	0.09	0.28	0.27	0.44	0.14	0.2	0.38	0.17	0.08	0.11	0.12	0.26	0.12	0.2	0.04	0.03	0.13	0.05
12631	Cfl1	89.72	66.92	204.99	52.13	143.5	122.69	51.84	121.66	91.01	83.63	58.92	171.29	67.38	45.62	119.41	55.17	68.96	153.15	56.14	71.59	125.15	72.38	95.72	183.16	216.13	154.98	199.55	71.02	115.23	252.88	88.67	240.7	149.35	101.6	93.35	135.24	43.16	90.16	89.3	47.52	47.46	26.32	24.39	86.69	74.75
12632	Cfl2	10.89	5.4	14.88	9.03	7.17	4.3	3.74	8.71	10.94	3.98	4.2	8.62	3.68	3.95	4.19	7.99	4.09	11.42	12.34	10.89	5.76	8.65	8.28	11.94	17.81	10.8	11.92	11.01	7.9	13.85	19.53	13.13	13.81	16.55	20.19	21.07	11.5	14.47	19.44	12.05	9.31	8.64	6.27	10.66	8.54
18636	Cfp	0	0	0	0	0	0	0.01	0.02	0.01	0	0	0.02	0.01	0	0	0.02	0.02	0.04	0.01	0.02	0.01	0.03	0.12	0.02	0.02	0.02	0.07	0.23	0.01	0.07	0	0.12	0.2	0	0	0	0	0.05	0	0.02	0	0.52	0	0.03	0.01
12638	Cftr	0	0	0	0	0	0	0	0	0	0	0	0	0	0	0.01	0	0	0	0	0	0	0	0	0	0	0	0	0	0	0	0	0	0	0	0	0	0	0	0	0	0	0	0	0	0
106143	Cggbp1	0.9	0.3	0.42	0.3	0.39	0.42	0.12	0.17	0.18	0.32	0.18	0.31	0.26	1.14	0.4	0.23	0.2	0.36	0.01	0.19	0.14	0.02	0.09	0.04	0.22	0.06	0.34	0.06	0.13	0.21	0.04	0.02	0.04	0	0	0.19	0.17	0.1	0	0	0.02	0.07	0.04	0	0.03
70737	Cgn	0.31	0	0.12	0.06	0.03	0.37	0.29	0.34	0.15	0.4	0.55	0.4	0.38	0.08	0.73	0.35	0.46	0.44	0.48	0.53	0.92	0.21	0.65	1.29	0.62	1.3	0.72	0.43	1.34	0.82	1.54	1.65	1.18	1.78	0.83	1.16	0.55	0.96	0.69	0.18	1.53	0.84	1.11	0.93	0.65
68178	Cgnl1	0.04	0	0	0	0	0	0	0	0.01	0.01	0	0	0.01	0	0	0	0	0.02	0	0	0	0	0	0	0	0	0	0	0	0.04	0.03	0.06	0.03	0.13	0.05	0.12	0.17	0.07	0.1	0.03	0.04	0.04	0.07	0.08	0.12
68567	Cgref1	0.03	0.01	0.02	0	0	0	0	0	0	0.03	0	0	0.01	0	0	0	0.01	0	0.01	0	0	0.04	0.01	0.04	0.37	0.1	0.05	0.18	0	0.02	0	0	0.04	0	0	0	0	0	0	0	0	0	0	0	0
68755	Cgrrf1	0	0	0	0	0	0	0	0	0	0	0	0	0	0	0	0	0	0	0	0	0	0	0	0	0	0	0	0	0	0	0	0.02	0	0	0	0	0	0.04	0.04	0	0.03	0.01	0.01	0.06	0.1
68044	Chac2	0.06	0.01	0.06	0.02	0.05	0.14	0.15	0.12	0.07	0.04	0.09	0.13	0.09	0.14	0.15	0.09	0.08	0.14	0.24	0.08	0.06	0.13	0.08	0.12	0.57	0.16	0.12	0.06	0.14	0.11	0.01	0.21	0.25	0.45	0.15	0.2	0.09	0.3	0.33	0.12	0.12	0	0.11	0.29	0.13
27221	Chaf1a	0.17	0.18	0.5	0.16	0.25	0.21	0.07	0.09	0.11	0.1	0.06	0.24	0.13	0.11	0.06	0.04	0.04	0.04	0.03	0.03	0.02	0.01	0	0.01	0.01	0.01	0	0.01	0	0.01	0	0	0	0	0	0	0	0	0	0	0	0	0	0	0
110749	Chaf1b	0.36	0.22	0.71	0.27	0.31	0.36	0.18	0.27	0.21	0.16	0.12	0.29	0.25	0.14	0.07	0.06	0.11	0.09	0.03	0.01	0.02	0.06	0.07	0.01	0.01	0.03	0.02	0.03	0.01	0.03	0.01	0.01	0.02	0	0	0	0	0	0	0	0	0	0	0	0
101994	Champ1	0.07	0.08	0.37	0.11	0.06	0.43	0.08	0.04	0.04	0.02	0.04	0.04	0.06	0.03	0.03	0.02	0.02	0.04	0.04	0.03	0.02	0.03	0.04	0.02	0.02	0.02	0.01	0.05	0	0.01	0	0.03	0.05	0	0.02	0.01	0.01	0.01	0.01	0	0	0.01	0	0	0
12647	Chat	0	0	0	0	0	0	0	0	0	0	0	0	0	0	0	0	0	0	0	0	0	0	0	0	0.04	0	0	0	0	0	0	0	0	0	0	0	0	0	0	0	0	0	0	0	0
66121	Chchd1	0.25	0	0.39	0.11	0.03	0.13	0.1	0.03	0.07	0	0.09	0.06	0.05	0.13	0.04	0	0.07	0	0.02	0.04	0.14	0	0.22	0.04	0.69	0.19	0.15	0.23	0.39	0.08	0.9	0.15	0.26	0.39	0.41	0.48	0.7	0.03	0.02	0.39	0.44	0.38	0.16	0.62	0.24
103172	Chchd10	0	0	0	0	0	0	0	0	0	0	0	0	0	0	0	0	0	0	0	0	0.39	0	0	0	0.06	0	0	0	0	0.8	0	0	0	0	0.03	1.18	0	0	2.02	0	0.03	0	0.22	3.1	1.67
14004	Chchd2	0.48	0.51	1.22	0.62	0.42	0.59	0.62	0.61	0.77	0.81	0.57	0.5	0.43	0.69	0.86	0.24	0.31	1.05	0.77	0.75	0.79	0.61	1.99	0.53	1.99	0.86	0.3	0.88	0.64	1.3	0.79	0.93	1.11	0.91	1.31	1.32	2.47	2.04	1.81	2.93	1.32	1.28	0.72	0.74	1.28
66075	Chchd3	1.38	1.49	2.92	1.54	1.59	2.06	1.75	0.97	1.05	2.37	1.46	1.08	2.07	1.14	3.51	2	2.95	4.46	2.97	6.11	4.21	2.73	6.04	3.2	4.41	5.38	4.48	4.21	7.09	3.65	8.14	13.29	3.5	8.01	11.24	6.26	5.36	10.95	9.83	9.2	19.06	18.86	9.79	3.34	4.08
72170	Chchd4	0.27	0.3	0.6	0.47	0.7	0.45	0.39	0.97	0.92	0.24	0.25	0.31	0.34	0.19	0	0.3	0.35	0.48	0.05	0.4	0.37	0.29	0.79	1.23	0.92	0.67	0.5	0.51	0.34	0.51	1.02	0.6	0.64	1.09	0.65	2.54	1.07	0.58	0.66	0.95	1.59	0.75	0.77	0.68	0.85
66170	Chchd5	0.12	0.13	0.43	0.28	0.07	0.28	0.02	0.11	0.05	0.05	0.18	0.5	0.13	0.06	0.1	0	0.05	0.4	0.18	0.16	0.34	0.09	0.78	0.23	0.24	0.04	0.84	0.16	0.27	0.54	0.28	0.43	0.26	0.48	0.61	0.2	0.25	0.57	0.54	0.39	0.14	0.42	0.13	0.32	0
66098	Chchd6	0.04	0.18	0.51	0.09	0.19	0.18	0.08	0.05	0.02	0.05	0.16	0.08	0.07	0.01	0.26	0.02	0.04	0.51	0.52	0.05	0.25	0.06	0.05	0.11	0.07	0.08	0.08	0.17	0.19	0.04	0.07	0.15	0.22	0.06	0.35	0.04	0.05	0.1	0.34	0.02	0	0.22	0.06	0.02	0.03
66433	Chchd7	0.01	0	0.12	0	0.11	2.47	0	0.06	0	0	0	0	0.01	0	0	0	0	0.03	0.02	0	0.04	0	0.07	0.26	0.02	0.87	0.21	0.09	0.17	0.04	0.12	0.22	0.06	0.07	0	0.08	0.19	0.23	0.11	0.14	0.13	0	0.04	0.08	0.04
12648	Chd1	0.01	0.06	0.05	0.06	0.07	0.08	0.02	0.01	0.01	0	0.01	0.1	0.01	0.01	0	0	0.01	0.01	0	0.05	0	0	0.01	0	0	0.01	0.01	0	0.01	0	0	0.01	0	0	0	0.04	0	0	0	0	0	0	0	0	0
68058	Chd1l	0.07	0.02	0.03	0.05	0.02	0.03	0.05	0.01	0.01	0.1	0.03	0.01	0	0.01	0	0.01	0	0.01	0	0	0	0	0.05	0.01	0	0.02	0	0	0	0	0.01	0	0	0	0	0	0	0	0	0	0	0	0	0	0
244059	Chd2	0.02	0	0.01	0	0.01	0.01	0.02	0	0	0.01	0.01	0.05	0.01	0.01	0	0.01	0.01	0.01	0.03	0.01	0.01	0	0.03	0.03	0.01	0	0.01	0	0	0.03	0	0.01	0.02	0	0.03	0.04	0	0	0	0	0	0	0	0	0
216848	Chd3	0.07	0.08	0.1	0.07	0.31	0.06	0.05	0.05	0.05	0.03	0.05	0.05	0.05	0.05	0.04	0.03	0.02	0.06	0.02	0.03	0.03	0.02	0.02	0.02	0	0.06	0.02	0.01	0.04	0.02	0.03	0.04	0.03	0.02	0.03	0.01	0.01	0.01	0.01	0	0	0.01	0.01	0.01	0
107932	Chd4	0.62	0.59	1.22	0.49	0.55	0.57	0.47	0.37	0.5	0.27	0.34	0.43	0.36	0.37	0.37	0.22	0.25	0.3	0.18	0.21	0.3	0.22	0.27	0.19	0.48	0.29	0.24	0.22	0.25	0.4	0.14	0.32	0.28	0.14	0.17	0.29	0.09	0.2	0.13	0.04	0.06	0.03	0.11	0.09	0.05
269610	Chd5	0.09	0.08	0.12	0.1	0.08	0.07	0.09	0.08	0.07	0.04	0.07	0.07	0.07	0.08	0.04	0.04	0.05	0.08	0.05	0.04	0.04	0.05	0.02	0.04	0.04	0.09	0.04	0.05	0.07	0.06	0.02	0.07	0.03	0.03	0.03	0.06	0.03	0.05	0.01	0.01	0	0.01	0.01	0.01	0.01
71389	Chd6	0	0	0	0.01	0	0	0.01	0	0	0	0	0	0	0	0	0	0	0	0	0	0	0	0	0	0	0	0	0	0	0	0	0	0	0	0	0	0	0	0	0	0	0	0	0	0
320790	Chd7	0.02	0.01	0.28	0.02	0.01	0.04	0.17	0	0.01	0.13	0.01	0	0.01	0	0	0	0	0	0.01	0	0	0	0	0	0	0	0	0	0	0	0	0	0	0	0	0	0	0	0	0	0	0	0	0	0
67772	Chd8	0.01	0.01	0.04	0.03	0.02	0.01	0.02	0.01	0.01	0.01	0.02	0	0.01	0.01	0	0	0.01	0	0	0	0	0	0	0.01	0	0	0	0	0.01	0	0	0	0	0	0	0	0	0	0	0	0	0	0	0	0
109151	Chd9	0	0	0.01	0	0	0.01	0	0	0	0	0	0	0	0	0	0	0	0	0	0	0	0	0	0	0	0	0	0	0	0	0	0	0	0	0	0	0	0	0	0	0	0	0	0	0
218865	Chdh	0	0	0	0	0.01	0	0.01	0.32	0.25	0.23	0.14	0.73	0.15	0.09	1.57	0.71	0.65	3.67	3.52	3.26	4.22	4.2	2.62	2.89	8.55	5.15	4.78	12.35	10.29	13.38	8.55	12.56	14.2	18.82	20.1	18.35	11.7	10.26	8.13	11.09	11.75	8.74	6.46	7.71	7.39
12649	Chek1	0.29	0.42	0.31	0.18	0.26	0.51	0.1	0.12	0.17	0.08	0.1	0.36	0.19	0.12	0	0.03	0.02	0.06	0.03	0	0.01	0	0.02	0	0.01	0	0	0	0.04	0	0	0	0	0	0	0	0	0	0	0	0	0	0	0	0
50883	Chek2	0.04	0.03	0.08	0.01	0.05	0.03	0.09	0.08	0.1	0.01	0.03	0.02	0.01	0.04	0	0.01	0.04	0	0	0	0	0	0	0	0	0	0.12	0	0	0	0	0	0	0	0	0	0	0	0	0	0	0	0	0	0
27967	Cherp	0.59	0.78	0.87	0.31	0.6	0.53	0.41	0.42	0.41	0.46	0.65	0.39	0.35	0.44	0.32	0.59	0.19	0.19	0.77	0.82	0.19	0.47	0.2	0.56	0.41	0.45	0.17	0.4	0.22	0.57	0.43	0.06	0.49	0.03	0.3	0.26	0.15	0.44	0.35	0.13	0.04	0.09	0.32	0.08	0.11
231600	Chfr	0	0	0	0	0	0	0	0	0	0	0	0.03	0	0	0	0	0	0	0	0	0	0	0	0	0	0	0	0	0	0	0	0	0	0	0	0	0	0	0	0	0	0	0	0	0
12652	Chga	0	0	0	0	0	0	0	0	0	0	0	0	0	0	0	0	0	0	0	0	0	0	0	3.93	0	0	0	0	0	13.42	0	0	0	0	0	0	0	0	0	0	0	0	0	0	0
81600	Chia1	0	0	0	0	0	0	0	0	0	0	0	0	0	0	0	0	0	0	0	0	0	0.03	0	0	0	0	0	0	0	0	0	0	0	0	0	0	0	0	0	0	0	0	0	0	0
68038	Chid1	0	0.03	0.09	0.08	0.07	0.07	0.12	0.08	0.04	0.11	0.06	0.13	0.07	0.06	0.04	0.03	0.09	0.13	0.02	0.13	0.04	0.16	0	0.16	0.07	0.01	0.07	0.62	0.15	0.28	0	0.59	0.27	0.11	0.16	0.41	0.3	0.17	0.66	0.09	0.26	0.07	0.88	0.61	0.22
12654	Chil1	0	0	0	0	0	0	0	0.02	0.01	0.01	0	0.1	0	0	0.05	0	0.07	0.15	0.06	0.12	0.09	0	0	0	0	0.02	0.01	0	0.02	0.01	0	0	0.01	0	0	0	0	0	0	0	0	0	0	0	0
12655	Chil3	0.08	0	0	0	0	0	0	0.24	0.07	0.04	0.18	0.25	0	0	1.6	0.51	0.56	3.16	7.58	10.08	2.41	1.67	1.77	5.83	2.53	2.19	2.91	18.87	1.63	2.99	4.88	0.96	1.15	0.06	0.1	0.1	0.12	0.1	0.06	0.08	0.03	0	0.08	0.12	0.1
104183	Chil4	0	0	0	0	0	0	0	0.03	0.01	0	0	0	0	0	0.11	0.04	0.06	0.2	0.29	0.46	0.11	0.22	0.21	0.24	0.41	0.16	0.51	0.16	0.01	0.25	0.42	0.08	0.11	0	0.22	0.02	0.04	0	0.02	0.01	0	0	0.01	0	0
12660	Chka	0	0	0	0	0.02	0.01	0	0	0	0	0.07	0.04	0	0	0	0	0	0.01	0	0	0	0	0.01	0.06	0.04	0	0.07	0	0.01	0.13	2.46	4.58	0.01	0.02	0	1.18	0	0.06	0.09	0.01	0	0	0.01	0	1.22
12651	Chkb	0	0	0.01	0.02	0.01	0.02	0	0.02	0	0	0.03	0.01	0	0.06	0	0	0.07	0	0	0.02	0.01	0.04	0.09	0.1	0.26	0.44	0.14	0.16	0.22	0.1	0.23	0.18	0.27	0.23	0.55	0.16	0.5	0.33	0.13	0.15	0.19	0.3	0.15	0.22	0.17
12662	Chm	0.09	0.13	0.09	0.1	0.04	0.08	0.14	0.04	0.1	0.03	0.07	0.05	0.08	0.02	0.01	0.04	0.02	0.05	0.19	0.03	0.04	0.03	0.03	0	0.4	0.01	0.12	0	0.08	0.02	0.12	0.5	0.32	0.06	0.03	0.11	0.26	0	0	0.29	0.02	0	0.12	0.03	0
12663	Chml	0	0	0	0	0	0	0.08	0	0	0	0	0	0	0	0	0	0	0	0	0	0	0	0	0	0	0	0	0	0	0	0	0	0	0	0	0	0	0	0	0	0	0	0	0	0
234852	Chmp1a	0.29	0.47	0.67	0.2	0.21	0.34	0.32	0.3	0.27	0.23	0.19	0.4	0.24	0.09	0.57	0.27	0.15	0.32	0.49	0.16	0.43	0.07	0.12	0.35	0.6	0.62	0.46	0.36	0.2	0.91	0.18	0.11	0.82	0.51	0	0.15	0.57	0.62	0.24	0.1	0.53	0.15	0.07	0.12	0.53
67064	Chmp1b	0	0	0.04	0.18	0	1.75	0.07	0.05	0.03	0	0.76	0.18	0	0.19	0.46	0	0	0.19	0	0.27	0.16	0	0	0	0	0	0	0	0.72	0.28	0	0	1.59	0.56	1.85	1.23	0	0.34	0.29	0	0.06	0	0.28	0.13	0.11
68953	Chmp2a	1.32	0.75	0.83	1.05	0.77	1.03	0.41	0.52	1	1.22	0.84	1.09	0.98	0.57	0.61	1	0.7	0.88	1.22	0.91	0.83	0.94	0.67	1.54	1.46	1.63	1.6	1.33	0.25	0.82	0.71	0.77	2.33	2.44	0.5	0.81	1.47	1.58	2.32	0.89	1.05	0.29	1.06	1.02	1.73
68942	Chmp2b	0.25	0.03	0.34	0	0.28	0.3	0.05	0	0.17	0	0.03	0	0.29	0.16	0.12	0.04	0.23	0.35	0.05	0	0.3	0	0.46	0.01	0.09	0.04	0	0	0	0.59	0.77	0	0.05	0	0	0	0	0.08	0.03	0.06	0	0	0	0.16	0.05
66700	Chmp3	0.47	0.9	1.2	0.66	0.44	0.52	0.49	0.54	1.02	0.67	0.58	0.64	0.3	0.25	0.44	0.3	0.33	0.6	0.3	0.16	0.26	0.22	0.65	0.74	0.59	1.09	0.5	0	0.69	0.87	0.22	1.2	1.32	0.24	0.82	1.69	0.31	0.9	1.27	0.51	0.82	0.39	0.54	0.64	0.35
75608	Chmp4b	2.35	1.25	2.42	0.77	1.47	2.29	1.12	2.05	1.58	1.71	0.5	1.77	0.78	1.09	1.67	1.73	1.03	1.96	1.49	2.61	1.34	1.89	1.17	0.87	1.9	1.72	1	0.99	0.64	1.7	0.96	1.12	0.94	0.96	1.63	0.65	0.43	0.55	0.98	0.4	0.07	0.76	0	0.2	0.22
66371	Chmp4c	0	0	0	0	0	0	0	0	0	0	0	0.05	0	0	0.04	0	0	0	0	0	0	0	0	0	0	0	0	0	0	0	0	0	0	0	0	0	0	0	0	0	0	0	0	0	0
76959	Chmp5	0.32	0.09	0.67	0.22	0.67	0.26	0.07	0.69	0.93	0.28	0.18	0.64	0	0.34	0.4	0.13	0.25	1.4	0.48	0.39	0.2	0.3	0.96	0.81	0.4	0.66	1.15	0.2	0	0.13	0.48	0.38	1.24	0.23	0.51	0	0.26	0.86	0.13	0.44	0.22	0.15	0.31	0.42	0.21
208092	Chmp6	0.16	0.15	0.35	0.2	0.03	0.54	0.23	0.12	0.15	0.14	0.14	0.13	0	0.14	0	0.15	0.12	0.14	0.02	0.12	0.08	0.1	0	0.07	0.05	0.24	0.2	0.2	0.26	0.15	0.14	0.29	0.42	0.22	0.19	0.06	0.02	0.15	0.06	0	0	0.11	0	0.15	0
105513	Chmp7	0.06	0.01	0.03	0.05	0.06	0.03	0.03	0.06	0.06	0.01	0.02	0.07	0.02	0.03	0.05	0.05	0	0.16	0.01	0.04	0.03	0.01	0.04	0	0.02	0	0.03	0.16	0.01	0.1	0.03	0.08	0.07	0	0.03	0.08	0.01	0.04	0.05	0	0	0.02	0.05	0.03	0.01
69993	Chn2	0	0	0	0	0	0	0	0	0	0	0	0	0	0	0	0	0	0	0	0	0	0	0	0	0	0.05	0.01	0.02	0.02	0.02	0.01	0.01	0.03	0.04	0.03	0.11	0.47	0.15	0.15	0	0	0.03	0.04	0.02	0.01
66917	Chordc1	1.24	1.35	3.03	1.54	2.18	1.63	0.67	1.07	1.67	0.58	0.71	1.24	0.69	0.66	1.65	0.53	0.38	1.65	0.56	0.72	0.93	0.3	0.29	0.58	0.39	0.28	0.49	0.24	1.15	0.47	1.2	0.29	0.76	0.42	0.42	0.87	0.53	1.7	1.53	0.72	0.87	1.23	1.79	1.09	1.44
56398	Chp1	0.04	0.05	0.08	0.05	0.19	0.15	0.17	0.05	0.03	0.03	0.14	0.13	0.17	0.06	0.13	0.04	0.05	0.18	0.14	0.18	0.15	0.11	0.24	0.45	0.36	0.76	0.84	0.66	0.55	0.78	0.5	0.79	0.59	0.5	0.61	2.35	0.14	0.48	0.43	0.18	0.23	0.13	0.21	0.34	0.3
74241	Chpf	0	0	0	0	0	0	0	0	0	0	0	0.05	0	0	0	0	0	0	0	0	0	0	0	0	0	0	0	0	0	0	0	0	0	0	0	0.17	0	0	0	0	0	0	0	0	0
100910	Chpf2	0	0	0	0.09	0	0	0.04	0	0	0	0	0	0	0.03	0	0	0.03	0	0	0	0	0	0	0	0.01	0	0.02	0.17	0	0.01	0.42	0.02	0	0.01	0	0	0	0	0	0	0	0	0	0	0
212862	Chpt1	0	0	0	0	0	0	0	0	0	0	0	0	0	0	0	0	0	0	0	0	0	0	0	0	0	0	0	0	0	0	0	0	0	0	0.08	0	0	0	0	0	1.21	0.11	0.11	0.39	0.74
93696	Chrac1	0.4	0.28	0.33	0.27	0.54	0.56	0.21	0.41	0.63	0.03	0.58	0.26	0.27	0.5	0.06	0.44	0.17	0.1	0.11	0.12	0.14	0	0	0.06	0.43	0.06	0.16	0.22	0	0.09	0	0.07	0.08	0.04	0	0	0	0	0	0	0	0	0.03	0	0
504186	Chrna10	0	0	0	0	0	2.26	0	0	0.35	0	0	0.43	0.04	0	0.68	0	0	1.03	0	0	0	0	0	0	0	0	0	0	0.01	0.62	0	0	0	0	0	2.92	0	0	0	0	0	0	0	0	0
110835	Chrna5	0	0	0	0	0	0	0	0	0	0	0	0	0	0	0	0	0	0	0.06	0	0	0	0	0	0	0	0	0	0	0	0	0	0	0	0	0	0	0	0	0	0	0	0	0	0
11447	Chrnd	0	0	0	0	0	0	0	0	0	0	0	0	0	0	0	0	0	0	0	0	0	0	0	0	0	0	0	0	0	0	0	0	0.07	0	0	0	0	0	0	0	0	0	0	0	0
11448	Chrne	0.07	0.07	0.13	0.06	0.06	0.09	0	0.05	0.05	0.08	0.06	0.06	0.08	0.04	0.04	0.08	0.07	0	0.11	0.29	0.07	0.09	0.22	0.1	0.17	0.2	0.08	0.2	0.14	0.17	0.28	0.25	0.17	0.22	0.16	0.27	0.16	0.08	0.12	0.1	0.11	0	0.06	0.06	0.06
11449	Chrng	0	0	0.01	0	0	0	0	0	0	0	0	0	0	0	0	0	0	0	0	0	0	0	0	0	0	0	0	0	0	0	0	0	0	0	0	0	0	0	0	0	0	0	0	0	0
59031	Chst12	0	0.01	0	0	0	0	0	0	0	0	0	0	0	0	0	0	0	0	0	0	0.01	0	0	0	0	0	0	0	0	0	0	0	0	0	0	0	0	0	0	0	0	0	0	0	0
71797	Chst13	0	0	0	0	0.01	0	0	0.01	0.01	0	0	0.07	0	0	0	0	0	0.03	0.01	0	0	0	0	0	0	0	0	0	0.02	0	0	0	0.01	0.02	0.01	0	0	0	0	0	0	0	0	0	0
72136	Chst14	0.02	0	0	0	0	0	0	0	0	0	0	0	0	0.02	0	0	0	0	0	0	0	0.01	0	0	0	0	0	0	0	0	0	0	0.06	0	0	0	0	0	0	0	0	0	0	0.17	0
77590	Chst15	0	0	0	0	0	0	0	0	0	0	0	0	0	0	0	0	0	0	0	0	0	0	0	0	0	0.01	0	0	0	0	0	0	0	0	0	0	0	0	0	0	0	0	0	0	0
53374	Chst3	0	0	0	0	0	0	0	0	0	0	0	0	0	0	0	0	0	0	0	0	0	0	0	0	0	0	0	0	0	0.52	0	0	0	0	0	0	0	0	0	0	0	0	0	0	0
26887	Chst4	0	0	0	0	0	0	0	0	0	0	0	0	0	0	0	0.04	0	0	0	0	0	0	0	0	0	0	0	0	0	0	0.34	0	0	0	0	0	0.28	0	0	0	0	0	0	0	0
269941	Chsy1	0	0	0.03	0	0	0	0	0	0	0	0	0	0	0	0	0	0	0	0	0	0	0	0	0	0	0	0	0	0	0	0	0	0	0	0	0	0	0	0	0	0	0	0	0	0
214901	Chtf18	0.06	0.02	0.08	0.2	0.1	0.05	0.07	0.03	0.02	0.02	0.13	0.04	0.11	0.02	0.01	0	0.01	0	0.01	0.01	0	0	0	0.01	0	0	0	0	0	0	0	0	0	0	0	0	0	0	0	0	0	0	0	0	0
214987	Chtf8	0	0	0	0.05	0	0.05	0	0	0	0	0	0	0	0	0	0	0	0	0	0	0	0	0	0	0	0	0	0	0	0	0	0	0	0	0	0	0	0	0	0	0	0	0	0	0
66511	Chtop	0.59	0.77	0.53	0.17	0.18	0.26	0.22	0.11	0.1	0.07	0.17	0.15	0.03	0.18	0.05	0	0.02	0	0.21	0.11	0.13	0.23	0.52	0.08	0.14	0.04	0.25	0.12	0.16	0.09	0.1	0.05	0.03	0.01	0.25	0	0.09	0.05	0.26	0.2	0	0.25	0.2	0.21	0.06
12675	Chuk	0	0.01	0.01	0.01	0.01	0.01	0.01	0.01	0.01	0	0.01	0.01	0	0	0	0	0.01	0.01	0	0	0.01	0	0.03	0.01	0.01	0.01	0.03	0	0.03	0	0	0.01	0.01	0.02	0.05	0.03	0.01	0.17	0.06	0	0.01	0.03	0.01	0.16	0.09
211151	Churc1	0.02	0.06	1.95	0	0	0.08	0	0.06	0.07	0	0	0.04	0	0	0	0	0	0	0	0	0	0.03	0.08	0.04	0	0.08	0	0.11	0	0.07	0	0	0	0	0	0.03	0	0	0	0	0	0	0	0	0
26371	Ciao1	0.3	0.16	0.35	0.29	0.19	0.3	0.27	0.34	0.21	0.1	0.2	0.19	0.09	0.3	0.18	0.29	0.33	0.1	0.26	0.11	0.18	0.06	0.15	0.31	0.12	0.18	0.14	0.14	0.16	0.22	0.53	0.13	0.14	0.27	0.14	0.15	0.2	0.27	0.14	0.15	0.04	0.04	0.11	0.25	0.1
68250	Ciao2a	0.03	0.19	0.25	0.16	0.58	0.2	0.31	0.38	0.26	0.02	0.29	0.4	0.29	0.04	0	0.08	0.43	1.21	0.02	0.01	0.02	0.1	0.06	0.74	0.04	0.34	0.76	0.26	0.34	0.35	0.64	0	0.11	0.13	0.39	0.38	0.48	0.67	0.29	0.41	0.17	0.12	0.29	0.07	0.31
68523	Ciao2b	0.24	0.14	0.35	0.29	0.3	0.11	0.06	0.19	0.22	0.1	0.14	0.45	0.11	0.19	0.14	0.25	0.16	0.65	0.21	0.34	0	0	0.28	0.5	0.46	0.91	0.14	0.36	0.45	1.16	1.3	0.81	0.54	0.14	0.33	0.16	0.17	0.26	0.32	0.06	0.07	0.07	0.16	0.7	0
67563	Ciao3	0.07	0.04	0.12	0.12	0.09	0.08	0.07	0.07	0.07	0.09	0.04	0.13	0.08	0.05	0.03	0.01	0.06	0.01	0.01	0.03	0.03	0	0.02	0.31	0.06	0.04	0.07	0.03	0.02	0.12	0.04	0.06	0.06	0.06	0	0.06	0.09	0.3	0.2	0.28	0.06	0.13	0.29	0.13	0.16
109006	Ciapin1	1.01	0.53	0.99	0.36	1.05	0.78	0.42	0.71	0.64	0.62	0.53	0.29	0.66	0.4	0.18	0.14	0.23	0.4	0.86	0.3	0.16	0.99	0.16	0.56	0.4	1.06	0.41	0.86	0.15	0.76	0.47	0	0.78	1.94	2.01	0.11	0.03	0.47	0.53	0	0.02	0.4	0.36	0.39	0.22
229599	Ciart	0	0	0	0	0	0	0	0	0	0	0	0	0	0	0	0	0	0	0	0	0	0	0	0	0	0	0	0	0	0	0	0.99	0	0	0	0	0	0	0	0	0	0	0	0	0
23991	Cib1	0.13	0.1	0.22	0.13	0.13	0.13	0.38	0.23	0.16	0.13	0.05	0.3	0.07	0.09	0.06	0.06	0	0.02	0	0.05	0.58	0.01	0.02	0.14	0	0.02	0.07	0.01	0.01	0	0	0	0	0	0.01	0	0	0	0	0	0.07	0	0	0	0.01
71722	Cic	0	0	0	0	0	0	0	0	0	0.01	0	0	0	0	0	0.01	0	0	0	0	0	0	0	0	0	0	0	0	0.01	0	0	0	0	0	0	0	0	0.01	0.01	0	0	0	0	0	0
12684	Cideb	0	0	0	0	0	0	0.08	0	0.01	0	0	0.02	0	0.1	0.01	0.16	0	0.04	1.91	0.23	0.06	1.2	0.09	0.01	0.25	0.02	2.13	0.25	0.2	0.2	0.12	1.16	0.17	0.23	0.04	0.4	0.27	0.2	0.14	0.48	0.47	0.11	0.24	0.18	0.28
214425	Cilp	0	0	0	0	0	0	0	0	0	0	0	0	0	0	0	0	0	0	0	0	0	0	0	0	0	0	0	0	0	0	0	0	0.04	0	0	0	0	0	0	0	0	0	0	0	0
67236	Cinp	0.07	0	0	0	0	0	0	0	0	0	0	0	0	0	0	0	0	0	0	0	0	0	0	0	0	0	0	0	0	0	0	0	0	0	0	0	0	0	0	0	0	0	0	0	0
224171	Cip2a	0.13	0.15	0.09	0.15	0.12	0.16	0.16	0.03	0.08	0.05	0.01	0.1	0.08	0.04	0.05	0.02	0.01	0.09	0	0	0	0	0	0	0	0	0	0.01	0.01	0	0	0.1	0	0	0	0	0	0	0	0	0.05	0	0	0	0
66935	Cir1	0	0	0.22	0.01	0.01	0.01	0.03	0.03	0.01	0	0.01	0.02	0	0.07	0	0	0	0	0	0	0	0	0	0.01	0	0	0.01	0	0	0	0	0	0	0	0	0	0	0	0	0	0	0	0	0	0
12696	Cirbp	0.07	0.14	0.2	0	0.05	0.02	0.51	0	0	0.22	0.04	0	0.03	0.06	0	0.42	0	0	0.66	0	0.08	0.89	1.28	0.74	2.63	0.71	0.75	2.2	0.09	0.84	1.62	0.15	0.58	0.52	0.68	0.77	0.08	0	0	0	0.15	0.02	0	0	0
52637	Cisd1	1	1.06	0.88	1.44	1.97	1.76	1.81	1.89	2.39	0.97	1.19	2.16	1.69	1.31	0.92	0.63	1.24	4.59	2.28	3.5	2.89	5.72	13.49	7.87	18.58	21.81	12.38	35.25	26.74	26.5	49.43	43.26	35.43	69.47	56.36	37.26	54.15	43.55	42.32	53.41	45.34	61.98	34.19	35.35	36.23
67006	Cisd2	0.33	0.71	0.97	1.2	1.11	0.32	1.63	0.67	0.4	0.2	0.44	0.86	0.34	0.69	0.27	0.34	0.98	1.77	0.79	0.51	0.32	0.51	1.09	0.62	0.78	2.06	2.36	1.73	1.51	0.62	0.58	2.49	3.64	1.12	1.64	0.2	0.66	1.3	0.88	2.14	0.93	1.39	1.13	2.32	1.91
217149	Cisd3	0	0	0	0	0	0	0	0	0	0	0	0	0	0	0	0	0	0.04	0.06	0	0	0.05	0	0.07	0.26	0	0.26	0.22	0.2	0.38	0.44	0	0.3	0.22	0.28	0.17	0.12	1.64	0.56	0.94	0.35	0.56	1.65	0.46	0.72
12704	Cit	0.11	0.11	0.67	0.05	0.16	0.2	0.19	0.07	0.06	0.05	0.09	0.04	0.06	0.13	0.01	0.02	0.02	0.01	0	0	0.01	0.2	0	0	0	0.01	0	0	0.02	0	0	0	0	0	0	0	0	0.01	0	0	0	0	0	0	0
12705	Cited1	0.01	0	0	0	0.13	0.02	0	0.01	0	0	0	0	0	0	0	0	0	0	0	0	0	0	0	0	0	0	0	0	0	0	0	0	0	0	0	0	0	0	0	0	0	0	0	0	0
68379	Ciz1	0.01	0	0.03	0	0	0	0	0.01	0	0	0	0	0	0	0	0	0	0	0	0	0	0	0	0.01	0	0	0	0.01	0	0.06	0	0	0	0	0	0	0	0	0	0	0	0	0	0	0
80986	Ckap2	0.04	0.02	0.01	0	0.02	0.01	0	0	0	0.01	0.02	0	0.01	0.03	0	0	0.01	0	0	0	0	0	0	0	0	0	0	0	0	0	0	0	0	0	0	0	0	0	0	0	0	0	0	0	0
70466	Ckap2l	0.01	0.07	0	0	0	0	0	0	0	0	0	0	0	0	0	0	0	0	0	0	0	0	0	0	0	0	0	0	0	0	0	0	0	0	0.02	0	0	0	0	0	0	0	0	0	0
216197	Ckap4	0.49	0.43	1.31	0.58	0.54	0.41	0.56	1.12	0.7	0.73	0.55	0.65	0.94	0.36	0.91	0.8	0.77	1.52	0.66	0.95	0.77	0.44	1.26	0.91	2.55	1.49	1.12	0.87	2.31	2.92	0.71	0.97	1.39	0.92	1.68	0.51	0.37	1.13	1.74	0.1	0.16	0.02	0.2	0.68	0.02
75786	Ckap5	0.44	0.73	0.57	1.09	0.27	0.34	0.27	0.18	0.31	0.13	0.84	0.2	0.17	0.41	0.06	0.11	0.3	0.17	0.04	0.29	0.08	0.09	0.23	0.07	0.02	0.17	0.09	0.04	0.1	0.12	0.03	0.06	0.13	0.09	0.14	0.05	0.09	0.06	0.06	0	0.02	0.09	0.03	0.06	0.06
12709	Ckb	2.01	0.88	2.74	1.52	1.29	1.64	1.23	1.58	2.17	1.69	1.82	2.18	1.93	1.49	2.49	2.65	2.4	2.59	3.06	3.79	1.94	2.91	3.44	4.69	6.68	5.83	5.55	7.95	5.48	5.98	4.1	10.35	9.04	3.99	3.82	3.73	2.5	3.85	2.72	1.6	1.54	0.73	0.99	1.15	0.7
12715	Ckm	0	0	0	0	0	0	0	0	0	0	0	0	0	0	0	0	0	0	0	0	0	0	0	0	0	0	0	0	0.3	0	0	0	0	0.15	0	0.25	0.1	0	0	0	0	0	0	0	0
12716	Ckmt1	0.01	0.01	0.01	0.01	0.01	0.01	0.01	0.01	0.01	0	0.01	0	0.01	0.01	0.01	0.01	0	0	0.02	0.02	0.02	0	0.02	0.02	0	0.02	0.03	0	0.03	0.04	0	0.06	0.05	0	0	0.02	0.02	0	0.02	0.01	0	0	0	0	0
76722	Ckmt2	0.01	0.01	0.01	0.01	0.01	0.01	0.01	0.01	0.01	0	0.01	0	0.01	0.01	0.01	0.01	0	0	0.02	0.02	0.02	0	0.02	0.02	0	0.02	0.03	0	0.09	0.04	0	0.06	0.05	0	0	0.02	0.02	0	0.02	0.01	0	0	0	0	0
54124	Cks1b	0.4	0.27	1.56	0.03	0.29	0.44	0.11	0.11	0.05	0.04	0.05	0.65	0.91	0.06	0.03	0.04	0.14	0.91	0.03	0.03	1.97	0.72	0	0	0	0.02	0	0.03	0	0.02	0	0	0	0	0	0	0	0	0	0	0	0	0	0	0
624855	Cks1brt	0.27	0.18	1.04	0.02	0.19	0.29	0.07	0.08	0.04	0.03	0.03	0.44	0.61	0.04	0.02	0.03	0.09	0.6	0.02	0.02	1.31	0.48	0	0	0	0.01	0	0.02	0	0.01	0	0	0	0	0	0	0	0	0	0	0	0	0	0	0
66197	Cks2	2.63	2.14	4.16	1.38	2.15	2.59	1.03	0.97	1.5	1.03	1.04	1.87	1.51	0.82	0.98	0.72	0.69	0.59	0.54	0.35	0.47	0	0.9	0.39	0.1	0.64	0.55	0.5	0	0.05	0	0	0.09	0	0	0	0	0	0	0	0	0	0	0	0
76707	Clasp1	0.07	0.07	0.09	0.12	0.14	0.14	0.07	0.04	0.04	0.05	0.07	0.08	0.12	0.1	0.06	0.04	0.06	0.08	0.02	0.11	0.01	0.05	0.01	0.05	0.02	0.04	0.02	0.01	0.04	0.01	0.04	0.15	0.05	0.11	0	0	0.02	0.02	0	0	0	0	0	0.03	0
76499	Clasp2	0.09	0.13	0.16	0.13	0.1	0.16	0.19	0.05	0.08	0.06	0.12	0.04	0.12	0.03	0.02	0.07	0.04	0.02	0.04	0.14	0.02	0.01	0	0.03	0.07	0.03	0.01	0.02	0.01	0.01	0	0.05	0.11	0	0.04	0.01	0.01	0.01	0	0	0.01	0.01	0	0	0.04
53609	Clasrp	0	0	0	0	0	0	0	0	0	0	0	0.05	0	0.01	0	0	0	0	0	0	0	0	0	0	0	0	0	0	0	0	0	0	0	0	0	0	0	0	0	0	0	0	0	0	0
229933	Clca2	0	0	0	0	0	0	0	0	0	0	0	0	0	0	0	0	0	0	0	0	0	0	0	0	0	0	0.01	0	0	0	0	0	0	0	0	0	0	0	0	0	0	0	0	0	0
12722	Clca3a1	0.03	0	0.07	0.01	0.01	0.06	0	0.07	0.11	0.02	0	0.13	0.04	0.04	0.03	0	0.02	0.13	0.1	0.13	0.09	0.12	0.34	0.21	0.55	0.3	0.19	0.14	0.14	0.23	0.16	0.35	0.41	0.1	0.07	0.06	0.04	0.01	0.01	0.02	0	0	0.02	0.01	0.01
80797	Clca3a2	0.03	0	0.06	0.01	0	0.05	0	0.02	0.06	0.02	0	0.11	0.04	0.04	0	0	0.01	0.03	0.09	0.08	0.01	0.09	0.06	0.07	0.45	0.08	0.12	0.1	0.03	0.12	0.13	0.22	0.32	0.03	0.01	0.02	0.04	0	0	0.02	0	0	0	0	0.01
229927	Clca3b	0	0	0	0	0	0	0	0.01	0	0	0	0	0	0	0	0	0	0	0.03	0.01	0.01	0.01	0.03	0.07	0.24	0.03	0.03	0	0	0.02	0.01	0.02	0.2	0	0	0	0.01	0	0	0	0	0	0	0	0
229725	Clcc1	0.07	0.07	0.12	0.08	0.07	0.05	0.15	0.09	0.1	0.08	0.1	0.19	0.1	0.09	0.14	0.14	0.06	0.29	0.2	0.23	0.11	0.08	0.13	0.19	0.25	0.27	0.17	0.43	0.38	0.54	0.38	0.77	0.54	0.79	1.64	0.64	0.46	0.63	0.57	0.45	0.15	0.16	0.28	0.32	0.17
56708	Clcf1	0	0	0	0	0	0	0	0	0	0	0	0	0	0	0	0	0	0	0	0	0	0	0	0	0	0	0	0	0	0	0	0	0	0	0	0	0	0	0	0	0.18	0	0	0	0
12724	Clcn2	0	0	0	0	0	0	0.03	0	0.01	0	0	0	0	0	0	0	0	0.01	0	0	0	0	0	0	0.01	0	0	0	0	0	0	0	0	0	0.01	0	0	0	0	0	0	0	0.01	0	0
12725	Clcn3	0.01	0	0	0	0	0	0	0	0	0.01	0.01	0.01	0.01	0.01	0	0.03	0.01	0	0	0	0	0	0.02	0.01	0.02	0.01	0.01	0.03	0	0	0.03	0.01	0.02	0.01	0.01	0.01	0.01	0	0	0	0	0	0	0	0
12727	Clcn4	0	0	0	0	0	0	0	0	0	0	0	0	0	0	0	0	0	0	0	0	0	0	0	0	0	0	0	0	0.04	0	0	0	0	0	0	0	0	0	0	0	0	0	0	0	0
12728	Clcn5	0	0	0	0	0	0.01	0.02	0	0	0.01	0.01	0	0	0	0	0.01	0.03	0	0	0	0	0	0	0	0.01	0	0	0	0	0	0	0	0	0	0	0	0	0	0	0	0	0	0	0	0
26373	Clcn7	0	0	0	0	0	0	0	0	0	0	0	0	0	0	0	0	0	0	0	0	0	0	0	0	0	0	0.02	0.01	0.01	0	0	0.01	0	0.01	0.01	0	0	0	0	0	0	0	0	0	0
12733	Clcnka	0	0	0.01	0	0	0	0	0	0	0	0	0	0	0	0	0	0	0	0	0.02	0	0	0	0	0.02	0	0	0.03	0	0.03	0	0	0	0.01	0	0.01	0	0.01	0	0	0.01	0	0	0.01	0
12737	Cldn1	0	0	0	0	0	0	0.01	0.2	0.15	0.07	0.1	0.25	0.08	0.09	1.04	0.25	0.19	1.05	0.28	0.41	1.08	0.17	0.28	0.28	0.37	0.42	0.3	0.38	0.19	0.39	0.24	1	0.31	0.39	0.02	0.25	0	0.62	0.25	0	0.12	0.06	0.13	0.13	0.15
64945	Cldn12	0	0	0	0	0	0	0	0	0	0	0	0	0	0	0	0	0	0	0	0	0	0	0	0	0	0	0	0.01	0	0	0	0	0.82	0	0.02	0.04	0	0	1.1	0.04	0	0	0	0.08	0.02
57255	Cldn13	0	0	0.08	0.16	0.12	0.07	0.21	0.01	0.08	0.05	0	0.1	0	0.01	0.12	0.08	0	0.05	0.04	0	0	0	0	0	0	0	0	0	0	0	0	0	0	0	0	0	0	0	0	0	0	0	0	0	0
56173	Cldn14	0	0	0	0	0	0	0	0	0	0	0	0	0	0	0	0	0	0	0.01	0	0	0	0	0	0	0	0	0	0	0	0	0	0	0	0	0	0.13	0	0	0	0	0	0	0.01	0
12738	Cldn2	0	0	0	0	0	0	0	0	0	0	0	0	0	0	0	0	0	0	0	0	0	0	0	0	0	0	0	0	0	0	0	0	0	0	0	0	0	0	0	0	0	0	0.03	0	0
12739	Cldn3	0	0	0	0	0	0	0	0	0	0	0	0	0.04	0	0	0	0	0	0.02	0	0	0.09	0.26	0.09	0	0.51	0.32	0.28	0.48	0.47	0.27	0.77	0.82	1.43	1.51	1.62	0.45	1.5	1.02	0.19	1.27	0.89	0.58	0.64	0.77
12741	Cldn5	0	0	0	0	0.22	0	0	0	0	0	0	0.11	0	0	0	0	0	0	0	0	0.19	0	0	0	0	0	0	0	0	0.54	0	0	0.19	0	0	0	0	0.34	0.36	0	0	0	0	0	0
224250	Cldnd1	0	0	0.11	0	0	0.02	0.01	0	0	0	0.01	0	0	0	0	0	0.05	0	0	0	0	0	0	0	0	0.03	0	0	0	0	0	0	0	0.04	0	0	0	0	0	0	0	0	0	1.34	0
20256	Clec11a	0	0	0	0	0	0	0	0	0	0	0	0	0	0	0	0	0	0	0	0	0	0	0.04	0.21	0	0	0	0.01	0	0	0.01	0	0	0	0	0	0	0	0	0	0	0	0	0	0
232413	Clec12a	0	0	0	0	0	0	0	0	0	0	0	0	0	0	0	0	0	0	0.01	0	0	0	0	0	0	0	0	0	0	0	0	0	0	0	0	0	0	0	0	0	0	0	0	0	0
66864	Clec14a	0	0	0	0	0	0	0	0.01	0	0	0	0	0	0	0	0	0	0	0	0	0	0	0	0	0	0	0	0	0	0	0	0	0	0	0	0	0.03	0	0	0	0	0	0	0	0
74374	Clec16a	0	0	0	0	0.04	0	0	0.13	0.01	0	0	0	0	0	0	0	0	0	0	0.02	0	0	0.01	0	0	0	0	0	0	0	0	0	0	0	0	0	0	0	0	0	0	0	0.03	0	0
56760	Clec1b	0	0.78	0	0	0.01	0	0.32	0.01	0.18	0.01	0.17	0.01	0	0.27	1.16	0.12	0.01	0.01	0	0.01	0.11	0.04	0	0.04	0.06	0	0.23	0	0.08	0	0.02	0	0.25	0.23	0.22	0	0.03	0	0.03	0	0	0	0.02	0.03	0
93694	Clec2d	0	0	0	0	0	0	0	0.02	0	0	0	0.01	0	0	0.01	0	0.02	0.06	0.04	0.11	0.02	0.03	0.26	0.03	0.04	0.12	0.08	0	0.05	0.12	0.06	0.09	0.1	0.2	0	0.08	0.32	0.71	0.17	0.16	0.52	0.32	0.2	0.43	0.53
70809	Clec2g	0	0	0	0	0	0	0	0	0	0	0	0	0	0	0.01	0	0	0.02	0.02	0.02	0.02	0.02	0	0.01	0.04	0.03	0	0	0	0.03	0	0	0.02	0	0	0	0.03	0	0	0	0	0	0	0	0
677440	Clec2j	0	0	0	0	0	0	0	0	0	0	0	0	0	0	0	0	0	0	0.02	0.04	0	0	0.18	0	0	0	0	0	0	0	0	0	0	0	0	0	0.16	0.46	0	0.14	0.48	0.3	0.13	0.39	0.49
21922	Clec3b	0	0	0	0	0	0	0	0	0	0	0	0	0	0	0	0	0	0	0	0	0	0	0	0	0	0	0	0	0	0	0.04	0	0	0.13	0.04	0	0.08	0.17	0.15	4.58	0.09	0.05	0.11	0	0
51811	Clec4f	0	0	0	0	0	0	0	0.09	0.06	0.02	0.01	0.3	0	0.05	0.2	0.17	0.18	0.85	1.11	0.38	0.31	0.44	0.76	0.76	0.91	1	0.86	2.1	1.21	1.63	1.07	1.38	2.42	1.27	1.18	1.43	1.09	1.64	4.33	0.86	0.48	1.74	3.75	0.78	0.57
75863	Clec4g	0	0	0	0	0	0	0	0	0	0	0	0	0	0	0	0	0	0.02	0	0	0	0	0	0	0	0	0.01	0	0.17	0.36	0.03	0	0.2	0	0.13	0.28	0.09	0.06	0.12	0	0.32	0.27	0.02	0	0
56620	Clec4n	0	0	0	0	0	0	0	0.01	0.02	0.01	0.06	0.02	0	0	0.02	0	0.02	0	0.01	0	0	0	0	0.01	0	0	0.02	0.03	0	0.03	0	0	0	0	0	0	0	0	0	0	0	0	0	0	0
23845	Clec5a	0	0	0	0	0	0	0	0	0	0	0	0	0	0	0	0	0	0	0	0.03	0	0	0	0	0	0	0	0	0	0	0	0	0	0	0	0	0	0	0	0	0	0	0	0	0
56644	Clec7a	0	0	0	0	0	0	0.01	0	0	0	0	0.01	0	0	0	0.21	0	0	0	0	0	0	0	0	0	0	0	0	0	0	0	0	0	0	0	0	0	0	0	0	0	0	0	0	0
232414	Clec9a	0	0	0	0	0	0	0	0	0	0	0	0	0	0	0	0	0	0	0	0	0	0	0	0	0	0	0	0	0	0	0	0	0	0	0	0	0	0	0	0	0	0.05	0	0	0
114584	Clic1	5.92	5.22	9.19	4.5	4.89	7.35	5.25	5.58	5.6	3.17	3.85	4.69	4.98	4.08	4.17	3.91	6.43	5.9	4.82	6.44	6.4	5.52	6.01	4.94	7.96	9.51	5.6	5.88	5.16	6.87	6.3	9.65	7.22	3	4.45	2.59	1.44	2.86	1.89	1.1	1.75	1.28	1.2	1.34	1.18
29876	Clic4	5.56	3.91	8.7	4.47	6.5	7.94	6.64	6.45	6.98	3.93	3.42	5.77	2.81	4.35	4.84	3.04	2.39	8.06	1.82	5.08	4.85	1.87	5.5	3.27	4.41	3.62	7.18	3.7	4.91	5.65	4.71	5.14	5.54	3.56	3.74	6.03	3.54	5.62	4.6	2.13	3.57	3.47	4.06	3.82	3.05
224796	Clic5	0.01	0	0	0.15	0	0	0.12	0	0	0.01	0	0	0	0.01	0.12	0	0.09	0.02	0.01	0	0.06	0	0.28	0.01	0	0	0.03	0.41	0.02	0.01	0	0.18	0.17	0.01	0	0.13	0	0	0	0.02	0	0.02	0	0.04	0.05
209195	Clic6	0	0	0	0.07	0	0	0.05	0	0	0	0	0	0	0	0.06	0	0.04	0.01	0	0	0.03	0	0.13	0	0	0	0.01	0	0	0.01	0	0.08	0.07	0.01	0	0.06	0	0	0	0.01	0	0.01	0	0.02	0.02
216705	Clint1	1.44	1.46	3.22	0.75	2.04	2.06	1.24	2.22	1.93	0.89	1.17	1.74	1.36	0.81	2.2	1.1	0.99	2.82	1.82	2.02	2.76	0.63	2.07	2.65	1.55	2.31	1.94	2.34	2.2	3.43	1.66	3.18	3.28	3.08	2.11	3.21	1.49	2.01	1.52	0.36	1.35	1.42	0.85	1.01	1.58
56430	Clip1	0.12	0.06	0.39	0.07	0.07	0.06	0.11	0.09	0.21	0.17	0.09	0.19	0.05	0.07	0.07	0.04	0.22	0.09	0.1	0.06	0.03	0.06	0.15	0.06	0.09	0.4	0.14	0.1	0.09	0.17	0.11	0.18	0.38	0.17	0.18	0.11	0.07	0.23	0.1	0.01	0.13	0.02	0.04	0.06	0.15
269713	Clip2	0.05	0.02	0.08	0.05	0	0.09	0.06	0.02	0.04	0	0.04	0.01	0.01	0.02	0.01	0	0	0.01	0.03	0.01	0	0	0.01	0.01	0.01	0	0	0.02	0.01	0.03	0.01	0.01	0.02	0	0.06	0	0.01	0	0	0	0	0.04	0	0	0.02
76686	Clip3	0	0	0	0.07	0	0	0	0	0	0	0	0	0	0	0	0.01	0	0	0	0	0	0	0	0	0	0.21	0	0	0	0	0	0	0	0	0	0	0	0	0	0	0	0	0	0	0
12747	Clk1	0	0	0	0	0	0	0	0	0	0	0	0	0	0	0	0	0	0	0	0	0	0	0	0	0	0	0	0	0	0	0	0	0.01	0	0	0	0	0	0	0	0	0	0	0	0
102414	Clk3	0.02	0.25	0.04	0.06	0.06	0.02	0.15	0.1	0.1	0.01	0.22	0.06	0.26	0.04	0.03	0.04	0.15	0.01	0	0.02	0.03	0	0	0.01	0.01	0.01	0	0.01	0.04	0.01	0.01	0	0.01	0	0.01	0	0	0	0.01	0	0	0.01	0.01	0.01	0.01
94040	Clmn	0	0	0	0	0	0	0	0	0	0	0	0	0	0	0	0.06	0	0.2	0.01	0.02	0	0.16	0.29	0.02	0.27	0.02	0.03	0.04	0.05	0.06	0.08	0.2	0.04	0.17	0.1	0.08	0.22	0.05	0.13	0.05	0.52	0.19	0.24	0.09	0.11
12752	Cln3	0	0	0	0	0	0	0	0	0	0	0	0	0	0	0	0	0	0	0	0	0	0	0	0	0.01	0	0	0	0	0	0	0	0	0	0	0	0	0	0	0	0	0	0	0	0
211286	Cln5	0	0	0	0	0	0.02	0	0	0	0	0	0.04	0	0.01	0	0	0.01	0	0	0	0	0.01	0	0.09	0.2	0	0.01	0.03	0	0	0	0.03	0	0	0	0	0	0	0	0	0	0	0.01	0	0
76524	Cln6	0	0.03	0	0.06	0.03	0.02	0.04	0.04	0.06	0.01	0.04	0.03	0.01	0.03	0	0	0.02	0.04	0	0.01	0.04	0.02	0.02	0.02	0.03	0	0.05	0.03	0	0	0	0	0.05	0	0	0	0	0.07	0	0	0	0	0	0	0
26889	Cln8	0	0	0	0	0	0	0	0.01	0	0	0	0	0	0	0	0	0	0	0.02	0	0	0	0	0.03	0	0	0	0	0	0	0	0	0	0	0	0	0	0	0	0	0	0	0.04	0	0
27278	Clnk	0.01	0.02	0.02	0.02	0.02	0.02	0	0.01	0.01	0.03	0.01	0.01	0.04	0	0.01	0.03	0	0.02	0.03	0.02	0.03	0.02	0.06	0	0	0	0.02	0	0.01	0.05	0	0	0.1	0	0	0.02	0	0.01	0	0	0	0	0	0.01	0.01
12729	Clns1a	0.67	0.22	4.59	0.6	1.67	0.86	0.24	0.95	0.63	0.4	0.1	0.63	0.5	0.24	0.79	0.1	0.21	1.03	0.01	0	0.29	0.02	0.26	1.22	0.12	0.15	0.52	0.12	0.21	0.64	0	0.06	0.24	0	0.04	0.3	0	0.23	0.25	0.29	0.1	0.08	0.08	0.26	0.3
12753	Clock	0	0	0	0	0	0	0	0	0	0	0	0	0	0	0	0	0	0	0	0	0	0	0	0	1.52	0	0	0	0	0	0	0	0	0	0	0	0	0	0	0	0	0	0	0	0
98985	Clp1	0.05	0.08	0.13	0.05	0.04	0.07	0.03	0.07	0.01	0.06	0.08	0.06	0.12	0.03	0.02	0.05	0	0	0.02	0.02	0	0	0	0	0	0.02	0	0	0	0.05	0	0	0	0	0	0	0	0	0	0	0	0.01	0	0	0
20480	Clpb	0.1	0.06	0.21	0.09	0.22	0.05	0.05	0.2	0.28	0.06	0.15	0.22	0.04	0.05	0.22	0.08	0.06	0.22	0.1	0.18	0.52	0.06	0.16	0.23	0.41	1.83	0.68	0.28	0.5	0.47	0.79	4.86	1.09	0.79	1.01	1.02	0.24	1.6	1.16	0.11	0.42	0.13	0.48	0.97	0.62
53895	Clpp	1.26	1.85	1.5	0.63	0.46	0.95	1.11	0.69	0.64	1.3	1.35	0.84	1.39	0.6	0.42	1.81	1	1.22	1.99	1.1	0.37	1.3	2.09	1.85	1.26	1.84	1.9	2.79	1.64	1.5	1.73	1.44	2.51	2.5	1.99	1.25	1.34	1.89	1.94	2.43	3.53	2.99	2.82	2.83	3.24
109791	Clps	0	0	0	0	0	0	0	0	0	0	0	0	0	0	0	0.61	0.99	0.58	0	0	0	0	0	0	0	0	0.29	0	0	0	0	0	0.17	0	0	0	0	0	0	0	0	0	0	0	0
56457	Clptm1	0.42	0.34	0.58	0.44	0.2	0.17	0.33	0.24	0.18	0.26	0.41	0.28	0.29	0.27	0.57	0.29	0.36	1.65	0.25	0.29	0.18	0.24	0.4	0.11	0.96	0.69	0.86	0.64	0.89	0.86	0.67	0.68	0.99	2.15	0.54	0.52	0.31	0.2	0.44	0.3	0.36	0.33	0.37	0.47	0.58
218335	Clptm1l	0.01	0.02	0.11	0.03	0.01	0.01	0.02	0.02	0.01	0.02	0.02	0	0.02	0.01	0.01	0.02	0.03	0	0	0.02	0	0.01	0.03	0.01	0.14	0.06	0.02	0.02	0.16	0	0.05	0.13	0.11	0.05	0.04	0.01	0	0.06	0.04	0.02	0.01	0.01	0.04	0.05	0.03
270166	Clpx	0.29	0.19	0.34	0.28	0.34	0.21	0.33	0.34	0.31	0.29	0.16	0.33	0.34	0.19	0.57	0.46	0.27	0.73	0.46	0.59	0.62	0.54	2.13	1.1	3	3	1.69	1.15	2.29	2.03	2.45	2.47	2.02	3.23	2.5	1.78	2.1	1.88	1.31	2.41	1.18	2.54	1.71	2.07	1.94
269582	Clspn	0.01	0.01	0.06	0.04	0.03	0.06	0.02	0	0.14	0.01	0.01	0.01	0	0.01	0.01	0	0	0	0	0	0	0	0	0	0	0	0	0	0	0	0	0	0	0	0	0	0	0	0	0	0	0	0	0	0
65945	Clstn1	0.01	0	0	0	0	0	0	0	0.01	0	0.01	0	0	0	0	0	0	0	0	0	0	0	0	0	0	0	0	0	0	0	0	0	0	0	0.01	0	0	0	0	0.01	0	0	0	0	0
232370	Clstn3	0	0	0	0	0	0	0	0	0	0	0	0	0	0	0	0	0	0	0	0	0	0	0.01	0	0	0	0	0	0	0	0	0	0	0	0	0	0	0	0	0	0	0	0	0	0
12757	Clta	6.48	6.17	13.17	5.88	4.14	6.26	6.65	4.18	4.13	7.67	5.19	5.54	7.8	4.85	6.1	8.01	5.13	9.57	12.52	10.38	13.59	9.12	9.06	10.58	10.37	18.74	12.27	24.53	9.64	14.5	24.48	24.78	13.87	12.17	13.9	14.06	2.7	5.8	10.25	1.79	9.86	6.93	8.79	4.16	6.67
74325	Cltb	1.44	1.65	2.06	1.34	1.8	1.47	1.21	1.75	1.5	0.86	1.03	1.22	2.06	1.63	0.85	0.77	1.28	1.83	2.39	2.71	1.1	1.86	3.81	2.64	2.93	6.91	2.21	4.61	2.2	3.91	7.17	6.53	6.23	6.25	6.53	5.5	4.6	7.88	5.83	8.1	7.14	7.67	8.21	5.38	4.96
67300	Cltc	5.99	5.28	7.91	6.7	5.66	5.41	6.12	7.18	5.31	6.67	5.89	8.31	6.01	5.33	6.71	9.34	6.97	10.06	8.4	11.35	7.57	8.38	12.21	8.16	17.91	13.39	13.07	16.88	13.83	13.96	17.83	17.8	14.04	17.14	15.28	15.1	11.31	14.87	12.7	11.07	10.83	6.9	8.57	8.33	8.34
12759	Clu	0.22	0.1	0.44	0.29	0.52	0.6	0.62	0.65	0.19	0.2	0.26	0.06	0.05	0.01	0.28	0.48	0.35	0.29	0.05	0.51	0.98	0.09	0.78	0.2	0.75	1.28	0.67	0.95	0.71	0.39	0.5	1.14	1.7	1.22	1.12	1.17	1.23	1.99	1.38	1.47	1.84	0.62	1.96	2.09	1.72
76779	Cluap1	0	0	0.03	0.05	0	0.02	0.02	0	0	0	0	0.11	0.03	0	0	0	0	0	0	0	0	0	0	0	0	0	0	0	0	0	0	0	0	0	0	0	0	0	0	0	0	0	0	0.17	0
74148	Cluh	0.9	1.98	1.4	2.8	1.56	3.28	1.56	1.36	1.32	3	2.17	2.1	1.85	2.29	0.73	2.96	3.21	1.12	1.7	1.84	0.73	3.64	3.64	3.95	3.58	3.44	3.94	3.86	2.55	3.22	3.79	5.81	3.01	4.79	3.01	3.67	3.69	4.11	2.58	3.24	2.48	1.92	1.75	1.52	1.86
74438	Clvs1	0	0	0	0	0	0	0	0	0	0	0	0	0	0	0	0	0	0	0	0	0	0	0	0	0	0	0	0	0	0	0	0	0	0	0	0	0	0.1	0	0.08	0	0	0	0	0
69634	Clybl	0.13	0.06	0.38	0.3	0.2	0.18	0.41	0.33	0.28	0.14	0.3	0.15	0.2	0.25	0.42	0.25	0.25	0.71	0.64	1.21	0.68	0.73	1.06	0.9	2.12	1.36	1.27	3.59	1.31	3.61	4.81	3.32	2.62	4.95	5.88	5.04	2.97	4.74	3.4	4.3	5.11	5.55	2.84	5.46	4.81
12763	Cmah	0	0	0	0	0	0	0	0	0	0	0	0	0	0	0	0	0	0	0	0	0	0	0	0	0	0.01	0.02	0.01	0.2	0.39	0.02	0.07	0.05	0.15	0.26	0.38	0.76	0.65	0.71	0.5	0.37	0.46	0.53	0.54	0.51
12764	Cmas	0.6	0.56	0.18	0.26	0.38	0.36	0.34	0.27	0.45	0.34	0.28	0.64	0.39	0.39	0.42	0.34	0.37	0.62	0.54	0.36	0.37	0.48	0.96	0.5	1.09	1.12	0.96	0.99	0.65	1.28	1.3	1.72	0.88	1.19	1.05	0.86	0.7	0.88	1.06	1.35	0.91	1.32	0.95	1.39	1.15
69574	Cmbl	0	0	0	0.01	0.05	0.02	0.03	0.38	0.09	0.12	0.11	0.55	0.12	0.05	0.96	0.24	0.5	1.3	1.16	1.98	1.76	1.99	3.43	2.9	6.98	6.42	4.74	6.29	8.46	8.66	13.25	9.64	5.95	8.58	10.02	15.25	8.36	16.17	13.87	10.19	19.7	16.79	19.06	19.2	14.7
67899	Cmc1	0	0.5	0.19	1.3	1	0.11	0.21	0.1	0.17	0	0	0.08	0	0.71	0.66	0.11	0	0.47	0.46	0.18	0.27	0	0.55	0	1.27	0.3	0.17	1.19	0.12	0.36	1.17	0.31	0.18	1.06	3.56	1.55	0.9	0.99	0.74	0	0.16	0.92	0.53	0.76	0.77
66531	Cmc2	0.09	0.39	1.02	0.5	0.35	0	0.48	0.09	0.1	0.06	0.36	2.72	0.11	0.31	0	0.06	0	1.98	0	0.31	0.11	0.05	0	0	0	0.35	0.33	0.26	0	0	0.36	0.83	0.49	0.65	1.42	0.36	0.72	0	0	0.17	0.8	1.03	0.06	0.6	0.64
74440	Cmip	0	0	0.01	0	0	0	0	0	0	0	0	0	0	0	0	0	0	0	0	0	0	0	0	0.01	0	0.05	0.03	0.01	0	0.01	0	0.01	0	0.03	0	0	0	0	0	0	0	0	0	0	0
66588	Cmpk1	3.46	2.45	6.46	3.57	4.48	3.31	2.64	5.15	5.71	3.35	4.23	3.9	3.62	2.43	5.14	4.34	2.63	7.71	6.3	6.57	6.76	5.13	7.97	8.59	7.78	11.19	6.32	10.27	11.62	7.93	14.42	9.95	8.83	7.46	15.64	16.35	12.12	23.42	15.14	16.96	11.45	16.77	26.98	11.89	12.84
22169	Cmpk2	0.1	0.01	0.77	0.24	0.05	0.08	0.12	0.16	0.13	0.11	0.15	0.17	0.1	0.22	0.07	0.13	0.31	0.03	1.19	0.62	0.33	0.1	0.27	1.2	0.15	0.2	1.68	0.36	0.17	3.78	0.27	0.34	0.08	0.14	0	0.22	0.36	4.37	4.24	0.67	0.28	0.26	0.07	4.18	0.66
66497	Cmss1	0.12	0.07	0.33	0.15	0.12	0.06	0.08	0.14	0.07	0.19	0.08	0.05	0.17	0.11	0.05	0.09	0.07	0.15	0	0.03	0.01	0.06	0.06	0.07	0.03	0	0.2	0.02	0.01	0	0	0	0	0	0	0	0	0	0	0	0	0	0	0	0
97487	Cmtm4	0.02	0	0	0.02	0	0	0.05	0	0	0.05	0	0	0	0	0	0.07	0.06	0	0.11	0	0	0	0.1	0.1	0.2	0.2	0	0	0.03	0.06	0.27	0	0.12	0	0	0	0	0	0	0	0	0.04	0.21	0	0.2
67213	Cmtm6	0	0	0	0	0.05	0.05	0	0.07	0.05	0	0	0.04	0	0	0	0	0	0.09	0	0.05	0	0	0	0.07	0	0	0.1	0.24	0.06	0.55	0.12	0	0	0	0.02	0.2	0.12	0	0	0	0.12	0	0.21	0.16	0.19
102545	Cmtm7	0.06	0	0	0	0	0	0.02	0.02	0	0.04	0.02	0.01	0	0	0.03	0	0.06	0	0	0.14	0	0	0	0	0.05	0.07	0.01	0	0	0	0	0.1	0	0	0	0	0	0	0	0	0	0	0	0	0
70031	Cmtm8	0	0	0	0	0	0	0	0.06	0.05	0	0	0	0	0	0	0.03	0	0	0.04	0	0.08	0	0.09	0	0.11	0	0.15	0.05	0.05	0	0	0	0.26	0	0	0	0.08	0.28	0.25	0.11	0	0	0	0	0
76469	Cmya5	0	0	0	0	0	0	0	0	0	0	0	0	0	0	0	0	0	0	0	0	0	0	0	0	0	0	0	0	0.01	0	0	0	0	0	0	0	0	0	0	0	0	0	0	0	0
12785	Cnbp	5.1	6.31	2.67	5.48	2.43	2.14	5.53	1.24	1.31	3.29	3.43	6.72	4.18	3.94	7.2	3.3	4.19	10.15	3.39	5.03	10.23	3.24	6.6	1.61	8.18	7.4	0.57	6.62	2.48	2.22	7.58	6.51	0.68	5.92	4.02	4.45	4.59	0.61	0.47	3.94	2.48	1.96	0.35	0.34	0.63
66054	Cndp2	2.43	1.07	3.42	1.18	3.31	2.1	1.62	3.56	2.85	3.68	2.16	2.71	1.87	1.8	2.95	2.85	2.26	3.91	3.74	3.39	3.4	3.85	4.91	5.11	11.13	11.41	5.72	5.77	7.41	7.81	8.64	17.67	7.86	9.6	6.56	6.19	7.09	10.76	10.16	9.39	10.36	6.43	5.49	7.94	8.49
382030	Cnep1r1	0.04	0	0	0	0.02	0	0	0	0	0	0	0	0	0	0	0	0	0	0	0	0	0	0	0.06	0	0	0	6.38	0	0.02	0.13	0	0	0	0.06	0	0	0	0	0	0.08	0	0	0	0
333329	Cngb1	0	0	0	0	0	0	0	0	0	0	0	0	0	0	0	0.01	0	0	0.01	0	0	0	0	0	0	0	0	0	0	0	0	0	0	0	0	0	0	0	0	0	0	0	0	0	0
98417	Cnih4	0	0	0.1	0.12	0.49	0.1	0	0	0	0.07	0.07	0.08	0.07	0	0	0	0.08	0	0	0	0.12	0	0.13	0	0.44	0.54	0	0.22	0	0	0	0.18	0.39	0.27	0.29	0.29	0	0	0	0	0.3	0	0	0.22	0.04
12797	Cnn1	0	0	0	0	0	0	0	0	0	0	0	0	0	0	0	0	0	0	0	0	0	0	0	0	0	0	0	0	0	0	0	0	0.04	0	0.26	0	0	0	0	0	0	0	0	0	0
12798	Cnn2	1.42	1.27	2.85	1.35	1.64	1.76	0.5	0.93	0.59	0.26	0.46	0.75	1.15	0.79	1.09	0.17	0.88	1.58	1.26	0.51	0.73	0.21	3.13	0.5	1.56	0.71	2.73	1.36	0.66	2.44	0.92	0.57	3.6	0.14	0.56	0.1	0.74	0.42	1.25	0.24	0.21	0.24	0.27	0.16	0.13
71994	Cnn3	1.23	1.68	2.95	1.21	1.64	2.3	1.33	1.34	2.19	1	1.19	1.39	1.55	1.55	2.16	1.35	1.47	3.12	1.38	1.5	0.98	0.82	3.51	2.45	3.93	2.92	3.12	1.38	1.9	3.41	3.28	3.35	3.22	1.35	2.3	2.74	5.06	6.75	5.95	2.66	1.29	2.02	2.58	2.13	2.03
94219	Cnnm2	0	0	0	0	0	0	0	0	0	0	0	0	0	0	0	0	0	0	0	0	0	0	0	0	0	0	0	0	0.16	0	0	0	0	0	0	0	0	0	0	0	0	0.06	0	0	0
94218	Cnnm3	0	0	0.01	0	0	0.01	0	0	0	0	0	0	0.01	0	0	0	0	0	0	0	0.01	0	0	0	0.01	0	0	0	0	0	0	0	0	0.02	0.01	0	0	0	0	0	0	0	0.01	0	0
[truncated: 9,985 more rows]

## Sheet: Sheet2
Gene.ID	GeneSymbol	E12.5.1.Exp018736	E12.5.2.Exp018737	E12.5.3.Exp018738	E13.5.1.Exp018739	E13.5.2.Exp018740	E13.5.3.Exp018741	E14.5.1.Exp018742	E14.5.2.Exp018743	E14.5.3.Exp018744	E15.5.1.Exp018745	E15.5.2.Exp018746	E15.5.3.Exp018747	E16.5.1.Exp018748	E16.5.2.Exp018749	E16.5.3.Exp018750	E17.5.1.Exp018751	E17.5.2.Exp018752	E17.5.3.Exp018753	E18.5.1.Exp018754	E18.5.2.Exp018755	E18.5.3.Exp018756	D1.1.Exp018757	D1.2.Exp018758	D1.3.Exp018759	D3.1.Exp018760	D3.2.Exp018761	D3.3.Exp018762	D5.1.Exp018763	D5.2.Exp018764	D5.3.Exp018765	W1.1.Exp018766	W1.2.Exp018767	W1.3.Exp018768	W2.1.Exp018769	W2.2.Exp018770	W2.3.Exp018771	W3.1.Exp018772	W3.2.Exp018773	W3.3.Exp018774	W6.1.Exp018775	W6.2.Exp018776	W6.3.Exp018777	W8.1.Exp018778	W8.2.Exp018779	W8.3.Exp018780
269423	Abhd18	0	0	0	0	0	0	0	0	0	0	0	0	0	0	0	0	0	0	0	0	0	0	0	0	0	0	0.09	0	0	0	0	0	0	0	0	0	0	0	0	0	0	0	0	0	0
230234	Abitram	0.18	0.11	0.36	0.09	0.19	0.19	0.13	0.01	0.1	0.04	0.07	0.07	0.12	0.13	0.11	0	0.13	0.04	0	0.16	0	0	0	0	0	0	0.14	0	0	0	0	0	0.12	0.04	0	0	0	0	0	0	0	0	0	0	0
70681	Abraxas1	0	0	0	0	0	0.15	0	0	0	0	0	0	0.01	0	0	0	0	0	0	0	0	0	0	0	0	0	0	0	0	0	0	0	0	0	0	0	0	0	0	0	0	0	0	0	0
109359	Abraxas2	0	0	0.08	0.06	0.1	0	0.08	0	0	0.03	0	0	0	0.03	0.09	0.07	0	0.19	0.1	0	0.29	0	0	0.22	0	0.13	0.34	0	0.46	0.2	0	0	0.41	0.2	0.29	0	0.28	0.42	0.26	0.16	0.52	0	0.36	0.32	1.46
13733	Adgre1	0	0	0	0.03	0	0	0.03	0.1	0.06	0.04	0.06	0.16	0.18	0.03	0.1	0.07	0.05	0.1	0.07	0	0.06	0.04	0	0.03	0.09	0	0.03	0.2	0.05	0.31	0	0.08	0.54	0	0	0	0	0	0	0	0	0	0	0	0
26364	Adgre5	0.01	0	0	0.01	0.03	0	0	0.05	0.72	0.03	0	0.03	0.02	0.01	0.03	0.05	0.09	0.01	0	0.1	0.05	0	0.03	0.05	0.06	0.1	0.05	0.06	0	0.1	0	0.06	0.07	0.06	0	0	0	0	0	0	0	0	0	0	0
14766	Adgrg1	0.03	0.05	0.02	0.03	0	0.07	0.04	0	0	0.03	0	0	0	0.07	0	0	0	0	0	0.02	0	0.11	0	0	0	0	0	0.02	0	0	0	0	0	0	0	0	0	0	0	0	0	0	0	0	0
99633	Adgrl2	0	0	0	0	0	0	0	0	0	0	0	0	0	0	0	0	0	0.02	0	0	0	0	0	0	0	0	0	0	0	0	0	0	0	0	0	0	0	0.03	0.05	0	0	0	0	0	0
17356	Afdn	0.02	0.28	0.07	0.03	0.08	0.04	0.01	0.04	0.05	0.02	0.01	0.04	0.01	0.01	0.03	0.02	0.03	0.08	0.03	1.27	0.08	0.03	0.22	0.09	0.15	0.18	0.13	0.09	0.11	0.3	0.12	0.26	0.15	0.17	0.14	0.09	0.13	0.1	0.09	0.12	0.21	0.21	0.18	0.21	0.2
215951	Afg1l	0	0	0	0	0	0	0	0	0	0	0	0	0	0	0	0	0	0	0	0	0	0	0	0	0	0	0	0	0	0	0	0	0	0	0	0	0	0	0.03	0	0	0.08	0.04	0.15	0.45
232906	Arhgap35	0	0	0	0	0	0	0	0.09	0	0	0	0.01	0	0	0.01	0.06	0.01	0.1	0.01	0.01	0	0	0.01	0.01	0.02	0.01	0.01	0.03	0.06	0.01	0.01	0.02	0.03	0.49	0.14	0.05	0.04	0.01	0.01	0.06	0.02	0.04	0.03	0.02	0.04
70719	Arhgap45	0.08	0.07	0.16	0.04	0.05	0.09	0.1	0.11	0.08	0.11	0.06	0.12	0.08	0.08	0.14	0.05	0.09	0.1	0.06	0.11	0.14	0.05	0.02	0.07	0.12	0.05	0.07	0.16	0.07	0.06	0.09	0	0.1	0.04	0	0.01	0	0	0	0	0	0	0	0.04	0
71617	Armh3	0.01	0	0.02	0	0.24	0	0	0.05	0	0.02	0	0.23	0.02	0	0	0.36	0.02	0.04	0	0	0	0	0.12	0.28	0.08	0.02	0.3	0	0	0	0	0.69	0.82	0	0	0.47	0	0	0	0	0	0.43	0	0	0
73419	Armt1	0.05	0.02	0.11	0.07	0.41	0.98	0.07	0.13	0.05	0.03	0.03	0.04	0.08	0.02	0	0.03	0.05	0	0.03	0.04	0	0.02	0.18	0	0.05	0.06	0.08	0	0.03	0	0.25	0	0.14	0.04	0	0.03	0	0	0.04	0.02	0.06	0.06	0	0.07	0.05
70420	Arpin	0	0.09	0	0	0.14	0.23	0	0	0	0	0.1	0.41	0	0	0	0	0	0	0.12	0	0	0	0	0	0	0	0	0.16	0	0	0	0	0	0.29	0.07	0	0	0	0	0	0	0	0	0.13	0
68118	Atg101	0	0	0	0	0.04	0	0	0	0	0	0	0	0	0	0	0	0	0	0	0	0	0	0	0	0	0	0	0	0	0	0	0	0.07	0	0	0	0	0	0	0	0	0	0	0	0
68876	Atp23	0	0	0	0	0	0	0	0	0	0	0	0.01	0	0	0	0	0	0	0	0	0	0	0	0	0	0	0	0	0	0	0	0	0	0	0	0	0	0	0	0	0	0	0	0	0
70257	Atp5mpl	0	0	0	0	0	0	0	0	0	0	0	0	0	0	0	0	0	0	0	0	0	0	0	0	0	0	20.06	0	0	0	0	0	27.22	0	0	0	0	0	0	0	0	0	39.89	23.21	29.3
68073	Atpsckmt	0	0	0	0	0	0	0	0	0	0	0	0	0	0	0	0	0	0	0	0	0	0	0	0	0	0	0	0	0	0	0	0	0.13	0	0	0	0	0	0	0	0	0	0	0	0
381694	B3glct	0	0	0.04	0	0.05	0	0	0.04	0	0.03	0.01	0.01	0.03	0.01	0	0	0	0	0	0	0	0	0	0.01	0	0	0	0	0	0	0	0	0	0	0	0	0	0	0	0	0	0	0	0	0
108902	B4gat1	0	0	0	0	0.01	0	0	0	0	0	0	0	0	0	0	0	0	0	0	0	0	0	0	0	0	0	0.03	0.33	0	0	0	0	0.05	0	0	0	0	0	0	0	0	0	0	0.12	0
107976	Babam2	0.04	0	0	0	0.08	0	0.03	0.05	0.04	0	0.01	0.12	0	0.07	0.02	0.13	0.07	0.14	0.15	0	0.11	0.06	0.08	0	0.14	0.11	0.11	0.11	0.06	0.1	0.14	0	0.25	0.46	0.14	0	0.16	0.31	0	0.12	0.19	0	0.11	0.18	0.08
63857	Bco1	0	0	0	0	0.02	0.01	0	0	0.03	0.01	0	0	0.3	0.27	0	0.02	0	0	0	0	0	0	0	0.03	0.06	0.09	0.09	0.63	0.05	0.2	0.4	0.54	0.15	0	0.08	0	0	0	0	0	0	0	0	0	0
243842	Bicra	0	0	0.03	0	0	0	0	0	0	0	0	0	0	0	0	0	0	0	0	0	0	0	0	0	0	0	0	0	0	0	0	0	0	0	0	0	0	0	0	0	0	0	0	0	0
67774	Borcs5	0	0	0.21	0	0	0	0	0.07	0	0	0	0	0	0	0	0	0	0	0	0	0	0	0	0	0	0	0	0	0	0	0	0	0	0	0	0	0	0	0	0	0	0	0.26	0.03	0
71923	Borcs6	0	0	0.01	0.02	0	0	0	0.01	0	0	0	0	0	0	0	0	0	0	0.02	0	0	0	0	0	0	0	0.12	0	0	0	0	0	0.19	0	0	0	0	0	0	0	0	0	0	0.02	0
66439	Borcs7	0	0	0	0	0.03	0	0	0	0	0.13	0	0	0	0	0	0	0	0	0	0	0	0	0	0	0	0	0.06	0	0	0	0	0	0	0	0	0	0	0	0	0	0	0	0	0	0
66138	Bud23	0.9	1.04	0	0.26	0.32	0.12	0.74	0	0.68	0.08	0.25	0	0	0.46	0	0	0	0.55	0	0	0	0	0	0	0	0	0	0	0	0	0	0	0.04	0	0	0	0	0	0	0	0	0	0	0	0
50908	C1s1	0	0	0	0	0	0	0	0	0	0	0.01	0.02	0	0	0.03	0	0.04	0.05	0	0.1	0.06	0.06	0	0	0	0	0.01	0.12	0	0.1	0	0.07	0.07	0.18	0.13	0.08	0.07	0	0	0.03	0	0	0	0.05	0.02
68480	Card19	0	0	0	0	0	0	0	0	0	0	0	0	0	0	0	0	0	0	0	0	0	0	0	0	0	0	0	0	0	0	0	0	0	0	0.09	0	0	0	0	0	0	0	0	0.02	0
68732	Carmil1	0	0.01	0.05	0.02	0.02	0.01	0.01	0.02	0.01	0	0.01	0.01	0.01	0	0.02	0.01	0.02	0.03	0.07	0.05	0	0.01	0.09	0.05	0.29	0.05	0.05	0.02	0.08	0.01	0.04	0	0.07	0	0	0	0	0	0	0	0	0	0	0	0
67383	Carnmt1	0.31	0.24	0.56	0.24	0.22	0.16	0.24	0.17	0.11	0.11	0.13	0	0.16	0.24	0.16	0.12	0.14	0.09	0	0.11	0	0.35	0.17	0.06	0	0.14	0.06	0.1	0	0.06	0	0.11	0.06	0	0	0	0	0.09	0	0	0	0	0.02	0.07	0.08
19285	Cavin1	0	0.14	0.07	0.25	0.18	0.15	0.29	0.18	0.11	0.08	0.21	0.35	0.02	0	0.08	0	0.18	0.17	0.43	0.61	0.17	0.83	1.15	1.19	0.48	0.15	0.76	1.3	0.19	0.22	0.69	0.16	0.41	0.43	0.41	0.18	0.28	0	0	0	0	0.19	0.06	0	0
20324	Cavin2	0.11	0.02	0.06	0.08	0.34	0.17	0.04	0.16	0.08	0.22	0.34	0.24	0.16	0.41	0.26	0.22	0.53	0.83	0.21	0.71	0.73	0.68	0.81	0.33	0.14	0.83	1.95	0.07	0.88	0.75	0.05	0.14	0.13	0.13	0.14	0.12	0.59	0.15	0.32	0	0.05	0.05	2.07	0.35	0.15
109042	Cavin3	0	0	0	0	0	0	0	0	0	0	0	0	0	0	0	0	0	0	0	0	0	0	0	0.02	0	0	0.07	0	0	0.02	0	0	1.25	0	0	0	0	0	0	0	0	0	0	0	0
213993	Ccdc186	0.01	0	0	0	0	0.01	0	0	0	0	0	0	0	0	0	0	0	0	0	0	0	0	0	0	0	0	0	0.01	0	0	0	0	0	0	0	0	0	0	0	0	0	0	0	0	0
69109	Ccnq	0	0	0.01	0	0	0	0	0	0	0	0	0	0	0	0	0	0	0	0	0	0	0	0	0	0	0	0	0	0	0	0	0	0	0	0	0	0	0	0	0	0	0	0	0	0
83921	Cemip2	0.02	0.03	0.02	0.01	0.02	0.02	0.07	0.01	0.02	0.02	0.02	0	0.01	0	0.06	0.02	0.02	0.14	0.02	0.02	0.02	0.01	0.03	0.02	0.12	0.03	0.02	0	0	0	0	0.05	0.02	0.01	0	0.03	0.04	0.01	0.01	0	0	0	0	0.02	0
12009	Cep131	0.02	0.01	0.04	0	0.01	0.01	0	0	0.01	0	0.4	0.01	0.01	0	0	0	0	0	0	0	0	0	0	0	0.01	0	0	0	0	0	0	0	0	0	0	0	0	0	0	0	0	0	0	0	0
14894	Cfap20	0	0.19	0	0	0	0.09	0	0	0	0	0	0	0	0	0	0	0	0	0	0	0	0	0	0	0	0	0	0	0	0	0	0	0	0	0	0	0	0	0	0	0	0	0	0	0
216618	Cfap36	0.01	0	0	0	0.02	0.02	0	0	0	0	0.01	0	0	0	0	0	0	0	0	0	0	0	0	0	0	0	0	0	0	0	0	0	0	0	0	0	0	0	0	0	0	0	0	0	0
12654	Chil1	0	0	0	0	0	0	0	0.02	0.01	0	0	0	0	0	0.05	0	0.07	0.15	0.06	0.12	0.09	0	0	0	0	0.02	0	0	0	0	0	0	0	0	0	0	0	0	0	0	0	0	0	0	0
12655	Chil3	0	0	0	0	0	0	0	0.24	0.07	0.04	0.18	0.25	0	0	1.6	0.51	0.56	3.16	7.58	10.08	2.41	1.67	1.77	5.83	2.53	2.19	2.91	18.87	1.63	2.99	4.88	0.96	1.15	0.06	0.1	0.1	0.12	0.1	0.06	0.08	0.03	0	0.08	0.12	0.1
104183	Chil4	0	0	0	0	0	0	0	0	0	0	0	0	0	0	0	0	0	0	0	0	0	0	0	0	0	0	0	0	0	0	0	0	0	0	0.22	0	0	0	0	0	0	0	0	0	0
68250	Ciao2a	0	0.19	0.25	0.16	0.58	0.2	0.31	0.38	0.26	0	0.29	0.4	0.29	0.04	0	0	0.43	1.21	0	0	0	0	0	0.74	0	0.34	0.76	0.26	0.34	0.35	0.64	0	0.11	0	0.39	0.38	0.48	0.67	0.29	0.41	0	0.12	0.29	0	0.31
68523	Ciao2b	0	0.14	0.35	0.29	0.3	0.11	0.06	0.19	0.22	0	0	0.45	0	0	0.14	0	0	0.65	0.21	0.34	0	0	0	0.5	0.46	0.91	0.14	0.36	0.45	1.16	1.3	0.81	0.54	0.14	0.33	0	0.17	0.26	0.32	0	0	0	0.16	0	0
67563	Ciao3	0.07	0.04	0.12	0.12	0.09	0.08	0	0.07	0.07	0.09	0.04	0.13	0.08	0.05	0.03	0	0.06	0	0.01	0	0.03	0	0	0.31	0.06	0.04	0.07	0.03	0	0.12	0.04	0.06	0.06	0.06	0	0.06	0.09	0.3	0.2	0.28	0.06	0.13	0.29	0.13	0.16
224171	Cip2a	0.13	0.15	0.09	0.15	0.12	0.16	0.16	0.03	0.08	0.05	0.01	0.1	0.08	0.04	0.05	0.02	0.01	0.09	0	0	0	0	0	0	0	0	0	0	0	0	0	0	0	0	0	0	0	0	0	0	0	0	0	0	0
12722	Clca3a1	0	0	0	0	0.01	0.06	0	0.07	0.11	0	0	0.13	0.04	0	0.03	0	0.02	0.13	0.1	0.13	0.09	0.12	0.34	0.21	0.55	0.3	0.19	0.14	0.14	0.23	0.16	0.35	0.41	0.1	0	0.06	0.04	0	0	0	0	0	0	0	0
229927	Clca3b	0	0	0	0	0	0	0	0	0	0	0	0	0	0	0	0	0	0	0	0	0	0	0	0.07	0	0	0	0	0	0	0	0	0	0	0	0	0	0	0	0	0	0	0	0	0
224250	Cldnd1	0	0	0.11	0	0	0	0	0	0	0	0	0	0	0	0	0	0	0	0	0	0	0	0	0	0	0	0	0	0	0	0	0	0	0	0	0	0	0	0	0	0	0	0	0	0
58184	Cnot9	0.26	1.22	0.86	1.24	1.03	1.12	0.28	0.59	1.47	0.11	0.26	0.16	0.15	0.77	0.24	0.99	0.13	0.41	0.98	0	0.27	0	0.28	0.12	0.28	1.64	0.24	1.33	1.16	0.08	0.14	1.44	0.59	1.35	2.66	0.26	0	0.55	2.06	0	0	0.08	0.38	0.32	0.24
69893	Coa7	0.21	0	0.16	0.08	0.12	0	0.05	0.15	0	0.14	0	0.25	0.11	0	0.12	0.14	0.12	0.68	0.38	0.55	0.22	0.39	0.58	0.86	0.59	0.73	1.39	0	2.26	0.74	1.1	0.67	1.21	0.58	1.89	0.87	0.57	0.42	0.48	0.31	0.09	1	0.17	0.43	0.22
26374	Cop1	0	0	0	0	0	0.01	0	0	0	0	0	0	0	0	0	0	0	0	0	0	0	0	0	0	0	0	0	0	0	0	0	0	0	0	0	0	0	0	0	0	0	0	0	0	0
67426	Coq8a	0	0	0	0	0.04	0	0	0.1	0.1	0.02	0.02	0.09	0.09	0.03	0.12	0.06	0.13	0.22	0.14	0.19	0.21	0.31	0.09	0.24	0.56	0.15	0.5	0.92	0.91	1.08	3.97	1.28	1.36	9.8	5.86	7.92	10.42	11.54	11.15	7.27	10.81	6.22	5.55	7.63	4.68
76889	Coq8b	0	0	0	0.02	0.02	0.01	0.01	0	0.11	0	0	0.01	0.01	0	0	0	0	0.02	0.01	0.04	0.03	0.02	0.02	0	0.02	0	0.05	0	0.03	0	0.05	0	0.09	0	1.09	0	1	0	0.03	0	0	0.96	0.82	0	0.52
75847	Crppa	0	0	0	0	0	0	0	0	0	0	0	0	0	0	0	0	0	0	0	0	0	0	0	0	0	0	0	0	0	0	2.85	0	0	0	0	0	4.62	0	0	0	0	0	0	0	0
11630	Crybg1	0	0	0	0	0	0	0	0	0	0	0	0	0	0	0	0	0	0	0	0	0	0	0	0	0	0	0.01	0	0.01	0	0	0	0.02	0	0	0	0	0	0	0	0	0	0	0	0
226527	Cryzl2	0	0	0	0	0	0	0	0.06	0	0	0	0.04	0	0	0	0.04	0.06	0.05	0	0.03	0.2	0.03	0	0.08	0.07	0.54	0.05	0.28	0.31	0.79	0.13	0.84	1.41	0.72	0.54	1.25	0.34	0.46	0.32	0.24	0.53	0.29	0.24	0.33	0.45
76770	Csta2	0	0	0	0	0	0.76	0	23.17	11.11	0	6.19	31.19	3.35	3.09	90.8	10.81	40.44	95.02	66.4	30.89	59.9	6.35	0	27.34	17.31	16.17	38.71	10.04	11.3	17.97	14.86	12.86	16.8	0	0.68	0	0	0	0	0	0	0	0	0	0
408196	Csta3	0	0	0	0	0	0	0	6.68	0	0	0	0	0	0	10.24	0	0	19.47	37.14	0	19.85	0	0	0	0	0	0	0	0	0	0	0	0	0	0	0	0	0	0	0	0	0	0	0	0
433016	Cstdc4	1.26	3.05	4.07	2.71	4.65	4.12	10.55	79.32	42.12	23.13	18.12	80.83	21.35	8.34	169.81	37.26	88.08	317.22	154.91	142.99	112.09	42.89	40.61	109.44	60.56	90.25	116.97	22.27	31.61	70.97	97.4	36.98	49.9	2.44	5.57	0.64	0	0	0	0	0	0	0	0	0
100034684	Cstdc5	0	0	0	0	0	0	0	88.45	0	25.22	0	72.96	0	0	181.19	0	0	146.2	0	119.09	0	51.5	0	108.86	0	0	86.19	0	23.68	0	0	0	34.96	0	0	0	0	0	0	0	0	0	0	0	0
100038854	Cstdc6	0	0	0	0	0	0	0	0	0	0	0	0	0	0	0	0	0	0	0	0	0	0	0	47.78	0	0	0	0	0	0	0	0	0	0	0	0	0	0	0	0	0	0	0	0	0
109672	Cyb5a	4.68	3.99	6.9	10.85	7.19	6.96	14.34	26.12	20.93	18.53	15.99	19.23	17.42	15.05	36.77	33.78	28.07	65.52	58.94	62.52	66.92	69.21	83.11	84.01	202.32	250.93	178.24	243.73	237.34	335.22	357.53	401.06	328.88	546.26	369.59	531.24	503.25	390.07	328.7	259.14	338.04	256.59	239.67	268.71	217.11
217370	Cybc1	0	0	0.15	0.18	0.13	0	0.16	0.16	0.15	0	0.17	0	0	0	0.11	0.16	0	0	0	0	0	0.09	0.46	0	0.19	0.22	0.22	0.1	0	0.34	0.34	0.31	0.36	0.23	0.14	0.16	0.09	0.1	0.16	0	0.13	0	0	0.11	0.1
226143	Cyp2c23	0	0	0	0	0	0	0.12	0.63	0.33	0.19	0.18	0.08	0.1	0.08	0.88	0.31	0.12	0.66	0.93	0.41	0.56	0.81	0.7	2.95	1.29	6.33	5.14	5.58	5.01	8.76	1.08	8.52	8.12	4.87	2.63	3.54	1	2.83	3.79	15.35	6.55	7.44	8.81	11.22	12.62
74098	Czib	0.2	0.28	0.97	0.58	0.61	0.51	0.3	0.53	0.42	0	0.19	0.62	0.29	0.14	0.7	0.4	0.64	1.39	0	0.41	0	0	0.38	1.69	1.4	4.06	1.05	1.37	3.71	2.46	1.97	4.19	1.66	2.28	6.25	2.75	0	1.33	1.81	2.57	0.77	0	0.67	0.62	1.48
321006	Dcaf1	0.04	0.07	0.07	0.18	0.06	0.19	0.04	0.07	0.06	0.15	0.04	0.05	0.07	0.07	0.01	0.03	0.12	0.11	0.03	0.01	0	0.01	0.05	0	0.02	0.02	0.02	0.02	0.01	0	0	0	0.03	0	0.01	0	0	0.01	0	0	0	0	0	0.03	0
217830	Dglucy	0	0	0	0	0	0	0	0	0	0	0	0	0	0	0	0	0	0	0	0	0	0	0	0	0	0	0	0	0.02	0	0.07	0.05	0.16	0.26	0.21	0.44	1.02	1.73	1.56	1	2.47	1.93	3.27	4.09	2.41
13367	Diaph1	0.14	0.31	0.38	0.35	0.41	0.37	0.3	0.27	0.26	0.42	0.22	0.31	0.39	0.22	0.57	0.22	0.37	0.76	0.29	0.74	0.95	0.32	0.46	0.28	0.73	0.35	0.53	0.69	0.38	0.47	0.57	0.48	0.7	0.5	0.42	0.22	0.49	0.52	0.49	0.22	1.17	0.28	0.19	0.41	0.11
54004	Diaph2	0	0	0	0	0	0	0	0	0	0	0	0	0	0	0	0	0	0	0	0.22	0	0	0	0	0.91	0	0.42	0.37	0	0.03	1.81	1.12	0.78	1.68	0.91	0.04	0.01	0.02	2.68	0.1	2.46	0.18	0.03	1.26	0
56419	Diaph3	0	0.02	0.05	0.03	13.22	0.02	0.04	13.45	13.36	0	0.03	0	0.04	0.03	0	0.01	0	0	0	0	0	0	0	0	0	0	0	0	0	0	0	0	0	0	0	0	0	0	0	0	0	0	0	0	0
68861	Dipk2a	0	0	0	0	0.03	0.03	0.13	0	0.02	0.11	0.04	0.06	0.02	0	0.3	0	0.11	0	0.03	0	0.08	0.13	0.03	0	0.53	0.45	0.3	1.05	0.39	0.32	0.18	0.34	0.56	0.3	0.75	0.29	0.12	0	0.12	0	0	0	0.06	0.04	0
66349	Dmac2	0	0	0	0	0	0	0	0	0	0	0	0	0	0	0	0	0	0	0	0	0	0	0	0	0	0	0	0	0	0	0	0	0	0	0	0	0	0	0	0	0	0	0.05	0.11	0.06
68055	Dmac2l	0	0	0	0	0	0	0	0	0	0	0	0.06	0	0	0	0	0	0	0	0	0	0	1.16	0	0.48	1.16	0	0.27	0.6	0	0	0.6	0.69	0.68	1.26	0.33	0.11	0	0	0	0	0	0	0	0
433956	Dnaaf5	0.03	0.03	0.05	0.04	0.04	0.05	0.01	0.01	0	0.01	0	0.01	0.03	0	0	0.01	0	0.01	0.01	0.01	0	0	0.01	0	0	0	0.01	0.01	0	0	0	0	0.01	0	0	0	0	0.01	0	0	0	0	0.01	0	0
320615	Dop1a	0.03	0	0	0	0	0	0	0	0	0	0	0	0	0	0	0	0	0	0	0	0	0.02	0.03	0	0.01	0	0	0	0	0	0	0	0	0.24	0	0.01	0	0	0	0	0	0	0.09	0	0
70028	Dop1b	0	0	0	0	0	0	0.01	0.02	0.01	0.01	0.02	0.03	0.01	0	0.01	0.02	0.02	0.05	0.08	0.04	0.04	0.05	0	0.08	0.08	0.11	0.07	0	0	0	0	0	0	0.21	0.01	0.16	0.02	0.02	0.45	0.18	0	0	0.01	0.1	0.06
66369	Dus2	0.16	0	0	0	0.01	0	0.16	0	0	0.01	0	0	0.01	0	0	0	0	0	0	0	0	0	0	0.05	0	0	0.08	0	0	0.04	0.24	0	0.02	0	0	0	0	0	0	0	0	0	0	0	0
230249	Ecpas	0.41	0.78	0.49	0.31	0.35	0.35	0.37	0.31	0.38	0.27	0.57	0.31	0.36	0.55	0.22	0.12	0.4	0.34	0.2	0.16	0.2	0.12	0.46	0.22	0.3	0.34	0.32	0.31	0.22	0.46	0.24	0.42	0.48	0.49	0.25	0.25	0.32	0.32	0.28	0.33	0.16	0.14	0.22	0.46	0.2
214764	Edrf1	0	0	0	0	0	0.02	0	0	0	0	0	0	0	0	0	0	0	0	0	0	0	0	0	0	0	0	0	0	0	0	0	0	0	0	0	0	0	0	0	0	0	0	0	0	0
68043	Eef1akmt1	0.13	0.2	0.15	0.1	0	0.18	0	0	0	0	0.08	0.28	0.07	0	0.04	0	0	0.05	0.01	0	0	0	0	0	0	0	0	0	0	0	0	0	0	0	0	0	0	0	0	0	0	0	0	0	0
72096	Eef1akmt2	0.03	0	0.74	0	0.02	0.05	0	0.02	0.03	0	0	0.01	0	0	0	0	0	0.32	0	0	0	0	0	0.02	0	0	0	0	0	0	0	0	0	0	0	0	0	0	0	0	0	0	0	0	0
71449	Eef1aknmt	0.29	0.08	0.13	0.08	0.12	0.12	0.08	0.11	0.13	0.08	0.06	0.08	0.05	0.05	0.02	0.05	0.22	0.15	0.18	0.02	0.14	0	0.06	0.03	0.12	0.06	0.05	0.02	0.06	0.09	0.04	0.03	0.08	0.76	0.02	0.83	0.03	0.04	0.01	0	0	0.01	0.04	0.02	0.01
101592	Efl1	0.12	0.1	0.17	0.1	0.1	0.13	0.11	0.12	0.11	0.09	0.08	0.18	0.15	0.09	0.11	0.08	0.03	0.15	0.11	0.21	0.08	0.04	0.15	0.16	0.12	0.24	0.12	0.35	0.3	0.22	0.06	0.28	0.27	0.28	0.26	0.3	0.09	0.08	0.11	0.24	0.03	0.19	0.12	0.13	0.07
380752	Eipr1	0.27	0.1	0.23	0.11	0.06	0.18	0.18	0.13	0.15	0.15	0.12	1.18	0.1	0.11	0.08	0	0.09	0.14	0.12	0.19	0	0.05	0.22	0.19	0.07	0.21	0.21	0	0	0.32	0	0.25	0.26	0.17	0	0	0.13	0	0.07	0.05	0.04	0.13	0.06	0.15	0
27224	Eloa	0.06	0.08	0.08	0.13	0.06	0.03	0.18	0.03	0.01	0	0.16	0	0.03	0.09	0.02	0.02	0	0.04	0	0.03	0.03	0.02	0.24	0.05	0.02	0.09	0.09	0.03	0.11	0.16	0.07	0	0.09	0	0.13	0.07	0	0.18	0.07	0	0.02	0	0.08	0.03	0.04
67673	Elob	1.91	2.28	5.67	4.33	3.31	3.86	3.8	3.05	2.74	2.03	3.04	3.24	1.88	2.57	1.85	2.89	3.35	3	1.48	2.81	3.17	2.2	5.16	4.21	4.45	6	2.97	3.65	3.26	4.34	2.3	7.07	4.43	5.47	2.71	6.39	1.62	1.49	2.3	2.13	2.22	0.88	0.7	4.97	3.23
230233	Elp1	0.48	0.36	0.83	0.41	0.47	0.46	0.33	0.43	0.37	0.29	0.31	0.54	0.4	0.26	0.47	0.21	0.32	0.56	0.3	0.36	0.47	0.3	0.47	0.34	0.42	0.29	0.4	0.28	0.32	0.37	0.51	0.47	0.26	0.3	0.15	0.37	0.27	0.26	0.17	0.12	0.15	0.08	0.07	0.07	0.07
269587	Epb41	1.08	0.92	1.35	0.88	0.66	0.95	0.68	1.54	1.04	0.93	0.66	0.88	0.85	0.81	0.38	0.46	0.7	0.85	0.66	0.64	0.4	0.69	0.73	0.46	0.84	1.07	1.01	0.41	0.75	0.37	0.9	0.58	0.45	0.64	0.49	0.66	0.47	0.66	0.81	0.22	0.57	0.36	0.68	0.54	0.34
13821	Epb41l1	0.08	0.04	0	0.05	0.04	0.07	0.07	0.11	0.08	0.04	0.04	0.09	0.08	0.06	0.11	0.04	0.06	0.17	0.11	0.09	0.02	0.21	0.42	0.08	0.2	0.42	0.26	0.36	0.25	0.04	0.16	0.27	0.13	0	0.02	0	0	0	0	0	0	0	0	0	0
13822	Epb41l2	0.15	0.3	0.7	0.4	0.47	0.33	0.18	0.37	0.4	0.09	0.11	0.32	0.22	0.16	0.35	0.21	0.26	0.54	0.38	0.46	0.53	0.42	0.65	0.53	0.76	0.97	0.57	0.48	0.37	0.93	0.65	0.92	0.79	0.59	0.58	0.99	0.22	0.35	0.62	0.12	0.16	0.39	0.2	0.24	0.18
13823	Epb41l3	0.07	0.07	0.12	0.13	0.11	0.15	0.11	0.1	0.11	0.08	0.1	0.09	0.09	0.09	0.1	0.08	0.08	0.21	0.08	0.1	0.07	0.08	0.2	0.09	0.14	0.35	0.24	0.25	0.09	0.13	0.14	0.19	0.24	0	0	0	0.1	0	0	0	0	0	0	0.07	0
54357	Epb41l4b	0	0	0	0	0	0	0	0	0	0	0	0	0	0	0	0	0	0	0	0	0	0	0	0	0	0	0.05	0	0	0	0	0	0	0	0	0	0	0	0	0	0	0	0.04	0.07	0
226352	Epb41l5	0	0	0.05	0.01	0.01	0.01	0.02	0.02	0.03	0.02	0.03	0.04	0.03	0.03	0.04	0.05	0.06	0.17	0.07	0.05	0.09	0.03	0.06	0.03	0.09	0.13	0.07	0.05	0.1	0.06	0.09	0.1	0.09	0.05	0.12	0.08	0.13	0.18	0.19	0.31	0.05	0.06	0.21	0.23	0.25
13828	Epb42	0.98	0.96	1.3	0.62	0.84	0.75	1.23	1.52	0.72	1.08	0.75	1	0.96	0.79	0.44	1.15	1.02	0.47	0.38	0.7	0.39	0.6	0.24	0.3	0.06	0.33	0.26	0.34	0.12	0.05	0.08	0.07	0.11	0	0	0	0.09	0	0	0.02	0.03	0.05	0.07	0.03	0
59079	Erbin	0.04	0.01	0.04	0	0.05	0.17	0.02	0	0.01	0.03	0.02	0.02	0.04	0.02	0.05	0.01	0.04	0.12	0	0.01	0.01	0.02	0.04	0.03	0.07	0.03	0.16	0.16	0.01	0	0.01	0.01	0.14	0.07	0	0	0	0.01	0.03	0	0	0	0.04	0.12	0.01
58520	Erg28	0	0.29	0	0	0	0	0	1.06	0	0	0	0.69	0	0	0.52	0	0	0	0	0	0	1.58	0	1.23	0	0	2.97	8.76	2.34	5.21	0	0	8.28	0	2.35	1.41	2.06	1.61	1.05	0	0	2.52	0	0	0.99
239368	Erich5	0	0	0	0	0	0	0	0	0	0	0	0	0	0	0	0	0	0.01	0	0	0	0	0	0	0	0	0	0	0	0	0	0	0	0	0	0	0	0	0	0	0	0	0	0	0
27886	Ess2	0.03	0	0.06	0	0.01	0.3	0	0	0.01	0.02	0	0	0	0	0	0	0	0	0	0	0	0	0	0	0	0	0	0	0	0	0	0	0	0	0	0	0	0	0	0	0	0	0	0	0
67636	Etfrf1	0	0	0	0	0	0	0	0	0	0	0	0	0	0	0.08	0	0	0	0	0	0	0	0	0.25	0	0	0.47	0.52	0	0.39	0	0	0	0.96	0.52	0.73	0	1.22	1.42	0.87	0	0.18	0.97	1.53	0.65
106581	Fam234a	0	0	0	0	0	0.01	0.01	0	0.02	0	0	0	0	0	0	0	0.01	0.05	0	0.02	0	0.07	0.06	0.15	0.18	0.1	0.41	0.09	0.21	0.19	0.21	0.24	0.32	0.61	0.91	0.78	0.36	0.41	0.18	0.34	0.39	0.2	0.77	0.95	0.76
74525	Fam234b	0.01	0	0	0.01	0	0	0.12	0	0	0	0	0.01	0	0	0	0	0	0	0	0	0	0	0	0	0	0	0	0	0	0	0	0	0	0	0	0	0	0	0	0	0	0	0	0	0
70617	Fam241a	0	0.06	0.12	0.19	0	0.07	0.29	0.08	0	0.05	0.1	0.17	0	0.17	0	0.17	0	0	0	0.15	0	0	0	0	0	0	0	0	0	0	0	0	0	0	0	0	0	0	0	0	0	0	0	0	0
97863	Fam8a1	0	0	0	0	0	0	0	0	0	0	0	0	0	0	0	0	0	0	0	0	0	0	0	0	0	0	0	0	0	0	0	0	0	0	0	0	0	0	0	0	0	0	0	3.52	0.01
210998	Fam91a1	0.31	0	0.02	0.01	0.08	0.04	0.02	0.05	0.03	0.02	0.05	0.06	0.3	0.05	0.04	0.01	0.03	0.1	0.01	0.01	0	0	0.33	0.08	0.1	0.03	0.02	0.13	0.02	0.05	0.18	0.13	0.03	0.13	0.1	0.01	0.32	0	0.08	0.04	0.03	0	0.05	0.35	0.03
234730	Fcsk	0.04	0.01	0.03	0.01	0.01	0	0.01	0.01	0.02	0	0.04	0.02	0.03	0.02	0	0.02	0.03	0.01	0.06	0.07	0	0.04	0.08	0.03	0.13	0.07	0.04	0.06	0	0.06	0.19	0.09	0.04	0.09	0.28	0.08	0.09	0.04	0.05	0.07	0.04	0.02	0.05	0.08	0.19
68165	Fdx2	0.14	0	0	0	0	0	0.02	0	0.02	0	0	0	0	0	0	0	0	0	0	0	0	0	0	0	0	0.08	0	0	0	0	0	0.46	0.09	0.39	0	0.08	0	0	0	0	0	0.38	0	0	0
66117	Fmc1	0	0	0	0.12	0	0	0	0	0	0	0	0	0.12	0	0	0	0	0	0	0	0	0	0	0	0	0	0	0	0	0	0	0	0	0	0	0	0	0	0	0	0	0	0	0	0
381126	Garem1	0	0	0	0	0	0	0	0	0	0	0	0	0	0	0	0	0	0	0	0	0	0	0	0	0	0	0	0	0	0	0	0	0	0	0	0	0	0	0	0	0	0	0	0.04	0
229487	Gatb	0	0	0.02	0	0	0.07	0	0	0	0	0	0	0	0	0	0	0	0	0	0	0	0	0	0	0	0	0.06	0	0	0.01	0	0	0	0	0	0.01	0	0	0	0	0	0	0	0	0
213350	Gatd1	0	0	0.52	0.49	0.33	0.6	0.47	0.63	1.07	0.32	0.35	0.66	0	0.5	0.41	0.32	0.32	1.25	0	0.51	0.6	0.38	0.41	0.31	0.7	0	0.45	0.87	0.46	0.71	0.84	0.66	1.12	1.12	0	0.54	0	0.67	0.54	0.51	0.54	0	0	0.32	0.32
229898	Gbp2b	0	0	0	0	0	0	0	0	0	0	0	0	0	0	0	0	0	0	0	0	0	0	0	0	0	0	0	0	0	0.13	0	0	0	0	0	0	0	0	0	0	0	0	0	0	0
231659	Gcn1	0.81	1.38	5.83	0.82	3.29	3.41	0.87	3.58	0.66	0.56	0.44	3.72	0.61	0.96	0.46	0.57	0.53	4.72	0.63	3.11	5.3	2.33	0.66	4.01	0.71	0.86	4.43	1.25	3.93	8.04	0.89	0.63	7.73	6.95	0.99	0.94	2.12	5.77	2.06	0.52	0.98	5.63	0.55	0.99	0.94
433653	Gimd1	0	0	0	0	0	0	0	0	0	0	0	0	0	0	0	0	0	0	0	0	0	0	0	0	0	0	0	0	0	0.04	0	0	0	0	0	0	0.1	0	0	0	0	0	0	0	0
14933	Gk	0	0	0	0.04	0.03	0.05	0.03	0.26	0.19	0.12	0.09	0.31	0.04	0.04	0.69	0.55	0.42	1.79	1.39	2.13	1.94	1.99	3.08	4.57	8.47	8.79	6.76	9.8	10.22	10.91	18.07	14.12	15.6	14.91	16.52	16.34	11.58	11.39	10.48	4.85	4.92	5.07	3.99	4.64	3.47
226162	Gm17018	0.08	0.07	0.21	0.07	0.06	0.16	0	0	0.02	0	0.05	0.27	0.05	0	0	0	0	0	0	0	0	0	0	0.03	0	0	0	0	0.03	0	0	0	0	0	0	0	0	0	0	0	0	0	0	0	0
667118	Zbed6	0	0	0	0	0	0	0	0	0	0	0	0	0	0	0	0	0	0	0	0	0	0	0	0	0	0	0.06	0	0	0	0	0	0	0	0	0	0	0	0	0	0	0	0	0	0
16621	Gm45753	0	0	0	0	0	0	0	0	0	0	0	0.03	0	0	0.01	0.02	0.12	0.15	0.1	0.09	0.1	0.04	0	0.02	0.03	0	0	0	0.01	0	0.13	0	0	0.2	0	0.15	0.18	0	0.02	0.22	0.32	0.2	0.12	0.08	0
207728	Gm45837	0.01	0.01	0	0	0	0	0.01	0.03	0	0.03	0.01	0.02	0.02	0.1	0.05	0.04	0.04	0.11	0.08	0.05	0.06	0.04	0.21	0.07	0.12	0.09	0.06	0.12	0.09	0.07	0.03	2.35	0.13	0.06	0.09	0.07	0.05	0.03	0	0	0	0	0.01	0.03	0
100113398	Gm49322	0	0.02	0.03	0	0.02	0	0	0	0	0	0	0	0	0	0	0	0	0	0	0	0	0.13	0	0	0	0	0	0	0	0	0	0	0	0	0	0	0	0	0	0	0	0	0	0	0
18950	Gm49342	4.67	5.27	5.75	5.57	4.44	4.11	7.54	7.82	5.58	4.06	3.25	7.6	3.54	7.27	5.86	3.65	6.68	13.15	9.43	12.6	12	9.97	13.42	10.24	16.73	20.49	12.33	18.82	14.49	15.69	28.38	22.85	18.2	28.19	35	31.58	23.06	38.23	36.34	11.86	21.65	18.03	15.05	13.54	13.37
66387	Gm49405	0	0	0	0	0	0	0	0.07	0	0	0	0	0	0	0.01	0	0	0.03	0	0	0.2	0	0	0.32	0.17	0	0.39	0	0.44	1.25	0	0	0.49	0.58	0.24	0.43	0.7	0.87	0.5	0.92	3.79	1.39	0.45	0.53	0.55
231510	Gpat3	0	0	0	0	0	0	0	0.14	0	0	0	0	0	0	0	0	0	0	0.01	0	0	0	0	0.06	0.76	0.26	0.15	0.22	0.24	0.12	0.22	0.46	0.35	0.09	0.49	0.11	0	0	0	0	0	0	0	0	0
102247	Gpat4	0	0	0	0.01	0.01	0.03	0	0.13	0	0	0.01	0.02	0	0	0.02	0	0	0	0	0.02	0.03	0	0	0.02	0	0	0.28	0.06	0.03	0.04	0	0.05	0.04	0.02	0.07	0.06	0.07	0.04	0.12	0.04	0.05	0.06	0.08	0.05	0.09
110355	Grk2	0.01	0	0.05	0	0.04	0.03	0	0.05	0.07	0.03	0.03	0.05	0.04	0.05	3.71	0	0	0.14	0	0.03	0.18	0.03	0.17	0.04	0	0.39	0.06	0.15	0.07	0.15	0.04	0.37	0.07	0	0.01	0	0	0	0	0	0	0	0	0	0
320129	Grk3	0	0	0.02	0	0	0	0	0	0	0	0	0	0	0	0	0	0	0	0	0	0	0	0	0.01	0	0	0.01	0	0	0	0	0	0	0	0	0	0	0	0	0	0	0	0	0	0
225884	Gstp3	0	0	0	0	5.33	0	2.4	11.15	14.34	2.24	3.43	6.6	2.06	3.35	6.32	6.15	4.5	14.03	13.22	10.54	2.62	7.56	5.48	5	13.42	14.18	16.58	17.13	26.13	15.7	20.6	11.53	25.98	18.57	31.34	22.28	25.49	22.88	19.6	120.51	4.94	29.26	0	238.15	0
60596	Gucy1a1	0.03	0.02	0.15	0.04	0.01	0	0.04	0.03	0.02	0	0.01	0.01	0.03	0.01	0.02	0.01	0.05	0.22	0	0.03	0.05	0.08	0.07	0.06	0.17	0.42	0.12	0.18	0.14	0.51	0.27	0.15	0.39	0.8	0.14	0.33	0.03	0.19	0.07	0	0	0.03	0.03	0.01	0
54195	Gucy1b1	0.1	0.15	0.02	0.01	0.03	0.14	0.01	0.02	0.04	0	0.09	0.02	0	0.04	0.06	0	0.28	0.04	0.1	0.11	0.08	0.1	0.6	0.14	0.23	0.18	0.27	0.19	0.44	0.59	0.3	0.15	0.66	0.18	0.19	0.15	0.25	0.08	0.23	0.02	0.06	0.01	0.04	0.02	0.01
70757	Hacd2	0	0	0	0	1.13	0	0	2.08	1.94	0	0	0	0	0	1.26	0	1.03	3.67	0	3.31	2.19	0	0	2.47	0	0	2.5	0	6.37	5.74	1.23	0	4.44	4.34	8.62	5.13	2.3	3.1	3.16	0	0	0.54	1.99	2.83	2.61
57874	Hacd3	0	0.31	0.44	0.36	0.44	0.1	0.65	0.98	0.73	0.31	0.64	0.39	0.36	0.41	1.27	0.75	0.65	2.35	0.99	3.98	1.5	1.56	3.05	2.29	6.23	4.82	3.01	6.86	6.78	8.27	8.17	8.02	9.37	9.1	5.93	11.89	5.03	6.41	6.34	5.98	3.89	2.3	4.86	4.89	3.67
15193	Hdgfl2	1.3	1.12	1.6	0.56	0.65	0.56	0.43	0.33	0.24	0.31	0.17	0.65	0.52	0.3	0.32	0.12	0.4	0.28	0.37	0.49	0.5	0.46	0.15	0.13	0.6	0.37	0.21	0.69	0.34	0.23	0.55	0.13	0.33	0.22	0.29	0.24	0.35	0.32	0.39	0.17	0.32	0.22	0.2	0.22	0.09
29877	Hdgfl3	0	0	0	0	0	0	0	0	0	0	0	0	0	0	0	0	0	0	0	0	0	0	0	0	0	0	0	0	0	0	0	0	0	0.61	0	0	0	0	0	0	1.07	0	0.65	0.69	0
214932	Hdhd5	0	0	0.02	0	0.02	0.02	0.01	0.06	0.04	0	0	0.18	0	0	0.13	0	0	0.28	0.03	0.15	0.11	0.03	0	0.04	0.07	0.11	0.25	0.19	0.13	0.27	0.29	0.61	5.59	0.49	0.59	3.06	0.66	0.6	0.57	0.33	0.52	0.5	0.3	11.49	0.29
269700	Hectd4	0.02	0.03	0.02	0.03	0.03	0.02	0.05	0.02	0.03	0.05	0.03	0.03	0.03	0.11	0.01	0.02	0.06	0.01	0.01	0.01	0	0	0	0	0	0	0.01	0	0	0	0	0	0.01	0	0	0	0	0	0	0	0	0	0	0	0
59053	Hgh1	0.51	0.37	0.27	0.28	0.32	0.29	0.2	0.19	0.12	0.13	0.19	0.24	0.32	0.07	0.06	0.11	0.07	0.13	0	0.05	0.1	0.04	0.07	0.02	0.21	0	0.11	0	0.04	0.03	0	0.03	0.03	0	0	0	0.03	0	0	0	0	0	0.03	0.04	0.02
67669	Hikeshi	0.18	0	0.31	0.21	0.17	0.15	0.2	0.14	0.17	0.19	0.1	0.15	0.12	0.24	0.16	0.18	0.25	0.25	0	0	0	0	0	0.11	0	0	0.06	0.39	0	0.42	0	0	0.35	0	0	0	0.3	0.5	0.52	0	0.07	0.22	0.25	0.29	0.15
72612	Hpf1	0.76	0.72	0.65	1.17	0.54	0.5	0.81	0.26	0.41	0.63	0.45	0.33	0.46	0.4	0.05	0.35	0.28	0.18	0.14	0.13	0.2	0.09	0.1	0	0.08	0.08	0.07	0.07	0	0	0	0.16	0.02	0	0	0	0	0	0	0	0	0	0	0	0
218333	Ice1	0.01	0	0	0	0	0	0	0	0	0	0	0	0	0	0	0	0	0	0	0	0	0	0	0	0	0	0	0	0	0	0	0	0	0	0	0	0	0	0	0	0	0	0	0	0
93697	Ice2	0	0	0.01	0	0	0.01	0	0	0	0	0	0	0	0	0	0	0	0	0	0	0	0	0	0	0	0	0	0	0	0	0	0	0	0	0	0	0	0	0	0	0	0	0	0	0
226691	Ifi207	0	0	0	0	0	0	0	0	0	0	0	0	0	0	0	0	0	0	0	0	0	0	0	0.01	0	0.04	0.01	0	0	0	0	0.05	0.02	0	0	0	0	0.01	0.01	0	0	0	0	0	0
236312	Ifi209	0	0	0	0	0	0	0	0	0	0.01	0	0	0	0	0	0.01	0.05	0.04	0.09	0.17	0	0.06	0.22	0.04	0.1	0.07	0.8	0.16	0.03	0.03	0.11	0	0.71	0	0.04	0.03	0	0	0	0	0	0	0	0	0
381308	Ifi211	0	0	0	0	0	0	0	0.06	0	0	0	0	0	0	0	0	0	0.1	0	0	0	0.06	0	0.07	0	0	0.03	0.11	0.16	0	0	0	0.06	0	0.08	0	0	0	0.16	0	0	0	0	0	0
67286	Ift22	0	0	0	0	0	0.01	0	0	0	0	0	0	0	0	0	0	0	0	0	0	0	0	0	0	0	0	0	0	0	0	0	0	0	0	0	0	0	0	0	0	0	0	0	0	0
224647	Ilrun	0	0	0.01	0	0	0	0	0	0	0	0	0	0	0	0	0	0	0	0	0	0	0	0	0	0	0	0	0	0	0	0	0	0	0	0	0	0	0	0	0	0	0	0	0	0
71957	Ints11	0.06	0.05	0.09	0.12	0.07	0.05	0.09	0.04	0	0	0.05	0.08	0.1	0	0	0.06	0.03	0	0	0.03	0	0.06	0.15	0.11	0.03	0.28	0.07	0.08	0	0	0.05	0	0.04	0.03	0.02	0	0	0	0	0	0	0	0	0.08	0
71177	Ints13	0.15	0.01	0.2	0.06	0.12	0.22	0.17	0.03	0.07	0.03	0.05	0.09	0.09	0.03	0.04	0.06	0.08	0.05	0.05	0.01	0.06	0.01	0.05	0.03	0.06	0.08	0.03	0.02	0.03	0.03	0.12	0.02	0.04	0	0.01	0	0.01	0	0	0	0	0	0	0.03	0.01
69882	Ints14	0.05	0.04	0.07	0.19	0.32	0.05	0.12	0.04	0.04	0.02	0.01	0.05	0.21	0.22	0.03	0.01	0.01	0.04	0	0	0.03	0	0	0.04	0	0	0.05	0	0	0	0	0	0	0	0	0	0	0	0	0	0	0	0	0.04	0
236790	Ints6l	0.02	0.01	0	0	0.01	0.01	0.01	0	0	0	0	0.01	0	0	0	0	0	0	0	0	0	0	0	0	0	0	0	0	0	0	0	0	0	0	0	0	0	0	0	0	0	0	0	0	0
70599	Itprid2	0	0	0	0	0	0	0	0	0	0	0	0	0	0	0	0	0	0	0	0	0	0	0	0	0	0.01	0	0	0	0	0.02	0.03	0	0.03	0.01	0.08	0.04	0.03	0	0	0.04	0.05	0.11	0.01	0
382207	Jade3	0	0	0.01	0.02	0	0	0	0	0	0	0	0	0	0	0	0	0	0	0	0	0	0	0	0	0	0	0	0	0	0	0	0	0	0	0	0	0	0	0	0	0	0	0	0	0
240185	Jcad	0	0	0	0	0	0	0	0	0	0	0	0	0	0	0	0	0	0	0	0	0	0	0.05	0.02	0	0	0.16	0	0	1.39	0	0	0.05	0	0	0	0	0	0	0	0	0	0	0	0
16069	Jchain	0	0	0	0	0	0	0	0	0	0	0	0	0	0	0	0	0	0	0	0	0	0	0	0	0	0	0	0	0	0	0	0	0	0	0	0	0	0	0	0	0	0	0.17	0.17	0
15374	Jpt1	1.89	1.48	2.04	1.37	2.06	1.24	0.81	1.37	1.54	0.54	0.55	2.16	0.44	1.41	0.9	0	0.68	1.01	0.14	0	1.25	0.26	0	0.26	0.51	0.38	0.19	0	0.22	0.42	0	0	0.34	0	0	0.15	0	0	0	0	0	0	0	0	0
52009	Jpt2	2.3	1.34	3.42	0.72	1.04	1.11	1.1	1.06	1.45	1.84	0.38	1.69	0.54	0.35	1.12	0.65	0.43	1.52	2.03	0.32	1.45	0.05	0	0.17	7.03	0.81	3.86	4.6	0	0.84	0.27	7.17	5.43	0.28	0	5.79	6.6	8.27	7.24	0.19	0	0.09	0.34	5.89	0.22
239217	Kctd12	0.56	0.26	0.6	0.31	0.37	0.39	0.34	0.82	0.71	1.06	0.53	0.88	0.82	0.35	1.25	1.57	0.94	1.1	1.18	1.17	0.92	1.14	1.12	0.94	3.76	2.44	1.65	2.21	2.64	2.57	2.53	4.48	2.88	1.7	1.41	1.39	1.32	0.72	0.8	0.88	0.23	0.16	0.08	0.31	0.21
74200	Khdc4	0.02	0	0	0	0.02	0.02	0	0	0	0	0	0	0	0	0	0	0	0	0	0	0	0	0	0	0	0	0	0	0	0	0	0	0	0	0	0	0	0	0	0	0	0	0	0	0
72320	Kif1bp	0	0.02	0.04	0.02	0.01	0.34	0.12	0.23	0.01	0.16	0	0.01	0.02	0	0	0	0	0.38	0	0	0	0	0.01	0	0	0	0	0	0	0	0	0	0	0	0	0	0	0	0	0	0	0	0	0	0
67956	Kmt5a	0	0	0	0.01	0	0	0	0	0	0	0	0	0	0	0	0	0	0	0	0	0	0	0	0	0	0	0	0	0	0	0	0	0	0	0	0	0	0	0	0	0	0	0	0	0
232811	Kmt5c	0.05	0.03	0	0	0.02	0.02	0.05	0	0	0.02	0	0.01	0.02	0.03	0	0.02	0	0	0	0	0	0	0	0	0	0	0	0	0	0	0	0	0	0	0	0	0	0	0	0	0	0	0	0	0
76464	Knl1	0	0	0.02	0	0.03	0.03	0.01	0.01	0.01	0	0	0.01	0.01	0	0	0	0	0	0	0	0	0	0	0	0	0	0	0	0	0	0	0	0	0	0	0	0	0	0	0	0	0	0	0	0
239673	Krt90	0	0	0	0	0	0	0	0	0	0	0	0	0	0	0	0	0	0.64	0	0	0	0	0	0	0	0	1.46	3.71	0	0	2.77	0	1.97	0	0	0	0	0	0	0	0	0	0	0	0
70266	Kyat1	0	0	0.06	0.01	0.15	0.04	0.08	0.25	0.17	0.12	0.06	0.13	0.1	0.09	0.09	0.18	0.18	0.33	0.54	0.96	0.48	0.66	0.83	0.88	2.23	1.9	1.95	1.38	1.02	1.64	2.7	1.46	1.52	1.34	1.19	2.08	2.62	3.98	4.38	10.1	5.19	4.79	5.17	5.62	5.59
229905	Kyat3	0.1	0.26	0.05	0.11	0.05	0.16	0.1	0.32	0.14	0.18	0.08	0.26	0.13	0.56	0.59	0.28	0.35	1.42	7.09	1.91	1.49	3.93	7.74	12.25	20.55	23.51	24.9	40.29	41.44	61.79	65.48	71.46	70.09	109.04	92.38	80.44	32.01	47.44	48.24	23.36	33.7	29.42	12.69	13	15.82
68832	Ldah	0.15	0.14	0.12	0.07	0.06	0.09	0.08	0	0.07	0.18	0.08	0.06	0.08	0.07	0.07	0.11	0.1	0	0.12	0.11	0.07	0.08	0.13	0.12	0.25	0.32	0	0.63	0.35	0.3	0.63	0.26	0.59	0.51	0.56	0.64	0.33	1.92	0.53	0.53	0.33	0.32	0.45	0.8	0.37
69605	Lnpk	0.14	0.12	0.24	0.18	0.05	0.16	0.15	0.17	0.07	0	0.08	0.07	0	0.13	0.04	0.04	0	0.07	0.11	0.11	0.05	0.03	0.14	0.06	0	0.11	0.34	0.1	0.16	0.14	0.14	0.2	0.15	0.16	0.06	0.08	0.13	0	0.1	0	0.35	0.06	0.16	0.11	0.15
399603	Lratd2	0	0	0	0	0	0	0	0	0	0	0	0	0	0	0	0	0	0	0.02	0	0	0	0	0	0	0	0	0.17	0	0	0.04	0	0	1.96	0.13	0	0.04	0.13	0.02	0	0	0.07	0	0	0
76522	Lsm8	0.41	1.9	5.34	1.49	1.91	3.22	1.54	2.18	42.53	0.6	1.46	31.05	1.08	1.56	2.06	0	0.58	1.7	1.68	1.66	0.95	1.24	2.83	2.89	0	2.19	1.67	3.11	0	1.34	2.28	1.57	1.7	1.86	0	1.32	0	1.37	1.44	0	0	1.55	0.54	0.96	0.58
68115	Maip1	0	0	0.15	0.22	0.09	0.07	0	0.09	0.05	0	0	0.16	0	0	0.12	0.1	0.17	0.17	0	0.52	0	0.1	0	0.16	0.13	0.36	0.39	0	0.28	0.42	0.24	0.53	0.63	0	0.32	1.03	0.32	0.74	0.49	0.51	0	0.11	0.63	0.64	0.68
192173	Mcrip1	0.15	0	0.85	0.17	0	0.16	0	0	0.07	0.25	0	0.21	0	0	0.06	0	0	0.26	0	0	0.13	0	0	0.07	0	0.34	0	0	0	0.01	0	0.16	0.31	0	0	0.26	0	0	0	0	0	0	0	0	0
68241	Mcrip2	0	0	0	0	0	0	0	0	0	0	0	0	0	0	0.11	0	0	0	0	0.24	0	0	0	0	0	0	0	0	0	0	0	0	0	0	0	0	0	0.15	0	0	0	0	0.38	0	0.05
74347	Meak7	0	0	0	0	0	0	0.01	0	0	0	0.01	0.01	0.01	0	0	0	0.01	0	0	0	0.02	0	0.01	0.01	0	0	0	0	0	0.04	0.05	0	0.05	0	0	0	0	0.15	0.07	0	0.04	0.05	0.03	0	0.07
67943	Mesd	2.07	1.27	2.15	1.26	0.89	1.08	1.24	1.51	0.8	1.37	0.9	1.52	1.34	0.26	2.01	1.37	1.75	1.5	3.66	2.7	1.67	1.56	2.03	0.85	2.14	2.24	0.99	3.04	0.74	1.84	4.85	1.62	2.6	3.25	3.85	2.08	2.7	2.12	0.94	1.96	0	1.07	0.67	0.5	0.66
68347	Mettl26	0.48	0.47	0.93	0.83	0.76	1.2	1.12	1.16	1.91	1.22	1.36	1.48	1.11	1.04	2.15	0.61	1.86	4.14	2.32	3.34	2.42	2.39	5.59	3.3	7.08	9.47	6	14.63	9.01	17.26	29.35	25.04	22.35	36.34	18.46	27.27	31.34	22.72	24.7	20.53	20.79	18.19	46.23	32.03	22.56
79565	Mettl27	0	0	0	0	0.02	0	0.01	0.07	0.04	0	0.02	0.02	0	0	0	0.08	0.09	0.04	0.08	0.13	0	0.05	0.15	0.11	0.19	0	0.27	0	0.18	0	0.27	0	0.46	0.1	0.17	0	0	0.24	0.33	0.18	0	0.44	0.24	0.23	0.1
217615	Mia2	0.04	0.05	0.08	0.09	0.22	0	0.11	0.16	0.11	0.05	0.09	0.1	0.06	0.09	0.77	0.15	0.18	0.22	0.27	0.22	0.14	0.29	0.33	0.26	0.34	0.53	0.5	0.43	0.5	0.76	0.23	1.44	0.88	1.54	0.44	0.39	0.28	1.31	0.88	2.08	0.48	0.78	0.81	0.79	1.79
433771	Micos10	0	0	0.52	0	0	0	0	0	0	0	0	0	0	0	0	0	0	0	0	0	0	0	0	0	0	0	0	0	0	0	0	0	0	0	0	0	0	0	0	0	0	0	0	0	0
224904	Micos13	0.11	0.86	1.37	0	0.64	0.85	0.89	1.8	0.81	0.85	0.88	0.93	0	0.72	0.26	0	0	1.36	1.31	0.17	0	1.09	0.3	0.79	2.46	2.65	1.46	2.31	0	1.55	3.99	0.8	2.24	4.16	3.71	0	3.21	2.85	1.39	3.56	2.1	0	3.41	1.95	1.32
108958	Miga2	0	0	0	0	0	0	0	0	0	0	0	0	0	0	0	0	0	0	0	0	0	0	0	0	0	0	0	0	0	0	0.51	0	0	0	0	0.05	0	0.02	0.03	0	0	0.26	0.02	0.08	0.04
75007	Mindy1	0	0	0	0.02	0	0	0	0	0	0	0	0	0	0	0	0	0	0	0.09	0	0.04	0.1	0	0.02	0.19	0.14	0.21	1.59	0	0.46	0	0.22	0.05	0.32	0.14	0.18	0.23	0.22	0.31	0.24	0.31	0.23	0.2	2.38	0.24
235461	Mindy2	0	0	0	0	0.07	0	0	0.1	0.01	0	0.01	0	0	0	0	0	0	0	0	0	0	0	0	0	0	0	0	0	0	0	0	0	0	0	0	0	0	0	0	0	0	0	0	0	0
66960	Mindy3	0	0	0	0	0.03	0.05	0	0.02	0	0	0.02	0	0	0	0.01	0	0	0	0	0	0	0	0	0	0	0	0.06	0	0	0	0	0	0	0	0	0	0	0	0.02	0.73	0	0	0.06	0.07	0
17850	Mmut	0.24	0.19	0.28	0.79	0.22	0.77	0.44	0.35	0.5	0.54	0.52	0.64	0.2	0.38	0.43	0.61	0.54	0.79	0.57	1.45	0.57	1.02	1.95	1.73	5.65	5.36	3.66	5.79	2.96	4.55	8.95	7.12	6.87	6.65	5.45	5.66	9.76	6.94	5.92	9.27	8.53	4.6	6.7	6.84	5.68
67390	Mrm3	0	0.07	0	0.03	0	0.08	0	0	0	0	0.02	0	0.03	0	0	0	0.01	0	0.08	0	0	0	0	0	0	0	0	0	0	0	0	0	0	0	0	0	0	0	0	0	0	0	0	0	0
67840	Mrpl57	0	0	0	0	0	0	0	0	0	0	0	0.2	0	0	0	0	0	0	0	0	0	0	0	0	0	0	0	0	0	0	0	0	0	0	0	0	0	0	0	0	0	0.62	0	0	0
68572	Mrpl58	0.61	0.59	0.85	0.81	0.39	0.84	0.45	0	0	0.58	0	0.47	0.27	1.07	0	0	0.48	0	0	0.15	0	0.37	1.05	0.61	0.74	0	1.44	0.52	0.67	1.92	4.47	2.12	1.38	1.07	3.01	2.14	0.73	0.46	1.55	0	0.52	1.08	0.39	0.54	0.47
239719	Mrtfb	0	0	0.11	0	0	0	0	0	0.04	0	0	0	0	0	0	0	0.01	0	0	0	0	0	0	0.08	0	0	0.03	0	0	0	0	0	0	0	0.02	0	0	0	0	0	0	0	0	0.23	0
66234	Msmo1	0.24	0.3	0	0.47	0	0	0.22	1.03	0.29	0	0.45	0.43	0.67	1.03	0.73	0.42	0.53	1.39	0.77	1.68	0.53	0.63	0.57	0	0.51	0.47	0.82	0	0.11	0	0.36	0	0	0	0	0	0.94	0	2.35	0.53	0.8	1.02	0.63	0.67	0.54
100039707	Mthfsl	0	0	0	0	0	0	0	0.16	0.09	0.51	0.05	0.07	0.08	0	0.07	0.09	0.13	0.24	0.28	0	0	0	0	0.62	0	0	0.69	0.6	0.95	1.66	1.48	0	1.44	0	0	2.09	1.11	1.24	0.94	1.24	0	0.82	0.82	0.47	0.51
72198	Mtrex	0.84	0.92	1.08	0.86	0.77	0.75	0.69	0.49	0.44	0.47	0.48	0.86	0.66	0.55	0.33	0.45	0.78	0.85	0.32	0.5	0.23	0.39	0.64	0.51	0.59	0.45	0.66	0.35	0.46	0.16	0.54	0.79	0.7	0.91	0.13	0.43	0.08	0.2	0.12	0.07	0.16	0.06	0.14	0.02	0.09
28106	Mydgf	0.61	1.1	0.95	0.63	0.71	0.92	1.02	1.6	1.06	0.75	0.96	1.92	0.65	0.77	1.36	1.91	1.09	2.45	2.26	3.26	1.94	1.79	3.55	1.51	2.74	2.5	2.8	4.46	2.15	4.95	2.96	2.75	2.39	2.18	2.41	3.81	2.27	0	2.02	4.24	1.66	0.96	2	1.36	0
329828	Myorg	0	0	0	0	0	0	0	0	0	0	0	0	0	0	0	0	0	0	0	0	0	0	0	0	0	0	0	0	0	0	0.02	0	0	0	0	0.03	0	0.02	0.05	0	0	0	0.28	0	0.02
78304	Naa38	0.18	0	0.14	0	0.16	0.08	0	0.16	0.2	0	0.22	0.24	0	0	0.13	0	0	0.07	0	0	0.06	0	0	0	0	0.2	0	0	0	0	0	0	0	0	0	0.59	0	0.54	0	0	0	0	0	0.49	0
56441	Naa80	0	0	0	0	0	0	0	0	0	0	0	0.08	0	0	0	0	0	0	0	0	0	0	0	0	0	0	0	0	0	0	0	0	0	0	0	0	0	0	0	0	0	0	0	0	0
223646	Naprt	0.05	0.03	0.06	0.18	0.24	0.53	0.4	0.27	0.25	0.16	0.26	0.36	0.18	0.26	0.79	0.39	0.24	0.81	0.77	1.09	1.33	0.75	1.34	0.64	1.65	2.58	2.84	1.04	2.89	1.68	1.91	2.9	2.58	3.85	10.37	4.28	3.4	7.92	3.79	2.87	4.11	3.94	2.56	3.08	5.45
66116	Nat8f1	0	0	0	0	0	0	0	0	0	0	0	0	0	0	0	0	0	0	0.59	0.53	0	0.03	0	0	0.88	0.25	0.26	0.41	0.87	0.74	0.69	0	0	0.62	1.05	0.24	5.15	5.96	5.19	3.53	3.17	7.26	5.32	8.49	7.47
93673	Nat8f2	0	0	0	0	0	0	0	0	0	0	0	0	0	0	0	0	0	0	0	0	0	0	0	0	0.1	0	0.01	0	0.04	0	0.47	0	0.2	0.62	0.74	2.86	5.11	6.08	4.21	11.08	6.28	6.63	6.25	9.3	11.57
69049	Nat8f5	0	0	0	0	0	0	0	0	0	0	0	0	0	0	0	0	0	0	0	0	0	0	0	0	0	0	0	0	0	0	0	0	0	0	0	0	0	0	0	0	0	0	0.76	0.79	0.43
24083	Natd1	0.26	0.25	0.32	0.06	0	0.09	0.22	0	0.07	0	0.14	0.42	0	0.43	0	0	0.08	0.06	0	0	0	0	0	0.05	0	0	0	0	0.12	0	0	0	0	0	0	0	0	0	0	0	0	0	0	0	0
69225	Naxd	0.1	0.14	0.09	0.06	0.14	0.17	0.17	0.55	0.21	0.17	0.12	0.39	0.23	0.11	0.32	0.15	0.18	0.44	0.26	0.45	0.61	0.31	0.79	0.71	0.85	1.21	1	2.01	1.01	1.62	2.48	2.6	1.51	2.39	2.48	2.2	1.62	2.47	2.77	2.75	2.65	1.57	1.83	1.85	1.83
246703	Naxe	0.15	0.18	0.74	0.37	0.4	0.33	0.12	0.46	0.68	0.34	0.5	1.24	0.4	0.5	1.67	1	1.32	2.08	2.34	1.28	1.56	1.19	1.41	2.2	2.11	3.74	3.55	1.63	3.69	2.72	2.76	2.86	4.82	7.69	6.37	5.2	2.49	7.27	4.02	3.82	2.84	5.64	4.53	3.75	3.08
66874	Ncbp3	0.29	0.32	0.15	0.2	0	0.52	0.13	0.09	0.2	0.49	0.12	0.07	0.24	0	0	0	0.11	0	0	0	0	0.41	0.21	0.11	0	0.22	0.12	0	0.06	0	0	0	0	0	0	0	0	0	0	0	0	0	0	0	0
58235	Nectin1	0	0	0	0	0	0	0	0	0	0	0	0	0	0	0	0	0	0	0	0.44	0	0	0	0	0	0	0	0	0	0	0	0	0	0	0	0	0	0	0	0	0	0	0	0	0.03
19294	Nectin2	0	0	0.16	0.1	0	0.21	0	0	0	0	0.02	0	0	0	0	0	0	0.01	0.05	0	0	0	0.14	0	0.22	0.35	0.18	0.07	0	0	0	0	0.03	0	0	0	0.04	0	0	0.14	0	0	0	0	0
210035	Nemp1	0	0	0	0.05	0.19	0	0	0	0	0	0	0	0	0	0	0	0	0	0	0	0	0	0	0	0	0	0	0	0	0	0	0	0	0	0	0	0	0	0	0	0	0	0	0	0
67949	Nifk	0.61	0.75	1.01	1.43	0.57	1.14	0.43	0.1	0.53	0.19	0.14	1.35	0.15	0.63	0	0.15	0.19	0.29	0.24	1.27	1.89	0	1.26	0	0.33	1	0.11	0.01	0	0.11	0.15	0	0.23	0	0	0	0	0.19	0	0	0.08	0	0	0.05	0.15
14467	Nipsnap2	0	0	0.43	0	0	0	0	0	0.1	0	0	0.25	0	0	0.23	0	0	0	0	0.37	0	0	0	0.58	0.07	0	0.34	0	0.7	0.22	0	0	0.32	0.6	0	0	0	0	0.26	0	0	0	0.09	0.22	0
270156	Nkapd1	0	0	0	0	0	0.03	0	0	0.03	0	0	0	0	0.01	0	0	0	0	0	0	0	0	0	0	0	0	0	0	0	0	0	0	0	0	0	0	0	0	0	0	0	0	0	0	0
329540	Nol4l	0	0	0	0	0.02	0.01	0	0	0	0	0	0	0	0	0	0	0	0	0	0	0	0	0	0	0	0	0	0	0	0	0	0	0	0	0	0	0	0	0	0	0	0	0	0	0
68077	Nop53	0.16	0.36	0	0.22	0.57	0.72	0.07	0	0.3	0	0.04	0	0.02	0.03	0	0	0	0.42	0	0.02	0	0	0	0	0	0	0	0	0	0	0	0	0	0	0	0	0	0	0	0	0	0	0	0	0
107823	Nsd2	0.02	0.01	0.1	0.03	0.06	0.03	0.01	0	0.01	0.01	0.01	0.01	0.01	0.02	0	0.01	0.01	0	0	0	0	0	0	0.01	0	0.01	0	0	0	0	0	0	0.01	0	0	0	0	0	0	0	0	0	0	0	0
234135	Nsd3	0.01	0	0	0.02	0.01	0.02	0	0	0	0	0.01	0	0	0	0	0	0	0	0	0	0	0	0	0	0	0	0.04	0	0	0	0	0	0	0	0	0	0.06	0	0	0	0	0	0	0	0
66647	Nsmce3	0	0.11	0.03	0.13	0.14	0.01	0.03	0	0	0	0	0	0	0	0	0	0	0	0	0	0	0	0	0	0	0	0.12	0	0	0	0	0	0	0	0	0	0	0	0	0	0	0	0	0	0
237859	Nsrp1	0	0	0.14	0.06	0.05	0.08	0.04	0.03	0.02	0	0	0.02	0	0.03	0.05	0	0	0.03	0	0	0	0	0	0.03	0	0	0	0	0	0	0	0	0	0	0.04	0	0	0	0	0	0	0	0	0	0
226499	Odr4	0.19	0.06	0.11	0.09	0.16	0.02	0.27	0.13	0.07	0.09	0.07	0	0.23	0.17	0.01	0.24	0.19	0.03	0.17	0.52	0	0.53	0.72	0.02	1.2	0.91	0.1	1.33	0.73	2.24	0.4	2.82	2.5	1.15	0.27	0.08	0.21	0.53	0.59	0.8	0.36	0.29	2.44	4.48	7.64
76055	Oga	0.16	0.09	0.29	0.41	0.26	0.12	0.13	0.04	0.2	0.1	0.09	0.09	0.1	0.07	0.06	0.07	0.04	0.04	0.04	0.05	0.02	0.24	0.15	0.06	0.04	0.06	0.56	0.03	0.06	0.05	0.24	0.95	0.64	0.14	0.04	0.02	0.12	0	0.36	0	0	0	0	0.06	0
432940	Otulin	0	0	0.49	0	0.02	0	0	0.03	0.06	0	0.02	0.06	0	0	0	0	0	0.08	0	0	0.09	0	0	0.03	0.05	0	0.02	0	0	0	0	0.03	0	0	0	0.11	0	0	0	0	0	0.22	0	0.12	0
223433	Otulinl	0	0	0	0	0	0	0	0	0	0	0	0	0	0	0	0	0	0	0	0	0	0	0	0	0	0	0	0.12	0	0	0	0	0	0	0	0	0	0	0	0	0	0	0	0	0
56401	P3h1	0.07	0	0.09	0.04	0.04	0.12	0.11	0.11	0.07	0.09	0.12	0.17	0.06	0.03	0.07	0.09	0.2	0.21	0.14	0.31	0.25	0.09	0.35	0.09	0.19	0.18	0.09	0.13	0.14	0.13	0	0.65	0.05	0.13	0.13	0	0.02	0.02	0	0	0	0	0	0	0
66180	P3h4	0	0	0	0	0.01	0	0	0	0	0	0	0	0	0	0	0	0.02	0	0	0	0	0	0	0	0	0	0	0	0	0	0	0	0	0	0	0	0	0	0	0	0	0	0	0	0
66950	Pacc1	0	0	0	0	0	0.03	0	0	0	0	0	0	0	0	0	0	0	0	0	0	0	0	0	0	0	0	0	0	0	0	0	0	0	0	0	0	0	0	0	0	0	0	0	0	0
11641	Pakap	0	0	0	0	0	0	0	0	0	0	0.02	0	0	0	0	0	0	0.01	0	0	0	0	0	0.01	0	0	0	0.11	0	0.03	0	0.07	0.08	0	0.16	0	0.01	0	0	0	0	0	0.08	0.02	0
12695	Patj	0	0	0	0	0	0	0	0	0	0	0	0	0.01	0	0	0	0	0	0	0	0	0	0.02	0.02	0.04	0	0.02	0	0	0	0	0	0.01	0	0	0	0.01	0	0	0	0	0	0	0.01	0
68371	Pbld1	0	0	0	0	0	0.02	0.07	0.79	0.45	0.17	0.24	0.6	0.24	0.12	3.55	1.4	2.56	7.4	10.09	6.26	5.8	10.25	7.89	6.65	18.01	13.27	10.97	17.39	10.16	12.19	30.99	12.37	16.73	24.72	27.72	28.98	56.49	51.59	51.17	44.21	29	39.3	27.43	31.18	35.85
68026	Pclaf	1.94	0.19	0.36	0.37	0.57	0.36	1.42	0	0.13	0.16	0.45	0.56	0.84	0.31	0.13	0.13	1.04	0	0	0	0	0	0	0	0	0	0.02	0	0	0	0	0	0	0	0	0	0	0	0	0	0	0	0	0	0
244895	Peak1	0	0	0	0	0	0	0	0	0	0	0	0	0	0	0	0	0	0	0	0	0	0	0	0.01	0	0	0	0	0	0	0.01	0.01	0	0.05	0.01	0	0	0	0	0	0	0	0	0	0
14976	Pfdn6	7.77	2.13	3.94	1.76	2.3	1.69	1.88	1.76	1.94	1.46	3.9	1.97	2.07	2.43	1.35	2.68	1.85	1.75	1.4	1.71	1.27	1.34	4.02	1.19	2.23	2.32	1.46	2.86	0.76	1.22	1.69	1.07	1.19	0.83	1.02	0.75	0.79	0.75	0.59	0	0.84	0.83	0.79	0.3	0
212974	Pgghg	0	0	0	0	0	0	0	0	0	0	0	0.02	0	0.04	0	0	0.02	0	0	0.02	0	0.05	0	0.12	0.11	0.07	0.1	0.13	0.04	0.02	0.01	0.12	0.18	0.25	0.56	0	0.29	0.14	0.15	0.07	0.16	0.06	0.05	0.22	0.54
72157	Pgm1	2.12	1.62	2.97	2.42	1.94	1.73	2.48	7.37	4.84	7.26	3.88	7.39	4.21	3.38	18.37	15.72	17.51	28.66	36.57	29.84	23.28	36.26	43.89	32.3	55.85	48.65	33.91	33.1	36.46	37.2	53.81	44.61	34.45	43.12	41.17	42.52	45.11	45.55	39.77	46.45	35.77	30.09	27.01	28.89	31.02
66681	Pgm2	0.67	0.32	2.85	0.45	0.9	0.61	0.96	0.94	0.5	0.8	1.19	0.63	0.81	0.24	0.26	0.62	0.31	1.33	1.63	1.69	1.55	1.24	0.48	3.94	0.59	0.53	0.66	0.79	6.38	1.11	2.66	1.66	0.8	0.95	6.65	1.66	1.38	0.98	0.95	0.1	1.63	0.28	0.18	0.8	0.19
338368	Pheta2	0	0	0	0	0.22	0.23	0	0	0	0	0	0	0	0	0	0.08	0	0	0	0	0	0	0	0	0	0	0	0	0	0	0	0	0	0	0	0	0	0	0	0	0	0	0	0	0
219024	Pip4p1	0	0	0	0	0	0	0	0	0	0	0	0.05	0	0	0	0	0	0	0	0	0	0	0	0	0	0	0	0	0	0	0.28	0	0	0	0	0	0	0	0	0	0	0	0	0	0
72519	Pip4p2	0	0	0.31	0	1.07	0.07	0.87	0.93	0.9	0.26	0.24	0	0.09	0.35	0.21	0.22	0	0	0	0	0	0	0.21	0	0.66	0	0.2	0.11	0.2	0.21	0	0	0.19	0	0	0	0	0.08	0	0	0	0	0	0.07	0
225845	Plaat3	0	0.3	0.43	0.75	0.25	0.35	2.02	0.11	0.34	0.15	1.41	0.26	3.52	0.38	0	0	0	0	0	0	0	0	0	0	0	0	0.11	0	0	0	0	0	0	0	0	0	0	0	0	0	0	0	0	0	0
114863	Plpbp	0.97	0.97	1.48	0.52	0.98	0.87	0.94	1.08	1.69	0.97	0.48	0.45	0.91	0.96	1.75	1.61	0.73	1.74	1.12	0.83	0.41	0.72	2.22	1.1	4.95	0.91	1.83	4.29	2.85	2.21	4.57	2.93	2.43	5.29	4.75	6.75	4.37	4.39	6.79	6.52	3.96	5.69	4.24	6.55	5.56
19012	Plpp1	0	0	0	0	0	0	0	0	0	0	0	0	0	0	0	0	0	0	0	0	0	0	0	0	0	0	0.05	0	0	0	0	0	0	0	0	0	0	0	0	0	0	0	0	0	0
50784	Plpp2	0	0	0	0	0	0	0	0	0	0	0	0	0	0	0.02	0	0	0	0	0	0	0	0	0	0	0	0	0	0	0	0	0	0	0	0	0	0	0	0	0	0	0	0	0	0
67916	Plpp3	0	0	0	0.02	0	0.05	0	0	0	0	0	0.09	0	0	0	0	0	0.15	0	0	0.14	0.16	0	0.31	0	0.56	0.45	0	0	0.45	0	0.89	0.68	0.64	1.28	0.41	0	0	0.46	0.22	0	0.21	0	0.41	0.21
66625	Pnisr	0.07	0	0	0	0	0	0.05	0	0	0	0	0	0.02	0	0	0	0.03	0	0	0	0	0	0	0	0	0	0	0	0	0	0	0	0	0	0	0	0	0	0	0	0	0	0	0	0
72050	Poglut2	0.22	0.04	0.06	0.01	0.11	0.02	0	0.09	0.02	0.01	0	0.01	0.06	0	0	0.11	0	0.1	0	0	0	0	0	0	0	0	0.02	0	0	0	0	0	0.01	0	0	0	0	0	0.03	0	0	0	0	0	0
68304	Poglut3	0.03	0	0.39	0.43	0.47	0.57	0.05	0.05	0.06	0.12	0.11	0.48	0.57	0	0.08	0.91	0.2	0.47	0.06	0.42	0.07	0.12	0.13	0.08	1.89	0.1	0.08	0.02	0.07	0.09	0.06	0.08	0.03	0.03	0.14	0.05	0.04	0.04	0.41	0.12	0	0	0.57	0.03	0.03
68734	Ppp4r3a	0.14	0.16	0.26	0.1	0.11	0.12	0.16	0.1	0.1	0.06	0.12	0.32	0.14	12.97	0.13	0.08	0.13	0.11	0.07	0.05	0.09	0.06	0.36	0.1	0.12	0.09	0.14	0	0.07	0.19	0.15	0.05	0.16	0.05	0.11	0.09	0.05	0.06	0.02	0.03	0	0.04	0	0.26	0.03
104570	Ppp4r3b	0.04	0.1	0.16	0.04	0.08	0.08	0.1	0.09	0.05	0.06	0.02	0.05	0.04	0.04	0.03	0	0	0.04	0	0	0.05	0	0.03	0.03	0	0	0.03	0	0	0.08	0	0	0.05	0	0	0	0	0	0	0	0	0	0	0	0
102182	Prmt9	0	0	0.09	0	0	0.02	0.03	0.31	0	0	0	0.31	0	0	0	0	0	0	0	0	0	0	0	0	0	0	1.27	0	0	0	0	0	0	0	0	0	0	0	0	0	0	0	0	0	0
66132	Prorp	0	0	0	0	0.4	0	0	0	0	0	0	0	0	0	0	0	0	0	0	0	0	0	0	0	0	0	0.03	0	0	0	0	0	0	0	0	0	0	0	0	0	0	0	0	0.01	0.06
229589	Prune1	0.36	0.1	0.36	0.24	0.42	0.14	0.35	0.22	0.39	0.18	0.06	0.46	0.14	0.38	0.37	0.18	0.24	0.6	0.34	0.36	0.38	0.3	0.38	0.38	0.46	0.56	0.36	0.45	0.31	0.84	0.29	0.56	0.52	0.22	0.28	0.21	0	0.54	0.07	0	0	0.16	0.09	0.82	0.06
70564	Prxl2a	0.42	0.38	0.65	0.48	0.84	0.37	0.6	1.15	0.72	0.64	0.54	1.25	0.77	0.88	1.66	1.97	1.24	3.63	2.28	4.82	2.56	3.17	3.91	2.95	6.05	2.89	4.43	4.64	3.76	8.56	3.43	3.46	6.75	4.82	9.22	11.24	1.92	7.64	4.83	2.47	2.33	1.58	1.54	2	2.33
66469	Prxl2b	0.06	0.14	0	0	0	0	0	0	0.02	0	0	0.21	0.14	0	0.03	0	0.06	1.74	0	0	0.04	0	0	0	0	0	0	0.11	0	0	0	0	0	0	0	1.22	0.26	0	0.17	0.34	0	0	0.19	0.24	0.64
66129	Prxl2c	0	0	0	0	0	0	0	0	0	0	0	0	0	0	0	0	0	0	0	0	0	0	0	0	0	0	0	0	0	0	0	0	0.09	0	0	0	0	0	0	0	0	0	0	0	0
110854	Ptpa	2.06	1.83	2.61	2.2	2.14	2.48	1.74	2.32	2.24	1.38	1.25	2.35	1.99	1.71	1.7	1.78	1.63	2.17	1.42	2.31	2.44	1.57	1.57	1	2.46	2.24	1.38	1.58	1.4	1.06	1.24	2.1	1.27	0.87	1.5	1.02	0.41	1.02	0.85	0.67	0.68	1.25	0.97	0.55	0.68
52874	Pum3	0.05	0.6	0.7	0.25	0.36	0.19	0.18	0.1	0.21	0.02	0.09	0.09	0.05	0.09	0.13	0.08	0	0.05	0.05	0	0.07	0	0.36	0.02	0.08	0.09	0.25	0	0.07	0	0	0.01	0.03	0.01	0	0	0	0	0.05	0	0	0	0.02	0	0
68114	Pwwp3a	0.01	0	0	0	0.31	0	0	0	0	0	0	0	0	0	0	0	0	0	0	0	0	0	0	0	0	0	0	0	0	0	0	0	0	0	0	0	0	0	0	0	0	0	0	0	0
78428	Pym1	0.74	1.18	2.13	0.27	0.36	1.04	0.14	0.3	0.23	0.93	0.39	0.09	0.78	1.32	0.82	0	0.11	0.4	1.19	0.92	0.18	1.78	1.43	1.12	1.12	2.09	1.1	2.54	0.68	1.72	1.52	2.99	1.99	1.31	3.12	2.75	1.05	1.36	2.53	1.26	0.49	2.55	0.34	0.54	1.25
106248	Qtrt2	0	0	0	0.08	0.04	0.09	0	0	0.03	0	0	0.04	0	0.02	0	0	0	0	0	0	0	0	0	0	0	0.21	0	0	0	0	0	0	0	0.05	0	0.04	0	0	0	0	0	0	0.02	0	0
19324	Rab1a	1.13	1.21	2.08	1.85	1.63	1.47	2.33	2.67	2.96	1.34	1.9	2.47	2.2	1.45	3.29	2.2	2.28	6.57	4.05	3.69	4.71	2.43	4.74	2.63	5.19	4.86	3.98	4.74	5.28	7.57	8.42	8.35	5.69	8.31	6.1	5.53	3.48	6.12	4	3.85	2.7	2.81	2.64	3.32	2.84
14694	Rack1	74.77	52.31	111.67	61	73.24	68.58	48.61	65.07	81.58	53.65	48.22	82.53	50.7	43.71	71.82	52.15	48.7	73.61	50.3	52.31	107.56	54.29	94.87	93.3	81.18	115.77	120.3	90.64	78.36	92.36	94.6	102.84	88.71	102.48	73.38	71.13	74.68	92.29	99.35	67.01	54.29	41.57	53.64	53.82	56.89
78287	Rbsn	0.01	0	0.04	0	0	0	0	0	0	0	0	0	0	0.05	0	0	0	0	0	0	0	0	0.02	0.04	0	0	0	0	0.03	0	0	0	0	0	0	0	0.09	0	0.05	0	0	0	0	0	0
94254	Rcc1l	0	0	0.01	0	0	0.02	0	0.12	0	0	0	0	0	0	0	0	0	0	0	0	0	0	0	0	0	0.02	0	0	0	0	0	0.06	0.02	0	0	0.03	0	0.03	0	0	0	0	0	0.02	0.02
216454	Rdh16f2	0	0	0	0	0	0	0	0	0	0	0	0	0	0	0	0	0	0	0	0	0	0	0	0	0	0	0	0	1.66	2.14	4.44	2.61	2.76	2.22	2.88	4.34	3.25	6.39	5.39	4.63	5.84	5.47	2.2	4.07	3.83
227446	Relch	0	0	0	0	0	0.01	0.01	0	0	0	0.02	0.01	0	0	0	0	0	0.01	0	0	0.01	0.01	0.02	0.02	0.03	0.01	0.04	0.03	0	0	0	0	0.04	0.01	0	0	0	0	0.02	0	0	0.01	0.04	0.02	0.02
227298	Retreg2	0.03	0	0	0.02	0	0	0	0	0	0.04	0.05	0	0.04	0	0.07	0.05	0.02	0	0	0	0	0	0	0	0	0.17	0.45	0	0	0.56	0	0	0	0	0.05	0	0	0	0	0	0	0	0	0	0.84
67998	Retreg3	0	0	0	0.05	0.04	0	0.04	0.07	0.05	0.04	0.05	0.07	0.04	0	0	0.06	0.02	0	0.06	0	0.08	0.04	0.01	0	0.09	0.57	1.59	0.08	0	0.14	0	0.17	1.57	0.05	0	0.16	0	0.2	0	0.07	0.06	0	0	0.11	0
66462	Rex1bd	0.02	0	0.45	0	0.43	0.26	0	0.02	0.07	0	0.03	0.02	0	0	0	0	0	0.02	0	0	0	0	0	0.03	0	0	0	0	0	0	0	0	0.07	0	0	0	0	0	0.12	0.04	0	0	0.3	0.33	0.23
226089	Ric1	0	0	0	0	0	0	0	0.01	0	0	0	0	0	0	0	0	0	0	0	0	0	0	0	0	0.01	0.01	0.01	0	0.02	0	0	0	0.02	0	0	0	0	0	0	0	0	0	0	0	0
101489	Ric8a	0.05	0.05	0.71	0.07	0.33	0.02	0.05	0.04	0.03	0.01	0.04	0.07	0.03	0.33	0.02	0.01	0.1	0.01	0	0	0	0	0.06	0.01	0	0	0.04	0	0.01	0	0.03	0	0.02	0	0	0	0.01	0	0	0	0	0	0	0.02	0
15473	Rida	1.14	1.22	5.52	1.88	3.38	1.9	4.56	10.64	8.7	5.98	5.63	6.23	6.97	3.09	15.8	9.98	14.39	25.6	24.01	31.36	28.66	39.5	44.21	33.07	67.24	77.53	71.6	141.37	123.71	141.92	154.41	239.69	160.52	240.82	229.73	273.94	265.07	402.98	318.23	559.98	516.45	334.56	434.05	425.45	367.91
71952	Riox1	0.22	0.13	0.01	0.05	0.11	0.35	0.13	0.05	0.07	0.06	0.05	0.17	0.04	0.05	0.06	0.13	0.08	0.04	0.03	0.02	0.02	0	0.08	0.06	0.15	0.37	0.83	0	0	0	0	0	0.06	0	0	0	0	0	0	0	0	0	0	0	0
67014	Riox2	0.38	0.25	0.62	0.1	0.33	0.53	0.16	0.25	0.32	0.11	0.19	0.21	0.3	0.14	0.2	0.07	0	0.09	0.13	0.04	0	0	0	0	0	0	0.25	0	0.12	0	0	0	0	0	0	0	0	0	0	0	0	0	0.08	0.02	0
75687	Ripor1	0.01	0.15	0.01	0.03	0.01	0.02	0.01	0	0	0	0.08	0	0	0.03	0	0	0	0.01	0	0	0	0	0	0	0	0.03	0	0	0.02	0	0	0	0	0	0.01	0	0	0	0	0	0	0	0	0	0
76482	Rmc1	0.01	0.01	0	0.01	0	0.03	0.01	0.01	0	0	0	0	0	0	0	0	0	0.04	0	0	0	0	0	0	0	0	0	0	0	0	0	0	0	0	0	0	0.2	0	0	0	0	0.04	0	0	0
20822	Ro60	0.03	0.02	0	0	0.02	0.01	0	0.01	0.01	0.01	0	0.03	0	0.02	0.04	0	0	0.03	0.04	0.02	0	0.01	0	0	0	0	0	0	0	0	0	0	0.02	0	0	0	0	0	0	0	0	0	0	0	0
19889	Rp2	0	0	0	0.07	0.1	0.08	0.05	0	0.19	0	0.08	0.05	0.11	0	0	0	0.11	0	0	0	0	0	0	0	0	0.35	0.17	0	0.47	0.08	0	0	0.1	0	0.73	0	0	0	0	0	0	0	0	0	0
27981	Rsrp1	0	0	0	0	0	0	0	0	0	0	0	0.18	0	0	0	0	0	0	0	0	0	0	0	0	0	0	0	0	0	0	0	0	0	0	0	0	0	0	0	0	0	0	0	0	0
[truncated: 7,400 more rows]

## Sheet: Sheet3
Gene.ID	GeneSymbol	E12.5.1.Exp018736	E12.5.2.Exp018737	E12.5.3.Exp018738	E13.5.1.Exp018739	E13.5.2.Exp018740	E13.5.3.Exp018741	E14.5.1.Exp018742	E14.5.2.Exp018743	E14.5.3.Exp018744	E15.5.1.Exp018745	E15.5.2.Exp018746	E15.5.3.Exp018747	E16.5.1.Exp018748	E16.5.2.Exp018749	E16.5.3.Exp018750	E17.5.1.Exp018751	E17.5.2.Exp018752	E17.5.3.Exp018753	E18.5.1.Exp018754	E18.5.2.Exp018755	E18.5.3.Exp018756	D1.1.Exp018757	D1.2.Exp018758	D1.3.Exp018759	D3.1.Exp018760	D3.2.Exp018761	D3.3.Exp018762	D5.1.Exp018763	D5.2.Exp018764	D5.3.Exp018765	W1.1.Exp018766	W1.2.Exp018767	W1.3.Exp018768	W2.1.Exp018769	W2.2.Exp018770	W2.3.Exp018771	W3.1.Exp018772	W3.2.Exp018773	W3.3.Exp018774	W6.1.Exp018775	W6.2.Exp018776	W6.3.Exp018777	W8.1.Exp018778	W8.2.Exp018779	W8.3.Exp018780
[truncated: 6,458 more rows]

[truncated: 5 more sheets: Sheet4, Sheet5, Sheet6, Sheet7, ReadMe]
