# Supplementary material for: A time-resolved multi-omic atlas of the developing mouse liver
Source: HighWire-hosted journal article supplement (doi:10.1101/gr.253328.119), 2020-02-01
Supplement: Supplemental_Table_S2.xlsx [file Supplemental_Table_S2.xlsx]

## Sheet: Sheet1
GeneSymbol	E12.5_R	E13.5_R	E14.5_R	E15.5_R	E16.5_R	E17.5_R	E18.5_R	D1_R	D3_R	D5_R	W1_R	W2_R	W3_R	W6_R	W8_R
Pacrgl	5.02128	3.61465	3.55716	3.17983	1.85784	2.01143	2.36693	3.06577	1.90567	1.93068	2.36256	3.20831	2.30286	1.22557	2.45051
A2ml1	0	0	0	1.54109	2.78428	5.22761	2.59038	1.29314	1.82682	2.02367	1.93509	3.48801	2.06969	2.39377	3.94059
Abhd18	0	0	0	1.05697	0	1.74562	1.80263	1.13792	1.79065	2.6757	2.79585	3.11401	3.22688	1.90356	1.95506
Abitram	4.61677	4.72516	3.13953	2.73657	2.34066	1.45083	1.4563	1.228	1.55665	1.34967	0	0	1.02038	0	0
Abraxas1	6.49573	4.31971	6.21223	5.6269	3.32765	3.82494	3.61587	3.54698	3.76779	2.54469	2.75144	3.07239	2.93696	1.5429	1.70733
Abraxas2	7.81194	5.02229	7.47734	5.91587	5.05637	5.73313	5.37826	6.04393	5.94808	7.10525	5.98867	6.20154	5.91893	4.4821	4.66288
Ackr1	26.3722	33.2998	32.5697	29.6174	27.6165	22.3391	13.782	5.13845	5.79924	2.55135	2.69631	1.76022	0	1.17635	0
Adgra2	6.96744	5.06908	2.95723	2.7405	3.71423	2.84345	3.8391	4.31956	4.6003	5.18678	3.95436	2.92356	1.8259	1.02004	0
Adgra3	9.88536	8.4725	6.99795	5.1205	3.57782	2.52926	2.36725	3.23207	4.04946	5.28853	4.2927	4.10855	4.10926	4.74221	3.91382
Adgre1	5.53551	6.85639	8.94339	10.5006	12.9348	12.5346	13.374	11.7888	14.2254	20.8143	9.07508	5.77468	4.86734	5.98244	2.53235
Adgre4	0	0	0	0	0	0	0	2.36485	3.65598	4.1986	2.60704	2.15572	1.78795	0	1.04266
Adgre5	5.84584	8.09758	6.73704	8.21219	14.3711	9.8874	11.1114	16.3303	16.8691	18.3678	12.8381	10.8024	7.52261	6.33286	5.59868
Adgrf1	0	0	0	0	0	0	2.02137	0	2.59978	3.72478	1.78653	3.6167	2.75327	2.65747	1.04951
Adgrf5	2.62588	1.54996	1.79557	1.96451	1.48437	1.89101	2.11804	3.44837	3.21634	4.50212	3.7991	3.96451	3.74756	1.78608	1.29956
Adgrg1	49.1986	60.4729	43.5315	36.3172	35.8095	18.2564	19.5555	20.3125	17.4243	14.8291	13.2216	9.08629	1.92828	0	0
Adgrg2	0	0	0	0	0	0	0	1.30613	0	0	0	1.68891	0	0	0
Adgrg3	4.87578	3.98491	3.33894	4.09447	5.58765	5.39135	5.91818	6.906	4.2958	4.21571	3.25244	2.92705	3.60097	1.04286	1.13172
Adgrl1	6.75098	5.55438	3.48338	3.62168	2.44973	2.16863	2.49735	2.72233	2.81094	2.52348	2.66657	4.65244	2.02471	0	0
Adgrl2	2.93886	1.85601	1.62158	1.60213	2.04994	2.86407	2.75791	3.09194	4.65541	5.98468	4.42584	3.717	3.08495	4.02671	5.46769
Adgrl4	2.84583	1.03411	1.3541	1.09523	0	1.12355	1.01099	1.78171	1.94861	3.05267	2.60603	2.5405	2.08582	0	0
Adgrv1	0	0	0	0	0	0	0	0	0	0	0	1.21367	0	0	0
Afdn	6.75225	5.61052	4.22942	2.23119	2.98958	2.24705	2.59871	5.6066	2.72605	3.64085	3.63054	11.124	4.23426	3.70723	11.1179
Afg1l	2.0249	1.55372	1.61222	1.51539	1.40504	1.7295	1.78718	1.17153	2.21612	1.90119	2.7158	2.52574	2.67874	3.15119	2.54348
Albfm1	0	0	0	1.95237	1.66705	4.03505	6.6081	17.5937	21.1546	36.9555	36.6394	51.5235	25.675	19.3322	10.6574
Angptl8	9.88928	9.94023	14.0069	28.4973	45.3704	47.8231	152.52	43.3704	48.3462	44.4582	71.0956	29.2465	32.4291	66.6659	45.9468
Aopep	1.42217	1.27127	1.40865	1.38481	1.19478	1.70726	1.91541	1.78792	1.69295	1.63612	2.05467	1.85124	2.87735	1.27502	1.7151
Arhgap35	4.06781	4.13658	3.81806	3.9561	4.60836	4.60158	4.39883	4.45159	6.31497	7.68316	6.36696	6.10859	7.27733	8.98937	8.56067
Arhgap45	18.7327	18.2056	15.4478	15.8255	19.6806	20.6729	18.1124	18.7459	13.5178	11.6052	8.92935	6.00447	3.51716	1.92416	2.38504
Armh3	2.95537	3.97526	2.614	2.60636	2.82807	2.53805	1.84462	2.65903	2.48513	3.57839	2.94206	2.1985	2.80629	2.16075	1.43927
Armt1	10.414	9.15828	7.43953	6.1602	5.31012	3.45554	5.3296	5.889	5.65922	4.49382	4.34767	2.44487	2.95352	3.49179	3.16426
Arpin	2.61665	3.46433	2.3421	2.85825	1.75186	2.22168	1.85583	1.55511	2.73197	3.44868	4.2427	2.53999	2.26688	3.38219	4.06995
Atg101	19.6051	24.6354	16.2457	14.2351	17.7308	14.5927	16.0694	18.9682	18.7469	17.6446	22.0498	24.5559	36.0121	37.9315	17.283
Atp23	7.11797	6.28697	5.28663	4.53958	3.78034	4.40596	2.76559	2.9852	3.18363	3.54128	2.35286	2.18334	2.83815	2.82699	1.19713
Atp5md	258.801	232.651	258.546	244.541	220.879	252.324	259.296	229.767	257.179	210.108	259.768	233.075	356.863	247.878	234.461
Atp5mpl	179.362	163.319	207.976	177.611	151.923	184.176	161.827	175.069	180.603	138.399	182.548	207.858	231.442	149.456	123.847
Atpsckmt	7.22198	5.9654	6.88335	4.55582	4.41626	4.6737	5.95929	6.22983	5.50485	5.36637	7.22432	7.13517	6.8749	6.39661	4.55161
Azin2	0	0	0	0	0	0	0	1.24728	0	1.62897	1.72812	4.65331	0	0	0
B3glct	3.4752	3.52568	3.61709	2.71582	2.11526	1.81419	1.36612	1.4047	1.01529	1.19459	1.14666	1.00605	0	0	0
B4gat1	7.4184	7.66541	5.83252	4.98834	5.48865	5.57005	6.22657	7.22857	7.5203	11.154	9.20613	10.0916	10.7295	12.288	8.09078
Babam2	15.7924	20.2893	14.8477	9.79229	15.1888	10.9993	9.71415	9.75527	12.7694	8.79798	11.0862	10.2836	6.6559	15.7552	9.82451
Bclaf3	3.3653	1.31877	2.64855	3.1146	1.04117	1.35288	0	0	0	0	0	0	0	0	0
Bco1	6.15813	5.14421	4.75728	5.61184	3.03826	4.44015	4.59818	9.92777	13.0368	12.6253	15.2343	10.74	7.11369	2.24328	3.50867
Bex3	194.264	180.552	178.508	184.111	149.752	150.499	112.756	118.58	115.53	77.1284	93.6326	37.78	11.6448	1.68096	1.74517
Bicdl1	1.29046	1.142	1.62568	0	1.12926	0	0	1.07051	2.01327	1.04999	1.33309	1.42577	1.3912	0	0
Bicra	3.58417	4.03276	2.71562	2.91232	3.20302	2.79551	2.36145	2.69965	2.64416	2.39931	2.1775	1.63308	1.20426	0	1.48556
Bicral	3.37629	3.38307	3.44912	3.79634	3.11289	2.5636	2.05319	1.92173	1.87268	2.3645	1.8323	1.70802	1.79916	1.42884	1.65597
Bmt2	1.93018	0	1.52263	1.63378	1.10269	1.61334	1.47676	1.82666	1.69237	1.91429	1.37785	1.71381	1.4031	0	1.02566
Borcs5	4.61669	7.10121	4.66103	4.18489	3.70593	2.74075	3.12012	3.55338	4.26377	3.3303	2.60386	2.06089	3.69572	6.86881	4.31363
Borcs6	6.46858	9.4631	5.92421	5.11069	7.48363	8.85149	7.82625	8.12307	6.12307	5.83419	6.55413	5.98343	7.0499	6.77266	5.2698
Borcs7	3.83527	3.23773	3.42161	3.3769	2.87502	3.24632	2.57177	4.21405	2.99595	3.13639	3.6359	3.52168	4.62364	1.98724	2.30365
Borcs8	14.055	17.7069	21.5154	8.3255	13.8175	7.78334	11.13	8.32923	9.10135	5.98145	9.8501	6.66666	6.961	8.58462	6.2256
Bud23	30.5175	39.5183	44.9345	21.9188	17.1664	21.3472	16.9138	16.5756	17.9873	15.6021	23.4373	9.6039	20.6901	19.4006	11.5538
C1qtnf12	33.6636	63.2207	60.8577	61.0157	54.6204	38.7339	27.4878	26.2304	19.992	10.1532	7.93912	3.39094	1.28764	0	2.16367
C1s1	12.2381	9.98677	21.0257	34.9365	46.191	70.6785	75.5292	72.0231	109.687	154.886	136.101	152.21	102.345	111.77	128.967
C1s2	0	0	0	0	0	0	0	0	1.55054	2.24139	1.73018	2.45947	1.13028	1.8127	1.50583
C9orf72	1.60255	1.31574	2.2168	1.49964	1.52698	2.35418	2.69426	2.70777	2.3459	2.48494	2.07127	2.94776	2.46436	1.22493	4.55982
Cabcoco1	0	0	0	0	0	1.48312	1.92986	1.69915	1.76223	2.05573	1.87104	5.24643	3.07644	0	0
Calhm6	0	0	0	1.22454	1.11239	0	1.7075	2.68126	1.76784	1.4851	1.84409	1.05318	1.04199	2.12974	1.0072
Card19	7.31838	9.82483	7.20705	7.87277	11.6822	11.609	11.0411	16.3386	11.0265	8.69351	10.6611	9.59942	14.3305	10.4029	8.89071
Carmil1	0	0	0	0	0	0	0	0	0	0	0	0	0	0	1.27354
Carmil2	3.05137	2.83327	2.83174	2.43221	2.87662	4.67213	4.14236	5.99567	2.4082	1.40301	1.62609	0	0	0	0
Carmil3	2.43378	1.70691	1.21559	1.06485	0	0	0	0	0	0	0	0	0	0	0
Carnmt1	19.7521	12.2035	16.816	13.9222	7.42977	6.00904	5.9071	4.92375	5.95161	5.43128	4.55542	4.41841	3.93884	2.9237	3.47764
Castor1	1.8207	2.20418	1.93581	1.5202	2.00818	1.18075	0	1.35508	2.14147	1.68651	1.31275	1.15847	0	0	1.08162
Cavin1	12.7062	9.1537	9.67949	9.79831	16.1593	16.7291	15.5784	11.2884	11.782	11.0522	8.8882	7.22202	4.84189	1.82282	1.28008
Cavin2	13.1637	7.90662	10.4336	10.2535	7.1508	7.26463	8.11573	11.6521	9.92703	12.6933	9.41408	8.85139	8.34785	1.75657	1.45275
Cavin3	6.06378	6.94528	3.65265	2.68952	4.56712	3.25652	4.61614	3.68282	5.29147	5.05979	3.98538	2.41451	2.2485	1.05181	0
Cbarp	2.54494	2.64001	1.64821	1.36602	1.56032	2.05838	0	0	0	0	0	0	0	0	0
Ccdc186	2.89936	1.15806	3.14279	3.01224	1.51077	2.09666	2.06754	1.87477	1.6398	1.41056	1.6501	1.68574	1.20614	0	1.32833
Ccdc189	4.92902	4.84594	5.80178	4.87071	4.33085	4.22072	4.48099	4.80906	2.65452	2.42245	2.12886	2.96285	3.30987	3.32635	3.68586
Ccdc191	2.10841	0	1.49485	1.58239	1.31672	1.83329	1.29011	1.60936	1.04853	1.08642	0	1.96246	1.10815	0	0
ccdc198	0	0	0	0	0	0	0	0	0	0	1.03936	0	0	0	0
Ccdc92b	24.6541	31.1522	29.7272	26.9434	32.0874	25.6033	14.8956	6.08556	6.1287	1.99218	1.68406	0	0	0	0
Ccdc9b	0	0	0	0	0	0	1.03655	1.62836	1.25012	1.23597	1.12296	1.2408	1.04108	0	0
Ccn1	7.78091	6.97708	3.65112	7.23498	4.6908	4.97463	8.92003	2.32822	5.55425	8.64246	7.71076	6.2548	2.79307	3.5638	4.25894
Ccn2	3.22759	1.89307	1.48779	1.1741	1.59342	1.383	2.98598	1.78725	1.46506	3.27831	2.34511	3.44746	5.65857	0	1.56261
Ccnq	17.9269	16.3892	13.2667	13.0592	8.68233	8.53657	7.4576	11.9214	8.4961	7.3529	8.60721	8.50163	6.67401	5.32454	4.59201
Ccpg1os	0	1.04127	0	1.00187	0	0	1.00165	1.64151	1.15842	1.70925	1.1391	3.74636	2.99971	3.00666	2.03974
Cd300c2	2.15351	2.59663	3.94315	4.39086	5.66807	6.19361	9.13633	9.65528	8.82797	8.31392	6.50966	5.86986	4.52584	3.85878	3.18935
Cebpzos	6.50715	6.97863	8.34675	7.71768	6.92526	6.85801	5.99064	6.82273	7.42137	7.78911	10.1122	9.97011	8.90213	6.69921	5.25664
Cemip2	5.54263	3.70346	3.59702	3.49201	3.33414	4.0499	4.06128	3.41231	4.30215	3.86444	2.9829	2.83012	2.26894	0	0
Cenps	9.90933	11.9068	11.5903	10.1216	6.73297	5.07084	3.88302	2.888	5.08228	2.31409	3.98934	1.61247	2.20383	0	0
Cenpu	6.43996	4.70814	6.72	5.80896	4.09661	2.58495	2.38633	2.37046	2.98816	1.91587	1.76927	1.07957	0	0	0
Cenpx	66.1599	79.8682	68.73	55.6424	51.255	45.7318	32.7095	38.5178	34.7283	33.6006	36.7314	32.8411	41.5944	52.2918	36.6924
Cep131	5.68553	4.66055	3.74577	3.4843	3.3296	3.06284	2.72633	3.59218	2.5345	1.95338	2.54041	3.03836	2.33569	1.418	1.1788
Cep162	1.10382	0	1.46778	0	0	0	0	0	0	0	0	0	0	0	0
Cep295	3.88004	1.06804	3.87313	3.7759	1.16575	2.13573	1.56393	1.48718	1.29063	1.52539	1.07359	0	0	0	0
Cep83	10.0319	3.02936	9.21804	9.76599	2.52154	5.29478	4.20862	3.50369	3.43131	2.9476	2.77581	2.83124	1.91645	0	1.45026
Cfap126	1.55707	1.65795	0	1.10418	1.18102	0	1.23232	0	0	0	1.81785	0	1.04255	1.30647	1.39034
Cfap20	18.3368	16.5261	17.2142	16.3987	11.9911	10.9345	10.3086	14.5593	15.8142	18.3532	14.5936	28.1838	11.6356	11.0851	6.38005
Cfap298	24.8454	23.1772	21.4342	14.8982	11.7708	9.72643	10.4018	10.7741	10.0935	7.72321	7.8744	6.74578	12.3541	14.3104	12.7445
Cfap36	7.56345	3.83631	6.33285	6.28525	3.23845	5.04724	4.05018	4.56253	4.47709	5.02313	4.40291	4.32378	6.56561	2.68956	3.61187
Cfap410	2.9093	2.48447	1.55827	1.93162	1.32532	1.68504	1.69986	2.90016	2.49039	2.42527	1.9949	3.46131	2.04305	2.42988	1.85989
Cfap44	0	0	0	0	0	0	0	0	0	1.14287	0	0	0	0	0
Cfap57	0	1.11931	0	0	0	0	0	0	0	0	0	0	0	0	0
Cfap97	1.64242	1.03001	2.01518	1.81939	1.70643	1.09783	1.23812	2.11765	0	1.58827	1.0565	1.63241	1.17373	0	0
Cgas	0	0	0	0	0	0	0	0	0	1.01524	0	0	0	0	0
Chil1	0	0	0	2.49209	6.84424	12.0821	10.2042	6.04069	4.42739	5.46324	3.09348	0	0	0	0
Chil3	0	0	0	1.96323	6.79765	26.9285	38.3956	27.6318	19.1906	23.7883	14.1696	0	0	0	0
Ciao2a	86.8409	76.1056	89.9189	75.069	52.796	51.8585	42.3951	37.7028	38.7085	29.5097	35.8218	26.1305	38.0784	29.8668	24.3168
Ciao2b	30.1668	32.1105	20.6942	19.065	23.2153	10.0945	16.4934	12.9136	15.8308	14.5279	18.2475	10.8989	14.8385	19.1839	18.123
Ciao3	8.33171	10.0598	7.26253	6.68996	7.58774	6.62695	6.50724	7.20864	5.98536	5.78694	6.43058	5.3808	6.34305	10.6313	7.45588
Ciart	0	0	0	0	0	0	0	0	0	0	0	0	1.41322	0	0
Cip2a	11.7874	4.09539	12.275	10.7405	3.47884	6.43591	3.76709	3.11294	4.5436	2.65454	3.53112	1.81375	0	0	0
Cipc	8.58491	8.02097	7.22861	5.85146	4.42088	3.57601	3.4646	4.27493	3.2406	3.25968	3.13483	2.87543	3.7336	4.78129	6.73192
Clca3a1	2.38087	1.20329	2.44995	3.1744	2.20628	4.8284	7.41831	8.1803	6.42524	7.03501	6.51608	4.87021	2.57017	0	1.67935
Clcn4	7.40679	4.77892	6.63914	5.5661	4.52539	6.05546	6.07436	6.40001	6.64055	6.17058	5.76473	7.42947	9.7524	6.64161	8.92218
Cldnd1	14.0377	11.8319	11.2335	10.1151	8.69268	7.6685	5.57836	8.00722	8.35545	8.15754	8.20986	7.13159	6.13199	4.61938	5.77956
Cltrn	0	0	0	0	0	0	1.04486	0	0	0	0	0	0	0	0
Cnot9	22.7592	24.8027	20.9635	18.3626	15.4804	11.6537	10.0347	11.6436	11.745	10.2196	11.25	6.74047	6.96955	4.17225	3.98334
Cntrl	8.68945	1.5148	5.14408	5.69183	1.84284	3.75174	6.66543	5.66735	4.16057	4.30213	5.07699	4.8973	2.70295	0	1.43077
Coa7	6.80231	4.48551	4.15985	3.84602	3.90359	3.51088	3.89376	5.84238	5.70107	5.91415	6.85434	6.06131	6.84382	5.61703	5.14981
Cop1	15.0792	10.3994	16.2446	13.811	10.783	9.89415	6.91379	6.58274	7.17788	6.33992	5.80541	5.15592	5.3327	3.32958	4.49814
Cops9	69.7335	71.0242	63.6438	54.2122	53.9053	57.8369	54.5447	54.045	45.4386	37.1687	43.3728	42.9266	51.8833	50.6353	41.6997
Coq8a	2.01901	3.16566	3.65578	7.23974	14.7795	11.1724	9.4807	8.28036	16.3906	28.7451	30.9349	51.4084	84.5696	120.039	37.0367
Coq8b	8.35681	13.4225	8.89193	10.6676	16.8196	13.2201	12.3202	14.3373	11.5897	12.1757	12.7824	16.3047	9.23564	8.80401	5.94632
Cptp	5.86838	8.00397	5.88296	4.83084	4.72253	3.96318	3.53163	4.82704	4.37059	4.45859	3.93184	3.59847	5.18324	7.14949	4.34893
Cracr2a	0	0	0	0	1.18344	0	0	0	0	0	0	0	0	0	0
Cracr2b	2.73506	2.50793	1.91472	2.47628	3.34533	4.56656	4.96668	4.88593	4.32385	3.49036	2.97328	4.43461	2.73178	2.24659	1.9281
Crybg1	0	0	0	0	0	0	1.26307	2.16541	2.66291	3.75157	3.12969	3.68267	3.83411	1.79218	1.80761
Cryzl2	5.83483	5.70643	5.57534	7.25496	7.05488	7.79613	10.1598	8.99815	13.1189	16.7062	16.2627	17.4432	12.2613	12.8754	7.90433
Csta2	1.57476	1.7087	2.86322	6.98233	24.0137	77.5352	89.7072	66.2217	34.4562	34.3682	23.6484	0	0	0	0
Csta3	0	0	1.12435	0	3.51738	7.49617	8.69698	2.93907	3.17376	4.86577	3.30032	0	0	0	0
Cstdc4	25.6645	17.2588	46.6995	118.72	239.424	489.831	411.167	339.853	155.441	172.966	116.423	4.69147	0	0	1.32572
Cstdc5	20.2047	17.7495	53.002	111.208	215.058	262.66	285.83	250.3	129.44	144.455	90.2512	4.43372	1.0802	0	0
Cstdc6	0	0	1.27899	1.19612	3.08184	7.21963	6.87757	1.84077	1.44877	2.96986	1.23299	0	0	0	0
Cyb5a	99.1646	99.6546	37.5136	56.3502	128.205	167.816	195.677	33.2781	331.611	366.491	418.029	499.871	608.481	399.593	309.364
Cybc1	18.1194	13.6034	13.6834	14.7401	11.668	12.4983	11.4268	10.3482	9.38772	6.82143	6.88092	5.34852	3.7286	3.43754	3.75709
Cyp2c23	4.2747	6.39966	10.1686	18.2984	26.2118	25.7816	36.3613	55.0735	74.0975	104.172	103.663	73.7955	19.7485	164.648	67.5073
Cyren	5.22351	5.98313	5.76059	4.84499	5.31091	5.13172	5.9348	5.23914	5.00862	6.21288	6.31141	6.94232	3.86927	4.44381	4.25192
Czib	13.8189	9.01674	9.8455	9.21772	7.63076	9.78417	9.93146	8.87055	11.6631	9.63132	10.817	10.7773	10.3713	7.55791	7.82662
Dcaf1	12.4832	11.0382	12.8797	10.2111	7.37853	7.52911	3.87317	5.07655	6.20243	4.837	4.92206	3.47872	2.64646	2.0728	2.6046
Ddias	3.64237	1.31249	3.17534	2.6581	1.04144	1.83284	1.08092	0	1.06907	0	0	0	0	0	0
Dele1	20.9976	22.1443	19.7769	16.4875	17.7421	11.2401	9.78571	10.8454	10.8474	13.2641	12.716	12.7784	11.3946	12.0574	7.4724
Depp1	2.47438	2.43244	4.08823	9.43178	44.4445	54.1702	92.4663	43.2171	50.3166	56.6638	37.0486	187.975	85.3504	79.0115	20.3052
Dglucy	0	0	0	0	0	0	0	0	1.14634	1.88752	1.48417	1.35888	4.74614	6.45799	5.7438
Diaph1	18.9759	21.5865	17.5274	15.5796	18.5094	14.1489	14.4775	16.0852	15.3737	15.7751	12.4819	13.1411	12.399	11.7872	9.77189
Diaph2	0	0	0	0	0	0	0	0	0	0	0	1.02943	1.00094	0	0
Diaph3	10.9438	6.47295	13.4327	14.3266	6.90701	7.36748	4.70223	3.0123	5.00364	2.56613	1.92911	0	0	0	0
Dipk1a	6.25619	3.9188	6.12961	4.2774	2.73255	2.93324	3.93423	4.25456	2.76048	2.45643	1.92565	3.50831	4.43417	2.4983	2.85308
Dipk1b	2.18105	1.96033	0	0	0	0	0	0	0	0	0	0	0	0	0
Dipk2a	7.6754	5.28908	7.50491	8.62517	5.50233	7.11096	5.57397	12.5433	13.4407	17.6246	15.4563	20.2545	5.76716	3.47497	6.2955
Dmac1	45.8911	51.864	39.2728	35.168	33.8258	37.2492	30.3556	25.9545	28.6763	23.8721	28.6058	22.1994	29.3144	31.1019	22.359
Dmac2	7.2998	7.15698	5.15544	4.6999	5.84424	6.57045	7.34863	7.92169	6.46843	6.36295	7.91601	9.17807	14.4144	12.4789	12.0466
Dmac2l	4.58115	2.95464	4.31372	4.05261	2.16703	3.00807	2.8782	4.28323	2.54554	2.66847	3.82344	3.97257	3.13934	1.58767	1.52066
Dnaaf5	8.5029	8.7221	5.94561	4.63269	4.9058	2.54015	2.87188	3.00321	3.21829	2.41179	2.61687	1.73322	1.37919	2.84951	2.18552
Dop1a	1.2293	0	1.24748	1.39502	0	1.04996	1.29376	1.68373	1.78344	1.7702	1.52521	1.71608	1.19331	0	1.33114
Dop1b	3.98865	4.94996	5.2954	6.73546	8.33963	6.95964	3.97726	2.4716	2.54083	3.02754	3.15956	1.59213	2.87918	3.06699	2.17698
Dus2	8.88154	8.16347	6.61541	7.30729	5.27156	5.65906	3.5995	4.92565	6.38342	5.46871	8.33818	4.91422	5.94379	4.48024	3.22123
Ecpas	11.2273	6.56171	10.5186	9.51678	6.45951	6.31986	5.70713	8.45322	6.32652	6.39952	3.28079	5.18464	6.68877	2.21457	5.67478
Edrf1	6.7966	5.50963	7.26951	7.35467	4.24473	4.06181	4.17068	3.21276	3.27814	2.62061	3.22364	3.09642	3.83242	2.24484	1.98483
Eef1akmt1	13.5726	15.1493	11.5158	8.59868	5.46158	5.67851	3.2904	4.01536	4.38905	3.70464	4.11702	3.46469	5.10586	6.52221	5.40847
Eef1akmt2	8.21267	5.57942	4.32356	6.14329	3.52449	5.07349	3.90705	2.09013	2.9806	3.61115	3.27194	4.04582	2.80335	1.07787	1.10671
Eef1aknmt	8.35912	9.52994	5.793	4.93134	4.69279	4.07441	3.14109	4.08838	3.03967	2.56677	2.05903	2.07407	1.87655	2.189	1.45817
Eef2kmt	8.30905	9.1418	8.08027	6.35402	5.92185	6.24293	5.67653	5.85881	5.94036	4.44127	5.83553	6.3379	5.31159	5.97499	5.54513
Efl1	5.63029	4.43506	4.89161	3.69578	3.88127	3.12247	3.08551	2.75589	2.90353	2.78947	2.2065	3.03567	1.90337	2.00595	2.14242
Eipr1	13.2643	18.38	12.7356	10.788	11.8224	7.72878	6.06792	6.97748	6.09593	4.2501	4.63366	2.86993	6.02291	8.33035	5.58068
Eloa	19.0591	16.7864	19.0496	17.9515	16.0178	12.8547	10.415	10.1805	11.6966	9.01986	8.62228	5.71741	6.29376	5.49945	5.45703
Elob	243.256	287.666	248.014	229.48	244.006	192.208	171.874	162.591	200.175	146.022	179.271	149.194	173.391	205.655	163.25
Eloc	75.857	39.1274	66.9556	59.7223	35.8131	46.5075	32.0909	33.3785	33.1935	28.4946	30.2441	25.7943	32.0079	14.7218	26.1451
Elp1	10.7721	8.30364	7.76994	6.2263	4.54896	4.75268	3.49448	4.49272	4.23552	3.5715	3.1316	2.35333	2.45444	1.62975	1.5267
Emsy	4.41075	2.23829	4.08477	3.95451	1.89769	3.38223	2.82827	2.14999	1.84583	1.86783	1.7489	1.75354	1.31499	0	1.16824
Eno1b	25.3583	23.4887	16.0835	11.6437	15.8541	12.1851	13.0386	10.0596	12.9486	11.0674	14.3744	11.0679	12.4337	17.1752	7.82566
Entpd4b	2.4486	2.97189	2.05927	2.46036	2.4996	1.31094	2.60235	3.08121	3.44132	3.79438	3.57245	4.57201	3.14356	3.90095	2.99656
Entr1	21.6789	20.4264	21.2381	19.4918	16.3707	17.5668	15.0543	15.3114	15.4208	11.7185	14.4426	10.7539	15.8832	13.1068	14.0655
Epb41	54.4812	72.8386	78.9068	70.0185	56.0625	52.3087	37.0829	30.1426	42.3046	20.2089	8.9556	9.2739	8.8317	7.3302	13.8739
Epb41l1	1.88796	2.49387	2.07623	2.8961	2.04551	1.52504	0	1.36866	1.32668	1.90344	1.1612	0	0	0	0
Epb41l2	3.386	3.07479	2.58394	1.4215	1.75956	3.20235	3.19433	2.17269	2.89125	2.21252	5.59322	4.75321	1.931	0	0
Epb41l3	3.29744	1.50507	2.30723	2.5181	1.52694	1.38341	1.42215	2.18621	1.77519	2.26985	1.77774	1.20928	0	0	0
Epb41l4b	2.41433	3.39341	3.00448	3.09405	4.83679	6.52639	10.9101	8.53667	10.048	14.267	13.2376	16.9451	15.3167	25.5949	21.0766
Epb41l5	3.16509	3.46324	4.08655	5.42809	4.50865	6.54783	5.732	7.78848	6.74918	7.97392	8.78326	9.39854	7.69287	4.63212	4.48018
Epb42	58.067	47.1748	79.1384	93.7262	54.6188	45.5932	24.4506	13.6617	22.1321	7.60976	7.9968	0	0	0	0
Epop	5.41224	4.31949	2.39929	1.29047	1.856	1.62798	1.86723	7.10732	2.49928	2.23805	2.57373	2.62613	7.11121	1.4793	1.34994
Erbin	7.22945	2.50261	6.20423	6.82934	3.10966	5.69626	5.30546	9.1952	5.88202	7.71157	6.2447	7.85926	5.72832	2.01914	5.05217
Erfe	4.61145	4.04023	2.50038	2.44024	3.58733	2.72371	1.53768	0	3.20415	0	0	0	0	0	0
Erg28	33.6069	31.9086	30.2548	32.374	31.5899	35.4054	39.5949	27.1483	32.1913	34.5328	41.0773	48.4447	81.4944	31.7142	33.8709
Ess2	7.93111	9.4124	6.15104	5.98306	5.83864	4.12721	4.18508	4.62398	3.82171	3.68719	3.10159	3.21895	2.73138	2.90701	2.03236
Etfbkmt	3.36137	2.4716	4.09797	4.20867	3.74177	4.75566	3.67468	3.14561	3.13522	2.8716	1.39686	6.41567	6.92774	18.9932	30.0314
Etfrf1	4.39489	2.83397	4.46557	5.79416	4.25259	8.14356	10.8692	10.3561	9.11094	11.1309	10.2061	14.969	16.2659	8.36053	9.76402
Evi2	3.05591	2.29367	3.06442	3.81461	2.98183	4.47587	4.37726	4.18197	3.36428	3.72388	2.91173	1.33065	0	0	0
Faap100	6.29267	7.3756	4.18761	4.20084	4.87328	3.51935	3.84752	3.54821	3.67493	3.2681	2.86748	3.30277	4.12775	2.52744	1.84355
Faap20	15.6829	16.887	14.4093	9.49132	12.0522	10.7961	12.4334	12.1065	11.973	10.3414	10.2089	12.7005	9.45791	12.2749	9.5589
Faap24	15.0511	18.3714	14.4481	12.517	11.2404	6.8588	6.22024	5.17948	6.30302	2.23306	2.89468	1.37905	1.79788	1.74644	1.8146
Fam204a	7.65742	4.9604	6.45125	6.5265	4.52674	3.86241	3.06365	3.71461	3.36837	3.3144	3.85636	3.12447	2.90187	0	2.40918
Fam234a	7.12294	10.3379	7.42283	9.08916	12.6425	10.414	12.1469	16.659	15.5924	20.6614	17.8468	17.7255	15.5963	25.2933	16.1338
Fam234b	20.5474	21.2316	21.4873	20.4298	20.106	15.2322	10.8517	6.73383	10.4918	6.26834	7.21868	7.29876	12.8054	5.92849	5.4538
Fam241a	45.5073	45.9065	58.159	54.2473	50.1666	42.19	24.3196	17.0002	16.8762	7.29587	6.61017	3.41448	2.39064	1.81811	2.50696
Fam8a1	8.82988	6.7895	8.6501	8.93735	6.71111	8.64864	7.12663	7.94922	9.03964	10.82	10.3677	12.9947	11.0774	7.93289	11.7477
Fam91a1	9.8049	6.00073	7.35292	8.14565	6.7584	6.84233	6.94112	8.61605	8.23463	9.09346	6.94969	11.1063	9.22546	5.63072	6.50101
Fbh1	10.5511	10.2019	7.92495	7.34635	7.05978	6.21949	6.51514	7.5543	8.30578	7.96098	6.0029	6.10956	5.56647	4.41604	4.13149
Fcmr	0	0	0	0	0	0	0	0	2.02639	1.1909	0	1.01676	0	0	0
Fcsk	4.3559	3.65683	2.76323	2.73717	3.42323	2.54715	2.13031	2.53067	2.84789	2.9359	3.10708	2.32897	2.80081	4.18166	3.16144
Fdx2	29.773	34.603	24.6467	21.0264	20.3608	17.6817	15.8375	19.8425	16.7894	11.7813	16.7788	13.8431	17.2993	25.02	16.9427
Flvcr1	3.73779	3.10552	3.06781	2.61038	1.95808	2.24873	1.67176	2.23555	1.67882	1.58885	1.6502	1.33381	0	0	0
Flvcr2	1.32788	2.45428	2.61725	3.86512	4.48791	3.19166	3.09871	4.18342	6.3197	9.59559	7.16289	8.69336	2.09569	0	0
Fmc1	48.3903	55.2696	51.5815	43.2398	51.3478	41.3671	45.4723	40.6484	48.9275	40.3161	52.7878	55.5419	71.171	74.4244	53.0258
Fndc10	1.04958	1.17789	0	0	0	0	0	1.13228	0	1.09191	1.69354	0	1.2028	0	0
Frg2f1	0	0	0	0	0	1.35004	1.26367	1.31377	1.24771	0	1.46243	2.28339	2.18881	0	1.29573
Ftl1-ps1	111.875	164.263	107.411	92.9356	116.185	97.1352	83.0802	82.6316	86.701	79.5083	94.8253	67.0621	143.719	178.245	104.633
Fyb2	0	0	0	0	0	0	0	0	1.04256	1.54477	1.46364	0	1.72125	1.47471	2.2079
Garem1	6.40628	5.75365	7.3933	6.33851	4.41173	3.22908	3.51038	3.78619	4.43767	3.24927	2.87905	4.85179	3.8695	3.29666	6.49425
Gask1a	0	0	0	0	0	0	0	0	0	0	0	0	0	1.89954	0
Gask1b	1.10629	0	0	0	0	0	0	0	0	0	0	0	0	0	0
Gatb	4.79528	5.43422	5.20402	5.21641	4.20712	3.12713	3.5145	3.32838	6.53965	6.52347	7.49025	7.39354	8.03003	6.4184	6.02514
Gatd1	10.2526	11.9372	9.85793	8.80664	9.5052	7.27146	7.10539	9.96205	10.4828	9.09526	7.39749	10.6524	5.19875	6.548	4.3132
Gatd3a	26.7954	30.3382	27.295	24.4426	29.1235	28.1143	31.1195	24.704	31.4044	35.1547	40.8011	42.3784	59.5038	60.1276	40.3117
Gbp2b	0	0	0	0	0	0	0	0	0	1.0856	0	0	0	0	0
Gcn1	20.2103	24.124	15.2828	13.284	14.4112	10.7945	9.14263	9.00863	10.6133	8.67306	7.84242	5.69026	6.62779	4.53183	5.28356
Gimd1	4.6893	2.1289	2.93758	2.32776	0	2.0109	1.99999	1.68872	3.40601	4.3617	3.56813	1.42227	2.98598	1.0278	2.54279
Gk	1.95724	1.3414	2.10799	4.03127	4.23441	10.4841	9.75894	21.8074	17.5184	26.4	23.2792	44.6933	19.6366	5.14461	7.22546
Glmp	9.65914	11.9587	16.1367	8.86826	11.5271	14.7976	17.1054	10.5391	21.7168	16.6706	9.52184	12.4453	20.4039	18.1478	13.4953
Gm16867	15.191	19.5379	17.8658	8.49585	1.40223	9.11982	14.4074	1.03983	3.40691	1.07515	0	0	0	0	0
Dpcd	11.3689	13.1439	10.8985	7.50561	6.49327	5.85266	6.08723	6.48653	6.06619	5.81676	6.64202	5.5515	6.12552	6.80931	6.81062
Gm28036	20.648	17.9074	17.9772	15.6747	11.9369	11.4741	9.876	9.0554	10.6506	10.3545	9.41802	7.78688	6.00268	4.82318	5.01932
Gm28038	10.0789	9.70026	8.0683	9.46224	9.01214	10.2666	12.7019	8.85388	10.2718	13.7204	17.1911	15.8056	16.8025	17.3187	13.3548
Gm28044	0	0	1.17388	0	0	0	0	0	0	0	0	0	0	0	0
Gm28048	12.8702	15.0108	12.4755	12.2381	14.5658	12.5485	14.011	13.224	14.237	13.3591	13.1475	11.9891	9.47986	8.67751	6.78253
Gm28051	15.5037	12.9546	15.3668	10.3508	10.0178	9.36359	7.70666	5.30815	6.56919	6.69809	7.15752	5.86911	3.37554	2.94429	2.8258
Gm28053	3.38535	2.1394	1.55064	1.71109	2.27277	2.48823	1.71192	1.65024	2.25534	2.51329	2.0019	1.09718	1.20407	0	0
Gm29394	13.9544	16.2679	10.9442	8.90183	6.52453	6.97478	5.82034	13.3749	10.3694	9.35264	10.9666	9.28738	10.462	10.4634	10.5233
Gm38393	7.90981	6.71956	4.96152	3.04682	2.15282	1.45915	1.97074	2.702	3.31226	4.51254	5.27046	4.60822	5.05907	7.07298	4.82757
Zbed6	13.0393	8.07694	12.4694	13.7754	7.66477	13.9197	11.9509	10.7821	10.894	10.2703	10.2235	12.4409	7.68994	3.81669	7.14389
Gm42688	11.7735	13.4476	11.395	9.91434	9.46567	8.59564	7.64841	7.09676	7.86598	6.83592	8.33854	6.36607	8.25976	8.0589	8.15011
Gm43302	0	0	0	0	0	1.3527	3.45538	4.96656	4.87864	7.4089	5.86378	6.07951	1.12753	1.96026	3.72854
Gm44503	3.60081	2.51412	3.24998	3.35537	2.5253	2.94417	4.8124	4.28655	3.07796	4.44122	2.97501	6.75798	5.47346	5.2854	8.07335
Gm45713	3.86455	5.62952	5.02157	3.35927	2.36122	2.25746	2.43449	1.70033	2.85661	1.96322	1.86382	2.3258	2.48558	2.80993	3.23189
Gm45753	1.24557	1.74517	5.49718	11.0238	13.2776	22.0119	31.3776	28.2476	25.9614	37.8077	29.7341	37.8628	34.3303	33.522	24.4747
Gm45837	6.47331	5.99087	4.31313	6.27683	10.8016	13.048	13.1794	14.3266	10.3222	13.523	10.2125	8.07111	6.07994	3.97468	2.23437
Gm49322	21.3711	27.428	17.3368	16.7675	17.1324	11.8784	10.9687	10.5742	9.17446	8.26579	8.07026	6.99346	7.02743	9.47745	8.33915
Gm49339	0	0	0	1.44768	0	1.86412	2.66275	3.77157	2.43583	2.63409	2.37042	2.23798	3.83093	0	2.23644
Gm49340	0	0	0	0	0	0	0	1.27367	1.07064	1.25214	1.26725	2.67634	1.57913	0	1.28833
Gm49342	40.5903	36.7614	51.7697	49.4484	40.528	49.588	61.3606	27.4836	39.8245	34.0386	39.3543	34.1385	50.9759	38.9771	57.207
Gm49405	9.40769	6.1969	9.52582	3.25789	3.54045	3.92195	9.99465	14.4414	5.22192	4.09592	4.96446	3.77331	17.1182	9.42838	12.9831
Gon7	11.274	11.5187	12.8635	10.7975	9.68681	9.51603	7.02039	5.96345	7.00676	6.97202	6.4304	7.195	3.91869	3.06696	3.18641
Gpat3	0	0	1.15406	1.97404	2.19722	3.2852	3.16407	5.89468	6.58503	4.92889	6.4184	7.3937	1.66819	0	0
Gpat4	21.831	26.5211	19.7061	18.524	18.9603	15.1199	13.8243	29.3897	18.6707	22.1223	16.9916	27.4251	23.6767	31.3269	23.6087
Grk2	27.1419	33.2692	23.5466	25.3615	31.6676	24.9056	28.0006	33.5629	25.9704	21.0056	18.4026	10.9229	10.5881	9.57196	9.41414
Grk3	1.49981	0	1.63262	2.42897	2.23053	3.53788	3.56795	2.22105	3.04746	3.17279	3.44395	4.39562	2.18647	0	0
Gsdme	0	0	0	0	1.31923	1.43571	1.37923	1.92068	1.60598	2.36956	2.7193	1.6553	1.8587	0	0
Gstp3	16.4121	24.0772	38.8131	54.2064	109.843	106.232	126.739	37.3079	102.097	95.8469	129.196	76.0652	15.6623	21.2062	12.2029
Gucy1a1	4.08532	2.37378	2.86829	2.63598	1.88826	1.73804	2.69069	4.23189	4.19511	6.24043	5.15704	4.31584	2.91624	0	0
Gucy1b1	4.53913	2.38742	3.27761	2.519	1.94934	2.54372	2.46746	3.15308	3.38004	4.58636	3.50597	3.20282	1.86035	0	0
Hacd1	25.2321	28.13	24.153	22.0923	24.5672	21.797	19.4227	18.5629	18.0701	15.0324	14.7501	8.1995	11.3381	9.09484	5.81721
Hacd2	7.89131	7.9753	9.46706	10.123	9.77286	10.888	11.745	11.3921	18.6237	19.2855	18.5331	21.5392	20.2691	12.9679	14.9131
Hacd3	26.6224	21.2381	25.2054	27.4649	24.4988	33.729	42.6854	53.2793	47.0331	59.4486	56.9584	75.067	51.9572	30.8022	33.1863
Hacd4	1.56374	1.48589	1.88889	1.67262	1.95162	1.66145	1.61794	1.7701	1.16903	1.66013	1.21979	0	0	0	0
Haspin	7.37531	7.07175	6.87834	5.67336	4.80659	3.78761	1.93737	2.47166	2.55769	1.6821	2.07979	0	0	0	0
Hdgfl2	43.026	42.7878	32.8048	28.6933	26.8459	19.7811	18.2953	20.0873	19.9016	16.3379	18.7569	13.2807	19.0178	16.374	14.1485
Hdgfl3	1.10361	0	0	0	0	0	0	0	0	0	0	0	0	0	0
Hdhd5	7.63053	8.35453	6.61685	5.99127	6.35986	5.13538	5.35068	4.75218	6.99548	6.99192	7.87041	7.325	11.2163	10.7153	9.10822
Hectd4	13.4505	13.4914	18.908	16.5834	15.1842	11.2934	8.67395	5.66091	6.2134	2.86979	2.23471	1.0804	1.21273	1.06412	1.13427
Hgh1	17.3318	19.774	11.6577	9.73523	8.71138	6.90397	6.64896	8.81	4.62595	3.50354	3.70182	2.03305	4.07645	3.65716	2.72765
Hikeshi	12.8626	15.9843	11.8222	9.81162	6.99423	6.63925	5.65708	3.79094	5.14363	5.88589	6.16613	5.56975	6.11025	6.92057	5.72658
Hist2h2aa1	2.21752	3.18007	0	0	0	0	1.03574	0	3.52638	0	0	3.59106	0	40.9656	0
Hist2h2aa2	5.30129	16.7233	7.52595	19.7904	28.4785	28.6101	23.9493	42.6773	40.5926	29.9673	25.8491	16.5187	48.2057	145.831	88.292
Hjv	1.31153	2.75717	4.2006	11.64	17.8812	27.9443	43.4342	24.139	23.7502	26.6818	28.5645	26.6856	55.416	42.6643	32.6421
Hmga1b	66.1796	87.2319	45.562	32.8125	30.91	16.0669	15.0073	16.1054	9.90959	8.00126	7.67375	4.63358	4.459	2.76243	1.99409
Hpf1	51.4008	26.018	45.741	42.7168	21.1092	25.5199	18.1471	11.7278	17.5003	10.5167	11.999	5.23728	7.12791	2.53736	2.96553
Ice1	5.48078	3.82611	4.59485	3.97647	2.67664	2.65659	2.71773	3.60982	2.72547	2.42387	2.58436	2.13069	1.94607	0	1.27348
Ice2	2.89399	1.47753	2.93636	2.16515	1.2882	1.18309	1.11107	2.10328	1.45987	1.72424	1.78821	1.40883	1.63221	0	1.01275
Ifi206	0	0	0	0	0	0	1.7008	0	1.01361	0	0	1.36161	0	0	0
Ifi207	0	0	0	1.32598	0	1.25066	2.47939	2.31806	2.14971	1.93083	1.39356	2.2088	1.89907	0	1.57375
Ifi209	0	0	0	0	0	0	2.65182	2.35918	2.01433	1.86461	1.12902	1.24954	0	0	0
Ifi211	0	0	0	1.1535	0	1.2083	5.83651	3.62052	2.71356	2.8571	1.96538	2.8254	1.37037	0	1.2336
Ifit3b	0	0	0	0	0	0	3.76611	2.42831	2.01317	2.08329	1.57829	2.85238	1.25155	1.34005	1.96064
Ift22	4.42226	6.13884	3.1693	3.79345	3.5206	3.47354	3.78266	4.18823	5.6287	4.96621	4.2286	4.23631	4.01823	5.03272	3.42861
Ilrun	40.8402	54.3017	43.8963	41.3939	45.7436	38.8332	35.1529	39.8691	38.062	33.0434	31.145	39.4814	46.6689	62.3339	48.3884
Inafm1	12.257	13.3859	11.1968	11.8296	12.5216	10.4958	9.63113	14.8992	8.61144	7.67087	6.74026	9.93028	6.83336	3.39123	3.45795
Inka1	31.1642	32.168	28.8579	23.468	24.6591	14.0356	11.2574	14.5683	9.36945	4.2784	4.80271	1.68025	1.07994	0	0
Ints11	21.1554	25.9621	19.5084	16.1907	17.7861	12.3916	10.3579	8.22905	10.8537	10.0933	10.2299	8.33402	8.59073	9.5529	7.7118
Ints13	23.2064	15.1385	16.5592	15.158	10.7185	10.4282	9.41387	6.76983	9.14593	5.34466	7.39546	4.27554	4.99606	2.28821	4.17972
Ints14	18.487	17.57	14.8166	12.1419	10.9796	7.14693	6.52751	5.70505	6.17534	6.01721	5.22046	3.18858	3.39916	4.26256	2.86227
Ints6l	20.7202	11.3656	24.8366	21.6668	13.8368	18.2026	8.78042	8.28188	6.06683	5.083	4.9089	2.99343	1.83025	0	0
Itprid2	4.30977	2.96577	3.57525	4.2267	3.84777	4.52396	4.30706	5.83639	6.27763	7.49246	5.85496	6.3	5.35727	4.13309	5.02408
Jade1	3.20573	3.41988	4.82756	4.43635	3.01639	3.12949	1.66967	3.21919	3.49581	4.02578	3.38498	4.20447	3.20821	1.24103	1.89583
Jade2	0	0	0	0	0	0	0	0	1.4785	1.39965	0	0	0	0	1.33584
Jade3	5.90681	3.88536	4.80919	4.71085	2.1789	2.70717	1.32086	1.63945	1.46503	1.20809	0	0	0	0	0
Jcad	4.44223	4.79609	4.52516	4.06156	4.31051	4.24179	4.19935	4.22854	4.77595	5.57227	3.56768	3.31441	1.92903	0	0
Jpt1	112.369	146.442	111.711	99.821	85.8307	68.39	51.3549	44.39	43.3413	28.7672	33.388	22.3795	13.8281	14.3879	10.5386
Jpt2	39.2869	40.8358	32.2744	29.865	25.4512	19.8229	13.7359	12.0258	20.014	17.3224	16.4518	8.27042	11.8431	10.2051	11.0903
Kat14	12.4947	13.5617	12.1214	8.88107	7.87569	7.17581	5.30348	7.35321	6.20966	7.79748	5.73933	4.0772	4.56922	5.91253	3.69474
Kbtbd6	1.90067	1.53706	2.27105	2.06081	1.76849	1.03541	0	0	0	0	0	0	0	0	0
Kctd12	4.97498	3.43364	4.11689	5.01036	4.96908	4.18346	2.97264	5.22607	5.94121	8.32747	3.28693	2.32729	1.2732	0	0
Kdf1	0	0	0	0	1.82969	1.80724	2.68165	1.84184	2.34308	2.86846	2.3133	2.52757	2.55156	3.63665	2.99565
Kdm7a	5.94755	3.48367	8.01099	9.43189	4.76835	6.67761	3.85257	2.91133	3.10246	1.79246	1.61125	1.48945	1.17128	0	0
Khdc4	14.2759	9.98763	13.3786	13.193	9.12605	9.87938	9.95505	12.9551	10.5569	9.21616	11.1036	12.0673	8.32597	3.80225	8.34745
Kif1bp	10.7933	9.81508	10.6511	8.58425	6.91324	6.21717	5.24823	4.91779	4.68019	4.10228	4.20404	4.2764	3.33504	5.26975	4.95177
Kiz	4.8621	2.75344	5.66964	5.12522	3.79593	3.44013	4.3461	4.61769	3.04594	3.64057	3.26218	6.23819	3.65959	2.47039	3.51347
Kmt5a	50.764	71.578	54.5219	77.7274	62.3062	48.9792	34.0875	32.5485	30.7378	26.9913	26.0577	15.7184	18.229	11.9959	14.2896
Kmt5b	3.39911	2.46017	2.46772	4.953	2.40795	4.43796	2.23301	2.39227	2.49717	4.69472	4.95127	6.22782	2.11009	2.9957	4.7795
Kmt5c	73.8005	80.9753	74.2831	72.4642	60.1031	44.8155	35.2519	34.2522	24.2714	16.8488	14.6944	9.17089	12.1057	9.37672	4.95618
Knl1	5.43504	1.78482	6.3788	6.84324	2.03452	3.40207	1.90243	1.51798	1.80604	1.05103	1.06599	0	0	0	0
Kyat1	7.37284	8.15647	7.59734	8.12396	8.11078	11.5575	17.3265	18.2218	21.4324	21.363	22.0236	10.8217	23.9564	70.9745	46.0207
Kyat3	4.06153	4.38144	3.87569	5.33105	4.8793	7.65535	25.4285	100.525	83.3339	104.833	118.087	62.6129	37.2648	19.3099	22.9894
Large1	1.89936	1.21788	0	0	1.00572	1.1272	1.50981	1.19111	1.08832	1.36201	0	0	1.07624	0	0
Large2	0	2.11968	1.55368	2.18367	3.29759	3.95887	2.32712	3.94383	1.4571	2.20413	1.52629	1.71997	0	0	0
Ldah	10.5029	9.42519	8.36947	7.59542	5.6798	5.31267	5.53454	5.39401	5.18206	5.79655	5.22998	6.80457	7.68216	9.11628	10.9217
Lins1	1.9197	1.87589	1.09827	1.45427	0	0	1.59711	1.78741	1.1963	1.16581	1.81179	0	0	0	1.01812
Lipo3	1.16894	0	0	1.22273	0	0	0	0	0	1.30421	1.63623	1.35853	0	0	0
Lmntd2	1.32634	0	1.15882	1.21769	1.25561	1.54512	1.01244	0	1.1042	0	1.18217	1.11565	0	0	1.19145
Lnpk	7.86376	2.55017	6.32153	6.12466	2.75946	3.00055	2.71555	2.31084	2.31937	1.12325	1.15783	0	0	0	0
Lratd1	0	0	0	0	0	0	0	1.83147	1.75649	2.0239	2.10336	1.77522	1.19385	0	0
Lratd2	2.60374	2.13524	1.7022	2.32272	1.65429	1.92835	3.65346	4.4064	5.22684	5.89941	5.39907	4.37545	2.61994	0	0
Lrrc75a	2.46849	2.23358	1.82372	1.31978	1.61162	2.0105	1.4772	1.54489	1.86946	1.88821	1.63952	0	0	0	1.86436
Lsm8	43.6054	36.9597	37.2046	34.1904	22.8161	25.6885	18.4599	21.2067	18.4985	13.592	13.9625	12.8198	9.39209	4.71754	5.63459
LTO1	14.8773	13.5549	9.25818	10.1805	8.4333	8.21697	7.17493	7.03381	8.77889	11.0249	8.67341	9.33693	10.3605	5.32613	5.13005
Ly6g2	1.12962	0	1.97701	3.61135	3.73585	6.19535	15.1701	13.2985	25.7745	42.3002	44.7713	60.8829	75.7954	63.3199	52.9851
Mab21l4	0	0	0	0	0	0	1.26251	0	0	0	0	0	0	0	0
Maco1	14.224	13.7929	13.3673	11.7868	10.924	7.85619	9.17606	9.57296	7.45102	8.12212	7.17306	7.80934	7.09905	6.65952	6.56459
Maip1	6.89489	6.08768	5.7638	5.774	5.05931	4.56455	3.71196	4.97594	5.3224	4.5001	5.36419	4.46776	4.25031	4.02483	3.96829
Map11	13.2238	11.1655	12.3044	10.8694	9.61249	9.15583	10.1415	8.19207	6.01465	5.64764	5.69819	4.10862	3.96775	3.61728	5.0609
Map3k20	2.17054	3.21983	4.32896	4.87181	2.60666	3.49752	2.06055	2.19629	2.75521	1.75192	0	1.16748	0	0	0
Map3k21	0	0	0	0	0	0	0	1.15383	0	1.15402	0	1.57144	1.59851	0	0
Mcemp1	0	0	1.41507	3.94696	7.00031	11.1936	8.82786	8.2252	3.43058	4.26416	2.12628	0	0	0	0
Mcrip1	31.8948	39.6921	24.9696	24.6211	29.9328	25.8888	27.1967	41.3416	26.6184	24.6133	25.8899	28.2917	23.3144	18.4971	9.78973
Mcrip2	33.1756	49.7596	27.5886	23.5545	23.7526	24.5295	24.816	84.0155	39.4018	43.6651	52.6605	55.0589	59.7407	50.7144	26.4136
Mcub	3.25183	4.98188	6.57087	9.65342	7.83708	6.02405	3.6903	1.7046	1.09974	0	0	0	0	0	0
Meak7	2.88276	4.52233	2.8956	2.55461	3.32881	2.27798	3.04339	3.8129	2.77031	3.5072	3.40433	3.0971	2.81078	3.70249	2.52583
Mesd	18.626	15.7592	33.003	14.0216	8.8079	31.4826	21.6137	8.4306	9.54273	14.4061	9.37858	12.1662	6.69559	5.30032	4.56818
Mettl26	36.7386	45.0157	37.768	40.0302	38.9636	36.5521	42.9031	51.7146	72.5531	76.512	77.6164	100.452	82.5696	197.003	108.222
Mettl27	4.6688	6.48546	5.49608	5.8041	7.82019	9.63836	5.85556	5.60822	4.8051	2.78328	2.86308	7.32909	8.75519	4.00035	6.84796
Mfsd13a	11.5739	12.1012	10.3225	12.1788	16.1767	10.5531	6.24717	3.9645	3.22109	3.43076	3.24366	1.52833	3.67844	4.93756	3.08696
Mfsd14a	16.1935	12.7553	15.3701	14.2927	11.4279	12.9868	10.7841	11.4619	10.4063	11.8586	8.4615	10.7741	10.0084	6.13216	7.07568
Mfsd14b	15.796	13.5081	16.1093	15.9887	12.0374	10.3026	7.90375	7.63723	10.2219	11.5563	8.77415	9.06024	6.27012	4.46579	4.60138
Mfsd4a	1.06197	0	1.2578	0	1.01175	0	0	0	0	1.16403	0	0	0	0	0
Mfsd4b1	0	0	0	0	0	0	1.27554	1.85623	2.93301	3.58937	2.07926	2.45807	6.50446	11.9862	6.62498
Mfsd4b4	1.81276	1.24358	1.28227	1.56756	1.32163	1.13937	1.0469	1.79732	1.20774	1.23809	1.54589	1.62869	1.23883	0	0
Ctage5	22.5218	8.27737	14.8652	29.4972	11.0461	28.8836	24.9875	14.3243	16.7834	31.6631	20.6446	32.0137	27.1654	24.4844	24.3895
Micos10	24.0372	20.7442	19.0511	24.3926	11.8286	20.0364	41.7585	24.2096	37.9156	21.3106	30.0264	19.9289	22.7435	28.5294	20.6367
Micos13	74.532	83.4146	73.1183	65.3624	70.3023	57.1128	60.9234	85.6631	75.8675	62.8633	76.5556	79.2749	117.216	93.361	65.7767
Miga1	2.56737	1.24935	2.31699	2.18074	1.63748	1.76571	1.81447	1.85616	0	0	0	0	0	0	0
Miga2	6.94728	7.99093	5.41153	4.66794	3.58042	3.71874	3.79569	5.90318	8.3258	8.2092	11.4289	6.66575	9.45734	12.3821	8.02322
Mindy1	8.12828	11.8019	11.1026	9.49404	15.6525	9.82845	23.3631	20.0758	15.2068	22.7597	12.0056	11.0142	22.1817	30.6672	21.9819
Mindy2	5.78644	4.86273	7.763	9.04946	5.61004	6.30647	4.66254	3.25111	3.10082	1.97677	1.60301	1.57121	2.22072	0	0
Mindy3	10.5638	4.50441	8.00214	8.59955	5.38726	4.3464	3.75011	2.99421	2.6123	5.03805	4.02793	3.1516	6.67491	5.93659	6.98615
Mkrn2os	2.15949	4.69366	3.95136	5.27422	7.48901	8.73468	12.1669	6.63405	7.53656	9.97797	11.837	9.97284	14.6932	16.1557	14.7301
Mmut	10.1047	5.12671	10.4609	11.3819	6.82249	10.45	12.8512	14.9308	19.0464	24.5143	22.1291	23.0264	32.3776	11.9905	19.2898
Mosmo	3.3956	2.76645	3.61484	3.0973	2.54089	2.48044	2.25501	2.32663	2.22132	2.19066	2.30373	2.23895	2.2246	1.42735	2.02004
Mpig6b	6.55349	8.25216	4.23598	4.29878	6.73329	2.7333	3.19199	5.58219	3.10178	1.42987	1.02147	0	0	0	0
Mrm2	8.01584	11.4786	7.94743	5.91438	6.00898	3.67141	3.94825	5.04425	6.1339	6.3295	6.7617	4.81135	5.02636	7.31817	3.69633
Mrm3	10.4818	13.3165	10.3341	7.93952	6.07751	5.41034	4.77244	5.79312	5.25669	4.43926	4.95683	2.94617	3.72052	5.96016	3.61737
Mrnip	4.92903	3.56779	3.56273	3.57603	3.75751	2.76962	1.80358	2.16689	2.51307	2.94084	2.71239	3.85562	2.96462	3.55804	3.3637
Mrpl57	28.1395	33.868	24.7109	20.7087	22.8987	18.5928	16.2828	18.1575	14.4184	10.9524	14.3018	9.55893	16.548	18.9221	13.3354
Mrpl58	29.2601	29.3536	26.0351	23.9538	18.0829	17.4377	16.0283	18.6024	19.5547	20.0817	26.5762	15.5366	26.5852	19.1256	23.6919
Mrtfa	5.75415	6.63981	4.36765	4.53829	6.07899	4.99416	5.62887	5.02586	4.0635	5.01747	4.20758	1.58241	1.40664	2.40474	3.23842
Mrtfb	1.29504	0	0	1.71071	0	0	1.56802	0	0	2.55034	2.46954	0	0	0	0
Msmo1	34.0343	30.4528	26.7389	28.3863	22.054	37.855	26.2531	15.5116	12.8894	15.8753	20.7464	4.29768	192.373	27.828	77.6584
Mterf1a	2.39917	1.34328	2.82947	2.18518	0	1.69083	1.9537	1.71846	0	1.0681	1.03146	1.01082	0	0	0
Mterf1b	1.86627	0	1.71499	1.29904	0	1.10083	1.16497	0	0	0	0	0	0	0	0
Mterf2	2.30887	1.31571	2.11102	2.28001	0	1.00975	1.26613	1.19457	1.20389	1.68502	1.56938	1.3112	2.04369	0	0
Mterf3	6.99757	4.17213	7.12816	5.73921	3.81969	4.29828	2.82498	4.65174	3.49969	5.32267	3.82078	2.95918	4.76097	3.05728	5.75221
Mterf4	6.89791	5.15081	6.47711	5.58273	3.62916	4.79718	6.17085	5.72879	6.05087	4.4315	5.613	6.62301	6.68679	5.08015	4.10555
Mthfsl	9.10387	7.5783	9.4515	10.7785	10.2952	11.3114	16.6958	17.1695	14.4635	21.0702	20.6701	28.2664	21.1574	12.7337	15.708
Mtrex	28.4608	15.1485	20.8475	19.4061	10.695	11.5977	7.21123	6.78016	8.44822	6.70599	5.58504	4.42032	4.08227	2.15847	4.46467
Mtss2	7.2226	6.10561	2.96094	3.21997	4.34478	2.3536	2.53563	3.16018	2.77136	3.15456	2.81989	2.39852	0	0	0
Mydgf	35.8339	42.4392	30.5171	26.7541	35.3476	31.6357	29.9949	29.5584	36.7419	30.1057	34.71	28.1203	36.7226	47.8337	38.0388
Myorg	0	0	0	1.19659	1.73158	3.05819	2.68478	1.69709	3.10568	6.33381	7.10078	7.24672	6.70562	9.23677	7.0839
Naa38	44.2316	53.3073	42.0798	37.7576	38.023	31.4506	31.049	28.333	33.4557	29.4739	34.8259	35.1373	34.1292	42.6732	32.7247
Naa80	10.6541	13.0441	11.1845	10.4118	12.1732	9.99708	11.2197	11.3682	10.3077	12.1237	10.3035	19.2137	26.4809	26.0442	32.8283
Naprt	16.3767	27.2212	25.4167	29.3481	36.028	25.7802	21.587	34.239	33.9782	39.8123	49.7354	62.9318	72.7743	86.8499	73.415
Nat8f1	2.17717	3.12584	2.95681	6.42806	10.4177	24.1482	49.5136	9.90959	20.5963	23.2249	27.9601	30.6789	118.214	251.909	110.237
Nat8f2	0	0	0	0	0	0	0	1.44705	3.49107	3.96527	9.21229	6.21485	79.3805	222.65	298.688
Nat8f4	0	0	0	0	0	1.68737	2.32189	1.71375	1.52858	2.03064	1.31639	1.73314	5.22426	2.84738	3.7655
Nat8f5	0	0	0	0	0	0	0	0	0	0	0	0	0	33.0957	20.95
Nat8f6	0	0	0	0	0	0	0	0	0	0	0	0	0	3.22692	1.8945
Nat8f7	0	0	0	0	0	0	0	0	0	0	0	0	0	2.11098	0
Natd1	8.65239	10.8147	11.1178	10.2503	10.1181	6.15991	3.69669	3.3405	5.231	3.58095	2.83218	2.04819	1.33705	1.69653	0
Naxd	15.1606	14.4641	14.4912	15.681	17.5013	14.0567	19.4061	21.7644	22.6197	23.6746	24.4313	27.4703	31.1814	33.0111	19.4803
Naxe	46.3276	65.4595	44.1916	50.9888	73.2713	63.1322	55.6409	50.414	67.4022	77.4712	85.977	75.2486	64.9739	79.5252	47.0946
Ncbp3	15.4517	11.7033	14.37	11.6123	9.3991	7.82451	5.48043	6.85332	6.19619	5.4509	4.18011	2.87266	3.28146	2.5813	2.41766
Ndufaf8	18.847	26.6849	18.7379	16.4352	17.4686	17.3794	12.422	17.6736	18.2874	16.6454	17.4167	14.1018	22.4976	23.8901	15.1142
Nectin1	2.54758	3.26409	2.63479	3.44646	4.74205	3.89908	5.3522	6.44617	7.39516	10.4795	13.1122	13.0923	10.5158	13.5794	8.44611
Nectin2	16.7053	17.8831	10.1627	10.1869	11.5049	11.4411	20.4787	27.0675	18.1477	21.4982	19.3816	22.7725	16.7706	39.7272	20.4262
Nectin3	2.8159	1.5421	3.12777	3.3697	2.2567	2.56	4.44565	8.6899	10.6845	16.728	15.1108	13.132	12.5124	5.54405	6.65817
Nemp1	4.58659	4.12758	4.81529	5.33288	3.97238	5.08825	2.99053	3.78642	3.99076	4.32059	3.32724	4.49259	4.41693	2.93276	2.04852
Nemp2	1.83991	1.46702	1.59854	1.36901	1.12238	1.04391	1.34077	1.34943	1.5745	1.22924	1.09074	0	0	0	0
Nepro	4.55413	3.54863	3.05329	2.72734	1.85311	2.06384	1.55788	2.40685	1.74838	1.62782	0	1.96362	0	0	0
Nifk	36.0421	22.0731	28.4084	25.678	12.7499	16.8371	16.5347	18.5559	12.3695	11.2973	10.672	8.67743	11.3565	7.42704	8.92318
Nipsnap2	14.6257	10.9545	13.2806	12.1771	12.63	11.7204	10.1723	15.7277	8.91489	10.2351	7.00702	8.71363	6.74956	3.7306	4.00821
Nkapd1	6.22471	2.70484	3.92138	4.06409	2.57874	3.97119	3.4838	3.86519	3.37811	3.52129	3.00817	3.8592	2.08212	1.05372	2.22147
Noct	23.5795	17.3732	18.9978	21.0172	18.3449	12.0311	6.40662	6.40465	9.18711	4.75294	6.32616	1.21678	5.66752	0	3.95492
Nol4l	5.13999	4.42971	3.61174	3.14031	1.86981	1.30075	1.12479	1.71512	0	0	0	0	0	0	0
Nop53	127.804	170.41	109.719	97.6093	107.367	76.0758	73.7885	101.044	59.6734	54.0373	50.2421	61.4151	61.8938	74.6831	48.733
Nsd2	20.7366	14.4304	20.1953	17.4323	12.2411	9.81849	6.64645	6.02001	7.71983	5.84378	5.03991	1.99153	2.23393	1.06991	0
Nsd3	12.5476	9.88373	13.7871	12.045	10.2154	12.1016	8.61233	7.72789	8.1921	6.01237	6.85294	6.50731	7.94911	8.38248	7.18409
Nsmce3	5.00927	5.41631	5.32426	4.39432	4.23101	4.22364	3.34786	3.88687	3.19657	3.19243	3.56568	4.56309	3.23402	3.51621	3.10642
Nsrp1	8.08764	3.43847	8.14454	7.4696	2.21051	6.425	6.09684	6.99292	4.35556	4.61954	9.16838	6.65502	4.59625	1.24926	4.07388
Odr4	5.23814	1.51807	5.6797	5.32749	2.0603	6.09846	3.88936	3.97129	4.16363	4.67747	5.69739	5.64763	6.62388	1.69368	7.1865
Oga	21.0116	13.9885	20.1463	19.3315	14.2724	14.3165	14.0462	11.9726	12.128	11.1484	8.851	10.4789	7.82899	4.78496	7.16874
Otulin	21.3231	22.1637	22.795	18.1993	16.0017	14.9828	13.0868	18.4194	16.9739	15.4232	15.8699	16.8239	19.0269	26.8016	27.8493
Otulinl	1.95312	2.12672	2.41626	2.69975	2.63114	2.64508	3.02325	4.58747	2.92826	2.8431	2.25996	1.53944	0	0	0
P3h1	10.4444	11.7012	8.52455	8.44889	10.5392	8.91365	13.1938	9.58328	10.3125	10.38	10.1757	8.02337	6.4717	6.36688	6.35171
P3h2	1.68752	1.92999	1.90679	1.90982	1.84506	1.40791	1.05007	0	1.55222	1.72457	1.23607	0	0	0	0
P3h3	5.91731	3.99259	2.97858	2.73141	2.85487	1.91082	2.54106	2.55551	3.40029	4.20435	3.65433	3.08883	1.76697	0	1.32159
P3h4	6.34573	5.64479	2.33543	2.34375	2.70879	1.88013	1.93606	4.92834	2.74722	2.44258	2.60361	3.1914	1.18683	0	0
Pacc1	4.7716	4.41625	3.65701	3.78676	3.05612	2.79165	2.79577	2.32314	1.95445	1.88992	1.71664	0	1.07659	0	0
Akap2	0	0	0	0	0	1.17212	1.38624	0	1.14924	1.89283	1.33386	0	1.35362	0	0
Pakap	1.11519	0	0	0	0	0	1.20541	1.27926	1.95556	1.98742	1.79945	1.73528	1.19628	0	0
Patj	0	0	0	0	1.65958	0	1.19033	2.65483	1.32752	1.92477	0	1.74785	0	0	0
Paxx	3.96651	5.00043	4.00248	2.7959	3.74189	5.80448	5.9227	7.60259	5.79898	6.21992	8.05206	5.55387	13.1394	27.3637	10.156
Pbld1	1.23798	1.41585	3.64592	8.14025	31.3291	45.5844	51.0542	24.3255	32.5318	47.9658	56.8615	74.1952	71.5077	43.7449	36.9974
Pcdhgc4	8.41404	9.21827	4.12682	4.55832	6.19258	5.75804	5.70995	6.54989	6.60872	9.02838	8.1092	5.7043	4.16615	2.34455	1.80015
Pclaf	60.7594	41.3958	59.4696	57.3746	28.343	33.9291	19.4062	18.646	20.8238	13.5302	13.535	4.32967	3.47596	0	0
Pcnx3	23.71	21.5104	16.7128	11.5051	12.984	10.3667	9.45388	10.1986	7.89079	7.8863	7.4187	7.99508	7.3274	9.07574	6.23174
Pcnx4	1.91914	1.14295	1.45615	1.18914	0	0	1.20681	0	0	0	0	0	0	0	0
Peak1	2.06912	1.72225	1.67483	1.42034	1.40964	1.33894	1.52807	1.36008	1.71359	1.92593	1.45909	1.61211	1.04802	0	0
Pfdn6	105.523	130.974	98.6252	80.0371	80.5258	54.387	51.7619	46.2047	41.4109	34.1368	36.1956	32.0646	42.4179	57.2252	42.2399
Pgghg	6.29001	6.483	5.14549	5.39116	5.67324	5.4559	6.8625	6.63831	8.25848	10.2711	10.118	12.82	8.63281	9.41529	6.28562
Pgm1	28.8016	35.146	32.1816	50.1415	139.941	115.021	100.288	78.3769	75.1423	83.5788	85.3107	82.4515	85.1736	87.9895	59.4577
Pgm2	14.2204	12.8842	11.4514	9.44527	7.61556	5.21818	6.03454	5.01466	5.73583	5.57153	5.76758	3.81077	2.65816	1.35755	1.4105
Pheta1	3.91124	5.29525	3.91978	4.22565	4.72854	4.2035	4.3486	5.21857	2.81465	3.27107	3.21543	3.27576	5.06534	4.46227	2.86495
Pheta2	22.8083	26.8121	29.6048	25.0595	29.1085	13.8628	11.1272	7.68365	8.94318	2.48749	1.3491	0	0	0	0
Pidd1	13.6412	15.2596	12.876	10.6441	7.57714	7.22897	4.03374	4.37324	4.77783	2.64043	2.58512	1.01025	1.37944	0	0
Pimreg	20.9224	21.2459	14.3825	12.3247	10.4715	5.73682	3.87665	4.60868	4.70678	4.25096	3.6379	3.85193	0	0	0
Pip4p1	24.7031	20.708	18.6514	20.2745	18.4923	17.9548	19.1263	17.0201	13.6584	12.0699	12.5543	14.186	15.2604	14.8406	14.4112
Pip4p2	15.3058	11.2517	11.622	10.3504	6.81867	7.0452	5.73527	7.31744	7.96207	7.65645	6.96603	6.87125	4.61669	4.13297	3.7259
Plaat3	14.9434	15.5028	23.2311	22.3687	9.98982	13.3857	10.4471	6.67702	7.97769	5.8093	6.30384	5.70895	5.80835	2.53376	1.82714
Plet1	0	0	0	0	0	0	0	0	0	0	0	0	0	1.39049	0
Plpbp	9.76759	9.26464	9.12836	7.94195	6.91068	7.21067	6.66079	7.11039	7.44642	8.35652	8.87457	10.9163	13.7187	16.0065	11.1872
Plpp1	12.1036	16.8316	15.9319	17.9285	19.1212	19.7288	15.6342	23.5734	24.4979	24.9269	19.6638	17.3688	24.1478	6.92584	4.385
Plpp2	16.6708	24.7944	14.635	20.3555	25.674	21.5374	21.2746	24.656	26.1988	23.7726	24.2166	16.4487	16.0881	15.8645	10.6611
Plpp3	7.29018	6.21952	6.91802	7.35748	10.7192	13.9827	17.3537	26.0145	24.6539	40.3933	28.8163	39.3006	38.9839	21.3605	24.4291
Plpp5	18.0198	17.764	22.4204	19.7858	22.6561	29.7742	22.4163	21.9119	23.5468	23.4288	25.4456	22.178	8.32138	6.94593	8.54758
Plpp6	1.90481	2.17996	2.04764	2.76036	3.17836	3.33156	3.94193	5.05186	4.64903	4.67932	5.3674	5.06287	4.29427	4.05915	2.90207
Plpp7	1.56083	1.87935	0	1.04259	1.23587	0	0	0	0	0	0	0	0	0	0
Plppr1	0	0	0	0	0	0	0	1.32317	1.76691	2.28775	2.46405	0	1.05466	0	0
Plppr2	3.26135	3.41221	1.86284	2.6528	3.20435	5.12111	6.83399	2.77563	2.76721	2.69973	3.66255	3.26882	5.60747	2.16841	4.3169
Plppr3	4.98256	4.41362	3.57847	5.17798	4.71616	3.8742	3.50836	3.27067	1.60576	1.63884	1.56721	1.71506	0	0	0
Pnisr	19.6504	8.92912	18.3483	16.9103	7.21842	15.0309	14.0891	10.5179	10.6525	8.53599	10.0069	10.4965	7.29387	1.07178	7.0583
Poglut2	12.4748	8.33892	10.135	8.37305	5.1628	7.57967	6.6974	4.31982	5.24889	4.97163	4.77442	3.75934	3.63568	2.15681	2.94872
Poglut3	3.4689	2.07299	2.48236	2.73427	1.91198	2.42631	2.31451	1.53241	2.3069	3.21466	2.0123	2.05347	1.32394	1.1153	1.14879
Ppp4r3a	22.1349	12.4715	19.8727	19.183	9.97022	13.96	12.0391	12.1554	11.1309	10.3757	10.6771	9.30305	10.0091	5.97513	9.29399
Ppp4r3b	12.2553	3.51958	10.1486	13.2151	4.35013	8.27134	5.8402	6.2684	4.19885	4.84612	4.32741	3.82557	3.39547	0	3.67306
Prag1	2.72402	2.03111	2.081	1.73598	2.42052	1.90406	2.13299	1.48531	1.32657	0	0	0	0	0	0
Prelid3b	53.5775	40.5184	50.5481	43.5037	27.6719	29.6469	20.923	25.3229	28.7868	20.2196	25.9947	10.3971	16.6115	12.3153	15.3343
Primpol	4.60157	2.60011	4.26088	4.28062	2.22707	2.19231	2.0854	0	2.26837	2.29447	2.20509	1.81365	1.09928	0	0
Prmt9	6.45679	4.06475	5.42448	4.30108	2.93868	3.13957	2.1276	3.52365	3.15044	3.55837	3.52528	3.44046	3.44182	2.73053	2.43957
Prorp	4.70144	4.14375	3.90889	2.87827	2.32208	2.11861	1.70146	3.5731	1.78565	1.91861	1.74804	2.11902	2.79742	3.18522	1.80337
Proser3	3.32415	2.73114	2.47984	2.60674	1.92454	2.16813	1.87935	1.21342	1.081	1.18692	1.35684	1.5158	0	0	0
Prune1	7.89865	10.1189	7.9696	6.90718	7.37586	5.38028	4.31923	6.82873	7.44158	8.22603	7.37557	4.98934	3.08645	3.39714	2.78652
Prxl2a	33.8914	29.9448	48.2994	46.0754	37.2403	75.0639	73.3177	39.7991	41.4918	42.8487	38.6322	69.8732	36.9799	21.7327	23.6789
Prxl2b	6.36491	7.92581	7.06508	6.93542	6.22318	5.45041	5.25978	3.88678	5.75685	6.58516	7.19791	6.96457	13.9207	25.7147	14.0546
Prxl2c	6.9242	6.57598	6.04332	6.55131	4.9942	8.35758	10.8828	15.2227	7.81613	11.6808	9.38821	30.3779	15.8106	10.5019	11.8988
Ptpa	68.418	138.628	71.5248	82.4597	93.1927	70.9705	39.455	36.013	31.698	27.5093	20.5179	14.9199	15.9839	18.2627	10.8106
Pum3	24.0068	12.7107	16.7631	14.156	7.43146	9.76896	8.25206	14.2364	9.7751	8.55951	8.55982	6.25378	7.94205	3.97427	5.51239
Pwwp3a	18.1311	16.1779	9.07921	11.0936	9.52253	7.22104	4.76434	7.3677	5.09525	3.81333	5.37033	3.69707	3.55463	2.14845	2.05562
Pxylp1	0	0	0	1.16903	3.08359	1.69962	1.8815	2.16698	1.26482	1.87341	1.70815	0	1.00981	0	0
Pym1	21.9783	22.5348	14.164	15.5092	15.3993	10.1396	9.06098	15.9043	10.1473	9.95083	12.9649	10.8933	7.58032	9.79392	8.70406
Qtrt2	4.80889	2.37214	3.93932	3.29576	2.21862	2.37695	2.34623	2.78052	1.9532	1.90053	1.80514	2.69294	1.85403	0	1.43521
Rab1a	48.8564	30.4933	40.8752	41.2132	29.8768	28.5376	27.6002	38.5773	38.3698	42.4442	43.8774	44.6496	31.4711	22.0702	29.2489
Rab29	5.7133	8.34464	6.23402	6.62487	6.65999	5.16268	5.25045	6.74652	6.34591	7.20024	6.1038	6.5038	8.62805	11.5344	8.80945
Rab5if	120.25	140.405	100.32	81.6697	90.0606	70.9276	63.7454	80.0961	66.1765	38.4917	32.8929	45.7893	90.1097	82.5718	54.1559
Rab7b	0	0	0	0	0	0	0	1.14304	1.08805	0	1.17347	0	0	0	0
Rack1	798.657	1195.45	662.163	595.595	676.357	452.397	521.967	433.968	318.146	223.232	210.993	225.487	218.134	207.98	141.039
Ramac	24.9056	20.9829	23.7598	23.6282	12.8988	22.6903	19.9541	21.8677	21.1171	19.8982	15.6272	16.5536	21.348	13.6276	12.3447
Rbis	56.1655	34.5752	46.3623	44.38	29.9061	31.4808	24.7346	25.8044	29.5164	23.7062	27.0273	22.9646	30.9001	13.9128	19.0099
Rbsn	5.17261	3.76531	4.82907	4.16735	3.16596	2.94139	2.44652	2.24271	2.5224	3.02476	2.72337	1.84655	1.62215	1.24865	1.67052
Rcc1l	15.5203	18.0332	11.6923	9.77585	7.95648	7.37359	8.05568	11.4504	9.34779	9.41183	9.29897	8.06073	9.56637	10.2567	7.2881
Rdh16f1	0	0	0	0	0	0	0	15.8304	29.1209	42.3006	50.3772	89.7281	101.754	6.13001	5.31756
Rdh16f2	0	0	0	0	0	1.344	2.77358	4.70098	25.8064	29.157	34.8419	47.8575	79.6137	68.1504	44.3094
Rec114	11.7396	8.48688	11.4175	6.68126	8.3226	8.7442	6.19741	6.60593	3.23182	0	1.3979	0	0	2.58888	0
Relch	4.09677	2.39467	3.46314	3.07037	2.20607	2.53551	2.46719	2.97529	2.69163	2.82877	2.00706	2.82699	2.42437	1.21542	2.0324
Resf1	5.11857	1.07873	5.04763	6.09449	1.65498	5.1099	3.83641	3.15307	2.40234	2.07879	1.84615	1.34537	1.46042	0	1.65153
Retreg1	0	0	0	0	1.03072	1.86452	2.30677	2.33756	1.43732	3.11232	2.79593	2.05171	5.38888	1.38575	1.14214
Retreg2	49.7694	63.3596	52.2481	50.2165	56.1137	39.4402	36.6381	50.7957	47.0017	52.9025	43.5811	53.9665	52.3215	74.5335	45.1359
Retreg3	22.0522	24.8334	24.0767	23.2663	24.8033	22.1774	17.2119	17.9092	18.1106	17.3142	15.9268	19.9949	17.1043	26.8138	15.9688
Rex1bd	35.4638	49.7981	34.189	31.9177	28.6711	27.7469	22.8686	26.5083	24.2399	23.7897	23.9498	31.883	38.6139	49.9948	29.6345
Rexo5	3.08481	1.7383	2.94196	3.10032	1.93646	2.57082	2.04763	1.07007	1.49987	1.42738	1.89046	1.26982	0	0	0
Rflnb	2.01911	1.52198	1.8897	2.30765	5.02809	4.76367	4.3654	6.10102	3.27531	3.52989	2.49258	1.17469	0	0	0
Ric1	3.38971	2.83402	3.27917	2.96259	2.7938	3.27088	3.01521	6.47532	3.5469	4.21994	2.72869	5.06442	1.81699	1.09555	1.31067
Ric8a	14.5679	14.3869	9.53208	11.3029	10.9255	9.55327	8.43785	13.4665	7.97138	7.39755	5.66119	7.04395	7.10788	5.69526	5.62764
Rida	21.4031	12.0131	22.3708	38.3767	23.3148	78.4634	99.0403	120.908	76.6147	140.102	203.49	293.09	353.581	180.822	320.889
Riox1	15.7828	19.3153	11.1246	10.7814	9.19536	5.93426	5.61482	8.71914	4.89679	4.41999	3.96944	3.1823	2.7547	3.25745	1.9195
Riox2	13.0086	9.56169	9.01168	7.16529	4.76504	4.07269	4.58108	3.30323	4.34163	4.25466	4.48462	2.99255	3.69698	4.00702	2.92364
Ripor1	11.3096	12.9911	8.06175	7.49472	8.29863	6.82314	6.83034	8.38891	6.01657	5.94512	6.54637	5.02625	3.19058	3.27403	2.23443
Ripor2	1.20241	0	0	1.06704	1.06381	0	0	1.23325	0	0	0	0	0	0	0
Ripor3	4.71347	3.46543	2.10191	2.1837	2.78335	2.76325	2.45259	3.05536	2.35831	2.56524	1.44572	1.52448	1.47949	0	0
Rita1	4.95257	5.61229	3.66556	2.52363	4.00716	3.30627	2.5441	1.46347	1.60448	1.77021	1.66641	1.13754	1.56488	2.96004	1.82407
Rmc1	22.8703	18.1511	23.0598	28.3302	20.7857	19.9787	15.6466	10.1626	9.97504	6.89096	6.51976	6.53368	5.94793	5.4299	4.1073
Rp2	3.89751	1.58342	3.82111	3.76121	2.09735	2.53467	2.28308	2.4541	2.58736	2.5638	2.0684	2.72916	2.05341	0	1.29252
Rps27rt	82.9635	96.2407	65.7768	69.5443	66.7268	61.1047	59.7945	77.2848	44.9154	34.8873	26.4954	44.8394	34.1473	30.4029	29.2701
Rsrp1	81.8513	82.4741	89.1042	105.49	94.0253	165.051	164.321	68.1355	60.6315	67.8313	81.488	105.246	173.855	20.9478	124.479
Rtf2	36.0123	40.557	34.8217	29.3193	30.1863	29.7984	30.8164	39.3484	32.1592	34.8807	34.4416	50.3697	23.9329	30.798	24.1126
Rtl10	5.18331	4.50008	3.82843	3.35387	2.30865	2.00099	1.6453	1.83658	1.38275	1.7355	1.46111	0	0	0	0
Rtl3	1.05538	1.18916	1.14495	1.69391	5.74717	6.17586	0	0	0	0	0	0	0	0	0
Rtl5	1.22001	0	0	0	0	0	0	0	0	0	0	0	0	0	0
Rtl6	1.01183	1.10683	0	0	0	0	0	0	0	0	0	0	0	0	0
Rtl8a	6.23882	7.34272	4.98737	4.78996	5.04812	4.91891	6.70884	6.88069	8.07074	7.33616	9.70526	6.77681	9.5204	9.38994	4.9343
Rtl8b	8.39551	8.34816	5.21191	5.72791	5.76524	5.75104	9.19689	7.15507	8.25878	7.16342	9.75218	6.15558	8.79798	8.7605	5.82074
Rtl8c	3.15533	3.14975	2.24091	2.29494	3.50059	2.74162	3.43069	4.56515	4.55666	4.57576	4.79175	3.11026	3.12577	1.14104	1.07042
Rtraf	52.6414	50.8629	47.092	40.0879	29.3221	30.7051	29.172	47.0854	41.9545	39.0001	46.445	38.5752	40.8321	27.3603	27.2962
Rubcn	3.53427	4.2746	3.93698	3.53509	3.35485	3.14473	3.35989	3.60375	3.856	4.56428	3.69447	4.19606	3.48255	3.31063	2.41096
Rxylt1	3.0299	2.78352	2.98332	3.60359	1.58394	2.50817	3.06012	4.25656	3.17162	4.64905	2.88266	3.69605	2.897	2.10656	1.88197
Sap18b	52.5513	60.1463	52.9279	48.0058	40.8173	33.863	40.9278	35.5131	38.1019	33.6212	36.8694	28.6493	28.2608	29.7321	25.4801
Saraf	30.4402	30.394	26.7348	30.4007	37.2345	40.897	43.9788	38.0409	41.0496	43.5229	46.0833	43.2244	48.8519	72.9855	65.5845
Sdhaf3	1.08414	0	1.0817	1.11384	0	0	0	1.19811	0	1.09888	1.45038	1.25804	1.12855	1.20931	0
Sdhaf4	11.9162	8.6404	8.99605	8.49649	5.72846	9.02542	10.1828	9.57711	13.8322	7.90267	13.496	9.99243	15.1359	14.3007	14.2327
Selenoh	94.0676	115.401	78.0791	65.9776	52.9817	36.6244	29.4173	27.3354	34.5389	28.2753	32.9584	25.7337	19.2888	6.2134	4.19327
Selenoi	7.20151	5.51679	6.99886	5.81719	4.6969	3.99106	3.96077	4.49936	5.18448	6.3806	5.25679	6.40077	6.09037	5.13354	4.51848
Selenok	49.1905	40.3043	51.7758	53.9219	53.1003	115.006	154.342	49.2364	52.4313	42.4083	47.9046	58.1065	63.2792	57.6648	90.5977
Selenom	6.71037	8.06097	5.77067	5.40987	5.69443	5.47961	4.55927	5.17371	5.68825	4.23577	5.72313	4.07489	2.47609	2.09717	1.2731
Selenon	9.71238	10.3829	6.00572	5.65029	6.24628	4.37261	4.91664	3.52547	5.02715	4.56549	3.34628	2.46628	1.53417	0	0
Selenoo	5.77623	6.00949	4.66035	5.15014	7.51304	7.21875	7.75949	7.53322	10.2571	13.647	14.3156	13.8989	22.7142	27.2774	18.4706
Selenop	150.299	119.166	117.015	371.29	477.867	941.759	1314.98	1732.86	1639.69	1870.22	1963.22	3101.03	1787.79	1241.47	1190.63
Selenos	29.0025	23.5558	29.0348	35.0171	27.0944	43.4525	40.0753	54.6802	47.3792	39.3458	47.6821	39.6087	57.7287	38.2978	48.7344
Selenot	39.5347	22.1487	35.3785	33.1964	20.4015	29.6702	24.0107	24.9218	30.5201	29.37	29.6964	27.5951	32.8258	17.3194	28.7167
Selenow	339.413	416.728	282.861	262.477	208.529	204.751	118.039	89.2333	95.0473	65.716	73.0493	57.1286	88.1892	95.3617	71.564
Sem1	66.6336	48.3557	66.6396	60.003	43.7127	56.5164	51.2467	54.1397	46.2373	37.3638	45.759	42.1806	40.3404	26.0033	28.7373
Sf3b6	46.8945	36.8013	44.3304	38.5093	28.9211	31.0209	24.0956	25.1422	18.6142	15.7304	16.6305	13.4006	17.7644	13.6813	12.8957
Sgf29	15.7632	19.3464	14.8854	13.6473	12.2439	9.45537	7.71739	9.92808	9.06103	8.73161	8.35359	6.63048	10.3461	11.4279	9.36544
Sgo1	10.0043	5.85612	10.5235	9.12873	5.04279	5.75868	3.02615	3.22331	4.1183	1.89325	1.9847	0	0	0	0
Sgo2a	5.39026	1.6559	5.29253	5.50553	1.50989	2.57684	1.52636	1.29109	1.77511	1.39148	1.38731	0	0	0	0
Shfl	4.71063	4.46263	3.71093	3.81366	4.17956	5.63497	10.7588	9.37043	10.5414	19.9902	18.6376	18.4564	15.6222	20.3411	22.9225
Shld1	4.82572	5.78041	6.33181	5.13669	4.06012	4.22409	2.9261	1.37413	3.84435	2.84868	2.57796	4.09251	3.19323	2.75398	2.06041
Shld2	2.22285	1.59431	1.73358	2.49858	1.73956	2.92821	4.75162	2.36038	3.10143	3.65362	3.29871	3.74088	4.74523	3.1065	8.0891
Shtn1	0	0	0	0	0	1.13053	1.26263	2.69165	3.42972	4.56795	3.83986	4.45931	4.32458	5.11869	5.53607
Siglecf	0	0	1.14236	0	0	0	0	0	0	0	0	0	0	0	0
Sinhcaf	13.8751	6.20972	6.48812	6.08459	3.09973	2.9881	2.88076	2.34643	2.38824	2.17731	1.64483	1.10182	1.22556	0	0
Slc49a4	3.2793	3.58414	3.8625	3.68919	4.05935	3.04645	2.78577	2.64979	2.59825	2.53396	2.3569	3.04808	4.24586	8.79257	8.36452
Slf1	5.39797	2.23889	3.98823	4.66157	1.56764	2.4434	1.9117	1.5987	1.81214	1.3275	1.52901	0	0	0	0
Slf2	6.67394	3.41302	7.2417	6.15792	2.45968	4.0861	2.9154	3.17704	3.34424	2.98311	2.74892	2.15229	2.15077	0	1.09494
Smim10l1	12.388	6.31981	11.7202	13.8477	9.52976	18.6282	18.4743	22.4806	20.7115	28.2166	27.4105	36.0433	22.3537	11.3594	18.1655
Smim24	1.47386	1.94938	2.022	2.14807	2.82522	2.03704	2.05647	2.38425	1.34981	1.99701	1.57987	0	0	0	0
Smim26	13.672	11.2011	9.08122	9.60132	6.53745	9.80074	7.34254	13.5211	8.79466	5.31348	7.46948	10.2229	18.8086	16.4595	11.3511
Snu13	108.876	106.067	90.2445	75.6747	61.2164	47.3653	39.408	36.5963	36.1121	26.1945	26.977	18.636	22.0051	20.8629	16.6467
Spaca6	2.71165	1.43899	2.84145	2.05201	1.20531	4.19175	5.76642	5.08785	3.76879	3.88234	5.32675	4.56685	1.19866	0	1.75563
Spaca9	0	1.10343	0	0	1.58644	1.13306	0	0	0	1.1365	0	0	0	0	0
Spindoc	5.56999	5.12779	3.12552	2.51756	2.79956	2.0263	2.32088	2.54289	2.11726	2.09261	1.91347	2.09616	1.67115	1.34691	1.08193
Spink1	8.73945	12.168	34.7566	63.6454	91.3501	198.053	69.8824	6.08879	20.3151	17.3476	24.605	10.3807	11.7306	0	0
Spout1	30.474	34.5119	22.7336	20.7127	18.0913	14.7527	11.0267	11.878	13.028	9.74045	11.0776	7.23182	11.1307	12.2902	11.5873
Sqor	1.35354	1.52995	2.01213	2.60522	5.19363	3.20756	6.84709	7.0992	19.5644	21.458	31.2754	30.3054	32.2306	35.176	36.4159
Srp54b	19.821	9.87344	18.4085	12.9098	8.20956	11.7303	10.0251	9.7479	10.2279	10.5299	10.4511	8.9815	10.9401	3.04271	6.83446
Ss18l2	22.8692	21.8905	22.7011	17.4878	15.8026	26.3086	22.7161	30.7833	23.7073	25.4617	35.164	23.6544	43.7289	25.2294	29.8152
Ssc4d	1.78352	1.48373	1.30831	1.37362	1.02435	0	0	1.48664	0	1.04475	0	1.10224	1.12323	2.77439	1.79818
Stimate	5.13823	6.32472	4.44932	4.61098	4.3099	4.01647	3.78711	5.73072	6.17146	6.24611	7.1821	4.98644	4.04041	3.34486	4.08095
Stk26	4.9111	2.72044	4.54296	3.38846	2.2168	2.71663	3.24485	1.94451	3.63223	3.18648	2.08748	1.7262	0	0	0
Stn1	4.23989	5.32583	3.76037	3.0077	2.22136	2.24999	1.68952	1.8925	2.29661	1.7766	1.97251	1.35259	1.38028	0	0
Stra6l	0	2.36751	2.66825	4.32312	5.30331	7.59617	8.75436	11.1648	19.5012	22.9379	20.3906	13.6035	26.9339	44.7956	36.2347
Stxbp3	7.01233	3.22215	6.20492	6.84448	3.65636	4.88508	5.50167	5.75704	6.03134	5.9397	5.15761	6.47769	4.54429	2.51728	4.58095
Sugct	0	0	1.1239	1.58231	1.4387	2.40229	1.39897	5.64312	4.84373	7.55348	5.33315	12.1466	9.58412	7.8867	7.77705
Sult2a8	0	0	1.21785	1.11577	0	0	0	5.98528	6.92406	22.5755	19.5999	43.8853	53.0044	78.2911	92.4101
Susd6	10.0109	10.2157	11.9035	10.783	11.6325	10.8318	8.75079	8.20298	8.20142	8.05337	6.34931	7.32382	7.14191	4.95055	12.3841
Svbp	80.0108	95.8054	89.5988	72.8434	58.7268	49.2196	36.6019	29.2255	26.9487	16.2424	15.733	11.4337	10.929	10.7453	6.44496
Taf4	10.0036	9.52389	11.168	9.96218	8.64882	6.75384	5.58854	5.95481	4.75489	4.95465	3.94744	3.47176	3.56953	2.46118	2.69679
Tarbp1	2.06569	2.41101	2.40962	1.58448	1.75361	1.3676	1.39637	1.08573	1.42958	2.18449	1.34344	0	0	0	0
Tasor	2.80946	1.62258	3.56134	3.42087	2.19376	3.13415	2.66836	2.69929	2.50043	2.28454	2.22233	2.49406	2.27288	0	1.87418
Tasor2	1.78062	0	1.47181	1.45824	0	1.17143	1.14982	1.07378	1.09752	1.12195	0	0	0	0	0
Tcaf1	2.74723	1.34966	1.33698	1.18818	0	0	1.414	1.14641	1.11004	1.32944	1.9991	1.40044	0	0	0
Tceal9	135.126	62.4583	148.777	178.266	84.0905	174.517	123.369	107.832	127.58	111.23	140.062	80.3226	37.4324	8.81675	15.552
Tcim	4.98024	2.13893	3.6759	5.64247	9.7996	20.1706	27.5933	10.5694	13.8775	19.3131	15.5288	15.3964	12.6474	4.07309	13.6037
Tedc1	7.66975	8.23437	6.95301	6.88699	5.56696	3.42326	2.96363	3.39773	3.28035	2.2965	1.81177	1.04825	0	0	0
Tedc2	13.3604	13.1718	13.5434	10.8798	9.42935	7.12976	7.88939	7.10829	5.9159	5.09786	6.26794	4.65442	19.6623	32.7291	36.1605
Tent2	16.9256	10.1026	16.8132	16.5186	10.4469	10.6054	8.89324	11.6969	11.7164	13.1128	12.2976	10.8487	8.48577	3.41925	3.7532
Tent4a	8.60733	10.5585	8.90863	9.74377	10.0391	7.02249	6.77769	6.99715	7.61573	6.8629	6.53167	5.65461	3.69873	3.289	2.9948
Tent4b	8.63922	8.05798	8.95134	9.24769	6.64892	6.91414	5.81085	8.22722	7.38572	9.26681	7.12943	11.5485	5.12501	3.03408	4.24997
Tent5a	5.75861	4.70373	9.12501	10.8825	10.5594	20.372	15.877	7.0107	14.5417	16.0843	11.7623	16.4613	5.4855	2.08349	2.43262
Tent5c	50.8749	65.2957	68.4843	82.1071	102.627	70.1491	49.5049	25.6228	34.242	12.3968	9.44418	1.90783	1.86716	1.27429	0
Tepsin	6.52978	5.82943	6.03396	5.71228	5.99902	4.64196	5.70449	5.81128	3.50177	2.73519	3.50116	2.80803	3.38884	4.18924	4.24307
Tex52	1.50541	1.64316	1.80332	1.45764	1.35725	1.29706	0	0	0	0	0	0	0	0	0
Tgfbr3l	2.0313	1.60461	1.64745	2.3403	1.73925	2.36388	1.88648	4.85997	4.93162	4.48727	6.08559	4.90635	3.72238	1.82598	2.70001
Thap12	14.7157	12.1356	12.3465	11.9666	7.92744	7.60727	6.19945	11.7194	9.65985	9.57316	9.3092	8.12585	8.80525	4.62504	3.70081
Them7	0	0	0	0	1.0011	0	1.15717	2.56771	2.901	3.35261	4.23952	4.06979	4.53231	6.96934	5.04467
Tigar	1.14058	0	0	0	0	0	1.02416	1.7153	1.36841	0	1.10202	0	1.65412	2.1706	2.07662
Timm29	19.3728	21.5298	18.7714	14.6517	15.4874	13.4442	10.8669	12.5265	11.2744	11.8027	10.4946	8.05397	9.11747	11.981	9.66199
Tkfc	11.5212	15.5965	15.9171	30.4805	60.2706	73.702	115.947	80.0503	164.165	196.699	195.515	186.832	81.7343	248.792	105.119
Tle5	147.362	208.915	162.345	159.939	202.627	153.479	143.453	157.871	201.752	188.472	234.644	176.571	319.473	597.438	395.278
Tlnrd1	30.8299	44.1559	33.4738	31.6738	37.2676	25.2128	18.7864	14.8253	13.7975	10.7889	9.5618	5.8132	2.71556	1.94615	1.62019
Tmem131l	11.8529	12.6593	14.1338	15.2282	14.131	13.4769	11.0123	9.89513	7.71382	6.19845	5.10696	4.49882	3.55251	1.84212	1.57335
Tmem185a	8.85384	8.8791	7.37209	5.88763	6.25486	4.57946	5.14068	5.29831	6.89597	8.42327	7.59832	7.08384	8.02694	6.46229	5.98669
Tmem185b	8.2232	9.75351	7.00419	6.55601	7.23676	6.27661	5.57674	7.91024	7.75093	7.48774	7.66448	5.35392	4.32166	4.51785	4.083
Tmem263	5.62641	3.90761	5.09031	5.36696	3.69578	4.90217	5.97061	5.06322	5.14822	5.26638	5.44477	5.46994	2.7666	0	1.91649
Tmem267	0	0	0	0	0	1.31985	0	0	0	0	0	0	1.2492	0	0
Tmem268	3.23116	4.86792	4.38872	4.8414	7.48834	9.48643	10.9968	9.19642	7.44577	7.1567	4.08761	2.8479	3.36638	1.93573	2.04244
Tmem273	0	0	0	0	0	1.20076	0	0	1.41544	0	0	0	0	0	0
Tmem35b	3.51287	4.1196	4.64626	4.25772	3.69135	4.10027	3.60603	3.80143	4.4917	4.64632	6.39891	6.12308	4.58539	5.03674	3.3711
Tmem94	11.5381	14.9048	10.5551	9.93855	10.772	7.47775	6.98429	6.17944	6.22025	8.41941	6.55939	7.17179	6.29036	7.41284	6.47501
Tnfsfm13	2.79862	4.91028	3.22761	3.59399	3.23378	2.67895	3.5029	5.3475	5.81196	7.62086	5.91489	10.6384	6.9882	8.12377	6.43487
Tns2	3.93749	4.08246	3.06702	3.018	3.57319	3.64502	4.63415	9.70909	6.21999	7.1211	6.82876	10.1379	8.734	5.67042	7.48206
Togaram1	3.30102	0	2.55107	2.08417	0	1.64381	1.33216	1.30001	1.17234	1.22098	1.14449	1.12927	0	0	1.16667
Tpbgl	0	0	0	0	0	0	0	1.02171	1.49839	2.67069	2.7931	3.13898	2.79024	3.84288	1.76093
Trim80	0	0	0	0	0	0	1.13668	1.268	0	1.48506	1.92752	2.25136	2.51792	0	0
Trir	201.792	231.903	197.21	178.288	177.082	150.589	131.284	114.913	103.44	72.3465	85.6753	70.6706	97.875	104.242	100.342
Trmo	9.62848	8.24834	15.7298	12.1991	8.41958	10.1531	6.43977	4.45157	5.96441	2.1952	2.22415	1.61365	1.79424	1.83182	1.28856
Trmt9b	0	0	0	0	0	0	0	0	0	1.23046	2.12108	3.32314	0	0	0
Trp53rka	9.1532	10.0272	6.82163	6.09757	6.46005	4.92943	5.82032	5.84263	4.33569	4.82243	4.63828	4.89665	4.28348	4.3813	3.20754
Trp53rkb	2.57974	2.07848	1.41854	1.41766	1.40145	1.09593	1.38261	1.13368	1.07893	0	0	0	0	0	0
Tspoap1	4.19942	3.97035	3.60047	3.58174	3.42249	3.27344	2.07248	2.4941	1.36637	0	0	0	0	0	0
Tut4	14.9394	8.36401	6.36816	16.8856	9.31024	17.048	14.8479	16.4791	12.429	16.0551	13.6396	15.854	7.65271	2.86621	2.23557
Tut7	18.0714	9.80257	20.6422	19.5527	9.96382	15.1482	11.1729	10.9909	9.73545	8.73312	7.8753	8.02286	5.92146	4.22446	7.49273
Twnk	11.1419	12.3351	9.6667	7.97049	9.93812	10.9149	9.6299	8.15661	6.4377	5.60262	5.18645	6.54294	6.62217	5.7381	4.87858
Ubl4a	37.8661	23.9479	20.8812	28.7659	30.0353	16.1713	15.0411	14.7309	17.6405	14.3236	16.4881	12.74	18.8578	12.127	8.67973
Ufd1	16.7075	13.2359	15.9953	14.8437	11.1741	11.7834	11.878	17.0899	14.3947	13.1008	11.9265	11.6858	15.374	8.81514	13.1368
Umad1	5.1929	4.32361	7.55926	7.36587	7.01193	5.33775	4.8339	3.09506	4.48145	6.52421	4.52554	5.18627	4.85343	3.83336	2.73886
Unc93a2	0	0	0	0	0	0	2.5237	2.87889	4.85112	10.5764	8.39873	19.8571	2.22153	0	0
Uqcc3	24.4037	27.7468	21.1077	19.7055	18.6616	22.509	24.0389	30.1824	21.381	17.781	18.4146	24.6388	33.6233	31.2081	19.7169
Usf3	3.5041	2.20235	3.54127	3.25147	1.6952	1.93135	1.20833	1.47368	1.36925	1.56551	1.35645	1.69151	1.8596	1.08074	1.36515
Utp11	20.3408	9.98974	15.803	13.5382	7.80363	9.89306	8.11864	7.68564	8.86836	7.80108	10.0865	8.33235	7.25545	4.01838	6.02556
Utp25	5.22998	4.39734	3.21836	2.94431	2.36027	2.39313	2.33709	2.02581	1.77087	1.65752	1.15926	1.28246	1.11966	1.25533	1.11633
Utp4	31.2067	26.1699	21.5747	18.3355	13.4078	10.121	8.1114	12.3066	8.30508	7.32925	7.03874	5.26083	5.686	6.06669	5.74252
Vcpkmt	9.7328	12.3391	7.55296	7.4051	5.97852	4.89755	4.20794	2.6984	4.21646	4.55312	4.98938	4.72568	3.86531	2.41938	1.21171
Vegfd	0	0	0	0	0	0	0	0	1.43616	1.22084	1.62724	0	1.40826	0	0
Virma	8.92943	6.53631	7.84484	7.03456	5.41865	4.2844	4.06329	4.6145	4.87163	4.93505	3.5683	3.06862	2.31094	1.63274	1.80188
Vps26c	9.38445	8.8373	9.27191	9.04365	7.76436	8.12999	7.15747	10.3322	8.87995	9.1834	8.44401	9.85278	7.0771	5.8837	5.40204
Vps35l	10.2788	9.27412	10.2225	7.62161	7.79517	5.34222	5.16797	4.60162	5.26934	5.36095	3.28727	4.45449	3.6287	3.18642	3.37232
Vps50	5.93433	2.42033	3.441	2.99451	1.44404	1.81696	1.80749	1.90175	1.37322	1.44464	1.63999	1.65055	1.35596	0	0
Vsir	3.39836	4.31755	5.49383	6.38882	7.66766	7.73325	7.10413	7.77625	7.88303	4.60899	4.41012	0	1.24084	0	0
Wapl	17.9687	8.48329	17.4938	18.7759	7.86407	9.68274	7.13525	8.58784	7.21112	6.35003	5.27651	4.72018	5.61954	2.12385	4.03278
Washc1	12.7221	14.6639	11.1566	10.322	10.2593	8.29934	8.24008	10.727	6.91475	6.65379	7.90456	8.58225	6.65241	6.90649	4.60128
Washc2	7.72607	5.38327	6.68464	7.1428	5.19775	6.12118	6.21012	7.2772	6.46802	7.64323	5.58589	6.88175	7.26522	4.87228	6.39113
Washc3	8.70214	10.8518	13.1614	9.36542	9.47498	12.2352	10.6939	12.9953	11.3542	11.8379	8.5135	13.6938	13.9116	11.7078	11.0547
Washc4	3.1446	1.10606	2.45297	2.29751	1.02239	2.16872	2.11916	2.26267	1.99103	2.3055	2.16675	2.57075	1.96956	0	1.62908
Washc5	8.96949	9.26933	7.81966	7.37769	5.92024	4.92402	5.4658	6.82509	7.32289	7.95226	6.37104	6.07766	5.56327	3.83857	3.33235
Wdcp	1.36128	1.47324	1.63465	1.31283	0	0	1.00998	0	0	0	0	0	0	1.07849	0
Wdr20	7.58761	5.05105	6.0296	5.6956	4.98828	4.62342	4.78583	5.01237	5.31792	4.85132	5.98468	4.60816	4.32952	3.76769	4.43345
Wdr83os	48.0285	72.3634	47.3644	49.3007	56.8369	52.6061	41.5746	46.9201	37.9158	33.1968	37.1788	34.6218	53.4267	66.1645	38.1506
Wfdc21	0	0	2.05697	6.30421	10.2794	24.5689	24.9879	17.6352	8.7208	11.6547	6.92492	2.8937	34.1724	326.692	450.799
Xntrpc	7.90876	8.35386	8.37216	6.68978	5.14015	4.55014	3.68817	3.05164	4.98421	2.97481	3.3447	2.46927	2.80901	0	0
Yju2	7.58978	8.57854	4.85497	4.31342	4.27276	3.25141	3.77664	4.3623	3.25764	3.15302	3.11764	3.05192	3.59977	3.38783	2.79775
Zbed5	8.80198	10.4203	7.45275	6.07088	8.80854	7.92073	8.01489	10.4632	7.93102	8.21853	10.1354	12.6441	9.52482	12.8912	9.20061
Zfp24	4.11896	3.31458	4.06238	4.16243	2.90303	3.36228	2.99513	3.75012	3.99606	2.8114	2.70738	4.18162	2.70349	1.20324	2.49873
Zfp512b	10.2273	8.863	7.43552	6.86559	8.41136	7.34776	6.70498	11.6666	9.45417	10.4701	10.3601	8.32544	7.18386	3.2411	4.31484
Zfp607a	1.15148	0	0	0	0	0	0	0	0	0	0	0	0	0	0
Zfp638	5.28519	1.2611	4.1056	4.66853	1.09209	3.52182	2.43899	2.35056	2.68747	2.62162	2.68828	2.60861	2.11144	0	1.92283
Zfp65	2.39049	0	1.64116	0	0	0	1.38331	0	0	0	0	0	1.30958	0	0
Zfp729b	1.00538	0	0	0	0	0	0	0	0	0	0	0	0	0	0
Zfp969	0	1.52501	1.1158	0	0	0	0	0	0	0	0	1.47397	1.23987	1.71818	1.19152
Zfp970	1.03826	0	0	1.50669	0	2.17007	1.60781	2.53782	1.23034	2.40484	1.37556	1.90725	2.79756	2.09208	5.05897
Zfp971	1.5264	0	1.93331	2.01775	0	0	0	1.19284	0	0	0	1.6515	1.0621	0	1.25459
Zfp979	2.5697	0	0	0	0	0	0	0	0	0	0	0	0	0	0
Zfp983	1.19184	0	1.35053	0	0	0	1.30842	0	0	0	0	1.03046	1.00303	0	0
Zfp984	4.43444	1.12371	3.12991	3.68846	0	1.60135	1.48872	1.60419	1.15535	1.26673	0	0	0	0	0
Zfp991	2.46151	0	2.10346	1.64653	0	1.0154	1.12596	0	0	0	0	0	0	0	0
Zfp992	2.59791	0	1.49144	1.49648	0	1.0013	0	0	0	0	0	0	0	0	0
Zfp993	3.71948	1.26473	2.03471	1.91865	0	1.45825	1.25286	1.54774	0	0	1.23764	0	0	0	0
Zgrf1	2.60611	0	2.35304	2.13072	1.01669	1.211	1.00059	0	0	0	0	0	0	0	0
Znrd2	38.6771	47.3869	33.9764	26.9299	28.0689	20.2582	20.1587	17.8755	15.4905	10.9748	11.1332	9.1779	9.96288	12.8907	9.32385
Zpr1	18.4537	17.0622	13.822	12.0908	9.67027	9.29551	9.82784	14.9939	8.90003	8.33507	7.22075	10.2058	15.1321	11.1694	15.1238
Zswim9	0	1.28339	1.29443	1.65162	1.21972	0	1.09594	0	1.63971	0	1.5419	1.50342	0	0	0
Zup1	2.97713	1.446	2.18599	2.81476	1.16786	2.50133	2.89795	1.4609	1.49352	1.66238	1.74867	2.12777	1.56609	0	1.00549
0610008F07Rik	0	0	0	0	0	0	0	0	0	0	0	0	1.8091	1.291	1.72282
0610040B10Rik	0	0	0	0	0	0	1.04574	1.26478	1.06477	0	1.74192	1.62397	1.42049	1.25169	0
1110006G14Rik	0	0	0	0	0	0	0	0	0	0	0	0	0	2.30692	1.07603
1110054M08Rik	0	1.01466	0	1.07148	0	1.35024	1.72836	3.34638	3.34986	2.60726	4.2904	6.15749	5.51745	4.84964	2.11885
1200007C13Rik	0	0	0	0	0	0	0	0	0	0	0	0	0	0	2.14141
1300015D01Rik	0	0	0	0	0	0	0	0	0	0	0	0	0	0	1.77086
1500017E21Rik	0	0	0	0	0	0	0	0	0	0	0	0	0	2.0496	3.27616
1700001C19Rik	0	0	0	1.03066	2.07301	1.94072	2.19421	3.79913	4.09006	5.35153	5.32232	4.46545	6.91092	5.15467	3.39917
1700001L05Rik	0	0	0	0	0	0	0	0	0	0	0	0	1.11844	0	0
1700003F12Rik	0	0	1.77508	1.29198	3.31787	3.47211	4.73033	2.8749	1.36963	0	0	0	0	0	0
1700020L24Rik	0	1.29893	1.78065	2.20605	4.44621	2.50498	3.17816	3.14843	0	2.4302	0	0	0	0	0
1700021J08Rik	0	0	0	1.63675	0	0	1.18922	1.37444	1.09282	1.72212	0	0	2.40835	0	1.70189
1700023L04Rik	0	0	0	0	1.06715	0	0	0	0	0	0	0	0	0	0
1700024N20Rik	0	0	0	0	0	0	0	0	0	0	0	0	2.03862	1.57996	0
1700025G04Rik	0	0	0	0	0	0	0	1.14686	1.12208	1.26494	1.33808	0	0	0	0
1700029I15Rik	0	0	0	0	0	1.02736	1.31913	2.23468	0	0	1.57972	0	0	0	1.22764
1700030C10Rik	0	1.1432	0	0	0	0	0	0	0	0	0	0	0	0	0
1700056E22Rik	0	1.11245	1.17352	0	0	0	0	2.1386	1.20585	1.53564	1.96762	2.56262	1.36518	1.33631	0
1700067K01Rik	0	0	0	0	0	0	0	0	0	0	0	0	1.55597	0	0
1700088E04Rik	0	0	0	0	0	0	0	0	0	0	0	0	0	0	1.03536
1700109H08Rik	0	0	1.03136	1.1839	0	0	0	0	0	0	0	0	0	0	0
1700121F15Rik	0	0	0	0	0	0	0	0	0	0	0	1.45498	0	0	0
1810010H24Rik	0	1.9391	2.40559	4.75305	16.5399	21.0126	19.5442	6.10827	3.17362	3.22643	2.67522	5.46092	5.37874	1.16599	1.22766
1810021B22Rik	0	0	0	0	0	1.15325	0	1.06948	0	0	1.14135	1.24229	2.15915	3.30566	3.21451
1810046K07Rik	0	0	0	0	0	0	0	0	0	1.38271	2.11106	0	5.11192	1.30227	0
1810062G17Rik	0	0	0	0	0	0	1.23638	0	1.0851	0	0	1.84901	1.01602	0	0
1810064F22Rik	0	0	0	0	0	0	0	0	0	0	0	0	0	0	1.02031
2010003K11Rik	0	0	0	0	0	0	0	6.30264	4.85506	5.63441	8.45998	30.9168	6.45934	6.83825	14.83
2010012P19Rik	0	0	0	0	0	0	0	0	1.09573	0	0	0	0	0	0
2010109A12Rik	0	0	0	1.11693	0	0	0	0	0	0	0	0	0	0	0
2010315B03Rik	0	0	0	0	0	0	0	0	0	1.13327	1.10473	1.49767	1.61234	0	1.15447
2210011C24Rik	0	0	0	0	0	0	0	0	0	0	0	0	1.259	0	0
2210408F21Rik	0	0	0	0	0	0	0	0	0	0	0	2.2938	2.84765	0	0
2210417A02Rik	0	0	0	0	0	0	0	0	1.07604	1.92348	1.59703	1.09	0	0	0
2310001H17Rik	0	0	0	0	0	2.13771	1.70627	1.55729	1.84101	1.80628	2.70844	3.02983	5.24035	10.4872	4.61397
2310010G23Rik	0	0	0	0	0	0	0	1.27012	0	0	0	0	0	0	0
2310015A10Rik	0	0	0	0	0	0	1.2056	1.54854	0	0	0	0	0	0	0
2410133F24Rik	0	0	1.33469	0	0	0	0	0	0	0	0	0	1.35619	1.10113	0
2700033N17Rik	0	0	0	0	0	0	0	1.95615	1.03528	1.15068	0	1.64351	0	0	0
2700046G09Rik	0	0	0	0	0	0	1.17228	1.74951	1.5675	1.24686	1.55069	2.11229	0	0	0
2810408A11Rik	0	0	0	0	0	0	0	1.06097	0	0	0	0	0	0	0
2810410L24Rik	0	0	0	0	0	0	1.05157	1.98245	0	0	1.25352	1.77119	0	0	0
2900005J15Rik	0	0	0	0	0	1.06815	1.45302	2.66165	1.60957	2.67419	2.7678	3.2804	2.16245	0	1.02548
2900008C10Rik	0	0	0	0	0	0	0	0	1.01992	1.26846	1.7374	1.35532	1.3291	0	0
2900052L18Rik	0	0	0	0	0	0	0	2.63101	1.54593	2.06732	2.18865	1.32475	2.14401	0	1.07854
3110045C21Rik	0	0	0	0	0	1.02308	0	0	0	0	0	0	3.40279	0	1.93626
3930402G23Rik	0	0	0	0	1.68237	6.33059	17.9456	8.30304	10.3067	6.9896	6.53588	2.31525	0	0	1.13347
4430402I18Rik	0	0	0	0	0	0	0	0	1.15048	0	1.46728	0	1.96851	0	0
4632427E13Rik	0	0	0	0	0	0	0	1.24005	0	0	0	0	0	0	0
4632428C04Rik	0	0	0	1.64372	1.19516	1.87208	2.38053	1.22791	1.78899	1.85793	1.43103	2.6571	0	0	0
4632433K11Rik	0	0	1.00077	0	0	0	0	0	0	0	0	0	1.25478	0	0
4732419C18Rik	0	0	0	0	0	0	0	0	0	0	0	0	0	1.32439	1.60786
4732444A12Rik	0	0	0	0	0	0	0	0	0	1.56634	1.52714	2.38152	3.79864	2.27291	1.2517
4732463B04Rik	0	0	1.10896	1.18768	1.15086	1.0278	1.23517	2.53972	1.39916	1.92099	2.38733	2.69248	0	0	0
4732465J04Rik	0	0	0	0	0	0	0	0	0	0	0	0	1.20453	1.17787	2.94596
4833418N02Rik	0	0	0	0	0	0	0	1.6523	1.0539	0	0	1.32186	1.52896	0	1.14305
4921530L18Rik	0	0	1.12758	1.0964	0	0	0	0	0	0	0	1.23868	0	0	0
4921531C22Rik	0	1.25667	1.25124	0	0	0	0	1.13541	0	0	0	0	0	1.35085	0
4930438A08Rik	0	0	0	0	1.74124	2.41305	1.58858	3.49846	1.82219	1.53097	0	0	0	0	0
4930470G03Rik	0	0	0	0	0	1.133	1.80392	1.43276	1.23705	1.61643	1.47548	2.37893	1.06369	0	1.21618
4930500M09Rik	0	1.67131	1.82373	0	0	0	0	0	1.05181	0	0	0	0	0	0
4930506C21Rik	0	0	0	0	0	0	1.44627	5.05496	1.21385	1.61322	6.99891	3.9414	1.12893	0	0
4930534D22Rik	0	0	0	0	0	0	0	0	0	0	0	0	0	2.0108	0
4930538E20Rik	0	0	1.08804	0	0	0	0	0	0	0	0	0	0	0	0
4930579K19Rik	0	0	0	0	0	0	0	1.19786	0	0	1.18427	1.06074	0	0	0
4930594M22Rik	0	0	0	0	0	0	0	0	1.10461	0	0	0	0	0	0
4933411K16Rik	0	0	0	0	0	0	0	0	0	0	0	1.06789	0	0	0
4933421O10Rik	0	0	0	0	0	0	0	1.48302	1.15139	1.10704	0	1.38557	1.23109	0	0
4933440N22Rik	0	1.21384	0	0	0	0	0	2.37104	0	1.17603	1.77993	1.07987	0	0	0
5031434O11Rik	0	0	0	0	0	0	0	0	0	0	0	1.00323	0	0	0
5033430I15Rik	0	0	0	0	0	1.29739	0	1.25885	2.2371	1.70075	2.22603	1.17264	0	0	0
5330417C22Rik	0	0	0	0	0	0	0	0	1.15794	1.4073	1.10144	0	0	0	0
5330430P22Rik	0	0	0	0	0	0	0	0	0	1.00484	0	0	1.34467	1.41541	0
5730409E04Rik	0	1.07807	0	0	0	0	0	1.84462	1.83718	2.49869	2.07565	2.33041	1.84728	2.47968	1.72704
5730420D15Rik	0	0	0	0	0	0	0	2.6846	0	0	0	4.27454	0	0	0
5730435O14Rik	0	0	0	0	0	0	0	0	0	0	0	0	0	2.02216	1.49796
6230400D17Rik	0	0	0	0	0	0	0	1.07878	0	0	0	0	0	0	0
6330403L08Rik	0	0	0	0	0	0	0	0	0	1.06778	1.30534	0	0	0	0
6430550D23Rik	0	0	1.2948	0	0	0	0	0	0	0	0	0	0	0	0
6720401G13Rik	0	1.19659	0	1.1324	0	1.89621	1.25236	1.12257	1.83593	1.49378	1.52941	1.47835	0	0	1.92168
6720427I07Rik	0	0	1.13893	0	0	1.80236	0	1.11077	0	0	0	1.41959	1.02087	0	0
9030616G12Rik	0	0	0	0	0	0	0	0	0	0	0	1.29024	1.94178	1.87676	3.61631
9030619P08Rik	0	0	0	0	0	0	0	0	2.91674	3.98464	4.83509	20.7148	56.1301	3.88972	2.36964
9030622O22Rik	0	0	0	0	0	1.11841	1.04243	0	1.73726	2.72519	2.14293	3.2938	3.77392	2.27677	3.44492
9130230N09Rik	0	0	0	0	0	0	1.51953	1.53064	0	0	1.06885	0	0	1.11361	0
9130409I23Rik	0	0	0	0	0	0	0	0	0	0	0	0	0	1.72506	0
9230111E07Rik	0	0	0	0	0	1.14121	0	1.61214	0	0	0	1.29667	0	0	0
9230112E08Rik	0	1.05798	1.04024	0	1.30702	1.36012	0	1.2199	1.04798	0	0	0	0	0	1.41052
9230114K14Rik	0	0	1.03931	1.06742	0	0	0	0	0	0	0	0	0	0	0
9330162012Rik	0	0	0	0	0	0	0	0	0	0	0	1.21286	1.34392	1.10515	0
9530077C05Rik	0	0	1.01136	0	0	0	0	0	0	0	0	0	0	0	0
9630013D21Rik	0	0	0	0	0	0	0	0	0	0	0	0	3.23323	0	1.26624
9930111J21Rik2	0	0	0	0	0	0	1.34855	0	0	0	0	0	0	0	0
A030003K02Rik	0	0	1.20504	0	0	0	0	0	0	0	0	0	0	0	0
A130014A01Rik	0	0	0	0	0	0	0	0	0	0	1.00304	1.03854	0	0	0
A1bg	0	0	0	0	0	0	0	0	0	0	0	0	2.52286	0	0
A230072C01Rik	0	0	0	0	0	1.18814	0	0	0	0	0	0	0	0	0
A230083G16Rik	0	0	0	0	0	0	0	0	0	0	0	0	1.5017	0	1.74495
A330035P11Rik	0	0	0	0	0	0	0	0	0	0	0	1.25458	0	0	0
A330040F15Rik	0	0	0	0	0	0	0	0	1.29989	2.72556	2.0531	2.14892	0	0	0
A330094K24Rik	0	0	1.44736	1.57353	0	0	0	0	0	0	0	0	0	0	0
A430046D13Rik	0	1.5053	1.08102	0	1.11922	1.15825	0	0	0	0	0	0	1.51181	0	0
A430071A18Rik	0	0	0	0	0	0	0	0	0	0	0	1.66073	0	0	0
A530020G20Rik	0	0	0	0	0	0	0	0	1.05613	1.19388	1.1444	1.003	0	0	0
A530084C06Rik	0	0	0	0	1.28047	2.18513	3.17692	1.50809	2.39642	3.93321	1.99816	3.60771	2.15169	1.13269	1.70565
A630052C17Rik	0	0	1.30266	1.0882	0	1.14193	0	0	0	0	0	0	0	0	0
A630076J17Rik	0	0	0	0	0	2.04672	6.65761	3.76606	15.1061	26.4585	14.9351	6.36004	1.52028	2.36928	0
A730011C13Rik	0	0	0	0	0	0	0	1.45604	0	0	0	0	0	0	0
A730017L22Rik	0	0	0	0	0	1.03226	0	0	2.18987	1.13691	1.68534	0	0	0	0
A730036I17Rik	0	0	0	0	1.07038	1.33458	0	0	0	0	0	0	0	0	0
A930001C03Rik	0	0	0	0	0	0	0	0	0	0	0	1.35522	0	0	0
A930018P22Rik	0	0	0	0	0	0	0	0	0	0	0	1.08313	0	0	0
A930029G22Rik	0	0	0	1.07506	0	0	0	0	0	0	0	0	0	0	0
A930033H14Rik	0	0	0	0	0	0	0	1.0029	0	0	0	0	0	0	0
A930039A15Rik	0	0	0	1.36592	1.42059	0	1.67913	0	1.0997	1.77186	2.79895	2.55558	2.15935	0	2.51545
AA467197	0	0	0	0	1.4151	3.40991	2.445	2.35877	0	1.2673	0	0	0	0	0
Aatk	0	0	0	0	1.05421	0	1.22095	0	0	1.34174	0	0	0	0	0
Abca6	0	1.23969	1.82085	3.09626	3.47492	5.47203	10.37	19.8157	9.88508	14.6859	9.18029	18.6377	20.1446	6.55215	7.38005
Abca8a	0	0	0	1.50822	1.81356	6.7898	17.4754	9.15271	16.6505	24.2385	13.8889	23.5551	9.4647	8.42071	3.42177
Abca9	0	0	0	0	0	0	0	0	1.02784	1.5412	0	0	0	0	0
Abcb11	0	0	2.58217	6.37989	5.87277	14.5697	35.6994	13.7012	35.0272	53.5739	31.8613	45.5209	76.1209	58.4787	56.5006
Abcb1a	0	0	0	0	0	0	0	0	1.00186	2.06934	1.10767	2.82473	0	0	0
Abcd2	0	0	1.07033	2.24197	2.4025	6.43949	16.8091	31.0973	18.4519	25.5885	17.1403	29.5723	18.5084	0	0
Abcg5	0	0	0	0	0	0	1.97117	12.6796	29.2779	32.7107	20.6288	59.6136	35.4232	12.6365	10.384
Abcg8	0	0	0	0	0	0	1.14805	8.35972	18.34	24.6003	15.6031	45.9606	16.6264	12.8995	8.47482
Ablim3	0	0	0	0	0	0	1.41229	1.61491	0	0	1.12122	0	2.52404	8.04626	5.75924
AC087902.1	0	0	0	0	0	0	0	1.78095	1.96091	1.04645	0	8.60241	0	0	1.7488
AC110903.1	0	0	0	0	0	1.84008	0	0	0	0	0	0	0	0	0
AC113593.2	0	0	1.82105	0	3.18542	2.65098	16.3621	93.0097	33.661	69.2262	46.8579	86.2964	57.8091	636.119	271.369
AC118710.2	0	0	0	0	0	0	0	0	0	2.4134	2.65096	26.7129	21.8141	27.2145	45.5861
AC120404.1	0	0	0	0	0	0	0	1.52086	1.01667	0	0	0	0	0	0
AC166150.1	0	0	0	0	0	0	0	0	0	1.13028	0	0	0	0	0
Acacb	0	0	0	0	0	1.321	7.28516	0	0	0	0	1.04366	2.32332	14.3533	5.15452
Acad12	0	0	0	0	0	1.05179	1.7936	0	1.21626	1.96955	1.8167	4.95578	0	1.20634	1.17949
Accs	0	0	0	0	0	0	0	1.18621	0	1.40988	1.12209	1.48562	1.42793	0	0
ACEA_U3	0	2.5085	0	1.05577	0	0	1.03787	0	0	0	0	0	1.74363	1.6234	1.65577
Ackr2	0	0	0	0	0	0	0	0	0	1.31974	1.59705	1.33465	0	0	0
Acnat1	0	0	1.46416	0	0	1.88108	3.51708	3.7705	5.72824	7.48061	19.963	7.72597	12.1486	4.46704	10.1842
Acnat2	0	0	0	0	0	0	7.07327	4.73338	9.15321	11.2502	18.2665	10.0467	27.6876	7.57235	29.0317
Acot12	0	0	1.39954	2.36355	3.22835	4.70778	7.123	13.0668	12.3015	18.0529	17.7322	34.7313	23.9825	11.4498	10.9598
Acot6	0	0	0	0	0	1.32282	3.40053	1.81653	0	1.06161	0	1.67961	0	0	0
Acpp	0	0	0	0	0	0	0	0	0	0	0	0	0	0	1.17199
Acsm1	0	0	1.15555	4.94334	9.5656	28.8828	52.4867	41.8875	71.2081	80.3141	56.3549	61.489	111.999	150.005	120.235
Acsm3	0	0	0	1.56769	1.62161	4.0808	6.06965	6.68804	5.59971	10.1276	10.6179	19.9369	20.4824	8.01336	9.76812
Acsm5	0	0	0	0	0	0	0	1.87607	4.55489	11.9386	13.703	17.5553	25.6753	19.6642	16.4389
Acss3	0	0	0	0	0	0	0	0	0	3.58816	3.16089	6.11165	4.29714	0	0
Acvrl1	0	1.10668	0	1.19866	1.4576	2.40226	2.37836	2.36788	2.0559	2.9155	1.83336	1.19006	0	0	0
Adam11	0	0	0	0	0	0	0	0	0	0	0	1.76673	1.32513	2.34456	2.05994
Adam23	0	0	0	0	0	0	1.41207	2.33685	2.5245	1.98828	1.20062	2.33409	1.38458	1.19489	0
Adam8	0	0	0	0	0	1.94254	2.60759	1.85019	1.33808	1.06207	1.49135	1.05522	0	0	0
Adamdec1	0	0	0	0	0	0	0	1.17027	1.1157	1.38026	1.25006	1.28523	0	0	0
Adamts13	0	0	1.3766	1.32812	2.10925	1.76187	2.51789	2.40797	1.60607	2.75009	2.49928	1.91968	1.80076	0	0
Adamts14	0	0	0	0	0	0	1.47832	1.47966	1.25235	1.31839	1.29251	5.45478	0	0	0
Adamts15	0	0	0	0	0	0	0	1.4578	1.33562	1.21524	1.11065	0	0	0	0
Adamtsl2	0	0	0	0	0	0	0	0	0	1.00719	1.49941	0	1.48141	0	1.75796
Adamtsl4	0	0	0	0	0	0	1.69188	2.80595	1.00465	1.64489	1.55404	1.69595	2.85101	0	0
Adap2	0	1.24884	2.15948	3.02066	2.62503	4.151	4.40735	5.56465	5.73758	7.83148	9.38041	4.63363	7.61794	4.88732	6.5566
Adcy5	0	0	0	0	0	0	0	1.12118	1.0631	1.40958	1.17254	0	0	0	0
Adcy9	0	1.28351	0	1.08067	0	0	0	0	0	1.24312	0	0	2.2669	2.61928	1.31697
Adh4	0	0	0	0	0	0	0	0	0	1.96454	2.45257	5.38483	20.3557	40.6723	54.1054
Adh6-ps1	0	0	0	0	0	0	0	0	0	1.24469	1.84303	0	2.17463	22.1309	11.6826
Adh7	0	0	0	0	0	0	0	0	0	0	0	0	1.71024	1.53521	2.48557
Adhfe1	0	0	1.29664	2.64662	4.097	9.43263	10.644	11.3552	15.4189	23.1203	27.4471	31.7015	30.823	17.8552	21.9108
Adora1	0	0	0	0	2.20138	3.52374	3.83133	5.064	4.57124	4.76758	5.29226	4.91474	8.09021	1.25668	0
Adra2a	0	0	0	0	0	0	0	1.01408	0	0	0	4.78263	0	0	0
Adrb1	0	0	0	0	0	0	1.15324	1.11434	0	0	0	0	0	0	0
Adrb3	0	0	0	0	0	0	0	0	0	1.27099	1.32659	4.29806	3.69893	1.63768	2.25958
Adtrp	0	0	0	0	1.41555	3.9132	9.87638	33.0912	37.4439	55.8173	60.4896	63.9144	38.5449	49.9085	61.3611
Afap1l2	0	1.13869	0	0	0	0	0	1.02776	1.55734	2.27328	2.20183	1.82877	0	0	0
Ago4	0	0	0	0	0	0	0	0	0	0	0	1.10684	0	0	0
Ahr	0	0	1.11474	1.94945	1.9329	2.69336	3.43564	2.0898	4.85073	7.76355	7.60312	4.61368	9.65626	1.7801	5.38017
AI507597	0	0	0	0	0	0	1.89328	0	1.55749	1.55392	2.99489	1.93474	1.90882	0	0
AI661453	0	1.28562	1.2617	2.19869	4.04939	3.41171	5.4684	4.18789	3.69108	4.11945	3.43895	3.29801	2.9661	8.31091	3.64568
Aifm3	0	0	0	0	4.40526	6.00668	9.17928	2.43031	2.57401	2.37055	2.23692	2.24268	2.01871	1.0243	0
Ak3l2-ps	0	0	0	0	1.52069	1.22003	0	0	1.22866	2.31742	0	2.77977	0	0	0
Akr1c14	0	0	0	2.35881	3.35658	11.7273	10.9586	13.05	25.8704	38.2549	40.9335	46.5202	64.3379	24.2934	32.6512
Akr1c18	0	0	0	0	0	0	3.0138	15.7486	39.8436	37.1387	39.3163	49.1293	34.3792	0	0
Akr1c20	0	0	0	0	0	2.61253	5.49604	4.35684	34.2835	53.3723	76.1205	70.1466	117.94	34.4117	30.4735
Akr1d1	0	0	0	3.76222	5.97521	11.5237	16.2997	20.388	28.6068	45.3367	50.148	43.1027	63.0504	15.845	11.7629
Aldh1a1	0	0	0	0	0	0	1.10601	2.13386	3.51776	2.99852	4.57485	4.67596	57.1081	294.777	349.863
Aldh1a7	0	0	0	1.09523	0	1.01703	0	1.32638	1.79781	2.68457	8.28528	2.74831	35.3181	49.218	74.8868
Alpk1	0	0	0	0	0	0	0	0	0	0	0	0	0	0	1.83776
Amer2	0	0	0	0	0	0	0	1.24797	0	1.17273	1.32099	0	0	0	0
Amigo1	0	0	0	1.05808	0	0	2.51802	1.54977	1.46475	1.75398	1.89089	2.62714	2.02963	2.37611	1.32707
Amn	0	1.68266	0	0	0	0	0	0	0	0	0	0	0	0	0
Amy2a1	0	0	0	0	0	1.63277	1.12006	1.72575	0	0	0	0	9.7065	0	0
Amy2a2	0	0	0	0	0	1.59884	1.23628	1.94545	0	0	0	0	10.33	0	0
Amy2a3	0	0	0	0	0	3.04977	2.41874	3.36839	0	0	0	0	19.1569	0	0
Amy2a4	0	0	0	0	0	1.79999	1.44117	2.06589	0	0	0	0	11.5183	0	0
Amy2a5	0	0	0	0	0	2.67125	2.37602	3.73521	0	0	0	0	17.8155	0	0
Amy2b	0	0	0	0	0	1.22409	0	1.14714	0	0	0	0	6.23203	0	0
Angptl7	0	0	0	0	0	0	0	1.02071	0	0	0	0	0	0	0
Ankrd13d	0	0	0	0	0	0	1.35147	1.32962	0	0	0	0	0	0	0
Ankrd2	0	0	0	0	0	0	0	0	0	0	0	0	0	0	1.17655
Ankrd22	0	0	0	0	0	0	1.11855	0	0	0	0	0	0	0	0
Ankrd33b	0	0	0	0	0	0	0	0	0	1.21488	1.34709	0	1.49772	2.49088	3.37713
Ankrd44	0	0	0	1.10845	1.00067	1.08604	1.73058	2.08378	1.96369	1.55652	1.18521	0	0	0	0
Ankrd55	0	0	0	0	0	0	1.38285	3.97532	0	0	0	0	0	0	0
Ano9	0	0	0	0	1.21376	3.94767	2.53028	0	0	0	0	0	0	0	0
Anxa13	0	0	0	0	0	0	0	0	0	0	0	1.37382	0	0	0
Aoah	0	0	0	0	1.67062	1.05785	1.57856	1.63939	1.59388	2.22585	1.03567	0	0	0	0
Aox1	0	0	0	0	0	0	0	0	0	1.38072	1.50204	1.24178	9.09187	10.5634	8.40262
Aox3	0	0	0	0	2.66431	8.92659	14.7697	6.80842	15.8407	19.6048	21.4609	22.1278	37.4109	104.315	61.6106
Ap3m2	0	0	0	0	0	0	0	1.08336	1.23101	0	0	0	0	0	0
Apbb2	0	0	0	0	0	0	0	0	0	0	0	1.45184	0	0	0
Aph1b	0	0	0	0	0	0	1.04974	1.38755	1.00953	0	0	0	1.57852	0	0
Apobr	0	0	1.01794	1.15848	2.76999	2.37669	3.54613	3.5661	2.80342	3.00567	1.93537	0	0	0	0
Apol10b	0	0	0	0	0	0	0	0	0	0	0	0	0	0	4.63131
Apol7a	0	0	0	1.15246	3.87082	7.91328	9.35887	11.4281	15.2213	23.7424	22.5777	21.2056	23.2593	26.337	17.2028
Apol9a	0	0	0	0	0	0	0	0	1.45368	2.66294	2.92953	5.13915	11.019	87.016	52.5837
Apol9b	0	0	0	0	0	0	0	1.69762	2.27777	4.58239	6.85757	9.5968	22.8824	123.997	67.5552
Aqp4	0	0	0	0	0	0	0	0	0	3.32304	2.33513	3.45559	0	0	0
Aqp7	0	0	0	0	0	0	0	0	1.11951	1.43032	1.59001	2.80064	0	0	0
Arap2	0	0	0	0	0	0	1.54596	1.92811	1.58531	1.66037	1.52778	1.45895	1.71198	0	0
Arhgap26	0	0	0	1.03589	0	0	0	0	0	0	0	0	0	0	0
Arhgap42	0	0	0	0	0	0	0	0	1.59576	2.10142	1.71024	1.37464	2.23519	2.51359	2.68864
Arhgap44	0	0	0	0	0	0	0	0	1.07906	1.17189	0	0	0	0	0
Arhgef10l	0	2.58976	1.40218	2.78989	4.46835	4.86346	1.32092	1.76854	5.118	6.98043	1.68937	9.7181	6.80694	3.02112	7.36026
Arhgef26	0	0	0	0	0	1.09704	1.34717	0	0	0	1.0163	0	4.91934	2.89545	6.76059
Arhgef37	0	0	0	0	0	0	0	0	0	0	0	0	3.29414	0	0
Arhgef9	0	0	0	0	0	0	0	0	0	1.44746	1.17566	1.16749	0	0	0
Arid5a	0	0	0	0	1.3281	1.7572	2.52912	1.37895	0	0	0	0	0	0	2.30482
Arl11	0	0	1.0871	1.40015	1.79151	0	1.70194	1.45496	0	0	0	0	0	0	0
Arl9	0	0	0	0	0	1.0254	0	0	0	0	0	0	0	0	0
Arsg	0	0	0	0	1.21937	1.35842	2.02383	5.7291	9.2398	14.1064	12.5807	17.3696	5.13981	11.6374	7.3805
Art3	0	0	0	0	0	0	0	1.00368	0	0	0	1.43609	2.47744	0	0
Asah2	0	0	0	0	0	0	0	1.03811	1.81518	2.49124	2.34569	2.91257	2.83825	0	1.01737
Asb2	0	2.35175	2.33516	3.05938	3.64177	2.36326	3.30625	4.43059	4.39162	4.06227	3.69398	1.03633	0	1.14858	0
Aspa	0	0	0	1.22747	1.23803	2.01321	0	2.89335	3.98541	5.09641	5.72994	4.85103	2.8987	1.1578	1.43792
Aspg	0	0	0	0	0	1.21972	7.33637	5.85835	7.05339	6.57094	4.8578	31.4788	58.4301	57.6634	61.8945
Asprv1	0	0	0	0	2.73775	5.39876	7.49237	5.81802	1.5699	2.4104	1.05805	0	0	0	0
Atg9b	0	0	0	0	1.66751	2.7209	2.60527	0	0	0	0	0	0	0	0
Atp10d	0	0	0	0	0	0	0	0	0	0	0	1.15331	0	0	0
Atp1a3	0	0	0	1.15883	1.93811	0	1.59595	1.82	0	0	0	0	0	0	0
Atp4a	0	0	0	0	1.36128	1.61346	0	0	1.05054	0	0	0	0	1.66229	0
Atp6v0d2	0	0	0	0	0	0	0	0	0	0	0	1.06511	2.17669	0	0
Atp8a2	0	0	0	0	0	0	0	2.46577	0	1.55224	3.16742	0	0	0	0
Atp8b1	0	0	1.27168	1.72785	1.41438	2.53331	2.77921	2.35642	3.48059	4.2918	3.23519	4.16527	2.54825	2.74577	4.40048
Atp8b4	0	0	2.37287	2.30263	2.19678	1.52389	1.80446	1.24621	1.06027	0	0	0	0	0	0
Atxn1	0	0	1.52157	1.50353	1.63073	2.73114	1.86138	1.58671	1.58652	1.80093	1.81571	2.03122	2.06394	1.27918	2.20927
AU021092	0	0	0	0	0	0	0	0	1.44631	1.42004	0	0	0	0	0
AV099323	0	1.00685	1.63616	1.2749	0	0	0	0	0	0	0	0	0	0	0
Avpr1a	0	1.3704	2.37169	2.98198	1.84856	2.80923	6.32659	10.0042	9.43291	12.0738	10.3606	18.0063	25.3297	10.5717	12.6857
Avpr2	0	1.06266	1.22149	1.2425	1.63872	2.12534	2.11314	1.50082	1.23558	0	0	0	0	0	0
AW011738	0	0	0	0	0	0	2.79037	1.58757	2.60899	2.19382	1.52154	1.13122	1.09128	1.48469	1.33006
AW112010	0	0	0	0	1.42542	4.74608	11.1853	13.5538	18.9813	26.3018	25.111	42.7678	34.4616	38.6608	61.0081
Axin2	0	0	0	0	0	0	0	1.27119	1.67296	2.81483	3.03761	4.76233	2.38193	1.27253	1.69127
AY074887	0	0	0	0	0	0	0	0	0	0	1.44976	1.84106	0	0	0
B230206H07Rik	0	0	1.1728	1.77747	3.94039	3.94768	4.35161	3.57905	2.25842	3.12284	3.19693	5.3285	2.27282	8.0187	5.48292
B230206L02Rik	0	0	0	0	0	0	0	0	0	0	1.1176	1.03404	0	0	0
B230208H11Rik	0	0	0	1.00937	1.30174	2.88776	2.78563	3.17096	0	1.61324	1.14378	0	0	0	0
B230322F03Rik	0	1.23966	1.20965	0	0	0	1.83199	1.98598	1.05455	0	1.73203	2.49179	0	0	0
B3galt1	0	0	0	0	0	0	0	0	0	0	1.77882	1.39089	1.69878	1.71359	15.3008
B430119L08Rik	0	0	1.36457	3.06667	5.99954	7.13238	8.92052	10.2984	19.2581	19.1457	17.9179	16.3358	34.7359	73.835	65.4502
B430219N15Rik	0	0	0	0	0	0	0	0	0	0	0	0	0	1.28458	1.82467
B430306N03Rik	0	1.15456	1.01704	1.67393	2.15274	3.0124	2.51668	3.56624	2.19614	2.18436	1.82336	0	0	0	0
Baat	0	0	0	1.4498	1.99173	4.96321	8.80656	6.6924	7.08303	6.853	13.0766	12.5108	92.8893	94.1812	98.9473
Bace2	0	1.12477	1.10607	1.22763	1.882	1.23079	1.53525	2.63164	4.17763	5.37153	4.41297	3.59475	3.05222	1.26465	0
Bach2	0	0	0	0	0	0	0	0	1.27648	1.12732	0	2.30318	0	0	0
Bank1	0	0	1.021	1.17607	0	1.09223	1.73526	1.23619	1.87268	2.36725	1.45616	0	0	0	0
BB114351	0	0	0	0	0	0	0	0	0	0	0	0	1.16667	0	0
Bbox1	0	0	1.85923	2.48291	2.24599	2.79847	3.67475	8.47557	6.00954	12.6866	10.6586	26.7127	21.0304	11.8704	9.82888
Bbs1	0	0	1.15024	0	0	0	0	0	0	0	0	0	0	0	0
Bbs10	0	0	0	0	0	0	0	0	0	1.02098	1.07226	1.08282	0	0	0
BC016579	0	0	0	0	0	0	0	0	0	0	0	1.91578	1.42107	0	0
BC023105	0	0	0	0	0	0	0	3.84816	2.58856	5.73236	6.90465	9.47837	1.58651	0	2.43015
BC024139	0	0	0	0	0	0	0	0	0	0	0	0	2.23596	1.30266	0
BC024582	0	0	0	0	0	1.04634	1.15727	0	1.12192	1.32319	0	1.2028	0	0	0
BC048644	0	0	0	0	0	0	0	0	0	0	0	0	1.05428	0	0
BC049715	0	0	0	1.10835	0	0	0	0	0	0	0	0	0	0	0
BC065403	0	0	0	0	0	1.67305	0	0	0	0	0	0	0	0	0
Bcl2a1a	0	0	0	0	0	0	0	0	1.09639	0	0	0	0	0	0
Bcl2a1b	0	0	0	0	0	0	0	1.20913	2.86189	2.9379	2.8138	1.33665	1.24811	0	0
Bcl2a1d	0	0	0	0	0	0	0	0	0	1.3655	1.15694	0	0	0	0
Bcl2l15	0	0	1.08356	0	0	0	1.03487	0	0	0	0	0	0	0	0
Bcl6	0	0	0	0	0	0	0	0	0	0	0	0	4.9887	10.7683	15.3677
Bco2	0	0	0	0	0	1.00012	1.6513	1.27958	2.51933	3.68895	3.40045	6.89163	6.97213	9.36566	6.69018
Bdh2	0	0	0	0	0	0	0	0	0	1.07561	1.03569	0	1.41382	7.23978	2.97029
Bend7	0	0	0	1.10062	0	1.25572	1.57896	1.71321	1.32372	1.92711	1.78973	2.29031	2.36724	0	1.31503
Bfsp2	0	0	0	1.12558	4.07056	2.51435	3.33996	4.13627	1.21924	0	1.1403	0	0	0	0
Bhlha15	0	0	0	0	1.06382	1.60834	0	0	0	0	0	0	0	0	0
Bhmt-ps1	0	0	1.10711	1.08499	1.20456	1.88967	2.79899	7.6204	12.9707	14.9228	25.6889	6.07476	24.8754	15.6988	12.8702
Blk	0	0	0	0	0	0	1.68454	4.59195	2.2394	1.35581	1.00209	0	0	0	0
Blnk	0	0	0	0	1.12737	1.99439	1.9646	1.80034	2.27471	1.09068	1.1368	0	0	0	0
Bloc1s2-ps	0	0	1.15156	0	0	0	0	1.11124	1.10999	0	0	0	0	0	0
Bloodlinc	0	1.11413	0	0	1.05898	0	0	0	0	0	0	0	0	0	0
Bmp6	0	0	0	0	0	0	0	0	0	0	0	0	1.64747	0	0
Bst1	0	0	0	0	0	2.0013	1.81831	1.74456	1.10525	0	0	0	0	0	0
Btla	0	0	0	0	0	0	0	1.15351	1.11745	0	0	0	0	0	0
Btnl9	0	0	0	0	0	0	0	1.13042	1.02864	1.36244	1.35386	1.5419	1.75089	0	0
C030037D09Rik	0	0	0	0	0	1.06997	0	0	0	0	0	0	0	0	0
C130050O18Rik	0	0	0	0	1.45223	1.33927	1.07507	1.75277	1.11951	1.42248	0	0	0	0	0
C1ql4	0	0	0	0	0	0	0	0	0	0	0	0	0	0	1.43423
C1qtnf2	0	0	0	0	1.14087	0	1.27083	2.10832	2.04244	2.15939	2.47176	2.24984	1.69387	0	0
C1qtnf5	0	0	0	0	0	0	0	1.59542	1.60438	1.70971	1.79471	2.01203	3.23884	1.64331	2.19272
C1rb	0	0	1.12032	1.61342	2.63304	2.43574	3.32421	4.93564	7.05597	11.0724	6.38609	8.05441	7.36417	17.5437	12.0565
C230035I16Rik	0	0	0	0	0	0	0	1.1327	0	0	0	0	0	0	0
C2cd4d	0	0	0	0	0	0	0	0	0	0	0	0	0	2.1789	0
C330006D17Rik	0	0	0	0	0	1.09239	0	0	0	0	0	0	0	0	0
C330013E15Rik	0	0	0	0	0	0	0	0	0	0	0	1.21257	1.15356	1.54108	1.10135
C3ar1	0	0	0	0	0	0	0	0	1.13349	0	0	0	0	0	0
C430014B12Rik	0	0	0	0	0	0	0	0	0	0	0	0	0	1.51525	0
C4a	0	0	0	0	1.20007	1.46023	3.1405	2.82874	2.86864	2.93422	1.58307	1.86107	2.88501	8.1233	18.1475
C4bp	0	0	0	1.79903	1.50604	2.15641	3.78165	2.5888	23.0537	39.2247	46.8638	40.6393	121.901	143.013	189.515
C5ar1	0	0	0	0	1.03626	1.67808	2.19407	1.0944	1.23214	1.0207	0	0	0	0	0
C6	0	0	0	1.19921	2.30757	1.76865	0	2.84109	3.25579	3.6214	2.35633	0	2.7625	67.5223	110.376
C630043F03Rik	0	0	0	0	0	0	0	1.63504	1.10561	1.47971	1.02322	2.33617	2.08561	0	0
C730034F03Rik	0	0	0	0	0	1.02219	1.06868	0	0	0	0	1.71544	0	0	0
C9	0	0	1.0518	3.36007	4.23754	7.10461	1.41645	0	3.03927	8.18457	8.50309	11.2123	11.7397	240.486	346.247
C920021L13Rik	0	0	0	0	0	0	0	1.99695	0	1.03067	1.8011	1.08398	1.65274	1.01513	0
C920025E04Rik	0	0	0	0	0	0	0	0	1.16196	1.19153	1.07326	1.65453	0	1.48113	1.36738
Cables1	0	0	0	0	0	0	1.10445	0	0	0	0	1.61583	1.79632	0	0
Cabyr	0	0	0	0	0	0	0	0	0	0	0	0	1.33727	1.10833	3.00455
Cacna1a	0	0	0	0	0	0	1.14986	1.3158	0	0	1.0595	0	0	0	0
Cacna1b	0	0	0	0	0	0	0	0	0	0	0	1.01805	0	0	0
Cacng1	0	0	0	0	0	0	0	0	1.00608	1.80706	1.13048	0	0	0	0
Cadm3	0	0	0	0	0	0	0	0	0	1.37928	1.10121	1.80781	1.26496	1.09114	0
Cadm4	0	0	0	0	0	0	0	0	0	0	0	0	0	7.83547	7.95487
Cadps2	0	0	0	0	0	0	0	0	0	0	0	0	0	1.13889	1.80102
Calhm2	0	1.43641	0	0	1.42003	0	1.36403	1.5025	1.32255	1.43723	1.34264	0	0	0	0
Calml4	0	0	1.0608	0	0	0	1.88404	16.6844	14.5477	20.3703	21.1065	36.675	9.93866	0	0
Caln1	0	0	0	0	0	0	0	2.28311	0	2.28842	1.31046	5.67509	1.97682	0	0
Calr3	0	0	0	0	0	0	0	0	0	0	0	0	1.09519	0	0
Camk1d	0	0	0	0	0	1.28686	0	1.63777	2.0541	1.78983	0	1.19931	0	3.36042	1.02328
Camk2b	0	0	0	0	0	0	0	1.39768	0	0	0	1.2965	1.78512	1.06743	1.25937
Camk2d	0	0	0	1.32058	1.33807	1.97902	2.52941	2.20009	2.02753	2.85153	1.15609	0	0	0	0
Capn12	0	1.55413	0	0	1.14134	1.33932	0	1.364	1.4138	0	0	0	0	0	0
Capn3	0	0	0	0	1.07004	0	0	0	2.1286	2.57016	1.60242	3.48779	1.49952	0	0
Capn8	0	0	0	0	0	0	0	0	0	0	0	0	0	0	1.46135
Capsl	0	0	0	0	0	1.0346	0	0	0	0	1.23778	0	0	0	0
Car5a	0	0	1.0331	2.8937	5.81215	9.68714	10.2418	1.28061	9.15965	13.6439	23.915	6.34063	43.0203	46.8868	27.7271
Car7	0	1.01723	3.00507	2.43509	1.64803	0	0	0	1.30783	1.55383	1.05035	0	0	0	0
Car8	0	0	1.35804	2.58279	4.0355	5.04563	3.32634	2.73853	5.65879	8.0308	7.65893	11.4277	17.7116	10.2964	6.2922
Card6	0	0	0	1.1293	0	1.00416	1.24533	1.49383	1.57724	2.1522	1.51895	2.45521	2.032	1.98498	1.22737
Cask	0	0	1.24624	0	0	0	0	1.0694	1.19254	1.14327	1.02521	1.26695	1.42851	0	0
Casp4	0	0	0	0	0	0	1.12022	0	0	0	0	1.49935	0	0	0
Cav2	0	0	0	1.06683	0	0	1.29711	1.73137	1.55948	2.05103	1.71838	1.63112	0	0	0
Cblc	0	1.25607	0	1.49515	2.73775	2.49357	3.56635	6.49763	3.81001	7.19326	4.79919	15.4114	8.32251	13.4	9.69916
Cbr3	0	0	0	0	0	0	0	1.132	0	0	1.25413	0	1.18413	0	0
Ccdc120	0	1.00037	0	0	1.08159	0	1.31528	2.25494	1.36165	2.0296	2.30144	2.11884	1.16633	0	0
Ccdc122	0	0	1.24071	0	0	1.01362	1.20537	3.31119	2.33351	3.28092	3.89512	3.07436	3.02846	1.25237	2.05719
Ccdc141	0	0	0	0	0	0	0	0	1.04652	1.92755	2.06679	2.86387	2.0886	0	1.39194
Ccdc149	0	0	0	0	0	0	1.16641	1.26439	1.32461	1.39474	0	1.29715	1.30305	0	1.26292
Ccdc151	0	0	0	0	0	0	0	0	0	0	0	0	1.688	1.31315	0
Ccdc152	0	0	0	0	0	0	0	1.30507	1.02437	1.2237	1.27444	1.01374	2.16475	0	1.24469
Ccdc159	0	0	0	1.19834	1.07868	1.00026	1.6059	1.07484	1.04252	1.39968	1.61815	2.39601	2.82546	1.44078	2.21973
Ccdc162	0	0	0	0	0	0	0	0	0	1.19924	2.08704	1.53942	1.74407	2.80286	2.02712
Ccdc166	0	1.6457	0	0	0	0	1.24125	1.38054	0	1.15894	1.2691	1.24846	0	1.08642	0
Ccdc17	0	0	0	0	0	0	1.23936	1.55889	0	0	1.09309	1.38621	1.00691	0	1.17774
Ccdc30	0	0	0	0	0	0	0	0	1.66453	1.39113	1.61465	2.01867	1.87142	1.97081	1.52632
Ccdc41os1	0	0	1.00761	0	0	0	0	1.51868	0	0	0	0	0	0	0
Ccdc68	0	0	0	0	0	0	0	0	1.575	1.25544	1.96284	2.55282	2.10779	0	0
Ccdc69	0	0	0	0	0	0	1.33065	1.21249	0	0	0	0	0	0	0
Ccdc73	0	0	1.05812	1.10604	2.13789	1.1475	0	1.43768	0	0	1.03367	1.58027	1.14923	0	0
Ccl19	0	0	0	0	0	0	0	0	0	0	0	0	0	0	1.13539
Ccl19-ps3	0	0	0	0	0	0	0	0	0	0	0	0	0	0	1.03829
Ccl2	0	0	0	0	0	0	1.97883	0	1.77792	1.60488	1.73855	1.15799	0	0	0
Ccl22	0	0	0	0	0	0	0	0	0	1.33239	0	0	0	0	0
Ccl5	0	0	0	0	0	0	1.62122	4.12276	11.126	8.34257	7.05043	4.76606	3.77882	2.61203	1.05493
Ccnb1ip1	0	1.46589	0	0	0	0	0	0	0	0	0	0	0	0	0
Ccr1	0	0	0	0	1.38667	1.6593	1.1931	1.51033	0	0	0	0	0	0	0
Ccr2	0	0	1.67152	1.47752	1.19886	1.64219	0	1.6053	0	0	1.18901	0	0	0	0
Ccr5	0	0	0	0	1.10114	1.40029	1.57246	2.05548	4.23499	3.7958	3.69106	3.49618	1.31371	1.27857	1.44233
Ccr7	0	0	0	0	0	0	0	0	0	1.52166	0	0	0	0	0
Cd14	0	0	0	1.11828	1.30019	1.77375	1.73243	2.42268	2.73976	3.61816	2.09968	2.2364	2.02471	2.02264	2.44119
Cd160	0	0	0	0	0	0	0	0	0	1.2758	0	0	0	0	0
Cd163	0	0	0	0	0	0	0	1.26549	1.50074	1.77165	1.46087	1.4097	2.55388	2.25953	2.73043
Cd177	0	0	0	2.59257	11.1102	13.2941	16.1394	16.0611	8.69441	9.93296	5.60168	0	0	0	0
Cd180	0	0	0	1.00337	0	0	0	1.41845	1.86621	1.70192	1.64831	0	0	0	0
Cd19	0	0	0	1.23209	3.66826	6.63151	7.53389	9.12403	7.12909	3.83917	3.37357	1.08083	0	0	0
Cd1d2	0	0	0	0	0	0	0	0	0	0	0	1.17432	0	0	1.05283
Cd2	0	0	0	0	0	0	0	2.13658	1.70707	0	0	1.0953	0	0	0
Cd200	0	0	0	0	0	0	0	1.05857	0	0	0	0	1.20383	0	0
Cd207	0	0	0	0	0	0	0	0	0	0	0	0	0	0	1.2244
Cd209f	0	0	0	0	0	1.04418	3.14143	2.74814	6.14166	15.47	13.8114	6.2979	6.8263	0	0
Cd209g	0	0	0	0	0	0	0	0	0	2.93778	2.36719	1.81195	1.66609	0	0
Cd22	0	0	0	0	0	0	1.91318	2.16874	2.05255	1.27042	1.0055	0	0	0	0
Cd274	0	0	0	0	0	1.90753	3.19782	0	1.78694	1.89216	1.88142	1.03917	0	0	0
Cd300e	0	0	0	0	0	0	1.10118	0	0	1.21188	0	0	0	0	0
Cd300lb	0	0	0	0	0	0	1.05683	0	0	1.39829	0	0	0	0	0
Cd300ld	0	0	0	0	0	0	1.71642	2.61627	3.42898	5.65215	4.48313	3.54038	3.46018	2.38074	1.96702
Cd300lf	0	0	0	0	1.83612	3.59645	4.05216	4.19272	2.03327	2.45513	1.45473	0	0	0	0
Cd300lg	0	0	0	0	0	0	0	3.09054	2.99863	4.26553	4.17704	5.20375	4.74657	4.26139	2.56541
Cd33	0	0	0	1.09795	1.55563	1.75862	1.60036	2.06963	1.10149	1.22462	0	0	0	0	0
Cd3g	0	0	0	0	0	0	0	1.31347	2.76396	1.90521	2.09021	1.99409	1.24146	0	0
Cd4	0	0	0	0	0	0	0	0	0	0	0	0	0	1.01413	0
Cd40	0	0	0	0	0	0	0	1.4105	1.30436	1.1484	0	0	0	0	0
Cd7	0	0	0	0	0	0	0	1.48178	3.47365	3.59382	3.67433	1.93948	1.05451	0	0
Cd74	0	2.12105	1.71492	5.51184	6.75914	5.78179	6.6584	32.9463	48.7893	46.3862	40.2075	22.0734	27.2055	29.3726	28.0273
Cd79a	0	0	0	3.0528	8.79094	12.5856	15.605	20.6384	15.6102	9.7129	6.60232	2.9507	1.21442	0	0
Cd83	0	0	0	0	0	0	0	0	1.44831	2.39911	1.33629	1.90039	1.2649	0	0
Cdcp1	0	0	0	0	0	0	0	0	0	1.07969	1.11779	1.06575	1.58549	0	0
Cdhr5	0	0	0	0	0	0	0	0	1.63978	2.95556	4.29144	2.86416	16.0218	46.6092	36.4767
Ceacam1	0	0	1.68756	3.82733	7.76519	11.5296	13.8139	11.1733	14.8388	16.6761	17.5454	18.5959	27.6506	37.092	33.2491
Ceacam10	0	0	0	0	0	1.8164	1.6786	1.23944	0	0	0	0	0	0	0
Ceacam2	0	0	0	0	0	1.17113	1.39487	0	1.2197	1.26897	1.55798	2.00609	2.55001	3.42584	2.79382
Cela2a	0	0	0	0	0	0	0	0	0	0	0	1.09263	1.58882	1.18871	0
Celsr1	0	0	0	0	0	0	0	0	0	0	0	0	0	1.49155	0
Celsr2	0	1.08087	0	0	0	0	0	0	0	0	0	0	0	0	0
Cep85l	0	0	0	0	0	0	1.6464	0	1.8081	1.45693	0	0	3.99472	0	0
Ces1b	0	0	0	0	0	0	0	0	2.16487	6.49896	10.9192	6.46966	53.9985	20.2257	17.0022
Ces1e	0	0	0	2.94584	6.46979	5.69478	3.53309	4.53729	7.26451	12.2484	14.7482	10.6243	19.921	55.5229	16.0636
Ces1f	0	0	0	0	0	0	0	0	1.54089	2.95536	1.36452	2.94851	5.21786	133.377	60.1088
Ces1g	0	0	1.37004	3.42629	6.11358	3.15407	2.12088	6.53734	8.37227	25.7876	38.8705	10.4088	127.964	54.5257	15.3438
Ces2b	0	0	0	0	0	0	0	0	0	0	0	0	0	1.34688	0
Ces2c	0	0	0	0	0	0	0	1.36991	1.71227	1.57672	1.31125	1.36638	0	26.0167	21.5866
Ces2d-ps	0	0	0	0	0	0	0	0	0	0	0	0	0	11.1484	9.21056
Ces2e	0	0	0	1.61203	2.2006	1.77551	5.23067	9.97684	28.2062	61.562	62.2838	111.965	38.4552	72.3752	30.0933
Ces3b	0	0	0	0	0	0	0	0	0	0	0	0	1.98757	300.747	133.465
Ces4a	0	0	0	0	0	0	0	0	0	0	0	0	0	11.3808	2.21479
Cfhr1	0	0	0	0	1.07193	1.91835	4.28783	11.9451	13.4938	18.5316	21.138	20.4584	30.4044	32.702	38.0933
Cfhr2	0	0	1.684	5.68599	9.35861	22.3938	41.2398	52.9079	64.0724	79.7304	80.5136	98.8539	153.566	136.151	179.799
Cfhr3	0	0	0	0	0	0	0	0	0	1.4577	1.55027	1.34274	3.43843	4.50969	7.58852
Chac1	0	0	0	0	0	0	0	0	0	0	0	1.17791	2.13859	2.33575	2.66535
Chadl	0	0	0	0	0	0	0	0	0	0	1.27327	0	0	0	0
Chdh	0	0	2.76286	4.9053	11.2336	14.926	13.1836	8.82817	19.6216	28.7289	30.6615	30.1404	19.2558	14.9137	14.8914
Chga	0	1.32795	1.89429	3.31312	1.66104	1.30081	0	0	0	0	0	0	0	0	0
Chml	0	0	1.07858	0	0	0	0	0	0	0	0	0	0	0	0
Chmp4c	0	0	1.28559	1.47174	1.14993	2.04653	1.95886	1.08734	1.53521	1.68673	0	1.42894	0	0	0
Chp2	0	1.00111	0	2.00832	2.59799	4.09975	2.51216	1.75794	2.89957	3.28476	2.96113	1.94833	1.37614	1.26222	0
Chpt1	0	0	0	1.56345	1.10547	1.21863	1.19225	1.69766	2.01494	3.61726	3.0514	8.19848	11.0199	20.087	19.6219
Chrd	0	0	0	0	0	0	0	1.52702	0	0	1.3205	0	1.80139	1.91377	2.39908
Chrna2	0	0	0	0	0	0	0	2.26913	0	2.87388	1.41247	3.64402	0	1.42302	0
Chrna4	0	0	0	0	0	1.86841	2.72033	0	0	0	0	0	0	0	0
Chst3	0	0	0	0	0	1.34491	1.67915	4.25122	1.83243	0	0	0	0	0	0
Chsy3	0	0	0	0	0	0	1.61609	0	1.59415	3.14547	1.09125	1.44522	0	0	0
Cidec	0	0	0	0	0	0	0	8.29428	0	0	1.39624	10.2556	0	0	0
Ckmt1	0	0	0	0	0	0	0	0	0	1.28972	0	0	0	0	0
Cldn14	0	0	0	1.74439	2.7258	3.34002	4.65742	6.0825	7.81693	8.16173	8.5222	8.78231	5.5987	8.35822	14.0836
Cldn2	0	0	0	0	0	0	0	1.77379	7.53882	39.3715	14.0303	16.9998	7.80675	7.76949	7.28812
Cldn4	0	0	0	0	0	0	0	0	0	1.00532	0	0	0	0	0
Cldn6	0	0	0	0	0	1.18912	0	0	0	1.1596	1.56717	1.44433	0	0	0
Cldnd2	0	0	0	0	0	0	1.75295	0	0	0	0	0	0	0	0
Clec11a	0	0	0	0	0	0	0	1.13871	1.22689	1.2311	1.19496	1.79639	1.33554	0	0
Clec2h	0	0	0	0	0	0	1.1174	0	7.82538	9.79653	9.66172	1.24025	0	3.13307	0
Clec3b	0	0	0	0	0	0	0	1.07854	0	0	0	0	0	0	0
Clec4a2	0	0	1.90269	2.72963	3.25475	3.62349	4.5674	4.35695	2.70144	2.78233	1.37581	0	0	0	0
Clec4a3	0	0	1.05873	1.66295	1.82597	2.71139	2.25502	1.83682	1.89577	2.53044	1.89592	2.35786	0	1.05049	1.11988
Clec4d	0	0	0	0	0	0	1.3222	0	0	0	0	0	0	0	0
Clec5a	0	0	1.10912	2.39482	1.09769	2.90524	1.78766	2.34541	0	0	0	0	0	0	0
Clec9a	0	0	0	0	0	1.84068	1.01209	1.3035	1.59577	1.77313	1.73542	1.26942	0	0	0
Clic3	0	0	0	0	0	0	0	0	0	0	0	0	0	1.75955	1.21189
Clic5	0	0	0	0	0	0	0	0	1.20491	1.02036	1.02458	0	0	0	0
Clmn	0	0	0	0	0	1.01421	1.50011	2.27506	3.45471	4.08579	3.66373	7.87396	4.02662	5.21924	4.54183
Clps	0	0	1.25547	1.00088	0	0	0	1.15739	0	0	0	0	0	0	0
Cma1	0	0	0	0	0	0	0	1.74876	1.35079	0	0	0	0	0	0
Cmah	0	0	0	0	0	0	0	0	1.48548	3.36162	1.60679	1.45234	3.27331	6.15306	7.71617
Cmbl	0	1.31374	1.2715	3.30268	6.00422	8.36512	17.5517	17.261	27.3896	33.3415	46.5639	33.626	22.4671	49.8316	24.2745
Cmklr1	0	1.5526	0	1.31479	1.46434	1.55357	1.7701	1.89434	1.77378	2.29141	1.48063	0	0	0	0
Cnbd2	0	1.29968	1.20749	1.19873	2.61058	1.83076	1.86593	3.05055	1.8648	1.6289	1.41992	1.51968	2.11824	1.3037	2.19823
Cnn1	0	0	0	0	0	0	0	0	0	1.0083	0	0	0	0	0
Cntd1	0	0	0	0	0	1.17323	0	0	0	0	0	0	0	0	0
Cntln	0	0	1.053	1.11258	0	0	0	0	1.00544	1.01323	1.1252	1.17872	0	0	0
Cntn3	0	0	1.12209	1.22245	0	0	0	0	0	0	0	0	0	0	0
Cntnap1	0	0	0	0	0	0	0	1.47965	0	1.16259	0	1.32994	0	0	0
Cobl	0	0	0	0	0	0	0	0	1.38222	1.373	0	1.16816	1.5513	1.13542	1.65738
Col11a1	0	0	0	1.04642	0	0	0	0	0	0	0	0	0	0	0
Col15a1	0	0	0	0	0	0	0	0	0	0	0	0	0	0	1.12411
Col4a5	0	0	0	0	0	0	0	0	0	1.13191	0	2.05564	0	0	0
Col5a3	0	0	0	0	0	0	1.72052	1.98109	1.82458	2.04437	2.53774	1.63929	1.97373	4.35369	8.09573
Col9a3	0	0	0	0	0	0	0	0	0	0	1.14327	0	0	0	0
Comp	0	0	0	0	1.07954	1.76487	6.58172	1.99558	0	0	0	0	0	0	0
Cox4i2	0	1.18679	0	0	0	0	0	0	0	0	1.26669	0	0	0	0
Cpeb2	0	0	1.01095	1.26061	1.1231	1.83024	2.33512	2.90441	2.36686	3.70151	3.92148	4.89619	3.67726	2.55097	4.18023
Cpeb3	0	0	0	0	0	0	0	0	1.10355	0	0	0	0	0	0
Cplx2	0	0	0	1.20705	1.79286	2.62881	2.52577	3.08803	1.97063	1.55818	1.8134	1.03356	0	0	0
Cpne8	0	0	0	0	0	0	0	0	0	1.08106	1.27253	1.65798	1.8186	2.99886	8.57206
Cpsf4l	0	0	0	0	0	0	0	0	0	0	0	0	2.12333	0	0
Cpz	0	1.25105	0	0	0	0	0	1.43806	1.1968	1.40528	1.77154	1.19823	1.06492	0	0
Crebrf	0	0	0	1.22306	0	1.55719	1.4691	1.54948	1.10076	1.81607	1.05097	4.39943	2.40667	0	1.45016
Crispld2	0	0	0	0	1.56642	0	0	1.08819	0	0	0	0	0	0	0
Cryba4	0	0	0	0	0	0	1.5218	0	0	0	1.25817	0	0	0	0
Crybb3	0	0	0	0	0	0	0	0	0	0	0	0	0	5.56411	13.2778
Crygn	0	0	0	0	0	0	0	0	0	0	0	0	0	3.40709	1.92867
Crym	0	0	0	0	0	0	0	0	0	0	0	1.16469	1.05173	0	0
Csrp3	0	0	0	0	0	0	0	0	0	1.10647	1.08005	3.03937	10.7534	16.8682	19.8747
Cst8	0	0	0	0	0	0	0	1.24213	1.76438	0	1.08119	0	0	0	0
Ctrb1	0	0	0	0	0	0	0	5.23381	0	0	0	0	0	0	0
Ctsw	0	0	0	0	0	0	0	0	1.30463	1.97785	2.02406	1.28779	0	0	0
Cul9	0	0	0	0	0	0	1.33662	1.43079	1.34243	1.75735	1.78126	2.26322	1.45669	0	0
Cux2	0	0	0	1.19922	0	0	8.58422	5.59929	3.7163	1.11884	4.33195	9.46456	5.21426	0	0
Cxcl1	0	0	1.64904	1.84756	1.48838	1.70997	1.37581	0	4.82372	2.91146	3.44534	3.08125	5.82193	8.68191	68.1725
Cxcl13	0	0	0	0	0	0	0	0	0	0	0	0	0	0	1.47575
Cxcl14	0	0	0	0	0	0	0	0	0	0	0	0	0	0	2.1872
Cxcl16	0	0	0	0	1.03377	1.47239	2.8883	4.60646	3.99929	6.58562	3.64506	2.92906	2.65066	2.86544	2.8972
Cxcl9	0	0	0	0	0	0	0	0	1.13863	1.93223	2.54362	0	1.39212	1.89914	6.34126
Cxcr2	0	0	0	0	1.02181	2.19649	2.16417	1.70494	0	0	0	0	0	0	0
Cxcr3	0	0	0	0	0	0	0	0	0	1.05107	0	0	0	0	0
Cyb561	0	0	1.09842	0	0	0	0	0	1.07382	0	0	0	1.73823	3.29493	7.59984
Cygb	0	0	0	0	1.10685	1.41536	0	2.90158	3.93059	4.27862	3.17787	4.09982	3.57353	2.33487	2.68192
Cym	0	0	0	0	0	0	3.3991	3.42001	1.53094	2.29679	1.61081	0	0	0	0
Cyp17a1	0	0	0	0	0	1.90779	1.60924	0	1.90615	0	1.06313	0	16.2745	1.25064	3.96381
Cyp1a1	0	0	0	0	0	0	0	0	0	0	0	0	1.07027	0	0
Cyp1a2	0	0	0	0	0	0	0	24.6175	70.8061	64.6773	135.216	50.4966	626.966	514.815	226.762
Cyp21a2-ps	0	0	0	0	0	0	1.43346	0	0	0	0	0	2.22659	3.09279	18.6538
Cyp26a1	0	0	0	0	0	0	0	0	0	0	0	0	0	9.01965	1.60497
Cyp26b1	0	0	0	0	0	0	0	0	0	1.31943	0	1.03669	0	0	0
Cyp2a22	0	0	0	0	1.36066	2.54377	3.00269	11.172	30.5028	45.442	59.6311	51.8203	118.332	1.62741	1.08654
Cyp2a4	0	0	0	0	0	0	9.00145	4.8563	2.82121	1.23031	1.10602	3.27035	3.19588	2.64524	0
Cyp2a5	0	0	0	1.03305	2.27552	3.84632	6.27291	3.39776	3.21154	3.95202	3.38352	5.82611	113.613	68.0894	35.1225
Cyp2b10	0	0	0	0	0	0	0	2.61087	0	0	0	0	0	0	0
Cyp2b13	0	0	0	0	0	0	0	1.12805	1.86276	3.79995	5.07614	9.63048	15.6842	0	0
Cyp2b9	0	0	0	0	1.08819	2.22359	1.69951	33.3733	72.4694	104.83	115.707	114.5	98.0237	0	0
Cyp2c38	0	0	0	0	0	0	0	0	0	0	0	0	0	2.23833	1.93079
Cyp2c39	0	0	0	0	0	0	0	0	0	0	0	0	1.20009	0	0
Cyp2c50	0	0	0	0	0	0	0	2.20603	3.28607	14.7939	19.733	64.1143	459.304	198.705	73.5898
Cyp2c54	0	0	0	0	0	0	1.80033	3.53131	3.66849	8.81639	7.86503	6.91761	58.7345	72.2134	23.2535
Cyp2c55	0	0	0	0	0	0	0	0	0	0	0	1.26439	12.56	5.12218	2.27784
Cyp2c67	0	0	0	1.05645	0	1.53773	17.202	8.25646	11.7095	13.4953	10.8977	39.4865	15.9011	113.44	170.929
Cyp2c69	0	0	0	0	0	2.86333	167.674	20.562	56.7273	25.3516	18.8943	22.6682	22.639	18.2316	6.58595
Cyp2d11	0	0	0	0	0	0	2.31033	3.92434	2.73946	3.60424	3.54617	3.10119	4.50616	13.0653	6.95874
Cyp2d12	0	0	0	0	0	0	0	0	0	0	0	0	0	1.78923	0
Cyp2d34	0	0	0	0	0	0	0	0	0	0	0	0	0	1.22884	0
Cyp2d37-ps	0	0	1.77366	3.5535	4.22588	6.62042	25.766	25.9304	42.8977	49.0508	57.3809	78.6791	45.1205	18.2361	35.0868
Cyp2d40	0	0	0	0	0	0	0	1.67256	4.29057	7.21778	8.087	12.752	15.42	158.499	124.366
Cyp2f2	0	0	0	1.41785	2.39215	5.12669	19.4727	21.5596	48.4451	23.4116	21.7803	4.5775	161.145	1002.37	538.619
Cyp2g1	0	0	0	0	0	0	0	0	0	0	1.53224	0	1.57921	0	0
Cyp2j5	0	0	0	0	0	1.10483	9.0324	10.011	26.2567	37.5118	48.2187	20.7848	48.2979	89.9679	128.304
Cyp2j6	0	0	0	0	0	1.27794	3.57235	3.53792	4.32933	6.09209	6.01417	7.42147	8.12874	7.35076	9.70694
Cyp2j9	0	0	0	0	0	0	0	2.09775	0	1.04367	1.48866	1.90708	3.59096	0	2.59565
Cyp2r1	0	0	0	0	0	0	0	0	0	2.06443	1.60165	1.22609	4.74579	3.48324	5.45554
Cyp2s1	0	0	0	0	0	0	0	1.04283	0	0	0	0	0	0	0
Cyp2u1	0	0	0	0	0	0	0	0	0	0	0	0	0	14.5195	5.88622
Cyp39a1	0	0	1.78127	2.74845	4.94747	10.0805	25.1457	37.2018	12.687	11.6511	9.25714	31.7344	48.5421	2.90748	2.97723
Cyp3a13	0	0	1.06584	1.96843	1.9616	5.84682	14.7361	30.3868	13.1469	16.1731	12.128	23.6225	44.3609	30.513	50.5918
Cyp3a25	0	0	0	0	0	0	14.523	126.315	29.1507	53.9199	56.4079	91.8602	142.05	73.8172	71.6689
Cyp3a41a	0	0	0	0	0	0	11.1389	54.7076	54.0661	65.962	82.573	9.15473	0	0	0
Cyp3a41b	0	0	0	0	0	0	9.6483	48.2462	47.9495	56.8567	74.9494	8.92915	0	0	2.31649
Cyp3a44	0	0	0	0	0	1.01761	3.56652	76.9048	80.8825	85.2225	90.6105	65.6371	3.03203	0	0
Cyp3a57	0	0	0	0	0	0	0	0	0	0	0	1.22082	0	0	0
Cyp3a59	0	0	0	0	0	0	0	12.8236	4.031	10.6802	8.36726	24.0694	32.9232	5.16603	2.90386
Cyp4a12a	0	0	0	0	0	0	4.1798	1.09805	0	0	0	0	0	138.981	83.503
Cyp4a12b	0	0	0	0	0	0	0	0	0	0	0	0	0	45.0495	22.0512
Cyp4a31	0	0	0	0	0	2.19948	6.26331	86.5619	33.0553	44.2053	43.569	98.1424	14.5297	1.00523	0
Cyp4a32	0	0	0	0	0	0	2.36084	11.7992	1.41779	4.6998	5.14404	39.7319	8.90187	5.27496	4.50584
Cyp4b1	0	0	0	0	1.89382	1.97803	3.84011	6.52212	5.84108	6.548	5.49796	5.51108	5.61909	6.36847	3.94473
Cyp4f14	0	0	0	0	0	0	0	0	5.18895	10.063	17.8398	1.18404	113.114	167.203	79.1977
Cyp4f17	0	0	0	0	0	0	2.30232	4.41434	1.85812	2.94288	3.08496	5.46208	3.73701	3.82951	5.218
Cyp4f18	0	0	0	1.6153	2.34275	2.88544	2.98287	3.33679	1.47663	1.65511	0	0	0	0	0
Cyp4f39	0	0	0	0	0	0	0	0	1.05667	0	1.22969	0	0	0	0
Cyp7a1	0	0	0	0	0	4.22081	10.3198	3.40516	6.28478	7.68775	18.5262	2.45181	64.7018	4.15127	2.93506
Cyp7b1	0	0	0	0	0	0	0	0	0	0	0	1.12326	2.85039	116.256	240.255
Cyp8b1	0	1.17457	1.10849	1.50812	11.1358	18.3879	48.0418	61.2758	77.9085	115.779	221.325	63.6376	147.096	204.497	110.025
Cys1	0	1.26266	1.14509	1.05096	2.41981	1.38109	0	0	0	1.70455	0	1.05726	1.02102	1.46695	0
Cystm1	0	1.59545	1.21187	1.58892	4.71433	5.69485	7.90829	3.99447	2.67197	2.64911	3.73331	3.03482	2.71716	4.37281	3.6308
Cytip	0	0	0	0	0	0	0	1.38026	0	0	0	0	0	0	0
D130043K22Rik	0	0	0	0	0	0	0	0	0	0	0	1.14773	1.13583	0	0
D330023K18Rik	0	0	0	0	0	0	0	1.53646	0	1.6834	1.76513	1.67367	1.10379	1.38356	0
D430042O09Rik	0	0	1.59298	0	0	0	0	1.16925	0	0	0	0	0	0	2.37067
D630002J18Rik	0	0	0	1.48177	0	0	0	0	0	0	0	0	0	0	0
D630003M21Rik	0	0	0	0	0	0	0	0	1.0665	2.29891	1.94072	1.2945	1.18073	0	0
D630033O11Rik	0	0	0	0	0	0	0	1.27154	0	1.19197	0	0	1.35684	0	0
D630039A03Rik	0	0	0	0	0	0	1.12504	1.24396	2.0332	4.42604	4.68814	4.31951	6.34954	4.27185	2.82854
D630045J12Rik	0	0	0	0	0	0	0	0	0	0	0	1.55599	0	0	0
D930048N14Rik	0	0	0	0	0	0	0	0	1.14716	1.07591	1.03277	0	1.72831	0	1.14922
Dclk3	0	0	0	0	0	0	0	0	1.13847	1.85309	1.81951	3.04108	1.48294	2.0447	0
Dct	0	0	0	0	0	0	1.09159	0	0	0	0	0	0	1.37102	0
Dcun1d3	0	0	1.18108	0	0	0	1.77473	1.36971	0	1.00759	1.07253	1.07704	1.0258	0	1.33404
Ddo	0	0	0	0	0	0	0	0	0	1.00875	1.40854	4.86742	1.60887	2.63247	2.44355
Ddx58	0	1.20915	1.82533	2.69984	2.39604	3.91248	7.81045	5.07206	6.34889	8.30466	7.16532	5.4189	5.73665	4.57928	5.15895
Defb1	0	0	0	0	1.27363	5.30674	12.3082	24.4749	16.4105	20.7321	19.8022	48.3034	14.5633	0	0
Dennd3	0	0	0	0	1.02689	1.66381	1.06545	1.40857	0	0	0	1.73139	0	0	0
Derl3	0	0	0	0	0	0	0	1.17308	0	0	0	0	0	15.6574	8.77055
Dhtkd1	0	1.11219	1.00554	2.8071	4.46913	2.36889	2.85913	5.62463	4.97046	8.83445	6.16515	8.84775	10.9518	3.0042	2.6215
Dio1	0	0	0	0	0	0	0	1.98319	7.30874	8.36251	11.3741	30.0146	48.4971	57.2752	45.1243
Dio3	0	0	0	0	0	0	0	0	0	0	0	3.11513	0	0	0
Dio3os	0	0	0	0	1.00321	1.36596	1.64338	3.93462	2.89409	4.52568	2.06979	17.4905	1.6599	0	0
Dip2c	0	0	0	0	0	0	0	0	0	1.4809	1.08064	1.09526	1.0147	0	0
Dixdc1	0	0	0	0	0	0	1.76994	0	0	1.74062	1.0506	4.006	1.52976	0	1.02229
Dkkl1	0	1.4104	2.12091	1.18376	0	0	0	0	0	0	0	0	0	0	0
Dlgap3	0	0	0	0	1.05465	0	0	0	0	0	0	0	0	0	0
Dll1	0	0	0	1.03021	0	1.05347	1.5076	3.19891	2.15387	2.88609	2.22469	1.97612	2.38	0	0
Dmbt1	0	0	0	0	0	0	0	0	1.27893	2.67517	0	0	0	0	0
Dmxl2	0	0	0	0	0	0	0	0	0	0	0	0	0	0	1.0322
Dnah17	0	0	0	0	0	0	2.23251	0	0	0	0	0	0	0	0
Dnaic1	0	0	0	0	0	1.37122	1.36135	2.24254	7.90196	8.57335	9.5895	5.679	3.73562	1.70664	2.63984
Dnaic2	0	0	0	0	1.0108	1.08452	3.03607	0	0	0	0	0	0	0	0
Dnajc28	0	0	0	0	0	0	0	2.0899	1.17794	1.89463	1.32258	2.32938	2.45353	1.55135	1.75844
Dnase1l3	0	1.08579	1.20409	1.69679	2.84546	2.89164	5.34198	6.70989	10.7908	14.0875	12.0451	11.9341	8.51942	10.1156	4.93494
Dnase2b	0	0	0	1.14783	1.55364	3.18068	2.70257	1.68923	2.61145	3.99614	3.53304	6.4832	5.57042	4.8128	4.28125
Dock2	0	0	0	1.72587	0	0	1.74588	0	1.97155	1.19191	0	0	0	0	0
Dock4	0	0	0	0	0	0	0	0	0	1.51075	1.14209	1.60784	1.54363	0	1.31529
Dpf3	0	1.11118	1.80931	0	0	2.17571	0	0	1.05109	0	0	1.26519	0	0	0
Dpt	0	0	0	0	0	0	0	1.15162	1.73999	4.04362	2.16061	1.97997	1.55007	1.35783	1.89936
Dram1	0	0	0	0	1.61464	2.47016	7.20629	2.61631	1.44274	1.9027	1.15624	0	0	0	0
Drc1	0	0	1.17649	0	0	0	0	0	0	0	0	0	0	0	0
Dsg1c	0	0	0	0	0	0	0	0	0	0	0	3.72384	2.25123	0	0
Dusp14	0	0	0	0	0	1.11074	0	0	1.00482	0	1.24931	0	1.24084	0	0
Dysf	0	0	0	0	1.02079	0	0	1.2287	0	1.78462	0	0	0	0	0
E030018B13Rik	0	0	0	0	0	0	0	0	0	0	0	0	0	0	1.05884
E030030I06Rik	0	0	0	0	1.42714	1.39933	0	1.81532	3.00797	2.84202	2.15363	1.53815	1.6821	0	0
E130102H24Rik	0	0	0	0	0	1.27476	0	0	1.08988	0	1.31191	3.04549	2.96739	0	2.83094
E130215H24Rik	0	1.3773	0	0	0	0	0	0	0	0	0	0	0	0	0
E130311K13Rik	0	0	1.06096	0	0	1.00364	1.06761	1.51366	1.88131	2.44787	2.91362	3.05357	2.85696	1.90366	1.66755
E230001N04Rik	0	0	0	0	0	0	0	1.13001	0	0	0	0	1.46184	0	0
E230013L22Rik	0	0	0	0	0	0	0	0	0	1.20391	1.32224	1.47453	0	0	0
E330009J07Rik	0	0	0	0	0	1.84967	1.85749	1.82495	1.17538	1.36795	1.14793	2.10002	1.62258	0	0
E430018J23Rik	0	1.5674	1.01812	1.05893	0	1.13066	1.01955	1.52322	0	1.2003	1.37934	1.4404	1.62405	1.78155	1.5502
Ebf1	0	0	0	0	1.37302	4.71515	2.8687	2.399	0	0	0	0	0	0	0
Efna3	0	0	0	0	0	1.29566	0	0	0	0	0	0	0	0	1.55875
Egfl8	0	0	0	0	0	1.14357	0	1.09532	0	0	0	0	0	0	0
Egfr	0	0	0	0	0	1.80499	12.437	14.1079	6.32648	6.38672	6.93987	8.46999	13.1166	70.9467	75.0994
Eif3s6-ps2	0	0	1.49348	1.10555	0	0	0	0	0	0	0	0	0	0	0
Elf3	0	1.06052	1.02376	0	0	0	0	0	1.22416	1.64919	1.30891	0	0	0	1.23608
Elovl3	0	0	0	0	0	0	0	0	0	0	0	0	0	344.673	285.649
Elovl7	0	0	0	0	0	0	1.1936	0	0	0	0	0	0	0	0
Emp1	0	0	0	1.79315	1.63176	1.84868	0	1.22126	2.64674	3.35649	3.01199	2.05833	1.32779	0	0
Enpp1	0	0	0	0	0	0	0	0	1.2314	1.72987	1.05474	2.51815	3.26743	1.2491	1.45106
Enpp2	0	0	1.60808	4.72654	6.80925	15.2505	18.5596	7.80974	20.4313	26.9228	24.0996	27.0342	21.7845	5.98633	6.31802
Enpp3	0	1.45451	2.73787	3.41671	4.17871	1.82403	1.34811	2.63264	4.28703	9.3231	5.57827	18.006	5.95111	12.7421	16.6875
Entpd2	0	0	0	0	0	1.86835	6.77886	1.9436	1.67889	2.0041	1.97332	3.73446	2.13536	2.88643	1.68514
Entpd8	0	1.01581	1.58072	3.56235	3.56387	4.61318	16.4254	19.4902	14.9664	20.5748	20.5077	31.2783	28.5773	32.8913	25.0281
Epcam	0	0	0	0	0	1.56749	0	1.89116	2.40181	2.44898	2.52566	2.5175	1.12078	0	0
Epm2a	0	0	0	0	0	0	0	0	0	0	0	0	0	1.11067	0
Eps8	0	0	0	0	0	0	0	0	0	1.08317	0	0	0	0	0
Eps8l1	0	1.26918	1.61995	0	1.62699	2.31073	1.58657	0	1.05687	0	0	0	0	0	0
Epsti1	0	0	1.12811	1.88439	1.38786	2.19537	5.03458	5.13135	4.58104	4.97066	4.49081	3.29501	1.97811	1.4461	1.19975
Erbb3	0	1.56241	1.53871	2.74376	3.35917	4.35023	8.23686	7.49889	8.20392	10.6694	7.32149	20.6557	15.7488	11.7649	12.6168
Erc2	0	0	0	0	0	0	0	0	0	0	0	0	0	0	1.42558
Ero1lb	0	0	0	1.02123	1.16853	2.03274	3.10192	3.07774	4.02516	3.48729	2.81495	3.54397	4.75017	12.7813	15.4496
Esr1	0	0	0	0	0	0	0	0	1.05681	1.92982	2.20586	0	4.54528	0	2.11192
Etnppl	0	0	0	0	0	3.30115	9.00896	12.5835	26.5671	28.5461	32.4288	14.7637	38.0542	16.8318	9.15899
Extl1	0	0	0	0	0	0	0	0	0	0	0	0	0	2.12279	1.22163
F2rl1	0	0	0	0	0	1.04892	1.15145	0	0	0	0	0	0	0	0
F3	0	0	0	0	0	0	0	0	0	1.45496	1.317	1.82499	0	0	0
F630028O10Rik	0	1.31686	2.68157	3.45174	4.56262	6.74802	5.42156	5.55294	2.88989	2.66497	1.85238	0	0	0	0
F8	0	0	0	0	0	0	0	0	1.06608	1.90051	1.36913	0	0	0	0
F830016B08Rik	0	0	0	0	0	0	0	0	0	0	0	0	0	0	1.01367
F9	0	0	1.06705	2.58611	1.87706	6.41524	9.84694	11.6083	14.2586	24.408	23.0777	29.7272	40.6095	24.0178	46.9375
Fa2h	0	0	0	0	0	0	0	0	0	0	0	1.28239	0	0	0
Fabp12	0	0	0	0	0	1.24972	2.73283	0	0	0	0	0	0	0	0
Fabp7	0	0	0	0	0	0	0	2.43346	2.29428	3.09603	3.45205	3.98544	6.05141	1.23464	3.20057
Fam110c	0	0	0	1.19305	1.76492	2.09179	2.26072	4.09621	2.78136	2.50251	1.86451	1.86239	1.31008	0	0
Fam126b	0	0	0	0	0	1.45481	0	0	0	0	0	1.21337	0	0	0
Fam129a	0	1.28995	1.89277	2.54101	6.01771	7.12776	6.58697	3.81613	4.88965	4.1702	3.23816	2.05922	0	0	0
Fam131c	0	0	0	0	0	0	0	1.50671	0	2.55729	4.22087	2.73427	1.70157	2.46579	1.864
Fam13a	0	0	0	0	0	1.35414	1.12927	0	0	0	0	1.3577	3.11135	0	0
Fam151a	0	1.23604	1.03556	0	0	0	0	0	0	0	0	0	0	0	0
Fam160a1	0	0	0	0	0	0	0	0	0	0	0	0	0	0	1.24389
Fam161a	0	0	0	0	0	0	2.61403	0	1.10966	0	0	1.5513	0	0	0
Fam161b	0	0	1.13192	0	0	0	0	0	0	0	0	0	0	0	0
Fam167a	0	0	0	0	0	0	0	1.64558	1.30046	1.64091	1.09221	0	0	0	0
Fam180a	0	0	0	0	0	0	0	0	0	0	0	0	1.04601	0	0
Fam187b	0	1.19031	1.33981	0	0	1.50262	2.32804	0	2.28696	1.78604	2.53097	1.99984	3.24228	1.38247	3.40821
Fam214a	0	0	0	0	0	0	0	0	1.56136	1.82929	1.00171	2.49787	4.74385	2.104	2.69731
Fam220-ps	0	0	1.13492	0	0	0	0	0	0	0	0	0	0	0	0
Fam221a	0	0	0	0	0	0	0	1.23737	0	0	0	0	0	0	0
Fam229a	0	0	0	1.09853	0	2.26177	1.8435	0	0	0	0	0	0	0	0
Fam25c	0	0	0	0	0	1.04651	1.49468	3.51248	8.67402	11.3688	19.0352	9.73412	15.9412	131.677	109.516
Fam47e	0	0	0	1.36444	1.8214	4.89795	5.99315	0	5.22957	4.91408	6.85051	0	3.42372	12.727	7.48885
Fam49a	0	0	0	0	0	0	1.15675	1.33953	1.429	1.75411	1.1357	0	0	0	0
Fam71e1	0	0	0	0	0	0	0	1.07397	1.28976	1.22154	1.98969	1.19878	1.15074	0	0
Fam81a	0	0	0	0	0	0	0	0	0	1.08275	1.20569	0	1.74951	0	0
Fam83a	0	0	0	0	0	0	1.79543	0	1.86533	2.62459	1.61709	0	0	0	0
Fam83f	0	0	0	1.8353	4.53618	3.06579	1.82838	1.76519	3.36989	4.38598	4.22289	2.06149	1.32372	0	0
Fan1	0	0	0	0	0	0	0	0	0	1.11777	0	0	0	0	0
Farp2	0	0	0	0	1.04794	1.28957	0	3.0531	2.66729	2.71489	1.94279	2.73149	3.24533	3.30084	1.90364
Fas	0	0	0	1.48408	1.79492	4.00029	6.04763	8.20551	10.1838	13.4347	14.1632	16.587	7.71301	7.46615	11.3889
Fblim1	0	0	0	0	1.26083	0	0	0	2.65036	2.80568	2.15578	0	0	0	0
Fbln5	0	0	1.10897	0	1.10689	1.14157	1.98963	2.31406	2.37486	3.60825	3.10884	2.46825	2.05198	0	0
Fbp2	0	0	0	0	0	0	0	0	0	0	0	1.61429	0	0	0
Fbxl21	0	0	0	0	0	0	0	0	0	0	3.89985	1.70635	0	0	0
Fbxo17	0	0	0	0	0	1.08086	1.40978	0	1.08574	0	0	0	0	0	0
Fbxo44	0	0	0	0	0	0	0	0	0	0	0	0	0	1.64823	0
Fcgr2b	0	0	1.41949	2.17996	2.05047	5.6073	8.23938	12.9686	12.6206	9.50897	16.2464	9.77667	11.4079	4.54111	8.73512
Fcgr4	0	1.23083	1.74917	2.7122	3.67504	3.81242	10.1301	7.8632	7.75349	7.3115	5.89388	3.10382	4.19863	3.32217	3.40493
Fcrla	0	0	0	0	0	1.51787	2.92366	7.77469	5.72065	1.96892	2.44085	0	0	0	0
Ffar2	0	0	0	0	0	1.66057	0	1.15614	0	0	0	0	0	0	0
Ffar4	0	0	0	0	0	0	5.36293	1.52552	0	1.12627	1.56983	1.3494	1.06787	0	0
Fgf1	0	0	0	0	0	1.37658	3.48595	5.94233	8.25952	18.216	12.1623	19.493	11.6663	12.4185	11.9597
Fgf21	0	0	0	0	0	0	0	12.9447	2.22946	4.16019	6.42602	29.5865	1.92117	1.10574	0
Fgfbp1	0	0	0	0	0	2.30786	3.43808	0	0	0	0	0	0	0	0
Fgl2	0	0	0	0	1.00223	0	1.55074	1.74156	1.94037	2.15224	1.33218	1.21996	0	0	0
Fgr	0	0	0	1.21801	2.23962	2.21521	1.57139	1.95735	1.89645	2.49936	1.7911	0	0	0	0
Fhad1	0	0	0	0	0	0	2.05055	0	0	0	0	0	0	0	0
Fign	0	0	0	1.61199	0	0	0	0	0	0	0	0	0	0	0
Fitm1	0	0	0	0	0	0	0	2.16673	2.36641	3.36482	2.48267	5.07055	4.42422	16.0123	5.97612
Fmnl2	0	0	0	0	1.04992	1.34209	1.76908	1.6094	1.29004	2.46177	1.56735	2.16343	1.28467	0	1.43058
Fmo2	0	0	0	0	0	0	0	0	1.38343	4.28109	3.00469	7.22522	11.6977	0	0
Fmo3	0	0	0	0	0	0	0	0	0	1.0439	0	0	51.7564	0	0
Fmo4	0	0	1.15407	2.52017	1.71905	3.44047	3.89091	2.3144	2.24578	7.00078	5.52278	4.60587	4.71253	1.91429	1.86082
Fmr1nb	0	0	0	0	0	0	0	0	1.1206	0	0	0	0	0	0
Fosb	0	1.73795	0	1.42403	0	0	0	0	0	0	0	0	0	0	0
Foxn3	0	0	2.15549	1.78696	1.93178	1.32622	3.79166	3.20835	1.14499	0	0	1.17296	1.11787	1.99232	2.01066
Foxq1	0	0	1.49359	3.32484	6.1454	18.0996	18.069	7.08789	12.0089	20.0535	11.5613	21.4144	9.8218	6.43477	7.90642
Foxs1	0	0	0	0	0	0	0	0	0	0	0	1.05306	0	0	0
Fpr1	0	0	0	1.22786	2.0815	3.54447	6.88767	3.70243	5.83083	5.37766	4.08285	2.30524	2.80604	1.32018	2.17995
Fpr2	0	0	0	2.04191	3.1286	7.66505	9.3034	6.77826	3.07527	4.13989	3.10394	1.37204	1.52381	0	0
Frmd4a	0	5.03804	0	10.1859	0	10.4488	0	2.62693	4.41078	4.06785	0	2.31774	1.43568	0	0
Frzb	0	0	0	0	0	0	0	0	0	1.11051	0	0	0	0	0
Fstl3	0	0	0	0	1.74698	1.62473	1.4538	0	1.45821	0	0	0	0	0	0
Fth-ps2	0	0	0	0	0	1.1	0	0	0	0	0	0	0	0	0
Fut7	0	0	0	0	1.27963	1.12605	0	0	0	0	0	0	0	0	0
Fxyd7	0	0	0	0	0	0	0	0	0	1.66867	1.65616	1.71013	1.31296	0	0
Fzd6	0	0	0	1.04234	0	1.00967	1.12017	1.61289	0	1.5919	1.6168	2.80414	1.83967	0	1.08106
G630090E17Rik	0	0	1.81802	1.9075	1.90002	2.10451	2.37917	2.09234	4.5057	5.4633	3.22459	2.63866	5.25934	9.5858	8.05229
Gabbr2	0	0	0	0	0	0	0	0	3.2668	5.63616	3.61319	1.9427	1.21406	3.06715	2.98368
Gal3st1	0	0	0	0	1.81862	0	3.66891	3.23008	2.60028	3.68597	4.39703	6.63106	2.92205	0	0
Galnt6	0	1.237	0	1.06071	1.42718	1.16185	1.87964	1.54883	1.15889	1.27806	1.20014	1.42372	0	0	0
Gan	0	1.04387	1.03975	0	0	0	0	0	0	0	0	0	0	0	0
Gapt	0	0	0	1.39478	2.16124	1.48157	0	1.30887	0	1.05417	0	0	0	0	0
Gas7	0	0	0	0	1.22841	0	0	0	0	1.19345	0	0	0	0	0
Gbgt1	0	0	0	0	0	0	1.00982	1.21436	1.56912	0	1.44307	0	0	0	0
Gbp10	0	0	0	0	0	0	1.13385	1.44386	2.1759	4.29575	3.52898	3.07587	0	2.2127	3.61384
Gbp11	0	0	0	0	0	0	0	2.9169	12.4526	13.0208	10.3079	7.93829	0	0	0
Gbp3	0	0	0	0	0	0	3.67638	2.77102	1.97654	3.5873	3.44019	3.63216	1.66551	0	1.49511
Gbp4	0	0	0	0	0	0	0	1.10721	1.23998	1.45333	2.02695	1.42453	0	0	0
Gbp7	0	0	1.16823	1.09352	0	1.87708	4.18319	4.46412	3.56109	4.2103	3.3478	3.50584	2.06454	0	1.51913
Gbp8	0	0	1.15478	1.52573	0	2.61581	3.58517	3.40492	3.46895	4.03532	3.97025	2.55035	1.40827	0	1.02706
Gbp9	0	0	0	0	0	0	1.9781	2.8008	2.89171	3.41413	2.40994	2.31548	1.08337	0	0
Gck	0	0	0	0	0	2.26627	6.31076	0	1.51942	1.24091	1.757	0	71.9318	61.7673	38.5043
Gcnt4	0	0	0	0	0	0	0	1.05515	0	0	0	1.00569	1.02519	0	0
Gda	0	0	0	1.15917	2.00641	1.64512	2.3058	2.74341	3.00527	1.96713	1.70461	0	2.33455	1.52589	2.6498
Gdpd3	0	0	0	0	0	1.02111	0	0	0	0	0	0	0	0	0
Gfi1	0	1.19458	1.29044	1.82772	2.74532	2.24214	1.65401	1.50616	0	0	0	0	0	0	0
Gfod1	0	0	0	0	3.66533	2.15985	1.19708	0	0	0	0	0	0	0	0
Ggt6	0	0	0	0	0	0	0	0	0	0	0	0	2.34155	15.0662	12.1114
Gimap3	0	0	0	0	0	0	0	0	1.21489	1.36478	1.41007	2.85996	2.41283	0	0
Gipr	0	0	0	0	2.65817	3.92134	0	0	0	0	0	0	0	0	0
Gja5	0	1.07597	1.21883	1.08075	1.23946	1.02703	1.87806	0	1.45213	1.41702	1.42364	0	0	0	0
Gjc2	0	0	0	0	0	0	0	0	0	0	1.0423	0	0	0	0
Gjc3	0	0	0	0	0	0	0	0	0	0	0	0	0	0	1.15777
Glcci1	0	0	0	1.57401	0	1.13276	0	0	0	0	0	0	0	0	0
Glod5	0	0	0	0	0	0	0	0	0	0	0	0	1.14155	0	0
Glt1d1	0	0	0	0	0	0	2.50702	8.82021	2.82782	3.26136	3.17368	11.0568	15.3564	1.58428	3.20753
Glt28d2	0	0	0	0	0	0	0	0	0	0	0	0	0	1.15179	1.07622
Glyat	0	0	0	0	0	0	0	2.68318	8.53117	17.325	24.9545	38.6956	50.9072	43.0509	52.1547
Gm10011	0	0	0	0	0	0	0	0	0	0	0	0	0	1.18486	3.48005
Gm10130	0	0	0	0	0	0	0	1.48986	0	0	0	0	0	0	0
Gm10134	0	0	1.47056	0	1.1256	1.36552	0	0	0	1.35894	0	1.42409	1.06865	1.14339	0
Gm10260	0	4.90902	3.50872	2.3821	2.77394	2.10615	2.01552	3.70671	1.84265	1.546	1.51039	2.25049	1.64832	1.31312	0
Gm10277	0	1.37897	0	0	0	1.71617	1.48693	1.62386	0	0	0	1.17197	0	0	0
Gm10311	0	0	0	0	0	0	0	0	0	0	1.16319	0	0	0	0
Gm10319	0	0	0	0	0	0	0	0	0	0	0	0	1.65202	13.8655	13.4226
Gm10320	0	1.14566	0	0	1.07489	1.56734	1.1615	0	1.08381	0	1.16993	1.06929	0	0	0
Gm10382	0	0	0	2.53197	1.52363	1.15274	3.05712	0	0	1.06678	1.44742	0	2.05091	0	2.97236
Gm10392	0	0	0	0	0	0	0	2.16869	1.07074	1.02533	1.09231	1.44283	3.26304	2.48116	1.43027
Gm10425	0	0	0	0	0	0	1.03171	0	0	0	0	0	0	0	0
Gm10478	0	0	0	0	0	0	1.15694	0	0	0	0	0	0	0	0
Gm10524	0	0	0	0	1.02128	0	0	1.21999	0	0	0	0	0	0	0
Gm10549	0	0	0	0	0	0	0	0	0	0	0	1.28674	0	0	0
Gm10567	0	0	1.50597	1.80474	2.85176	2.85008	1.82692	2.25049	7.85292	8.28045	7.98441	7.30119	5.88527	1.60729	0
Gm10602	0	0	0	0	0	0	0	0	0	0	0	1.20969	0	0	0
Gm10639	0	0	0	0	0	0	0	0	0	0	0	0	1.46162	0	0
Gm10644	0	0	0	0	0	0	0	0	0	0	0	0	1.98965	0	1.25426
Gm10680	0	0	0	0	0	0	0	16.288	1.20781	0	0	4.53246	0	3.25938	0
Gm10872	0	0	0	0	0	0	1.23225	0	0	0	0	0	0	0	1.73358
Gm11175	0	1.12663	1.09733	0	0	1.06373	0	0	0	0	0	0	0	0	1.81217
Gm11206	0	0	0	0	0	0	0	0	1.15385	1.30213	1.81419	0	1.3307	0	1.17717
Gm11212	0	0	0	0	0	0	0	0	0	0	0	0	0	0	1.1217
Gm11266	0	0	0	0	0	0	0	0	0	2.18836	1.72614	2.94888	1.51278	0	0
Gm11337	0	0	0	0	0	0	0	0	0	0	0	1.24066	0	0	0
Gm11341	0	0	0	0	0	0	0	0	0	0	0	0	0	0	1.04837
Gm11400	0	0	0	0	0	0	0	0	0	0	0	0	0	0	1.42789
Gm11437	0	0	0	0	0	0	0	0	0	0	0	0	1.03448	1.42138	0
Gm11510	0	0	0	0	0	1.96692	1.18118	0	0	0	0	0	0	0	0
Gm11520	0	0	0	1.28774	1.40653	0	0	0	0	0	0	0	0	0	0
Gm11575	0	0	1.2912	0	0	0	0	0	0	0	0	0	0	0	0
Gm11695	0	0	0	0	0	0	0	0	0	0	0	1.22558	2.10981	0	0
Gm11702	0	0	1.16495	0	0	0	0	1.16951	0	0	0	0	0	0	0
Gm11705	0	0	0	0	4.24106	3.09668	3.06395	0	0	0	0	0	0	0	0
Gm11739	0	0	0	1.02914	0	0	1.66631	1.36045	0	1.01243	1.66209	1.5723	1.18822	0	0
Gm11752	0	0	0	0	0	0	0	0	0	0	1.06942	1.16708	0	0	0
Gm11767	0	0	0	0	0	0	0	0	1.39327	1.35549	0	0	0	0	0
Gm11768	0	0	0	0	0	0	0	0	0	0	0	0	1.48999	0	0
Gm11772	0	0	0	0	0	1.55746	2.54611	1.04146	1.03509	0	0	1.46321	0	1.85053	0
Gm11773	0	0	0	0	0	0	0	0	0	0	0	0	0	1.03368	0
Gm11784	0	0	0	0	0	0	1.14396	0	0	0	0	0	0	0	0
Gm11787	0	0	1.06632	0	0	0	0	0	0	0	0	0	0	0	0
Gm11788	0	0	0	0	0	0	0	0	0	0	1.14275	0	0	1.05517	0
Gm11789	0	0	1.4873	1.00987	0	2.45367	3.58745	12.8092	5.32005	9.08021	11.303	13.4512	15.1797	25.2589	11.7008
Gm11837	0	0	0	0	0	0	0	0	0	1.4278	2.44543	2.29118	2.49751	0	0
Gm11843	0	0	0	2.04932	0	4.05599	4.47983	9.34737	11.0435	16.7133	40.9045	30.4535	19.0195	0	6.49293
Gm11844	0	0	0	0	0	0	0	0	2.33719	2.75335	3.91604	8.28665	3.36045	2.75302	2.23993
Gm11955	0	0	0	0	0	0	0	0	0	0	1.21031	0	0	0	0
Gm11962	0	0	0	0	0	0	1.91902	0	0	0	0	0	1.49507	1.68998	1.89865
Gm11963	0	0	0	0	0	0	1.21022	0	2.07324	1.58924	0	0	1.0093	2.37641	5.26589
Gm11967	0	0	0	0	0	0	0	0	0	0	0	0	1.41682	2.41143	0
Gm12057	0	0	0	0	0	1.49913	0	0	0	0	0	0	0	0	0
Gm12164	0	1.59101	1.34071	0	1.04319	0	0	0	1.26376	0	0	0	1.51563	1.60784	1.0071
Gm12195	0	0	0	0	0	0	0	2.21917	0	0	0	0	0	0	0
Gm12217	0	0	0	0	0	0	0	0	0	0	0	1.02357	0	0	0
Gm12245	0	0	0	0	0	1.09718	0	0	0	0	0	0	0	0	0
Gm12247	0	0	0	0	0	0	0	0	1.09891	0	1.57647	2.34386	1.85855	4.20743	1.71579
Gm12250	0	0	0	0	0	0	1.72167	1.33492	1.26086	0	1.09551	1.25883	0	0	0
Gm12264	0	0	1.01606	0	0	0	0	0	0	0	0	0	0	0	0
Gm12265	0	0	0	0	0	0	0	0	1.33645	3.1563	3.0992	0	0	1.51801	0
Gm12337	0	0	0	0	0	0	1.10176	0	1.67761	1.0404	1.17484	1.38032	0	0	0
Gm12345	0	0	0	0	0	0	0	1.08046	0	0	0	0	0	0	0
Gm12353	0	0	0	1.11128	0	1.26002	1.33214	1.77723	3.13287	2.63288	1.92757	2.38325	3.49058	1.39203	1.78842
Gm12354	0	0	0	0	0	0	0	0	1.1719	1.37129	2.28858	5.23725	3.41326	1.99881	0
Gm12473	0	0	0	0	0	0	0	0	0	0	0	0	0	0	2.64242
Gm12494	0	1.28604	0	1.20638	2.08163	1.47068	1.14679	0	1.78197	1.81795	1.5201	1.61995	5.38203	9.47873	4.62307
Gm12523	0	0	0	0	0	1.13208	0	0	1.21003	1.6334	0	0	0	0	0
Gm12592	0	1.26161	0	0	0	0	0	0	0	0	0	0	0	0	0
Gm12666	0	0	1.14351	0	0	0	0	0	0	0	0	0	0	0	0
Gm12781	0	0	0	0	0	0	0	1.16689	0	1.33354	1.34669	2.40236	1.7448	2.01132	2.62837
Gm12799	0	1.01867	0	0	0	0	0	0	0	0	0	0	0	0	0
Gm12840	0	0	0	0	0	0	0	0	1.14489	0	0	0	1.23823	0	0
Gm12905	0	1.25384	0	0	0	0	1.18847	0	0	0	0	0	0	0	0
Gm12909	0	0	0	0	0	0	0	0	0	0	0	0	2.18862	2.90545	4.90605
Gm12932	0	0	1.35348	0	0	0	0	0	0	0	0	0	0	0	0
Gm12944	0	0	1.13696	0	0	0	0	0	0	0	0	0	0	0	0
Gm13012	0	0	0	0	1.23398	1.05411	1.27771	1.34526	0	0	0	0	0	0	0
Gm13033	0	1.44802	1.00469	0	0	0	0	0	0	0	0	0	0	0	0
Gm13066	0	1.40587	1.03633	1.13225	1.39075	2.50201	2.82226	2.04995	2.80354	1.87612	0	1.6338	1.66138	2.36535	0
Gm13068	0	0	0	0	0	0	1.12554	1.08991	0	0	0	1.16799	0	0	0
Gm13071	0	0	0	0	1.10358	0	0	0	0	0	0	0	0	0	0
Gm13166	0	1.48802	0	0	0	0	0	0	0	0	0	0	0	0	0
Gm13194	0	0	0	0	0	0	0	2.19762	1.60613	1.17227	1.18073	3.30387	1.75803	1.38914	3.34519
Gm13203	0	0	0	0	0	0	0	0	0	0	0	1.60744	0	0	0
Gm13258	0	0	0	0	0	0	0	0	0	1.50249	0	1.14916	0	0	0
Gm13306	0	0	0	0	0	0	0	0	0	0	0	0	1.38618	1.11642	0
Gm13339	0	0	0	0	0	0	0	0	1.80949	1.56828	2.19589	0	2.99365	1.60316	2.14457
Gm13363	0	0	0	0	0	0	0	0	0	3.0206	0	0	3.96938	0	0
Gm13369	0	0	0	0	0	0	0	1.1295	0	0	0	0	0	0	0
Gm13378	0	0	1.16403	0	0	0	0	0	0	0	0	0	0	0	0
Gm13392	0	0	0	0	1.90112	0	0	0	0	0	0	0	0	0	0
Gm13427	0	0	1.00184	0	0	1.0569	0	0	0	0	0	0	0	0	0
Gm13528	0	0	0	0	0	0	0	0	0	0	0	0	1.2902	0	0
Gm13542	0	0	0	1.10388	0	1.01006	0	0	0	0	0	0	0	0	0
Gm13568	0	0	1.08725	0	0	1.53137	1.75917	0	1.03095	0	1.03354	0	0	0	0
Gm13573	0	0	0	0	0	0	0	1.32136	0	0	0	0	0	0	0
Gm13594	0	0	0	0	0	0	0	1.05997	0	1.06778	1.69654	1.73721	1.36026	0	0
Gm13607	0	0	0	0	0	0	0	0	0	0	0	0	1.01168	0	1.11489
Gm13653	0	1.15912	1.44365	0	0	0	0	0	0	0	0	0	0	0	0
Gm13689	0	0	0	0	0	1.01884	0	0	0	0	0	0	0	0	0
Gm13705	0	0	0	0	0	0	0	0	0	0	0	0	1.39341	0	0
Gm13710	0	0	0	1.56579	1.28757	1.35664	1.57347	1.31941	1.05949	1.03823	0	0	0	0	0
Gm13773	0	0	0	0	0	0	0	0	0	0	0	0	0	1.00891	1.56848
Gm13775	0	0	0	0	0	0	0	0	0	0	0	0	0	4.07316	5.5585
Gm13789	0	1.16117	0	0	0	1.51002	0	0	0	0	0	1.01689	0	0	0
Gm13824	0	0	0	0	0	0	0	0	0	0	0	0	1.16189	0	1.68938
Gm13825	0	0	0	0	0	0	0	0	0	0	1.10909	0	0	0	0
Gm13840	0	0	0	0	0	0	0	0	1.07931	0	0	1.06193	0	1.48836	1.26319
Gm13842	0	0	0	0	1.10702	0	0	0	0	0	0	0	0	0	0
Gm13855	0	0	1.36243	1.45924	0	0	0	0	1.86432	1.91814	3.14567	0	0	0	0
Gm13868	0	0	0	0	0	1.18898	0	1.20943	0	0	0	0	0	0	0
Gm13919	0	0	0	0	0	0	0	1.20126	0	0	0	0	0	0	0
Gm14005	0	1.40393	0	0	0	0	1.29272	2.51033	0	0	1.0785	0	0	0	0
Gm14009	0	0	0	0	0	0	1.12222	0	0	0	0	0	0	0	0
Gm14011	0	0	0	0	0	0	1.01217	0	0	0	0	0	0	0	0
Gm14044	0	0	1.03332	0	1.03073	3.61371	0	0	0	0	0	0	0	0	0
Gm14048	0	0	1.20856	0	0	0	0	0	0	0	0	0	0	0	0
Gm14097	0	0	0	0	0	0	1.14308	3.49724	2.36493	1.92731	1.35886	5.99029	1.31279	0	1.28395
Gm14167	0	0	0	0	0	0	0	0	0	0	0	0	1.15069	0	0
Gm14200	0	0	0	1.97531	0	0	0	0	0	0	0	0	0	0	0
Gm14201	0	0	0	0	0	0	0	1.03784	0	0	0	0	0	0	0
Gm14202	0	0	0	0	0	0	0	0	0	0	0	0	1.20067	0	0
Gm14207	0	0	0	0	1.00402	0	0	0	0	0	0	0	0	0	0
Gm14295	0	0	0	0	0	0	0	1.04638	0	0	0	1.37331	0	0	0
Gm14321	0	0	0	0	0	0	0	0	0	0	0	1.27143	0	0	0
Gm14327	0	0	0	0	0	0	0	0	0	0	0	0	0	1.20953	2.31999
Gm14403	0	0	0	0	0	0	0	0	0	0	0	0	1.27081	1.37492	1.75465
Gm14410	0	0	1.47085	0	0	0	0	1.17989	0	1.16665	0	1.37205	1.01416	0	0
Gm14467	0	0	0	1.20197	0	0	0	0	0	0	0	0	0	0	0
Gm14541	0	0	0	0	1.26653	1.11452	0	0	0	0	0	0	0	0	0
Gm14794	0	0	0	0	0	0	0	0	0	0	0	0	1.0812	0	0
Gm14822	0	0	0	0	0	0	0	0	0	0	0	0	0	1.07639	1.41931
Gm14863	0	0	0	0	1.23797	0	0	0	0	0	0	0	0	0	0
Gm14928	0	0	1.215	0	0	0	0	0	0	0	0	0	0	0	0
Gm14964	0	0	0	0	0	0	0	0	0	1.586	1.9627	3.40354	1.1804	0	1.20703
Gm15009	0	0	0	0	0	0	1.85559	0	0	0	0	2.47586	0	0	0
Gm15190	0	0	0	0	0	0	0	0	1.10986	0	0	0	0	0	0
Gm15222	0	0	0	0	0	0	0	0	1.13725	0	0	2.18897	0	0	0
Gm15318	0	0	0	0	0	0	0	2.58936	4.82586	3.79337	6.26642	2.26214	8.82161	5.23548	3.91725
Gm15327	0	0	0	0	0	0	0	1.19767	0	0	0	0	0	0	0
Gm15343	0	0	0	0	0	0	0	1.62394	0	1.1224	0	0	0	3.43746	2.08371
Gm15348	0	0	0	0	0	0	0	0	0	0	0	0	0	0	1.52139
Gm15365	0	2.24215	0	0	0	0	0	0	0	0	0	0	0	0	0
Gm15378	0	0	0	0	1.29443	0	0	0	0	0	0	0	0	0	0
Gm15408	0	0	0	0	0	0	0	0	0	0	0	1.63074	1.3235	0	0
Gm15417	0	0	0	0	1.04275	2.03009	2.78941	5.90241	3.35629	3.71165	3.03705	3.1054	5.97605	4.77926	3.91552
Gm15420	0	0	0	0	0	0	0	0	0	0	0	0	0	0	1.20037
Gm15428	0	0	1.10427	0	0	0	0	0	0	0	0	0	0	0	0
Gm15502	0	0	0	0	0	1.17292	5.24751	6.43976	2.2494	2.77439	2.02115	3.19884	14.5596	1.37164	7.56691
Gm15512	0	0	1.18374	1.11973	0	0	0	0	0	0	0	0	0	0	0
Gm15540	0	0	0	0	0	0	2.18501	0	1.85459	2.89102	1.21979	5.37965	1.93728	0	3.06085
Gm15610	0	3.90279	1.12064	4.68055	4.20908	3.8586	0	2.53319	1.06601	1.88701	1.08519	1.85799	1.87776	0	1.6485
Gm15611	0	0	0	1.22246	0	2.31165	0	18.6931	8.64304	20.8322	7.89471	9.96758	1.61947	1.71297	3.37427
Gm15622	0	0	0	0	0	0	1.27638	8.50502	5.22918	2.72335	5.56156	2.27169	8.2839	1.99966	2.99235
Gm15635	0	0	0	0	0	0	0	0	0	0	0	0	0	1.28085	0
Gm15638	0	0	0	0	0	0	0	1.22692	0	1.32032	1.59959	3.61062	1.21948	0	1.43963
Gm15655	0	1.32172	0	0	0	0	0	0	0	1.08956	0	0	0	0	0
Gm15674	0	0	0	0	0	0	0	0	0	0	0	1.09343	0	0	0
Gm15686	0	0	0	0	0	0	0	0	0	0	0	1.34762	1.5339	0	0
Gm15690	0	0	0	0	0	0	0	0	0	0	0	0	4.68839	1.07558	14.9512
Gm15694	0	0	0	0	0	0	0	3.05154	1.13944	0	0	1.00028	0	0	0
Gm15712	0	0	0	0	0	0	0	1.18377	0	0	0	0	0	0	0
Gm15717	0	0	0	1.3546	0	0	0	0	1.26408	0	0	0	0	0	0
Gm15726	0	0	0	0	0	0	0	0	0	0	1.16427	0	0	0	2.76486
Gm15746	0	0	0	0	0	0	0	1.3663	0	0	1.11522	3.11076	3.53975	0	1.09959
Gm15756	0	0	0	0	0	0	0	0	0	0	0	1.09902	1.54984	0	1.76199
Gm15760	0	1.19722	0	1.30353	0	1.11254	0	0	0	0	0	0	0	0	0
Gm15764	0	0	0	0	0	0	0	0	0	0	1.15782	0	0	0	0
Gm15774	0	1.60364	1.73777	1.76964	1.91646	2.14029	1.35592	0	0	0	0	0	0	0	0
Gm15787	0	0	0	1.2194	0	0	0	0	0	0	0	1.0518	0	0	0
Gm15788	0	0	0	0	0	0	0	0	0	1.28899	1.07345	1.08983	2.21257	0	0
Gm15815	0	1.37834	1.78454	0	0	1.27845	0	0	0	0	0	0	0	0	0
Gm15846	0	0	1.1715	0	0	0	0	0	0	0	0	0	0	0	0
Gm15856	0	0	0	0	0	0	0	0	0	0	0	0	1.01584	0	0
Gm15883	0	0	0	0	0	0	0	1.09732	1.16766	0	1.34092	0	2.82338	3.15829	2.16552
Gm15884	0	0	0	0	0	0	1.12195	1.09545	0	0	0	0	0	0	0
Gm15888	0	0	1.15476	0	0	0	0	0	0	0	0	0	0	0	0
Gm15889	0	0	0	1.97404	6.7	11.2698	17.4233	4.95728	1.24912	1.7032	0	3.59687	3.14706	0	0
Gm15890	0	0	0	0	1.19341	2.55945	2.25689	1.10271	0	0	0	1.3099	1.24204	0	0
Gm15922	0	0	0	0	0	0	0	0	0	1.14104	0	0	0	0	0
Gm15932	0	0	0	0	0	0	0	0	0	0	0	0	1.17342	0	0
Gm15972	0	0	0	0	0	0	1.14536	0	0	0	0	0	0	0	0
Gm15981	0	0	0	0	0	0	0	0	0	0	0	1.43396	0	0	0
Gm15982	0	0	0	0	0	0	0	0	0	1.37746	1.52321	5.51968	0	0	0
Gm15998	0	0	0	0	0	0	0	0	0	0	0	0	0	3.57472	8.02118
Gm16001	0	0	1.48949	0	0	0	0	0	0	0	0	0	0	0	0
Gm16008	0	0	0	0	0	0	1.08048	0	0	1.21408	0	0	0	0	0
Gm16035	0	0	0	0	0	0	0	0	0	0	0	0	0	1.51914	0
Gm16089	0	1.01302	1.1867	0	0	1.2093	2.23903	1.31879	1.62977	1.62217	2.58203	2.51717	3.07391	1.33893	2.31583
Gm16091	0	0	0	0	0	0	0	0	0	0	0	1.11412	0	0	0
Gm16124	0	0	0	1.14292	0	0	1.2609	4.59676	0	1.32809	0	2.12563	6.71517	3.45893	3.24621
Gm16157	0	0	0	0	0	0	0	1.43694	1.83845	2.97426	3.74526	4.68521	5.8947	4.77864	3.81306
Gm16174	0	0	0	0	0	1.67865	2.83441	3.03816	2.21051	2.16935	2.66219	4.85327	2.63772	2.23288	1.29192
Gm16230	0	0	0	0	0	0	0	0	0	0	0	1.01951	0	0	0
Gm16238	0	0	1.05735	0	0	0	0	0	0	0	0	0	0	0	0
Gm16253	0	0	0	1.02184	0	0	0	0	0	0	0	1.05099	0	0	0
Gm16277	0	0	0	0	1.21386	0	0	0	0	0	0	1.17514	0	0	0
Gm16288	0	0	1.21729	0	0	0	1.16142	0	0	0	0	0	0	0	0
Gm16332	0	0	0	0	0	1.61527	2.37086	3.32761	4.03458	9.05263	6.67626	7.8496	10.7142	6.99142	18.1689
Gm16340	0	0	0	0	0	0	0	1.09193	0	0	0	1.8445	1.0029	0	0
Gm16348	0	0	0	0	0	0	0	0	0	0	0	1.88682	0	0	3.81701
Gm16379	0	0	0	0	0	0	0	1.02776	0	0	0	0	0	0	0
Gm16439	0	0	0	0	1.18524	1.44112	1.84812	0	0	0	0	0	0	0	0
Gm16537	0	0	0	0	0	0	0	0	1.49773	0	1.34995	0	0	0	0
Gm16548	0	0	0	0	0	0	0	0	1.37649	1.90673	2.22575	2.31268	3.45348	5.93115	5.52217
Gm16551	0	0	0	0	0	4.22212	14.0017	11.0162	7.4624	6.14419	2.98035	0	0	4.69325	2.75331
Gm16556	0	0	0	0	0	0	1.15849	0	0	0	0	0	0	0	0
Gm16559	0	0	0	0	0	1.42705	1.82427	0	0	1.51514	1.40144	2.21011	2.78228	1.70163	1.47325
Gm16567	0	0	0	0	0	0	0	0	0	0	0	5.10196	0	0	5.80699
Gm16573	0	0	0	0	2.36784	7.39749	7.32232	9.01835	1.0744	0	1.39244	2.13471	14.9144	5.25672	2.47557
Gm16574	0	0	1.17205	0	0	0	0	0	0	0	1.09005	1.05284	0	0	0
Gm16587	0	0	0	0	0	0	0	0	0	0	0	0	0	0	1.33016
Gm16617	0	0	1.12667	0	0	0	0	0	0	0	0	0	0	0	0
Gm16675	0	0	0	0	0	0	0	1.53932	0	0	0	0	0	0	0
Gm16712	0	0	0	0	0	0	1.13844	1.12137	0	0	0	0	0	0	0
Gm16731	0	0	0	0	0	0	0	0	0	0	0	0	1.18585	0	1.41109
Gm16793	0	0	0	0	0	0	1.02365	0	2.17393	0	0	0	0	0	0
Gm16861	0	0	0	0	0	0	0	0	0	0	1.0716	1.31155	0	0	0
Gm16933	0	0	0	0	0	0	1.17944	1.35676	0	1.18031	0	1.12942	0	0	0
Gm16984	0	0	0	0	0	0	0	0	0	0	0	2.08189	0	0	0
Gm17021	0	0	0	0	0	0	0	0	0	1.07015	0	1.25618	0	0	0
Gm17023	0	0	0	0	0	0	1.19235	1.39976	0	0	0	1.04968	0	0	0
Gm17104	0	0	1.59175	0	0	0	0	1.15041	0	0	0	0	0	0	0
Gm17108	0	0	0	0	0	0	0	0	0	0	0	0	0	4.9554	2.86612
Gm17110	0	0	0	0	0	0	0	0	0	0	0	1.10236	0	1.00044	0
Gm17112	0	0	0	0	0	1.05245	0	0	0	1.06887	0	0	0	0	0
Gm17120	0	0	0	0	0	0	1.28415	0	0	0	0	0	0	0	0
Gm17179	0	0	0	0	0	0	0	0	0	0	0	4.21365	0	0	0
Gm17196	0	0	0	0	0	0	0	0	0	0	0	1.32096	1.2707	3.03908	1.94505
Gm17305	0	0	0	0	0	0	1.50496	0	0	0	1.071	1.59666	0	0	0
Gm17324	0	1.61557	1.24	0	1.19166	0	0	0	0	0	0	0	0	0	0
Gm17538	0	0	0	1.19454	0	0	0	0	0	0	0	0	0	0	0
Gm17634	0	0	0	0	0	0	0	0	0	0	0	1.3561	0	0	0
Gm17662	0	0	0	0	0	0	0	1.47051	0	1.48554	1.66232	0	0	0	0
Gm17688	0	0	0	0	0	0	1.16745	1.00979	1.20791	1.36996	0	1.12915	1.48973	1.76758	1.19799
Gm17690	0	0	1.07764	0	0	0	0	0	0	0	0	0	0	0	0
Gm17720	0	0	0	0	0	0	0	0	0	0	0	1.3266	0	0	0
Gm17907	0	0	0	0	0	1.20936	0	1.54693	0	0	0	0	0	0	0
Gm1840	0	1.32508	0	0	1.12932	0	0	0	0	0	0	0	0	0	0
Gm1862	0	0	1.01743	0	0	0	0	0	0	0	0	0	0	0	0
Gm19357	0	0	0	0	0	0	0	0	0	0	1.11068	0	0	0	0
Gm1968	0	1.1947	0	0	0	0	0	0	0	0	0	0	0	0	0
Gm19705	0	0	0	0	0	1.46795	1.77479	1.46201	1.13132	1.35135	2.11923	1.77219	0	0	0
Gm19980	0	0	0	0	0	1.66882	0	1.59753	1.53749	0	0	0	0	0	0
Gm20033	0	0	1.9701	0	0	2.04188	1.5451	3.00852	0	0	0	0	0	0	0
Gm20319	0	0	0	0	0	0	2.26833	15.4552	15.1598	20.9094	19.853	49.54	58.9011	54.9007	41.5675
Gm20402	0	0	0	0	0	0	0	0	1.08722	0	0	0	0	0	0
Gm20444	0	0	0	0	0	0	0	1.08658	0	1.18157	1.0512	1.16222	0	0	0
Gm20457	0	0	1.21353	1.19935	0	0	1.04775	0	0	1.34463	1.66384	1.16196	1.26002	0	0
Gm20463	0	0	0	1.5348	1.53095	1.55469	1.23368	0	0	0	0	0	0	0	1.21107
Gm20522	0	0	0	0	0	0	1.03407	1.33303	0	0	0	1.69985	1.62899	1.06427	0
Gm20528	0	0	0	0	0	1.00146	6.12681	9.95266	5.12197	5.29432	7.10065	18.6378	14.2509	10.9537	3.84608
Gm20544	0	0	0	0	0	0	0	0	1.52527	1.09721	0	0	1.35722	0	0
Gm20645	0	0	0	0	1.07135	0	1.24454	1.32471	1.58887	1.31184	1.48018	1.59772	1.33738	0	0
Gm20659	0	0	0	0	1.55048	1.70543	0	4.311	1.56395	0	2.43953	1.28663	0	1.24844	1.42151
Gm20667	0	0	1.36389	1.18364	0	0	0	0	0	0	0	0	0	0	0
Gm20684	0	0	0	0	0	0	0	0	1.25291	0	2.70345	2.36124	2.41893	5.23599	3.50745
Gm20691	0	0	1.00006	1.31577	0	0	1.09303	0	0	0	0	0	0	0	0
Gm20703	0	0	0	0	0	0	0	0	0	0	0	1.06582	0	0	0
Gm21028	0	0	0	0	0	0	0	0	0	0	0	0	0	1.60777	0
Gm21748	0	0	0	0	0	0	0	0	0	0	0	0	0	0	4.24462
Gm21860	0	0	0	0	0	0	0	0	0	0	0	1.19081	1.22916	0	6.53387
Gm21960	0	0	1.04523	1.0128	0	0	0	0	0	0	0	0	0	0	0
Gm21967	0	0	1.19034	0	0	2.21649	0	0	1.36352	0	0	1.19672	1.37539	0	0
Gm22027	0	1.70592	1.07603	1.24626	1.1355	0	0	0	0	0	0	0	0	0	0
Gm22036	0	0	0	0	0	0	0	0	0	0	0	2.51583	1.48144	0	0
Gm22043	0	0	0	0	0	1.25836	1.10414	2.4767	0	1.34692	0	2.33592	1.58535	0	1.00818
Gm22059	0	0	0	0	0	1.10741	1.62621	0	0	0	0	0	0	0	0
Gm22107	0	0	0	0	0	0	0	0	1.17816	0	0	0	0	0	0
Gm22200	0	0	0	0	0	1.15597	0	0	0	0	0	0	0	0	0
Gm22208	0	0	0	0	0	0	0	0	0	1.01108	0	0	0	0	0
Gm22235	0	0	0	0	0	0	0	0	0	0	0	0	4.05957	0	2.24878
Gm22240	0	1.57652	0	0	0	0	0	0	0	0	0	0	0	0	0
Gm22249	0	0	0	0	0	0	0	0	0	0	1.02428	0	0	0	0
Gm22333	0	0	0	0	1.00275	0	0	1.67434	1.59373	1.00589	1.16033	0	1.06076	0	0
Gm22378	0	0	0	0	0	0	0	1.31595	0	1.94566	1.5521	2.36735	1.14345	0	0
Gm22394	0	0	0	0	2.94327	4.00239	5.47824	4.02132	3.58354	2.74828	1.74543	2.09584	2.32922	0	1.24365
Gm22442	0	0	0	0	0	0	0	0	0	0	1.23173	0	0	0	0
Gm22499	0	0	0	0	0	0	0	0	0	0	0	2.53093	0	0	0
Gm22573	0	0	1.03952	0	0	1.07007	1.12165	0	0	0	0	0	0	0	0
Gm22591	0	0	0	1.06489	0	0	0	0	0	0	0	0	0	0	0
Gm22596	0	0	0	2.71029	1.6364	0	0	0	1.08071	0	0	0	0	0	0
Gm22614	0	1.44434	0	0	0	0	0	0	0	0	0	0	0	0	0
Gm22637	0	0	0	0	0	0	0	0	0	1.3072	2.01064	1.31523	1.11982	0	0
Gm22655	0	0	0	0	0	0	0	0	0	1.8257	2.16621	1.39098	2.13573	0	0
Gm22716	0	0	1.35482	1.28682	1.11421	3.41138	0	0	0	0	0	0	0	0	0
Gm22753	0	0	0	0	0	0	0	1.0689	0	0	0	0	1.14132	0	0
Gm22770	0	0	0	0	0	0	0	0	0	1.24086	0	0	0	0	0
Gm22818	0	0	4.61982	0	0	6.96569	0	0	0	0	0	0	0	0	0
Gm22871	0	0	1.17698	1.28374	2.79605	6.18013	8.3895	4.90926	3.75535	3.2603	3.07221	3.15755	3.51528	0	1.82989
Gm22933	0	0	1.53059	0	0	1.13771	0	1.21757	0	0	0	0	0	0	0
Gm23027	0	0	0	0	0	0	0	1.00619	0	0	0	0	0	0	0
Gm23127	0	1.43379	1.38976	0	0	0	0	0	0	0	0	0	0	0	0
Gm23205	0	0	0	0	0	1.02626	0	1.35947	0	0	0	0	0	0	0
Gm23232	0	0	0	0	0	1.93693	0	0	0	0	0	0	0	0	0
Gm23306	0	0	0	0	0	0	1.09242	1.18108	0	0	0	0	0	0	0
Gm23318	0	0	0	0	0	0	0	0	1.61093	0	0	0	0	0	0
Gm23444	0	0	0	1.12915	0	1.57468	0	0	0	0	0	0	0	0	0
Gm23445	0	0	0	0	0	0	0	0	0	1.15295	0	0	0	0	0
Gm23474	0	1.2832	1.60355	2.21939	0	0	0	0	0	0	0	0	0	0	0
Gm23497	0	0	1.16366	0	0	0	0	0	2.87774	1.56664	1.61245	1.17701	0	0	0
Gm23572	0	0	0	0	0	0	0	0	0	0	0	1.84514	1.93495	0	0
Gm23726	0	0	0	0	0	0	0	0	0	0	0	0	0	2.43528	4.489
Gm23802	0	0	0	0	0	1.42582	0	0	0	0	0	0	0	0	0
Gm23849	0	1.48092	0	0	0	0	2.1955	0	0	0	0	0	0	0	0
Gm23971	0	1.20047	0	1.41562	1.42152	0	0	0	0	0	0	0	0	0	0
Gm2399	0	0	0	0	0	0	0	0	1.25928	0	0	0	0	0	0
Gm24010	0	1.48637	1.4568	1.38841	0	1.88869	0	0	0	0	0	0	0	0	0
Gm24022	0	0	0	0	0	0	0	0	1.07441	0	0	0	0	0	0
Gm24045	0	0	0	0	0	0	0	0	0	0	0	1.11163	0	0	0
Gm24086	0	0	0	0	0	0	0	1.53886	1.0721	0	1.01774	0	0	0	0
Gm24091	0	0	0	0	0	0	0	0	1.23086	0	0	0	0	0	0
Gm24196	0	0	0	0	0	0	0	0	0	0	0	0	0	0	12.0806
Gm24289	0	1.23185	0	0	0	0	0	0	0	0	0	0	0	0	0
Gm24313	0	1.8134	0	0	0	0	0	0	0	0	0	0	0	0	0
Gm24321	0	0	0	0	0	1.20298	0	0	0	0	0	0	0	0	0
Gm24336	0	0	1.20162	0	0	0	0	0	0	0	0	0	0	0	0
Gm24366	0	0	0	0	0	0	1.07568	0	0	0	0	0	0	0	0
Gm24371	0	0	0	0	0	1.02063	0	0	0	0	0	0	0	0	0
Gm24447	0	1.35577	0	0	0	0	0	0	0	0	0	0	0	0	0
Gm24644	0	0	1.09163	0	0	1.0339	0	0	0	0	0	0	0	0	1.11508
Gm24840	0	0	0	0	0	0	0	0	0	0	1.00531	0	0	0	0
Gm24846	0	0	0	0	0	0	1.36019	1.17074	0	0	0	0	0	0	0
Gm24920	0	0	0	1.08099	0	1.31445	1.35573	1.18025	0	0	0	0	0	0	0
Gm24924	0	0	0	0	0	1.27334	0	0	0	0	0	0	0	0	0
Gm24927	0	0	0	0	0	0	0	0	0	0	1.85496	0	1.16731	0	0
Gm24950	0	1.90021	0	0	0	0	0	0	0	0	0	0	0	0	0
Gm24958	0	0	0	0	1.07288	0	0	0	0	1.53691	0	0	0	0	0
Gm24959	0	0	0	0	0	1.16607	0	0	0	0	0	0	0	0	0
Gm24975	0	1.76569	0	0	0	0	0	1.08571	0	1.02339	1.12862	0	0	0	0
Gm24991	0	0	0	0	0	1.50198	0	0	0	0	0	0	0	0	0
Gm25047	0	0	0	0	0	1.21054	0	1.23631	0	1.37885	1.72596	0	0	0	0
Gm25117	0	0	1.70818	1.15657	0	0	0	0	0	0	0	0	0	0	0
Gm25149	0	0	0	0	0	0	0	0	0	0	0	1.23795	0	0	0
Gm25177	0	0	0	0	0	0	0	0	0	0	1.38219	0	0	0	0
Gm25184	0	0	0	0	1.03475	0	0	1.2971	0	0	1.59399	1.74276	0	0	0
Gm25193	0	0	0	0	2.22385	1.9222	0	0	0	0	0	0	0	0	0
Gm25220	0	0	0	0	0	1.07343	0	0	0	0	0	0	0	0	0
Gm25262	0	0	0	0	0	0	0	0	0	0	0	0	0	1.07632	2.3494
Gm25291	0	1.28942	0	0	0	1.31772	1.28443	0	0	0	0	0	0	0	0
Gm25301	0	0	0	0	0	0	0	0	0	0	0	1.01639	0	0	0
Gm25348	0	0	0	0	0	0	1.00389	0	0	0	0	0	0	0	0
Gm25395	0	0	0	0	0	0	0	0	0	0	0	0	0	0	2.27935
Gm25428	0	0	0	0	0	0	0	0	0	0	1.03384	0	0	0	0
Gm25465	0	0	0	0	0	1.50802	0	0	0	0	0	0	0	0	0
Gm25593	0	0	0	0	0	0	0	0	0	0	0	0	0	1.09976	0
Gm25604	0	0	0	0	0	0	0	0	1.01325	0	0	0	0	0	0
Gm25637	0	0	0	0	0	0	0	1.14984	0	0	0	0	0	0	0
Gm25663	0	0	0	1.42082	0	0	0	0	0	0	0	0	0	0	0
Gm25777	0	0	1.1609	0	1.23681	0	1.02754	0	0	0	0	0	0	0	0
Gm25788	0	0	1.51072	2.41953	2.03323	1.57002	2.28227	0	0	0	0	0	0	0	0
Gm25979	0	0	0	0	0	1.16195	0	0	0	0	0	0	0	0	0
Gm26153	0	0	0	0	0	0	0	0	1.14753	0	0	0	0	0	0
Gm26280	0	0	0	0	0	0	0	0	0	0	0	1.04103	0	0	0
Gm26361	0	0	1.08055	0	0	0	0	0	0	0	0	0	0	0	0
Gm26403	0	0	0	0	0	0	1.12939	0	0	0	0	0	0	0	0
Gm26424	0	0	0	0	0	0	0	0	0	0	0	1.29827	0	0	0
Gm26497	0	1.23004	1.00245	0	0	3.14195	0	0	0	0	0	0	0	0	0
Gm26515	0	0	0	0	0	0	0	1.27468	0	0	0	0	0	0	0
Gm26516	0	0	0	1.1798	0	1.07862	0	0	0	0	0	0	0	0	0
Gm26532	0	0	0	0	0	1.16798	1.55913	2.5664	1.20974	1.24993	1.56981	1.52239	1.17466	0	0
Gm26587	0	0	0	0	0	0	0	1.04425	0	0	0	0	0	0	0
Gm26588	0	0	0	0	0	0	0	0	0	0	0	2.08083	0	0	0
Gm26596	0	0	0	0	0	0	0	0	0	0	1.84007	0	1.64914	0	0
Gm26602	0	1.08128	1.01074	0	0	0	0	0	0	0	0	0	0	0	0
Gm26605	0	0	1.05718	0	1.88892	0	0	2.13352	1.07327	1.18034	1.46954	0	0	0	0
Gm26608	0	0	0	0	0	0	0	0	0	0	0	0	1.1994	1.20381	1.30886
Gm26623	0	1.21017	1.12099	0	0	0	0	0	0	0	0	0	0	0	0
Gm26637	0	0	0	0	0	0	1.08386	0	0	0	0	0	0	0	0
Gm26684	0	0	0	0	0	0	0	0	1.00422	0	0	0	0	0	0
Gm26697	0	0	0	0	0	0	0	1.23584	0	1.35502	0	1.16891	1.15586	0	0
Gm26722	0	1.56704	2.25095	1.77276	3.73025	5.35601	0	0	0	1.06907	1.57095	1.53673	0	2.25911	0
Gm26736	0	1.01491	0	0	0	1.6263	1.76184	1.10182	0	0	0	1.09506	0	0	0
Gm26740	0	0	0	0	0	1.34241	0	0	0	0	0	0	0	0	0
Gm26762	0	0	0	0	0	0	1.18263	0	0	0	0	0	0	0	0
Gm26782	0	0	0	0	0	0	0	0	0	0	0	1.90443	1.17648	0	0
Gm26786	0	0	0	0	0	0	0	1.05974	0	0	0	0	0	0	0
Gm26882	0	0	0	0	0	1.10131	0	0	0	0	0	1.12414	0	0	0
Gm26903	0	0	0	0	0	0	1.01405	0	1.2069	1.37692	1.24371	1.8493	1.07079	0	0
Gm26908	0	0	0	0	0	0	1.20686	0	0	1.00166	0	2.0256	2.23793	0	0
Gm26910	0	0	1.374	0	0	0	0	0	0	0	0	0	0	0	0
Gm26935	0	0	0	0	0	1.55778	0	0	1.00194	0	0	0	1.11607	0	0
Gm26944	0	0	1.44708	0	0	0	0	0	0	0	0	0	0	0	0
Gm26951	0	2.25188	1.73711	1.46192	1.17524	1.12122	1.25797	0	0	0	0	0	0	0	0
Gm26992	0	0	1.19167	1.52586	0	0	0	0	0	0	0	0	0	0	0
Gm26999	0	0	0	0	0	0	0	0	0	1.01678	0	0	2.25828	0	0
Gm27003	0	0	1.38285	0	1.22053	1.97794	2.413	0	0	1.58296	0	1.91364	1.37029	0	1.45159
Gm2788	0	0	0	0	0	0	0	0	0	0	1.40901	1.80462	8.3947	16.0977	16.9819
Gm2862	0	0	0	0	0	0	0	0	0	0	0	0	0	1.01895	0
Gm3235	0	1.01248	0	1.40877	1.29507	1.33375	1.46315	2.23903	0	0	0	0	0	0	0
Gm3287	0	0	1.51504	2.10163	0	0	0	0	0	0	0	0	0	0	0
Gm3336	0	0	0	0	0	0	0	0	0	0	0	0	1.5151	0	0
Gm3448	0	1.09751	0	0	0	0	0	0	0	0	0	0	0	0	0
Gm3625	0	0	1.03198	0	0	0	0	0	0	0	0	0	0	1.20595	0
Gm379	0	0	0	0	0	0	2.42675	3.45455	4.29052	1.89024	0	1.08107	1.14778	1.80914	8.35022
Gm3839	0	0	0	0	0	0	0	0	0	0	0	0	0	3.45153	2.33893
Gm4070	0	0	0	0	0	0	0	0	0	0	0	0	0	0	1.86043
Gm4152	0	0	0	0	0	0	0	0	0	0	0	1.114	0	0	0
Gm4342	0	1.60317	1.20052	1.2444	0	0	0	0	0	0	0	0	0	0	0
Gm4673	0	0	0	0	0	1.07042	1.37303	1.7623	0	1.41603	1.40368	1.77208	4.61609	3.13327	5.13922
Gm4707	0	0	0	1.22165	0	0	0	0	0	0	0	0	0	0	0
Gm4788	0	0	0	0	0	1.36435	1.57296	2.6137	3.93277	8.56203	8.08572	16.1239	36.9718	24.5975	47.3031
Gm4951	0	0	0	0	0	3.24385	6.94688	12.133	9.2536	15.855	13.5033	14.5768	14.1503	11.7582	22.5526
Gm4956	0	0	0	0	0	0	0	0	0	0	0	0	0	4.28817	3.60988
Gm5045	0	0	1.06882	0	0	0	0	0	0	0	0	0	0	0	0
Gm5062	0	0	0	0	0	0	0	2.77321	2.14307	2.2727	1.47428	11.1114	2.16244	3.99249	4.08872
Gm5093	0	0	0	0	0	0	0	0	0	0	1.24769	0	3.89477	1.36844	1.00252
Gm5150	0	0	0	0	0	0	0	0	1.8469	1.91174	0	1.22159	0	0	0
Gm527	0	0	0	0	0	0	0	0	0	0	0	0	0	0	2.68869
Gm5345	0	0	0	1.26942	1.42178	1.56792	1.58129	3.17273	2.16892	2.78159	2.00462	7.36099	4.02252	1.55066	2.1258
Gm5422	0	1.00696	0	0	0	0	0	0	0	0	0	0	0	0	0
Gm5457	0	0	0	0	0	0	0	0	0	0	1.52428	1.13184	0	0	1.08046
Gm5510	0	0	0	0	0	0	0	0	0	0	0	0	0	0	1.19205
Gm5540	0	0	0	0	0	0	0	0	0	0	0	0	0	1.02407	0
Gm5560	0	0	0	0	0	0	0	0	0	0	0	0	1.0676	0	0
Gm5582	0	0	0	0	0	0	0	0	0	0	0	1.01042	0	0	0
Gm5814	0	0	0	1.55686	0	0	0	0	0	0	0	0	0	0	1.21592
Gm5834	0	0	0	0	0	0	0	0	0	0	0	0	2.16199	1.03723	2.86498
Gm5866	0	1.32367	1.05539	0	0	0	0	0	0	0	0	0	0	0	0
Gm5914	0	1.11206	1.24702	0	0	0	0	2.5401	1.17179	0	1.02735	0	0	0	0
Gm5970	0	0	0	0	0	0	0	2.13551	1.51584	1.95807	1.60805	2.11215	1.30565	0	1.9178
Gm6061	0	0	5.68907	2.8858	0	1.30497	0	0	2.23096	1.84736	4.33675	3.52487	2.1049	1.44147	0
Gm6155	0	0	0	1.95419	0	1.38141	0	0	0	0	0	0	0	0	0
Gm6168	0	0	0	0	0	0	0	0	0	0	0	0	1.70355	0	0
Gm6285	0	0	1.19647	0	0	0	0	0	0	0	0	0	0	0	0
Gm6341	0	0	1.01265	0	0	0	0	0	0	0	0	0	0	0	0
Gm6451	0	1.27034	1.02272	0	0	0	0	0	0	0	0	0	0	0	0
Gm6493	0	0	0	0	0	0	0	0	0	0	0	1.09923	0	0	0
Gm6658	0	0	0	0	0	0	0	0	0	0	0	1.43572	0	0	0
Gm6665	0	0	0	0	0	0	0	0	0	0	0	0	5.01753	1.90375	1.02859
Gm6712	0	0	0	1.1019	0	0	0	0	0	0	0	0	0	0	0
Gm6736	0	1.20968	0	0	0	0	0	0	0	0	0	0	0	0	0
Gm6740	0	0	0	0	0	0	0	0	0	0	0	1.03715	0	0	1.07627
Gm6755	0	0	0	0	0	0	0	0	0	0	0	1.065	0	0	1.17352
Gm6829	0	0	1.30424	0	0	0	0	0	0	0	0	0	0	0	0
Gm7153	0	0	0	0	0	0	1.19742	0	0	0	0	0	0	0	0
Gm7399	0	0	10.8733	0	0	0	0	4.7198	0	0	0	0	0	0	0
Gm7599	0	0	0	0	0	0	0	0	0	0	0	0	0	0	1.0095
Gm7628	0	0	0	0	0	0	0	1.4101	1.06455	0	0	0	0	0	0
Gm8194	0	0	0	1.08458	0	0	0	0	0	0	0	0	0	0	0
Gm830	0	0	0	0	0	0	0	0	0	1.51517	1.06318	2.56668	0	0	0
Gm8318	0	0	1.13581	1.25901	0	0	0	0	0	0	0	0	0	0	0
Gm8508	0	1.09941	1.25966	0	0	1.26421	0	0	0	0	0	0	0	0	0
Gm8615	0	1.50589	1.10773	0	0	0	0	0	1.06123	0	0	0	0	0	0
Gm8941	0	0	0	0	0	0	0	0	0	0	0	0	0	3.22915	9.53929
Gm8946	0	0	0	0	0	0	0	0	1.00726	0	0	1.03187	0	0	0
Gm8995	0	0	0	0	0	0	1.08793	1.26305	0	0	0	0	0	0	0
Gm9001	0	0	1.35648	0	0	1.15855	0	2.19614	0	0	1.52067	1.92447	0	0	0
Gm9008	0	1.45446	1.74786	0	0	0	0	0	0	0	0	0	0	0	0
Gm9083	0	1.34037	1.12628	1.15336	1.20496	0	0	0	0	0	0	0	0	0	0
Gm9522	0	0	2.20159	0	0	0	2.56974	0	0	0	0	0	0	0	0
Gm9670	0	0	2.28814	0	1.26856	1.71048	1.1358	0	0	0	0	0	1.97697	0	0
Gm9780	0	1.20061	0	1.12338	1.63558	1.4476	2.94878	2.0977	2.63826	1.87993	1.76873	2.19954	2.37263	0	1.64272
Gm9814	0	0	0	0	1.50898	2.21111	3.41143	4.85071	5.41357	6.97443	6.24193	7.50625	6.79894	5.53013	4.50275
Gm9817	0	0	0	0	0	0	0	0	0	0	0	0	0	1.45152	1.45569
Gm9828	0	0	0	1.27574	0	0	0	1.37319	0	0	0	0	0	0	0
Gm9847	0	0	0	0	0	0	1.07516	0	0	1.05911	0	2.64387	0	0	0
Gm9888	0	0	0	0	1.45652	0	0	0	0	0	0	0	0	0	0
Gm9938	0	0	2.11541	0	0	0	0	0	0	0	0	0	0	0	0
Gm9949	0	0	0	0	1.07323	0	1.01101	0	0	0	0	0	0	0	0
Gm9958	0	0	1.26912	0	0	0	0	0	0	0	0	0	0	0	0
Gnat1	0	0	0	0	0	0	1.15874	3.97404	3.84054	3.87902	4.79379	3.04846	8.01006	6.98647	9.82645
Gng13	0	1.02344	1.00616	0	0	0	0	0	0	0	0	0	0	0	0
Gnpda2	0	1.0545	1.5964	1.29203	0	0	0	1.97676	0	1.02258	1.16403	1.18426	1.13047	0	0
Gp49a	0	0	0	0	0	1.03845	1.33275	0	0	1.09665	1.02824	0	0	0	0
Gpat2	0	0	0	0	0	0	0	0	0	1.11021	0	1.00176	1.22843	0	0
Gpm6a	0	0	0	0	0	0	0	0	1.42628	0	0	0	0	0	0
Gpr12	0	0	0	0	0	0	0	0	0	1.10851	1.09957	0	0	0	0
Gpr135	0	0	0	0	0	0	0	0	0	0	1.43464	1.08094	0	0	0
Gpr137b	0	1.05128	1.14822	1.10391	1.25176	0	0	1.12461	1.01423	1.26883	0	0	0	0	0
Gpr157	0	0	0	0	0	0	0	0	0	0	0	1.14245	0	0	0
Gpr160	0	0	0	0	0	1.11509	0	1.06935	0	0	0	0	0	0	0
Gpr4	0	0	0	0	0	0	0	0	1.14843	1.15697	0	0	0	0	0
Gpr65	0	0	1.34439	1.58415	0	1.52658	2.24049	2.27677	2.47467	2.89944	1.80916	1.44841	0	0	0
Gpr84	0	0	0	0	1.1637	1.44175	1.33451	1.3594	0	0	0	0	0	0	0
Greb1l	0	0	0	0	0	0	0	0	0	1.17304	1.15881	1.75906	0	0	0
Grem2	0	0	0	0	0	1.63168	2.70951	1.70488	2.15692	3.64976	4.1478	5.45147	4.73343	1.04472	0
Grhl1	0	0	0	0	0	0	0	0	0	0	0	0	1.65458	0	0
Grip1	0	0	0	0	0	0	0	0	1.10929	1.27497	0	0	0	0	0
Grk4	0	0	0	0	0	0	0	0	0	0	0	0	1.08194	0	0
Gsap	0	0	0	0	0	1.02713	1.60009	1.37186	1.8423	2.40264	3.00509	3.16046	7.54537	5.07642	4.46134
Gspt2	0	0	0	0	0	0	1.04734	1.08765	0	0	0	1.14851	0	0	0
Gsta1	0	0	0	0	0	0	0	0	0	0	0	0	3.69558	3.24399	1.87662
Gsta2	0	0	0	0	0	0	0	1.5974	1.04311	1.54089	4.59115	1.68843	41.202	12.5188	1.80271
Guca1a	0	0	0	0	1.35657	0	0	0	0	1.06372	0	1.56533	1.09943	1.57774	1.66208
Gucy2c	0	0	0	0	0	0	0	0	0	0	0	0	1.49915	0	0
Gvin1	0	0	0	0	0	0	0	0	0	0	0	0	0	0	1.85864
Gzma	0	0	0	1.56512	2.27901	4.61134	7.69744	19.8815	17.4516	7.5786	4.16791	3.76744	1.23906	0	0
Gzmb	0	0	0	0	0	1.18624	2.59444	3.98404	4.21747	2.93329	3.11679	2.49232	0	0	0
H19_1	0	0	0	0	4.00042	5.35118	7.06042	3.38401	0	0	0	0	0	0	0
H2-Aa	0	0	0	1.92978	2.63332	2.57722	4.14774	10.7068	18.3957	18.4032	16.8337	8.97949	10.4551	9.92443	9.08845
H2-Ab1	0	1.86695	1.22438	2.66023	6.24599	5.81145	5.7402	14.3313	24.2265	25.174	21.2708	10.589	11.3626	14.3918	13.1109
H2-DMb1	0	0	0	0	1.11948	1.30378	1.32917	3.14242	2.96624	2.74404	2.47187	2.7377	1.65308	1.83708	1.16354
H2-DMb2	0	0	0	0	0	0	0	1.7614	1.68474	0	0	0	0	0	0
H2-Eb1	0	0	0	1.15322	2.15647	2.47269	1.84135	8.14633	14.9585	17.6909	14.0826	7.6929	6.25416	9.11326	7.81302
H2-M3	0	0	0	1.38763	1.36326	1.42533	2.53745	3.88784	3.54428	4.17199	2.2132	3.04306	2.43121	1.52546	1.43057
H2-Ob	0	0	0	0	0	0	0	0	0	1.00688	0	0	0	0	0
H2-Q1	0	1.21502	1.28351	0	3.29564	0	4.41191	5.56062	5.46435	7.91174	10.2952	11.4383	22.64	22.1706	14.7908
H2-Q2	0	0	0	0	0	0	1.56428	1.60801	0	1.44232	1.56726	2.1391	1.67157	0	0
H2-T10	0	0	0	0	0	0	0	0	0	0	0	1.11943	1.20971	0	1.13343
Hal	0	0	0	2.26253	3.82041	4.66158	7.37223	8.83855	14.5504	13.6366	12.5609	8.25271	50.957	96.0717	49.5961
Hamp2	0	0	0	0	0	0	0	2.83184	4.05966	2.25769	1.64178	0	1350.26	27.6376	9.6144
Hao2	0	0	1.87666	4.73589	6.90298	16.1587	13.117	14.7755	32.8475	41.8379	48.2853	30.443	41.7583	0	0
Hap1	0	0	0	0	0	0	1.20735	1.64112	1.57023	1.10651	0	2.27695	1.04795	0	0
Hapln4	0	0	0	0	0	0	0	0	0	0	0	0	0	3.90105	3.78071
Hebp2	0	0	0	0	0	0	0	0	0	1.22298	1.4067	2.62654	1.43136	0	0
Hectd2	0	0	0	0	0	0	0	0	0	0	0	0	0	1.13281	1.49056
Hey1	0	0	0	0	0	0	0	0	0	0	0	1.10912	0	0	0
Heyl	0	0	0	0	0	0	0	0	1.45433	2.19986	2.51649	1.43669	0	0	0
Hhip	0	0	0	0	0	1.3923	0	2.0592	0	0	0	0	0	0	0
Hid1	0	0	0	0	0	0	0	0	0	1.47919	1.18028	1.07832	0	0	0
Hist1h2af	0	2.05625	3.29363	2.67956	1.86179	1.95171	0	0	0	0	0	0	0	0	0
Hist1h2al	0	0	0	0	0	0	0	1.66862	1.00656	0	0	0	1.97337	3.27543	1.82195
Hist1h2be	0	0	0	1.02159	0	0	1.15173	0	0	0	0	0	0	1.16321	1.12653
Hist1h2bf	0	1.47843	1.32906	2.74289	2.54481	2.02037	1.30319	0	1.51064	0	0	0	1.05355	2.02557	2.18672
Hist1h2bl	0	2.98136	1.66069	2.72922	1.72815	0	0	0	0	0	0	0	0	0	0
Hist1h2bp	0	2.6706	0	1.56266	0	1.04864	0	0	0	0	0	0	0	0	0
Hist1h4j	0	1.40872	0	1.9406	0	0	0	0	0	1.07705	0	0	0	0	0
Hmgb1-ps8	0	0	0	0	0	1.58249	1.20567	1.85393	0	0	0	0	0	0	0
Hmgb1-ps9	0	0	1.0375	0	0	0	0	0	0	0	0	0	0	0	0
Hnmt	0	0	0	0	0	0	0	0	0	0	0	1.15475	2.37128	3.30898	3.40691
Homez	0	1.15215	0	0	0	1.3291	0	1.28984	0	1.08837	0	0	0	0	1.55431
Hopx	0	0	0	0	3.43199	13.0268	6.46386	3.66414	2.37989	0	1.414	0	13.1461	46.535	63.4181
HOTAIRM1_2	0	0	0	0	0	0	0	0	0	0	0	0	1.19106	0	0
HOTAIRM1_4	0	0	1.38502	0	1.13495	0	0	1.04281	0	0	1.03976	1.4192	0	0	0
Hpgds	0	0	0	1.13415	0	1.0674	1.12124	1.60834	1.36084	1.67378	1.22727	0	0	0	0
Hs3st6	0	0	0	0	0	0	0	0	0	0	1.09817	0	0	2.23005	1.38753
Hsbp1l1	0	0	0	0	0	0	2.27686	1.91536	1.21592	1.50405	0	5.84322	2.03568	0	1.27768
Hsd3b2	0	0	0	0	0	5.38133	3.58611	8.27635	6.87743	13.0895	14.2721	11.7308	9.34073	8.94215	7.04598
Hsd3b3	0	0	1.16791	4.68622	10.7643	24.9559	54.12	50.8691	74.9878	105.082	102.179	88.8236	103.482	152.996	68.965
Hsd3b5	0	0	0	0	0	0	0	0	0	2.39984	2.64945	0	0	267.439	102.333
Hsf4	0	0	0	0	0	0	0	0	0	0	0	0	2.79046	4.2756	3.00279
Hsp25-ps1	0	0	0	0	0	0	0	0	0	0	0	0	0	1.49861	1.78878
Hspb9	0	1.41414	0	0	0	0	0	0	0	0	0	0	0	0	0
Htra1	0	0	0	0	0	0	0	0	1.03471	1.50497	1.02335	0	1.11577	0	0
Htra3	0	0	0	0	0	0	0	1.66855	1.29767	1.20505	1.1878	1.17725	0	0	0
Hykk	0	0	0	1.66284	1.51028	1.95457	3.81253	5.85274	5.66637	8.32865	7.33629	13.5861	6.50722	3.08392	3.33915
Id4	0	0	0	0	0	0	0	0	1.29065	1.28267	1.56774	0	1.17149	0	0
Ido2	0	0	0	0	0	0	0	0	1.00573	1.72071	2.01019	0	11.4993	32.4299	18.2084
Ifi203	0	0	0	0	0	1.90047	4.48788	2.49558	2.78753	3.64595	3.05355	4.53348	2.46628	0	1.09931
Ifi204	0	0	1.52601	2.26112	1.27833	2.55942	9.25917	6.78726	4.65087	5.22834	3.9516	5.5404	3.33091	1.21884	2.07277
Ifi205	0	0	0	0	0	0	1.66179	1.53098	1.81699	1.81472	1.20778	1.27701	0	0	0
Ifi27l2a	0	1.50627	1.72837	2.73831	1.28992	6.48357	18.6157	15.3345	12.1375	14.3957	8.99733	15.4243	8.92003	14.4321	14.4116
Ifi27l2b	0	0	0	0	0	0	0	0	0	0	0	5.61644	1.88624	2.37668	2.98514
Ifi44	0	0	0	0	0	0	1.77165	0	0	1.16238	0	0	0	0	0
Ifih1	0	0	1.64795	1.39955	0	1.63498	3.83434	2.55948	3.23122	4.13705	2.99727	3.20874	3.11087	0	3.56971
Ifit1	0	0	0	0	0	0	5.17229	3.98841	2.93252	1.9523	2.5816	1.93878	1.37613	2.30267	3.70342
Ifit3	0	0	0	0	0	1.72497	13.7426	10.8351	7.71317	8.61762	7.08146	12.4605	5.88515	7.167	6.59715
Ifitm5	0	0	0	0	0	0	0	0	0	0	0	1.22202	0	0	1.12074
Igfbp6	0	0	0	1.13879	1.25136	1.19745	2.12997	3.89843	3.17697	2.03977	0	2.33742	2.43752	0	0
Igha	0	0	0	0	0	0	0	0	0	0	0	0	0	1.13366	1.89963
Ighj1	0	0	0	2.20695	2.4158	1.61286	1.79802	2.95705	2.00978	0	0	0	0	0	0
Ighj3	0	0	0	0	1.25504	2.37847	1.12903	2.0388	1.24658	0	0	0	0	0	0
Ighj4	0	0	0	0	2.25353	1.52987	3.52664	3.20562	3.67166	2.34005	0	0	0	0	0
Ighv10-1	0	0	0	0	0	0	0	0	1.00971	0	0	0	0	0	0
Ighv1-26	0	0	0	0	0	0	0	0	1.1394	0	0	0	0	0	0
Ighv14-2	0	0	0	0	0	0	0	1.10975	0	0	0	0	0	0	0
Ighv3-6	0	0	0	0	0	0	0	0	1.15098	0	0	0	0	0	0
Ighv5-4	0	0	0	0	0	0	0	0	1.07487	0	0	0	0	0	0
Igkc	0	1.31323	0	0	0	4.90133	17.7787	60.308	50.5801	22.8136	15.123	8.01591	7.47599	6.97383	5.54963
Igkj1	0	0	0	0	0	0	1.56836	4.65231	0	2.64242	1.16362	0	0	0	0
Igkj2	0	0	0	0	0	0	0	0	3.68574	2.88915	0	0	0	0	0
Igkj3	0	0	0	0	0	0	0	1.01211	0	0	0	0	0	0	0
Igkj4	0	0	0	0	0	0	0	4.33413	3.75448	0	1.41734	0	0	0	0
Igkv1-135	0	0	0	0	0	0	0	1.73229	1.37139	1.40368	0	0	0	0	0
Igkv19-93	0	0	0	0	0	0	0	1.6478	1.06564	0	0	0	0	0	0
Igkv2-137	0	0	0	0	0	0	0	0	1.04815	0	0	0	0	0	0
Igkv6-32	0	0	0	0	0	0	0	1.23931	1.23021	0	0	0	0	0	0
Igkv7-33	0	0	0	0	0	0	0	0	0	1.54619	0	0	0	0	0
Igkv8-27	0	0	0	0	0	0	0	0	1.18246	0	0	0	0	0	0
Igkv8-30	0	0	0	0	0	0	0	0	1.02672	0	0	0	0	0	0
Iglc2	0	0	0	0	0	0	0	1.03507	2.21608	0	0	1.21807	0	0	0
Igll1	0	0	1.16341	4.32142	7.91165	16.9337	11.4442	4.95357	2.40708	3.02581	3.73376	0	0	0	0
Iglv1	0	0	0	0	0	0	0	1.53754	3.43935	2.53399	1.65427	1.11498	0	0	0
Igsf11	0	0	0	0	0	1.00766	0	2.14846	2.26327	3.49528	4.79157	5.20892	4.45793	3.71574	3.96381
Igsf23	0	0	0	0	0	0	0	0	0	0	0	1.68632	0	0	0
Igsf5	0	0	0	0	0	1.37606	2.68268	11.5084	7.8151	7.12638	8.23257	10.8063	5.34635	6.8762	7.38343
Iigp1	0	0	0	0	0	4.87124	30.7584	57.9907	38.1619	53.6689	36.148	70.5497	32.1711	25.1195	59.8319
Il11ra2	0	0	0	0	1.08863	1.11801	0	0	0	0	1.0589	0	1.1998	1.16915	0
Il15	0	0	1.06127	1.23494	1.13932	1.45643	1.52305	1.40354	1.62796	2.33534	2.69064	2.2186	1.43663	0	0
Il15ra	0	1.06793	1.42276	3.12893	3.0122	6.14916	10.4805	4.14069	8.3923	9.04796	7.72487	12.6407	4.18606	3.89821	7.92012
Il17rb	0	0	0	1.60168	3.01576	4.42419	4.17488	4.39228	9.74627	8.97055	14.3374	10.4366	4.15932	2.20269	2.62846
Il18rap	0	0	0	0	1.26547	1.25776	1.10385	1.62844	0	0	0	0	0	0	0
Il1b	0	0	0	0	0	0	0	0	4.10439	4.66123	2.325	1.42331	0	0	1.08012
Il1f9	0	0	0	0	0	0	1.01597	0	0	0	0	0	0	0	0
Il1r2	0	0	0	0	0	0	1.65106	0	0	0	0	0	0	0	0
Il1rap	0	0	0	0	0	1.06651	3.50395	4.61997	6.36301	9.88954	8.68689	9.75434	9.06602	6.37343	27.8907
Il1rn	0	0	1.77273	4.98731	4.0057	4.7366	6.79326	3.11592	6.41651	3.94732	3.09213	9.71601	0	0	3.65757
Il20rb	0	0	0	0	0	0	0	1.62979	0	0	0	0	0	0	0
Il22ra1	0	0	0	0	0	0	0	0	0	1.10626	0	1.15274	1.46154	0	1.20179
Il2rb	0	0	0	0	0	0	0	1.53786	1.82151	2.31169	1.77712	1.43919	1.09076	0	0
Il33	0	0	0	0	0	0	0	0	0	1.1858	0	0	0	0	0
Il34	0	0	0	0	0	0	0	0	0	0	0	0	1.28703	1.61109	1.01483
Il4i1	0	1.40053	1.00349	1.25835	1.14923	0	0	1.71321	1.33064	1.48918	1.54093	0	0	0	0
Il7r	0	0	0	0	0	1.20789	1.65255	1.87119	0	0	0	0	0	0	0
Ildr2	0	0	0	0	0	0	0	0	0	0	0	0	3.54018	2.09486	2.8359
Inca1	0	0	0	1.46009	1.01197	1.06764	2.2947	6.01995	4.27225	5.50685	6.97377	11.0838	11.4653	7.76595	7.44226
Inhba	0	0	0	0	1.59596	6.43729	6.78811	3.38804	4.39542	5.25572	6.89214	6.14343	2.43384	2.20185	1.83681
Inhbb	0	0	0	0	0	0	0	2.14139	9.75535	16.8578	11.3615	29.4205	0	0	0
Inhbe	0	0	1.15653	1.09125	2.31538	2.53134	18.1349	51.4999	25.7231	38.3919	60.2516	30.8648	1.60355	16.8936	12.4335
Inpp4a	0	0	0	1.17065	0	0	2.69053	0	1.3994	1.6212	0	0	0	0	0
Ins2	0	0	0	0	0	0	0	1.78097	0	0	0	0	0	0	0
Invs	0	0	0	0	0	0	0	0	0	0	0	0	0	0	1.27599
Iqca	0	0	0	0	0	0	0	0	0	0	0	1.37448	0	0	0
Iqcg	0	0	0	0	0	0	0	0	0	0	1.16901	2.89724	1.08246	0	0
Irak1bp1	0	0	0	0	0	0	0	0	0	0	0	1.19658	1.04268	0	0
Irak3	0	0	0	0	1.07738	0	0	0	0	0	0	0	0	0	0
Irf4	0	0	0	0	0	0	1.28812	2.01957	1.11431	0	0	0	0	0	0
Irf6	0	0	0	1.17472	1.0493	1.81361	5.16624	5.55239	5.53462	6.23853	4.94028	7.80067	7.73704	6.56215	4.93511
Itga1	0	0	1.01778	1.56659	1.11374	1.32593	1.95827	1.35186	2.64085	3.34179	3.0599	2.812	2.3103	0	1.09292
Itga10	0	1.07418	0	0	0	0	0	0	0	0	0	0	0	0	0
Itga7	0	0	0	0	0	0	0	0	1.1288	1.10082	1.1222	2.18388	2.6144	1.92202	2.37052
Itga8	0	0	0	0	0	0	0	0	1.14151	1.67809	0	0	0	0	0
Itgax	0	0	0	0	0	0	0	0	0	1.06143	0	0	0	0	0
Itgb2l	0	0	0	1.83092	4.73198	6.71999	5.80371	6.12927	3.52435	3.89991	2.47934	0	0	0	0
Itpr2	0	0	0	0	0	0	0	0	2.9904	3.265	0	4.00988	3.05275	0	0
Jam2	0	0	0	0	0	1.02274	1.75985	1.71987	3.29411	3.52999	3.34682	3.16967	2.50949	1.14949	1.43021
Jazf1	0	0	0	1.02537	1.2387	1.72425	1.32221	1.63188	1.80057	2.87682	1.79062	1.74842	0	0	0
Jpx	0	0	0	0	1.0837	0	0	0	0	0	1.04654	0	1.32691	0	0
Kansl1l	0	0	0	0	0	1.51909	0	0	1.39682	1.5698	1.79635	1.38605	0	0	0
Kat6b	0	0	0	0	1.18917	0	0	0	0	0	0	0	0	0	0
Kazald1	0	0	0	0	0	0	0	0	0	0	0	0	1.48479	0	0
Kcnc3	0	0	0	0	0	0	0	0	0	0	0	0	1.88894	1.16098	1.30609
Kcnip2	0	0	0	1.2953	0	0	0	0	0	0	0	0	0	0	0
Kcnk12	0	1.28415	0	0	1.51694	0	0	1.08853	0	0	0	0	0	0	0
Kcnn1	0	0	0	0	0	0	0	0	0	0	0	0	0	1.53922	0
Kcnn2	0	0	0	0	0	0	0	0	0	0	0	1.07031	2.18962	2.36707	2.30714
Kctd21	0	0	0	0	0	0	0	0	1.10673	0	1.09558	1.39339	1.1839	2.14726	2.11019
Keg1	0	0	0	3.16874	1.83619	12.0233	5.0998	3.34474	9.30576	16.0201	11.3582	4.4789	17.2946	118.218	79.0477
Kiss1	0	0	0	0	0	1.31433	0	1.56581	0	1.63758	1.90066	1.3616	1.70582	0	0
Klc3	0	0	0	0	0	0	1.29055	0	0	0	0	0	0	0	0
Klf12	0	0	1.18652	0	0	0	1.12285	0	1.55992	1.64981	0	2.10178	1.18717	0	0
Klf4	0	0	0	0	1.87507	0	0	2.00329	1.3474	1.3736	0	1.08174	0	0	0
[truncated: 13,062 more rows]

## Sheet: Sheet2
Phase(RNA)		1	1	1	1	1	1	1	2	2	2	2	3	3	3	3
GeneSymbol	FDR	E12.5_R	E13.5_R	E14.5_R	E15.5_R	E16.5_R	E17.5_R	E18.5_R	D1_R	D3_R	D5_R	W1_R	W2_R	W3_R	W6_R	W8_R
Pacrgl	0.359365	5.02128	3.61465	3.55716	3.17983	1.85784	2.01143	2.36693	3.06577	1.90567	1.93068	2.36256	3.20831	2.30286	1.22557	2.45051
A2ml1	0.439728	0	0	0	1.54109	2.78428	5.22761	2.59038	1.29314	1.82682	2.02367	1.93509	3.48801	2.06969	2.39377	3.94059
Abhd18	0.0140676	0	0	0	1.05697	0	1.74562	1.80263	1.13792	1.79065	2.6757	2.79585	3.11401	3.22688	1.90356	1.95506
Abitram	0.0101075	4.61677	4.72516	3.13953	2.73657	2.34066	1.45083	1.4563	1.228	1.55665	1.34967	0	0	1.02038	0	0
Abraxas1	0.0174753	6.49573	4.31971	6.21223	5.6269	3.32765	3.82494	3.61587	3.54698	3.76779	2.54469	2.75144	3.07239	2.93696	1.5429	1.70733
Abraxas2	0.404134	7.81194	5.02229	7.47734	5.91587	5.05637	5.73313	5.37826	6.04393	5.94808	7.10525	5.98867	6.20154	5.91893	4.4821	4.66288
Ackr1	0.000153574	26.3722	33.2998	32.5697	29.6174	27.6165	22.3391	13.782	5.13845	5.79924	2.55135	2.69631	1.76022	0	1.17635	0
Adgra2	0.021381	6.96744	5.06908	2.95723	2.7405	3.71423	2.84345	3.8391	4.31956	4.6003	5.18678	3.95436	2.92356	1.8259	1.02004	0
Adgra3	0.551174	9.88536	8.4725	6.99795	5.1205	3.57782	2.52926	2.36725	3.23207	4.04946	5.28853	4.2927	4.10855	4.10926	4.74221	3.91382
Adgre1	0.0198404	5.53551	6.85639	8.94339	10.5006	12.9348	12.5346	13.374	11.7888	14.2254	20.8143	9.07508	5.77468	4.86734	5.98244	2.53235
Adgre4	0.000436012	0	0	0	0	0	0	0	2.36485	3.65598	4.1986	2.60704	2.15572	1.78795	0	1.04266
Adgre5	0.00480403	5.84584	8.09758	6.73704	8.21219	14.3711	9.8874	11.1114	16.3303	16.8691	18.3678	12.8381	10.8024	7.52261	6.33286	5.59868
Adgrf1	0.0273482	0	0	0	0	0	0	2.02137	0	2.59978	3.72478	1.78653	3.6167	2.75327	2.65747	1.04951
Adgrf5	0.0220634	2.62588	1.54996	1.79557	1.96451	1.48437	1.89101	2.11804	3.44837	3.21634	4.50212	3.7991	3.96451	3.74756	1.78608	1.29956
Adgrg1	0.00403252	49.1986	60.4729	43.5315	36.3172	35.8095	18.2564	19.5555	20.3125	17.4243	14.8291	13.2216	9.08629	1.92828	0	0
Adgrg2	0.465785	0	0	0	0	0	0	0	1.30613	0	0	0	1.68891	0	0	0
Adgrg3	0.0273119	4.87578	3.98491	3.33894	4.09447	5.58765	5.39135	5.91818	6.906	4.2958	4.21571	3.25244	2.92705	3.60097	1.04286	1.13172
Adgrl1	0.21032	6.75098	5.55438	3.48338	3.62168	2.44973	2.16863	2.49735	2.72233	2.81094	2.52348	2.66657	4.65244	2.02471	0	0
Adgrl2	0.00772509	2.93886	1.85601	1.62158	1.60213	2.04994	2.86407	2.75791	3.09194	4.65541	5.98468	4.42584	3.717	3.08495	4.02671	5.46769
Adgrl4	0.205714	2.84583	1.03411	1.3541	1.09523	0	1.12355	1.01099	1.78171	1.94861	3.05267	2.60603	2.5405	2.08582	0	0
Adgrv1	0.325815	0	0	0	0	0	0	0	0	0	0	0	1.21367	0	0	0
Afdn	0.112687	6.75225	5.61052	4.22942	2.23119	2.98958	2.24705	2.59871	5.6066	2.72605	3.64085	3.63054	11.124	4.23426	3.70723	11.1179
Afg1l	0.00912692	2.0249	1.55372	1.61222	1.51539	1.40504	1.7295	1.78718	1.17153	2.21612	1.90119	2.7158	2.52574	2.67874	3.15119	2.54348
Albfm1	0.00625626	0	0	0	1.95237	1.66705	4.03505	6.6081	17.5937	21.1546	36.9555	36.6394	51.5235	25.675	19.3322	10.6574
Angptl8	0.940513	9.88928	9.94023	14.0069	28.4973	45.3704	47.8231	152.52	43.3704	48.3462	44.4582	71.0956	29.2465	32.4291	66.6659	45.9468
Aopep	0.242249	1.42217	1.27127	1.40865	1.38481	1.19478	1.70726	1.91541	1.78792	1.69295	1.63612	2.05467	1.85124	2.87735	1.27502	1.7151
Arhgap35	0.00188426	4.06781	4.13658	3.81806	3.9561	4.60836	4.60158	4.39883	4.45159	6.31497	7.68316	6.36696	6.10859	7.27733	8.98937	8.56067
Arhgap45	0.000240667	18.7327	18.2056	15.4478	15.8255	19.6806	20.6729	18.1124	18.7459	13.5178	11.6052	8.92935	6.00447	3.51716	1.92416	2.38504
Armh3	0.230356	2.95537	3.97526	2.614	2.60636	2.82807	2.53805	1.84462	2.65903	2.48513	3.57839	2.94206	2.1985	2.80629	2.16075	1.43927
Armt1	0.0350007	10.414	9.15828	7.43953	6.1602	5.31012	3.45554	5.3296	5.889	5.65922	4.49382	4.34767	2.44487	2.95352	3.49179	3.16426
Arpin	0.462726	2.61665	3.46433	2.3421	2.85825	1.75186	2.22168	1.85583	1.55511	2.73197	3.44868	4.2427	2.53999	2.26688	3.38219	4.06995
Atg101	0.0383585	19.6051	24.6354	16.2457	14.2351	17.7308	14.5927	16.0694	18.9682	18.7469	17.6446	22.0498	24.5559	36.0121	37.9315	17.283
Atp23	0.0176638	7.11797	6.28697	5.28663	4.53958	3.78034	4.40596	2.76559	2.9852	3.18363	3.54128	2.35286	2.18334	2.83815	2.82699	1.19713
Atp5md	0.519554	258.801	232.651	258.546	244.541	220.879	252.324	259.296	229.767	257.179	210.108	259.768	233.075	356.863	247.878	234.461
Atp5mpl	0.917836	179.362	163.319	207.976	177.611	151.923	184.176	161.827	175.069	180.603	138.399	182.548	207.858	231.442	149.456	123.847
Atpsckmt	0.698318	7.22198	5.9654	6.88335	4.55582	4.41626	4.6737	5.95929	6.22983	5.50485	5.36637	7.22432	7.13517	6.8749	6.39661	4.55161
Azin2	0.293338	0	0	0	0	0	0	0	1.24728	0	1.62897	1.72812	4.65331	0	0	0
B3glct	0.0024138	3.4752	3.52568	3.61709	2.71582	2.11526	1.81419	1.36612	1.4047	1.01529	1.19459	1.14666	1.00605	0	0	0
B4gat1	0.00634979	7.4184	7.66541	5.83252	4.98834	5.48865	5.57005	6.22657	7.22857	7.5203	11.154	9.20613	10.0916	10.7295	12.288	8.09078
Babam2	0.302549	15.7924	20.2893	14.8477	9.79229	15.1888	10.9993	9.71415	9.75527	12.7694	8.79798	11.0862	10.2836	6.6559	15.7552	9.82451
Bclaf3	0.0144128	3.3653	1.31877	2.64855	3.1146	1.04117	1.35288	0	0	0	0	0	0	0	0	0
Bco1	0.00262453	6.15813	5.14421	4.75728	5.61184	3.03826	4.44015	4.59818	9.92777	13.0368	12.6253	15.2343	10.74	7.11369	2.24328	3.50867
Bex3	0.000120207	194.264	180.552	178.508	184.111	149.752	150.499	112.756	118.58	115.53	77.1284	93.6326	37.78	11.6448	1.68096	1.74517
Bicdl1	0.369869	1.29046	1.142	1.62568	0	1.12926	0	0	1.07051	2.01327	1.04999	1.33309	1.42577	1.3912	0	0
Bicra	0.0023471	3.58417	4.03276	2.71562	2.91232	3.20302	2.79551	2.36145	2.69965	2.64416	2.39931	2.1775	1.63308	1.20426	0	1.48556
Bicral	0.00252976	3.37629	3.38307	3.44912	3.79634	3.11289	2.5636	2.05319	1.92173	1.87268	2.3645	1.8323	1.70802	1.79916	1.42884	1.65597
Bmt2	0.371033	1.93018	0	1.52263	1.63378	1.10269	1.61334	1.47676	1.82666	1.69237	1.91429	1.37785	1.71381	1.4031	0	1.02566
Borcs5	0.652595	4.61669	7.10121	4.66103	4.18489	3.70593	2.74075	3.12012	3.55338	4.26377	3.3303	2.60386	2.06089	3.69572	6.86881	4.31363
Borcs6	0.488149	6.46858	9.4631	5.92421	5.11069	7.48363	8.85149	7.82625	8.12307	6.12307	5.83419	6.55413	5.98343	7.0499	6.77266	5.2698
Borcs7	0.759487	3.83527	3.23773	3.42161	3.3769	2.87502	3.24632	2.57177	4.21405	2.99595	3.13639	3.6359	3.52168	4.62364	1.98724	2.30365
Borcs8	0.0527523	14.055	17.7069	21.5154	8.3255	13.8175	7.78334	11.13	8.32923	9.10135	5.98145	9.8501	6.66666	6.961	8.58462	6.2256
Bud23	0.126667	30.5175	39.5183	44.9345	21.9188	17.1664	21.3472	16.9138	16.5756	17.9873	15.6021	23.4373	9.6039	20.6901	19.4006	11.5538
C1qtnf12	0.000848297	33.6636	63.2207	60.8577	61.0157	54.6204	38.7339	27.4878	26.2304	19.992	10.1532	7.93912	3.39094	1.28764	0	2.16367
C1s1	0.00255345	12.2381	9.98677	21.0257	34.9365	46.191	70.6785	75.5292	72.0231	109.687	154.886	136.101	152.21	102.345	111.77	128.967
C1s2	0.00301953	0	0	0	0	0	0	0	0	1.55054	2.24139	1.73018	2.45947	1.13028	1.8127	1.50583
C9orf72	0.274507	1.60255	1.31574	2.2168	1.49964	1.52698	2.35418	2.69426	2.70777	2.3459	2.48494	2.07127	2.94776	2.46436	1.22493	4.55982
Cabcoco1	0.223825	0	0	0	0	0	1.48312	1.92986	1.69915	1.76223	2.05573	1.87104	5.24643	3.07644	0	0
Calhm6	0.0331211	0	0	0	1.22454	1.11239	0	1.7075	2.68126	1.76784	1.4851	1.84409	1.05318	1.04199	2.12974	1.0072
Card19	0.43738	7.31838	9.82483	7.20705	7.87277	11.6822	11.609	11.0411	16.3386	11.0265	8.69351	10.6611	9.59942	14.3305	10.4029	8.89071
Carmil1	0.329495	0	0	0	0	0	0	0	0	0	0	0	0	0	0	1.27354
Carmil2	0.00915775	3.05137	2.83327	2.83174	2.43221	2.87662	4.67213	4.14236	5.99567	2.4082	1.40301	1.62609	0	0	0	0
Carmil3	0.103028	2.43378	1.70691	1.21559	1.06485	0	0	0	0	0	0	0	0	0	0	0
Carnmt1	0.0248487	19.7521	12.2035	16.816	13.9222	7.42977	6.00904	5.9071	4.92375	5.95161	5.43128	4.55542	4.41841	3.93884	2.9237	3.47764
Castor1	0.0980767	1.8207	2.20418	1.93581	1.5202	2.00818	1.18075	0	1.35508	2.14147	1.68651	1.31275	1.15847	0	0	1.08162
Cavin1	0.00393951	12.7062	9.1537	9.67949	9.79831	16.1593	16.7291	15.5784	11.2884	11.782	11.0522	8.8882	7.22202	4.84189	1.82282	1.28008
Cavin2	0.0451726	13.1637	7.90662	10.4336	10.2535	7.1508	7.26463	8.11573	11.6521	9.92703	12.6933	9.41408	8.85139	8.34785	1.75657	1.45275
Cavin3	0.0129602	6.06378	6.94528	3.65265	2.68952	4.56712	3.25652	4.61614	3.68282	5.29147	5.05979	3.98538	2.41451	2.2485	1.05181	0
Cbarp	0.00396349	2.54494	2.64001	1.64821	1.36602	1.56032	2.05838	0	0	0	0	0	0	0	0	0
Ccdc186	0.0642314	2.89936	1.15806	3.14279	3.01224	1.51077	2.09666	2.06754	1.87477	1.6398	1.41056	1.6501	1.68574	1.20614	0	1.32833
Ccdc189	0.0103794	4.92902	4.84594	5.80178	4.87071	4.33085	4.22072	4.48099	4.80906	2.65452	2.42245	2.12886	2.96285	3.30987	3.32635	3.68586
Ccdc191	0.465031	2.10841	0	1.49485	1.58239	1.31672	1.83329	1.29011	1.60936	1.04853	1.08642	0	1.96246	1.10815	0	0
ccdc198	0.328029	0	0	0	0	0	0	0	0	0	0	1.03936	0	0	0	0
Ccdc92b	7.53467e-05	24.6541	31.1522	29.7272	26.9434	32.0874	25.6033	14.8956	6.08556	6.1287	1.99218	1.68406	0	0	0	0
Ccdc9b	0.0128523	0	0	0	0	0	0	1.03655	1.62836	1.25012	1.23597	1.12296	1.2408	1.04108	0	0
Ccn1	0.343676	7.78091	6.97708	3.65112	7.23498	4.6908	4.97463	8.92003	2.32822	5.55425	8.64246	7.71076	6.2548	2.79307	3.5638	4.25894
Ccn2	0.752807	3.22759	1.89307	1.48779	1.1741	1.59342	1.383	2.98598	1.78725	1.46506	3.27831	2.34511	3.44746	5.65857	0	1.56261
Ccnq	0.0590689	17.9269	16.3892	13.2667	13.0592	8.68233	8.53657	7.4576	11.9214	8.4961	7.3529	8.60721	8.50163	6.67401	5.32454	4.59201
Ccpg1os	0.000613439	0	1.04127	0	1.00187	0	0	1.00165	1.64151	1.15842	1.70925	1.1391	3.74636	2.99971	3.00666	2.03974
Cd300c2	0.0393234	2.15351	2.59663	3.94315	4.39086	5.66807	6.19361	9.13633	9.65528	8.82797	8.31392	6.50966	5.86986	4.52584	3.85878	3.18935
Cebpzos	0.563021	6.50715	6.97863	8.34675	7.71768	6.92526	6.85801	5.99064	6.82273	7.42137	7.78911	10.1122	9.97011	8.90213	6.69921	5.25664
Cemip2	0.00712226	5.54263	3.70346	3.59702	3.49201	3.33414	4.0499	4.06128	3.41231	4.30215	3.86444	2.9829	2.83012	2.26894	0	0
Cenps	0.00399156	9.90933	11.9068	11.5903	10.1216	6.73297	5.07084	3.88302	2.888	5.08228	2.31409	3.98934	1.61247	2.20383	0	0
Cenpu	0.00283724	6.43996	4.70814	6.72	5.80896	4.09661	2.58495	2.38633	2.37046	2.98816	1.91587	1.76927	1.07957	0	0	0
Cenpx	0.0535444	66.1599	79.8682	68.73	55.6424	51.255	45.7318	32.7095	38.5178	34.7283	33.6006	36.7314	32.8411	41.5944	52.2918	36.6924
Cep131	0.0379936	5.68553	4.66055	3.74577	3.4843	3.3296	3.06284	2.72633	3.59218	2.5345	1.95338	2.54041	3.03836	2.33569	1.418	1.1788
Cep162	0.375985	1.10382	0	1.46778	0	0	0	0	0	0	0	0	0	0	0	0
Cep295	0.0106207	3.88004	1.06804	3.87313	3.7759	1.16575	2.13573	1.56393	1.48718	1.29063	1.52539	1.07359	0	0	0	0
Cep83	0.0393746	10.0319	3.02936	9.21804	9.76599	2.52154	5.29478	4.20862	3.50369	3.43131	2.9476	2.77581	2.83124	1.91645	0	1.45026
Cfap126	0.581246	1.55707	1.65795	0	1.10418	1.18102	0	1.23232	0	0	0	1.81785	0	1.04255	1.30647	1.39034
Cfap20	0.915517	18.3368	16.5261	17.2142	16.3987	11.9911	10.9345	10.3086	14.5593	15.8142	18.3532	14.5936	28.1838	11.6356	11.0851	6.38005
Cfap298	0.106433	24.8454	23.1772	21.4342	14.8982	11.7708	9.72643	10.4018	10.7741	10.0935	7.72321	7.8744	6.74578	12.3541	14.3104	12.7445
Cfap36	0.62862	7.56345	3.83631	6.33285	6.28525	3.23845	5.04724	4.05018	4.56253	4.47709	5.02313	4.40291	4.32378	6.56561	2.68956	3.61187
Cfap410	0.323538	2.9093	2.48447	1.55827	1.93162	1.32532	1.68504	1.69986	2.90016	2.49039	2.42527	1.9949	3.46131	2.04305	2.42988	1.85989
Cfap44	0.324641	0	0	0	0	0	0	0	0	0	1.14287	0	0	0	0	0
Cfap57	0.630531	0	1.11931	0	0	0	0	0	0	0	0	0	0	0	0	0
Cfap97	0.259574	1.64242	1.03001	2.01518	1.81939	1.70643	1.09783	1.23812	2.11765	0	1.58827	1.0565	1.63241	1.17373	0	0
Cgas	0.333067	0	0	0	0	0	0	0	0	0	1.01524	0	0	0	0	0
Chil1	0.197519	0	0	0	2.49209	6.84424	12.0821	10.2042	6.04069	4.42739	5.46324	3.09348	0	0	0	0
Chil3	0.100411	0	0	0	1.96323	6.79765	26.9285	38.3956	27.6318	19.1906	23.7883	14.1696	0	0	0	0
Ciao2a	0.00473651	86.8409	76.1056	89.9189	75.069	52.796	51.8585	42.3951	37.7028	38.7085	29.5097	35.8218	26.1305	38.0784	29.8668	24.3168
Ciao2b	0.2246	30.1668	32.1105	20.6942	19.065	23.2153	10.0945	16.4934	12.9136	15.8308	14.5279	18.2475	10.8989	14.8385	19.1839	18.123
Ciao3	0.470467	8.33171	10.0598	7.26253	6.68996	7.58774	6.62695	6.50724	7.20864	5.98536	5.78694	6.43058	5.3808	6.34305	10.6313	7.45588
Ciart	0.331136	0	0	0	0	0	0	0	0	0	0	0	0	1.41322	0	0
Cip2a	0.015255	11.7874	4.09539	12.275	10.7405	3.47884	6.43591	3.76709	3.11294	4.5436	2.65454	3.53112	1.81375	0	0	0
Cipc	0.166845	8.58491	8.02097	7.22861	5.85146	4.42088	3.57601	3.4646	4.27493	3.2406	3.25968	3.13483	2.87543	3.7336	4.78129	6.73192
Clca3a1	0.0179359	2.38087	1.20329	2.44995	3.1744	2.20628	4.8284	7.41831	8.1803	6.42524	7.03501	6.51608	4.87021	2.57017	0	1.67935
Clcn4	0.0225544	7.40679	4.77892	6.63914	5.5661	4.52539	6.05546	6.07436	6.40001	6.64055	6.17058	5.76473	7.42947	9.7524	6.64161	8.92218
Cldnd1	0.0544561	14.0377	11.8319	11.2335	10.1151	8.69268	7.6685	5.57836	8.00722	8.35545	8.15754	8.20986	7.13159	6.13199	4.61938	5.77956
Cltrn	0.635945	0	0	0	0	0	0	1.04486	0	0	0	0	0	0	0	0
Cnot9	0.00533493	22.7592	24.8027	20.9635	18.3626	15.4804	11.6537	10.0347	11.6436	11.745	10.2196	11.25	6.74047	6.96955	4.17225	3.98334
Cntrl	0.226586	8.68945	1.5148	5.14408	5.69183	1.84284	3.75174	6.66543	5.66735	4.16057	4.30213	5.07699	4.8973	2.70295	0	1.43077
Coa7	0.0307912	6.80231	4.48551	4.15985	3.84602	3.90359	3.51088	3.89376	5.84238	5.70107	5.91415	6.85434	6.06131	6.84382	5.61703	5.14981
Cop1	0.00365891	15.0792	10.3994	16.2446	13.811	10.783	9.89415	6.91379	6.58274	7.17788	6.33992	5.80541	5.15592	5.3327	3.32958	4.49814
Cops9	0.0119672	69.7335	71.0242	63.6438	54.2122	53.9053	57.8369	54.5447	54.045	45.4386	37.1687	43.3728	42.9266	51.8833	50.6353	41.6997
Coq8a	0.0029896	2.01901	3.16566	3.65578	7.23974	14.7795	11.1724	9.4807	8.28036	16.3906	28.7451	30.9349	51.4084	84.5696	120.039	37.0367
Coq8b	0.523202	8.35681	13.4225	8.89193	10.6676	16.8196	13.2201	12.3202	14.3373	11.5897	12.1757	12.7824	16.3047	9.23564	8.80401	5.94632
Cptp	0.634981	5.86838	8.00397	5.88296	4.83084	4.72253	3.96318	3.53163	4.82704	4.37059	4.45859	3.93184	3.59847	5.18324	7.14949	4.34893
Cracr2a	0.642411	0	0	0	0	1.18344	0	0	0	0	0	0	0	0	0	0
Cracr2b	0.42799	2.73506	2.50793	1.91472	2.47628	3.34533	4.56656	4.96668	4.88593	4.32385	3.49036	2.97328	4.43461	2.73178	2.24659	1.9281
Crybg1	0.000847507	0	0	0	0	0	0	1.26307	2.16541	2.66291	3.75157	3.12969	3.68267	3.83411	1.79218	1.80761
Cryzl2	0.0127244	5.83483	5.70643	5.57534	7.25496	7.05488	7.79613	10.1598	8.99815	13.1189	16.7062	16.2627	17.4432	12.2613	12.8754	7.90433
Csta2	0.212776	1.57476	1.7087	2.86322	6.98233	24.0137	77.5352	89.7072	66.2217	34.4562	34.3682	23.6484	0	0	0	0
Csta3	0.210821	0	0	1.12435	0	3.51738	7.49617	8.69698	2.93907	3.17376	4.86577	3.30032	0	0	0	0
Cstdc4	0.163599	25.6645	17.2588	46.6995	118.72	239.424	489.831	411.167	339.853	155.441	172.966	116.423	4.69147	0	0	1.32572
Cstdc5	0.081638	20.2047	17.7495	53.002	111.208	215.058	262.66	285.83	250.3	129.44	144.455	90.2512	4.43372	1.0802	0	0
Cstdc6	0.224398	0	0	1.27899	1.19612	3.08184	7.21963	6.87757	1.84077	1.44877	2.96986	1.23299	0	0	0	0
Cyb5a	0.00598444	99.1646	99.6546	37.5136	56.3502	128.205	167.816	195.677	33.2781	331.611	366.491	418.029	499.871	608.481	399.593	309.364
Cybc1	0.000356353	18.1194	13.6034	13.6834	14.7401	11.668	12.4983	11.4268	10.3482	9.38772	6.82143	6.88092	5.34852	3.7286	3.43754	3.75709
Cyp2c23	0.0225162	4.2747	6.39966	10.1686	18.2984	26.2118	25.7816	36.3613	55.0735	74.0975	104.172	103.663	73.7955	19.7485	164.648	67.5073
Cyren	0.436154	5.22351	5.98313	5.76059	4.84499	5.31091	5.13172	5.9348	5.23914	5.00862	6.21288	6.31141	6.94232	3.86927	4.44381	4.25192
Czib	0.671958	13.8189	9.01674	9.8455	9.21772	7.63076	9.78417	9.93146	8.87055	11.6631	9.63132	10.817	10.7773	10.3713	7.55791	7.82662
Dcaf1	0.00667883	12.4832	11.0382	12.8797	10.2111	7.37853	7.52911	3.87317	5.07655	6.20243	4.837	4.92206	3.47872	2.64646	2.0728	2.6046
Ddias	0.00582712	3.64237	1.31249	3.17534	2.6581	1.04144	1.83284	1.08092	0	1.06907	0	0	0	0	0	0
Dele1	0.0655257	20.9976	22.1443	19.7769	16.4875	17.7421	11.2401	9.78571	10.8454	10.8474	13.2641	12.716	12.7784	11.3946	12.0574	7.4724
Depp1	0.144213	2.47438	2.43244	4.08823	9.43178	44.4445	54.1702	92.4663	43.2171	50.3166	56.6638	37.0486	187.975	85.3504	79.0115	20.3052
Dglucy	0.0016595	0	0	0	0	0	0	0	0	1.14634	1.88752	1.48417	1.35888	4.74614	6.45799	5.7438
Diaph1	0.0159328	18.9759	21.5865	17.5274	15.5796	18.5094	14.1489	14.4775	16.0852	15.3737	15.7751	12.4819	13.1411	12.399	11.7872	9.77189
Diaph2	0.0631702	0	0	0	0	0	0	0	0	0	0	0	1.02943	1.00094	0	0
Diaph3	0.00254162	10.9438	6.47295	13.4327	14.3266	6.90701	7.36748	4.70223	3.0123	5.00364	2.56613	1.92911	0	0	0	0
Dipk1a	0.211972	6.25619	3.9188	6.12961	4.2774	2.73255	2.93324	3.93423	4.25456	2.76048	2.45643	1.92565	3.50831	4.43417	2.4983	2.85308
Dipk1b	0.370003	2.18105	1.96033	0	0	0	0	0	0	0	0	0	0	0	0	0
Dipk2a	0.0493324	7.6754	5.28908	7.50491	8.62517	5.50233	7.11096	5.57397	12.5433	13.4407	17.6246	15.4563	20.2545	5.76716	3.47497	6.2955
Dmac1	0.0129592	45.8911	51.864	39.2728	35.168	33.8258	37.2492	30.3556	25.9545	28.6763	23.8721	28.6058	22.1994	29.3144	31.1019	22.359
Dmac2	0.00102531	7.2998	7.15698	5.15544	4.6999	5.84424	6.57045	7.34863	7.92169	6.46843	6.36295	7.91601	9.17807	14.4144	12.4789	12.0466
Dmac2l	0.420105	4.58115	2.95464	4.31372	4.05261	2.16703	3.00807	2.8782	4.28323	2.54554	2.66847	3.82344	3.97257	3.13934	1.58767	1.52066
Dnaaf5	0.0374734	8.5029	8.7221	5.94561	4.63269	4.9058	2.54015	2.87188	3.00321	3.21829	2.41179	2.61687	1.73322	1.37919	2.84951	2.18552
Dop1a	0.166434	1.2293	0	1.24748	1.39502	0	1.04996	1.29376	1.68373	1.78344	1.7702	1.52521	1.71608	1.19331	0	1.33114
Dop1b	0.00496362	3.98865	4.94996	5.2954	6.73546	8.33963	6.95964	3.97726	2.4716	2.54083	3.02754	3.15956	1.59213	2.87918	3.06699	2.17698
Dus2	0.254492	8.88154	8.16347	6.61541	7.30729	5.27156	5.65906	3.5995	4.92565	6.38342	5.46871	8.33818	4.91422	5.94379	4.48024	3.22123
Ecpas	0.142531	11.2273	6.56171	10.5186	9.51678	6.45951	6.31986	5.70713	8.45322	6.32652	6.39952	3.28079	5.18464	6.68877	2.21457	5.67478
Edrf1	0.00817512	6.7966	5.50963	7.26951	7.35467	4.24473	4.06181	4.17068	3.21276	3.27814	2.62061	3.22364	3.09642	3.83242	2.24484	1.98483
Eef1akmt1	0.0917238	13.5726	15.1493	11.5158	8.59868	5.46158	5.67851	3.2904	4.01536	4.38905	3.70464	4.11702	3.46469	5.10586	6.52221	5.40847
Eef1akmt2	0.0214139	8.21267	5.57942	4.32356	6.14329	3.52449	5.07349	3.90705	2.09013	2.9806	3.61115	3.27194	4.04582	2.80335	1.07787	1.10671
Eef1aknmt	0.0176041	8.35912	9.52994	5.793	4.93134	4.69279	4.07441	3.14109	4.08838	3.03967	2.56677	2.05903	2.07407	1.87655	2.189	1.45817
Eef2kmt	0.0947425	8.30905	9.1418	8.08027	6.35402	5.92185	6.24293	5.67653	5.85881	5.94036	4.44127	5.83553	6.3379	5.31159	5.97499	5.54513
Efl1	0.00935744	5.63029	4.43506	4.89161	3.69578	3.88127	3.12247	3.08551	2.75589	2.90353	2.78947	2.2065	3.03567	1.90337	2.00595	2.14242
Eipr1	0.0231877	13.2643	18.38	12.7356	10.788	11.8224	7.72878	6.06792	6.97748	6.09593	4.2501	4.63366	2.86993	6.02291	8.33035	5.58068
Eloa	0.000842823	19.0591	16.7864	19.0496	17.9515	16.0178	12.8547	10.415	10.1805	11.6966	9.01986	8.62228	5.71741	6.29376	5.49945	5.45703
Elob	0.0280158	243.256	287.666	248.014	229.48	244.006	192.208	171.874	162.591	200.175	146.022	179.271	149.194	173.391	205.655	163.25
Eloc	0.0255763	75.857	39.1274	66.9556	59.7223	35.8131	46.5075	32.0909	33.3785	33.1935	28.4946	30.2441	25.7943	32.0079	14.7218	26.1451
Elp1	0.0145111	10.7721	8.30364	7.76994	6.2263	4.54896	4.75268	3.49448	4.49272	4.23552	3.5715	3.1316	2.35333	2.45444	1.62975	1.5267
Emsy	0.00717586	4.41075	2.23829	4.08477	3.95451	1.89769	3.38223	2.82827	2.14999	1.84583	1.86783	1.7489	1.75354	1.31499	0	1.16824
Eno1b	0.22235	25.3583	23.4887	16.0835	11.6437	15.8541	12.1851	13.0386	10.0596	12.9486	11.0674	14.3744	11.0679	12.4337	17.1752	7.82566
Entpd4b	0.00944073	2.4486	2.97189	2.05927	2.46036	2.4996	1.31094	2.60235	3.08121	3.44132	3.79438	3.57245	4.57201	3.14356	3.90095	2.99656
Entr1	0.0107487	21.6789	20.4264	21.2381	19.4918	16.3707	17.5668	15.0543	15.3114	15.4208	11.7185	14.4426	10.7539	15.8832	13.1068	14.0655
Epb41	0.000961902	54.4812	72.8386	78.9068	70.0185	56.0625	52.3087	37.0829	30.1426	42.3046	20.2089	8.9556	9.2739	8.8317	7.3302	13.8739
Epb41l1	0.00915042	1.88796	2.49387	2.07623	2.8961	2.04551	1.52504	0	1.36866	1.32668	1.90344	1.1612	0	0	0	0
Epb41l2	0.411245	3.386	3.07479	2.58394	1.4215	1.75956	3.20235	3.19433	2.17269	2.89125	2.21252	5.59322	4.75321	1.931	0	0
Epb41l3	0.00654341	3.29744	1.50507	2.30723	2.5181	1.52694	1.38341	1.42215	2.18621	1.77519	2.26985	1.77774	1.20928	0	0	0
Epb41l4b	0.000840943	2.41433	3.39341	3.00448	3.09405	4.83679	6.52639	10.9101	8.53667	10.048	14.267	13.2376	16.9451	15.3167	25.5949	21.0766
Epb41l5	0.0391656	3.16509	3.46324	4.08655	5.42809	4.50865	6.54783	5.732	7.78848	6.74918	7.97392	8.78326	9.39854	7.69287	4.63212	4.48018
Epb42	0.00172249	58.067	47.1748	79.1384	93.7262	54.6188	45.5932	24.4506	13.6617	22.1321	7.60976	7.9968	0	0	0	0
Epop	0.79859	5.41224	4.31949	2.39929	1.29047	1.856	1.62798	1.86723	7.10732	2.49928	2.23805	2.57373	2.62613	7.11121	1.4793	1.34994
Erbin	0.294588	7.22945	2.50261	6.20423	6.82934	3.10966	5.69626	5.30546	9.1952	5.88202	7.71157	6.2447	7.85926	5.72832	2.01914	5.05217
Erfe	0.00602999	4.61145	4.04023	2.50038	2.44024	3.58733	2.72371	1.53768	0	3.20415	0	0	0	0	0	0
Erg28	0.186741	33.6069	31.9086	30.2548	32.374	31.5899	35.4054	39.5949	27.1483	32.1913	34.5328	41.0773	48.4447	81.4944	31.7142	33.8709
Ess2	0.0118523	7.93111	9.4124	6.15104	5.98306	5.83864	4.12721	4.18508	4.62398	3.82171	3.68719	3.10159	3.21895	2.73138	2.90701	2.03236
Etfbkmt	0.0225083	3.36137	2.4716	4.09797	4.20867	3.74177	4.75566	3.67468	3.14561	3.13522	2.8716	1.39686	6.41567	6.92774	18.9932	30.0314
Etfrf1	0.0169795	4.39489	2.83397	4.46557	5.79416	4.25259	8.14356	10.8692	10.3561	9.11094	11.1309	10.2061	14.969	16.2659	8.36053	9.76402
Evi2	0.000558207	3.05591	2.29367	3.06442	3.81461	2.98183	4.47587	4.37726	4.18197	3.36428	3.72388	2.91173	1.33065	0	0	0
Faap100	0.0576145	6.29267	7.3756	4.18761	4.20084	4.87328	3.51935	3.84752	3.54821	3.67493	3.2681	2.86748	3.30277	4.12775	2.52744	1.84355
Faap20	0.285641	15.6829	16.887	14.4093	9.49132	12.0522	10.7961	12.4334	12.1065	11.973	10.3414	10.2089	12.7005	9.45791	12.2749	9.5589
Faap24	0.00275777	15.0511	18.3714	14.4481	12.517	11.2404	6.8588	6.22024	5.17948	6.30302	2.23306	2.89468	1.37905	1.79788	1.74644	1.8146
Fam204a	0.0210408	7.65742	4.9604	6.45125	6.5265	4.52674	3.86241	3.06365	3.71461	3.36837	3.3144	3.85636	3.12447	2.90187	0	2.40918
Fam234a	0.00283507	7.12294	10.3379	7.42283	9.08916	12.6425	10.414	12.1469	16.659	15.5924	20.6614	17.8468	17.7255	15.5963	25.2933	16.1338
Fam234b	0.0017394	20.5474	21.2316	21.4873	20.4298	20.106	15.2322	10.8517	6.73383	10.4918	6.26834	7.21868	7.29876	12.8054	5.92849	5.4538
Fam241a	0.00019898	45.5073	45.9065	58.159	54.2473	50.1666	42.19	24.3196	17.0002	16.8762	7.29587	6.61017	3.41448	2.39064	1.81811	2.50696
Fam8a1	0.0380564	8.82988	6.7895	8.6501	8.93735	6.71111	8.64864	7.12663	7.94922	9.03964	10.82	10.3677	12.9947	11.0774	7.93289	11.7477
Fam91a1	0.685251	9.8049	6.00073	7.35292	8.14565	6.7584	6.84233	6.94112	8.61605	8.23463	9.09346	6.94969	11.1063	9.22546	5.63072	6.50101
Fbh1	0.0357736	10.5511	10.2019	7.92495	7.34635	7.05978	6.21949	6.51514	7.5543	8.30578	7.96098	6.0029	6.10956	5.56647	4.41604	4.13149
Fcmr	0.155099	0	0	0	0	0	0	0	0	2.02639	1.1909	0	1.01676	0	0	0
Fcsk	0.841663	4.3559	3.65683	2.76323	2.73717	3.42323	2.54715	2.13031	2.53067	2.84789	2.9359	3.10708	2.32897	2.80081	4.18166	3.16144
Fdx2	0.184533	29.773	34.603	24.6467	21.0264	20.3608	17.6817	15.8375	19.8425	16.7894	11.7813	16.7788	13.8431	17.2993	25.02	16.9427
Flvcr1	0.00217397	3.73779	3.10552	3.06781	2.61038	1.95808	2.24873	1.67176	2.23555	1.67882	1.58885	1.6502	1.33381	0	0	0
Flvcr2	0.0845634	1.32788	2.45428	2.61725	3.86512	4.48791	3.19166	3.09871	4.18342	6.3197	9.59559	7.16289	8.69336	2.09569	0	0
Fmc1	0.0168789	48.3903	55.2696	51.5815	43.2398	51.3478	41.3671	45.4723	40.6484	48.9275	40.3161	52.7878	55.5419	71.171	74.4244	53.0258
Fndc10	0.266395	1.04958	1.17789	0	0	0	0	0	1.13228	0	1.09191	1.69354	0	1.2028	0	0
Frg2f1	0.164038	0	0	0	0	0	1.35004	1.26367	1.31377	1.24771	0	1.46243	2.28339	2.18881	0	1.29573
Ftl1-ps1	0.311808	111.875	164.263	107.411	92.9356	116.185	97.1352	83.0802	82.6316	86.701	79.5083	94.8253	67.0621	143.719	178.245	104.633
Fyb2	0.0170333	0	0	0	0	0	0	0	0	1.04256	1.54477	1.46364	0	1.72125	1.47471	2.2079
Garem1	0.236072	6.40628	5.75365	7.3933	6.33851	4.41173	3.22908	3.51038	3.78619	4.43767	3.24927	2.87905	4.85179	3.8695	3.29666	6.49425
Gask1a	0.331515	0	0	0	0	0	0	0	0	0	0	0	0	0	1.89954	0
Gask1b	0.631677	1.10629	0	0	0	0	0	0	0	0	0	0	0	0	0	0
Gatb	0.0356347	4.79528	5.43422	5.20402	5.21641	4.20712	3.12713	3.5145	3.32838	6.53965	6.52347	7.49025	7.39354	8.03003	6.4184	6.02514
Gatd1	0.172331	10.2526	11.9372	9.85793	8.80664	9.5052	7.27146	7.10539	9.96205	10.4828	9.09526	7.39749	10.6524	5.19875	6.548	4.3132
Gatd3a	0.00275999	26.7954	30.3382	27.295	24.4426	29.1235	28.1143	31.1195	24.704	31.4044	35.1547	40.8011	42.3784	59.5038	60.1276	40.3117
Gbp2b	0.333478	0	0	0	0	0	0	0	0	0	1.0856	0	0	0	0	0
Gcn1	0.0104583	20.2103	24.124	15.2828	13.284	14.4112	10.7945	9.14263	9.00863	10.6133	8.67306	7.84242	5.69026	6.62779	4.53183	5.28356
Gimd1	0.388163	4.6893	2.1289	2.93758	2.32776	0	2.0109	1.99999	1.68872	3.40601	4.3617	3.56813	1.42227	2.98598	1.0278	2.54279
Gk	0.0448038	1.95724	1.3414	2.10799	4.03127	4.23441	10.4841	9.75894	21.8074	17.5184	26.4	23.2792	44.6933	19.6366	5.14461	7.22546
Glmp	0.50986	9.65914	11.9587	16.1367	8.86826	11.5271	14.7976	17.1054	10.5391	21.7168	16.6706	9.52184	12.4453	20.4039	18.1478	13.4953
Gm16867	0.00495602	15.191	19.5379	17.8658	8.49585	1.40223	9.11982	14.4074	1.03983	3.40691	1.07515	0	0	0	0	0
Dpcd	0.169271	11.3689	13.1439	10.8985	7.50561	6.49327	5.85266	6.08723	6.48653	6.06619	5.81676	6.64202	5.5515	6.12552	6.80931	6.81062
Gm28036	0.00450224	20.648	17.9074	17.9772	15.6747	11.9369	11.4741	9.876	9.0554	10.6506	10.3545	9.41802	7.78688	6.00268	4.82318	5.01932
Gm28038	0.0133716	10.0789	9.70026	8.0683	9.46224	9.01214	10.2666	12.7019	8.85388	10.2718	13.7204	17.1911	15.8056	16.8025	17.3187	13.3548
Gm28044	0.629213	0	0	1.17388	0	0	0	0	0	0	0	0	0	0	0	0
Gm28048	0.00358524	12.8702	15.0108	12.4755	12.2381	14.5658	12.5485	14.011	13.224	14.237	13.3591	13.1475	11.9891	9.47986	8.67751	6.78253
Gm28051	0.00237054	15.5037	12.9546	15.3668	10.3508	10.0178	9.36359	7.70666	5.30815	6.56919	6.69809	7.15752	5.86911	3.37554	2.94429	2.8258
Gm28053	0.00741557	3.38535	2.1394	1.55064	1.71109	2.27277	2.48823	1.71192	1.65024	2.25534	2.51329	2.0019	1.09718	1.20407	0	0
Gm29394	0.850861	13.9544	16.2679	10.9442	8.90183	6.52453	6.97478	5.82034	13.3749	10.3694	9.35264	10.9666	9.28738	10.462	10.4634	10.5233
Gm38393	0.551016	7.90981	6.71956	4.96152	3.04682	2.15282	1.45915	1.97074	2.702	3.31226	4.51254	5.27046	4.60822	5.05907	7.07298	4.82757
Zbed6	0.144456	13.0393	8.07694	12.4694	13.7754	7.66477	13.9197	11.9509	10.7821	10.894	10.2703	10.2235	12.4409	7.68994	3.81669	7.14389
Gm42688	0.0334643	11.7735	13.4476	11.395	9.91434	9.46567	8.59564	7.64841	7.09676	7.86598	6.83592	8.33854	6.36607	8.25976	8.0589	8.15011
Gm43302	0.00355893	0	0	0	0	0	1.3527	3.45538	4.96656	4.87864	7.4089	5.86378	6.07951	1.12753	1.96026	3.72854
Gm44503	0.00299768	3.60081	2.51412	3.24998	3.35537	2.5253	2.94417	4.8124	4.28655	3.07796	4.44122	2.97501	6.75798	5.47346	5.2854	8.07335
Gm45713	0.141975	3.86455	5.62952	5.02157	3.35927	2.36122	2.25746	2.43449	1.70033	2.85661	1.96322	1.86382	2.3258	2.48558	2.80993	3.23189
Gm45753	0.0113324	1.24557	1.74517	5.49718	11.0238	13.2776	22.0119	31.3776	28.2476	25.9614	37.8077	29.7341	37.8628	34.3303	33.522	24.4747
Gm45837	0.0442191	6.47331	5.99087	4.31313	6.27683	10.8016	13.048	13.1794	14.3266	10.3222	13.523	10.2125	8.07111	6.07994	3.97468	2.23437
Gm49322	0.0101063	21.3711	27.428	17.3368	16.7675	17.1324	11.8784	10.9687	10.5742	9.17446	8.26579	8.07026	6.99346	7.02743	9.47745	8.33915
Gm49339	0.0814354	0	0	0	1.44768	0	1.86412	2.66275	3.77157	2.43583	2.63409	2.37042	2.23798	3.83093	0	2.23644
Gm49340	0.00775956	0	0	0	0	0	0	0	1.27367	1.07064	1.25214	1.26725	2.67634	1.57913	0	1.28833
Gm49342	0.156398	40.5903	36.7614	51.7697	49.4484	40.528	49.588	61.3606	27.4836	39.8245	34.0386	39.3543	34.1385	50.9759	38.9771	57.207
Gm49405	0.359742	9.40769	6.1969	9.52582	3.25789	3.54045	3.92195	9.99465	14.4414	5.22192	4.09592	4.96446	3.77331	17.1182	9.42838	12.9831
Gon7	0.00178237	11.274	11.5187	12.8635	10.7975	9.68681	9.51603	7.02039	5.96345	7.00676	6.97202	6.4304	7.195	3.91869	3.06696	3.18641
Gpat3	0.0321757	0	0	1.15406	1.97404	2.19722	3.2852	3.16407	5.89468	6.58503	4.92889	6.4184	7.3937	1.66819	0	0
Gpat4	0.101593	21.831	26.5211	19.7061	18.524	18.9603	15.1199	13.8243	29.3897	18.6707	22.1223	16.9916	27.4251	23.6767	31.3269	23.6087
Grk2	0.000965742	27.1419	33.2692	23.5466	25.3615	31.6676	24.9056	28.0006	33.5629	25.9704	21.0056	18.4026	10.9229	10.5881	9.57196	9.41414
Grk3	0.472139	1.49981	0	1.63262	2.42897	2.23053	3.53788	3.56795	2.22105	3.04746	3.17279	3.44395	4.39562	2.18647	0	0
Gsdme	0.0393745	0	0	0	0	1.31923	1.43571	1.37923	1.92068	1.60598	2.36956	2.7193	1.6553	1.8587	0	0
Gstp3	0.198143	16.4121	24.0772	38.8131	54.2064	109.843	106.232	126.739	37.3079	102.097	95.8469	129.196	76.0652	15.6623	21.2062	12.2029
Gucy1a1	0.0263136	4.08532	2.37378	2.86829	2.63598	1.88826	1.73804	2.69069	4.23189	4.19511	6.24043	5.15704	4.31584	2.91624	0	0
Gucy1b1	0.0383973	4.53913	2.38742	3.27761	2.519	1.94934	2.54372	2.46746	3.15308	3.38004	4.58636	3.50597	3.20282	1.86035	0	0
Hacd1	0.00015276	25.2321	28.13	24.153	22.0923	24.5672	21.797	19.4227	18.5629	18.0701	15.0324	14.7501	8.1995	11.3381	9.09484	5.81721
Hacd2	0.00535652	7.89131	7.9753	9.46706	10.123	9.77286	10.888	11.745	11.3921	18.6237	19.2855	18.5331	21.5392	20.2691	12.9679	14.9131
Hacd3	0.022333	26.6224	21.2381	25.2054	27.4649	24.4988	33.729	42.6854	53.2793	47.0331	59.4486	56.9584	75.067	51.9572	30.8022	33.1863
Hacd4	1.85769e-05	1.56374	1.48589	1.88889	1.67262	1.95162	1.66145	1.61794	1.7701	1.16903	1.66013	1.21979	0	0	0	0
Haspin	0.00161453	7.37531	7.07175	6.87834	5.67336	4.80659	3.78761	1.93737	2.47166	2.55769	1.6821	2.07979	0	0	0	0
Hdgfl2	0.0275806	43.026	42.7878	32.8048	28.6933	26.8459	19.7811	18.2953	20.0873	19.9016	16.3379	18.7569	13.2807	19.0178	16.374	14.1485
Hdgfl3	0.633182	1.10361	0	0	0	0	0	0	0	0	0	0	0	0	0	0
Hdhd5	0.0206988	7.63053	8.35453	6.61685	5.99127	6.35986	5.13538	5.35068	4.75218	6.99548	6.99192	7.87041	7.325	11.2163	10.7153	9.10822
Hectd4	0.000292882	13.4505	13.4914	18.908	16.5834	15.1842	11.2934	8.67395	5.66091	6.2134	2.86979	2.23471	1.0804	1.21273	1.06412	1.13427
Hgh1	0.0209816	17.3318	19.774	11.6577	9.73523	8.71138	6.90397	6.64896	8.81	4.62595	3.50354	3.70182	2.03305	4.07645	3.65716	2.72765
Hikeshi	0.056316	12.8626	15.9843	11.8222	9.81162	6.99423	6.63925	5.65708	3.79094	5.14363	5.88589	6.16613	5.56975	6.11025	6.92057	5.72658
Hist2h2aa1	0.322354	2.21752	3.18007	0	0	0	0	1.03574	0	3.52638	0	0	3.59106	0	40.9656	0
Hist2h2aa2	0.0523287	5.30129	16.7233	7.52595	19.7904	28.4785	28.6101	23.9493	42.6773	40.5926	29.9673	25.8491	16.5187	48.2057	145.831	88.292
Hjv	0.0611566	1.31153	2.75717	4.2006	11.64	17.8812	27.9443	43.4342	24.139	23.7502	26.6818	28.5645	26.6856	55.416	42.6643	32.6421
Hmga1b	0.0258064	66.1796	87.2319	45.562	32.8125	30.91	16.0669	15.0073	16.1054	9.90959	8.00126	7.67375	4.63358	4.459	2.76243	1.99409
Hpf1	0.00459714	51.4008	26.018	45.741	42.7168	21.1092	25.5199	18.1471	11.7278	17.5003	10.5167	11.999	5.23728	7.12791	2.53736	2.96553
Ice1	0.0160553	5.48078	3.82611	4.59485	3.97647	2.67664	2.65659	2.71773	3.60982	2.72547	2.42387	2.58436	2.13069	1.94607	0	1.27348
Ice2	0.214692	2.89399	1.47753	2.93636	2.16515	1.2882	1.18309	1.11107	2.10328	1.45987	1.72424	1.78821	1.40883	1.63221	0	1.01275
Ifi206	0.969612	0	0	0	0	0	0	1.7008	0	1.01361	0	0	1.36161	0	0	0
Ifi207	0.15973	0	0	0	1.32598	0	1.25066	2.47939	2.31806	2.14971	1.93083	1.39356	2.2088	1.89907	0	1.57375
Ifi209	0.050848	0	0	0	0	0	0	2.65182	2.35918	2.01433	1.86461	1.12902	1.24954	0	0	0
Ifi211	0.36216	0	0	0	1.1535	0	1.2083	5.83651	3.62052	2.71356	2.8571	1.96538	2.8254	1.37037	0	1.2336
Ifit3b	0.119051	0	0	0	0	0	0	3.76611	2.42831	2.01317	2.08329	1.57829	2.85238	1.25155	1.34005	1.96064
Ift22	0.480236	4.42226	6.13884	3.1693	3.79345	3.5206	3.47354	3.78266	4.18823	5.6287	4.96621	4.2286	4.23631	4.01823	5.03272	3.42861
Ilrun	0.071484	40.8402	54.3017	43.8963	41.3939	45.7436	38.8332	35.1529	39.8691	38.062	33.0434	31.145	39.4814	46.6689	62.3339	48.3884
Inafm1	0.0288794	12.257	13.3859	11.1968	11.8296	12.5216	10.4958	9.63113	14.8992	8.61144	7.67087	6.74026	9.93028	6.83336	3.39123	3.45795
Inka1	0.00165546	31.1642	32.168	28.8579	23.468	24.6591	14.0356	11.2574	14.5683	9.36945	4.2784	4.80271	1.68025	1.07994	0	0
Ints11	0.0105241	21.1554	25.9621	19.5084	16.1907	17.7861	12.3916	10.3579	8.22905	10.8537	10.0933	10.2299	8.33402	8.59073	9.5529	7.7118
Ints13	0.00473638	23.2064	15.1385	16.5592	15.158	10.7185	10.4282	9.41387	6.76983	9.14593	5.34466	7.39546	4.27554	4.99606	2.28821	4.17972
Ints14	0.00698251	18.487	17.57	14.8166	12.1419	10.9796	7.14693	6.52751	5.70505	6.17534	6.01721	5.22046	3.18858	3.39916	4.26256	2.86227
Ints6l	0.00152552	20.7202	11.3656	24.8366	21.6668	13.8368	18.2026	8.78042	8.28188	6.06683	5.083	4.9089	2.99343	1.83025	0	0
Itprid2	0.00290796	4.30977	2.96577	3.57525	4.2267	3.84777	4.52396	4.30706	5.83639	6.27763	7.49246	5.85496	6.3	5.35727	4.13309	5.02408
Jade1	0.459451	3.20573	3.41988	4.82756	4.43635	3.01639	3.12949	1.66967	3.21919	3.49581	4.02578	3.38498	4.20447	3.20821	1.24103	1.89583
Jade2	0.188017	0	0	0	0	0	0	0	0	1.4785	1.39965	0	0	0	0	1.33584
Jade3	0.00436891	5.90681	3.88536	4.80919	4.71085	2.1789	2.70717	1.32086	1.63945	1.46503	1.20809	0	0	0	0	0
Jcad	0.00229652	4.44223	4.79609	4.52516	4.06156	4.31051	4.24179	4.19935	4.22854	4.77595	5.57227	3.56768	3.31441	1.92903	0	0
Jpt1	0.00166175	112.369	146.442	111.711	99.821	85.8307	68.39	51.3549	44.39	43.3413	28.7672	33.388	22.3795	13.8281	14.3879	10.5386
Jpt2	0.011001	39.2869	40.8358	32.2744	29.865	25.4512	19.8229	13.7359	12.0258	20.014	17.3224	16.4518	8.27042	11.8431	10.2051	11.0903
Kat14	0.0267393	12.4947	13.5617	12.1214	8.88107	7.87569	7.17581	5.30348	7.35321	6.20966	7.79748	5.73933	4.0772	4.56922	5.91253	3.69474
Kbtbd6	0.00343248	1.90067	1.53706	2.27105	2.06081	1.76849	1.03541	0	0	0	0	0	0	0	0	0
Kctd12	0.00336137	4.97498	3.43364	4.11689	5.01036	4.96908	4.18346	2.97264	5.22607	5.94121	8.32747	3.28693	2.32729	1.2732	0	0
Kdf1	0.018028	0	0	0	0	1.82969	1.80724	2.68165	1.84184	2.34308	2.86846	2.3133	2.52757	2.55156	3.63665	2.99565
Kdm7a	0.00283529	5.94755	3.48367	8.01099	9.43189	4.76835	6.67761	3.85257	2.91133	3.10246	1.79246	1.61125	1.48945	1.17128	0	0
Khdc4	0.169758	14.2759	9.98763	13.3786	13.193	9.12605	9.87938	9.95505	12.9551	10.5569	9.21616	11.1036	12.0673	8.32597	3.80225	8.34745
Kif1bp	0.00812533	10.7933	9.81508	10.6511	8.58425	6.91324	6.21717	5.24823	4.91779	4.68019	4.10228	4.20404	4.2764	3.33504	5.26975	4.95177
Kiz	0.692129	4.8621	2.75344	5.66964	5.12522	3.79593	3.44013	4.3461	4.61769	3.04594	3.64057	3.26218	6.23819	3.65959	2.47039	3.51347
Kmt5a	0.00109818	50.764	71.578	54.5219	77.7274	62.3062	48.9792	34.0875	32.5485	30.7378	26.9913	26.0577	15.7184	18.229	11.9959	14.2896
Kmt5b	0.66086	3.39911	2.46017	2.46772	4.953	2.40795	4.43796	2.23301	2.39227	2.49717	4.69472	4.95127	6.22782	2.11009	2.9957	4.7795
Kmt5c	0.00072791	73.8005	80.9753	74.2831	72.4642	60.1031	44.8155	35.2519	34.2522	24.2714	16.8488	14.6944	9.17089	12.1057	9.37672	4.95618
Knl1	0.0118274	5.43504	1.78482	6.3788	6.84324	2.03452	3.40207	1.90243	1.51798	1.80604	1.05103	1.06599	0	0	0	0
Kyat1	0.037338	7.37284	8.15647	7.59734	8.12396	8.11078	11.5575	17.3265	18.2218	21.4324	21.363	22.0236	10.8217	23.9564	70.9745	46.0207
Kyat3	7.11469e-05	4.06153	4.38144	3.87569	5.33105	4.8793	7.65535	25.4285	100.525	83.3339	104.833	118.087	62.6129	37.2648	19.3099	22.9894
Large1	0.309193	1.89936	1.21788	0	0	1.00572	1.1272	1.50981	1.19111	1.08832	1.36201	0	0	1.07624	0	0
Large2	0.0911587	0	2.11968	1.55368	2.18367	3.29759	3.95887	2.32712	3.94383	1.4571	2.20413	1.52629	1.71997	0	0	0
Ldah	0.0886463	10.5029	9.42519	8.36947	7.59542	5.6798	5.31267	5.53454	5.39401	5.18206	5.79655	5.22998	6.80457	7.68216	9.11628	10.9217
Lins1	0.0830829	1.9197	1.87589	1.09827	1.45427	0	0	1.59711	1.78741	1.1963	1.16581	1.81179	0	0	0	1.01812
Lipo3	0.655029	1.16894	0	0	1.22273	0	0	0	0	0	1.30421	1.63623	1.35853	0	0	0
Lmntd2	0.352942	1.32634	0	1.15882	1.21769	1.25561	1.54512	1.01244	0	1.1042	0	1.18217	1.11565	0	0	1.19145
Lnpk	0.00743154	7.86376	2.55017	6.32153	6.12466	2.75946	3.00055	2.71555	2.31084	2.31937	1.12325	1.15783	0	0	0	0
Lratd1	0.000960404	0	0	0	0	0	0	0	1.83147	1.75649	2.0239	2.10336	1.77522	1.19385	0	0
Lratd2	0.00865367	2.60374	2.13524	1.7022	2.32272	1.65429	1.92835	3.65346	4.4064	5.22684	5.89941	5.39907	4.37545	2.61994	0	0
Lrrc75a	0.013129	2.46849	2.23358	1.82372	1.31978	1.61162	2.0105	1.4772	1.54489	1.86946	1.88821	1.63952	0	0	0	1.86436
Lsm8	0.00279862	43.6054	36.9597	37.2046	34.1904	22.8161	25.6885	18.4599	21.2067	18.4985	13.592	13.9625	12.8198	9.39209	4.71754	5.63459
LTO1	0.333869	14.8773	13.5549	9.25818	10.1805	8.4333	8.21697	7.17493	7.03381	8.77889	11.0249	8.67341	9.33693	10.3605	5.32613	5.13005
Ly6g2	0.000132279	1.12962	0	1.97701	3.61135	3.73585	6.19535	15.1701	13.2985	25.7745	42.3002	44.7713	60.8829	75.7954	63.3199	52.9851
Mab21l4	0.634605	0	0	0	0	0	0	1.26251	0	0	0	0	0	0	0	0
Maco1	0.00982147	14.224	13.7929	13.3673	11.7868	10.924	7.85619	9.17606	9.57296	7.45102	8.12212	7.17306	7.80934	7.09905	6.65952	6.56459
Maip1	0.1149	6.89489	6.08768	5.7638	5.774	5.05931	4.56455	3.71196	4.97594	5.3224	4.5001	5.36419	4.46776	4.25031	4.02483	3.96829
Map11	0.000198021	13.2238	11.1655	12.3044	10.8694	9.61249	9.15583	10.1415	8.19207	6.01465	5.64764	5.69819	4.10862	3.96775	3.61728	5.0609
Map3k20	0.00617334	2.17054	3.21983	4.32896	4.87181	2.60666	3.49752	2.06055	2.19629	2.75521	1.75192	0	1.16748	0	0	0
Map3k21	0.137544	0	0	0	0	0	0	0	1.15383	0	1.15402	0	1.57144	1.59851	0	0
Mcemp1	0.158628	0	0	1.41507	3.94696	7.00031	11.1936	8.82786	8.2252	3.43058	4.26416	2.12628	0	0	0	0
Mcrip1	0.140239	31.8948	39.6921	24.9696	24.6211	29.9328	25.8888	27.1967	41.3416	26.6184	24.6133	25.8899	28.2917	23.3144	18.4971	9.78973
Mcrip2	0.056073	33.1756	49.7596	27.5886	23.5545	23.7526	24.5295	24.816	84.0155	39.4018	43.6651	52.6605	55.0589	59.7407	50.7144	26.4136
Mcub	0.00114515	3.25183	4.98188	6.57087	9.65342	7.83708	6.02405	3.6903	1.7046	1.09974	0	0	0	0	0	0
Meak7	0.703666	2.88276	4.52233	2.8956	2.55461	3.32881	2.27798	3.04339	3.8129	2.77031	3.5072	3.40433	3.0971	2.81078	3.70249	2.52583
Mesd	0.0331788	18.626	15.7592	33.003	14.0216	8.8079	31.4826	21.6137	8.4306	9.54273	14.4061	9.37858	12.1662	6.69559	5.30032	4.56818
Mettl26	0.00488424	36.7386	45.0157	37.768	40.0302	38.9636	36.5521	42.9031	51.7146	72.5531	76.512	77.6164	100.452	82.5696	197.003	108.222
Mettl27	0.101341	4.6688	6.48546	5.49608	5.8041	7.82019	9.63836	5.85556	5.60822	4.8051	2.78328	2.86308	7.32909	8.75519	4.00035	6.84796
Mfsd13a	0.000888891	11.5739	12.1012	10.3225	12.1788	16.1767	10.5531	6.24717	3.9645	3.22109	3.43076	3.24366	1.52833	3.67844	4.93756	3.08696
Mfsd14a	0.0135223	16.1935	12.7553	15.3701	14.2927	11.4279	12.9868	10.7841	11.4619	10.4063	11.8586	8.4615	10.7741	10.0084	6.13216	7.07568
Mfsd14b	0.0108315	15.796	13.5081	16.1093	15.9887	12.0374	10.3026	7.90375	7.63723	10.2219	11.5563	8.77415	9.06024	6.27012	4.46579	4.60138
Mfsd4a	0.418335	1.06197	0	1.2578	0	1.01175	0	0	0	0	1.16403	0	0	0	0	0
Mfsd4b1	0.00352396	0	0	0	0	0	0	1.27554	1.85623	2.93301	3.58937	2.07926	2.45807	6.50446	11.9862	6.62498
Mfsd4b4	0.138834	1.81276	1.24358	1.28227	1.56756	1.32163	1.13937	1.0469	1.79732	1.20774	1.23809	1.54589	1.62869	1.23883	0	0
Ctage5	0.383423	22.5218	8.27737	14.8652	29.4972	11.0461	28.8836	24.9875	14.3243	16.7834	31.6631	20.6446	32.0137	27.1654	24.4844	24.3895
Micos10	0.570322	24.0372	20.7442	19.0511	24.3926	11.8286	20.0364	41.7585	24.2096	37.9156	21.3106	30.0264	19.9289	22.7435	28.5294	20.6367
Micos13	0.151839	74.532	83.4146	73.1183	65.3624	70.3023	57.1128	60.9234	85.6631	75.8675	62.8633	76.5556	79.2749	117.216	93.361	65.7767
Miga1	0.00191613	2.56737	1.24935	2.31699	2.18074	1.63748	1.76571	1.81447	1.85616	0	0	0	0	0	0	0
Miga2	0.0331213	6.94728	7.99093	5.41153	4.66794	3.58042	3.71874	3.79569	5.90318	8.3258	8.2092	11.4289	6.66575	9.45734	12.3821	8.02322
Mindy1	0.144607	8.12828	11.8019	11.1026	9.49404	15.6525	9.82845	23.3631	20.0758	15.2068	22.7597	12.0056	11.0142	22.1817	30.6672	21.9819
Mindy2	0.000916102	5.78644	4.86273	7.763	9.04946	5.61004	6.30647	4.66254	3.25111	3.10082	1.97677	1.60301	1.57121	2.22072	0	0
Mindy3	0.200407	10.5638	4.50441	8.00214	8.59955	5.38726	4.3464	3.75011	2.99421	2.6123	5.03805	4.02793	3.1516	6.67491	5.93659	6.98615
Mkrn2os	0.0149757	2.15949	4.69366	3.95136	5.27422	7.48901	8.73468	12.1669	6.63405	7.53656	9.97797	11.837	9.97284	14.6932	16.1557	14.7301
Mmut	0.0103993	10.1047	5.12671	10.4609	11.3819	6.82249	10.45	12.8512	14.9308	19.0464	24.5143	22.1291	23.0264	32.3776	11.9905	19.2898
Mosmo	0.0216689	3.3956	2.76645	3.61484	3.0973	2.54089	2.48044	2.25501	2.32663	2.22132	2.19066	2.30373	2.23895	2.2246	1.42735	2.02004
Mpig6b	0.00732006	6.55349	8.25216	4.23598	4.29878	6.73329	2.7333	3.19199	5.58219	3.10178	1.42987	1.02147	0	0	0	0
Mrm2	0.586126	8.01584	11.4786	7.94743	5.91438	6.00898	3.67141	3.94825	5.04425	6.1339	6.3295	6.7617	4.81135	5.02636	7.31817	3.69633
Mrm3	0.0487371	10.4818	13.3165	10.3341	7.93952	6.07751	5.41034	4.77244	5.79312	5.25669	4.43926	4.95683	2.94617	3.72052	5.96016	3.61737
Mrnip	0.230677	4.92903	3.56779	3.56273	3.57603	3.75751	2.76962	1.80358	2.16689	2.51307	2.94084	2.71239	3.85562	2.96462	3.55804	3.3637
Mrpl57	0.0274219	28.1395	33.868	24.7109	20.7087	22.8987	18.5928	16.2828	18.1575	14.4184	10.9524	14.3018	9.55893	16.548	18.9221	13.3354
Mrpl58	0.833197	29.2601	29.3536	26.0351	23.9538	18.0829	17.4377	16.0283	18.6024	19.5547	20.0817	26.5762	15.5366	26.5852	19.1256	23.6919
Mrtfa	0.000939026	5.75415	6.63981	4.36765	4.53829	6.07899	4.99416	5.62887	5.02586	4.0635	5.01747	4.20758	1.58241	1.40664	2.40474	3.23842
Mrtfb	0.261604	1.29504	0	0	1.71071	0	0	1.56802	0	0	2.55034	2.46954	0	0	0	0
Msmo1	0.195864	34.0343	30.4528	26.7389	28.3863	22.054	37.855	26.2531	15.5116	12.8894	15.8753	20.7464	4.29768	192.373	27.828	77.6584
Mterf1a	0.0483704	2.39917	1.34328	2.82947	2.18518	0	1.69083	1.9537	1.71846	0	1.0681	1.03146	1.01082	0	0	0
Mterf1b	0.0225947	1.86627	0	1.71499	1.29904	0	1.10083	1.16497	0	0	0	0	0	0	0	0
Mterf2	0.490024	2.30887	1.31571	2.11102	2.28001	0	1.00975	1.26613	1.19457	1.20389	1.68502	1.56938	1.3112	2.04369	0	0
Mterf3	0.626687	6.99757	4.17213	7.12816	5.73921	3.81969	4.29828	2.82498	4.65174	3.49969	5.32267	3.82078	2.95918	4.76097	3.05728	5.75221
Mterf4	0.977395	6.89791	5.15081	6.47711	5.58273	3.62916	4.79718	6.17085	5.72879	6.05087	4.4315	5.613	6.62301	6.68679	5.08015	4.10555
Mthfsl	0.0227735	9.10387	7.5783	9.4515	10.7785	10.2952	11.3114	16.6958	17.1695	14.4635	21.0702	20.6701	28.2664	21.1574	12.7337	15.708
Mtrex	0.0132359	28.4608	15.1485	20.8475	19.4061	10.695	11.5977	7.21123	6.78016	8.44822	6.70599	5.58504	4.42032	4.08227	2.15847	4.46467
Mtss2	0.0198547	7.2226	6.10561	2.96094	3.21997	4.34478	2.3536	2.53563	3.16018	2.77136	3.15456	2.81989	2.39852	0	0	0
Mydgf	0.459445	35.8339	42.4392	30.5171	26.7541	35.3476	31.6357	29.9949	29.5584	36.7419	30.1057	34.71	28.1203	36.7226	47.8337	38.0388
Myorg	0.00172253	0	0	0	1.19659	1.73158	3.05819	2.68478	1.69709	3.10568	6.33381	7.10078	7.24672	6.70562	9.23677	7.0839
Naa38	0.194839	44.2316	53.3073	42.0798	37.7576	38.023	31.4506	31.049	28.333	33.4557	29.4739	34.8259	35.1373	34.1292	42.6732	32.7247
Naa80	0.000250285	10.6541	13.0441	11.1845	10.4118	12.1732	9.99708	11.2197	11.3682	10.3077	12.1237	10.3035	19.2137	26.4809	26.0442	32.8283
Naprt	0.000117833	16.3767	27.2212	25.4167	29.3481	36.028	25.7802	21.587	34.239	33.9782	39.8123	49.7354	62.9318	72.7743	86.8499	73.415
Nat8f1	0.0154689	2.17717	3.12584	2.95681	6.42806	10.4177	24.1482	49.5136	9.90959	20.5963	23.2249	27.9601	30.6789	118.214	251.909	110.237
Nat8f2	0.0185417	0	0	0	0	0	0	0	1.44705	3.49107	3.96527	9.21229	6.21485	79.3805	222.65	298.688
Nat8f4	0.00984982	0	0	0	0	0	1.68737	2.32189	1.71375	1.52858	2.03064	1.31639	1.73314	5.22426	2.84738	3.7655
Nat8f5	0.0759196	0	0	0	0	0	0	0	0	0	0	0	0	0	33.0957	20.95
Nat8f6	0.0803478	0	0	0	0	0	0	0	0	0	0	0	0	0	3.22692	1.8945
Nat8f7	0.32592	0	0	0	0	0	0	0	0	0	0	0	0	0	2.11098	0
Natd1	0.00187846	8.65239	10.8147	11.1178	10.2503	10.1181	6.15991	3.69669	3.3405	5.231	3.58095	2.83218	2.04819	1.33705	1.69653	0
Naxd	0.00202696	15.1606	14.4641	14.4912	15.681	17.5013	14.0567	19.4061	21.7644	22.6197	23.6746	24.4313	27.4703	31.1814	33.0111	19.4803
Naxe	0.315249	46.3276	65.4595	44.1916	50.9888	73.2713	63.1322	55.6409	50.414	67.4022	77.4712	85.977	75.2486	64.9739	79.5252	47.0946
Ncbp3	0.00385957	15.4517	11.7033	14.37	11.6123	9.3991	7.82451	5.48043	6.85332	6.19619	5.4509	4.18011	2.87266	3.28146	2.5813	2.41766
Ndufaf8	0.892702	18.847	26.6849	18.7379	16.4352	17.4686	17.3794	12.422	17.6736	18.2874	16.6454	17.4167	14.1018	22.4976	23.8901	15.1142
Nectin1	0.0013385	2.54758	3.26409	2.63479	3.44646	4.74205	3.89908	5.3522	6.44617	7.39516	10.4795	13.1122	13.0923	10.5158	13.5794	8.44611
Nectin2	0.0640353	16.7053	17.8831	10.1627	10.1869	11.5049	11.4411	20.4787	27.0675	18.1477	21.4982	19.3816	22.7725	16.7706	39.7272	20.4262
Nectin3	0.00189409	2.8159	1.5421	3.12777	3.3697	2.2567	2.56	4.44565	8.6899	10.6845	16.728	15.1108	13.132	12.5124	5.54405	6.65817
Nemp1	0.287216	4.58659	4.12758	4.81529	5.33288	3.97238	5.08825	2.99053	3.78642	3.99076	4.32059	3.32724	4.49259	4.41693	2.93276	2.04852
Nemp2	9.45631e-05	1.83991	1.46702	1.59854	1.36901	1.12238	1.04391	1.34077	1.34943	1.5745	1.22924	1.09074	0	0	0	0
Nepro	0.0255226	4.55413	3.54863	3.05329	2.72734	1.85311	2.06384	1.55788	2.40685	1.74838	1.62782	0	1.96362	0	0	0
Nifk	0.0206209	36.0421	22.0731	28.4084	25.678	12.7499	16.8371	16.5347	18.5559	12.3695	11.2973	10.672	8.67743	11.3565	7.42704	8.92318
Nipsnap2	0.0121029	14.6257	10.9545	13.2806	12.1771	12.63	11.7204	10.1723	15.7277	8.91489	10.2351	7.00702	8.71363	6.74956	3.7306	4.00821
Nkapd1	0.143767	6.22471	2.70484	3.92138	4.06409	2.57874	3.97119	3.4838	3.86519	3.37811	3.52129	3.00817	3.8592	2.08212	1.05372	2.22147
Noct	0.00292411	23.5795	17.3732	18.9978	21.0172	18.3449	12.0311	6.40662	6.40465	9.18711	4.75294	6.32616	1.21678	5.66752	0	3.95492
Nol4l	0.0086282	5.13999	4.42971	3.61174	3.14031	1.86981	1.30075	1.12479	1.71512	0	0	0	0	0	0	0
Nop53	0.0416917	127.804	170.41	109.719	97.6093	107.367	76.0758	73.7885	101.044	59.6734	54.0373	50.2421	61.4151	61.8938	74.6831	48.733
Nsd2	0.00235904	20.7366	14.4304	20.1953	17.4323	12.2411	9.81849	6.64645	6.02001	7.71983	5.84378	5.03991	1.99153	2.23393	1.06991	0
Nsd3	0.00316494	12.5476	9.88373	13.7871	12.045	10.2154	12.1016	8.61233	7.72789	8.1921	6.01237	6.85294	6.50731	7.94911	8.38248	7.18409
Nsmce3	0.0495048	5.00927	5.41631	5.32426	4.39432	4.23101	4.22364	3.34786	3.88687	3.19657	3.19243	3.56568	4.56309	3.23402	3.51621	3.10642
Nsrp1	0.418899	8.08764	3.43847	8.14454	7.4696	2.21051	6.425	6.09684	6.99292	4.35556	4.61954	9.16838	6.65502	4.59625	1.24926	4.07388
Odr4	0.700735	5.23814	1.51807	5.6797	5.32749	2.0603	6.09846	3.88936	3.97129	4.16363	4.67747	5.69739	5.64763	6.62388	1.69368	7.1865
Oga	0.00252391	21.0116	13.9885	20.1463	19.3315	14.2724	14.3165	14.0462	11.9726	12.128	11.1484	8.851	10.4789	7.82899	4.78496	7.16874
Otulin	0.170868	21.3231	22.1637	22.795	18.1993	16.0017	14.9828	13.0868	18.4194	16.9739	15.4232	15.8699	16.8239	19.0269	26.8016	27.8493
Otulinl	0.00169704	1.95312	2.12672	2.41626	2.69975	2.63114	2.64508	3.02325	4.58747	2.92826	2.8431	2.25996	1.53944	0	0	0
P3h1	0.00975049	10.4444	11.7012	8.52455	8.44889	10.5392	8.91365	13.1938	9.58328	10.3125	10.38	10.1757	8.02337	6.4717	6.36688	6.35171
P3h2	0.00203592	1.68752	1.92999	1.90679	1.90982	1.84506	1.40791	1.05007	0	1.55222	1.72457	1.23607	0	0	0	0
P3h3	0.101527	5.91731	3.99259	2.97858	2.73141	2.85487	1.91082	2.54106	2.55551	3.40029	4.20435	3.65433	3.08883	1.76697	0	1.32159
P3h4	0.159632	6.34573	5.64479	2.33543	2.34375	2.70879	1.88013	1.93606	4.92834	2.74722	2.44258	2.60361	3.1914	1.18683	0	0
Pacc1	0.00029697	4.7716	4.41625	3.65701	3.78676	3.05612	2.79165	2.79577	2.32314	1.95445	1.88992	1.71664	0	1.07659	0	0
Akap2	0.283105	0	0	0	0	0	1.17212	1.38624	0	1.14924	1.89283	1.33386	0	1.35362	0	0
Pakap	0.0227751	1.11519	0	0	0	0	0	1.20541	1.27926	1.95556	1.98742	1.79945	1.73528	1.19628	0	0
Patj	0.208746	0	0	0	0	1.65958	0	1.19033	2.65483	1.32752	1.92477	0	1.74785	0	0	0
Paxx	0.0449842	3.96651	5.00043	4.00248	2.7959	3.74189	5.80448	5.9227	7.60259	5.79898	6.21992	8.05206	5.55387	13.1394	27.3637	10.156
Pbld1	0.0585754	1.23798	1.41585	3.64592	8.14025	31.3291	45.5844	51.0542	24.3255	32.5318	47.9658	56.8615	74.1952	71.5077	43.7449	36.9974
Pcdhgc4	0.0318206	8.41404	9.21827	4.12682	4.55832	6.19258	5.75804	5.70995	6.54989	6.60872	9.02838	8.1092	5.7043	4.16615	2.34455	1.80015
Pclaf	0.0023502	60.7594	41.3958	59.4696	57.3746	28.343	33.9291	19.4062	18.646	20.8238	13.5302	13.535	4.32967	3.47596	0	0
Pcnx3	0.033697	23.71	21.5104	16.7128	11.5051	12.984	10.3667	9.45388	10.1986	7.89079	7.8863	7.4187	7.99508	7.3274	9.07574	6.23174
Pcnx4	0.0222846	1.91914	1.14295	1.45615	1.18914	0	0	1.20681	0	0	0	0	0	0	0	0
Peak1	0.0295811	2.06912	1.72225	1.67483	1.42034	1.40964	1.33894	1.52807	1.36008	1.71359	1.92593	1.45909	1.61211	1.04802	0	0
Pfdn6	0.0131772	105.523	130.974	98.6252	80.0371	80.5258	54.387	51.7619	46.2047	41.4109	34.1368	36.1956	32.0646	42.4179	57.2252	42.2399
Pgghg	0.023577	6.29001	6.483	5.14549	5.39116	5.67324	5.4559	6.8625	6.63831	8.25848	10.2711	10.118	12.82	8.63281	9.41529	6.28562
Pgm1	0.90256	28.8016	35.146	32.1816	50.1415	139.941	115.021	100.288	78.3769	75.1423	83.5788	85.3107	82.4515	85.1736	87.9895	59.4577
Pgm2	0.00676008	14.2204	12.8842	11.4514	9.44527	7.61556	5.21818	6.03454	5.01466	5.73583	5.57153	5.76758	3.81077	2.65816	1.35755	1.4105
Pheta1	0.406977	3.91124	5.29525	3.91978	4.22565	4.72854	4.2035	4.3486	5.21857	2.81465	3.27107	3.21543	3.27576	5.06534	4.46227	2.86495
Pheta2	0.000752604	22.8083	26.8121	29.6048	25.0595	29.1085	13.8628	11.1272	7.68365	8.94318	2.48749	1.3491	0	0	0	0
Pidd1	0.00287052	13.6412	15.2596	12.876	10.6441	7.57714	7.22897	4.03374	4.37324	4.77783	2.64043	2.58512	1.01025	1.37944	0	0
Pimreg	0.0137758	20.9224	21.2459	14.3825	12.3247	10.4715	5.73682	3.87665	4.60868	4.70678	4.25096	3.6379	3.85193	0	0	0
Pip4p1	0.00259472	24.7031	20.708	18.6514	20.2745	18.4923	17.9548	19.1263	17.0201	13.6584	12.0699	12.5543	14.186	15.2604	14.8406	14.4112
Pip4p2	0.0500721	15.3058	11.2517	11.622	10.3504	6.81867	7.0452	5.73527	7.31744	7.96207	7.65645	6.96603	6.87125	4.61669	4.13297	3.7259
Plaat3	0.00380112	14.9434	15.5028	23.2311	22.3687	9.98982	13.3857	10.4471	6.67702	7.97769	5.8093	6.30384	5.70895	5.80835	2.53376	1.82714
Plet1	0.332521	0	0	0	0	0	0	0	0	0	0	0	0	0	1.39049	0
Plpbp	0.00306381	9.76759	9.26464	9.12836	7.94195	6.91068	7.21067	6.66079	7.11039	7.44642	8.35652	8.87457	10.9163	13.7187	16.0065	11.1872
Plpp1	0.0767093	12.1036	16.8316	15.9319	17.9285	19.1212	19.7288	15.6342	23.5734	24.4979	24.9269	19.6638	17.3688	24.1478	6.92584	4.385
Plpp2	0.00884285	16.6708	24.7944	14.635	20.3555	25.674	21.5374	21.2746	24.656	26.1988	23.7726	24.2166	16.4487	16.0881	15.8645	10.6611
Plpp3	0.00191541	7.29018	6.21952	6.91802	7.35748	10.7192	13.9827	17.3537	26.0145	24.6539	40.3933	28.8163	39.3006	38.9839	21.3605	24.4291
Plpp5	0.013996	18.0198	17.764	22.4204	19.7858	22.6561	29.7742	22.4163	21.9119	23.5468	23.4288	25.4456	22.178	8.32138	6.94593	8.54758
Plpp6	0.00493112	1.90481	2.17996	2.04764	2.76036	3.17836	3.33156	3.94193	5.05186	4.64903	4.67932	5.3674	5.06287	4.29427	4.05915	2.90207
Plpp7	0.0825152	1.56083	1.87935	0	1.04259	1.23587	0	0	0	0	0	0	0	0	0	0
Plppr1	0.000266335	0	0	0	0	0	0	0	1.32317	1.76691	2.28775	2.46405	0	1.05466	0	0
Plppr2	0.650102	3.26135	3.41221	1.86284	2.6528	3.20435	5.12111	6.83399	2.77563	2.76721	2.69973	3.66255	3.26882	5.60747	2.16841	4.3169
Plppr3	0.000340595	4.98256	4.41362	3.57847	5.17798	4.71616	3.8742	3.50836	3.27067	1.60576	1.63884	1.56721	1.71506	0	0	0
Pnisr	0.0400372	19.6504	8.92912	18.3483	16.9103	7.21842	15.0309	14.0891	10.5179	10.6525	8.53599	10.0069	10.4965	7.29387	1.07178	7.0583
Poglut2	0.00415599	12.4748	8.33892	10.135	8.37305	5.1628	7.57967	6.6974	4.31982	5.24889	4.97163	4.77442	3.75934	3.63568	2.15681	2.94872
Poglut3	0.0478346	3.4689	2.07299	2.48236	2.73427	1.91198	2.42631	2.31451	1.53241	2.3069	3.21466	2.0123	2.05347	1.32394	1.1153	1.14879
Ppp4r3a	0.0343509	22.1349	12.4715	19.8727	19.183	9.97022	13.96	12.0391	12.1554	11.1309	10.3757	10.6771	9.30305	10.0091	5.97513	9.29399
Ppp4r3b	0.049789	12.2553	3.51958	10.1486	13.2151	4.35013	8.27134	5.8402	6.2684	4.19885	4.84612	4.32741	3.82557	3.39547	0	3.67306
Prag1	0.00051247	2.72402	2.03111	2.081	1.73598	2.42052	1.90406	2.13299	1.48531	1.32657	0	0	0	0	0	0
Prelid3b	0.00939508	53.5775	40.5184	50.5481	43.5037	27.6719	29.6469	20.923	25.3229	28.7868	20.2196	25.9947	10.3971	16.6115	12.3153	15.3343
Primpol	0.0219224	4.60157	2.60011	4.26088	4.28062	2.22707	2.19231	2.0854	0	2.26837	2.29447	2.20509	1.81365	1.09928	0	0
Prmt9	0.375783	6.45679	4.06475	5.42448	4.30108	2.93868	3.13957	2.1276	3.52365	3.15044	3.55837	3.52528	3.44046	3.44182	2.73053	2.43957
Prorp	0.404129	4.70144	4.14375	3.90889	2.87827	2.32208	2.11861	1.70146	3.5731	1.78565	1.91861	1.74804	2.11902	2.79742	3.18522	1.80337
Proser3	0.00126751	3.32415	2.73114	2.47984	2.60674	1.92454	2.16813	1.87935	1.21342	1.081	1.18692	1.35684	1.5158	0	0	0
Prune1	0.0096466	7.89865	10.1189	7.9696	6.90718	7.37586	5.38028	4.31923	6.82873	7.44158	8.22603	7.37557	4.98934	3.08645	3.39714	2.78652
Prxl2a	0.599033	33.8914	29.9448	48.2994	46.0754	37.2403	75.0639	73.3177	39.7991	41.4918	42.8487	38.6322	69.8732	36.9799	21.7327	23.6789
Prxl2b	0.0197482	6.36491	7.92581	7.06508	6.93542	6.22318	5.45041	5.25978	3.88678	5.75685	6.58516	7.19791	6.96457	13.9207	25.7147	14.0546
Prxl2c	0.0474366	6.9242	6.57598	6.04332	6.55131	4.9942	8.35758	10.8828	15.2227	7.81613	11.6808	9.38821	30.3779	15.8106	10.5019	11.8988
Ptpa	0.00356382	68.418	138.628	71.5248	82.4597	93.1927	70.9705	39.455	36.013	31.698	27.5093	20.5179	14.9199	15.9839	18.2627	10.8106
Pum3	0.0913941	24.0068	12.7107	16.7631	14.156	7.43146	9.76896	8.25206	14.2364	9.7751	8.55951	8.55982	6.25378	7.94205	3.97427	5.51239
Pwwp3a	0.0184551	18.1311	16.1779	9.07921	11.0936	9.52253	7.22104	4.76434	7.3677	5.09525	3.81333	5.37033	3.69707	3.55463	2.14845	2.05562
Pxylp1	0.14291	0	0	0	1.16903	3.08359	1.69962	1.8815	2.16698	1.26482	1.87341	1.70815	0	1.00981	0	0
Pym1	0.112543	21.9783	22.5348	14.164	15.5092	15.3993	10.1396	9.06098	15.9043	10.1473	9.95083	12.9649	10.8933	7.58032	9.79392	8.70406
Qtrt2	0.0845867	4.80889	2.37214	3.93932	3.29576	2.21862	2.37695	2.34623	2.78052	1.9532	1.90053	1.80514	2.69294	1.85403	0	1.43521
Rab1a	0.336591	48.8564	30.4933	40.8752	41.2132	29.8768	28.5376	27.6002	38.5773	38.3698	42.4442	43.8774	44.6496	31.4711	22.0702	29.2489
Rab29	0.0423338	5.7133	8.34464	6.23402	6.62487	6.65999	5.16268	5.25045	6.74652	6.34591	7.20024	6.1038	6.5038	8.62805	11.5344	8.80945
Rab5if	0.0824627	120.25	140.405	100.32	81.6697	90.0606	70.9276	63.7454	80.0961	66.1765	38.4917	32.8929	45.7893	90.1097	82.5718	54.1559
Rab7b	0.00420178	0	0	0	0	0	0	0	1.14304	1.08805	0	1.17347	0	0	0	0
Rack1	0.0055696	798.657	1195.45	662.163	595.595	676.357	452.397	521.967	433.968	318.146	223.232	210.993	225.487	218.134	207.98	141.039
Ramac	0.169274	24.9056	20.9829	23.7598	23.6282	12.8988	22.6903	19.9541	21.8677	21.1171	19.8982	15.6272	16.5536	21.348	13.6276	12.3447
Rbis	0.0433139	56.1655	34.5752	46.3623	44.38	29.9061	31.4808	24.7346	25.8044	29.5164	23.7062	27.0273	22.9646	30.9001	13.9128	19.0099
Rbsn	0.00605953	5.17261	3.76531	4.82907	4.16735	3.16596	2.94139	2.44652	2.24271	2.5224	3.02476	2.72337	1.84655	1.62215	1.24865	1.67052
Rcc1l	0.512814	15.5203	18.0332	11.6923	9.77585	7.95648	7.37359	8.05568	11.4504	9.34779	9.41183	9.29897	8.06073	9.56637	10.2567	7.2881
Rdh16f1	0.0492755	0	0	0	0	0	0	0	15.8304	29.1209	42.3006	50.3772	89.7281	101.754	6.13001	5.31756
Rdh16f2	0.000240625	0	0	0	0	0	1.344	2.77358	4.70098	25.8064	29.157	34.8419	47.8575	79.6137	68.1504	44.3094
Rec114	0.00129079	11.7396	8.48688	11.4175	6.68126	8.3226	8.7442	6.19741	6.60593	3.23182	0	1.3979	0	0	2.58888	0
Relch	0.254476	4.09677	2.39467	3.46314	3.07037	2.20607	2.53551	2.46719	2.97529	2.69163	2.82877	2.00706	2.82699	2.42437	1.21542	2.0324
Resf1	0.0410325	5.11857	1.07873	5.04763	6.09449	1.65498	5.1099	3.83641	3.15307	2.40234	2.07879	1.84615	1.34537	1.46042	0	1.65153
Retreg1	0.101264	0	0	0	0	1.03072	1.86452	2.30677	2.33756	1.43732	3.11232	2.79593	2.05171	5.38888	1.38575	1.14214
Retreg2	0.484584	49.7694	63.3596	52.2481	50.2165	56.1137	39.4402	36.6381	50.7957	47.0017	52.9025	43.5811	53.9665	52.3215	74.5335	45.1359
Retreg3	0.0832461	22.0522	24.8334	24.0767	23.2663	24.8033	22.1774	17.2119	17.9092	18.1106	17.3142	15.9268	19.9949	17.1043	26.8138	15.9688
Rex1bd	0.128969	35.4638	49.7981	34.189	31.9177	28.6711	27.7469	22.8686	26.5083	24.2399	23.7897	23.9498	31.883	38.6139	49.9948	29.6345
Rexo5	0.00133273	3.08481	1.7383	2.94196	3.10032	1.93646	2.57082	2.04763	1.07007	1.49987	1.42738	1.89046	1.26982	0	0	0
Rflnb	0.0158659	2.01911	1.52198	1.8897	2.30765	5.02809	4.76367	4.3654	6.10102	3.27531	3.52989	2.49258	1.17469	0	0	0
Ric1	0.176184	3.38971	2.83402	3.27917	2.96259	2.7938	3.27088	3.01521	6.47532	3.5469	4.21994	2.72869	5.06442	1.81699	1.09555	1.31067
Ric8a	0.04203	14.5679	14.3869	9.53208	11.3029	10.9255	9.55327	8.43785	13.4665	7.97138	7.39755	5.66119	7.04395	7.10788	5.69526	5.62764
Rida	0.000549136	21.4031	12.0131	22.3708	38.3767	23.3148	78.4634	99.0403	120.908	76.6147	140.102	203.49	293.09	353.581	180.822	320.889
Riox1	0.0210143	15.7828	19.3153	11.1246	10.7814	9.19536	5.93426	5.61482	8.71914	4.89679	4.41999	3.96944	3.1823	2.7547	3.25745	1.9195
Riox2	0.0548205	13.0086	9.56169	9.01168	7.16529	4.76504	4.07269	4.58108	3.30323	4.34163	4.25466	4.48462	2.99255	3.69698	4.00702	2.92364
Ripor1	0.00750823	11.3096	12.9911	8.06175	7.49472	8.29863	6.82314	6.83034	8.38891	6.01657	5.94512	6.54637	5.02625	3.19058	3.27403	2.23443
Ripor2	0.429024	1.20241	0	0	1.06704	1.06381	0	0	1.23325	0	0	0	0	0	0	0
Ripor3	0.0134499	4.71347	3.46543	2.10191	2.1837	2.78335	2.76325	2.45259	3.05536	2.35831	2.56524	1.44572	1.52448	1.47949	0	0
Rita1	0.00985196	4.95257	5.61229	3.66556	2.52363	4.00716	3.30627	2.5441	1.46347	1.60448	1.77021	1.66641	1.13754	1.56488	2.96004	1.82407
Rmc1	0.000205708	22.8703	18.1511	23.0598	28.3302	20.7857	19.9787	15.6466	10.1626	9.97504	6.89096	6.51976	6.53368	5.94793	5.4299	4.1073
Rp2	0.143856	3.89751	1.58342	3.82111	3.76121	2.09735	2.53467	2.28308	2.4541	2.58736	2.5638	2.0684	2.72916	2.05341	0	1.29252
Rps27rt	0.0120695	82.9635	96.2407	65.7768	69.5443	66.7268	61.1047	59.7945	77.2848	44.9154	34.8873	26.4954	44.8394	34.1473	30.4029	29.2701
Rsrp1	0.339448	81.8513	82.4741	89.1042	105.49	94.0253	165.051	164.321	68.1355	60.6315	67.8313	81.488	105.246	173.855	20.9478	124.479
Rtf2	0.845599	36.0123	40.557	34.8217	29.3193	30.1863	29.7984	30.8164	39.3484	32.1592	34.8807	34.4416	50.3697	23.9329	30.798	24.1126
Rtl10	0.00275599	5.18331	4.50008	3.82843	3.35387	2.30865	2.00099	1.6453	1.83658	1.38275	1.7355	1.46111	0	0	0	0
Rtl3	0.0916296	1.05538	1.18916	1.14495	1.69391	5.74717	6.17586	0	0	0	0	0	0	0	0	0
Rtl5	0.640226	1.22001	0	0	0	0	0	0	0	0	0	0	0	0	0	0
Rtl6	0.369899	1.01183	1.10683	0	0	0	0	0	0	0	0	0	0	0	0	0
Rtl8a	0.0781816	6.23882	7.34272	4.98737	4.78996	5.04812	4.91891	6.70884	6.88069	8.07074	7.33616	9.70526	6.77681	9.5204	9.38994	4.9343
Rtl8b	0.555636	8.39551	8.34816	5.21191	5.72791	5.76524	5.75104	9.19689	7.15507	8.25878	7.16342	9.75218	6.15558	8.79798	8.7605	5.82074
Rtl8c	0.00349495	3.15533	3.14975	2.24091	2.29494	3.50059	2.74162	3.43069	4.56515	4.55666	4.57576	4.79175	3.11026	3.12577	1.14104	1.07042
Rtraf	0.325715	52.6414	50.8629	47.092	40.0879	29.3221	30.7051	29.172	47.0854	41.9545	39.0001	46.445	38.5752	40.8321	27.3603	27.2962
Rubcn	0.35951	3.53427	4.2746	3.93698	3.53509	3.35485	3.14473	3.35989	3.60375	3.856	4.56428	3.69447	4.19606	3.48255	3.31063	2.41096
Rxylt1	0.148929	3.0299	2.78352	2.98332	3.60359	1.58394	2.50817	3.06012	4.25656	3.17162	4.64905	2.88266	3.69605	2.897	2.10656	1.88197
Sap18b	0.00611795	52.5513	60.1463	52.9279	48.0058	40.8173	33.863	40.9278	35.5131	38.1019	33.6212	36.8694	28.6493	28.2608	29.7321	25.4801
Saraf	0.00960048	30.4402	30.394	26.7348	30.4007	37.2345	40.897	43.9788	38.0409	41.0496	43.5229	46.0833	43.2244	48.8519	72.9855	65.5845
Sdhaf3	0.435569	1.08414	0	1.0817	1.11384	0	0	0	1.19811	0	1.09888	1.45038	1.25804	1.12855	1.20931	0
Sdhaf4	0.0514423	11.9162	8.6404	8.99605	8.49649	5.72846	9.02542	10.1828	9.57711	13.8322	7.90267	13.496	9.99243	15.1359	14.3007	14.2327
Selenoh	0.0152687	94.0676	115.401	78.0791	65.9776	52.9817	36.6244	29.4173	27.3354	34.5389	28.2753	32.9584	25.7337	19.2888	6.2134	4.19327
Selenoi	0.968236	7.20151	5.51679	6.99886	5.81719	4.6969	3.99106	3.96077	4.49936	5.18448	6.3806	5.25679	6.40077	6.09037	5.13354	4.51848
Selenok	0.495778	49.1905	40.3043	51.7758	53.9219	53.1003	115.006	154.342	49.2364	52.4313	42.4083	47.9046	58.1065	63.2792	57.6648	90.5977
Selenom	0.00329752	6.71037	8.06097	5.77067	5.40987	5.69443	5.47961	4.55927	5.17371	5.68825	4.23577	5.72313	4.07489	2.47609	2.09717	1.2731
Selenon	0.00437171	9.71238	10.3829	6.00572	5.65029	6.24628	4.37261	4.91664	3.52547	5.02715	4.56549	3.34628	2.46628	1.53417	0	0
Selenoo	0.00101686	5.77623	6.00949	4.66035	5.15014	7.51304	7.21875	7.75949	7.53322	10.2571	13.647	14.3156	13.8989	22.7142	27.2774	18.4706
Selenop	0.00779222	150.299	119.166	117.015	371.29	477.867	941.759	1314.98	1732.86	1639.69	1870.22	1963.22	3101.03	1787.79	1241.47	1190.63
Selenos	0.024318	29.0025	23.5558	29.0348	35.0171	27.0944	43.4525	40.0753	54.6802	47.3792	39.3458	47.6821	39.6087	57.7287	38.2978	48.7344
Selenot	0.817587	39.5347	22.1487	35.3785	33.1964	20.4015	29.6702	24.0107	24.9218	30.5201	29.37	29.6964	27.5951	32.8258	17.3194	28.7167
Selenow	0.00459782	339.413	416.728	282.861	262.477	208.529	204.751	118.039	89.2333	95.0473	65.716	73.0493	57.1286	88.1892	95.3617	71.564
Sem1	0.0111971	66.6336	48.3557	66.6396	60.003	43.7127	56.5164	51.2467	54.1397	46.2373	37.3638	45.759	42.1806	40.3404	26.0033	28.7373
Sf3b6	0.00199512	46.8945	36.8013	44.3304	38.5093	28.9211	31.0209	24.0956	25.1422	18.6142	15.7304	16.6305	13.4006	17.7644	13.6813	12.8957
Sgf29	0.0975428	15.7632	19.3464	14.8854	13.6473	12.2439	9.45537	7.71739	9.92808	9.06103	8.73161	8.35359	6.63048	10.3461	11.4279	9.36544
Sgo1	0.002663	10.0043	5.85612	10.5235	9.12873	5.04279	5.75868	3.02615	3.22331	4.1183	1.89325	1.9847	0	0	0	0
Sgo2a	0.0164623	5.39026	1.6559	5.29253	5.50553	1.50989	2.57684	1.52636	1.29109	1.77511	1.39148	1.38731	0	0	0	0
Shfl	0.00119658	4.71063	4.46263	3.71093	3.81366	4.17956	5.63497	10.7588	9.37043	10.5414	19.9902	18.6376	18.4564	15.6222	20.3411	22.9225
Shld1	0.0271311	4.82572	5.78041	6.33181	5.13669	4.06012	4.22409	2.9261	1.37413	3.84435	2.84868	2.57796	4.09251	3.19323	2.75398	2.06041
Shld2	0.0769154	2.22285	1.59431	1.73358	2.49858	1.73956	2.92821	4.75162	2.36038	3.10143	3.65362	3.29871	3.74088	4.74523	3.1065	8.0891
Shtn1	4.93916e-05	0	0	0	0	0	1.13053	1.26263	2.69165	3.42972	4.56795	3.83986	4.45931	4.32458	5.11869	5.53607
Siglecf	0.641271	0	0	1.14236	0	0	0	0	0	0	0	0	0	0	0	0
Sinhcaf	0.0389718	13.8751	6.20972	6.48812	6.08459	3.09973	2.9881	2.88076	2.34643	2.38824	2.17731	1.64483	1.10182	1.22556	0	0
Slc49a4	0.0267134	3.2793	3.58414	3.8625	3.68919	4.05935	3.04645	2.78577	2.64979	2.59825	2.53396	2.3569	3.04808	4.24586	8.79257	8.36452
Slf1	0.00584595	5.39797	2.23889	3.98823	4.66157	1.56764	2.4434	1.9117	1.5987	1.81214	1.3275	1.52901	0	0	0	0
Slf2	0.024004	6.67394	3.41302	7.2417	6.15792	2.45968	4.0861	2.9154	3.17704	3.34424	2.98311	2.74892	2.15229	2.15077	0	1.09494
Smim10l1	0.0455107	12.388	6.31981	11.7202	13.8477	9.52976	18.6282	18.4743	22.4806	20.7115	28.2166	27.4105	36.0433	22.3537	11.3594	18.1655
Smim24	0.000165919	1.47386	1.94938	2.022	2.14807	2.82522	2.03704	2.05647	2.38425	1.34981	1.99701	1.57987	0	0	0	0
Smim26	0.0919999	13.672	11.2011	9.08122	9.60132	6.53745	9.80074	7.34254	13.5211	8.79466	5.31348	7.46948	10.2229	18.8086	16.4595	11.3511
Snu13	0.00495145	108.876	106.067	90.2445	75.6747	61.2164	47.3653	39.408	36.5963	36.1121	26.1945	26.977	18.636	22.0051	20.8629	16.6467
Spaca6	0.130578	2.71165	1.43899	2.84145	2.05201	1.20531	4.19175	5.76642	5.08785	3.76879	3.88234	5.32675	4.56685	1.19866	0	1.75563
Spaca9	0.39096	0	1.10343	0	0	1.58644	1.13306	0	0	0	1.1365	0	0	0	0	0
Spindoc	0.0656741	5.56999	5.12779	3.12552	2.51756	2.79956	2.0263	2.32088	2.54289	2.11726	2.09261	1.91347	2.09616	1.67115	1.34691	1.08193
Spink1	0.134064	8.73945	12.168	34.7566	63.6454	91.3501	198.053	69.8824	6.08879	20.3151	17.3476	24.605	10.3807	11.7306	0	0
Spout1	0.0325823	30.474	34.5119	22.7336	20.7127	18.0913	14.7527	11.0267	11.878	13.028	9.74045	11.0776	7.23182	11.1307	12.2902	11.5873
Sqor	0.000194355	1.35354	1.52995	2.01213	2.60522	5.19363	3.20756	6.84709	7.0992	19.5644	21.458	31.2754	30.3054	32.2306	35.176	36.4159
Srp54b	0.119595	19.821	9.87344	18.4085	12.9098	8.20956	11.7303	10.0251	9.7479	10.2279	10.5299	10.4511	8.9815	10.9401	3.04271	6.83446
Ss18l2	0.080326	22.8692	21.8905	22.7011	17.4878	15.8026	26.3086	22.7161	30.7833	23.7073	25.4617	35.164	23.6544	43.7289	25.2294	29.8152
Ssc4d	0.210725	1.78352	1.48373	1.30831	1.37362	1.02435	0	0	1.48664	0	1.04475	0	1.10224	1.12323	2.77439	1.79818
Stimate	0.00940879	5.13823	6.32472	4.44932	4.61098	4.3099	4.01647	3.78711	5.73072	6.17146	6.24611	7.1821	4.98644	4.04041	3.34486	4.08095
Stk26	0.00403167	4.9111	2.72044	4.54296	3.38846	2.2168	2.71663	3.24485	1.94451	3.63223	3.18648	2.08748	1.7262	0	0	0
Stn1	0.0145872	4.23989	5.32583	3.76037	3.0077	2.22136	2.24999	1.68952	1.8925	2.29661	1.7766	1.97251	1.35259	1.38028	0	0
Stra6l	0.00252685	0	2.36751	2.66825	4.32312	5.30331	7.59617	8.75436	11.1648	19.5012	22.9379	20.3906	13.6035	26.9339	44.7956	36.2347
Stxbp3	0.511032	7.01233	3.22215	6.20492	6.84448	3.65636	4.88508	5.50167	5.75704	6.03134	5.9397	5.15761	6.47769	4.54429	2.51728	4.58095
Sugct	0.000123046	0	0	1.1239	1.58231	1.4387	2.40229	1.39897	5.64312	4.84373	7.55348	5.33315	12.1466	9.58412	7.8867	7.77705
Sult2a8	0.000217147	0	0	1.21785	1.11577	0	0	0	5.98528	6.92406	22.5755	19.5999	43.8853	53.0044	78.2911	92.4101
Susd6	0.0627856	10.0109	10.2157	11.9035	10.783	11.6325	10.8318	8.75079	8.20298	8.20142	8.05337	6.34931	7.32382	7.14191	4.95055	12.3841
Svbp	0.00116805	80.0108	95.8054	89.5988	72.8434	58.7268	49.2196	36.6019	29.2255	26.9487	16.2424	15.733	11.4337	10.929	10.7453	6.44496
Taf4	0.00120613	10.0036	9.52389	11.168	9.96218	8.64882	6.75384	5.58854	5.95481	4.75489	4.95465	3.94744	3.47176	3.56953	2.46118	2.69679
Tarbp1	0.000527109	2.06569	2.41101	2.40962	1.58448	1.75361	1.3676	1.39637	1.08573	1.42958	2.18449	1.34344	0	0	0	0
Tasor	0.146569	2.80946	1.62258	3.56134	3.42087	2.19376	3.13415	2.66836	2.69929	2.50043	2.28454	2.22233	2.49406	2.27288	0	1.87418
Tasor2	0.075699	1.78062	0	1.47181	1.45824	0	1.17143	1.14982	1.07378	1.09752	1.12195	0	0	0	0	0
Tcaf1	0.229253	2.74723	1.34966	1.33698	1.18818	0	0	1.414	1.14641	1.11004	1.32944	1.9991	1.40044	0	0	0
Tceal9	0.00944707	135.126	62.4583	148.777	178.266	84.0905	174.517	123.369	107.832	127.58	111.23	140.062	80.3226	37.4324	8.81675	15.552
Tcim	0.68888	4.98024	2.13893	3.6759	5.64247	9.7996	20.1706	27.5933	10.5694	13.8775	19.3131	15.5288	15.3964	12.6474	4.07309	13.6037
Tedc1	0.0017244	7.66975	8.23437	6.95301	6.88699	5.56696	3.42326	2.96363	3.39773	3.28035	2.2965	1.81177	1.04825	0	0	0
Tedc2	0.0329366	13.3604	13.1718	13.5434	10.8798	9.42935	7.12976	7.88939	7.10829	5.9159	5.09786	6.26794	4.65442	19.6623	32.7291	36.1605
Tent2	0.0413273	16.9256	10.1026	16.8132	16.5186	10.4469	10.6054	8.89324	11.6969	11.7164	13.1128	12.2976	10.8487	8.48577	3.41925	3.7532
Tent4a	0.00131097	8.60733	10.5585	8.90863	9.74377	10.0391	7.02249	6.77769	6.99715	7.61573	6.8629	6.53167	5.65461	3.69873	3.289	2.9948
Tent4b	0.419959	8.63922	8.05798	8.95134	9.24769	6.64892	6.91414	5.81085	8.22722	7.38572	9.26681	7.12943	11.5485	5.12501	3.03408	4.24997
Tent5a	0.380797	5.75861	4.70373	9.12501	10.8825	10.5594	20.372	15.877	7.0107	14.5417	16.0843	11.7623	16.4613	5.4855	2.08349	2.43262
Tent5c	0.000358245	50.8749	65.2957	68.4843	82.1071	102.627	70.1491	49.5049	25.6228	34.242	12.3968	9.44418	1.90783	1.86716	1.27429	0
Tepsin	0.00785201	6.52978	5.82943	6.03396	5.71228	5.99902	4.64196	5.70449	5.81128	3.50177	2.73519	3.50116	2.80803	3.38884	4.18924	4.24307
Tex52	0.00195499	1.50541	1.64316	1.80332	1.45764	1.35725	1.29706	0	0	0	0	0	0	0	0	0
Tgfbr3l	0.00129143	2.0313	1.60461	1.64745	2.3403	1.73925	2.36388	1.88648	4.85997	4.93162	4.48727	6.08559	4.90635	3.72238	1.82598	2.70001
Thap12	0.102687	14.7157	12.1356	12.3465	11.9666	7.92744	7.60727	6.19945	11.7194	9.65985	9.57316	9.3092	8.12585	8.80525	4.62504	3.70081
Them7	0.000145362	0	0	0	0	1.0011	0	1.15717	2.56771	2.901	3.35261	4.23952	4.06979	4.53231	6.96934	5.04467
Tigar	0.0962511	1.14058	0	0	0	0	0	1.02416	1.7153	1.36841	0	1.10202	0	1.65412	2.1706	2.07662
Timm29	0.0151681	19.3728	21.5298	18.7714	14.6517	15.4874	13.4442	10.8669	12.5265	11.2744	11.8027	10.4946	8.05397	9.11747	11.981	9.66199
Tkfc	0.017007	11.5212	15.5965	15.9171	30.4805	60.2706	73.702	115.947	80.0503	164.165	196.699	195.515	186.832	81.7343	248.792	105.119
Tle5	0.0236636	147.362	208.915	162.345	159.939	202.627	153.479	143.453	157.871	201.752	188.472	234.644	176.571	319.473	597.438	395.278
Tlnrd1	0.000410406	30.8299	44.1559	33.4738	31.6738	37.2676	25.2128	18.7864	14.8253	13.7975	10.7889	9.5618	5.8132	2.71556	1.94615	1.62019
Tmem131l	0.000110896	11.8529	12.6593	14.1338	15.2282	14.131	13.4769	11.0123	9.89513	7.71382	6.19845	5.10696	4.49882	3.55251	1.84212	1.57335
Tmem185a	0.935173	8.85384	8.8791	7.37209	5.88763	6.25486	4.57946	5.14068	5.29831	6.89597	8.42327	7.59832	7.08384	8.02694	6.46229	5.98669
Tmem185b	0.00593588	8.2232	9.75351	7.00419	6.55601	7.23676	6.27661	5.57674	7.91024	7.75093	7.48774	7.66448	5.35392	4.32166	4.51785	4.083
Tmem263	0.0368982	5.62641	3.90761	5.09031	5.36696	3.69578	4.90217	5.97061	5.06322	5.14822	5.26638	5.44477	5.46994	2.7666	0	1.91649
Tmem267	0.674461	0	0	0	0	0	1.31985	0	0	0	0	0	0	1.2492	0	0
Tmem268	0.0582002	3.23116	4.86792	4.38872	4.8414	7.48834	9.48643	10.9968	9.19642	7.44577	7.1567	4.08761	2.8479	3.36638	1.93573	2.04244
Tmem273	0.638362	0	0	0	0	0	1.20076	0	0	1.41544	0	0	0	0	0	0
Tmem35b	0.275021	3.51287	4.1196	4.64626	4.25772	3.69135	4.10027	3.60603	3.80143	4.4917	4.64632	6.39891	6.12308	4.58539	5.03674	3.3711
Tmem94	0.0340783	11.5381	14.9048	10.5551	9.93855	10.772	7.47775	6.98429	6.17944	6.22025	8.41941	6.55939	7.17179	6.29036	7.41284	6.47501
Tnfsfm13	0.00129052	2.79862	4.91028	3.22761	3.59399	3.23378	2.67895	3.5029	5.3475	5.81196	7.62086	5.91489	10.6384	6.9882	8.12377	6.43487
Tns2	0.00173055	3.93749	4.08246	3.06702	3.018	3.57319	3.64502	4.63415	9.70909	6.21999	7.1211	6.82876	10.1379	8.734	5.67042	7.48206
Togaram1	0.338674	3.30102	0	2.55107	2.08417	0	1.64381	1.33216	1.30001	1.17234	1.22098	1.14449	1.12927	0	0	1.16667
Tpbgl	0.000441922	0	0	0	0	0	0	0	1.02171	1.49839	2.67069	2.7931	3.13898	2.79024	3.84288	1.76093
Trim80	0.159624	0	0	0	0	0	0	1.13668	1.268	0	1.48506	1.92752	2.25136	2.51792	0	0
Trir	0.00137609	201.792	231.903	197.21	178.288	177.082	150.589	131.284	114.913	103.44	72.3465	85.6753	70.6706	97.875	104.242	100.342
Trmo	0.00151716	9.62848	8.24834	15.7298	12.1991	8.41958	10.1531	6.43977	4.45157	5.96441	2.1952	2.22415	1.61365	1.79424	1.83182	1.28856
Trmt9b	0.350437	0	0	0	0	0	0	0	0	0	1.23046	2.12108	3.32314	0	0	0
Trp53rka	0.0290289	9.1532	10.0272	6.82163	6.09757	6.46005	4.92943	5.82032	5.84263	4.33569	4.82243	4.63828	4.89665	4.28348	4.3813	3.20754
Trp53rkb	0.00259222	2.57974	2.07848	1.41854	1.41766	1.40145	1.09593	1.38261	1.13368	1.07893	0	0	0	0	0	0
Tspoap1	0.000538314	4.19942	3.97035	3.60047	3.58174	3.42249	3.27344	2.07248	2.4941	1.36637	0	0	0	0	0	0
Tut4	0.129199	14.9394	8.36401	6.36816	16.8856	9.31024	17.048	14.8479	16.4791	12.429	16.0551	13.6396	15.854	7.65271	2.86621	2.23557
Tut7	0.0135399	18.0714	9.80257	20.6422	19.5527	9.96382	15.1482	11.1729	10.9909	9.73545	8.73312	7.8753	8.02286	5.92146	4.22446	7.49273
Twnk	0.00142322	11.1419	12.3351	9.6667	7.97049	9.93812	10.9149	9.6299	8.15661	6.4377	5.60262	5.18645	6.54294	6.62217	5.7381	4.87858
Ubl4a	0.0424853	37.8661	23.9479	20.8812	28.7659	30.0353	16.1713	15.0411	14.7309	17.6405	14.3236	16.4881	12.74	18.8578	12.127	8.67973
Ufd1	0.563197	16.7075	13.2359	15.9953	14.8437	11.1741	11.7834	11.878	17.0899	14.3947	13.1008	11.9265	11.6858	15.374	8.81514	13.1368
Umad1	0.144854	5.1929	4.32361	7.55926	7.36587	7.01193	5.33775	4.8339	3.09506	4.48145	6.52421	4.52554	5.18627	4.85343	3.83336	2.73886
Unc93a2	0.185966	0	0	0	0	0	0	2.5237	2.87889	4.85112	10.5764	8.39873	19.8571	2.22153	0	0
Uqcc3	0.30838	24.4037	27.7468	21.1077	19.7055	18.6616	22.509	24.0389	30.1824	21.381	17.781	18.4146	24.6388	33.6233	31.2081	19.7169
Usf3	0.0781257	3.5041	2.20235	3.54127	3.25147	1.6952	1.93135	1.20833	1.47368	1.36925	1.56551	1.35645	1.69151	1.8596	1.08074	1.36515
Utp11	0.0787845	20.3408	9.98974	15.803	13.5382	7.80363	9.89306	8.11864	7.68564	8.86836	7.80108	10.0865	8.33235	7.25545	4.01838	6.02556
Utp25	0.00935569	5.22998	4.39734	3.21836	2.94431	2.36027	2.39313	2.33709	2.02581	1.77087	1.65752	1.15926	1.28246	1.11966	1.25533	1.11633
Utp4	0.0263431	31.2067	26.1699	21.5747	18.3355	13.4078	10.121	8.1114	12.3066	8.30508	7.32925	7.03874	5.26083	5.686	6.06669	5.74252
Vcpkmt	0.0325081	9.7328	12.3391	7.55296	7.4051	5.97852	4.89755	4.20794	2.6984	4.21646	4.55312	4.98938	4.72568	3.86531	2.41938	1.21171
Vegfd	0.0361856	0	0	0	0	0	0	0	0	1.43616	1.22084	1.62724	0	1.40826	0	0
Virma	0.00584559	8.92943	6.53631	7.84484	7.03456	5.41865	4.2844	4.06329	4.6145	4.87163	4.93505	3.5683	3.06862	2.31094	1.63274	1.80188
Vps26c	0.111156	9.38445	8.8373	9.27191	9.04365	7.76436	8.12999	7.15747	10.3322	8.87995	9.1834	8.44401	9.85278	7.0771	5.8837	5.40204
Vps35l	0.00683333	10.2788	9.27412	10.2225	7.62161	7.79517	5.34222	5.16797	4.60162	5.26934	5.36095	3.28727	4.45449	3.6287	3.18642	3.37232
Vps50	0.0677385	5.93433	2.42033	3.441	2.99451	1.44404	1.81696	1.80749	1.90175	1.37322	1.44464	1.63999	1.65055	1.35596	0	0
Vsir	0.00141836	3.39836	4.31755	5.49383	6.38882	7.66766	7.73325	7.10413	7.77625	7.88303	4.60899	4.41012	0	1.24084	0	0
Wapl	0.0255426	17.9687	8.48329	17.4938	18.7759	7.86407	9.68274	7.13525	8.58784	7.21112	6.35003	5.27651	4.72018	5.61954	2.12385	4.03278
Washc1	0.035652	12.7221	14.6639	11.1566	10.322	10.2593	8.29934	8.24008	10.727	6.91475	6.65379	7.90456	8.58225	6.65241	6.90649	4.60128
Washc2	0.799009	7.72607	5.38327	6.68464	7.1428	5.19775	6.12118	6.21012	7.2772	6.46802	7.64323	5.58589	6.88175	7.26522	4.87228	6.39113
Washc3	0.26611	8.70214	10.8518	13.1614	9.36542	9.47498	12.2352	10.6939	12.9953	11.3542	11.8379	8.5135	13.6938	13.9116	11.7078	11.0547
Washc4	0.524012	3.1446	1.10606	2.45297	2.29751	1.02239	2.16872	2.11916	2.26267	1.99103	2.3055	2.16675	2.57075	1.96956	0	1.62908
Washc5	0.0685149	8.96949	9.26933	7.81966	7.37769	5.92024	4.92402	5.4658	6.82509	7.32289	7.95226	6.37104	6.07766	5.56327	3.83857	3.33235
Wdcp	0.0621895	1.36128	1.47324	1.63465	1.31283	0	0	1.00998	0	0	0	0	0	0	1.07849	0
Wdr20	0.109747	7.58761	5.05105	6.0296	5.6956	4.98828	4.62342	4.78583	5.01237	5.31792	4.85132	5.98468	4.60816	4.32952	3.76769	4.43345
Wdr83os	0.206346	48.0285	72.3634	47.3644	49.3007	56.8369	52.6061	41.5746	46.9201	37.9158	33.1968	37.1788	34.6218	53.4267	66.1645	38.1506
Wfdc21	0.0601683	0	0	2.05697	6.30421	10.2794	24.5689	24.9879	17.6352	8.7208	11.6547	6.92492	2.8937	34.1724	326.692	450.799
Xntrpc	0.0045973	7.90876	8.35386	8.37216	6.68978	5.14015	4.55014	3.68817	3.05164	4.98421	2.97481	3.3447	2.46927	2.80901	0	0
Yju2	0.120953	7.58978	8.57854	4.85497	4.31342	4.27276	3.25141	3.77664	4.3623	3.25764	3.15302	3.11764	3.05192	3.59977	3.38783	2.79775
Zbed5	0.0601597	8.80198	10.4203	7.45275	6.07088	8.80854	7.92073	8.01489	10.4632	7.93102	8.21853	10.1354	12.6441	9.52482	12.8912	9.20061
Zfp24	0.282072	4.11896	3.31458	4.06238	4.16243	2.90303	3.36228	2.99513	3.75012	3.99606	2.8114	2.70738	4.18162	2.70349	1.20324	2.49873
Zfp512b	0.0107552	10.2273	8.863	7.43552	6.86559	8.41136	7.34776	6.70498	11.6666	9.45417	10.4701	10.3601	8.32544	7.18386	3.2411	4.31484
Zfp607a	0.645762	1.15148	0	0	0	0	0	0	0	0	0	0	0	0	0	0
Zfp638	0.268599	5.28519	1.2611	4.1056	4.66853	1.09209	3.52182	2.43899	2.35056	2.68747	2.62162	2.68828	2.60861	2.11144	0	1.92283
Zfp65	0.36618	2.39049	0	1.64116	0	0	0	1.38331	0	0	0	0	0	1.30958	0	0
Zfp729b	0.641089	1.00538	0	0	0	0	0	0	0	0	0	0	0	0	0	0
Zfp969	0.00992945	0	1.52501	1.1158	0	0	0	0	0	0	0	0	1.47397	1.23987	1.71818	1.19152
Zfp970	0.0434988	1.03826	0	0	1.50669	0	2.17007	1.60781	2.53782	1.23034	2.40484	1.37556	1.90725	2.79756	2.09208	5.05897
Zfp971	0.550508	1.5264	0	1.93331	2.01775	0	0	0	1.19284	0	0	0	1.6515	1.0621	0	1.25459
Zfp979	0.639094	2.5697	0	0	0	0	0	0	0	0	0	0	0	0	0	0
Zfp983	0.363216	1.19184	0	1.35053	0	0	0	1.30842	0	0	0	0	1.03046	1.00303	0	0
Zfp984	0.054521	4.43444	1.12371	3.12991	3.68846	0	1.60135	1.48872	1.60419	1.15535	1.26673	0	0	0	0	0
Zfp991	0.0346359	2.46151	0	2.10346	1.64653	0	1.0154	1.12596	0	0	0	0	0	0	0	0
Zfp992	0.108402	2.59791	0	1.49144	1.49648	0	1.0013	0	0	0	0	0	0	0	0	0
Zfp993	0.0558123	3.71948	1.26473	2.03471	1.91865	0	1.45825	1.25286	1.54774	0	0	1.23764	0	0	0	0
Zgrf1	0.0100996	2.60611	0	2.35304	2.13072	1.01669	1.211	1.00059	0	0	0	0	0	0	0	0
Znrd2	0.00480377	38.6771	47.3869	33.9764	26.9299	28.0689	20.2582	20.1587	17.8755	15.4905	10.9748	11.1332	9.1779	9.96288	12.8907	9.32385
Zpr1	0.397889	18.4537	17.0622	13.822	12.0908	9.67027	9.29551	9.82784	14.9939	8.90003	8.33507	7.22075	10.2058	15.1321	11.1694	15.1238
Zswim9	0.563209	0	1.28339	1.29443	1.65162	1.21972	0	1.09594	0	1.63971	0	1.5419	1.50342	0	0	0
Zup1	0.0935188	2.97713	1.446	2.18599	2.81476	1.16786	2.50133	2.89795	1.4609	1.49352	1.66238	1.74867	2.12777	1.56609	0	1.00549
0610005C13Rik	0.0136372	20.7673	21.3347	19.3132	29.3194	50.8333	40.6424	62.8029	71.2083	85.8501	61.0394	74.1948	76.8	189.437	87.4096	87.1012
0610007N19Rik	0.136001	1.99538	1.69651	2.48002	1.82431	1.65044	1.36157	1.95124	3.26548	3.43987	2.30642	2.68528	3.65962	1.80153	0	0
0610008F07Rik	0.00510752	0	0	0	0	0	0	0	0	0	0	0	0	1.8091	1.291	1.72282
0610009B22Rik	0.00162307	12.9008	10.6813	11.902	9.67555	8.80691	11.8781	9.3812	13.7325	12.6468	13.5066	18.4825	15.2207	20.5811	19.3387	19.9597
0610009E02Rik	0.100963	2.17759	1.31109	1.4412	1.53375	1.67072	1.61016	1.85071	1.9624	1.59329	2.22816	1.01795	2.44293	0	0	0
0610009L18Rik	0.031458	1.3583	0	0	1.05471	1.06178	0	0	2.71111	1.628	1.1703	2.24245	1.32768	1.40765	0	0
0610010F05Rik	0.244837	3.66525	1.35933	3.06744	2.93828	1.10327	1.36407	2.03999	1.99094	1.67457	1.3701	1.69413	1.64578	1.89918	0	1.28338
0610010K14Rik	0.00885078	47.695	53.1295	37.6743	30.3743	32.1525	26.0456	20.1481	20.4354	18.4875	14.9268	16.3689	11.501	17.1538	15.6854	12.5898
0610012G03Rik	0.901941	95.3324	123.871	85.1533	82.3361	91.2339	84.9011	89.0796	92.3483	84.7956	81.5135	93.5134	86.5632	109.345	114.256	55.6554
0610030E20Rik	0.71705	7.07095	5.78967	7.69952	7.52818	6.30561	6.87327	6.01278	7.47283	7.15009	7.24457	6.22974	7.8493	7.2902	5.41533	5.42813
0610040B10Rik	0.0650005	0	0	0	0	0	0	1.04574	1.26478	1.06477	0	1.74192	1.62397	1.42049	1.25169	0
0610040J01Rik	0.00393999	6.10735	7.84258	7.74563	10.0911	13.887	11.5391	10.5641	15.5697	16.2306	18.9919	19.6843	18.7833	17.7354	15.0944	11.6016
1110002L01Rik	0.00176076	5.5033	4.17386	4.49501	3.69207	3.02562	3.11102	2.46457	1.27745	1.43108	1.34395	1.46457	1.73254	1.21415	0	1.29766
1110004F10Rik	0.0155671	72.7967	70.2787	64.1351	57.0834	45.879	40.5816	30.7944	38.5731	34.197	31.4474	35.4521	29.462	30.6709	27.1988	24.3433
1110006G14Rik	0.098522	0	0	0	0	0	0	0	0	0	0	0	0	0	2.30692	1.07603
1110008P14Rik	0.307073	24.4591	32.264	26.6871	18.9882	17.2532	15.4395	14.4767	16.92	16.1738	11.8673	15.8753	8.38122	20.2822	42.471	34.9345
1110012L19Rik	0.0101317	6.21832	5.02276	5.09712	4.44992	4.35349	4.22882	3.9983	5.19562	3.30927	5.49538	4.73593	6.81048	8.71523	6.49694	6.21163
1110019D14Rik	0.640453	1.10311	0	0	0	0	0	0	0	0	0	0	0	0	0	0
1110020A21Rik	0.631807	1.15553	0	1.08968	1.2995	0	0	0	0	1.03192	0	0	0	1.84016	1.20003	0
1110028F11Rik	0.789085	2.97417	4.01232	2.15031	1.51972	1.57104	1.5855	1.20603	1.52515	3.38929	2.12783	2.13173	2.91887	2.87006	1.26928	0
1110032A03Rik	0.0082658	3.49792	2.5981	4.77205	4.91906	2.69825	6.06175	4.74737	9.7852	5.90429	5.32853	6.2721	6.28541	8.81596	8.81984	9.29843
1110032F04Rik	0.369985	1.51458	1.3608	0	0	0	0	0	0	0	0	0	0	0	0	0
1110038B12Rik	0.013277	61.832	45.248	50.1431	38.2458	25.526	26.844	26.8086	31.0154	19.135	10.8161	14.8696	20.9628	11.2349	8.65519	10.6144
1110038F14Rik	0.0071198	26.1568	26.4239	21.3638	17.5506	15.6529	13.2345	15.6137	13.2878	12.4852	11.696	11.4193	9.28458	11.2175	6.96529	6.85471
1110051M20Rik	0.57298	8.65061	11.745	7.31102	12.4221	11.6459	8.27463	8.80985	9.8329	16.6163	8.98812	9.27176	8.11268	9.94337	10.6326	8.33809
1110054M08Rik	0.00170564	0	1.01466	0	1.07148	0	1.35024	1.72836	3.34638	3.34986	2.60726	4.2904	6.15749	5.51745	4.84964	2.11885
1110059E24Rik	0.152555	6.99294	3.27338	6.0373	5.66377	3.11698	2.93931	3.03026	5.49329	7.39778	7.19952	6.42625	9.45845	6.02675	4.40952	5.32791
1110059G10Rik	0.0641951	4.72048	3.24637	4.70651	4.17721	2.48269	3.41691	2.80312	2.90621	3.55822	3.01926	2.17744	2.67126	2.73504	1.69972	2.14755
1110065P20Rik	0.0013757	15.3827	15.0317	10.3123	10.5626	9.75306	8.17186	9.63136	17.0333	17.4196	19.5752	17.5645	20.3015	17.8931	23.5324	18.7749
1190005I06Rik	0.000164505	1.08743	1.1359	0	1.00261	1.22698	1.4525	1.0626	2.55637	4.21112	3.56923	3.6962	9.47078	5.43574	7.96845	5.94635
1190007I07Rik	0.159392	15.495	17.2017	12.3563	9.27197	9.60035	10.0034	9.8944	9.78753	9.45137	9.99281	9.53502	9.15275	9.31753	10.2257	5.97782
1200007C13Rik	0.332575	0	0	0	0	0	0	0	0	0	0	0	0	0	0	2.14141
1300002E11Rik	0.0160581	11.9498	7.73847	11.5861	9.39186	5.22366	8.09105	7.28648	6.66023	4.59336	3.84225	5.23689	6.45594	4.77604	2.56467	3.31776
1300015D01Rik	0.332548	0	0	0	0	0	0	0	0	0	0	0	0	0	0	1.77086
1300017J02Rik	0.000902082	24.5814	29.752	25.5588	52.1914	44.9727	80.3874	115.602	112.101	138.628	187.002	175.976	193.187	188.315	293.831	191.387
1500002C15Rik	0.255777	1.96559	1.74239	1.91065	1.50409	1.20226	1.41809	1.74506	2.36937	2.28655	1.82068	1.67053	1.24128	2.21398	1.99955	2.23582
1500009L16Rik	0.639908	1.35571	0	0	0	0	0	0	0	0	0	0	0	0	0	0
1500011B03Rik	0.0472199	7.14036	7.55116	6.28751	4.84448	3.80138	5.10622	5.37349	9.32108	4.22269	2.91492	2.92255	3.09526	3.25048	0	1.17612
1500011K16Rik	0.135424	23.7758	24.03	17.4661	14.0582	12.3034	12.9551	12.7416	10.1477	14.0296	10.2816	13.5647	16.1167	21.6654	23.8282	15.2943
1500012F01Rik	0.0094865	80.188	42.6169	68.0923	47.7286	30.6355	36.8892	34.2892	44.6615	19.1429	9.96905	13.2373	10.8112	10.6554	5.57309	6.03811
1500017E21Rik	0.0765791	0	0	0	0	0	0	0	0	0	0	0	0	0	2.0496	3.27616
1600002K03Rik	0.0686026	10.443	11.3658	8.32057	8.09835	5.71663	5.91905	4.13948	4.26549	3.757	2.97643	5.12229	4.18421	6.05493	7.6736	6.1122
1600012H06Rik	0.138864	5.78384	3.76658	5.53557	4.88332	4.66451	6.06185	5.26225	6.49238	5.76295	6.99959	7.03654	8.17042	5.53394	4.76619	5.34251
1600014C10Rik	0.0168608	2.64078	5.99549	4.87409	6.63086	17.1395	20.5859	52.9445	32.3688	51.0913	53.3607	63.0315	81.3832	34.7995	58.9862	38.8898
1600020E01Rik	0.159637	5.42788	3.1395	5.24846	4.83164	4.26975	5.62703	5.82791	5.6173	5.23536	4.10081	4.73769	6.00821	2.86083	2.0148	2.54207
1700001C19Rik	0.00119066	0	0	0	1.03066	2.07301	1.94072	2.19421	3.79913	4.09006	5.35153	5.32232	4.46545	6.91092	5.15467	3.39917
1700001G17Rik	0.370243	1.2058	1.17721	0	0	0	0	0	0	0	0	0	0	0	0	0
1700001L05Rik	0.332494	0	0	0	0	0	0	0	0	0	0	0	0	1.11844	0	0
1700003F12Rik	0.156847	0	0	1.77508	1.29198	3.31787	3.47211	4.73033	2.8749	1.36963	0	0	0	0	0	0
1700006J14Rik	0.100652	4.53793	3.74188	2.70031	1.81802	0	0	0	0	0	0	0	0	0	0	0
1700007L15Rik	0.21701	2.27025	3.07059	2.30419	1.96702	1.74948	0	1.90111	3.57418	3.14243	2.81265	2.12605	2.89651	2.42276	1.5341	1.64299
1700011J10Rik	0.000132375	7.62979	7.66845	7.48802	7.91482	6.28111	6.07689	5.69616	4.98443	3.59801	2.90252	2.61513	1.83684	2.05412	0	1.0389
1700012B15Rik	0.000915457	5.58848	6.93189	4.1213	7.05567	4.53363	5.41111	3.94295	1.36836	1.47526	2.35389	2.04504	1.5665	1.89612	1.77445	2.8749
1700012L04Rik	0.0800508	1.43508	1.52848	1.04473	1.89672	0	0	0	0	0	0	0	0	0	0	0
1700016P03Rik	0.131186	1.84684	0	0	1.09646	1.24209	1.03073	1.03738	0	0	0	0	0	0	1.0522	1.29991
1700017B05Rik	0.000549467	13.8557	16.7511	11.8046	11.7324	14.8422	11.0905	9.69776	8.57714	7.57279	5.43403	4.87334	4.26508	2.09735	3.84229	4.8118
1700019D03Rik	0.0049127	1.91352	1.02259	2.17201	3.25608	1.91847	4.77986	4.34616	0	0	1.13069	0	0	0	0	0
1700019G06Rik	0.682477	1.13999	1.03539	0	0	0	0	0	1.14637	0	1.15723	0	1.5465	1.04635	0	0
1700020I14Rik	0.0147924	15.7611	9.17578	20.6112	19.8824	10.6769	18.2465	12.5313	13.3633	11.3195	11.4976	8.90156	9.85655	6.76937	2.96462	4.32855
1700020L24Rik	0.0872732	0	1.29893	1.78065	2.20605	4.44621	2.50498	3.17816	3.14843	0	2.4302	0	0	0	0	0
1700021F05Rik	0.849829	14.4864	16.565	16.7474	10.3488	10.2348	10.0277	8.92403	12.6342	10.1415	10.4797	13.382	14.1189	13.7486	12.6084	10.3427
1700021J08Rik	0.451629	0	0	0	1.63675	0	0	1.18922	1.37444	1.09282	1.72212	0	0	2.40835	0	1.70189
1700023L04Rik	0.639048	0	0	0	0	1.06715	0	0	0	0	0	0	0	0	0	0
1700024N20Rik	0.066866	0	0	0	0	0	0	0	0	0	0	0	0	2.03862	1.57996	0
1700025G04Rik	6.15083e-10	0	0	0	0	0	0	0	1.14686	1.12208	1.26494	1.33808	0	0	0	0
1700028J19Rik	0.645624	1.31668	0	0	0	0	0	0	0	0	0	0	0	0	0	0
1700029I15Rik	0.449593	0	0	0	0	0	1.02736	1.31913	2.23468	0	0	1.57972	0	0	0	1.22764
1700030C10Rik	0.630091	0	1.1432	0	0	0	0	0	0	0	0	0	0	0	0	0
1700030K09Rik	0.0223475	4.83077	3.35572	3.89806	2.93413	3.47923	2.81609	2.1725	1.81675	2.54674	2.29291	1.71719	2.58582	2.09827	1.92682	1.36662
1700034P13Rik	0.00491088	2.02456	1.61133	2.91537	1.88131	1.70015	1.18849	0	0	0	0	0	0	0	0	0
1700037H04Rik	0.000163277	89.9335	117.01	97.2387	88.9181	107.58	73.4039	48.9599	24.2774	19.7321	8.38546	7.87434	2.41725	1.77179	3.5836	3.02522
1700047I17Rik2	0.00230354	10.7886	10.428	11.2273	6.98731	6.71703	6.0983	5.48352	5.61732	4.47743	3.54347	4.31231	3.10199	2.18834	0	0
1700048O20Rik	0.00162836	1.27045	1.21901	1.03816	1.25683	1.5861	2.591	1.73677	2.44189	1.55858	1.22862	1.78522	0	0	0	0
1700056E22Rik	0.0331587	0	1.11245	1.17352	0	0	0	0	2.1386	1.20585	1.53564	1.96762	2.56262	1.36518	1.33631	0
1700058P15Rik	0.0012905	2.90043	1.89716	1.65703	2.09606	1.50224	1.70339	2.76592	0	0	0	1.08111	1.04611	0	0	0
1700063H04Rik	0.00152513	4.77398	3.84532	5.42312	4.61341	4.23118	2.40102	1.50179	2.05067	0	0	0	0	0	0	0
1700066M21Rik	0.0377939	2.93856	1.89396	3.19309	3.01364	1.55375	1.93376	2.32777	2.34829	3.1833	3.61067	3.99177	3.4874	4.76227	2.81483	5.59014
1700067K01Rik	0.328002	0	0	0	0	0	0	0	0	0	0	0	0	1.55597	0	0
1700086O06Rik	0.00208341	4.77985	5.53996	7.5431	6.0389	5.54823	4.29298	3.36536	4.35333	2.55495	1.82372	2.23026	2.13244	1.5554	0	0
1700088E04Rik	0.332466	0	0	0	0	0	0	0	0	0	0	0	0	0	0	1.03536
1700092M07Rik	0.0690785	1.33397	1.13038	1.0902	1.09671	0	0	0	0	0	0	0	0	0	0	0
1700094D03Rik	0.0988944	1.63576	0	1.43711	1.20532	0	1.4908	1.30218	0	0	0	0	1.39196	0	0	1.02623
1700109H08Rik	0.370426	0	0	1.03136	1.1839	0	0	0	0	0	0	0	0	0	0	0
1700113A16Rik	0.685401	2.5025	2.75507	1.33164	1.07242	1.71116	0	1.25995	1.89036	0	1.38586	1.26634	1.32459	2.29476	1.68538	1.21199
1700121F15Rik	0.327976	0	0	0	0	0	0	0	0	0	0	0	1.45498	0	0	0
1700123O20Rik	0.0085808	19.008	21.0169	18.7571	15.8172	15.5542	17.7535	13.1493	12.95	14.7349	11.9411	12.6949	12.4927	12.6081	12.791	11.9217
1810009A15Rik	0.034692	97.6245	99.3333	76.4759	55.0306	43.0571	35.0838	30.0861	25.1627	31.1636	23.2765	25.6158	18.1521	27.3223	28.1731	29.3401
1810010H24Rik	0.330039	0	1.9391	2.40559	4.75305	16.5399	21.0126	19.5442	6.10827	3.17362	3.22643	2.67522	5.46092	5.37874	1.16599	1.22766
1810012K08Rik	0.365777	1.03703	1.57821	2.33139	1.63236	1.01313	0	0	2.98136	1.60441	1.45143	1.26318	0	1.22746	1.40401	1.52853
1810013L24Rik	0.000547598	12.4699	8.71004	11.7504	11.1404	8.83837	9.64672	7.01161	4.20663	4.39426	4.34143	4.6123	3.9894	4.89927	2.60173	4.56217
1810014B01Rik	0.770895	9.77095	4.46999	7.77977	7.23322	4.12391	6.97067	5.74252	5.8666	6.81128	6.73523	6.55691	4.80049	6.92146	3.54137	7.88852
1810019D21Rik	0.0198862	1.92581	2.20798	2.98555	6.13288	6.93039	9.48491	14.0325	14.9396	16.2898	15.5793	16.7944	14.1025	25.6708	8.36182	14.1174
1810021B22Rik	0.00235525	0	0	0	0	0	1.15325	0	1.06948	0	0	1.14135	1.24229	2.15915	3.30566	3.21451
1810030O07Rik	0.00168373	8.35144	7.46097	8.26999	7.24187	5.6083	5.57329	4.64549	4.07712	4.71597	4.16322	3.55332	3.76838	2.41304	1.83517	1.94992
1810032O08Rik	0.00199046	12.5937	12.2855	13.3385	9.45858	8.09171	8.03151	7.10338	8.32728	5.64749	2.34042	3.96921	3.3149	2.02507	1.13624	1.81286
1810034E14Rik	0.0139745	1.11344	1.66907	1.87027	1.50611	1.42024	1.58503	1.56641	1.05357	1.85876	1.92785	2.09361	2.16681	4.26105	4.1076	2.10851
1810037I17Rik	0.000436691	107.08	84.9429	90.4436	85.0252	63.8467	87.8871	55.3112	42.0606	45.5892	30.8005	34.1091	26.4507	25.7918	19.2422	19.9987
1810046K07Rik	0.239989	0	0	0	0	0	0	0	0	0	1.38271	2.11106	0	5.11192	1.30227	0
1810049J17Rik	0.0321768	21.9213	25.3036	24.1264	14.8766	16.3967	11.6048	9.7723	10.4985	12.2848	11.8702	7.12288	6.46915	6.79284	10.0238	11.1194
1810055G02Rik	0.0719096	10.0303	10.8383	8.41929	9.22087	13.662	16.382	16.0433	38.9448	21.2726	30.3594	33.8032	57.4981	30.2953	10.146	12.5675
1810058I24Rik	0.165455	48.5134	64.3471	58.5737	50.4235	61.6242	49.8193	38.4891	36.7109	45.9758	49.0647	61.7036	59.9171	32.4964	27.1205	29.6916
1810058N05Rik	0.00446333	1.54847	1.05188	1.18735	2.33289	2.82753	2.76893	1.34	0	1.10439	1.10965	0	0	0	0	0
1810059H22Rik	0.140378	1.46429	1.19219	0	2.47924	1.43751	2.48305	2.66281	2.3908	2.23917	3.05536	3.22971	3.03695	2.00522	4.09186	1.96859
1810062G17Rik	0.445746	0	0	0	0	0	0	1.23638	0	1.0851	0	0	1.84901	1.01602	0	0
1810064F22Rik	0.332439	0	0	0	0	0	0	0	0	0	0	0	0	0	0	1.02031
2010001A14Rik	0.00957323	2.57206	1.68415	1.14753	0	1.21064	0	2.21793	3.52217	4.42231	3.38129	3.54186	3.87551	6.8505	3.58702	2.47206
2010001M06Rik	0.772339	1.96433	1.65973	1.37295	1.37921	0	1.05267	1.00306	2.03107	0	1.32394	0	1.10621	1.30213	0	1.77458
2010003K11Rik	0.0139269	0	0	0	0	0	0	0	6.30264	4.85506	5.63441	8.45998	30.9168	6.45934	6.83825	14.83
2010003O02Rik	0.33008	4.62323	4.05107	4.79671	2.97176	2.90126	4.06225	3.28086	5.48529	4.87865	3.15284	4.0013	3.57853	6.97764	5.07732	4.12481
2010012P19Rik	0.332412	0	0	0	0	0	0	0	0	1.09573	0	0	0	0	0	0
2010109A12Rik	0.632827	0	0	0	1.11693	0	0	0	0	0	0	0	0	0	0	0
2010110K18Rik	0.00325854	1.56734	1.12075	2.19051	1.92896	1.32625	1.70406	0	0	0	0	0	0	0	0	0
2010204K13Rik	0.00817099	14.6279	13.8098	10.5092	6.83207	5.00148	5.44126	6.56235	4.81454	4.32052	3.09524	3.23044	2.69293	1.23657	0	0
2010315B03Rik	0.0291565	0	0	0	0	0	0	0	0	0	1.13327	1.10473	1.49767	1.61234	0	1.15447
2200002D01Rik	0.0597654	5.01955	5.9645	4.18313	4.15632	4.80053	5.17058	4.82504	2.73262	3.69909	4.09002	4.46945	3.60341	6.48936	19.1741	12.983
2210011C24Rik	0.327949	0	0	0	0	0	0	0	0	0	0	0	0	1.259	0	0
2210013O21Rik	0.0370441	7.98806	7.11004	7.98081	8.41409	6.75908	7.02865	7.04062	9.00117	6.98064	7.4656	7.18459	7.51046	6.33181	1.85665	1.92767
2210015D19Rik	0.362009	2.95855	1.92863	2.63147	2.60309	1.6328	2.17056	2.3255	2.58027	2.38336	3.33434	2.46954	2.68428	3.73066	2.25213	2.488
2210016F16Rik	0.340646	15.7687	17.1371	13.0899	11.8922	10.6496	9.55548	9.61858	9.99266	10.5919	9.55662	11.0718	12.0294	12.4435	16.5421	10.7863
2210016L21Rik	0.084702	10.645	10.1273	7.60599	8.24191	7.72535	7.11942	7.43989	6.68112	5.83026	6.48146	7.48233	8.32247	7.15334	5.86143	4.827
2210408F21Rik	0.0658335	0	0	0	0	0	0	0	0	0	0	0	2.2938	2.84765	0	0
2210417A02Rik	0.0232948	0	0	0	0	0	0	0	0	1.07604	1.92348	1.59703	1.09	0	0	0
2210417K05Rik	0.00195764	1.18335	1.67295	1.39859	1.43716	1.38051	1.23535	0	0	0	0	0	0	0	0	0
2210418O10Rik	0.370112	1.62009	0	1.18172	1.20103	0	0	0	0	0	0	0	1.00886	1.36965	0	0
2300009A05Rik	0.00347439	9.40148	12.171	8.09422	8.08931	7.56279	7.17847	7.44827	14.8319	12.8943	11.258	14.3829	16.0978	21.8906	18.5003	11.6782
2310001H17Rik	0.00598746	0	0	0	0	0	2.13771	1.70627	1.55729	1.84101	1.80628	2.70844	3.02983	5.24035	10.4872	4.61397
2310009B15Rik	0.554192	12.3951	14.478	10.3319	8.61602	8.4979	7.39457	7.26273	14.0173	8.11694	7.60215	7.12467	8.76404	9.36993	8.38223	4.67565
2310010G23Rik	0.327923	0	0	0	0	0	0	0	1.27012	0	0	0	0	0	0	0
2310010J17Rik	0.0998286	2.41311	2.45947	1.68871	2.95001	1.85928	2.81779	1.95704	4.79491	2.96142	3.38407	2.47099	2.79047	3.94334	3.05987	2.30348
2310011J03Rik	0.00718143	27.3461	35.586	25.9391	22.0049	25.5512	16.9178	15.8235	17.7588	12.0125	11.898	10.3207	11.4324	11.3823	12.7471	7.6134
2310015A10Rik	0.615479	0	0	0	0	0	0	1.2056	1.54854	0	0	0	0	0	0	0
2310022A10Rik	0.00284406	15.3929	18.641	12.1884	12.3694	12.1233	7.31219	5.92884	4.81076	4.60871	3.43932	3.69263	2.71272	2.07148	2.14899	2.28621
2310022B05Rik	0.000719223	11.7114	15.7778	11.4627	11.628	13.2645	10.6524	8.32466	8.16924	10.1073	8.12195	7.59664	4.9938	3.20411	3.95782	3.4061
2310026L22Rik	0.974422	1.11457	0	0	0	0	1.58342	0	1.96354	0	0	0	1.51443	0	0	0
2310030G06Rik	0.00101865	1.03924	0	1.11602	1.8504	2.12652	3.14728	4.95136	4.09145	4.21497	5.12588	4.82125	7.89241	5.92396	7.76714	8.99112
2310031A07Rik	0.00907297	3.07591	1.50644	3.47264	3.79173	2.909	2.88767	2.4448	1.95781	1.86905	1.46302	1.87261	1.87528	0	0	1.57774
2310033P09Rik	0.00704741	29.306	34.1733	27.654	21.6562	18.9917	17.1294	16.0663	15.4244	12.3065	9.91711	11.7524	9.17128	10.7217	12.1597	10.4831
2310039H08Rik	0.0316199	25.2224	35.0822	25.8621	29.261	38.5274	44.1019	58.0283	102.152	60.1146	53.536	66.4178	72.8769	86.6182	68.8491	33.8639
2310057M21Rik	0.00219956	6.27398	5.02985	4.93686	4.17239	2.76357	3.21227	1.80921	2.52051	2.11778	1.61397	1.04131	0	0	0	0
2310061I04Rik	0.766079	16.2007	19.598	16.4556	12.4097	12.4395	7.61937	9.87348	15.3449	8.43803	9.75149	12.3209	7.57831	12.8218	20.2017	11.0227
2410002F23Rik	0.00457384	25.079	21.2287	12.9366	15.7247	11.3627	11.8067	11.929	10.3444	7.12866	6.21609	8.13184	6.24598	3.35511	2.19671	2.1231
2410004B18Rik	0.0109697	11.5133	11.6096	10.8278	8.92085	7.01832	5.77125	5.76653	5.53515	6.57758	4.62033	4.45654	4.73675	3.98959	3.3804	3.63071
2410004N09Rik	0.0734333	42.3266	35.5993	35.3985	24.7282	20.1546	23.2694	27.711	39.4188	16.6407	16.1079	13.9757	20.0541	21.0058	7.58125	6.47177
2410006H16Rik	0.0209465	91.1112	67.9572	70.1426	58.981	48.7228	52.8204	51.2042	73.0193	40.5135	31.2669	29.1216	45.2657	25.6292	16.7929	9.45466
2410019O14Rik	0.374945	1.34979	0	1.03516	0	0	0	0	0	0	0	0	0	0	0	0
2410131K14Rik	0.137234	1.51933	1.56598	1.3723	0	1.10469	1.23952	1.21807	1.22165	0	0	0	0	0	1.22086	1.09261
2410133F24Rik	0.309813	0	0	1.33469	0	0	0	0	0	0	0	0	0	1.35619	1.10113	0
2500002B13Rik	0.00235119	1.15025	0	1.69161	1.63061	1.36292	1.85149	1.37125	0	0	0	0	0	0	0	0
2500004C02Rik	0.00603254	5.61213	2.80152	4.15916	3.65407	2.43797	2.89166	1.58205	2.58805	1.50677	1.59811	2.43488	1.12194	0	0	0
2510002D24Rik	0.0122609	10.597	7.68235	10.0059	9.41536	6.1304	9.9558	8.86153	7.00124	6.14507	5.57434	5.27362	8.80062	9.34366	8.76237	8.31153
2510003D18Rik	0.0015664	13.0333	8.78902	13.8356	11.7007	7.03864	8.8169	5.29978	6.52867	3.10875	0	0	0	0	0	0
2510009E07Rik	0.0528073	1.54081	1.32166	1.91551	1.67401	1.54206	1.63956	1.44169	1.71044	2.34296	2.99096	2.38499	2.24644	1.5893	0	0
2510039O18Rik	0.00867411	24.7787	31.6318	22.6448	21.5939	25.1097	18.3681	18.7114	18.7983	16.7868	15.8585	13.2067	13.8407	11.7291	17.0802	13.4802
2510046G10Rik	0.083305	2.05426	2.06038	1.55519	2.81235	2.67862	1.5724	2.06535	4.9746	2.95234	2.43352	3.44093	3.48341	2.12563	0	0
2600006K01Rik	0.000758128	6.07573	8.37574	7.78961	6.75219	6.77107	4.31302	2.70636	2.09149	2.13738	0	0	0	0	0	0
2610001J05Rik	0.130352	6.10749	4.95462	5.10719	4.88293	4.85931	3.67603	3.32865	3.38003	3.56387	3.39851	3.17413	4.7743	5.18207	3.09669	2.88503
2610002M06Rik	0.00690655	5.15175	3.85324	4.43136	3.99722	2.83844	3.39291	2.37887	2.13548	2.29162	2.34141	2.27153	2.31795	2.02378	1.37174	1.69734
2610005L07Rik	0.640316	1.19888	0	0	0	0	0	0	0	0	0	0	0	0	0	0
2610008E11Rik	0.77898	1.74985	0	1.12171	1.52696	0	1.45124	1.78085	1.15756	1.21931	1.37911	1.5747	1.88463	1.82884	0	0
2610019E17Rik	0.00567293	11.7877	7.4685	14.2383	8.16575	5.51154	8.7815	8.1397	6.08464	3.30742	3.33958	2.67864	2.69834	5.07421	1.92923	1.77962
2610020C07Rik	0.184015	1.52097	0	1.33283	1.35138	0	0	0	0	0	0	0	0	0	0	0
2610021A01Rik	0.115336	2.42531	0	2.1642	1.7798	0	1.31293	0	1.21024	1.05348	1.06107	1.44411	0	0	0	0
2610027K06Rik	0.00858367	1.53063	2.0259	3.30802	1.81944	1.46595	1.21295	0	0	0	0	0	0	0	0	0
2610035D17Rik	0.631853	1.0034	0	0	0	0	0	0	0	0	0	0	0	0	0	0
2610044O15Rik8	0.417781	1.96688	0	2.45702	1.69995	1.75653	1.89658	1.48538	3.12669	2.44227	1.84736	1.3097	1.26984	2.42629	1.00059	1.116
2610203C20Rik	0.634872	1.75002	0	0	0	0	0	0	0	0	0	0	0	0	0	0
2610301B20Rik	0.00607777	4.93724	2.85183	4.16769	4.35515	2.90239	3.38852	2.85953	2.21445	2.17805	2.41013	1.8267	2.12711	1.55215	0	1.95522
2610318N02Rik	0.00611541	21.9357	24.26	15.1062	13.7064	11.3664	6.34989	4.20332	3.49829	2.23461	0	0	0	0	0	0
2610507B11Rik	0.182071	26.9324	28.8996	22.2677	19.9401	19.1421	14.073	13.365	14.9637	17.6185	17.0809	15.677	13.5137	17.8638	16.3832	12.9984
2610507I01Rik	0.0729572	3.51191	2.97817	3.58329	4.76782	2.61003	4.48078	3.94642	4.43315	5.05928	5.49248	3.98125	3.90295	3.61606	2.41305	3.57102
2610524H06Rik	0.00278264	9.57911	8.82833	8.80138	7.95926	5.29425	4.90251	3.84752	4.56111	5.36768	3.51262	4.14175	2.21673	1.59463	0	0
2610528J11Rik	0.0216819	2.925	4.51865	4.01193	4.34431	6.15677	5.03045	5.43829	6.19667	11.063	13.6849	13.7103	14.0978	13.4796	16.2714	3.04975
2700012I20Rik	0.640271	1.21815	0	0	0	0	0	0	0	0	0	0	0	0	0	0
2700016F22Rik	0.165703	2.55541	3.29618	3.20687	3.37522	3.19881	2.223	2.66128	4.1942	2.48297	1.62946	2.95187	2.30261	2.33116	1.48155	2.02478
2700033N17Rik	0.070815	0	0	0	0	0	0	0	1.95615	1.03528	1.15068	0	1.64351	0	0	0
2700038G22Rik	0.00334465	6.39749	5.71771	6.49321	3.53108	2.0374	2.66878	2.39993	1.58453	0	0	0	0	0	0	0
2700046G09Rik	0.0297817	0	0	0	0	0	0	1.17228	1.74951	1.5675	1.24686	1.55069	2.11229	0	0	0
2700049A03Rik	0.00450099	4.1559	3.09412	3.65526	2.46225	1.60046	2.52564	1.75946	0	1.85979	0	1.40252	1.01402	0	0	0
2700062C07Rik	0.792184	8.85035	7.72795	6.46506	6.24755	4.47998	3.96902	4.36794	6.39483	6.48485	5.01939	5.20817	4.14921	5.47172	6.3572	5.48837
2700073G19Rik	0.00233533	5.0013	3.98718	2.66491	3.19033	2.91766	3.95612	3.38239	2.98704	1.62184	0	1.50003	1.19511	0	1.02178	0
2700081O15Rik	0.00613214	14.4343	13.8538	8.93565	8.09991	6.03372	5.8208	5.46249	3.79181	4.76963	4.03883	3.47233	2.57385	1.43696	0	0
2700097O09Rik	0.0059544	6.92867	3.89085	6.70195	6.0466	5.89271	4.87847	3.33232	2.33833	3.5456	3.00795	3.92541	2.49172	3.10006	0	1.44144
2700099C18Rik	0.12943	1.89322	0	3.87084	3.5839	1.64117	2.37173	2.07923	2.95058	1.29139	0	1.07183	1.68811	0	0	0
2810001G20Rik	0.0835512	5.5876	5.80674	4.29007	4.22835	2.87164	3.32341	3.95334	5.44148	2.59904	2.48455	2.63907	3.43375	2.94033	1.51982	1.21827
2810002D19Rik	0.379437	1.6101	0	1.14306	0	0	0	0	0	0	0	0	0	0	0	0
2810004N23Rik	0.0283539	41.4713	48.1267	33.0243	24.5771	24.1296	20.6994	16.8131	13.1943	16.9774	13.5363	14.6921	11.0509	15.6708	18.0468	13.636
2810006K23Rik	0.13674	5.96204	5.13734	4.79643	4.40449	4.01081	3.47931	2.68767	3.2317	3.29592	3.71186	3.68064	3.29049	3.18203	3.69874	2.9389
2810008D09Rik	0.135154	21.4153	22.3491	22.65	20.421	8.99303	29.4843	27.9928	33.5467	12.1614	14.1837	15.4725	17.1043	13.5537	5.11437	7.59003
2810021J22Rik	0.19179	1.55042	0	1.70542	1.18591	0	0	0	0	0	0	0	0	0	0	0
2810025M15Rik	0.0346674	23.9824	22.4802	14.8997	11.9046	10.397	8.84242	12.2097	9.21698	10.6275	10.0259	10.7013	8.56392	6.3015	5.30524	2.76269
2810408A11Rik	0.333615	0	0	0	0	0	0	0	1.06097	0	0	0	0	0	0	0
2810408I11Rik	0.28667	9.15414	7.24755	11.6275	7.32534	4.22691	4.62124	2.36583	3.88312	4.24946	4.25987	6.97751	1.54814	7.61314	2.41822	2.8921
2810410L24Rik	0.422551	0	0	0	0	0	0	1.05157	1.98245	0	0	1.25352	1.77119	0	0	0
2810425M01Rik	0.106685	6.1816	5.71756	4.14371	4.40799	3.5248	3.05226	3.18288	3.44618	2.29471	2.20695	2.32826	2.29139	3.17188	4.69404	4.56066
2810442I21Rik	0.0295753	2.12388	1.48412	3.80209	2.0882	0	1.55324	1.65136	1.11672	1.26496	0	0	0	0	0	0
2810459M11Rik	0.0210303	9.98458	17.7301	16.8599	19.877	24.6192	17.0555	14.4149	26.6931	24.6194	26.6366	24.4254	20.7203	16.7314	21.7877	15.0896
2900005J15Rik	0.0182136	0	0	0	0	0	1.06815	1.45302	2.66165	1.60957	2.67419	2.7678	3.2804	2.16245	0	1.02548
2900008C10Rik	0.0478392	0	0	0	0	0	0	0	0	1.01992	1.26846	1.7374	1.35532	1.3291	0	0
2900026A02Rik	0.000680699	2.18367	2.90359	2.06035	3.2732	5.24871	5.27169	3.86966	6.39891	6.56065	7.7896	7.57479	9.23343	6.9624	9.12404	10.4942
2900052L18Rik	0.000893638	0	0	0	0	0	0	0	2.63101	1.54593	2.06732	2.18865	1.32475	2.14401	0	1.07854
2900053O20Rik	0.632755	1.0727	0	0	0	0	0	0	0	0	0	0	0	1.2923	0	0
2900076A07Rik	0.0551936	3.69129	1.7872	4.70695	4.2285	2.65317	4.18102	5.89107	2.69123	2.81688	2.08974	3.02717	2.69121	1.59813	0	2.55758
2900097C17Rik	0.854206	28.3788	22.137	24.5758	22.3193	16.7148	19.1652	19.7693	23.2171	20.7225	21.4105	17.6427	34.4912	19.1686	11.0854	13.9485
3000002C10Rik	0.00517803	3.10206	3.01543	2.94406	2.49921	3.02316	4.34977	2.73259	2.92953	2.75397	3.4005	3.48717	1.6674	1.25572	2.18609	1.6671
3010003L21Rik	0.569774	1.44608	1.48644	0	0	0	0	0	1.0301	0	0	0	0	0	0	0
3110001I22Rik	0.72513	1.4993	1.02263	1.55268	1.00392	0	1.18247	1.02361	1.01099	0	1.75218	0	1.83426	0	0	1.21704
3110009E18Rik	0.00132924	3.26756	3.05643	2.56012	2.48784	1.63394	2.27538	1.3606	1.03497	1.61526	0	0	0	0	0	0
3110040N11Rik	0.847024	14.0352	9.60677	8.37962	6.24722	5.33838	6.66107	7.95344	6.51596	8.41041	6.40862	11.2263	6.03661	9.56144	7.58121	6.39088
3110045C21Rik	0.126679	0	0	0	0	0	1.02308	0	0	0	0	0	0	3.40279	0	1.93626
3110056K07Rik	0.0143197	2.31721	1.69853	3.07257	2.7274	1.69618	2.63094	2.49928	0	1.37456	1.39712	1.5123	1.25418	1.40918	0	1.55458
3110082I17Rik	0.0455529	21.117	18.4258	13.3993	10.8553	8.02788	5.7477	6.34323	6.65593	5.73613	5.52716	4.54438	3.10993	3.45456	6.32453	4.03227
3300005D01Rik	0.039194	2.86534	1.56666	1.74134	0	1.33542	1.04745	0	0	0	0	0	0	0	0	0
3830406C13Rik	0.870176	3.47184	2.14426	4.11566	4.42307	1.93659	2.82398	2.66802	2.47005	3.08158	4.23291	3.57307	3.50012	4.52769	2.05583	3.34308
3930402G23Rik	0.200127	0	0	0	0	1.68237	6.33059	17.9456	8.30304	10.3067	6.9896	6.53588	2.31525	0	0	1.13347
4430402I18Rik	0.295273	0	0	0	0	0	0	0	0	1.15048	0	1.46728	0	1.96851	0	0
4632415L05Rik	0.032424	3.22252	1.84255	2.15905	2.31514	2.29404	1.99277	2.23057	2.41368	2.0437	1.93937	3.05376	1.76034	1.78438	0	1.06524
4632419I22Rik	0.00166128	12.1761	12.8128	13.2284	12.6958	11.1291	8.4865	7.40025	5.02844	7.62135	6.47281	6.98906	5.44329	5.66938	3.93422	3.05967
4632427E13Rik	0.327896	0	0	0	0	0	0	0	1.24005	0	0	0	0	0	0	0
4632428C04Rik	0.492815	0	0	0	1.64372	1.19516	1.87208	2.38053	1.22791	1.78899	1.85793	1.43103	2.6571	0	0	0
4632433K11Rik	0.621622	0	0	1.00077	0	0	0	0	0	0	0	0	0	1.25478	0	0
4732419C18Rik	0.0652384	0	0	0	0	0	0	0	0	0	0	0	0	0	1.32439	1.60786
4732444A12Rik	0.00255668	0	0	0	0	0	0	0	0	0	1.56634	1.52714	2.38152	3.79864	2.27291	1.2517
4732463B04Rik	0.0881778	0	0	1.10896	1.18768	1.15086	1.0278	1.23517	2.53972	1.39916	1.92099	2.38733	2.69248	0	0	0
4732465J04Rik	0.0213471	0	0	0	0	0	0	0	0	0	0	0	0	1.20453	1.17787	2.94596
4732487G21Rik	0.862283	1.081	0	0	1.14757	0	1.0429	0	1.36974	0	0	1.03414	1.36491	0	0	0
4833417C18Rik	0.0677311	1.32161	1.40637	1.368	1.2115	0	0	0	0	0	0	0	0	0	0	0
4833418N02Rik	0.0486291	0	0	0	0	0	0	0	1.6523	1.0539	0	0	1.32186	1.52896	0	1.14305
4833420G17Rik	0.946835	10.7954	5.6432	8.78317	9.46305	6.0173	9.30805	7.76879	10.6427	6.49273	7.21527	6.66768	17.1555	8.88366	2.83249	5.56285
4833439L19Rik	0.752007	18.175	23.7954	18.0659	17.071	15.2169	12.1349	12.4325	18.927	18.5631	18.1639	16.8065	14.4358	14.9319	21.1515	15.2719
4921524J17Rik	0.0680242	9.6056	5.117	8.30928	7.83731	3.77491	5.57825	4.64468	4.70399	3.95456	4.54035	3.87283	3.68649	3.9953	1.80887	4.88884
4921530L18Rik	0.613799	0	0	1.12758	1.0964	0	0	0	0	0	0	0	1.23868	0	0	0
4921531C22Rik	0.982882	0	1.25667	1.25124	0	0	0	0	1.13541	0	0	0	0	0	1.35085	0
4930402H24Rik	0.259637	3.51332	5.61886	4.42254	6.22761	7.17348	6.41751	6.50703	3.60813	6.69515	7.73503	5.44861	5.03424	3.33186	5.0457	3.61157
4930403D09Rik	0.644289	1.01088	0	0	0	0	0	0	0	0	0	0	0	0	0	0
4930404I05Rik	0.0332241	2.73173	1.39774	3.64357	3.44216	1.66336	4.06629	2.85212	2.03786	1.62236	1.79675	1.79661	1.99439	1.24612	0	1.20621
4930404N11Rik	0.00160171	2.60469	3.79961	3.16996	2.20249	2.9855	3.44719	1.69276	2.39804	2.03828	0	1.19091	0	0	0	0
4930430F08Rik	0.00238496	5.26437	2.90124	5.81049	6.68335	3.34833	3.84251	2.13203	1.48669	1.46194	1.21923	1.12096	0	1.05282	0	0
4930438A08Rik	0.148293	0	0	0	0	1.74124	2.41305	1.58858	3.49846	1.82219	1.53097	0	0	0	0	0
4930452B06Rik	0.134047	1.12886	1.44019	1.37489	1.73673	2.21387	2.67078	3.63856	1.46533	2.42533	2.16922	2.37753	2.17632	1.26707	0	0
4930453N24Rik	0.945563	4.73389	3.32686	3.79312	3.56307	2.05828	2.63783	2.13941	3.15882	3.49548	2.58962	3.46596	2.8978	3.34956	2.63264	3.23448
4930455G09Rik	0.00912085	2.74155	2.60874	4.72837	5.50564	6.61178	8.07722	2.729	3.59069	3.25243	1.93139	0	0	0	0	0
4930470G03Rik	0.131596	0	0	0	0	0	1.133	1.80392	1.43276	1.23705	1.61643	1.47548	2.37893	1.06369	0	1.21618
4930474H06Rik	0.655738	1.128	0	0	0	0	0	0	0	0	0	1.15871	0	0	0	0
4930481A15Rik	0.00198474	2.08089	1.59353	2.49115	1.6975	2.57544	1.70183	1.74009	1.81596	1.52806	1.61925	1.64704	3.51564	4.18007	5.35394	2.81247
4930500M09Rik	0.548414	0	1.67131	1.82373	0	0	0	0	0	1.05181	0	0	0	0	0	0
4930503L19Rik	0.00884469	9.35762	4.76275	8.57855	6.96836	3.10472	4.17968	2.7277	2.16757	2.48365	1.81189	2.03679	1.50561	1.08056	0	0
4930506C21Rik	0.04119	0	0	0	0	0	0	1.44627	5.05496	1.21385	1.61322	6.99891	3.9414	1.12893	0	0
4930513N10Rik	0.631235	1.26547	0	0	0	0	0	0	0	0	0	0	0	0	0	0
4930516B21Rik	0.0138398	1.73933	1.16301	1.0623	1.28409	1.30197	1.83044	0	0	0	0	0	1.11661	0	0	0
4930522L14Rik	0.520742	1.13676	0	1.27948	1.07123	0	1.29473	0	1.07803	0	0	0	1.19637	0	0	0
4930523C07Rik	0.100924	4.90374	4.65388	8.17519	5.28717	5.81948	7.55136	5.49366	4.14381	3.67459	3.40271	2.12857	8.16151	2.73717	1.02116	1.18159
4930524J08Rik	0.00354065	5.01192	4.43352	4.72622	3.22318	3.41115	2.82498	1.40035	3.75526	2.17705	2.30618	2.66908	0	1.11269	0	0
4930534D22Rik	0.332385	0	0	0	0	0	0	0	0	0	0	0	0	0	2.0108	0
4930538E20Rik	0.630399	0	0	1.08804	0	0	0	0	0	0	0	0	0	0	0	0
4930539J05Rik	0.440402	1.02126	2.38808	1.00278	0	0	0	2.4746	0	0	3.25422	0	0	0	0	0
4930579G18Rik	0.196935	1.57916	1.01641	1.0276	1.55819	0	0	0	0	0	0	1.06059	0	0	0	0
4930579G24Rik	0.00297901	8.68593	6.08446	8.40644	6.16803	5.01682	4.53194	2.23845	2.93205	3.70069	2.63534	1.84858	1.2359	0	0	0
4930579K19Rik	0.181233	0	0	0	0	0	0	0	1.19786	0	0	1.18427	1.06074	0	0	0
4930581F22Rik	0.292914	4.15266	2.84497	5.38339	5.56	3.54066	3.54729	6.53127	4.90135	6.40083	8.50542	8.07779	17.5337	8.48451	2.48795	4.95729
4930594M22Rik	0.333588	0	0	0	0	0	0	0	0	1.10461	0	0	0	0	0	0
4931406C07Rik	0.000198304	5.99015	4.08002	6.19971	7.72918	5.46034	7.62393	9.62147	49.1142	27.6534	41.758	38.6425	72.4207	56.5332	45.2926	39.2953
4931406P16Rik	0.00050497	8.15954	7.09964	7.03949	6.2911	6.28245	5.59207	4.64432	4.20274	3.86528	3.96878	3.18129	3.0201	2.48617	1.30278	1.16862
4931414P19Rik	0.00699856	3.07815	3.64398	2.7473	2.43676	2.39995	1.9528	2.0858	1.53801	1.93308	1.85799	1.9951	1.572	1.30409	1.20415	0
4931428F04Rik	0.377618	1.48683	1.08663	0	0	0	0	0	0	0	0	0	0	0	0	0
4932438A13Rik	0.963678	2.65249	0	1.62001	3.56326	1.90669	1.17915	2.39686	1.79961	2.00096	1.70761	2.7769	3.94806	1.92694	0	2.44109
4933404O12Rik	0.193901	2.01611	2.54022	1.64282	1.42986	1.21212	0	0	1.11349	0	0	0	0	1.05682	1.03011	0
4933411K16Rik	0.332357	0	0	0	0	0	0	0	0	0	0	0	1.06789	0	0	0
4933421O10Rik	0.0463527	0	0	0	0	0	0	0	1.48302	1.15139	1.10704	0	1.38557	1.23109	0	0
4933427D14Rik	0.0291171	1.72439	1.24271	1.65872	1.14921	0	2.53628	1.1265	1.10966	0	1.06595	0	0	0	0	0
4933428G20Rik	0.00235092	1.06983	1.04304	1.40631	1.11608	1.27732	1.58148	0	0	0	0	0	0	0	0	0
4933431E20Rik	0.0202311	1.3841	2.12781	2.17314	2.67861	1.48193	1.30313	0	0	1.0953	1.21672	0	0	0	0	0
4933434E20Rik	0.0989327	12.0807	12.3113	8.82703	6.98715	10.4524	11.875	9.08863	8.81736	7.55312	8.5179	9.64541	9.29668	5.94775	8.77694	5.30917
4933436C20Rik	0.0258789	2.21216	1.15002	2.07616	1.27021	0	1.58145	0	0	0	0	0	0	0	0	0
4933439C10Rik	0.0563055	3.38386	1.80526	2.40157	2.77679	3.0086	4.18365	7.43622	8.21162	6.10346	5.56656	5.27881	4.93331	3.78714	0	0
4933440N22Rik	0.0662751	0	1.21384	0	0	0	0	0	2.37104	0	1.17603	1.77993	1.07987	0	0	0
5031425E22Rik	0.715186	2.9716	2.58809	3.52375	3.48382	3.28711	3.45655	4.12273	6.01979	3.05987	3.25517	3.42642	5.72424	4.4273	2.16579	2.58519
5031434O11Rik	0.33233	0	0	0	0	0	0	0	0	0	0	0	1.00323	0	0	0
5031439G07Rik	0.327181	3.22102	4.49725	3.26731	3.77087	5.23279	3.8504	3.22865	5.05	4.46147	4.76909	4.21399	4.72936	3.65181	4.70538	2.98822
5033430I15Rik	0.00293735	0	0	0	0	0	1.29739	0	1.25885	2.2371	1.70075	2.22603	1.17264	0	0	0
5330417C22Rik	0.00467661	0	0	0	0	0	0	0	0	1.15794	1.4073	1.10144	0	0	0	0
5330430P22Rik	0.149734	0	0	0	0	0	0	0	0	0	1.00484	0	0	1.34467	1.41541	0
5330438D12Rik	0.370047	1.10161	0	1.14479	0	0	0	0	0	0	0	0	0	0	0	0
5430405H02Rik	0.0152197	2.79998	2.14809	1.42265	1.68623	2.27073	2.223	1.99294	1.07763	1.26896	1.0128	1.65913	1.6881	1.23485	0	0
5430416N02Rik	0.0399249	8.21457	3.61197	7.36771	4.17802	2.28464	6.03668	5.63833	2.92052	3.25865	2.82868	2.82719	2.79651	3.54975	1.04452	2.09986
5430417L22Rik	0.00215207	9.45139	10.463	7.92729	7.40235	7.95296	6.09913	5.60764	6.9579	4.89769	3.77318	4.79709	3.33792	2.51055	2.97863	2.47103
5530601H04Rik	0.0798585	2.84668	0	2.37282	2.53606	0	1.76052	1.37076	1.51508	1.09922	0	0	0	0	0	0
5730409E04Rik	0.000132484	0	1.07807	0	0	0	0	0	1.84462	1.83718	2.49869	2.07565	2.33041	1.84728	2.47968	1.72704
5730420D15Rik	0.453181	0	0	0	0	0	0	0	2.6846	0	0	0	4.27454	0	0	0
5730435O14Rik	0.0684386	0	0	0	0	0	0	0	0	0	0	0	0	0	2.02216	1.49796
5730455P16Rik	0.976946	2.98471	1.51006	2.49699	1.99853	1.21005	1.3148	1.34499	2.07437	1.86861	1.95048	1.65204	2.03188	2.10485	1.20482	1.86739
5830417I10Rik	0.00399487	6.33906	5.49701	5.00723	4.35542	3.61621	2.63362	2.50248	2.03016	2.27842	2.44037	1.91313	1.10788	1.08316	1.15351	1.03801
5830428H23Rik	0.85931	1.2757	0	1.72896	2.2962	1.14973	5.53406	5.19929	2.53176	3.94864	3.30568	2.17234	2.94315	3.7488	1.07431	1.81086
6030458C11Rik	0.00154381	15.8386	12.0627	14.9384	14.1784	9.21354	9.37397	7.48049	7.06231	7.68222	6.06828	5.75528	4.14668	2.64406	2.23831	2.23218
6030468B19Rik	0.000691053	66.5079	78.1332	84.5731	77.5215	68.9014	41.1743	26.1905	17.9814	13.5241	4.4518	4.78719	0	0	0	0
6230400D17Rik	0.32787	0	0	0	0	0	0	0	1.07878	0	0	0	0	0	0	0
6330403K07Rik	0.290322	5.37187	2.74065	1.52099	0	0	0	0	0	0	0	0	0	0	0	0
6330403L08Rik	0.0654118	0	0	0	0	0	0	0	0	0	1.06778	1.30534	0	0	0	0
6330418K02Rik	0.0620231	1.67621	1.40719	2.53789	1.59014	0	1.68561	2.20099	1.81964	1.43668	1.30114	1.29286	0	1.43761	0	0
6330562C20Rik	0.0081575	2.93504	4.80673	3.65646	3.13355	1.90633	1.55502	1.72453	1.26513	1.23782	1.52885	0	0	1.17872	0	0
6430548M08Rik	0.00994767	1.08923	1.47998	1.12297	1.3973	2.17046	2.5812	2.62116	3.31033	2.61732	3.06535	2.03967	0	0	1.25641	1.47067
6430550D23Rik	0.63456	0	0	1.2948	0	0	0	0	0	0	0	0	0	0	0	0
6530403G13Rik	0.0760649	3.45951	2.21546	1.92672	2.25075	1.68265	2.06963	1.03516	3.30592	0	1.31411	0	0	1.39888	0	0
6530409C15Rik	0.374436	1.40655	0	1.09014	0	0	0	0	0	0	0	0	0	0	0	0
6720401G13Rik	0.379517	0	1.19659	0	1.1324	0	1.89621	1.25236	1.12257	1.83593	1.49378	1.52941	1.47835	0	0	1.92168
6720427I07Rik	0.812663	0	0	1.13893	0	0	1.80236	0	1.11077	0	0	0	1.41959	1.02087	0	0
6820431F20Rik	0.326732	1.88663	0	1.59442	1.33202	0	0	1.00515	1.39491	1.28736	1.29403	1.32391	1.10636	1.05726	0	0
8030462N17Rik	0.00181464	5.07577	4.04882	5.54493	4.62473	3.36564	2.35443	2.16808	1.79925	2.10697	1.81316	1.27679	1.11206	0	0	0
8430429K09Rik	0.634962	1.52306	0	0	0	0	0	0	0	0	0	0	0	0	0	0
9030025P20Rik	0.0785534	3.2481	2.90206	3.16799	2.49858	2.27514	2.81446	2.84999	2.77532	1.86163	1.97887	2.00255	2.84266	2.5625	1.37612	1.32643
9030616G12Rik	0.000595434	0	0	0	0	0	0	0	0	0	0	0	1.29024	1.94178	1.87676	3.61631
9030619P08Rik	0.0880968	0	0	0	0	0	0	0	0	2.91674	3.98464	4.83509	20.7148	56.1301	3.88972	2.36964
9030622O22Rik	0.00177837	0	0	0	0	0	1.11841	1.04243	0	1.73726	2.72519	2.14293	3.2938	3.77392	2.27677	3.44492
9130023H24Rik	0.145216	1.43247	1.49816	1.55262	0	1.29054	0	0	0	1.39497	1.10778	1.2644	0	0	0	0
9130221H12Rik	0.000116113	8.40051	9.82111	10.2856	9.69049	8.20047	8.06251	7.42762	6.18419	4.73384	3.05229	3.78692	3.23616	2.29008	2.38526	2.33828
9130230N09Rik	0.592901	0	0	0	0	0	0	1.51953	1.53064	0	0	1.06885	0	0	1.11361	0
9130409I23Rik	0.332303	0	0	0	0	0	0	0	0	0	0	0	0	0	1.72506	0
9230104M06Rik	0.182908	1.08887	1.03116	1.00762	0	0	0	0	0	0	0	0	0	0	0	0
9230111E07Rik	0.816252	0	0	0	0	0	1.14121	0	1.61214	0	0	0	1.29667	0	0	0
9230112E08Rik	0.758308	0	1.05798	1.04024	0	1.30702	1.36012	0	1.2199	1.04798	0	0	0	0	0	1.41052
9230114K14Rik	0.370088	0	0	1.03931	1.06742	0	0	0	0	0	0	0	0	0	0	0
9330020H09Rik	0.0697644	1.37863	1.40466	1.57588	0	0	1.19348	0	0	0	0	0	0	0	0	0
9330133O14Rik	0.052901	1.52402	1.17668	1.42488	2.14882	1.62562	1.8376	2.89806	2.47504	1.4603	1.38282	1.5696	1.42845	1.24059	0	0
9330151L19Rik	0.381294	2.31379	1.40304	2.0848	2.24304	1.68185	2.45033	1.8076	1.98264	1.45717	1.6217	1.34901	2.54034	1.65941	1.03156	1.60108
9330160F10Rik	0.0867226	1.35487	1.43552	1.28632	0	1.66451	1.63207	1.21502	1.43554	1.09596	1.00124	0	0	0	1.02732	0
9330162012Rik	0.00445367	0	0	0	0	0	0	0	0	0	0	0	1.21286	1.34392	1.10515	0
9430002A10Rik	0.184702	1.00706	0	0	1.20543	0	1.16421	0	0	0	0	0	0	0	0	0
9430008C03Rik	0.00267533	8.95834	7.98913	7.53041	6.03714	5.23562	9.85535	9.68448	7.39477	6.61841	6.89953	6.97047	4.55808	3.60553	2.07566	1.90769
9430015G10Rik	0.00154447	10.6406	6.92199	10.2795	8.29293	7.49719	5.28311	4.18902	3.49202	3.57714	3.02299	2.5043	2.15909	1.51721	0	0
9430038I01Rik	0.968958	3.07446	4.78983	3.58921	3.8242	2.71264	4.29008	3.7343	6.32245	3.26658	2.39	1.85667	2.39548	9.2666	1.45628	2.26038
9530027J09Rik	0.0703854	1.94174	1.4633	1.56748	1.64584	0	0	0	0	0	0	0	0	0	0	0
9530068E07Rik	0.0348111	34.5394	32.7962	31.2654	32.9072	31.8199	29.8285	42.5828	52.2141	43.2524	50.5606	38.6933	53.1162	40.72	44.8169	31.3722
9530077C05Rik	0.645485	0	0	1.01136	0	0	0	0	0	0	0	0	0	0	0	0
9530082P21Rik	0.0040543	1.58521	1.70239	1.74296	1.18972	1.37687	1.27338	1.51593	2.63519	1.9563	2.44996	1.72051	3.47788	3.68261	2.34063	2.25849
9630013D21Rik	0.115336	0	0	0	0	0	0	0	0	0	0	0	0	3.23323	0	1.26624
9830144P21Rik	0.0307958	2.32267	1.15789	1.63209	1.46946	0	1.01024	0	0	0	0	0	0	0	0	0
9930012K11Rik	0.645025	1.35558	0	0	0	0	0	0	0	0	0	0	0	0	0	0
9930021J03Rik	0.123315	2.51011	1.29614	2.77006	2.7867	1.34233	2.97547	2.56812	2.00541	1.89486	2.41947	2.31822	2.33411	1.45552	0	1.24362
9930104L06Rik	0.00193501	3.64811	2.95436	2.61714	2.77084	2.05367	2.13123	2.27641	1.59997	1.41291	1.08607	1.28766	1.0966	1.48118	0	0
9930111J21Rik2	0.639003	0	0	0	0	0	0	1.34855	0	0	0	0	0	0	0	0
a	0.0687157	1.00802	1.21675	1.20617	0	1.06656	0	0	0	0	0	0	0	0	0	0
A030003K02Rik	0.638958	0	0	1.20504	0	0	0	0	0	0	0	0	0	0	0	0
A130010J15Rik	0.668742	2.84563	2.30466	2.85342	2.1939	1.63656	2.01977	1.61183	2.57873	2.82187	2.73768	2.24842	3.64536	2.74842	1.66437	1.37851
A130014A01Rik	0.471373	0	0	0	0	0	0	0	0	0	0	1.00304	1.03854	0	0	0
A130049A11Rik	0.0115811	2.57384	1.27793	2.11492	1.74063	1.2798	1.53844	1.40667	1.36745	1.02096	0	0	1.23212	0	0	0
A1bg	0.327843	0	0	0	0	0	0	0	0	0	0	0	0	2.52286	0	0
A1cf	0.0189031	2.67283	2.03528	4.65441	4.66672	3.47894	4.08086	3.79027	3.9325	6.08573	9.68189	7.67942	10.2365	8.63874	5.09892	6.31148
A230005M16Rik	0.258911	4.00587	5.06775	1.93309	1.67464	2.28758	1.5572	1.21073	1.42467	1.39404	1.91388	1.34486	1.66799	0	2.01464	1.66274
A230020J21Rik	0.0312886	3.00754	2.73341	1.83327	1.54536	1.4879	0	1.2362	1.05546	0	1.39637	1.4079	0	0	0	0
A230056P14Rik	0.0166489	1.24303	0	1.41474	1.22029	1.13688	1.11936	0	0	0	0	0	0	0	0	0
A230060F14Rik	0.0270252	3.20618	5.576	4.77684	2.66334	2.82187	1.59466	1.51434	1.23166	1.84813	1.30983	1.33583	1.06822	0	1.74053	0
A230072C01Rik	0.634516	0	0	0	0	0	1.18814	0	0	0	0	0	0	0	0	0
A230083G16Rik	0.0643957	0	0	0	0	0	0	0	0	0	0	0	0	1.5017	0	1.74495
A230087F16Rik	0.266935	3.75091	3.29833	2.42532	2.38448	3.35481	3.74668	3.73954	4.64589	3.18403	3.9421	3.99699	5.00008	3.2737	3.98889	3.15168
A230103J11Rik	0.643784	1.10556	0	0	0	0	0	0	0	0	0	0	0	0	0	0
A2m	0.213628	3.38115	5.3843	18.139	40.1672	88.5567	174.089	322.014	12.374	9.19286	8.51299	4.60213	0	0	0	0
A330035P11Rik	0.327817	0	0	0	0	0	0	0	0	0	0	0	1.25458	0	0	0
A330040F15Rik	0.055868	0	0	0	0	0	0	0	0	1.29989	2.72556	2.0531	2.14892	0	0	0
A330094K24Rik	0.369986	0	0	1.44736	1.57353	0	0	0	0	0	0	0	0	0	0	0
A430005L14Rik	0.734754	27.8216	24.0096	21.7447	20.0434	21.3111	12.9156	14.1081	24.2362	17.9607	11.5226	17.5413	17.0409	22.3336	22.0204	12.2643
A430018G15Rik	0.0109779	1.65776	1.59762	2.17653	1.70704	1.06687	1.9764	2.569	2.36473	3.63457	3.56204	3.50975	5.04312	4.93032	3.47616	2.13752
A430033K04Rik	0.0799917	2.50857	0	1.39648	1.87386	1.06727	1.1495	1.10208	1.59406	1.08287	1.35083	1.22118	1.13579	0	0	0
A430046D13Rik	0.283082	0	1.5053	1.08102	0	1.11922	1.15825	0	0	0	0	0	0	1.51181	0	0
A430071A18Rik	0.332276	0	0	0	0	0	0	0	0	0	0	0	1.66073	0	0	0
A430104N18Rik	0.00814138	31.3569	24.0714	42.3132	26.498	17.2245	27.7088	24.6181	40.3125	15.4001	8.59567	8.1179	1.67024	2.51506	0	0
A530017D24Rik	0.141338	2.04161	1.07218	1.51684	1.2999	0	1.32079	1.15074	1.39525	0	1.20484	0	1.09954	0	0	0
A530020G20Rik	0.026877	0	0	0	0	0	0	0	0	1.05613	1.19388	1.1444	1.003	0	0	0
A530084C06Rik	0.170637	0	0	0	0	1.28047	2.18513	3.17692	1.50809	2.39642	3.93321	1.99816	3.60771	2.15169	1.13269	1.70565
A630001G21Rik	0.00634542	2.09597	1.04454	1.34733	2.07083	1.43622	2.63116	1.9511	4.74621	3.05917	2.07723	1.24898	0	0	0	0
A630052C17Rik	0.184771	0	0	1.30266	1.0882	0	1.14193	0	0	0	0	0	0	0	0	0
A630076J17Rik	0.00876935	0	0	0	0	0	2.04672	6.65761	3.76606	15.1061	26.4585	14.9351	6.36004	1.52028	2.36928	0
A730011C13Rik	0.332248	0	0	0	0	0	0	0	1.45604	0	0	0	0	0	0	0
A730015C16Rik	0.00663425	17.1561	21.8045	14.5447	14.316	10.551	9.59012	9.69315	7.18634	6.85829	6.07059	5.14039	3.96416	3.86832	7.05091	6.811
A730017L22Rik	0.0238889	0	0	0	0	0	1.03226	0	0	2.18987	1.13691	1.68534	0	0	0	0
A730036I17Rik	0.373062	0	0	0	0	1.07038	1.33458	0	0	0	0	0	0	0	0	0
A730061H03Rik	0.384	1.00869	0	1.17143	0	1.38034	0	0	0	0	0	1.29827	1.38742	1.18797	0	1.47506
A730085K08Rik	0.40092	2.16511	1.7101	2.22236	3.09975	2.03592	7.30615	9.76934	1.99874	3.31138	1.99409	1.59378	1.91308	2.02529	2.39967	2.75048
A830035O19Rik	0.840156	1.47147	2.62538	1.79626	1.51468	2.10391	1.05947	1.58172	1.85239	1.58977	2.42882	1.16156	1.295	1.63709	2.75753	2.07512
A830082K12Rik	0.643921	1.08151	0	0	0	0	0	0	0	0	0	0	0	0	0	0
A930001C03Rik	0.324485	0	0	0	0	0	0	0	0	0	0	0	1.35522	0	0	0
A930004D18Rik	0.61378	1.48702	1.09148	0	0	0	0	0	0	0	0	0	1.27748	0	0	0
A930005H10Rik	0.390769	2.73058	3.98954	3.90207	3.42272	1.53256	1.61713	1.90015	3.50997	1.90536	2.14937	1.71719	1.60146	3.3596	5.06222	4.04225
A930006K02Rik	0.00125551	5.47748	6.91746	13.4562	13.0896	9.50174	9.79433	6.04502	3.82534	2.89923	1.51678	2.33453	1.17659	0	0	0
A930015D03Rik	0.0835149	1.13258	0	0	0	0	0	0	1.08507	0	0	0	1.6306	0	1.32912	1.33873
A930018P22Rik	0.32779	0	0	0	0	0	0	0	0	0	0	0	1.08313	0	0	0
A930029G22Rik	0.642639	0	0	0	1.07506	0	0	0	0	0	0	0	0	0	0	0
A930033H14Rik	0.327764	0	0	0	0	0	0	0	1.0029	0	0	0	0	0	0	0
A930035D04Rik	0.0566574	1.52465	2.38847	1.95082	1.22546	0	0	1.00335	1.04088	1.14925	1.07767	1.29559	0	0	0	0
A930039A15Rik	0.255938	0	0	0	1.36592	1.42059	0	1.67913	0	1.0997	1.77186	2.79895	2.55558	2.15935	0	2.51545
AA465934	0.000843143	2.73413	2.76798	4.5677	3.12278	3.52544	3.37909	2.49793	1.80279	1.68455	0	0	0	1.00799	0	0
AA467197	0.416488	0	0	0	0	1.4151	3.40991	2.445	2.35877	0	1.2673	0	0	0	0	0
AA986860	0.000773761	5.53454	5.75457	6.10697	5.35492	4.35141	3.47841	1.73561	1.24621	0	0	0	0	0	0	1.10623
Aaas	0.00772734	30.5185	34.9195	26.0345	22.5421	20.5497	12.0283	10.3688	9.56073	11.1432	8.62062	7.96992	6.01199	6.1057	5.74259	4.06073
Aacs	0.0724378	10.8647	13.7139	9.65825	9.01756	10.2085	11.918	11.2879	3.13605	3.18623	3.56482	3.14364	2.83619	21.5522	37.6978	11.9209
Aadac	0.0101665	28.5295	16.2991	49.4107	83.5617	58.1229	106.957	94.415	79.9352	124.666	180.643	183.786	161.875	166.922	113.818	144.101
Aadat	3.12839e-05	1.6998	1.7374	3.74894	5.29954	4.82645	6.02894	6.88411	15.5257	18.1477	26.6642	28.4414	31.4954	33.5127	34.7667	37.0028
Aagab	0.00582733	11.5433	10.6211	11.2124	10.7511	9.55492	6.86646	7.93399	8.31871	9.34673	8.89913	9.36792	6.2764	4.83938	6.53897	5.62432
Aamdc	0.0154815	1.21822	3.93434	3.58002	3.79975	2.93346	2.58663	2.77254	1.28018	2.04166	1.77955	1.7426	3.04785	3.75341	6.1719	4.73484
Aamp	0.675984	72.893	91.48	67.0085	70.5691	72.0021	69.1081	60.5782	81.6675	60.0651	60.1736	62.4433	68.2659	66.0503	85.1802	61.844
Aar2	0.176594	8.31247	12.6349	8.03911	6.77121	7.68	6.03792	5.36397	5.85297	6.36208	5.48173	4.44188	4.74482	5.44692	8.1547	4.74651
Aard	0.200628	2.05389	1.1115	1.04174	1.28792	1.07719	0	1.19762	1.32372	1.64804	3.13184	2.39963	2.48925	1.59627	0	0
Aars	0.355146	48.3895	68.1045	47.1702	38.5792	42.8596	25.0828	24.2691	23.652	27.1166	25.8531	32.8558	11.5474	22.1877	59.8619	35.8121
Aars2	0.915763	6.85546	7.76035	4.97299	4.57626	4.87071	4.06629	3.59136	4.58338	5.14053	4.9882	6.20824	3.64718	6.49973	6.83402	5.34197
Aarsd1	0.0465765	32.065	44.8737	32.2867	27.2882	23.3427	14.7908	11.0589	10.8848	13.2794	9.67077	15.6689	9.42464	13.9642	17.2259	11.798
Aasdh	0.0117941	3.84568	2.13438	2.08898	3.63379	2.74082	1.47357	1.93595	2.03595	1.74029	1.15816	1.69523	1.32511	0	1.03902	0
Aasdhppt	0.940583	9.26183	5.90834	7.07801	7.37034	3.62834	5.4941	5.21119	6.70638	6.27564	5.41429	6.55317	5.64898	6.87257	4.59529	6.73439
Aass	0.0179082	11.6244	9.87173	12.563	13.943	11.2721	12.2687	7.39429	15.0037	24.9077	20.6373	26.0241	8.99094	51.6171	34.7832	46.6024
Aatf	0.0389756	23.8598	23.7145	17.0872	16.4912	11.2584	8.30923	6.38143	11.4433	7.85018	6.09467	7.14174	6.39288	5.11787	5.75351	4.52957
Aatk	0.616005	0	0	0	0	1.05421	0	1.22095	0	0	1.34174	0	0	0	0	0
AB124611	0.0582122	2.31748	3.79287	4.35538	9.28027	13.1187	12.026	13.4073	18.2249	9.86732	12.0924	7.70911	5.10293	3.17532	2.49522	2.16007
Abat	0.153566	9.31255	10.4696	12.0401	17.9731	23.6363	23.9246	15.7631	14.0726	21.2237	28.4491	31.3915	10.5335	56.2458	34.2091	27.4918
Abca1	0.624316	6.03378	4.23004	8.73674	11.4116	9.83085	16.7394	11.993	8.26322	12.2029	15.6954	11.8525	12.2497	7.52814	5.40178	12.5395
Abca2	0.0276764	3.07838	3.38137	2.27141	2.68307	2.55727	1.75813	2.39266	2.85953	3.09304	4.04019	3.97884	2.00511	6.65264	8.5147	6.11304
Abca3	0.0180282	16.0281	20.1567	19.0913	16.4288	17.0991	11.5051	9.35327	6.63726	10.8567	9.18383	7.2441	6.29321	13.1252	11.1684	8.14539
Abca6	0.0222212	0	1.23969	1.82085	3.09626	3.47492	5.47203	10.37	19.8157	9.88508	14.6859	9.18029	18.6377	20.1446	6.55215	7.38005
Abca7	0.00021706	17.3913	18.5111	17.0577	16.7874	17.3435	13.5314	8.14158	7.10768	6.23501	3.51994	3.28584	1.15848	1.19787	1.40504	1.25712
Abca8a	0.0761011	0	0	0	1.50822	1.81356	6.7898	17.4754	9.15271	16.6505	24.2385	13.8889	23.5551	9.4647	8.42071	3.42177
Abca8b	0.769817	4.40468	2.12934	5.11559	6.60236	5.44882	16.7331	25.0526	6.40845	13.6284	14.7809	14.0126	15.0421	11.8357	4.12101	4.80125
Abca9	0.0730876	0	0	0	0	0	0	0	0	1.02784	1.5412	0	0	0	0	0
Abcb10	0.000341237	110.01	102.235	121.673	111.917	93.8114	78.5161	44.9167	25.593	32.6154	13.9274	13.2448	3.14775	5.67719	7.41194	6.75622
Abcb11	0.00207289	0	0	2.58217	6.37989	5.87277	14.5697	35.6994	13.7012	35.0272	53.5739	31.8613	45.5209	76.1209	58.4787	56.5006
Abcb1a	0.195478	0	0	0	0	0	0	0	0	1.00186	2.06934	1.10767	2.82473	0	0	0
Abcb4	0.00644757	19.9591	20.9556	28.9948	26.8576	20.1277	20.6431	27.0399	44.2498	41.8404	40.8295	36.034	42.0147	27.3635	22.6467	20.5996
Abcb6	0.0200383	44.167	52.5814	43.4396	38.5171	37.4703	25.8213	17.3776	22.0891	21.1151	17.402	16.4661	17.2194	22.3137	25.3006	15.9338
Abcb7	0.407069	8.6212	4.2689	8.79522	7.97434	4.20983	5.54387	4.1721	4.95524	4.95907	5.78625	5.17922	6.72883	5.2802	2.32329	4.01499
Abcb8	0.214356	13.8432	18.9547	12.2727	12.2734	13.7055	11.368	11.5018	12.7629	11.189	10.9251	11.6311	10.7169	13.5079	10.7405	7.39989
Abcb9	0.000372946	3.16303	3.914	3.83393	4.40883	5.17403	3.63287	2.86695	2.18872	2.23285	1.6475	1.70338	1.01774	1.05396	1.05213	0
Abcc1	0.210776	2.93208	0	1.79787	1.73492	0	0	0	0	0	0	0	0	0	0	0
Abcc10	0.0489881	1.22573	1.77006	1.23529	1.22144	1.58844	1.76755	2.04786	2.37761	1.52912	1.9959	2.22032	2.96722	2.82096	1.60085	2.15624
Abcc2	0.00594439	5.59388	5.5854	7.28522	7.6963	7.14054	10.6103	17.3146	23.5375	20.4314	31.1115	21.5785	33.3394	36.3709	14.3277	19.2947
Abcc3	0.0119582	2.30051	2.96869	2.42678	3.32657	5.34454	3.90212	4.59482	5.7925	5.31977	6.94654	4.68542	7.01413	15.9916	21.8854	7.68535
Abcc4	0.0216758	1.80268	2.10922	2.16912	2.06779	1.97281	1.04088	0	1.49476	1.27422	0	0	0	0	0	0
Abcc5	0.00215326	8.57243	6.98145	7.8106	6.55647	5.93148	5.23721	3.69085	5.86736	4.25687	4.97561	2.996	2.79574	1.40664	0	0
Abcc6	0.00695707	3.88429	5.56956	6.40526	10.8975	15.0713	15.4527	16.7839	14.338	23.6094	34.8451	36.2838	47.3328	39.7849	28.7267	21.2063
Abcc9	0.0101792	2.01908	1.71379	1.83725	1.60022	1.13628	1.67918	2.44365	3.64945	3.87081	4.48288	4.89089	3.77409	2.28523	0	0
Abcd1	0.137818	6.09792	10.081	5.91547	6.12143	8.88894	4.37112	4.50563	6.82425	4.58829	4.71948	3.26737	3.2256	4.1684	5.64055	3.0473
Abcd2	0.0372935	0	0	1.07033	2.24197	2.4025	6.43949	16.8091	31.0973	18.4519	25.5885	17.1403	29.5723	18.5084	0	0
Abcd3	5.23719e-05	11.833	8.22713	11.2283	13.7565	11.1198	14.2784	23.1072	58.9987	40.8597	53.362	53.0224	63.4627	74.5626	64.8047	49.7746
Abcd4	0.00120034	2.60424	2.28281	2.13968	2.54775	2.36791	1.95114	2.49614	2.54605	2.93603	2.66641	3.13222	2.99585	3.49444	3.44438	3.75447
Abce1	0.0822771	49.8829	19.8154	35.0042	31.835	12.4344	19.802	13.5251	14.7669	16.4922	13.1648	14.2091	7.82927	13.8233	6.47196	12.6869
Abcf1	0.0116392	75.0995	88.04	61.8428	54.5524	47.3906	40.3934	33.5668	36.717	30.1309	24.5473	24.328	23.8831	24.597	27.8	22.0185
Abcf2	0.030628	45.7553	53.6072	35.5457	28.9387	25.3441	17.1494	12.9428	16.4778	14.0326	11.5366	10.6887	7.96406	9.89011	15.2692	11.8803
Abcf3	0.276176	18.2863	18.0307	15.9628	14.9606	14.2906	11.7343	12.0055	13.076	12.9426	11.9443	13.1292	12.4176	15.0735	16.5681	16.3144
Abcg1	0.0398136	2.5752	3.27829	3.13917	4.29824	5.90325	5.30236	5.74114	5.12432	4.70173	4.64597	3.85957	4.40078	1.50796	1.34221	0
Abcg2	0.85945	7.20398	4.392	9.69633	11.7548	6.4148	6.76907	16.0821	2.5453	2.18689	21.9871	1.64745	2.44686	11.9041	11.8363	1.37431
Abcg3	0.0138857	1.1053	0	1.1451	2.18867	1.51395	1.79437	3.06536	2.7964	3.12896	3.86169	2.40495	1.5399	1.06463	0	0
Abcg4	0.000358311	15.7059	17.1223	17.5028	14.789	18.3677	10.8922	6.84281	4.17281	5.19077	1.83722	2.0414	0	0	0	0
Abcg5	0.0125627	0	0	0	0	0	0	1.97117	12.6796	29.2779	32.7107	20.6288	59.6136	35.4232	12.6365	10.384
Abcg8	0.0154852	0	0	0	0	0	0	1.14805	8.35972	18.34	24.6003	15.6031	45.9606	16.6264	12.8995	8.47482
Abhd1	0.200285	2.06674	1.31428	1.41705	1.62006	1.20442	1.97489	2.94071	3.5841	1.29733	2.8625	3.16098	2.91236	2.42286	1.55252	2.19105
Abhd10	0.10616	5.32953	4.82491	5.84576	5.61789	3.57482	3.15574	3.16307	2.93746	3.29201	3.73347	4.78201	4.46831	2.91199	1.26894	1.88086
Abhd11	0.0513864	20.6266	21.4841	14.644	16.1528	13.2222	16.6172	14.8526	27.0256	17.3856	16.2575	19.9437	24.8539	28.1638	23.5713	19.5292
Abhd12	0.324695	12.0232	14.6349	10.0114	9.86579	12.6484	7.95754	9.45358	13.8389	13.222	13.9659	12.565	9.21552	14.4953	18.8563	10.7788
Abhd13	0.0320081	3.4255	2.79352	3.45148	2.89434	2.25799	2.54037	2.3112	3.37088	3.1533	3.35631	3.21731	2.21245	2.44521	1.8924	2.72761
Abhd14a	0.0943772	12.9122	18.0859	11.5819	9.95953	12.5419	8.85498	11.4483	9.74716	8.43412	8.29931	8.22323	11.7999	6.56719	10.33	5.50059
Abhd14b	0.000418839	11.9555	17.571	17.8551	23.6862	31.3059	27.613	35.7955	49.6645	55.7663	62.9996	63.858	99.7977	103.535	129.454	63.96
Abhd15	0.00377469	1.20875	1.37993	1.25076	1.30664	2.97705	0	1.33257	6.00373	5.02515	6.53621	3.86774	3.99398	10.6216	8.2869	4.44981
Abhd16a	0.044285	22.8211	30.8008	24.0447	24.9081	25.0083	19.1487	19.0437	19.4805	19.5338	16.8078	20.5489	17.4259	16.2679	21.6579	14.5665
Abhd17a	0.292054	61.0423	100.06	58.9722	55.0834	66.142	48.6178	47.2411	50.804	49.2094	48.0181	46.9324	41.3038	45.1414	69.7276	38.8169
Abhd17b	0.112001	4.73867	3.01377	3.98613	4.49211	2.77018	4.85305	3.65109	7.98808	5.22708	5.92929	5.41566	8.46697	4.89063	3.33703	4.13663
Abhd17c	0.00981823	20.6044	21.5303	17.2046	19.1801	19.5631	24.1928	21.5041	26.5474	25.9843	29.2143	23.9193	30.6376	21.8387	26.63	26.9419
Abhd2	0.0107655	10.3043	10.6134	12.9511	15.3176	14.1401	14.7295	19.6927	43.7926	70.4618	111.549	90.576	88.9923	21.1838	8.02548	7.37699
Abhd3	0.000545363	2.69469	1.95274	3.70672	4.20689	3.40049	4.62976	6.25011	8.58683	9.19422	11.0456	11.3948	10.9003	12.2757	19.3872	18.1881
Abhd4	0.0645244	8.91294	11.2623	8.63792	9.64146	11.3839	9.22144	9.40108	9.64667	9.59022	10.0398	10.4159	11.9745	12.8564	16.7405	9.48996
Abhd5	0.319205	9.33234	10.3822	11.8669	10.8966	9.77003	24.0537	28.2447	10.1112	12.2988	10.9041	7.96871	7.02853	7.20384	12.8131	9.94764
Abhd6	0.000940862	3.60389	4.04538	3.63413	3.23025	2.83901	2.78807	3.28229	6.69098	7.49669	7.57875	9.53493	8.87252	13.637	18.2754	10.1943
Abhd8	0.0401249	10.9199	14.2869	9.59429	6.66461	6.44258	4.9688	4.05358	3.76817	4.03268	3.43091	2.86748	3.34387	4.34172	4.46083	3.45915
Abi1	0.135903	11.4683	10.7325	14.2569	11.7288	12.3253	11.9488	8.63551	12.0387	11.1927	10.4322	9.77355	11.9795	10.0987	6.07448	6.7859
Abi2	0.192594	2.58201	1.34251	1.86984	1.83768	1.17888	1.42392	1.23545	1.78438	1.65892	1.48808	1.40534	1.98044	1.39697	0	0
Abi3	0.00706589	10.0899	15.4708	10.4565	11.1973	19.9578	10.3798	8.12518	8.87441	5.18082	4.42163	4.20535	2.14897	3.21586	6.0585	3.49683
Abl1	0.0153573	12.8688	14.4832	9.8106	10.0537	10.7728	7.01929	6.30152	8.23951	8.66191	9.54226	8.15703	6.41473	5.13267	4.03983	2.87178
Abl2	0.000304542	2.46297	2.42246	2.79983	2.20172	2.51814	1.60162	1.34539	1.89819	1.38266	1.3438	1.07519	0	0	0	0
Ablim1	0.0437704	1.62643	1.43437	2.71283	2.37465	2.73514	4.34954	3.87759	5.05736	5.53453	5.02967	3.74363	4.89471	1.73801	1.69564	1.30187
Ablim3	0.032467	0	0	0	0	0	0	1.41229	1.61491	0	0	1.12122	0	2.52404	8.04626	5.75924
Abr	0.029654	2.76965	0	2.52993	3.24128	4.11397	2.67612	2.17989	3.2989	2.21947	3.06348	0	0	0	0	0
Abracl	0.00834855	36.2504	25.1989	30.5517	26.0792	15.641	20.5502	16.3272	20.0172	17.7188	14.1711	13.4879	11.0633	11.1114	3.58684	6.53172
Abt1	0.0411464	18.2485	17.9743	16.2867	12.2984	11.2348	10.1918	8.53435	9.59627	8.22694	9.21777	8.91928	8.92929	7.91181	9.29067	8.24755
Abtb1	0.00073051	30.2296	43.1004	38.261	42.9349	49.9169	44.7651	33.1687	27.1788	18.5917	12.6914	11.9519	13.5553	14.8874	21.9218	13.9938
Abtb2	0.0356352	2.11269	1.89132	1.80108	2.51238	2.73421	1.64182	1.96516	1.4023	2.23193	2.44126	2.06948	2.02076	4.0264	4.22094	2.94227
AC087902.1	0.238355	0	0	0	0	0	0	0	1.78095	1.96091	1.04645	0	8.60241	0	0	1.7488
AC110903.1	0.638913	0	0	0	0	0	1.84008	0	0	0	0	0	0	0	0	0
AC113593.1	0.00735295	4.53841	6.60698	8.98725	11.54	24.2362	17.5338	42.1598	75.2356	97.5748	104.664	89.6986	109.93	140.683	401.033	186.394
AC113593.2	0.0501804	0	0	1.82105	0	3.18542	2.65098	16.3621	93.0097	33.661	69.2262	46.8579	86.2964	57.8091	636.119	271.369
AC118710.2	0.000147077	0	0	0	0	0	0	0	0	0	2.4134	2.65096	26.7129	21.8141	27.2145	45.5861
AC119853.1	0.331823	5.59506	3.09541	8.00701	3.61265	3.63893	3.29009	4.76984	5.023	6.62929	4.53669	3.4556	3.68635	4.353	3.09973	1.82766
AC120404.1	0.0729625	0	0	0	0	0	0	0	1.52086	1.01667	0	0	0	0	0	0
AC121131.2	0.00902899	27.9634	33.64	23.8448	18.7403	21.9084	18.146	15.8033	16.0129	16.7138	9.77597	12.3375	10.4556	12.8587	9.67818	9.45899
AC122290.1	0.0831089	1.63605	3.24082	3.04705	1.18093	2.20632	0	1.01803	1.11105	0	0	1.26752	0	0	0	1.17114
AC123611.1	0.00770904	4.23727	4.28156	4.32348	2.6098	1.60822	3.75122	3.46193	1.63186	1.81162	1.49672	0	1.72282	1.6549	1.70188	0
AC124584.1	0.0167332	1.14382	0	3.45224	1.35213	2.34552	1.64347	1.06002	0	0	0	0	0	0	0	0
AC127339.1	0.0107934	2.61151	1.55327	2.54882	1.98525	1.79097	1.59561	0	1.0457	1.00265	0	0	0	0	0	0
AC132867.1	0.339436	1.35627	0	1.19938	1.49526	1.24132	4.34374	2.99867	0	0	1.82547	1.14779	2.60953	0	0	0
AC158802.1	0.0101338	5.45522	2.96553	5.21788	5.76263	5.11568	4.80326	2.6751	3.4465	2.45282	2.82811	2.3688	2.35383	2.58589	1.95844	2.33919
AC166150.1	0.327737	0	0	0	0	0	0	0	0	0	1.13028	0	0	0	0	0
AC167036.1	0.00403109	13.843	15.9083	13.159	10.8913	9.79275	8.50782	9.79213	9.06064	7.95124	4.24858	4.92669	3.78711	4.2818	6.9709	2.82665
Acaa1a	0.00333938	17.679	27.1104	20.849	21.7077	30.5409	20.9691	26.7377	58.1487	44.7085	58.8145	46.6434	68.175	33.44	77.3257	46.8337
Acaa1b	0.0136201	4.43101	3.47978	4.49166	9.82052	17.5732	27.5975	58.1186	341.133	131.638	248.656	263.394	632.344	148.973	465.48	113.616
Acaa2	0.0113409	89.2294	137.944	124.967	177.323	347.016	390.327	509.839	572.93	495.998	656.36	712.92	787.088	512.081	653.674	353.949
Acaca	0.0352171	6.62577	6.06433	5.5728	5.80228	5.88283	1.75544	8.29288	0	4.38046	4.81623	1.192	2.17707	3.21387	2.48104	1.25903
Acacb	0.130853	0	0	0	0	0	1.321	7.28516	0	0	0	0	1.04366	2.32332	14.3533	5.15452
Acad10	0.0154608	1.26705	1.49971	0	2.09484	2.8778	3.11861	3.26364	3.85219	4.73057	7.47226	5.47976	9.16177	8.3327	5.47432	2.50606
Acad11	0.00231297	6.29443	6.642	9.93813	11.3828	12.2158	19.1138	27.0815	56.5168	39.7345	61.1913	46.9744	83.4986	41.956	39.09	41.9457
Acad12	0.285322	0	0	0	0	0	1.05179	1.7936	0	1.21626	1.96955	1.8167	4.95578	0	1.20634	1.17949
Acad8	0.000914789	6.06431	4.53538	4.76338	4.75127	4.40493	7.4186	6.83353	7.24627	7.16977	9.29746	8.2852	10.9119	11.6578	15.6621	10.5649
Acad9	0.742481	8.84506	8.65413	8.22023	6.44173	3.93672	6.73017	5.12137	6.08844	6.2743	9.89624	7.87431	8.94846	7.23592	4.87885	4.81791
Acadl	0.0722973	37.7566	33.7499	79.7109	66.2755	65.8744	83.5131	85.2363	187.208	137.354	173.381	178.989	276.15	92.0307	42.4478	41.5654
Acadm	0.24833	28.5067	20.7673	36.6518	45.4726	63.767	131.352	130.157	140.096	89.4732	135.079	138.695	217.503	104.21	46.8038	58.9418
Acads	0.00454817	21.9622	34.0246	25.0691	28.2027	42.2119	34.3448	42.6905	57.8635	51.439	71.1112	69.8177	102.916	63.2837	94.8919	48.4703
Acadsb	0.00135686	6.51238	3.81923	8.08983	8.57503	6.6322	9.58525	8.18593	5.8282	8.21848	10.7843	10.3694	12.313	21.5179	17.4242	21.2648
Acadvl	0.000917929	38.8541	43.3622	43.8266	52.9722	65.6657	69.6493	98.8942	168.857	145.957	163.977	164.854	236.438	147.974	167.174	118.495
Acap1	0.042318	5.024	3.28225	2.30083	3.62758	4.23225	6.69296	7.00674	5.4543	3.5075	4.21772	3.32577	3.55922	1.54137	0	1.16601
Acap2	0.0435502	4.78898	2.96426	4.21412	4.21287	2.92399	3.91005	4.23777	4.27227	4.38154	4.05176	3.94446	4.233	2.54482	0	1.54958
Acap3	0.00107175	8.68701	9.58536	7.5812	6.85114	6.76363	5.15092	3.96827	3.51222	3.59813	2.48206	2.62986	1.43284	1.86844	1.1276	1.06178
Acat1	0.0974919	21.4224	17.7454	34.2155	48.1794	49.1755	81.6001	130.61	120.235	144.554	197.861	207.527	288.903	81.2043	47.2622	35.0556
Acat2	0.147038	44.9492	42.6111	43.9252	44.7801	45.7741	48.2745	41.1723	18.9119	24.1065	30.8436	35.522	22.9584	90.3256	42.5128	46.9643
Acat3	0.00107313	7.87443	15.9465	22.1403	16.0001	18.6529	30.4262	20.7261	34.6588	52.621	69.7841	92.0106	58.9367	124.062	123.716	102.164
Acbd3	0.0100758	11.7143	8.77616	11.6285	10.9434	7.42319	8.94477	8.8819	8.46465	9.98644	9.14434	10.1874	8.3665	5.33174	3.59034	5.17872
Acbd4	0.081341	18.1184	14.7232	16.4491	10.0973	17.2102	8.97555	10.9644	8.05598	8.23843	6.59887	11.9836	11.268	13.7745	20.2125	14.3577
Acbd5	0.00434546	5.6487	1.52706	6.33371	7.6486	3.31012	7.21326	7.22883	12.824	9.18043	17.3285	18.2017	26.125	36.5984	10.8157	23.9196
Acbd6	0.0645582	46.4387	65.6619	38.6186	31.6348	34.2657	28.1905	25.1992	25.5885	17.7501	17.7885	20.6927	23.6058	27.4087	33.6027	21.2465
Accs	0.0529464	0	0	0	0	0	0	0	1.18621	0	1.40988	1.12209	1.48562	1.42793	0	0
Acd	0.0175447	20.7628	23.4441	15.8082	15.0503	15.5113	11.6704	10.5979	12.7466	10.6473	10.0835	9.32183	8.78441	8.6607	8.45052	7.82099
ACEA_U3	0.171321	0	2.5085	0	1.05577	0	0	1.03787	0	0	0	0	0	1.74363	1.6234	1.65577
Acer2	0.256104	2.93463	3.03675	2.51601	2.10938	5.34313	7.61866	7.02951	6.4502	4.6243	5.14175	5.36015	3.7842	4.6473	1.7441	1.55641
Acer3	0.0097535	4.35458	2.94211	4.10732	4.77515	2.8702	3.14014	3.26473	2.54424	2.71834	3.07744	3.30228	2.5069	2.17645	1.50648	1.68697
Ache	0.000436882	19.7942	16.8343	16.5153	14.7017	16.8767	10.9557	7.51643	7.02099	5.9164	3.07173	2.69534	0	0	0	0
Acin1	0.00019326	63.0756	67.2871	65.6374	55.2161	52.9451	53.5019	41.0743	31.8356	30.5226	25.4881	32.3592	24.0374	21.1561	14.4745	15.4942
Ackr2	0.188129	0	0	0	0	0	0	0	0	0	1.31974	1.59705	1.33465	0	0	0
Ackr3	0.331814	5.62427	2.09754	1.2005	0	0	0	1.02651	1.3133	1.86762	1.20204	1.26334	0	0	0	0
Acly	0.00801693	55.2123	54.0727	46.4175	55.0489	58.5536	54.0966	50.7446	18.8401	27.5562	28.3825	24.7496	12.8715	38.9989	60.2597	34.4995
Acmsd	0.0446889	2.96752	2.81716	3.92019	3.03979	2.00425	2.70515	1.28975	1.05249	1.44783	0	1.64146	0	8.65308	7.30278	6.39786
Acnat1	0.0222209	0	0	1.46416	0	0	1.88108	3.51708	3.7705	5.72824	7.48061	19.963	7.72597	12.1486	4.46704	10.1842
Acnat2	0.0102018	0	0	0	0	0	0	7.07327	4.73338	9.15321	11.2502	18.2665	10.0467	27.6876	7.57235	29.0317
Aco1	0.376461	15.2543	18.8034	16.6787	22.5594	44.5794	42.5259	34.1512	27.3544	33.313	41.1744	38.6062	27.3383	37.5772	52.0051	33.301
Aco2	0.0258175	90.9745	119.269	94.4804	79.2595	102.164	78.5449	71.1123	66.4713	72.2555	62.62	79.7408	70.718	71.4397	59.3114	42.432
Acot1	0.174777	14.888	19.8303	14.9446	21.6268	17.6379	12.2256	10.3556	37.8728	3.61154	6.20221	5.61603	7.26136	1.11879	5.30118	1.56454
Acot11	0.00491271	5.7081	4.96777	6.93989	4.32543	6.09187	3.01218	0	0	1.07197	0	0	0	0	0	0
Acot12	0.00554555	0	0	1.39954	2.36355	3.22835	4.70778	7.123	13.0668	12.3015	18.0529	17.7322	34.7313	23.9825	11.4498	10.9598
Acot13	0.0405149	21.5757	16.09	27.3909	24.2118	15.1143	23.9409	20.4257	24.5339	28.3425	31.1393	37.4307	57.763	47.9498	24.9851	27.4501
Acot2	0.392172	5.09329	4.24326	4.96878	4.63231	3.34079	3.76993	2.00357	13.0886	3.32687	5.78202	6.13076	12.2666	1.40445	0	0
Acot3	0.152775	1.42829	2.29407	2.0534	3.14547	2.51914	2.59796	1.58187	8.99006	3.55694	15.8029	13.3847	20.3947	2.15523	0	0
Acot4	0.0850948	2.3048	3.46167	4.5351	5.37819	4.27274	4.01241	4.67943	12.4176	5.69658	11.8018	12.2798	15.8931	6.73018	2.15752	1.51144
Acot6	0.920975	0	0	0	0	0	1.32282	3.40053	1.81653	0	1.06161	0	1.67961	0	0	0
Acot7	0.360605	26.7895	27.5212	15.267	11.7365	11.743	8.88557	9.37819	9.24382	10.0555	9.95501	11.7276	7.84391	14.7306	15.1553	9.71482
Acot8	0.124086	13.8459	16.6033	13.425	13.4561	16.9298	10.8509	9.87872	11.2169	9.53113	8.6028	11.1804	9.29402	8.45356	14.4026	11.9941
Acot9	0.00710788	5.46824	3.00196	4.80689	4.51504	2.72432	2.60612	2.85456	2.6246	2.77995	2.44397	2.04655	1.63968	1.41769	0	1.07627
Acox1	0.0014572	12.7672	13.0264	13.1105	22.8283	40.2152	60.9986	133.572	197.536	98.0212	161.091	137.222	434.589	169.792	305.752	296.369
Acox2	0.0105481	1.31457	2.69518	9.34238	18.3353	26.1367	30.3051	31.5802	22.5105	27.0243	32.3368	34.8235	39.0881	53.6095	55.5502	35.684
Acox3	0.0439365	1.77002	1.69755	0	1.74864	2.39891	1.81824	2.01963	3.11043	2.49245	2.34395	1.63473	2.08495	2.96267	5.15076	3.55326
Acp1	0.0123816	62.7942	39.394	65.3866	59.1506	35.0352	35.5894	24.8787	27.7121	28.7347	22.5456	24.2206	19.8856	22.6095	9.05551	15.5864
Acp2	0.00068249	5.53887	5.32716	5.75735	7.0798	6.61798	6.772	9.21309	10.7512	11.9072	13.9113	11.1027	11.0873	10.3128	10.0371	9.38644
Acp5	0.00269203	133.559	158.652	173.264	144.497	170.056	135.2	87.2567	48.0101	73.7007	62.2024	61.2512	48.5125	46.1807	116.491	71.3591
Acp6	0.000548981	7.73515	9.18309	6.5879	7.49997	8.59967	9.67695	9.2471	10.3125	9.16973	10.5657	11.9824	15.5788	14.1769	13.976	12.3008
Acpp	0.327711	0	0	0	0	0	0	0	0	0	0	0	0	0	0	1.17199
Acrbp	0.610083	2.86626	2.14858	3.00415	1.76779	1.39571	2.69609	4.24494	1.20513	2.49586	1.48599	2.91631	2.53105	3.52727	1.42734	3.01646
Acsf2	0.00128905	4.43767	5.66588	4.54732	5.7466	7.93983	5.17231	6.66195	15.195	19.1	25.7563	23.7261	32.1872	25.4712	61.7394	37.0911
Acsf3	0.0291604	7.24166	10.8834	6.368	6.4574	8.73942	8.46581	8.31217	8.04184	10.8629	10.9568	12.9803	10.9894	12.952	16.7022	9.88354
Acsl1	0.110357	23.0124	27.4031	40.1771	55.9463	82.7208	124.225	173.746	187.502	109.123	204.994	167.635	239.741	89.3556	135.15	61.592
Acsl3	0.0932115	11.9469	6.1839	11.2956	11.7961	5.46776	10.1267	9.06299	3.32183	3.70295	5.3326	5.8163	7.20094	12.9699	2.58234	6.81987
Acsl4	0.73271	6.56617	3.13328	6.80363	7.78075	3.43942	6.85683	5.09862	6.30531	6.81792	6.53164	4.59554	5.62617	11.6154	4.13211	5.8024
Acsl5	0.061693	45.5915	38.8091	52.0452	54.012	45.3757	60.7907	93.8195	114.833	69.4825	100.739	87.7082	101.269	69.0691	60.6445	44.8432
Acsm1	0.00137952	0	0	1.15555	4.94334	9.5656	28.8828	52.4867	41.8875	71.2081	80.3141	56.3549	61.489	111.999	150.005	120.235
Acsm3	0.00371079	0	0	0	1.56769	1.62161	4.0808	6.06965	6.68804	5.59971	10.1276	10.6179	19.9369	20.4824	8.01336	9.76812
Acsm5	0.000215258	0	0	0	0	0	0	0	1.87607	4.55489	11.9386	13.703	17.5553	25.6753	19.6642	16.4389
Acss1	4.60819e-05	30.3656	31.4445	36.5735	39.175	32.6872	30.1733	20.6545	8.84375	10.3585	5.06198	4.15194	1.05692	0	0	0
Acss2	0.0401099	12.9327	12.2836	13.4608	15.1336	16.1547	21.8413	30.5756	3.81886	3.89527	4.5482	4.23266	2.41482	52.4647	47.8261	28.2128
Acss3	0.14273	0	0	0	0	0	0	0	0	0	3.58816	3.16089	6.11165	4.29714	0	0
Acta1	0.0185495	1.11395	1.27085	1.4675	1.04133	0	1.489	0	0	0	0	0	0	0	0	0
Acta2	0.0257995	17.727	12.6051	6.83352	6.20144	9.8855	7.29702	10.5985	7.37887	22.777	21.4592	13.4616	5.99644	6.44744	3.178	0
Actb	0.00332004	661.657	797.883	556.843	533.592	566.223	505.398	469.717	475.606	510.683	409.42	374.726	168.812	289.175	351.044	289.164
Actc1	0.435896	4.19686	1.7628	0	0	0	0	0	0	0	0	0	0	0	0	0
Actg1	0.00316244	545.863	543.09	354.747	349.125	349.662	275.323	220.201	257.876	266.764	248.497	252.842	86.4802	114.369	45.9899	48.0304
Actg2	0.0154186	3.62347	3.01407	1.34002	1.02855	2.03016	0	1.07729	2.13285	3.56813	4.86581	2.0172	0	0	0	0
Actl6a	0.00459029	52.4404	45.9554	45.9818	41.0467	30.3453	21.6072	18.0017	19.4915	18.9399	14.2629	13.2559	6.83579	10.2689	7.74176	7.85174
Actn1	0.00693428	22.0932	22.5277	16.9561	17.6808	22.9722	15.8664	18.8692	18.0086	24.2746	25.1445	18.9469	17.7465	8.59613	8.16712	6.92456
Actn4	0.0350376	70.3863	98.1101	66.1792	68.4409	89.6932	48.591	44.7717	47.7282	59.2076	51.1912	53.6377	39.7076	45.67	40.9755	32.7525
Actr10	0.115095	12.001	10.6955	10.1545	9.80228	9.48451	7.74643	6.19733	7.30517	7.688	8.15707	8.17294	7.69116	7.98312	7.63653	6.11844
Actr1a	0.0132195	46.0916	55.4806	41.5248	33.5064	39.0106	28.5017	24.0563	25.4949	24.6672	20.6215	20.9282	16.0961	19.9733	25.4148	18.7425
Actr1b	0.706312	28.3252	31.6893	23.9394	19.8342	19.8479	16.1024	15.216	15.8884	22.3485	20.6312	19.124	16.5786	21.441	24.4549	20.2552
Actr2	0.164027	37.9432	14.9226	32.7065	32.1012	13.1036	23.1944	23.2056	24.8681	23.7866	25.548	22.3237	18.7865	18.6797	7.51952	16.7585
Actr3	0.000294341	75.9988	62.7047	65.8052	64.4609	58.89	56.4803	54.0546	55.44	55.5805	49.5891	42.0983	32.6555	29.2096	18.033	19.3983
Actr5	0.0305	7.37987	8.84518	6.15824	4.64256	5.08697	3.7247	3.25851	3.63909	2.75479	3.06892	2.83315	3.00358	2.92761	3.31184	2.17117
Actr6	0.573057	5.36965	2.25486	4.69807	4.08691	2.76178	4.48581	3.22948	3.09951	3.74679	3.46495	3.45919	4.91814	3.53958	1.59274	2.11329
Actr8	0.0308865	12.1018	11.2674	11.0798	9.10402	7.98861	8.53567	7.5771	7.61427	7.57267	7.37435	5.92129	7.93088	6.87387	7.35689	7.31102
Acvr1	0.143844	5.30945	4.43853	2.13948	4.96677	3.56448	3.46026	4.07647	4.92737	4.97248	3.92822	5.75478	4.25427	3.0754	3.15835	3.25294
Acvr1b	0.0105058	3.48962	4.26459	3.97113	4.35142	5.83643	4.58955	3.92062	4.85949	4.78985	5.23288	4.76234	4.04427	2.72375	1.79177	2.8178
Acvr2a	0.0499659	1.4043	0	1.10905	1.56805	0	1.57607	1.66582	2.06691	2.52499	3.13202	3.21157	2.80963	2.49438	0	1.64226
Acvr2b	0.792269	1.43182	0	1.19123	0	0	1.09355	1.21544	1.55497	0	0	0	1.28583	0	1.05453	0
Acvrl1	0.027189	0	1.10668	0	1.19866	1.4576	2.40226	2.37836	2.36788	2.0559	2.9155	1.83336	1.19006	0	0	0
Acy1	0.639447	15.8424	22.7657	15.5152	17.1451	21.4102	16.0489	15.9115	18.0105	21.2708	19.7124	24.3206	20.0338	31.8494	18.1128	10.6637
Acy3	0.00490248	5.82722	9.69428	6.76171	8.09879	9.28255	7.26314	7.39367	12.4979	17.3776	24.6781	32.1096	20.9029	34.9777	59.9499	31.3488
Acyp1	0.00125194	29.264	27.1391	28.161	24.672	16.463	16.3968	13.9298	7.38426	6.83962	5.14328	4.36331	5.22663	6.56	9.43313	7.03647
Acyp2	0.121113	2.17515	1.66727	2.36632	1.88409	1.54241	0	0	0	0	0	1.20908	0	1.30677	0	0
Ada	0.0303865	3.56113	5.75369	2.56066	2.32958	2.32408	1.94467	1.6956	1.92367	2.15848	1.42733	1.60657	1.28022	1.05593	0	0
Adal	0.448237	3.88585	2.62289	4.01918	3.7329	2.10185	2.31628	1.74611	1.81624	2.93359	2.51914	2.76607	2.86702	2.61013	1.51756	2.04416
Adam10	0.00300231	47.5607	24.6999	46.8077	47.826	26.4831	29.0861	18.1679	15.5984	19.3697	14.4971	11.4715	7.09563	5.22175	2.2654	3.18373
Adam11	1.81692e-05	0	0	0	0	0	0	0	0	0	0	0	1.76673	1.32513	2.34456	2.05994
Adam12	0.40908	2.54793	0	1.43406	1.20915	0	0	0	0	1.05206	1.5425	0	0	0	0	0
Adam15	0.00328235	5.74933	5.16615	4.17584	3.59227	5.50491	5.97254	7.20135	4.06552	4.02536	3.73014	4.52711	2.29928	3.04421	1.53595	0
Adam17	0.0278247	9.51808	5.5195	8.32146	7.27281	4.86893	5.07319	4.78897	5.1808	5.65599	6.6646	4.88725	3.49177	4.1085	2.00454	3.31646
Adam19	0.0460139	2.97075	1.71811	1.4202	1.20714	0	1.16301	1.60275	1.63926	1.82794	2.14893	1.34051	1.09276	0	0	0
Adam23	0.00977539	0	0	0	0	0	0	1.41207	2.33685	2.5245	1.98828	1.20062	2.33409	1.38458	1.19489	0
Adam8	0.235975	0	0	0	0	0	1.94254	2.60759	1.85019	1.33808	1.06207	1.49135	1.05522	0	0	0
Adam9	0.0143487	5.16227	2.35322	3.74791	4.27013	2.74806	4.33398	4.63816	5.47547	6.25875	8.73476	6.49968	8.14807	8.13749	5.433	13.6163
Adamdec1	0.00178163	0	0	0	0	0	0	0	1.17027	1.1157	1.38026	1.25006	1.28523	0	0	0
Adamts1	0.0779709	6.40124	3.47869	3.14292	3.56616	2.84366	4.15183	5.03327	3.31799	5.47665	9.73507	7.1839	5.87214	2.87762	0	0
Adamts10	0.423391	7.04149	3.58717	4.04007	3.8593	3.92849	4.96876	4.93462	4.53131	3.85851	4.78881	4.91755	6.22579	3.6632	1.08507	2.61765
Adamts13	0.165979	0	0	1.3766	1.32812	2.10925	1.76187	2.51789	2.40797	1.60607	2.75009	2.49928	1.91968	1.80076	0	0
Adamts14	0.387456	0	0	0	0	0	0	1.47832	1.47966	1.25235	1.31839	1.29251	5.45478	0	0	0
Adamts15	2.14488e-08	0	0	0	0	0	0	0	1.4578	1.33562	1.21524	1.11065	0	0	0	0
Adamts2	0.0197469	1.56844	1.82282	1.23985	0	1.01129	1.09236	1.76875	3.16765	3.12577	3.78174	2.97729	3.21434	2.52108	1.09517	0
Adamts7	0.0204251	1.23199	1.16107	0	0	0	0	1.14892	1.36295	3.64678	6.41343	6.01898	6.88384	5.71499	1.73766	1.45342
Adamts9	0.734432	1.89233	0	0	0	0	0	0	0	0	1.26298	0	0	0	0	0
Adamtsl2	0.148226	0	0	0	0	0	0	0	0	0	1.00719	1.49941	0	1.48141	0	1.75796
Adamtsl4	0.0880879	0	0	0	0	0	0	1.69188	2.80595	1.00465	1.64489	1.55404	1.69595	2.85101	0	0
Adamtsl5	0.00297976	2.35185	1.71596	1.66675	1.39473	1.30978	1.2351	2.01382	1.60714	1.17993	0	0	0	0	0	0
Adap1	0.00132131	5.84185	6.36469	4.41415	4.17781	5.97771	3.4536	3.68746	5.19514	2.61444	3.19505	2.00273	1.20202	0	0	0
Adap2	0.00494369	0	1.24884	2.15948	3.02066	2.62503	4.151	4.40735	5.56465	5.73758	7.83148	9.38041	4.63363	7.61794	4.88732	6.5566
Adar	0.206751	4.5121	7.31833	7.63799	4.64784	5.12695	6.41956	12.7381	6.96082	5.81761	4.75499	3.76118	3.21363	3.47213	4.99995	4.79902
Adarb1	0.248779	1.44724	0	0	0	0	0	0	1.23182	1.25625	1.27626	0	1.12801	1.34822	0	0
Adat1	0.00819837	3.25233	2.65234	2.69334	2.67752	2.12809	1.45206	1.56658	1.73937	1.07906	0	0	0	1.01689	1.01999	1.09739
Adat2	0.0323929	3.61325	4.38406	3.32037	2.52599	2.70613	2.09657	1.37406	2.44789	1.53983	1.7619	1.43009	1.85845	1.41178	1.11241	0
Adck1	0.244034	3.73241	3.98966	2.3142	2.74065	2.89965	2.44963	1.65911	3.42267	2.38892	3.71492	2.23912	3.42238	4.34218	4.75459	2.70483
Adck2	0.432571	8.29108	10.5631	8.12492	7.85239	9.33662	6.47497	8.38674	8.77742	8.02341	7.7402	9.18465	9.62151	9.4124	10.8032	7.75858
Adck5	0.078802	14.3032	16.8089	11.2428	10.7346	11.3042	11.695	15.848	18.1905	12.0561	14.0897	15.8224	16.145	18.2606	44.2605	21.0481
Adcy4	0.00468648	2.2979	1.71669	1.24958	1.55161	2.19044	1.92723	2.56503	3.09199	3.50634	3.96492	3.43167	2.8971	2.21715	1.45344	1.1983
Adcy5	4.15173e-08	0	0	0	0	0	0	0	1.12118	1.0631	1.40958	1.17254	0	0	0	0
Adcy6	0.0349023	15.0874	16.139	14.9604	15.9894	15.7986	15.4578	15.3521	19.876	14.097	12.0304	10.9058	17.152	6.84962	2.34034	2.26173
Adcy7	0.00838746	11.3759	10.1229	7.93093	8.92204	5.88494	2.94565	2.01297	4.12992	2.49151	2.93918	1.56371	0	0	0	0
Adcy9	0.0917831	0	1.28351	0	1.08067	0	0	0	0	0	1.24312	0	0	2.2669	2.61928	1.31697
Add1	0.00219556	60.3779	90.5146	56.0529	51.2577	105.999	77.016	79.6685	60.7105	28.2438	20.5012	23.6087	26.5663	7.87352	15.4827	9.92171
Add2	0.001244	76.5961	86.8221	79.3176	69.5732	76.6281	38.5907	22.7357	14.2246	23.6404	6.81236	5.17887	0	0	0	0
Add3	0.00124498	11.4863	11.7843	11.3556	10.5834	7.96044	9.22748	6.85608	4.78757	6.50313	7.62046	4.74416	5.26891	2.43171	0	0
Adh1	0.00155727	5.51893	3.96521	5.80094	17.1297	68.9239	257.54	519.874	203.324	226.559	361.572	372.146	699.022	1573.35	1253.99	799.298
Adh4	0.00657926	0	0	0	0	0	0	0	0	0	1.96454	2.45257	5.38483	20.3557	40.6723	54.1054
Adh5	0.015746	46.0003	45.8001	44.8333	56.5527	93.3217	115.555	106.699	91.2396	80.6717	102.684	139.283	132.984	153.659	140.828	124.881
Adh6-ps1	0.0645363	0	0	0	0	0	0	0	0	0	1.24469	1.84303	0	2.17463	22.1309	11.6826
Adh7	0.00659999	0	0	0	0	0	0	0	0	0	0	0	0	1.71024	1.53521	2.48557
Adhfe1	0.00149402	0	0	1.29664	2.64662	4.097	9.43263	10.644	11.3552	15.4189	23.1203	27.4471	31.7015	30.823	17.8552	21.9108
Adi1	0.00208467	15.4008	19.0441	15.4844	20.8356	27.1327	20.2821	23.0902	35.3901	47.5607	66.2088	59.3636	72.5797	47.1646	73.1228	38.3114
Adipor1	0.000353653	64.9198	90.1718	79.1657	88.3116	107.626	83.6203	62.3188	43.5185	46.0513	37.0323	29.301	30.4852	25.3737	28.4732	22.878
Adipor2	0.00428814	26.8099	29.1965	27.7513	28.3339	34.9281	34.0214	40.208	34.1647	38.14	52.3084	50.3294	54.1873	60.8696	105.711	69.3232
Adk	0.000756403	49.5932	38.1206	50.804	58.4745	56.4244	71.4876	78.7697	75.2083	90.6476	94.3503	111.371	140.948	267.007	160.073	207.095
Adm	0.20389	4.30391	1.52368	1.28818	1.1221	0	1.66513	3.5857	1.85236	4.11935	3.16998	2.93542	2.04933	2.25352	0	0
Adm2	0.0303865	1.52322	2.53882	1.3651	1.34215	1.01346	1.94429	4.90898	0	1.36433	0	1.16585	0	0	0	0
Adnp	0.00862382	23.0034	15.5448	19.356	17.8157	13.499	13.8009	9.44344	10.3177	10.7361	11.8978	9.5333	10.9251	6.08391	3.68496	4.26987
Adnp2	0.00602827	4.57345	4.38544	3.98081	3.23186	3.07007	2.54745	2.08636	1.87794	1.73222	1.60464	1.21421	2.09292	1.5572	0	1.26339
Ado	0.0965551	6.28647	6.42082	5.52135	4.98831	3.79863	3.45915	3.51209	3.8744	3.74401	3.78019	3.68856	3.5273	3.80832	3.57551	2.81768
Adora1	0.0979332	0	0	0	0	2.20138	3.52374	3.83133	5.064	4.57124	4.76758	5.29226	4.91474	8.09021	1.25668	0
Adora2a	0.0159768	3.63442	4.69525	1.9953	2.11096	3.09959	2.65665	2.68701	2.47825	3.06651	3.77489	3.2242	2.24069	1.47978	0	0
Adpgk	0.0052599	13.9162	12.9582	12.1088	14.577	18.5929	22.9008	20.0303	18.4664	13.2995	14.1665	11.0476	5.53083	7.60652	6.7817	5.37203
Adprh	0.00503827	38.6074	46.0753	30.2216	27.0198	33.1116	17.9365	15.4805	11.583	15.7122	13.3736	14.4638	6.75539	5.87865	9.88952	5.6678
Adprhl2	0.264148	23.2365	26.6083	20.2487	19.3463	19.7991	19.413	18.1478	25.3112	19.6358	22.9141	22.0474	30.3624	11.9542	11.1919	8.64276
Adprm	0.186604	6.3824	4.26931	3.86273	3.82136	3.48011	4.21767	5.33963	4.80932	4.26349	7.11571	4.55087	7.68029	6.85106	4.52766	5.41025
Adra1b	0.0129566	3.21232	5.83529	6.6015	10.9217	14.3479	13.6877	15.5371	6.70339	15.9235	18.9272	19.6371	12.9412	29.7959	44.2351	35.9195
Adra1d	0.20692	1.84635	1.59996	0	0	1.01058	0	0	0	0	0	0	0	0	0	0
Adra2a	0.374852	0	0	0	0	0	0	0	1.01408	0	0	0	4.78263	0	0	0
Adra2b	0.00948756	14.1256	12.4337	12.9691	9.03291	6.47012	4.24139	2.84391	1.83736	2.65581	3.03678	3.02068	1.85349	1.11839	0	0
Adrb1	0.669996	0	0	0	0	0	0	1.15324	1.11434	0	0	0	0	0	0	0
Adrb2	0.000194944	13.4883	13.6646	21.1363	20.8686	14.833	21.3752	15.7234	7.69838	8.95593	3.76488	4.72422	3.05805	1.66605	0	0
Adrb3	0.00109967	0	0	0	0	0	0	0	0	0	1.27099	1.32659	4.29806	3.69893	1.63768	2.25958
Adrm1	0.708849	58.2296	92.3196	46.468	40.2091	41.9644	26.0012	23.3972	62.9681	27.2103	25.7733	29.3278	28.8856	52.2444	45.7262	41.182
Adsl	0.043687	21.5858	22.9461	14.9243	12.071	11.2333	6.64471	6.01554	7.30024	7.7694	6.57811	7.33357	4.33519	5.1926	5.30175	3.80206
Adss	0.0617278	14.655	9.7321	11.7902	10.9282	6.79416	8.72241	6.50499	7.2563	6.70621	8.00273	7.32482	5.82189	5.56636	5.37742	7.69209
Adssl1	0.899159	3.56972	5.65471	4.98318	8.35608	11.3518	8.4489	9.93727	10.2216	7.50805	6.72949	5.47213	6.57375	10.9073	8.80186	6.4194
Adtrp	0.000126988	0	0	0	0	1.41555	3.9132	9.87638	33.0912	37.4439	55.8173	60.4896	63.9144	38.5449	49.9085	61.3611
Aebp1	0.00836342	6.1641	6.60616	4.68155	5.46483	6.20548	3.76766	1.88492	3.38756	4.82445	4.82855	2.83541	2.55588	1.29584	0	0
Aebp2	0.0067448	6.85019	4.65679	5.95565	5.33476	3.72855	5.92295	7.44808	2.62696	3.48413	4.3565	3.79224	4.44769	1.5447	0	1.24931
Aen	0.039092	18.2561	12.7835	11.0712	9.9056	6.64693	5.53293	5.18224	7.4149	6.53435	3.86381	3.47272	1.60065	4.10805	3.38003	3.02061
AF357399	0.0104014	2.93707	2.3291	2.99042	1.2662	1.77888	3.06471	1.33109	1.43914	1.43703	0	0	0	1.37647	0	0
Afap1l1	0.0509945	5.10658	2.75702	2.11044	2.71749	2.48938	1.97582	2.23296	3.08657	2.72764	3.34402	2.12624	2.06164	1.90802	0	0
Afap1l2	0.012408	0	1.13869	0	0	0	0	0	1.02776	1.55734	2.27328	2.20183	1.82877	0	0	0
Aff1	0.000773172	8.66785	8.75355	10.8282	11.3223	8.28155	7.55492	4.92701	4.18989	5.45519	3.29323	0	0	0	1.54248	0
Aff4	0.182745	3.37712	2.37251	3.55978	3.60661	1.97924	3.5298	2.67968	4.9444	3.87675	4.32298	3.46886	3.9848	3.9451	1.88891	4.90837
Afg3l1	0.836199	18.4806	22.7147	16.2255	17.0209	16.0929	10.6264	11.1451	13.6349	16.8764	15.2734	13.7831	14.3904	15.5607	18.603	11.376
Afg3l2	0.00534919	42.0596	37.2311	40.564	36.9075	34.4797	30.6615	24.2786	26.2663	27.0215	24.3335	25.1608	23.924	25.0663	18.5478	15.0549
Afm	0.00405542	7.31698	4.57552	11.5915	20.6969	18.7422	44.8146	38.5311	47.0358	136.056	147.082	128.834	122.079	111.967	67.0179	48.0532
Afmid	0.00453408	4.17476	6.63021	6.33971	8.33776	12.6117	11.5241	16.6522	22.592	31.9997	29.9243	38.1695	26.1294	53.1848	40.9608	18.3474
Afp	0.00315339	3449.49	2810.29	5215.61	7453.61	7520.47	10538	9234.28	7129.35	12419.4	10276.1	8549.36	2335.95	40.678	31.6584	33.4977
Aftph	0.157108	9.0777	3.4266	8.16764	7.21723	3.6939	6.06767	4.58894	5.50456	4.69696	4.32655	4.27342	3.86055	4.12343	2.036	4.57571
Aga	0.0398325	6.18425	4.68693	6.15876	7.32683	8.37791	8.08596	9.50887	8.82584	10.5605	12.9595	12.0172	13.0485	10.4065	7.66182	7.50992
Agap1	0.00133092	1.41081	1.44797	1.142	1.01125	1.43388	1.56047	1.20499	1.40488	1.23772	1.44527	1.40806	1.00263	0	0	0
Agap2	0.137704	1.39651	1.64924	1.40311	1.12936	1.50527	0	0	1.8555	0	0	1.13193	0	0	0	0
Agap3	0.00941543	19.9178	24.8933	18.6575	16.3105	16.324	13.7158	9.85436	11.8851	9.0078	8.92913	9.45069	8.91921	8.40484	9.42485	8.11995
Agbl3	0.375148	2.0644	1.91895	0	1.18552	0	0	0	1.63094	1.45077	1.15278	1.52775	3.03152	1.80058	0	1.35861
Agbl5	0.0165243	5.11107	4.40518	3.75568	3.41064	3.49183	3.31081	2.98347	3.45832	3.95851	2.9707	2.623	3.10401	2.08284	1.49196	1.38161
Ager	0.634064	1.16776	1.11074	1.17166	1.09456	0	1.53358	1.14563	2.54359	1.08892	0	0	1.97255	0	0	0
Agfg1	0.00118693	52.8705	35.7975	47.6762	47.841	36.7446	29.2037	14.7024	8.7253	13.548	8.38019	6.89429	3.38771	3.68941	2.46251	2.64057
Agfg2	0.0185276	25.3315	27.6439	25.8937	24.4867	24.9958	16.2119	15.6114	19.3582	19.4532	17.7103	18.5599	10.9081	20.3092	9.032	8.0002
Aggf1	0.00905423	20.4283	14.7557	19.4736	17.064	9.99884	11.6201	8.75694	8.67738	7.74067	7.33484	7.54488	6.65255	6.34916	4.52731	7.33859
Agk	0.0716576	7.58789	7.3738	7.16923	5.99824	4.5879	3.74418	3.86179	3.95161	4.79098	4.10839	4.46739	4.92915	3.88818	2.83334	1.4683
Agl	0.642199	3.11538	3.03662	2.17101	3.89672	6.29037	15.4863	8.40795	4.52406	5.8164	6.5628	6.41833	5.04163	5.85704	2.69101	2.19707
Agmat	0.000172152	9.67035	14.9999	11.9271	14.3463	18.9703	18.2734	30.3208	76.7715	77.969	99.6499	111.787	93.8691	137.142	115.305	73.3912
Agmo	0.00672039	2.12181	2.03228	2.93947	4.18661	2.47296	2.84444	4.33525	12.1675	12.0343	16.3068	12.2874	25.3839	15.2274	7.79353	7.57343
Ago1	0.0100146	6.97083	5.82641	5.0807	4.5631	4.66385	3.77368	3.50204	3.33261	2.93165	3.87682	2.73112	3.34398	2.76954	1.90522	1.74524
Ago2	0.00010974	15.6451	15.2136	16.2163	16.117	17.3859	14.3298	8.86054	6.24835	7.52132	4.32284	3.72168	2.27624	1.33576	0	1.01459
Ago4	0.33356	0	0	0	0	0	0	0	0	0	0	0	1.10684	0	0	0
Agpat1	0.00142222	32.5457	35.242	28.9007	21.2293	20.4728	17.8172	14.5292	11.7793	8.37617	7.09704	8.5291	4.59391	3.57856	3.03528	3.39712
Agpat2	0.00611967	12.0105	18.0668	16.1579	20.854	33.6976	31.0447	55.582	78.4366	84.4892	89.279	103.903	75.3887	77.7295	200.686	110.321
Agpat3	0.00516494	5.2629	12.6535	11.4832	15.3862	24.6142	24.4382	34.6387	66.7155	38.2964	53.1918	45.4154	68.2826	42.8221	39.4703	35.215
Agpat4	0.000215755	18.5778	23.4372	20.7043	18.2928	17.1493	15.8144	9.29162	5.75603	6.35313	2.06474	2.49728	1.58872	0	0	0
Agpat5	0.00179016	4.56972	3.83577	3.67344	2.90093	2.32771	2.93167	1.93998	2.10656	1.77487	1.17959	1.36727	0	1.37963	0	0
Agps	0.000416095	6.23868	5.22006	5.71074	5.05905	3.93348	4.12287	3.62204	3.09177	3.24729	2.72498	1.42089	1.15262	1.03303	0	0
Agrn	0.0219058	16.7053	16.453	12.3507	10.9953	9.07917	7.54522	9.02759	7.3502	8.97687	10.1248	8.31987	7.21035	5.42626	4.23727	4.75398
Agt	0.00212366	17.0336	34.6397	42.3981	80.787	185.401	173.723	236.574	511.567	804.828	831.584	879.567	1008.2	773.062	429.561	280.035
Agtpbp1	0.000915251	3.63517	2.28045	3.47455	2.8482	1.77498	1.63058	1.94497	0	0	0	1.30879	0	0	0	0
Agtr1a	0.00619829	2.2896	3.57798	5.24671	7.55929	10.8539	13.1035	17.7023	31.2431	21.0635	32.4506	28.7674	38.3799	28.9334	16.9684	14.0054
Agtrap	0.000346193	6.22401	8.41412	6.04452	5.70875	6.88938	6.11958	5.56473	4.91604	4.14112	4.63196	2.88168	2.53493	1.62144	1.34234	0
Agxt	0.000650831	3.15992	3.76801	3.47489	7.46196	13.3832	17.2149	39.8443	315.377	298.982	237.979	258.451	142.144	400.608	221.882	144.567
Agxt2	0.00104727	4.91187	4.89598	7.76551	11.4044	9.54173	16.575	15.8063	21.978	34.926	44.558	51.0708	54.605	55.0122	30.6475	41.4664
Ahctf1	0.0502797	17.0868	12.5881	16.9082	16.4436	9.5857	10.332	6.03881	11.1058	9.96072	7.68433	5.42082	8.56354	8.48838	2.52231	3.41319
Ahcy	0.007208	76.6285	95.3867	59.4605	77.1204	102.795	104.713	155.513	202.658	105.339	131.862	145.88	208.188	850.933	570.492	359.174
Ahcyl1	0.0227256	24.525	20.9454	23.3961	22.0689	18.5615	18.0325	16.3452	14.8211	16.2493	17.2665	17.5647	16.2999	16.0057	15.1855	16.7253
Ahcyl2	0.286152	3.52975	3.03139	4.12573	3.69888	2.86024	2.03514	0	0	1.87396	1.45891	1.16282	0	0	4.04019	2.84019
Ahdc1	0.0687696	1.02072	1.16036	0	1.18588	1.28344	0	0	0	0	0	0	0	0	0	0
Ahi1	0.000778443	3.56695	2.56668	3.73261	2.9946	2.4434	1.81814	1.59554	1.21217	1.03958	0	0	0	0	0	0
Ahnak	0.255782	1.25461	0	0	1.14464	1.53758	1.61853	1.45496	1.64505	1.66614	1.88627	1.41248	1.64915	1.45679	0	0
Ahr	0.041882	0	0	1.11474	1.94945	1.9329	2.69336	3.43564	2.0898	4.85073	7.76355	7.60312	4.61368	9.65626	1.7801	5.38017
Ahsa1	0.0344147	143.045	141.777	117.943	93.5724	80.272	63.3972	57.9119	53.5595	55.1921	48.8856	51.4221	47.4224	56.3389	68.9231	60.256
Ahsa2	0.121839	15.7806	9.48716	13.1051	13.3319	7.20261	11.5911	11.1598	8.46186	8.71029	8.51669	9.61264	9.43955	9.27395	6.46889	10.517
Ahsg	0.0103865	299.256	391.209	754.179	1698.95	4678.08	7542.36	13958.3	18121.2	20267.6	20562.7	19784.2	24660.4	13678.7	7008.55	4247.35
AI182371	0.000540036	2.89586	3.0822	7.79165	13.9166	17.0856	26.6629	31.1172	29.9308	40.4477	66.2112	59.3016	69.0832	84.4141	62.3653	91.5368
AI413582	0.0399115	7.32115	7.77986	5.47611	4.82	5.81524	5.49343	3.84246	5.27437	3.48391	3.69081	3.98991	4.75712	4.2572	2.30532	2.38238
AI467606	0.000305986	4.21302	5.47627	4.15619	4.31831	5.95735	5.27361	3.26467	3.99308	2.92525	1.64567	1.55849	0	0	0	0
AI480526	0.200459	6.30577	5.34928	5.66211	12.1852	5.27881	5.98256	3.75042	6.35244	4.31123	3.40614	3.3372	3.17863	4.61339	2.2263	5.07005
AI504432	0.635051	1.41398	0	0	0	0	0	0	0	0	0	0	0	0	0	0
AI507597	0.201741	0	0	0	0	0	0	1.89328	0	1.55749	1.55392	2.99489	1.93474	1.90882	0	0
AI597479	0.0483401	4.19122	3.10155	4.02837	2.81436	2.47956	2.00518	2.14129	2.15799	2.79901	2.22894	2.15404	2.01462	1.73191	1.38118	1.6796
AI606181	0.00124846	4.21577	4.34846	3.84183	4.40784	3.28141	4.64534	2.29753	2.9707	1.84025	1.43109	1.36107	1.66926	0	0	1.11561
AI661453	0.285077	0	1.28562	1.2617	2.19869	4.04939	3.41171	5.4684	4.18789	3.69108	4.11945	3.43895	3.29801	2.9661	8.31091	3.64568
AI662270	0.00187947	31.3015	55.8514	111.793	109.465	79.2043	92.043	78.6964	46.1198	33.1016	13.5313	14.3043	3.59467	2.1193	1.22819	2.17434
AI837181	0.53654	17.573	27.3661	17.0316	16.5045	20.8862	12.3013	13.5798	17.9196	14.4943	14.5163	13.8243	14.5617	13.4459	20.2997	13.4941
AI987944	0.51925	1.39442	0	1.10587	1.15406	0	1.65844	1.65121	1.59211	0	1.46873	1.20951	1.79872	2.69598	0	2.10614
Aida	0.00244265	12.8359	11.1567	13.2812	11.1334	7.33569	7.05014	5.87838	5.47463	6.07721	4.64804	4.30403	3.36946	2.701	1.27567	1.39263
Aif1	0.00732024	4.03934	2.93414	6.7107	8.64056	5.92767	8.4043	14.2935	17.6637	14.0942	16.0122	13.8567	10.3593	7.2264	5.66754	4.708
Aif1l	0.370376	1.42962	1.25212	0	0	0	0	0	0	0	0	0	0	0	0	0
Aifm1	0.14048	29.3258	19.6347	23.5249	24.8856	17.8744	22.1878	20.5934	20.4907	27.2359	33.4126	39.5878	32.9438	47.7418	23.2387	26.6184
Aifm2	0.00192469	1.78467	2.19802	1.49338	1.33561	3.49444	3.40415	3.78451	4.70104	4.63995	5.97232	7.08437	10.6897	10.9606	6.46555	5.94656
Aifm3	0.712349	0	0	0	0	4.40526	6.00668	9.17928	2.43031	2.57401	2.37055	2.23692	2.24268	2.01871	1.0243	0
Aig1	0.373149	3.93556	4.63668	5.89973	6.86439	5.66584	8.85896	7.4881	7.15651	9.77799	5.93631	8.26671	9.29552	7.41619	5.89101	5.99167
Aim2	0.0328447	2.63643	1.57261	3.3335	2.97442	1.56286	3.18823	2.61516	2.21219	2.08171	3.2535	2.09597	2.39955	1.0799	0	0
Aimp1	0.0172655	66.6887	56.8702	57.7924	43.6618	30.6481	34.4115	29.0327	31.7122	28.5302	22.0292	25.8233	25.4967	21.0891	16.4792	19.5932
Aimp2	0.0138775	35.1906	42.8509	29.0152	22.7537	22.1866	16.0671	11.5148	11.1397	12.0088	8.10879	10.3591	5.82625	6.95992	12.293	5.73334
Aip	0.0645415	12.1591	17.9932	10.807	11.6388	11.4897	10.0321	11.2618	9.49112	10.6908	8.81417	8.82764	7.59594	8.19229	10.1031	9.5969
Airn	0.429697	2.42728	0	1.05541	1.39379	0	1.40143	1.5754	1.72955	0	0	2.23488	1.2618	0	0	0
Ajuba	0.00209501	7.42895	6.48545	4.927	6.18378	7.44057	4.8842	5.02462	9.80071	7.54054	6.56067	6.23188	2.82987	2.38531	3.76554	1.85824
Ak1	0.374035	1.01283	1.2912	0	0	0	0	0	0	0	0	0	0	0	0	0
AK157302	5.24333e-05	6.94492	5.89351	6.91471	6.40121	6.67088	6.4291	4.47722	2.88849	2.94209	1.98487	2.12753	1.43291	1.46287	1.21119	0
Ak2	0.131764	108.424	127.549	95.0033	82.8924	73.8529	69.566	69.769	201.217	90.4219	180.816	199.786	262.889	98.7964	114.518	67.8937
Ak3	0.000141011	23.7122	25.6658	23.5075	22.0408	21.7965	26.4897	28.7189	25.235	31.3641	39.1855	37.0413	57.9555	67.7247	86.1174	61.3375
Ak3l2-ps	0.747136	0	0	0	0	1.52069	1.22003	0	0	1.22866	2.31742	0	2.77977	0	0	0
Ak4	0.631524	6.60309	4.49779	7.45353	9.70502	12.9353	14.9176	10.9984	14.4312	15.339	18.0136	8.9253	32.8118	3.35703	8.52309	6.08257
Akap1	0.0003061	11.0125	13.4466	9.65958	9.71198	10.5192	10.0147	13.1831	21.1732	14.8466	18.8005	16.2002	22.8866	19.0225	22.3944	20.8324
Akap10	0.000333673	4.31912	3.71485	4.68709	4.35226	3.37447	3.26054	2.8719	2.34663	2.2118	2.05934	1.90592	1.20361	1.30938	1.00259	0
Akap11	0.178181	4.35026	2.27649	4.48282	4.56766	2.33729	3.44952	2.36828	2.72099	3.15191	3.3907	2.80774	3.36743	2.66806	0	1.72842
Akap12	0.00171428	4.6459	2.89214	2.98415	2.95968	2.337	2.7023	3.02215	3.31084	3.04274	3.6904	2.26178	1.27385	1.15404	0	0
Akap13	0.000110158	1.48954	2.17999	1.39664	1.38809	1.40415	1.58722	2.02397	1.16457	1.53072	1.21153	1.06278	0	0	0	0
Akap7	0.00432796	6.81463	3.74219	6.97345	5.93504	3.80898	5.48703	2.95311	3.1105	2.12034	2.39973	2.60869	2.53342	1.40604	0	1.03878
Akap8	0.0187045	30.3483	17.9159	25.947	22.4272	12.1847	16.3736	13.3107	14.5067	11.3382	9.97893	11.667	11.993	8.98236	2.63776	7.23021
Akap8l	0.0511285	20.2982	14.6915	16.1407	18.287	14.1909	18.3751	16.1743	14.1957	10.9923	10.058	11.0915	18.0375	13.66	6.26142	12.0798
Akap9	0.479529	2.34328	0	2.89098	2.12538	1.26526	2.79269	2.00793	2.78553	2.97357	2.2826	1.91148	2.89441	2.01107	0	1.41656
Akip1	0.101265	22.5136	23.1616	24.3936	19.5036	11.278	12.6613	9.06152	10.9425	10.9128	10.3133	12.6423	12.4775	12.1269	11.2898	10.1127
Akirin1	0.114692	14.4407	13.1112	12.423	11.62	7.83996	7.65926	7.14729	9.20564	8.41347	8.34684	8.87622	5.26616	6.77145	6.69529	9.39841
Akirin2	0.000120647	37.3447	44.9501	44.7832	39.9422	43.8285	34.5241	28.2549	21.5303	18.5559	18.7584	19.6893	14.4197	11.2406	13.0304	10.9566
Akna	0.000493077	3.14896	2.78422	3.85141	3.39987	4.37258	4.57932	4.93935	4.57685	3.9815	3.44399	2.40112	1.05295	0	0	0
Akr1a1	0.011953	170.22	198.661	176.943	188.314	203.367	198.161	196.754	205.029	204.483	217.333	221.066	223.042	266.783	289.888	207.607
Akr1b10	0.0713891	4.00965	2.42979	2.48608	3.09083	2.07012	3.36458	5.01073	3.28957	4.85516	3.34907	3.96511	3.78338	2.14507	0	0
Akr1b3	0.0222167	26.0988	25.0429	21.5284	15.6256	14.0819	11.0669	11.9737	14.0506	12.0406	10.668	9.90996	6.87539	11.2534	6.18966	4.21593
Akr1b7	0.100474	1.43801	1.89793	3.56311	8.1135	6.6433	29.29	87.4591	86.8684	54.4837	53.9616	41.78	50.7058	10.0553	0	0
Akr1b8	0.00414031	5.48878	4.03369	4.29425	4.26319	3.76776	3.70212	4.63657	6.29386	5.30411	6.9089	6.40574	4.00401	4.10603	1.15284	1.21207
Akr1c12	0.000163777	6.45079	5.82015	11.0264	11.6524	9.47006	13.7678	17.8688	24.4266	18.1688	26.6217	22.6472	47.7481	38.4241	36.4396	32.6599
Akr1c13	0.00114551	15.0064	14.0074	19.8217	22.4878	22.5806	29.7983	25.3776	28.6854	22.1598	30.585	23.1772	42.7291	46.158	44.1545	35.1149
Akr1c14	0.0027089	0	0	0	2.35881	3.35658	11.7273	10.9586	13.05	25.8704	38.2549	40.9335	46.5202	64.3379	24.2934	32.6512
Akr1c18	0.0169556	0	0	0	0	0	0	3.0138	15.7486	39.8436	37.1387	39.3163	49.1293	34.3792	0	0
Akr1c19	0.21562	11.2033	10.2918	15.6879	20.8796	15.1017	17.5056	4.30669	6.80348	6.05343	10.2215	12.0075	12.5164	45.4886	16.592	12.0737
Akr1c20	0.0139142	0	0	0	0	0	2.61253	5.49604	4.35684	34.2835	53.3723	76.1205	70.1466	117.94	34.4117	30.4735
Akr1c6	0.000348159	1.55763	0	1.66119	1.75285	1.63358	5.9561	23.5824	20.2821	125.29	181.361	256.708	256.113	420.177	320.986	291.522
Akr1d1	0.0181344	0	0	0	3.76222	5.97521	11.5237	16.2997	20.388	28.6068	45.3367	50.148	43.1027	63.0504	15.845	11.7629
Akr1e1	0.022057	8.14419	6.47219	7.00247	8.02436	6.69308	8.91079	9.17221	6.79408	14.1465	16.5649	18.403	18.6973	13.2507	11.6828	11.392
Akr7a5	0.00855173	22.1687	37.8021	24.6419	30.6986	59.1417	51.2593	43.0696	98.5792	73.5703	71.3946	82.1612	79.6141	112.052	210.842	100.246
Akt1	0.0192752	58.0412	75.3765	50.3028	44.7573	49.0465	35.1535	30.4343	42.3915	34.0616	32.5848	29.3727	23.2578	23.6824	25.5695	20.4014
Akt1s1	0.551786	34.1867	39.6095	27.356	25.7335	32.9487	24.137	23.3764	34.4724	29.9751	33.6223	32.0686	28.2416	28.6623	45.3715	33.2918
Akt2	0.068195	31.6421	40.3647	24.7875	28.592	36.0517	21.7719	19.5488	20.4777	20.0648	19.3116	17.8357	19.5755	14.0891	26.0293	22.8883
Akt2-ps	0.492993	2.68215	3.78123	2.60433	2.50053	3.58831	1.54305	1.26164	1.9575	2.37758	2.14405	2.12305	1.85941	1.89877	1.75233	2.63805
Akt3	0.71366	1.31027	0	0	0	0	0	0	0	0	1.01327	0	0	0	0	0
Aktip	0.108393	5.29341	1.64063	3.47221	2.09198	2.79631	2.99615	3.50404	2.28186	2.69105	3.1153	3.03459	4.33338	4.98634	3.5646	4.36414
AL591209.1	0.00615163	1874.79	2149.51	1648.04	1375.83	1453.34	1095.2	1066.01	1207.64	903.604	650.629	740.475	710.939	712.748	721.27	514.279
AL593847.1	0.132635	1.26642	1.35149	1.47233	0	1.4339	1.75972	0	1.22857	0	1.82937	0	0	0	0	0
AL807249.1	0.0992432	18.3163	32.9421	25.4564	28.3695	62.4885	35.3087	42.422	54.3494	46.161	50.647	34.7046	53.7782	52.1924	76.9521	42.7162
Alad	0.00298364	324.976	442.49	349.426	325.698	359.187	230.754	125.166	111.259	114.203	78.6966	100.965	81.4658	110.114	131.047	64.7525
Alas1	0.00762992	6.44886	10.2273	9.89671	11.8179	12.7509	10.7097	12.4379	25.0306	13.4773	25.6264	40.6579	26.5365	42.0907	60.4814	94.8572
Alas2	0.000312392	372.842	432.957	442.135	506.613	655.842	440.362	305.182	170.473	188.562	73.6945	67.2278	15.9853	12.3045	76.5974	45.3543
Alb	0.0300376	2045.69	1148.78	4068.91	8048.9	7138.63	18626.4	28945.5	21915.4	25738.4	33319.5	31972.1	28072.3	31639.7	17040.1	13632.4
Alcam	0.282536	8.26974	2.61544	5.35085	6.78564	4.48696	8.36399	6.88025	6.23836	9.57775	11.5618	9.63099	11.9441	7.7891	2.42027	5.15316
Aldh16a1	0.00661945	13.6365	18.0805	12.3558	12.4902	13.9489	11.0304	10.9929	13.9999	13.052	14.0226	16.014	16.4018	20.8233	24.5007	19.6472
Aldh18a1	0.00613777	32.7355	42.9313	27.1493	20.1119	19.8504	12.0783	9.96001	5.67061	6.77595	4.59321	3.45749	1.82394	2.19963	0	1.41444
Aldh1a1	0.0296462	0	0	0	0	0	0	1.10601	2.13386	3.51776	2.99852	4.57485	4.67596	57.1081	294.777	349.863
Aldh1a2	0.634783	1.88093	0	0	0	0	0	0	0	0	0	0	0	0	0	0
Aldh1a7	0.00903235	0	0	0	1.09523	0	1.01703	0	1.32638	1.79781	2.68457	8.28528	2.74831	35.3181	49.218	74.8868
Aldh1b1	0.105249	22.3176	42.1198	39.4478	61.7397	93.317	75.447	35.5171	25.4176	88.3954	79.5636	96.4739	19.6078	44.9026	30.2822	13.8923
Aldh1l1	0.00207813	5.56493	11.882	10.8048	20.3428	38.811	33.2845	52.7083	83.4794	90.6608	107.761	127.995	133.497	526.011	432.291	283.103
Aldh2	0.000489346	49.8862	63.5581	52.643	63.3185	117.811	96.9751	121.971	106.086	131.211	173.572	175.718	271.656	373.253	562.426	391.835
Aldh3a2	0.0116139	9.89373	9.98962	12.0451	15.7197	19.8315	21.362	23.3622	56.55	35.7171	63.2084	52.4356	64.5932	37.2025	21.3309	10.805
Aldh3b1	0.0767421	1.36146	2.68978	2.85704	4.87609	7.43758	6.19816	7.87693	6.20659	5.66395	5.69921	4.95277	2.23835	2.01136	2.35928	2.23088
Aldh4a1	0.00392378	30.7827	36.0787	38.1495	56.4351	58.5201	54.0121	36.1758	69.732	108.722	104.642	136.094	129.623	129.514	112.927	58.9632
Aldh5a1	0.00351718	3.20461	3.53629	3.62005	4.44644	5.20501	4.39022	3.80752	4.40928	6.8977	7.86408	8.81362	8.31695	10.0135	7.77467	6.26493
Aldh6a1	0.000860857	5.95926	5.25413	8.38756	12.803	14.8941	22.6876	26.0109	39.4162	35.3571	56.234	44.8028	79.2005	83.57	47.8923	48.5743
Aldh7a1	0.0249134	24.1267	23.7975	25.6986	30.9038	56.11	51.9618	58.3002	46.431	56.7743	86.3044	92.0034	48.0566	91.6519	131.673	88.3601
Aldh8a1	0.000165435	3.75924	7.24355	11.1681	18.6114	20.5344	30.1905	33.1059	43.3108	59.8749	79.589	86.3413	84.5168	113.794	100.004	92.5084
Aldh9a1	0.00875307	45.5761	51.2834	47.4191	40.5664	45.5346	37.4961	27.6424	50.4573	51.4139	64.2316	66.2668	69.5237	59.842	73.5573	52.9672
Aldoa	0.0197228	295.531	346.065	195.579	129.829	150.761	116.086	136.819	111.451	77.1929	68.8356	86.8298	54.7088	47.8568	68.7117	45.9327
Aldob	0.000469697	46.8313	73.2541	121.885	190.586	257.559	449.914	731.517	1036.39	1073.67	1146.52	1397.32	1561.99	1309.69	1065.2	1004.6
Aldoc	0.888925	3.00804	3.34824	3.01135	4.70829	13.4458	13.7925	17.6627	10.8498	4.82197	6.09207	6.94994	6.91093	10.7135	6.53291	4.33601
Alg1	0.0184048	10.5347	10.8933	9.03703	9.20029	7.55779	7.62761	9.25772	12.8691	11.4551	10.7757	11.1508	9.36288	14.5493	14.7456	12.9148
Alg10b	0.0415914	5.29161	4.50335	4.27262	3.65016	2.84255	3.46495	1.45906	3.07491	3.9674	3.37037	2.98588	1.42677	1.68373	1.31204	2.55666
Alg11	0.421729	3.10352	1.97962	3.12631	2.67263	2.07458	2.99894	3.3484	3.1678	3.55964	3.43117	3.04294	3.92946	2.74482	1.88457	3.27843
Alg12	0.524807	5.1779	6.06485	4.4572	4.2046	4.2602	3.85892	3.15521	2.87541	4.97427	3.56239	3.91886	2.54733	3.51259	5.25616	3.90726
Alg13	0.141679	5.7728	3.1035	3.75696	3.82525	1.42967	2.19377	1.51538	1.99847	2.1426	1.46182	2.65209	2.01859	1.99829	0	1.28905
Alg14	0.0710639	9.31358	8.62672	9.57804	8.74414	5.1034	6.22592	8.5638	7.93329	10.9898	12.6044	13.1747	13.436	10.3868	10.0878	8.62332
Alg2	0.0236117	10.1383	9.85747	8.32159	7.76729	7.59265	6.03163	4.37539	4.65284	5.45288	5.24821	5.93761	3.10769	3.00873	5.32493	5.43103
Alg3	0.395616	18.2721	23.6348	12.1672	12.8016	13.1416	9.49165	9.04058	8.75264	11.0923	8.9037	10.2757	5.25974	11.515	18.5509	11.4569
Alg5	0.00030545	11.9562	9.59548	10.2892	9.17452	6.96402	7.91356	8.95154	14.1701	12.8876	13.9157	12.5574	15.8154	17.9164	19.1578	15.4919
Alg6	0.0386773	5.51916	2.10488	4.63879	4.96536	1.92433	2.26897	1.87997	0	1.777	2.71974	1.64979	1.35627	1.38716	0	0
Alg8	0.00277321	19.9235	15.4275	15.8487	17.3204	13.3692	12.9165	7.31987	6.21811	9.84944	9.36276	8.03633	4.68647	5.49553	4.62643	4.279
Alg9	0.0882898	13.9725	10.1849	11.8674	9.47163	4.98928	6.21626	4.41145	4.18057	4.11878	3.48238	4.62138	4.36998	6.86781	8.69791	4.08758
Alkbh1	0.00632134	6.69747	5.11878	6.56618	5.17317	4.03261	4.79095	4.63098	5.30053	4.02698	2.13659	3.87951	2.88799	2.48466	1.04818	2.44426
Alkbh2	0.371766	6.20126	7.31374	4.11422	3.7919	3.35867	5.81035	4.38663	5.52137	4.43206	5.60161	5.90061	7.08818	5.95086	5.85354	5.59534
Alkbh3	0.468497	11.5255	9.57498	8.42489	9.01394	8.30458	7.82805	7.38002	8.98966	7.62299	8.23279	8.1058	8.45929	10.5052	10.9185	7.9386
Alkbh4	0.00125307	7.26271	8.79494	9.42749	7.5053	6.56268	5.70237	5.1691	5.24213	4.38017	3.70568	3.50625	3.22727	2.30786	1.98834	2.72083
Alkbh5	0.00559879	21.7658	19.4933	19.3944	18.4551	16.4913	12.3294	11.5935	10.6124	11.4504	10.268	7.94663	9.31532	9.08789	9.43903	11.136
Alkbh6	0.0831043	7.05129	7.08922	5.29186	4.45208	6.08355	3.74164	6.20134	8.16412	5.09786	5.43282	7.81547	7.25895	8.20915	8.07825	7.6588
Alkbh7	0.272086	13.7831	18.3444	12.243	13.5086	14.2308	10.2368	10.7013	12.1057	10.4638	10.5023	12.2749	9.06357	17.5726	24.0584	14.1965
Alkbh8	0.0346965	7.57186	1.53094	5.20308	5.28745	1.75003	3.15332	1.7369	2.05147	2.1827	1.41904	1.45111	1.04494	0	0	0
Alms1	0.183766	1.40079	0	1.54764	1.36191	0	0	0	0	0	0	0	0	0	0	0
Alox12	0.00240544	15.6154	16.6367	10.4597	8.8784	14.0088	6.60905	7.86831	10.4664	6.17014	3.86014	3.62453	0	0	0	0
Alox5	0.00258312	2.58182	1.82317	1.83172	1.8657	4.04907	3.11596	4.09195	2.9358	2.61739	2.24499	1.27644	0	0	0	0
Alox5ap	0.0499544	13.0857	14.1018	16.4232	25.3202	46.0589	43.4148	40.7946	42.5207	20.7088	22.5374	15.5442	7.77985	6.75136	3.52138	4.52596
Alpk1	0.332221	0	0	0	0	0	0	0	0	0	0	0	0	0	0	1.83776
Alpl	0.0621897	3.15485	5.77785	5.1455	6.37081	8.79552	9.54861	6.46408	3.91353	9.16657	9.50896	9.94091	6.9182	2.10837	2.72648	0
Als2	0.0047376	5.35392	4.97528	4.9713	5.36384	5.41211	6.14288	5.91179	5.32507	8.43082	8.95519	7.81763	7.1729	10.0126	11.8812	8.90004
Als2cl	0.00498142	2.66695	2.9296	2.30761	2.81906	2.54294	2.96275	3.54061	6.61478	4.173	4.96099	6.61977	7.35882	5.0939	4.31374	4.05887
Alyref	0.00284426	44.9919	40.956	41.3708	34.6663	27.0572	21.8814	13.6034	14.2803	15.1468	10.0749	11.7118	5.8482	7.33607	3.44319	3.8292
Alyref2	5.72197e-05	2.68833	1.64285	2.29531	1.43857	2.13625	2.23228	2.94882	4.97458	5.32316	5.37852	5.50445	3.19896	2.73683	3.18208	2.63029
Amacr	0.000254541	5.79259	7.84084	8.96914	10.6253	12.2122	13.0219	16.4612	42.7309	40.0245	57.5922	57.351	69.4365	49.2541	57.5932	35.3253
Ambp	0.00185428	405.731	399.031	574.626	846.694	1044.15	1309.65	1575.17	1752.37	2042.08	2269.89	2371.93	2210.88	1840.33	3229.67	3121.88
Ambra1	0.0880819	7.08135	7.68979	6.21877	5.89457	6.45221	4.45617	4.30294	5.18288	5.01531	4.04143	1.47515	5.28777	3.70176	5.26161	3.27782
Amd-ps3	0.0195905	4.29969	2.34799	4.20233	3.20417	1.6828	1.95848	0	1.4125	1.17152	0	0	0	0	0	0
Amd-ps4	0.149993	3.091	0	3.06592	1.00233	0	1.09504	0	0	0	0	0	0	0	0	0
Amd1	0.00617673	50.1116	30.7836	46.8085	38.2467	21.7278	23.2105	16.5073	17.8606	15.8881	8.69097	10.1048	5.69423	7.75031	5.54653	6.05727
Amd2	0.00358301	7.90989	4.8942	7.66865	5.9422	3.34062	3.79834	2.5649	2.61506	2.22532	1.29131	1.40928	0	1.2139	0	0
Amdhd1	0.000217609	3.9502	6.45146	6.49633	10.4579	15.4528	14.2077	17.6906	44.5501	41.4822	53.4095	63.2692	71.3332	114.77	106.665	63.7228
Amdhd2	0.52621	9.14832	15.1114	11.0805	11.427	14.0788	11.2693	8.77975	11.3173	13.8018	11.9285	11.1313	11.7667	8.38856	12.8406	7.88999
Amer1	0.179967	1.89575	1.44362	1.40232	1.16848	0	0	0	1.12513	0	0	0	0	0	0	0
Amer2	0.00426411	0	0	0	0	0	0	0	1.24797	0	1.17273	1.32099	0	0	0	0
Amfr	0.0312335	48.7558	59.5014	53.7444	52.6656	60.7599	46.8136	43.3584	54.0739	55.4903	59.1055	52.2504	54.0666	64.8497	80.3783	72.8139
Amigo1	0.0254123	0	0	0	1.05808	0	0	2.51802	1.54977	1.46475	1.75398	1.89089	2.62714	2.02963	2.37611	1.32707
Amigo2	0.0700704	1.05759	0	1.06657	0	0	1.23138	1.34127	2.59967	2.15959	2.81797	3.00537	4.91008	1.94061	0	1.19536
Amigo3	0.000426082	5.69713	4.59168	5.32496	5.78758	5.43193	4.26385	2.89121	3.33314	3.91263	1.86349	2.15801	0	0	0	1.10061
Ammecr1	0.00191505	11.7121	10.2383	12.3686	11.6406	6.55578	5.50088	3.3062	2.25985	2.69621	1.78009	1.33939	0	0	0	0
Ammecr1l	0.0528308	8.12908	6.66682	6.61703	6.67077	5.88672	8.06205	7.26824	7.89352	8.23807	10.1301	9.96866	9.35609	9.97001	7.36433	6.99828
Amn	0.629696	0	1.68266	0	0	0	0	0	0	0	0	0	0	0	0	0
Amn1	0.47727	1.06128	0	0	1.16101	0	0	0	0	1.70251	0	0	1.16934	0	0	3.26945
Amot	0.00803592	4.64206	3.04358	4.58301	4.71218	3.3317	3.03988	3.051	2.40698	3.09239	3.20909	1.82636	2.93728	1.21193	0	0
Amotl1	0.00879783	3.36379	2.5763	2.36126	2.18301	2.10272	2.11568	2.24665	2.2196	1.7972	2.63456	1.76903	1.70655	1.45106	0	0
Amotl2	0.258923	6.77254	4.72301	3.28304	4.29317	5.16948	4.079	6.98153	5.88466	4.85811	8.19688	7.03248	5.94677	5.25085	4.47307	5.12623
Ampd2	0.000608031	43.6282	39.5111	37.2176	38.2331	59.7763	40.8259	23.2598	15.1317	13.6394	11.925	11.5946	8.13046	7.44394	10.4939	9.32729
Ampd3	0.00092385	9.67066	14.0936	9.96388	9.82504	13.2578	5.41819	8.29057	2.56451	7.19253	2.0311	1.16223	0	0	0	0
Amt	0.0365803	9.4237	9.13938	7.80881	10.6231	9.40819	10.3152	7.20418	4.70913	16.9137	26.7429	30.6417	23.5771	21.2743	18.5361	15.5203
Amy1	0.00294091	2.87695	1.28382	4.46255	8.29834	5.94941	21.2959	34.5279	60.8174	48.6769	70.1627	82.0904	85.8368	115.315	34.9015	58.0539
Amy2a1	0.466476	0	0	0	0	0	1.63277	1.12006	1.72575	0	0	0	0	9.7065	0	0
Amy2a2	0.466651	0	0	0	0	0	1.59884	1.23628	1.94545	0	0	0	0	10.33	0	0
Amy2a3	0.466147	0	0	0	0	0	3.04977	2.41874	3.36839	0	0	0	0	19.1569	0	0
Amy2a4	0.465976	0	0	0	0	0	1.79999	1.44117	2.06589	0	0	0	0	11.5183	0	0
Amy2a5	0.477898	0	0	0	0	0	2.67125	2.37602	3.73521	0	0	0	0	17.8155	0	0
Amy2b	0.443053	0	0	0	0	0	1.22409	0	1.14714	0	0	0	0	6.23203	0	0
Amz2	0.00768841	13.6872	12.2325	9.75881	8.73556	7.74159	7.24899	6.21676	5.80084	5.2555	5.12705	3.64986	5.02559	4.98622	3.48537	3.41323
Anapc1	0.0079952	24.3156	22.4536	15.9727	16.7603	15.6585	9.51185	7.54392	5.61941	8.29092	6.01072	3.58423	5.68808	4.6254	5.84515	4.97441
Anapc10	0.00270054	2.91618	2.81141	2.59691	2.42165	1.60081	1.2992	1.06803	0	1.22409	1.22459	1.16064	0	0	0	0
Anapc11	0.0225374	23.1521	45.7127	36.7958	32.8553	20.5173	17.6226	10.247	11.5739	16.9436	9.89041	15.7158	6.31788	8.01249	7.5479	6.65362
Anapc13	0.0721394	104.582	99.361	106.949	104.843	104.361	110.354	95.7745	104.114	112.936	98.9749	108.336	128.018	119.757	125.767	98.4618
Anapc15	0.0146863	12.257	12.6444	10.4057	7.96266	7.3796	7.8099	4.64115	5.11475	5.42559	5.42044	5.49999	4.29713	5.02577	3.35312	3.97095
Anapc15-ps	0.0755832	1.68421	2.09439	1.49809	0	0	1.35918	0	0	0	0	0	0	0	0	0
Anapc16	0.0518339	20.0694	14.8921	23.1464	20.8233	15.0199	13.0801	14.2902	13.6755	14.5922	12.3951	11.4864	13.4726	12.7885	11.6998	11.5565
Anapc2	0.0205573	31.0216	36.6195	29.9202	24.4976	25.6585	19.1073	16.0686	15.7053	17.5981	19.5196	15.9105	15.4944	13.6429	17.0733	14.2162
Anapc4	0.0423589	14.7673	12.2697	15.7952	13.5787	6.89785	10.4432	9.39867	10.5101	13.0331	14.7891	13.5634	11.6141	7.28055	3.87865	3.49411
Anapc5	0.0026249	149.446	192.481	148.976	130.714	132.612	88.8389	65.2449	62.3161	66.6676	51.7864	51.2799	43.9923	34.4	23.9168	16.5536
Anapc7	0.0138478	18.9834	23.1084	16.9603	16.6711	16.4356	11.3399	9.71828	11.3916	11.1523	9.96173	10.784	10.3651	7.76884	8.1981	5.29301
Ang	0.0248675	2.50769	2.25526	2.77414	4.21748	2.51051	3.11563	9.50357	23.2643	33.1462	32.7109	26.2671	71.7996	113.684	47.5105	302.683
Angel1	0.880585	1.29923	0	0	0	0	0	0	0	0	0	1.02824	0	0	1.50404	0
Angel2	0.00937923	6.9226	4.98701	6.88115	4.72902	4.18833	4.15187	4.10201	4.57568	3.99239	3.93698	3.04329	2.90788	2.58894	2.42057	2.22832
Angpt1	0.639546	1.60023	0	0	0	0	0	0	0	0	0	0	0	0	0	0
Angptl2	0.0407369	2.42227	1.31441	1.74319	1.0362	2.62649	3.25827	2.7974	3.75946	3.78553	4.89473	4.20027	5.24384	4.69798	2.36436	2.02676
Angptl3	0.0592169	11.0183	5.0561	23.1884	60.2578	44.7707	124.734	135.425	82.852	225.957	148.074	223.406	146.312	236.42	57.1761	107.864
Angptl4	0.029914	4.57235	7.08045	5.68571	6.12281	7.15453	8.84651	19.4058	33.2668	6.83363	14.0017	17.0987	30.8306	26.8471	12.4052	34.3909
Angptl6	0.119783	6.76116	10.5918	7.29312	7.58262	8.26198	7.73137	10.8001	14.9536	9.62462	12.4968	13.7401	13.054	12.9203	6.81576	3.97517
Angptl7	0.324459	0	0	0	0	0	0	0	1.02071	0	0	0	0	0	0	0
Ank	0.0316175	15.0526	15.075	18.7331	15.7618	13.6397	8.15739	6.33998	7.80768	10.8016	6.95888	5.30689	8.31793	6.97901	6.27373	5.38482
Ank1	0.00233825	65.8912	69.7967	55.3642	50.407	18.5027	37.3667	25.3681	10.3023	15.3202	8.82442	3.58532	0	0	0	0
Ank3	0.10193	2.5154	1.7024	1.72584	3.91756	2.95659	3.66877	3.85049	4.14017	2.8309	3.37798	3.26045	2.15232	3.24514	1.07261	0
Ankfy1	0.00131168	9.06037	9.38139	9.81013	8.13116	7.46955	5.73219	5.18545	5.14433	6.19441	5.88009	3.33291	2.41234	2.2331	1.9933	1.71032
Ankhd1	0.0200956	19.8477	16.1341	17.0052	23.971	11.9687	12.7682	16.2304	7.03264	13.0892	7.68562	11.7716	11.6178	12.3224	6.31055	9.20774
Ankib1	0.0711178	4.21772	3.07865	4.24289	3.24836	2.2705	2.23759	1.969	2.71845	2.89094	3.26617	3.07747	2.18497	2.10431	1.37805	1.72933
Ankle1	0.000523119	37.7646	25.9474	39.2534	40.78	26.5351	22.7503	19.0829	10.4501	14.204	7.33714	9.3011	3.28839	1.49158	0	0
Ankle2	0.016424	7.66149	5.78493	6.868	5.5256	4.32951	4.14256	3.77886	4.37555	3.8677	3.59267	3.07217	3.29541	3.01761	2.60995	2.68412
Ankmy2	0.106473	5.2314	6.40536	4.78076	4.18457	3.87516	3.49202	3.24697	3.52377	4.61643	4.58364	4.87033	4.38544	3.11894	2.25684	2.00711
Ankra2	0.131869	5.2808	3.82632	4.7037	4.9787	3.91504	3.93177	3.63597	4.65444	3.66478	3.2796	2.08602	4.25433	2.91735	1.99724	3.39989
Ankrd10	0.0016852	20.0149	16.8933	15.5363	12.5808	8.91127	11.9919	10.1151	9.54155	5.76484	5.03139	5.31385	3.61753	3.82253	0	1.61898
Ankrd11	0.0261238	15.2792	12.9917	14.8825	13.4429	8.70204	8.74455	10.8778	12.7775	8.92891	8.38997	8.58332	9.90213	6.72661	3.02515	5.17194
Ankrd12	0.306983	1.61852	0	1.42179	2.02515	1.0377	2.71002	1.85756	1.85071	0	1.5876	1.3778	2.09101	0	0	0
Ankrd13a	0.00152942	40.5081	49.8072	44.6257	35.2759	37.9237	24.9998	18.4648	20.291	20.0357	14.3937	12.442	7.12405	5.83964	5.41801	5.38689
Ankrd13b	0.231688	4.91988	5.69256	3.33508	2.42733	2.00242	1.86608	1.45386	2.12979	1.91233	1.77652	2.01138	3.56776	1.93187	0	0
Ankrd13c	0.0253468	10.5391	7.15658	10.2096	9.22429	6.10403	5.76919	4.66727	4.35891	5.35961	6.04281	5.63723	4.176	4.39353	3.31943	3.9011
Ankrd13d	0.665983	0	0	0	0	0	0	1.35147	1.32962	0	0	0	0	0	0	0
Ankrd16	0.194945	9.75179	3.36052	5.04035	7.7018	4.51057	7.34053	7.42698	12.8167	6.62341	7.91529	10.8159	7.76529	9.65857	1.23419	3.01905
Ankrd17	0.0104008	9.8719	6.02213	8.90631	8.17037	4.84047	6.33293	5.88194	7.132	6.04554	5.70223	4.68609	4.37653	3.43178	2.08609	2.64538
Ankrd2	0.332194	0	0	0	0	0	0	0	0	0	0	0	0	0	0	1.17655
Ankrd22	0.638868	0	0	0	0	0	0	1.11855	0	0	0	0	0	0	0	0
Ankrd23	0.122816	2.32096	1.68211	1.41845	1.66885	1.63295	3.36426	2.96675	1.86563	1.3461	1.15237	1.43262	1.25789	1.36288	0	1.94327
Ankrd24	0.782302	1.8728	1.10695	0	0	0	1.40706	2.31012	0	1.65081	1.04504	1.45758	2.29987	0	0	0
Ankrd26	0.0253994	2.76111	1.03034	3.14577	2.95051	0	1.44587	1.14983	1.11182	0	0	0	0	0	0	0
Ankrd27	0.00173036	16.7273	16.7557	14.9771	13.0748	12.3942	13.0128	14.6432	12.6867	9.71863	8.90457	7.20238	10.4228	6.10477	4.57332	4.49218
Ankrd28	0.171086	5.33297	3.5338	4.59854	4.6487	3.31325	3.53399	3.4132	4.83369	4.2056	4.17682	3.13178	3.45866	4.23242	2.06594	2.02665
Ankrd33b	0.0257774	0	0	0	0	0	0	0	0	0	1.21488	1.34709	0	1.49772	2.49088	3.37713
Ankrd37	0.247106	2.30457	1.61175	1.67742	1.13002	1.02312	3.5547	4.46628	0	1.88248	2.30004	3.56811	1.68204	1.26248	0	0
Ankrd39	0.448267	2.95862	3.50347	2.2901	2.55566	2.28417	1.59246	2.26332	2.24574	1.80869	2.20956	2.06784	1.59709	2.55935	2.31135	2.39331
Ankrd40	0.813756	15.382	16.8345	14.7549	14.489	13.2156	11.2864	10.0119	14.7726	13.5209	11.9828	11.3276	11.4418	13.1424	15.3875	12.5974
Ankrd44	0.0082894	0	0	0	1.10845	1.00067	1.08604	1.73058	2.08378	1.96369	1.55652	1.18521	0	0	0	0
Ankrd46	0.0707219	9.56879	7.2494	7.47856	8.37185	9.87391	10.2268	11.4179	9.49899	10.9345	15.4569	11.0112	12.699	9.79707	13.4065	12.64
Ankrd49	0.0330833	13.5556	7.19534	11.5216	10.3265	4.43389	5.15906	3.34226	5.47389	4.52615	4.25132	3.85168	2.66752	2.91732	1.11912	1.34078
Ankrd50	0.199586	5.18494	3.45006	3.12296	2.33358	2.54103	2.59027	3.5934	3.91229	3.44217	3.70278	3.72661	4.38695	2.24786	1.61731	0
Ankrd52	0.0321026	10.6762	18.66	12.4765	8.63627	9.64795	6.62568	4.44724	6.34081	7.59098	6.89638	4.63312	4.39015	3.5077	2.02501	2.28584
Ankrd54	0.00237769	21.8582	38.5086	22.3959	26.4271	27.5162	19.4921	10.3416	10.2408	8.15004	4.85191	5.0957	3.7395	4.79157	4.0679	3.55124
Ankrd55	0.439403	0	0	0	0	0	0	1.38285	3.97532	0	0	0	0	0	0	0
Ankrd61	0.0169537	1.20131	0	1.01815	1.30355	1.11985	0	1.01839	0	0	0	0	0	0	0	0
Ankrd9	0.000161296	23.3705	28.898	26.3052	24.5776	25.4685	19.6507	11.383	4.48124	5.76583	2.08038	2.2729	0	0	1.68947	1.55121
Anks1	0.00202691	4.66216	5.7281	4.24537	3.37077	4.61266	4.04434	4.16442	3.67732	3.4216	3.86065	3.15162	2.76267	1.80958	2.10371	2.47898
Anks3	0.0147573	6.52601	6.51634	6.17407	6.61655	7.08979	6.99074	5.76214	6.00926	5.75505	5.31966	6.5616	6.41745	4.3063	3.66025	4.32813
Anks4b	0.0057901	3.71903	2.99763	5.35907	6.99093	4.96069	9.13846	9.99577	8.11208	8.97667	9.93135	10.7505	12.0396	11.3065	12.6224	12.2098
Ankzf1	0.00910415	8.04938	7.23767	8.27843	7.21155	7.8049	8.45237	6.77496	6.2759	4.49514	4.39708	5.5545	7.13414	8.79104	5.68271	6.57171
Anln	0.00450177	14.0392	7.12912	14.9858	14.5459	7.42753	8.21327	4.42884	3.51386	5.73507	3.77801	3.01808	2.16614	0	0	0
Ano1	0.314427	2.01345	1.69566	1.67839	0	0	0	0	0	1.04336	0	0	0	0	0	0
Ano10	0.0129071	4.69844	6.60398	5.5752	5.62303	6.58317	6.0708	7.51457	8.1643	9.46639	10.467	6.88947	7.2064	6.08362	5.90041	5.1244
Ano6	0.00171661	6.5934	5.56722	5.13956	5.86034	6.42947	5.78667	6.14844	7.39805	6.79464	5.56848	4.5321	4.30068	2.58989	1.4261	1.41883
Ano8	0.469236	3.19635	2.5263	1.81192	2.18794	2.24471	2.37288	2.55508	2.65118	2.52944	2.35504	2.52457	2.08188	2.88158	1.74734	1.86934
Ano9	0.265218	0	0	0	0	1.21376	3.94767	2.53028	0	0	0	0	0	0	0	0
Anp32a	0.0552014	126.142	64.4913	105.554	91.0819	24.9051	79.0125	65.1782	50.6155	43.8791	40.1629	49.4902	40.5359	50.2223	26.758	36.5079
Anp32b	0.00146915	860.973	907.643	873.553	693.682	545.437	496.052	257.01	218.638	197.032	107.135	108.915	69.1018	56.6605	38.505	31.2348
Anp32b-ps1	0.0133733	19.3572	18.1222	20.048	1.0856	13.3334	11.4899	6.23405	4.67751	3.59577	2.04324	2.68519	1.94601	1.46263	0	0
Anp32e	0.000329276	74.2013	68.6997	70.7645	69.1453	51.2673	53.0723	33.5371	29.2927	22.5776	17.5599	12.7761	8.15188	7.12732	4.16446	4.90005
Anpep	0.00331407	12.8667	20.8074	16.4989	19.124	25.7232	17.3126	15.7436	23.4077	31.0461	37.0429	30.1095	30.513	27.9119	41.0271	33.4666
Antxr1	0.330117	1.17299	0	0	0	0	1.09268	0	1.2935	0	1.38751	0	0	0	0	0
Antxr2	0.0291747	2.32978	1.84414	2.68747	3.36351	3.05967	3.5836	2.60072	2.73053	5.64042	7.68487	6.72716	6.86486	4.70329	3.08866	4.41147
Anxa1	0.049557	4.37234	2.4929	7.12349	14.4651	19.4843	35.9856	37.8062	44.5059	23.5112	30.3133	16.3344	3.92356	3.90726	0	1.18571
Anxa11	0.675366	4.11831	5.64031	4.17456	4.06585	7.1432	5.09349	5.06811	5.83924	5.48919	6.46062	4.77541	4.67747	5.03831	6.93309	4.64305
Anxa13	0.327684	0	0	0	0	0	0	0	0	0	0	0	1.37382	0	0	0
Anxa2	0.0242976	28.4099	32.3396	31.0493	40.2931	62.6391	68.5475	66.7363	31.5866	40.5039	44.6824	45.8498	34.6394	10.9862	3.30672	3.387
Anxa3	0.0135678	6.95896	4.91555	6.51369	7.90326	7.86008	10.7538	9.67344	7.40324	8.45473	8.29594	7.61803	5.92358	4.9841	1.36746	1.70031
Anxa4	0.421845	11.9018	10.955	13.4213	16.8553	15.1734	18.8147	15.5279	14.5802	17.1294	21.7048	17.3143	32.5762	18.4625	15.1617	11.067
Anxa5	0.176001	28.9545	31.3648	27.9824	29.4356	30.1481	27.0044	35.0725	27.7412	38.7172	43.0247	42.4285	49.9081	32.0479	34.2334	28.0748
Anxa6	0.551181	37.7956	46.0035	35.3889	40.9282	58.1782	50.403	55.3421	39.4822	60.8337	60.6796	51.9967	47.2063	54.0472	61.5071	38.3382
Anxa7	0.0104235	34.3249	36.4057	33.1345	33.0141	28.4426	26.3058	20.9246	23.6055	19.4074	18.8401	19.9993	26.0788	18.4717	19.8945	18.5164
Anxa9	0.00068119	3.10687	2.81481	2.90376	2.31145	2.16903	1.89474	1.29254	1.4567	0	0	0	0	0	0	0
Aoah	0.0198102	0	0	0	0	1.67062	1.05785	1.57856	1.63939	1.59388	2.22585	1.03567	0	0	0	0
Aoc2	3.24466e-05	6.23903	5.68936	6.73986	6.03862	6.23411	5.8296	4.65435	3.501	3.0132	1.06323	1.53485	0	0	0	0
Aox1	0.00233502	0	0	0	0	0	0	0	0	0	1.38072	1.50204	1.24178	9.09187	10.5634	8.40262
Aox3	0.00808485	0	0	0	0	2.66431	8.92659	14.7697	6.80842	15.8407	19.6048	21.4609	22.1278	37.4109	104.315	61.6106
Ap1ar	0.0176043	20.5553	16.2182	19.1487	17.708	11.0718	9.74399	6.931	8.98449	8.72296	6.96273	6.37896	5.94494	5.78383	4.67811	7.79417
Ap1b1	0.00574692	47.4799	61.1327	51.072	44.5086	46.143	27.2386	24.1619	25.2942	26.3464	28.7255	27.1932	13.6832	15.8756	18.9577	13.1484
Ap1g1	0.0175438	10.1103	9.7819	8.85581	8.35099	9.47638	7.86582	6.1776	7.55731	9.33618	10.0502	7.2221	4.86578	6.60677	6.43702	5.07017
Ap1g2	0.00789691	14.1315	16.1083	11.6432	8.48429	10.1038	5.24858	5.98604	4.2511	4.61905	3.19522	2.98955	3.41276	3.30068	2.98982	2.9251
Ap1m1	0.00495557	33.6293	35.2832	25.7846	24.1749	32.5379	19.2058	19.5352	21.0186	20.5274	18.8498	14.3021	14.2516	11.8449	11.1885	9.20319
Ap1s1	0.00694394	74.6219	85.8165	66.3519	53.4488	53.8522	44.4185	43.9652	38.7463	41.8864	36.7648	38.9482	34.4435	27.8918	29.2085	20.0152
Ap1s2	0.0034734	2.40117	1.48058	2.45514	2.67566	1.79945	3.04583	2.03276	1.38267	2.1054	2.5694	2.14851	1.5097	0	0	0
Ap1s3	0.235454	1.64978	1.02516	1.18207	1.26278	0	0	0	1.06231	1.07419	0	0	0	0	0	0
Ap2a1	0.00322067	65.1064	91.9354	70.8246	60.9152	62.4887	34.9463	26.0204	21.2683	22.6372	16.5783	15.0926	9.71965	11.9444	13.2166	11.6151
Ap2a2	0.00299363	49.3468	61.2239	50.537	48.9999	54.1864	34.7079	28.8075	23.7048	35.4387	29.759	27.0029	17.1248	16.0603	24.8073	16.6912
Ap2b1	0.00258017	13.6403	17.1514	12.977	12.1044	17.4529	14.7562	9.22491	6.83671	7.62287	7.06276	8.48221	6.82237	8.50834	8.90323	7.58947
Ap2m1	0.0673763	86.0086	132.117	97.0085	115.678	101.125	70.0723	61.0332	61.1446	77.7428	66.09	61.1332	54.7412	65.3516	83.3106	57.8757
Ap2s1	0.00671626	139.914	198.519	141.957	131.429	137.643	115.719	101.367	97.5488	91.1353	72.7436	86.4839	67.9501	75.3585	98.0831	62.7665
Ap3b1	0.0588029	12.9498	11.6427	12.4908	10.9596	10.0762	8.83263	8.27893	8.77387	9.43424	10.4489	8.72798	9.88887	7.34835	7.63995	7.1781
Ap3d1	0.0117679	21.9523	22.225	19.3164	18.4319	18.1022	15.6786	13.8594	16.4557	15.5164	13.3676	13.5722	12.7471	11.0128	13.2176	13.1882
Ap3m1	0.650984	12.812	8.00343	10.4783	10.0001	7.19435	8.79553	8.23798	8.78252	8.33675	8.1704	8.89615	6.4036	11.3833	4.69285	10.0763
Ap3m2	0.0640379	0	0	0	0	0	0	0	1.08336	1.23101	0	0	0	0	0	0
Ap3s1	0.0035176	19.5077	18.8006	20.511	18.7647	16.6465	15.586	13.9345	13.7747	13.1377	10.7191	12.7171	12.2381	9.64462	10.8217	14.1082
Ap3s1-ps1	0.138853	4.52924	4.53847	3.76137	3.51673	2.60001	2.56743	1.99164	1.61786	2.50059	2.35794	1.178	3.9337	0	1.28099	2.62463
Ap3s2	0.064124	6.41871	7.76794	5.71035	4.64794	4.8669	3.98006	4.08757	3.81014	3.85795	3.48795	3.43994	3.63418	3.64633	4.77373	3.97756
Ap4b1	0.000224945	10.9008	8.63891	10.6204	10.3997	10.258	10.4121	8.83656	8.10628	6.60375	5.3763	5.61078	5.14486	5.76458	3.9981	3.80726
Ap4e1	0.019805	2.33149	1.57664	2.2164	1.97133	1.31862	0	1.60867	1.17807	1.46617	0	0	0	0	0	0
Ap4m1	0.00499298	5.27485	5.78378	8.08368	5.29181	4.98262	3.48062	4.34268	3.22727	3.06459	2.92679	2.71607	3.16262	2.17181	1.89565	1.98237
Ap4s1	0.366867	11.7413	6.92749	8.31469	7.39476	6.58439	7.12894	5.76514	7.75522	5.77299	5.34189	6.44435	5.73708	8.69746	5.11283	5.45012
Ap5b1	0.0122314	1.65497	2.07136	1.61745	1.77101	2.806	1.25887	1.73478	2.1088	1.77787	1.58583	1.36803	0	0	1.67714	0
Ap5m1	0.118026	2.91296	1.96747	3.1475	2.58503	1.77668	1.95165	1.72944	2.23361	1.68949	1.85669	1.73643	1.95491	1.90217	0	1.40875
Ap5s1	0.673207	12.7167	9.9381	13.3042	11.0281	13.8646	16.0701	14.7011	17.4861	12.1589	12.0954	13.8934	11.605	14.6608	16.2522	14.7765
Ap5z1	0.00450146	4.12514	4.43279	4.05359	3.39643	4.01338	3.4486	3.59376	3.56632	2.52405	2.77702	3.01967	3.08871	2.7286	2.85448	2.78394
Apaf1	0.00119256	4.59795	2.52456	4.09662	3.54475	2.7458	2.4058	2.59157	2.39947	1.99572	1.58776	1.40729	1.17221	0	0	0
Apba3	0.0795932	14.122	19.1518	11.9277	12.1223	14.6589	12.6723	12.5595	13.7097	10.7564	11.5191	13.74	12.8138	15.5596	30.5091	22.8787
Apbb1	0.0320418	1.84729	2.38874	1.35011	1.09153	1.15732	0	0	0	0	0	0	0	0	0	0
Apbb1ip	0.000710234	10.7976	14.5592	13.8588	11.9313	12.991	7.01016	6.66006	6.92937	6.09895	4.51595	3.39839	1.55802	0	0	0
Apbb2	0.332167	0	0	0	0	0	0	0	0	0	0	0	1.45184	0	0	0
Apbb3	0.675266	7.16322	5.58798	5.88169	5.8455	5.18852	10.6718	9.21232	7.87557	4.59171	5.32552	7.10784	7.86641	7.98717	3.22299	4.8206
Apc	0.760139	1.01132	0	0	0	0	0	0	0	1.71216	0	0	0	1.20199	0	0
Apcs	0.0476733	4.17129	3.90224	10.3672	28.577	31.9748	114.201	479.763	551.184	641.232	302.878	321.734	206.228	350.684	129.467	667.197
Apeh	0.00156961	109.974	125.198	105.919	96.802	98.3644	62.5562	47.12	32.1295	41.6312	29.7394	27.5989	25.6452	22.3645	29.4296	22.8805
Apex1	0.0219771	53.0147	55.7397	41.699	31.2638	28.1002	25.0482	24.3665	27.6326	15.0444	17.0404	13.1595	13.1044	19.5815	20.1497	15.7932
Apex2	0.000817746	7.52712	11.1644	6.48622	10.4971	7.93675	7.18979	6.10058	3.39631	3.15402	2.11935	3.93602	0	1.64047	2.28927	3.17516
Aph1a	0.792163	25.6166	32.4162	21.2313	22.5171	25.2127	19.0208	17.3605	22.5425	21.0908	23.6281	23.9681	20.2891	25.9762	34.4175	19.9722
Aph1b	0.548963	0	0	0	0	0	0	1.04974	1.38755	1.00953	0	0	0	1.57852	0	0
Api5	0.00974473	34.4456	24.7176	32.8041	28.6978	18.4785	17.5159	12.5874	14.394	15.0889	12.7532	11.4665	9.20649	9.96714	7.57386	8.82107
Apip	0.0443451	19.6495	16.4798	23.1916	18.6458	13.0527	13.2985	11.0477	9.18216	12.9775	10.6588	12.4522	8.74593	9.83554	10.2518	13.5703
Aplf	0.000502622	7.92729	7.07957	8.73886	7.6683	4.87754	5.50497	3.19866	2.19627	2.31375	1.57894	1.09353	0	0	0	0
Aplnr	0.27651	1.89488	1.89308	0	0	1.03904	0	0	1.21517	1.09056	1.10447	0	0	0	0	0
Aplp1	0.0255222	3.738	4.53076	3.1131	3.77985	3.77656	2.07763	1.71447	1.19611	3.88704	3.97594	3.48315	2.75795	0	0	0
Aplp2	0.370118	72.1707	89.577	84.1156	82.5659	83.6052	68.2163	63.5806	58.8402	73.1182	94.5056	72.725	87.6308	62.9229	64.6289	40.7855
Apmap	0.018979	13.7379	12.1154	16.1737	16.2587	12.3611	16.9822	14.0155	18.0521	17.8817	17.1235	19.2452	14.4193	15.1677	12.6848	9.19441
Apoa1	0.00697755	947.428	1484	1664.48	2830.36	5384.96	6375.31	10073.1	14877.4	11202.2	12913.9	11195.5	15918.3	9775.97	11396	6478.61
Apoa2	0.000326617	966.222	1199.7	1755	2597.01	3510.19	4533.61	5122.97	7394.87	7913.73	8238.78	9111.15	10878.5	11645.7	15236.3	9265.03
Apoa4	0.18209	3.04332	1.16625	0	0	1.03178	1.17996	5.20648	963.947	199.77	116.178	65.3448	699.776	66.0901	90.2984	112.751
Apoa5	0.000207851	2.58485	0	1.6338	0	1.08646	1.58827	31.9067	340.267	115.607	187.343	112.9	457.911	516.448	331.452	330.51
Apob	0.0023708	19.897	6.71269	27.5049	45.1551	35.6986	60.874	79.9436	131.622	151.171	209.563	181.986	247.207	162.876	75.2389	211.625
Apobec1	0.000518951	1.17007	1.10498	1.6161	2.45405	1.97961	3.83096	3.75886	6.5741	6.10164	6.47189	6.4968	8.35714	5.47063	5.72269	7.99229
Apobec3	0.000570681	21.163	25.0945	17.8931	17.3011	16.0327	11.7093	14.9529	13.7952	9.8414	6.31642	5.86043	2.48497	1.03739	0	0
Apobr	0.0180868	0	0	1.01794	1.15848	2.76999	2.37669	3.54613	3.5661	2.80342	3.00567	1.93537	0	0	0	0
Apoc1	0.000164368	96.802	112.885	144.874	270.981	549.411	837.75	994.869	1511.09	2125.37	2452.37	3274.39	3768.89	4910.87	5447.09	3317.82
Apoc2	0.149736	168.213	291.053	341.046	405.387	704.695	645.735	544.245	990.054	637.297	545.811	608.221	619.185	382.264	482.308	279.246
Apoc3	0.00340078	4.44991	6.42853	5.39478	7.16402	11.447	18.2286	167.375	152.079	115.074	142.411	283.728	295.733	2588.43	3574.74	2507.17
Apoc4	0.000584554	19.3796	42.0802	65.9429	114.569	254.118	396.005	813.449	1491.31	1235.56	1106.32	1292.65	1497.09	1616.83	1819.62	905.265
Apoe	0.000118951	791.284	837.44	1107.36	1442	2670.39	3613.24	5844.79	10746.7	12833.2	12492.8	12620.7	20713.8	17388.5	21799.2	12252
Apof	0.000371426	13.8455	16.5183	31.1087	55.9091	99.026	167.839	328.706	432.154	400.628	441.11	522.628	478.525	502.542	464.189	456.697
Apoh	0.133824	41.1833	60.4626	173.341	276.952	532.729	216.22	586.826	368.725	1012.33	373.491	542.93	426.034	1259.7	690.331	370.76
Apol10b	0.327658	0	0	0	0	0	0	0	0	0	0	0	0	0	0	4.63131
Apol11b	0.0711378	3.97681	3.61614	5.58938	3.7923	1.41205	2.1073	2.09565	0	10.3095	4.10681	4.09349	0	0	0	0
Apol7a	0.000642541	0	0	0	1.15246	3.87082	7.91328	9.35887	11.4281	15.2213	23.7424	22.5777	21.2056	23.2593	26.337	17.2028
Apol8	0.000778148	47.7393	41.8646	51.9465	46.7008	38.2055	28.3041	16.9581	11.0601	20.067	5.66922	4.45065	0	0	0	0
Apol9a	0.033615	0	0	0	0	0	0	0	0	1.45368	2.66294	2.92953	5.13915	11.019	87.016	52.5837
Apol9b	0.0253855	0	0	0	0	0	0	0	1.69762	2.27777	4.58239	6.85757	9.5968	22.8824	123.997	67.5552
Apold1	0.0060187	1.36239	1.25516	1.90616	1.65033	1.42017	1.60381	1.51047	1.0288	2.0748	2.36716	1.49725	1.2852	0	0	0
Apom	0.233977	215.286	284.376	300.885	374.935	483.546	449.764	368.89	563.23	541.11	551.886	308.903	545.001	396.85	290.126	209.347
Apon	0.00805395	1.14501	1.12421	1.30693	1.42907	2.34853	2.68103	11.2536	21.2067	18.0831	25.6867	33.0644	33.0486	137.7	329.975	345.817
Apoo	0.575873	15.9405	13.9806	18.9637	13.6069	10.898	11.7514	7.74596	9.62859	11.7535	10.678	12.5605	9.80861	16.1057	11.9597	13.8011
Apoo-ps	0.574566	2.46951	2.06156	1.71854	1.10556	0	1.11921	1.38405	1.07922	1.12447	0	1.25714	0	1.91082	1.54279	2.24045
Apool	0.709015	10.4788	5.4455	10.1111	8.53459	5.62201	7.96453	9.2629	7.33274	7.15196	8.93892	11.2803	13.774	11.5272	5.3823	7.74271
Apopt1	0.509318	17.9127	16.9943	15.3163	11.8669	11.806	10.7018	9.40936	14.2313	11.0221	11.6784	12.7286	11.6	13.8415	11.5109	8.03926
App	0.0072858	16.4	14.5618	12.7876	14.0507	15.218	12.5556	16.0376	27.8632	37.2457	40.7125	38.1108	38.981	29.7619	12.8479	10.8888
Appbp2	0.00631474	9.59281	6.43146	8.01245	7.84785	5.10381	5.21608	4.40929	4.20982	4.70312	4.36369	4.22196	3.19969	2.86136	2.04776	2.67641
Appl1	0.432394	1.7859	0	1.8931	1.83274	1.16142	1.8171	1.75046	1.45929	1.78711	2.26534	2.10685	1.8403	1.79437	0	1.28075
Appl2	0.792487	5.21053	3.5091	5.24855	5.22019	5.60133	9.98581	12.4412	7.35396	8.12204	8.68114	8.21751	14.1575	6.37423	2.26127	2.89893
Aprt	0.00134889	137.861	180.465	113.724	115.479	146.592	130.878	102.629	104.241	85.0338	70.7336	99.2713	47.2487	66.6333	49.5894	29.104
Aptx	0.0249741	2.50732	2.13571	2.1425	3.05552	1.58877	1.67121	1.91953	2.46205	3.93975	4.50414	4.6462	3.39546	1.87339	0	1.26933
Aqp1	0.0076531	24.5803	43.6896	51.0364	57.8521	64.0058	60.6946	62.7667	118.359	123.502	70.3649	53.2027	33.115	28.3674	26.93	11.1657
Aqp11	0.688954	8.38837	11.163	9.54545	14.6835	28.9164	37.2198	37.4599	24.1394	15.9709	17.9157	18.7172	14.8839	14.8429	19.2528	13.3798
Aqp3	0.00679369	14.7173	13.3454	12.0687	13.2346	12.5459	5.47169	2.17967	6.2803	1.08933	1.07799	0	3.46476	0	0	0
Aqp4	0.252982	0	0	0	0	0	0	0	0	0	3.32304	2.33513	3.45559	0	0	0
Aqp7	0.176847	0	0	0	0	0	0	0	0	1.11951	1.43032	1.59001	2.80064	0	0	0
Aqp8	0.594171	1.58148	2.03275	3.26235	10.6004	98.802	210.078	164.406	9.91646	25.4509	32.5953	45.2594	5.62201	27.8182	91.945	17.8225
Aqp9	0.00146518	6.09775	5.94286	5.48137	6.66962	3.5549	6.8436	34.6691	42.4701	36.5582	100.309	47.3539	68.5548	62.9039	91.1569	78.4911
Aqr	0.0113282	16.456	15.852	13.3081	11.1474	9.26333	6.33289	4.14574	4.75583	5.7135	5.16218	3.67379	2.847	2.38999	2.8429	2.8022
Araf	0.083544	16.1611	21.5101	19.0305	18.4432	19.4098	17.1741	18.3914	23.0103	17.0062	19.7025	16.7843	21.3976	25.4909	25.073	18.8697
Arap1	0.12064	9.71901	10.4714	7.4506	7.3259	10.4959	3.90741	5.25531	9.01603	9.54368	7.63596	9.21623	8.2328	4.37738	4.60447	3.75438
Arap2	0.0225691	0	0	0	0	0	0	1.54596	1.92811	1.58531	1.66037	1.52778	1.45895	1.71198	0	0
Arap3	0.00239559	8.57802	7.81402	6.18074	5.95404	5.9199	5.73202	6.96814	5.87182	5.68043	6.11916	5.5414	4.74168	3.54132	1.80533	1.98531
Arcn1	0.0277736	41.0568	29.3352	38.9048	37.885	30.7337	34.639	27.7933	29.0648	32.956	33.9479	28.7966	27.6877	26.1196	19.6112	25.8817
Arel1	0.000601638	12.6138	13.0948	14.5597	14.7634	11.6357	10.9542	7.77672	6.50463	7.3099	6.74753	5.33686	4.06999	3.46941	5.2219	4.95924
Arf1	0.0262442	183.958	193.706	158.121	148.897	163.096	145.087	147.958	140.979	153.415	147.136	146.759	129.4	133.155	142.511	110.794
Arf2	0.0175962	12.6438	6.98244	11.0435	10.4904	6.17486	7.17361	7.22425	9.74222	9.21172	9.63893	10.2468	6.37395	5.70589	3.96568	3.07078
Arf3	0.130713	24.8179	26.0804	19.102	20.7835	23.6396	17.7025	18.4867	20.3866	21.6007	22.9685	19.092	23.1478	14.4299	15.9312	12.5601
Arf4	0.0612824	56.5587	62.7461	48.05	50.0916	53.6256	55.2391	51.8226	69.3306	52.6162	60.6339	62.8533	60.7777	37.938	47.5554	37.0525
Arf5	0.000522912	220.406	297.368	243.774	249.224	269.281	213.683	141.936	118.523	108.121	65.0685	81.2834	58.7231	67.2713	101.04	58.4919
Arf6	0.000340713	49.9427	43.4499	43.1762	40.2406	35.3324	37.8658	30.0659	25.9929	24.645	24.9232	25.2764	18.32	17.9912	10.409	11.4409
Arfgap1	0.0528277	19.8398	16.4836	11.3979	11.7434	11.5159	9.66969	12.8997	8.88082	10.6038	8.8271	10.3004	8.56874	10.5737	8.46277	7.34178
Arfgap2	0.266401	34.7542	39.257	30.9825	34.2416	37.931	26.2075	28.4154	36.8024	37.485	39.6508	37.6896	32.4578	37.2017	38.4153	29.2186
Arfgap3	0.000276745	7.86172	8.89322	8.39607	7.59059	9.7516	7.97082	6.83466	4.49618	6.65695	4.92253	5.29957	3.69416	2.96034	4.05726	4.14616
Arfgef1	0.323881	7.56502	3.18374	6.97302	6.77445	3.36846	5.41873	5.53229	6.18052	5.05568	5.12958	3.55894	4.79524	4.5402	1.71066	4.50116
Arfgef2	0.0184247	7.53836	7.70858	8.01973	7.03618	5.95102	4.94432	4.35082	5.75262	5.41244	5.10104	4.76277	3.19816	4.96743	3.15253	3.858
Arfip1	0.0655506	6.28711	6.58283	7.24951	7.21984	5.20213	7.20509	6.32984	7.26993	7.85147	7.03902	7.07173	6.64607	6.41541	4.86368	5.57526
Arfip2	0.0645596	8.69498	7.41258	8.10011	6.84282	7.49221	3.24022	4.80882	4.39944	4.94868	3.42873	4.15818	4.10554	3.44976	5.00032	5.65996
Arfrp1	0.0167929	12.1878	10.9724	10.6391	9.94022	7.12421	7.40328	6.93202	7.4933	5.54185	5.7115	6.03444	7.48753	5.29874	4.94297	4.11486
Arg1	0.00679001	3.94436	4.29631	7.85867	31.2444	70.98	150.512	238.611	333.966	190.516	142.299	175.721	148.576	1035.35	655.643	832.433
Arglu1	0.00795204	55.3132	38.3767	52.5655	42.7172	28.6469	36.3725	26.8448	34.1155	28.1478	24.1734	23.559	20.9204	20.4297	9.42206	13.24
Arhgap1	0.00075886	13.1602	14.5125	14.6201	15.8592	11.5193	10.7351	8.86068	10.1192	10.2707	6.22546	6.0343	3.80577	3.55246	2.80823	3.20711
Arhgap10	0.000266488	7.47556	6.86414	5.70593	5.01514	5.39441	4.80116	4.29784	3.11091	3.12826	2.10302	2.29931	1.88119	0	0	0
Arhgap11a	0.00355315	20.0948	10.6309	19.4736	20.0246	10.912	11.6465	7.15539	7.90333	7.98752	7.21221	6.05853	3.93663	1.54432	0	0
Arhgap12	0.717039	3.07318	1.00043	2.42603	3.65114	1.78241	3.25233	2.71162	2.41023	1.80876	3.91151	2.82478	3.14249	3.16999	0	2.1039
Arhgap15	0.0691445	1.34041	0	1.59326	1.08462	1.05726	1.43445	1.53627	2.02346	1.34621	0	0	0	0	0	0
Arhgap17	0.00118352	10.9081	10.6895	9.97573	10.0079	9.07333	6.94025	5.7042	6.15383	6.35989	5.5383	4.33937	3.90644	2.83031	2.88947	2.15328
Arhgap18	0.0666791	3.64194	1.43557	4.00055	4.21982	2.23007	3.12875	3.12734	3.66809	4.59768	4.79961	3.48822	4.14038	1.75616	1.01675	0
Arhgap19	0.00170851	21.4046	21.3616	25.2225	20.4016	18.085	11.7035	8.01124	12.1204	8.86415	5.66105	4.70266	1.92726	1.46998	0	0
Arhgap21	0.0160295	10.2929	8.50234	12.0519	10.5237	7.62833	5.45588	5.39807	6.287	5.63521	5.70791	3.99039	6.40559	3.1409	1.78464	1.8806
Arhgap23	0.00140101	27.8409	36.008	33.1856	19.685	25.5215	14.8912	18.2876	12.8163	6.74534	10.0682	9.46475	6.14071	4.19189	1.95161	1.13682
Arhgap24	0.105188	1.70141	0	0	1.89531	1.49361	1.68111	2.13364	2.43252	3.09128	3.20222	3.22276	3.39159	2.52373	0	0
Arhgap25	0.00303482	2.26237	2.1114	2.2751	2.67939	3.38779	3.26513	3.91962	3.62998	3.19215	2.89041	2.49505	1.73352	1.15069	0	0
Arhgap26	0.638822	0	0	0	1.03589	0	0	0	0	0	0	0	0	0	0	0
Arhgap27	0.00169144	3.13564	2.98393	1.89264	2.58689	3.64655	3.51573	4.03628	5.01186	2.60274	2.63399	3.23844	1.2056	0	0	0
Arhgap28	0.634739	1.92869	0	0	0	0	0	0	0	0	0	0	0	0	0	0
Arhgap29	0.0140818	3.10917	0	1.35694	3.11579	0	2.43401	2.48672	4.04811	6.41085	8.4122	6.37952	3.90502	7.72743	1.56069	4.87641
Arhgap30	0.00108264	2.96845	3.28506	3.30273	3.9137	4.3292	4.7938	5.14723	7.04515	5.46191	5.16304	3.9485	2.00211	1.33905	0	0
Arhgap31	0.0120141	1.24309	0	1.10549	1.09973	0	0	1.50911	1.52476	1.64696	1.59702	1.10414	0	0	0	0
Arhgap33	0.000345664	6.28854	5.32687	5.21337	6.04192	5.76534	3.95521	2.5114	2.58755	2.50989	1.4793	1.55349	0	0	0	0
Arhgap36	0.296833	5.71672	5.11576	1.09322	0	0	0	0	0	0	0	0	0	0	0	0
Arhgap39	0.00539238	4.1523	4.84194	3.98598	2.27849	3.98116	1.88394	1.53647	2.28985	1.58538	1.83721	1.85434	1.08343	0	0	0
Arhgap4	0.0001324	9.46853	10.5342	9.52062	8.89849	9.76442	10.7285	8.63795	9.28294	7.99911	6.55369	6.10412	4.45896	3.86603	3.56497	3.47063
Arhgap42	0.00109895	0	0	0	0	0	0	0	0	1.59576	2.10142	1.71024	1.37464	2.23519	2.51359	2.68864
Arhgap44	0.0635085	0	0	0	0	0	0	0	0	1.07906	1.17189	0	0	0	0	0
Arhgap5	0.398412	1.97304	0	2.0082	2.30199	0	2.56719	3.15977	3.53932	1.89305	2.92616	3.06306	3.27034	4.09954	0	2.97011
Arhgap6	0.102834	2.44704	1.3009	1.08428	1.46028	0	0	0	0	0	0	0	0	0	0	0
Arhgap9	0.000327197	12.8108	15.7842	11.4311	12.6789	15.1487	14.3491	13.4843	14.7401	9.79433	8.72852	6.71926	4.41813	2.29706	1.70329	1.51322
Arhgdia	0.0130387	224.141	296.35	175.618	156.904	184.418	113.298	114.998	131.508	107.91	92.481	84.8639	61.8487	66.6127	77.5619	54.6258
Arhgdib	0.00160857	71.7749	79.6063	67.0887	68.2339	108.748	98.3512	72.2033	107.813	68.8187	60.548	38.7587	16.6134	11.3452	7.41405	5.9393
Arhgdig	0.00320331	28.8992	34.8884	26.9144	23.2353	19.9975	11.6731	5.20519	4.27151	4.12006	1.17661	0	0	0	0	0
Arhgef1	0.00135937	34.6608	35.046	27.0299	28.6926	33.2227	26.1004	23.8362	29.3647	23.6456	22.4079	18.6049	17.4524	13.5481	9.97782	9.95271
Arhgef10	0.377958	1.88575	1.37134	0	0	0	0	0	0	0	0	0	0	0	0	0
Arhgef10l	0.0622282	0	2.58976	1.40218	2.78989	4.46835	4.86346	1.32092	1.76854	5.118	6.98043	1.68937	9.7181	6.80694	3.02112	7.36026
Arhgef11	0.104684	2.4984	3.54806	2.44394	2.93406	3.43564	2.5728	3.2853	3.33662	3.79992	5.14073	3.3465	4.29666	3.70931	3.56795	2.84917
Arhgef12	0.475672	7.66213	6.91775	11.4639	11.7619	9.83846	9.21949	7.21709	8.21994	9.047	8.18483	6.77421	9.59053	7.81395	5.50542	8.53453
Arhgef15	0.0133724	2.11127	1.64253	1.56944	1.31984	1.62036	1.2641	2.26176	3.8331	2.29304	3.67573	3.08121	2.64323	2.64317	1.28087	1.0775
Arhgef16	0.0546566	1.93804	2.70593	2.58346	2.93699	4.01544	4.15656	4.79327	2.4612	4.28302	4.23556	4.72883	3.03364	1.30445	2.26044	0
Arhgef17	0.00788788	3.24196	2.78769	1.61451	1.70815	1.9386	1.38674	1.49748	1.23097	1.86567	1.92945	1.28925	1.17288	0	0	0
Arhgef18	0.31633	4.18141	4.5713	3.48155	3.69209	4.26672	3.11292	4.57674	5.00673	3.6832	4.81358	3.95781	4.3053	3.46677	5.38702	6.32285
Arhgef19	0.00241618	1.17053	1.38103	0	1.14735	1.43188	2.14812	2.65916	4.17348	11.9681	16.5558	21.9626	17.0905	26.583	21.9005	9.9708
Arhgef2	0.000307796	6.31138	7.04154	5.67641	5.09706	6.13457	4.38884	4.57953	6.0926	5.14682	4.9881	4.80831	2.5425	0	0	0
Arhgef25	0.00695798	13.3381	9.38338	8.20147	6.52529	5.4599	4.76117	4.39212	3.74565	3.06156	2.41474	2.68713	2.45397	1.45712	0	0
Arhgef26	0.0222428	0	0	0	0	0	1.09704	1.34717	0	0	0	1.0163	0	4.91934	2.89545	6.76059
Arhgef3	0.500781	2.11145	1.81219	2.2539	3.06002	5.72346	7.69062	6.3441	4.40081	5.26977	6.97493	6.23455	5.96692	4.86897	2.74639	6.28878
Arhgef37	0.333533	0	0	0	0	0	0	0	0	0	0	0	0	3.29414	0	0
Arhgef39	0.000136627	21.7891	17.9669	18.5666	21.3725	17.6307	17.8234	10.1735	7.81472	7.46473	5.70477	6.84647	3.08708	1.66719	0	0
Arhgef40	0.0108184	7.16852	6.90461	6.72546	4.7838	6.79871	2.79764	3.42951	2.04102	3.52916	4.67174	2.78687	2.47566	2.27985	1.01531	1.00818
Arhgef5	0.00445335	1.90733	1.38618	1.50226	2.16045	2.83402	3.29787	3.83545	4.83187	4.3628	4.63733	4.36372	4.74297	4.26823	3.29451	3.9802
Arhgef6	0.015269	1.9678	1.27397	1.70125	2.04727	1.40533	2.60759	3.63778	2.86597	2.89918	3.12391	2.73853	1.65145	1.59231	0	0
Arhgef7	0.00746425	9.2872	8.86747	6.60172	5.55144	6.22736	4.8753	5.04082	4.08107	4.69998	5.29997	4.21808	3.69762	3.1762	2.39202	2.10925
Arhgef9	0.184307	0	0	0	0	0	0	0	0	0	1.44746	1.17566	1.16749	0	0	0
Arid1a	0.00202206	21.3442	21.0136	19.4767	16.2055	16.8623	12.1004	10.1531	12.4008	9.85488	9.19279	7.0838	6.14139	5.69269	3.90467	4.01347
Arid1b	0.00562036	2.98954	2.5764	2.78125	2.45047	2.82531	1.71886	2.1568	1.18281	2.09631	2.14444	0	0	0	1.54505	0
Arid2	0.00395682	6.71561	4.85077	6.70335	6.02214	3.61815	4.84999	2.77269	3.99673	3.19979	2.34379	1.78074	2.12697	1.59886	0	0
Arid3a	6.94388e-05	9.89825	10.9472	9.45266	9.86912	11.6927	9.85882	9.12075	8.27201	5.69115	3.72877	2.24354	0	0	0	0
Arid3b	1.79087e-05	4.23471	4.34424	4.70285	3.70959	3.50464	4.16238	2.92259	1.58396	1.45846	1.38204	1.95892	0	0	0	0
Arid4a	0.0475004	6.82278	2.6242	7.15419	6.96283	2.54278	6.02245	4.80593	4.84282	4.57397	4.42862	3.98828	4.07491	3.07816	0	0
Arid4b	0.541683	4.81643	1.24703	2.86844	4.37516	0	3.12757	4.15358	3.58827	2.28244	1.74422	2.79759	3.09538	2.26979	0	1.90321
Arid5a	0.786611	0	0	0	0	1.3281	1.7572	2.52912	1.37895	0	0	0	0	0	0	2.30482
Arid5b	0.331832	1.20145	0	1.31177	1.4978	1.66115	2.42151	2.3252	1.06658	2.40644	2.95595	1.73064	1.78195	2.42846	1.80488	2.89932
Arih1	0.0115043	12.3895	8.27713	11.4649	9.97907	6.36953	7.38918	5.74356	6.87744	5.95344	5.75174	5.1126	4.81776	3.81018	2.99463	4.22974
Arih2	0.00562669	14.3577	14.3345	13.8407	13.8012	12.9177	11.5588	8.54496	12.2356	8.03964	7.47639	6.82874	7.50018	7.85956	7.02336	6.97957
Arl1	0.0470499	28.5505	20.8499	27.3381	28.0046	19.5482	26.8088	30.4986	37.4997	33.4441	36.6578	38.1979	46.7565	36.177	22.4426	32.942
Arl10	0.0350902	6.76222	7.60218	6.3743	5.43596	5.37813	4.73958	4.17471	5.43397	3.87867	5.45379	4.15647	5.09673	3.31661	2.18548	3.0126
Arl11	0.225789	0	0	1.0871	1.40015	1.79151	0	1.70194	1.45496	0	0	0	0	0	0	0
Arl13b	0.326267	1.86487	1.53342	2.02981	1.55127	1.17927	1.14658	0	0	1.01646	1.16907	0	1.21186	2.26689	0	1.26938
Arl14ep	0.598147	3.80816	2.40058	2.5648	3.30108	1.48925	2.33342	2.43788	2.85411	2.139	3.19381	2.80668	3.42964	2.31157	0	2.53809
Arl15	0.0470928	3.182	2.78077	3.43277	2.91532	1.84573	2.11156	1.65257	1.38507	1.96129	2.09381	1.88804	1.46121	1.72439	1.3333	1.86033
Arl16	0.0369122	4.33767	3.62428	3.32455	3.43653	3.2662	4.20786	3.91804	2.953	3.07227	2.7783	3.45242	3.68806	2.86431	2.66159	2.53154
Arl2	0.00452002	23.1192	27.0227	18.1596	17.1691	16.313	12.5662	9.20203	9.68192	8.57	5.17978	6.54008	7.64979	3.61327	4.01721	3.51127
Arl2bp	0.00461156	18.3135	19.8048	18.0626	15.592	11.6538	9.51918	8.31389	11.9722	8.81101	5.96999	6.57531	4.47138	4.02076	2.67074	2.59998
Arl3	0.0346875	23.2007	19.5861	17.937	18.7676	17.4499	14.3244	13.5283	10.3404	16.0574	12.1884	13.8719	11.5948	15.6316	12.0488	11.9238
Arl4a	0.030677	20.5717	13.1073	23.9262	21.1582	18.9045	17.2276	13.8859	18.0033	11.4844	9.85544	9.02781	16.5486	9.93798	6.28063	7.48979
Arl4c	0.0255693	1.44365	1.49956	0	1.30102	1.51073	1.91111	1.18355	2.08805	2.95593	3.35752	2.52646	2.6776	0	0	0
Arl4d	5.0021e-05	2.02802	1.7256	0	0	2.13022	2.17297	6.33711	4.15509	7.41877	9.80556	8.22871	23.588	20.4257	25.6692	32.035
Arl5a	0.135408	17.6115	11.824	18.1077	17.5993	9.92529	14.0169	12.6034	13.1773	16.8002	17.4022	16.6447	13.1152	14.2831	7.78493	9.55619
Arl5b	0.552653	2.78126	1.5631	1.89	2.00868	1.72974	0	2.14781	2.2967	3.09183	4.25537	0	1.24825	3.10609	1.05076	0
Arl5c	0.0170794	1.66426	2.00302	3.32523	2.15952	1.95864	3.48799	4.94409	6.7125	4.9291	2.44633	1.44027	0	0	0	0
Arl6	0.937805	1.86061	1.53327	1.04214	0	0	0	0	0	0	1.11664	1.09544	1.63983	1.41183	0	0
Arl6ip1	0.00542654	96.4505	87.4273	107.751	105.552	88.5686	79.6382	61.3151	61.1936	74.2248	66.9121	75.884	60.4226	37.7982	57.0075	46.8721
Arl6ip4	0.0297284	65.4494	80.8114	60.662	52.4285	46.1345	41.0281	32.7156	43.8014	35.7647	29.9476	32.771	31.3704	35.1172	28.5689	23.7743
Arl6ip5	0.0033314	31.6083	34.5129	27.4096	28.4444	26.3502	25.7159	21.8622	20.5562	17.8461	19.3118	17.7222	19.8125	19.4848	22.3627	19.2542
Arl6ip6	0.00350108	17.4591	14.7879	16.3023	16.2567	10.7137	9.95467	6.21924	7.63212	7.47617	5.82125	5.09938	4.91785	3.86659	1.51063	2.87896
Arl8a	0.360086	8.57887	10.9171	7.46692	7.59948	8.70856	9.01817	10.8643	10.7103	8.82818	9.28065	7.38066	7.60985	7.13639	8.73652	7.90693
Arl8b	0.185501	20.1534	17.0061	19.2342	18.584	14.7537	14.8984	13.5788	15.0985	14.5398	14.4225	14.3969	13.6109	12.1647	10.5933	18.5108
Arl9	0.638777	0	0	0	0	0	1.0254	0	0	0	0	0	0	0	0	0
Armc1	0.0206098	21.3539	16.2479	21.517	18.6975	11.468	11.8597	9.23994	10.5385	10.8472	9.91283	9.48687	7.40885	8.86951	6.84555	8.07067
Armc10	0.104763	11.0937	7.21328	8.06234	7.96343	4.34731	4.99695	5.15892	7.4912	5.37791	5.5379	5.04189	6.66856	3.50371	1.82852	2.56454
Armc5	0.0157082	9.61333	13.3091	9.06636	7.83256	8.01386	4.97867	5.39736	5.63185	5.39777	4.34666	4.72828	3.32986	2.71872	4.35545	3.58708
Armc6	0.0343136	13.5526	16.8652	9.57391	8.41262	8.29311	4.71192	3.77248	3.94225	4.34282	3.81119	4.25624	2.77478	3.04292	3.99479	2.25626
Armc7	0.00660297	2.01377	2.46172	2.68048	1.56508	3.44726	1.78601	2.37149	2.1504	2.03274	3.08073	2.49637	0	0	1.49532	1.06281
Armc8	0.0405556	5.26478	3.7485	5.0447	4.29633	3.00473	2.93621	2.96537	3.48845	3.78882	3.76402	3.05625	2.73418	3.03815	1.65918	1.44154
Armc9	0.0485736	3.15352	3.34305	3.41144	2.26518	1.49349	1.58501	0	1.23288	1.68466	1.14802	0	1.11581	0	0	0
Armcx1	0.0316657	3.50769	1.95785	2.14993	1.83029	1.37218	2.25873	1.87729	1.76196	1.76791	2.31457	1.6739	1.8278	1.05235	0	0
Armcx2	0.000971173	11.3498	10.33	7.96112	7.75729	6.66576	5.88231	5.09427	3.40955	4.19559	3.84351	2.95357	1.82276	1.48618	0	0
Armcx3	0.0625056	5.81765	3.10776	5.09418	5.97204	3.60038	5.64262	5.18444	4.24845	4.52912	5.55589	4.83861	5.01169	2.83568	1.00498	2.43952
Armcx4	0.0641893	2.49111	0	1.45154	1.38768	0	1.29257	1.60512	1.46552	2.43505	1.88041	2.20581	1.5464	0	0	0
Armcx5	0.339873	2.23574	1.09679	1.70483	1.15964	1.06026	1.02676	0	1.77611	1.25423	1.36594	1.25506	1.52848	1.18876	0	0
Armcx6	0.00187511	4.5742	4.01401	3.34028	2.63754	2.01041	1.9146	1.99825	1.97622	1.47736	1.93221	1.13656	0	0	0	0
Arnt	0.00989173	12.3202	10.4808	11.0457	9.48097	9.15252	9.17703	7.75494	7.25225	7.62681	8.54213	5.72507	8.30842	6.5479	4.22107	4.66343
Arntl	0.0354494	2.56427	1.98605	2.1669	3.24087	4.29566	4.27538	6.43154	5.2527	5.29245	5.45911	5.03672	4.53703	6.60617	6.03997	7.02028
Arpc1a	0.00740848	49.6492	50.6112	44.1776	45.0967	38.8311	30.1992	29.6134	26.15	26.3372	27.0461	27.2109	30.1956	26.1384	23.2376	20.8679
Arpc1b	0.00300192	35.2136	25.7794	33.0447	31.6136	36.8462	35.0052	39.4475	40.216	34.9976	35.479	33.2392	28.243	21.2103	14.0293	16.4695
Arpc2	0.0109481	113.847	83.487	92.4955	96.5062	84.0132	79.4791	83.5347	117.874	99.8935	101.993	94.28	80.7378	78.6406	51.0373	56.8473
Arpc3	0.0590242	65.9895	102.466	65.1525	88.8494	53.2439	63.4416	50.8422	39.1375	61.5631	40.261	53.9537	60.5001	25.7149	48.7264	26.3464
Arpc4	0.0115381	60.4086	91.0057	53.4312	51.8624	56.2179	39.0036	41.9632	39.905	34.0852	32.2743	15.9486	23.4229	24.1488	29.8126	20.3389
Arpc5	0.00137493	70.9036	52.4293	66.7939	64.6012	47.125	55.2116	51.5866	53.896	44.303	43.961	40.3485	34.4557	31.5659	22.4755	25.7967
Arpc5l	0.0181359	30.5596	25.2192	29.4141	24.1413	21.4412	23.4193	21.229	21.1197	21.2782	16.1826	18.4693	14.6204	19.7602	20.473	18.3609
Arpp19	0.372415	22.5008	38.6002	20.1336	19.9466	31.6226	36.6226	10.6694	10.3893	24.8066	11.5102	12.5326	10.4865	42.1484	18.9517	7.23485
Arrb1	0.00278874	87.3154	149.703	116.626	103.6	111.945	58.38	27.8911	21.0905	39.0797	13.8393	9.23499	2.57694	2.71579	1.29167	0
Arrb2	0.00567155	31.9443	30.225	24.2593	25.9136	30.6775	36.7778	39.5607	40.2906	27.0756	26.5414	25.0812	21.7842	14.4573	10.7697	7.88359
Arrdc1	0.00171644	7.53364	9.36373	6.94417	6.12725	8.04773	6.4714	5.51994	6.85972	4.52129	4.72139	3.52138	3.97392	1.72576	1.16804	0
Arrdc2	0.000154863	13.7603	12.5137	14.8922	13.7623	11.7692	11.2662	8.20186	5.42936	3.49837	3.00537	2.99981	2.14054	5.02441	2.47078	2.91857
Arrdc3	0.235945	7.5497	3.88038	6.57124	9.34224	5.92845	8.68683	12.0664	11.162	13.1295	13.0384	10.6812	14.3127	25.3122	13.626	1.86153
Arrdc4	0.0114344	2.20248	1.98636	2.12719	1.67775	2.3107	3.69563	5.22741	12.096	11.4185	14.9216	8.35177	15.1545	5.35445	2.61362	2.82504
Arsa	0.0787496	3.13625	3.3662	2.92071	2.35697	3.03064	2.22543	4.20536	3.40098	2.87948	3.08766	3.10553	3.59478	2.92827	7.43703	5.71203
Arsb	0.0230346	2.55905	3.05882	3.21451	4.45687	6.11485	4.20514	4.34881	4.40928	7.46157	10.3358	9.07246	8.77794	6.21453	6.70873	4.71889
Arsg	0.00250795	0	0	0	0	1.21937	1.35842	2.02383	5.7291	9.2398	14.1064	12.5807	17.3696	5.13981	11.6374	7.3805
Arsk	0.254126	1.42544	0	0	1.03825	0	1.0535	1.15776	0	0	1.36743	1.09703	0	0	0	0
Art3	0.136598	0	0	0	0	0	0	0	1.00368	0	0	0	1.43609	2.47744	0	0
Art4	0.000624801	21.097	24.2111	29.2988	24.2558	19.7878	15.0043	10.3796	7.28931	7.95347	3.15726	2.66559	1.36495	1.45168	0	0
Artn	0.00294632	1.74218	2.17768	1.64501	1.88394	1.53515	1.07422	0	0	0	0	0	0	0	0	0
Arv1	0.00873286	3.46396	3.31805	2.28103	2.41526	1.51199	2.16209	1.93481	1.77807	2.4731	1.78204	2.01832	1.1511	1.41728	0	0
Arvcf	0.151597	2.53	2.95705	2.04327	2.26457	2.68525	1.97075	3.77704	3.47239	4.61396	5.16174	3.72229	3.63446	5.20889	1.0103	1.24204
Arxes1	0.000770757	10.3142	8.39465	6.38123	5.83335	4.81399	5.18673	4.35585	2.7218	1.76811	1.90877	1.83262	0	0	0	0
Arxes2	0.000675865	9.88254	7.65972	6.20432	5.54648	5.13275	5.50828	5.30588	3.73493	2.6168	2.53884	2.2569	1.9035	0	0	0
As3mt	0.00281315	10.7955	8.78013	8.94464	9.28437	9.19675	10.6287	12.9825	11.3686	11.9097	12.0823	13.7435	13.7263	23.1687	16.8078	18.2886
Asah1	0.0780172	14.763	10.2073	14.937	17.9751	15.0478	17.739	20.1097	17.1129	16.6734	20.2923	15.524	15.8523	14.1505	5.98217	7.85664
Asah2	0.00879597	0	0	0	0	0	0	0	1.03811	1.81518	2.49124	2.34569	2.91257	2.83825	0	1.01737
Asap1	0.00235129	30.6176	26.5531	33.1128	26.2797	17.2671	14.3252	11.5279	11.3163	10.0882	4.99037	7.6392	3.66601	1.07228	1.97763	1.45375
Asap2	0.192421	4.13995	2.97677	2.68181	2.17635	2.58234	2.02379	2.82995	1.57042	2.47072	2.81027	1.8085	3.82613	2.98787	2.88386	2.65735
Asap3	0.0406213	1.23002	1.6282	1.70355	2.34507	2.82423	3.28933	6.68807	4.78906	5.6393	6.54083	5.61584	4.2619	2.11706	2.35754	3.31158
Asb1	0.00156397	11.5129	11.5005	12.7395	10.0116	7.6565	5.7041	5.3952	4.36029	5.95977	2.63918	2.28088	1.22857	1.3073	0	0
Asb13	0.000450896	2.6177	1.85165	2.86749	4.22786	3.56946	5.09022	5.81649	9.28144	9.1963	13.8023	16.3198	16.046	11.9683	12.0101	15.2622
Asb17	0.370085	1.31585	0	1.47514	0	0	0	0	0	0	0	0	0	0	0	0
Asb2	0.00275565	0	2.35175	2.33516	3.05938	3.64177	2.36326	3.30625	4.43059	4.39162	4.06227	3.69398	1.03633	0	1.14858	0
Asb3	0.0020313	3.64469	2.5409	2.93612	2.90539	1.77068	2.42037	2.57202	1.57672	1.50325	1.39707	1.17735	1.52666	1.47687	1.06891	1.34575
Asb4	0.309854	12.2668	3.48011	2.24162	1.88967	0	0	0	0	0	0	0	0	0	0	0
Asb6	0.000406984	15.8318	18.5263	16.2557	14.4619	13.0935	11.0357	8.8677	6.94795	5.40122	4.0316	4.64575	2.82704	2.70111	3.08926	2.9221
Asb7	0.0475144	1.99898	1.43845	1.97289	1.99557	1.99474	2.06259	2.12554	2.02756	1.8794	2.14201	2.06106	2.00847	1.62	1.0149	1.20215
Asb8	0.17184	10.7698	11.1071	11.245	9.52027	8.21137	9.53051	10.6973	10.2688	11.2488	9.61332	11.5615	9.56247	9.6619	9.32281	8.18229
Ascc1	0.00884981	14.8341	16.9099	14.6421	13.671	13.5825	10.7172	11.0072	11.3374	9.82628	9.26949	7.70316	9.9811	9.64849	9.92336	6.90878
Ascc2	0.00508363	15.8861	17.0162	15.5477	12.973	12.422	9.83496	10.8939	8.30639	9.12606	9.77465	9.26	8.55905	8.44636	7.61142	7.38197
Ascc3	0.0350003	4.23302	1.99131	4.49974	3.95787	2.05437	2.6155	2.32797	2.15136	1.80441	2.07436	1.77998	1.56729	1.76147	1.0484	1.72968
Asf1a	0.0045041	26.1032	18.6806	25.4479	20.564	11.3236	13.8202	8.06359	8.4048	7.59097	5.49174	5.91365	3.7786	3.70883	2.3785	2.73837
Asf1b	0.000741887	57.1482	52.2073	60.151	54.2312	50.772	33.2499	19.4925	17.3254	19.6945	10.9755	9.2755	2.81139	2.68701	0	0
Asgr1	0.000137809	2.67215	1.82812	3.13416	3.74773	3.15753	28.2546	148.244	289.489	205.696	223.692	264.624	278.843	374.31	403.87	283.36
Asgr2	0.000254344	7.42496	9.82037	10.5816	15.4402	18.9842	23.55	33.5732	62.6569	61.2067	83.2092	88.3406	99.6384	113.008	127.09	66.1231
Ash1l	0.184682	2.92911	1.23972	2.75946	2.60167	1.54988	2.07008	1.71351	2.54634	2.56138	2.49512	2.10984	2.03266	1.65644	0	1.99856
Ash2l	0.0105622	23.7517	19.4629	19.8732	17.1664	12.6021	10.5365	9.67891	10.1107	10.5619	7.51615	9.21288	7.69753	6.97474	5.63234	4.83441
Asic1	0.711829	1.41485	0	0	0	0	0	0	1.10591	0	0	0	0	0	0	0
Asl	0.00924444	17.808	23.1191	19.0227	26.1381	30.8996	32.3874	55.361	80.5557	94.7123	71.8615	102.618	52.4543	276.137	228.671	128.887
Asna1	0.0363115	59.7862	76.0623	54.6851	44.6529	43.7601	30.0503	24.696	24.5329	28.3331	22.5465	28.4868	17.9263	21.0545	32.1786	26.442
Asns	0.000756538	140.04	157.522	130.805	110.27	109.313	70.856	57.8919	31.862	33.2706	20.6876	19.0074	9.73501	9.73964	2.12903	5.31488
Asnsd1	0.00694037	36.7054	30.2759	38.1037	31.3818	23.8074	21.1489	16.6436	16.7004	17.4942	14.522	15.8833	14.3386	15.4491	10.1488	9.98095
Aspa	0.00448181	0	0	0	1.22747	1.23803	2.01321	0	2.89335	3.98541	5.09641	5.72994	4.85103	2.8987	1.1578	1.43792
Aspdh	0.000533686	3.67916	4.63573	6.21603	8.97762	12.8339	15.4453	23.5578	18.2739	41.8438	48.357	67.8713	60.2469	105.645	126.051	93.0599
Aspg	6.28281e-05	0	0	0	0	0	1.21972	7.33637	5.85835	7.05339	6.57094	4.8578	31.4788	58.4301	57.6634	61.8945
Asph	0.0998903	12.2194	8.81519	12.4694	16.7743	12.5992	6.86248	8.75724	3.88313	9.08016	8.60236	11.59	9.24374	7.36299	3.55086	4.66836
Aspm	0.0186587	5.10069	2.12159	7.06024	5.99201	1.89137	2.55319	1.48653	1.54061	1.79664	1.19127	1.33056	0	0	0	0
Asprv1	0.332142	0	0	0	0	2.73775	5.39876	7.49237	5.81802	1.5699	2.4104	1.05805	0	0	0	0
Aspscr1	0.0176051	23.7652	22.803	12.7458	11.4013	14.6622	10.7848	17.6848	22.0139	13.4679	18.8254	25.6049	26.6054	46.3953	31.4193	25.1731
Asrgl1	0.017144	5.36348	5.81409	5.36304	4.02719	3.29472	2.81759	2.2597	2.82824	2.23314	1.83971	1.27508	1.76009	2.68757	1.52407	1.26935
Ass1	0.0276857	39.4296	72.3886	59.4285	122.902	374.969	386.882	443.362	246.678	415.588	293.828	482.13	141.537	2296.75	2184.92	892.392
Aste1	0.0729465	2.88071	2.46244	1.63245	1.53656	1.21035	0	1.13936	2.33068	0	0	1.21188	0	0	0	0
Asxl1	0.0135188	7.97133	12.0752	10.7195	10.5103	9.48111	5.97934	3.78112	6.37998	6.33189	5.02818	3.25256	5.28315	2.54028	1.13058	1.56145
Asxl2	0.0120239	4.27248	2.80091	2.93696	4.45471	3.10242	1.97462	2.9054	1.70051	2.79803	2.64499	2.42716	1.89776	1.38253	0	1.36474
Atad1	0.252562	14.1009	6.91196	11.5071	11.6435	6.98806	10.1989	8.96914	11.5958	12.3936	13.0978	12.6327	11.0855	11.7415	6.54282	9.66928
Atad2	0.00587778	16.7237	8.3191	16.7861	16.5489	7.03591	9.08364	5.62848	4.58035	6.46644	3.91654	4.21438	1.80231	1.80834	0	0
Atad2b	0.0290881	2.23801	1.04822	3.09027	2.4977	1.01244	1.19129	0	1.08532	0	0	0	0	0	0	0
Atad3a	0.132195	54.8044	61.113	34.7743	35.4116	33.2913	32.778	28.3496	40.1572	24.0886	22.9981	23.4333	21.4282	33.597	31.4991	18.2274
Atad5	0.0051043	7.55558	2.92867	8.023	7.58146	2.75274	5.71416	2.40916	1.96954	2.1522	1.18828	1.25267	0	0	0	0
Atat1	0.00742248	3.52748	2.99883	2.75983	1.99925	1.77667	1.9342	1.31261	1.84249	2.27398	3.07137	2.49023	4.69582	3.03519	4.8962	5.20371
Ate1	0.0260465	6.91647	4.4394	6.14968	5.26408	4.06844	3.66609	3.31798	3.69633	3.70323	4.02771	3.21967	3.39586	2.90891	1.26936	2.24742
Atf1	0.0051472	36.0804	26.6668	36.781	33.3445	21.9624	20.1084	15.0813	18.1441	17.0681	13.5025	10.1303	9.94672	10.2754	6.13029	7.27924
Atf2	0.0342865	7.44622	4.07391	6.97175	7.77818	4.67461	5.24505	4.4439	4.76541	4.39517	4.78442	3.37766	4.05775	3.55704	2.44062	3.28698
Atf3	0.614981	1.67787	1.50903	0	1.55188	1.02999	1.23249	1.05716	0	1.09607	1.29521	1.94623	1.6155	0	0	1.12516
Atf4	0.000301383	174.474	167.967	176.335	152.285	130.506	140.309	98.2178	71.2877	65.8154	50.481	57.4825	54.8708	52.2589	51.2961	60.0588
Atf5	0.0447212	43.1611	62.8756	54.1822	67.2686	130.212	183.364	346.05	412.873	278.123	282.485	275.422	416.796	303.526	247.803	138.104
Atf6	0.375317	6.42053	3.96252	6.04223	5.71785	4.08466	4.42161	3.99632	5.1119	3.95861	4.12491	2.91848	4.69109	6.42289	4.04447	4.79549
Atf6b	0.0743652	27.1708	29.1321	18.4761	17.4479	18.5732	11.9005	11.5527	11.9816	10.3973	11.0935	9.52163	5.48899	10.984	17.4245	12.8258
Atf7	0.00613679	2.51989	2.84831	2.70308	2.22045	2.39841	2.23562	2.27899	1.2663	1.65389	2.35866	0	1.21525	1.27567	0	0
Atf7ip	0.000569436	8.63032	9.57697	10.296	9.19896	9.14667	6.29153	5.08924	3.80177	4.96978	4.31285	3.05422	1.84472	2.3408	1.94932	2.05647
Atg10	0.295354	1.38788	0	1.02846	1.01241	0	1.1138	1.24191	1.38856	1.42218	1.42236	1.87354	2.14938	2.09822	0	1.09892
Atg12	0.0587553	10.7581	6.45863	9.26127	11.3103	8.27054	9.94188	7.52363	8.34035	8.58149	8.7364	7.91138	8.03604	6.11426	5.65416	6.25614
Atg13	0.0597338	7.78577	10.0091	9.028	8.91715	10.8985	9.64147	9.56495	9.97488	9.08951	7.95503	6.4426	7.52344	12.1788	18.5913	15.5767
Atg14	0.00763327	2.92629	3.47725	3.92048	4.75858	4.67229	5.16562	4.2396	2.33527	1.76773	2.80027	2.48509	4.09023	3.32705	3.09345	3.66305
Atg16l1	0.00164985	9.20931	7.74667	8.96941	9.40227	7.99878	9.30491	10.7475	10.574	11.8813	11.6496	9.74046	7.47013	7.37313	6.88829	6.96186
Atg16l2	0.0872611	1.49395	1.85558	1.63533	1.97802	2.38903	4.53081	3.64361	3.24402	2.79486	2.08769	3.45169	3.78277	2.71229	7.20435	14.1787
Atg2a	0.078035	7.19692	9.41673	6.61444	6.55089	8.1934	5.94573	7.19536	8.16806	4.95067	4.57848	4.78942	7.71081	7.17586	9.96527	8.00599
Atg2b	0.00776008	6.53849	5.71831	5.47637	4.89389	3.49525	3.84363	3.14077	3.31936	2.80648	2.38431	1.96835	2.14115	2.48752	2.12001	2.65542
Atg3	0.00792689	15.0648	10.8745	12.8911	11.7312	9.63715	9.94463	9.22283	13.335	15.7826	18.7332	21.9378	17.0009	24.9242	15.7793	21.2655
Atg4a	0.00135648	5.74136	5.33108	8.9877	8.53187	5.97088	6.91336	5.57816	4.18007	3.67496	2.55911	2.62478	1.55505	3.23039	1.98968	2.92802
Atg4b	0.000385358	18.2117	21.0636	18.5714	16.5258	18.3837	13.5008	12.8263	8.68189	9.82381	8.11308	8.10868	6.33967	6.64383	8.67886	6.05194
Atg4c	0.062839	1.95021	1.31969	1.20949	1.64775	1.36665	1.4915	1.76695	1.8639	2.70231	3.38388	3.54388	5.01233	2.76876	1.8801	1.76873
Atg4d	0.000483491	47.1844	59.4223	48.6172	50.1169	58.9506	38.8572	28.4444	22.9197	22.6365	13.2342	13.487	10.462	10.8637	12.383	10.7734
Atg5	0.00196663	8.5076	7.78065	7.94771	7.04072	5.39365	6.66206	6.44672	9.48814	9.01455	9.45077	10.315	9.13163	11.8362	12.8352	10.7673
Atg7	0.0256419	5.27308	6.76181	5.2172	4.6509	4.45128	3.90175	3.87816	4.68005	5.40522	6.31243	4.95958	5.44407	8.24845	14.4378	9.1872
Atg9a	0.0198035	18.4537	21.8576	17.6086	18.8507	25.6321	21.2787	18.5267	15.4532	12.2016	11.3143	10.7167	8.77731	15.3385	21.5115	15.3804
Atg9b	0.200254	0	0	0	0	1.66751	2.7209	2.60527	0	0	0	0	0	0	0	0
Atic	0.0152919	65.2512	66.4373	45.7296	34.4746	32.4862	20.952	17.358	17.0322	16.6713	13.3707	11.6377	8.9501	8.67232	10.1923	6.088
Atl2	0.943011	18.0418	12.1249	16.0843	16.5214	12.4347	14.0869	13.2502	20.8467	13.1377	13.6306	12.9068	17.8035	14.4775	9.54999	15.6531
Atl3	0.21753	6.98794	5.8823	7.80369	6.98846	5.19147	4.01183	5.39501	5.08538	5.89697	8.19146	5.57947	10.3526	11.3744	6.3305	5.30025
Atm	0.369896	1.11899	0	1.02186	0	0	0	0	0	0	0	0	0	0	0	0
Atmin	0.0155096	4.75742	5.38937	4.94513	3.72509	3.45178	2.40171	2.39103	3.57461	2.54339	2.45121	1.91894	2.23016	1.25738	1.13296	1.38034
Atn1	0.00669068	14.8782	13.9444	10.7061	11.8415	14.1547	12.9141	13.6999	19.3559	16.5772	16.484	14.2873	18.7173	19.2432	19.9378	15.0394
Atoh8	0.00286946	1.21948	0	0	0	0	0	1.21434	2.25332	0	1.77558	1.08781	11.2994	23.6329	7.01875	9.1764
Atox1	0.00247045	61.3747	84.0427	77.3689	71.9854	76.1644	62.5834	60.8181	80.0072	108.541	102.751	118.749	94.2191	178.101	165.641	145.623
Atp10a	0.63514	1.31206	0	0	0	0	0	0	0	0	0	0	0	0	0	0
Atp10d	0.327631	0	0	0	0	0	0	0	0	0	0	0	1.15331	0	0	0
Atp11a	0.315605	2.20971	0	0	0	1.34399	0	1.08605	1.45074	1.90358	1.59854	0	0	0	3.31917	13.4307
Atp11b	0.141981	7.94719	4.24712	7.61457	8.72362	4.58482	7.82265	5.58814	6.09187	6.36268	2.95011	5.82816	4.8506	6.27221	1.18235	3.34137
Atp11c	0.00265037	2.7782	0	2.86498	2.06776	0	1.23096	1.50696	1.92674	2.91347	5.15468	5.86799	8.44913	12.9415	4.85899	14.0207
Atp13a1	0.0460123	22.0497	23.6109	16.0597	16.7149	17.9716	15.8388	14.8649	16.8699	13.9705	12.8433	12.1361	10.1747	13.0823	16.6384	11.0415
Atp13a2	0.0138331	17.2967	21.9274	11.9737	15.0121	17.5989	12.348	13.2017	18.8164	13.2056	13.8355	8.89704	7.84993	7.15174	8.2976	5.7359
Atp13a3	0.785255	11.0837	7.3757	10.962	9.40321	5.58946	6.89665	5.81898	8.1385	7.99233	9.65853	7.1061	7.57558	9.55748	4.955	7.28744
Atp1a1	0.70026	78.3694	89.7719	70.444	63.3911	70.4133	50.6391	45.5511	55.4959	89.8277	84.3244	74.4635	55.6889	99.1286	72.4322	60.0944
Atp1a3	0.453622	0	0	0	1.15883	1.93811	0	1.59595	1.82	0	0	0	0	0	0	0
Atp1b1	0.0258413	7.7726	7.23974	8.55298	12.5852	15.4325	23.8512	18.6084	27.1379	26.2912	28.2248	28.1631	23.9462	29.738	10.5818	14.6333
Atp1b2	0.00647503	44.4059	35.8413	37.3578	26.4379	19.6093	12.8001	6.25873	5.15747	6.2563	2.2321	2.06906	0	0	0	0
Atp1b3	0.0135028	53.3522	32.9859	42.6568	39.1499	26.9042	28.637	23.3592	26.2492	24.9285	23.7342	20.9914	19.6948	18.7859	10.0726	14.0272
Atp2a2	0.522975	57.4767	51.939	46.5409	40.6704	38.9616	28.7981	29.42	38.1003	39.1747	37.7323	28.1988	29.3007	43.4112	35.467	39.7644
Atp2a3	0.00397496	12.809	14.3922	8.25078	8.03217	16.6309	11.9055	12.0256	17.9828	10.5137	8.02989	4.81368	1.62616	1.06474	0	0
Atp2b1	0.179954	8.02632	3.49285	7.57637	7.413	3.58862	5.61601	4.2093	5.88699	4.76448	5.39826	4.90311	4.70565	4.68701	1.83426	2.94671
Atp2b4	0.000548883	31.6073	29.6143	35.64	39.2235	33.7838	23.0218	11.8952	7.59595	10.9894	4.2726	2.78506	0	0	0	0
Atp2c1	0.0296003	7.40186	3.71498	5.67168	7.68231	5.77664	4.25101	5.6326	6.02844	3.5315	5.82457	3.84163	2.7226	4.03307	2.09463	2.74133
Atp4a	0.93569	0	0	0	0	1.36128	1.61346	0	0	1.05054	0	0	0	0	1.66229	0
Atp5a1	0.708376	408.055	447.64	369.636	334.102	358.446	277.349	302.499	326.17	343.467	312.193	318.987	371.971	437.342	366.741	237.862
Atp5b	0.189446	736.094	822.443	668.965	606.559	695.367	511.499	489.213	488.348	537.72	544.23	562.727	584.146	634.331	524.589	331.296
Atp5c1	0.383006	140.103	154.253	118.428	129.8	97.5181	94.0348	115.295	110.325	114.771	102.842	117.192	146.526	170.104	144.126	87.3573
Atp5d	0.195958	192.793	217.965	135.843	131.088	179.56	170.702	187.88	219.914	208.004	134.067	198.861	214.858	251.869	336.753	150.024
Atp5e	0.0987858	112.53	150.863	108.821	109.24	118.805	106.021	114.925	106.628	122.945	94.6179	114.272	103.294	170.974	184.541	133.123
Atp5f1	0.293419	135.592	49.1396	129.401	59.5968	89.6601	57.5268	53.5072	51.7578	54.83	47.0586	61.5431	69.4103	77.0008	42.5642	46.7973
Atp5g1	0.0826997	114.751	190.829	123.713	122.078	132.598	132.83	172.64	123.792	237.263	129.636	200.402	153.177	303.669	308.374	173.02
Atp5g2	0.105717	348.728	416.34	317.971	288.601	343.47	307.155	286.208	328.108	268.048	254.559	287.482	328.667	255.357	261.239	176.703
Atp5g3	0.538395	387.187	478.016	419.343	403.94	365.523	437.882	392.079	527.752	477.569	355.28	459.913	510.566	604.099	488.464	280.292
Atp5h	0.0576975	280.191	315.777	306.055	267.991	278.792	249.617	215.03	212.787	212.925	171.293	225.12	241.253	305.424	251.051	190.266
Atp5j	0.0586742	108.083	80.3196	136.32	106.312	85.9711	101.247	103.745	89.6413	106.692	107.275	119.198	214.443	166.843	112.026	118.481
Atp5j2	0.0508017	163.094	180.147	164.403	161.702	162.862	163.289	153.234	126.082	144.167	125.804	152.056	146.86	177.331	199.053	145.612
Atp5k	0.332683	184.55	138.314	236.617	154.263	163.345	165.741	139.339	134.681	156.907	128.467	152.563	132.92	237.204	226.549	148.762
Atp5l	0.180327	161.301	174.825	171.512	150.646	151.051	161.931	164.48	195.974	168.721	130.91	157.071	188.539	231.767	195.562	149.954
Atp5l-ps1	0.721706	1.63843	1.17818	0	0	0	0	1.41365	1.05811	0	0	0	1.03983	0	1.55999	0
Atp5l2	0.444699	3.52554	4.11052	5.72954	3.39439	3.01697	5.1402	3.69943	4.08509	3.42901	2.36466	4.13204	3.71892	5.63753	4.87914	3.55257
Atp5o	0.653473	143.072	182.627	146.655	151.052	133.069	124.5	130.627	147.977	155.223	99.0929	121.471	131.784	154.301	158.727	108.02
Atp6ap1	0.000858854	36.0489	35.8472	38.1066	40.8608	38.7455	37.9736	34.3714	33.429	32.9995	30.6187	25.1434	23.4765	23.4061	25.4328	29.4157
Atp6ap2	0.0886003	21.0138	13.5139	22.5555	22.6076	15.6464	19.2345	17.6312	17.7641	16.4637	18.2806	16.3555	19.8037	12.4567	8.01612	11.3342
Atp6v0a1	0.00147712	30.0463	38.2309	29.7291	29.0105	29.6254	22.8856	21.7283	16.4995	16.3513	13.1615	10.141	6.50784	14.1372	16.8143	14.539
Atp6v0a2	0.339246	6.7904	7.06142	5.02326	4.8062	4.62924	3.91392	3.5331	4.45404	5.28616	5.2795	4.10604	3.67794	4.03298	3.85957	4.59823
Atp6v0b	0.00295657	97.0083	111.904	82.339	87.0748	101.649	89.9098	89.5046	77.0875	69.715	57.6492	55.1238	65.1656	66.8834	80.9689	63.1877
Atp6v0c	0.0640223	170.215	260.35	163.315	190.739	234.154	177.396	139.001	164.028	139.98	134.818	143.306	100.013	122.552	184.961	102.962
Atp6v0d1	0.213066	36.6429	48.0942	38.398	36.6029	45.092	34.7417	30.9775	30.574	34.8623	28.8929	28.7442	27.2077	31.7304	46.7117	35.4911
Atp6v0d2	0.0942414	0	0	0	0	0	0	0	0	0	0	0	1.06511	2.17669	0	0
Atp6v0e	0.0033196	81.5035	96.9287	74.8086	65.7941	68.942	60.3506	46.1776	43.5866	42.1293	30.8152	32.7787	29.1674	33.2412	43.7432	38.2669
Atp6v0e2	0.174034	1.35976	1.00912	0	0	0	0	0	0	1.25484	1.52383	1.83408	1.13317	0	0	0
Atp6v1a	0.178757	15.6054	12.3942	14.5896	10.5342	10.1221	10.6848	8.52232	9.40701	9.493	13.5374	9.73797	10.8297	10.1244	5.64167	7.28009
Atp6v1b2	0.000115463	42.7604	42.3757	43.4288	41.3193	41.2762	37.7499	30.73	27.3246	23.8454	25.2528	21.4386	20.3965	15.433	12.8828	9.87641
Atp6v1c1	0.0795154	20.485	18.642	18.8521	17.5334	13.763	14.3891	13.4039	14.1321	16.0311	16.2216	15.2451	15.2348	14.6515	9.38618	9.37357
Atp6v1d	0.0722965	30.4683	20.7258	25.4693	29.572	19.4947	21.2575	22.1049	23.705	25.7456	20.0012	22.814	21.4742	17.6699	13.4694	17.8772
Atp6v1e1	0.169538	79.1084	72.9733	86.734	93.378	85.2012	86.1135	84.0593	93.6172	93.2471	82.2842	89.1205	104.431	68.6618	54.9396	46.8583
Atp6v1f	0.32372	86.6491	95.7336	73.8604	65.5475	63.7481	71.101	72.5651	75.3528	63.1988	57.0721	56.3966	59.8907	71.7783	90.812	63.4592
Atp6v1g1	0.0754913	59.9652	53.0269	59.6014	62.1942	60.2597	87.2768	78.0085	70.4512	55.2957	41.2645	48.4479	46.1352	48.7065	47.8475	48.3967
Atp6v1g2	0.333664	1.45399	0	1.16175	1.0754	1.24001	1.1878	1.14301	1.05237	1.95717	0	0	1.30189	0	0	0
Atp6v1h	0.138253	20.3563	16.0375	16.7963	16.2368	13.4748	14.9078	15.0105	16.108	14.6413	16.73	17.8615	15.9958	27.337	18.0527	20.0562
Atp7a	0.0210648	2.36447	0	2.78253	3.28183	3.49696	2.09287	0	0	0	0	0	0	0	0	0
Atp7b	0.000501336	10.7255	12.3066	11.6244	11.2644	12.6581	10.3941	7.36586	4.07457	6.36036	8.27955	5.44201	4.85536	3.39262	3.10375	2.21146
Atp8a1	0.0100993	10.9641	3.45362	10.9667	8.71237	3.37722	7.5235	2.92278	3.01085	3.89143	1.14738	0	0	0	0	0
Atp8a2	0.00842338	0	0	0	0	0	0	0	2.46577	0	1.55224	3.16742	0	0	0	0
Atp8b1	0.0173637	0	0	1.27168	1.72785	1.41438	2.53331	2.77921	2.35642	3.48059	4.2918	3.23519	4.16527	2.54825	2.74577	4.40048
Atp8b2	0.00351674	5.01598	3.82164	2.46727	2.80834	3.31327	2.21432	2.38334	3.19151	2.81731	3.21252	1.4112	1.18329	0	0	0
Atp8b4	0.0625055	0	0	2.37287	2.30263	2.19678	1.52389	1.80446	1.24621	1.06027	0	0	0	0	0	0
Atp9a	0.00224939	3.123	3.68399	2.76671	3.3298	5.31473	4.98279	8.82799	14.095	12.245	18.5545	11.4531	20.2915	10.1288	20.0661	11.8542
Atp9b	0.0439159	6.24084	5.82498	5.31619	5.36029	4.44862	5.21116	5.20945	6.09471	6.37813	7.19101	6.43269	6.31815	5.56264	4.37761	4.39187
Atpaf1	0.328147	5.75117	4.24834	5.16411	4.21327	3.55178	2.96854	2.99983	2.86126	3.68607	4.79162	4.65713	3.85257	3.5519	2.61683	2.64597
Atpaf2	0.0241117	25.4613	26.6136	21.1315	19.7888	18.0187	15.2097	11.4172	11.3001	14.1216	12.1153	15.4742	12.216	12.7242	9.73766	10.152
Atpif1	0.00440337	317.277	566.169	342.696	307.209	216.573	503.699	182.883	107.605	214.893	113.907	55.8409	62.3133	31.6049	19.2319	21.2824
Atr	0.35218	2.4213	0	2.06453	1.91884	0	1.2845	1.22092	1.5018	1.24935	1.45564	1.63033	1.23727	1.23257	0	0
[truncated: 13,069 more rows]

## Sheet: Sheet3
GeneSymbol	Ratio	specific phase	specificity	Cluster1	Cluster2	Cluster3	FDR	E12.5_R	E13.5_R	E14.5_R	E15.5_R	E16.5_R	E17.5_R	E18.5_R	D1_R	D3_R	D5_R	W1_R	W2_R	W3_R	W6_R	W8_R
[truncated: 3,684 more rows]

[truncated: 2 more sheets: Sheet4, ReadMe]
