# Supplementary material for: A time-resolved multi-omic atlas of the developing mouse liver
Source: HighWire-hosted journal article supplement (doi:10.1101/gr.253328.119), 2020-02-01
Supplement: Supplemental_Table_S3.xlsx [file Supplemental_Table_S3.xlsx]

## Sheet: Sheet1
Gene.ID	GeneSymbol	Liver Function	E12.5	E13.5	E14.5	E15.5	E16.5	E17.5	E18.5	D1	D3	D5	W1	W2	W3	W6	W8
50908	C1s1	Complement	0	0	0	0.01	0	0.03	0.0533333	0	0	0.0733333	0.0466667	0.13	0	0	0.0233333
17850	Mmut	Valine/Leucine/Isoleucine metabolism pathway	0.236667	0.593333	0.43	0.566667	0.336667	0.646667	0.863333	1.56667	4.89	4.43333	7.64667	5.92	7.54	7.46667	6.40667
72157	Pgm1	Glycogenlysis	2.23667	2.03	4.89667	6.17667	8.65333	20.63	29.8967	37.4833	46.1367	35.5867	44.29	42.27	43.4767	37.4367	28.9733
66681	Pgm2	Glycogenlysis	1.28	0.653333	0.8	0.873333	0.436667	0.753333	1.62333	1.88667	0.593333	2.76	1.70667	3.08667	1.10333	0.67	0.39
27413	Abcb11	Cholesterol synthesis	0	0	0.11	0.02	0.0233333	0.223333	0.646667	1.4	2.72	2.76667	3.98333	2.9	3.83333	3.11667	3.49333
170789	Acot8	Cholesterol synthesis	0.33	0.333333	0.183333	0.66	0.666667	1.38333	0.213333	0.206667	0.396667	0.493333	0.48	0.393333	0.43	0.423333	0.373333
93732	Acox2	Cholesterol synthesis	0	0	0.31	0.536667	0.5	0.88	2.45333	1.65	2.94333	4.32333	6.03667	8.68333	9.62	4.43333	6.31333
208665	Akr1d1	Cholesterol synthesis	0	0	0.13	0.18	0.476667	1.26333	3.45333	4.89667	13.8667	19.5033	33.1733	66.1533	67.5333	42.3167	25.31
17117	Amacr	Cholesterol synthesis	0.0366667	0.69	0.83	0.693333	0.716667	2.16333	1.60333	3.43667	5.82333	14.92	19.36	27.5933	17.31	9.51667	9.45333
12012	Baat	Cholesterol synthesis	0	0	0	0	0	0	0	0.08	0.803333	0.643333	1.12	0.726667	7.34	7.44	10.6533
104086	Cyp27a1	Cholesterol synthesis	0	0	0	0	0	0	0.06	0.35	0.88	0.34	1.12	0.93	5.95333	9.26	13.48
56050	Cyp39a1	Cholesterol synthesis	0	0	0.0433333	0.0433333	0.153333	0.413333	1.19	2.66	6.59	3.58333	5.08333	1	1.28	0.69	0.46
13122	Cyp7a1	Cholesterol synthesis	0	0	0	0	0	0	0	0	0	0	0	0	0.203333	0.0666667	0.146667
13124	Cyp8b1	Cholesterol synthesis	0	0	0	0	0	0	0.413333	0.7	0.66	1.61667	1.21	0.71	0.64	1.26333	3.51333
74754	Dhcr24	Cholesterol synthesis	0.22	0.403333	0.71	1.01	1.55	2.34333	1.64	0.33	1.59667	2.78	2.02	0.64	1.82	0.863333	1.08667
13360	Dhcr7	Cholesterol synthesis	0.413333	0.556667	0.84	0.856667	1.22	2.12333	3.79333	2.13667	3.28333	2.21333	2.39667	0.706667	2.17667	2.41333	1.91667
13595	Ebp	Cholesterol synthesis	0.436667	0.836667	1.70333	1.78667	2.16333	4.52667	7.06	8.19667	15.52	20.8733	25.0533	25.83	41.63	37.1067	11.34
14137	Fdft1	Cholesterol synthesis	0.263333	0.223333	0.523333	0.553333	0.586667	1.04	1.29333	0.333333	0.316667	0.24	0	0	1.23	0.343333	0.263333
110196	Fdps	Cholesterol synthesis	3.85333	3.49333	8.74333	6.7	13.2467	17.3433	21.68	18.1967	17.46	6.82	1.76667	0.586667	13.41	15.3933	10.07
15357	Hmgcr	Cholesterol synthesis	0.216667	0.28	0.266667	0.253333	0.236667	0.403333	0.333333	0	0.3	0.0866667	0	0	0.22	0	0
208715	Hmgcs1	Cholesterol synthesis	4.01	4.58333	7.89667	6.71667	7.73333	11.7967	12.2233	18.74	33.1467	53.7467	80.73	91.8367	42.3967	33.16	14.14
15488	Hsd17b4	Cholesterol synthesis	1.78	1.45	2.04333	2.04	3.33	3.3	7.13667	10.5733	35.5667	48.1267	54.4767	59.3833	47.2167	40.05	49.2367
15490	Hsd17b7	Cholesterol synthesis	0.02	0	0.0433333	0.0766667	0	0	0.283333	0.363333	0.4	0.293333	0.48	0.143333	0.493333	0.29	0.373333
101502	Hsd3b7	Cholesterol synthesis	0	0	0	0	0	0	0.126667	0.183333	0.516667	0.91	1.6	1.61333	0.87	0.7	0.79
319554	Idi1	Cholesterol synthesis	1.72333	1.82667	2.2	2.25	2.95667	3.92	4.67667	2.71	4.68667	2.00333	1.15667	0.09	6.10333	5.15	2.98333
98386	Lbr	Cholesterol synthesis	2.64667	3.32333	2.71667	2.25333	2.62333	2.34	1.56333	1.87333	2.12333	1.44333	1.53667	0.586667	0.666667	0.346667	0.343333
16987	Lss	Cholesterol synthesis	0.35	0.55	1.48333	1.57	2.05667	3.57333	5.26667	2.82	2.43333	1.60667	1.24667	0.806667	1.00333	0.473333	0.326667
192156	Mvd	Cholesterol synthesis	0.243333	0.333333	0.51	0.346667	0.82	0.876667	1.30333	0.76	0.776667	0.183333	0	0	0.57	0.613333	0.283333
17855	Mvk	Cholesterol synthesis	0.11	0.143333	0.383333	0.503333	0.443333	0.623333	1.09	0.786667	0.866667	0.296667	0	0	1.27	0.54	0.713333
18194	Nsdhl	Cholesterol synthesis	0.53	0.686667	1.28	0.966667	0.956667	2.39	4.42333	2.19333	2.47667	2.12	0.853333	0.29	2.63667	3.69333	2.27667
68603	Pmvk	Cholesterol synthesis	0.41	0.83	0.606667	0.53	0.616667	0.65	1.14333	0.196667	0.153333	0.273333	0	0	1.18	0.343333	0.733333
20280	Scp2	Cholesterol synthesis	2.23333	2.17333	5.15333	5.61	5.90667	11	17.08	34.0667	109.477	183.617	213.183	378.93	158.127	192.89	357.46
26458	Slc27a2	Cholesterol synthesis	0.163333	0.296667	0.856667	0.7	1.18	2.27667	3.78667	8.59667	32.1967	54.8567	67.1867	70.1867	38.58	28.92	27.6133
26459	Slc27a5	Cholesterol synthesis	0	0	0	0.0133333	0	0.103333	0.546667	1.00667	3.57333	6.94	9.98333	15.44	16.5467	12.9133	11.49
20775	Sqle	Cholesterol synthesis	0.14	0.09	0.263333	0.26	0.273333	0.563333	0.386667	0	0.323333	0.453333	0	0	0.136667	0.153333	0.05
73166	Tm7sf2	Cholesterol synthesis	0	0	0.0966667	0.116667	0.193333	0.393333	0.53	0.403333	0.513333	0.516667	0.676667	0.34	0.39	2.41333	1.04667
26874	Abcd2	Fatty acid metablic process	0	0	0	0	0	0.173333	1.02333	0.906667	3	3.73667	5.08	3.13667	1.07	0.483333	0
11364	Acadm	Fatty acid metablic process	1.69	1.85333	3.98333	4.15667	7.11	15.4	31.28	41.6167	75.5067	80.8367	88.9167	118.007	60.85	49.58	35.6967
11409	Acads	Fatty acid metablic process	2.6	1.46333	3.11333	3.49	3.69333	7.05	10.9833	14.3267	30.69	48.1833	61.25	89.36	70.68	48.71	36.0267
66885	Acadsb	Fatty acid metablic process	0.243333	0.2	0.283333	0.423333	0.45	0.633333	0.76	1.09	1.61	1.56	2.19333	4.31667	6.13	6.31	7.09667
11370	Acadvl	Fatty acid metablic process	0.713333	0.84	1.77	1.41333	1.84667	3.86667	4.50333	11.6833	36.5633	45.84	66.5067	80.3433	53.4933	31.09	27.3333
26897	Acot1	Fatty acid metablic process	1.00667	0.833333	1.42667	1.46667	1.10667	2.08333	1.75	3.90333	8.39667	3.90333	4.14667	0	0.5	2.78	2.10333
74156	Acot12	Fatty acid metablic process	0	0	0	0	0	0	0.206667	0.4	0.93	1.37333	2.98333	2.55	2.67	1.69333	1.13333
171210	Acot2	Fatty acid metablic process	0.6	1.00667	1.96333	1.36667	1.28333	1.76667	1.41	3.84	7.75667	4.37	5.76333	3.71333	0.803333	2.86667	0
171282	Acot4	Fatty acid metablic process	0.0933333	0.123333	0.226667	0.456667	0.403333	0.516667	0.466667	1.42667	4.5	3.68667	4.14333	2.86333	1.42333	3.03667	0.736667
56360	Acot9	Fatty acid metablic process	0.0666667	0.05	0.0533333	0.0533333	0.0533333	0.07	0	0.0666667	0.0866667	0.17	0.0733333	0.123333	0	0	0.0133333
80911	Acox3	Fatty acid metablic process	0	0	0.0166667	0	0	0	0.03	0.0133333	0.166667	0.0466667	0.0833333	0.1	0.0933333	0.183333	0.266667
214579	Aldh5a1	Fatty acid metablic process	0.15	0.2	0.356667	0.483333	0.58	1.01333	1.57667	2.08333	4.36667	3.72	4.68333	7.68667	8.84333	9.98333	6.76333
11684	Alox12	Fatty acid metablic process	0.0566667	0.0733333	0.0166667	0	0	0	0	0.2	0.0466667	0	0	0	0	0	0
69772	Bdh2	Fatty acid metablic process	0	0	0	0	0	0	0	0	0	0	0	0	0	0	0.536667
12189	Brca1	Fatty acid metablic process	0.00666667	0.0133333	0	0.0166667	0	0	0	0	0	0	0	0	0	0	0
12894	Cpt1a	Fatty acid metablic process	0	0	0.03	0	0.07	0.16	0.346667	2.79333	7.36333	9.11333	15.87	17.1167	6.61667	4.94667	4.45667
12895	Cpt1b	Fatty acid metablic process	0	0	0	0	0	0	0.01	0.17	0.55	0.623333	0.736667	0	0	0	0
74114	Crot	Fatty acid metablic process	0.0733333	0.16	0.403333	0.26	0.326667	0.36	0.18	1.78667	5.22333	8.75	11.4933	15.9667	5.86	4.61	3.35333
13244	Degs1	Fatty acid metablic process	0.116667	0.06	0	0	0	0	0	0	0	0	0	0	0	0	0
51798	Ech1	Fatty acid metablic process	0.26	0.28	0.573333	0.526667	0.78	2.07	2.50333	7.78333	22.2367	25.3767	37.83	26.4367	14.96	12.38	4.95667
93747	Echs1	Fatty acid metablic process	2.21667	3.07333	4.82667	5.18	5.85667	10.6267	16.7467	25.54	56.4167	44.7233	66.5467	101.157	95.6867	70.5867	56.6133
23986	Eci2	Fatty acid metablic process	0.0766667	0.1	0.16	0.11	0.126667	0.283333	0.596667	1.07333	2.25	3.65667	6.49	9.19333	4.97667	4.02333	4.32
14073	Faah	Fatty acid metablic process	0	0	0.0333333	0.0633333	0.106667	0.306667	0.51	0.363333	1.00667	3.37333	2.77	4.29667	4.93333	2.30667	4.99333
76267	Fads1	Fatty acid metablic process	0.14	0.0866667	0.17	0.136667	0.166667	0.233333	1.13667	0.656667	1.47	3.37333	2.34	1.76667	2.24	1.25333	0.99
56473	Fads2	Fatty acid metablic process	0.27	0.316667	0.24	0.226667	0.273333	0.323333	0.796667	0.71	2.02667	3.29333	3.36333	1.92	2.87667	1.69333	0.91
107146	Glyat	Fatty acid metablic process	0	0	0	0	0	0	0	0	1.49	9.69333	12.8467	23.2367	26.1733	32.65	43.2733
14712	Gnpat	Fatty acid metablic process	0.0766667	0.08	0.0233333	0.03	0.01	0.04	0.04	0	0.0666667	0	0.07	0	0.0166667	0	0.186667
56794	Hacl1	Fatty acid metablic process	0	0	0.05	0.116667	0.05	0.876667	2.72667	4.24667	15.4533	20.65	28.0167	30.31	49.7933	29.1767	20.0667
231086	Hadhb	Fatty acid metablic process	5.39	6.95667	10.0467	9.26333	10.6967	21.9	31.0833	58.47	157.297	195.897	282.403	313.027	160.363	105.39	130.787
15112	Hao1	Fatty acid metablic process	0	0	0	0.17	0	1.36333	4.72333	5.21667	19.0967	47.48	60.6767	61.3033	17.2167	9.36	8.87667
56185	Hao2	Fatty acid metablic process	0	0	0.363333	0.103333	0.13	0.58	5.92333	0.73	3.49667	4.53667	6.08	13.7	7.16333	0.146667	0
15446	Hpgd	Fatty acid metablic process	0	0	0.236667	0.25	0	1.60333	1.21	0.936667	1.63	2.09	2.67	4.98333	9.56333	7.53	6.81
16993	Lta4h	Fatty acid metablic process	1.81333	1.56	2.19667	1.66333	1.85667	2.39667	3.01667	3.18667	3.99	3.32	3.80667	3.19333	3.15333	2.89667	3.38
223722	Mcat	Fatty acid metablic process	0.153333	0.0766667	0.09	0.103333	0.08	0.17	0.223333	0.326667	0.853333	0.96	1.33667	1.78	1.03667	0.45	0.356667
17319	Mif	Fatty acid metablic process	25.9067	25.11	26.1167	20.1233	23.3	27.65	53.4667	75.8767	124.143	73.48	76.29	55.29	38.3033	43.1133	52.1533
56690	Mlycd	Fatty acid metablic process	0	0	0.0166667	0.05	0.04	0.176667	0.103333	0.33	0.853333	1.87	3.24667	3.41667	5.89667	5.67667	2.81667
71147	Oxsm	Fatty acid metablic process	0	0	0.0466667	0	0	0.173333	0	0.11	0.29	1.27333	2.23	2.65333	2.36	1.15	1.97667
192654	Pla2g15	Fatty acid metablic process	0	0.06	0.313333	0.123333	0.0466667	0.0433333	0	0.05	0.1	0.38	0.546667	0.89	0.123333	0.263333	0.66
67452	Pnpla8	Fatty acid metablic process	0	0	0	0	0	0	0	0	0.133333	0.06	0.183333	0.246667	0.13	0.17	0.123333
19224	Ptgs1	Fatty acid metablic process	0.0466667	0.07	0.143333	0.0866667	0.126667	0.2	0.216667	0.243333	0.39	0.483333	0.67	0.27	0.406667	0.25	0.5
26458	Slc27a2	Fatty acid metablic process	0.163333	0.296667	0.856667	0.7	1.18	2.27667	3.78667	8.59667	32.1967	54.8567	67.1867	70.1867	38.58	28.92	27.6133
26459	Slc27a5	Fatty acid metablic process	0	0	0	0.0133333	0	0.103333	0.546667	1.00667	3.57333	6.94	9.98333	15.44	16.5467	12.9133	11.49
27410	Abca3	Drug metabolism	0	0.0133333	0.0166667	0.01	0.00666667	0	0	0	0	0	0.11	0	0	0	0
18670	Abcb4	Drug metabolism	0	0	0.0166667	0.0266667	0.0866667	0.02	0.11	0.23	0.48	0.613333	1.78667	1.13	0.26	0.22	0.406667
27421	Abcc6	Drug metabolism	0	0	0.0166667	0.0233333	0.02	0.06	0.0966667	0.146667	0.22	0.416667	0.603333	1.38	0.9	0.606667	0.543333
26357	Abcg2	Drug metabolism	0.33	0.416667	0.43	0.573333	0.383333	0.226667	0.223333	0.163333	0.166667	0.596667	1.39333	0.236667	0.82	1.37	2.54
26876	Adh4	Drug metabolism	0	0	0	0	0	0	0	0	0	0	0	0	0.0966667	0.693333	2.11667
11532	Adh5	Drug metabolism	3.14	3.1	5.01333	5.99	7.39667	15.0733	29.51	34.6367	52.98	46.7267	57.3367	75.2733	87.8533	85.1733	94.17
67689	Aldh3b1	Drug metabolism	0	0	0	0	0.04	0.04	0.0566667	0.0333333	0.09	0.0966667	0.08	0	0	0	0
11761	Aox1	Drug metabolism	0	0	0	0	0	0	0	0	0	0	0	0	0.0766667	0.303333	1.32667
72269	Cda	Drug metabolism	0	0	0	0	0	0	0	0	0.306667	0.89	0.913333	1.47333	1.54333	0.35	0
51797	Ctps	Drug metabolism	1.82667	1.53667	0.973333	1.16667	0.84	1.16667	0.693333	1.07333	1.46333	1.08333	0.36	0.146667	0.256667	0.633333	0.236667
13077	Cyp1a2	Drug metabolism	0	0	0	0	0	0	0	0	0.343333	1.27667	1.94333	5.98	19.6167	11.3633	19.06
13106	Cyp2e1	Drug metabolism	0	0	0	0	0	0	0.83	8.25667	41.28	61.7433	97.5933	90.2733	72.17	38.99	44.61
99586	Dpyd	Drug metabolism	0	0	0.106667	0.0466667	0.183333	0.193333	0.583333	1.3	2.74333	3.29667	4.85667	5.63667	8.33333	7.99333	5.9
64705	Dpys	Drug metabolism	0	0.01	0.27	0.376667	0.556667	3.75	5.05667	6.28333	13.4367	20.9867	40.74	56.3667	61.9833	41.32	25.3133
14261	Fmo1	Drug metabolism	0	0	0.26	0.593333	0.776667	1.89333	3.74	2.18333	5.61333	7.31667	7.36	11.5933	16.48	11.8533	6.21667
55990	Fmo2	Drug metabolism	0	0	0	0	0	0	0	0	0	0	0	0.453333	0.803333	0.146667	0.136667
14262	Fmo3	Drug metabolism	0	0	0	0	0	0	0	0	0	0	0	0.56	20.1133	14.7033	0
226564	Fmo4	Drug metabolism	0	0	0	0	0	0.0333333	0.336667	0.256667	0.156667	0.19	0.73	0.423333	0.56	0.93	0.0333333
14263	Fmo5	Drug metabolism	0	0.0666667	0.29	0.246667	0.356667	0.63	1.82333	2.47333	6.80333	7.49333	10.29	14.04	28.5267	47.7	48.51
14630	Gclm	Drug metabolism	3.73	3.42	2.99	2.67667	2.43333	2.22	3.36667	2.90667	3.92333	4.76	5.77	7.27333	6.85333	5.19333	4.44667
229363	Gmps	Drug metabolism	3.20333	3.02667	2.34333	1.83	1.81	1.97	1.75	2.25333	3.59667	2.55667	3.56333	3.34333	1.70333	1.76	1.46
14859	Gsta3	Drug metabolism	0	0.353333	8.18333	10.4833	17.2833	34.62	98.18	74.12	125.92	169.437	167.863	399.19	839.08	713.473	834.287
14860	Gsta4	Drug metabolism	0.296667	0.493333	1.57333	1.55667	2.23667	5.98	15.6733	10.0233	19.55	25.24	27.9967	43.11	58.9133	35.8867	65.7867
76263	Gstk1	Drug metabolism	0	0	0.0366667	0.0466667	0.0533333	0.06	0.17	0.46	1.56667	3.33333	7.73	19.5667	28.7267	28.4833	21.8467
14862	Gstm1	Drug metabolism	8.01333	13.44	26.9	23.95	26.22	41.8167	46.35	45.9533	70.4	69.08	102	103.173	688.267	569.95	841.083
14863	Gstm2	Drug metabolism	0.746667	0.863333	2.01667	2.68	2.63333	4.85333	5.01	5.12	10.4	7.96	9.50667	13.0267	84.0033	64.79	100.97
14864	Gstm3	Drug metabolism	0.5	1.50333	5.24333	4.38667	5.53333	6.77667	5.78667	10.3733	21.3733	10.91	13.1833	18.1267	160.517	107.267	183.637
14865	Gstm4	Drug metabolism	0	0.403333	1.19	1.10667	0	1.35	3.03667	1.93333	4.61	3.71667	4.72667	6.41333	28.52	24.7667	37.06
14866	Gstm5	Drug metabolism	1.45333	1.05	1.56667	1.89333	2.15	2.62667	2.65333	2.64	3.25667	3.50333	3.43	3.54667	7.95333	9.27667	14.4133
14873	Gsto1	Drug metabolism	3.75333	3.12	5.97333	5.02333	6.03	10.9933	13.96	15.7667	36.05	28.59	36.7733	26.5467	34.64	38.6133	32.6733
14870	Gstp1	Drug metabolism	4.28667	6.44333	14.9833	8.3	8.24667	14.6567	19.09	20.6267	43.74	47.9	63.7333	53.11	73.0433	198.5	1505.6
14871	Gstt1	Drug metabolism	1.75	1.3	4.68333	5.91333	7.87	15.39	25.6267	24.08	25.3267	24.4533	32.9567	39.8167	61.8433	47.51	38.4833
14872	Gstt2	Drug metabolism	0.193333	0.27	0.806667	0.946667	1.3	1.69333	1.73	2.58	7.84667	7.11333	10.5733	4.66333	3.3	12.1233	4.44667
14874	Gstz1	Drug metabolism	1.84	2.72667	5.10667	6.64	8.08	17.09	22.53	40.3433	44.1633	100.563	112.793	204.093	284.16	184.353	225.803
110006	Gusb	Drug metabolism	0.226667	0.176667	0.21	0.17	0.213333	0.233333	0.22	0.563333	0.993333	0.606667	1.39	0.94	0.5	0.586667	0.43
23917	Impdh1	Drug metabolism	0.733333	0.746667	0.306667	0.14	0.206667	0.116667	0.11	0.196667	0.256667	0.253333	0.3	0	0	0	0.04
16434	Itpa	Drug metabolism	3.90667	3.25667	1.73333	2.30333	2.42667	1.79667	1.91	2.29	3.15333	4.57	3.65333	4.32333	5.47667	2.01333	3.93667
16890	Lipe	Drug metabolism	0	0	0	0	0	0	0	0	0.01	0.0133333	0.00666667	0	0.0366667	0	0.0133333
17161	Maoa	Drug metabolism	0.2	0.246667	0.343333	0.443333	0.6	0.98	1.13667	1.57667	1.96333	3.03333	3.56667	5.39	4.42	4.18333	2.82333
109731	Maob	Drug metabolism	0.31	0.496667	1.41333	1.59	1.88	3.44	4.92667	5.33667	12.6667	15.4933	18.58	41.8233	34.6967	31.0767	15.67
56615	Mgst1	Drug metabolism	0	0	2.79333	2.42	5.23	7.65333	16.2433	18.2533	57.24	124.343	125.54	158.18	123.677	488.097	406.5
66447	Mgst3	Drug metabolism	1.30333	1.00667	1.39	1.34	1.79667	1.33	0.903333	0.796667	1.47	1.17333	1.60667	1.18667	0.686667	0	0.393333
78388	Mvp	Drug metabolism	0.08	0.09	0.243333	0.16	0.303333	0.236667	1.04	1.33333	0.983333	3.67667	1.76333	2.46	2.51667	3.00333	5.45
17961	Nat2	Drug metabolism	0.0566667	0.233333	0.3	0.08	0.03	0.0533333	0	0.303333	0.233333	0.45	0.84	0.943333	1.37333	1.50333	1.17333
18400	Slc22a18	Drug metabolism	0	0	0.0266667	0	0	0.0233333	0	0.0633333	0	0.506667	1.16667	1.43667	0.666667	1.02333	0.51
20655	Sod1	Drug metabolism	75.5467	55.11	89.5933	67.7333	65.85	114.037	134.683	169.927	281.96	285.65	407.427	564.823	809.427	804.357	983.22
21877	Tk1	Drug metabolism	0.73	0.68	1.14667	1.09667	0.706667	0.44	0.233333	0.17	0.17	0	0	0	0	0	0
21969	Top1	Drug metabolism	4.25	1.54333	1.79	1.45333	1.72333	1.50333	1.15667	1.26	1.63	0.98	0.643333	2.59	0.69	0.54	0.37
22017	Tpmt	Drug metabolism	0.1	0.07	0.35	0.323333	0.593333	0.956667	1.24	2.11333	5.60667	8.76333	16.3067	23.51	17.7967	9.80333	14.2933
72962	Tymp	Drug metabolism	0	0	0	0	0	0	0	0	0	0.0433333	0.323333	0.566667	0	0.496667	0.02
22245	Uck1	Drug metabolism	0.243333	0.216667	0	0	0.07	0	0	0	0	0.176667	0	0.3	0	0	0.156667
80914	Uck2	Drug metabolism	0.533333	0.723333	0.13	0	0	0	0	0	0	0	0	0	0	0	0
68556	Uckl1	Drug metabolism	0	0	0.516667	0	0	0	0	0	0	0	0	0	0	0	0
394436	Ugt1a1	Drug metabolism	0	0	0	0	0	0	1.08333	3.4	10.82	28.04	33.6533	28.6733	36.5033	21.8833	15.0867
394433	Ugt1a5	Drug metabolism	0	0	0	0	0	0	0	0	0	0	0	0	2.74	3.61	2.39667
394434	Ugt1a9	Drug metabolism	0	0	0	0	0	0	0	0	0	0	2.94667	2.5	2.71	4.05667	3.56667
72094	Ugt2a3	Drug metabolism	0	0	0	0	0	0	0	0	0.11	0.206667	2.16	2.48	2.45	8.74667	12.4933
22247	Umps	Drug metabolism	4.87333	3.89667	9.13333	2.57667	3.20667	4.35333	2.33667	5.57333	5.57333	3.91667	2.35667	2.41	4.18333	3.70333	1.01333
103149	Upb1	Drug metabolism	0	0	0.176667	0.273333	0.45	1.01	1.21	2.24333	4.42333	8.27333	14.0567	18.0567	9.29667	6.08333	5.30333
76654	Upp2	Drug metabolism	0	0	0	0	0	0	0	0.89	0	0	0	0.103333	0	0.143333	0
22436	Xdh	Drug metabolism	0	0	0	0	0	0	0.0133333	0.0266667	0.0533333	0.48	0.896667	1.31333	3.27	4.32	4.09667
14058	F10	Coagulation	0	0	0.44	0.1	0.39	0.15	0.37	0.283333	0.306667	0.76	0.743333	0.663333	1.01667	0.29	0
109821	F11	Coagulation	0	0	0	0.01	0	0.183333	0.126667	0	0.0433333	0	0.02	0	0	0	0
16456	F11r	Coagulation	0.15	0.2	0.22	0.236667	0.116667	0.21	0.44	0.383333	0.693333	0.746667	1.09667	0.63	1.46	0.586667	4.99
58992	F12	Coagulation	0	0	0	0	0	0	0	0	0.0366667	0.0433333	0.0633333	0	0.0533333	0	0.11
74145	F13a1	Coagulation	0.136667	0.07	0.16	0.166667	0.133333	0.206667	0.196667	0.333333	0.29	0.146667	0.11	0	0	0	0
14060	F13b	Coagulation	0	0	0	0	0	0	0.0766667	0	0	0	0	0	0	0	0
14061	F2	Coagulation	0.0566667	0.0966667	0.28	0.573333	0.3	0.706667	1.14333	0.523333	1.04667	1.54333	2.29667	2.22667	1.42	1.15667	0.933333
14067	F5	Coagulation	0	0	0	0.01	0	0.01	0.01	0	0.03	0.0433333	0.0233333	0.0233333	0	0	0
14068	F7	Coagulation	0	0	0	0	0	0	0	0	0	0	0.01	0	0	0	0
14070	F8a	Coagulation	0	0	0.0266667	0	0	0.0266667	0	0	0	0.08	0	0	0.0366667	0	0.0633333
14071	F9	Coagulation	0	0	0	0	0	0	0	0	0	0	0	0	0.1	0.373333	0.06
22371	Vwf	Coagulation	0.03	0.03	0.0133333	0.0466667	0.0566667	0.156667	0.0433333	0.136667	0.246667	0.07	0.353333	0.0333333	0.01	0	0.00666667
12260	C1qb	Complement	0	0	0	0	0	0	0.0433333	0	0	0	0	0	0	0	0
12261	C1qbp	Complement	11.5	6.80333	7.57	4.59	4.8	6.11667	5.82333	9.51667	10.9333	7.43333	12.3233	9.44667	9.9	7.31333	9.50333
12262	C1qc	Complement	0	0	0.0466667	0	0	0	0	0	0	0.21	0.24	0	0	0	0
50909	C1ra	Complement	0	0	0	0	0	0	0	0	0	0	0.0466667	0	0	0.0433333	0.0333333
12263	C2	Complement	0	0	0	0.0133333	0	0.01	0	0	0	0.0266667	0	0	0	0	0.04
12266	C3	Complement	0.03	0	0.53	0.433333	0.733333	1.83	2.87	1.55667	4.07667	8.02667	5.78667	4.98667	5.27	3.61333	2.64333
12268	C4b	Complement	0	0	0	0	0	0	0.106667	0.0566667	0.333333	0.333333	0.34	0.236667	0.52	0.31	0.35
12269	C4bp	Complement	0	0	0	0	0	0	0	0	0	0	0	0	0.29	0.18	0.406667
12274	C6	Complement	0	0	0	0	0	0	0	0	0	0	0	0	0	0	0.183333
109828	C7	Complement	0	0	0	0	0	0	0	0	0	0	0	0	0	0	0.0333333
230558	C8a	Complement	0	0	0	0	0	0	0	0	0	0.07	0	0.0133333	0.0366667	0.08	0.343333
110382	C8b	Complement	0	0	0.0633333	0.1	0.183333	0.646667	0.826667	0.0866667	0.0366667	0.0266667	0.01	0.05	0.15	0.12	0.24
69379	C8g	Complement	0	0	0	0	0	0	0	0	0	0.163333	0	0.216667	0.33	0.61	0.923333
12279	C9	Complement	0	0	0	0	0	0	0	0	0	0	0	0	0	0	0.25
77559	Agl	Glycogenlysis	0.08	0.0766667	0.273333	0.24	0.253333	0.686667	1.06	1.06667	1.70333	1.93333	2.23	2.74333	4.83	5.4	5.68
18679	Phka1	Glycogenlysis	0	0	0	0	0	0	0	0	0	0	0	0	0	0	0.0333333
110094	Phka2	Glycogenlysis	0	0	0	0	0	0	0	0	0	0.0133333	0.0133333	0.0866667	0.0266667	0.02	0.0666667
102093	Phkb	Glycogenlysis	0	0	0	0	0	0	0	0	0.0133333	0.03	0	0.0266667	0.0666667	0.0733333	0.106667
68961	Phkg2	Glycogenlysis	0	0	0	0	0	0	0	0	0.106667	0.0533333	0.103333	0.0266667	0.133333	0.263333	0.376667
110078	Pygb	Glycogenlysis	0.606667	0.873333	1.56333	1.44	1.77	3.46667	4.76	5.09667	7.22667	6.25667	7.92	7.61333	5.65667	4.72333	8.46
110095	Pygl	Glycogenlysis	0.81	1.33333	3.58333	3.28667	5.19333	11.84	20.99	23.0467	28.2733	25.3867	33.08	43.21	61.1333	68.7567	70.19
19309	Pygm	Glycogenlysis	0.0933333	0.14	0.276667	0.273333	0.396667	1.43333	0.84	1.84333	2.96667	2.57667	2.63667	3.28667	3.12333	2.34	7.6
12398	Cbfa2t3	Hematopoiesis	0.0433333	0.02	0	0	0	0	0	0	0	0	0	0	0	0	0
12490	Cd34	Hematopoiesis	0	0.0566667	0	0	0	0	0	0	0	0	0	0	0	0	0
12562	Cdh5	Hematopoiesis	0.02	0.0633333	0.03	0.05	0.03	0	0.0866667	0.116667	0.0666667	0.0966667	0.216667	0.0833333	0.03	0	0.0333333
109006	Ciapin1	Hematopoiesis	0.843333	0.73	0.59	0.48	0.413333	0.256667	0.44	0.57	0.623333	0.303333	0.416667	1.31667	0.343333	0	0.323333
14460	Gata1	Hematopoiesis	0.946667	0.706667	0.573333	0.353333	0.483333	0.176667	0	0	0	0	0	0	0	0	0
14582	Gfi1b	Hematopoiesis	0	0.0433333	0	0	0	0	0	0	0	0	0	0	0	0	0
16571	Kif4	Hematopoiesis	0.356667	0.44	0.243333	0.28	0.246667	0.166667	0.0566667	0.0766667	0.02	0	0	0	0	0	0
16590	Kit	Hematopoiesis	0.02	0.0133333	0.02	0.0533333	0.04	0.0133333	0	0.00666667	0.02	0	0.01	0	0	0	0.00666667
16596	Klf1	Hematopoiesis	0.123333	0	0	0	0	0	0	0	0	0	0	0	0	0	0
16825	Ldb1	Hematopoiesis	0.316667	0.213333	0.146667	0.0533333	0.103333	0	0	0	0	0	0	0	0	0	0
17268	Meis1	Hematopoiesis	0.0333333	0	0	0	0	0	0	0	0	0	0	0	0	0	0
233406	Prc1	Hematopoiesis	0.15	0.206667	0.17	0.0433333	0.0666667	0.0166667	0.0166667	0	0	0	0	0	0	0	0
20850	Stat5a	Hematopoiesis	0.193333	0.166667	0.183333	0.163333	0.136667	0.14	0.18	0.16	0.136667	0.176667	0.15	0.48	0.13	0.0766667	0.06
268860	Abat	Valine/Leucine/Isoleucine metabolism pathway	1.42	0.153333	0.673333	0.946667	2	3.86	7.74	12.6567	34.4133	17.1133	9.37	42.7933	43.39	43.0333	48.9767
113868	Acaa1a	Valine/Leucine/Isoleucine metabolism pathway	1.21	0.703333	1.07333	1.28	1.11	2.45	3.5	7.47333	20.7367	18.9667	23.44	29.2167	22.7167	22.91	17.8933
66948	Acad8	Valine/Leucine/Isoleucine metabolism pathway	0.07	0.426667	0.153333	0.16	0.176667	0.31	0.616667	1.13333	2.22333	5.01667	5.10333	9.72	6.59667	7.35667	6.31
11409	Acads	Valine/Leucine/Isoleucine metabolism pathway	2.6	1.46333	3.11333	3.49	3.69333	7.05	10.9833	14.3267	30.69	48.1833	61.25	89.36	70.68	48.71	36.0267
66885	Acadsb	Valine/Leucine/Isoleucine metabolism pathway	0.243333	0.2	0.283333	0.423333	0.45	0.633333	0.76	1.09	1.61	1.56	2.19333	4.31667	6.13	6.31	7.09667
110446	Acat1	Valine/Leucine/Isoleucine metabolism pathway	4.95333	4.54667	11.2667	12.24	13.7467	23.7167	49.63	67.5567	165.003	178.517	269.927	406.25	215.983	85.9367	70.59
104776	Aldh6a1	Valine/Leucine/Isoleucine metabolism pathway	0.27	0.486667	2.33333	2.25667	3.44	6.99667	12.4233	16.35	34.1333	41.4833	64.2867	98.0533	98.56	128.47	80.71
110695	Aldh7a1	Valine/Leucine/Isoleucine metabolism pathway	1.39	1.54667	3.01	3.44	4.65333	9.25	11.3667	14.0533	27.46	22.23	32.4367	47.69	56.3633	70.1067	96.16
71724	Aox3	Valine/Leucine/Isoleucine metabolism pathway	0	0	0	0	0	0.206667	1.00333	0.666667	1.22333	1.88	2.29667	2.08667	2.87	4.67333	20.9067
11992	Auh	Valine/Leucine/Isoleucine metabolism pathway	0	0.1	0.163333	0	0	0.146667	0.25	0.446667	0.786667	1.13667	2.02	3.05333	2.31667	1.84	1.77
12036	Bcat2	Valine/Leucine/Isoleucine metabolism pathway	0.766667	0.84	0.703333	0.596667	0.526667	0.513333	0.533333	0.303333	0.54	0.493333	0.246667	0.0533333	0	0	0
12039	Bckdha	Valine/Leucine/Isoleucine metabolism pathway	0.0433333	0.136667	0.323333	0.6	0.49	1.76	2.3	3.29667	5.99333	6.98333	9.99667	16.47	11.7967	6.65667	5.11
13171	Dbt	Valine/Leucine/Isoleucine metabolism pathway	0.293333	0.5	1.25667	1.56	2.06	4.67667	6.07667	9.84667	19.5533	20.44	32.4033	52.3033	39.5867	31.9067	20.4833
74147	Ehhadh	Valine/Leucine/Isoleucine metabolism pathway	0.0533333	0.143333	0.44	0.56	0.89	1.43	4.22333	30.56	78.23	55.1633	63.8067	44.1167	33.2233	31.35	25.6133
58875	Hibadh	Valine/Leucine/Isoleucine metabolism pathway	0.473333	0.32	0.656667	0.513333	0.54	1.2	1.75	2.35	7.82667	8.98667	13.58	29.0767	32.1933	29.4367	31.93
227095	Hibch	Valine/Leucine/Isoleucine metabolism pathway	0.343333	0.376667	0.58	0.566667	0.876667	1.08	1.55333	2.2	6.68333	7.84667	13.89	11.8533	18.8033	12.3433	19.2067
15356	Hmgcl	Valine/Leucine/Isoleucine metabolism pathway	0.663333	0.76	1.67667	1.14333	1.79	3.02	5.26	10.4733	19.3333	33.2667	38.6733	51.26	43.7033	30.7367	26.7267
15360	Hmgcs2	Valine/Leucine/Isoleucine metabolism pathway	1.11333	1.72	9.10667	8.35	14.4933	40.2733	98.0733	226.873	782.923	1100.4	1620.95	2130.12	768.733	344.56	259.25
15108	Hsd17b10	Valine/Leucine/Isoleucine metabolism pathway	3.1	2.89	5.19	4.72667	6.95333	12.4733	17.0333	31.8367	67.3967	53.8567	78.5333	101.373	93.9067	61.5667	66.43
56357	Ivd	Valine/Leucine/Isoleucine metabolism pathway	0.55	0.646667	2.05667	1.71	1.87	4.24667	5.23333	7.53667	16.0267	15.49	23.53	35.8267	52.4167	39.19	26.01
72039	Mccc1	Valine/Leucine/Isoleucine metabolism pathway	0.373333	1.09	1.04667	2.22333	1.17667	4.72333	3.99	3.26333	6.39	8.80667	7.49667	9.39	10.95	12.1667	7.98333
73724	Mcee	Valine/Leucine/Isoleucine metabolism pathway	0	0	0	0	0	0	0	0.68	0.8	0.38	2.57667	2.54333	3.70333	2.64333	2.88
110821	Pcca	Valine/Leucine/Isoleucine metabolism pathway	0.14	0.0933333	0.233333	0.356667	0.436667	0.78	1.73333	2.13667	4.08	5.72	8.10333	11.4333	11.3167	11.1233	7.48

## Sheet: Sheet2
GeneID	GeneSymbol	Candidate.marker	E12.5	E13.5	E14.5	E15.5	E16.5	E17.5	E18.5	D1	D3	D5	W1	W2	W3	W6	W8
12306	Anxa2	hepatic stellate cells	5.05333	5.15667	8.06333	8.67	10.9233	21.4567	26.7067	25.8733	28.0933	23.08	19.3633	14.46	6.98	4.01667	2.31
11745	Anxa3	hepatic stellate cells	0.433333	0.493333	0.66	0.956667	0.883333	0.82	1.14	2.07333	5.55	1.71	5.02333	0.673333	1.12	0.98	1.20333
13346	Des	hepatic stellate cells	1.06	0.803333	0.6	0.62	0.663333	1.24	1.62333	1.82667	2.45667	3.53333	3.84	3.51333	1.35333	1.63	1.30667
19326	Rab11b	hepatic stellate cells	4.10333	3.23333	3.41	2.65	2.74667	3.38	4.3	4.12667	5.65667	6.82333	6.59	4.81333	4.93333	3.29	3.35333
19349	Rab7	hepatic stellate cells	6.34	6.95333	8.07333	8.70333	8.66333	12.0267	11.0933	11.05	18.0433	18.4533	18.62	13.9533	20.2833	9.26333	11.6567
19659	Rbp1	hepatic stellate cells	9.62	6.43333	14.75	12.2733	14.6467	25.29	28.3333	37.0867	45.34	47.8867	46.7167	49.6467	27.3167	11.0333	4.14667
67804	Snx2	hepatic stellate cells	1.77333	1.98667	2.50667	3.32333	2.27333	3.80667	3.95	4.18667	5.44667	9.14667	6.98333	8.41	6.00667	3.94	3.87333
54198	Snx3	hepatic stellate cells	8.42667	5.91333	7.32667	8.63667	7.93667	7.32667	4.91667	8.59333	10.35	9.05	9.16333	8.09	9.03667	4.97333	5.71
69178	Snx5	hepatic stellate cells	2.68333	2.34667	2.43333	1.88667	1.94	2.11	2.84	3.68	4.74333	4.96	7.78	9.06	11.4067	4.53	5.46667
11889	Asgr1	hepatocytes	0	0	0	0	0	0	1.54	2.72333	10.6633	12.9533	13.97	13.2033	12.32	9.34333	12.3233
11890	Asgr2	hepatocytes	0	0	0	0	0	0	0	0	1.76	2.98	3.94667	4.44	5.23	2.58333	3.67
227231	Cps1	hepatocytes	0.0833333	0.136667	1.59667	2.07	6.60333	26.42	99.2567	390.317	772.663	522.203	928.67	1593.58	2611.89	2837.86	1947.51
14080	Fabp1	hepatocytes	5.60667	19.52	61.41	48.6767	63.37	134.73	244.713	630.103	1502.31	2481.28	2712.77	3864.83	4946.76	8331.06	7597.82
14870	Gstp1	hepatocytes	4.28667	6.44333	14.9833	8.3	8.24667	14.6567	19.09	20.6267	43.74	47.9	63.7333	53.11	73.0433	198.5	1505.6
16668	Krt18	hepatocytes	2.90333	3.52667	6.00333	6.40667	6.31667	12.1833	17.4933	27.76	37.1467	50.72	79.52	143.85	108.603	113.497	115.51
11657	Alb	hepatocytes	11.2033	15.9767	49.6033	70.8733	99.6133	235.697	234.82	314.517	124.317	395.393	540.517	611.647	874.37	961.487	696.54
13482	Dpp4	hepatocytes	0.0433333	0.06	0.183333	0.0733333	0.23	0.176667	0.633333	0.486667	0.796667	1.15	1.86333	4.94333	5.87	6.08333	7.43
15378	Hnf4a	hepatocytes	0	0.05	0.0433333	0	0.0833333	0.08	0.0533333	0.113333	0.11	0.17	0.08	0.176667	0.246667	0.156667	0.11
11746	Anxa4	intrahepatic cholangiocytes	2.01667	1.25333	1.95333	2.14	1.84667	4.09333	5.20667	5.88	8.1	7.24	10.9333	12.0067	10.9533	5.54333	6.03
11747	Anxa5	intrahepatic cholangiocytes	2.84333	2.83	5.04667	4.17667	4.88333	7.28	10.1433	13.13	17.14	17.48	23.92	22.7167	21.1933	15.5967	16.21
11749	Anxa6	intrahepatic cholangiocytes	3.09333	3.77667	6.04333	4.68	5.81667	9.16333	13.3333	15.6933	21.46	19.77	22.7267	20.5767	24.3233	16.8167	13.8967
16669	Krt19	intrahepatic cholangiocytes	0.936667	1.32333	0.753333	1.27	0.86	1.51333	2.33667	3.35	2.89	3.38667	6.64	9.49	4.16	5.12333	3.80333
20201	S100a8	Kuffer cells	0	0.243333	5.68667	3.10333	4.56	9.51667	16.36	5.79333	7.49667	0	4.86667	0	0	0	0
20202	S100a9	Kuffer cells	1.91333	2.19333	12.2433	10.3633	16.5233	21.4667	41.44	22.6367	13.8633	30.3133	12.8067	1.46667	0	0	0.443333
16409	Itgam	Kuffer cells	0	0	0.0533333	0.06	0.0433333	0.173333	0.23	0.07	0.11	0.0833333	0.14	0	0	0	0
192176	Flna	liver sinusoidal endothelial cells	2.29667	1.86	1.73667	1.42667	1.56333	2.03	2.37667	2.56667	3.13	3	2.80333	1.92	0.773333	0.576667	0.396667
21345	Tagln	liver sinusoidal endothelial cells	0.773333	1.30667	0.98	0.553333	0.72	1.27667	1.04667	2.07	3.19	3.25	2.46333	4.33667	2.17667	1.17667	0.83
21346	Tagln2	liver sinusoidal endothelial cells	15.3933	16.0633	14.67	15.58	14.26	15.2867	21.4433	19.7267	32.3233	22.2467	19.23	13.92	15.06	5.52333	3.91
56370	Tagln3	liver sinusoidal endothelial cells	0	0.893333	0.863333	0.473333	0.643333	0	0.553333	1.37667	0.783333	1.29333	0	0.193333	0	0	0
22003	Tpm1	liver sinusoidal endothelial cells	6.82667	6.44333	6.26667	5.12333	4.27333	5.18667	7.13333	7.51333	10.1133	11	12.02	12.5233	7.97333	5.41667	4.27333
56431	Dstn	liver sinusoidal endothelial cells	10.92	7.54667	8.97	8.52333	11.59	11.7567	22.64	25.1767	29.5133	32.9133	40.82	35.8833	38.0233	27.2433	34.8667

## Sheet: ReadMe
Supplementary Table S3. Liver function or cell-type specific proteins
Sheet1: Lists of proteins related to 8 liver functions
Sheet2: Lists of candidate markers related to 5 Hepatic Cell Types
