# Supplementary material for: A time-resolved multi-omic atlas of the developing mouse liver
Source: HighWire-hosted journal article supplement (doi:10.1101/gr.253328.119), 2020-02-01
Supplement: Supplemental_Table_S4.xlsx [file Supplemental_Table_S4.xlsx]

## Sheet: Sheet1
Gene.ID	GeneSymbol	E12.5 R1	E12.5 R2	E12.5 R3	E13.5 R1	E13.5 R2	E13.5 R3	E14.5 R1	E14.5 R2	E14.5 R3	E15.5 R1	E15.5 R2	E15.5 R3	E16.5 R1	E16.5 R2	E16.5 R3	E17.5 R1	E17.5 R2	E17.5 R3	E18.5 R1	E18.5 R2	E18.5 R3	D1 R1	D1 R2	D1 R3	D3 R1	D3 R2	D3 R3	D5 R1	D5 R2	D5 R3	W1 R1	W1 R2	W1 R3	W2 R1	W2 R2	W2 R3	W3 R1	W3 R2	W3 R3	W6 R1	W6 R2	W6 R3	W8 R1	W8 R2	W8 R3
667118	Zbed6	0	0	0	0	0	0	0	0	0	0	0	0	0	0	0	0	0	0	0	0	0	0	0	0	0	0	0	0	0	0	0	2.375	0	0	0	0	0	0	0	0	0	0	0	0	0
241944	Zfp267	0	0	0	0	0	0.003	0	0	0	0	0	0	0	0.006	0	0	0	0.035	0	0	0.039	0	0.01	0.019	0	0	0	0	0	0	0	0	0	0.085	0	0	0	0	0	0.18	0	0	0	0	0
11538	Adnp	1.054	1.743	1.797	0.862	2.318	1.355	0.862	0.28	0	0	0	0	0	0	0	0	0	0	0	0	0	1.941	0	0	0	0	0.17	0	1.688	1.571	0.415	0.62	0	0	0.51	1.992	0.263	0	1.845	0	0	0	0	0	0
11622	Ahr	0	0	0	0	0	0	0	0	0	0	0	0	0	0	0	0	0	0	0	0	0	0	0	0	0	0	0	0	0	0	0	1.735	0	0	0	0	0	0	0	0	0	0	0	0	0
11624	Ahrr	0	0	0	0	0	0	0	0	0	0	0	0	0	0	0	0	0	0	0	0	0	0	0	0	0	0	0	0	0	0	0	0.09	0	0	0	0	0	0	0	0	0	0	0	0	0
11694	Alx3	0	0	0	0	0	0	0	0	0	0	0	0	0	0	0	0	0	0	0	0	0	0	0	0	0	0	0	0	0	0	0.96	0.567	0	0	0	0	0	0	0	0	0	0	0	0	0
11695	Alx4	0	0	0	0	0	0	0	0	0	0	0	0	0	0	0	0	0	0	0	0	0	0	0	0	0	0	0	0	0	0	0.595	0.351	0	0	0	0	0	0	0	0	0	0	0	0	0
11819	Nr2f2	404.83	327.956	452.521	166.853	177.932	193.482	131.969	202.264	77.246	42.133	72.855	51.813	119.852	87.129	62.29	89.726	92.52	108.249	52.924	25.529	24.766	76.852	77.355	45.941	76.525	65.741	58.251	78.691	81.901	84.995	229.591	193.806	214.629	254.839	253.876	244.789	337.696	325.709	378.884	395.632	208.604	193.271	155.275	194.172	171.941
11859	Phox2a	0	0	0	0	0	0	0	0	0	0	0	0	0	0	0	0	0	0	0	0	0	0	0	0	0	0	0	0	0	0	0.892	0.527	0	0	0	0	0	0	0	0	0	0	0	0	0
11863	Arnt	12.533	14.639	21.205	13.128	23.897	20.54	15.703	64.9	22.94	26.418	78.025	74.537	107.464	58.831	49.933	73.068	57.972	58.306	46.284	36.097	24.239	0	0.724	1.132	1.334	5.597	9.946	15.636	9.484	18.079	10.831	12.191	1.429	5.771	1.707	2.643	0	3.519	1.958	2.148	0.606	1.433	2.089	0	0
11864	Arnt2	0	0	0	0	0	0	1.637	0	0	0	0	0.015	0	0	1.419	0	0.309	0.348	0	1.789	0	0	0	0	0	0	0	0	0	0	0	0	0	0	0	0	0	0	0	0	0	0	0	0	0
11865	Arntl	1.433	6.259	9.934	8.711	27.359	12.164	13.18	11.019	29.714	6.411	9.288	12.59	21.069	26.623	14.26	33.207	362.368	454.65	50.645	339.872	128.279	88.306	324.803	262.138	24.599	8.299	8.396	29.218	20.28	29.824	69.91	55.552	1448.47	132.838	55.667	106.634	191.324	174.694	182.477	420.115	276.997	640.465	1541.02	303.948	396.854
11878	Arx	0	0	0	0	0	0	0	0	0	0	0	0	0	0	0	0	0	0	0	0	0	0	0	0	0	0	0	0	0	0	0.499	0.295	0	0	0	0	0	0	0	0	0	0	0	0	0
11906	Zfhx3	7.949	3.228	2.671	3.396	0.514	8.4	0.318	2.451	0.342	0.677	1.212	1.255	3.94	0.972	0.602	0	0.786	0.652	0.913	0.544	0.298	1.614	0.33	0.264	0.6	0.274	0.389	0.28	0.464	1.042	5.502	4.026	2.112	2.495	1.276	3.044	4.064	1.829	2.095	9.526	1.143	0.72	12.361	0.67	1.205
11908	Atf1	591.397	149.173	126.089	131.54	28.955	79.216	64.662	11.848	105.854	52.042	0	0	0	96.818	84.862	63.009	72.611	80.226	91.937	79.951	122.407	29.55	129.71	80.411	73.814	65.643	71.349	77.591	105.558	114.372	44.52	0.681	86.311	37.406	45.143	40.656	0	47.876	93.514	30.396	70.055	67.627	88.919	142.427	91.922
11909	Atf2	32.626	27.241	9.037	2.605	2.745	0.689	4.529	0.869	0.7	1.691	0.251	0.119	0	3.86	1.948	2.291	5.591	6.47	0	1.684	2.746	2.006	1.744	1.483	0	1.702	1.774	0	0	2.595	1.001	0.153	3.35	2.757	0	2.679	5.877	3.631	3.429	1.948	2.95	5.22	3.42	0	0
12013	Bach1	0	0.087	0	0	0	0	0	1.139	0.355	0	0.784	0.765	0	0	0	0	0.354	0	0	0	0	0	0	0	0	0	0	0	0	0	0	0	0	0.218	0	0	0	0	0.248	1.735	0	0	0	0	0
12022	Barx1	0.542	0	0	0	0	0	0	0	0	0	0	0	0	0	0	0	0	0	0	0	0	2.415	0	0	0	0	0	0	0	0	0	0.191	0	0	0	0	0	0	0	0	0	0	0	0	0
12029	Bcl6b	0	0	0	0	0	0	0	0	0	0	0	0	0	0	0	0	0	0	0	0	0	0	0	0	0	0	0	0	0	0	0	0	2.313	0	0	0	0	0	0	0	1.548	1.966	1.095	1.077	0.918
12053	Bcl6	0	0	0	0	0	0	0	0	0	0	0	0	0	0	0	0	0	0	0	0	0	0	0	0	0	0	0	0	0	0	0	0	53.608	0	0	0	10.246	11.044	0	33.783	16.261	34.268	0.713	14.072	0.598
12142	Prdm1	0	0	0	0.404	0	0	0	0	0	0	0.149	0	0.32	0	0	0	0	0	0	0	0	0.395	0	0	1.766	0	0	1.798	2.541	2.531	0.535	0	3.574	0	3.097	3.175	2.724	0	0	0.944	0	3.342	3.152	0	0
12173	Bnc1	0.117	0.27	0.186	0	0	0	0	0	0	0	0	0	0	0	0	0	0	0	0	0	0	0	0	0	0	0	0	0	0	0	0	0	0	0	0	0	0	0	0	0	0	0	0	0	0
12224	Klf5	3.285	0	1.439	3.881	0	0	1.861	1.867	0	0	0	0	0.488	0	1.473	0.809	0	0	0	0	0.576	2.872	0.731	0.616	1.107	0	1.022	0.811	0	0	0	0.872	0	0	0	0	0	0	0	0	0	0	0	0	0
12355	Nr1i3	0	0	0	0	0	0	0	0	0	0	0	0	0	0	0	0	0	0	0	0	0	9.495	1.549	0	0	0	0	0	0	0	8.558	1.243	0	4.363	5.957	5.074	0	26.451	0	18.185	14.961	26.388	0	0	0
12387	Ctnnb1	0	0.674	0	0	0.244	2.108	0	0.392	0	0	0	0	0.421	0	0	13.319	2.142	4.038	7.568	6.433	1.163	0	2.695	1.64	4.946	6.911	2.031	26.506	9.747	27.65	9.255	15.36	49.351	69.22	49.869	43.29	48.805	48.315	40.414	81.785	41.811	40.854	49.654	69.579	42.499
12393	Runx2	0	3.874	0.915	0	0.959	1.6	0.64	6.724	1.103	3.295	1.718	0.394	0	2.169	1.205	1.079	1.187	1.099	0	3.318	1.818	1.625	1.719	0.816	0	0	0	0	3.102	0	0.782	1.777	0	0	0	0	0	0	0	0	0	0	0	0	0
12394	Runx1	90.628	106.849	89.409	39.501	44.789	51.72	35.867	51.202	49.263	17.886	26.218	25.684	27.988	31.874	34.486	29.354	27.691	38.254	29.579	62.157	45.984	28.096	42.421	29.986	38.021	37.832	28.757	28.067	17.011	25.363	40.341	110.336	0	2.088	0	2.254	0	0	0	1.268	0	0	0	0	0
12399	Runx3	8.425	11.511	6.157	9.359	10.68	11.323	17.145	26.544	11.354	0	5.393	6.167	13.878	11.309	10.779	6.603	12.475	8.821	7.223	13.193	14.575	10.749	17.135	14.089	15.706	15.543	10.465	14.584	9.818	20.848	19.183	1.768	0	0	1.567	0	8.132	0	0	6.19	4.488	0	0	0	0
12400	Cbfb	48.831	9.522	7.308	63.782	21.014	47.929	72.734	178.051	21.255	64.132	151.909	90.382	99.607	73.532	89.065	94.009	91.293	72.62	120.989	98.077	117.355	79.357	69.502	48.301	49.777	42.226	19.178	52.886	31.53	0	83.298	101.719	4.431	0	0	5.321	4.49	0	0	6.225	3.414	2.387	0	0	0
12606	Cebpa	167.855	50.014	46.658	102.627	2.623	2.962	87.676	112.255	26.19	17.947	93.84	46.681	90.115	16.16	25.88	134.884	62.135	82.778	279.536	199.373	75.474	339.411	38.192	31.643	158.54	133.261	158.228	227.307	244.338	219.521	163.257	276.284	59.6	195.552	355.226	336.106	477.289	363.569	278.698	533.356	196.154	78.918	141.2	149.764	192.6
12607	Cebpz	3.2	5.828	4.921	0.488	6.121	3.427	4.038	16.374	4.576	0.166	2.204	2.742	9.753	6.276	1.699	6.539	5.145	3.648	8.082	4.188	5.88	1.481	4.87	5.314	2.536	0.861	2.625	1.123	1.744	0.677	9.373	45.453	0.652	0.48	0.586	0.627	1.381	0.801	2.891	6.637	1.537	1.719	2.19	1.57	1.405
12608	Cebpb	15.977	7.209	6.547	9.597	2.575	3.714	7.693	15.504	4.385	6.247	20.091	18.41	13.323	6.491	4.934	13.348	5.375	5.365	26.299	18.805	17.315	52.608	41.74	31.224	13.362	0	16.119	24.238	23.762	25.189	55.433	31.656	38.288	139.535	30.871	103.321	190.25	194.041	160.508	449.083	110.411	102.753	139.94	152.669	143.726
12609	Cebpd	0	0	0.727	0	0	0	0	2.431	0	0	7.748	0	0	0	0	0	0	0	3.035	5.203	4.612	1.799	8.457	8.311	0	0	0	0	0	0	0	0	0	0	0	0	0	0	0	0	0	0	0	0	0
12611	Cebpg	0	54.187	8.225	0	0	0	0	0	0	0	58.423	26.289	0	0	0	0	8.838	0	0	0	0	0	0	0	32.823	65.57	67.335	30.764	0	48.314	0	156.544	78.919	48.203	26.607	0	49.319	202.87	36.332	0	56.71	70.126	40.581	0	79.977
12615	Cenpa	0	0	0	0	0	0	0	0	0	0	0	0	0	0	7.694	0	0	0	12.032	3.283	6.384	0	6.72	5.81	0	0	0	0	0	0	0	0	0	0	0	0	0	0	0	0	0	0	0	0	0
12753	Clock	1.335	1.956	1.597	5.828	2.618	4.699	7.024	13.758	4.831	5.397	11.403	11.67	28.881	15.737	14.986	23.298	15.641	17.405	40.313	18.511	15.015	57.88	22.754	23.393	18.626	11.185	16.36	29.382	26.537	31.27	47.682	753.266	193.384	53.364	64.599	48.334	108.381	113.212	111.004	293.906	143.294	148.991	174.684	174.735	178.746
12912	Creb1	861.358	264.952	226.679	258.228	60.822	46.206	110.177	62.813	86.103	74.318	3.999	0	0	75.938	67.465	80.011	59.327	67.373	113.768	59.709	104.877	37.523	114.857	58.689	48.752	51.143	55.332	69.89	82.802	77.946	78.992	18.712	153.861	109.303	119.761	57.799	69.396	131.349	187.207	206.596	94.896	78.822	98.644	163.842	151.799
12915	Atf6b	0	0	0	0	0	0.637	0	0	0	0	0	0	0	0	0	0	0	0	0	0	0	0	0	0	0	0	0	0	0	0	0	0	0	0	0	0	0	0	0	0	0	0	0	0	0
12916	Crem	657.487	103.877	92.615	115.549	37.745	47.434	71.951	1.996	88.39	67.84	0	0	0	77.955	69.257	82.137	60.903	69.162	116.79	57.401	107.663	38.52	117.908	58.23	50.047	44.627	47.883	59.664	70.11	68.222	35.546	7.843	112.513	48.762	58.847	0	0	62.409	121.903	39.624	41.706	43.667	66.088	126.815	119.827
13018	Ctcf	211.646	157.242	176.261	155.236	189.257	174.172	128.596	101.929	177.413	72.019	42.291	21.276	97.207	134.668	161.05	120.798	74.74	91.654	101.014	56.828	21.796	58.832	52.92	67.772	69.43	102.977	80.795	122.805	121.677	154.277	2.809	53.444	101.408	201.508	89.933	293.949	170.182	263.095	259.616	110.21	152.337	150.791	231.218	336.522	266.362
13047	Cux1	13.516	53.882	41.807	0.316	1.595	1.416	0.863	0.7	0.499	0	0	0.045	0.051	0.184	0	0	0.26	0.191	0	0.208	0.249	0	0	0	0.31	0	0	0	0	0.414	0.405	0.874	0.689	1.098	0.656	1.646	1.302	0	0.326	1.254	0	0.221	0	0	0
13048	Cux2	0.197	0.852	0.718	0	0.166	0	0	0	0	0	0	0	0	0	0	0	0	0	0	0	0	0	0	0	0	0	0	0	0	0	0	0	0	0	0	0.273	0	0	0	0	0	0	0	0	0
13134	Dach1	0	0	0	0	0	0	0	0	0	0	0	0	0	0	0	0	0	0	0.374	0	0	0	0	0	0	0	0	0	0	0	0	0	0	0	0	0	0	0	0	0	0	0	0	0	0
13198	Ddit3	0	0	0	0	19.948	23.134	0	0	0	0	0	0	0	12.884	12.443	0	0	0	0	0	0	0	0	0	0	0	0	0	0	0	0	0	0	0	0	0	0	0	0	0	0	0	0	0	0
13345	Twist2	1.453	7.166	3.867	0	0	0	0	0	0	0	0	0	0	0	0	0	0	0	0	0	0	0	0	0	0	0	0	0	0	0	0	0	0	0	0	0	0	0	0	0	0	0	0	0	0
13392	Dlx2	0	10.637	0	0	0	0	0	0	0	0	0	0	0	0	0	0	0	0	0	0	0	0	0	0	0	0	0	0	0	0	0	0	0	0	0	0	0	0	0	0	0	0	0	0	0
13395	Dlx5	0	8.703	0	0	0	0	0	0	0	0	0	0	0	0	0	0	0	0	0	0	0	0	0	0	0	0	0	0	0	0	0	0	0	0	0	0	0	0	0	0	0	0	0	0	0
13418	Dnajc1	0	0	0	0	0	0	0	0	0	1.979	0	1.003	0	0.703	0	7.692	0.996	0	4.57	0	0.169	0	0	0	7.571	0	0	1.823	2.777	14.754	0	8.871	21.298	2.565	13.544	5.885	1.182	1.167	20.573	3.068	1.204	0.949	29.93	31.062	25.547
13496	Arid3a	6.083	21.685	21.538	6.365	7.209	7.078	4.128	6.525	4.278	4.064	8.378	10.546	14.674	3.318	7.102	5.772	4.59	10.08	6.377	4.215	7.2	3.896	4.895	5.705	2.308	2.985	1.966	0.79	4.681	5.478	1.297	1.404	0	0	0	0	0	0	0	0	0	0	0	0	0
13555	E2f1	0	0	0	0.306	0.41	0	0	14.309	0	2.379	1.545	1.489	13.979	1.373	0.89	0	0	0.747	2.01	0.442	0	0.596	0	0	0	0	0	0	0	0	0	3.359	0	0	0	0	0	0	0	0	0	0	0	0	0
13557	E2f3	61.437	76.904	71.117	41.396	80.937	71.062	51.932	85.035	47.833	49.516	86.493	55.657	46.293	70.163	52.869	92.289	58.583	60.663	80.327	69.775	62.78	44.322	49.906	40.164	43.452	19.427	43.422	95.545	112.223	92.073	104.339	99.84	31.127	46.81	78.641	42.338	39.747	43.139	34.469	58.817	19.719	23.132	15.195	16.556	18.828
13559	E2f5	25.851	22.845	40.459	28.376	33.806	74.461	31.408	24.878	76.887	42.066	30.52	30.167	16.161	27.021	23.833	19.281	16.86	20.514	10.287	13.427	12.646	11.001	8.802	7.386	10.022	9.454	8.788	9.528	0	9.923	5.284	6.844	0	0	5.664	0	7.521	7.881	7.432	5.879	6.656	6.297	8.239	8.64	9.686
13560	E4f1	33.105	2.999	2.558	3.629	15.568	17.004	0	0	0	0	0	0	0	0	0	0	0	0	0	0	0	0	0	0	0	0	2.019	0	0	0	0	0	0	0	0	0	27.701	0	0	1.387	1.493	0	0	0	0
13591	Ebf1	0.11	0	0	0	0	0	0	0	0	0	0	0	0	0	0	0	0	0	0	0	0	0	0	3.936	0	0	0	0	0	0	0	0	0	0	0	0	0	0	0	0	0	0	0	0	0
13592	Ebf2	0.102	0	0	0	0	0	0	0	0	0	0	0	0	0	0	0	0	0	0	0	0	0	0	0	0	0	0	0	0	0	0	0	0	0	0	0	0	0	0	0	0	0	0	0	0
13593	Ebf3	0.106	0	0	0	0	0	0	0	0	0	0	0	0	0	0	0	0	0	0	0	0	0	0	0	0	0	0	0	0	0	0	0	0	0	0	0	0	0	0	0	0	0	0	0	0
13653	Egr1	1.166	0	1.712	0.945	0	0	0.307	0	0	0.405	0	0	0	1.043	0.829	0.897	1.068	0	0.615	1.286	1.172	2.543	0.65	0	8.638	7.14	8.959	9.847	11.992	12.456	11.483	0	4.081	9.152	1.296	9.664	11.692	0	1.364	7.264	2.403	2.429	0	0	0
13654	Egr2	0	0	0	0	0	0	0.307	0	0	0.405	0	0	0	1.043	0.829	0.897	1.068	0	0.615	1.286	1.172	2.543	0.65	0	4.591	2.648	4.445	2.309	5.886	7.197	5.973	0	1.546	0	0	0	7.651	0	1.364	0	0	0	0	0	0
13655	Egr3	0	0	0	0	0	0	0.358	0	0	0.473	0	0	0	1.217	0.967	1.046	1.246	0	0.717	1.5	1.367	2.967	0.758	0	5.356	3.089	5.185	2.694	6.867	8.396	6.969	0	1.804	0	0	0	8.926	0	1.592	0	0	0	0	0	0
13661	Ehf	0	0	0	0	0	0	0	0	0	0	0	0	0	0	0	0	0	0	0	0	0	0	0	0	0	0	0	0	0	0	1.027	0	0	0	0	0	0	0	0	0	0	0	0	0	0
13709	Elf1	110.156	103.85	90.105	70.26	29.858	27.419	101.322	126.496	51.023	41.184	66.37	54.968	74.14	34.185	33.425	56.796	20.272	29.383	79.944	35.53	32.75	136.319	23.194	35.084	11.196	11.861	11.531	14.336	13.267	12.258	17.466	69.635	5.354	10.759	13.316	10.571	14.238	18.955	22.016	17.345	6.33	11.634	12.657	12.639	5.979
13710	Elf3	0	0	0	0	0	0	0	0	0	0	0	0	0	0	0	0	0	0	0	0	0	0	0	0	0	0	0	0	0	0	0.705	0	0	0	0	0	0	0	0	0	0	0	0	0	0
13712	Elk1	5.356	3.294	0.59	1.513	0	0	0.85	1.693	0	0	0.841	0.549	1.127	0	34.21	0	0	0	0	0	0	0	0	0	0	0	0	0	0	0	12.607	3.416	0	0	0	0	0	0	0	0	0	0	0	0	0
13713	Elk3	23.169	0	23.342	8.107	10.931	9.656	3.578	2.56	9	9.661	2.105	1.001	2.196	4.867	4.739	4.301	2.582	2.702	5.914	6.586	5.088	9.713	0	8.44	14.135	16.34	15.153	20.332	24.029	24.312	41.243	24.996	3.267	22.317	28.473	7.949	21.465	17.903	24.856	7.734	9.988	8.772	10.062	11.627	4.987
13714	Elk4	3.846	12.746	16.591	0	7.888	12.57	0	12.662	0.881	0	7.785	10.407	11.17	8.238	5.403	0.896	11.319	8.052	0	14.413	35.332	1.155	26.704	14.964	25.405	26.002	21.74	21.362	30.793	34.878	55.503	55.846	35.851	68.379	67.744	36.674	83.712	32.948	49.356	56.405	39.047	34.171	63.068	59.067	62.335
13819	Epas1	0	0	0	0.145	0	0	0	0	0	0	0.269	0	0	0	0	0	1.904	1.307	0	1.03	0.785	0	0	0	0	0	0	0	0	0	1.497	0.872	0.515	0	0	0	0	0	0	261.86	0	0	0	0	0
13864	Nr2f6	21.005	46.303	43.167	9.687	28.231	29.995	10.676	30.872	19	3.036	12.604	7.469	28.986	19.878	11.853	45.17	28.866	32.028	0	1.604	1.642	2.268	9.862	8.119	16.104	12.471	13.36	13.877	20.65	16.123	115.373	80.18	193.096	116.606	75.568	94.512	209.314	182.42	239.356	346.89	234.944	203.178	195.807	245.535	235.272
13865	Nr2f1	92.821	155.578	139.325	48.218	70.073	75.196	40.849	93.328	36.749	14.64	25.528	21.81	51.714	28.669	24.715	25.95	35.615	38.126	20.365	11.636	9.627	28.362	20.689	17.357	33.539	28.626	26.652	37.937	39.587	41.628	55.763	104.353	82.747	109.701	98.371	100.549	153.876	151.959	167.668	130.828	72.985	59.361	63.609	76.505	62.681
13875	Erf	5.227	7.846	8.488	2.009	2.478	1.289	2.446	0	0.289	0	0.773	0	2.098	3.563	1.622	0	2.539	3.22	0	2.872	3.268	0	7.657	0	1.522	9.555	8.178	1.423	1.333	3.095	3.817	26.197	6.423	6.803	9.908	4.617	2.152	4.773	7.407	49.455	9.384	11.532	6.069	4.477	4.019
13876	Erg	50.08	63.405	71.982	49.202	36.147	60.869	26.244	16.445	63.774	31.774	47.204	89.009	47.988	105.679	53.522	65.808	62.336	102.888	108.503	97.852	35.081	42.007	162.712	100.574	121.654	84.45	73.855	98.824	111.956	111.789	156.647	205.382	25.553	92.766	66.206	116.665	39.779	78.915	53.457	53.579	48.799	46.141	27.364	74.76	20.651
13982	Esr1	0	0	0	0	0	0	0	0	0	0	0	0	0	0	0	0	0	0	0	0	0	0	0	0	0	0	0	0	0	0	0	0	0	0	0	0	0	0	0	8.646	0	0	0	0	0
13984	Esx1	0	0	0	0	0	0	0	0	0	0	0	0	0	0	0	0	0	0	0	0	0	0	0	0	0	0	0	0	0	0	0.832	0.491	0	0	0	0	0	0	0	0	0	0	0	0	0
14011	Etv6	105.808	85.333	54.745	4.154	1.874	4.955	0	0	0	0.666	0.491	2.106	0	0	0	0	0	0	1.319	0	0	0	0	0	0	0	0	0	0	0	0	0	2.296	0	0	0	8.354	0.75	1.649	49.421	0.775	0.755	0	0	0
14013	Mecom	0	0	0	0	0	0	0	0	0	0	0.427	0.362	0	0	0	0	0.418	0	0	0.669	0.773	0.517	0	0	0	0	0	0	0	0	0	0	0	0	0	2.086	0	0	0	0	0	0	0	0	0
14025	Bcl11a	10.052	12.193	14.741	9.362	7.728	9.134	6.043	14.977	6.064	0	0	0	0	0	1.355	0	0	0	0	0	0	0.426	0	0	0	0	0	0	0	0	0	0.6	0	0	0	0	0	0	0	0	0	0	0	0	0
14234	Foxc2	0.926	7.839	2.964	0	0	0	0	32.326	0	0	0	0	0	0	0	0	0	0	0	0	0	0	0	0	0	0	0	0	0	0	0	11.321	0	0	0	0	0	0	0	0	0	0	0	0	0
14235	Foxm1	0	0	0	0	0.369	0.457	0	0	0.445	4.52	0	0	0	0	0	0	0	0.322	0	0	0	0	0	0	0	0	0	0	0	0	0	0	0	0	0	0	0	0	0	0	0	0	0	0	0
14236	Foxn2	0	1.601	1.112	0.377	0	4.419	0.036	2.408	0	0	1.916	0.686	1.971	4.974	4.049	0	3.567	3.65	0	0	3.235	0	2.777	2.689	0	0	0	0	0	0	0	0	0	0	0	0	0	0	0	0	2.184	0	2.249	0	0
14238	Foxf2	2.519	5.775	8.109	1.313	4.314	1.212	2.505	3.456	0.742	0	9.899	3.317	4.305	4.732	6.357	21.135	3.63	8.634	1.839	4.36	2.347	4.216	9.791	3.635	16.761	14.976	10.823	7.053	21.77	15.741	19.038	6.65	1.101	13.171	13.296	13.075	1.619	9.788	12.334	0	17.631	3.816	5.971	0	9.609
14241	Foxl1	0	3.226	3.459	0	0	0	0	0	0	0	0	0	0	0	0	0	0	0	0	0	0	0	0	0	0	0	0	0	0	0	0	0	0	0	0	0	0	0	0	0	0	0	0	0	0
14247	Fli1	119.255	100.995	102.033	70.006	54.933	84.473	51.207	194.013	37.944	44.577	63.975	60.379	61.318	76.265	66.142	84.143	62.602	66.119	46.083	127.595	59.979	83.086	99.189	84.294	63.49	58.309	91.881	119.322	84.231	81.598	84.528	105.966	23.989	42.594	13.165	34.36	9.306	1.774	25.67	24.291	15.062	14.423	21.127	27.994	19.683
14284	Fosl2	14.637	0	0	0	0	0	0	0	0	0	0	0	0	0	0	0	0	0	0	0	0	0	0	0	0	0	0	0	0	0	0	0	0	0	0	0	0	0	0	0	0	0	0	0	0
14390	Gabpa	352.361	559.685	499.05	402.32	427.337	448.561	351.966	436.732	235.412	200.351	71.425	184.937	253.677	318.614	286.195	243.853	222.005	246.784	160.248	234.699	214.985	149.284	290.753	268.238	120.016	123.196	127.963	198.369	148.154	177.047	503.381	294.453	163.56	178.806	291.27	288.719	284.872	262.565	287.773	471.491	175.119	154.904	179.832	164.317	151.145
14391	Gabpb1	89.896	204.414	186.282	109.996	177.733	193.146	119.864	119.105	174.506	113.889	122.859	112.21	111.714	457.757	278.583	103.602	309.812	370.809	68.007	615.409	514.812	112.61	548.727	336.747	208.781	263.995	234.995	194.59	293.017	186.494	334.702	99.032	110.978	161.649	141.302	85.035	182.153	81.108	194.158	354.288	154.305	151.386	65.355	124.744	46.596
14460	Gata1	1174	401.571	343.674	503.515	46.732	0	298.149	99.374	0	52.237	23.894	38.327	0	27.484	28.794	40.297	34.085	23.871	37.192	15.679	16.259	71.082	15.052	13.385	0	0	0	0	0	0	35.131	25.165	0	0	0	0	0	0	0	0	0	0	0	0	0
14461	Gata2	6.453	18.853	16.819	0	0	0	0.379	0	0	0	0	0	0	0	0	0	0	0	0	0	0	0	0	0	0	0	0	0	0	0	0	0	0	0	0	0	0	0	0	0	0	0	0	0	0
14462	Gata3	0	0	0.713	0	0	0	0	0	0	0	0	0	0	0	0	0	0	0	0	0	0	0	0	0	0	0	0	0	0	0	0	0	0	0	0	0	0	0	0	0	0	0	0	0	0
14463	Gata4	87.841	176.138	150.859	33.608	55.706	64.245	23.373	42.164	23.53	0	5.623	2.542	18.701	7.269	7.803	29.807	18.106	18.65	20.523	21.658	19.469	31.971	27.038	21.623	78.75	67.898	63.118	105.183	116.621	112.243	148.102	147.475	164.086	167.189	217.016	179.403	193.449	112.253	198.082	352.487	124.807	80.549	0	89.595	157.802
14464	Gata5	0	0	1.242	0	0	0	0	0	0	0	0	0	0	0	0	0	0	0	0	0	0	0	0	0	0	0	0	0	0	0	0	0	0	0	0	0	0	0	0	0	0	0	0	0	0
14465	Gata6	35.182	87.466	74.359	33.144	54.818	57.887	43.472	0	38.438	19.093	13.261	9.14	18.47	20.69	30.453	31.429	28.051	30.233	12.255	25.215	8.951	25.582	40.644	32.829	41.865	37.304	38.329	25.065	26.233	54.601	58.87	30.087	0	39.739	75.424	37.638	35.903	35.997	31.717	40.567	19.313	35.741	21.092	38.816	20.53
14536	Nr6a1	0	0	0	0	0	1.79	0	0	0	0	0	0	0	0	0	0	0	0	0	0	0	0	0	0	0	0	0	0	0	0	0	0	0	0	0	0	0	0	0	0	0	0	0	0	0
14581	Gfi1	1.777	46.238	28.674	12.155	4.482	3.61	11.685	48.909	1.939	2.065	28.218	1.252	4.17	72.02	89.626	2.224	2.719	99.25	1.127	0	0	0	0	0	0	0	0	0	0	0	0	0.574	0	0	0	0	0	0	0	0	0	0	0	0	0
14582	Gfi1b	18.195	91.616	58.361	22.315	27.357	20.926	20.131	88.689	3.341	3.558	48.614	2.157	30.656	131.2	154.411	3.831	6.761	174.86	1.941	0	0.502	0	2.364	0	7.43	11.165	9.537	4.691	0	0	0	0.989	0	0	0	0	0	0	0	0	0	0	0	0	0
14605	Tsc22d3	0	0	0	0	0	0	0	0	0	0	0	0	0	0	0.309	0	0	0	0	0	0	0	0	1.454	0	0	0	0	0	0	0	0	0	0	0	0	0	0	0	0	0	0	0	0	0
14632	Gli1	0	0	0	0	0	0	0.086	0	0	0	0	0	0	0	0	0	0	0	0	0	0	0	0	0	0	0	0	0	0	0	0	0.093	0	0	0	0	0	0	0	0	0	0	0	0	0
14633	Gli2	0	0	0	0	0	0	0.068	0	0	0	0	0	0	0	0	0	0	0	0	0	0	0	0	0	0	0	0	0	0	0	0	0.074	0	0	0	0	0	0	0	0	0	0	0	0	0
14634	Gli3	0.549	0.131	0.131	0	0	0	0.062	0	0	0	0	0	0	0	0	0	0	0	0	0	0	0	0	0	0	0	0	0	0	0	0	4.543	0	0	0	0	0	0	0	0	0	0	0	0	0
14815	Nr3c1	0	0	0	0	1.255	1.545	0.956	5.337	1.5	1.437	23.29	2.473	34.347	1.056	2.048	5.614	1.445	2.539	2.079	2.182	1.634	0.418	1.422	0	1.16	1.524	1.396	4.764	2.456	4.373	2.87	3.454	26.626	36.747	30.383	33.672	36.325	35.839	41.1	43.878	23.127	19.489	24.543	31.194	26.487
14886	Gtf2i	139.599	197.196	194.093	81.722	87.838	109.132	72.41	68.548	78.271	17.795	25.399	32.329	52.706	82.975	87.218	12.47	72.52	67.784	8.006	43.028	82.773	20.627	33.124	76.49	69.037	71.266	27.7	52.861	60.273	57.372	34.596	39.516	14.166	43.793	53.857	63.337	46.516	92.971	48.794	27.826	19.357	11.559	4.597	3.899	12.79
15110	Hand1	1.712	0	0	0	0	0	0	0	0	0	0	0	0	0	0	0	0	0	0	0	0	0	0	0	0	0	0	0	0	0	0	0	0	0	0	0	0	0	0	0	0	0	0	0	0
15111	Hand2	7.277	10.387	9.259	1.202	0	0	0	3.995	0	0	0	0	0	0	0	0	0	0.286	0	0	0	0	0	0	0	0	0	0	0	0	0	0	0	0	0	0	0	0	0	3.745	0	0	0	0	0
15205	Hes1	0	0	0	0	0	0	0	0	0	0	0	0	4.538	0	0	2.457	2.063	1.231	0	8.808	2.336	2.666	34.669	22.247	0	0	0	0	0	0	11.282	65.002	7.751	0	0	0	0	0	0	4.49	0	0	0	0	0
15206	Hes2	0	0	0	0	0	0	0	0	0	0	0	0	2.874	0	0	3.861	1.798	0	0	0	0	0	6.947	6.242	0	0	0	0	0	0	0	8.892	0	0	0	0	0	0	0	0	0	0	0	0	0
15209	Hesx1	0	3.038	2.304	1.162	9.418	5.264	3.32	1.074	5.12	0	0	7.11	0.578	2.985	2.628	0	0	0	0	0	0	0	0	0	0	0	0	0	0	0	0	0	0	0	0	0	0	0	0	0	0	0	0	0	0
15218	Foxn1	0	1.5	0	0	0	2.883	0.034	0	0	0	0	0	0	3.767	3.209	0	2.854	3.418	0	0	3.03	0	2.601	2.242	0	0	0	0	0	0	0	0	0	0	0	0	0	0	0	0	2.046	0	2.107	0	0
15223	Foxj1	0	1.957	0	0	0	3.763	0.044	0	0	0	0	0	0	4.915	4.187	0	3.724	4.461	0	0	3.953	0	3.394	2.926	0	0	0	0	0	0	0	0	0	0	0	0	0	0	0	0	2.669	0	2.749	0	0
15227	Foxf1	3.527	8.085	11.352	4.233	6.04	7.859	3.506	13.721	1.038	0	14.659	11.777	16.695	11.15	9.509	36.909	5.082	16.661	2.575	13.171	3.286	5.902	13.707	9.917	23.466	26.377	21.222	9.874	31.889	28.249	26.654	24.879	5.948	26.691	18.615	18.305	2.266	13.703	23.976	0	28.8	5.342	8.36	0	13.453
15228	Foxg1	0	4.665	3.113	0	0	3.387	0.039	0	0	0	0	0	0	4.424	3.768	0	3.351	4.015	0	0	3.558	0	3.055	2.633	0	0	0	0	0	0	0	0	0	0	0	0	0	0	0	0	2.402	0	2.474	0	0
15242	Hhex	0	0	0	0	0	2.945	0	0	0	0	0	1.632	0	0	0	0	0	3.355	0	7.945	51.378	19.599	6.215	45.329	15.524	15.524	15.393	18.779	32.552	19.663	42.047	15.164	264.806	127.923	22.352	139.835	156.938	54.291	157.93	70.395	212.584	228.724	270.79	320.243	353.04
15248	Hic1	0.908	1.348	0.392	0	0	0.22	0	0	0	0	0	0.226	0	0	0	0	0	0	0	0	0	0.273	0	0	0.715	0	0.337	1.09	1.22	1.346	5.836	1.635	1.167	15.015	22.358	17.998	8.283	9.997	7.32	2.18	1.064	0	0.864	0	0.44
15251	Hif1a	0.316	3.547	1.674	1.916	5.018	5.368	0.551	3.061	0.937	0	2.657	3.727	0	3.374	1.103	0	1.986	1.003	0	2.469	0.242	0	0	0	0	0	2.408	0	8.294	6.59	1.035	1.139	0	0	0	0	0	0	0	0	0	0	0	0	0
15273	Hivep2	0	0	0	0	0	0	0	0	0	0	0	0	0	0	0	0.318	0	0	0	0	0	0	0	0	0.27	0	0	0	0	0	0	0	0	0	0	0	0	0	0	0	1.485	1.482	0	0	0
15289	Hmgb1	930.68	1114.69	934.815	1473.38	1736.64	1993.68	2206.06	1742.94	3304.68	3333.71	1963.12	2423.53	2562.43	2949.61	2742.12	2895.24	3134.42	3475.57	2417.47	2851.2	3052.08	3104.81	2753.18	2706.65	2685.13	2576.66	2640.79	2649.21	2574.54	2623.96	2588.94	1981.38	1836.91	1633.01	2202.89	2006.88	2955.65	2530.83	2594.64	1546.18	1878.98	1929.29	2653.46	2280.86	2840.05
15353	Hmg20b	8.24	37.097	33.975	17.026	38.629	52.61	16.915	23.163	33.397	6.254	4.466	88.223	16.068	8.769	14.391	21.984	9.982	17.578	19.001	33.233	32.565	15.342	29.335	15.766	44.745	39.584	34.381	45.41	50.097	63.816	79.708	49.876	7.87	12.428	24.354	36.001	34.525	49.494	44.37	21.572	19.632	15.448	5.781	28.966	21.575
15354	Hmgb3	7431.66	12248.8	12975	11481.8	13824.6	10759.5	14773.9	12319.7	17963.9	13058.1	14700	14294.6	10955.7	12070.1	15406.3	11770.8	13477.6	15616	7434.35	8765.84	6925.74	5219.73	4603.36	7692.86	3968.95	5415.59	5181.46	2402.64	2397.43	2781.43	2506.35	3836.33	1460.44	1680.76	1837.42	2195.82	2046.58	2079.15	1770.23	1438.64	1242.36	1314.96	1156.89	1496.93	1411.9
15361	Hmga1	16728.4	18796	20799.7	19624.5	20083.4	18048.9	15265.6	18620.5	11117.7	13889.7	15253.9	10997.3	9272.58	11065.7	10257.5	13377.3	15786	12832.2	25457.6	19060.9	22585	21679.1	22959.9	20429	13953.5	17799.8	18986.2	15394.4	19977.6	16309.9	16836.9	19203	7463.68	8778.68	10375.5	9070.21	11083.6	10808.5	10759.1	9519.99	11945.4	9410.18	9096.5	9190.31	13914.5
15364	Hmga2	18807.4	7825	8455.54	5665.05	1606.62	2467.45	4304.18	2474.65	911.204	1693.84	1683.28	1327.36	877.645	1078.32	805.121	2073.45	964.666	1185.13	5877.67	1674.74	1671.66	5171.1	3024.95	1162.61	913.914	1209.39	1152.22	1183.26	1160.15	1188.01	2340.27	1233.72	220.821	646.42	677.124	637.36	540.965	498.518	473.939	636.861	272.626	256.765	235.72	216.698	252.856
15375	Foxa1	1.697	0	4.094	0	8.45	10.329	7.122	10.566	9.277	6.815	9.567	13.387	20.614	8.171	2.025	20.801	9.856	11.458	7.355	7.323	6.864	0.339	0	6.368	5.678	5.325	4.258	1.502	7.282	6.562	4.057	15.795	48.544	2.87	21.219	5.371	34.373	48.11	30.099	37.09	56.64	34.484	79.602	89.621	109.651
15376	Foxa2	0	0	0	0	0	0	0	0	0	0	0	0	0	0	0	0	0	0	0	0	0	0	0	0	0	0	0	0	0	0	0	0	0	1.524	0	0	0	0	0	0	2.358	0	0	0	0
15377	Foxa3	0	0	0	0	0	0	0	0	0	0	0	0	0	0	0	0	0	0	0	0	0	0	0	0	0	0	0	0	0	0	0	0	0	0	0	0	0	0	0	0	3.654	0	0	0	0
15378	Hnf4a	351.088	296.498	256.267	491.878	193.102	305.546	275.952	355.699	292.374	142.509	300.041	192.325	653.243	428.846	373.239	246.658	337.812	460.983	183.745	315.507	316.899	308.901	329.81	278.33	379.76	249.904	234.626	198.34	402.757	243.02	1664.51	991.051	4292.56	1010.83	944.219	909.969	2797.79	2930.33	2809.74	3511.91	3286.94	3009.69	2372.23	2756.99	2030.18
15379	Onecut1	13.743	6.413	10.405	3.654	4.606	4.921	1.383	8.646	3.349	0	16.024	18.75	14.182	4.431	1.754	17.794	20.561	15.135	115.511	91.352	42.424	30.644	60.41	28.879	14.997	12.821	20.764	17.995	39.891	84.922	83.197	70.519	124.088	36.107	39.664	41.421	107.309	104.618	106.383	267.995	98.051	100.014	100.469	104.044	95.405
15401	Hoxa4	4.043	1.405	1.105	1.182	0	0	0	0.731	0	0	0.599	0.302	0.464	0	0	0	0	0	0	0	0	0	0	0	0	0	0	0	0	0	0	1.047	0	0	0	0	0	0	0	0	0	0	0	0	0
15402	Hoxa5	65.304	38.79	37.098	1.3	0.784	9.914	0.117	2.513	2.128	0	1.079	0.37	0	0	0	0	0	0	0.393	2.87	0	3.77	1.717	0	25.542	3.845	2.056	3.414	3.443	3.919	1.937	1.893	0	0	6.363	4.081	2.884	0.561	0.451	0	0	0	0.431	0	0.221
15403	Hoxa6	1.277	0	0	0	0	0	0.117	0.375	0	0	0	0.37	0	0	0	0	0	0	0.393	0	0	0.117	0	0	0	0.588	0	0	0	0	0	0.726	0	0	0.759	0	0	0.561	0.451	0	0	0	0.431	0	0.221
15404	Hoxa7	2.074	0	0	0	0	0	0.19	0.609	0	0	0	0.602	0	0	0	0	0	0	0.639	0	0	0.191	0	0	0	0.956	0	0	0	0	0	1.179	0	0	1.233	0	0	0.912	0.734	0	0	0	0.701	0	0.359
15405	Hoxa9	0	0	0	0	0	0	0	0	0	0	0	0	0	0	0	0	0	0	0	0	0	0	20.543	0	0	0	0	0	0	0	0	0	0	0	0	0	0	0	0	0	0	0	0	0	0
15412	Hoxb4	24.905	17.54	10.165	0	116.62	126.725	0.506	2.362	0	0	0	0	0	0	0	0	0	0	0	0	0	0	0	0	0	0	0	0	54.965	0	0	3.773	0	0	0	0	0	0	0	0	0	0	0	0	0
15413	Hoxb5	1.383	0	0	0	0	0	0.127	0.406	0	0	0	0.401	0	0	0	0	0	0	0.426	0	0	0.127	0	0	0	0.637	0	0	0	0	0	0.786	0	0	0.822	0	0	0.608	0.489	0	0	0	0.467	0	0.239
15414	Hoxb6	1.383	0	0	0	0	0	0.127	0.406	0	0	0	0.401	0	0	0	0	0	0	0.426	0	0	0.127	0	0	0	0.637	0	0	0	0	0	0.786	0	0	0.822	0	0	0.608	0.489	0	0	0	0.467	0	0.239
15415	Hoxb7	2.074	0	0	0	0	0	0.19	0.609	0	0	0	0.602	0	0	0	0	0	0	0.639	0	0	0.191	0	0	0	0.956	0	0	0	0	0	1.179	0	0	1.233	0	0	0.912	0.734	0	0	0	0.701	0	0.359
15416	Hoxb8	1.509	0	0	0	0	0	0.138	0.443	0	0	0	0.438	0	0	0	0	0	0	0.465	0	0	0.139	0	0	0	0.695	0	0	0	0	0	0.857	0	0	0.897	0	0	0.663	0.534	0	0	0	0.509	0	0.261
15417	Hoxb9	1.106	0	0	0	0	0	0.101	0.325	0	0	0	0.321	0	0	0	0	0	0	0.341	0	0	0.102	0	0	0	0.51	0	0	0	0	0	0.629	0	0	0.657	0	0	0.486	0.391	0	0	0	0.374	0	0.191
15423	Hoxc4	0	1.661	1.306	0	0	0	0	0	0	0	0	0	0	0	0	0	0	0	0	0	0	0	0	0	0	0	0	0	0	0	0	0	0	0	0	0	0	0	0	0	0	0	0	0	0
15424	Hoxc5	6.673	0	0	0	0	0	0.169	0.541	0	0	0	0.535	0	0	0	0	0	0	0.568	0	0	0.169	0	0	0	0.85	0	0	0	0	0	1.048	0	0	1.096	0	0	0.81	0.652	0	0	0	0.623	0	0.319
15425	Hoxc6	1.277	0	0	0	0	0	0.117	0.375	0	0	0	0.37	0	0	0	0	0	0	0.393	0	0	0.117	0	0	0	0.588	0	0	0	0	0	0.726	0	0	0.759	0	0	0.561	0.451	0	0	0	0.431	0	0.221
15426	Hoxc8	1.509	0	0	0	0	0	0.138	0.443	0	0	0	0.438	0	0	0	0	0	0	0.465	0	0	0.139	0	0	0	0.695	0	0	0	0	0	0.857	0	0	0.897	0	0	0.663	0.534	0	0	0	0.509	0	0.261
15427	Hoxc9	1.277	0	0	0	0	0	0.117	0.375	0	0	0	0.37	0	0	0	0	0	0	0.393	0	0	0.117	0	0	0	0.588	0	0	0	0	0	0.726	0	0	0.759	0	0	0.561	0.451	0	0	0	0.431	0	0.221
15436	Hoxd4	0	1.405	1.105	0	0	0	0	0	0	0	0	0	0	0	0	0	0	0	0	0	0	0	0	0	0	0	0	0	0	0	0	0	0	0	0	0	0	0	0	0	0	0	0	0	0
15438	Hoxd9	1.277	0	0	0	0	0	0.117	0.375	0	0	0	0.37	0	0	0	0	0	0	0.393	0	0	0.117	0	0	0	0.588	0	0	0	0	0	0.726	0	0	0.759	0	0	0.561	0.451	0	0	0	0.431	0	0.221
15499	Hsf1	0	0	0	0	1.419	28.735	0	0	0	0	0	0	0	0	0.6	0	0	0	0	3.115	0.299	0	0	0	0	0	0	0	0	0	0	0	3.468	0	0	0	2.08	2.539	0	13.62	0	3.613	3.718	11.46	13.729
15500	Hsf2	0	0	0	0	1.093	0.348	0	0	0	0	0	0	0	0	0	0	0	0	0	0.891	1.448	0	0	0	0	0	0	0	0	0	1.917	0	0	0	0	0	0	0	2.326	9.859	0	2.646	0	0	0
15900	Irf8	0	0	0	0	0	3.194	0	0	0	0	0	0	0	0.919	0	0	0	0	0	0	0	0	0	0	400.257	4.552	0.439	0	4.177	0	0	0	0	8.476	0	0	0	0	0	0	0	0	0	0	0
16362	Irf1	1.886	0	0.708	22.308	0	0	0	2.627	0	0	0	1.712	0	0	0	0	0	0	0	0.936	0	0.896	0	0	0	0	0	0	0	1.429	9.957	4.849	0	1.445	0	0	0	0	0	15.778	0	0	0	0	0
16363	Irf2	561.594	308.799	324.026	107.822	188.622	164.691	174.294	191.573	279.654	71.075	179.234	117.184	157.775	239.483	216.423	118.996	178.984	239.051	211.956	150.574	106.299	125.781	107.136	77.212	87.486	48.286	60.886	104.361	69.836	172.575	218.931	50.329	64.476	117.585	163.738	150.501	108.916	136.15	190.121	317.909	117.343	99.118	227.601	220.698	156.941
16391	Irf9	0	3.132	1.037	0.651	1.928	1.674	2.137	0	2.537	0.554	2.742	2.357	1.704	0.961	1.05	0	2.071	2.206	0	0	2.634	0.548	2.178	2.368	1.958	1.469	1.602	0	0	2.459	1.69	1.241	2.639	2.817	2.435	2.913	3.5	5.207	4.008	17.962	3.83	0	0	3.73	3.172
16392	Isl1	0	11.137	0	0	0	0	0	0	0	0	0	0	0	0	0	0	0	0	0	0	0	0	0	0	0	0	0	0	0	0	0	0	0	0	0	0	0	0	0	0	0	0	0	0	0
16468	Jarid2	0.04	0	0	0	0	0	0	0	0.972	0	0	0.04	0	1.152	0.816	0	0	0.136	0	0	0.84	0	0	0	0	0	0	0	0	0	0	0.181	0	0	0	0	0	0	0	0	0	0	0	0	0
16476	Jun	4.25	5.222	2.26	0	0	0	0	0	0	0	0	0	0	0	0	0	0	0	0	0	0	0	0	0	0	0	0	0	0	0	0	0	0	0	0	0	0	0	0	2.747	0	0	0	0	0
16477	Junb	10.246	0	0	4.154	0	0	0.236	0	0	0	0	0	0	0	0	0	0	0	0	0	0	0	0	0	0	0	0	0	0	0	0	0	0	0	0	0	0	0	0	4.005	0	0	0	0	0
16478	Jund	21.252	9.614	6.153	9.818	0.359	0	7.542	12.74	0	5.875	8.007	5.484	0	0	0	0	0	0	5.747	0	0	0	0	0	0	0	0	0	0	0	4.712	8.935	0	0	0	0	1.176	0	0	10.455	0	0	0	0	0
16549	Khsrp	0	1.709	0.401	0.149	26.889	23.141	0	24.261	10.197	0.607	10.399	0	6.432	2.585	4.952	8.448	35.992	33.616	0	1.112	1.503	5.093	2.733	1.631	6.141	5.667	3.727	9.408	10.311	9.747	9.874	35.521	38.834	42.788	35.949	30.523	27.727	27.455	49.86	58.35	76.96	64.829	42.36	43.054	43.571
16596	Klf1	4.458	10.098	11.106	6.052	0	0	2.526	2.533	0	0	0	0	0.662	0	1.999	1.097	0	0	0	0	0.782	3.898	0.993	0.836	1.503	0	1.388	1.101	0	0	0	1.183	0	0	0	0	0	0	0	0	0	0	0	0	0
16597	Klf12	4.758	31.96	26.887	0.36	17.6	41.923	0.209	0.266	50.116	0.911	0	0	0	47.542	40.638	21.307	12.353	18.7	1.233	25.453	24.812	1.024	43.028	37.505	43.101	39.858	37.23	53.757	56.439	58.207	21.559	3.14	49.101	71.011	72.933	73.956	61.741	64.88	58.118	17.873	20.315	3.012	32.706	20.771	31.345
16598	Klf2	4.458	0	1.953	5.268	0	0	2.526	2.533	0	0	0	0	0.662	0	1.999	1.097	0	0	0	0	0.782	3.898	0.993	0.836	1.503	0	1.388	1.101	0	0	0	1.183	0	0	0	0	0	0	0	0	0	0	0	0	0
16599	Klf3	6.441	37.911	33.305	9.632	29.796	91.383	27.981	91.748	69.134	29.684	35.994	14.825	86.529	47.542	40.638	64.21	26.319	24.41	38.46	25.453	24.812	1.024	43.028	49.299	49.202	39.858	59.378	53.757	56.439	66.645	21.559	0.372	45.679	95.807	80.199	56.106	80.905	75.349	93.304	9.382	27.934	13.253	36.112	23.834	78.345
16600	Klf4	3.285	0	1.439	3.881	0	0	1.861	1.867	0	0	0	0	0.488	0	1.473	0.809	0	0	0	0	0.576	2.872	0.731	0.616	1.107	0	1.022	0.811	0	0	0	0.872	0	0	0	0	0	0	0	0	0	0	0	0	0
16601	Klf9	0	0	0	0	0	0	0	0	0	0	0	0	0	0	0	0	0	0	0	0	0	0	0	0	0	0	0	0	0	0	0	0	0	0	0	0	11.269	19.018	2.903	0	8.179	4.806	0	0	5.232
16656	Hivep3	0	0	0	0	0	0	0	0	0	0	0	0	0	0	0	0.318	0	0	0	0	0	0	0	0	0.27	0	0	0	0	0	0	0	0	0	0	0	0	0	0	0	1.485	1.257	0	0	0
16658	Mafb	6.345	0	0	0	0	0	6.076	0	0	0	0	0	0	0	0	0	0	0	0	0	0	0	0	0	0	0	0	0	3.632	0	18.333	0	5.332	0	0	0	6.196	0	0	31.4	0	9.59	0	0	0
16764	Aff3	0	0	0	0	0	0	0	0	0	0	0	0	0	0.138	0	0	0	0	0	0	0	0	0	0	0	0	0	0	0	0	0	0	0	0	0	0	0	0	0	0	0	0	0	0	0
16842	Lef1	8.973	11.898	10.865	5.895	7.356	8.263	5.495	12.762	7.783	5.765	9.567	8.492	9.443	18.829	17.14	20.661	8.718	10.232	20.52	75.487	59.926	6.988	79.512	71.293	14.427	9.522	8.561	14.634	20.15	15.769	22.889	13.565	0	0	11.825	11.669	13.081	11.052	10.388	15.992	35.175	16.396	8.815	9.333	9.175
16870	Lhx2	11.349	15.578	7.292	4.815	0	0	0.793	0	0	0	0	0	0	0	2.053	0	0	0	0	4.246	0.565	1.157	1.892	5.266	0	5.683	0	9.496	0	2.232	4.698	2.58	0	1.002	26.506	1.369	0.966	19.422	0	0	0	0	0	0	0
16876	Lhx9	5.187	4.032	3.956	1.152	0	0	0.799	0	0	0	0	0	0	0	0	0	0	0	0	0	0.569	1.165	1.907	0.567	0	0	0	1.95	0	2.248	0	2.599	0	1.009	1.326	1.379	0.973	1.452	0	0	0	0	0	0	0
16969	Zbtb7a	8.924	16.125	9.579	12.61	35.023	54.031	55.318	37.582	14.566	22.847	6.64	15.448	27.128	0	0	14.425	0	0	4.335	0	0	10.924	0	0	2.984	2.855	2.808	0	0	0	0	1.38	7.082	7.428	4.062	3.844	7.156	4.171	11.668	0	4.968	6.756	0	2.838	2.625
16978	Lrrfip1	0	0	0	0	0	1.117	1.097	2.349	1.137	0.34	1.233	0.592	0	1.897	0.354	1.188	1.839	2.19	1.787	2.472	1.789	0.207	1.232	0.298	1.699	0.379	2.044	0.319	2.383	2.576	0	3.126	7.832	3.56	4.53	4.01	6.203	5.37	6.78	16.185	6.788	6.11	5.385	7.154	7.662
17002	Ltf	0	0	0	0	0.461	0	0	0	0.251	2.154	4.464	3.152	2.403	14.536	76.985	20.7	86.192	83.517	54.861	237.304	232.464	2.965	54.34	84.592	18.932	15.294	12.777	96.803	12.964	25.867	33.113	3.844	0	0	0	0	0	0	0	0	0	0	0	0	0
17089	Lyar	4.518	52.338	49.547	10.391	46.572	42.681	7.821	25.051	73.207	60.238	22.031	34.259	16.013	241.058	135.197	54.756	35.99	120.222	55.323	223.292	216.339	0.52	195.761	171.953	147.861	141.271	148.68	240.45	131.711	157.478	4.26	11.656	97.196	138.704	47.578	124.561	42.655	58.218	67.559	6.043	129.916	13.162	97.03	172.76	175.352
17095	Lyl1	17.399	15.969	76.267	12.665	64.184	89.978	10.501	5.603	140.231	14.828	3.012	3.672	8.457	13.076	11.145	0	91.003	0	0	0.718	0	0	0	0	0	0	0	0	0	0	0	1.132	0	0	0	0	0	0	0	0	0	0	0	0	0
17119	Mxd1	41.533	44.88	47.478	83.789	0	2.337	57.705	65.999	14.62	20.188	85.38	85.208	43.596	22.57	18.404	22.003	15.354	19.491	22.561	0	19.778	23.08	20.29	0	0	2.729	4.176	0	2.634	0	31.972	21.277	0	0	0	0	0	0	0	0	0	0	0	0	0
17121	Mxd3	3.693	0	0	4.318	0	0	5.117	6.595	0	3.87	6.465	3.145	2.86	1.051	7.654	1.889	0.966	1.303	0	1.302	0	0	0	0	0	0	0	0	0	0	2.731	0	0	0	0	0	0	0	0	0	0	0	0	0	0
17122	Mxd4	14.439	0	3.877	13.307	0	3.607	2.184	2.908	0	0	0	0	0	4.233	0	0	4.424	8.356	0	9.53	15.221	19.175	33.802	11.149	15.034	9.813	0	18.607	0	18.757	3.248	25.627	9.612	6.43	53.714	6.671	19.686	3.755	18.995	49.316	19.427	29.089	16.433	0	15.538
17125	Smad1	0	0.485	0.511	0	0.732	0	0	0.577	17.166	1.62	9.107	0.026	10.192	0	2.258	1.505	8.236	1.249	5.988	9.272	1.292	0.881	1.259	1.356	1.767	2.049	1.22	30.665	2.549	3.071	0	0	0	2.234	27.875	34.104	1.923	2.714	2.571	2.202	31.803	4.3	41.965	2.422	46.907
17126	Smad2	0	1.134	0.974	0.389	1.062	1.042	0.399	0	0.875	0.704	0	0	0	0.975	0.814	0.795	1.097	1.278	0	0.266	1.119	0.437	0	1.057	1.572	1.334	1.247	1.592	1.755	1.719	1.04	0	0	2.079	2.524	2.5	2.249	2.004	2.29	1.91	0	1.928	2.028	0	0
17127	Smad3	0.677	2.132	1.75	0.389	1.062	2.123	2.357	0	2.242	2.876	0.263	0	0.727	0.975	0.814	4.098	1.097	3.905	1.035	4.095	1.816	1.087	0	1.057	3.24	2.942	4.357	1.592	1.755	4.53	1.04	1.743	2.39	3.877	5.009	5.987	3.207	2.004	4.877	1.91	1.365	3.963	4.521	4.733	1.859
17128	Smad4	1.248	0	2.326	0	1.2	0	1.048	0	0	0	0	0	0	0	0	0	9.11	8.839	0	18.421	15.339	1.874	10.538	0	0	11.134	10.59	0	0	20.876	7.926	2.008	0	17.538	4.251	0	19.789	18.605	0	27.31	26.611	6.234	0	26.644	26.748
17129	Smad5	0	0.485	0.511	0	0.732	0	0	0.577	17.166	2.89	9.107	0.026	10.192	0	2.258	3.256	8.236	1.249	7.402	11.737	3.776	0.881	1.259	3.406	1.767	2.049	1.22	30.665	2.549	3.071	0	0	0	6.67	27.875	38.914	6.625	2.714	2.571	2.202	31.803	4.3	44.669	5.433	46.907
17132	Maf	1.26	0	0	0	0	0	1.023	0	0	0.877	0	0	0	0	0	0	1.437	0	2.614	4.03	0	0	0	0	0	4.848	5.111	9.643	8.742	9.138	4.716	5.889	5.596	7.154	6.689	11.6	5.961	10.227	7.041	14.724	5.885	6.237	0	0	0
17133	Maff	73.603	105.161	92.491	52.136	24.11	27.683	46.756	142.96	24.854	30.543	35.557	85.619	17.143	48.217	34.587	100.223	79.325	77.217	104.658	64.208	70.442	28.138	35.998	27.913	36.353	30.794	29.746	37.131	33.474	39.576	23.736	27.005	43.482	40.342	44.418	41.436	58.564	57.122	62.703	28.948	40.073	39.191	47.073	50.102	46.177
17134	Mafg	302.033	170.121	174.368	137.724	52.145	84.862	125.819	160.642	35.699	64.214	125.798	96.56	86.54	108.127	127.806	78.741	81.695	119.256	86.157	278.089	247.356	131.544	199.6	168.011	232.206	217.926	210.991	282.49	305.531	294.717	192.109	146.481	383.408	463.181	426.337	418.97	512.916	401.176	446.232	243.868	342.886	341.816	275.332	359.983	314.677
17135	Mafk	434.017	212.324	191.459	283.976	78.876	84.677	81.87	147.294	67.972	92.325	59.565	115.523	36.975	60.361	50.751	72.384	55.296	58.16	81.021	124.858	102.612	68.736	75.647	68.057	102.926	97.044	74.865	77.867	81.436	90.688	25.867	44.82	83.364	82.177	88.017	41.555	117.626	116.172	114.784	68.862	75.935	128.573	87.248	87.906	80.831
17187	Max	881.705	1375.69	1226.51	1039.81	1112.59	1336.66	876.614	455.381	979.136	621.08	354.473	395.853	392.793	963.498	898.54	805.458	591.041	762.24	646.976	787.447	795.659	498.341	579.802	619.524	915.016	710.986	714.27	845.588	936.499	935.862	1065.42	735.681	706.834	716.085	728.74	661.54	833.96	666.66	775.419	296.105	545.509	609.378	530	655.733	624.678
17188	Maz	73.762	272.732	166.673	51.631	154.548	258.755	62.736	39.217	116.543	54.355	15.115	20.351	46.796	181.509	174.826	74.353	74.77	105.424	70.265	50.735	38.788	16.023	74.005	66.259	106.045	50.056	65.575	50.904	49.141	105.315	85.165	88.561	73.997	77.485	99.685	90.246	90.149	79.054	99.441	45.08	123.868	68.389	42.688	48.67	44.813
17190	Mbd1	26.828	22.035	17.521	12.846	7.65	9.92	6.872	40.271	0.933	1.213	0.851	1.042	0	2.136	0	3.7	2.469	0	4.056	7.12	7.23	6.612	4.78	4.211	19.772	9.437	12.77	22.122	26.058	16.62	12.562	4.075	30.452	74.847	63.167	40.807	59.107	52.032	38.16	65.41	50.365	51.857	14.192	3.949	17.899
17191	Mbd2	5.621	17.949	19.688	2.33	8.791	16.645	5.363	13.82	12.082	27.339	25.78	31.058	29.362	23.262	24.612	24.29	22.717	24.682	56.509	15.909	12.693	22.718	9.257	11.292	19.803	0	8.953	15.372	14.33	4.951	10.336	44.614	3.705	17.355	27.394	18.956	21.937	32.208	20.165	105.077	25.976	32.966	1.042	14.406	11.035
17192	Mbd3	5.068	205.98	29.418	2.006	142.146	2.367	0	2.877	0	0	0	0	0	0	0	0	0	0	0	0	0	0	0	0	0	1.937	0	1.97	0	0	0.997	2.938	2.93	6.219	5.934	4.516	8.269	9.695	7.94	5.913	0	0	0	0	0
17193	Mbd4	5.934	0	0.364	0	0	0	0.821	0.676	0	0	0	0	0	0	0	0	0	0	0	0	0	0	0	0	0	0	0	0	0	0	0	0.381	0	0	0	0	0	0	0	0	0	0	0	0	0
17257	Mecp2	318.526	346.457	349.32	138.57	192.699	204.278	159.305	189.964	137.249	124.558	168	108.181	98.255	263.888	139.5	243.675	208.453	242.91	350.351	475.825	385.23	422.553	695.554	659.252	930.391	794.036	627.46	993.005	1247.08	1077.17	1128.45	866.377	1274.01	1965.48	2259.96	2208.02	2009.18	2353.2	2069.67	3102.12	1778.67	1614.95	1839.36	2146.19	1853.82
17258	Mef2a	4.875	8.681	5.703	11.096	24.215	19.047	12.932	13.258	22.308	17.911	18.787	18.419	13.505	28.858	26.17	26.039	31.799	29.807	22.417	25.115	32.503	16.795	26.083	35.345	29.931	33.761	35.093	48.871	39.241	40.815	27.556	20.627	44.985	30.008	41.864	31.196	28.832	34.385	28.012	35.7	31.082	43.672	36.919	23.956	42.73
17260	Mef2c	4.96	8.923	5.861	17.038	17.385	12.448	13.207	64.572	17.213	26.627	61.335	18.724	13.731	29.435	26.696	109.103	124.25	30.413	22.846	221.782	232.97	17.106	26.808	35.993	213.156	196.409	28.258	38.799	39.889	41.509	72.709	15.999	35.323	30.525	63.981	35.064	49.331	48.539	73.778	87.62	24.953	37.629	37.6	67.589	36.878
17261	Mef2d	4.086	18.137	13.804	18.052	34.057	32.847	17.341	11.484	12.555	11.347	10.809	28.531	22.847	36.054	35.413	32.317	35.901	39.769	27.395	42.938	39.006	18.981	47.552	40.807	45.373	43.465	13.996	53.766	48.011	22.578	12.032	43.604	59.246	25.883	42.241	47.61	38.427	43.696	39.687	30.708	41.901	55.326	59.966	61.365	58.089
17268	Meis1	58.122	62.348	40.84	17.177	27.635	23.606	11.307	7.726	5.897	2.472	1.865	2.876	3.592	4.994	9.547	1.033	5.439	5.632	0	4.425	0.805	2.73	0	0.65	0	0	0	0	0	0	2.376	3.433	0	2.855	0	4.131	0	0	0.127	0	0	0	0	0	0
17285	Meox1	0	8.606	10.615	0	0	0	0	0	0	0	2.026	1.241	0	0	0	0	0	0	0	0	16.61	0.723	0	5.561	25.282	13.261	13.549	0	27.118	16.44	0	0.442	0	0	0	0	0	0	0	0	0	0	0	0	0
17286	Meox2	0	8.606	10.615	0	0	0	0	0	0	0	2.026	1.241	0	0	0	0	0	0	0	5.502	16.61	0.723	0	5.561	25.282	13.261	13.549	0	27.118	16.44	1.74	0.442	0	0	0	0	0	0	0	0	0	0	0	0	0
17300	Foxc1	0	2.903	3.113	0	0	0	0	0	0	0	0	0	0	0	0	0	0	0	0	0	0	0	0	0	0	0	0	0	0	0	0	0	0	0	0	0	0	0	0	0	0	0	0	0	0
17341	Bhlha15	0	0	0	0	0	0	0	0.743	0	0	0	0	0	0	0	2.826	1.659	2.047	9.948	3.316	2.654	0	0	0	0	0	0	0	0	0	0	0	0	0	0	0	0	0	0	0	0	3.685	7.312	0	7.328
17342	Mitf	11.816	23.154	12.436	7.952	6.211	8.483	3.653	5.023	2.402	0	4.498	2.158	0	4.663	6.605	2.2	3.034	5.901	1.529	2.427	2.711	25.684	7.843	3.61	13.269	14.689	15.079	15.87	25.01	16.582	33.358	6.582	18.477	31.247	24.866	22.663	25.29	17.697	26.302	37.975	14.709	20.014	23.548	19.662	24.556
17344	Pias2	0.269	0.936	0.831	0.097	1.066	1.214	0.41	1.031	0.532	0	0.939	0.268	2.467	0	0.714	0	0.766	0.743	0	0	0.542	0	0	0	0	0.928	0.902	1.379	2.052	1.519	1.147	1.339	1.298	0	2.262	0	2.811	0	2.779	0.96	2.738	2.512	0	0	0
17425	Foxk1	23.537	30.1	21.632	25.569	88.485	65.093	40.175	17.18	41.511	35.973	37.783	26.193	37.07	75.629	77.109	65.169	76.542	73.278	43.778	82.507	64.166	13.953	83.233	100.457	64.348	52.323	83.238	101.109	89.69	134.217	56.038	206.809	151.707	90.603	123.252	116.54	190.687	194.657	120.805	107.637	128.117	151.548	69.081	70.446	101.923
17428	Mnt	21.102	109.051	88.186	65.78	96.086	87.115	69.25	95.695	32.573	81.182	51.433	71.803	91.581	35.13	40.365	87.473	13.564	19.165	55.544	31.087	29.584	32.923	57.734	26.916	37.799	8.763	52.465	76.069	43.727	51.899	78.359	122.855	22.01	4.074	20.352	26.123	46.445	24.938	44.743	75.455	53.896	34.105	61.921	10.212	23.89
17536	Meis2	33.502	15.974	25.077	5.061	8.121	10.524	5.382	0.216	1.522	0	0	0	0.226	0.691	1.149	1.19	1.343	1.625	0	0.609	0.927	0.358	0	0.748	0	1.361	1.224	1.746	1.577	0	2.737	3.295	0	2.556	0	0	2.904	2.601	3.311	1.203	1.027	0	0	0	0
17537	Meis3	8.688	2.661	6.823	2.08	2.818	4.195	2.338	0.214	0	0	0	0	0.224	0.684	0	0	0.704	0.663	0	0.603	0	0	0	0	0	0	0	0	0	0	0.277	0	0	0	0	0	0	0	0.145	0	0	0	0	0	0
17681	Msc	0	0	0	0	0	0	0	0	0	0	0	0	0	0	0	0	0	0	0	0	0	0	0	0	0	0	0	0	0	0	0	1.486	0	0	0	0	0	0	0	0	0	0	0	0	0
17859	Mxi1	21.877	19.479	11.325	3.492	24.707	7.454	8.391	34.324	26.344	12.131	32.976	39.586	43.423	33.512	44.653	0	36.967	38.723	5.135	14.735	15.233	0	17.248	10.111	0	3.298	3.143	0	0	0	0	0	0	0	0	0	0	0	0	0	0	0	0	0	0
17863	Myb	0.601	2.882	4.243	3.119	8.021	7.87	4.406	13.458	10.397	11.557	13.432	10.122	5.692	21.879	12.607	4.118	7.228	15.116	6.11	17.23	13.127	0.415	10.702	4.428	0.888	0.61	0.75	0.474	0.921	0.941	0	0.972	0	0	0	0	0	0	0	0	0	0	0	0	0
17864	Mybl1	0.543	2.603	2.235	1.375	4.596	4.885	3.02	2.296	4.578	2.108	4.052	4.893	1.221	15.99	3.993	0	2.227	8.793	0	4.49	2.703	0	2.923	1.904	0	0	0	0	0	0	0	0.878	0	0	0	0	0	0	0	0	0	0	0	0	0
17865	Mybl2	0	0	0	0	0	1.471	0.962	0	0	0.139	2.264	3.315	4.446	11.286	1.238	0	0.529	5.571	0	0	0	0	0	1.75	0	0	0	0	0	0	0	0	0	0	0	0	0	0	0	0	0	0	0	0	0
17869	Myc	26.726	20.915	23.713	6.156	5.138	16.032	13.992	0	3.226	0	13.672	0	0	2.971	7.666	0	1.22	1.474	7.83	2.432	2.976	0	0	0	0	2.345	2.062	0	0	0	4.101	5.138	0	0	0	0	0	0	2.302	0	0	0	0	0	0
17876	Myef2	57.314	112.259	93.092	3.41	10.967	7.875	0.909	2.766	0	0	0	0	0	0	0	0	0	0	0	0	0	0	0	0	4.825	2.283	50.31	4.266	14.146	17.415	6.809	11.247	186.877	200.343	275.354	225.411	394.268	268.063	306.093	587.965	135.4	120.258	272.927	259.027	303.193
18018	Nfatc1	6.57	17.196	16.927	7.894	5.481	2.738	8.724	12.444	6.415	10.762	10.219	16.422	15.307	9.605	9.101	26.363	12.515	15.377	34.315	19.138	20.744	38.576	43.269	28.696	29.957	17.499	15.827	43.089	63.937	39.417	109.767	83.301	43.542	27.1	35.55	38.002	48.768	28.999	41.398	162.675	50.594	56.738	48.515	50.26	49.334
18019	Nfatc2	0	1.1	0.258	0.323	1.267	0.476	0.953	0	0	0	0	0.808	0	0	0	0	0	0	7.455	3.352	4.872	6.396	3.842	3.539	7.229	5.029	5.093	4.783	1.939	0	14.09	11.453	0	0	0	11.502	0.496	2.15	0.807	1.962	0	0	0	0	0
18021	Nfatc3	7.74	21.155	21.388	18.729	25.381	27.024	24.595	16.318	18.503	22.06	19.375	20.274	21.495	21.63	14.672	47.609	46.671	13.519	44.222	57.559	17.803	30.266	84.674	64.621	28.209	26.524	10.358	21.505	19.553	24.293	60.669	32.679	34.791	16.106	18.683	15.577	16.117	22.702	33.276	71.276	49.642	38.685	27.363	25.238	27.15
18022	Nfe2	222.979	129.532	121.589	93.573	64.942	62.576	75.471	116.65	56.907	47.256	77.462	86.546	51.816	32.805	24.952	56.866	22.875	15.881	61.527	53.887	47.553	19.979	7.307	18.075	15.208	19.257	20.5	17.789	7.074	7.975	11.646	8.365	0	0	0	0	0	0	0	0	0	0	0	0	0
18023	Nfe2l1	0	0	0	0	0	0	0	0	0	0	0	0.444	0	0	0	0	0	0	0	0	0	0	0	0	0	0	0	0	0	0	0	0	0	0	0	0	0	0	0	0	0	0	0	0	0
18024	Nfe2l2	7.249	1.088	1.675	5.481	0.632	0.825	3.726	3.436	0.412	1.516	0	0	0	0	1.958	0	0.464	0.698	0	0.717	0.628	0	0.775	0.554	0	0	0	0	0	0	1.124	0	0	0	0	0	0	1.097	0	0	0	0	0	0	0
18027	Nfia	224.503	232.568	292.374	138.687	122.848	123.832	111.407	119.65	99.183	67.861	198.949	192.496	276.244	260.778	284.312	686.797	351.324	357.417	732.171	522.105	435.974	1097.03	929.36	839.295	1139.15	1166.37	1026.62	1316.87	1183.91	1616.9	2842.32	1801.13	4707.13	4294.25	3673.36	4175.84	4141.61	3903.29	4944.09	3866.78	4142.6	4251.62	5454.3	5083.36	3689.73
18028	Nfib	363.841	363.581	310.569	181.343	176.421	195.873	131.84	219.467	204.445	108.457	247.352	249.969	357.901	376.467	406.863	737.294	477.448	415.06	761.494	706.03	639.657	1390.71	1102.66	997.873	1298.51	1363.22	1127.06	1701.2	1556.07	1783.26	3960.37	2166.61	3812.01	3920.42	3827.77	3816.57	3875.6	3249.37	4156.74	3359.47	3753.11	3559.1	4604.41	4233.3	3642.63
18029	Nfic	253.529	165.95	172.328	176.877	97.071	139.45	88.358	126.21	76.886	35.617	140.168	136.639	210.498	175.558	207.755	418.194	228.255	259.388	432.445	305.232	311.806	678.874	557.806	583.291	1031.32	914.844	772.944	716.521	1203.51	1194.67	3136.05	2162.34	4781.2	3821.79	4039.84	4062.25	5063.78	2953.58	3569.05	4304.15	4741.7	5037.66	5066.39	5394.83	4207.93
18030	Nfil3	4.619	1.968	0	0	1.027	1.011	0.486	1.337	0	0	0	0	0	0	0	3.46	1.285	1.363	0	3.898	3.45	9.532	2.703	2.351	3.964	0	0	0.434	13.463	0	27.683	15.548	53.967	1.449	6.909	1.366	19.942	13.003	21.849	106.254	37.326	36.64	15.461	6.521	5.944
18032	Nfix	178.087	107.247	85.083	123.918	80.108	82.244	87.947	112.778	53.71	18.14	140.95	135.769	225.517	119.959	209.111	406.824	214.323	215.405	350.948	296.734	272.658	610.525	514.459	478.887	755.977	603.666	522.307	622.79	629.275	807.798	2450.2	1795.86	3322.82	2900.87	4024.44	3096.33	3106.02	3305.17	3641.47	3254.55	3891.42	3488.75	3426.62	3385.75	2691.72
18033	Nfkb1	4.386	0.863	1.291	5.288	0.9	1.883	6.772	2.769	4.727	2.741	12.111	3.277	4.095	5.776	4.367	15.135	12.239	10.799	11.438	1.454	1.318	3.269	0	1.423	0	0	0	0	0	0	11.939	6.996	0	12.008	8.519	9.587	8.193	10.541	10.551	13.966	10.613	10.212	21.585	20.11	18.624
18034	Nfkb2	0	0	0	0	0	0	0	0	0	0	0	0	0	0	0	0	0	0	0	0	0	0	0	0	0	0	0	0	0	0	0.184	0	0.75	0	0	0	0	0	0	3.955	0.556	0.298	1.618	0	2.248
18044	Nfya	3120.13	3216.66	2436	3143.95	1640.37	1899.53	2243.82	3901.96	1232.84	432.84	1148.67	448.026	2386.06	678.761	615.997	985.086	444.538	486.686	243.741	662.931	551.587	1140.02	857.762	545.583	1709.7	1800.7	1808.63	1473.8	1451.48	1736.25	1473.3	3121.26	784.307	1094.95	1211.04	1188.77	704.38	1077.93	1020.6	1572.67	532.206	576.77	946.947	421.232	741.847
18045	Nfyb	399.628	278.768	386.701	540.534	223.423	254.548	323.041	67.753	130.501	0	3.555	3.026	313.486	54.685	54.359	22.68	31.443	0	16.699	33.548	0	202.871	18.374	48.219	0	0	56.591	62.006	0	0	893.484	625.841	32.739	55.46	65.028	4.326	33.529	34.161	0	659.768	47.573	42.553	0	510.704	30.312
18046	Nfyc	5008.59	9392.3	8355.44	6720.28	6691.6	7352.03	4768.39	6618.93	6114.86	918.707	2095.87	893.835	3799.18	3896.75	3009.5	1545.24	1581.1	1760.98	640.026	2666.27	2132.86	2054.85	3661.05	3555.25	7782.73	6367.14	6139.43	6372.17	5912.91	5842.18	4210.18	5034.43	2504.07	4308.43	4760.14	4246.36	3000.47	3040.5	3372.35	3521.28	2429.5	2822.82	2432.09	2432.63	2240.65
18088	Nkx2-2	0	0	0	0	0	0	0	0	0	0	0	0	0	0	0	0	0	0	0	0	0	0	0	0	0	0	0	0	0	0	0	0.05	0	0	0	0	0	0	0	0	0	0	0	0	0
18089	Nkx2-3	0	0	0	0	0	0	0	0	0	0	2.443	0	0	0	0	0	0	0	0	0	0	0	0	0	0	0	0	0	0	0	0	0.05	0	0	0	0	0	0	0	0	0	0	0	0	0
18095	Nkx3-1	0	0	0	0	0	0	0	0	0	0	0	0	0	0	0	0	0	0	0	0	0	0	0	0	0	0	0	0	0	0	0	0	0	0	0	0	0	0	0	0	0	0	0	17.428	14.513
18103	Nme2	0	0	0	0	0.788	0.237	0	0	0	0	12.127	0	0.888	0	0	2.062	0	1.602	0	0	104.949	18.893	0	0	0	0	0	0	44.206	85.996	1.623	0.797	0	0	111.362	0	0	0	0	1.435	18.006	0	0	14.243	0
18109	Mycn	4.422	8.161	11.939	2.189	0	0	0	2.615	0	0	0	3.471	0	0	0	0	0	0	0	0	0	0	0	0	0	0	0	0	0	0	0	0	0	0	0	0	0	0	0	0	0	0	0	0	0
18143	Npas2	0	0.469	0.368	0	0.479	0.492	0	0.063	0.671	0	1.055	1.293	2.166	3.104	3.927	3.742	2.664	3.98	3.521	3.909	1.703	8.85	7.24	6.089	3.08	2.041	3.99	7.91	8.937	7.103	6.785	7.639	38.057	7.747	12.84	13.149	22.805	22.899	22.768	37.558	13.662	19.701	22.45	33.435	32.033
18171	Nr1i2	0	0	0	0	0	0	0	0	0	0	0	0	0	0	0	0	0	0	0	0	0	0	9.966	19.476	0	0	0	0	0	0	0	22.419	0	0	16.293	0	0	0	10.276	8.93	4.626	2.331	0	0	0
18181	Nrf1	148.23	309.53	328.433	512.127	716.49	717.358	590.835	1161.71	900.547	787.912	789.548	976.723	1283.3	1505.62	1733.42	940.031	1078.75	1241.32	591.989	1620.97	1335.14	457.64	1441.4	1175.8	748.622	595.422	730.656	626.111	893.147	837.333	970.972	763.767	446.68	360.691	398.305	474.529	387.982	305.669	378.377	490.712	403.037	412.476	268.858	375.343	337.377
18420	Otp	0	0	0	0	0	0	0	0	0	0	0	0	0	0	0	0	0	0	0	0	0	0	0	0	0	0	0	0	0	0	0.96	0.567	0	0	0	0	0	0	0	0	0	0	0	0	0
18504	Pax2	0	0	0	0	0	0	0	0	0	0	0	0	0	0	0	0	0.776	0.808	0	0	0	0	0	0	0	0	0.634	0	0	0	0	0.67	0	0.605	0	0	0	0	0	0	0	0	0	0	0
18507	Pax5	0	0	0	0	0	0	0	0	0	0	0	0	0	0	0	0	0.776	0.808	0	0	0	0	0	0	0	0	0.634	0	0	0	0	0.67	0	0.605	0	0	0	0	0	0	0	0	0	0	0
18510	Pax8	0	0	0	0	0	0	0	0	0	0	0	0	0	0	0	0	0.6	0.625	0	0	0	0	0	0	0	0	0.49	0	0	0	0	0	0	0.467	0	0	0	0	0	0	0	0	0	0	0
18514	Pbx1	39.221	68.706	58.178	13.899	29.057	30.514	10.466	22.737	2.977	0	0	1.508	4.671	2.583	2.322	9.561	0	2.49	7.414	2.607	0	0.895	4.023	0	4.18	0.768	6.649	8.573	3.898	4.629	17.332	60.03	2.557	21.024	18.87	27.488	19.431	19.967	11.651	31.242	8.845	6.139	7.823	1.747	1.513
18515	Pbx2	46.84	92.413	106.882	41.649	53.52	54.933	26.317	20.588	23.946	3.902	1.922	5.107	8.258	12.958	11.062	6.179	11.025	10.643	5.143	7.255	8.568	2.891	3.156	0.851	5.105	4.747	2.944	2.557	5.091	1.915	11.168	25.704	8.81	9.69	7.531	6.704	12.446	17.233	20.099	22.348	5.649	2.359	6.154	0	6.956
18516	Pbx3	41.418	53.244	55.51	10.326	18.543	24.835	11.142	15.344	4.833	0	0	0.477	1.535	0.49	0.858	7.317	0.858	0.92	7.189	3.096	0	0	2.519	0	0	0.745	2.805	0.972	0	4.489	4.723	30.772	0	0	2.15	9.555	12.75	7.601	8.557	0	1.664	0	0	0	1.115
18673	Phb	7.178	28.326	59.338	12.319	72.815	35.118	29.521	125.578	181.632	105.233	103.591	98.937	88.909	38.404	48.377	209.204	47.691	44.692	261.328	67.493	71.578	41.545	64.011	56.085	155.108	168.919	72.318	172.932	285.861	398.472	132.902	143.53	114.997	327.921	309.796	270.878	162.471	385.801	287.626	152.799	80.908	109.984	237.583	259.79	241.18
18740	Pitx1	0	0.643	0.649	0	0	0	0	0	0	0	0	0	0	0	0	0	0	0	0	0	0	0	0	0	0	0	0	0	0	0	0	0	0	0	0	0	0	0	0	0	0	0	0	0	0
18741	Pitx2	0	0.682	0.688	0	0	0	0	0	0	0	0	0	0	0	0	0	0	0	0	0	0	0	0	0	0	0	0	0	0	0	0	0	0	0	0	0	0	0	0	0	0	0	0	0	0
18742	Pitx3	0	0.643	0.649	0	0	0	0	0	0	0	0	0	0	0	0	0	0	0	0	0	0	0	0	0	0	0	0	0	0	0	0	0	0	0	0	0	0	0	0	0	0	0	0	0	0
18771	Pknox1	27.63	8.68	13.563	23.01	6.064	6.098	20.293	18.633	3.325	0	1.211	1.867	4.536	3.707	3.538	0	4.034	3.295	0.738	2.647	4.279	1.543	0	1.485	2.287	2.371	1.948	0	3.049	2.88	8.154	29.104	3.641	4.4	5.693	5.073	6.247	5.169	4.85	18.638	8.03	8.331	2.919	2.55	2.65
18933	Prrx1	1.01	0	0	0	0	0	0	0	0	0	0	0	0	0	0.496	0	0	0	1.249	1.727	1.725	1.141	1.053	1.063	0	0	0	0	0	0	7.757	9.989	0	0	0	0	0	0	0	3.985	0	0	0	0	0
18935	Phox2b	0	0	0	0	0	0	0	0	0	0	0	0	0	0	0	0	0	0	0	0	0	0	0	0	0	0	0	0	0	0	1.135	0.67	0	0	0	0	0	0	0	0	0	0	0	0	0
18986	Pou2f1	0.789	8.435	7.195	33.415	28.852	3.552	55.08	75.915	78.662	5.529	46.068	53.124	61.88	114.198	75.266	5.241	26.136	17.78	54.856	11.765	4.992	2.473	0	0	4.327	0	0	0.796	4.824	0	0.978	20.926	1.617	6.759	0	7.67	8.141	6.413	4.147	8.685	5.254	5.387	6.843	0	0
18987	Pou2f2	0.753	4.632	5.134	2.547	2.609	2.086	7.938	13.011	12.495	3.667	8.399	7.461	11.144	11.226	5.415	2.261	5.805	13.617	6.562	7.402	3.704	0.863	0	0	4.133	0	0	0.76	4.607	0	0.934	3.913	1.544	6.455	0	7.325	7.775	6.125	3.961	5.31	5.017	5.145	6.535	0	0
18988	Pou2f3	0.668	4.108	4.553	26.521	19.888	1.85	39.27	55.067	57.868	3.252	32.911	35.65	38.873	90.494	57.981	2.005	19.268	12.078	37.155	6.566	3.285	0.765	0	0	3.666	0	0	0.674	4.086	0	0.828	3.471	1.369	5.725	0	6.497	6.896	5.432	3.513	4.71	4.45	4.563	5.796	0	0
19013	Ppara	0	0	0	2.311	0	0	2.469	2.935	2.142	1.151	6.896	0	5.036	18	16.592	0	28.863	28.128	0	1.995	2.12	11.965	1.542	2.501	2.713	4.958	6.241	2.897	2.712	2.97	99.319	110.781	52.127	82.359	62.98	74.028	24.333	45.93	33.307	197.69	47.436	60.04	62.579	56.922	52.62
19015	Ppard	0	0	0	0	0	0	0	11.861	0	23.299	11.367	9.522	14.655	0	0	0	0	0	26.666	0	0	0	0	0	0	0	0	0	0	0	10.986	11.279	0	0	0	0	0	0	0	37.416	0	4.01	0	0	0
19016	Pparg	0	0	0	0.548	0	0	0.101	0	0	0	0	0	0	0	0.9	0	0	0	0	0	0	1.247	0	0	0	0	2.724	0	13.862	0	14.597	8.297	0	0	0	0	35.96	20.497	1.915	5.361	0.834	0	0.699	0	19.589
19130	Prox1	1.891	5.759	4.698	27.2	13.443	10.771	11.689	11.972	41.802	32.163	65.305	56.634	61.623	48.49	50.527	49.672	49.858	66.845	34.086	61.14	63.135	20.46	37.664	30.367	9.971	21.248	13.346	43.363	34.826	31.969	39.377	106.643	77.413	100.472	127.794	92.882	94.535	105.717	78.948	228.241	47.946	76.365	28.448	57.124	50.891
19290	Pura	7.155	15.944	6.11	15.269	40.71	21.862	6.961	7.969	116.867	1.442	25.283	7.327	60.093	144.576	72.488	13.639	36.662	87.464	19.49	127.69	118.28	133.246	138.196	196.763	273.945	174.999	198.06	624.422	519.564	453.892	560.048	292.258	1036.2	981.849	1072.66	975.869	867.872	758.233	660.531	2802.74	637.632	1086.8	865.399	973.108	996.196
19291	Purb	38.299	98.718	121.484	69.266	97.846	155.557	72.177	43.85	174.258	18.741	71.784	55.303	232.676	230.126	308.066	61.873	211.968	240.207	49.48	350.22	237.681	262.532	443.011	416.356	293.479	287.158	337.289	234.332	560.09	556.752	429.668	303.573	745.849	737.384	374.191	658.916	611.814	580.009	667.805	1087.03	778.319	576.032	708.85	728.545	749.161
19401	Rara	3.844	8.52	7.212	0.62	1.516	5.422	1.207	5.939	11.462	0.096	2.396	3.091	7.95	0.751	3.561	0.184	2.574	4.902	0.104	0.631	0.402	0.601	0	0	0.569	0.932	1.757	0	0.576	1.303	12.812	14.38	24.44	17.257	3.795	13.809	9.536	14.392	1.539	38.85	37.654	10.313	26.739	3.258	3.316
19411	Rarg	6.201	7.108	9.923	1.267	2.949	3.829	1.563	2.11	1.53	0.084	0.499	0.312	5.083	0.652	0.645	0.16	0.736	0.776	0.09	0.548	0.349	1.335	0	0	0.494	1.318	0.372	0	0.5	1.131	22.977	20.994	15.202	20.014	6.588	4.313	4.847	10.312	8.953	41.755	10.262	3.441	2.378	2.828	9.04
19434	Rax	0	0	0	0	0	0	0	0	0	0	0	0	0	0	0	0	0	0	0	0	0	0	0	0	0	0	0	0	0	0	0.694	0.41	0	0	0	0	0	0	0	0	0	0	0	0	0
19664	Rbpj	117.826	359.138	273.211	107.063	375.069	524.678	161.207	330.099	224.595	217.886	246.593	221.017	236.29	387.433	417.138	467.962	375.594	411.156	276.909	349.023	338.802	85.498	350.277	314.296	151.347	241.629	202.763	188.09	237.188	239.779	195.507	263.65	245.027	268.493	288.402	225.192	296.429	289.805	281.768	182.345	241.265	240.383	380.01	182.001	382.496
19668	Rbpjl	5.174	18.895	16.206	5.768	17.726	19.018	6.668	16.098	16.293	4.473	11.463	12.785	12.926	15.786	14.47	10.787	14.351	13.642	9.686	14.679	12.012	3.621	11.667	9.344	10.182	9.519	8.412	12.698	13.974	12.504	12.25	11.132	9.877	9.801	11.958	11.085	9.49	8.909	9.589	14.875	7.622	7.636	9.06	10.092	9.515
19697	Rela	0	0	0	0	0.326	0	0	0	0	0	0	0	0	0	0	0	0	0	0	0	0	0	0	0	0	0	0	0	0	0	0	0	0	0	0	0	0	0	0	0	0	0	0	0	0
19698	Relb	0	0	0	0	1.477	0	0	0	0	0	0	0	0	0	0	0	0	0	0	0	0	0	0	0	0	0	0	0	0	0	0	0	0	0	0	0	0	0	0	0	0	0	0	0	0
19712	Rest	20.911	3.759	0.725	2.406	0.106	15.41	1.666	4.437	0	1.28	0.875	1.227	1.859	1.361	1.311	0	0.427	0.644	1.881	0.527	0.685	0.77	1.021	0.424	0.281	0.546	0.669	0.943	0.739	2.088	0	4.187	0	0.502	1.421	0	0	1.246	1.262	0.555	0.172	0.399	0	0	0
19724	Rfx1	29.597	76.805	51.737	44.833	44.82	45.752	25.692	23.871	5.702	9.881	3.827	3.159	0	12.503	18.879	24.356	7.76	24.35	19.385	16.475	25.182	11.403	9.912	9.839	20.535	32.468	28.765	37.823	47.786	53.88	48.986	56.165	44.25	71.115	67.513	64.446	58.143	58.15	61.261	113.323	56.908	48.647	35.157	38.622	33.805
19725	Rfx2	8.352	11.83	5.954	12.682	8.91	6.218	19.164	13.279	1.93	8.817	8.405	4.92	6.371	12.096	22.652	15.681	2.79	20.971	18.347	12.251	20.593	2.566	1.548	1.523	1.028	8.269	8.026	5.421	11.091	16.669	13.823	3.945	9.326	13.141	12.519	12.334	7.478	7.998	14.946	12.911	11.548	7.477	6.841	8.096	7.953
19726	Rfx3	4.989	12.705	9.713	8.353	5.534	8.895	4.588	2.863	1.352	3.158	3.784	5.599	8.349	5.139	4.282	2.707	4.47	7.176	10.06	7.809	6.641	2.207	2.909	2.501	2.344	0	1.806	0	3.349	0	5.921	9.926	8.565	0	4.525	0	4.776	3.651	8.877	9.453	6.621	3.276	6.022	1.198	0
19727	Rfxank	0	1.501	0.73	0.43	0.63	1.475	1.42	1.691	0.724	0.509	0	7.162	0	0	0.504	0	0	0	0	0	0	0	0	0	0	0	0	0	0	0	0	50.988	0	0	0	1.708	4.103	3.09	1.703	0	90.974	2.314	0	1.39	0
19883	Rora	0	0	0	0	0	0	0	0	0	0	0	0	0	0	0	0	0	0	0	0	0	0	0.363	0.236	0	0	0	0.436	0	0	2.371	0.605	0	1.055	9.098	6.019	16.577	13.762	19.309	25.048	1.111	0	1.994	2.282	0
19885	Rorc	0	0	0	0	0	0	0	0	0	0	0	0	0	0	0	0	0	0	0	0	0	0	0	0	0	0	0	0	0	0	0	0	0	0	0	0	3.183	15.103	12.144	8.194	0.375	2.321	0	0	0
20024	Sub1	427.572	3062.27	3021.41	842.403	6233.01	5138.46	506.099	704.506	5752.02	1242.82	1250.03	1465.24	1415.38	7616.85	6889.55	3531.64	9481.14	9568.04	2337.19	10346.2	8553.11	3029.98	8654.7	8638.42	11912.5	8789.22	12458.4	13601.8	10843.1	11465.6	8007.4	592.066	5760.41	5545.41	6269.12	5959.29	5576	5231.31	4857.9	2542.48	4350.21	4504.81	4634.36	6668.47	5270.19
20181	Rxra	73.334	100.205	60.822	43.931	80.092	73.007	62.152	72.523	66.738	19.615	48.78	26.036	85.873	77.811	90.893	59.1	123.434	134.59	55.869	90.479	99.589	80.004	120.684	119.995	154.642	127.428	118.424	182.345	208.904	217.306	453.371	504.594	926.779	663.985	760.479	764.783	1025.8	1073.51	1168.4	1810.65	1190.93	1276.23	761.691	929.713	1125.39
20182	Rxrb	62.148	89.611	85.021	40.671	61.559	75.556	42.201	85.897	48.641	17.811	44.379	20.083	35.929	28.668	52.368	18.996	54.842	67.874	9.294	23.199	44.988	23.279	30.214	29.924	20.854	11.844	10.194	19.299	27.465	22.276	126.759	129.264	191.382	153.81	154.615	159.567	254.112	198.838	174.567	576.291	294.392	399.749	141.151	162.809	151.276
20183	Rxrg	11.897	28.254	15.354	8.467	17.766	21.611	14.096	27.406	12.614	9.673	18.713	14.949	25.207	26.819	25.355	25.913	34.043	38.065	35.223	32.699	29.193	17.887	34.004	31.228	35.971	33.725	31.974	35.222	55.05	58.574	192.211	132.085	286.67	202.832	227.135	275.881	390.743	337.965	380.107	491.834	364.697	426.381	231.706	229.105	335.46
20185	Ncor1	0	0	0.026	0	0	0	0	0	0	0	0	0	0.077	0	0	0	0	0	0	0	0	0.143	0	0	0	0	0	0	0	0	0	0	0.105	0.251	0	0	1.21	1.961	0	4.902	2.224	2.266	0.508	0	0.42
20186	Nr1h4	1.079	0.626	0	4.158	0.904	0.805	1.239	1.614	0	0	0	0	0	0	0	0	0.694	0.677	0.513	0.959	0.139	1.781	1.154	3.176	3.153	5.003	1.704	2.955	3.681	3.754	28.719	28.872	63.331	37.379	52.972	46.615	102.957	115.378	132.904	314.005	105.109	78.102	67.091	75.468	70.038
20204	Prrx2	2.485	3.86	0	0	0	0	0	0	0	0	0	0	0	0	0.525	0	0	0	1.323	1.829	1.826	1.208	1.115	1.125	0	0	0	0	0	0	8.214	7.9	0	0	0	0	0	0	0	4.219	0	0	0	0	0
20230	Satb1	0	0	0	0	2.406	2.658	0	0	0	0	0	0	0	0	0	0	0	0	0	0	0	0	0	0	0	0	0	0	0	0	0	0	0	0	0	0	0	0	0	0	0	0	0	0	0
20289	Scx	0	0	1.161	0	0	0	0	0	0	0	0	0	0	0	0	0	0	0	0	0	0	0	0	0	0	0	0	0	0	0	0	0	0	0	0	0	0	0	0	0	0	0	0	0	0
20371	Foxp3	0	0	0	0	0	0	0	0	0	0	0	0	0	0	0	0	0	0	0	0	0.11	0	0	0	0	0	0	0	0	0	0	0	0	0	0	0	0.363	0	0	0	0.156	0.314	0	0	0
20429	Shox2	0	0	0	0	0	0	0	0	0	0	0	0	0	0	0	0	0	0	0	0	0	0	0	0	0	0	0	0	0	0	0.734	0.434	0	0	0	0	0	0	0	0	0	0	0	0	0
20464	Sim1	0	0	0	0	0	0	0	0	0	0	0	0	0	0	0	0	0	0	0	0	0	0	0	0	0	0	0	0	0	1.628	0	0	0	0	0	0	0	0	0	0	0	0	0	0	0
20465	Sim2	0	0	0	0	0	0	0	0	0	0	0	0	0	0	0	0	0	0	0	0	0	0	0	0	0	0	0	0	0	2.086	0	0	0	0	0	0	0	0	0	0	0	0	0	0	0
20475	Six5	0.149	0.111	0	0	0	0	0	0	0	0	0	0	0	0	0	0	0	0	0	0	0	0	0	0	0	0	0	0	0	0	0	0	0	0	0	0	0	0	0	0	0	0	0	0	0
20588	Smarcc1	15.483	50.283	57.265	14.287	43.528	46.933	33.19	15.932	22.722	20.628	5.633	4.847	8.282	10.405	13.965	32.286	11.849	5.167	13.909	6.3	12.28	7.099	13.912	5.43	26.69	16.097	9.607	33.043	30.457	42.179	21.093	40.777	18.594	27.596	42.243	42.301	28.538	43.019	53.1	51.902	15.248	13.196	16.234	35.156	10.584
20602	Ncor2	0	0	0	0	0	0	0	0	0	0	0	0	0	0	0	0	0	0	0	0	0	0	0	0	0	0	0	0	0	0	0.148	0	0.256	1.062	0.253	0.201	0.59	1.418	42.559	14.482	34.024	0	0	0	0.077
20658	Son	16.79	24.088	22.662	45.198	39.382	52.149	32.985	256	69.877	28.873	43.814	17.936	101.426	114.547	79.797	89.18	36.815	37.28	16.998	45.85	33.816	21.919	74.599	57.248	40.081	47.684	67.437	102.611	106.634	128.473	74.371	119.03	82.764	50.136	64.194	58.54	26.822	20.67	23.861	35.759	51.027	62.664	42.556	38.02	55.762
20666	Sox11	0	0	0	0	0	0	0	0	0	0	0.739	1.711	0	0	0	0	0	0	0	0.666	0	0	0	0	0	0	0	0	0	0	0	2.198	0	0	0	0	0	0	0	0	0	0	0	0	0
20667	Sox12	0	0	0	0	0	0	0.205	0	0	0	1.628	2.439	0	0	0	0	0	0	0	0	0	0	0	0	0	0	0	0	0	0	0	0.846	0	0	0	0	0	0	0	0	0	0	0	0	0
20668	Sox13	8.624	6.729	2.774	3.728	3.132	3.956	3.425	3.803	4.168	0	2.493	0.942	1.52	4.437	4.163	3.142	3.479	3.772	0	0	2.581	1.24	0	1.764	2.661	2.492	2.491	2.457	0	2.799	0	3.235	1.948	0	0	1.797	0	0	0	4.282	0	1.559	0	0	0
20671	Sox17	0.24	0	0	0	0	0	0.614	0	0	0	0	0.423	0.764	0	0	0	0	0	1.883	0	0	1.013	0	0.44	0	0	0	0	0	0	0.917	1.237	3.76	0	1.27	1.221	1.078	0	1.16	0	1.952	1.995	0	2.336	0
20672	Sox18	0	0	0	0	0	0	0.378	0	0	0	0	0.423	0.764	0	0	0	0	0	1.883	0	0	1.013	0	0	0	0	0	0	0	0	0.917	1.237	3.76	0	1.27	1.221	1.078	0	1.16	0	1.952	1.995	0	2.336	0
20677	Sox4	0	0	0	0	0	0	0	0	0	0	0.609	1.409	0	0	0	0	0	0	0	0.549	0	0	0	0	0	0	0	0	0	0	0	2.854	0	0	0	0	0	0	0	0	0	0	0	0	0
20678	Sox5	36.618	31.47	32.669	19.862	22.272	23.907	8.249	10.521	19.788	5.157	8.817	6.216	7.346	26.172	16.398	8.918	10.969	14.956	4.866	5.437	7.218	3.778	6.697	6.633	9.654	2.282	5.651	18.031	12.251	15.718	5.633	14.771	12.284	23.265	25.65	40.105	22.199	18.984	22.905	21.87	11.776	10.639	11.484	0	19.052
20679	Sox6	79.778	56.009	64.528	47.753	39.914	46.339	15.489	18.403	14.214	4.51	7.71	5.436	6.423	22.886	10.998	7.798	9.592	8.84	4.255	4.754	6.312	3.304	2.755	3.464	8.442	1.996	1.994	15.767	9.119	2.241	8.026	12.176	10.741	15.454	13.418	20.565	12.068	1.256	7.183	8.498	4.77	3.453	0	0	0
20680	Sox7	0	0	0	0	0	0	858.059	0	0	0	0	0	0	0	0	0	0	0	0	0	0	0	0	0	0	0	0	0	0	0	0	0	0	0	0	0	0	0	0	0	0	0	0	0	0
20681	Sox8	0	0	0	0	0	0	0.336	0	0	0	0	0.376	0.679	0	0	0	0	0	1.674	0	0	0.9	0	0	0	0	0	0	0	0	0.815	1.1	3.342	0	1.129	1.086	0.958	0	1.031	0	1.735	1.774	0	2.076	0
20682	Sox9	0	0	0	0	0	0	0.302	0	0	0	0	0.338	0.611	0	0	0	0	0	1.507	0	0	0.81	0	0	0	0	0	0	0	0	0.734	0.99	3.008	0	1.016	0.977	0.862	0	0.928	0	1.562	1.596	0	1.869	0
20683	Sp1	6.933	3.397	0	5.708	0	0	0	0.948	0	0	0	0	0	0	0	0	0	0	0	0	0	0	0	0	0.942	0	0	0.816	0	0	0	0	0	0	0	0	6.64	1.128	0	0	3.051	0	0	0	0
20684	Sp100	0	0	0	0	0	0	0	2.095	0	1.569	4.805	3.136	1.718	2.04	3.074	0	1.171	1.064	0	10.99	4.847	6.152	18.275	16.519	3.303	18.035	18.029	15.921	13.052	14.063	5.501	21.937	14.526	15.706	18.744	16.409	156.002	9.827	11.227	161.353	8.872	6.373	15.541	17.443	16.879
20687	Sp3	524.683	449.763	294.71	544.872	227.043	247.786	399.046	452.723	174.046	297.165	146.662	114.522	221.206	143.258	240.907	321.566	67.969	62.174	80.387	41.663	54.366	49.648	148.878	151.018	149.449	246.716	139.935	252.955	92.463	152.066	127.088	187.079	100.076	304.862	180.517	313.565	207.119	215.014	172.891	125.788	130.873	109.841	64.7	97.25	64.71
20688	Sp4	0	0.833	0	0	0	0.862	0.765	1.66	0	0	0	0	0	0	0	0	0	0	0	0	0	0	0	0	0	0	0	0	0	0	0	0	0	0	0	0	0	2.062	0	0	0	0	0	0	0
20689	Sall3	0	0	0	0	0.052	0	0	0	0	0	0	0	0	0	0	0	0	0	0	0	0	0	0	0	0.079	0.092	0.072	0.196	0.208	0.237	0.151	0.224	0	0.451	0.366	0.482	0.693	1.386	1.362	0	0	0	0	0	0
20787	Srebf1	4.03	1.396	1.426	0.583	2.664	0.883	0.908	12.869	0.784	0	0.793	7.69	10.803	3.64	3.175	1.567	2.113	0.505	0	4.895	6.246	0	0	0	2.46	2.294	0	7.712	9.48	1.142	1.749	29.849	2.468	12.217	9.241	10.486	30.896	26.08	124.681	12.2	5.642	5.258	6.292	7.561	8.739
20788	Srebf2	2.532	26.786	18.677	0.987	7.633	26.226	2.865	3.714	14.067	0	2.29	1.967	3.013	18.202	15.058	0	4.747	0	0	1.273	18.236	0.753	0	0	0	0	0	0	0.455	14.126	2.142	1.954	0.863	0	0	0	14.989	1.607	42.404	1.963	21.069	18.56	0	0	28.955
20807	Srf	0.884	0.868	0	78.102	7.484	7.636	5.279	6.446	5.175	166.978	7.524	2.257	7.729	5.286	8.349	300.614	3.028	4.164	379.529	0	8.165	0.459	0	2.169	4.454	0	1.411	0	2.244	7.906	0	19.275	0	541.22	9.056	633.603	5.897	0	0	5.354	4.431	0	0	0	4.398
20833	Ssrp1	72.715	92.954	76.286	105.455	27.597	23.135	69.165	159.038	41.143	11.95	28.412	91.762	126.995	102.514	74.582	40.286	5.58	10.394	103.763	71.709	71.712	144.004	86.931	19.512	6.448	9.733	45.102	22.177	81.737	84.938	11.315	64.335	6.569	64.052	10.985	6.263	2.038	2.992	2.744	2.142	40.021	7.479	3.107	2.508	1.395
20841	Zfp143	0	2.158	0	0.432	0.076	1.732	0	0	0.739	0	0	0	0	0	0	0	0	0	0.83	0	0	0	0	0	0	0	0.331	0	0.461	1.114	0	0.766	0	0	0	0	0.467	0	0	0	0	0	0	0	0
20846	Stat1	0	0	0	0	0	0	0	0	0	0	0	0	0	0	0	0	0	0	0	1.192	0.478	0	0	2.76	1.431	1.871	2.777	0.557	3.977	3.913	0.494	2.422	0	1.594	0	0.942	0	1.297	2.304	0	0.45	1.099	0	0	1.538
20847	Stat2	0	0	0	0	0	0	2.306	0	0	0	0	0	0	0	0	0	1.405	0	0	0	0	0	0	0	0	0	0	0.655	0	0.97	0	0	0.735	3.156	1.471	4.506	3.153	0.748	0	1.211	0	0.818	0.711	1.046	0
20848	Stat3	0	0.135	0	0	0	0	0	0	0	0	0.328	0.266	0.401	0.216	0.193	1.706	44.731	57.548	0.505	36.655	42.709	0.217	51.466	42.02	38.176	31.634	30.234	44.194	39.416	78.08	1.54	5.933	132.231	33.744	2.265	38.442	3.667	4.076	4.654	8.747	48.162	40.614	83.225	102.829	19.29
20850	Stat5a	0	0	0	0	0	0	0	0	0	0	0.176	0.212	0.707	0	0	0.197	0	0	0	1.093	1.166	0	0	0	0	0	0	0	0	0	0	0	19.999	0	0.429	0.571	0.709	0.7	0	21.755	2.984	4.04	0	0	0
20851	Stat5b	0	0	0	0	0	0	0	0	0	0	0.18	0.217	0.724	0	0	0.202	0	0	0	1.119	1.193	0	0	0	0	0	0	0	0	0	0	0	19.33	0	0.439	0.585	0.725	0.717	0	21.799	3.525	4.644	0	0	0
20893	Bhlhe40	0	0	0	0	0	0	0	0	0	0	0	0	47.624	0.405	0.439	6.849	1.47	7.284	6.218	8.266	2.9	2.682	2.916	0.884	0	0.575	0.502	0.897	7.197	0.98	18.265	11.094	0	14.163	14.34	66.633	78.791	8.128	76.953	74.406	3.306	1.339	0.556	0.974	1.828
21349	Tal1	120.196	208.544	182.21	106.818	211.286	235.088	86.565	38.409	160.504	78.198	17.286	23.295	23.962	103.645	111.343	61.072	59.893	71.698	18.461	37.007	35.625	2.255	2.99	2.02	43.073	34.756	35.577	14.061	17.434	15.172	5.141	10.388	0	0	0	0	0	0	0	0	0	0	0	0	0
21350	Tal2	8.896	19.295	21.993	19.222	42.417	40.482	13.799	0.698	45.84	11.888	0.871	2.796	1.827	5.753	19.501	7.808	3.418	18.279	3.061	0	0	0	0	0	0	0	0	0	0	0	0	0	0	0	0	0	0	0	0	0	0	0	0	0	0
21385	Tbx2	2.513	6.277	5.997	0.358	6.553	7.045	0.768	0	2.829	2.349	0.797	9.472	1.679	6.266	4.005	0	3.245	3.747	3.081	9.838	5.65	1.781	7.28	7.787	2.394	3.809	2.311	6.516	3.763	3.633	9.756	41.982	10.376	9.331	13.839	6.006	20.553	29.65	16.742	16.804	10.083	15.979	8.327	8.737	7.805
21386	Tbx3	17.96	20.859	24.486	5.778	23.647	12.128	3.393	4.866	2.972	0.403	0.744	1.403	1	3.372	1.211	0	0.984	1.164	1.195	6.434	4.428	5.395	4.106	3.77	6.362	3.555	2.157	6.081	8.309	3.391	8.896	50.148	27.626	14.662	19.533	20.708	67.396	53.64	72.939	56.178	18.912	58.132	18.078	19.351	23.899
21405	Hnf1a	29.968	31.584	83.951	38.402	106.189	145.195	53.962	24.912	132.599	12.062	0.51	0.679	5.252	1.944	1.212	30.365	7.65	7.016	17.74	84.501	66.314	27.212	25.87	25.891	245.932	246.843	227.08	258.652	339.241	69.143	338.301	365.942	196.777	248.382	500.445	506.365	608.4	684.083	718.787	1006.58	463.076	436.303	576.3	856.359	752.453
21406	Tcf12	17.647	14.675	16.639	20.58	20.344	12.676	16.999	7.557	4.825	7.658	4.836	7.001	8.18	7.045	9.444	12.479	5.624	4.038	12.765	11.164	7.277	11.416	6.752	5.171	2.957	5.589	6.205	9.049	6.051	6.658	0	15.595	0	2.76	3.894	2.765	1.359	2.286	2.901	0	0.549	0.458	0	0	0
21408	Zfp354a	0	0	0	0	0	0	0	0	0.215	0	0	0	0	0.25	0	0	0	0	0	0.007	0	0	0.301	0.013	0.032	0	0.255	0	0.314	0	0	0	0	0.224	0.037	0	0.202	0	0.026	0	0.02	0.014	0	0	1.144
21410	Hnf1b	12.437	8.746	11.16	13.342	5.318	5.658	8.327	2.667	1.375	0	0.296	0	2.093	1.839	0	2.376	2.719	1.98	2.11	1.91	0	0.231	0	0.667	9.598	13.954	11.172	25.939	25.154	22.842	66.412	59.204	23.163	41.571	37.104	43.087	50.578	53.251	48.682	104.089	25.484	25.807	31.163	28.474	22.811
21412	Tcf21	4.523	5.169	0	0	0	0	0	0	0	0	0	0	0	0	0	0	0	0	5.746	0	0	6.513	5.693	0	0	0	0	11.903	0	0	3.812	17.965	0	0	0	0	10.98	0	0	0	0	0	0	0	0
21413	Tcf4	8.02	3.838	7.94	8.252	4.397	2.094	6.715	1.075	0.824	1.698	1.126	1.82	2.342	0	2.176	6.813	1.377	0	5.771	3.408	0	5.554	1.174	1.185	0	0	0	0.845	0	0	0	13.157	0	2.586	2.845	2.336	4.32	4.19	2.028	0	0.442	0.368	0	0	0
21414	Tcf7	11.344	15.042	13.736	7.452	9.299	10.446	6.947	16.134	9.84	7.289	12.094	10.736	11.938	23.804	20.986	15.766	10.508	11.921	17.046	69.181	58.997	5.037	92.253	73.086	12.521	12.038	10.823	18.501	19.668	19.936	28.937	17.149	0	0	165.288	14.752	13.912	13.972	194.281	20.218	44.469	20.728	11.144	11.799	11.599
21415	Tcf7l1	17.248	9.371	9.634	8.627	6.102	6.382	7.884	16.179	5.446	8.751	12.98	12.168	15.323	17.62	15.271	28.101	13.391	12.645	19.37	18.316	16.318	3.53	14.411	8.579	6.93	6.663	5.99	10.239	10.885	11.033	20.422	24.394	0	0	8.273	8.164	7.7	7.733	7.268	10.264	6.675	5.372	6.168	6.53	6.42
21416	Tcf7l2	8.74	19.448	27.11	5.152	10.81	13.782	4.803	11.154	11.909	5.039	8.194	7.422	8.253	23.15	15.53	10.9	12.995	14.506	11.785	56.002	42.803	11.756	72.674	58.843	12.21	18.647	18.052	30.602	30.806	35.089	29.622	15.412	5.274	4.555	23.936	24.276	13.679	25.245	25.537	29.753	44.408	29.257	19.665	11.24	24.537
21417	Zeb1	0.755	1.41	0.795	0.859	2.162	2.847	0.718	1.095	3.373	1.637	0.769	1.109	2.134	4.494	3.813	2.825	3.045	1.457	1.614	0.315	0	1.439	0.413	0.439	0	0	0.241	2.114	0	6.183	1.164	0.4	12.72	0.269	7.241	0.315	0.314	4.804	0	0.445	0	1.113	0	0.219	4.852
21422	Tfcp2	12.086	165.871	142.082	3.475	10.562	15.179	2.04	0	2.425	2.363	0	0	0	0	0.191	1.813	3.668	2.875	0	2.334	0	0.04	0	0	0.186	0	0	0	0	0	0.875	0	78.824	282.499	143.994	57.874	55.488	131.244	73.709	101.448	63.872	37.064	7.27	29.939	38.2
21423	Tcf3	55.886	131.282	99.865	22.468	53.378	67.805	25.049	10.116	48.072	16.224	11.194	14.067	13.031	43.842	43.97	22.559	39.047	28.63	11.677	6.176	30.041	28.584	23.548	21.641	15.584	11.765	15.503	0	11.795	15.987	16.129	12.57	0	4.187	0	0	0	0	3.59	0	0.473	0.395	0	0	0
21425	Tfeb	36.987	52.246	35.594	8.674	12.258	15.484	8.388	24.847	7.377	0	15.763	18.584	5.716	16.201	18.954	5.291	15.362	18.057	1.378	7.22	7.255	50.029	16.132	14.823	16.058	15.95	22.334	24.601	34.478	32.033	159.83	62.264	43.144	79.319	63.593	47.404	82.716	54.856	50.876	90.517	19.713	53.952	30.792	43.101	22.873
21426	Tfec	7.904	18.701	7.673	3.971	5.526	7.253	0	3.212	3.309	0	2.854	0	0	3.991	6.241	3.03	4.179	4.568	2.106	0	3.735	23.614	10.802	4.973	11.526	13.308	13.868	9.67	23.934	10.715	32.387	0	17.501	24.528	20.337	12.329	21.054	24.376	22.466	35.496	17.217	17.054	19.684	27.082	19.464
21428	Mlx	17.232	87.043	51.924	49.607	155.258	138.931	111.991	109.549	145.986	132.009	129.986	108.454	106.535	198.111	226.212	267.872	218.152	225.893	165.773	261.993	257.009	226.671	206.303	207.731	352.466	403.49	389.535	531.011	416.445	614.942	450.746	333.962	2275.37	1136.46	817.979	909.015	1777.8	1640.18	1557.16	1663.78	1927.39	1951.97	3260.56	2893.09	2942.82
21429	Ubtf	2660.84	2556.32	2228.91	2488.13	1442.27	1683.26	2884.49	2871.03	1439.55	1091.16	860.668	457.328	1054.45	1273.5	1163.49	1417.51	435.27	565.06	1339.09	730.402	778.465	1630.64	983.159	877.984	479.768	454.449	474.034	698.541	671.724	617.077	730.459	1139.84	317.988	547.832	499.704	645.635	850.728	740.715	670.449	1180.79	328.109	320.386	385.536	349.563	363.711
21676	Tead1	22.461	26.964	51.442	10.152	18.339	16.269	7.223	26.746	1.305	7.474	5.88	5.503	6.808	8.668	7.868	12.913	8.216	10.566	18.024	10.819	9.914	12.717	15.955	13.676	10.466	18.516	17.673	30.961	34.918	33.54	51.988	33.361	13.772	15.456	48.713	24.307	26.698	18.907	22.14	27.792	8.77	10.416	14.76	13.188	13.977
21677	Tead2	17.249	15.117	12.284	8.368	8.547	9.507	7.022	7.955	1.489	8.526	6.707	6.277	7.765	9.887	8.975	14.73	9.372	12.052	20.559	12.34	11.308	14.506	18.199	15.05	0	11.683	10.767	21.786	23.635	22.198	32.499	28.099	15.71	17.629	20.136	21.68	21.442	20.239	17.182	0	8.169	7.707	13.913	15.043	13.152
21678	Tead3	37.105	54.319	49.284	14.582	10.283	22.222	13.126	11.079	1.137	6.51	7.329	7.749	9.507	7.55	11.522	11.248	15.621	17.873	15.699	12.785	12.619	11.77	19.386	16.824	14.836	25.635	22.764	65.101	78.057	77.053	57.732	49.841	50.204	66.566	65.819	68.857	59.213	84.729	59.436	43.092	47.932	29.498	76.656	53.494	53.636
21679	Tead4	4.388	1.367	2.846	1.228	0	0	0.64	1.175	0	1.861	0.844	0.999	1.397	2.684	2.421	2.23	0	2.573	3.097	3.069	1.156	3.781	4.202	3.499	0	0	0	0	0	0	11.626	9.634	0	0	0	3.671	0	0	0	0	4.757	4.612	0	0	0
21749	Terf1	0.883	1.562	2.84	0	1.122	0	0.757	1.471	1.223	0	0	0	0	0	0	0	0.572	0	0	0	0.688	0.865	0.896	0.621	0.729	0.623	0	0	0	0.711	0	8.195	0	0	0	0	0	0	0	0	0	0	0	0	0
21750	Terf2	5.862	15.7	17.291	13.455	5.563	10.507	14.995	12.796	6.605	1.265	8.885	14.713	9.567	1.444	10.344	1.416	2.077	1.786	6.642	5.409	7.859	4.365	8.577	5.336	6.649	4.75	2.916	5.705	3.992	3.834	0.47	10.819	2.515	3.627	4.269	5.59	3.159	5.078	2.229	18.089	0	0	0	0	0
21780	Tfam	5732.47	3062.49	2751.4	2633.7	1577.8	1889.47	1560.37	1007.17	1080.41	1177.04	1082.66	1480.78	1323.75	2294.01	2039.32	2582.81	2853.49	3474.93	3838.59	5028.33	5270.95	9374.39	6408.49	5288.24	6996.6	7579.07	7850.45	12342.1	10893.2	10680.3	12683.5	9632.98	28327.1	21206	17413	18206.2	21406.2	21538.3	21533.3	16128.1	28956.3	30890.8	26001.9	26853.8	26513
21781	Tfdp1	39.562	78.202	63.039	44.205	52.708	52.581	52.543	91.606	32.617	24.621	30.274	34.79	22.827	46.803	37.754	44.454	32.465	36.743	17.316	25.903	21.233	15.388	12.063	14.546	13.47	14.684	19.724	26.117	33.197	28.411	18.161	45.924	29.514	22.595	12.495	11.767	11.008	0	12.208	2.945	5.44	10.018	0	0	8.057
21807	Tsc22d1	0	0	0	0	0	0	0	0	0	0	0	0	0	0	0.297	0	0	0	0	0	0	0	0	1.398	0	0	0	0	0	0	0	0	0	0	0	0	0	0	0	0	0	0	0	0	0
21815	Tgif1	2.294	2.267	2.838	0.818	5.51	1.664	0.95	1.289	1.433	0.928	0.56	0.4	0.705	0	0	1.056	2.332	1.597	1.444	4.906	5.069	0.531	2.8	5.632	3.025	0	1.984	1.768	2.405	2.197	0.591	0.834	1.108	0.764	1.04	0	1.131	1.496	1.345	0.969	1.007	0.878	2.044	2.123	1.586
21833	Thra	6.993	10.962	9.292	5.813	8.026	10.092	1.361	23.782	7.547	1.968	2.725	3.953	4.777	5.291	9.987	0	4.459	8.238	0	2.78	2.366	0	2.735	2.47	0	0	0	0	0	0	0	3.907	0	8.114	7.816	0	9.96	7.971	8.94	11.864	6.953	6.196	6.494	6.629	6.339
21834	Thrb	0	6.749	5.593	0	5.091	5.709	0	0	5.073	0	0	0	0	5.402	4.401	0	3.696	4.158	0	2.838	2.415	0	2.792	2.521	0	0	0	0	0	0	5.788	1.963	6.163	61.852	71.621	4.68	13.032	43.812	13.862	21.395	13.194	11.382	9.625	6.768	10.094
21847	Klf10	0	0	0	0	0	0	0	0	0	0	0	0	0	0	0	0	0	0	0	0	0	0	0	0.765	0	0	0	0	0	0	0	0	0	0	0	0	0	0	0	0	0	0	0	0	0
22025	Nr2c1	65.185	53.331	37.074	30.563	12.411	16.487	6.558	34.94	0	0	85.389	0	36.742	3.493	1.442	0	2.518	3.225	0	0	0	0	0	0	0	0	0	0	0	0	0	24.526	0	0	0	0	0	4.544	0	30.691	0	0	0	0	0
22026	Nr2c2	295.387	121.373	99.55	139.681	45.364	51.102	72.828	99.79	44.904	3.701	11.569	9.196	17.515	37.733	21.735	3.308	21.346	14.754	0	5.41	6.403	6.211	8.477	7.376	18.516	5.329	6.839	6.487	0	23.258	6.366	12.307	60.156	19.862	29.517	21.604	37.119	66.497	33.932	88.064	69.649	48.739	22.218	37.851	41.852
22059	Trp53	0.891	0	0	3.603	15.882	0	3.105	2.194	12.16	0	2.218	0.614	0	0	0	0	0	0	0	0	0	0	0	0	0	0	0	0	0	0	0	0	0	0	0	0	0	0	0	1.223	0	0	0	0	0
22130	Ttf1	0.345	0.583	1.458	0	2.111	2.953	0.167	0	0	0	0	0	0	0	0	0	0	0	0	0	0	0	0	0	0	0	0.205	0	0	0	0	0	7.903	0.45	2.094	0.563	3.72	2.647	2.521	33.637	1.183	5.636	8.256	3.049	9.541
22160	Twist1	1.308	6.449	3.48	0	0	0	0	0	0	0	0	0	0	0	0	0	0	0	0	0	0	0	0	0	0	0	0	0	0	0	0	0	0	0	0	0	0	0	0	0	0	0	0	0	0
22221	Ubp1	106.353	676.101	584.453	20.051	89.025	98.921	8.455	0	20.67	11.752	1.674	0	6.974	2.735	16.403	2.312	25.376	23.91	0	2.841	0.644	1.512	0	21.119	6.565	1.66	7.01	17.204	26.089	25.679	6.896	38.239	343.694	260.127	371.755	374.83	324.693	289.721	298.709	455.249	315.377	297.319	256.949	283.065	247.39
22255	Uncx	0	0	0	0	0	0	0	0	0	0	0	0	0	0	0	0	0	0	0	0	0	0	0	0	0	0	0	0	0	0	0.657	0.388	0	0	0	0	0	0	0	0	0	0	0	0	0
22259	Nr1h3	0.224	0.359	0	0.493	0.404	0	0.381	0	0	0	0	0	0	0	0	0	0	0	0	0	0	0	0	0	0	0	0	1.222	1.623	0	1.933	0	417.56	122.063	7.438	16.648	99.317	78.196	8.477	68.915	9.065	13.66	295.771	12.075	478.796
22260	Nr1h2	1.019	1.153	0	2.826	0.422	0	1.885	3.258	0	0	0	0	0	0	0	0	0.296	0	0	0	0	0	0	0.35	0	0	0	1.71	1.697	0.522	2.021	0.51	5.388	8.477	6.579	18.044	3.454	4.387	8.352	77.508	22.826	23.16	8.304	12.624	10.468
22278	Usf1	520.192	443.491	475.652	325.136	126.635	280.168	312.127	153.066	213.497	135.77	102.099	203.139	199.254	198.519	111.256	271.585	91.254	100.595	293.919	34.487	66.904	205.457	163.383	140.379	7.861	20.006	10.196	24.292	13.944	31.886	405.583	264.974	89.765	127.599	126.921	125.373	151.425	173.96	116.836	473.261	186.458	177.06	117.422	116.444	151.081
22282	Usf2	271.263	199.206	195.968	230.429	88.835	108.091	205.949	198.165	85.485	82.96	118.493	132.484	135.225	62.837	47.731	207.365	39.101	35.796	125.467	10.647	11.68	170.6	30.565	21.093	6.177	4.911	4.41	5.459	6.639	6.308	99.899	94.18	10.505	30.864	44.538	42.837	74.379	72.942	74.818	149.326	21.905	7.409	35.507	39.425	40.602
22344	Vezf1	64.474	111.851	67.452	20.571	56.368	61.679	24.332	27.814	48.2	0	10.155	1.993	5.889	29.887	38.067	12.922	29.509	18.469	19.22	12.618	14.261	7.799	24.879	27.945	32.351	17.7	29.465	33.411	37.521	37.94	28.165	48.909	28.973	61.749	78.062	49.192	65.513	52.446	77.125	24.226	57.129	59.158	39.777	43.124	45.719
22404	Wiz	88.434	139.066	134.01	29.763	23.476	20.225	10.549	9.252	2.648	0	0.375	0.491	2.627	0.307	0	0	0.586	0	0.722	0.363	0.395	1.169	0	0	3.813	3.391	3.046	2.24	4.394	6.752	4.361	10.245	3.029	10.099	13.417	10.691	19.888	31.461	19.176	23.669	1.122	5.456	20.734	10.58	5.017
22431	Wt1	0	1.736	1.459	0	0	0	0	0	0	0	0	0	0	0	0	0	0	0	0	0	0	0	0	0	0	0	0	0	0	0	0	0	0	0	0	0	0	0	0	0	0	0	0	0	0
22433	Xbp1	5.851	2.279	2.049	12.113	0	0	0.966	5.431	0	0	2.133	0	0	0	0	1.683	0	0	1.457	0	0	2.525	0	0	0	4.698	1.46	0	0	1.754	1.408	0	5.033	0	0	0	19.446	13.801	18.99	29.354	27.837	20.666	3.723	12.727	3.58
22590	Xpa	0	0	0	0	0.255	0.241	0	1.793	0	0	0	0	0	0	3.153	0	0	0	0	0	0	2.068	3.875	0	4.126	0	0	0	0	0	3.93	12.492	9.014	0	0	0	0	0	0	8.584	0	6.993	6.596	0	0
22601	Yap1	0	0	2.637	0	0	0	0	0	0	0	0	0	0	0	0	0	0	0	0	0	0	0	0	0	0	0	0	0	0	0	0	0.75	0	0	0	0	0	0	0	0	0	0	0	0	0
22608	Ybx1	1387.15	2140.26	2193.12	1119.37	2006.92	2633.07	430.257	1255.08	1452.07	298.099	1003.16	291.904	702.11	980.822	638.814	360.854	496.897	1117.05	599.497	1127.62	632.947	682.183	1320.37	1199.25	2140.33	2493.12	2402.54	2650.21	2651.25	2393.3	1081.29	2581.22	1167.57	4467.54	2826.75	3550.98	629.704	597.393	612.395	1241.09	863.291	884.102	1476.31	1064.61	1445.44
22632	Yy1	142.896	611.956	477.507	251.797	767.027	1024.88	346.206	131.557	583.382	291.262	70.712	50.557	94.228	327.346	432.575	442.17	178.752	215.024	160.893	91.294	26.07	77.769	140.125	124.053	382.03	364.138	320.606	346.726	373.13	401.47	206.347	249.024	895.694	589.144	780.786	702.49	663.74	695.547	678.801	723.416	818.441	712.372	721.995	693.867	650.924
22640	Zfp1	2.375	0	0	1.932	0.787	0	0.365	0.043	0	0	0	0	0	0	0.502	0	0	0.289	0	0	0	0	0	0	0	0	0	0	0	0	0	0	0	0	0	0	0	0	0	0	0	0	0	0	0
22642	Zbtb17	0.188	0.538	0.14	0	7.756	52.375	0	0	53.18	0	0	0	0	0	0	0	0	0	0	0	0	0	0	13.004	0	0	0	0	0	0	0.092	0	0.354	0.303	0.302	0	1.171	0.533	0.519	0.201	0.323	0.387	0	0	0
22643	Zfp101	0	0	0	0	0	0	0.128	1.183	0	0	0.473	0.173	0.536	0	0	0	0	0	0	0	0	0	0	0	0	0	0	0	0	0	0	0	0	0	0	0	0	0	0	0	0	0	0	0	0
22661	Zfp148	83.797	174.22	148.501	46.045	44.861	50.209	19.106	16.865	12.058	4.413	6.356	3.971	4.449	12.803	11.607	17.977	12.236	11.371	20.65	19.439	12.695	21.974	32.214	25.98	79.443	74.886	73.005	99.823	111.412	101.809	77.546	60.54	156.751	264.67	303.264	266.983	248.667	218.401	231.847	258.121	178.005	149.501	144.926	159.998	117.345
22666	Zbtb14	0	0	0	0.548	0	0	1.477	0	10.215	2.337	0	0	0	1.834	0	6.896	0	0	5.298	0	1.049	0	2.034	5.959	1.139	0	0	0	0	19.283	0	0	0	0	0	0	0	0	1.774	0	0	0	0	0	0
22678	Zfp2	0	0	0	0	0	0.004	0	0	0	0	0	0	0	0.008	0	0	0	0.045	0	0	0.051	0	0.013	0.024	0	0	0	0	0	0	0	0	0	0.108	0	0	0	0	0	0.23	0	0	0	0	0
22680	Zfp207	0.954	15.113	17.987	3.667	11.859	14.491	4.24	0	6.854	0	0	0	0	1.87	0	0	0	0	0	2.614	2.828	0.107	2.857	2.696	2.59	0	9.092	4.373	0	4.906	1.79	3.179	3.688	6.699	12.18	19.983	12.219	21.295	17.991	20.662	1.87	2.254	7.208	0	0
22689	Zfp27	0	0	0	0	0	0	0	0	0	0	0	0	0	0.01	0	0	0	0	0	0.003	0	0	0	0.007	0.016	0	0.011	0	0	0	0	0	0	0	0.019	0	0.01	0	0.013	0	0.01	0.007	0	0	0
22690	Zfp28	0	0	0	0	0	0.002	0	0	0	0	0	0	0	0.004	0	0	0	0.022	0	0	0.025	0	0.007	0.012	0	0	0	0	0	0	0	0	0	0.054	0	0	0	0	0	0.115	0	0	0	0	0
22691	Zscan2	0	0	0	0	0	0.004	0	0	0	0	0	0	0	0.025	0	0	0	0.039	0	0.006	0.044	0	0.012	0.033	0.029	0	0.02	0	0	0	0	0	0	0.093	0.035	0	0.018	0	0.025	0.198	0.018	0.013	0	0	0
22694	Zfp35	0	0	0	0	0	0.004	0	0	0	0	0	0	0	0.007	0	0	0	0.037	0	0	0.042	0	0.011	0.02	0	0	0	0	0	0	0	0	0	0.09	0	0	0	0	0	0.192	0	0	0	0	0
22696	Zfp37	0	0	0	0	0	0.003	0	0	0	0	0	0	0	0.006	0	0	0	0.034	0	0	0.038	0	0.01	0.018	0	0	0	0.308	0	0	0	0	0	0.082	0	0	0	0	0	0.174	0	0	0	0	0
22697	Zscan21	0	0	0	0	0	1.13	0	0	0	0	0	0	0	0	0	0	0	0	0	0	0	0	0	0	1.078	0	1.211	0	1.424	1.574	0	0	0	0	0	0	0	0	0	0	0	0	0	0	0
22700	Zfp40	0	0	0	0	0	0.004	0	0	0	0	0	0	0	0.007	0	0	0	0.041	0	0	0.047	0	0.012	0.022	0	0	0	0	0	0	0	0	0	0.1	0	0	0	0	0	0.213	0	0	0	0	0
22701	Zfp41	0	0	0	0	0	0	0	0	0.727	0	0	0	0	0.78	0	0	0	0	0	0	0	0	1.015	0	0	0	0.788	0	1.058	0	0	0	0	0.755	0	0	0.616	0	0	0	0	0	0	0	0
22702	Zfp42	10.759	0	0.17	38.91	0	87.374	25.64	0	0	53.475	0	38.029	59.85	44.167	46.082	100.829	0	48.989	42.1	32.956	30.958	38.629	0	0	52.801	42.587	39.864	54.266	58.573	57.584	49.553	0	65.261	48.58	60.14	54.417	53.007	46.838	51.022	128.722	57.14	55.693	47.992	54.887	51.327
22709	Zfp51	0	0	0	0	0	0.003	0	0	0	0	0	0	0	0.006	0	0	0	0.031	0	0	0.035	0	0.009	0.017	0	0	0	0	0	0	0	0	0	0.075	0	0	0	0	0	0.16	0	0	0	0	0
22710	Zfp52	0	0	0	0	0	0.004	0	0	0	0	0	0	0	0.008	0	0	0	0.043	0	0	0.049	0	0.013	0.023	0	0	0	0	0	0	0	0	0	0.104	0	0	0	0	0	0.221	0	0	0	0	0
22712	Zfp54	0	0	0	0	0	0.005	0	0	0	0	0	0	0	0.009	0	0	0	0.049	0	0	0.055	0	0.015	0.026	0	0	0	0	0	0	0	0	0	0.118	0	0	0	0	0	0.25	0	0	0	0	0
22718	Zfp60	0	0	0	0	0	0	0	0	0	0	0	0	0	0	0	0	0	0	0	0	0	0	0	0	0	0	0	0.407	0	0	0	0	0	0	0	0	0	0	0	0	0	0	0	0	0
22720	Zfp62	0	0	0	2.948	0	0.291	2.891	1.533	0	2.076	0.214	1.116	5.632	0.005	1.926	3.545	1.253	1.978	0	0.886	0.029	2.428	0.008	0.269	0	0	0	0.457	0	0	2.019	1.148	0	0.063	0	0	0	0	0	0.134	0	0	0	0	0
22724	Zbtb7b	0	0	0	0	0	0.597	0	0	1.571	0	2.461	0	1.117	2.495	2.226	0	0	0	0	3.417	2.023	4.424	8.39	4.861	2.913	10.388	6.597	8.251	3.556	4.724	3.273	2.099	54.822	34.888	32.029	32.695	78.646	81.938	87.175	92.728	36.039	43.194	40.363	47	45.289
22750	Zfp9	0	0	0	0	0	0	0	0	0	0	0	0	0	0	0	0	0	0	0	0	0	0	0	0	0	0	0	0	0	0.659	0	0	0	0	0	0	0	0	0	0	0	0	0	0	0
22751	Zfp90	0	0	0	0	0	0	0	0	0	0	0	0	0	0.016	0	0	0	0	0	0.005	0	0	0	0.011	0.026	0	0.018	0	0	0	0	0	0	0	0.03	0	0.016	0	0.022	0	0.016	0.012	0	0	0
22754	Zfp92	0	0	0	0	0	0	0	0	0	0	0	0	0	0	0	0	0	0	0	0	0	0.581	0	0	0	0	0	0	0	0	0	0	0	0	0	0	0	0	0	0	0	0	0	0	0
22755	Zfp93	0	0	0	0	0	0.003	0	0	0.182	0	0	0	0	0.217	0	0	0	0.035	0	0.006	0.039	0	0.264	0.03	0.027	0	0.215	0	0.265	0	0	0	0	0.273	0.031	0	0.171	0	0.022	0.18	0.017	0.012	0	0	0
22756	Zfp94	0	0	0	0	0	0.004	0	0	0	0	0	0	0	0.007	0	0	0	0.04	0	0	0.045	0	0.012	0.022	0	0	0	0	0	0	0	0	0	0.097	0	0	0	0	0	0.205	0	0	0	0	0
22757	Zkscan5	3.461	1.075	3.421	1.865	2.207	1.612	1.307	0	0.828	0.522	0	0	0	0.822	0.647	1.188	0.741	1.113	1.392	0.891	0.919	1.557	2.409	1.734	2.722	2.869	2.96	6.159	6.606	7.468	4.082	0	7.132	10.035	8.737	8.346	8.284	8.354	8.407	6.028	6.636	6.235	5.881	6.195	6.434
22759	Zfp97	0	0	0	0	0	0.004	0	0	0	0	0	0	0	0.007	0	0	0	0.04	0	0	0.045	0	0.012	0.022	0	0	0	0	0	0	0	0	0	0.097	0	0	0	0	0	0.205	0	0	0	0	0
22761	Zfpm1	14.094	26.442	18.554	2.062	17.949	19.596	4.35	8.175	6.016	1.015	0.111	0.18	1.123	1.556	1.837	0	0	0	0	2.819	1.463	0	0	0	0	0.098	0.949	2.935	3.12	2.891	3.289	0.764	9.887	4.834	3.365	3.141	4.304	9.408	9.292	17.894	10.328	10.894	7.154	26.177	20.287
22764	Zfx	31.033	24.397	18.667	21.956	11.912	13.503	10.083	2.473	4.589	2.98	0	0	0	3.711	3.597	6.247	2.359	2.145	5.802	3.054	2.638	12.913	4.914	7.638	21.108	18.978	18.06	18.684	18.589	18.035	11.438	10.997	25.315	51.413	47.811	43.222	45.339	49.665	50.3	22.584	40.035	34.629	21.994	22.062	24.922
22767	Zfy1	9.497	5.081	4.146	8.909	3.304	3.912	5.306	0	1.872	2.409	0	0	0	1.822	1.774	5.077	1.439	1.492	4.704	2.337	1.978	9.064	2.722	5.049	6.933	6.463	6.355	6.569	1.858	4.276	1.941	0	6.971	14.922	7.283	8.291	7.562	8.323	8.072	1.641	9.406	5.344	2.072	4.673	5.628
22768	Zfy2	10.025	5.081	4.45	9.436	3.304	3.912	5.648	0	1.872	2.691	0	0	0	2.053	1.774	5.424	1.622	1.681	5.24	2.476	2.229	9.696	3.023	5.303	7.253	6.775	6.677	6.735	2.094	4.818	2.187	0	6.971	15.724	7.849	8.863	8.2	8.323	8.735	1.849	9.873	5.801	2.072	4.673	5.686
22770	Zhx1	0.268	0	1.132	0.334	3.362	1.939	1.887	2.921	1.251	2.069	2.522	4.355	6.799	2.239	3.156	2.097	0.32	2.204	2.32	3.072	4.351	3.673	0	1.459	0	0	0	4.1	4.924	0	0.554	20.217	9.373	11.048	6.523	2.832	15.92	16.803	10.528	37.221	16.058	19.874	7.796	8.139	3.37
22776	Zim1	0	0	0	0	2.069	4.404	0	0	6.562	0	0	0	0	5.671	4.665	0	0	0.047	0	0	0.053	0	0.014	0.025	3.769	0	0	1.054	1.888	1.496	0	0	0	0.113	0	0	0	0	0	0.24	0	0	0	0	0
22778	Ikzf1	43.586	44.017	43.186	9.092	28.42	30.863	13.584	7.747	19.612	9.696	7.075	8.901	9.76	13.193	8.309	1.766	9.844	6.843	7.867	5.756	5.416	4.732	5.304	7.831	13.486	10.719	12.668	2.875	13.776	10.902	0	10.866	5.588	5.338	0	3.587	0	1.11	1.124	0	0	0	0	0	0
22779	Ikzf2	3.576	3.211	3.344	2.671	4.59	5.113	4.962	3.907	10.371	10.412	8.085	10.924	9.72	9.268	8.922	0	6.596	7.348	8.448	6.181	4.823	4	5.696	5.371	5.078	3.452	3.793	3.087	3.684	0	0	3.416	0	0	0	0	0	0	0	0	0	0	0	0	0
22780	Ikzf3	2.274	2.523	2.628	2.099	3.606	4.017	3.898	3.07	8.149	8.181	6.352	8.583	7.637	7.282	7.01	0	5.182	5.774	7.688	4.856	3.789	4.663	8.221	6.895	5.978	4.059	4.791	2.425	2.895	0	1.396	4.785	0	0	0	0	0	0	0	0	0	0	0	0	0
22781	Ikzf4	2.122	2.355	2.453	1.959	3.366	3.749	3.638	2.865	7.606	7.635	5.929	8.011	7.128	6.797	6.543	0	4.837	5.389	6.195	4.533	3.537	2.933	4.177	3.938	3.724	2.531	2.782	2.264	2.702	0	0	2.505	0	0	0	0	0	0	0	0	0	0	0	0	0
22791	Dnajc2	0.18	6.324	7.194	2.627	13.487	3.647	9.967	11.074	26.32	5.478	7.008	9.001	6.14	7.736	22.565	12.068	3.193	10.967	0	4.651	5.72	1.894	6.021	5.225	12.446	10.157	3.823	6.649	11.425	4.111	0	4.261	0	2.439	2.56	3.131	0	2.428	0	0	1.393	1.176	0	0	0
23849	Klf6	5.674	0	2.485	6.704	0	0	3.215	3.224	0	0	0	0	0.843	0	2.545	1.397	0	0	0	0	0.995	4.961	1.263	1.064	1.913	0	1.766	1.401	0	0	0	1.505	0	0	0	0	0	0	0	0	0	0	0	0	0
23871	Ets1	2.59	0	0	0	12.023	0	0	0	0	0	0	8.827	16.597	0	0	0	0	14.711	0	0.727	0.732	0	1.896	62.351	0.352	15.543	0.458	52.639	2.213	0.616	3.844	58.104	0.809	0	2.263	1.903	15.544	2.724	1.922	8.473	1.306	2.967	0	0	0
23872	Ets2	0	0	0	0	0	0	1.436	4.653	19.204	0	3.238	0	0	0	0	0	11.722	12.575	0	15.779	13.558	0	22.967	19.136	0.32	0	0.416	0	79.023	67.942	0	0	0	0	0	0	0	0	0	0	0	0	0	0	0
23877	Fiz1	0.529	0	0	0	0.701	0.678	0.666	2.556	0	0.43	0.163	0.491	0.518	0	0	0	0	0	0	0	0	0.334	0.533	0	0	0.653	0	0	0	0	0	3.439	0	0.58	0	0	0	0	0	0	0	0	0	0	0
23942	Mta2	13.294	39.187	32.41	5.428	22.245	22.998	8.111	18.866	7.764	10.477	11.101	19.249	22.386	9.181	6.504	29.923	9.662	12.529	30.919	9.983	20.623	9.055	13.157	9.246	27.429	12.823	13.607	20.78	14.009	28.306	16.982	35.302	33.906	18.245	30.546	37.366	33.015	54.54	48.533	46.433	30.175	42.884	16.047	20.282	18.178
23957	Nr0b2	0	0	0	0	0	0	0	0	0	0	0	0	0	0	0	0	0	0	0	0	0	0	0	0	0	0	0	0	0	0	0	0	7.095	0	0	0	3.087	0	3.525	6.358	6.639	0	0	0	0
24132	Zfp53	0	0	0	0	0	0.004	0	0	0.224	0	0	0	0	0.248	0	0	0	0.043	0	0	0.049	0	0.325	0.023	0	0	0.242	0	0.326	0	0	0	0	0.336	0	0	0.189	0	0	0.221	0	0	0	0	0
24136	Zeb2	11.203	37.546	4.897	2.546	8.145	7.936	4.176	0.517	8.25	3.661	0.673	0.97	3.333	4.663	6.85	5.568	6.015	1.811	1.412	1.724	1.313	2.777	2.008	3.009	2.968	6.234	3.341	6.207	8.372	14.846	5.008	17.324	13.062	3.11	9.925	0.529	6.13	7.192	3.316	3.71	1.984	2.702	2.222	3.924	9.084
26379	Esrra	161.087	92.898	65.688	144.132	53.285	67.613	61.411	93.718	31.213	28.947	38.204	16.64	45.783	41.992	44.852	34.761	53.617	62.826	40.725	24.704	25.198	42.676	99.343	76.667	127.648	72.604	73.915	118.021	97.612	89.689	356.392	238.134	638.73	657.946	672.492	536.984	736.882	704.848	783.663	1286.94	665.081	618.978	551.117	695.446	575.509
26380	Esrrb	5.64	0	0.214	3.074	0	0.182	3.092	5.328	0	1.456	1.718	1.16	3.028	1.463	1.265	3.92	1.54	0	2.677	0	0	2.033	2.317	2.9	0	0	0	1.798	1.968	0	19.536	17.254	1.953	13.217	15.848	14.961	11.439	9.044	22.371	57.521	19.548	19.814	2.645	0	0
26381	Esrrg	0.736	0	0	0	0	0	0	0	0	0	0	0	0	0	0	0	0	0	0	0	0	0	0	0	2.256	0	2.599	10.294	6.203	3.788	70.526	118.394	4.791	222.221	95.937	102.301	151.683	152.76	186.888	13.03	5.772	5.718	2.186	3.83	0
26424	Nr5a2	13.928	0	2.645	1.623	0	0	0	0	0	0	0	0	0	0	0	0	0	0	0	0	0	0	0	0	0	0	0	0	0	0	0	1.811	10.344	43.383	39.156	31.935	67.697	73.474	69.747	164.319	50.181	35.683	16.929	18.562	35.373
26427	Creb3l1	0.864	0	0	0.62	0	0	0.451	0	0	0	0	0	0	0	0	0	0	0	0	0	0	0	0	0	0	0	0	0	0	0	0	0	0	0	0	0	0	0	0	1.033	0.728	0.645	0	0	0
26465	Zfp146	0	0	0	0.186	0	0	0	0	0	0	0	0	0	0	0	0	0	0	0	0	0	0	0	0	0	0	0	0	0	0	0	0	0	0	0	0.821	0	0	0	0	0	0	0	0	0
26466	Zfp260	1.229	0	0	0	0	0	0.07	0	0.049	0	0	0	0.06	0	0	0.881	0	0	0	0	0	0	0	0	0	0	0	0	0	0	0	0	0	0	0	0	0	0	0	0	0	0	0	0	0
26927	Foxl2	0	5.382	0	0	0	0	0	0	0	0	0	0	0	0	0	0	0	0	0	0	0	0	13.705	0	0	0	0	0	0	0	0	0	13.213	9.364	11.205	11.659	0	0	0	0	10.711	9.667	0	0	0
27049	Etv3	0	1.87	1.797	1.526	1.33	1.542	0	0	0	0	0	0	0	0	0	0	0	0	0	0	0	0	0	0	0	0	0	0	0	0	0	43.036	0	0	0	0	0	0	0	0	0	0	0	0	0
27056	Irf5	0	0	0	0	0	0	0	0	0	0	0	0	0	0	0	0	0	0	0	0	0	0	0	0	0	0	0	0	0	0	0	0.93	0	0	0	0	0	0	0	23.535	1.676	0	0	0	0
27274	Zfp354b	0	0	0	0	0	0	0	0	0.215	0	0	0	0	0.25	0	0	0	0	0	0.007	0	0	0.301	0.013	0.032	0	0.255	0	0.314	0	0	0	0	0.224	0.037	0	0.202	0	0.026	0	0.02	0.014	0	0	1.144
27386	Npas3	0.74	0.874	0.832	0.395	0.275	0.443	0.226	0.855	0.192	0	0.67	0.625	1.084	0	0	0	0	0	0	0	0	0	0	0	0	0	0	0	0	0	0	0.615	0	0	0	0	0	0	0	0	0	0	0	0	0
29808	Mga	29.514	22.236	18.797	8.401	399.715	5.236	6.021	6.651	2.387	2.138	5.033	3.392	3.619	5.014	4.761	0.988	3.377	4.187	1.702	4.446	3.136	3.358	2.674	2.051	4.801	2.843	1.155	2.749	2.004	2.906	3.773	4.914	2.166	1.421	0.889	1.64	2.481	1.977	2.569	4.401	1.267	0.864	0.699	0	0.5
30046	Zfp292	12.433	4.332	3.956	2.854	3.794	2.375	2.313	3.603	1.553	0.756	0.216	0.472	0.85	0.405	0	1.223	0.366	0.695	1.778	0.294	0.223	0.299	0	0.153	0	0.255	0.256	0	0	0	1.595	7.874	0	0.094	0.209	0.136	0	0	0	0	0.241	0.161	0	0	0
30942	Hnf4g	36.41	18.035	19.479	44.538	15.995	17.405	25.882	36.515	16.592	26.48	30.774	30.87	53.57	31.957	28.586	19.809	28.269	27.341	36.362	23.08	20.516	33.904	26.789	24.017	22.479	24.834	24.202	25.583	26.322	24.472	75.618	57.068	217.486	76.592	66.704	78.621	150.266	164.119	145.329	176.72	177.166	150.631	134.617	152.836	120.422
30944	Zfp354c	0	0	0	0	0	0.004	0	0	0	0	0	0	0	0.007	0	0	0	0.039	0	0	0.044	0	0.012	0.021	0	0	0	0	0	0	0	0	0	0.093	0	0	0	0	0	0.198	0	0	0	0	0
50496	E2f6	5.925	25.016	27.15	3.443	12.496	5.797	4.372	2.625	0	1.202	0.1	1.143	0.591	0	0	0	0	0	0	0	0	0	0	0	0	0	0	0	0	0	0	0	0	0	0	0	0	0	0	0	0	0	0	0	0
50524	Sall2	0	0	0	0	0.075	0	0	0	0	0	0	0	0	0	0	0	0	0	0	0	0	0	0	0	0.115	0.133	0.104	0.284	0.301	0.343	0.218	0.324	0	0.653	0.53	0.698	1.004	2.007	1.973	0	0	0	0	0	0
50794	Klf13	39.713	56.555	36.221	67.836	72.234	75.964	50.371	41.158	35.355	82.45	0	0	31.338	46.905	42.103	34.202	20.585	2.231	58.491	18.687	33.155	41.608	77.531	68.203	51.412	28.998	30.714	22.137	51.726	29.518	14.047	49.274	24.89	54.77	46.801	49.373	42.121	69.626	42.432	13.307	20.266	11.501	29.143	0	12.978
50907	Preb	0	0	0.397	0.394	1.617	1.439	4.438	6.192	6.889	8.53	25.71	19.055	51.865	33.379	19.209	272.856	27.818	32.984	102.081	42.862	39.437	9.586	16.903	10.603	7.301	16.839	8.168	24.438	26.109	50.461	17.773	155.083	29.15	31.956	15.239	25.381	6.088	21.794	14.347	37.624	18.486	24.975	43.706	64.48	61.626
52397	Zfp644	381.972	49.226	74.265	1.649	0	0	1.356	1.512	1.158	0.452	0	0	0.5	0	0	0	0	0	0	0	0	0.532	0.366	0	0	0	0	0	0	0	0.376	1.285	0	0	0	4.052	0	11.845	0	0	0	0	0	0	0
52440	Tax1bp1	0	0	0	0	0	0	0	0	0	0	0	0	0	0	0	1.439	0	0	0	0	0	0	0	0	0	0	0	0	0	0	0	0	0	0	0	0	0	0	0	0	0	0	0	0	0
52502	Carhsp1	0	0	0	0	0	0	0	0	0	0	0	0	0	0	0	0	0	0	0	0	0	0	0	0	0	0	0	0	0	0	2.687	0	0	0	0	0	0	0	0	0	0	0	0	0	0
52521	Zfp622	0	0	0	0	0	0	0	0	0	0	0	0	0	0	0	0	0	0	0	0	0	0	0	0	0	0	0	0	0	0	0	0	0	0	0	0	1.304	0	0	0	0	0	0	0	0
52679	E2f7	0	0.092	0.176	0	0.542	0.48	0.127	0.77	0.093	0	0.085	0.094	0.211	0.321	0.153	0	0	0.153	0	0	0	0	0	0	0	0	0	0	0	0	0	0.153	0	0	0	0	0	0	0	0	0	0	0	0	0
52712	Zkscan6	0	0	0	0	0	0.004	0	0	0	0	0	0	0	0.008	0	0	0	0.047	0	0	0.053	0	0.014	0.025	0	0	0	0	0	0	0	0	0	0.113	0	0	0	0	0	0.24	0	0	0	0	0
53314	Batf	3.72	0	0	4.265	0	0	1.982	0	0	0	0	0	0	0	0	0	0	0	0	0	0	0	0	0	0	0	0	0	0	0	0	0	0	0	0	0	0	0	0	0	0	0	0	0	0
53417	Hif3a	0.033	0.089	3.315	1.436	6.301	4.087	5.22	8.786	8.92	32.501	27.317	44.454	38.981	48.903	37.416	42.892	27.186	35.651	26.162	9.823	5.648	0	0	0	0	0	0	0	0	0	0	0	0	0	0	0	0	0	0	0	0	0	0	0	0
53422	Ybx2	289.961	344.88	374.279	315.521	532.444	555.396	156.216	625.443	606.281	81.55	471.1	212.488	309.117	399.228	448.823	275.947	328.548	476.847	212.815	462.966	376.067	244.114	504.622	471.16	509.875	649.293	719.358	807.049	600.264	516.64	323.633	1092.32	291.08	854.186	461.287	594.677	149.966	200.91	156.229	267.72	166.519	158.523	251.672	283.762	216.262
53970	Rfx5	4.585	9.101	5.762	3.404	14.745	11.421	1.199	20.11	1.757	2.464	33.706	8.588	43.427	28.849	19.67	6.25	6.764	3.992	12.167	30.443	1.115	1.603	6.945	20.318	33.726	16.112	13.718	23.029	26.103	25.196	38.415	30.069	30.783	33.915	32.951	68.552	29.313	38.692	39.193	77.371	18.174	20.013	23.036	25.527	12.172
54006	Deaf1	0.585	7.241	12.175	0.865	2.003	2.231	0.075	0.816	0	0	0	0	0	0	0	0	0	0	0	0	0	0	0	0	0	0	0	0	0	0	0	0.856	0	0	0	0	0	0	4.125	5.454	0	0	0	0	0
54131	Irf3	11.35	38.807	39.798	13.401	57.974	68.279	34.325	22.686	72.651	43.552	36.543	21.671	26.004	86.163	78.103	55.475	112.319	114.205	59.068	171.228	175.557	35.795	55.829	75.785	75.431	86.789	77.708	115.968	103.408	133.047	76.357	47.407	390.326	151.799	125.088	187.38	135.538	215.217	185.171	284.456	578.273	495.662	374.382	652.639	554.241
54139	Irf6	0	0	0	0	0	0	0	0	0	0	0	0	0	0	0	0	0	0	0	0	0	0	0	0	0	0	0	0	0	0	0	0.345	0	0	0	0	0	0	0	0.904	0	0	0	0	0
54367	Zfp326	0.236	2.352	1.426	0	0	0	0	0	0	0	0	0	0	0	0	0	0	0	0	0	0	0	1.235	0	0	0	0	0	0	0	0	0	8.94	13.579	13.841	36.102	4.403	8.379	1.041	22.015	12.874	6.942	9.203	0.862	8.814
54380	Smarcal1	1.77	10.953	10.226	15.873	54.914	54.423	39.114	74.945	92.319	22.691	87.245	56.66	111.594	123.682	106.281	38.175	104.532	114.606	33.976	69.595	65.64	31.514	66.705	51.177	45.139	39.053	16.327	9.871	8.637	11.629	22.017	26.513	99.798	3.081	44.781	4.341	10.173	8.121	55.02	34.013	29.704	30.174	114.559	36.987	114.435
54446	Nfat5	1.167	1.462	0.271	2.257	4.31	11.572	3.256	0	12.649	3.005	0.678	6.527	6.961	7.14	7.434	0.432	6.71	5.218	4.052	8.276	7.826	2.099	7.1	6.54	6.164	5.809	5.039	21.069	8.454	25.068	33.075	8.343	14.632	32.113	21.834	28.263	14.771	21.937	12.675	33.502	22.303	13.813	14.185	17.786	27.941
54601	Foxo4	0.898	0	0.582	6.352	7.268	0	7.155	17.809	5.725	4.775	8.714	8.702	14.716	3.849	5.176	6.36	2.963	2.02	15.66	2.779	2.779	0	0	0.534	0	0	0	0	0	0	7.24	4.342	0	0	0	0	0	0	0	15.833	6.476	0	9.577	0	0
54678	Zfp108	0	0	0	0	0	0.003	0	0	0.166	0	0	0	0	0.184	0	0	0	0.032	0	0	0.036	0	0.242	0.017	0	0	0.18	0	0.242	0	0	0	0	0.25	0	0	0.141	0	0	0.164	0	0	0	0	0
54711	Plagl2	0	0	0	0	1.65	0	0	0	0	0	0	0	0	0	0	0	0	0	0	0	0.713	0	0	0	0	0	0	0	0	0	0	0	0	0	0	0	0	0	0	0	0	0	0	0	0
55927	Hes6	0	0	0	0	0	0	0	0	0	0	0	0	0	0	0	0	0	0	0	0	0	0	0	0	0	0	0	0	0	0	0	0	2.601	0	0	0	0	0	0	7.421	4.849	2.834	0	0	1.644
55994	Smad9	0	0.945	0.811	0.324	0.885	0.868	0.333	0	0.729	0.586	0	0	0	0.812	0.679	0.662	0.914	1.065	0	0.222	0.932	0.364	0	0.881	1.31	1.112	1.039	1.326	1.463	1.432	0.867	0	0	1.733	2.103	2.083	1.874	1.67	1.908	1.592	0	1.607	1.69	0	0
56193	Plek	0	0	0	0	0	0	0	0	0	0	0	0	0	0	0	0	0	0	0	0	0	0	0	0	0	0.403	0	0	0	0	0	0	0	0	0	0	0	0	0	0	0	0	0	0	0
56218	Patz1	45.214	59.631	37.265	0.495	42.347	52.259	9.208	10.618	28.769	0	6.082	1.207	6.045	21.882	21.295	9.643	16.82	8.462	13.308	9.238	10.441	4.555	14.847	12.902	23.686	12.959	21.572	9.679	27.47	27.778	12.742	14.708	21.212	32.431	32.86	32.923	31.72	13.916	33.318	2.263	21.784	19.498	21.025	24.234	13.987
56220	Zfp386	0	0	0	0	0	0.004	0	0	0	0	0	0	0	0.024	0	0	0	0.037	0	0.006	0.042	0	0.011	0.032	0.028	0	0.02	0	0	0	0	0	0	0.09	0.033	0	0.018	0	0.024	0.192	0.018	0.013	0	0	0
56380	Arid3b	0	2.707	2.432	0	0.591	1.262	0.258	1.683	0.738	2.634	4.979	3.968	3.387	4.762	4.486	0	1.11	5.59	2.582	0	0.996	0	0.439	0	0	0	0	0	0	0	0.328	0.398	0	0	0	0	0	0	0	0	0	0	0	0	0
56449	Ybx3	653.451	505.885	570.42	755.792	884.585	1167.45	507.125	1019.27	1047.6	138.599	672.501	275.012	402.298	514.889	656.394	394.47	482.096	678.654	308.568	596.72	538.22	368.24	656.701	616.222	815.874	991.127	1076.95	1252.87	762.983	698.393	474.646	1386.5	380.015	1221.18	806.563	901.598	267.178	256.978	273.87	373.756	262.781	212.738	339.669	371.05	275.735
56458	Foxo1	0.291	1.169	0	0.327	136.898	196.826	170.414	10.909	2.595	5.823	11.271	10.469	14.748	303.549	313.889	14.938	305.201	392.649	25.518	19.594	14.175	10.141	378.235	360.221	10.913	0	415.572	568.854	0	569.486	423.251	25.054	0.501	632.053	3481.77	560.977	403.903	3072.93	450.663	86.421	35.385	595.299	0	6.039	680.386
56469	Pias1	1.853	6.496	5.502	1.078	3.744	5.859	2.783	3.421	7.899	1.966	4.73	3.748	7.448	1.588	0.967	0	0.866	7.28	0	1.551	7.216	1.123	5.874	0.496	8.122	2.326	9.223	2.49	31.662	11.742	6.461	10.861	2.016	0	4.221	2.249	12.543	1.889	6.14	23.822	11.971	13.808	4.228	1.393	1.607
56484	Foxo3	5.795	1.591	1.423	11.746	31.528	54.344	24.133	41.125	36.163	19.267	71.479	73.324	71.402	71.781	62.336	39.246	48.16	32.565	23.389	11.525	37.43	0.415	11.903	14.165	0	0	0	0	0	0	1.058	17.935	0	0	0	0	0	0.411	0	0	0	0	0	0	0
56490	Zbtb20	0	0	0	0	0	0	0	0	0	0	0	0	0	0	0	0	0	0	0	0.776	0	0	0	1.338	2.473	1.666	1.973	2.239	6.674	8.785	11.411	36.62	800.908	222.361	232.23	206.311	410.151	446.822	404.083	1476.09	1208.61	1131.38	545.483	479.043	485.245
56501	Elf4	50.657	36.335	30.126	42.652	11.155	14.422	29.336	31.449	31.665	23.878	32.184	39.698	32.547	15.17	13.99	25.884	16.022	8.519	41.674	26.147	21.055	82.688	30.811	25.286	18.401	20.375	12.658	15.133	22.514	21.398	30.244	51.833	5.652	17.386	17.488	15.881	11.319	7.176	14.6	15.63	6.682	7.219	5.381	7.119	6.312
56525	Zfp235	0	0	0	0	0	0.003	0	0	0	0	0	0	0	0.006	0	0	0	0.032	0	0	0.036	0	0.01	0.017	0	0	0	0	0	0	0	0	0	0.077	0	0	0	0	0	0.164	0	0	0	0	0
56707	Zfp111	0	0	0	0	0	0.003	0	0	0.171	0	0	0	0	0.189	0	0	0	0.033	0	0	0.037	0	0.249	0.018	0	0	0.185	0	0.249	0	0	0	0	0.257	0	0	0.145	0	0	0.169	0	0	0	0	0
56711	Plag1	0	0	0	1.117	0	0	0	0	0	0	0	0	0	0	0	0	0	0	0	0	0	0	0	0	0	0	0	0	0	0	0	0	0	0	0	0	0	0	0	0	0	0	0	0	0
56805	Zbtb33	0	0	0	0	0	0	0	0	0	0	0	0	0	0	0	0	0	0	0	0	0	0	0	0	0	0	0	0	0	0	0.444	0	0	0	0	0	0	0	0	15.2	0	0	0	0	0
56809	Gmeb1	0	5.443	16.124	3.125	7.454	6.853	6.428	0	0	2.116	6.852	5.085	0	6.907	0	2.352	4.623	5.658	0	4.397	0	0	2.527	2.238	0	0	0	0	0	0	0	0	0	0	0	0	1.263	0	0	0	3.568	0	0	0	0
56869	Zfp109	0	0	0	2.395	0	0.003	2.012	0	0	0	0	0	0	0.005	0	0	0	0.03	0	0	0.034	0	0.009	0.016	0	0	0	0	0	0	0	0	0	0.073	0	0	0	0	0	0.155	0	0	0	0	0
57080	Gtf2ird1	0	0	0	0	0	0	0	0	0	0	0	0	0	0	0	0	0	0	0	0	0	0	0	0	0	0	0	0	0	0	0	2.315	0	0.868	0	0	0	0	0.892	2.087	0.523	0	0	0	0
57246	Tbx20	0	0	0	0	0	0	30.807	0	0	0	0	0	0	0	40.186	0	0	0	0	0	0	0	0	0	0	47.757	0	81.851	92.145	0	0	0	0	117.534	115.839	0	123.561	0	120.972	0	104.529	0	0	0	185.082
57247	Zfp276	0.272	0.286	0.275	0.162	0.257	0.26	0	0.213	0	0	0	0.105	0.149	0	0.231	0	0	0	0	0.308	0.33	0	0.244	0.325	0.312	0.264	0.306	0	0	2.266	0	0	0	0.696	0.736	3.606	3.483	0.772	3.966	0	2.883	0.44	0.441	0.84	0
57376	Smarce1	18.593	55.519	58.321	12.411	40.014	42.375	28.939	7.59	33.082	10.097	1.543	0.557	7.561	21.084	20.319	7.575	14.891	10.498	5.787	8.693	5.727	14.51	17.557	10.775	50.347	46.279	51.518	92.035	51.822	42.239	53.663	79.559	47.261	69.999	60.986	90.771	99.976	94.35	111.299	133.627	44.036	51.429	53.014	61.689	21.298
57745	Zfp112	0	0	0	0	0	0.002	0	0	0	0	0	0	0	0.004	0	0	0	0.025	0	0	0.028	0	0.007	0.013	0	0	0	0	0	0	0	0	0	0.06	0	0	0	0	0	0.128	0	0	0	0	0
57765	Tbx21	1.014	0	0	0.358	0.972	1.181	0	0	0	0	0	0	0	0	0	0	0	0	0	0	0	0.643	0	0	0	0	0	0	0	0	1.531	0	0	0	3.157	0	4.09	4.269	4.337	2.308	0	3.097	3.021	3.229	3.112
57908	Zfp318	0	0	0	0	0	0	0	0	0	0	0	0	0	0	0	0	0	0	0	0	0	0	0	0	0	0	0	0.428	0	0	0	0	0	0	0	0	0	0.862	0	0.703	0	0	0	0	0
58180	Hic2	30.475	48.816	30.69	2.661	2.322	0	3.189	4.37	1.339	3.327	7.066	3.433	7.431	0	0	0	0	0	0	0	0	0.481	0	0	0	0	0	0	0	0	0	2.622	0	0	0	0	0	0	0	26.879	20.804	0	0	0	0
58198	Sall1	1.989	0.271	0.254	0	0.333	0.32	0.131	0.742	0	0	0	0	0	0	0	0	0	0	0	0	0	2.487	0	0	0.077	0.089	0.069	0.189	0.201	0.228	0.781	5.093	0	1.229	2.849	0.465	5.61	5.053	3.567	36.855	0	0	0	0	0
58805	Mlxipl	2.495	17.207	11.604	10.084	23.079	29.996	13.899	28.11	15.922	13.224	25.001	21.81	23.896	30.275	28.995	32.114	36.71	31.6	20.885	45.66	26.474	30.83	32.328	23.11	60.148	63.468	58.241	70.964	87.22	99.826	131.632	79.774	615.898	153.608	170.628	138.092	389.461	327.845	344.135	662.78	543.327	409.395	590.742	671.664	613.879
58887	Repin1	0	0	0	0	0	0.94	0.887	0	0	0	0	0	0	2.33	2.078	0	5.825	1.446	1.032	3.886	0	0	8.771	5.87	0	0	0	0	0.645	0	2.361	4.049	0	0.74	0	0.666	0	0.302	0.249	0	2.523	1.396	0	0	0
59004	Pias4	4.631	93.531	81.646	9.575	56.146	47.69	11.879	1.254	0	3.003	0	0	0	1.992	2.109	0.425	4.523	4.719	0.67	3.999	3.896	0.631	0	2.213	0.96	2.875	8.593	4.968	8.439	5.133	2.174	1.552	0	5.487	7.391	7.096	3.655	4.155	1.419	11.095	55.897	3.812	1.043	0.614	0.794
59016	Thap11	6.034	12.238	10.781	6.689	14.735	0	9.085	0.782	0	5.524	8.646	8.211	12.916	17.017	17.146	11.423	1.962	0	7.876	0	9.9	6.442	10.333	9.384	12.045	8.837	11.341	8.284	10.681	11.448	7.853	7.53	11.451	13.639	0	25.505	18.231	16.371	20.828	33.8	6.13	12.522	13.562	13.497	18.396
60611	Foxj2	0	1.678	0.114	0	2.282	5.31	0.867	0	3.052	1.2	0	4.341	2.649	7.032	6.452	2.455	49.44	7.27	4.713	5.002	3.389	0	7.552	6.591	25.722	1.854	1.728	0	4.559	2.856	0	4.775	1.327	40.089	0.305	42.228	2.196	0	0.303	4.562	3.626	2.895	2.356	0	0
64050	Yeats4	1.316	9.37	7.949	2.776	8.979	8.73	3.765	1.411	3.165	0	0	6.514	3.373	3.188	1.516	0	1.643	2.761	0	1.865	2.901	1.356	0	0	0	2.658	0	0	0	0	1.047	6.17	0	0	0	4.494	5.602	5.172	5.376	4.397	3.367	0	0	0	3.75
64406	Sp5	0	66.127	55.485	0	33.29	0	0	0	0	0	0	0	0	0	0	0	0	0	0	0	0	0	0	0	0	0	0	0	0	0	0	0	0	0	0	0	0	0	0	0	0	0	0	0	0
64453	Zfp280b	0	0	0	0.293	0	0	0.651	0.173	0	0.317	0	1.287	1.453	0	0	0	0	0	0	0	0	0.126	0	0	0	0	0	0	0	0	0.545	1.063	0	0	0	0	0	0	0	0	0	0	0	0	0
66056	Zfp524	0	0	0	0	0	0	0	0	0	0	0	0	0	0	0	5.202	0	0	0	0	0	0	0	0	0	0	0	0	0	0	0	0	4.329	0	5.379	0.928	8.375	9.093	6.328	1.728	5.045	2.205	3.402	4.57	0
66277	Klf15	0	0	0	0	0	0	0	0	0	0	0	0	0	0	0	0	0	0	0	0	0	0	0	0	0	0	0	0	0	0	0	0	0	0	0	0	0.829	0	0	22.242	0	0.668	0	0	0
66855	Tcf25	0	0	0	0	0	0	0	0	0	0	0	0	0	0	0	0	0	0	0	0	0	0	0	0	0	0.232	0	0	0	0	0	0	0	0	0	0	0	0	0.949	0	0	0.244	0	0.986	0
66867	Hmg20a	127.124	53.385	67.423	64.057	156.607	26.716	12.569	13.766	2.289	3.052	0	0	0	90.279	7.726	5.722	43.529	61.064	4.432	8.275	12.271	4.71	9.444	10.204	82.58	122.794	138.189	165.993	143.259	178.554	217.085	199.314	14.36	395.298	169.376	388.273	96.174	149.099	77.194	73.75	11.27	18.926	24.134	34.636	34.009
66869	Zfp869	0	0	0	0.873	0	0	2.117	0	0	0	0	0	0	0	0	0	0	0	0	0	0	0.612	0	0	0	0	0	0	0	0	0	0	0	0	0	0	0	0	0	0	0	0	0	0	0
66923	Pbrm1	8.588	21.98	24.641	9.363	31.581	32.869	10.061	13.241	13.287	11.701	2.007	5.224	27.819	5.095	10.321	8.762	16.987	8.497	8.863	9.826	14.647	5.146	5.945	8.826	37.429	27.81	24.387	27.622	28.935	28.046	25.195	26.97	8.112	47.288	39.559	58.189	35.96	37.813	30.983	50.848	17.042	13.12	15.705	13.063	10.936
67109	Zfp787	0	0	0.82	0	0	0	0	0	0	4.303	0	1.856	1.387	0	0	11.714	1.334	0	4.758	0	0	0	0	0	0	30.991	0	0	0	0	11.52	32.512	0	0	0	0	0	0	0	13.485	1.676	5.158	0	0	0
67143	Ikzf5	0	34.377	7.651	0	14.49	34.698	0	2.959	0	0	0	0	0	0	0	0	0	0	0	0	0	0	0	0	0	0	0	0	0	0	0	0	0	0	0	0	13.788	0	15.176	0	13.77	0	0	0	0
67210	Gatad1	1	4.064	2.776	0.404	0	0	0.795	8.595	0	0	0	0	0	0	0	0	0	0	0	0	0	0	0	0	0	0	0	0	0	0	0.768	5.516	0	0	0	0	0	0	0	7.652	0	0	0	0	0
67230	Zfp329	0	0	0	0	0	0.004	0	0	0	0	0	0	0	0.007	0	0	0	0.04	0	0	0.045	0	0.012	0.022	0	0	0	0	0	0	0	0	0	0.097	0	0	0	0	0	0.205	0	0	0	0	0
67255	Zfp422	0	0	0.787	0	0	1.299	0	0	0	0	0	0	0	11.182	0	0	1.632	6.476	0	17.595	20.812	7.626	46.787	26.368	4.72	4.155	5.776	14.852	15.527	38.216	7.549	23.687	3.893	8.868	21.032	8.777	2.841	0	3.213	3.982	7.573	1.861	1.772	0	0
67367	Paxbp1	0.246	0.542	0.139	0	0	0	0	0.987	0	0	0	0	0	0	0	0	0	0	0	0	0	0	0	0	0	0	1.001	0.348	0	0	0	0	0.42	1.235	4.099	0.869	1.687	0	2.34	0	0.455	0.547	0.516	0.832	0.77
67370	Zfp606	0	0	0	0	0	0.003	0	0	0	0	0	0	0	0.005	0	0	0	0.029	0	0	0.033	0	0.009	0.016	0	0	0	0	0	0	0	0	0	0.071	0	0	0	0	0	0.151	0	0	0	0	0
68036	Zfp706	0	90.952	170.854	49.88	164.302	201.181	95.519	0	56.231	36.093	0	0	0	55.359	48.104	47.141	15.051	0	0	26.58	0	0	0	0	32.146	28.109	0	40.128	47.485	0	0	0	57.607	39.218	41.487	42.663	43.127	110.574	49.235	71.852	47.398	96.525	45.01	62.95	135.863
68094	Smarcc2	4.693	31.424	43.96	7.229	43.022	41.816	15.194	7.056	32.774	4.332	0.727	1.105	2.377	8.999	13.393	4.603	9.54	3.354	3.717	18.581	12.464	6.077	22.513	16.111	63.001	51.751	34.143	106.141	88.712	98.926	36.044	54.295	136.396	176.689	153.958	153.198	139.418	165.441	162.517	168.548	65.234	74.071	74.434	111.462	74.825
68379	Ciz1	0	0	0	0	0	0	0	0	0	0	0	0	0	0	0	0	0	0	0	0	0	0	0	0	0	0	0	0	0	0	0	0.134	0	0	0	0	0	0	0	0	0	0	0	0	0
68750	Rreb1	32.332	48.278	46.534	13.66	23.431	29.808	12.125	5.82	9.722	12.098	5.09	7.586	4.923	13.962	12.836	20.713	19.228	19.254	19.043	14.254	12.169	14.656	11.203	8.656	15.188	15.301	17.153	29.509	34.315	34.156	49.371	56.034	61.075	83.571	80.468	70.16	74.343	77.632	92.472	65.619	63.691	151.079	35.438	72.558	63.907
68837	Foxk2	14.528	41.294	29.857	25.905	47.61	67.017	40.29	43.938	54.774	31.229	36.511	20.006	34.625	50.038	52.99	51.078	47.116	37.566	39.326	48.907	21.385	16.365	44.568	52.86	17.518	19.649	15.291	28.448	56.263	58.259	9.724	9.585	34.521	23.227	29.349	31.794	47.091	46.98	22.483	0.238	46.223	54.077	22.975	3.193	35.754
69256	Zfp397	0	0	0	0	0	0.003	0	0	0	0	0	0	0	0.006	0	0	0	0.035	0	0	0.039	0	0.01	0.019	0	0	0	0	0	0	0	0	0	0.085	0	0	0	0	0	0.18	0	0	0	0	0
69257	Elf2	64.429	73.565	63.645	75.622	18.909	59.231	84.758	142.998	37.998	34.919	100.687	38.135	84.724	64.903	66.094	43.948	76.629	46.585	50.649	66.428	56.623	64.148	72.746	63.264	41.574	60.674	54.587	85.429	16.961	42.633	88.067	69.408	24.857	107.332	104.523	103.013	96.164	92.336	88.072	155.405	20.994	22.343	23.362	28.054	27.067
69504	Zfp932	0.031	0	0	0	0	0.004	0.045	0	0.032	0	0	0	0.038	0.008	0	0	0	0.045	0	0	0.051	0	0.013	0.024	0	0	0	0	0	0	0	0	0	0.108	0	0	0	0	0	0.23	0	0	0	0	0
69743	Casz1	0	0	0	0	0	0	0.046	0	0	0	0	0	0	0	0	0	0	0	0	0	0	0	0	0	0	0	0	0	0	0	0	0	0	0	0	0	0	0	0	0.489	0	0	0	0	0
69876	Thap3	11.671	11.459	9.342	5.987	0	13.189	5.75	0	0	0	0	0	0	6.129	0	4.68	0	0	0	0	0	0	6.582	4.5	0	10.078	0	8.216	20.206	0	6.347	0	0	8.621	0	7.963	4.933	7.212	7.232	5.818	0	4.217	0	0	0
69890	Zfp219	6.278	6.919	4.348	1.418	5.287	10.53	2.741	3.775	3.155	0.968	0	0	0	1.172	1.099	0.89	2.108	1.633	0.861	0.425	0.341	0.65	0.534	0.444	0	0	2.944	0.392	1.481	0.515	0.366	10.16	3.293	11.235	7.559	6.178	9.555	5.234	16.112	13.362	4.93	3.224	1.51	1.597	1.822
69930	Zfp715	0	0	0	0	0	2.876	0	1.034	0.686	0	0	0.341	2.312	0.266	0	0	0.443	0	0	0	0	0	0.298	0	0	0	0	0	0	3.534	0	0	0	0	0	0	0	0	0	0	0	0	0	0	0
70673	Prdm16	5.63	12.603	0	7.532	0	0	11.329	0	0	0	0.301	0.599	0	0	8.129	0	0	0	0	0	0	0	0	9.821	6.696	6.113	0	0	8.285	0	9.411	0	11.547	0	9.583	13.649	13.557	16.713	10.075	12.727	12.553	17.043	13.199	14.362	0
70823	Hmgxb4	0	0	0	0	0	0	1.458	0	0	2.593	0	0	0	2.777	0	0	0	0	4.029	0.797	0	0	0	0	0	0	0	0	0	0	0	1.759	0	0	0	1.269	0	0	0	1.41	0	0	0	0	0
71063	Zfp597	0	0	0	0	0	0.005	0	0	0	0	0	0	0	0.01	0	0	0	0.053	0	0	0.06	0	0.016	0.029	0	0	0	0	0	0	0	0	0	0.129	0	0	0	0	0	0.274	0	0	0	0	0
71148	Mier1	1.241	0	0	0	0	0	0	0	0	0	0	0	0	0	0	0	0	0	0	0	0	0	0	0	0	0	0	0	0	0	0	0	0	0	0	0	0	0	0	0	0	0	0	0	0
71268	Lrrfip2	0	24.598	8.055	0	210.462	283.599	216.612	47.554	232.857	1.434	3.542	1.874	16.318	303.718	273.897	3.979	441.706	435.783	4.116	295.486	3.443	0.565	248.18	237.018	62.127	43.056	55.705	646.216	799.269	61.746	15.323	38.812	1552.4	170.492	116.604	1150.4	284.44	252.614	278.14	503.532	213.09	1253.36	1253.51	1344.7	1262.8
71371	Arid5b	0.86	0.375	0	0.176	0	0	0.499	0.358	0	0	0.564	0.545	0.423	0	0	1.265	1.769	1.961	1.812	1.799	0.15	2.967	0.762	0	0.539	0.54	0	0	0.655	0	0	1.677	1.492	2.63	1.175	0	2.297	1.321	1.707	14.591	0.256	0	0	0	0
71375	Foxn3	0	3.369	0	2.531	0	2.709	0.032	0	0	0	0	0	0	3.539	3.015	0	2.681	3.212	0	0	2.847	0	2.444	2.107	0	0	0	0	0	0	0	4.542	0	0	0	0	2.197	0	2.122	4.291	3.945	9.685	4.242	0	2.409
71508	Zfp935	0	0	0	0	0	0.007	0	0	0	0	0	0	0	0.013	0	0	0	0.075	0	0	0.084	0	0.022	0.04	0	0	0	0	0	0	0	0	0	0.18	0	0	0	0	0	0.383	0	0	0	0	0
71702	Cdc5l	0.482	19.246	21.476	1.166	4.532	5.748	9.359	6.739	24.792	3.097	7.48	3.418	2.708	20.249	26.189	22.572	4.926	5.529	1.4	24.788	25.397	16.706	47.606	39.409	13.299	21.348	23.378	31.755	15.142	52.984	8.181	10.231	357.255	229.797	252.826	261.742	25.752	257.952	32.289	26.874	213.959	17.688	276.155	260.959	280.168
71722	Cic	0	0	0	0	0	0	0	0	0	0	0	0	0	0	0	0	0.196	0	0	0	0	0	0	0	0	0	0	0	0	0	0	0	0	0.681	0	0	0	0.571	0	0	0	0.202	0	0	0
71834	Zbtb43	0	0	0	0	0	0	0.541	0	0	0	0	0	0	0	0	0	0	0	0	0	0	0	0	0	0	0	0	0	0	0	0	0	0	0	0	0	0.716	1.189	1.036	0	0	0	0	0	0
72033	Tsc22d2	0	0	0	0	0	0	0	0	0	0	0	0	0	0	0.132	0	0	0	0	0	0	0	0	0.622	0	0	0	0	0	0	0	0	0	0	0	0	0	0	0	0	0	0	0	0	0
72180	Zfp661	0	0	0	0	0	0	0	0	0.242	0	0	0	0	0.26	0	0	0	0	0	0	0	0	0.338	0	0	0	0.263	0	0.353	0	0	0	0	0.252	0	0	0.205	0	0	0	0	0	0	0	0
72465	Zfp131	0	0	0	0	0	0	0	0	0	0	0	0	0	0	0	0	0	0	0	0	0	0	0	0	0	0	0	0	0	0	0	5.133	0	0	0	0	0	0	0	4.007	0	0	0	5.581	6.939
72567	Bclaf1	13.492	62.499	48.643	7.653	1.774	4.223	2.461	17.083	4.435	1.321	5.502	0.839	4.631	2.524	3.166	6.613	0	0	0.839	0.565	2.484	0.485	4.656	1.87	0	1.199	2.375	0	0	3.805	0	4.523	4.529	11.2	10.85	8.941	9.304	9.163	24.981	5.504	11.324	14.041	15.759	22.467	22.238
72611	Zfp655	2.213	0	0	1.139	0	0	2.018	1.972	0	2.359	0	0	2.111	0	0	2.458	0	0.723	2.243	0	0	0	0	2.551	0	0	0	0	0	0	0	0	0	0	0	0	1.449	0	0.682	43.97	4.605	2.735	1.575	1.369	0
72720	Zfp248	0	0	0	0	0	0	0	0	0	0	0	0	0	0	0	0	0	0	0	0	0	0	0	0	0.432	0	0	0	0.599	0	0	0	0	0	0	0	0	0	0	0	0	0	0	0	0
72723	Zfp74	0	0	0	0	0	0.003	0	0	0	0	0	0	0	0.006	0	0	0	0.035	0	0	0.039	0	0.01	0.019	0	0	0	0	0	0	0	0	0	0.085	0	0	0	0	0	0.18	0	0	0	0	0
72739	Zkscan3	0	0	0	0	0	0	1.021	1.222	0	0	0	0	0	0	0	0	0	0	0	0	0	0	0	0	0	0	1.268	0	0	0	0	0	1.726	0	21.665	2.949	0	1.21	1.426	4.957	9.474	29.431	26.635	13.845	49.911
72958	Zfp493	0	0	0	0	0	0.007	0	0	0	0	0	0	0	0.045	0	0	0	0.07	0	0.011	0.079	0	0.021	0.06	0.053	0	0.037	0	0	0	0	0	0	0.169	0.063	0	0.033	0	0.044	0.359	0.033	0.024	0	0	0
73181	Nfatc4	1.539	2.648	2.453	1.578	0.792	1.041	1.948	0	2.521	1.947	0.289	0.205	0.107	8.105	6.07	4.196	8.519	4.827	4.986	8.424	3.759	13.575	5.239	3.607	1.024	1.061	1.424	3.308	4.566	3.163	6.284	2.716	5.629	2.521	1.879	4.768	5.756	1.334	1.149	6.723	5.942	5.618	6.203	5.184	5.385
73233	Zfp942	0	0	0	0	0	0.008	0	0	0	0	0	0	0	0.014	0	0	0	0.08	0	0	0.09	0	0.024	0.043	0	0	0	0	0	0	0	0	0	0.193	0	0	0	0	0	0.411	0	0	0	0	0
73389	Hbp1	0	0	0	0	1.432	2.208	0	1.345	3.073	3.526	3.428	1.947	5.969	4.73	4.937	8.466	9.866	14.782	6.755	10.795	9.132	4.624	18.472	14.231	4.926	6.113	4.578	5.936	5.894	5.866	2.678	11.78	16.13	6.79	7.516	6.788	7.394	0	7.11	6.147	9.095	9.934	2.834	11.855	13.652
73422	Prox2	0	0.279	0.247	0	0.644	0.629	0.689	0	1.951	0.576	1.738	0	0	2.951	3.007	2.49	3.251	3.696	6.779	3.788	3.818	1.028	2.401	2.024	1.218	1.157	0.983	1.839	1.68	1.966	2.132	3.49	1.661	3.464	2.846	3.119	2.905	3.203	2.538	0	1.557	1.748	1.259	1.429	1.653
73754	Thap1	32.315	18.538	6.951	5.176	6.014	6.503	5.017	8.867	2.491	5.586	10.415	11.922	6.506	6.212	7.38	0	5.728	7.715	11.276	5.544	5.365	8.492	9.804	7.548	2.271	0	2.495	3.399	1.398	0	12.457	15.783	0	0	1.393	3.214	6.09	9.891	6.832	6.9	3.801	3.653	0	0	0
74123	Foxp4	1.777	5.083	5.017	1.761	5.18	6.316	4.662	5.325	1.995	2.307	2.985	4.68	10.543	1.829	3.6	1.424	2.875	6.838	1.151	3.16	1.635	0	1.425	1.46	3.406	2.622	2.57	5.111	2.296	2.258	8.185	57.124	15.763	7.396	8.864	8.065	14.149	12.091	10.548	48.1	12.346	22	11.029	12.382	11.15
74149	Zfp946	0	0	0	0	0	0.006	0	0	0	0	0	0	0	0.011	0	0	0	0.059	0	0	0.067	0	0.018	0.032	0	0	0	0	0	0	0	0	0	0.142	0	0	0	0	0	0.303	0	0	0	0	0
74164	Nfx1	0	0	0	0	0	0	0.058	0	0	0	0	0	0	0	0.069	0	0	0	0	0	0	0.034	0	0	0	0	0	0	0	0	0	0	0	0	0	0	0	0	0	0	0	0	0	0	0
74400	Zfp819	0	0	0	0	0	0	0	0	0	0	0	0	0	0.016	0	0	0	0	0	0.006	0	0	0	0.011	0.027	0	0.018	0	0	0	0	0	0	0	0.031	0	0.017	0	0.022	0	0.017	0.012	0	0	0
74533	Gzf1	0.126	0	0	0	0	0	0.141	0	0.488	0	0	0	0	0	0	0	0	0	0	0.462	0.276	0	0.589	0.327	0	0	0	0.557	0	0	0	0.582	0	0	0	0	0	0	0	0	0	0	0	0	0
74570	Zkscan1	0	0	0	0.987	0.712	1.376	0.908	1.857	0	0	0	0	0	0	0	0	0	0	0	0	0	0	0	0	1.538	1.174	2.49	0	2.177	0	0	2.119	0	0	2.267	3.557	0	1.166	4.035	0	2.772	3.357	2.741	0	3.103
74670	Zfp943	0	0	0	0	0	0.006	0	0	0	0	0	0	0	0.011	0	0	0	0.062	0	0	0.07	0	0.019	0.034	0	0	0	0	0	0	0	0	0	0.15	0	0	0	0	0	0.319	0	0	0	0	0
75029	Purg	0	0	0	0	0	0	0	0	0	0	0	0	0	0	0	0	0	0	0	0	0	0	0	0	0	0	0	0	0	0	1.092	0	3.895	0	0	0	7.907	0	0	1.834	0	0	0	0	0
75424	Zfp820	0	0	0	0	0	0.006	0	0	0	0	0	0	0	0.011	0	0	0	0.062	0	0	0.07	0	0.019	0.034	0	0	0	0	0	0	0	0	0	0.15	0	0	0	0	0	0.319	0	0	0	0	0
75580	Zbtb4	0	0	0	0	0	0	0	0	0	0	0	0	0	0	0	0	0	0	0	0	0	0	0	0	0	0	0	0	0	0	0	9.45	0	0	0	0	0	0	0	0	0	9.934	0	0	0
76022	Gon4l	0	0	0	0.052	0.237	0.083	0.142	0.152	0.44	0.816	0.303	0.341	0.086	0	0.108	0	0.114	0	0	0	0	0	0	0	0	0	0	0	0	0	0	0.3	0	0	0	0	0	0	0	0	0	0.092	0	0	0
76373	Zfp773	0	0	0	0	0	0	0	0	0.342	0	0	0	0	0.367	0	0	0	0	0	0	0	0	0.478	0	0	0	0.371	0	0.498	0	0	0	0	0.356	0	0	0.29	0	0	0	0	0	0	0	0
76390	Zfp735	0	0	0	0	0	1.052	0	0	0	0	0	0	0	0	0	0	0	0	0	0	0	0	0	0	0	0	0	0	0	0	0	0	0	0	0	0	0	0	0	0	0	0	0	0	0
77044	Arid2	1.658	7.364	8.995	1.016	8.799	10.551	0.702	1.56	3.824	1.505	0.901	0.34	0.281	0.883	0.992	0.515	0	0.463	0.651	0.17	0.719	0.079	0.777	1.302	2.925	7.414	5.019	6.728	6.201	4.421	2.735	5.137	2.238	6.214	9.672	8.519	7.488	8.115	8.788	8.702	3.461	3.256	1.529	2.634	0.975
77117	Zfp934	0	0	0	0	0	0.008	0	0	0	0	0	0	0	0.016	0	0	0	0.088	0	0	0.1	0	0.026	0.048	0	0	0	0	0	0	0	0	0	0.213	0	0	0	0	0	0.453	0	0	0	0	0
77264	Zfp142	0	0.325	0.3	0	0.411	0	0.179	0.358	0.408	0.652	0.526	0.552	0.404	0	0.518	2.306	0.591	0	2.869	1.628	0	0.791	1.446	1.149	4.266	4.614	3.389	9.194	10.724	12.622	2.307	3.434	6.189	13.583	10.726	12.939	12.193	16.254	12.905	1.738	2.768	2.401	4.167	5.28	4.613
77286	Nkrf	0.098	0	0	0	0	0	0	0	0	0	0	0	0	0	0	0	0	0	0	0	0	0	0	0	0	0	0	0	0	0	0	0	0	0	0	0	0	0	0	0	0	0	0	0	0
77519	Zfp266	0	0	0	0	0.3	0	0	0	0	0	0	0	0	0	0	0	0	0	0	0	0	0	0	0	0	0	0	0	0	0.437	0	0.847	1.798	0	1.958	2.307	1.454	1.239	2.069	2.936	0	1.344	1.66	0	0
77862	Thyn1	49.686	241.877	180.174	41.051	120.659	124.389	13.424	12.366	2.021	0	0	0	0	0	0	0	0	0	0	6.662	0	2.175	3.746	0	78.108	71.129	65.765	81.665	61.671	54.55	69.319	69.646	240.099	149.629	130.699	191.584	183.658	285.605	255.047	297.721	315.497	289.513	250.083	159.086	213.475
78251	Zfp712	0	0	0	0	0	0.004	0	0	0	0	0	0	0	0.007	0	0	0	0.041	0	0	0.047	0	0.012	0.022	0	0	0	0	0	0	0	0	0	0.1	0	0	0	0	0	0.213	0	0	0	0	0
78266	Zfp687	5.157	4.884	7.526	5.852	6.651	11.489	2.107	2.134	3.501	0	0	1.305	0	0	3.106	0	0	0	0	1.618	0	0	0	1.506	3.435	5.304	2.004	5.872	1.127	4.244	0.895	9.089	3.651	3.62	3.035	5.087	2.76	5.992	2.176	4.872	2.033	1.351	0.703	1.935	13.968
78619	Zfp449	0	0	0	0	0	0.005	0	0	0	0	0	0	0	0.01	0	0	0	0.053	0	0	0.06	0	0.016	0.029	0	0	0	0	0	0	0	0	0	0.129	0	0	0	0	0	0.274	0	0	0	0	0
78829	Tsc22d4	0	0	0	0	0	0	0	0	0	0	0	0	0	0	0.11	0	0	0	0	0	0	0	0	0.518	0	0	0	0	0	0	0	0	0	0	0	0	0	0	0	0	0	0	0	0	0
78912	Sp2	7.695	2.236	3.433	0.913	0.219	0	0.685	0	0	0	0	0	0	0	0	0	0	0	0	0	0	0	0	0	0	0	0	0	0	0	0	0	0	0	0	0	0	0	0	0	0	0	0	0	0
79233	Zfp319	0	0	0	0	0	0.004	0	0	0	2.807	0	0	0	0.008	0	0	0	0.047	0	0	0.053	0	0.014	0.025	0	0	0.716	0	0	1.53	3.265	0	0	0.113	1.586	0	1.105	2.548	0	0.24	0	1.698	0	0	0
79362	Bhlhe41	0	0	0	0	0	0	0	0	0	0	0	0	5.159	0.804	0.871	0	2.919	3.202	0	4.396	5.757	1.541	5.789	1.754	0	1.141	0.996	1.78	1.444	1.945	2.451	3.182	0	4.056	5.726	5.409	13.153	12.203	11.8	4.322	2.761	2.658	0	1.934	3.629
80732	Mynn	0	0	0	0	0.229	0.293	0	0	0	0	0	0	0	0	0	0	0	0	0	0	0	0	0	0	0	0	0	0	0	0	0	0	0	0	0	0	0	0	0	0	0	0	0	0	0
80892	Zfhx4	6.474	1.16	0.765	2.971	0.178	0.163	0	2.167	0.088	0.192	0	0.096	2.392	0.098	0	0	0.116	0.268	0.118	0.089	0.327	1.433	0	0.091	0.163	0	0.103	0	0.282	0.442	0.163	1.666	0	1.329	0.983	1.108	0.648	0.805	0	6.042	0	0	0.177	0	0
81630	Zbtb22	0	0	0	0	0	0	0.064	0	0	0	0	0.178	0.281	0	0	0	0	0	0	0	0	0	0	0	0	0	0	0	0	0	0	0.101	0	0	0	0	0	0	0	0	0	0	0	0	0
81703	Jdp2	6.264	0	0	0.53	0	0	0	0	0	0	0	0	0	0	0	0	0	0	0	0	0	0	0	0	0	0	0	0	0	0	0	0	0	0	0	0	0	0	0	0	0	0	0	0	0
81879	Tfcp2l1	0	30.869	28.818	0	0.212	0	0	0	0	0	0	0	0	0	0	0	2.795	2.051	0	0	0	0	0	0	0	0	0	0	0	0	0.75	1.244	22.268	21.109	18.975	23.075	0	23.501	25.314	20.318	18.066	17.844	0	0	3.009
83383	Tfap4	273.864	152.823	198.769	162.263	88.986	101.04	118.391	200.893	41.474	27.61	94.38	84.32	84.23	40.124	66.042	37.071	25.383	42.036	55.293	34.46	66.031	50.566	28.086	26.104	14.709	7.072	9.31	10.792	8.297	7.738	148.432	47.965	1.57	2.517	3.969	3.302	3.13	5.843	3.79	5.998	1.737	1.425	0	1.624	0.936
83396	Glis2	0	0	0	0	0	0	0.276	0	0	0	0	0	0	0	0	0	0	0	0	0	0	0	0	0	0	0	0	0	0	0	0	0.299	0	0	0	0	0	0	0	0	0	0	0	0	0
83925	Trps1	4.912	5.857	4.624	0.42	0.723	0.951	0.667	0.82	0	0.314	0.581	0.203	1.648	0.35	0.342	0	0.366	0.317	0	0	0.336	0.713	0	0	0	0	0	0	0	0	0.464	0.587	0	0	0	0	0	0	0	0	0	0	0	0	0
84505	Setdb1	0	0	0	0	0	3.157	0	0	0	0	0	0	0	0	0	0	0	0	0	0	0	0	3.498	0	0	0	0	0	0	0	0	0	0	0	0	0	0	0	0	0	0	0	0	0	0
93691	Klf7	4.801	0	2.103	5.673	0	0	2.72	2.728	0	0	0	0	0.713	0	2.153	1.182	0	0	0	0	0.842	4.198	1.069	0.9	1.619	0	1.494	1.185	0	0	0	1.274	0	0	0	0	0	0	0	0	0	0	0	0	0
93736	Aff4	0	0	0	0	0	0	0	0	0	0	0	0	0.108	0	0	0	0	0	0	0	0	0	0	0	0	0	0	0	0	0	0	0	0	0	0	0	0	0	0	0	0	0	0	0	0
93760	Arid1a	3.585	33.932	19.562	2.377	13.316	21.883	10.465	10.151	14.563	5.361	9.163	13.863	15.621	6.078	6.651	7.831	10.928	12.052	4.032	6.138	4.337	1.786	4.395	4.395	12.743	10.262	10	14.9	14.614	16.598	7.333	14.746	6.566	15.908	17.478	18.26	13.556	18.305	17.267	23.141	8.724	5.471	10.682	7.479	6.66
93761	Smarca1	255.537	233.674	222.341	129.369	213.266	233.264	179.713	187.633	235.993	120.091	96.385	131.057	157.158	166.349	178.546	150.182	145.456	149.869	159.432	204.502	150.845	117.548	153.089	110.145	117.751	96.318	83.916	125.985	143.988	116.86	143.726	91.688	26.872	86.251	107.045	116.034	57.341	77.381	92.844	68.327	64.366	46.441	52.072	28.2	34.918
93837	Dach2	0	0	0	0	0	0	0	0	0	0	0	0	0	0	0	0	0	0	0.353	0	0	0	0	0	0	0	0	0	0	0	0	0	0	0	0	0	0	0	0	0	0	0	0	0	0
94246	Arid4b	2.561	1.221	0.252	0.459	0	0	0.087	0	0	0	0	0	0	0	0	0	0	0	0	0	0	0	0	0	0	0	0	0	0	0	0	0	0	0	0	0	0	0	0	0	0	0	0	0	0
97165	Hmgb2	18750.8	16400.3	17227.6	31365.9	27791.4	28730.4	38209.7	34003	36167.2	55099.3	49210.1	57169.6	53781.6	40771.7	41179.5	45160.8	38517.6	35131.7	37421.9	31305.1	34225.8	34566.1	27686.8	32639.4	29805.4	29099	25346.1	20670	20508.6	22734.6	15083	22283.1	3727.52	9673.49	9142.64	10824.8	7006.17	7495.7	7609.63	4369.18	3432.25	3134.59	5119.57	2161.27	2415.33
98999	Znfx1	0	0	0	0	0	0	0	0.211	0	0	0	0	0.062	0	0	0	0	0	0	0	0	0	0	0	0	0	0.104	0	0	0.108	0	2.049	2.241	0.829	0.837	0.359	0.576	1.169	1.408	3.233	1.845	3.548	5.169	1.738	3.907
99334	Zscan29	0	0	0	0	0	0.002	0	0	0	0	0	0	0	0.004	0	0	0	0.025	0	0	0.028	0	0.007	0.013	0	0	0	0	0	0	0	0	0	0.06	0	0	0	0	0	0.128	0	0	0	0	0
99377	Sall4	1.936	3.095	2.892	0	0.469	0.432	0	0	0.149	0	0	0	0	0	0	0	0	0	0	0	0	0	0	0	0	0	0	0	0	0	0	0	0	0	0	0	0	0	0	0	0	0	0	0	0
100090	Zbtb48	4.459	4.568	2.862	5.418	0.748	0.49	0	0	0	0	0	0	0	0	3.341	0	0	0	0	0	0	0	0	0	0	23.792	0	14.34	0	0	0	0	0	2.28	36.192	30.224	18.453	2.597	12.605	2.914	0	0	0	0	0
100978	Nfxl1	0	0	0	0	0	0	0	0	0	0.998	2.699	4.838	11.045	0.746	0.163	1.736	0.25	0	2.308	0.515	0.294	0	0	0	0.427	0	0.459	0.969	0	1.452	0	4.225	0	0.66	0	0.635	0	0	0	1.267	0	0	0	0.826	0
101835	AW146154	0	0	0	0	0	0	0	0.211	0	0	0	0	0	0.022	0	0	0	0	0	0.008	0	0	0	0.015	0.037	0	0.026	0	0	0	0	0	0	0	0.044	0	0.023	0	0.031	0	0.023	0.017	0	0	0
104349	Zfp119a	0	0	0	0	0	0.004	0	0	0	0	0	0	0	0.007	0	0	0	0.039	0	0	0.044	0	0.012	0.021	0	0	0	0	0	0	0	0	0	0.093	0	0	0	0	0	0.198	0	0	0	0	0
104360	Isl2	0	10.518	0	0	0	0	0	0	0	0	0	0	0	0	0	0	0	0	0	0	0	0	0	0	0	0	0	0	0	0	0	0	0	0	0	0	0	0	0	0	0	0	0	0	0
104383	Rcor2	11.985	26.148	9.877	0	7.339	7.946	0	0	0	0	0	0	0	5.146	5.561	3.445	9.463	5.358	2.197	4.846	4.804	3.281	8.062	8.391	6.964	8.278	6.962	9.272	9.621	16.801	8.538	0.246	34.917	77.516	64.103	14.744	6.629	6.785	6.149	12.143	5.953	6.308	3.957	5.71	4.196
104394	E2f4	72.448	158.673	117.239	138.063	328.521	324.848	228.006	393.121	315.728	221.38	293.129	329.152	276.888	157.364	150.513	169.798	126.641	140.714	95.618	69.268	67.877	62.946	40.828	31.477	69.611	69.99	68.774	68.153	71.485	71.627	74.203	85.554	39.448	37.189	50.354	16.379	33.723	45.146	42.53	62.61	40.766	34.328	34.959	13.656	44.984
107751	Prrxl1	0	0	0	0	0	0	0	0	0	0	0	0	0	0	0	0	0	0	0	0	0	0	0	0	0	0	0	0	0	0	0.96	0.567	0	0	0	0	0	0	0	0	0	0	0	0	0
108655	Foxp1	31.01	56.994	37.474	30.482	46.321	59.596	30.461	29.94	45.325	30.128	0.81	10.341	61.59	44.937	42.969	56.153	31.057	67.364	66.761	46.348	22.482	16.066	48.143	44.661	32.849	35.244	41.228	43.316	43.145	43.767	38.785	97.618	93.148	84.04	56.243	91.965	93.923	73.361	93.377	199.058	96.11	84.319	42.697	60.117	57.597
108899	2700081O15Rik	8.54	2.645	2.565	2.679	0.655	0.916	0.953	0	0	0	0	0.271	0.242	0	0	0	0	0	0	0	0	0.527	0	0	0	0.733	0	0	0	0	0	1.119	0	0	0	0	0	0	0	0	0	0	0	0	0
108946	Zzz3	0	0	0	0	0	3.314	0.251	0	4.413	0	0	0	0	0	0	0	0	0	0	0	0	0	0	0	0	0	0	0	0	0	0	0	0	0	0	0	0	0	0	0	0	0	0	0	0
108961	E2f8	2.44	1.427	0.844	0.674	2.128	1.091	125.872	97.092	1.083	0.945	115.028	32.309	54.402	0.545	1.172	0	0	0.481	0	0	0.461	0	0	0	0	0	0	0	0	0	227.819	0	0	0	0	0	0	0	0	0	0	0	0	0	0
109032	Sp110	3.514	14.075	2.22	9.399	2.704	19.307	14.409	3.773	3.453	6.136	3.061	5.549	2.02	44.46	44.432	12.096	4.34	11.17	22.512	16.163	13.844	23.15	16.402	23.514	25.634	34.607	9.43	8.485	9.515	7.765	33.527	28.521	0	0	0	0	0	4.7	0	9.777	0	0	0	0	0
109263	Rlf	2.633	5.277	4.16	4.182	5.436	8.899	4.034	5.067	2.551	0.577	0.118	2.49	0.171	1.31	0.561	0	0.339	0.23	0	0.693	0.621	0.174	0.188	0	6.617	3.042	3.147	2.534	2.456	2.945	0.831	2.963	0.554	0	2.7	0.154	1.405	0	1.347	1.104	0	0.933	0	0	0
109910	Zfp91	1.33	0	0	0	0	0.743	0.435	4.009	6.205	8.77	1.609	8.235	7.915	0	0	12.416	0	0	20.181	0	18.233	1.853	0	9.249	0	0	0	0	0	0	0	5.305	0	0	0	0	0	0	0	33.382	0	0	0	0	0
110593	Prdm2	5.068	3.52	3.041	1.514	0.067	0.453	1.197	0.309	0.618	0.402	0.374	0.301	0.567	0.723	0.632	0	0	0.52	0	0.728	0.709	0.519	0.962	0	0	0	1.356	0	0	1.293	0	1.085	3.683	28.456	21.605	11.094	4.207	4.23	19.411	8.964	7.258	16.994	3.076	33.755	31.67
110784	Nr3c2	0	0	0	0	0	0	0	0	0	0	0	0	0	0	0	0	0	0	0	0	0	0	0	0	0	0	0	0	0	0	0	0	0	0	0	0	0	0	0	0.983	0	0	0	0	0
110794	Cebpe	7.152	0	0	6.602	0	0	3.038	6.335	0	3.726	29.011	20.512	7.77	0	0	34.072	0	0	21.086	0.73	15.143	49.87	0	0	0	23.074	0	0	36.56	33.276	56.396	23.76	0	0	0	0	0	0	0	0	0	0	0	0	0
114142	Foxp2	0	0	0	0	0	0	0	0	0	0	0	0	0	0	0	0	2.951	0	0	0	0.101	0	0	0	0	0	0	0	0	0	0	0.529	0	0	0	0	0.337	0	0	0	0.145	0.29	0	0	0
114565	Zbtb21	1.763	0	0	0	0	0	0	0	0	0	0	0	0	0	0	0	0	0	0	0	0	0	0	0	0	0	0	0	0	0	0	0	0	0	0	0	0	0	0	0	0	0	0	0	0
114604	Prdm15	0	0	0	0	1.006	0	0	0	1.814	0	0	0	0	0	0	0	0	0	0	0	0	0	0	0	0	0	0	0	0	0	0	0	0	0	0	0	0	0	0	0	0	0	0	0	0
114674	Gtf2ird2	0	4.647	4.489	2.198	0	3.586	0	0	0	0	0	0	0	0	0	0	0	0	0	0	0	0.635	0	0	0	0	0	0	0	0	0	0	0	3.227	3.873	3.978	3.984	4.603	3.978	0	0	0	0	0	0
116810	Foxn4	0	1.601	0	0	0	3.079	0.036	0	0	0	0	0	0	4.022	3.426	0	3.047	3.65	0	0	3.235	0	2.777	2.394	0	0	0	0	0	0	0	0	0	0	0	0	0	0	0	0	2.184	0	2.249	0	0
116848	Baz2a	6.836	4.29	6.284	2.518	8.839	7.112	4.48	4.314	5.138	6.313	5.118	8.911	4.048	8.364	7.521	11.661	9.036	11.737	11.427	22.817	16.57	7.822	13.071	16.182	13.852	4.366	14.176	19.717	18.379	27.047	24.134	21.042	5.144	5.752	8.93	6.473	14.493	95.992	94.964	68.472	2.754	6.595	7.813	6.008	8.61
116870	Mta1	5.753	11.238	17.712	5.697	2.556	3.18	3.429	2.489	1.176	1.493	0.547	2.188	1.211	1.024	1.312	4.477	1.028	1.044	12.959	2.028	1.596	1.024	1.338	1.136	1.921	0.092	1.639	2.503	4.091	4.083	1.686	4.912	1.272	5.848	6.182	2.495	2.503	13.419	11.463	14.574	2.521	3.386	0	2.113	1.859
116871	Mta3	2.057	11.75	10.505	1.988	6.54	5.528	1.506	7.066	3.846	1.239	2.54	4.696	5.431	3.177	2.777	5.465	3.088	3.507	12.469	2.072	4.785	1.816	4.258	1.56	4.447	2.811	2.251	6.492	3.554	10.429	5.449	12.412	4.258	8.214	8.876	7.581	9.22	13.021	12.843	18.09	3.424	6.722	0	6.181	5.877
118445	Klf16	5.16	1.546	13.502	3.783	35.427	45.143	11.029	0	0	1.331	0	0	1.69	0	0	0	0	0	0	0	0	0	0	0	0	0	0	0	0	0	0	1.903	0	0	0	0	0	0	0	0	0	0	0	0	0
170729	Scrt1	0	0	0	0	0	0	0	0	0	0	0	0	0	0	0	0	9.151	0	0	0	0	0	0	0	0	0	0	0	0	0	0	0	0	0	0	0	0	0	0	0	0	0	0	0	0
170740	Zfp287	0	0	0	0	0	0.003	0	0	0	0	0	0	0	0.006	0	0	0	0.033	0	0	0.037	0	0.01	0.018	0	0	0	0	0	0	0	0	0	0.08	0	0	0	0	0	0.169	0	0	0	0	0
170763	Zfp87	0	0	0	0	0	0.003	0	0	0	0	0	0	0	0.007	0	0	0	0.036	0	0	0.041	0	0.011	0.02	0	0	0	0	0	0	0	0	0	0.087	0	0	0	0	0	0.186	0	0	0	0	0
193452	Zfp184	0	0	0	0	0	0.003	0	0	0.149	0	0	0	0	0.165	0	0	0	0.029	0	0	0.032	0	0.217	0.016	0	0	0.162	0	0.217	0	0	0	0	0.224	0	0	0.126	0	0	0.147	0	0	0	0	0
195522	Zfp691	0	1.168	1.17	0	0.324	0.582	0	0	0	0	0	0	0	0.014	0	0	0	0.08	0	0	0.09	0	0.024	0.043	0	0	0	0	0	0	0	1.169	0	0.193	2.403	3.005	0	0	0	6.065	5.193	1.466	0	3.099	3.231
195733	Grhl1	0	0	0	0	0	0	0	0	0	0	0	0	0	0	0	121.217	0	0	8.417	0	0	0	0	0	0	0	0	0	0	0	0	0	0	0	0	0	0	0	0	0	0	0	0	0	0
207259	Zbtb7c	0	0	0	0	0	0	0	0	0	0	0	0	0	0	0	0	0	0	0	0	0	0	0	0	0	0	0	0	0	0	0	0	0	0	0	0	0	0	0	0	1.407	0	0	0	0
208076	Pknox2	4.279	8.68	8.828	3.557	6.064	6.098	6.068	6.665	3.325	0	1.211	0.492	0	0	0	0	1.56	0	0	0	0	0	0	1.485	2.287	2.371	1.948	0	3.049	2.88	0	186.819	3.641	4.4	5.693	5.073	6.247	5.169	4.85	0	2.98	3.21	2.919	2.55	2.65
208104	Mlxip	1.166	2.502	2.287	0.81	1.855	1.259	1.072	3.143	0	0.283	0	0	0.766	1.277	1.095	2.563	1.371	1.101	1.569	1.695	1.549	1.559	2.449	2.014	2.213	1.899	2.139	2.149	2.768	2.715	3.964	7.113	2.123	0	2.072	1.775	5.484	4.706	0	0.935	0	2.143	2.748	0	1.624
208292	Zfp871	1.425	0	0	0.626	0	0	1.051	0.508	0	1.132	0.556	0.963	0	0	0	0	0	0	0	0	0	0	0	0	0	0	0	0	0	0	0.613	0	0	0	0	0	0	0	0	0	0	0	0	0	0
208647	Creb3l2	4.641	0	0.186	4.935	0	0	0.833	4.222	0	0	2.228	1.351	1.712	0	0	0	0	0	0	0.599	0.132	8.034	0	0	0	347.802	0	0	0	0	0	7.389	0	0	0	512.611	0	0	1.356	1.116	1.681	1.68	0	0	0
208677	Creb3l3	0	0	0	0.279	0	20.793	0	0	0	0	4.084	0.676	0	0	0	0	0	0	2.679	7.643	7.37	3.031	36.209	23.868	0.273	4.539	4.036	6.889	0	7.334	21.615	35.269	79.398	0	65.486	4.218	3.905	9.346	0	38.057	9.81	6.293	3.818	2.874	3.957
208968	Zfp280c	2.181	2.036	2.371	2.653	1.872	2.534	2.063	1.391	4.175	0.678	0.759	0.783	0.688	0	1.347	0	1.177	0	0	2.157	0	0	0	1.845	0.429	0	0.385	0	0	0.984	3.518	3.943	0	0	0	0	0	0	0	0.952	0	0	0	0	0
209225	Zfp710	0.702	0	0	0.487	0	0	0.47	0	0	0	0	0	0	0	0	0	0	0	0.598	0	0	1.169	0	0	0	0	0	0	0	0	4.231	7.355	0	4.767	2.848	8.3	4.654	0	0	3.692	0	0.868	0	0	0
209446	Tfe3	29.42	45.623	24.141	10.154	5.298	7.982	3.116	4.284	2.049	0	3.837	1.841	0	3.977	5.634	1.876	2.588	5.033	1.304	2.07	2.313	21.907	6.689	3.079	12.218	13.248	12.861	13.536	22.834	16.268	34.547	12.84	16.077	32.82	21.209	30.691	34.134	15.094	38.056	60.897	21.347	21.576	23.026	20.419	24.269
210104	Zfp658	0	0	0	0	0	0.002	0	0	0	0	0	0	0	0.005	0	0	0	0.025	0	0	0.029	0	0.008	0.014	0	0	0	0	0	0	0	0	0	0.061	0	0	0	0	0	0.131	0	0	0	0	0
210135	Zfp180	0	0	0	0	0	0	0	0	0	0	0	0	0	0.016	0	0	0	0	0	0.006	0	0	0	0.011	0.027	0	0.018	0	0	0	0	0	0	0	0.031	0	0.017	0	0.022	0	0.017	0.012	0	0	0
210162	Zkscan2	0	0	0	0	0	0	0	0	0.119	0	0	0	0	0.127	0	0	0	0	0	0	0	0	0.166	0	0	0	0.129	0	0.173	0	0	0	0	0.123	0	0	0.101	0	0	0	0	0	0	0	0
210503	Zfp677	0	0	0	0	0	0.003	0	0	0	0	0	0	0	0.007	0	0	0	0.036	0	0	0.041	0	0.011	0.02	0	0	0	0	0	0	0	0	0	0.087	0	0	0	0	0	0.186	0	0	0	0	0
210853	Zfp947	0	0	0	0	0	0.006	1.307	0	0	2.716	1.576	1.537	0	0.012	3.403	0	0	0.066	0	0	0.074	0	0.02	0.036	0	0	0	0	0	0	0	0	0	0.159	0	0	0	0	0	0.338	0	0	0	0	0
211586	Tfdp2	35.141	36.242	14.617	44.407	36.394	33.976	48.929	118.125	29.988	55.606	96.831	87.759	108.473	83.144	44.712	46.194	53.299	40.344	27.674	45.045	19.567	28.75	45.561	23.95	17.977	8.766	7.748	13.263	0	5.127	35.621	39.537	0	0	0	0	2.502	1.611	0	23.323	8.69	3.289	0	0	0
212276	Zfp748	0	0	0	0	0	0.003	0	0	0	0	0	0	0	0.005	0	0	0	0.027	0	0	0.031	0	0.008	0.015	0.483	0	0	0.409	0	1.697	0	0	0	0.066	0	0	0	0	0	0.14	0	0	0	0	0
212391	Lcor	0	1.351	0.462	0	2.057	5.897	3.516	2.055	2.482	1.243	2.539	2.562	1.978	2.908	2.071	2.489	3.914	5.779	8.656	13.974	8.187	0.861	3.1	2.373	5.892	2.125	3.533	2.901	7.32	4.712	9.976	23.387	2.795	2.243	2.375	0	3.539	2.799	2.957	3.966	0	0	0	3.208	3.757
212569	Zfp273	0	0	0	0	0	0.006	0	0	0	0	0	0	0	0.011	0	0	0	0.062	0	0	0.07	0	0.019	0.034	0	0	0	0	0	0	0	0	0	0.15	0	0	0	0	0	0.319	0	0	0	0	0
213054	Gabpb2	86.423	198.697	152.69	151.12	230.14	218.365	220.856	210.865	365.813	177.691	229.281	213.33	189.917	459.915	441.373	180.672	210.814	307.41	98.712	476.699	290.685	111.876	314.368	313.286	398.938	206.234	229.821	211.272	211.883	285.062	478.111	194.602	115.346	257.819	264.332	241.577	183.864	184.428	137.73	149.413	178.528	153.019	140.389	169.729	53.801
214742	Rcor3	17.964	32.278	25.262	6.583	24.893	27.521	6.148	1.493	8.241	0	0.281	0.395	2.243	14.094	13.047	9.213	13.186	6.479	4.928	8.916	7.833	6.824	13.889	1.526	22.18	22.019	14.826	36.546	36.6	39.11	27.471	25.669	36.548	69.173	60.336	71.096	57.966	49.519	51.691	58.61	34.333	46.753	23.765	35.712	27.245
214779	Zfp879	0	0	0	0	0	0.004	0	0	0	0	0	0	0	0.007	0	0	0	0.041	0	0	0.047	0	0.012	0.022	0	0	0	0	0	0	0	0	0	0.1	0	0	0	0	0	0.213	0	0	0	0	0
214812	Zfp609	1.881	9.291	1.382	1.068	0.291	10.654	0.245	0.706	0.281	0	0	0	0	0.412	0.444	0	0	0	0	0	6.05	0	0	0	0	0	0	0	0	0.578	2.694	1.164	0	0	0.859	0	0.589	0	0.524	0	0	0	0	0	0
216285	Alx1	0	0	0	0	0	0	0	0	0	0	0	0	0	0	0	0	0	0	0	0	0	0	0	0	0	0	0	0	0	0	0.657	0.388	0	0	0	0	0	0	0	0	0	0	0	0	0
217031	Tada2a	0	0	0	0	0.286	0	0	0	0	0	0	0	0	0	0	0	0	0	0	0	0	0	0	0	0	0	0	0	0	0	0	0	0	0	0	0	0	0	0	0	0	0	0	0	0
217166	Nr1d1	0	0	0	0	0	0	0	0	0	0	0	0	0	0	0	0	0	0	0	0	0	0	0.218	0	0	0	0	0	0	0	0	0	0	0	0	0	0	0	0	0	0	0	0	0	0
217653	Mis18bp1	0	0	29.31	0.117	14.189	0	0	0.029	0.24	0	0.333	0	0	0	0	0	0	0	0	0	0	0	0	0	0	0	0	0	0	0	0	0	0	0	0	0	0	0	0	0	0	0	0	0	0
217864	Rcor1	87.833	203.294	171.719	40.969	136.702	170.455	70.056	24.089	66.41	24.109	4.33	5.364	21.779	65.636	60.583	32.811	70.874	72.651	16.763	37.461	48.559	31.151	58.608	25.58	70.547	62.369	71.247	129.945	140.96	150.738	150.347	669.395	124.13	328.312	255.194	313.398	326.252	278.403	292.358	309.227	232.62	276.112	192.585	249.942	170.594
218314	Zfp595	0	0	0	0	0	0.003	0	0	0	0	0	0	0	0.006	0	0	0	0.034	0	0	0.038	0	0.01	0.018	0	0	0	0	0	0	0	0	0	0.082	0	0	0	0	0	0.174	0	0	0	0	0
218613	Mier3	0	0	0	0	0	0.509	0	0	0	0	0	0	0	0	0	0	0	0	0	0	0	0	0	0	0	0	0	0	0	0	0	0	0	0	0	0	0	0	0	0	0	0	0	0	0
218772	Rarb	12.339	13.146	12.069	5.737	6.88	8.749	1.999	2.456	7.312	0.103	0.864	0.386	3.607	0.806	0.472	0.197	0.909	0.96	0.111	0.677	0.431	0.959	0	0	0.611	1	0.46	0	0.618	1.398	3.601	9.553	5.253	16.179	17.418	16.487	15.707	17.978	15.18	8.792	4.658	7.729	2.94	3.497	3.558
218973	Wdhd1	0	0.301	0.78	1.004	0.488	0.395	1.787	5.902	0	0	0	0	0	0	0	0	0	0	0	0	0	0	0	0	0	0	0	0.998	0.999	0	0	0	0	0	0	0.921	0	0	0	0	0	0	0	0	0
219150	Hmbox1	12.259	33.255	31.971	3.468	7.86	10.72	0	0	1.592	0	0	0	0	1.345	0	2.751	1.847	2.292	2.443	2.212	0	0	0	0	12.539	12.257	10.128	23.599	32.698	19.559	15.186	20.464	22.467	51.417	49.765	44.756	58.204	44.72	50.148	46.233	22.036	20.522	25.786	24.564	22.811
223669	Zfp7	0	0	0	0	0	0	0	0	0	0	0	0	0	0.014	0	0	0	0	0	0.005	0	0	0	0.009	0.023	0	0.016	0	0	0	0	0	0	0	0.027	0	0.014	0	0.019	0	0.014	0.01	0	0	0
223773	Zbed4	0	0	0	0	0.604	0	0	0.171	0	0	0	0.113	0	0	0	0	0	0	0	0	0	0	0	0	0	0	0	0	0	0	0	0	0	0	0	0	0	0	0	0	0	0	0	0	0
223922	Atf7	24.097	57.459	27.009	5.63	14.65	14.148	16.098	23.425	14.369	10.113	16.869	8.731	0	11.743	7.668	17.213	20.331	18.733	7.236	7.898	6.91	5.612	2.002	4.507	5.037	3.781	2.036	0	0	7.125	6.357	0	3.845	3.165	5.354	3.076	11.6	10.231	9.941	107.545	14.444	10.604	3.925	0	0
224481	Tfb1m	0	1.272	2.281	0.759	1.547	1.27	0	1.725	2.095	2.202	1.869	5.123	1.96	2.275	0	3.383	2.817	1.11	4.508	4.777	5.123	1.244	4.449	5.366	3.582	5.687	2.906	6.003	6.716	10.354	5.811	29.089	3.011	8.712	10.726	10.943	8.543	7.709	5.901	2.362	2.944	6.093	0	3.306	2.7
224585	Zfp160	0	0	0	0	0	0.004	0	0	0.224	0	0	0	0	0.268	0	0	0	0.043	0	0.007	0.049	0	0.325	0.037	0.033	0	0.265	0	0.326	0	0	0	0	0.336	0.038	0	0.21	0	0.027	0.221	0.02	0.015	0	0	0
224598	Zfp758	0	0	0	0	0	0.006	0	0	0	0	0	0	0	0.011	0	0	0	0.062	0	0	0.07	0	0.019	0.034	0	0	0	0	0	0	0	0	0	0.15	0	0	0	0	0	0.319	0	0	0	0	0
224656	Zfp523	0	2.338	0	0.468	0	1.877	0	0	5.208	0	0	0	0	0	0	0	0	0	0.9	0	0	0	0	0	0	0	0.359	0	0.499	1.207	0	0.722	0	0	0	0	0	0	0	0	0	0	0	0	0
224829	Trerf1	0.134	1.188	0	0	0	0	0	0	0	0	0	0	0	0	0	0	0	0	0	0	0	0	0	0	0	0	0	0	0	0	0	0	0	0	0	0	0	0	0	0	0	0	0	0	0
224893	Zfp959	0	0	0	0	0	0.004	0	0	0	0	0	0	0	0.007	0	0	0	0.04	0	0	0.045	0	0.012	0.022	0	0	0	0	0	0	0	0	0	0.097	0	0	0	0	0	0.205	0	0	0	0	0
225631	Onecut2	10.999	13.351	13.276	4.816	6.539	4.218	3.767	9.802	2.87	1.931	15.649	18.326	17.199	3.798	3.427	16.923	11.074	13.328	41.118	43.081	36.885	36.35	31.574	22.55	21.684	19.826	22.04	28.626	34.192	46.769	69.58	56.53	76.279	32.67	44.802	52.712	99.919	113.056	112.588	255.807	79.468	101.457	88.294	107.758	102.066
225908	Myrf	0	0.139	0	0	0	0	0	0	0.73	0	0	0	0	0	0	0	0	0	0	0	0	0	0	0	0	0	0	0	0	0	0	0	0	0	0	0	0	0	0	0	0	0	0	0	0
225998	Rorb	0	0	0	0	0	0	0	0	0	0	0	0	0	0	0	0	0	0	0	0	0	0	0.4	0.261	0	0	0	0	0	0	2.614	0.667	0	0	0	0	3.508	0	2.989	0	0.871	0	0	0	0
226075	Glis3	0	0	0	0	0	0	0.106	0	0	0	0	0	0	0	0	0	0	0	0	0	0	0	0	0	0	0	0	0	0	0	0	0.115	0	0	0	0	0	0	0	0	0	0	0	0	0
226442	Zfp281	20.416	1.441	0	0.084	0.515	3.467	0	1.675	0	0	0	0	0	0	0	0	0	0	0	0	0	0	1.831	0	0	0	0	0.766	0.685	0	3.177	27.722	11.178	4.246	9.384	13.228	12.559	8.181	10.248	40.104	15.952	7.003	10.063	13.627	14.648
226470	Zbtb41	0	0	0	0	0	0	0	0	0	0	0	0	0	0	0	0	0.134	0	0	0	0	0	0	0	0	0	0	0	0	0	0	0	0	0	0	0	0	0	0	0	0	0	0	0	0
226641	Atf6	1.504	0	0.287	1.948	0.174	0.964	1.23	1.375	0.267	0	1.685	0	0	0	0	0	0	0	0	0	0	0	0	0	0	0	0	0	0	0	0	0	0	0	0	0	0	0	0	0	0	0	0	0	0
226747	Ahctf1	362.806	324.719	431.98	125.129	85.274	87.844	53.726	43.058	24.187	12.256	9.834	8.565	9.949	6.236	7.154	6.169	7.582	9.603	9.444	8.678	8.697	11.174	9.833	11.536	193.883	36.128	33.751	54.674	52.337	48.175	39.323	83.067	96.19	189.459	199.097	209.852	255.468	265.419	253.546	338.783	101.975	97.113	83.623	103.353	81.088
228598	Ebf4	0.099	0	0	0	0	0	0	0	0	0	0	0	0	0	0	0	0	0	0	0	0	0	0	0	0	0	0	0	0	0	0	0	0	0	0	0	0	0	0	0	0	0	0	0	0
228839	Tgif2	19.743	14.103	9.16	13.065	8.232	5.187	13.317	10.588	1.495	0.969	0.585	0.931	13.109	20.476	0	1.919	21.809	2.98	1.507	23.446	5.289	0.555	24.872	23.049	3.156	0	1.388	1.844	2.51	2.293	0.616	19.993	1.156	0.797	1.085	0	1.18	1.561	1.403	1.012	1.051	0.916	2.133	2.215	1.655
228876	Zfp334	0	0	0	0	0	0	0	0	0	0	0	0	0.083	0	0	0	0	0	0	0	0	0	0	0	0	0	0	0	0	0	0	0	0	0	0	0	0	0	0	0	0	0	0	0	0
228911	Tshz2	0.327	0.355	2.592	0	0	0	0	0	0	0	0	0	0	0	0	0	0	0	0	0	0	0	0	0	0	0.068	0	0	0	0	0	0	0	0	0	0	0	0	0	0	0	0	0	0	0
228913	Zfp217	0	0	0	0	1.24	0	0	0	0	0	0	0	0	0	0	0	5.69	0	0	0	0	0	0	0	0	0	0	0	0	0	0	0	0	0	0	0	0	0	0	0	0	0	0	0	0
229004	Gmeb2	1.396	10.517	5.703	4.295	7.846	8.75	0.89	1.346	0	0	0	0	0	0	0.244	0	0	0	0	0	0	0	0	0	0	0	0	0	0	0	0	0	8.494	0	0	0	0	0	1.154	3.886	8.592	0	0	4.021	0
229055	Zbtb10	6.569	6.535	131.514	1.132	0.452	0.413	0.487	0.274	0	0.466	0.323	0.496	0	0	0	0	0	0	0	0	0	1.3	0	0	0	0	0	0	0	0	0	1.046	0	0.957	0	0	0	0	0	0	0	0	0	0	0
229542	Gatad2b	9.198	26.743	22.146	2.504	6.098	6.936	2.187	0.437	0	1.734	0.492	0.395	0	0.494	1.098	0.84	1.611	0.558	2.149	1.864	0.546	0	0.212	0	0	0	4.783	5.855	6.964	6.99	0	7.863	11.869	8.546	8.043	14.655	6.871	10.615	19.991	11.53	4.374	3.798	11.949	12.169	11.689
229615	Pias3	0	0	0	0	0	0	0.423	0	0	0	0.97	0.276	0	0	0	0	0	0	0	0	0.56	0	0	0	0	0	0	0	0.647	0	0	1.864	1.341	0	0	0	0	0	0	0	0	0	0	0	0
229663	Csde1	0	0	0	0	0	0.243	3.948	0	4.45	0	0	0.147	0	0	0	0	0	0	0	0	0	0.61	0	0	0	0.437	0	0	0	0	0.268	0.283	0	5.742	1.691	2.112	0	0.869	2.06	83.864	7.813	2.587	2.576	1.153	2.983
230119	Zbtb5	0	0	0	0	0	0	0	0	0	0	0	0	0	0	0	0	0	0	0	0	0	0	0	0	0	0	0	0	0	0	0	0.216	0	0	0	0	0	0	0	0.345	0	0	0	0	0
230162	Zfp189	0.359	0	0	0	0.216	0	0	0	0.459	7.214	0	0	0	0.562	0	0	0	0	0	0.005	0	0	0	0.011	0.026	0	0.018	0	0	0	0	0	0	0	0.03	0	0.016	0	0.022	0	0.016	0.012	0	0	0
230587	Glis1	0	0	0	0	0	0	0.125	0	0	0	0	0	0	0	0	0	0	0	0	0	0	0	0	0	0	0	0	0	0	0	0	0.136	0	0	0	0	0	0	0	0	0	0	0	0	0
230700	Foxj3	0	6.148	1.984	9.19	32.372	25.778	17.291	34.278	30.659	23.533	39.078	21.345	49.358	55.659	65.853	16.948	48.282	49.926	15.611	27.928	48.286	0	43.453	19.61	7.109	10.191	6.549	16.8	21.865	21.217	34.485	8.214	4.864	7.893	0	7.367	6.066	7.061	10.304	23.732	12.757	24.694	15.389	36.168	0
230761	Zfp362	3.353	9.129	12.423	0.406	3.248	3.026	0.436	0	1.283	0	0	0	0	1.284	3.537	0	1.276	2.918	0	1.16	0	1.39	2.35	2.42	2.198	2.602	2.501	8.204	6.607	6.104	2.751	9.525	5.615	13.004	10.791	14.626	1.826	9.916	1.127	12.603	8.403	3.481	1.12	0	6.252
230848	Zbtb40	0	0	0	0	0	0	0	0	0	0	0	0	0	0	0	0	0	0	0	0	0	0	0	0	0	0	0	0	0	0	0	0	0	0	0	0.219	0	0	0	0	0	0.118	0	0	0
231051	Kmt2c	0.14	1.375	0.936	0.036	0.041	0.263	0.075	0.046	0.281	0.17	0.016	0	0	0.109	0.137	0	0.149	0	0	0.171	0	0.033	0.19	0.112	0.549	0.105	0.104	0.126	0	0.155	0	0	0	0.135	0.163	0.103	0.735	0.19	0.303	0	0	0.136	0.092	0	0
231151	Tada2b	0	2.678	1.827	0	2.087	2.392	1.233	1.326	0.76	0	0	0	1.404	0	0.926	0.903	0.807	0	0.787	0.965	1.817	0	0	0.857	1.233	0	0.768	1.762	0	2.674	2.201	2.332	1.433	2.915	1.734	2.233	1.536	6.137	6.787	3.102	2.468	7.456	5.58	2.554	2.836
231991	Creb5	0	8.466	7.647	0	3.788	0	0	0	0	0	0	0	0	4.243	3.441	0	4.607	5.227	0	2.974	3.301	0	3.08	2.618	0	3.005	3.133	0	0	4.583	0	0	5.915	4.869	0	4.732	6.008	6.412	6.054	0	5.209	5.256	6.039	0	0
232337	Zfp637	2.081	0	0	1.693	0	0	1.009	0	0	0	0	0	0	0	0	0	0	0	0	0	0	0	25.491	37.53	0	0	0.896	1.838	0	1.808	0	2.29	0	0	7.782	6.141	2.501	0	0	43.266	1.18	0.394	0	0	5.972
232784	Zfp212	0	0	0	0	0	0	0	0	0	0	0	0	0	0	0	0	0	0	0	0	0	0	0	0	0	0	0	0	0	0	0	0	0	10.296	0	0	0	0	0	0	8.258	8.21	0	0	0
232854	Zfp418	0	0	0	0	0	0.003	0	0	0	0	0	0	0	0.006	0	0	0	0.032	0	0	0.036	0	0.01	0.017	0	0	0	0	0	0	0	0	0	0.077	0	0	0	0	0	0.164	0	0	0	0	0
232855	Zfp772	7.382	2.174	6.917	3.771	4.462	3.259	2.642	0	1.384	1.055	0	0	0	1.349	1.308	2.403	1.499	2.251	2.816	1.802	1.858	3.149	4.466	3.507	5.505	5.801	5.671	12.455	12.936	15.101	8.254	0	14.423	19.992	17.667	16.877	16.506	16.894	17.001	12.191	13.42	12.609	11.893	12.528	13.011
232878	Zscan22	0	0	0	0	0	0.004	0	0	0	0	0	0	0	0.028	0	0	0	0.043	0	0.007	0.049	0	0.013	0.037	0.033	0	0.023	0	0	0	0	0	0	0.104	0.038	0	0.021	0	0.027	0.221	0.02	0.015	0	0	0
232879	Zbtb45	0	0	0	0.584	0	0	0	0	0	0	0	0	0	0	0	0	0	0	0	0	0	0	0	1.949	3.603	0	2.875	1.039	7.563	10.873	0.962	0.776	164.694	37.837	54.316	30.487	71.313	55.828	66.42	14.455	156.75	107.176	93.101	92.259	75.236
232966	Zfp114	0	0	0	0	0	0.003	0	0	0	0	0	0	0	0.006	0	0	0	0.035	0	0	0.039	0	0.01	0.019	0	0	0	0	0	0	0	0	0	0.085	0	0	0	0	0	0.18	0	0	0	0	0
232976	Zfp574	0	0	0	0	0	0	0	0	0	0	0	0	0	0	0	0	0	0	0	0	0	0	0	0	0	0	0	0	0	0	0	0	2.971	0	0	0	0	0	0	0	0	5.929	4.634	9.84	5.795
233056	Zfp790	0	0	0	0	0	0.003	0	0	0	0	0	0	0	0.005	0	0	0	0.029	0	0	0.033	0	0.009	0.016	0	0	0	0	0	0	0	0	0	0.071	0	0	0	0	0	0.151	0	0	0	0	0
233057	Zfp940	0	0	0	0	0	0	0	0	0	0	0	0	0	0	0	0	0	23.62	0	0	0	0	0	0	0	0	0	0	0	0	0	0	0	0	0	0	0	0	0	0	0	0	0	0	0
233058	Zfp420	0	0	0	0	0	0.006	0	0	0	0	0	0	0	0.011	0	0	0	0.059	0	0	0.067	0	0.018	0.032	0	0	0	0	0	0	0	0	0	0.142	0	0	0	0	0	0.303	0	0	0	0	0
233168	AI987944	0	0	0	0	0	0	0	0	0	0	0	0	0	0.026	0	0	0	0	0	0.009	0	0	0	0.017	0.043	0	0.029	0	0	0	0	0	0	0	0.05	0	0.027	0	0.036	0	0.026	0.019	0	0	0
233410	Zfp592	1.698	0.432	0.576	0.255	0	0	0.805	0	0	0	0	0	0	0	0	0	0	0	0	0.049	0	0	0	0	1.027	1.461	1.297	0	1.168	0	0.915	5.707	2.848	4.193	5.423	5.243	6.81	5.49	5.541	5.128	12.597	5.98	4.295	4.023	4.274
233887	Zfp553	2.83	0	0	0	0	0	0	0	0	0	0	0	0	0	0	0	0	0	0	0	0	0	0	0	0	0	0	0	0	0	0	0	0	0	0	0	0	0	0	0	0	0	0	0	0
233890	Zfp768	0	0	0	0	0	0.004	0	0	0	0	0	0	0	0.007	0	0	0	0.04	0	0	0.045	0	0.012	0.022	0	0	0	0	0	0	0	0	0	0.097	0	0	0	0	0	0.205	0	0	0	0	0
234358	Zfp930	0	0	0	0	0	0.004	0	0	0	0	0	0	0	0.008	0	0	0	0.047	0	0	0.053	0	0.014	0.025	0	0	0	0	0	0	0	0	0	0.113	0	0	0	0	0	0.24	0	0	0	0	0
234725	Zfp612	0	0	0	0	0	0.003	0	0	0	0	0	0	0	0.006	0	0	0	0.034	0	0	0.038	0	0.01	0.018	0	0	0	0	0	0	0	0	0	0.082	0	0	0	0	0	0.174	0	0	0	0	0
235047	Zfp809	0	0	0	0	0	0	0	0	0	0	0	0.779	0	0	0.798	0	0	0	2.561	0	0	0	0	0	0	0	0	0	0	0	0	0	0	0	0	0	0	0	0	0	5.206	6.808	0	0	0
235132	Zbtb44	0	1.404	1.253	0	0	0	0	0	0	0	0	0	0	0	0	0	0	0	0	0	0	0	0	0	0	0	0	0	0	0	0	0	0	0	0	0	3.095	3.546	3.264	2.226	0	0	0	0	0
235134	Nfrkb	28.732	52.776	49.446	18.004	73.045	59.318	17.808	19.97	12.731	0.988	0	0.331	1.586	1.415	1.035	1.494	4.942	13.243	0.453	24.366	0.748	0.183	5.114	31.081	15.367	21.754	14.206	23.461	31.155	26.602	14.456	34.057	98.024	52.91	77.823	50.187	83.242	86.274	107.443	142.454	109.124	95.422	63.826	77.502	85.433
235320	Zbtb16	0	0	0	0	0	0	0	0	0	0	0	0	0	0	0	0	0	0	0	0	0	0	0	0	0	0	0	0	0	0	0	0	0	0	0	0	0	0	0	0	3.667	3.528	0	0	0
235469	Zfp280d	0.068	0	0.467	0.264	0	0.473	2.171	0	0	0	0	0	0	0	0	0	0	0.358	0	0	0	0	0	0	0.341	0	0.306	0	0	0.781	0	0	0	0	0	0	0	0	0	0	0	0	0	0	0
236193	Zfp709	0	0	0	0	0	0.003	0	0	0	0	0	0	0	0.006	0	0	0	0.032	0	0	0.036	0	0.01	0.017	0	0	0	0	0	0	0	0	0	0.077	0	0	0	0	0	0.164	0	0	0	0	0
237339	L3mbtl3	40.875	44.192	34.412	5.001	3.967	3.087	0	0	0	0	0	0	0	0	0	0	0	0	0	0	0	0	0	0	0	0	0	0	0	0	0	0	0	2.042	1.699	1.606	2.759	1.461	3.727	0	0	0	0	0	0
237411	Zfp938	0	0	0	0	0	0.004	0	0	0	0	0	0	0	0.007	0	0	0	0.039	0	0	0.044	0	0.012	0.021	0	0	0	0	0	0	0	0	0	0.093	0	0	0	0	0	0.198	0	0	0	0	0
237758	Zfp454	0	0	0	0	0	0.004	0	0	0	0	0	0	0	0.029	0	0	0	0.045	0	0.007	0.051	0	0.013	0.038	0.034	0	0.024	0	0	0	0	0	0	0.108	0.04	0	0.021	0	0.028	0.23	0.021	0.015	0	0	0
238247	Arid4a	17.128	4.56	4.204	4.904	0	1.301	0.12	0	0	0	0	0.216	1.201	0	0	0	0	0	0	0.904	0	0	0	0	0	0	0	0	0	0	0	0	0	0	0	0	0	0	0	0	0	0	0	0	0
238317	Elmsan1	9.585	19.019	12.56	4.086	5.232	5.397	1.755	0.81	0.546	1.801	0.082	0.851	0.44	0	0	2.65	0.371	0	1.833	0	0	0.949	0	0	0	0	0.424	1.101	1.461	0	0	3.985	4.532	5.906	7.508	6.996	8.954	6.74	7.238	3.707	0	0.249	0	0	0
238673	Zfp367	0	0	0	0	0	0	1.181	0	0	2.973	0	0	0	0	0	0	0	0	0	0	0	0	0	0	0	0	0	0	0	0	0	1.031	0	0	0	0	0	0	0	0	0	0	0	0	0
238690	Zfp458	0	0	0	0	0	0.003	0	0	0	0	0	0	0	0.006	0	0	0	0.033	0	0	0.037	0	0.01	0.018	0	0	0	0	0	0	0	0	0	0.08	0	0	0	0	0	0.169	0	0	0	0	0
238692	Zfp874a	0	0	0	0	0	0.005	0	0	0	0	0	0	0	0.01	0	0	0	0.056	0	0	0.063	0	0.017	0.03	0	0	0	0	0	0	0	0	0	0.135	0	0	0	0	0	0.288	0	0	0	0	0
238693	Zfp58	0	0	0	0	0	0.005	0	0	0	0	0	0	0	0.01	0	0	0	0.053	0	0	0.06	0	0.016	0.029	0	0	0	0	0	0	0	0	0	0.129	0	0	0	0	0	0.274	0	0	0	0	0
238722	Zfp72	0	0	0	0	0	0.006	0	0	0	0	0	0	0	0.011	0	0	0	0.059	0	0	0.067	0	0.018	0.032	0	0	0	0	0	0	0	0	0	0.142	0	0	0	0	0	0.303	0	0	0	0	0
238803	Zfp366	0	0	0	0.344	0	0	0.333	0	0	0	0	0	0	0	0	0	0	0	0.423	0	0	0.827	0	0	0	0	0	0	0	0	2.993	2.373	0	3.372	0	4.1	3.292	0	0	0.842	0	0	0	0	0
239102	Zfhx2	0.586	0.625	0.556	0.214	0	0	0	0.362	0	0.086	0	0.154	0	0.139	0.102	0	0.257	0.184	0.167	0.127	0.384	0.073	0	0.339	0	0	0	0	0	0	0.678	1.072	0	0	0	0.198	0	0	0	0	0	0	0	0	0
239122	Setdb2	0	0	0	0	0	0	0	0	0	0	0	0	0	0	0	0	0	0	0	0	0	0.278	0.347	0.551	0	0	0	0	0	0	0	0	0	0	0	0	0	0	0	0	0	0	0	0	0
239985	Arid1b	0	0.476	0.7	0	0.791	0	0.494	1.168	0.96	0.684	1.135	2.019	1.533	0.794	0.937	0.615	1.058	1.786	0.468	0.136	0.869	0	0	0.178	2.537	0.815	2.089	2.793	2.552	4.433	1.587	2.605	6.879	8.815	3.072	6.975	7.758	4.884	4.061	10.314	4.657	4.142	2.211	2.269	2.563
240034	Zfp760	0	0	0	0	0	0.005	0	0	0.264	0	0	0	0	0.293	0	0	0	0.051	0	0	0.057	0	0.384	0.028	0	0	0.287	0	0.385	0	0	0	0	0.398	0	0	0.224	0	0	0.261	0	0	0	0	0
240041	Zfp945	0	0	0	0	0	0.004	0	0	0	0	0	0	0	0.007	0	0	0	0.039	0	0	0.044	0	0.012	0.021	0	0	0	0	0	0	0	0	0	0.093	0	0	0	0	0	0.198	0	0	0	0	0
240064	Zfp799	0	0	0	0	0	0	0	0	0	0	0	0	0	0	0	0	0	0	0	0	0	0	0	1.117	0	0	0	0	0	0	0	0	0	0	0	0	0	0	0	0	0	0	0	0	0
240068	Zfp563	0	0	0	0	0	0	0	0	0	0	0	0	0	0.025	0	0	0	0	0	0.008	0	0	0	0.017	0.041	0	0.028	0	0	0	0	0	0	0	0.048	0	0.025	0	0.034	0	0.025	0.018	0	0	0
240120	Zfp119b	0	0	0	0	0	0.004	0	0	0	0	0	0	0	0.007	0	0	0	0.041	0	0	0.047	0	0.012	0.022	0	0	0	0	0	0	0	0	0	0.1	0	0	0	0	0	0.213	0	0	0	0	0
240476	Zfp407	0	0	0	0	0.037	0	0	0	0	0.404	0	0	0	0	0.059	0	0	0	0	0	0	0	0	0	0	0	0	0	0	0	0	0	0	0	0	0	0	0.153	0	0	0	0	0	0	0
240869	Zbtb37	0	0.83	0	0	0.437	0.525	0	0	0.657	0	0	0	0.512	0	0	0	0	0	0	0	0	0	0	0	0.679	0	0	0	0	0	0	3.64	0	0	0	0	0	0	0	0	0	0	0	0	0
241066	Carf	0	0	0	0	0	0	0	0	0	0	0	0	0	0	0	0	0	0	0	0	0	0	1.554	0	0	0	0	0	0	0	0.477	0	0	0	0	0	0	0	0	0	0	0	0	0	0
241311	Zbtb34	0.528	1.708	0.969	0	0.866	1.111	0	0	0.62	0	0	0	0.484	0	0	0	0	0	0	0	0	0	0	0	0.641	0	0	0	0.35	0	0	0.775	0	0	0	0	0	0	0	0	0	0	0	0	0
242509	Bnc2	0.901	0.282	0.194	0.056	0	0	0	0	0	0	0	0	0	0	0	0	0	0	0	0	0	0	0	0	0	0	0	0	0	0	0	0	0	0	0	0	0	0	0	0	0	0	0	0	0
242705	E2f2	54.752	75.655	70.635	80.914	124.563	146.579	124.328	164.41	128.466	180.25	236.736	185.028	143.333	221.019	224.873	272.977	175.621	175.46	183.822	101.097	86.573	99.179	78.554	66.272	77.345	47.726	66.854	53.183	46.336	46.728	57.461	49.741	10.894	18.503	17.107	7.776	7.882	15.431	12.598	0	5.959	1.353	4.374	4.45	5.351
242747	Zfp933	0	0	0	0	0	0.005	0	0	0	0	0	0	0	0.009	0	0	0	0.051	0	0	0.057	0	0.015	0.028	0	0	0	0	0	0	0	0	0	0.123	0	0	0	0	0	0.261	0	0	0	0	0
243905	Zfp568	0.552	0.513	0	0	0.977	73.731	0	58.101	110.957	0	0	0	0	0.575	0	0	0	0.039	0	0.133	0.044	0	0.524	0.894	2.533	0.565	0	2.347	1.733	2.942	75.691	149.09	0	0.093	0	0	0	0	0	0.198	0	0	0	0	0
243906	Zfp14	0	0	0	0	0	0.005	0	0	0	0	0	0	0	0.009	0	0	0	0.049	0	0	0.055	0	0.015	0.026	0	0	0	0	0	0	0	0	0	0.118	0	0	0	0	0	0.25	0	0	0	0	0
243937	Zfp536	0	0	0	0	0	0.002	0	0	0	0	0	0	0	0.003	0	0	0	0.018	0	0	0.02	0	0.005	0.01	0	0	0	0	0	0	0	0	0	0.043	0	0	0	0	0	0.091	0	0	0	0	0
243963	Zfp473	0	0	0	0	1.155	2.455	0	0	3.663	0	0	0	0	3.16	2.604	0	0	0	0	0	0	0	0	0	2.104	0	0	0.588	1.054	0.835	0	0	0	0	0	0	0	0	0	0	0	0	0	0	0
244216	Zfp771	4.108	0	0	0	0	0	10.398	4.071	0	1.203	6.103	4.827	12.992	0	0	0	0	0	0	0	0	0	0	0	0	0	3.081	0	0	0	0	5.915	0	0	0	0	0	0	0	0	0	0	0	0	0
244219	Zfp668	0	0	0	0	0	0.733	0	0	0	0	0	0	0	0	0	0	0	0	0	0	0	0	0	0	0	0	0	0	0	0	0	0	0	0	0	0	0	0	0	0	0	0	0	0	0
244579	Tox3	0.398	6.546	6.647	0.645	8.577	10.164	0.893	1.466	1.031	1.571	1.013	1.737	0	6.435	7.5	3.948	9.353	8.154	2.466	7.858	7.86	0.893	10.941	10.325	6.344	6.532	8.1	9.121	0	10.849	1.141	0	2.332	2.161	7.046	2.19	3.105	9.955	2.944	0	1.681	0	16.409	2.928	2.531
245007	Zbtb38	0	0	0	0	0	0	0	0	0	0	0	0	0	0	0	0	0	0	0	0	0	0	0	0	0	0	0	0	0	0	0.301	6.371	0	0	0	0	0	0	0	0	0	6.419	0	0	0
245595	Zfp711	9.64	6.463	4.057	8.663	3.013	3.567	5.15	0	1.707	2.454	0	0	0.126	2.712	2.65	5.145	1.942	1.533	4.778	2.258	2.032	8.841	3.328	5.487	7.756	7.368	7.099	6.14	5.066	5.102	1.994	0	6.356	14.336	10.859	8.081	10.449	10.818	11.25	2.979	11.807	8.164	5.086	4.26	7.487
245671	Klf8	0	0	0	0	0	0.009	0	0	0	0	0	0	0	0.017	0	0	0	0.093	0	0	0.105	0	0.028	0.051	0	0	0	0	0	0	0	0	0	0.225	0	0	0	0	0	0.479	0	0	0	0	0
246086	Onecut3	9.268	12.164	14.586	5.323	7.228	4.662	3.17	7.57	3.173	0.889	13.836	17.399	15.535	4.198	3.787	14.228	12.239	14.731	45.447	41.471	35.072	40.176	30.091	24.924	23.966	21.913	19.671	31.639	37.791	51.692	50.569	39.154	72.633	34.207	37.576	47.949	107.092	101.514	104.204	240.875	87.833	88.819	97.588	100.062	95.375
252838	Tox	0	5.072	4.988	0	7.488	9.036	0	0	0	1.669	0	0	0	6.837	16.564	2.797	8.379	8.663	2.62	6.493	6.609	0	21.579	17.826	6.74	6.94	7.516	9.692	0	11.527	0	0	0	0	14.923	0	0	7.222	0	0	0	0	14.861	0	0
260298	Fev	0	19.388	15.092	0	12.881	18.054	0	0	9.779	0	0	0	0	23.657	21.371	0	28.53	28.851	0	50.468	27.382	0	21.699	38.838	37.958	37.353	34.912	11.91	58.177	55.465	9.738	0	23.59	26.335	27.735	9.783	20.678	4.534	17.232	4.56	11.225	11.19	11.606	21.125	8.313
268469	Zfp652	0	1.376	0.888	0	1.627	7.572	0.759	0	6.084	3.075	0.928	0.808	0.114	15.418	12.911	4.252	12.174	13.784	5.168	2.702	1.184	0.569	0.62	5.553	3.583	0.083	1.172	2.086	4.473	4.215	2.426	10.915	8.903	16.366	16.749	7.353	12.436	7.579	8.751	8.645	13.775	19.436	3.8	0.491	2.271
268670	Zfp759	0	0	0	0	0	0.003	0	0	0	0	0	0	0	0.007	0	0	0	0.036	0	0	0.041	0	0.011	0.02	0	0	0	0	0	0	0	0	0	0.087	0	0	0	0	0	0.186	0	0	0	0	0
268741	Tox4	2.085	26.24	31.713	2.601	26.498	28.538	6.489	11.657	3.869	3.269	1.595	1.476	0	5.47	8.277	3.356	7.95	9.604	2.096	6.68	6.681	0.759	9.299	8.776	12.849	13.42	14.001	15.927	0	17.16	2.066	6.204	19.823	21.374	27.452	24.73	29.408	53.05	29.229	4.36	7.679	4.691	33.791	8.206	29.221
269389	Tox2	0.322	1.435	1.581	0.522	1.238	1.344	0.723	1.187	0.834	0	0.82	1.406	0	0	0	1.065	1.188	0	0	1.414	1.328	0.723	0.93	0.965	0	0	0.831	0	0	0	0.924	0	1.887	1.749	0	1.773	2.514	2.556	2.383	0	1.36	0	1.961	2.371	2.049
269585	Zscan20	0	0	0	0	0	0.002	0	0	0	0	0	0	0	0.004	0	0	0	0.021	0	0	0.023	0	0.006	0.011	0	0	0	0	0	0	0	0	0	0.05	0	0	0	0	0	0.106	0	0	0	0	0
269639	Zfp512	98.953	41.793	39.717	57.578	29.361	32.139	46.392	29.293	22.599	29.076	6.421	4.392	9.893	19.457	27.932	58.501	8.599	12.145	45.77	19.566	21.253	24.688	109.813	99.536	24.754	17.752	20.021	12.093	26.63	26.208	18.461	60.654	68.197	82.016	113.285	98.009	103.875	112.613	80.961	206.376	64.504	53.038	25.411	36.721	27.292
269800	Zfp384	2.93	9.825	9.03	0.407	4.196	4.241	0.304	156.392	1.286	0	0	0	0	1.287	1.919	0	1.278	1.91	0	1.162	0	0.776	2.355	2.425	2.203	7.018	7.205	13.836	13.317	12.036	21.306	660.427	11.126	30.264	21.016	33.522	13.856	20.251	14.595	27.718	19.979	18.919	8.583	4.997	15.159
270210	Zfp651	0	0	0	0	1.487	6.402	0.439	0	5.562	2.811	0.848	0.316	0.104	11.558	8.556	3.319	9.109	10.935	3.557	2.471	1.083	0.52	0.567	4.194	3.276	0.076	1.072	1.907	4.09	3.854	0.59	1.873	4.229	13.558	5.102	2.614	3.818	0.789	4.635	1.001	8.803	12.083	3.474	0	2.076
272322	Arntl2	0	0	0	0	0	0	0	0	0	0	0	0	0	0	0	0	0	0	0	0	0	0	0	0	0	0	0	0	0	0	0	0	0	0	0	1.993	0	0	0	0	0	0	0	0	0
272382	Spib	0	0	0	0	0	0	0	0	0	0	0	0	0.305	0	0	0	0	0	0	0	3.071	0	28.835	16.964	0	0	0	0	0	0	0	0	0	0	0	0	0	0	0	0	0	0	0	0	0
319475	Zfp672	0	0	0	0.39	0	0	0	0.509	0	0	0	0	0	0	0	0	0	0	0	0	0	0	0	0	0	0	0	0	0	0	0	0	0	0	0	0	0	0	0	0	0	0	0	0	0
319535	Zfp182	0	0	0	0	0	0	0	0	0	0	0	0	0	0	0	0	0	0	0	0	0	0	0	0	0.371	0	0	0	0.514	0	0	0	0	0	0	0	0	0	0	0	0	0	0	0	0
319601	Zfp653	0	0	0	0	0	0	0	0	0	0	0	0	0	0	0	1.628	0	0	0	0	0	0	0	0	0	0	0	0	0	0	0	0	0	0	0	0	0	0	0	0	0	0	0	0	0
319615	Zfp944	0	0	0	0	0	0.007	0	0	0	0	0	0	0	0.013	0	0	0	0.07	0	0	0.079	0	0.021	0.038	0	0	0	0	0	0	0	0	0	0.169	0	0	0	0	0	0.359	0	0	0	0	0
319748	Zfp865	1.283	4.482	3.932	1.517	0	0	1.093	1.945	0.608	1.062	0	0	2.253	0	0	0	0	0	0	0	0	0	0.55	0	0.369	0.544	0.575	0	0	0	1.035	0.302	0	0.587	0	2.49	0	0	1.936	1.148	0	0.329	0	0	0
319758	Rfx7	1.507	1.066	1.712	2.271	1.978	1.33	2.204	1.47	1.143	0	0.743	1.03	1.093	0.378	0.749	0.774	0.221	0	0.302	0	0.73	0	0	0	0	0	0	0	0	0	0.93	1.64	0	0	0	0	0	0	0	1.104	0	0	0	0	0
320394	Cenpt	1.421	0	0	1.269	0	0	5.506	1.874	0	0.534	4.406	5.502	1.737	0	0	0	0	0	0.798	0	0	0.369	0	0	0	0	0	0	0	0	1.287	0.957	0	0	0	2.935	0	0	0	0	0	0	0	0	0
320683	Zfp629	0.16	0	0	0.275	0	0.002	0.69	0.266	0	1.293	0.18	0.17	0.507	0.769	0.523	2.407	0.696	1.761	0	1.157	1.111	0.771	3.972	3.793	0	0	0	0	0	0	0.489	1.87	0	0.753	0	0.713	0	0	0	0.134	0	0	0	0	0
320713	Mysm1	0	0	0	0	1.314	1.599	0	0	2.96	0	0	0	9.938	0	3.605	2.257	4.203	4.014	2.169	4.28	3.979	1.729	3.969	3.831	0	0	0	0	0	0	0	0	0	0	0	0	0	0	0	0	0	0	0	0	0
320799	Zhx3	0	0	0	0	0	0	0	0	0	0	0	0	0	0	0	0	0	0	0	0	0	4.226	0	0	0	0	0	0	0	0	0	0.219	44.382	14.301	20.262	13.02	41.867	15.965	25.089	100.665	37.532	33.734	6.305	24.519	19.092
328977	Zfp532	0	0	0.069	0	0	0	0	0	0	0	0	0	0	0	0	0	0	0	0	0	0	0	0	0	0	0	0	0	0	0	0	0	0	0	0	0	0	0	0	0	0	0	0	0	0
329002	Zfp236	4.834	1.496	2.06	0.863	1.704	1.698	0.417	1.969	0	0.141	0.488	1.012	1.335	0.266	0.339	1.834	0.54	0.909	0.32	0	0.024	0.51	0.253	0.584	0.625	0.209	0.339	0.333	1.324	1.025	0	2.036	0	1.187	1.782	0.64	0.822	0.948	1.413	0.109	0.679	0.386	1.009	0.833	0
329003	Zfp516	0	0.216	0.056	0	0	0	0	0	0	0	0	0	0	0	0	0	0	0	0	0	0	0	0	0	0	0	0	0	0	0	0	0	0	0	0	0	0	0	0	0	0	0	0	0	0
329575	Gm14325	0	0	0	0	0	0	0	0.184	0	0	0	0	0	0	0	0	0	0	0	0	0	0	0	0	0	0	0	0	0	0	0	0	0	0	0	0	0	0	0	0	0	0	0	0	0
329934	Foxo6	0	1.348	0	0	2.685	3.058	0	6.932	2.995	5.967	8.952	8.727	7.392	7.137	11.105	8.32	10.13	12.072	19.38	17.699	16.355	7.199	18.913	16.689	12.592	0	0	16.621	0	0	17.576	20.937	0.578	0	24.851	0	19.848	15.609	20.481	56.285	31.576	11.887	0	0	0
330463	Zfp78	0	0	0	0	0	0.005	0	0	0	0	0	0	0	0.009	0	0	0	0.049	0	0	0.055	0	0.015	0.026	0	0	0	0	0	0	0	0	0	0.118	0	0	0	0	0	0.251	0	0	0	0	0
338354	Zfp780b	0	0	0	0	0	0	0	0	0	0	0	0	0	0	0	0	0	0	0	0	0	0	0	0	0	0	0	0	0	0	0	2.954	0	0	0	0	0	0	0	0	0	0	0	0	0
353187	Nr1d2	0	0	0	0	0	0	0	0	0	0	0	0	0	0	0	0	0	0	0	0	0	0	0.174	0	0	0	0	0	0	0	0	0	0	0	0	0	0	0	0	0	0	0	0	0	0
378435	Mafa	0	0	0	0	0	0	0	0	0	0	0	0	0	0	0	0	0	0	0	0	0	0	0	0	0	0	0	0	3.027	0	1.917	0	4.444	0	0	0	5.164	0	0	7.042	0	0	0	0	0
380669	Lin28b	0	0	0	0	1.338	1.836	0.724	0	3.566	0	0	0	0	0	1.643	0	6.063	2.154	0	0	0	0	0	0	0	0	0	0	0	0	0	0	0	0	0	0	0	0	0	0	0	0	0	0	0
380850	Gm5141	0	0	0	0	0	0.006	0	0	0	0	0	0	0	0.011	0	0	0	0.062	0	0	0.07	0	0.019	0.034	0	0	0	0	0	0	0	0	0	0.15	0	0	0	0	0	0.319	0	0	0	0	0
380912	Zfp395	1.255	6.991	8.75	1.16	1.785	0	1.304	0	0	1.755	0	0	0	0	0	11.524	0	0	5.295	0	0	0	0	0	0	0	0	0	0	0	1.321	0	0	0	0	7.413	3.488	2.668	0	2.718	0	0	0	0	0
381066	Zfp948	0	0	0	0	0	0.003	0	0	0	0	0	0	0	0.006	0	0	0	0.034	0	0	0.038	0	0.01	0.018	0	0	0	0	0	0	0	0	0	0.082	0	0	0	0	0	0.174	0	0	0	0	0
381067	Zfp229	0	0	0	0	0	0.004	0	0	0.2	0	0	0	0	0.222	0	0	0	0.039	0	0	0.044	0	0.292	0.021	0	0	0.217	0	0.292	0	0	0	0	0.302	0	0	0.17	0	0	0.198	0	0	0	0	0
381549	Zfp69	0	0	0	0	0	0.004	0	0	0	0	0	0	0	0.007	0	0	0	0.04	0	0	0.045	0	0.012	0.022	0	0	0	0	0	0	0	0	0	0.097	0	0	0	0	0	0.205	0	0	0	0	0
382066	Prdm10	19.063	13.509	15.318	13.327	13.785	14.707	14.403	17.73	14.321	7.223	10.77	17.934	22.195	15.624	11.104	15.082	7.829	9.094	2.335	7.102	3.649	5.546	4.825	6.051	2.232	1.34	4.24	1.088	2.923	3.238	2.926	9.934	0	3.512	6.041	5.582	8.257	6.953	8.125	1.09	4.956	10.785	1.252	5.829	0
383491	Prdm14	0	0	0	0	0	0	0	0	0	0	0	0	9.204	0	0	0	0	0	0	0	0	0	0	0	0	0	0	0	0	0	0	0	0	0	0	0	0	0	0	0	0	0	0	0	0
387609	Zhx2	0	0	0	0	0	0	0	0	0	0	0	0	0	0	0	0	0	0	0	0	0	0	0	0	0	0	0	0	0	0	0	0.676	139.76	17.617	19.695	26.565	83.077	93.98	96.082	117.223	183.531	146.248	99.847	95.683	105.354
407812	Zfp941	0	0	0	0	0	0	0	0	0.153	0	0	0	0	0.164	0	0	0	0	0	0	0	0	0.214	0	0	0	0.166	0	0.223	0	0	0	0	0.159	0	0	0.13	0	0	0	0	0	0	0	0
407823	Baz2b	41.012	42.128	36.906	27.615	21.39	16.852	22.961	14.547	9.991	7.753	8.659	11.522	7.118	15.374	18.409	11.175	7.132	8.373	13.794	19.338	22.537	27.903	26.029	18.718	26.095	24.133	26.186	15.167	11.882	25.245	24.744	17.366	1.607	5.71	11.581	10.506	16.703	17.211	19.377	11.162	24.578	3.407	3.571	4.304	2.771
408067	Zfp874b	0	0	0	0	0	0.005	0	0	0	0	0	0	0	0.009	0	0	0	0.049	0	0	0.055	0	0.015	0.026	0	0	0	0	0	0	0	0	0	0.118	0	0	0	0	0	0.25	0	0	0	0	0
408068	Zfp738	0	0	0	0	1.419	3.02	0	0	4.5	0	0	0	0	3.889	3.199	0	0	0.032	0	0	0.036	0	0.01	0.017	2.584	0	0	0.723	1.295	1.026	0	0	0	0.077	0	0	0	0	0	0.164	0	0	0	0	0
431706	Zfp457	0	0	0	0	0	0.004	0	0	0	0	0	0	0	0.007	0	0	0	0.041	0	0	0.047	0	0.012	0.022	0	0	0	0	0	0	0	0	0	0.1	0	0	0	0	0	0.213	0	0	0	0	0
432731	Zscan26	6.936	1.72	1.482	1.367	0	2.01	0.676	0.775	0.323	0	0	0	0	0.347	0	0	0	0	0	0	0	0	0.451	1.463	2.627	0	3.057	3.075	4.677	3.966	1.967	0.68	0	5.644	0	5.989	4.505	4.638	4.749	0	3.58	3.458	0	0	0
432769	Zfp708	0	0	0	0	0	0.005	0	0	0	0	0	0	0	0.009	0	0	0	0.051	0	0	0.058	0	0.015	0.028	0	0	0	0	0	0	0	0	0	0.123	0	0	0	0	0	0.262	0	0	0	0	0
432770	Rslcan18	0	0	0	0	0	0.006	0	0	0	0	0	0	0	0.011	0	0	0	0.059	0	0	0.067	0	0.018	0.032	0	0	0	0	0	0	0	0	0	0.142	0	0	0	0	0	0.303	0	0	0	0	0
433801	Gm13212	0	0	0	0	0	0.008	0	0	0.223	0	0	0	0	0.014	0	0	0	0.08	0	0	0.09	0	0.024	0.043	0	0	0	0	0	0	0	0	0	0.193	0	0	0	0	0	0.411	0	0	0	0	0
434484	Sp140	0	0	0	0	0	0	0	0	0	0	0	0.141	0	0	0	0	0	0	0	0	0	0	0	0	0	0	0	0	0	0	0	0	0	0	0	0	0	0	0	0	0	0	0	0	0
449000	Zfp960	0	0	0	0	0	0.005	0	0	0	0	0	0	0	0.009	0	0	0	0.048	0	0	0.054	0	0.014	0.026	0	0	0	0	0	0	0	0	0	0.116	0	0	0	0	0	0.246	0	0	0	0	0
544922	Zkscan4	0	0	0	0	0	0	0	0	0	0	0	0	0	0	0	0	0	0	0	0	0	0	0	0	0	0	0	0	0	0	0	0	0	0	0	0	0	0	0.342	0	0	0.449	0	0	0
545471	Zfp345	0	0	0	0	0	0.004	0	0	0	0	0	0	0	0.008	0	0	0	0.043	0	0	0.049	0	0.013	0.023	0	0	0	0	0	0	0	0	0	0.104	0	0	0	0	0	0.221	0	0	0	0	0
550619	Arid3c	0.844	2.667	2.351	1.251	1.409	1.588	0	5.168	2.105	2.328	5.706	0.918	3.718	4.938	5.462	2.745	6.717	6.665	4.329	6.273	5.618	2.884	3.557	4.647	0	2.712	0.639	1.175	0	0	0.525	0.934	0	0	0	0	0	0	0	0	0	0	0	0	0
619310	Zfp872	0	0	0	0	0	0.006	0	0	0	0	0	0	0	0.011	0	0	0	0.062	0	0	0.07	0	0.019	0.034	0	0	0	0	0	0	0	0	0	0.15	0	0	0	0	0	0.319	0	0	0	0	0
620419	Zfp963	0	0	0	0	0	0.006	0	0	0	0	0	0	0	0.011	0	0	0	0.059	0	0	0.067	0	0.018	0.032	0	0	0	0	0	0	0	0	0	0.142	0	0	0	0	0	0.303	0	0	0	0	0
626802	Gm14322	0	0	0	0	0	0	0	0.216	0	0	0	0	0	0	0	0	0	0	0	0	0	0	0	0	0	0	0	0	0	0	0	0	0	0	0	0	0	0	0	0	0	0	0	0	0
626832	Gm6710	0	0	0	0	0	0	0	0.175	0	0	0	0	0	0	0	0	0	0	0	0	0	0	0	0	0	0	0	0	0	0	0	0	0	0	0	0	0	0	0	0	0	0	0	0	0
627049	Zfp800	6.699	11.111	8.332	33.416	28.373	35.837	24.669	34.082	31.08	7.268	0.672	3.598	20.451	21.889	24.801	12.807	5.57	12.095	3.515	21.451	14.8	15.347	16.626	5.104	24.421	20.335	30.697	26.58	34.801	9.2	13.389	43.176	22.203	6.956	33.687	32.037	21.923	26.543	28.591	5.674	30.44	13.16	30.228	27.743	31.597
628359	Gm6871	0	0	0	0	0	0.003	0	0	0	0	0	0	0	0.007	0	0	0	0.037	0	0	0.041	0	0.011	0.02	0	0	0	0	0	0	0	0	0	0.089	0	0	0	0	0	0.189	0	0	0	0	0
630579	Zfp808	0	0	0	0	0	0.004	0	0	0.242	0	0	0	0	0.268	0	0	0	0.047	0	0	0.053	0	0.352	0.025	0	0	0.263	0	0.353	0	0	0	0	0.365	0	0	0.205	0	0	0.24	0	0	0	0	0
664799	Ctcfl	0	12.875	6.277	0	0	0.989	0	0.673	9.803	0	0.426	0	0	26.597	20.767	0	0.898	0	0	8.691	8.782	0	15.421	13.386	0.409	0	0	0	11.857	13.677	0	0	0	0	0	19.699	22.498	7.13	0	9.803	19.207	19.764	0	0	9.654
665001	Gm14391	0	0	0	0	0	0	0	0.175	0	0	0	0	0	0	0	0	0	0	0	0	0	0	0	0	0	0	0	0	0	0	0	0	0	0	0	0	0	0	0	0	0	0	0	0	0
665211	Gm14326	0	0	0	0	0	0	0	0.16	0	0	0	0	0	0	0	0	0	0	0	0	0	0	0	0	0	0	0	0	0	0	0	0	0	0	0	0	0	0	0	0	0	0	0	0	0
667666	Zfp600	0.037	0	0	0	0	0.005	0.054	0	0.038	0	0	0	0.045	0.01	0	0	0	0.053	0	0	0.06	0	0.016	0.029	0	0	0	0	0	0	0	0	0	0.129	0	0	0	0	0	0.274	0	0	0	0	0
100009600	Zglp1	0	0	0	0	0	0	0	0	0	0	0	0	0	0	0	0	0	35.951	0	0	0	0	0	0	0	0	0	0	0	0	0	0	0	0	0	0	0	0	0	0	0	0	0	0	0
100041581	Zkscan16	0	0	0	0	0	0.003	0	0	0	0	0	0	0	0.005	0	0	0	0.03	0	0	0.034	0	0.009	0.016	0	0	0	0	0	0	0	0	0	0.073	0	0	0	0	0	0.155	0	0	0	0	0
100041979	Gm3604	0	0	0	0	0	0.006	0	0	0	0	0	0	0	0.012	0	0	0	0.066	0	0	0.074	0	0.02	0.036	0	0	0	0	0	0	0	0	0	0.159	0	0	0	0	0	0.338	0	0	0	0	0
100043034	Rex2	0.039	0	0	0	0	0.006	0.056	0	0.04	0	0	0	0.048	0.012	0	0	0	0.068	0	0	0.077	0	0.02	0.037	0	0	0	0	0	0	0	0	0	0.164	0	0	0	0	0	0.349	0	0	0	0	0
100044193	Gm20939	0	0	0	0	0	0.006	0.236	0	0	0	0	0	0	0.011	0	0	0	0.059	0	0	0.067	0	0.018	0.032	0	0	0	0	0	0	0	0	0	0.142	0	0	0	0	0	0.303	0	0	0	0	0
100073351	Yy2	25.836	49.661	43.145	61.999	73.52	161.757	67.146	3.619	76.85	122.461	8.488	33.803	53.2	117.895	116.039	180.58	61.801	119.976	135.775	81.983	27.519	66.354	57.495	45.882	95.816	84.093	82.225	106.475	118.061	120.23	80.392	0	151.022	107.377	116.278	48.371	117.968	113.935	116.066	177.891	130.393	130.317	121.106	127.599	120.068
100216455	Gm14124	0	0	0	0	0	0.003	0	0	0	0	0	0	0	0.007	0	0	0	0.036	0	0	0.041	0	0.011	0.02	0	0	0	0	0	0	0	0	0	0.087	0	0	0	0	0	0.186	0	0	0	0	0
100271882	Gm14139	0	0	0	0	0	0.004	0	0	0	0	0	0	0	0.008	0	0	0	0.043	0	0	0.049	0	0.013	0.023	0	0	0	0	0	0	0	0	0	0.104	0	0	0	0	0	0.221	0	0	0	0	0
100503584	Zfp534	0	0	0	0	0	0.008	0	0	0	0	0	0	0	0.016	0	0	0	0.088	0	0	0.099	0	0.026	0.048	0	0	0	0	0	0	0	0	0	0.212	0	0	0	0	0	0.452	0	0	0	0	0

## Sheet: Sheet2
Gene.ID	GeneSymbol	E12.5 R1	E12.5 R2	E12.5 R3	E13.5 R1	E13.5 R2	E13.5 R3	E14.5 R1	E14.5 R2	E14.5 R3	E15.5 R1	E15.5 R2	E15.5 R3	E16.5 R1	E16.5 R2	E16.5 R3	E17.5 R1	E17.5 R2	E17.5 R3	E18.5 R1	E18.5 R2	E18.5 R3	D1 R1	D1 R2	D1 R3	D3 R1	D3 R2	D3 R3	D5 R1	D5 R2	D5 R3	W1 R1	W1 R2	W1 R3	W2 R1	W2 R2	W2 R3	W3 R1	W3 R2	W3 R3	W6 R1	W6 R2	W6 R3	W8 R1	W8 R2	W8 R3
11538	Adnp	1.054	1.743	1.797	0.862	2.318	1.355	0.862	0	0	0	0	0	0	0	0	0	0	0	0	0	0	0	0	0	0	0	0	0	1.688	1.571	0	0.62	0	0	0	1.992	0	0	1.845	0	0	0	0	0	0
11819	Nr2f2	404.83	327.956	452.521	166.853	177.932	193.482	131.969	202.264	77.246	42.133	72.855	51.813	119.852	87.129	62.29	89.726	92.52	108.249	52.924	25.529	24.766	76.852	77.355	45.941	76.525	65.741	58.251	78.691	81.901	84.995	229.591	193.806	214.629	254.839	253.876	244.789	337.696	325.709	378.884	395.632	208.604	193.271	155.275	194.172	171.941
11863	Arnt	12.533	14.639	21.205	13.128	23.897	20.54	15.703	64.9	22.94	26.418	78.025	74.537	107.464	58.831	49.933	73.068	57.972	58.306	46.284	36.097	24.239	0	0	0	0	5.597	9.946	15.636	9.484	18.079	10.831	12.191	0	0	0	0	0	3.519	1.958	0	0	0	2.089	0	0
11865	Arntl	1.433	6.259	9.934	8.711	27.359	12.164	13.18	11.019	29.714	6.411	9.288	12.59	21.069	26.623	14.26	33.207	362.368	454.65	50.645	339.872	128.279	88.306	324.803	262.138	24.599	8.299	8.396	29.218	20.28	29.824	69.91	55.552	1448.47	132.838	55.667	106.634	191.324	174.694	182.477	420.115	276.997	640.465	1541.02	303.948	396.854
11906	Zfhx3	7.949	3.228	2.671	3.396	0.514	8.4	0.318	2.451	0.342	0.677	1.212	1.255	3.94	0.972	0.602	0	0.786	0.652	0.913	0.544	0.298	1.614	0.33	0.264	0.6	0.274	0.389	0.28	0.464	1.042	5.502	4.026	2.112	2.495	1.276	3.044	4.064	1.829	2.095	9.526	1.143	0.72	12.361	0.67	1.205
11908	Atf1	591.397	0	0	131.54	0	0	0	11.848	0	0	0	0	0	0	0	0	0	0	0	0	0	0	0	0	0	0	0	0	0	0	0	0	0	0	0	0	0	0	0	30.396	70.055	0	0	0	0
12013	Bach1	0	0	0	0	0	0	0	0	0	0	0	0.765	0	0	0	0	0	0	0	0	0	0	0	0	0	0	0	0	0	0	0	0	0	0	0	0	0	0	0	0	0	0	0	0	0
12053	Bcl6	0	0	0	0	0	0	0	0	0	0	0	0	0	0	0	0	0	0	0	0	0	0	0	0	0	0	0	0	0	0	0	0	53.608	0	0	0	0	11.044	0	33.783	16.261	34.268	0	14.072	0.598
12355	Nr1i3	0	0	0	0	0	0	0	0	0	0	0	0	0	0	0	0	0	0	0	0	0	9.495	0	0	0	0	0	0	0	0	8.558	0	0	0	0	0	0	0	0	18.185	0	0	0	0	0
12387	Ctnnb1	0	0	0	0	0	0	0	0	0	0	0	0	0	0	0	13.319	0	4.038	7.568	6.433	1.163	0	2.695	1.64	4.946	6.911	2.031	26.506	9.747	27.65	9.255	15.36	49.351	69.22	49.869	43.29	48.805	48.315	40.414	81.785	41.811	40.854	49.654	69.579	42.499
12393	Runx2	0	0	0	0	0	1.6	0	6.724	0	3.295	0	0	0	2.169	0	0	0	0	0	3.318	1.818	1.625	1.719	0	0	0	0	0	0	0	0	0	0	0	0	0	0	0	0	0	0	0	0	0	0
12394	Runx1	90.628	106.849	89.409	39.501	44.789	51.72	35.867	51.202	49.263	17.886	26.218	25.684	27.988	31.874	34.486	29.354	27.691	38.254	29.579	62.157	45.984	28.096	42.421	29.986	38.021	37.832	28.757	28.067	17.011	25.363	40.341	110.336	0	0	0	0	0	0	0	0	0	0	0	0	0
12399	Runx3	8.425	0	0	9.359	10.68	11.323	17.145	26.544	11.354	0	0	0	13.878	11.309	10.779	0	12.475	0	7.223	13.193	14.575	10.749	17.135	14.089	15.706	0	10.465	0	0	20.848	19.183	1.768	0	0	0	0	0	0	0	0	0	0	0	0	0
12400	Cbfb	48.831	0	0	63.782	0	47.929	72.734	178.051	0	64.132	151.909	90.382	99.607	73.532	89.065	94.009	91.293	72.62	120.989	98.077	117.355	79.357	69.502	48.301	49.777	42.226	0	52.886	0	0	83.298	101.719	0	0	0	0	0	0	0	0	0	0	0	0	0
12606	Cebpa	167.855	50.014	46.658	102.627	0	0	87.676	112.255	26.19	0	93.84	46.681	90.115	0	0	134.884	62.135	82.778	279.536	199.373	75.474	339.411	38.192	31.643	158.54	133.261	158.228	227.307	244.338	219.521	163.257	276.284	0	195.552	355.226	336.106	477.289	363.569	278.698	533.356	196.154	0	141.2	149.764	192.6
12607	Cebpz	3.2	5.828	4.921	0	6.121	3.427	4.038	16.374	4.576	0	2.204	2.742	9.753	6.276	1.699	6.539	5.145	3.648	8.082	4.188	5.88	1.481	4.87	5.314	2.536	0.861	2.625	1.123	1.744	0	9.373	45.453	0	0	0	0	1.381	0	2.891	6.637	1.537	1.719	2.19	1.57	1.405
12608	Cebpb	0	0	0	0	0	0	0	0	0	0	0	0	0	0	0	0	0	0	0	0	0	52.608	0	0	0	0	0	0	0	0	0	0	0	139.535	0	103.321	190.25	194.041	160.508	449.083	110.411	102.753	139.94	152.669	0
12611	Cebpg	0	54.187	0	0	0	0	0	0	0	0	0	0	0	0	0	0	0	0	0	0	0	0	0	0	32.823	65.57	0	0	0	0	0	0	78.919	0	0	0	0	202.87	0	0	0	70.126	0	0	0
12615	Cenpa	0	0	0	0	0	0	0	0	0	0	0	0	0	0	7.694	0	0	0	0	0	0	0	0	0	0	0	0	0	0	0	0	0	0	0	0	0	0	0	0	0	0	0	0	0	0
12753	Clock	1.335	1.956	1.597	5.828	2.618	4.699	7.024	13.758	4.831	5.397	11.403	11.67	28.881	15.737	14.986	23.298	15.641	17.405	40.313	18.511	15.015	57.88	22.754	23.393	18.626	11.185	16.36	29.382	26.537	31.27	47.682	753.266	193.384	53.364	64.599	48.334	108.381	113.212	111.004	293.906	143.294	148.991	174.684	174.735	178.746
12912	Creb1	861.358	264.952	226.679	258.228	60.822	0	110.177	62.813	0	74.318	0	0	0	0	0	0	0	0	0	59.709	0	0	0	58.689	0	51.143	55.332	69.89	82.802	77.946	78.992	0	153.861	109.303	119.761	0	0	131.349	187.207	206.596	94.896	78.822	98.644	163.842	151.799
13018	Ctcf	211.646	157.242	176.261	155.236	189.257	174.172	128.596	101.929	177.413	72.019	42.291	21.276	97.207	134.668	161.05	120.798	74.74	91.654	101.014	56.828	21.796	58.832	52.92	67.772	69.43	102.977	80.795	122.805	121.677	154.277	0	53.444	101.408	201.508	89.933	293.949	170.182	263.095	259.616	110.21	152.337	150.791	231.218	336.522	266.362
13047	Cux1	13.516	53.882	41.807	0	1.595	1.416	0	0	0	0	0	0	0	0	0	0	0	0	0	0	0	0	0	0	0	0	0	0	0	0	0	0.874	0	1.098	0.656	1.646	1.302	0	0	1.254	0	0	0	0	0
13418	Dnajc1	0	0	0	0	0	0	0	0	0	1.979	0	0	0	0.703	0	7.692	0	0	4.57	0	0	0	0	0	0	0	0	0	2.777	0	0	8.871	0	2.565	0	0	0	0	0	3.068	0	0	29.93	31.062	0
13496	Arid3a	6.083	21.685	21.538	6.365	7.209	7.078	4.128	6.525	4.278	4.064	8.378	10.546	14.674	0	7.102	5.772	4.59	10.08	6.377	0	7.2	3.896	4.895	5.705	2.308	2.985	1.966	0	4.681	5.478	1.297	0	0	0	0	0	0	0	0	0	0	0	0	0	0
13555	E2f1	0	0	0	0	0	0	0	0	0	2.379	0	0	13.979	0	0	0	0	0	0	0	0	0	0	0	0	0	0	0	0	0	0	3.359	0	0	0	0	0	0	0	0	0	0	0	0	0
13557	E2f3	61.437	76.904	71.117	41.396	80.937	71.062	51.932	85.035	47.833	49.516	86.493	55.657	46.293	70.163	52.869	92.289	58.583	60.663	80.327	69.775	62.78	44.322	49.906	40.164	43.452	19.427	43.422	95.545	112.223	92.073	104.339	99.84	31.127	46.81	78.641	42.338	39.747	43.139	34.469	58.817	19.719	23.132	15.195	16.556	18.828
13559	E2f5	25.851	22.845	0	28.376	0	74.461	31.408	24.878	0	0	0	30.167	0	0	0	0	0	0	0	0	0	0	0	0	0	0	0	0	0	0	0	0	0	0	0	0	0	0	0	0	0	0	0	0	0
13560	E4f1	33.105	0	0	3.629	15.568	17.004	0	0	0	0	0	0	0	0	0	0	0	0	0	0	0	0	0	0	0	0	0	0	0	0	0	0	0	0	0	0	0	0	0	0	0	0	0	0	0
13653	Egr1	0	0	0	0	0	0	0	0	0	0	0	0	0	0	0	0	0	0	0	0	0	0	0	0	8.638	7.14	8.959	9.847	11.992	12.456	11.483	0	4.081	0	1.296	9.664	11.692	0	0	7.264	0	0	0	0	0
13709	Elf1	110.156	103.85	90.105	70.26	29.858	27.419	101.322	126.496	51.023	41.184	66.37	54.968	74.14	34.185	33.425	56.796	20.272	29.383	79.944	35.53	32.75	136.319	23.194	35.084	0	0	0	0	0	0	17.466	69.635	0	0	13.316	0	14.238	18.955	22.016	17.345	0	11.634	12.657	12.639	0
13712	Elk1	5.356	0	0	0	0	0	0	0	0	0	0	0	0	0	0	0	0	0	0	0	0	0	0	0	0	0	0	0	0	0	0	0	0	0	0	0	0	0	0	0	0	0	0	0	0
13713	Elk3	23.169	0	23.342	0	0	0	0	0	0	0	0	0	0	0	0	0	0	0	0	0	0	0	0	0	14.135	16.34	15.153	20.332	24.029	24.312	41.243	24.996	0	22.317	28.473	0	21.465	17.903	24.856	0	9.988	0	10.062	11.627	4.987
13714	Elk4	0	12.746	16.591	0	0	12.57	0	0	0	0	0	10.407	0	8.238	5.403	0	11.319	8.052	0	14.413	35.332	0	26.704	0	25.405	26.002	21.74	0	30.793	34.878	55.503	55.846	35.851	68.379	67.744	36.674	83.712	32.948	49.356	56.405	39.047	34.171	63.068	59.067	62.335
13819	Epas1	0	0	0	0	0	0	0	0	0	0	0	0	0	0	0	0	1.904	0	0	0	0	0	0	0	0	0	0	0	0	0	0	0	0	0	0	0	0	0	0	261.86	0	0	0	0	0
13864	Nr2f6	21.005	46.303	43.167	0	28.231	29.995	10.676	30.872	19	0	12.604	7.469	28.986	19.878	11.853	45.17	28.866	32.028	0	0	0	0	9.862	8.119	16.104	0	13.36	0	0	0	115.373	80.18	193.096	116.606	75.568	94.512	209.314	182.42	239.356	346.89	234.944	203.178	195.807	245.535	235.272
13865	Nr2f1	92.821	155.578	139.325	48.218	70.073	75.196	40.849	93.328	36.749	14.64	0	21.81	51.714	28.669	24.715	0	35.615	38.126	0	11.636	0	28.362	20.689	17.357	0	0	0	0	0	0	55.763	104.353	0	109.701	0	0	153.876	151.959	167.668	0	0	0	0	0	0
13875	Erf	5.227	7.846	8.488	2.009	0	0	0	0	0	0	0	0	0	3.563	0	0	2.539	0	0	0	3.268	0	7.657	0	1.522	9.555	8.178	0	0	0	0	26.197	0	6.803	9.908	0	0	0	7.407	49.455	9.384	11.532	0	4.477	0
13876	Erg	50.08	63.405	71.982	49.202	36.147	60.869	26.244	16.445	63.774	31.774	47.204	89.009	47.988	105.679	53.522	65.808	62.336	102.888	108.503	97.852	35.081	42.007	162.712	100.574	121.654	84.45	73.855	98.824	111.956	111.789	156.647	205.382	25.553	92.766	66.206	116.665	39.779	78.915	53.457	53.579	48.799	46.141	27.364	74.76	20.651
14011	Etv6	105.808	85.333	54.745	4.154	1.874	0	0	0	0	0	0	2.106	0	0	0	0	0	0	0	0	0	0	0	0	0	0	0	0	0	0	0	0	0	0	0	0	8.354	0	0	49.421	0	0	0	0	0
14025	Bcl11a	10.052	12.193	14.741	9.362	7.728	9.134	6.043	14.977	6.064	0	0	0	0	0	0	0	0	0	0	0	0	0	0	0	0	0	0	0	0	0	0	0	0	0	0	0	0	0	0	0	0	0	0	0	0
14234	Foxc2	0	7.839	0	0	0	0	0	0	0	0	0	0	0	0	0	0	0	0	0	0	0	0	0	0	0	0	0	0	0	0	0	0	0	0	0	0	0	0	0	0	0	0	0	0	0
14236	Foxn2	0	0	0	0	0	0	0	2.408	0	0	0	0	0	0	4.049	0	0	0	0	0	0	0	0	0	0	0	0	0	0	0	0	0	0	0	0	0	0	0	0	0	0	0	0	0	0
14247	Fli1	119.255	100.995	102.033	70.006	54.933	84.473	51.207	194.013	37.944	44.577	63.975	60.379	61.318	76.265	66.142	84.143	62.602	66.119	46.083	127.595	59.979	83.086	99.189	84.294	63.49	58.309	91.881	119.322	84.231	81.598	84.528	105.966	0	0	13.165	34.36	9.306	0	0	24.291	0	0	0	0	0
14390	Gabpa	352.361	559.685	499.05	402.32	427.337	448.561	351.966	436.732	235.412	200.351	71.425	184.937	253.677	318.614	286.195	243.853	222.005	246.784	160.248	234.699	214.985	149.284	290.753	268.238	120.016	123.196	127.963	198.369	148.154	177.047	503.381	294.453	163.56	178.806	291.27	288.719	284.872	262.565	287.773	471.491	175.119	154.904	179.832	164.317	151.145
14391	Gabpb1	89.896	204.414	186.282	109.996	177.733	193.146	119.864	119.105	174.506	113.889	122.859	112.21	111.714	457.757	278.583	103.602	309.812	370.809	68.007	615.409	514.812	112.61	548.727	336.747	208.781	263.995	234.995	194.59	293.017	186.494	334.702	99.032	110.978	161.649	0	85.035	182.153	81.108	194.158	354.288	154.305	151.386	65.355	124.744	46.596
14460	Gata1	1174	0	0	503.515	0	0	0	0	0	0	0	0	0	0	0	0	0	0	0	0	0	0	0	0	0	0	0	0	0	0	0	0	0	0	0	0	0	0	0	0	0	0	0	0	0
14461	Gata2	6.453	0	0	0	0	0	0	0	0	0	0	0	0	0	0	0	0	0	0	0	0	0	0	0	0	0	0	0	0	0	0	0	0	0	0	0	0	0	0	0	0	0	0	0	0
14463	Gata4	87.841	176.138	150.859	33.608	55.706	64.245	0	42.164	0	0	0	2.542	18.701	0	0	0	0	0	0	0	0	0	0	0	78.75	67.898	63.118	105.183	116.621	112.243	148.102	147.475	164.086	167.189	217.016	179.403	193.449	112.253	198.082	352.487	124.807	0	0	0	157.802
14465	Gata6	35.182	87.466	74.359	33.144	54.818	57.887	43.472	0	38.438	19.093	0	0	0	0	30.453	31.429	28.051	30.233	0	25.215	0	25.582	40.644	32.829	41.865	37.304	38.329	0	0	54.601	58.87	0	0	0	75.424	0	0	0	0	40.567	0	35.741	0	38.816	0
14582	Gfi1b	18.195	91.616	58.361	22.315	27.357	20.926	0	88.689	3.341	0	0	0	30.656	131.2	154.411	0	6.761	174.86	0	0	0	0	0	0	0	0	0	0	0	0	0	0	0	0	0	0	0	0	0	0	0	0	0	0	0
14634	Gli3	0.549	0	0	0	0	0	0	0	0	0	0	0	0	0	0	0	0	0	0	0	0	0	0	0	0	0	0	0	0	0	0	4.543	0	0	0	0	0	0	0	0	0	0	0	0	0
14815	Nr3c1	0	0	0	0	1.255	1.545	0.956	5.337	1.5	0	0	2.473	0	0	2.048	5.614	0	2.539	0	2.182	1.634	0.418	1.422	0	0	0	0	4.764	2.456	4.373	2.87	3.454	26.626	36.747	30.383	33.672	36.325	35.839	41.1	43.878	23.127	19.489	24.543	31.194	26.487
14886	Gtf2i	139.599	197.196	194.093	81.722	87.838	109.132	72.41	68.548	78.271	17.795	25.399	32.329	52.706	82.975	87.218	12.47	72.52	67.784	8.006	43.028	82.773	20.627	33.124	76.49	69.037	71.266	27.7	52.861	60.273	57.372	34.596	39.516	14.166	43.793	53.857	63.337	46.516	92.971	48.794	27.826	19.357	11.559	4.597	0	12.79
15111	Hand2	7.277	10.387	9.259	0	0	0	0	0	0	0	0	0	0	0	0	0	0	0	0	0	0	0	0	0	0	0	0	0	0	0	0	0	0	0	0	0	0	0	0	0	0	0	0	0	0
15205	Hes1	0	0	0	0	0	0	0	0	0	0	0	0	4.538	0	0	0	0	0	0	8.808	0	0	34.669	22.247	0	0	0	0	0	0	11.282	65.002	0	0	0	0	0	0	0	0	0	0	0	0	0
15209	Hesx1	0	0	0	0	9.418	0	3.32	0	0	0	0	7.11	0	0	0	0	0	0	0	0	0	0	0	0	0	0	0	0	0	0	0	0	0	0	0	0	0	0	0	0	0	0	0	0	0
15227	Foxf1	0	0	0	4.233	0	7.859	0	13.721	0	0	14.659	11.777	16.695	11.15	9.509	36.909	0	16.661	0	13.171	0	0	0	9.917	23.466	26.377	21.222	0	31.889	28.249	0	24.879	5.948	26.691	0	0	0	0	23.976	0	28.8	0	0	0	0
15242	Hhex	0	0	0	0	0	0	0	0	0	0	0	0	0	0	0	0	0	0	0	0	51.378	19.599	0	0	0	0	0	0	32.552	0	42.047	0	264.806	127.923	0	139.835	156.938	54.291	157.93	0	212.584	228.724	270.79	320.243	353.04
15248	Hic1	0.908	1.348	0	0	0	0	0	0	0	0	0	0	0	0	0	0	0	0	0	0	0	0	0	0	0	0	0	0	0	0	5.836	0	0	15.015	22.358	17.998	8.283	9.997	7.32	0	0	0	0	0	0
15251	Hif1a	0	3.547	1.674	1.916	5.018	5.368	0	3.061	0.937	0	0	0	0	3.374	1.103	0	1.986	1.003	0	0	0	0	0	0	0	0	0	0	0	0	0	0	0	0	0	0	0	0	0	0	0	0	0	0	0
15353	Hmg20b	8.24	37.097	33.975	17.026	38.629	52.61	16.915	23.163	33.397	6.254	4.466	88.223	16.068	8.769	14.391	21.984	9.982	17.578	19.001	33.233	32.565	15.342	29.335	15.766	44.745	39.584	34.381	45.41	50.097	63.816	79.708	49.876	7.87	12.428	24.354	36.001	34.525	49.494	44.37	21.572	19.632	15.448	0	28.966	21.575
15354	Hmgb3	7431.66	12248.8	12975	11481.8	13824.6	10759.5	14773.9	12319.7	17963.9	13058.1	14700	14294.6	10955.7	12070.1	15406.3	11770.8	13477.6	15616	7434.35	8765.84	6925.74	5219.73	4603.36	7692.86	3968.95	5415.59	5181.46	2402.64	2397.43	2781.43	2506.35	3836.33	1460.44	1680.76	1837.42	2195.82	2046.58	2079.15	1770.23	1438.64	1242.36	1314.96	1156.89	1496.93	1411.9
15361	Hmga1	16728.4	18796	20799.7	19624.5	20083.4	0	15265.6	18620.5	11117.7	13889.7	15253.9	10997.3	0	0	0	0	0	0	25457.6	0	0	21679.1	0	0	0	0	0	0	0	0	0	19203	0	0	0	0	0	0	0	0	0	0	9096.5	9190.31	13914.5
15364	Hmga2	18807.4	7825	8455.54	5665.05	1606.62	2467.45	4304.18	2474.65	911.204	1693.84	1683.28	1327.36	877.645	1078.32	805.121	2073.45	964.666	1185.13	5877.67	1674.74	1671.66	5171.1	3024.95	1162.61	913.914	1209.39	1152.22	1183.26	1160.15	1188.01	2340.27	1233.72	220.821	646.42	677.124	637.36	540.965	498.518	473.939	636.861	272.626	256.765	235.72	216.698	252.856
15375	Foxa1	0	0	0	0	0	0	0	0	9.277	0	9.567	13.387	0	0	0	0	0	0	7.355	0	6.864	0	0	0	5.678	0	0	0	0	0	0	15.795	0	0	21.219	0	0	0	0	37.09	56.64	34.484	0	89.621	109.651
15378	Hnf4a	351.088	296.498	256.267	491.878	193.102	305.546	275.952	355.699	292.374	142.509	300.041	192.325	653.243	428.846	373.239	246.658	337.812	460.983	183.745	315.507	316.899	308.901	329.81	278.33	379.76	249.904	234.626	198.34	402.757	243.02	1664.51	991.051	4292.56	1010.83	944.219	909.969	2797.79	2930.33	2809.74	3511.91	3286.94	3009.69	2372.23	2756.99	2030.18
15379	Onecut1	13.743	0	10.405	0	0	0	0	8.646	0	0	16.024	0	0	0	0	17.794	20.561	15.135	115.511	91.352	42.424	30.644	60.41	28.879	0	0	0	0	0	84.922	83.197	70.519	124.088	0	0	41.421	107.309	104.618	106.383	267.995	98.051	100.014	100.469	104.044	95.405
15402	Hoxa5	65.304	38.79	37.098	0	0	0	0	2.513	0	0	0	0	0	0	0	0	0	0	0	0	0	3.77	0	0	0	0	0	0	0	0	0	0	0	0	6.363	0	0	0	0	0	0	0	0	0	0
15412	Hoxb4	24.905	17.54	10.165	0	116.62	126.725	0	0	0	0	0	0	0	0	0	0	0	0	0	0	0	0	0	0	0	0	0	0	0	0	0	0	0	0	0	0	0	0	0	0	0	0	0	0	0
15424	Hoxc5	6.673	0	0	0	0	0	0	0	0	0	0	0	0	0	0	0	0	0	0	0	0	0	0	0	0	0	0	0	0	0	0	0	0	0	0	0	0	0	0	0	0	0	0	0	0
15499	Hsf1	0	0	0	0	1.419	28.735	0	0	0	0	0	0	0	0	0	0	0	0	0	3.115	0	0	0	0	0	0	0	0	0	0	0	0	0	0	0	0	0	0	0	13.62	0	3.613	0	11.46	13.729
15500	Hsf2	0	0	0	0	0	0	0	0	0	0	0	0	0	0	0	0	0	0	0	0.891	0	0	0	0	0	0	0	0	0	0	1.917	0	0	0	0	0	0	0	0	9.859	0	0	0	0	0
16362	Irf1	0	0	0	0	0	0	0	0	0	0	0	1.712	0	0	0	0	0	0	0	0	0	0	0	0	0	0	0	0	0	0	0	0	0	0	0	0	0	0	0	0	0	0	0	0	0
16363	Irf2	561.594	308.799	324.026	107.822	188.622	164.691	174.294	191.573	279.654	71.075	179.234	117.184	157.775	239.483	216.423	118.996	178.984	239.051	211.956	150.574	106.299	125.781	107.136	77.212	87.486	48.286	60.886	104.361	69.836	172.575	218.931	50.329	64.476	117.585	0	150.501	0	136.15	190.121	317.909	117.343	99.118	227.601	220.698	156.941
16391	Irf9	0	0	0	0	0	0	2.137	0	0	0	0	0	0	0	0	0	0	0	0	0	0	0	0	0	0	0	0	0	0	0	0	0	0	0	0	0	0	0	0	17.962	0	0	0	0	0
16468	Jarid2	0	0	0	0	0	0	0	0	0	0	0	0	0	1.152	0	0	0	0	0	0	0	0	0	0	0	0	0	0	0	0	0	0	0	0	0	0	0	0	0	0	0	0	0	0	0
16476	Jun	0	5.222	0	0	0	0	0	0	0	0	0	0	0	0	0	0	0	0	0	0	0	0	0	0	0	0	0	0	0	0	0	0	0	0	0	0	0	0	0	0	0	0	0	0	0
16477	Junb	10.246	0	0	4.154	0	0	0	0	0	0	0	0	0	0	0	0	0	0	0	0	0	0	0	0	0	0	0	0	0	0	0	0	0	0	0	0	0	0	0	0	0	0	0	0	0
16478	Jund	21.252	9.614	0	0	0	0	0	0	0	0	0	0	0	0	0	0	0	0	0	0	0	0	0	0	0	0	0	0	0	0	0	0	0	0	0	0	0	0	0	10.455	0	0	0	0	0
16549	Khsrp	0	1.709	0	0	26.889	23.141	0	24.261	10.197	0	10.399	0	6.432	2.585	4.952	8.448	35.992	33.616	0	0	1.503	5.093	2.733	1.631	6.141	5.667	3.727	9.408	10.311	9.747	9.874	35.521	38.834	42.788	35.949	30.523	27.727	27.455	49.86	58.35	76.96	64.829	42.36	43.054	43.571
16596	Klf1	0	0	11.106	6.052	0	0	0	0	0	0	0	0	0	0	0	0	0	0	0	0	0	0	0	0	0	0	0	0	0	0	0	0	0	0	0	0	0	0	0	0	0	0	0	0	0
16597	Klf12	4.758	31.96	26.887	0	17.6	0	0	0	0	0	0	0	0	0	0	0	0	0	0	0	0	0	0	0	0	0	0	0	0	0	0	3.14	49.101	71.011	72.933	73.956	61.741	64.88	58.118	17.873	20.315	0	32.706	20.771	31.345
16599	Klf3	6.441	37.911	33.305	0	29.796	91.383	27.981	91.748	69.134	29.684	0	0	0	0	0	64.21	26.319	24.41	38.46	25.453	0	0	0	49.299	49.202	0	59.378	0	0	66.645	0	0	0	95.807	0	0	80.905	75.349	93.304	0	27.934	13.253	36.112	23.834	78.345
16601	Klf9	0	0	0	0	0	0	0	0	0	0	0	0	0	0	0	0	0	0	0	0	0	0	0	0	0	0	0	0	0	0	0	0	0	0	0	0	11.269	19.018	0	0	0	0	0	0	0
16658	Mafb	0	0	0	0	0	0	0	0	0	0	0	0	0	0	0	0	0	0	0	0	0	0	0	0	0	0	0	0	0	0	0	0	0	0	0	0	0	0	0	31.4	0	0	0	0	0
16842	Lef1	0	0	0	0	0	0	0	0	0	0	0	0	0	0	17.14	20.661	0	10.232	20.52	75.487	59.926	6.988	79.512	71.293	14.427	0	0	0	20.15	0	22.889	0	0	0	0	0	13.081	0	0	0	0	0	0	0	0
16870	Lhx2	11.349	15.578	7.292	4.815	0	0	0	0	0	0	0	0	0	0	0	0	0	0	0	0	0	0	0	5.266	0	0	0	0	0	0	0	0	0	0	26.506	0	0	19.422	0	0	0	0	0	0	0
16969	Zbtb7a	8.924	16.125	9.579	12.61	35.023	54.031	55.318	37.582	0	22.847	0	15.448	27.128	0	0	0	0	0	4.335	0	0	10.924	0	0	0	0	0	0	0	0	0	0	0	0	0	0	0	0	11.668	0	4.968	6.756	0	0	0
16978	Lrrfip1	0	0	0	0	0	0	0	0	0	0.34	0	0	0	1.897	0.354	1.188	1.839	2.19	1.787	2.472	1.789	0	1.232	0	1.699	0	2.044	0	2.383	2.576	0	3.126	7.832	3.56	4.53	4.01	6.203	5.37	6.78	0	6.788	6.11	5.385	7.154	7.662
17002	Ltf	0	0	0	0	0	0	0	0	0.251	2.154	4.464	3.152	2.403	14.536	76.985	20.7	86.192	83.517	54.861	237.304	232.464	2.965	54.34	84.592	18.932	15.294	12.777	96.803	12.964	25.867	33.113	3.844	0	0	0	0	0	0	0	0	0	0	0	0	0
17089	Lyar	4.518	52.338	49.547	10.391	46.572	42.681	7.821	25.051	73.207	60.238	22.031	34.259	16.013	241.058	135.197	54.756	35.99	120.222	55.323	223.292	216.339	0	195.761	171.953	147.861	141.271	148.68	240.45	131.711	157.478	0	11.656	97.196	138.704	47.578	124.561	42.655	58.218	67.559	6.043	129.916	13.162	97.03	172.76	175.352
17095	Lyl1	17.399	15.969	0	12.665	0	89.978	10.501	0	0	14.828	0	3.672	8.457	13.076	11.145	0	0	0	0	0	0	0	0	0	0	0	0	0	0	0	0	0	0	0	0	0	0	0	0	0	0	0	0	0	0
17119	Mxd1	41.533	44.88	47.478	83.789	0	0	57.705	65.999	14.62	20.188	85.38	85.208	0	22.57	18.404	0	15.354	0	0	0	0	23.08	0	0	0	0	0	0	0	0	31.972	0	0	0	0	0	0	0	0	0	0	0	0	0	0
17121	Mxd3	3.693	0	0	4.318	0	0	5.117	6.595	0	3.87	6.465	3.145	2.86	0	7.654	0	0	0	0	0	0	0	0	0	0	0	0	0	0	0	0	0	0	0	0	0	0	0	0	0	0	0	0	0	0
17122	Mxd4	14.439	0	0	13.307	0	0	0	0	0	0	0	0	0	0	0	0	0	0	0	0	0	0	0	0	0	0	0	18.607	0	0	0	0	0	0	0	0	0	0	18.995	49.316	19.427	29.089	0	0	0
17127	Smad3	0	2.132	1.75	0	0	2.123	2.357	0	2.242	2.876	0	0	0	0	0	4.098	0	0	0	4.095	1.816	0	0	1.057	3.24	2.942	4.357	0	1.755	4.53	0	0	0	3.877	5.009	5.987	3.207	2.004	4.877	0	0	3.963	4.521	4.733	0
17128	Smad4	1.248	0	0	0	0	0	1.048	0	0	0	0	0	0	0	0	0	9.11	0	0	0	0	0	0	0	0	0	0	0	0	0	7.926	0	0	0	0	0	0	0	0	27.31	0	0	0	0	0
17129	Smad5	0	0	0	0	0	0	0	0	0	0	0	0	0	0	0	0	0	0	0	11.737	3.776	0	0	0	0	0	0	0	0	0	0	0	0	0	0	38.914	0	0	0	0	0	0	44.669	0	0
17132	Maf	0	0	0	0	0	0	0	0	0	0	0	0	0	0	0	0	0	0	0	0	0	0	0	0	0	0	0	0	0	0	0	0	0	0	0	0	0	0	0	14.724	0	0	0	0	0
17133	Maff	73.603	105.161	92.491	52.136	0	0	46.756	142.96	0	30.543	0	85.619	0	48.217	34.587	100.223	79.325	77.217	104.658	64.208	70.442	28.138	0	0	0	0	0	0	0	0	0	27.005	0	0	0	0	0	0	0	0	0	0	0	0	0
17134	Mafg	302.033	170.121	174.368	137.724	52.145	84.862	125.819	160.642	35.699	64.214	125.798	96.56	86.54	108.127	127.806	78.741	81.695	119.256	86.157	278.089	247.356	131.544	199.6	168.011	232.206	217.926	210.991	282.49	305.531	294.717	192.109	146.481	383.408	463.181	426.337	418.97	512.916	401.176	446.232	243.868	342.886	341.816	275.332	359.983	314.677
17135	Mafk	434.017	212.324	191.459	283.976	78.876	84.677	81.87	147.294	67.972	92.325	59.565	115.523	0	60.361	50.751	72.384	55.296	58.16	81.021	124.858	102.612	68.736	75.647	68.057	102.926	97.044	74.865	77.867	81.436	90.688	25.867	44.82	83.364	82.177	88.017	41.555	117.626	116.172	114.784	68.862	75.935	128.573	87.248	87.906	80.831
17187	Max	881.705	1375.69	1226.51	1039.81	1112.59	1336.66	876.614	455.381	979.136	621.08	354.473	395.853	392.793	963.498	898.54	805.458	591.041	762.24	646.976	787.447	795.659	498.341	579.802	619.524	915.016	710.986	714.27	845.588	936.499	935.862	1065.42	735.681	706.834	716.085	728.74	661.54	833.96	666.66	775.419	296.105	545.509	609.378	530	655.733	624.678
17188	Maz	73.762	272.732	166.673	51.631	154.548	258.755	62.736	39.217	116.543	54.355	15.115	20.351	46.796	181.509	174.826	74.353	74.77	105.424	70.265	50.735	0	16.023	74.005	66.259	106.045	50.056	65.575	50.904	49.141	105.315	85.165	88.561	73.997	77.485	99.685	90.246	90.149	79.054	99.441	45.08	123.868	68.389	0	48.67	44.813
17190	Mbd1	26.828	22.035	17.521	12.846	7.65	9.92	6.872	40.271	0	0	0	0	0	0	0	0	2.469	0	4.056	0	7.23	6.612	0	0	19.772	0	12.77	22.122	26.058	16.62	12.562	0	30.452	74.847	63.167	40.807	59.107	52.032	38.16	65.41	50.365	51.857	14.192	0	17.899
17191	Mbd2	5.621	17.949	19.688	0	8.791	16.645	5.363	13.82	12.082	27.339	25.78	31.058	29.362	23.262	24.612	24.29	22.717	24.682	56.509	0	12.693	22.718	9.257	11.292	19.803	0	8.953	15.372	14.33	0	10.336	44.614	3.705	17.355	27.394	18.956	21.937	32.208	20.165	105.077	25.976	32.966	0	14.406	11.035
17192	Mbd3	5.068	205.98	29.418	0	142.146	2.367	0	2.877	0	0	0	0	0	0	0	0	0	0	0	0	0	0	0	0	0	1.937	0	0	0	0	0.997	2.938	0	6.219	5.934	0	8.269	9.695	7.94	5.913	0	0	0	0	0
17193	Mbd4	5.934	0	0	0	0	0	0	0	0	0	0	0	0	0	0	0	0	0	0	0	0	0	0	0	0	0	0	0	0	0	0	0	0	0	0	0	0	0	0	0	0	0	0	0	0
17257	Mecp2	318.526	346.457	349.32	138.57	192.699	204.278	159.305	189.964	137.249	124.558	168	108.181	98.255	263.888	139.5	243.675	208.453	242.91	350.351	475.825	385.23	422.553	695.554	659.252	930.391	794.036	627.46	993.005	1247.08	1077.17	1128.45	866.377	1274.01	1965.48	2259.96	2208.02	2009.18	2353.2	2069.67	3102.12	1778.67	1614.95	1839.36	2146.19	1853.82
17258	Mef2a	0	0	0	0	24.215	19.047	0	0	22.308	0	0	0	0	0	0	0	31.799	0	0	0	0	0	0	0	0	33.761	35.093	48.871	0	0	0	20.627	44.985	0	41.864	0	28.832	0	0	0	31.082	43.672	0	0	42.73
17260	Mef2c	0	0	0	17.038	0	0	0	64.572	0	26.627	61.335	0	0	0	0	109.103	124.25	0	0	221.782	232.97	0	0	0	213.156	196.409	0	0	0	0	72.709	0	0	0	63.981	35.064	49.331	48.539	73.778	87.62	0	0	0	67.589	0
17261	Mef2d	4.086	18.137	13.804	18.052	34.057	32.847	17.341	11.484	12.555	0	0	28.531	22.847	36.054	35.413	32.317	35.901	39.769	27.395	42.938	39.006	18.981	47.552	40.807	45.373	43.465	0	53.766	48.011	0	0	43.604	59.246	0	42.241	47.61	38.427	43.696	39.687	30.708	41.901	55.326	59.966	61.365	58.089
17268	Meis1	58.122	62.348	40.84	17.177	27.635	23.606	11.307	7.726	0	0	0	0	3.592	0	9.547	0	5.439	5.632	0	4.425	0	2.73	0	0	0	0	0	0	0	0	2.376	0	0	0	0	0	0	0	0	0	0	0	0	0	0
17344	Pias2	0	0	0	0	0	0	0	0	0	0	0	0	0	0	0	0	0	0	0	0	0	0	0	0	0	0	0	0	0	0	0	1.339	0	0	0	0	0	0	0	0	0	0	0	0	0
17425	Foxk1	23.537	30.1	21.632	25.569	88.485	65.093	40.175	17.18	41.511	35.973	37.783	26.193	37.07	75.629	77.109	65.169	76.542	73.278	43.778	82.507	64.166	13.953	83.233	100.457	64.348	52.323	83.238	101.109	89.69	134.217	56.038	206.809	151.707	90.603	123.252	116.54	190.687	194.657	120.805	107.637	128.117	151.548	69.081	70.446	101.923
17428	Mnt	21.102	109.051	88.186	65.78	96.086	87.115	69.25	95.695	32.573	81.182	51.433	71.803	91.581	35.13	40.365	87.473	13.564	19.165	55.544	31.087	29.584	32.923	57.734	26.916	37.799	8.763	52.465	76.069	43.727	51.899	78.359	122.855	22.01	4.074	20.352	26.123	46.445	24.938	44.743	75.455	53.896	34.105	61.921	0	23.89
17536	Meis2	33.502	15.974	25.077	5.061	8.121	10.524	0	0	0	0	0	0	0	0	0	0	0	0	0	0	0	0	0	0	0	0	0	0	0	0	0	0	0	0	0	0	0	0	3.311	1.203	0	0	0	0	0
17859	Mxi1	21.877	19.479	11.325	0	24.707	7.454	8.391	34.324	26.344	0	32.976	39.586	43.423	33.512	44.653	0	36.967	38.723	0	0	0	0	17.248	10.111	0	0	0	0	0	0	0	0	0	0	0	0	0	0	0	0	0	0	0	0	0
17863	Myb	0	0	4.243	3.119	8.021	7.87	4.406	13.458	10.397	11.557	13.432	10.122	5.692	21.879	12.607	4.118	7.228	15.116	0	17.23	13.127	0	10.702	4.428	0	0	0	0	0	0	0	0	0	0	0	0	0	0	0	0	0	0	0	0	0
17865	Mybl2	0	0	0	0	0	0	0.962	0	0	0.139	2.264	3.315	0	0	0	0	0	0	0	0	0	0	0	0	0	0	0	0	0	0	0	0	0	0	0	0	0	0	0	0	0	0	0	0	0
17869	Myc	26.726	20.915	23.713	0	5.138	16.032	13.992	0	0	0	0	0	0	0	7.666	0	0	0	0	0	0	0	0	0	0	0	0	0	0	0	0	0	0	0	0	0	0	0	0	0	0	0	0	0	0
17876	Myef2	57.314	112.259	93.092	3.41	10.967	7.875	0	2.766	0	0	0	0	0	0	0	0	0	0	0	0	0	0	0	0	4.825	0	50.31	4.266	0	17.415	6.809	11.247	186.877	200.343	275.354	225.411	394.268	268.063	306.093	587.965	135.4	120.258	272.927	259.027	303.193
18018	Nfatc1	6.57	17.196	16.927	7.894	5.481	2.738	8.724	12.444	6.415	10.762	10.219	16.422	15.307	9.605	9.101	26.363	12.515	15.377	34.315	19.138	20.744	38.576	43.269	28.696	29.957	17.499	15.827	43.089	63.937	39.417	109.767	83.301	43.542	27.1	35.55	38.002	48.768	28.999	41.398	162.675	50.594	56.738	48.515	50.26	49.334
18019	Nfatc2	0	0	0	0	1.267	0	0.953	0	0	0	0	0	0	0	0	0	0	0	7.455	0	0	6.396	0	0	7.229	5.029	0	4.783	0	0	14.09	11.453	0	0	0	0	0	2.15	0	0	0	0	0	0	0
18021	Nfatc3	7.74	21.155	21.388	18.729	25.381	27.024	24.595	16.318	18.503	22.06	19.375	20.274	21.495	21.63	14.672	47.609	46.671	13.519	44.222	57.559	17.803	30.266	84.674	64.621	28.209	26.524	10.358	21.505	19.553	24.293	60.669	32.679	34.791	16.106	18.683	15.577	16.117	22.702	33.276	71.276	49.642	38.685	27.363	25.238	27.15
18022	Nfe2	222.979	129.532	121.589	93.573	64.942	62.576	75.471	116.65	56.907	47.256	77.462	86.546	51.816	32.805	24.952	56.866	22.875	0	61.527	53.887	47.553	19.979	0	18.075	15.208	19.257	20.5	17.789	0	7.975	0	8.365	0	0	0	0	0	0	0	0	0	0	0	0	0
18024	Nfe2l2	7.249	1.088	0	5.481	0	0	0	3.436	0	0	0	0	0	0	0	0	0	0	0	0	0	0	0	0	0	0	0	0	0	0	0	0	0	0	0	0	0	0	0	0	0	0	0	0	0
18027	Nfia	224.503	232.568	292.374	138.687	122.848	123.832	111.407	119.65	99.183	67.861	198.949	192.496	276.244	260.778	284.312	686.797	351.324	357.417	732.171	522.105	435.974	1097.03	929.36	839.295	1139.15	1166.37	1026.62	1316.87	1183.91	1616.9	2842.32	1801.13	4707.13	4294.25	3673.36	4175.84	4141.61	3903.29	4944.09	3866.78	4142.6	4251.62	5454.3	5083.36	3689.73
18028	Nfib	363.841	363.581	310.569	181.343	176.421	195.873	131.84	219.467	204.445	108.457	247.352	249.969	357.901	376.467	406.863	737.294	477.448	415.06	761.494	706.03	639.657	1390.71	1102.66	997.873	1298.51	1363.22	1127.06	1701.2	1556.07	1783.26	3960.37	2166.61	3812.01	3920.42	3827.77	3816.57	3875.6	3249.37	4156.74	3359.47	3753.11	3559.1	4604.41	4233.3	3642.63
18029	Nfic	253.529	165.95	172.328	176.877	97.071	139.45	88.358	126.21	76.886	35.617	140.168	136.639	210.498	175.558	207.755	418.194	228.255	259.388	432.445	305.232	311.806	678.874	557.806	583.291	1031.32	914.844	772.944	716.521	1203.51	1194.67	3136.05	2162.34	4781.2	3821.79	4039.84	4062.25	5063.78	2953.58	3569.05	4304.15	4741.7	5037.66	5066.39	5394.83	4207.93
18030	Nfil3	4.619	0	0	0	0	0	0	0	0	0	0	0	0	0	0	0	0	0	0	0	0	9.532	0	0	0	0	0	0	13.463	0	27.683	15.548	53.967	0	6.909	0	19.942	13.003	21.849	106.254	37.326	36.64	15.461	0	5.944
18032	Nfix	178.087	107.247	85.083	123.918	80.108	82.244	87.947	112.778	53.71	18.14	140.95	135.769	225.517	119.959	209.111	406.824	214.323	215.405	350.948	296.734	272.658	610.525	514.459	478.887	755.977	603.666	522.307	622.79	629.275	807.798	2450.2	1795.86	3322.82	2900.87	4024.44	3096.33	3106.02	3305.17	3641.47	3254.55	3891.42	3488.75	3426.62	3385.75	2691.72
18033	Nfkb1	4.386	0.863	1.291	5.288	0	1.883	6.772	2.769	4.727	2.741	12.111	3.277	4.095	5.776	4.367	0	12.239	10.799	11.438	0	0	3.269	0	0	0	0	0	0	0	0	11.939	6.996	0	0	0	0	0	0	10.551	13.966	10.613	10.212	21.585	20.11	18.624
18034	Nfkb2	0	0	0	0	0	0	0	0	0	0	0	0	0	0	0	0	0	0	0	0	0	0	0	0	0	0	0	0	0	0	0	0	0	0	0	0	0	0	0	3.955	0.556	0	1.618	0	0
18044	Nfya	3120.13	3216.66	2436	3143.95	1640.37	1899.53	2243.82	3901.96	1232.84	432.84	1148.67	448.026	2386.06	678.761	615.997	985.086	444.538	486.686	243.741	662.931	551.587	1140.02	857.762	545.583	1709.7	1800.7	1808.63	1473.8	1451.48	1736.25	1473.3	3121.26	784.307	1094.95	1211.04	1188.77	704.38	1077.93	1020.6	1572.67	532.206	576.77	946.947	421.232	741.847
18045	Nfyb	399.628	278.768	386.701	540.534	223.423	254.548	323.041	67.753	130.501	0	0	0	0	0	54.359	0	0	0	0	0	0	202.871	18.374	0	0	0	0	0	0	0	893.484	625.841	0	0	65.028	0	0	0	0	659.768	0	0	0	510.704	0
18046	Nfyc	5008.59	9392.3	8355.44	6720.28	6691.6	7352.03	4768.39	6618.93	6114.86	918.707	2095.87	893.835	3799.18	3896.75	3009.5	1545.24	1581.1	1760.98	640.026	2666.27	2132.86	2054.85	3661.05	3555.25	7782.73	6367.14	6139.43	6372.17	5912.91	5842.18	4210.18	5034.43	2504.07	4308.43	4760.14	4246.36	3000.47	3040.5	3372.35	3521.28	2429.5	2822.82	2432.09	2432.63	2240.65
18103	Nme2	0	0	0	0	0	0	0	0	0	0	0	0	0	0	0	0	0	0	0	0	0	18.893	0	0	0	0	0	0	0	0	0	0	0	0	0	0	0	0	0	0	0	0	0	0	0
18109	Mycn	0	8.161	11.939	0	0	0	0	0	0	0	0	0	0	0	0	0	0	0	0	0	0	0	0	0	0	0	0	0	0	0	0	0	0	0	0	0	0	0	0	0	0	0	0	0	0
18143	Npas2	0	0	0	0	0	0	0	0	0	0	0	0	0	0	0	0	0	0	0	0	0	0	0	0	0	0	0	0	0	0	6.785	0	0	0	0	0	0	0	0	37.558	0	0	0	0	0
18171	Nr1i2	0	0	0	0	0	0	0	0	0	0	0	0	0	0	0	0	0	0	0	0	0	0	9.966	19.476	0	0	0	0	0	0	0	22.419	0	0	0	0	0	0	0	8.93	4.626	0	0	0	0
18181	Nrf1	148.23	309.53	328.433	512.127	716.49	717.358	590.835	1161.71	900.547	787.912	789.548	976.723	1283.3	1505.62	1733.42	940.031	1078.75	1241.32	591.989	1620.97	1335.14	457.64	1441.4	1175.8	748.622	595.422	730.656	626.111	893.147	837.333	970.972	763.767	446.68	360.691	398.305	474.529	387.982	305.669	378.377	490.712	403.037	412.476	268.858	375.343	337.377
18514	Pbx1	39.221	68.706	58.178	13.899	29.057	30.514	0	22.737	0	0	0	0	0	0	0	0	0	2.49	0	0	0	0.895	0	0	0	0	0	8.573	0	0	17.332	60.03	2.557	21.024	18.87	27.488	19.431	19.967	11.651	31.242	0	0	0	0	0
18515	Pbx2	46.84	92.413	106.882	41.649	53.52	54.933	26.317	20.588	23.946	0	1.922	5.107	8.258	12.958	11.062	0	11.025	10.643	5.143	7.255	8.568	2.891	3.156	0	5.105	4.747	0	2.557	5.091	0	11.168	25.704	8.81	9.69	7.531	6.704	12.446	17.233	20.099	22.348	5.649	0	6.154	0	6.956
18516	Pbx3	41.418	53.244	55.51	10.326	18.543	24.835	11.142	15.344	4.833	0	0	0	0	0.49	0	0	0	0	0	3.096	0	0	0	0	0	0	2.805	0.972	0	0	4.723	0	0	0	0	9.555	0	7.601	8.557	0	0	0	0	0	0
18673	Phb	7.178	28.326	59.338	12.319	72.815	35.118	29.521	125.578	181.632	105.233	103.591	98.937	88.909	38.404	48.377	209.204	47.691	44.692	261.328	67.493	71.578	41.545	64.011	56.085	155.108	168.919	72.318	172.932	285.861	398.472	132.902	143.53	114.997	327.921	309.796	270.878	162.471	385.801	287.626	152.799	80.908	109.984	237.583	259.79	241.18
18771	Pknox1	27.63	0	13.563	23.01	0	0	20.293	18.633	0	0	0	0	0	0	0	0	0	0	0	0	0	0	0	0	0	0	0	0	0	0	0	29.104	0	0	0	0	0	0	0	0	8.03	8.331	0	0	0
18933	Prrx1	0	0	0	0	0	0	0	0	0	0	0	0	0	0	0	0	0	0	0	0	0	0	0	0	0	0	0	0	0	0	0	9.989	0	0	0	0	0	0	0	0	0	0	0	0	0
18986	Pou2f1	0	8.435	7.195	33.415	28.852	3.552	55.08	75.915	78.662	5.529	46.068	53.124	61.88	114.198	75.266	5.241	26.136	17.78	54.856	11.765	4.992	2.473	0	0	0	0	0	0	0	0	0	20.926	0	0	0	0	0	0	0	8.685	0	0	0	0	0
18987	Pou2f2	0	0	0	0	0	0	7.938	0	0	0	0	0	0	0	0	0	0	0	0	0	0	0	0	0	0	0	0	0	0	0	0	0	0	0	0	0	0	0	0	0	0	0	0	0	0
19013	Ppara	0	0	0	0	0	0	0	2.935	0	0	6.896	0	0	18	16.592	0	28.863	28.128	0	0	0	11.965	1.542	2.501	0	0	6.241	0	0	0	99.319	110.781	52.127	82.359	62.98	74.028	24.333	45.93	33.307	197.69	47.436	60.04	62.579	56.922	52.62
19015	Ppard	0	0	0	0	0	0	0	0	0	0	0	0	0	0	0	0	0	0	0	0	0	0	0	0	0	0	0	0	0	0	0	0	0	0	0	0	0	0	0	37.416	0	0	0	0	0
19016	Pparg	0	0	0	0.548	0	0	0	0	0	0	0	0	0	0	0	0	0	0	0	0	0	0	0	0	0	0	0	0	0	0	14.597	8.297	0	0	0	0	35.96	20.497	0	5.361	0	0	0	0	0
19130	Prox1	1.891	5.759	4.698	27.2	13.443	10.771	11.689	11.972	41.802	32.163	65.305	56.634	61.623	48.49	50.527	49.672	49.858	66.845	34.086	61.14	63.135	20.46	37.664	30.367	9.971	21.248	13.346	43.363	34.826	31.969	39.377	106.643	77.413	100.472	127.794	92.882	94.535	105.717	78.948	228.241	47.946	76.365	28.448	57.124	50.891
19290	Pura	7.155	15.944	0	15.269	40.71	21.862	6.961	7.969	116.867	0	25.283	7.327	60.093	144.576	72.488	13.639	36.662	87.464	19.49	127.69	118.28	133.246	138.196	196.763	273.945	174.999	198.06	624.422	519.564	453.892	560.048	292.258	1036.2	981.849	1072.66	975.869	867.872	758.233	660.531	2802.74	637.632	1086.8	865.399	973.108	996.196
19291	Purb	38.299	98.718	121.484	69.266	97.846	155.557	72.177	43.85	174.258	18.741	71.784	55.303	232.676	230.126	308.066	61.873	211.968	240.207	49.48	350.22	237.681	262.532	443.011	416.356	293.479	287.158	337.289	234.332	560.09	556.752	429.668	303.573	745.849	737.384	374.191	658.916	611.814	580.009	667.805	1087.03	778.319	576.032	708.85	728.545	749.161
19401	Rara	3.844	8.52	7.212	0.62	1.516	5.422	1.207	5.939	11.462	0.096	2.396	3.091	7.95	0	3.561	0	2.574	4.902	0	0	0	0.601	0	0	0	0	1.757	0	0	0	12.812	14.38	24.44	17.257	0	13.809	9.536	14.392	0	38.85	37.654	10.313	26.739	0	3.316
19411	Rarg	6.201	7.108	9.923	1.267	2.949	3.829	1.563	2.11	1.53	0	0.499	0	5.083	0	0.645	0	0	0	0	0	0	1.335	0	0	0	1.318	0	0	0	0	22.977	20.994	15.202	20.014	0	0	4.847	10.312	8.953	41.755	10.262	3.441	0	0	9.04
19664	Rbpj	117.826	359.138	273.211	107.063	375.069	524.678	161.207	330.099	224.595	217.886	246.593	221.017	236.29	387.433	417.138	467.962	375.594	411.156	276.909	349.023	338.802	85.498	350.277	314.296	151.347	241.629	202.763	188.09	237.188	239.779	195.507	263.65	245.027	268.493	288.402	225.192	296.429	289.805	281.768	182.345	241.265	240.383	380.01	182.001	382.496
19712	Rest	20.911	3.759	0.725	0	0.106	15.41	1.666	4.437	0	0	0	1.227	1.859	1.361	1.311	0	0	0	0	0.527	0.685	0	1.021	0	0	0.546	0.669	0.943	0	2.088	0	4.187	0	0	0	0	0	0	1.262	0	0	0	0	0	0
19724	Rfx1	29.597	76.805	51.737	44.833	44.82	45.752	25.692	23.871	5.702	9.881	3.827	3.159	0	12.503	18.879	24.356	7.76	24.35	19.385	16.475	25.182	11.403	9.912	9.839	20.535	32.468	28.765	37.823	47.786	53.88	48.986	56.165	44.25	71.115	67.513	64.446	58.143	58.15	61.261	113.323	56.908	48.647	35.157	38.622	33.805
19725	Rfx2	8.352	11.83	5.954	12.682	8.91	6.218	19.164	13.279	1.93	0	8.405	4.92	6.371	12.096	22.652	0	2.79	20.971	18.347	12.251	20.593	2.566	1.548	1.523	0	8.269	0	0	11.091	0	0	0	0	0	0	0	0	0	0	0	0	0	0	0	0
19726	Rfx3	4.989	12.705	9.713	8.353	5.534	8.895	4.588	2.863	1.352	3.158	3.784	5.599	8.349	5.139	4.282	2.707	4.47	7.176	10.06	7.809	6.641	2.207	0	0	0	0	1.806	0	0	0	5.921	9.926	0	0	4.525	0	0	3.651	0	9.453	0	3.276	0	0	0
19727	Rfxank	0	0	0	0	0	1.475	1.42	0	0	0	0	7.162	0	0	0	0	0	0	0	0	0	0	0	0	0	0	0	0	0	0	0	50.988	0	0	0	0	0	0	0	0	90.974	0	0	0	0
19883	Rora	0	0	0	0	0	0	0	0	0	0	0	0	0	0	0	0	0	0	0	0	0	0	0	0	0	0	0	0	0	0	0	0	0	1.055	0	6.019	16.577	13.762	19.309	25.048	0	0	0	0	0
19885	Rorc	0	0	0	0	0	0	0	0	0	0	0	0	0	0	0	0	0	0	0	0	0	0	0	0	0	0	0	0	0	0	0	0	0	0	0	0	0	15.103	12.144	8.194	0	2.321	0	0	0
20024	Sub1	427.572	3062.27	3021.41	842.403	6233.01	5138.46	506.099	704.506	5752.02	1242.82	1250.03	1465.24	1415.38	7616.85	6889.55	3531.64	9481.14	9568.04	2337.19	10346.2	8553.11	3029.98	8654.7	8638.42	11912.5	8789.22	12458.4	13601.8	10843.1	11465.6	8007.4	592.066	5760.41	5545.41	6269.12	5959.29	5576	5231.31	4857.9	2542.48	4350.21	4504.81	4634.36	6668.47	5270.19
20181	Rxra	73.334	100.205	60.822	43.931	80.092	73.007	62.152	72.523	66.738	19.615	48.78	26.036	85.873	77.811	90.893	59.1	123.434	134.59	55.869	90.479	99.589	80.004	120.684	119.995	154.642	127.428	118.424	182.345	208.904	217.306	453.371	504.594	926.779	663.985	760.479	764.783	1025.8	1073.51	1168.4	1810.65	1190.93	1276.23	761.691	929.713	1125.39
20182	Rxrb	62.148	89.611	85.021	40.671	61.559	75.556	42.201	85.897	48.641	17.811	44.379	20.083	35.929	28.668	52.368	18.996	54.842	67.874	9.294	23.199	44.988	23.279	30.214	29.924	20.854	11.844	10.194	19.299	27.465	22.276	126.759	129.264	191.382	153.81	154.615	159.567	254.112	198.838	174.567	576.291	294.392	399.749	141.151	162.809	151.276
20183	Rxrg	0	0	0	0	0	0	0	0	0	0	0	0	0	0	0	0	0	0	0	0	0	0	0	0	0	0	0	0	0	0	192.211	132.085	286.67	202.832	227.135	275.881	390.743	337.965	380.107	491.834	364.697	426.381	231.706	229.105	0
20185	Ncor1	0	0	0	0	0	0	0	0	0	0	0	0	0	0	0	0	0	0	0	0	0	0	0	0	0	0	0	0	0	0	0	0	0	0	0	0	0	1.961	0	4.902	0	2.266	0	0	0
20186	Nr1h4	0	0	0	4.158	0	0	0	1.614	0	0	0	0	0	0	0	0	0	0	0	0	0	0	0	3.176	0	0	0	0	0	0	28.719	28.872	63.331	37.379	52.972	46.615	102.957	115.378	132.904	314.005	105.109	78.102	67.091	75.468	70.038
20230	Satb1	0	0	0	0	2.406	2.658	0	0	0	0	0	0	0	0	0	0	0	0	0	0	0	0	0	0	0	0	0	0	0	0	0	0	0	0	0	0	0	0	0	0	0	0	0	0	0
20588	Smarcc1	15.483	50.283	57.265	14.287	43.528	46.933	33.19	15.932	22.722	20.628	5.633	4.847	8.282	10.405	13.965	32.286	11.849	5.167	13.909	6.3	12.28	7.099	13.912	5.43	26.69	16.097	9.607	33.043	30.457	42.179	21.093	40.777	18.594	27.596	42.243	42.301	28.538	43.019	53.1	51.902	15.248	13.196	16.234	35.156	10.584
20602	Ncor2	0	0	0	0	0	0	0	0	0	0	0	0	0	0	0	0	0	0	0	0	0	0	0	0	0	0	0	0	0	0	0	0	0	0	0	0.201	0	1.418	42.559	14.482	0	0	0	0	0
20658	Son	16.79	24.088	22.662	45.198	39.382	52.149	32.985	256	69.877	28.873	43.814	17.936	101.426	114.547	79.797	89.18	36.815	37.28	16.998	45.85	33.816	21.919	74.599	57.248	40.081	47.684	67.437	102.611	106.634	128.473	74.371	119.03	82.764	50.136	64.194	58.54	26.822	20.67	23.861	35.759	51.027	62.664	42.556	38.02	55.762
20668	Sox13	8.624	6.729	2.774	3.728	0	0	3.425	3.803	0	0	0	0	0	0	0	0	0	0	0	0	0	0	0	0	0	0	0	0	0	0	0	3.235	0	0	0	0	0	0	0	0	0	0	0	0	0
20671	Sox17	0	0	0	0	0	0	0.614	0	0	0	0	0	0	0	0	0	0	0	0	0	0	0	0	0	0	0	0	0	0	0	0	0	0	0	0	0	0	0	0	0	0	0	0	0	0
20677	Sox4	0	0	0	0	0	0	0	0	0	0	0	0	0	0	0	0	0	0	0	0	0	0	0	0	0	0	0	0	0	0	0	2.854	0	0	0	0	0	0	0	0	0	0	0	0	0
20678	Sox5	36.618	31.47	32.669	19.862	0	0	0	0	19.788	0	0	0	0	0	16.398	0	0	14.956	0	0	0	0	6.697	6.633	0	0	5.651	0	0	15.718	0	14.771	0	23.265	0	40.105	22.199	18.984	22.905	21.87	11.776	10.639	0	0	19.052
20679	Sox6	79.778	56.009	64.528	47.753	39.914	46.339	15.489	18.403	0	0	0	0	0	0	0	0	0	0	0	0	0	0	0	0	0	0	0	0	0	0	8.026	12.176	0	0	0	0	0	0	0	0	0	0	0	0	0
20683	Sp1	0	0	0	0	0	0	0	0	0	0	0	0	0	0	0	0	0	0	0	0	0	0	0	0	0	0	0	0	0	0	0	0	0	0	0	0	6.64	0	0	0	0	0	0	0	0
20684	Sp100	0	0	0	0	0	0	0	0	0	0	4.805	0	0	2.04	0	0	0	0	0	0	0	0	0	0	0	0	0	0	0	0	5.501	21.937	0	0	0	0	0	0	0	161.353	0	0	0	0	0
20687	Sp3	524.683	449.763	294.71	544.872	227.043	247.786	399.046	452.723	174.046	297.165	146.662	114.522	221.206	143.258	240.907	0	67.969	0	0	0	54.366	0	148.878	151.018	149.449	246.716	139.935	252.955	92.463	152.066	127.088	187.079	100.076	304.862	180.517	313.565	207.119	215.014	172.891	125.788	130.873	109.841	64.7	97.25	64.71
20787	Srebf1	4.03	0	1.426	0	2.664	0	0	0	0	0	0	7.69	10.803	3.64	3.175	1.567	2.113	0	0	4.895	6.246	0	0	0	0	2.294	0	0	0	0	1.749	29.849	0	12.217	9.241	10.486	30.896	26.08	124.681	12.2	5.642	5.258	6.292	0	8.739
20788	Srebf2	2.532	26.786	18.677	0	0	26.226	0	0	14.067	0	0	0	0	0	0	0	0	0	0	0	0	0	0	0	0	0	0	0	0	0	2.142	1.954	0	0	0	0	14.989	0	42.404	0	0	18.56	0	0	0
20807	Srf	0	0.868	0	78.102	7.484	0	5.279	6.446	5.175	0	7.524	0	7.729	0	8.349	300.614	0	0	379.529	0	8.165	0	0	0	0	0	0	0	0	0	0	19.275	0	0	9.056	633.603	0	0	0	5.354	0	0	0	0	0
20833	Ssrp1	72.715	92.954	76.286	105.455	27.597	23.135	69.165	159.038	41.143	11.95	28.412	91.762	126.995	102.514	74.582	40.286	5.58	10.394	103.763	71.709	71.712	144.004	86.931	19.512	6.448	9.733	45.102	22.177	81.737	84.938	11.315	64.335	6.569	64.052	10.985	6.263	0	2.992	2.744	2.142	40.021	0	3.107	0	0
20846	Stat1	0	0	0	0	0	0	0	0	0	0	0	0	0	0	0	0	0	0	0	0	0	0	0	0	1.431	1.871	2.777	0	3.977	0	0	0	0	1.594	0	0	0	1.297	2.304	0	0	0	0	0	0
20847	Stat2	0	0	0	0	0	0	0	0	0	0	0	0	0	0	0	0	0	0	0	0	0	0	0	0	0	0	0	0	0	0	0	0	0	3.156	0	4.506	0	0	0	1.211	0	0	0	0	0
20848	Stat3	0	0	0	0	0	0	0	0	0	0	0	0.266	0	0	0	1.706	44.731	57.548	0	36.655	42.709	0	51.466	42.02	38.176	31.634	30.234	44.194	39.416	78.08	1.54	5.933	132.231	33.744	2.265	38.442	3.667	4.076	4.654	8.747	48.162	40.614	83.225	102.829	19.29
20850	Stat5a	0	0	0	0	0	0	0	0	0	0	0	0	0	0	0	0	0	0	0	0	0	0	0	0	0	0	0	0	0	0	0	0	19.999	0	0	0	0	0	0	21.755	0	0	0	0	0
20851	Stat5b	0	0	0	0	0	0	0	0	0	0	0	0	0	0	0	0	0	0	0	0	0	0	0	0	0	0	0	0	0	0	0	0	0	0	0	0	0	0	0	21.799	3.525	4.644	0	0	0
20893	Bhlhe40	0	0	0	0	0	0	0	0	0	0	0	0	47.624	0	0	6.849	0	7.284	6.218	8.266	0	2.682	0	0	0	0	0	0	0	0	18.265	11.094	0	14.163	0	66.633	78.791	8.128	76.953	74.406	3.306	0	0	0	0
21349	Tal1	120.196	208.544	182.21	106.818	211.286	235.088	86.565	38.409	160.504	78.198	17.286	23.295	0	103.645	111.343	61.072	59.893	71.698	18.461	37.007	35.625	0	2.99	0	43.073	34.756	35.577	14.061	17.434	15.172	5.141	0	0	0	0	0	0	0	0	0	0	0	0	0	0
21385	Tbx2	0	6.277	5.997	0	6.553	0	0	0	0	0	0	0	0	6.266	4.005	0	3.245	3.747	0	9.838	5.65	0	7.28	7.787	0	0	0	0	0	0	9.756	41.982	0	0	13.839	6.006	20.553	29.65	16.742	16.804	10.083	0	0	0	0
21386	Tbx3	17.96	20.859	24.486	5.778	23.647	12.128	3.393	4.866	2.972	0	0	0	0	0	0	0	0	0	0	6.434	4.428	5.395	0	0	6.362	0	2.157	6.081	8.309	0	8.896	50.148	27.626	14.662	19.533	20.708	67.396	53.64	72.939	56.178	18.912	58.132	18.078	19.351	23.899
21405	Hnf1a	29.968	31.584	83.951	38.402	106.189	145.195	53.962	24.912	132.599	12.062	0	0	5.252	1.944	1.212	30.365	7.65	7.016	17.74	84.501	66.314	27.212	25.87	25.891	245.932	246.843	227.08	258.652	339.241	69.143	338.301	365.942	196.777	248.382	500.445	506.365	608.4	684.083	718.787	1006.58	463.076	436.303	576.3	856.359	752.453
21406	Tcf12	17.647	14.675	16.639	20.58	20.344	12.676	16.999	7.557	0	7.658	4.836	7.001	8.18	7.045	9.444	12.479	5.624	0	12.765	11.164	7.277	11.416	6.752	5.171	0	5.589	6.205	9.049	6.051	6.658	0	15.595	0	2.76	0	2.765	1.359	2.286	2.901	0	0	0	0	0	0
21410	Hnf1b	12.437	8.746	11.16	13.342	5.318	5.658	8.327	0	0	0	0	0	2.093	1.839	0	2.376	2.719	0	0	0	0	0	0	0	9.598	13.954	11.172	25.939	25.154	22.842	66.412	59.204	23.163	41.571	37.104	43.087	50.578	53.251	48.682	104.089	25.484	25.807	31.163	28.474	0
21413	Tcf4	8.02	3.838	7.94	8.252	4.397	2.094	0	1.075	0	0	0	1.82	2.342	0	0	6.813	0	0	5.771	0	0	0	0	0	0	0	0	0	0	0	0	13.157	0	0	0	0	4.32	4.19	2.028	0	0	0	0	0	0
21414	Tcf7	0	0	0	0	0	0	0	0	0	0	0	0	0	0	0	0	0	0	0	0	0	0	0	0	0	0	0	0	0	0	0	0	0	0	0	0	0	0	194.281	0	0	0	0	0	0
21415	Tcf7l1	17.248	9.371	9.634	8.627	6.102	6.382	7.884	16.179	5.446	8.751	12.98	12.168	15.323	17.62	15.271	28.101	13.391	12.645	19.37	18.316	16.318	0	14.411	8.579	0	0	0	0	0	0	20.422	24.394	0	0	0	0	0	0	0	10.264	0	0	0	0	0
21416	Tcf7l2	8.74	19.448	27.11	0	10.81	13.782	0	0	11.909	0	8.194	0	0	23.15	15.53	10.9	12.995	14.506	11.785	56.002	42.803	11.756	72.674	58.843	12.21	18.647	18.052	30.602	30.806	35.089	29.622	15.412	0	0	23.936	24.276	13.679	25.245	25.537	29.753	44.408	29.257	19.665	11.24	24.537
21417	Zeb1	0	0	0	0.859	0	2.847	0.718	1.095	3.373	0	0	0	2.134	4.494	3.813	0	0	0	0	0	0	0	0	0	0	0	0	0	0	0	0	0	0	0	0	0	0	0	0	0	0	0	0	0	0
21422	Tfcp2	12.086	165.871	142.082	3.475	10.562	15.179	0	0	0	0	0	0	0	0	0	0	0	0	0	0	0	0	0	0	0.186	0	0	0	0	0	0	0	78.824	282.499	143.994	57.874	55.488	131.244	73.709	101.448	63.872	37.064	7.27	29.939	38.2
21423	Tcf3	55.886	131.282	99.865	22.468	53.378	67.805	25.049	10.116	48.072	16.224	11.194	14.067	13.031	43.842	43.97	22.559	39.047	28.63	11.677	6.176	30.041	28.584	23.548	21.641	15.584	11.765	15.503	0	11.795	0	16.129	12.57	0	0	0	0	0	0	0	0	0	0	0	0	0
21425	Tfeb	36.987	52.246	35.594	8.674	12.258	15.484	8.388	24.847	0	0	15.763	18.584	0	16.201	18.954	5.291	15.362	18.057	0	0	0	50.029	16.132	14.823	16.058	15.95	22.334	24.601	34.478	32.033	159.83	62.264	43.144	79.319	63.593	47.404	82.716	54.856	50.876	90.517	19.713	53.952	30.792	43.101	22.873
21426	Tfec	7.904	0	0	0	0	0	0	0	0	0	0	0	0	0	0	0	0	0	0	0	0	23.614	0	0	0	0	0	0	0	0	32.387	0	0	0	0	0	0	0	0	0	0	0	0	0	0
21428	Mlx	17.232	87.043	51.924	49.607	155.258	138.931	111.991	109.549	145.986	132.009	129.986	108.454	106.535	198.111	226.212	267.872	218.152	225.893	165.773	261.993	257.009	226.671	206.303	207.731	352.466	403.49	389.535	531.011	416.445	614.942	450.746	333.962	2275.37	1136.46	817.979	909.015	1777.8	1640.18	1557.16	1663.78	1927.39	1951.97	3260.56	2893.09	2942.82
21429	Ubtf	2660.84	2556.32	2228.91	2488.13	1442.27	1683.26	2884.49	2871.03	1439.55	1091.16	860.668	457.328	1054.45	1273.5	1163.49	1417.51	435.27	565.06	1339.09	730.402	778.465	1630.64	983.159	877.984	479.768	454.449	474.034	698.541	671.724	617.077	730.459	1139.84	317.988	547.832	499.704	645.635	850.728	740.715	670.449	1180.79	328.109	320.386	385.536	349.563	363.711
21676	Tead1	22.461	26.964	51.442	10.152	18.339	16.269	7.223	26.746	0	0	0	0	0	0	0	0	0	0	0	0	0	0	0	13.676	10.466	18.516	17.673	30.961	34.918	33.54	51.988	33.361	13.772	0	48.713	24.307	26.698	18.907	22.14	27.792	8.77	10.416	14.76	0	0
21678	Tead3	37.105	54.319	49.284	14.582	10.283	22.222	13.126	11.079	0	0	7.329	7.749	9.507	0	11.522	0	15.621	17.873	0	12.785	12.619	11.77	19.386	16.824	0	25.635	22.764	0	78.057	77.053	57.732	49.841	50.204	66.566	65.819	68.857	59.213	84.729	59.436	43.092	47.932	29.498	76.656	53.494	53.636
21749	Terf1	0.883	1.562	2.84	0	0	0	0	0	0	0	0	0	0	0	0	0	0	0	0	0	0	0	0	0	0	0	0	0	0	0	0	0	0	0	0	0	0	0	0	0	0	0	0	0	0
21750	Terf2	5.862	15.7	17.291	13.455	5.563	10.507	14.995	12.796	6.605	0	8.885	14.713	0	1.444	10.344	0	2.077	1.786	6.642	5.409	7.859	4.365	8.577	5.336	6.649	4.75	2.916	5.705	3.992	3.834	0	10.819	0	0	4.269	5.59	3.159	5.078	0	0	0	0	0	0	0
21780	Tfam	5732.47	3062.49	2751.4	2633.7	1577.8	1889.47	1560.37	1007.17	1080.41	1177.04	1082.66	1480.78	1323.75	2294.01	2039.32	2582.81	2853.49	3474.93	3838.59	5028.33	5270.95	9374.39	6408.49	5288.24	6996.6	7579.07	7850.45	12342.1	10893.2	10680.3	12683.5	9632.98	28327.1	21206	17413	18206.2	21406.2	21538.3	21533.3	16128.1	28956.3	30890.8	26001.9	26853.8	26513
21781	Tfdp1	39.562	78.202	63.039	44.205	52.708	52.581	52.543	91.606	32.617	24.621	30.274	34.79	22.827	46.803	37.754	44.454	32.465	36.743	17.316	25.903	21.233	15.388	12.063	14.546	0	0	0	26.117	0	0	18.161	45.924	0	0	0	0	11.008	0	12.208	2.945	0	0	0	0	0
21815	Tgif1	2.294	0	2.838	0	0	0	0	0	0	0	0	0	0	0	0	0	0	0	0	0	0	0	0	5.632	0	0	1.984	0	0	0	0	0	0	0	0	0	0	0	0	0	0	0	0	0	0
21833	Thra	6.993	10.962	9.292	5.813	8.026	10.092	0	23.782	7.547	0	0	3.953	4.777	0	9.987	0	4.459	8.238	0	0	2.366	0	0	0	0	0	0	0	0	0	0	3.907	0	0	0	0	9.96	0	8.94	11.864	6.953	0	0	0	0
21834	Thrb	0	0	0	0	0	0	0	0	0	0	0	0	0	0	0	0	0	0	0	0	0	0	0	0	0	0	0	0	0	0	5.788	1.963	6.163	61.852	71.621	4.68	13.032	43.812	13.862	21.395	13.194	11.382	9.625	0	10.094
22025	Nr2c1	65.185	53.331	37.074	30.563	12.411	16.487	6.558	34.94	0	0	0	0	0	0	0	0	0	0	0	0	0	0	0	0	0	0	0	0	0	0	0	0	0	0	0	0	0	0	0	30.691	0	0	0	0	0
22026	Nr2c2	295.387	121.373	99.55	139.681	45.364	51.102	72.828	99.79	44.904	3.701	11.569	9.196	17.515	37.733	21.735	0	21.346	14.754	0	0	6.403	6.211	8.477	7.376	18.516	5.329	6.839	0	0	23.258	6.366	12.307	60.156	19.862	29.517	21.604	37.119	66.497	33.932	88.064	69.649	48.739	22.218	37.851	41.852
22059	Trp53	0	0	0	3.603	0	0	3.105	0	0	0	0	0	0	0	0	0	0	0	0	0	0	0	0	0	0	0	0	0	0	0	0	0	0	0	0	0	0	0	0	0	0	0	0	0	0
22130	Ttf1	0	0.583	1.458	0	2.111	2.953	0	0	0	0	0	0	0	0	0	0	0	0	0	0	0	0	0	0	0	0	0	0	0	0	0	0	7.903	0	2.094	0	3.72	2.647	2.521	33.637	0	5.636	8.256	0	9.541
22221	Ubp1	106.353	676.101	584.453	20.051	89.025	98.921	8.455	0	20.67	11.752	0	0	0	2.735	16.403	2.312	25.376	23.91	0	2.841	0	1.512	0	21.119	6.565	1.66	7.01	17.204	26.089	25.679	0	38.239	343.694	260.127	371.755	374.83	324.693	289.721	298.709	455.249	315.377	297.319	256.949	283.065	247.39
22259	Nr1h3	0	0	0	0	0	0	0	0	0	0	0	0	0	0	0	0	0	0	0	0	0	0	0	0	0	0	0	0	1.623	0	0	0	417.56	122.063	0	16.648	99.317	78.196	8.477	68.915	9.065	13.66	295.771	0	478.796
22260	Nr1h2	1.019	1.153	0	2.826	0	0	1.885	0	0	0	0	0	0	0	0	0	0.296	0	0	0	0	0	0	0.35	0	0	0	1.71	1.697	0	2.021	0	0	8.477	0	18.044	0	4.387	8.352	77.508	22.826	23.16	8.304	0	10.468
22278	Usf1	520.192	443.491	475.652	325.136	126.635	280.168	312.127	153.066	213.497	135.77	102.099	203.139	199.254	198.519	111.256	271.585	91.254	100.595	293.919	34.487	66.904	205.457	163.383	140.379	0	20.006	10.196	24.292	13.944	31.886	405.583	264.974	89.765	127.599	126.921	125.373	151.425	173.96	116.836	473.261	186.458	177.06	117.422	116.444	151.081
22282	Usf2	271.263	199.206	195.968	230.429	88.835	0	0	0	0	0	0	0	0	0	0	0	0	0	0	0	0	0	0	0	0	0	0	0	0	0	0	0	0	0	0	0	0	72.942	74.818	0	0	0	0	0	0
22344	Vezf1	64.474	111.851	67.452	20.571	0	0	24.332	27.814	48.2	0	10.155	0	5.889	0	38.067	12.922	29.509	18.469	19.22	0	0	7.799	24.879	27.945	0	0	0	33.411	0	0	28.165	48.909	0	61.749	78.062	49.192	65.513	52.446	77.125	24.226	57.129	59.158	39.777	43.124	45.719
22404	Wiz	88.434	139.066	134.01	29.763	23.476	20.225	10.549	9.252	2.648	0	0	0	2.627	0	0	0	0	0	0	0	0	0	0	0	3.813	3.391	3.046	2.24	4.394	6.752	0	10.245	0	10.099	13.417	10.691	19.888	31.461	19.176	23.669	0	5.456	20.734	10.58	0
22433	Xbp1	5.851	2.279	0	12.113	0	0	0	0	0	0	0	0	0	0	0	0	0	0	0	0	0	0	0	0	0	0	0	0	0	0	0	0	0	0	0	0	19.446	13.801	18.99	29.354	27.837	20.666	0	12.727	0
22608	Ybx1	1387.15	2140.26	2193.12	1119.37	2006.92	2633.07	430.257	1255.08	1452.07	298.099	1003.16	291.904	702.11	980.822	638.814	0	496.897	1117.05	599.497	1127.62	632.947	682.183	1320.37	1199.25	2140.33	2493.12	2402.54	2650.21	2651.25	2393.3	1081.29	2581.22	1167.57	4467.54	2826.75	3550.98	629.704	597.393	612.395	1241.09	863.291	884.102	1476.31	1064.61	1445.44
22632	Yy1	142.896	611.956	477.507	251.797	767.027	1024.88	346.206	131.557	583.382	291.262	70.712	50.557	94.228	327.346	432.575	442.17	178.752	215.024	160.893	91.294	0	77.769	140.125	124.053	382.03	364.138	320.606	346.726	373.13	401.47	206.347	249.024	895.694	589.144	780.786	702.49	663.74	695.547	678.801	723.416	818.441	712.372	721.995	693.867	650.924
22642	Zbtb17	0	0.538	0	0	7.756	0	0	0	0	0	0	0	0	0	0	0	0	0	0	0	0	0	0	0	0	0	0	0	0	0	0	0	0.354	0.303	0	0	1.171	0.533	0.519	0	0	0.387	0	0	0
22661	Zfp148	83.797	174.22	148.501	46.045	44.861	50.209	19.106	16.865	12.058	4.413	0	0	0	12.803	11.607	17.977	12.236	11.371	20.65	19.439	12.695	21.974	32.214	25.98	79.443	74.886	73.005	99.823	111.412	101.809	77.546	60.54	156.751	264.67	303.264	266.983	248.667	218.401	231.847	258.121	178.005	149.501	144.926	159.998	117.345
22680	Zfp207	0	15.113	17.987	3.667	11.859	14.491	4.24	0	0	0	0	0	0	0	0	0	0	0	0	0	0	0	0	0	0	0	0	4.373	0	0	0	0	0	6.699	12.18	19.983	12.219	21.295	17.991	20.662	0	0	0	0	0
22720	Zfp62	0	0	0	2.948	0	0	2.891	1.533	0	0	0	1.116	5.632	0	1.926	0	1.253	0	0	0	0	2.428	0	0.269	0	0	0	0	0	0	2.019	0	0	0	0	0	0	0	0	0	0	0	0	0	0
22724	Zbtb7b	0	0	0	0	0	0	0	0	0	0	0	0	0	0	0	0	0	0	0	0	0	0	0	0	0	10.388	6.597	0	0	0	0	0	54.822	34.888	32.029	32.695	78.646	81.938	87.175	92.728	36.039	43.194	40.363	47	45.289
22761	Zfpm1	14.094	26.442	18.554	2.062	17.949	19.596	4.35	8.175	6.016	0	0	0	1.123	1.556	1.837	0	0	0	0	2.819	1.463	0	0	0	0	0	0	2.935	0	0	0	0.764	9.887	0	3.365	3.141	4.304	9.408	9.292	17.894	10.328	10.894	7.154	26.177	20.287
22764	Zfx	31.033	24.397	18.667	21.956	11.912	13.503	10.083	0	4.589	0	0	0	0	3.711	3.597	0	0	0	5.802	0	0	12.913	4.914	7.638	21.108	18.978	18.06	18.684	18.589	18.035	11.438	0	25.315	51.413	47.811	43.222	45.339	49.665	50.3	22.584	40.035	34.629	21.994	22.062	24.922
22770	Zhx1	0	0	0	0	3.362	0	1.887	2.921	0	2.069	2.522	4.355	6.799	2.239	3.156	0	0	0	0	3.072	4.351	3.673	0	0	0	0	0	0	0	0	0	20.217	9.373	11.048	6.523	0	15.92	16.803	10.528	37.221	16.058	19.874	7.796	0	3.37
22778	Ikzf1	43.586	44.017	43.186	9.092	28.42	30.863	13.584	7.747	19.612	0	7.075	0	9.76	13.193	0	0	9.844	0	0	0	5.416	4.732	0	7.831	13.486	10.719	12.668	0	13.776	10.902	0	10.866	0	0	0	0	0	0	0	0	0	0	0	0	0
22779	Ikzf2	3.576	0	3.344	0	0	0	0	0	0	0	0	0	0	0	0	0	0	0	0	0	0	0	0	0	0	0	0	0	0	0	0	0	0	0	0	0	0	0	0	0	0	0	0	0	0
22780	Ikzf3	0	0	0	0	0	0	0	0	0	0	0	0	0	0	0	0	0	0	7.688	0	0	4.663	8.221	6.895	5.978	4.059	4.791	0	0	0	0	4.785	0	0	0	0	0	0	0	0	0	0	0	0	0
22791	Dnajc2	0	6.324	7.194	2.627	13.487	3.647	9.967	11.074	26.32	5.478	7.008	9.001	6.14	7.736	22.565	12.068	3.193	10.967	0	4.651	5.72	1.894	6.021	5.225	12.446	10.157	3.823	6.649	11.425	0	0	4.261	0	0	2.56	3.131	0	2.428	0	0	0	0	0	0	0
23871	Ets1	0	0	0	0	0	0	0	0	0	0	0	0	0	0	0	0	0	0	0	0	0	0	0	62.351	0	0	0	0	0	0	0	58.104	0	0	0	0	15.544	0	0	0	0	2.967	0	0	0
23872	Ets2	0	0	0	0	0	0	0	0	0	0	0	0	0	0	0	0	0	0	0	15.779	13.558	0	22.967	19.136	0	0	0	0	0	0	0	0	0	0	0	0	0	0	0	0	0	0	0	0	0
23877	Fiz1	0	0	0	0	0	0	0	2.556	0	0	0	0	0	0	0	0	0	0	0	0	0	0	0	0	0	0	0	0	0	0	0	0	0	0	0	0	0	0	0	0	0	0	0	0	0
23942	Mta2	13.294	39.187	32.41	5.428	22.245	22.998	8.111	18.866	7.764	10.477	11.101	19.249	22.386	9.181	6.504	29.923	9.662	12.529	30.919	9.983	20.623	9.055	13.157	9.246	27.429	12.823	13.607	20.78	14.009	28.306	16.982	35.302	33.906	18.245	30.546	37.366	33.015	54.54	48.533	46.433	30.175	42.884	16.047	20.282	18.178
24136	Zeb2	11.203	37.546	4.897	2.546	8.145	7.936	4.176	0.517	8.25	3.661	0	0	3.333	4.663	6.85	5.568	6.015	1.811	0	1.724	1.313	0	2.008	3.009	0	6.234	3.341	6.207	8.372	14.846	5.008	17.324	13.062	3.11	9.925	0.529	6.13	7.192	3.316	3.71	1.984	2.702	0	3.924	9.084
26379	Esrra	161.087	92.898	65.688	144.132	53.285	67.613	61.411	93.718	31.213	28.947	38.204	16.64	45.783	41.992	44.852	34.761	53.617	62.826	40.725	24.704	25.198	42.676	99.343	76.667	127.648	72.604	73.915	118.021	97.612	89.689	356.392	238.134	638.73	657.946	672.492	536.984	736.882	704.848	783.663	1286.94	665.081	618.978	551.117	695.446	575.509
26381	Esrrg	0	0	0	0	0	0	0	0	0	0	0	0	0	0	0	0	0	0	0	0	0	0	0	0	0	0	2.599	10.294	6.203	0	70.526	118.394	4.791	222.221	95.937	102.301	151.683	152.76	186.888	13.03	5.772	5.718	0	3.83	0
26424	Nr5a2	13.928	0	2.645	1.623	0	0	0	0	0	0	0	0	0	0	0	0	0	0	0	0	0	0	0	0	0	0	0	0	0	0	0	0	0	43.383	39.156	31.935	67.697	73.474	69.747	164.319	50.181	35.683	0	18.562	35.373
26427	Creb3l1	0	0	0	0.62	0	0	0	0	0	0	0	0	0	0	0	0	0	0	0	0	0	0	0	0	0	0	0	0	0	0	0	0	0	0	0	0	0	0	0	0	0	0	0	0	0
27049	Etv3	0	1.87	0	0	0	0	0	0	0	0	0	0	0	0	0	0	0	0	0	0	0	0	0	0	0	0	0	0	0	0	0	0	0	0	0	0	0	0	0	0	0	0	0	0	0
27056	Irf5	0	0	0	0	0	0	0	0	0	0	0	0	0	0	0	0	0	0	0	0	0	0	0	0	0	0	0	0	0	0	0	0	0	0	0	0	0	0	0	23.535	1.676	0	0	0	0
27386	Npas3	0.74	0	0	0	0	0	0	0	0	0	0	0	0	0	0	0	0	0	0	0	0	0	0	0	0	0	0	0	0	0	0	0	0	0	0	0	0	0	0	0	0	0	0	0	0
29808	Mga	29.514	22.236	18.797	8.401	399.715	5.236	6.021	6.651	2.387	2.138	5.033	3.392	3.619	5.014	4.761	0	3.377	4.187	1.702	4.446	3.136	3.358	2.674	2.051	4.801	2.843	0	2.749	2.004	2.906	3.773	4.914	2.166	1.421	0.889	1.64	2.481	1.977	2.569	4.401	1.267	0.864	0.699	0	0
30046	Zfp292	12.433	4.332	3.956	2.854	3.794	2.375	2.313	3.603	1.553	0	0	0.472	0	0	0	1.223	0.366	0	1.778	0.294	0	0	0	0.153	0	0	0	0	0	0	1.595	7.874	0	0	0	0	0	0	0	0	0	0	0	0	0
30942	Hnf4g	36.41	18.035	19.479	44.538	0	0	25.882	36.515	0	0	0	0	53.57	0	0	0	0	0	0	0	0	0	0	0	0	0	0	0	0	0	75.618	0	0	0	0	0	0	0	0	0	0	0	0	0	0
50496	E2f6	5.925	25.016	27.15	3.443	12.496	5.797	0	2.625	0	0	0	1.143	0	0	0	0	0	0	0	0	0	0	0	0	0	0	0	0	0	0	0	0	0	0	0	0	0	0	0	0	0	0	0	0	0
50794	Klf13	39.713	56.555	36.221	67.836	72.234	75.964	50.371	41.158	35.355	82.45	0	0	31.338	46.905	42.103	34.202	20.585	2.231	58.491	0	33.155	41.608	77.531	68.203	51.412	28.998	30.714	22.137	51.726	29.518	14.047	49.274	0	54.77	46.801	49.373	42.121	69.626	42.432	13.307	20.266	11.501	0	0	0
50907	Preb	0	0	0	0	0	0	4.438	6.192	6.889	8.53	25.71	19.055	51.865	33.379	19.209	272.856	27.818	32.984	102.081	42.862	39.437	9.586	16.903	10.603	7.301	16.839	8.168	24.438	26.109	50.461	17.773	155.083	29.15	31.956	15.239	25.381	6.088	21.794	14.347	37.624	18.486	24.975	43.706	64.48	61.626
52397	Zfp644	381.972	49.226	74.265	1.649	0	0	1.356	1.512	0	0	0	0	0	0	0	0	0	0	0	0	0	0	0	0	0	0	0	0	0	0	0	0	0	0	0	0	0	0	0	0	0	0	0	0	0
52679	E2f7	0	0	0.176	0	0.542	0.48	0.127	0.77	0	0	0.085	0	0	0.321	0	0	0	0.153	0	0	0	0	0	0	0	0	0	0	0	0	0	0	0	0	0	0	0	0	0	0	0	0	0	0	0
53417	Hif3a	0	0	0	0	0	0	5.22	8.786	0	32.501	27.317	44.454	38.981	48.903	37.416	42.892	27.186	35.651	26.162	9.823	0	0	0	0	0	0	0	0	0	0	0	0	0	0	0	0	0	0	0	0	0	0	0	0	0
53970	Rfx5	4.585	9.101	5.762	3.404	14.745	11.421	0	20.11	1.757	0	33.706	8.588	43.427	28.849	19.67	6.25	6.764	3.992	12.167	30.443	1.115	1.603	6.945	20.318	33.726	16.112	13.718	23.029	26.103	25.196	38.415	30.069	30.783	33.915	32.951	68.552	29.313	38.692	39.193	77.371	18.174	20.013	23.036	25.527	12.172
54006	Deaf1	0	7.241	12.175	0	0	0	0	0	0	0	0	0	0	0	0	0	0	0	0	0	0	0	0	0	0	0	0	0	0	0	0	0	0	0	0	0	0	0	4.125	5.454	0	0	0	0	0
54131	Irf3	11.35	38.807	39.798	13.401	57.974	68.279	34.325	22.686	72.651	43.552	36.543	21.671	26.004	86.163	78.103	55.475	112.319	114.205	59.068	171.228	175.557	35.795	55.829	75.785	75.431	86.789	77.708	115.968	103.408	133.047	76.357	47.407	390.326	151.799	125.088	187.38	135.538	215.217	185.171	284.456	578.273	495.662	374.382	652.639	554.241
54367	Zfp326	0	2.352	1.426	0	0	0	0	0	0	0	0	0	0	0	0	0	0	0	0	0	0	0	0	0	0	0	0	0	0	0	0	0	0	13.579	13.841	36.102	0	0	0	22.015	12.874	6.942	9.203	0	8.814
54380	Smarcal1	1.77	10.953	10.226	15.873	54.914	54.423	39.114	74.945	92.319	22.691	87.245	56.66	111.594	123.682	106.281	38.175	104.532	114.606	33.976	69.595	65.64	31.514	66.705	51.177	45.139	39.053	16.327	9.871	8.637	11.629	22.017	26.513	99.798	3.081	44.781	4.341	10.173	8.121	55.02	34.013	29.704	30.174	114.559	36.987	114.435
54446	Nfat5	0	0	0	2.257	4.31	11.572	3.256	0	12.649	3.005	0	6.527	6.961	7.14	7.434	0	6.71	5.218	4.052	8.276	7.826	2.099	7.1	6.54	6.164	5.809	5.039	21.069	8.454	25.068	33.075	8.343	14.632	32.113	21.834	28.263	14.771	21.937	12.675	33.502	22.303	13.813	14.185	17.786	27.941
54601	Foxo4	0.898	0	0	6.352	0	0	7.155	17.809	5.725	4.775	8.714	0	14.716	3.849	5.176	0	2.963	0	15.66	2.779	0	0	0	0	0	0	0	0	0	0	7.24	4.342	0	0	0	0	0	0	0	15.833	6.476	0	0	0	0
55927	Hes6	0	0	0	0	0	0	0	0	0	0	0	0	0	0	0	0	0	0	0	0	0	0	0	0	0	0	0	0	0	0	0	0	0	0	0	0	0	0	0	7.421	0	0	0	0	0
56218	Patz1	45.214	59.631	37.265	0	42.347	52.259	0	10.618	28.769	0	0	0	6.045	0	21.295	9.643	16.82	8.462	0	0	0	0	0	0	0	0	0	0	0	0	0	14.708	0	32.431	32.86	0	31.72	13.916	33.318	0	0	0	0	0	0
56380	Arid3b	0	2.707	2.432	0	0	0	0	1.683	0	0	4.979	3.968	3.387	4.762	4.486	0	0	5.59	2.582	0	0	0	0	0	0	0	0	0	0	0	0	0	0	0	0	0	0	0	0	0	0	0	0	0	0
56449	Ybx3	653.451	505.885	570.42	755.792	884.585	1167.45	507.125	1019.27	1047.6	138.599	672.501	275.012	402.298	514.889	656.394	394.47	482.096	678.654	308.568	596.72	538.22	368.24	656.701	616.222	815.874	991.127	1076.95	1252.87	762.983	698.393	474.646	1386.5	380.015	1221.18	806.563	901.598	267.178	256.978	273.87	373.756	262.781	212.738	339.669	371.05	0
56458	Foxo1	0	0	0	0	136.898	196.826	170.414	10.909	0	5.823	11.271	10.469	14.748	303.549	313.889	14.938	305.201	392.649	25.518	19.594	0	10.141	378.235	360.221	0	0	0	568.854	0	0	423.251	25.054	0	632.053	3481.77	560.977	403.903	3072.93	450.663	86.421	35.385	595.299	0	0	0
56469	Pias1	0	6.496	5.502	0	3.744	5.859	2.783	3.421	7.899	0	0	0	7.448	0	0	0	0	0	0	1.551	0	0	0	0	8.122	2.326	9.223	2.49	31.662	11.742	6.461	10.861	0	0	4.221	0	12.543	1.889	6.14	23.822	11.971	13.808	4.228	0	0
56484	Foxo3	5.795	1.591	0	11.746	31.528	54.344	24.133	41.125	36.163	19.267	71.479	73.324	71.402	71.781	62.336	39.246	48.16	32.565	23.389	11.525	37.43	0	11.903	14.165	0	0	0	0	0	0	0	17.935	0	0	0	0	0	0	0	0	0	0	0	0	0
56490	Zbtb20	0	0	0	0	0	0	0	0	0	0	0	0	0	0	0	0	0	0	0	0	0	0	0	0	2.473	0	0	2.239	6.674	8.785	11.411	36.62	800.908	222.361	232.23	206.311	410.151	446.822	404.083	1476.09	1208.61	1131.38	545.483	479.043	485.245
56501	Elf4	50.657	36.335	30.126	42.652	0	0	29.336	31.449	0	23.878	32.184	39.698	32.547	15.17	13.99	25.884	16.022	8.519	41.674	26.147	21.055	82.688	30.811	25.286	18.401	20.375	12.658	0	0	21.398	30.244	51.833	0	17.386	17.488	15.881	0	0	14.6	0	0	0	0	0	0
56809	Gmeb1	0	0	16.124	3.125	7.454	6.853	6.428	0	0	0	0	0	0	0	0	0	4.623	5.658	0	4.397	0	0	0	0	0	0	0	0	0	0	0	0	0	0	0	0	0	0	0	0	0	0	0	0	0
57080	Gtf2ird1	0	0	0	0	0	0	0	0	0	0	0	0	0	0	0	0	0	0	0	0	0	0	0	0	0	0	0	0	0	0	0	0	0	0	0	0	0	0	0	2.087	0	0	0	0	0
57247	Zfp276	0	0	0	0	0	0	0	0	0	0	0	0	0	0	0	0	0	0	0	0	0	0	0	0	0	0	0	0	0	0	0	0	0	0	0	0	3.483	0	3.966	0	2.883	0	0	0	0
57376	Smarce1	18.593	55.519	58.321	12.411	40.014	42.375	28.939	7.59	33.082	10.097	0	0.557	7.561	21.084	20.319	7.575	14.891	10.498	5.787	8.693	5.727	14.51	17.557	10.775	50.347	46.279	51.518	92.035	51.822	42.239	53.663	79.559	47.261	69.999	60.986	90.771	99.976	94.35	111.299	133.627	44.036	51.429	53.014	61.689	21.298
58180	Hic2	30.475	48.816	30.69	0	0	0	0	0	0	0	0	0	0	0	0	0	0	0	0	0	0	0	0	0	0	0	0	0	0	0	0	0	0	0	0	0	0	0	0	0	0	0	0	0	0
58198	Sall1	0	0.271	0	0	0.333	0	0	0	0	0	0	0	0	0	0	0	0	0	0	0	0	0	0	0	0	0	0	0	0	0	0.781	5.093	0	1.229	2.849	0	5.61	5.053	3.567	36.855	0	0	0	0	0
58805	Mlxipl	2.495	17.207	11.604	10.084	23.079	29.996	13.899	28.11	15.922	13.224	25.001	21.81	23.896	30.275	28.995	32.114	36.71	31.6	20.885	45.66	26.474	30.83	32.328	23.11	60.148	63.468	58.241	70.964	87.22	99.826	131.632	79.774	615.898	153.608	170.628	138.092	389.461	327.845	344.135	662.78	543.327	409.395	590.742	671.664	613.879
58887	Repin1	0	0	0	0	0	0	0.887	0	0	0	0	0	0	0	0	0	5.825	0	1.032	3.886	0	0	8.771	5.87	0	0	0	0	0	0	0	4.049	0	0	0	0.666	0	0	0	0	0	0	0	0	0
59004	Pias4	4.631	93.531	81.646	9.575	56.146	47.69	11.879	0	0	3.003	0	0	0	0	0	0	4.523	4.719	0	3.999	3.896	0	0	0	0	2.875	0	4.968	0	0	2.174	0	0	5.487	7.391	7.096	3.655	4.155	0	11.095	55.897	3.812	0	0	0
59016	Thap11	0	0	0	0	14.735	0	0	0	0	0	0	0	0	0	0	0	0	0	0	0	0	0	0	0	0	0	0	0	0	0	0	0	0	0	0	0	0	16.371	0	33.8	0	0	0	0	18.396
60611	Foxj2	0	1.678	0	0	2.282	5.31	0	0	0	0	0	4.341	0	7.032	0	0	49.44	7.27	0	0	0	0	7.552	6.591	0	0	0	0	0	0	0	4.775	0	0	0	0	0	0	0	0	3.626	0	0	0	0
64050	Yeats4	0	9.37	7.949	2.776	8.979	8.73	3.765	0	0	0	0	0	0	0	0	0	0	2.761	0	0	2.901	0	0	0	0	0	0	0	0	0	0	6.17	0	0	0	0	0	0	0	0	0	0	0	0	0
64453	Zfp280b	0	0	0	0	0	0	0.651	0	0	0	0	1.287	0	0	0	0	0	0	0	0	0	0	0	0	0	0	0	0	0	0	0	0	0	0	0	0	0	0	0	0	0	0	0	0	0
66867	Hmg20a	127.124	53.385	67.423	64.057	156.607	26.716	12.569	13.766	0	0	0	0	0	90.279	7.726	0	0	0	0	8.275	12.271	0	9.444	10.204	82.58	122.794	138.189	165.993	143.259	178.554	217.085	199.314	14.36	395.298	169.376	388.273	96.174	149.099	77.194	73.75	0	18.926	24.134	34.636	34.009
66923	Pbrm1	8.588	21.98	24.641	9.363	31.581	32.869	10.061	13.241	13.287	11.701	2.007	5.224	27.819	5.095	10.321	8.762	16.987	8.497	8.863	9.826	14.647	5.146	5.945	8.826	37.429	27.81	24.387	27.622	28.935	28.046	25.195	26.97	8.112	47.288	39.559	58.189	35.96	37.813	30.983	50.848	17.042	13.12	15.705	13.063	10.936
67109	Zfp787	0	0	0	0	0	0	0	0	0	4.303	0	0	0	0	0	0	0	0	0	0	0	0	0	0	0	0	0	0	0	0	0	32.512	0	0	0	0	0	0	0	13.485	0	0	0	0	0
67210	Gatad1	0	4.064	2.776	0	0	0	0.795	0	0	0	0	0	0	0	0	0	0	0	0	0	0	0	0	0	0	0	0	0	0	0	0	0	0	0	0	0	0	0	0	7.652	0	0	0	0	0
67255	Zfp422	0	0	0	0	0	0	0	0	0	0	0	0	0	11.182	0	0	0	6.476	0	17.595	20.812	0	46.787	26.368	0	0	0	0	0	0	0	23.687	0	8.868	21.032	0	0	0	0	3.982	0	0	0	0	0
67367	Paxbp1	0	0	0	0	0	0	0	0	0	0	0	0	0	0	0	0	0	0	0	0	0	0	0	0	0	0	1.001	0	0	0	0	0	0	1.235	4.099	0	1.687	0	0	0	0	0	0	0	0
68094	Smarcc2	4.693	31.424	43.96	7.229	43.022	41.816	15.194	7.056	32.774	4.332	0.727	1.105	2.377	8.999	13.393	4.603	9.54	3.354	3.717	18.581	12.464	6.077	22.513	16.111	63.001	51.751	34.143	106.141	88.712	98.926	36.044	54.295	136.396	176.689	153.958	153.198	139.418	165.441	162.517	168.548	65.234	74.071	74.434	111.462	74.825
68750	Rreb1	32.332	48.278	46.534	13.66	23.431	29.808	12.125	5.82	9.722	12.098	5.09	7.586	4.923	13.962	12.836	20.713	19.228	19.254	19.043	14.254	12.169	14.656	11.203	8.656	15.188	15.301	17.153	29.509	34.315	34.156	49.371	56.034	61.075	83.571	80.468	70.16	74.343	77.632	92.472	65.619	63.691	151.079	35.438	72.558	63.907
68837	Foxk2	14.528	41.294	29.857	25.905	47.61	67.017	40.29	43.938	54.774	31.229	36.511	20.006	34.625	50.038	52.99	51.078	47.116	37.566	0	48.907	21.385	0	44.568	52.86	17.518	19.649	15.291	28.448	56.263	58.259	9.724	9.585	0	23.227	29.349	31.794	47.091	46.98	0	0	46.223	54.077	0	0	0
69257	Elf2	64.429	73.565	63.645	75.622	18.909	59.231	84.758	142.998	37.998	34.919	100.687	38.135	84.724	64.903	66.094	43.948	76.629	46.585	50.649	66.428	56.623	64.148	72.746	63.264	41.574	60.674	54.587	85.429	16.961	42.633	88.067	69.408	24.857	107.332	104.523	103.013	96.164	92.336	88.072	155.405	20.994	22.343	23.362	28.054	27.067
69890	Zfp219	6.278	6.919	4.348	0	5.287	10.53	2.741	3.775	3.155	0	0	0	0	1.172	0	0	2.108	1.633	0	0	0	0	0	0	0	0	0	0	1.481	0	0.366	10.16	3.293	11.235	7.559	6.178	9.555	0	16.112	13.362	4.93	0	1.51	1.597	1.822
71268	Lrrfip2	0	24.598	8.055	0	210.462	283.599	216.612	47.554	232.857	1.434	3.542	1.874	16.318	303.718	273.897	3.979	441.706	435.783	4.116	295.486	3.443	0	248.18	237.018	62.127	43.056	55.705	646.216	799.269	61.746	15.323	38.812	1552.4	170.492	116.604	1150.4	284.44	252.614	278.14	503.532	213.09	1253.36	1253.51	1344.7	1262.8
71371	Arid5b	0	0	0	0	0	0	0.499	0	0	0	0	0	0.423	0	0	0	1.769	1.961	1.812	0	0	2.967	0	0	0	0	0	0	0	0	0	1.677	1.492	2.63	0	0	2.297	0	1.707	14.591	0	0	0	0	0
71375	Foxn3	0	3.369	0	2.531	0	0	0	0	0	0	0	0	0	0	0	0	0	0	0	0	0	0	0	0	0	0	0	0	0	0	0	0	0	0	0	0	0	0	0	0	0	0	0	0	0
71702	Cdc5l	0.482	19.246	21.476	1.166	4.532	5.748	9.359	6.739	24.792	0	7.48	0	0	20.249	26.189	22.572	4.926	5.529	0	24.788	25.397	16.706	47.606	39.409	13.299	21.348	23.378	31.755	15.142	52.984	8.181	10.231	357.255	229.797	252.826	261.742	25.752	257.952	32.289	26.874	213.959	17.688	276.155	260.959	280.168
72567	Bclaf1	13.492	62.499	48.643	7.653	1.774	4.223	2.461	17.083	4.435	0	5.502	0	0	2.524	3.166	6.613	0	0	0	0	0	0	4.656	1.87	0	0	0	0	0	0	0	0	0	11.2	10.85	8.941	9.304	9.163	24.981	0	11.324	14.041	15.759	22.467	22.238
72611	Zfp655	2.213	0	0	0	0	0	2.018	1.972	0	0	0	0	0	0	0	0	0	0	0	0	0	0	0	0	0	0	0	0	0	0	0	0	0	0	0	0	0	0	0	43.97	0	0	0	0	0
72739	Zkscan3	0	0	0	0	0	0	0	0	0	0	0	0	0	0	0	0	0	0	0	0	0	0	0	0	0	0	0	0	0	0	0	0	0	0	0	0	0	1.21	1.426	0	9.474	29.431	26.635	0	49.911
73181	Nfatc4	1.539	2.648	2.453	0	0	1.041	0	0	0	0	0	0	0	8.105	6.07	4.196	8.519	4.827	4.986	8.424	3.759	13.575	5.239	3.607	0	0	1.424	3.308	4.566	0	6.284	2.716	0	0	0	4.768	0	0	1.149	6.723	0	0	0	0	5.385
73389	Hbp1	0	0	0	0	0	0	0	0	0	0	0	0	5.969	0	0	0	9.866	14.782	0	10.795	9.132	0	18.472	14.231	0	0	0	0	0	0	0	11.78	16.13	0	0	0	0	0	0	6.147	0	0	0	0	13.652
73754	Thap1	32.315	18.538	6.951	0	6.014	6.503	5.017	0	0	0	0	0	0	0	0	0	0	0	0	0	0	0	0	0	0	0	0	0	0	0	0	15.783	0	0	0	0	6.09	0	6.832	0	0	0	0	0	0
74123	Foxp4	1.777	5.083	5.017	1.761	5.18	6.316	4.662	5.325	1.995	2.307	2.985	4.68	10.543	0	3.6	0	0	6.838	0	3.16	1.635	0	0	0	3.406	2.622	2.57	0	0	0	8.185	57.124	15.763	7.396	8.864	8.065	14.149	12.091	10.548	48.1	12.346	22	11.029	12.382	11.15
74570	Zkscan1	0	0	0	0	0	0	0	0	0	0	0	0	0	0	0	0	0	0	0	0	0	0	0	0	0	0	0	0	0	0	0	0	0	0	0	3.557	0	0	0	0	0	0	0	0	0
76022	Gon4l	0	0	0	0	0.237	0	0	0	0.44	0.816	0	0.341	0	0	0	0	0	0	0	0	0	0	0	0	0	0	0	0	0	0	0	0	0	0	0	0	0	0	0	0	0	0	0	0	0
77044	Arid2	1.658	7.364	8.995	1.016	8.799	10.551	0.702	1.56	3.824	1.505	0	0	0	0.883	0.992	0	0	0.463	0.651	0	0.719	0	0.777	1.302	2.925	7.414	5.019	6.728	6.201	4.421	2.735	5.137	0	6.214	9.672	8.519	7.488	8.115	8.788	8.702	3.461	3.256	1.529	2.634	0
77519	Zfp266	0	0	0	0	0	0	0	0	0	0	0	0	0	0	0	0	0	0	0	0	0	0	0	0	0	0	0	0	0	0	0	0.847	0	0	0	0	0	0	0	0	0	0	0	0	0
77862	Thyn1	49.686	241.877	180.174	41.051	120.659	124.389	13.424	12.366	0	0	0	0	0	0	0	0	0	0	0	0	0	2.175	0	0	78.108	71.129	65.765	81.665	61.671	54.55	69.319	69.646	240.099	149.629	130.699	191.584	183.658	285.605	255.047	297.721	315.497	289.513	250.083	159.086	213.475
78266	Zfp687	5.157	4.884	7.526	5.852	6.651	11.489	0	2.134	0	0	0	0	0	0	0	0	0	0	0	0	0	0	0	0	3.435	5.304	2.004	5.872	0	4.244	0	9.089	3.651	3.62	3.035	5.087	2.76	5.992	0	4.872	2.033	1.351	0	0	13.968
78912	Sp2	7.695	2.236	3.433	0	0	0	0	0	0	0	0	0	0	0	0	0	0	0	0	0	0	0	0	0	0	0	0	0	0	0	0	0	0	0	0	0	0	0	0	0	0	0	0	0	0
80892	Zfhx4	6.474	1.16	0.765	0	0.178	0	0	2.167	0	0	0	0	0	0	0	0	0	0	0	0	0.327	1.433	0	0	0	0	0	0	0	0.442	0	1.666	0	1.329	0.983	1.108	0.648	0.805	0	6.042	0	0	0	0	0
81879	Tfcp2l1	0	30.869	0	0	0	0	0	0	0	0	0	0	0	0	0	0	0	0	0	0	0	0	0	0	0	0	0	0	0	0	0	0	0	0	0	0	0	0	0	20.318	0	0	0	0	0
83383	Tfap4	273.864	152.823	198.769	162.263	88.986	101.04	118.391	200.893	41.474	27.61	94.38	84.32	84.23	40.124	66.042	37.071	25.383	42.036	55.293	34.46	66.031	50.566	28.086	26.104	14.709	7.072	9.31	10.792	8.297	0	148.432	47.965	0	0	3.969	3.302	0	5.843	3.79	5.998	0	0	0	0	0
83925	Trps1	4.912	5.857	4.624	0.42	0	0	0.667	0.82	0	0	0	0	0	0	0	0	0	0	0	0	0	0	0	0	0	0	0	0	0	0	0	0	0	0	0	0	0	0	0	0	0	0	0	0	0
93760	Arid1a	3.585	33.932	19.562	2.377	13.316	21.883	10.465	10.151	14.563	5.361	9.163	13.863	15.621	6.078	6.651	7.831	10.928	12.052	4.032	6.138	4.337	0	4.395	4.395	12.743	10.262	10	14.9	14.614	16.598	7.333	14.746	6.566	15.908	17.478	18.26	13.556	18.305	17.267	23.141	8.724	5.471	10.682	7.479	6.66
93761	Smarca1	255.537	233.674	222.341	129.369	213.266	233.264	179.713	187.633	235.993	120.091	96.385	131.057	157.158	166.349	178.546	150.182	145.456	149.869	159.432	204.502	150.845	117.548	153.089	110.145	117.751	96.318	83.916	125.985	143.988	116.86	143.726	91.688	0	86.251	0	116.034	57.341	77.381	0	68.327	0	0	0	0	0
94246	Arid4b	2.561	1.221	0	0.459	0	0	0	0	0	0	0	0	0	0	0	0	0	0	0	0	0	0	0	0	0	0	0	0	0	0	0	0	0	0	0	0	0	0	0	0	0	0	0	0	0
97165	Hmgb2	18750.8	16400.3	17227.6	31365.9	27791.4	28730.4	38209.7	34003	36167.2	55099.3	49210.1	57169.6	53781.6	40771.7	41179.5	45160.8	38517.6	35131.7	37421.9	31305.1	34225.8	34566.1	27686.8	32639.4	29805.4	29099	25346.1	20670	20508.6	22734.6	15083	22283.1	3727.52	9673.49	9142.64	10824.8	7006.17	7495.7	7609.63	4369.18	3432.25	3134.59	5119.57	2161.27	2415.33
98999	Znfx1	0	0	0	0	0	0	0	0	0	0	0	0	0	0	0	0	0	0	0	0	0	0	0	0	0	0	0	0	0	0	0	2.049	2.241	0.829	0	0	0	1.169	1.408	3.233	1.845	3.548	5.169	1.738	3.907
99377	Sall4	1.936	3.095	2.892	0	0	0	0	0	0	0	0	0	0	0	0	0	0	0	0	0	0	0	0	0	0	0	0	0	0	0	0	0	0	0	0	0	0	0	0	0	0	0	0	0	0
100090	Zbtb48	4.459	4.568	2.862	5.418	0.748	0	0	0	0	0	0	0	0	0	0	0	0	0	0	0	0	0	0	0	0	0	0	0	0	0	0	0	0	2.28	0	30.224	18.453	2.597	12.605	2.914	0	0	0	0	0
100978	Nfxl1	0	0	0	0	0	0	0	0	0	0	2.699	0	11.045	0	0	0	0	0	2.308	0	0	0	0	0	0	0	0	0	0	1.452	0	4.225	0	0	0	0	0	0	0	1.267	0	0	0	0	0
104383	Rcor2	11.985	26.148	9.877	0	7.339	0	0	0	0	0	0	0	0	0	0	0	0	0	0	0	0	0	0	0	0	0	0	0	0	0	0	0	0	0	0	0	0	0	0	0	0	0	0	0	0
104394	E2f4	72.448	158.673	117.239	138.063	328.521	324.848	228.006	393.121	315.728	221.38	293.129	329.152	276.888	157.364	150.513	169.798	126.641	140.714	95.618	69.268	67.877	62.946	40.828	31.477	69.611	69.99	68.774	68.153	71.485	71.627	74.203	85.554	39.448	37.189	50.354	16.379	33.723	45.146	42.53	62.61	40.766	34.328	34.959	13.656	44.984
108655	Foxp1	31.01	56.994	37.474	30.482	46.321	59.596	30.461	29.94	45.325	30.128	0	10.341	61.59	44.937	42.969	56.153	31.057	67.364	66.761	46.348	22.482	16.066	48.143	44.661	32.849	35.244	41.228	43.316	43.145	43.767	38.785	97.618	93.148	84.04	56.243	91.965	93.923	73.361	93.377	199.058	96.11	84.319	42.697	60.117	57.597
108899	2700081O15Rik	8.54	2.645	2.565	2.679	0	0	0	0	0	0	0	0	0	0	0	0	0	0	0	0	0	0	0	0	0	0	0	0	0	0	0	0	0	0	0	0	0	0	0	0	0	0	0	0	0
108961	E2f8	2.44	1.427	0.844	0	2.128	1.091	125.872	97.092	0	0	115.028	32.309	54.402	0.545	1.172	0	0	0	0	0	0	0	0	0	0	0	0	0	0	0	0	0	0	0	0	0	0	0	0	0	0	0	0	0	0
109032	Sp110	3.514	0	0	9.399	0	0	14.409	0	0	0	0	0	0	0	44.432	12.096	0	11.17	22.512	16.163	13.844	23.15	0	23.514	0	34.607	0	0	0	0	33.527	28.521	0	0	0	0	0	0	0	0	0	0	0	0	0
109263	Rlf	2.633	5.277	4.16	4.182	5.436	8.899	4.034	5.067	2.551	0	0	2.49	0	0	0	0	0	0	0	0	0	0	0	0	6.617	3.042	0	2.534	0	0	0.831	2.963	0	0	0	0	0	0	0	0	0	0	0	0	0
109910	Zfp91	1.33	0	0	0	0	0	0	0	0	8.77	0	0	0	0	0	12.416	0	0	20.181	0	0	0	0	0	0	0	0	0	0	0	0	0	0	0	0	0	0	0	0	0	0	0	0	0	0
110593	Prdm2	5.068	0	3.041	1.514	0.067	0.453	1.197	0	0	0	0	0	0	0	0	0	0	0	0	0	0.709	0	0	0	0	0	0	0	0	0	0	0	3.683	28.456	21.605	11.094	4.207	4.23	19.411	8.964	7.258	16.994	3.076	33.755	31.67
110794	Cebpe	7.152	0	0	6.602	0	0	0	0	0	0	29.011	20.512	0	0	0	34.072	0	0	21.086	0	0	49.87	0	0	0	23.074	0	0	36.56	33.276	56.396	0	0	0	0	0	0	0	0	0	0	0	0	0	0
114565	Zbtb21	1.763	0	0	0	0	0	0	0	0	0	0	0	0	0	0	0	0	0	0	0	0	0	0	0	0	0	0	0	0	0	0	0	0	0	0	0	0	0	0	0	0	0	0	0	0
116848	Baz2a	6.836	4.29	6.284	2.518	8.839	7.112	4.48	4.314	5.138	6.313	5.118	8.911	4.048	8.364	7.521	11.661	9.036	11.737	11.427	22.817	16.57	7.822	13.071	16.182	13.852	4.366	14.176	19.717	18.379	27.047	24.134	21.042	5.144	5.752	8.93	6.473	14.493	95.992	94.964	68.472	2.754	6.595	7.813	6.008	8.61
116870	Mta1	5.753	11.238	17.712	5.697	2.556	3.18	3.429	2.489	0	1.493	0	2.188	0	0	1.312	4.477	0	0	12.959	2.028	0	1.024	0	0	0	0	0	0	4.091	4.083	1.686	0	0	5.848	6.182	0	2.503	13.419	11.463	14.574	2.521	3.386	0	0	0
116871	Mta3	0	11.75	10.505	1.988	6.54	0	0	7.066	0	0	0	4.696	5.431	0	0	5.465	0	0	12.469	0	0	0	0	0	0	0	0	6.492	0	0	5.449	12.412	0	8.214	8.876	0	9.22	13.021	0	18.09	0	0	0	0	0
195522	Zfp691	0	0	0	0	0	0	0	0	0	0	0	0	0	0	0	0	0	0	0	0	0	0	0	0	0	0	0	0	0	0	0	0	0	0	0	0	0	0	0	6.065	5.193	0	0	0	0
208076	Pknox2	0	0	0	0	0	0	0	0	0	0	0	0	0	0	0	0	0	0	0	0	0	0	0	0	0	0	0	0	0	0	0	186.819	0	0	0	0	0	0	0	0	0	0	0	0	0
208104	Mlxip	1.166	0	0	0	1.855	0	0	0	0	0	0	0	0	0	0	0	0	0	1.569	0	0	1.559	0	0	0	0	0	0	0	0	0	7.113	0	0	0	0	5.484	0	0	0	0	0	0	0	0
208292	Zfp871	0	0	0	0	0	0	1.051	0	0	0	0	0	0	0	0	0	0	0	0	0	0	0	0	0	0	0	0	0	0	0	0	0	0	0	0	0	0	0	0	0	0	0	0	0	0
208677	Creb3l3	0	0	0	0	0	0	0	0	0	0	0	0	0	0	0	0	0	0	0	7.643	7.37	0	36.209	23.868	0	0	4.036	6.889	0	0	21.615	35.269	79.398	0	65.486	0	3.905	0	0	38.057	9.81	6.293	3.818	0	0
208968	Zfp280c	2.181	2.036	2.371	2.653	0	2.534	2.063	0	0	0	0	0	0	0	0	0	0	0	0	0	0	0	0	0	0	0	0	0	0	0	3.518	3.943	0	0	0	0	0	0	0	0	0	0	0	0	0
209225	Zfp710	0	0	0	0	0	0	0	0	0	0	0	0	0	0	0	0	0	0	0	0	0	0	0	0	0	0	0	0	0	0	0	7.355	0	0	0	0	0	0	0	3.692	0	0	0	0	0
209446	Tfe3	29.42	45.623	24.141	10.154	0	7.982	0	0	0	0	0	0	0	0	0	0	0	0	0	0	0	0	0	0	12.218	13.248	0	0	22.834	16.268	34.547	12.84	16.077	32.82	0	30.691	34.134	0	38.056	60.897	21.347	21.576	23.026	20.419	24.269
211586	Tfdp2	35.141	36.242	14.617	44.407	36.394	33.976	48.929	118.125	29.988	55.606	96.831	87.759	108.473	83.144	44.712	46.194	53.299	40.344	27.674	45.045	19.567	28.75	45.561	23.95	17.977	0	0	13.263	0	0	35.621	39.537	0	0	0	0	2.502	0	0	23.323	8.69	0	0	0	0
212391	Lcor	0	0	0	0	2.057	5.897	3.516	2.055	2.482	1.243	0	2.562	0	0	2.071	0	0	5.779	8.656	13.974	8.187	0	0	0	0	0	3.533	2.901	7.32	0	9.976	23.387	0	0	0	0	0	0	0	0	0	0	0	0	0
213054	Gabpb2	86.423	198.697	152.69	151.12	230.14	218.365	220.856	210.865	365.813	177.691	229.281	213.33	189.917	459.915	441.373	180.672	210.814	307.41	98.712	476.699	290.685	111.876	314.368	313.286	398.938	206.234	229.821	211.272	211.883	285.062	478.111	194.602	115.346	257.819	264.332	241.577	183.864	184.428	137.73	149.413	178.528	153.019	140.389	169.729	53.801
214742	Rcor3	0	0	0	0	0	27.521	0	0	0	0	0	0	0	14.094	13.047	0	13.186	0	0	0	0	0	13.889	1.526	22.18	22.019	14.826	36.546	36.6	39.11	27.471	25.669	36.548	69.173	60.336	71.096	57.966	49.519	51.691	58.61	34.333	46.753	23.765	35.712	0
214812	Zfp609	1.881	0	1.382	1.068	0	0	0	0	0	0	0	0	0	0	0	0	0	0	0	0	0	0	0	0	0	0	0	0	0	0	0	1.164	0	0	0	0	0	0	0	0	0	0	0	0	0
217864	Rcor1	87.833	203.294	171.719	40.969	136.702	170.455	70.056	24.089	66.41	24.109	4.33	5.364	21.779	65.636	60.583	32.811	70.874	72.651	16.763	37.461	48.559	31.151	58.608	25.58	70.547	62.369	71.247	129.945	140.96	150.738	150.347	669.395	124.13	328.312	255.194	313.398	326.252	278.403	292.358	309.227	232.62	276.112	192.585	249.942	170.594
218772	Rarb	12.339	13.146	12.069	5.737	6.88	8.749	1.999	2.456	0	0	0	0	3.607	0	0	0	0	0	0	0	0	0.959	0	0	0	0	0	0	0	0	3.601	9.553	5.253	16.179	17.418	16.487	15.707	17.978	15.18	8.792	4.658	7.729	0	0	0
218973	Wdhd1	0	0	0.78	1.004	0	0	1.787	0	0	0	0	0	0	0	0	0	0	0	0	0	0	0	0	0	0	0	0	0	0	0	0	0	0	0	0	0	0	0	0	0	0	0	0	0	0
219150	Hmbox1	12.259	33.255	31.971	3.468	7.86	10.72	0	0	0	0	0	0	0	0	0	0	0	0	0	0	0	0	0	0	12.539	12.257	10.128	23.599	32.698	19.559	15.186	20.464	0	51.417	49.765	44.756	58.204	44.72	50.148	46.233	22.036	20.522	0	0	0
223922	Atf7	24.097	57.459	27.009	5.63	14.65	14.148	16.098	23.425	14.369	10.113	16.869	0	0	11.743	7.668	17.213	20.331	18.733	7.236	7.898	6.91	5.612	0	4.507	0	0	0	0	0	7.125	6.357	0	0	0	0	0	11.6	10.231	9.941	107.545	14.444	10.604	0	0	0
224481	Tfb1m	0	0	0	0	0	0	0	0	0	0	0	5.123	0	0	0	0	0	0	4.508	4.777	5.123	0	4.449	0	0	0	0	0	0	0	5.811	29.089	0	8.712	10.726	10.943	8.543	7.709	5.901	0	0	0	0	0	0
225631	Onecut2	10.999	13.351	13.276	0	0	0	3.767	9.802	0	1.931	15.649	18.326	17.199	0	0	16.923	0	0	0	43.081	36.885	0	31.574	0	0	0	22.04	0	0	0	69.58	56.53	76.279	32.67	44.802	52.712	99.919	113.056	112.588	255.807	0	101.457	0	107.758	102.066
226442	Zfp281	20.416	1.441	0	0	0	3.467	0	0	0	0	0	0	0	0	0	0	0	0	0	0	0	0	0	0	0	0	0	0	0.685	0	3.177	27.722	11.178	4.246	9.384	13.228	12.559	8.181	10.248	40.104	15.952	7.003	10.063	13.627	14.648
226641	Atf6	0	0	0	1.948	0	0	1.23	1.375	0	0	1.685	0	0	0	0	0	0	0	0	0	0	0	0	0	0	0	0	0	0	0	0	0	0	0	0	0	0	0	0	0	0	0	0	0	0
226747	Ahctf1	362.806	324.719	431.98	125.129	85.274	87.844	53.726	43.058	24.187	12.256	9.834	8.565	9.949	6.236	7.154	6.169	7.582	9.603	9.444	8.678	8.697	11.174	9.833	11.536	193.883	36.128	33.751	54.674	52.337	48.175	39.323	83.067	96.19	189.459	199.097	209.852	255.468	265.419	253.546	338.783	101.975	97.113	83.623	103.353	81.088
228839	Tgif2	19.743	14.103	9.16	13.065	8.232	5.187	13.317	10.588	0	0	0	0	13.109	0	0	0	21.809	0	0	23.446	0	0	24.872	23.049	0	0	0	0	0	0	0	19.993	0	0	0	0	0	0	0	0	0	0	0	0	0
228911	Tshz2	0.327	0	2.592	0	0	0	0	0	0	0	0	0	0	0	0	0	0	0	0	0	0	0	0	0	0	0	0	0	0	0	0	0	0	0	0	0	0	0	0	0	0	0	0	0	0
229004	Gmeb2	0	0	5.703	4.295	0	8.75	0	0	0	0	0	0	0	0	0	0	0	0	0	0	0	0	0	0	0	0	0	0	0	0	0	0	0	0	0	0	0	0	0	3.886	0	0	0	0	0
229055	Zbtb10	6.569	6.535	131.514	1.132	0	0	0	0	0	0	0	0	0	0	0	0	0	0	0	0	0	0	0	0	0	0	0	0	0	0	0	0	0	0	0	0	0	0	0	0	0	0	0	0	0
229542	Gatad2b	9.198	26.743	22.146	2.504	6.098	6.936	2.187	0	0	0	0	0	0	0	1.098	0	1.611	0	0	1.864	0	0	0	0	0	0	0	0	0	6.99	0	7.863	11.869	8.546	8.043	14.655	6.871	10.615	19.991	11.53	4.374	3.798	0	0	0
229615	Pias3	0	0	0	0	0	0	0	0	0	0	0	0	0	0	0	0	0	0	0	0	0	0	0	0	0	0	0	0	0	0	0	1.864	0	0	0	0	0	0	0	0	0	0	0	0	0
229663	Csde1	0	0	0	0	0	0	3.948	0	4.45	0	0	0	0	0	0	0	0	0	0	0	0	0	0	0	0	0	0	0	0	0	0	0	0	0	0	0	0	0.869	0	0	7.813	2.587	0	0	2.983
230162	Zfp189	0.359	0	0	0	0	0	0	0	0	0	0	0	0	0.562	0	0	0	0	0	0	0	0	0	0	0	0	0	0	0	0	0	0	0	0	0	0	0	0	0	0	0	0	0	0	0
230700	Foxj3	0	6.148	1.984	0	32.372	25.778	17.291	34.278	30.659	0	39.078	21.345	49.358	55.659	65.853	0	48.282	49.926	15.611	27.928	48.286	0	43.453	19.61	7.109	10.191	6.549	16.8	21.865	21.217	34.485	0	4.864	7.893	0	7.367	6.066	7.061	10.304	0	12.757	24.694	15.389	36.168	0
230761	Zfp362	3.353	9.129	12.423	0	3.248	0	0	0	0	0	0	0	0	0	3.537	0	0	2.918	0	0	0	0	0	0	0	0	0	0	0	0	2.751	9.525	0	13.004	0	14.626	1.826	0	0	12.603	0	0	0	0	0
231051	Kmt2c	0.14	1.375	0.936	0	0	0	0	0	0	0	0	0	0	0	0	0	0	0	0	0	0	0	0	0	0	0	0	0	0	0	0	0	0	0	0	0	0.735	0	0.303	0	0	0	0	0	0
231151	Tada2b	0	2.678	1.827	0	2.087	2.392	1.233	0	0	0	0	0	0	0	0	0	0	0	0	0	0	0	0	0	1.233	0	0	0	0	0	0	2.332	1.433	2.915	0	0	1.536	6.137	6.787	0	0	7.456	5.58	0	0
232337	Zfp637	0	0	0	1.693	0	0	0	0	0	0	0	0	0	0	0	0	0	0	0	0	0	0	0	0	0	0	0	0	0	0	0	0	0	0	7.782	0	0	0	0	0	1.18	0	0	0	0
232879	Zbtb45	0	0	0	0	0	0	0	0	0	0	0	0	0	0	0	0	0	0	0	0	0	0	0	0	0	0	0	0	0	0	0	0	0	37.837	54.316	30.487	71.313	55.828	66.42	0	156.75	107.176	0	0	0
233410	Zfp592	1.698	0	0	0.255	0	0	0.805	0	0	0	0	0	0	0	0	0	0	0	0	0	0	0	0	0	0	0	0	0	0	0	0	5.707	0	4.193	5.423	0	6.81	5.49	5.541	5.128	12.597	5.98	4.295	0	4.274
233887	Zfp553	2.83	0	0	0	0	0	0	0	0	0	0	0	0	0	0	0	0	0	0	0	0	0	0	0	0	0	0	0	0	0	0	0	0	0	0	0	0	0	0	0	0	0	0	0	0
235134	Nfrkb	28.732	52.776	49.446	18.004	73.045	59.318	17.808	19.97	12.731	0.988	0	0	1.586	1.415	1.035	0	4.942	13.243	0	24.366	0.748	0	5.114	31.081	15.367	21.754	14.206	23.461	31.155	26.602	14.456	34.057	98.024	52.91	77.823	50.187	83.242	86.274	107.443	142.454	109.124	95.422	63.826	77.502	85.433
237339	L3mbtl3	40.875	44.192	34.412	5.001	3.967	3.087	0	0	0	0	0	0	0	0	0	0	0	0	0	0	0	0	0	0	0	0	0	0	0	0	0	0	0	0	0	0	0	0	3.727	0	0	0	0	0	0
238247	Arid4a	17.128	4.56	4.204	4.904	0	0	0	0	0	0	0	0	0	0	0	0	0	0	0	0	0	0	0	0	0	0	0	0	0	0	0	0	0	0	0	0	0	0	0	0	0	0	0	0	0
238317	Elmsan1	9.585	19.019	12.56	4.086	5.232	5.397	1.755	0	0	0	0	0.851	0	0	0	0	0	0	0	0	0	0	0	0	0	0	0	0	0	0	0	3.985	0	5.906	7.508	6.996	8.954	6.74	7.238	3.707	0	0	0	0	0
238673	Zfp367	0	0	0	0	0	0	0	0	0	2.973	0	0	0	0	0	0	0	0	0	0	0	0	0	0	0	0	0	0	0	0	0	0	0	0	0	0	0	0	0	0	0	0	0	0	0
239102	Zfhx2	0	0	0	0	0	0	0	0.362	0	0	0	0	0	0	0	0	0.257	0	0	0	0.384	0	0	0	0	0	0	0	0	0	0	0	0	0	0	0	0	0	0	0	0	0	0	0	0
239985	Arid1b	0	0	0.7	0	0.791	0	0	0	0	0	0	0	0	0	0	0	0	0	0	0	0	0	0	0	2.537	0	2.089	2.793	2.552	4.433	1.587	2.605	6.879	8.815	3.072	6.975	7.758	4.884	4.061	10.314	4.657	4.142	2.211	2.269	2.563
240869	Zbtb37	0	0	0	0	0	0	0	0	0	0	0	0	0	0	0	0	0	0	0	0	0	0	0	0	0	0	0	0	0	0	0	3.64	0	0	0	0	0	0	0	0	0	0	0	0	0
241311	Zbtb34	0	1.708	0	0	0.866	1.111	0	0	0	0	0	0	0	0	0	0	0	0	0	0	0	0	0	0	0	0	0	0	0	0	0	0	0	0	0	0	0	0	0	0	0	0	0	0	0
242509	Bnc2	0.901	0	0	0	0	0	0	0	0	0	0	0	0	0	0	0	0	0	0	0	0	0	0	0	0	0	0	0	0	0	0	0	0	0	0	0	0	0	0	0	0	0	0	0	0
242705	E2f2	54.752	75.655	70.635	80.914	124.563	146.579	124.328	164.41	128.466	180.25	236.736	185.028	143.333	221.019	224.873	272.977	175.621	175.46	183.822	101.097	86.573	99.179	78.554	66.272	77.345	47.726	66.854	53.183	46.336	46.728	57.461	49.741	0	18.503	0	0	7.882	15.431	12.598	0	0	0	0	0	0
243905	Zfp568	0	0	0	0	0	0	0	0	110.957	0	0	0	0	0.575	0	0	0	0	0	0	0	0	0	0.894	0	0	0	0	0	0	0	0	0	0	0	0	0	0	0	0	0	0	0	0	0
244216	Zfp771	4.108	0	0	0	0	0	10.398	4.071	0	0	6.103	0	12.992	0	0	0	0	0	0	0	0	0	0	0	0	0	0	0	0	0	0	5.915	0	0	0	0	0	0	0	0	0	0	0	0	0
245007	Zbtb38	0	0	0	0	0	0	0	0	0	0	0	0	0	0	0	0	0	0	0	0	0	0	0	0	0	0	0	0	0	0	0	6.371	0	0	0	0	0	0	0	0	0	0	0	0	0
245595	Zfp711	0	0	0	0	0	0	0	0	0	0	0	0	0	0	0	0	0	0	0	0	0	0	0	0	0	0	0	0	0	0	0	0	0	0	0	0	0	0	11.25	0	0	0	0	0	0
246086	Onecut3	9.268	0	14.586	0	0	0	0	0	0	0	0	0	0	0	0	0	0	0	0	0	0	0	0	0	0	0	0	0	0	0	0	0	0	0	0	0	0	0	0	0	0	0	0	0	0
252838	Tox	0	0	0	0	0	0	0	0	0	0	0	0	0	0	0	0	0	0	0	0	0	0	21.579	17.826	0	0	0	0	0	0	0	0	0	0	0	0	0	0	0	0	0	0	0	0	0
268469	Zfp652	0	1.376	0	0	0	7.572	0.759	0	0	0	0	0.808	0	15.418	12.911	4.252	12.174	13.784	5.168	0	0	0	0	5.553	0	0	0	0	0	0	2.426	10.915	8.903	16.366	16.749	7.353	12.436	7.579	8.751	8.645	13.775	19.436	0	0	0
268741	Tox4	2.085	26.24	31.713	2.601	26.498	28.538	0	11.657	0	3.269	0	0	0	0	8.277	0	0	9.604	0	0	0	0	0	0	12.849	13.42	14.001	15.927	0	17.16	2.066	0	19.823	0	27.452	24.73	29.408	53.05	29.229	0	0	0	33.791	0	29.221
269639	Zfp512	98.953	41.793	39.717	57.578	29.361	32.139	46.392	29.293	22.599	29.076	6.421	4.392	9.893	19.457	27.932	58.501	8.599	12.145	45.77	19.566	21.253	24.688	109.813	99.536	24.754	17.752	20.021	12.093	26.63	26.208	18.461	60.654	68.197	82.016	113.285	98.009	103.875	112.613	80.961	206.376	64.504	53.038	25.411	36.721	27.292
269800	Zfp384	2.93	9.825	9.03	0	4.196	4.241	0	0	1.286	0	0	0	0	0	0	0	0	1.91	0	0	0	0	0	0	0	0	7.205	13.836	13.317	12.036	21.306	660.427	11.126	30.264	21.016	33.522	13.856	20.251	14.595	27.718	19.979	18.919	8.583	0	15.159
270210	Zfp651	0	0	0	0	0	0	0	0	0	0	0	0	0	0	0	0	0	0	0	0	0	0	0	0	0	0	0	0	0	0	0	1.873	0	13.558	0	0	0	0	0	0	0	0	0	0	0
272382	Spib	0	0	0	0	0	0	0	0	0	0	0	0	0	0	0	0	0	0	0	0	0	0	28.835	16.964	0	0	0	0	0	0	0	0	0	0	0	0	0	0	0	0	0	0	0	0	0
319748	Zfp865	1.283	0	0	0	0	0	0	0	0	0	0	0	0	0	0	0	0	0	0	0	0	0	0	0	0	0	0	0	0	0	0	0	0	0	0	0	0	0	0	0	0	0	0	0	0
319758	Rfx7	1.507	1.066	1.712	2.271	1.978	1.33	2.204	1.47	0	0	0.743	1.03	0	0	0	0	0.221	0	0	0	0	0	0	0	0	0	0	0	0	0	0	1.64	0	0	0	0	0	0	0	0	0	0	0	0	0
320394	Cenpt	1.421	0	0	1.269	0	0	5.506	1.874	0	0	4.406	5.502	1.737	0	0	0	0	0	0	0	0	0	0	0	0	0	0	0	0	0	0	0	0	0	0	0	0	0	0	0	0	0	0	0	0
320683	Zfp629	0	0	0	0	0	0	0	0	0	1.293	0	0	0	0.769	0	2.407	0	1.761	0	0	1.111	0.771	3.972	3.793	0	0	0	0	0	0	0.489	1.87	0	0	0	0	0	0	0	0	0	0	0	0	0
320799	Zhx3	0	0	0	0	0	0	0	0	0	0	0	0	0	0	0	0	0	0	0	0	0	0	0	0	0	0	0	0	0	0	0	0	44.382	14.301	20.262	13.02	41.867	15.965	25.089	100.665	37.532	33.734	0	24.519	19.092
329002	Zfp236	4.834	1.496	2.06	0.863	1.704	1.698	0.417	1.969	0	0	0	0	0	0.266	0	1.834	0.54	0.909	0.32	0	0	0.51	0	0.584	0	0.209	0.339	0	1.324	0	0	2.036	0	1.187	1.782	0.64	0.822	0.948	1.413	0.109	0.679	0	0	0	0
380669	Lin28b	0	0	0	0	0	0	0	0	3.566	0	0	0	0	0	0	0	6.063	0	0	0	0	0	0	0	0	0	0	0	0	0	0	0	0	0	0	0	0	0	0	0	0	0	0	0	0
380912	Zfp395	1.255	6.991	8.75	0	0	0	0	0	0	0	0	0	0	0	0	11.524	0	0	0	0	0	0	0	0	0	0	0	0	0	0	0	0	0	0	0	0	0	0	0	0	0	0	0	0	0
382066	Prdm10	19.063	13.509	15.318	13.327	13.785	14.707	14.403	17.73	14.321	7.223	10.77	17.934	22.195	15.624	11.104	15.082	7.829	9.094	0	7.102	3.649	5.546	4.825	6.051	2.232	1.34	4.24	0	0	0	0	9.934	0	3.512	6.041	5.582	8.257	6.953	8.125	0	4.956	0	0	5.829	0
387609	Zhx2	0	0	0	0	0	0	0	0	0	0	0	0	0	0	0	0	0	0	0	0	0	0	0	0	0	0	0	0	0	0	0	0.676	139.76	17.617	19.695	26.565	83.077	93.98	96.082	117.223	183.531	146.248	99.847	95.683	105.354
407823	Baz2b	41.012	42.128	36.906	27.615	21.39	16.852	22.961	14.547	9.991	7.753	8.659	11.522	7.118	15.374	18.409	11.175	7.132	8.373	13.794	19.338	22.537	27.903	26.029	18.718	26.095	24.133	26.186	15.167	11.882	25.245	24.744	17.366	0	5.71	11.581	10.506	16.703	17.211	19.377	11.162	24.578	3.407	3.571	4.304	2.771
432731	Zscan26	6.936	0	0	1.367	0	0	0	0	0	0	0	0	0	0	0	0	0	0	0	0	0	0	0	0	0	0	0	0	4.677	0	0	0	0	5.644	0	0	0	0	0	0	0	0	0	0	0
627049	Zfp800	6.699	11.111	8.332	33.416	28.373	35.837	24.669	34.082	31.08	7.268	0	3.598	20.451	21.889	24.801	12.807	5.57	12.095	0	21.451	14.8	15.347	16.626	5.104	24.421	20.335	30.697	26.58	34.801	9.2	13.389	43.176	22.203	6.956	33.687	32.037	21.923	26.543	28.591	0	30.44	13.16	30.228	27.743	31.597

## Sheet: Sheet3
Gene.ID	GeneSymbol	E12.5 R1	E12.5 R2	E12.5 R3	E13.5 R1	E13.5 R2	E13.5 R3	E14.5 R1	E14.5 R2	E14.5 R3	E15.5 R1	E15.5 R2	E15.5 R3	E16.5 R1	E16.5 R2	E16.5 R3	E17.5 R1	E17.5 R2	E17.5 R3	E18.5 R1	E18.5 R2	E18.5 R3	D1 R1	D1 R2	D1 R3	D3 R1	D3 R2	D3 R3	D5 R1	D5 R2	D5 R3	W1 R1	W1 R2	W1 R3	W2 R1	W2 R2	W2 R3	W3 R1	W3 R2	W3 R3	W6 R1	W6 R2	W6 R3	W8 R1	W8 R2	W8 R3
11538	Adnp	1.054	1.743	1.797	0.862	2.318	1.355	0	0	0	0	0	0	0	0	0	0	0	0	0	0	0	0	0	0	0	0	0	0	1.688	1.571	0	0	0	0	0	0	0	0	0	0	0	0	0	0	0
11819	Nr2f2	404.83	327.956	452.521	166.853	177.932	193.482	131.969	202.264	77.246	42.133	72.855	51.813	119.852	87.129	62.29	89.726	92.52	108.249	52.924	25.529	24.766	76.852	77.355	45.941	76.525	65.741	58.251	78.691	81.901	84.995	229.591	193.806	214.629	254.839	253.876	244.789	337.696	325.709	378.884	395.632	208.604	193.271	155.275	194.172	171.941
11863	Arnt	12.533	14.639	21.205	13.128	23.897	20.54	15.703	64.9	22.94	26.418	78.025	74.537	107.464	58.831	49.933	73.068	57.972	58.306	46.284	36.097	24.239	0	0	0	0	5.597	9.946	15.636	9.484	18.079	10.831	12.191	0	0	0	0	0	3.519	1.958	0	0	0	0	0	0
11865	Arntl	1.433	6.259	9.934	8.711	27.359	12.164	13.18	11.019	29.714	6.411	9.288	12.59	21.069	26.623	14.26	33.207	362.368	454.65	50.645	339.872	128.279	88.306	324.803	262.138	24.599	8.299	8.396	29.218	20.28	29.824	69.91	55.552	1448.47	132.838	55.667	106.634	191.324	174.694	182.477	420.115	276.997	640.465	1541.02	303.948	396.854
11906	Zfhx3	7.949	3.228	2.671	3.396	0.514	8.4	0.318	2.451	0.342	0.677	1.212	1.255	3.94	0.972	0.602	0	0.786	0.652	0.913	0.544	0.298	1.614	0.33	0.264	0.6	0.274	0.389	0.28	0.464	1.042	5.502	4.026	2.112	2.495	1.276	3.044	4.064	1.829	2.095	9.526	1.143	0.72	12.361	0.67	1.205
11908	Atf1	0	0	0	0	0	0	0	0	0	0	0	0	0	0	0	0	0	0	0	0	0	0	0	0	0	0	0	0	0	0	0	0	0	0	0	0	0	0	0	30.396	70.055	0	0	0	0
12053	Bcl6	0	0	0	0	0	0	0	0	0	0	0	0	0	0	0	0	0	0	0	0	0	0	0	0	0	0	0	0	0	0	0	0	0	0	0	0	0	0	0	33.783	16.261	34.268	0	14.072	0.598
12387	Ctnnb1	0	0	0	0	0	0	0	0	0	0	0	0	0	0	0	13.319	0	4.038	7.568	6.433	1.163	0	2.695	1.64	4.946	6.911	2.031	26.506	9.747	27.65	9.255	15.36	49.351	69.22	49.869	43.29	48.805	48.315	40.414	81.785	41.811	40.854	49.654	69.579	42.499
12393	Runx2	0	0	0	0	0	0	0	0	0	0	0	0	0	0	0	0	0	0	0	3.318	1.818	1.625	1.719	0	0	0	0	0	0	0	0	0	0	0	0	0	0	0	0	0	0	0	0	0	0
12394	Runx1	90.628	106.849	89.409	39.501	44.789	51.72	35.867	51.202	49.263	17.886	26.218	25.684	27.988	31.874	34.486	29.354	27.691	38.254	29.579	62.157	45.984	28.096	42.421	29.986	38.021	37.832	28.757	28.067	17.011	25.363	40.341	110.336	0	0	0	0	0	0	0	0	0	0	0	0	0
12399	Runx3	0	0	0	9.359	10.68	11.323	17.145	26.544	11.354	0	0	0	13.878	11.309	10.779	0	0	0	7.223	13.193	14.575	10.749	17.135	14.089	15.706	0	10.465	0	0	0	19.183	1.768	0	0	0	0	0	0	0	0	0	0	0	0	0
12400	Cbfb	0	0	0	63.782	0	47.929	72.734	178.051	0	64.132	151.909	90.382	99.607	73.532	89.065	94.009	91.293	72.62	120.989	98.077	117.355	79.357	69.502	48.301	49.777	42.226	0	0	0	0	83.298	101.719	0	0	0	0	0	0	0	0	0	0	0	0	0
12606	Cebpa	167.855	50.014	46.658	0	0	0	87.676	112.255	26.19	0	93.84	46.681	0	0	0	134.884	62.135	82.778	279.536	199.373	75.474	339.411	38.192	31.643	158.54	133.261	158.228	227.307	244.338	219.521	163.257	276.284	0	195.552	355.226	336.106	477.289	363.569	278.698	533.356	196.154	0	141.2	149.764	192.6
12607	Cebpz	3.2	5.828	4.921	0	6.121	3.427	4.038	16.374	4.576	0	2.204	2.742	9.753	6.276	1.699	6.539	5.145	3.648	8.082	4.188	5.88	1.481	4.87	5.314	2.536	0.861	2.625	1.123	1.744	0	9.373	45.453	0	0	0	0	1.381	0	2.891	6.637	1.537	1.719	2.19	1.57	1.405
12608	Cebpb	0	0	0	0	0	0	0	0	0	0	0	0	0	0	0	0	0	0	0	0	0	0	0	0	0	0	0	0	0	0	0	0	0	139.535	0	103.321	190.25	194.041	160.508	449.083	110.411	102.753	139.94	152.669	0
12611	Cebpg	0	0	0	0	0	0	0	0	0	0	0	0	0	0	0	0	0	0	0	0	0	0	0	0	32.823	65.57	0	0	0	0	0	0	0	0	0	0	0	0	0	0	0	0	0	0	0
12753	Clock	1.335	1.956	1.597	5.828	2.618	4.699	7.024	13.758	4.831	5.397	11.403	11.67	28.881	15.737	14.986	23.298	15.641	17.405	40.313	18.511	15.015	57.88	22.754	23.393	18.626	11.185	16.36	29.382	26.537	31.27	47.682	753.266	193.384	53.364	64.599	48.334	108.381	113.212	111.004	293.906	143.294	148.991	174.684	174.735	178.746
12912	Creb1	861.358	264.952	226.679	258.228	60.822	0	110.177	62.813	0	0	0	0	0	0	0	0	0	0	0	0	0	0	0	0	0	51.143	55.332	69.89	82.802	77.946	78.992	0	153.861	109.303	119.761	0	0	131.349	187.207	206.596	94.896	78.822	98.644	163.842	151.799
13018	Ctcf	211.646	157.242	176.261	155.236	189.257	174.172	128.596	101.929	177.413	72.019	42.291	21.276	97.207	134.668	161.05	120.798	74.74	91.654	101.014	56.828	21.796	58.832	52.92	67.772	69.43	102.977	80.795	122.805	121.677	154.277	0	53.444	101.408	201.508	89.933	293.949	170.182	263.095	259.616	110.21	152.337	150.791	231.218	336.522	266.362
13047	Cux1	13.516	53.882	41.807	0	1.595	1.416	0	0	0	0	0	0	0	0	0	0	0	0	0	0	0	0	0	0	0	0	0	0	0	0	0	0	0	1.098	0.656	1.646	0	0	0	0	0	0	0	0	0
13418	Dnajc1	0	0	0	0	0	0	0	0	0	0	0	0	0	0	0	0	0	0	0	0	0	0	0	0	0	0	0	0	0	0	0	0	0	0	0	0	0	0	0	0	0	0	29.93	31.062	0
13496	Arid3a	6.083	21.685	21.538	6.365	7.209	7.078	4.128	6.525	4.278	4.064	8.378	10.546	14.674	0	7.102	5.772	4.59	10.08	6.377	0	7.2	3.896	4.895	5.705	2.308	2.985	1.966	0	4.681	5.478	0	0	0	0	0	0	0	0	0	0	0	0	0	0	0
13557	E2f3	61.437	76.904	71.117	41.396	80.937	71.062	51.932	85.035	47.833	49.516	86.493	55.657	46.293	70.163	52.869	92.289	58.583	60.663	80.327	69.775	62.78	44.322	49.906	40.164	43.452	19.427	43.422	95.545	112.223	92.073	104.339	99.84	31.127	46.81	78.641	42.338	39.747	43.139	34.469	58.817	19.719	23.132	15.195	16.556	18.828
13559	E2f5	25.851	22.845	0	28.376	0	74.461	31.408	24.878	0	0	0	0	0	0	0	0	0	0	0	0	0	0	0	0	0	0	0	0	0	0	0	0	0	0	0	0	0	0	0	0	0	0	0	0	0
13560	E4f1	0	0	0	3.629	15.568	17.004	0	0	0	0	0	0	0	0	0	0	0	0	0	0	0	0	0	0	0	0	0	0	0	0	0	0	0	0	0	0	0	0	0	0	0	0	0	0	0
13653	Egr1	0	0	0	0	0	0	0	0	0	0	0	0	0	0	0	0	0	0	0	0	0	0	0	0	8.638	7.14	8.959	9.847	11.992	12.456	11.483	0	4.081	0	1.296	9.664	0	0	0	0	0	0	0	0	0
13709	Elf1	110.156	103.85	90.105	70.26	29.858	27.419	101.322	126.496	51.023	41.184	66.37	54.968	74.14	34.185	33.425	56.796	20.272	29.383	79.944	35.53	32.75	136.319	23.194	35.084	0	0	0	0	0	0	17.466	69.635	0	0	0	0	14.238	18.955	22.016	17.345	0	11.634	12.657	12.639	0
13713	Elk3	23.169	0	23.342	0	0	0	0	0	0	0	0	0	0	0	0	0	0	0	0	0	0	0	0	0	14.135	16.34	15.153	20.332	24.029	24.312	41.243	24.996	0	22.317	28.473	0	21.465	17.903	24.856	0	0	0	10.062	11.627	4.987
13714	Elk4	0	12.746	16.591	0	0	0	0	0	0	0	0	0	0	8.238	5.403	0	11.319	8.052	0	14.413	35.332	0	0	0	25.405	26.002	21.74	0	30.793	34.878	55.503	55.846	35.851	68.379	67.744	36.674	83.712	32.948	49.356	56.405	39.047	34.171	63.068	59.067	62.335
13864	Nr2f6	21.005	46.303	43.167	0	28.231	29.995	10.676	30.872	19	0	12.604	7.469	28.986	19.878	11.853	45.17	28.866	32.028	0	0	0	0	9.862	8.119	16.104	0	13.36	0	0	0	115.373	80.18	193.096	116.606	75.568	94.512	209.314	182.42	239.356	346.89	234.944	203.178	195.807	245.535	235.272
13865	Nr2f1	92.821	155.578	139.325	48.218	70.073	75.196	40.849	93.328	36.749	14.64	0	21.81	51.714	28.669	24.715	0	35.615	38.126	0	0	0	28.362	20.689	17.357	0	0	0	0	0	0	55.763	104.353	0	0	0	0	153.876	151.959	167.668	0	0	0	0	0	0
13875	Erf	5.227	7.846	8.488	0	0	0	0	0	0	0	0	0	0	0	0	0	0	0	0	0	0	0	0	0	1.522	9.555	8.178	0	0	0	0	0	0	6.803	9.908	0	0	0	0	49.455	9.384	11.532	0	0	0
13876	Erg	50.08	63.405	71.982	49.202	36.147	60.869	26.244	16.445	63.774	31.774	47.204	89.009	47.988	105.679	53.522	65.808	62.336	102.888	108.503	97.852	35.081	42.007	162.712	100.574	121.654	84.45	73.855	98.824	111.956	111.789	156.647	205.382	25.553	92.766	66.206	116.665	39.779	78.915	53.457	53.579	48.799	46.141	27.364	74.76	20.651
14011	Etv6	105.808	85.333	54.745	4.154	1.874	0	0	0	0	0	0	0	0	0	0	0	0	0	0	0	0	0	0	0	0	0	0	0	0	0	0	0	0	0	0	0	0	0	0	0	0	0	0	0	0
14025	Bcl11a	10.052	12.193	14.741	9.362	7.728	9.134	6.043	14.977	6.064	0	0	0	0	0	0	0	0	0	0	0	0	0	0	0	0	0	0	0	0	0	0	0	0	0	0	0	0	0	0	0	0	0	0	0	0
14247	Fli1	119.255	100.995	102.033	70.006	54.933	84.473	51.207	194.013	37.944	44.577	63.975	60.379	61.318	76.265	66.142	84.143	62.602	66.119	46.083	127.595	59.979	83.086	99.189	84.294	63.49	58.309	91.881	119.322	84.231	81.598	84.528	105.966	0	0	13.165	34.36	0	0	0	0	0	0	0	0	0
14390	Gabpa	352.361	559.685	499.05	402.32	427.337	448.561	351.966	436.732	235.412	200.351	71.425	184.937	253.677	318.614	286.195	243.853	222.005	246.784	160.248	234.699	214.985	149.284	290.753	268.238	120.016	123.196	127.963	198.369	148.154	177.047	503.381	294.453	163.56	178.806	291.27	288.719	284.872	262.565	287.773	471.491	175.119	154.904	179.832	164.317	151.145
14391	Gabpb1	89.896	204.414	186.282	109.996	177.733	193.146	119.864	119.105	174.506	113.889	122.859	112.21	111.714	457.757	278.583	103.602	309.812	370.809	68.007	615.409	514.812	112.61	548.727	336.747	208.781	263.995	234.995	194.59	293.017	186.494	334.702	99.032	110.978	161.649	0	85.035	182.153	81.108	194.158	354.288	154.305	151.386	65.355	124.744	46.596
14463	Gata4	87.841	176.138	150.859	33.608	55.706	64.245	0	0	0	0	0	0	0	0	0	0	0	0	0	0	0	0	0	0	78.75	67.898	63.118	105.183	116.621	112.243	148.102	147.475	164.086	167.189	217.016	179.403	193.449	112.253	198.082	352.487	124.807	0	0	0	0
14465	Gata6	35.182	87.466	74.359	33.144	54.818	57.887	43.472	0	38.438	0	0	0	0	0	0	31.429	28.051	30.233	0	0	0	25.582	40.644	32.829	41.865	37.304	38.329	0	0	0	0	0	0	0	0	0	0	0	0	40.567	0	35.741	0	0	0
14582	Gfi1b	18.195	91.616	58.361	22.315	27.357	20.926	0	88.689	3.341	0	0	0	30.656	131.2	154.411	0	6.761	174.86	0	0	0	0	0	0	0	0	0	0	0	0	0	0	0	0	0	0	0	0	0	0	0	0	0	0	0
14815	Nr3c1	0	0	0	0	1.255	1.545	0.956	5.337	1.5	0	0	0	0	0	0	5.614	0	2.539	0	2.182	1.634	0.418	1.422	0	0	0	0	4.764	2.456	4.373	2.87	3.454	26.626	36.747	30.383	33.672	36.325	35.839	41.1	43.878	23.127	19.489	24.543	31.194	26.487
14886	Gtf2i	139.599	197.196	194.093	81.722	87.838	109.132	72.41	68.548	78.271	17.795	25.399	32.329	52.706	82.975	87.218	12.47	72.52	67.784	8.006	43.028	82.773	20.627	33.124	76.49	69.037	71.266	27.7	52.861	60.273	57.372	34.596	39.516	14.166	43.793	53.857	63.337	46.516	92.971	48.794	27.826	19.357	11.559	4.597	0	12.79
15111	Hand2	7.277	10.387	9.259	0	0	0	0	0	0	0	0	0	0	0	0	0	0	0	0	0	0	0	0	0	0	0	0	0	0	0	0	0	0	0	0	0	0	0	0	0	0	0	0	0	0
15205	Hes1	0	0	0	0	0	0	0	0	0	0	0	0	0	0	0	0	0	0	0	0	0	0	34.669	22.247	0	0	0	0	0	0	11.282	65.002	0	0	0	0	0	0	0	0	0	0	0	0	0
15227	Foxf1	0	0	0	4.233	0	7.859	0	0	0	0	14.659	11.777	16.695	11.15	9.509	36.909	0	16.661	0	0	0	0	0	0	23.466	26.377	21.222	0	31.889	28.249	0	24.879	5.948	0	0	0	0	0	0	0	0	0	0	0	0
15242	Hhex	0	0	0	0	0	0	0	0	0	0	0	0	0	0	0	0	0	0	0	0	0	0	0	0	0	0	0	0	0	0	42.047	0	264.806	127.923	0	139.835	156.938	54.291	157.93	0	212.584	228.724	270.79	320.243	353.04
15248	Hic1	0.908	1.348	0	0	0	0	0	0	0	0	0	0	0	0	0	0	0	0	0	0	0	0	0	0	0	0	0	0	0	0	0	0	0	15.015	22.358	17.998	8.283	9.997	7.32	0	0	0	0	0	0
15251	Hif1a	0	3.547	1.674	1.916	5.018	5.368	0	3.061	0.937	0	0	0	0	3.374	1.103	0	1.986	1.003	0	0	0	0	0	0	0	0	0	0	0	0	0	0	0	0	0	0	0	0	0	0	0	0	0	0	0
15353	Hmg20b	8.24	37.097	33.975	17.026	38.629	52.61	16.915	23.163	33.397	6.254	4.466	88.223	16.068	8.769	14.391	21.984	9.982	17.578	19.001	33.233	32.565	15.342	29.335	15.766	44.745	39.584	34.381	45.41	50.097	63.816	79.708	49.876	7.87	12.428	24.354	36.001	34.525	49.494	44.37	21.572	19.632	15.448	0	28.966	21.575
15354	Hmgb3	7431.66	12248.8	12975	11481.8	13824.6	10759.5	14773.9	12319.7	17963.9	13058.1	14700	14294.6	10955.7	12070.1	15406.3	11770.8	13477.6	15616	7434.35	8765.84	6925.74	5219.73	4603.36	7692.86	3968.95	5415.59	5181.46	2402.64	2397.43	2781.43	2506.35	3836.33	1460.44	1680.76	1837.42	2195.82	2046.58	2079.15	1770.23	1438.64	1242.36	1314.96	1156.89	1496.93	1411.9
15361	Hmga1	16728.4	18796	20799.7	19624.5	20083.4	0	15265.6	18620.5	11117.7	13889.7	15253.9	10997.3	0	0	0	0	0	0	0	0	0	0	0	0	0	0	0	0	0	0	0	0	0	0	0	0	0	0	0	0	0	0	9096.5	9190.31	13914.5
15364	Hmga2	18807.4	7825	8455.54	5665.05	1606.62	2467.45	4304.18	2474.65	911.204	1693.84	1683.28	1327.36	877.645	1078.32	805.121	2073.45	964.666	1185.13	5877.67	1674.74	1671.66	5171.1	3024.95	1162.61	913.914	1209.39	1152.22	1183.26	1160.15	1188.01	2340.27	1233.72	220.821	646.42	677.124	637.36	540.965	498.518	473.939	636.861	272.626	256.765	235.72	216.698	252.856
15375	Foxa1	0	0	0	0	0	0	0	0	0	0	9.567	13.387	0	0	0	0	0	0	7.355	0	6.864	0	0	0	0	0	0	0	0	0	0	0	0	0	0	0	0	0	0	37.09	56.64	34.484	0	89.621	109.651
15378	Hnf4a	351.088	296.498	256.267	491.878	193.102	305.546	275.952	355.699	292.374	142.509	300.041	192.325	653.243	428.846	373.239	246.658	337.812	460.983	183.745	315.507	316.899	308.901	329.81	278.33	379.76	249.904	234.626	198.34	402.757	243.02	1664.51	991.051	4292.56	1010.83	944.219	909.969	2797.79	2930.33	2809.74	3511.91	3286.94	3009.69	2372.23	2756.99	2030.18
15379	Onecut1	13.743	0	10.405	0	0	0	0	0	0	0	0	0	0	0	0	17.794	20.561	15.135	115.511	91.352	42.424	30.644	60.41	28.879	0	0	0	0	0	0	83.197	70.519	124.088	0	0	0	107.309	104.618	106.383	267.995	98.051	100.014	100.469	104.044	95.405
15402	Hoxa5	65.304	38.79	37.098	0	0	0	0	0	0	0	0	0	0	0	0	0	0	0	0	0	0	0	0	0	0	0	0	0	0	0	0	0	0	0	0	0	0	0	0	0	0	0	0	0	0
15412	Hoxb4	24.905	17.54	10.165	0	116.62	126.725	0	0	0	0	0	0	0	0	0	0	0	0	0	0	0	0	0	0	0	0	0	0	0	0	0	0	0	0	0	0	0	0	0	0	0	0	0	0	0
15499	Hsf1	0	0	0	0	1.419	28.735	0	0	0	0	0	0	0	0	0	0	0	0	0	0	0	0	0	0	0	0	0	0	0	0	0	0	0	0	0	0	0	0	0	13.62	0	3.613	0	11.46	13.729
16363	Irf2	561.594	308.799	324.026	107.822	188.622	164.691	174.294	191.573	279.654	71.075	179.234	117.184	157.775	239.483	216.423	118.996	178.984	239.051	211.956	150.574	106.299	125.781	107.136	77.212	87.486	48.286	60.886	104.361	69.836	172.575	218.931	50.329	64.476	117.585	0	150.501	0	136.15	190.121	317.909	117.343	99.118	227.601	220.698	156.941
16478	Jund	21.252	9.614	0	0	0	0	0	0	0	0	0	0	0	0	0	0	0	0	0	0	0	0	0	0	0	0	0	0	0	0	0	0	0	0	0	0	0	0	0	0	0	0	0	0	0
16549	Khsrp	0	0	0	0	26.889	23.141	0	24.261	10.197	0	0	0	6.432	2.585	4.952	8.448	35.992	33.616	0	0	0	5.093	2.733	1.631	6.141	5.667	3.727	9.408	10.311	9.747	9.874	35.521	38.834	42.788	35.949	30.523	27.727	27.455	49.86	58.35	76.96	64.829	42.36	43.054	43.571
16597	Klf12	4.758	31.96	26.887	0	0	0	0	0	0	0	0	0	0	0	0	0	0	0	0	0	0	0	0	0	0	0	0	0	0	0	0	3.14	49.101	71.011	72.933	73.956	61.741	64.88	58.118	17.873	20.315	0	32.706	20.771	31.345
16599	Klf3	6.441	37.911	33.305	0	29.796	91.383	27.981	91.748	69.134	0	0	0	0	0	0	64.21	26.319	24.41	38.46	25.453	0	0	0	0	49.202	0	59.378	0	0	0	0	0	0	0	0	0	80.905	75.349	93.304	0	27.934	13.253	36.112	23.834	78.345
16601	Klf9	0	0	0	0	0	0	0	0	0	0	0	0	0	0	0	0	0	0	0	0	0	0	0	0	0	0	0	0	0	0	0	0	0	0	0	0	11.269	19.018	0	0	0	0	0	0	0
16842	Lef1	0	0	0	0	0	0	0	0	0	0	0	0	0	0	0	20.661	0	10.232	20.52	75.487	59.926	6.988	79.512	71.293	0	0	0	0	0	0	0	0	0	0	0	0	0	0	0	0	0	0	0	0	0
16870	Lhx2	11.349	15.578	7.292	0	0	0	0	0	0	0	0	0	0	0	0	0	0	0	0	0	0	0	0	0	0	0	0	0	0	0	0	0	0	0	0	0	0	0	0	0	0	0	0	0	0
16969	Zbtb7a	8.924	16.125	9.579	12.61	35.023	54.031	55.318	37.582	0	22.847	0	15.448	0	0	0	0	0	0	0	0	0	0	0	0	0	0	0	0	0	0	0	0	0	0	0	0	0	0	0	0	4.968	6.756	0	0	0
16978	Lrrfip1	0	0	0	0	0	0	0	0	0	0	0	0	0	1.897	0.354	1.188	1.839	2.19	1.787	2.472	1.789	0	0	0	1.699	0	2.044	0	2.383	2.576	0	3.126	7.832	3.56	4.53	4.01	6.203	5.37	6.78	0	6.788	6.11	5.385	7.154	7.662
17002	Ltf	0	0	0	0	0	0	0	0	0	2.154	4.464	3.152	2.403	14.536	76.985	20.7	86.192	83.517	54.861	237.304	232.464	2.965	54.34	84.592	18.932	15.294	12.777	96.803	12.964	25.867	33.113	3.844	0	0	0	0	0	0	0	0	0	0	0	0	0
17089	Lyar	4.518	52.338	49.547	10.391	46.572	42.681	7.821	25.051	73.207	60.238	22.031	34.259	16.013	241.058	135.197	54.756	35.99	120.222	55.323	223.292	216.339	0	195.761	171.953	147.861	141.271	148.68	240.45	131.711	157.478	0	11.656	97.196	138.704	47.578	124.561	42.655	58.218	67.559	6.043	129.916	13.162	97.03	172.76	175.352
17095	Lyl1	17.399	15.969	0	12.665	0	89.978	0	0	0	14.828	0	3.672	8.457	13.076	11.145	0	0	0	0	0	0	0	0	0	0	0	0	0	0	0	0	0	0	0	0	0	0	0	0	0	0	0	0	0	0
17119	Mxd1	41.533	44.88	47.478	0	0	0	57.705	65.999	14.62	20.188	85.38	85.208	0	22.57	18.404	0	0	0	0	0	0	0	0	0	0	0	0	0	0	0	0	0	0	0	0	0	0	0	0	0	0	0	0	0	0
17121	Mxd3	0	0	0	0	0	0	5.117	6.595	0	3.87	6.465	3.145	2.86	0	7.654	0	0	0	0	0	0	0	0	0	0	0	0	0	0	0	0	0	0	0	0	0	0	0	0	0	0	0	0	0	0
17122	Mxd4	0	0	0	0	0	0	0	0	0	0	0	0	0	0	0	0	0	0	0	0	0	0	0	0	0	0	0	0	0	0	0	0	0	0	0	0	0	0	0	49.316	19.427	29.089	0	0	0
17127	Smad3	0	2.132	1.75	0	0	0	2.357	0	2.242	0	0	0	0	0	0	0	0	0	0	4.095	1.816	0	0	0	3.24	2.942	4.357	0	1.755	4.53	0	0	0	3.877	5.009	5.987	3.207	2.004	4.877	0	0	0	4.521	4.733	0
17129	Smad5	0	0	0	0	0	0	0	0	0	0	0	0	0	0	0	0	0	0	0	11.737	3.776	0	0	0	0	0	0	0	0	0	0	0	0	0	0	0	0	0	0	0	0	0	0	0	0
17133	Maff	73.603	105.161	92.491	0	0	0	46.756	142.96	0	30.543	0	85.619	0	48.217	34.587	100.223	79.325	77.217	104.658	64.208	70.442	0	0	0	0	0	0	0	0	0	0	0	0	0	0	0	0	0	0	0	0	0	0	0	0
17134	Mafg	302.033	170.121	174.368	137.724	52.145	84.862	125.819	160.642	35.699	64.214	125.798	96.56	86.54	108.127	127.806	78.741	81.695	119.256	86.157	278.089	247.356	131.544	199.6	168.011	232.206	217.926	210.991	282.49	305.531	294.717	192.109	146.481	383.408	463.181	426.337	418.97	512.916	401.176	446.232	243.868	342.886	341.816	275.332	359.983	314.677
17135	Mafk	434.017	212.324	191.459	283.976	78.876	84.677	81.87	147.294	67.972	92.325	59.565	115.523	0	60.361	50.751	72.384	55.296	58.16	81.021	124.858	102.612	68.736	75.647	68.057	102.926	97.044	74.865	77.867	81.436	90.688	25.867	44.82	83.364	82.177	88.017	41.555	117.626	116.172	114.784	68.862	75.935	128.573	87.248	87.906	80.831
17187	Max	881.705	1375.69	1226.51	1039.81	1112.59	1336.66	876.614	455.381	979.136	621.08	354.473	395.853	392.793	963.498	898.54	805.458	591.041	762.24	646.976	787.447	795.659	498.341	579.802	619.524	915.016	710.986	714.27	845.588	936.499	935.862	1065.42	735.681	706.834	716.085	728.74	661.54	833.96	666.66	775.419	296.105	545.509	609.378	530	655.733	624.678
17188	Maz	73.762	272.732	166.673	51.631	154.548	258.755	62.736	39.217	116.543	54.355	15.115	20.351	46.796	181.509	174.826	74.353	74.77	105.424	70.265	50.735	0	16.023	74.005	66.259	106.045	50.056	65.575	50.904	49.141	105.315	85.165	88.561	73.997	77.485	99.685	90.246	90.149	79.054	99.441	45.08	123.868	68.389	0	48.67	44.813
17190	Mbd1	26.828	22.035	17.521	12.846	7.65	9.92	6.872	40.271	0	0	0	0	0	0	0	0	0	0	4.056	0	7.23	0	0	0	19.772	0	12.77	22.122	26.058	16.62	12.562	0	30.452	74.847	63.167	40.807	59.107	52.032	38.16	65.41	50.365	51.857	14.192	0	17.899
17191	Mbd2	5.621	17.949	19.688	0	8.791	16.645	5.363	13.82	12.082	27.339	25.78	31.058	29.362	23.262	24.612	24.29	22.717	24.682	56.509	0	12.693	22.718	9.257	11.292	19.803	0	8.953	15.372	14.33	0	10.336	44.614	3.705	17.355	27.394	18.956	21.937	32.208	20.165	105.077	25.976	32.966	0	14.406	11.035
17192	Mbd3	5.068	205.98	29.418	0	142.146	2.367	0	0	0	0	0	0	0	0	0	0	0	0	0	0	0	0	0	0	0	0	0	0	0	0	0.997	2.938	0	6.219	5.934	0	8.269	9.695	7.94	0	0	0	0	0	0
17257	Mecp2	318.526	346.457	349.32	138.57	192.699	204.278	159.305	189.964	137.249	124.558	168	108.181	98.255	263.888	139.5	243.675	208.453	242.91	350.351	475.825	385.23	422.553	695.554	659.252	930.391	794.036	627.46	993.005	1247.08	1077.17	1128.45	866.377	1274.01	1965.48	2259.96	2208.02	2009.18	2353.2	2069.67	3102.12	1778.67	1614.95	1839.36	2146.19	1853.82
17258	Mef2a	0	0	0	0	24.215	19.047	0	0	0	0	0	0	0	0	0	0	0	0	0	0	0	0	0	0	0	33.761	35.093	0	0	0	0	20.627	44.985	0	0	0	0	0	0	0	31.082	43.672	0	0	0
17260	Mef2c	0	0	0	0	0	0	0	0	0	26.627	61.335	0	0	0	0	109.103	124.25	0	0	221.782	232.97	0	0	0	213.156	196.409	0	0	0	0	0	0	0	0	63.981	35.064	49.331	48.539	73.778	0	0	0	0	0	0
17261	Mef2d	4.086	18.137	13.804	18.052	34.057	32.847	17.341	11.484	12.555	0	0	0	22.847	36.054	35.413	32.317	35.901	39.769	27.395	42.938	39.006	18.981	47.552	40.807	45.373	43.465	0	53.766	48.011	0	0	43.604	59.246	0	42.241	47.61	38.427	43.696	39.687	30.708	41.901	55.326	59.966	61.365	58.089
17268	Meis1	58.122	62.348	40.84	17.177	27.635	23.606	11.307	7.726	0	0	0	0	3.592	0	9.547	0	5.439	5.632	0	0	0	0	0	0	0	0	0	0	0	0	0	0	0	0	0	0	0	0	0	0	0	0	0	0	0
17425	Foxk1	23.537	30.1	21.632	25.569	88.485	65.093	40.175	17.18	41.511	35.973	37.783	26.193	37.07	75.629	77.109	65.169	76.542	73.278	43.778	82.507	64.166	13.953	83.233	100.457	64.348	52.323	83.238	101.109	89.69	134.217	56.038	206.809	151.707	90.603	123.252	116.54	190.687	194.657	120.805	107.637	128.117	151.548	69.081	70.446	101.923
17428	Mnt	21.102	109.051	88.186	65.78	96.086	87.115	69.25	95.695	32.573	81.182	51.433	71.803	91.581	35.13	40.365	87.473	13.564	19.165	55.544	31.087	29.584	32.923	57.734	26.916	37.799	8.763	52.465	76.069	43.727	51.899	78.359	122.855	22.01	4.074	20.352	26.123	46.445	24.938	44.743	75.455	53.896	34.105	61.921	0	23.89
17536	Meis2	33.502	15.974	25.077	5.061	8.121	10.524	0	0	0	0	0	0	0	0	0	0	0	0	0	0	0	0	0	0	0	0	0	0	0	0	0	0	0	0	0	0	0	0	0	0	0	0	0	0	0
17859	Mxi1	21.877	19.479	11.325	0	24.707	7.454	8.391	34.324	26.344	0	32.976	39.586	43.423	33.512	44.653	0	36.967	38.723	0	0	0	0	17.248	10.111	0	0	0	0	0	0	0	0	0	0	0	0	0	0	0	0	0	0	0	0	0
17863	Myb	0	0	0	3.119	8.021	7.87	4.406	13.458	10.397	11.557	13.432	10.122	5.692	21.879	12.607	4.118	7.228	15.116	0	17.23	13.127	0	10.702	4.428	0	0	0	0	0	0	0	0	0	0	0	0	0	0	0	0	0	0	0	0	0
17865	Mybl2	0	0	0	0	0	0	0	0	0	0.139	2.264	3.315	0	0	0	0	0	0	0	0	0	0	0	0	0	0	0	0	0	0	0	0	0	0	0	0	0	0	0	0	0	0	0	0	0
17869	Myc	26.726	20.915	23.713	0	5.138	16.032	0	0	0	0	0	0	0	0	0	0	0	0	0	0	0	0	0	0	0	0	0	0	0	0	0	0	0	0	0	0	0	0	0	0	0	0	0	0	0
17876	Myef2	57.314	112.259	93.092	3.41	10.967	7.875	0	0	0	0	0	0	0	0	0	0	0	0	0	0	0	0	0	0	4.825	0	50.31	4.266	0	17.415	6.809	11.247	186.877	200.343	275.354	225.411	394.268	268.063	306.093	587.965	135.4	120.258	272.927	259.027	303.193
18018	Nfatc1	6.57	17.196	16.927	7.894	5.481	2.738	8.724	12.444	6.415	10.762	10.219	16.422	15.307	9.605	9.101	26.363	12.515	15.377	34.315	19.138	20.744	38.576	43.269	28.696	29.957	17.499	15.827	43.089	63.937	39.417	109.767	83.301	43.542	27.1	35.55	38.002	48.768	28.999	41.398	162.675	50.594	56.738	48.515	50.26	49.334
18019	Nfatc2	0	0	0	0	0	0	0	0	0	0	0	0	0	0	0	0	0	0	0	0	0	0	0	0	7.229	5.029	0	0	0	0	14.09	11.453	0	0	0	0	0	0	0	0	0	0	0	0	0
18021	Nfatc3	7.74	21.155	21.388	18.729	25.381	27.024	24.595	16.318	18.503	22.06	19.375	20.274	21.495	21.63	14.672	47.609	46.671	13.519	44.222	57.559	17.803	30.266	84.674	64.621	28.209	26.524	10.358	21.505	19.553	24.293	60.669	32.679	34.791	16.106	18.683	15.577	16.117	22.702	33.276	71.276	49.642	38.685	27.363	25.238	27.15
18022	Nfe2	222.979	129.532	121.589	93.573	64.942	62.576	75.471	116.65	56.907	47.256	77.462	86.546	51.816	32.805	24.952	56.866	22.875	0	61.527	53.887	47.553	19.979	0	18.075	15.208	19.257	20.5	17.789	0	7.975	0	0	0	0	0	0	0	0	0	0	0	0	0	0	0
18024	Nfe2l2	7.249	1.088	0	0	0	0	0	0	0	0	0	0	0	0	0	0	0	0	0	0	0	0	0	0	0	0	0	0	0	0	0	0	0	0	0	0	0	0	0	0	0	0	0	0	0
18027	Nfia	224.503	232.568	292.374	138.687	122.848	123.832	111.407	119.65	99.183	67.861	198.949	192.496	276.244	260.778	284.312	686.797	351.324	357.417	732.171	522.105	435.974	1097.03	929.36	839.295	1139.15	1166.37	1026.62	1316.87	1183.91	1616.9	2842.32	1801.13	4707.13	4294.25	3673.36	4175.84	4141.61	3903.29	4944.09	3866.78	4142.6	4251.62	5454.3	5083.36	3689.73
18028	Nfib	363.841	363.581	310.569	181.343	176.421	195.873	131.84	219.467	204.445	108.457	247.352	249.969	357.901	376.467	406.863	737.294	477.448	415.06	761.494	706.03	639.657	1390.71	1102.66	997.873	1298.51	1363.22	1127.06	1701.2	1556.07	1783.26	3960.37	2166.61	3812.01	3920.42	3827.77	3816.57	3875.6	3249.37	4156.74	3359.47	3753.11	3559.1	4604.41	4233.3	3642.63
18029	Nfic	253.529	165.95	172.328	176.877	97.071	139.45	88.358	126.21	76.886	35.617	140.168	136.639	210.498	175.558	207.755	418.194	228.255	259.388	432.445	305.232	311.806	678.874	557.806	583.291	1031.32	914.844	772.944	716.521	1203.51	1194.67	3136.05	2162.34	4781.2	3821.79	4039.84	4062.25	5063.78	2953.58	3569.05	4304.15	4741.7	5037.66	5066.39	5394.83	4207.93
18030	Nfil3	0	0	0	0	0	0	0	0	0	0	0	0	0	0	0	0	0	0	0	0	0	0	0	0	0	0	0	0	0	0	27.683	15.548	53.967	0	0	0	19.942	13.003	21.849	106.254	37.326	36.64	15.461	0	5.944
18032	Nfix	178.087	107.247	85.083	123.918	80.108	82.244	87.947	112.778	53.71	18.14	140.95	135.769	225.517	119.959	209.111	406.824	214.323	215.405	350.948	296.734	272.658	610.525	514.459	478.887	755.977	603.666	522.307	622.79	629.275	807.798	2450.2	1795.86	3322.82	2900.87	4024.44	3096.33	3106.02	3305.17	3641.47	3254.55	3891.42	3488.75	3426.62	3385.75	2691.72
18033	Nfkb1	4.386	0.863	1.291	5.288	0	1.883	6.772	2.769	4.727	2.741	12.111	3.277	4.095	5.776	4.367	0	12.239	10.799	0	0	0	0	0	0	0	0	0	0	0	0	11.939	6.996	0	0	0	0	0	0	0	13.966	10.613	10.212	21.585	20.11	18.624
18034	Nfkb2	0	0	0	0	0	0	0	0	0	0	0	0	0	0	0	0	0	0	0	0	0	0	0	0	0	0	0	0	0	0	0	0	0	0	0	0	0	0	0	3.955	0.556	0	0	0	0
18044	Nfya	3120.13	3216.66	2436	3143.95	1640.37	1899.53	2243.82	3901.96	1232.84	432.84	1148.67	448.026	2386.06	678.761	615.997	985.086	444.538	486.686	243.741	662.931	551.587	1140.02	857.762	545.583	1709.7	1800.7	1808.63	1473.8	1451.48	1736.25	1473.3	3121.26	784.307	1094.95	1211.04	1188.77	704.38	1077.93	1020.6	1572.67	532.206	576.77	946.947	421.232	741.847
18045	Nfyb	399.628	278.768	386.701	540.534	223.423	254.548	323.041	67.753	130.501	0	0	0	0	0	0	0	0	0	0	0	0	202.871	18.374	0	0	0	0	0	0	0	893.484	625.841	0	0	0	0	0	0	0	0	0	0	0	0	0
18046	Nfyc	5008.59	9392.3	8355.44	6720.28	6691.6	7352.03	4768.39	6618.93	6114.86	918.707	2095.87	893.835	3799.18	3896.75	3009.5	1545.24	1581.1	1760.98	640.026	2666.27	2132.86	2054.85	3661.05	3555.25	7782.73	6367.14	6139.43	6372.17	5912.91	5842.18	4210.18	5034.43	2504.07	4308.43	4760.14	4246.36	3000.47	3040.5	3372.35	3521.28	2429.5	2822.82	2432.09	2432.63	2240.65
18109	Mycn	0	8.161	11.939	0	0	0	0	0	0	0	0	0	0	0	0	0	0	0	0	0	0	0	0	0	0	0	0	0	0	0	0	0	0	0	0	0	0	0	0	0	0	0	0	0	0
18171	Nr1i2	0	0	0	0	0	0	0	0	0	0	0	0	0	0	0	0	0	0	0	0	0	0	9.966	19.476	0	0	0	0	0	0	0	0	0	0	0	0	0	0	0	8.93	4.626	0	0	0	0
18181	Nrf1	148.23	309.53	328.433	512.127	716.49	717.358	590.835	1161.71	900.547	787.912	789.548	976.723	1283.3	1505.62	1733.42	940.031	1078.75	1241.32	591.989	1620.97	1335.14	457.64	1441.4	1175.8	748.622	595.422	730.656	626.111	893.147	837.333	970.972	763.767	446.68	360.691	398.305	474.529	387.982	305.669	378.377	490.712	403.037	412.476	268.858	375.343	337.377
18514	Pbx1	39.221	68.706	58.178	13.899	29.057	30.514	0	0	0	0	0	0	0	0	0	0	0	0	0	0	0	0	0	0	0	0	0	0	0	0	17.332	60.03	2.557	21.024	18.87	27.488	19.431	19.967	11.651	0	0	0	0	0	0
18515	Pbx2	46.84	92.413	106.882	41.649	53.52	54.933	26.317	20.588	23.946	0	1.922	5.107	8.258	12.958	11.062	0	11.025	10.643	5.143	7.255	8.568	2.891	3.156	0	5.105	4.747	0	2.557	5.091	0	11.168	25.704	8.81	9.69	7.531	6.704	12.446	17.233	20.099	22.348	5.649	0	6.154	0	6.956
18516	Pbx3	41.418	53.244	55.51	10.326	18.543	24.835	11.142	15.344	4.833	0	0	0	0	0	0	0	0	0	0	0	0	0	0	0	0	0	0	0	0	0	0	0	0	0	0	0	0	7.601	8.557	0	0	0	0	0	0
18673	Phb	7.178	28.326	59.338	12.319	72.815	35.118	29.521	125.578	181.632	105.233	103.591	98.937	88.909	38.404	48.377	209.204	47.691	44.692	261.328	67.493	71.578	41.545	64.011	56.085	155.108	168.919	72.318	172.932	285.861	398.472	132.902	143.53	114.997	327.921	309.796	270.878	162.471	385.801	287.626	152.799	80.908	109.984	237.583	259.79	241.18
18771	Pknox1	27.63	0	13.563	0	0	0	20.293	18.633	0	0	0	0	0	0	0	0	0	0	0	0	0	0	0	0	0	0	0	0	0	0	0	0	0	0	0	0	0	0	0	0	8.03	8.331	0	0	0
18986	Pou2f1	0	8.435	7.195	33.415	28.852	3.552	55.08	75.915	78.662	5.529	46.068	53.124	61.88	114.198	75.266	5.241	26.136	17.78	54.856	11.765	4.992	0	0	0	0	0	0	0	0	0	0	0	0	0	0	0	0	0	0	0	0	0	0	0	0
19013	Ppara	0	0	0	0	0	0	0	0	0	0	0	0	0	18	16.592	0	28.863	28.128	0	0	0	11.965	1.542	2.501	0	0	0	0	0	0	99.319	110.781	52.127	82.359	62.98	74.028	24.333	45.93	33.307	197.69	47.436	60.04	62.579	56.922	52.62
19016	Pparg	0	0	0	0	0	0	0	0	0	0	0	0	0	0	0	0	0	0	0	0	0	0	0	0	0	0	0	0	0	0	14.597	8.297	0	0	0	0	35.96	20.497	0	0	0	0	0	0	0
19130	Prox1	1.891	5.759	4.698	27.2	13.443	10.771	11.689	11.972	41.802	32.163	65.305	56.634	61.623	48.49	50.527	49.672	49.858	66.845	34.086	61.14	63.135	20.46	37.664	30.367	9.971	21.248	13.346	43.363	34.826	31.969	39.377	106.643	77.413	100.472	127.794	92.882	94.535	105.717	78.948	228.241	47.946	76.365	28.448	57.124	50.891
19290	Pura	7.155	15.944	0	15.269	40.71	21.862	6.961	7.969	116.867	0	25.283	7.327	60.093	144.576	72.488	13.639	36.662	87.464	19.49	127.69	118.28	133.246	138.196	196.763	273.945	174.999	198.06	624.422	519.564	453.892	560.048	292.258	1036.2	981.849	1072.66	975.869	867.872	758.233	660.531	2802.74	637.632	1086.8	865.399	973.108	996.196
19291	Purb	38.299	98.718	121.484	69.266	97.846	155.557	72.177	43.85	174.258	18.741	71.784	55.303	232.676	230.126	308.066	61.873	211.968	240.207	49.48	350.22	237.681	262.532	443.011	416.356	293.479	287.158	337.289	234.332	560.09	556.752	429.668	303.573	745.849	737.384	374.191	658.916	611.814	580.009	667.805	1087.03	778.319	576.032	708.85	728.545	749.161
19401	Rara	3.844	8.52	7.212	0.62	1.516	5.422	1.207	5.939	11.462	0.096	2.396	3.091	7.95	0	3.561	0	2.574	4.902	0	0	0	0	0	0	0	0	0	0	0	0	12.812	14.38	24.44	17.257	0	13.809	9.536	14.392	0	38.85	37.654	10.313	26.739	0	3.316
19411	Rarg	6.201	7.108	9.923	1.267	2.949	3.829	1.563	2.11	1.53	0	0	0	5.083	0	0.645	0	0	0	0	0	0	0	0	0	0	0	0	0	0	0	22.977	20.994	15.202	0	0	0	4.847	10.312	8.953	41.755	10.262	3.441	0	0	0
19664	Rbpj	117.826	359.138	273.211	107.063	375.069	524.678	161.207	330.099	224.595	217.886	246.593	221.017	236.29	387.433	417.138	467.962	375.594	411.156	276.909	349.023	338.802	85.498	350.277	314.296	151.347	241.629	202.763	188.09	237.188	239.779	195.507	263.65	245.027	268.493	288.402	225.192	296.429	289.805	281.768	182.345	241.265	240.383	380.01	182.001	382.496
19712	Rest	20.911	3.759	0.725	0	0.106	15.41	1.666	4.437	0	0	0	0	1.859	1.361	1.311	0	0	0	0	0.527	0.685	0	0	0	0	0.546	0.669	0.943	0	2.088	0	0	0	0	0	0	0	0	0	0	0	0	0	0	0
19724	Rfx1	29.597	76.805	51.737	44.833	44.82	45.752	25.692	23.871	5.702	9.881	3.827	3.159	0	12.503	18.879	24.356	7.76	24.35	19.385	16.475	25.182	11.403	9.912	9.839	20.535	32.468	28.765	37.823	47.786	53.88	48.986	56.165	44.25	71.115	67.513	64.446	58.143	58.15	61.261	113.323	56.908	48.647	35.157	38.622	33.805
19725	Rfx2	8.352	11.83	5.954	12.682	8.91	6.218	19.164	13.279	1.93	0	8.405	4.92	6.371	12.096	22.652	0	2.79	20.971	18.347	12.251	20.593	2.566	1.548	1.523	0	0	0	0	0	0	0	0	0	0	0	0	0	0	0	0	0	0	0	0	0
19726	Rfx3	4.989	12.705	9.713	8.353	5.534	8.895	4.588	2.863	1.352	3.158	3.784	5.599	8.349	5.139	4.282	2.707	4.47	7.176	10.06	7.809	6.641	0	0	0	0	0	0	0	0	0	5.921	9.926	0	0	0	0	0	0	0	9.453	0	3.276	0	0	0
19883	Rora	0	0	0	0	0	0	0	0	0	0	0	0	0	0	0	0	0	0	0	0	0	0	0	0	0	0	0	0	0	0	0	0	0	1.055	0	6.019	16.577	13.762	19.309	0	0	0	0	0	0
19885	Rorc	0	0	0	0	0	0	0	0	0	0	0	0	0	0	0	0	0	0	0	0	0	0	0	0	0	0	0	0	0	0	0	0	0	0	0	0	0	15.103	12.144	8.194	0	2.321	0	0	0
20024	Sub1	427.572	3062.27	3021.41	842.403	6233.01	5138.46	506.099	704.506	5752.02	1242.82	1250.03	1465.24	1415.38	7616.85	6889.55	3531.64	9481.14	9568.04	2337.19	10346.2	8553.11	3029.98	8654.7	8638.42	11912.5	8789.22	12458.4	13601.8	10843.1	11465.6	8007.4	592.066	5760.41	5545.41	6269.12	5959.29	5576	5231.31	4857.9	2542.48	4350.21	4504.81	4634.36	6668.47	5270.19
20181	Rxra	73.334	100.205	60.822	43.931	80.092	73.007	62.152	72.523	66.738	19.615	48.78	26.036	85.873	77.811	90.893	59.1	123.434	134.59	55.869	90.479	99.589	80.004	120.684	119.995	154.642	127.428	118.424	182.345	208.904	217.306	453.371	504.594	926.779	663.985	760.479	764.783	1025.8	1073.51	1168.4	1810.65	1190.93	1276.23	761.691	929.713	1125.39
20182	Rxrb	62.148	89.611	85.021	40.671	61.559	75.556	42.201	85.897	48.641	17.811	44.379	20.083	35.929	28.668	52.368	18.996	54.842	67.874	9.294	23.199	44.988	23.279	30.214	29.924	20.854	11.844	10.194	19.299	27.465	22.276	126.759	129.264	191.382	153.81	154.615	159.567	254.112	198.838	174.567	576.291	294.392	399.749	141.151	162.809	151.276
20183	Rxrg	0	0	0	0	0	0	0	0	0	0	0	0	0	0	0	0	0	0	0	0	0	0	0	0	0	0	0	0	0	0	192.211	132.085	286.67	202.832	227.135	275.881	390.743	337.965	380.107	491.834	364.697	426.381	231.706	229.105	0
20185	Ncor1	0	0	0	0	0	0	0	0	0	0	0	0	0	0	0	0	0	0	0	0	0	0	0	0	0	0	0	0	0	0	0	0	0	0	0	0	0	0	0	4.902	0	2.266	0	0	0
20186	Nr1h4	0	0	0	0	0	0	0	0	0	0	0	0	0	0	0	0	0	0	0	0	0	0	0	0	0	0	0	0	0	0	28.719	28.872	63.331	37.379	52.972	46.615	102.957	115.378	132.904	314.005	105.109	78.102	67.091	75.468	70.038
20230	Satb1	0	0	0	0	2.406	2.658	0	0	0	0	0	0	0	0	0	0	0	0	0	0	0	0	0	0	0	0	0	0	0	0	0	0	0	0	0	0	0	0	0	0	0	0	0	0	0
20588	Smarcc1	15.483	50.283	57.265	14.287	43.528	46.933	33.19	15.932	22.722	20.628	5.633	4.847	8.282	10.405	13.965	32.286	11.849	5.167	13.909	6.3	12.28	7.099	13.912	5.43	26.69	16.097	9.607	33.043	30.457	42.179	21.093	40.777	18.594	27.596	42.243	42.301	28.538	43.019	53.1	51.902	15.248	13.196	16.234	35.156	10.584
20602	Ncor2	0	0	0	0	0	0	0	0	0	0	0	0	0	0	0	0	0	0	0	0	0	0	0	0	0	0	0	0	0	0	0	0	0	0	0	0	0	1.418	42.559	0	0	0	0	0	0
20658	Son	16.79	24.088	22.662	45.198	39.382	52.149	32.985	256	69.877	28.873	43.814	17.936	101.426	114.547	79.797	89.18	36.815	37.28	16.998	45.85	33.816	21.919	74.599	57.248	40.081	47.684	67.437	102.611	106.634	128.473	74.371	119.03	82.764	50.136	64.194	58.54	26.822	20.67	23.861	35.759	51.027	62.664	42.556	38.02	55.762
20668	Sox13	8.624	6.729	2.774	0	0	0	3.425	3.803	0	0	0	0	0	0	0	0	0	0	0	0	0	0	0	0	0	0	0	0	0	0	0	0	0	0	0	0	0	0	0	0	0	0	0	0	0
20678	Sox5	36.618	31.47	32.669	0	0	0	0	0	0	0	0	0	0	0	0	0	0	0	0	0	0	0	6.697	6.633	0	0	0	0	0	0	0	0	0	23.265	0	40.105	22.199	18.984	22.905	21.87	11.776	10.639	0	0	0
20679	Sox6	79.778	56.009	64.528	47.753	39.914	46.339	15.489	18.403	0	0	0	0	0	0	0	0	0	0	0	0	0	0	0	0	0	0	0	0	0	0	8.026	12.176	0	0	0	0	0	0	0	0	0	0	0	0	0
20684	Sp100	0	0	0	0	0	0	0	0	0	0	0	0	0	0	0	0	0	0	0	0	0	0	0	0	0	0	0	0	0	0	5.501	21.937	0	0	0	0	0	0	0	0	0	0	0	0	0
20687	Sp3	524.683	449.763	294.71	544.872	227.043	247.786	399.046	452.723	174.046	297.165	146.662	114.522	221.206	143.258	240.907	0	0	0	0	0	0	0	148.878	151.018	149.449	246.716	139.935	252.955	92.463	152.066	127.088	187.079	100.076	304.862	180.517	313.565	207.119	215.014	172.891	125.788	130.873	109.841	64.7	97.25	64.71
20787	Srebf1	4.03	0	1.426	0	0	0	0	0	0	0	0	0	10.803	3.64	3.175	1.567	2.113	0	0	4.895	6.246	0	0	0	0	0	0	0	0	0	1.749	29.849	0	12.217	9.241	10.486	30.896	26.08	124.681	12.2	5.642	5.258	6.292	0	8.739
20788	Srebf2	2.532	26.786	18.677	0	0	0	0	0	0	0	0	0	0	0	0	0	0	0	0	0	0	0	0	0	0	0	0	0	0	0	2.142	1.954	0	0	0	0	14.989	0	42.404	0	0	0	0	0	0
20807	Srf	0	0	0	78.102	7.484	0	5.279	6.446	5.175	0	0	0	7.729	0	8.349	0	0	0	379.529	0	8.165	0	0	0	0	0	0	0	0	0	0	0	0	0	9.056	633.603	0	0	0	0	0	0	0	0	0
20833	Ssrp1	72.715	92.954	76.286	105.455	27.597	23.135	69.165	159.038	41.143	11.95	28.412	91.762	126.995	102.514	74.582	40.286	5.58	10.394	103.763	71.709	71.712	144.004	86.931	19.512	6.448	9.733	45.102	22.177	81.737	84.938	11.315	64.335	6.569	64.052	10.985	6.263	0	2.992	2.744	2.142	40.021	0	0	0	0
20846	Stat1	0	0	0	0	0	0	0	0	0	0	0	0	0	0	0	0	0	0	0	0	0	0	0	0	1.431	1.871	2.777	0	0	0	0	0	0	0	0	0	0	1.297	2.304	0	0	0	0	0	0
20847	Stat2	0	0	0	0	0	0	0	0	0	0	0	0	0	0	0	0	0	0	0	0	0	0	0	0	0	0	0	0	0	0	0	0	0	3.156	0	4.506	0	0	0	0	0	0	0	0	0
20848	Stat3	0	0	0	0	0	0	0	0	0	0	0	0	0	0	0	1.706	44.731	57.548	0	36.655	42.709	0	51.466	42.02	38.176	31.634	30.234	44.194	39.416	78.08	1.54	5.933	132.231	33.744	2.265	38.442	3.667	4.076	4.654	8.747	48.162	40.614	83.225	102.829	19.29
20851	Stat5b	0	0	0	0	0	0	0	0	0	0	0	0	0	0	0	0	0	0	0	0	0	0	0	0	0	0	0	0	0	0	0	0	0	0	0	0	0	0	0	21.799	3.525	4.644	0	0	0
20893	Bhlhe40	0	0	0	0	0	0	0	0	0	0	0	0	0	0	0	6.849	0	7.284	6.218	8.266	0	0	0	0	0	0	0	0	0	0	18.265	11.094	0	14.163	0	66.633	78.791	8.128	76.953	74.406	3.306	0	0	0	0
21349	Tal1	120.196	208.544	182.21	106.818	211.286	235.088	86.565	38.409	160.504	78.198	17.286	23.295	0	103.645	111.343	61.072	59.893	71.698	18.461	37.007	35.625	0	0	0	43.073	34.756	35.577	14.061	17.434	15.172	0	0	0	0	0	0	0	0	0	0	0	0	0	0	0
21385	Tbx2	0	6.277	5.997	0	0	0	0	0	0	0	0	0	0	6.266	4.005	0	3.245	3.747	0	9.838	5.65	0	7.28	7.787	0	0	0	0	0	0	9.756	41.982	0	0	13.839	6.006	20.553	29.65	16.742	16.804	10.083	0	0	0	0
21386	Tbx3	17.96	20.859	24.486	5.778	23.647	12.128	3.393	4.866	2.972	0	0	0	0	0	0	0	0	0	0	6.434	4.428	0	0	0	6.362	0	2.157	6.081	8.309	0	8.896	50.148	27.626	14.662	19.533	20.708	67.396	53.64	72.939	56.178	18.912	58.132	18.078	19.351	23.899
21405	Hnf1a	29.968	31.584	83.951	38.402	106.189	145.195	53.962	24.912	132.599	0	0	0	5.252	1.944	1.212	30.365	7.65	7.016	17.74	84.501	66.314	27.212	25.87	25.891	245.932	246.843	227.08	258.652	339.241	69.143	338.301	365.942	196.777	248.382	500.445	506.365	608.4	684.083	718.787	1006.58	463.076	436.303	576.3	856.359	752.453
21406	Tcf12	17.647	14.675	16.639	20.58	20.344	12.676	16.999	7.557	0	7.658	4.836	7.001	8.18	7.045	9.444	12.479	5.624	0	12.765	11.164	7.277	11.416	6.752	5.171	0	5.589	6.205	9.049	6.051	6.658	0	0	0	2.76	0	2.765	1.359	2.286	2.901	0	0	0	0	0	0
21410	Hnf1b	12.437	8.746	11.16	13.342	5.318	5.658	0	0	0	0	0	0	2.093	1.839	0	2.376	2.719	0	0	0	0	0	0	0	9.598	13.954	11.172	25.939	25.154	22.842	66.412	59.204	23.163	41.571	37.104	43.087	50.578	53.251	48.682	104.089	25.484	25.807	31.163	28.474	0
21413	Tcf4	8.02	3.838	7.94	8.252	4.397	2.094	0	0	0	0	0	0	0	0	0	0	0	0	0	0	0	0	0	0	0	0	0	0	0	0	0	0	0	0	0	0	4.32	4.19	2.028	0	0	0	0	0	0
21415	Tcf7l1	17.248	9.371	9.634	8.627	6.102	6.382	7.884	16.179	5.446	8.751	12.98	12.168	15.323	17.62	15.271	28.101	13.391	12.645	19.37	18.316	16.318	0	14.411	8.579	0	0	0	0	0	0	20.422	24.394	0	0	0	0	0	0	0	0	0	0	0	0	0
21416	Tcf7l2	8.74	19.448	27.11	0	10.81	13.782	0	0	0	0	0	0	0	23.15	15.53	10.9	12.995	14.506	11.785	56.002	42.803	11.756	72.674	58.843	12.21	18.647	18.052	30.602	30.806	35.089	29.622	15.412	0	0	23.936	24.276	13.679	25.245	25.537	29.753	44.408	29.257	19.665	11.24	24.537
21417	Zeb1	0	0	0	0.859	0	2.847	0.718	1.095	3.373	0	0	0	2.134	4.494	3.813	0	0	0	0	0	0	0	0	0	0	0	0	0	0	0	0	0	0	0	0	0	0	0	0	0	0	0	0	0	0
21422	Tfcp2	12.086	165.871	142.082	3.475	10.562	15.179	0	0	0	0	0	0	0	0	0	0	0	0	0	0	0	0	0	0	0	0	0	0	0	0	0	0	0	282.499	143.994	57.874	55.488	131.244	73.709	101.448	63.872	37.064	7.27	29.939	38.2
21423	Tcf3	55.886	131.282	99.865	22.468	53.378	67.805	25.049	10.116	48.072	16.224	11.194	14.067	13.031	43.842	43.97	22.559	39.047	28.63	11.677	6.176	30.041	28.584	23.548	21.641	15.584	11.765	15.503	0	0	0	16.129	12.57	0	0	0	0	0	0	0	0	0	0	0	0	0
21425	Tfeb	36.987	52.246	35.594	8.674	12.258	15.484	8.388	24.847	0	0	15.763	18.584	0	16.201	18.954	5.291	15.362	18.057	0	0	0	50.029	16.132	14.823	16.058	15.95	22.334	24.601	34.478	32.033	159.83	62.264	43.144	79.319	63.593	47.404	82.716	54.856	50.876	90.517	19.713	53.952	30.792	43.101	22.873
21428	Mlx	17.232	87.043	51.924	49.607	155.258	138.931	111.991	109.549	145.986	132.009	129.986	108.454	106.535	198.111	226.212	267.872	218.152	225.893	165.773	261.993	257.009	226.671	206.303	207.731	352.466	403.49	389.535	531.011	416.445	614.942	450.746	333.962	2275.37	1136.46	817.979	909.015	1777.8	1640.18	1557.16	1663.78	1927.39	1951.97	3260.56	2893.09	2942.82
21429	Ubtf	2660.84	2556.32	2228.91	2488.13	1442.27	1683.26	2884.49	2871.03	1439.55	1091.16	860.668	457.328	1054.45	1273.5	1163.49	1417.51	435.27	565.06	1339.09	730.402	778.465	1630.64	983.159	877.984	479.768	454.449	474.034	698.541	671.724	617.077	730.459	1139.84	317.988	547.832	499.704	645.635	850.728	740.715	670.449	1180.79	328.109	320.386	385.536	349.563	363.711
21676	Tead1	22.461	26.964	51.442	10.152	18.339	16.269	7.223	26.746	0	0	0	0	0	0	0	0	0	0	0	0	0	0	0	0	10.466	18.516	17.673	30.961	34.918	33.54	51.988	33.361	13.772	0	48.713	24.307	26.698	18.907	22.14	27.792	8.77	10.416	0	0	0
21678	Tead3	37.105	54.319	49.284	14.582	10.283	22.222	13.126	11.079	0	0	7.329	7.749	9.507	0	11.522	0	15.621	17.873	0	12.785	12.619	11.77	19.386	16.824	0	25.635	22.764	0	78.057	77.053	57.732	49.841	50.204	66.566	65.819	68.857	59.213	84.729	59.436	43.092	47.932	29.498	76.656	53.494	53.636
21749	Terf1	0.883	1.562	2.84	0	0	0	0	0	0	0	0	0	0	0	0	0	0	0	0	0	0	0	0	0	0	0	0	0	0	0	0	0	0	0	0	0	0	0	0	0	0	0	0	0	0
21750	Terf2	5.862	15.7	17.291	13.455	5.563	10.507	14.995	12.796	6.605	0	8.885	14.713	0	1.444	10.344	0	2.077	1.786	6.642	5.409	7.859	4.365	8.577	5.336	6.649	4.75	2.916	5.705	3.992	3.834	0	0	0	0	4.269	5.59	3.159	5.078	0	0	0	0	0	0	0
21780	Tfam	5732.47	3062.49	2751.4	2633.7	1577.8	1889.47	1560.37	1007.17	1080.41	1177.04	1082.66	1480.78	1323.75	2294.01	2039.32	2582.81	2853.49	3474.93	3838.59	5028.33	5270.95	9374.39	6408.49	5288.24	6996.6	7579.07	7850.45	12342.1	10893.2	10680.3	12683.5	9632.98	28327.1	21206	17413	18206.2	21406.2	21538.3	21533.3	16128.1	28956.3	30890.8	26001.9	26853.8	26513
21781	Tfdp1	39.562	78.202	63.039	44.205	52.708	52.581	52.543	91.606	32.617	24.621	30.274	34.79	22.827	46.803	37.754	44.454	32.465	36.743	17.316	25.903	21.233	15.388	12.063	14.546	0	0	0	0	0	0	18.161	45.924	0	0	0	0	11.008	0	12.208	0	0	0	0	0	0
21815	Tgif1	2.294	0	2.838	0	0	0	0	0	0	0	0	0	0	0	0	0	0	0	0	0	0	0	0	0	0	0	0	0	0	0	0	0	0	0	0	0	0	0	0	0	0	0	0	0	0
21833	Thra	6.993	10.962	9.292	5.813	8.026	10.092	0	23.782	7.547	0	0	0	4.777	0	9.987	0	4.459	8.238	0	0	0	0	0	0	0	0	0	0	0	0	0	0	0	0	0	0	9.96	0	8.94	11.864	6.953	0	0	0	0
21834	Thrb	0	0	0	0	0	0	0	0	0	0	0	0	0	0	0	0	0	0	0	0	0	0	0	0	0	0	0	0	0	0	5.788	1.963	6.163	61.852	71.621	4.68	13.032	43.812	13.862	21.395	13.194	11.382	9.625	0	10.094
22025	Nr2c1	65.185	53.331	37.074	30.563	12.411	16.487	6.558	34.94	0	0	0	0	0	0	0	0	0	0	0	0	0	0	0	0	0	0	0	0	0	0	0	0	0	0	0	0	0	0	0	0	0	0	0	0	0
22026	Nr2c2	295.387	121.373	99.55	139.681	45.364	51.102	72.828	99.79	44.904	3.701	11.569	9.196	17.515	37.733	21.735	0	21.346	14.754	0	0	0	6.211	8.477	7.376	18.516	5.329	6.839	0	0	0	6.366	12.307	60.156	19.862	29.517	21.604	37.119	66.497	33.932	88.064	69.649	48.739	22.218	37.851	41.852
22130	Ttf1	0	0.583	1.458	0	2.111	2.953	0	0	0	0	0	0	0	0	0	0	0	0	0	0	0	0	0	0	0	0	0	0	0	0	0	0	0	0	0	0	3.72	2.647	2.521	33.637	0	5.636	8.256	0	9.541
22221	Ubp1	106.353	676.101	584.453	20.051	89.025	98.921	8.455	0	20.67	0	0	0	0	2.735	16.403	2.312	25.376	23.91	0	0	0	1.512	0	21.119	6.565	1.66	7.01	17.204	26.089	25.679	0	38.239	343.694	260.127	371.755	374.83	324.693	289.721	298.709	455.249	315.377	297.319	256.949	283.065	247.39
22259	Nr1h3	0	0	0	0	0	0	0	0	0	0	0	0	0	0	0	0	0	0	0	0	0	0	0	0	0	0	0	0	0	0	0	0	0	122.063	0	16.648	99.317	78.196	8.477	68.915	9.065	13.66	295.771	0	478.796
22260	Nr1h2	1.019	1.153	0	0	0	0	0	0	0	0	0	0	0	0	0	0	0	0	0	0	0	0	0	0	0	0	0	1.71	1.697	0	0	0	0	8.477	0	18.044	0	4.387	8.352	77.508	22.826	23.16	8.304	0	10.468
22278	Usf1	520.192	443.491	475.652	325.136	126.635	280.168	312.127	153.066	213.497	135.77	102.099	203.139	199.254	198.519	111.256	271.585	91.254	100.595	293.919	34.487	66.904	205.457	163.383	140.379	0	20.006	10.196	24.292	13.944	31.886	405.583	264.974	89.765	127.599	126.921	125.373	151.425	173.96	116.836	473.261	186.458	177.06	117.422	116.444	151.081
22282	Usf2	271.263	199.206	195.968	230.429	88.835	0	0	0	0	0	0	0	0	0	0	0	0	0	0	0	0	0	0	0	0	0	0	0	0	0	0	0	0	0	0	0	0	72.942	74.818	0	0	0	0	0	0
22344	Vezf1	64.474	111.851	67.452	0	0	0	24.332	27.814	48.2	0	0	0	5.889	0	38.067	12.922	29.509	18.469	0	0	0	7.799	24.879	27.945	0	0	0	0	0	0	28.165	48.909	0	61.749	78.062	49.192	65.513	52.446	77.125	24.226	57.129	59.158	39.777	43.124	45.719
22404	Wiz	88.434	139.066	134.01	29.763	23.476	20.225	10.549	9.252	2.648	0	0	0	0	0	0	0	0	0	0	0	0	0	0	0	3.813	3.391	3.046	2.24	4.394	6.752	0	0	0	10.099	13.417	10.691	19.888	31.461	19.176	23.669	0	5.456	20.734	10.58	0
22433	Xbp1	5.851	2.279	0	0	0	0	0	0	0	0	0	0	0	0	0	0	0	0	0	0	0	0	0	0	0	0	0	0	0	0	0	0	0	0	0	0	19.446	13.801	18.99	29.354	27.837	20.666	0	0	0
22608	Ybx1	1387.15	2140.26	2193.12	1119.37	2006.92	2633.07	430.257	1255.08	1452.07	298.099	1003.16	291.904	702.11	980.822	638.814	0	496.897	1117.05	599.497	1127.62	632.947	682.183	1320.37	1199.25	2140.33	2493.12	2402.54	2650.21	2651.25	2393.3	1081.29	2581.22	1167.57	4467.54	2826.75	3550.98	629.704	597.393	612.395	1241.09	863.291	884.102	1476.31	1064.61	1445.44
22632	Yy1	142.896	611.956	477.507	251.797	767.027	1024.88	346.206	131.557	583.382	291.262	70.712	50.557	94.228	327.346	432.575	442.17	178.752	215.024	160.893	91.294	0	77.769	140.125	124.053	382.03	364.138	320.606	346.726	373.13	401.47	206.347	249.024	895.694	589.144	780.786	702.49	663.74	695.547	678.801	723.416	818.441	712.372	721.995	693.867	650.924
22642	Zbtb17	0	0	0	0	0	0	0	0	0	0	0	0	0	0	0	0	0	0	0	0	0	0	0	0	0	0	0	0	0	0	0	0	0	0	0	0	1.171	0.533	0.519	0	0	0	0	0	0
22661	Zfp148	83.797	174.22	148.501	46.045	44.861	50.209	19.106	16.865	12.058	0	0	0	0	12.803	11.607	17.977	12.236	11.371	20.65	19.439	12.695	21.974	32.214	25.98	79.443	74.886	73.005	99.823	111.412	101.809	77.546	60.54	156.751	264.67	303.264	266.983	248.667	218.401	231.847	258.121	178.005	149.501	144.926	159.998	117.345
22680	Zfp207	0	15.113	17.987	3.667	11.859	14.491	0	0	0	0	0	0	0	0	0	0	0	0	0	0	0	0	0	0	0	0	0	0	0	0	0	0	0	6.699	12.18	19.983	12.219	21.295	17.991	0	0	0	0	0	0
22720	Zfp62	0	0	0	0	0	0	2.891	1.533	0	0	0	0	5.632	0	1.926	0	0	0	0	0	0	2.428	0	0.269	0	0	0	0	0	0	0	0	0	0	0	0	0	0	0	0	0	0	0	0	0
22724	Zbtb7b	0	0	0	0	0	0	0	0	0	0	0	0	0	0	0	0	0	0	0	0	0	0	0	0	0	10.388	6.597	0	0	0	0	0	0	34.888	32.029	32.695	78.646	81.938	87.175	92.728	36.039	43.194	40.363	47	45.289
22761	Zfpm1	14.094	26.442	18.554	2.062	17.949	19.596	4.35	8.175	6.016	0	0	0	1.123	1.556	1.837	0	0	0	0	2.819	1.463	0	0	0	0	0	0	0	0	0	0	0.764	9.887	0	3.365	3.141	4.304	9.408	9.292	17.894	10.328	10.894	7.154	26.177	20.287
22764	Zfx	31.033	24.397	18.667	21.956	11.912	13.503	10.083	0	4.589	0	0	0	0	3.711	3.597	0	0	0	0	0	0	12.913	4.914	7.638	21.108	18.978	18.06	18.684	18.589	18.035	11.438	0	25.315	51.413	47.811	43.222	45.339	49.665	50.3	22.584	40.035	34.629	21.994	22.062	24.922
22770	Zhx1	0	0	0	0	0	0	1.887	2.921	0	2.069	2.522	4.355	6.799	2.239	3.156	0	0	0	0	3.072	4.351	0	0	0	0	0	0	0	0	0	0	20.217	9.373	11.048	6.523	0	15.92	16.803	10.528	37.221	16.058	19.874	7.796	0	3.37
22778	Ikzf1	43.586	44.017	43.186	9.092	28.42	30.863	13.584	7.747	19.612	0	0	0	9.76	13.193	0	0	0	0	0	0	0	4.732	0	7.831	13.486	10.719	12.668	0	13.776	10.902	0	0	0	0	0	0	0	0	0	0	0	0	0	0	0
22779	Ikzf2	3.576	0	3.344	0	0	0	0	0	0	0	0	0	0	0	0	0	0	0	0	0	0	0	0	0	0	0	0	0	0	0	0	0	0	0	0	0	0	0	0	0	0	0	0	0	0
22780	Ikzf3	0	0	0	0	0	0	0	0	0	0	0	0	0	0	0	0	0	0	0	0	0	4.663	8.221	6.895	5.978	4.059	4.791	0	0	0	0	0	0	0	0	0	0	0	0	0	0	0	0	0	0
22791	Dnajc2	0	6.324	7.194	2.627	13.487	3.647	9.967	11.074	26.32	5.478	7.008	9.001	6.14	7.736	22.565	12.068	3.193	10.967	0	4.651	5.72	1.894	6.021	5.225	12.446	10.157	3.823	6.649	11.425	0	0	0	0	0	2.56	3.131	0	0	0	0	0	0	0	0	0
23872	Ets2	0	0	0	0	0	0	0	0	0	0	0	0	0	0	0	0	0	0	0	15.779	13.558	0	22.967	19.136	0	0	0	0	0	0	0	0	0	0	0	0	0	0	0	0	0	0	0	0	0
23942	Mta2	13.294	39.187	32.41	5.428	22.245	22.998	8.111	18.866	7.764	10.477	11.101	19.249	22.386	9.181	6.504	29.923	9.662	12.529	30.919	9.983	20.623	9.055	13.157	9.246	27.429	12.823	13.607	20.78	14.009	28.306	16.982	35.302	33.906	18.245	30.546	37.366	33.015	54.54	48.533	46.433	30.175	42.884	16.047	20.282	18.178
24136	Zeb2	11.203	37.546	4.897	2.546	8.145	7.936	4.176	0.517	8.25	0	0	0	3.333	4.663	6.85	5.568	6.015	1.811	0	1.724	1.313	0	2.008	3.009	0	6.234	3.341	6.207	8.372	14.846	5.008	17.324	13.062	3.11	9.925	0.529	6.13	7.192	3.316	3.71	1.984	2.702	0	3.924	9.084
26379	Esrra	161.087	92.898	65.688	144.132	53.285	67.613	61.411	93.718	31.213	28.947	38.204	16.64	45.783	41.992	44.852	34.761	53.617	62.826	40.725	24.704	25.198	42.676	99.343	76.667	127.648	72.604	73.915	118.021	97.612	89.689	356.392	238.134	638.73	657.946	672.492	536.984	736.882	704.848	783.663	1286.94	665.081	618.978	551.117	695.446	575.509
26381	Esrrg	0	0	0	0	0	0	0	0	0	0	0	0	0	0	0	0	0	0	0	0	0	0	0	0	0	0	0	10.294	6.203	0	70.526	118.394	4.791	222.221	95.937	102.301	151.683	152.76	186.888	13.03	5.772	5.718	0	0	0
26424	Nr5a2	13.928	0	2.645	0	0	0	0	0	0	0	0	0	0	0	0	0	0	0	0	0	0	0	0	0	0	0	0	0	0	0	0	0	0	43.383	39.156	31.935	67.697	73.474	69.747	164.319	50.181	35.683	0	18.562	35.373
27056	Irf5	0	0	0	0	0	0	0	0	0	0	0	0	0	0	0	0	0	0	0	0	0	0	0	0	0	0	0	0	0	0	0	0	0	0	0	0	0	0	0	23.535	1.676	0	0	0	0
29808	Mga	29.514	22.236	18.797	8.401	399.715	5.236	6.021	6.651	2.387	2.138	5.033	3.392	3.619	5.014	4.761	0	3.377	4.187	1.702	4.446	3.136	3.358	2.674	2.051	4.801	2.843	0	2.749	2.004	2.906	3.773	4.914	2.166	1.421	0.889	1.64	2.481	1.977	2.569	4.401	1.267	0.864	0	0	0
30046	Zfp292	12.433	4.332	3.956	2.854	3.794	2.375	2.313	3.603	1.553	0	0	0	0	0	0	1.223	0.366	0	1.778	0.294	0	0	0	0	0	0	0	0	0	0	1.595	7.874	0	0	0	0	0	0	0	0	0	0	0	0	0
30942	Hnf4g	36.41	18.035	19.479	0	0	0	25.882	36.515	0	0	0	0	0	0	0	0	0	0	0	0	0	0	0	0	0	0	0	0	0	0	0	0	0	0	0	0	0	0	0	0	0	0	0	0	0
50496	E2f6	5.925	25.016	27.15	3.443	12.496	5.797	0	0	0	0	0	0	0	0	0	0	0	0	0	0	0	0	0	0	0	0	0	0	0	0	0	0	0	0	0	0	0	0	0	0	0	0	0	0	0
50794	Klf13	39.713	56.555	36.221	67.836	72.234	75.964	50.371	41.158	35.355	0	0	0	31.338	46.905	42.103	34.202	20.585	2.231	58.491	0	33.155	41.608	77.531	68.203	51.412	28.998	30.714	22.137	51.726	29.518	14.047	49.274	0	54.77	46.801	49.373	42.121	69.626	42.432	13.307	20.266	11.501	0	0	0
50907	Preb	0	0	0	0	0	0	4.438	6.192	6.889	8.53	25.71	19.055	51.865	33.379	19.209	272.856	27.818	32.984	102.081	42.862	39.437	9.586	16.903	10.603	7.301	16.839	8.168	24.438	26.109	50.461	17.773	155.083	29.15	31.956	15.239	25.381	6.088	21.794	14.347	37.624	18.486	24.975	43.706	64.48	61.626
52397	Zfp644	381.972	49.226	74.265	0	0	0	1.356	1.512	0	0	0	0	0	0	0	0	0	0	0	0	0	0	0	0	0	0	0	0	0	0	0	0	0	0	0	0	0	0	0	0	0	0	0	0	0
52679	E2f7	0	0	0	0	0.542	0.48	0.127	0.77	0	0	0	0	0	0	0	0	0	0	0	0	0	0	0	0	0	0	0	0	0	0	0	0	0	0	0	0	0	0	0	0	0	0	0	0	0
53417	Hif3a	0	0	0	0	0	0	5.22	8.786	0	32.501	27.317	44.454	38.981	48.903	37.416	42.892	27.186	35.651	26.162	9.823	0	0	0	0	0	0	0	0	0	0	0	0	0	0	0	0	0	0	0	0	0	0	0	0	0
53970	Rfx5	4.585	9.101	5.762	3.404	14.745	11.421	0	20.11	1.757	0	33.706	8.588	43.427	28.849	19.67	6.25	6.764	3.992	12.167	30.443	1.115	1.603	6.945	20.318	33.726	16.112	13.718	23.029	26.103	25.196	38.415	30.069	30.783	33.915	32.951	68.552	29.313	38.692	39.193	77.371	18.174	20.013	23.036	25.527	12.172
54006	Deaf1	0	7.241	12.175	0	0	0	0	0	0	0	0	0	0	0	0	0	0	0	0	0	0	0	0	0	0	0	0	0	0	0	0	0	0	0	0	0	0	0	0	0	0	0	0	0	0
54131	Irf3	11.35	38.807	39.798	13.401	57.974	68.279	34.325	22.686	72.651	43.552	36.543	21.671	26.004	86.163	78.103	55.475	112.319	114.205	59.068	171.228	175.557	35.795	55.829	75.785	75.431	86.789	77.708	115.968	103.408	133.047	76.357	47.407	390.326	151.799	125.088	187.38	135.538	215.217	185.171	284.456	578.273	495.662	374.382	652.639	554.241
54367	Zfp326	0	2.352	1.426	0	0	0	0	0	0	0	0	0	0	0	0	0	0	0	0	0	0	0	0	0	0	0	0	0	0	0	0	0	0	13.579	13.841	36.102	0	0	0	22.015	12.874	6.942	9.203	0	8.814
54380	Smarcal1	1.77	10.953	10.226	15.873	54.914	54.423	39.114	74.945	92.319	22.691	87.245	56.66	111.594	123.682	106.281	38.175	104.532	114.606	33.976	69.595	65.64	31.514	66.705	51.177	45.139	39.053	16.327	9.871	8.637	11.629	22.017	26.513	99.798	3.081	44.781	4.341	10.173	8.121	55.02	34.013	29.704	30.174	114.559	36.987	114.435
54446	Nfat5	0	0	0	2.257	4.31	11.572	3.256	0	12.649	3.005	0	6.527	6.961	7.14	7.434	0	6.71	5.218	4.052	8.276	7.826	2.099	7.1	6.54	6.164	5.809	5.039	21.069	8.454	25.068	33.075	8.343	14.632	32.113	21.834	28.263	14.771	21.937	12.675	33.502	22.303	13.813	14.185	17.786	27.941
54601	Foxo4	0	0	0	0	0	0	7.155	17.809	5.725	4.775	8.714	0	14.716	3.849	5.176	0	0	0	15.66	2.779	0	0	0	0	0	0	0	0	0	0	7.24	4.342	0	0	0	0	0	0	0	15.833	6.476	0	0	0	0
56218	Patz1	45.214	59.631	37.265	0	42.347	52.259	0	10.618	28.769	0	0	0	6.045	0	21.295	9.643	16.82	8.462	0	0	0	0	0	0	0	0	0	0	0	0	0	0	0	32.431	32.86	0	31.72	13.916	33.318	0	0	0	0	0	0
56380	Arid3b	0	2.707	2.432	0	0	0	0	0	0	0	4.979	3.968	3.387	4.762	4.486	0	0	0	0	0	0	0	0	0	0	0	0	0	0	0	0	0	0	0	0	0	0	0	0	0	0	0	0	0	0
56449	Ybx3	653.451	505.885	570.42	755.792	884.585	1167.45	507.125	1019.27	1047.6	138.599	672.501	275.012	402.298	514.889	656.394	394.47	482.096	678.654	308.568	596.72	538.22	368.24	656.701	616.222	815.874	991.127	1076.95	1252.87	762.983	698.393	474.646	1386.5	380.015	1221.18	806.563	901.598	267.178	256.978	273.87	373.756	262.781	212.738	339.669	371.05	0
56458	Foxo1	0	0	0	0	136.898	196.826	170.414	10.909	0	5.823	11.271	10.469	14.748	303.549	313.889	14.938	305.201	392.649	25.518	19.594	0	10.141	378.235	360.221	0	0	0	0	0	0	423.251	25.054	0	632.053	3481.77	560.977	403.903	3072.93	450.663	86.421	35.385	595.299	0	0	0
56469	Pias1	0	6.496	5.502	0	3.744	5.859	2.783	3.421	7.899	0	0	0	0	0	0	0	0	0	0	0	0	0	0	0	8.122	2.326	9.223	2.49	31.662	11.742	6.461	10.861	0	0	0	0	12.543	1.889	6.14	23.822	11.971	13.808	0	0	0
56484	Foxo3	5.795	1.591	0	11.746	31.528	54.344	24.133	41.125	36.163	19.267	71.479	73.324	71.402	71.781	62.336	39.246	48.16	32.565	23.389	11.525	37.43	0	11.903	14.165	0	0	0	0	0	0	0	0	0	0	0	0	0	0	0	0	0	0	0	0	0
56490	Zbtb20	0	0	0	0	0	0	0	0	0	0	0	0	0	0	0	0	0	0	0	0	0	0	0	0	0	0	0	2.239	6.674	8.785	11.411	36.62	800.908	222.361	232.23	206.311	410.151	446.822	404.083	1476.09	1208.61	1131.38	545.483	479.043	485.245
56501	Elf4	50.657	36.335	30.126	0	0	0	29.336	31.449	0	23.878	32.184	39.698	32.547	15.17	13.99	25.884	16.022	8.519	41.674	26.147	21.055	82.688	30.811	25.286	18.401	20.375	12.658	0	0	0	30.244	51.833	0	17.386	17.488	15.881	0	0	0	0	0	0	0	0	0
56809	Gmeb1	0	0	0	3.125	7.454	6.853	0	0	0	0	0	0	0	0	0	0	4.623	5.658	0	0	0	0	0	0	0	0	0	0	0	0	0	0	0	0	0	0	0	0	0	0	0	0	0	0	0
57247	Zfp276	0	0	0	0	0	0	0	0	0	0	0	0	0	0	0	0	0	0	0	0	0	0	0	0	0	0	0	0	0	0	0	0	0	0	0	0	3.483	0	3.966	0	0	0	0	0	0
57376	Smarce1	18.593	55.519	58.321	12.411	40.014	42.375	28.939	7.59	33.082	10.097	0	0.557	7.561	21.084	20.319	7.575	14.891	10.498	5.787	8.693	5.727	14.51	17.557	10.775	50.347	46.279	51.518	92.035	51.822	42.239	53.663	79.559	47.261	69.999	60.986	90.771	99.976	94.35	111.299	133.627	44.036	51.429	53.014	61.689	21.298
58180	Hic2	30.475	48.816	30.69	0	0	0	0	0	0	0	0	0	0	0	0	0	0	0	0	0	0	0	0	0	0	0	0	0	0	0	0	0	0	0	0	0	0	0	0	0	0	0	0	0	0
58198	Sall1	0	0	0	0	0	0	0	0	0	0	0	0	0	0	0	0	0	0	0	0	0	0	0	0	0	0	0	0	0	0	0.781	5.093	0	1.229	2.849	0	5.61	5.053	3.567	0	0	0	0	0	0
58805	Mlxipl	2.495	17.207	11.604	10.084	23.079	29.996	13.899	28.11	15.922	13.224	25.001	21.81	23.896	30.275	28.995	32.114	36.71	31.6	20.885	45.66	26.474	30.83	32.328	23.11	60.148	63.468	58.241	70.964	87.22	99.826	131.632	79.774	615.898	153.608	170.628	138.092	389.461	327.845	344.135	662.78	543.327	409.395	590.742	671.664	613.879
58887	Repin1	0	0	0	0	0	0	0	0	0	0	0	0	0	0	0	0	0	0	1.032	3.886	0	0	8.771	5.87	0	0	0	0	0	0	0	0	0	0	0	0	0	0	0	0	0	0	0	0	0
59004	Pias4	4.631	93.531	81.646	9.575	56.146	47.69	0	0	0	0	0	0	0	0	0	0	4.523	4.719	0	3.999	3.896	0	0	0	0	0	0	0	0	0	0	0	0	5.487	7.391	7.096	3.655	4.155	0	11.095	55.897	3.812	0	0	0
60611	Foxj2	0	0	0	0	2.282	5.31	0	0	0	0	0	0	0	0	0	0	49.44	7.27	0	0	0	0	7.552	6.591	0	0	0	0	0	0	0	0	0	0	0	0	0	0	0	0	0	0	0	0	0
64050	Yeats4	0	9.37	7.949	2.776	8.979	8.73	0	0	0	0	0	0	0	0	0	0	0	0	0	0	0	0	0	0	0	0	0	0	0	0	0	0	0	0	0	0	0	0	0	0	0	0	0	0	0
66867	Hmg20a	127.124	53.385	67.423	64.057	156.607	26.716	12.569	13.766	0	0	0	0	0	90.279	7.726	0	0	0	0	8.275	12.271	0	9.444	10.204	82.58	122.794	138.189	165.993	143.259	178.554	217.085	199.314	14.36	395.298	169.376	388.273	96.174	149.099	77.194	73.75	0	18.926	24.134	34.636	34.009
66923	Pbrm1	8.588	21.98	24.641	9.363	31.581	32.869	10.061	13.241	13.287	11.701	2.007	5.224	27.819	5.095	10.321	8.762	16.987	8.497	8.863	9.826	14.647	5.146	5.945	8.826	37.429	27.81	24.387	27.622	28.935	28.046	25.195	26.97	8.112	47.288	39.559	58.189	35.96	37.813	30.983	50.848	17.042	13.12	15.705	13.063	10.936
67210	Gatad1	0	4.064	2.776	0	0	0	0	0	0	0	0	0	0	0	0	0	0	0	0	0	0	0	0	0	0	0	0	0	0	0	0	0	0	0	0	0	0	0	0	0	0	0	0	0	0
67255	Zfp422	0	0	0	0	0	0	0	0	0	0	0	0	0	0	0	0	0	0	0	17.595	20.812	0	46.787	26.368	0	0	0	0	0	0	0	0	0	8.868	21.032	0	0	0	0	0	0	0	0	0	0
67367	Paxbp1	0	0	0	0	0	0	0	0	0	0	0	0	0	0	0	0	0	0	0	0	0	0	0	0	0	0	0	0	0	0	0	0	0	1.235	4.099	0	0	0	0	0	0	0	0	0	0
68094	Smarcc2	4.693	31.424	43.96	7.229	43.022	41.816	15.194	7.056	32.774	4.332	0.727	1.105	2.377	8.999	13.393	4.603	9.54	3.354	3.717	18.581	12.464	6.077	22.513	16.111	63.001	51.751	34.143	106.141	88.712	98.926	36.044	54.295	136.396	176.689	153.958	153.198	139.418	165.441	162.517	168.548	65.234	74.071	74.434	111.462	74.825
68750	Rreb1	32.332	48.278	46.534	13.66	23.431	29.808	12.125	5.82	9.722	12.098	5.09	7.586	4.923	13.962	12.836	20.713	19.228	19.254	19.043	14.254	12.169	14.656	11.203	8.656	15.188	15.301	17.153	29.509	34.315	34.156	49.371	56.034	61.075	83.571	80.468	70.16	74.343	77.632	92.472	65.619	63.691	151.079	35.438	72.558	63.907
68837	Foxk2	14.528	41.294	29.857	25.905	47.61	67.017	40.29	43.938	54.774	31.229	36.511	20.006	34.625	50.038	52.99	51.078	47.116	37.566	0	48.907	21.385	0	44.568	52.86	17.518	19.649	15.291	28.448	56.263	58.259	9.724	9.585	0	23.227	29.349	31.794	47.091	46.98	0	0	46.223	54.077	0	0	0
69257	Elf2	64.429	73.565	63.645	75.622	18.909	59.231	84.758	142.998	37.998	34.919	100.687	38.135	84.724	64.903	66.094	43.948	76.629	46.585	50.649	66.428	56.623	64.148	72.746	63.264	41.574	60.674	54.587	85.429	16.961	42.633	88.067	69.408	24.857	107.332	104.523	103.013	96.164	92.336	88.072	155.405	20.994	22.343	23.362	28.054	27.067
69890	Zfp219	6.278	6.919	4.348	0	5.287	10.53	2.741	3.775	3.155	0	0	0	0	0	0	0	2.108	1.633	0	0	0	0	0	0	0	0	0	0	0	0	0.366	10.16	3.293	11.235	7.559	6.178	9.555	0	16.112	13.362	4.93	0	1.51	1.597	1.822
71268	Lrrfip2	0	24.598	8.055	0	210.462	283.599	216.612	47.554	232.857	1.434	3.542	1.874	16.318	303.718	273.897	3.979	441.706	435.783	4.116	295.486	3.443	0	248.18	237.018	62.127	43.056	55.705	646.216	799.269	61.746	15.323	38.812	1552.4	170.492	116.604	1150.4	284.44	252.614	278.14	503.532	213.09	1253.36	1253.51	1344.7	1262.8
71371	Arid5b	0	0	0	0	0	0	0	0	0	0	0	0	0	0	0	0	1.769	1.961	0	0	0	0	0	0	0	0	0	0	0	0	0	1.677	1.492	0	0	0	2.297	0	1.707	0	0	0	0	0	0
71702	Cdc5l	0.482	19.246	21.476	1.166	4.532	5.748	9.359	6.739	24.792	0	0	0	0	20.249	26.189	22.572	4.926	5.529	0	24.788	25.397	16.706	47.606	39.409	13.299	21.348	23.378	31.755	15.142	52.984	8.181	10.231	357.255	229.797	252.826	261.742	25.752	257.952	32.289	26.874	213.959	17.688	276.155	260.959	280.168
72567	Bclaf1	13.492	62.499	48.643	7.653	1.774	4.223	2.461	17.083	4.435	0	0	0	0	2.524	3.166	0	0	0	0	0	0	0	4.656	1.87	0	0	0	0	0	0	0	0	0	11.2	10.85	8.941	9.304	9.163	24.981	0	11.324	14.041	15.759	22.467	22.238
72611	Zfp655	0	0	0	0	0	0	2.018	1.972	0	0	0	0	0	0	0	0	0	0	0	0	0	0	0	0	0	0	0	0	0	0	0	0	0	0	0	0	0	0	0	0	0	0	0	0	0
72739	Zkscan3	0	0	0	0	0	0	0	0	0	0	0	0	0	0	0	0	0	0	0	0	0	0	0	0	0	0	0	0	0	0	0	0	0	0	0	0	0	1.21	1.426	0	9.474	29.431	26.635	0	49.911
73181	Nfatc4	1.539	2.648	2.453	0	0	0	0	0	0	0	0	0	0	8.105	6.07	4.196	8.519	4.827	4.986	8.424	3.759	13.575	5.239	3.607	0	0	0	3.308	4.566	0	6.284	2.716	0	0	0	0	0	0	0	0	0	0	0	0	0
73389	Hbp1	0	0	0	0	0	0	0	0	0	0	0	0	0	0	0	0	9.866	14.782	0	10.795	9.132	0	18.472	14.231	0	0	0	0	0	0	0	11.78	16.13	0	0	0	0	0	0	0	0	0	0	0	0
73754	Thap1	32.315	18.538	6.951	0	6.014	6.503	0	0	0	0	0	0	0	0	0	0	0	0	0	0	0	0	0	0	0	0	0	0	0	0	0	0	0	0	0	0	6.09	0	6.832	0	0	0	0	0	0
74123	Foxp4	1.777	5.083	5.017	1.761	5.18	6.316	4.662	5.325	1.995	2.307	2.985	4.68	10.543	0	3.6	0	0	0	0	3.16	1.635	0	0	0	3.406	2.622	2.57	0	0	0	8.185	57.124	15.763	7.396	8.864	8.065	14.149	12.091	10.548	48.1	12.346	22	11.029	12.382	11.15
76022	Gon4l	0	0	0	0	0	0	0	0	0	0.816	0	0.341	0	0	0	0	0	0	0	0	0	0	0	0	0	0	0	0	0	0	0	0	0	0	0	0	0	0	0	0	0	0	0	0	0
77044	Arid2	1.658	7.364	8.995	1.016	8.799	10.551	0.702	1.56	3.824	0	0	0	0	0.883	0.992	0	0	0	0.651	0	0.719	0	0.777	1.302	2.925	7.414	5.019	6.728	6.201	4.421	2.735	5.137	0	6.214	9.672	8.519	7.488	8.115	8.788	8.702	3.461	3.256	1.529	2.634	0
77862	Thyn1	49.686	241.877	180.174	41.051	120.659	124.389	13.424	12.366	0	0	0	0	0	0	0	0	0	0	0	0	0	0	0	0	78.108	71.129	65.765	81.665	61.671	54.55	69.319	69.646	240.099	149.629	130.699	191.584	183.658	285.605	255.047	297.721	315.497	289.513	250.083	159.086	213.475
78266	Zfp687	5.157	4.884	7.526	5.852	6.651	11.489	0	0	0	0	0	0	0	0	0	0	0	0	0	0	0	0	0	0	3.435	5.304	2.004	5.872	0	4.244	0	9.089	3.651	3.62	3.035	5.087	2.76	5.992	0	4.872	2.033	1.351	0	0	0
78912	Sp2	7.695	2.236	3.433	0	0	0	0	0	0	0	0	0	0	0	0	0	0	0	0	0	0	0	0	0	0	0	0	0	0	0	0	0	0	0	0	0	0	0	0	0	0	0	0	0	0
80892	Zfhx4	6.474	1.16	0.765	0	0	0	0	0	0	0	0	0	0	0	0	0	0	0	0	0	0	0	0	0	0	0	0	0	0	0	0	0	0	1.329	0.983	1.108	0.648	0.805	0	0	0	0	0	0	0
83383	Tfap4	273.864	152.823	198.769	162.263	88.986	101.04	118.391	200.893	41.474	27.61	94.38	84.32	84.23	40.124	66.042	37.071	25.383	42.036	55.293	34.46	66.031	50.566	28.086	26.104	14.709	7.072	9.31	10.792	8.297	0	148.432	47.965	0	0	3.969	3.302	0	5.843	3.79	0	0	0	0	0	0
83925	Trps1	4.912	5.857	4.624	0	0	0	0.667	0.82	0	0	0	0	0	0	0	0	0	0	0	0	0	0	0	0	0	0	0	0	0	0	0	0	0	0	0	0	0	0	0	0	0	0	0	0	0
93760	Arid1a	3.585	33.932	19.562	2.377	13.316	21.883	10.465	10.151	14.563	5.361	9.163	13.863	15.621	6.078	6.651	7.831	10.928	12.052	4.032	6.138	4.337	0	4.395	4.395	12.743	10.262	10	14.9	14.614	16.598	7.333	14.746	6.566	15.908	17.478	18.26	13.556	18.305	17.267	23.141	8.724	5.471	10.682	7.479	6.66
93761	Smarca1	255.537	233.674	222.341	129.369	213.266	233.264	179.713	187.633	235.993	120.091	96.385	131.057	157.158	166.349	178.546	150.182	145.456	149.869	159.432	204.502	150.845	117.548	153.089	110.145	117.751	96.318	83.916	125.985	143.988	116.86	143.726	91.688	0	86.251	0	116.034	57.341	77.381	0	0	0	0	0	0	0
94246	Arid4b	2.561	1.221	0	0	0	0	0	0	0	0	0	0	0	0	0	0	0	0	0	0	0	0	0	0	0	0	0	0	0	0	0	0	0	0	0	0	0	0	0	0	0	0	0	0	0
97165	Hmgb2	18750.8	16400.3	17227.6	31365.9	27791.4	28730.4	38209.7	34003	36167.2	55099.3	49210.1	57169.6	53781.6	40771.7	41179.5	45160.8	38517.6	35131.7	37421.9	31305.1	34225.8	34566.1	27686.8	32639.4	29805.4	29099	25346.1	20670	20508.6	22734.6	15083	22283.1	3727.52	9673.49	9142.64	10824.8	7006.17	7495.7	7609.63	4369.18	3432.25	3134.59	5119.57	2161.27	2415.33
98999	Znfx1	0	0	0	0	0	0	0	0	0	0	0	0	0	0	0	0	0	0	0	0	0	0	0	0	0	0	0	0	0	0	0	2.049	2.241	0	0	0	0	1.169	1.408	3.233	1.845	3.548	5.169	1.738	3.907
99377	Sall4	1.936	3.095	2.892	0	0	0	0	0	0	0	0	0	0	0	0	0	0	0	0	0	0	0	0	0	0	0	0	0	0	0	0	0	0	0	0	0	0	0	0	0	0	0	0	0	0
100090	Zbtb48	4.459	4.568	2.862	5.418	0.748	0	0	0	0	0	0	0	0	0	0	0	0	0	0	0	0	0	0	0	0	0	0	0	0	0	0	0	0	2.28	0	30.224	18.453	2.597	12.605	0	0	0	0	0	0
104383	Rcor2	11.985	26.148	9.877	0	0	0	0	0	0	0	0	0	0	0	0	0	0	0	0	0	0	0	0	0	0	0	0	0	0	0	0	0	0	0	0	0	0	0	0	0	0	0	0	0	0
104394	E2f4	72.448	158.673	117.239	138.063	328.521	324.848	228.006	393.121	315.728	221.38	293.129	329.152	276.888	157.364	150.513	169.798	126.641	140.714	95.618	69.268	67.877	62.946	40.828	31.477	69.611	69.99	68.774	68.153	71.485	71.627	74.203	85.554	39.448	37.189	50.354	16.379	33.723	45.146	42.53	62.61	40.766	34.328	34.959	13.656	44.984
108655	Foxp1	31.01	56.994	37.474	30.482	46.321	59.596	30.461	29.94	45.325	30.128	0	10.341	61.59	44.937	42.969	56.153	31.057	67.364	66.761	46.348	22.482	16.066	48.143	44.661	32.849	35.244	41.228	43.316	43.145	43.767	38.785	97.618	93.148	84.04	56.243	91.965	93.923	73.361	93.377	199.058	96.11	84.319	42.697	60.117	57.597
108899	2700081O15Rik	8.54	2.645	2.565	0	0	0	0	0	0	0	0	0	0	0	0	0	0	0	0	0	0	0	0	0	0	0	0	0	0	0	0	0	0	0	0	0	0	0	0	0	0	0	0	0	0
108961	E2f8	2.44	1.427	0.844	0	2.128	1.091	125.872	97.092	0	0	115.028	32.309	54.402	0.545	1.172	0	0	0	0	0	0	0	0	0	0	0	0	0	0	0	0	0	0	0	0	0	0	0	0	0	0	0	0	0	0
109032	Sp110	0	0	0	0	0	0	0	0	0	0	0	0	0	0	0	12.096	0	11.17	22.512	16.163	13.844	23.15	0	23.514	0	0	0	0	0	0	33.527	28.521	0	0	0	0	0	0	0	0	0	0	0	0	0
109263	Rlf	2.633	5.277	4.16	4.182	5.436	8.899	4.034	5.067	2.551	0	0	0	0	0	0	0	0	0	0	0	0	0	0	0	6.617	3.042	0	0	0	0	0.831	2.963	0	0	0	0	0	0	0	0	0	0	0	0	0
110593	Prdm2	5.068	0	3.041	1.514	0.067	0.453	0	0	0	0	0	0	0	0	0	0	0	0	0	0	0	0	0	0	0	0	0	0	0	0	0	0	0	28.456	21.605	11.094	4.207	4.23	19.411	8.964	7.258	16.994	3.076	33.755	31.67
110794	Cebpe	0	0	0	0	0	0	0	0	0	0	29.011	20.512	0	0	0	0	0	0	0	0	0	0	0	0	0	0	0	0	36.56	33.276	0	0	0	0	0	0	0	0	0	0	0	0	0	0	0
116848	Baz2a	6.836	4.29	6.284	2.518	8.839	7.112	4.48	4.314	5.138	6.313	5.118	8.911	4.048	8.364	7.521	11.661	9.036	11.737	11.427	22.817	16.57	7.822	13.071	16.182	13.852	4.366	14.176	19.717	18.379	27.047	24.134	21.042	5.144	5.752	8.93	6.473	14.493	95.992	94.964	68.472	2.754	6.595	7.813	6.008	8.61
116870	Mta1	5.753	11.238	17.712	5.697	2.556	3.18	3.429	2.489	0	1.493	0	2.188	0	0	0	0	0	0	12.959	2.028	0	0	0	0	0	0	0	0	4.091	4.083	0	0	0	5.848	6.182	0	2.503	13.419	11.463	14.574	2.521	3.386	0	0	0
116871	Mta3	0	11.75	10.505	1.988	6.54	0	0	0	0	0	0	0	0	0	0	0	0	0	0	0	0	0	0	0	0	0	0	0	0	0	5.449	12.412	0	8.214	8.876	0	9.22	13.021	0	0	0	0	0	0	0
195522	Zfp691	0	0	0	0	0	0	0	0	0	0	0	0	0	0	0	0	0	0	0	0	0	0	0	0	0	0	0	0	0	0	0	0	0	0	0	0	0	0	0	6.065	5.193	0	0	0	0
208677	Creb3l3	0	0	0	0	0	0	0	0	0	0	0	0	0	0	0	0	0	0	0	7.643	7.37	0	36.209	23.868	0	0	0	0	0	0	21.615	35.269	79.398	0	0	0	0	0	0	38.057	9.81	6.293	0	0	0
208968	Zfp280c	2.181	2.036	2.371	2.653	0	2.534	0	0	0	0	0	0	0	0	0	0	0	0	0	0	0	0	0	0	0	0	0	0	0	0	3.518	3.943	0	0	0	0	0	0	0	0	0	0	0	0	0
209446	Tfe3	29.42	45.623	24.141	10.154	0	7.982	0	0	0	0	0	0	0	0	0	0	0	0	0	0	0	0	0	0	12.218	13.248	0	0	22.834	16.268	34.547	12.84	16.077	32.82	0	30.691	34.134	0	38.056	60.897	21.347	21.576	23.026	20.419	24.269
211586	Tfdp2	35.141	36.242	14.617	44.407	36.394	33.976	48.929	118.125	29.988	55.606	96.831	87.759	108.473	83.144	44.712	46.194	53.299	40.344	27.674	45.045	19.567	28.75	45.561	23.95	0	0	0	0	0	0	35.621	39.537	0	0	0	0	0	0	0	23.323	8.69	0	0	0	0
212391	Lcor	0	0	0	0	2.057	5.897	3.516	2.055	2.482	1.243	0	2.562	0	0	0	0	0	0	8.656	13.974	8.187	0	0	0	0	0	0	2.901	7.32	0	9.976	23.387	0	0	0	0	0	0	0	0	0	0	0	0	0
213054	Gabpb2	86.423	198.697	152.69	151.12	230.14	218.365	220.856	210.865	365.813	177.691	229.281	213.33	189.917	459.915	441.373	180.672	210.814	307.41	98.712	476.699	290.685	111.876	314.368	313.286	398.938	206.234	229.821	211.272	211.883	285.062	478.111	194.602	115.346	257.819	264.332	241.577	183.864	184.428	137.73	149.413	178.528	153.019	140.389	169.729	53.801
214742	Rcor3	0	0	0	0	0	0	0	0	0	0	0	0	0	14.094	13.047	0	0	0	0	0	0	0	13.889	1.526	22.18	22.019	14.826	36.546	36.6	39.11	27.471	25.669	36.548	69.173	60.336	71.096	57.966	49.519	51.691	58.61	34.333	46.753	23.765	35.712	0
214812	Zfp609	1.881	0	1.382	0	0	0	0	0	0	0	0	0	0	0	0	0	0	0	0	0	0	0	0	0	0	0	0	0	0	0	0	0	0	0	0	0	0	0	0	0	0	0	0	0	0
217864	Rcor1	87.833	203.294	171.719	40.969	136.702	170.455	70.056	24.089	66.41	24.109	4.33	5.364	21.779	65.636	60.583	32.811	70.874	72.651	16.763	37.461	48.559	31.151	58.608	25.58	70.547	62.369	71.247	129.945	140.96	150.738	150.347	669.395	124.13	328.312	255.194	313.398	326.252	278.403	292.358	309.227	232.62	276.112	192.585	249.942	170.594
218772	Rarb	12.339	13.146	12.069	5.737	6.88	8.749	1.999	2.456	0	0	0	0	0	0	0	0	0	0	0	0	0	0	0	0	0	0	0	0	0	0	3.601	9.553	5.253	16.179	17.418	16.487	15.707	17.978	15.18	8.792	4.658	7.729	0	0	0
219150	Hmbox1	12.259	33.255	31.971	3.468	7.86	10.72	0	0	0	0	0	0	0	0	0	0	0	0	0	0	0	0	0	0	12.539	12.257	10.128	23.599	32.698	19.559	15.186	20.464	0	51.417	49.765	44.756	58.204	44.72	50.148	46.233	22.036	20.522	0	0	0
223922	Atf7	24.097	57.459	27.009	5.63	14.65	14.148	16.098	23.425	14.369	10.113	16.869	0	0	11.743	7.668	17.213	20.331	18.733	7.236	7.898	6.91	5.612	0	4.507	0	0	0	0	0	0	0	0	0	0	0	0	11.6	10.231	9.941	107.545	14.444	10.604	0	0	0
224481	Tfb1m	0	0	0	0	0	0	0	0	0	0	0	0	0	0	0	0	0	0	4.508	4.777	5.123	0	0	0	0	0	0	0	0	0	5.811	29.089	0	8.712	10.726	10.943	8.543	7.709	5.901	0	0	0	0	0	0
225631	Onecut2	10.999	13.351	13.276	0	0	0	3.767	9.802	0	1.931	15.649	18.326	0	0	0	0	0	0	0	43.081	36.885	0	0	0	0	0	0	0	0	0	69.58	56.53	76.279	32.67	44.802	52.712	99.919	113.056	112.588	255.807	0	101.457	0	107.758	102.066
226442	Zfp281	20.416	1.441	0	0	0	0	0	0	0	0	0	0	0	0	0	0	0	0	0	0	0	0	0	0	0	0	0	0	0	0	3.177	27.722	11.178	4.246	9.384	13.228	12.559	8.181	10.248	40.104	15.952	7.003	10.063	13.627	14.648
226641	Atf6	0	0	0	0	0	0	1.23	1.375	0	0	0	0	0	0	0	0	0	0	0	0	0	0	0	0	0	0	0	0	0	0	0	0	0	0	0	0	0	0	0	0	0	0	0	0	0
226747	Ahctf1	362.806	324.719	431.98	125.129	85.274	87.844	53.726	43.058	24.187	12.256	9.834	8.565	9.949	6.236	7.154	6.169	7.582	9.603	9.444	8.678	8.697	11.174	9.833	11.536	193.883	36.128	33.751	54.674	52.337	48.175	39.323	83.067	96.19	189.459	199.097	209.852	255.468	265.419	253.546	338.783	101.975	97.113	83.623	103.353	81.088
228839	Tgif2	19.743	14.103	9.16	13.065	8.232	5.187	13.317	10.588	0	0	0	0	0	0	0	0	0	0	0	0	0	0	24.872	23.049	0	0	0	0	0	0	0	0	0	0	0	0	0	0	0	0	0	0	0	0	0
228911	Tshz2	0.327	0	2.592	0	0	0	0	0	0	0	0	0	0	0	0	0	0	0	0	0	0	0	0	0	0	0	0	0	0	0	0	0	0	0	0	0	0	0	0	0	0	0	0	0	0
229004	Gmeb2	0	0	0	4.295	0	8.75	0	0	0	0	0	0	0	0	0	0	0	0	0	0	0	0	0	0	0	0	0	0	0	0	0	0	0	0	0	0	0	0	0	0	0	0	0	0	0
229055	Zbtb10	6.569	6.535	131.514	0	0	0	0	0	0	0	0	0	0	0	0	0	0	0	0	0	0	0	0	0	0	0	0	0	0	0	0	0	0	0	0	0	0	0	0	0	0	0	0	0	0
229542	Gatad2b	9.198	26.743	22.146	2.504	6.098	6.936	0	0	0	0	0	0	0	0	0	0	0	0	0	0	0	0	0	0	0	0	0	0	0	0	0	7.863	11.869	8.546	8.043	14.655	6.871	10.615	19.991	11.53	4.374	3.798	0	0	0
229663	Csde1	0	0	0	0	0	0	3.948	0	4.45	0	0	0	0	0	0	0	0	0	0	0	0	0	0	0	0	0	0	0	0	0	0	0	0	0	0	0	0	0	0	0	7.813	2.587	0	0	0
230700	Foxj3	0	6.148	1.984	0	32.372	25.778	17.291	34.278	30.659	0	39.078	21.345	49.358	55.659	65.853	0	48.282	49.926	15.611	27.928	48.286	0	43.453	19.61	7.109	10.191	6.549	16.8	21.865	21.217	34.485	0	4.864	7.893	0	7.367	6.066	7.061	10.304	0	12.757	24.694	15.389	36.168	0
230761	Zfp362	3.353	9.129	12.423	0	0	0	0	0	0	0	0	0	0	0	0	0	0	0	0	0	0	0	0	0	0	0	0	0	0	0	2.751	9.525	0	13.004	0	14.626	0	0	0	0	0	0	0	0	0
231051	Kmt2c	0.14	1.375	0.936	0	0	0	0	0	0	0	0	0	0	0	0	0	0	0	0	0	0	0	0	0	0	0	0	0	0	0	0	0	0	0	0	0	0.735	0	0.303	0	0	0	0	0	0
231151	Tada2b	0	2.678	1.827	0	2.087	2.392	0	0	0	0	0	0	0	0	0	0	0	0	0	0	0	0	0	0	0	0	0	0	0	0	0	2.332	1.433	0	0	0	1.536	6.137	6.787	0	0	0	0	0	0
232879	Zbtb45	0	0	0	0	0	0	0	0	0	0	0	0	0	0	0	0	0	0	0	0	0	0	0	0	0	0	0	0	0	0	0	0	0	37.837	54.316	30.487	71.313	55.828	66.42	0	156.75	107.176	0	0	0
233410	Zfp592	0	0	0	0	0	0	0	0	0	0	0	0	0	0	0	0	0	0	0	0	0	0	0	0	0	0	0	0	0	0	0	0	0	4.193	5.423	0	6.81	5.49	5.541	5.128	12.597	5.98	4.295	0	4.274
235134	Nfrkb	28.732	52.776	49.446	18.004	73.045	59.318	17.808	19.97	12.731	0	0	0	1.586	1.415	1.035	0	4.942	13.243	0	24.366	0.748	0	5.114	31.081	15.367	21.754	14.206	23.461	31.155	26.602	14.456	34.057	98.024	52.91	77.823	50.187	83.242	86.274	107.443	142.454	109.124	95.422	63.826	77.502	85.433
237339	L3mbtl3	40.875	44.192	34.412	5.001	3.967	3.087	0	0	0	0	0	0	0	0	0	0	0	0	0	0	0	0	0	0	0	0	0	0	0	0	0	0	0	0	0	0	0	0	0	0	0	0	0	0	0
238247	Arid4a	17.128	4.56	4.204	0	0	0	0	0	0	0	0	0	0	0	0	0	0	0	0	0	0	0	0	0	0	0	0	0	0	0	0	0	0	0	0	0	0	0	0	0	0	0	0	0	0
238317	Elmsan1	9.585	19.019	12.56	4.086	5.232	5.397	0	0	0	0	0	0	0	0	0	0	0	0	0	0	0	0	0	0	0	0	0	0	0	0	0	0	0	5.906	7.508	6.996	8.954	6.74	7.238	0	0	0	0	0	0
239985	Arid1b	0	0	0	0	0	0	0	0	0	0	0	0	0	0	0	0	0	0	0	0	0	0	0	0	2.537	0	2.089	2.793	2.552	4.433	1.587	2.605	6.879	8.815	3.072	6.975	7.758	4.884	4.061	10.314	4.657	4.142	2.211	2.269	2.563
241311	Zbtb34	0	0	0	0	0.866	1.111	0	0	0	0	0	0	0	0	0	0	0	0	0	0	0	0	0	0	0	0	0	0	0	0	0	0	0	0	0	0	0	0	0	0	0	0	0	0	0
242705	E2f2	54.752	75.655	70.635	80.914	124.563	146.579	124.328	164.41	128.466	180.25	236.736	185.028	143.333	221.019	224.873	272.977	175.621	175.46	183.822	101.097	86.573	99.179	78.554	66.272	77.345	47.726	66.854	53.183	46.336	46.728	57.461	49.741	0	0	0	0	7.882	15.431	12.598	0	0	0	0	0	0
244216	Zfp771	0	0	0	0	0	0	10.398	4.071	0	0	0	0	0	0	0	0	0	0	0	0	0	0	0	0	0	0	0	0	0	0	0	0	0	0	0	0	0	0	0	0	0	0	0	0	0
246086	Onecut3	9.268	0	14.586	0	0	0	0	0	0	0	0	0	0	0	0	0	0	0	0	0	0	0	0	0	0	0	0	0	0	0	0	0	0	0	0	0	0	0	0	0	0	0	0	0	0
252838	Tox	0	0	0	0	0	0	0	0	0	0	0	0	0	0	0	0	0	0	0	0	0	0	21.579	17.826	0	0	0	0	0	0	0	0	0	0	0	0	0	0	0	0	0	0	0	0	0
268469	Zfp652	0	0	0	0	0	0	0	0	0	0	0	0	0	15.418	12.911	4.252	12.174	13.784	0	0	0	0	0	0	0	0	0	0	0	0	2.426	10.915	8.903	16.366	16.749	7.353	12.436	7.579	8.751	8.645	13.775	19.436	0	0	0
268741	Tox4	2.085	26.24	31.713	2.601	26.498	28.538	0	0	0	0	0	0	0	0	0	0	0	0	0	0	0	0	0	0	12.849	13.42	14.001	15.927	0	17.16	2.066	0	19.823	0	27.452	24.73	29.408	53.05	29.229	0	0	0	33.791	0	29.221
269639	Zfp512	98.953	41.793	39.717	57.578	29.361	32.139	46.392	29.293	22.599	29.076	6.421	4.392	9.893	19.457	27.932	58.501	8.599	12.145	45.77	19.566	21.253	24.688	109.813	99.536	24.754	17.752	20.021	12.093	26.63	26.208	18.461	60.654	68.197	82.016	113.285	98.009	103.875	112.613	80.961	206.376	64.504	53.038	25.411	36.721	27.292
269800	Zfp384	2.93	9.825	9.03	0	4.196	4.241	0	0	0	0	0	0	0	0	0	0	0	0	0	0	0	0	0	0	0	0	0	13.836	13.317	12.036	21.306	660.427	11.126	30.264	21.016	33.522	13.856	20.251	14.595	27.718	19.979	18.919	8.583	0	15.159
272382	Spib	0	0	0	0	0	0	0	0	0	0	0	0	0	0	0	0	0	0	0	0	0	0	28.835	16.964	0	0	0	0	0	0	0	0	0	0	0	0	0	0	0	0	0	0	0	0	0
319758	Rfx7	1.507	1.066	1.712	2.271	1.978	1.33	2.204	1.47	0	0	0.743	1.03	0	0	0	0	0	0	0	0	0	0	0	0	0	0	0	0	0	0	0	0	0	0	0	0	0	0	0	0	0	0	0	0	0
320394	Cenpt	0	0	0	0	0	0	5.506	1.874	0	0	4.406	5.502	0	0	0	0	0	0	0	0	0	0	0	0	0	0	0	0	0	0	0	0	0	0	0	0	0	0	0	0	0	0	0	0	0
320683	Zfp629	0	0	0	0	0	0	0	0	0	0	0	0	0	0	0	2.407	0	1.761	0	0	0	0.771	3.972	3.793	0	0	0	0	0	0	0.489	1.87	0	0	0	0	0	0	0	0	0	0	0	0	0
320799	Zhx3	0	0	0	0	0	0	0	0	0	0	0	0	0	0	0	0	0	0	0	0	0	0	0	0	0	0	0	0	0	0	0	0	0	14.301	20.262	13.02	41.867	15.965	25.089	100.665	37.532	33.734	0	24.519	19.092
329002	Zfp236	4.834	1.496	2.06	0.863	1.704	1.698	0.417	1.969	0	0	0	0	0	0	0	1.834	0.54	0.909	0	0	0	0.51	0	0.584	0	0.209	0.339	0	0	0	0	0	0	1.187	1.782	0.64	0.822	0.948	1.413	0.109	0.679	0	0	0	0
380912	Zfp395	1.255	6.991	8.75	0	0	0	0	0	0	0	0	0	0	0	0	0	0	0	0	0	0	0	0	0	0	0	0	0	0	0	0	0	0	0	0	0	0	0	0	0	0	0	0	0	0
382066	Prdm10	19.063	13.509	15.318	13.327	13.785	14.707	14.403	17.73	14.321	7.223	10.77	17.934	22.195	15.624	11.104	15.082	7.829	9.094	0	7.102	3.649	5.546	4.825	6.051	2.232	1.34	4.24	0	0	0	0	0	0	3.512	6.041	5.582	8.257	6.953	8.125	0	0	0	0	0	0
387609	Zhx2	0	0	0	0	0	0	0	0	0	0	0	0	0	0	0	0	0	0	0	0	0	0	0	0	0	0	0	0	0	0	0	0.676	139.76	17.617	19.695	26.565	83.077	93.98	96.082	117.223	183.531	146.248	99.847	95.683	105.354
407823	Baz2b	41.012	42.128	36.906	27.615	21.39	16.852	22.961	14.547	9.991	7.753	8.659	11.522	7.118	15.374	18.409	11.175	7.132	8.373	13.794	19.338	22.537	27.903	26.029	18.718	26.095	24.133	26.186	15.167	11.882	25.245	24.744	17.366	0	5.71	11.581	10.506	16.703	17.211	19.377	11.162	24.578	3.407	3.571	4.304	2.771
627049	Zfp800	6.699	11.111	8.332	33.416	28.373	35.837	24.669	34.082	31.08	7.268	0	3.598	20.451	21.889	24.801	12.807	5.57	12.095	0	21.451	14.8	15.347	16.626	5.104	24.421	20.335	30.697	26.58	34.801	9.2	13.389	43.176	22.203	6.956	33.687	32.037	21.923	26.543	28.591	0	30.44	13.16	30.228	27.743	31.597

## Sheet: Sheet4
Gene.ID	GeneSymbol	FDR	E12.5 R1	E12.5 R2	E12.5 R3	E13.5 R1	E13.5 R2	E13.5 R3	E14.5 R1	E14.5 R2	E14.5 R3	E15.5 R1	E15.5 R2	E15.5 R3	E16.5 R1	E16.5 R2	E16.5 R3	E17.5 R1	E17.5 R2	E17.5 R3	E18.5 R1	E18.5 R2	E18.5 R3	D1 R1	D1 R2	D1 R3	D3 R1	D3 R2	D3 R3	D5 R1	D5 R2	D5 R3	W1 R1	W1 R2	W2 R1	W2 R2	W2 R3	W3 R1	W3 R2	W3 R3	W6 R1	W6 R2	W6 R3	W8 R1	W8 R2	W8 R3
108899	2700081O15Rik	0.00177248	8.54	2.645	2.565	0	0	0	0	0	0	0	0	0	0	0	0	0	0	0	0	0	0	0	0	0	0	0	0	0	0	0	0	0	0	0	0	0	0	0	0	0	0	0	0	0
11538	Adnp	3.2e-09	1.054	1.743	1.797	0.862	2.318	1.355	0	0	0	0	0	0	0	0	0	0	0	0	0	0	0	0	0	0	0	0	0	0	1.688	1.571	0	0	0	0	0	0	0	0	0	0	0	0	0	0
226747	Ahctf1	2.42e-07	362.806	324.719	431.98	125.129	85.274	87.844	53.726	43.058	24.187	12.256	9.834	8.565	9.949	6.236	7.154	6.169	7.582	9.603	9.444	8.678	8.697	11.174	9.833	11.536	193.883	36.128	33.751	54.674	52.337	48.175	39.323	83.067	189.459	199.097	209.852	255.468	265.419	253.546	338.783	101.975	97.113	83.623	103.353	81.088
93760	Arid1a	0.0331782	3.585	33.932	19.562	2.377	13.316	21.883	10.465	10.151	14.563	5.361	9.163	13.863	15.621	6.078	6.651	7.831	10.928	12.052	4.032	6.138	4.337	0	4.395	4.395	12.743	10.262	10	14.9	14.614	16.598	7.333	14.746	15.908	17.478	18.26	13.556	18.305	17.267	23.141	8.724	5.471	10.682	7.479	6.66
239985	Arid1b	1.15e-09	0	0	0	0	0	0	0	0	0	0	0	0	0	0	0	0	0	0	0	0	0	0	0	0	2.537	0	2.089	2.793	2.552	4.433	1.587	2.605	8.815	3.072	6.975	7.758	4.884	4.061	10.314	4.657	4.142	2.211	2.269	2.563
77044	Arid2	2.91e-06	1.658	7.364	8.995	1.016	8.799	10.551	0.702	1.56	3.824	0	0	0	0	0.883	0.992	0	0	0	0.651	0	0.719	0	0.777	1.302	2.925	7.414	5.019	6.728	6.201	4.421	2.735	5.137	6.214	9.672	8.519	7.488	8.115	8.788	8.702	3.461	3.256	1.529	2.634	0
13496	Arid3a	2.47e-06	6.083	21.685	21.538	6.365	7.209	7.078	4.128	6.525	4.278	4.064	8.378	10.546	14.674	0	7.102	5.772	4.59	10.08	6.377	0	7.2	3.896	4.895	5.705	2.308	2.985	1.966	0	4.681	5.478	0	0	0	0	0	0	0	0	0	0	0	0	0	0
56380	Arid3b	0.0999726	0	2.707	2.432	0	0	0	0	0	0	0	4.979	3.968	3.387	4.762	4.486	0	0	0	0	0	0	0	0	0	0	0	0	0	0	0	0	0	0	0	0	0	0	0	0	0	0	0	0	0
238247	Arid4a	0.0035475	17.128	4.56	4.204	0	0	0	0	0	0	0	0	0	0	0	0	0	0	0	0	0	0	0	0	0	0	0	0	0	0	0	0	0	0	0	0	0	0	0	0	0	0	0	0	0
94246	Arid4b	0.00860803	2.561	1.221	0	0	0	0	0	0	0	0	0	0	0	0	0	0	0	0	0	0	0	0	0	0	0	0	0	0	0	0	0	0	0	0	0	0	0	0	0	0	0	0	0	0
71371	Arid5b	0.764647	0	0	0	0	0	0	0	0	0	0	0	0	0	0	0	0	1.769	1.961	0	0	0	0	0	0	0	0	0	0	0	0	0	1.677	0	0	0	2.297	0	1.707	0	0	0	0	0	0
11863	Arnt	1.59e-05	12.533	14.639	21.205	13.128	23.897	20.54	15.703	64.9	22.94	26.418	78.025	74.537	107.464	58.831	49.933	73.068	57.972	58.306	46.284	36.097	24.239	0	0	0	0	5.597	9.946	15.636	9.484	18.079	10.831	12.191	0	0	0	0	3.519	1.958	0	0	0	0	0	0
11865	Arntl	0.00765332	1.433	6.259	9.934	8.711	27.359	12.164	13.18	11.019	29.714	6.411	9.288	12.59	21.069	26.623	14.26	33.207	362.368	454.65	50.645	339.872	128.279	88.306	324.803	262.138	24.599	8.299	8.396	29.218	20.28	29.824	69.91	55.552	132.838	55.667	106.634	191.324	174.694	182.477	420.115	276.997	640.465	1541.02	303.948	396.854
11908	Atf1	0.217124	0	0	0	0	0	0	0	0	0	0	0	0	0	0	0	0	0	0	0	0	0	0	0	0	0	0	0	0	0	0	0	0	0	0	0	0	0	0	30.396	70.055	0	0	0	0
226641	Atf6	0.430736	0	0	0	0	0	0	1.23	1.375	0	0	0	0	0	0	0	0	0	0	0	0	0	0	0	0	0	0	0	0	0	0	0	0	0	0	0	0	0	0	0	0	0	0	0	0
223922	Atf7	0.126488	24.097	57.459	27.009	5.63	14.65	14.148	16.098	23.425	14.369	10.113	16.869	0	0	11.743	7.668	17.213	20.331	18.733	7.236	7.898	6.91	5.612	0	4.507	0	0	0	0	0	0	0	0	0	0	0	11.6	10.231	9.941	107.545	14.444	10.604	0	0	0
116848	Baz2a	0.0950656	6.836	4.29	6.284	2.518	8.839	7.112	4.48	4.314	5.138	6.313	5.118	8.911	4.048	8.364	7.521	11.661	9.036	11.737	11.427	22.817	16.57	7.822	13.071	16.182	13.852	4.366	14.176	19.717	18.379	27.047	24.134	21.042	5.752	8.93	6.473	14.493	95.992	94.964	68.472	2.754	6.595	7.813	6.008	8.61
407823	Baz2b	4.15e-05	41.012	42.128	36.906	27.615	21.39	16.852	22.961	14.547	9.991	7.753	8.659	11.522	7.118	15.374	18.409	11.175	7.132	8.373	13.794	19.338	22.537	27.903	26.029	18.718	26.095	24.133	26.186	15.167	11.882	25.245	24.744	17.366	5.71	11.581	10.506	16.703	17.211	19.377	11.162	24.578	3.407	3.571	4.304	2.771
14025	Bcl11a	2.64e-08	10.052	12.193	14.741	9.362	7.728	9.134	6.043	14.977	6.064	0	0	0	0	0	0	0	0	0	0	0	0	0	0	0	0	0	0	0	0	0	0	0	0	0	0	0	0	0	0	0	0	0	0	0
12053	Bcl6	0.0191516	0	0	0	0	0	0	0	0	0	0	0	0	0	0	0	0	0	0	0	0	0	0	0	0	0	0	0	0	0	0	0	0	0	0	0	0	0	0	33.783	16.261	34.268	0	14.072	0.598
72567	Bclaf1	0.000229123	13.492	62.499	48.643	7.653	1.774	4.223	2.461	17.083	4.435	0	0	0	0	2.524	3.166	0	0	0	0	0	0	0	4.656	1.87	0	0	0	0	0	0	0	0	11.2	10.85	8.941	9.304	9.163	24.981	0	11.324	14.041	15.759	22.467	22.238
20893	Bhlhe40	0.00639496	0	0	0	0	0	0	0	0	0	0	0	0	0	0	0	6.849	0	7.284	6.218	8.266	0	0	0	0	0	0	0	0	0	0	18.265	11.094	14.163	0	66.633	78.791	8.128	76.953	74.406	3.306	0	0	0	0
12400	Cbfb	1.35e-07	0	0	0	63.782	0	47.929	72.734	178.051	0	64.132	151.909	90.382	99.607	73.532	89.065	94.009	91.293	72.62	120.989	98.077	117.355	79.357	69.502	48.301	49.777	42.226	0	0	0	0	83.298	101.719	0	0	0	0	0	0	0	0	0	0	0	0
71702	Cdc5l	1.38e-07	0.482	19.246	21.476	1.166	4.532	5.748	9.359	6.739	24.792	0	0	0	0	20.249	26.189	22.572	4.926	5.529	0	24.788	25.397	16.706	47.606	39.409	13.299	21.348	23.378	31.755	15.142	52.984	8.181	10.231	229.797	252.826	261.742	25.752	257.952	32.289	26.874	213.959	17.688	276.155	260.959	280.168
12606	Cebpa	0.000179213	167.855	50.014	46.658	0	0	0	87.676	112.255	26.19	0	93.84	46.681	0	0	0	134.884	62.135	82.778	279.536	199.373	75.474	339.411	38.192	31.643	158.54	133.261	158.228	227.307	244.338	219.521	163.257	276.284	195.552	355.226	336.106	477.289	363.569	278.698	533.356	196.154	0	141.2	149.764	192.6
12608	Cebpb	1.08e-06	0	0	0	0	0	0	0	0	0	0	0	0	0	0	0	0	0	0	0	0	0	0	0	0	0	0	0	0	0	0	0	0	139.535	0	103.321	190.25	194.041	160.508	449.083	110.411	102.753	139.94	152.669	0
110794	Cebpe	0.165649	0	0	0	0	0	0	0	0	0	0	29.011	20.512	0	0	0	0	0	0	0	0	0	0	0	0	0	0	0	0	36.56	33.276	0	0	0	0	0	0	0	0	0	0	0	0	0	0
12611	Cebpg	0.0451241	0	0	0	0	0	0	0	0	0	0	0	0	0	0	0	0	0	0	0	0	0	0	0	0	32.823	65.57	0	0	0	0	0	0	0	0	0	0	0	0	0	0	0	0	0	0
12607	Cebpz	0.275964	3.2	5.828	4.921	0	6.121	3.427	4.038	16.374	4.576	0	2.204	2.742	9.753	6.276	1.699	6.539	5.145	3.648	8.082	4.188	5.88	1.481	4.87	5.314	2.536	0.861	2.625	1.123	1.744	0	9.373	45.453	0	0	0	1.381	0	2.891	6.637	1.537	1.719	2.19	1.57	1.405
320394	Cenpt	0.157753	0	0	0	0	0	0	5.506	1.874	0	0	4.406	5.502	0	0	0	0	0	0	0	0	0	0	0	0	0	0	0	0	0	0	0	0	0	0	0	0	0	0	0	0	0	0	0	0
12753	Clock	0.0298724	1.335	1.956	1.597	5.828	2.618	4.699	7.024	13.758	4.831	5.397	11.403	11.67	28.881	15.737	14.986	23.298	15.641	17.405	40.313	18.511	15.015	57.88	22.754	23.393	18.626	11.185	16.36	29.382	26.537	31.27	47.682	753.266	53.364	64.599	48.334	108.381	113.212	111.004	293.906	143.294	148.991	174.684	174.735	178.746
12912	Creb1	0.000344434	861.358	264.952	226.679	258.228	60.822	0	110.177	62.813	0	0	0	0	0	0	0	0	0	0	0	0	0	0	0	0	0	51.143	55.332	69.89	82.802	77.946	78.992	0	109.303	119.761	0	0	131.349	187.207	206.596	94.896	78.822	98.644	163.842	151.799
208677	Creb3l3	0.664275	0	0	0	0	0	0	0	0	0	0	0	0	0	0	0	0	0	0	0	7.643	7.37	0	36.209	23.868	0	0	0	0	0	0	21.615	35.269	0	0	0	0	0	0	38.057	9.81	6.293	0	0	0
229663	Csde1	0.552808	0	0	0	0	0	0	3.948	0	4.45	0	0	0	0	0	0	0	0	0	0	0	0	0	0	0	0	0	0	0	0	0	0	0	0	0	0	0	0	0	0	7.813	2.587	0	0	0
13018	Ctcf	2.56e-06	211.646	157.242	176.261	155.236	189.257	174.172	128.596	101.929	177.413	72.019	42.291	21.276	97.207	134.668	161.05	120.798	74.74	91.654	101.014	56.828	21.796	58.832	52.92	67.772	69.43	102.977	80.795	122.805	121.677	154.277	0	53.444	201.508	89.933	293.949	170.182	263.095	259.616	110.21	152.337	150.791	231.218	336.522	266.362
12387	Ctnnb1	1.36e-16	0	0	0	0	0	0	0	0	0	0	0	0	0	0	0	13.319	0	4.038	7.568	6.433	1.163	0	2.695	1.64	4.946	6.911	2.031	26.506	9.747	27.65	9.255	15.36	69.22	49.869	43.29	48.805	48.315	40.414	81.785	41.811	40.854	49.654	69.579	42.499
13047	Cux1	0.000305133	13.516	53.882	41.807	0	1.595	1.416	0	0	0	0	0	0	0	0	0	0	0	0	0	0	0	0	0	0	0	0	0	0	0	0	0	0	1.098	0.656	1.646	0	0	0	0	0	0	0	0	0
54006	Deaf1	0.00604738	0	7.241	12.175	0	0	0	0	0	0	0	0	0	0	0	0	0	0	0	0	0	0	0	0	0	0	0	0	0	0	0	0	0	0	0	0	0	0	0	0	0	0	0	0	0
13418	Dnajc1	0.160253	0	0	0	0	0	0	0	0	0	0	0	0	0	0	0	0	0	0	0	0	0	0	0	0	0	0	0	0	0	0	0	0	0	0	0	0	0	0	0	0	0	29.93	31.062	0
22791	Dnajc2	0.00318289	0	6.324	7.194	2.627	13.487	3.647	9.967	11.074	26.32	5.478	7.008	9.001	6.14	7.736	22.565	12.068	3.193	10.967	0	4.651	5.72	1.894	6.021	5.225	12.446	10.157	3.823	6.649	11.425	0	0	0	0	2.56	3.131	0	0	0	0	0	0	0	0	0
242705	E2f2	1.44e-10	54.752	75.655	70.635	80.914	124.563	146.579	124.328	164.41	128.466	180.25	236.736	185.028	143.333	221.019	224.873	272.977	175.621	175.46	183.822	101.097	86.573	99.179	78.554	66.272	77.345	47.726	66.854	53.183	46.336	46.728	57.461	49.741	0	0	0	7.882	15.431	12.598	0	0	0	0	0	0
13557	E2f3	0.00175247	61.437	76.904	71.117	41.396	80.937	71.062	51.932	85.035	47.833	49.516	86.493	55.657	46.293	70.163	52.869	92.289	58.583	60.663	80.327	69.775	62.78	44.322	49.906	40.164	43.452	19.427	43.422	95.545	112.223	92.073	104.339	99.84	46.81	78.641	42.338	39.747	43.139	34.469	58.817	19.719	23.132	15.195	16.556	18.828
104394	E2f4	0.0002115	72.448	158.673	117.239	138.063	328.521	324.848	228.006	393.121	315.728	221.38	293.129	329.152	276.888	157.364	150.513	169.798	126.641	140.714	95.618	69.268	67.877	62.946	40.828	31.477	69.611	69.99	68.774	68.153	71.485	71.627	74.203	85.554	37.189	50.354	16.379	33.723	45.146	42.53	62.61	40.766	34.328	34.959	13.656	44.984
13559	E2f5	0.000621073	25.851	22.845	0	28.376	0	74.461	31.408	24.878	0	0	0	0	0	0	0	0	0	0	0	0	0	0	0	0	0	0	0	0	0	0	0	0	0	0	0	0	0	0	0	0	0	0	0	0
50496	E2f6	5.13e-08	5.925	25.016	27.15	3.443	12.496	5.797	0	0	0	0	0	0	0	0	0	0	0	0	0	0	0	0	0	0	0	0	0	0	0	0	0	0	0	0	0	0	0	0	0	0	0	0	0	0
52679	E2f7	0.155667	0	0	0	0	0.542	0.48	0.127	0.77	0	0	0	0	0	0	0	0	0	0	0	0	0	0	0	0	0	0	0	0	0	0	0	0	0	0	0	0	0	0	0	0	0	0	0	0
108961	E2f8	0.101059	2.44	1.427	0.844	0	2.128	1.091	125.872	97.092	0	0	115.028	32.309	54.402	0.545	1.172	0	0	0	0	0	0	0	0	0	0	0	0	0	0	0	0	0	0	0	0	0	0	0	0	0	0	0	0	0
13560	E4f1	0.000692392	0	0	0	3.629	15.568	17.004	0	0	0	0	0	0	0	0	0	0	0	0	0	0	0	0	0	0	0	0	0	0	0	0	0	0	0	0	0	0	0	0	0	0	0	0	0	0
13653	Egr1	6.72e-10	0	0	0	0	0	0	0	0	0	0	0	0	0	0	0	0	0	0	0	0	0	0	0	0	8.638	7.14	8.959	9.847	11.992	12.456	11.483	0	0	1.296	9.664	0	0	0	0	0	0	0	0	0
13709	Elf1	2.13e-05	110.156	103.85	90.105	70.26	29.858	27.419	101.322	126.496	51.023	41.184	66.37	54.968	74.14	34.185	33.425	56.796	20.272	29.383	79.944	35.53	32.75	136.319	23.194	35.084	0	0	0	0	0	0	17.466	69.635	0	0	0	14.238	18.955	22.016	17.345	0	11.634	12.657	12.639	0
69257	Elf2	0.72966	64.429	73.565	63.645	75.622	18.909	59.231	84.758	142.998	37.998	34.919	100.687	38.135	84.724	64.903	66.094	43.948	76.629	46.585	50.649	66.428	56.623	64.148	72.746	63.264	41.574	60.674	54.587	85.429	16.961	42.633	88.067	69.408	107.332	104.523	103.013	96.164	92.336	88.072	155.405	20.994	22.343	23.362	28.054	27.067
56501	Elf4	0.00753892	50.657	36.335	30.126	0	0	0	29.336	31.449	0	23.878	32.184	39.698	32.547	15.17	13.99	25.884	16.022	8.519	41.674	26.147	21.055	82.688	30.811	25.286	18.401	20.375	12.658	0	0	0	30.244	51.833	17.386	17.488	15.881	0	0	0	0	0	0	0	0	0
13713	Elk3	2.28e-06	23.169	0	23.342	0	0	0	0	0	0	0	0	0	0	0	0	0	0	0	0	0	0	0	0	0	14.135	16.34	15.153	20.332	24.029	24.312	41.243	24.996	22.317	28.473	0	21.465	17.903	24.856	0	0	0	10.062	11.627	4.987
13714	Elk4	5.18e-11	0	12.746	16.591	0	0	0	0	0	0	0	0	0	0	8.238	5.403	0	11.319	8.052	0	14.413	35.332	0	0	0	25.405	26.002	21.74	0	30.793	34.878	55.503	55.846	68.379	67.744	36.674	83.712	32.948	49.356	56.405	39.047	34.171	63.068	59.067	62.335
238317	Elmsan1	4.47e-07	9.585	19.019	12.56	4.086	5.232	5.397	0	0	0	0	0	0	0	0	0	0	0	0	0	0	0	0	0	0	0	0	0	0	0	0	0	0	5.906	7.508	6.996	8.954	6.74	7.238	0	0	0	0	0	0
13875	Erf	0.129109	5.227	7.846	8.488	0	0	0	0	0	0	0	0	0	0	0	0	0	0	0	0	0	0	0	0	0	1.522	9.555	8.178	0	0	0	0	0	6.803	9.908	0	0	0	0	49.455	9.384	11.532	0	0	0
13876	Erg	0.00205744	50.08	63.405	71.982	49.202	36.147	60.869	26.244	16.445	63.774	31.774	47.204	89.009	47.988	105.679	53.522	65.808	62.336	102.888	108.503	97.852	35.081	42.007	162.712	100.574	121.654	84.45	73.855	98.824	111.956	111.789	156.647	205.382	92.766	66.206	116.665	39.779	78.915	53.457	53.579	48.799	46.141	27.364	74.76	20.651
26379	Esrra	3e-16	161.087	92.898	65.688	144.132	53.285	67.613	61.411	93.718	31.213	28.947	38.204	16.64	45.783	41.992	44.852	34.761	53.617	62.826	40.725	24.704	25.198	42.676	99.343	76.667	127.648	72.604	73.915	118.021	97.612	89.689	356.392	238.134	657.946	672.492	536.984	736.882	704.848	783.663	1286.94	665.081	618.978	551.117	695.446	575.509
26381	Esrrg	0.00113832	0	0	0	0	0	0	0	0	0	0	0	0	0	0	0	0	0	0	0	0	0	0	0	0	0	0	0	10.294	6.203	0	70.526	118.394	222.221	95.937	102.301	151.683	152.76	186.888	13.03	5.772	5.718	0	0	0
23872	Ets2	0.130448	0	0	0	0	0	0	0	0	0	0	0	0	0	0	0	0	0	0	0	15.779	13.558	0	22.967	19.136	0	0	0	0	0	0	0	0	0	0	0	0	0	0	0	0	0	0	0	0
14011	Etv6	5.1e-05	105.808	85.333	54.745	4.154	1.874	0	0	0	0	0	0	0	0	0	0	0	0	0	0	0	0	0	0	0	0	0	0	0	0	0	0	0	0	0	0	0	0	0	0	0	0	0	0	0
14247	Fli1	2.64e-08	119.255	100.995	102.033	70.006	54.933	84.473	51.207	194.013	37.944	44.577	63.975	60.379	61.318	76.265	66.142	84.143	62.602	66.119	46.083	127.595	59.979	83.086	99.189	84.294	63.49	58.309	91.881	119.322	84.231	81.598	84.528	105.966	0	13.165	34.36	0	0	0	0	0	0	0	0	0
15375	Foxa1	0.0103409	0	0	0	0	0	0	0	0	0	0	9.567	13.387	0	0	0	0	0	0	7.355	0	6.864	0	0	0	0	0	0	0	0	0	0	0	0	0	0	0	0	0	37.09	56.64	34.484	0	89.621	109.651
15227	Foxf1	0.000209137	0	0	0	4.233	0	7.859	0	0	0	0	14.659	11.777	16.695	11.15	9.509	36.909	0	16.661	0	0	0	0	0	0	23.466	26.377	21.222	0	31.889	28.249	0	24.879	0	0	0	0	0	0	0	0	0	0	0	0
60611	Foxj2	0.492257	0	0	0	0	2.282	5.31	0	0	0	0	0	0	0	0	0	0	49.44	7.27	0	0	0	0	7.552	6.591	0	0	0	0	0	0	0	0	0	0	0	0	0	0	0	0	0	0	0	0
230700	Foxj3	0.00488177	0	6.148	1.984	0	32.372	25.778	17.291	34.278	30.659	0	39.078	21.345	49.358	55.659	65.853	0	48.282	49.926	15.611	27.928	48.286	0	43.453	19.61	7.109	10.191	6.549	16.8	21.865	21.217	34.485	0	7.893	0	7.367	6.066	7.061	10.304	0	12.757	24.694	15.389	36.168	0
17425	Foxk1	4.43e-05	23.537	30.1	21.632	25.569	88.485	65.093	40.175	17.18	41.511	35.973	37.783	26.193	37.07	75.629	77.109	65.169	76.542	73.278	43.778	82.507	64.166	13.953	83.233	100.457	64.348	52.323	83.238	101.109	89.69	134.217	56.038	206.809	90.603	123.252	116.54	190.687	194.657	120.805	107.637	128.117	151.548	69.081	70.446	101.923
68837	Foxk2	0.218433	14.528	41.294	29.857	25.905	47.61	67.017	40.29	43.938	54.774	31.229	36.511	20.006	34.625	50.038	52.99	51.078	47.116	37.566	0	48.907	21.385	0	44.568	52.86	17.518	19.649	15.291	28.448	56.263	58.259	9.724	9.585	23.227	29.349	31.794	47.091	46.98	0	0	46.223	54.077	0	0	0
56458	Foxo1	0.0395295	0	0	0	0	136.898	196.826	170.414	10.909	0	5.823	11.271	10.469	14.748	303.549	313.889	14.938	305.201	392.649	25.518	19.594	0	10.141	378.235	360.221	0	0	0	0	0	0	423.251	25.054	632.053	3481.77	560.977	403.903	3072.93	450.663	86.421	35.385	595.299	0	0	0
56484	Foxo3	2.4e-06	5.795	1.591	0	11.746	31.528	54.344	24.133	41.125	36.163	19.267	71.479	73.324	71.402	71.781	62.336	39.246	48.16	32.565	23.389	11.525	37.43	0	11.903	14.165	0	0	0	0	0	0	0	0	0	0	0	0	0	0	0	0	0	0	0	0
54601	Foxo4	0.132289	0	0	0	0	0	0	7.155	17.809	5.725	4.775	8.714	0	14.716	3.849	5.176	0	0	0	15.66	2.779	0	0	0	0	0	0	0	0	0	0	7.24	4.342	0	0	0	0	0	0	15.833	6.476	0	0	0	0
108655	Foxp1	0.000336877	31.01	56.994	37.474	30.482	46.321	59.596	30.461	29.94	45.325	30.128	0	10.341	61.59	44.937	42.969	56.153	31.057	67.364	66.761	46.348	22.482	16.066	48.143	44.661	32.849	35.244	41.228	43.316	43.145	43.767	38.785	97.618	84.04	56.243	91.965	93.923	73.361	93.377	199.058	96.11	84.319	42.697	60.117	57.597
74123	Foxp4	0.02197	1.777	5.083	5.017	1.761	5.18	6.316	4.662	5.325	1.995	2.307	2.985	4.68	10.543	0	3.6	0	0	0	0	3.16	1.635	0	0	0	3.406	2.622	2.57	0	0	0	8.185	57.124	7.396	8.864	8.065	14.149	12.091	10.548	48.1	12.346	22	11.029	12.382	11.15
14390	Gabpa	0.000242408	352.361	559.685	499.05	402.32	427.337	448.561	351.966	436.732	235.412	200.351	71.425	184.937	253.677	318.614	286.195	243.853	222.005	246.784	160.248	234.699	214.985	149.284	290.753	268.238	120.016	123.196	127.963	198.369	148.154	177.047	503.381	294.453	178.806	291.27	288.719	284.872	262.565	287.773	471.491	175.119	154.904	179.832	164.317	151.145
14391	Gabpb1	0.103392	89.896	204.414	186.282	109.996	177.733	193.146	119.864	119.105	174.506	113.889	122.859	112.21	111.714	457.757	278.583	103.602	309.812	370.809	68.007	615.409	514.812	112.61	548.727	336.747	208.781	263.995	234.995	194.59	293.017	186.494	334.702	99.032	161.649	0	85.035	182.153	81.108	194.158	354.288	154.305	151.386	65.355	124.744	46.596
213054	Gabpb2	0.025613	86.423	198.697	152.69	151.12	230.14	218.365	220.856	210.865	365.813	177.691	229.281	213.33	189.917	459.915	441.373	180.672	210.814	307.41	98.712	476.699	290.685	111.876	314.368	313.286	398.938	206.234	229.821	211.272	211.883	285.062	478.111	194.602	257.819	264.332	241.577	183.864	184.428	137.73	149.413	178.528	153.019	140.389	169.729	53.801
14463	Gata4	3.25e-05	87.841	176.138	150.859	33.608	55.706	64.245	0	0	0	0	0	0	0	0	0	0	0	0	0	0	0	0	0	0	78.75	67.898	63.118	105.183	116.621	112.243	148.102	147.475	167.189	217.016	179.403	193.449	112.253	198.082	352.487	124.807	0	0	0	0
14465	Gata6	4.42e-05	35.182	87.466	74.359	33.144	54.818	57.887	43.472	0	38.438	0	0	0	0	0	0	31.429	28.051	30.233	0	0	0	25.582	40.644	32.829	41.865	37.304	38.329	0	0	0	0	0	0	0	0	0	0	0	40.567	0	35.741	0	0	0
67210	Gatad1	0.00491771	0	4.064	2.776	0	0	0	0	0	0	0	0	0	0	0	0	0	0	0	0	0	0	0	0	0	0	0	0	0	0	0	0	0	0	0	0	0	0	0	0	0	0	0	0	0
229542	Gatad2b	1.87e-05	9.198	26.743	22.146	2.504	6.098	6.936	0	0	0	0	0	0	0	0	0	0	0	0	0	0	0	0	0	0	0	0	0	0	0	0	0	7.863	8.546	8.043	14.655	6.871	10.615	19.991	11.53	4.374	3.798	0	0	0
14582	Gfi1b	0.0747844	18.195	91.616	58.361	22.315	27.357	20.926	0	88.689	3.341	0	0	0	30.656	131.2	154.411	0	6.761	174.86	0	0	0	0	0	0	0	0	0	0	0	0	0	0	0	0	0	0	0	0	0	0	0	0	0	0
56809	Gmeb1	0.00925335	0	0	0	3.125	7.454	6.853	0	0	0	0	0	0	0	0	0	0	4.623	5.658	0	0	0	0	0	0	0	0	0	0	0	0	0	0	0	0	0	0	0	0	0	0	0	0	0	0
229004	Gmeb2	0.00820115	0	0	0	4.295	0	8.75	0	0	0	0	0	0	0	0	0	0	0	0	0	0	0	0	0	0	0	0	0	0	0	0	0	0	0	0	0	0	0	0	0	0	0	0	0	0
76022	Gon4l	0.500597	0	0	0	0	0	0	0	0	0	0.816	0	0.341	0	0	0	0	0	0	0	0	0	0	0	0	0	0	0	0	0	0	0	0	0	0	0	0	0	0	0	0	0	0	0	0
14886	Gtf2i	2.49e-06	139.599	197.196	194.093	81.722	87.838	109.132	72.41	68.548	78.271	17.795	25.399	32.329	52.706	82.975	87.218	12.47	72.52	67.784	8.006	43.028	82.773	20.627	33.124	76.49	69.037	71.266	27.7	52.861	60.273	57.372	34.596	39.516	43.793	53.857	63.337	46.516	92.971	48.794	27.826	19.357	11.559	4.597	0	12.79
15111	Hand2	5.41e-05	7.277	10.387	9.259	0	0	0	0	0	0	0	0	0	0	0	0	0	0	0	0	0	0	0	0	0	0	0	0	0	0	0	0	0	0	0	0	0	0	0	0	0	0	0	0	0
73389	Hbp1	0.0778816	0	0	0	0	0	0	0	0	0	0	0	0	0	0	0	0	9.866	14.782	0	10.795	9.132	0	18.472	14.231	0	0	0	0	0	0	0	11.78	0	0	0	0	0	0	0	0	0	0	0	0
15205	Hes1	0.306272	0	0	0	0	0	0	0	0	0	0	0	0	0	0	0	0	0	0	0	0	0	0	34.669	22.247	0	0	0	0	0	0	11.282	65.002	0	0	0	0	0	0	0	0	0	0	0	0
15242	Hhex	6.94e-08	0	0	0	0	0	0	0	0	0	0	0	0	0	0	0	0	0	0	0	0	0	0	0	0	0	0	0	0	0	0	42.047	0	127.923	0	139.835	156.938	54.291	157.93	0	212.584	228.724	270.79	320.243	353.04
15248	Hic1	0.00110556	0.908	1.348	0	0	0	0	0	0	0	0	0	0	0	0	0	0	0	0	0	0	0	0	0	0	0	0	0	0	0	0	0	0	15.015	22.358	17.998	8.283	9.997	7.32	0	0	0	0	0	0
58180	Hic2	8.82e-05	30.475	48.816	30.69	0	0	0	0	0	0	0	0	0	0	0	0	0	0	0	0	0	0	0	0	0	0	0	0	0	0	0	0	0	0	0	0	0	0	0	0	0	0	0	0	0
15251	Hif1a	2.15e-05	0	3.547	1.674	1.916	5.018	5.368	0	3.061	0.937	0	0	0	0	3.374	1.103	0	1.986	1.003	0	0	0	0	0	0	0	0	0	0	0	0	0	0	0	0	0	0	0	0	0	0	0	0	0	0
53417	Hif3a	3.62e-05	0	0	0	0	0	0	5.22	8.786	0	32.501	27.317	44.454	38.981	48.903	37.416	42.892	27.186	35.651	26.162	9.823	0	0	0	0	0	0	0	0	0	0	0	0	0	0	0	0	0	0	0	0	0	0	0	0
219150	Hmbox1	2.98e-06	12.259	33.255	31.971	3.468	7.86	10.72	0	0	0	0	0	0	0	0	0	0	0	0	0	0	0	0	0	0	12.539	12.257	10.128	23.599	32.698	19.559	15.186	20.464	51.417	49.765	44.756	58.204	44.72	50.148	46.233	22.036	20.522	0	0	0
66867	Hmg20a	0.000278236	127.124	53.385	67.423	64.057	156.607	26.716	12.569	13.766	0	0	0	0	0	90.279	7.726	0	0	0	0	8.275	12.271	0	9.444	10.204	82.58	122.794	138.189	165.993	143.259	178.554	217.085	199.314	395.298	169.376	388.273	96.174	149.099	77.194	73.75	0	18.926	24.134	34.636	34.009
15353	Hmg20b	0.00354269	8.24	37.097	33.975	17.026	38.629	52.61	16.915	23.163	33.397	6.254	4.466	88.223	16.068	8.769	14.391	21.984	9.982	17.578	19.001	33.233	32.565	15.342	29.335	15.766	44.745	39.584	34.381	45.41	50.097	63.816	79.708	49.876	12.428	24.354	36.001	34.525	49.494	44.37	21.572	19.632	15.448	0	28.966	21.575
15361	Hmga1	0.00021431	16728.4	18796	20799.7	19624.5	20083.4	0	15265.6	18620.5	11117.7	13889.7	15253.9	10997.3	0	0	0	0	0	0	0	0	0	0	0	0	0	0	0	0	0	0	0	0	0	0	0	0	0	0	0	0	0	9096.5	9190.31	13914.5
15364	Hmga2	2.82e-05	18807.4	7825	8455.54	5665.05	1606.62	2467.45	4304.18	2474.65	911.204	1693.84	1683.28	1327.36	877.645	1078.32	805.121	2073.45	964.666	1185.13	5877.67	1674.74	1671.66	5171.1	3024.95	1162.61	913.914	1209.39	1152.22	1183.26	1160.15	1188.01	2340.27	1233.72	646.42	677.124	637.36	540.965	498.518	473.939	636.861	272.626	256.765	235.72	216.698	252.856
97165	Hmgb2	5.38e-14	18750.8	16400.3	17227.6	31365.9	27791.4	28730.4	38209.7	34003	36167.2	55099.3	49210.1	57169.6	53781.6	40771.7	41179.5	45160.8	38517.6	35131.7	37421.9	31305.1	34225.8	34566.1	27686.8	32639.4	29805.4	29099	25346.1	20670	20508.6	22734.6	15083	22283.1	9673.49	9142.64	10824.8	7006.17	7495.7	7609.63	4369.18	3432.25	3134.59	5119.57	2161.27	2415.33
15354	Hmgb3	3.08e-11	7431.66	12248.8	12975	11481.8	13824.6	10759.5	14773.9	12319.7	17963.9	13058.1	14700	14294.6	10955.7	12070.1	15406.3	11770.8	13477.6	15616	7434.35	8765.84	6925.74	5219.73	4603.36	7692.86	3968.95	5415.59	5181.46	2402.64	2397.43	2781.43	2506.35	3836.33	1680.76	1837.42	2195.82	2046.58	2079.15	1770.23	1438.64	1242.36	1314.96	1156.89	1496.93	1411.9
21405	Hnf1a	6.8e-14	29.968	31.584	83.951	38.402	106.189	145.195	53.962	24.912	132.599	0	0	0	5.252	1.944	1.212	30.365	7.65	7.016	17.74	84.501	66.314	27.212	25.87	25.891	245.932	246.843	227.08	258.652	339.241	69.143	338.301	365.942	248.382	500.445	506.365	608.4	684.083	718.787	1006.58	463.076	436.303	576.3	856.359	752.453
21410	Hnf1b	8.37e-07	12.437	8.746	11.16	13.342	5.318	5.658	0	0	0	0	0	0	2.093	1.839	0	2.376	2.719	0	0	0	0	0	0	0	9.598	13.954	11.172	25.939	25.154	22.842	66.412	59.204	41.571	37.104	43.087	50.578	53.251	48.682	104.089	25.484	25.807	31.163	28.474	0
15378	Hnf4a	5.42e-11	351.088	296.498	256.267	491.878	193.102	305.546	275.952	355.699	292.374	142.509	300.041	192.325	653.243	428.846	373.239	246.658	337.812	460.983	183.745	315.507	316.899	308.901	329.81	278.33	379.76	249.904	234.626	198.34	402.757	243.02	1664.51	991.051	1010.83	944.219	909.969	2797.79	2930.33	2809.74	3511.91	3286.94	3009.69	2372.23	2756.99	2030.18
30942	Hnf4g	0.0423243	36.41	18.035	19.479	0	0	0	25.882	36.515	0	0	0	0	0	0	0	0	0	0	0	0	0	0	0	0	0	0	0	0	0	0	0	0	0	0	0	0	0	0	0	0	0	0	0	0
15402	Hoxa5	0.000116913	65.304	38.79	37.098	0	0	0	0	0	0	0	0	0	0	0	0	0	0	0	0	0	0	0	0	0	0	0	0	0	0	0	0	0	0	0	0	0	0	0	0	0	0	0	0	0
15412	Hoxb4	8.44e-05	24.905	17.54	10.165	0	116.62	126.725	0	0	0	0	0	0	0	0	0	0	0	0	0	0	0	0	0	0	0	0	0	0	0	0	0	0	0	0	0	0	0	0	0	0	0	0	0	0
15499	Hsf1	0.109	0	0	0	0	1.419	28.735	0	0	0	0	0	0	0	0	0	0	0	0	0	0	0	0	0	0	0	0	0	0	0	0	0	0	0	0	0	0	0	0	13.62	0	3.613	0	11.46	13.729
22778	Ikzf1	3.78e-10	43.586	44.017	43.186	9.092	28.42	30.863	13.584	7.747	19.612	0	0	0	9.76	13.193	0	0	0	0	0	0	0	4.732	0	7.831	13.486	10.719	12.668	0	13.776	10.902	0	0	0	0	0	0	0	0	0	0	0	0	0	0
22779	Ikzf2	0.00385279	3.576	0	3.344	0	0	0	0	0	0	0	0	0	0	0	0	0	0	0	0	0	0	0	0	0	0	0	0	0	0	0	0	0	0	0	0	0	0	0	0	0	0	0	0	0
22780	Ikzf3	0.183261	0	0	0	0	0	0	0	0	0	0	0	0	0	0	0	0	0	0	0	0	0	4.663	8.221	6.895	5.978	4.059	4.791	0	0	0	0	0	0	0	0	0	0	0	0	0	0	0	0	0
16363	Irf2	0.00935321	561.594	308.799	324.026	107.822	188.622	164.691	174.294	191.573	279.654	71.075	179.234	117.184	157.775	239.483	216.423	118.996	178.984	239.051	211.956	150.574	106.299	125.781	107.136	77.212	87.486	48.286	60.886	104.361	69.836	172.575	218.931	50.329	117.585	0	150.501	0	136.15	190.121	317.909	117.343	99.118	227.601	220.698	156.941
54131	Irf3	9.23e-07	11.35	38.807	39.798	13.401	57.974	68.279	34.325	22.686	72.651	43.552	36.543	21.671	26.004	86.163	78.103	55.475	112.319	114.205	59.068	171.228	175.557	35.795	55.829	75.785	75.431	86.789	77.708	115.968	103.408	133.047	76.357	47.407	151.799	125.088	187.38	135.538	215.217	185.171	284.456	578.273	495.662	374.382	652.639	554.241
27056	Irf5	0.41663	0	0	0	0	0	0	0	0	0	0	0	0	0	0	0	0	0	0	0	0	0	0	0	0	0	0	0	0	0	0	0	0	0	0	0	0	0	0	23.535	1.676	0	0	0	0
16478	Jund	0.00942519	21.252	9.614	0	0	0	0	0	0	0	0	0	0	0	0	0	0	0	0	0	0	0	0	0	0	0	0	0	0	0	0	0	0	0	0	0	0	0	0	0	0	0	0	0	0
16549	Khsrp	2.01e-08	0	0	0	0	26.889	23.141	0	24.261	10.197	0	0	0	6.432	2.585	4.952	8.448	35.992	33.616	0	0	0	5.093	2.733	1.631	6.141	5.667	3.727	9.408	10.311	9.747	9.874	35.521	42.788	35.949	30.523	27.727	27.455	49.86	58.35	76.96	64.829	42.36	43.054	43.571
16597	Klf12	2.14e-08	4.758	31.96	26.887	0	0	0	0	0	0	0	0	0	0	0	0	0	0	0	0	0	0	0	0	0	0	0	0	0	0	0	0	3.14	71.011	72.933	73.956	61.741	64.88	58.118	17.873	20.315	0	32.706	20.771	31.345
50794	Klf13	0.0868985	39.713	56.555	36.221	67.836	72.234	75.964	50.371	41.158	35.355	0	0	0	31.338	46.905	42.103	34.202	20.585	2.231	58.491	0	33.155	41.608	77.531	68.203	51.412	28.998	30.714	22.137	51.726	29.518	14.047	49.274	54.77	46.801	49.373	42.121	69.626	42.432	13.307	20.266	11.501	0	0	0
16599	Klf3	0.37501	6.441	37.911	33.305	0	29.796	91.383	27.981	91.748	69.134	0	0	0	0	0	0	64.21	26.319	24.41	38.46	25.453	0	0	0	0	49.202	0	59.378	0	0	0	0	0	0	0	0	80.905	75.349	93.304	0	27.934	13.253	36.112	23.834	78.345
16601	Klf9	0.183372	0	0	0	0	0	0	0	0	0	0	0	0	0	0	0	0	0	0	0	0	0	0	0	0	0	0	0	0	0	0	0	0	0	0	0	11.269	19.018	0	0	0	0	0	0	0
231051	Kmt2c	0.0102029	0.14	1.375	0.936	0	0	0	0	0	0	0	0	0	0	0	0	0	0	0	0	0	0	0	0	0	0	0	0	0	0	0	0	0	0	0	0	0.735	0	0.303	0	0	0	0	0	0
237339	L3mbtl3	1.23e-06	40.875	44.192	34.412	5.001	3.967	3.087	0	0	0	0	0	0	0	0	0	0	0	0	0	0	0	0	0	0	0	0	0	0	0	0	0	0	0	0	0	0	0	0	0	0	0	0	0	0
212391	Lcor	0.0852529	0	0	0	0	2.057	5.897	3.516	2.055	2.482	1.243	0	2.562	0	0	0	0	0	0	8.656	13.974	8.187	0	0	0	0	0	0	2.901	7.32	0	9.976	23.387	0	0	0	0	0	0	0	0	0	0	0	0
16842	Lef1	0.0347368	0	0	0	0	0	0	0	0	0	0	0	0	0	0	0	20.661	0	10.232	20.52	75.487	59.926	6.988	79.512	71.293	0	0	0	0	0	0	0	0	0	0	0	0	0	0	0	0	0	0	0	0
16870	Lhx2	0.000136126	11.349	15.578	7.292	0	0	0	0	0	0	0	0	0	0	0	0	0	0	0	0	0	0	0	0	0	0	0	0	0	0	0	0	0	0	0	0	0	0	0	0	0	0	0	0	0
16978	Lrrfip1	6.74e-10	0	0	0	0	0	0	0	0	0	0	0	0	0	1.897	0.354	1.188	1.839	2.19	1.787	2.472	1.789	0	0	0	1.699	0	2.044	0	2.383	2.576	0	3.126	3.56	4.53	4.01	6.203	5.37	6.78	0	6.788	6.11	5.385	7.154	7.662
71268	Lrrfip2	0.000772762	0	24.598	8.055	0	210.462	283.599	216.612	47.554	232.857	1.434	3.542	1.874	16.318	303.718	273.897	3.979	441.706	435.783	4.116	295.486	3.443	0	248.18	237.018	62.127	43.056	55.705	646.216	799.269	61.746	15.323	38.812	170.492	116.604	1150.4	284.44	252.614	278.14	503.532	213.09	1253.36	1253.51	1344.7	1262.8
17002	Ltf	0.0348592	0	0	0	0	0	0	0	0	0	2.154	4.464	3.152	2.403	14.536	76.985	20.7	86.192	83.517	54.861	237.304	232.464	2.965	54.34	84.592	18.932	15.294	12.777	96.803	12.964	25.867	33.113	3.844	0	0	0	0	0	0	0	0	0	0	0	0
17089	Lyar	0.181242	4.518	52.338	49.547	10.391	46.572	42.681	7.821	25.051	73.207	60.238	22.031	34.259	16.013	241.058	135.197	54.756	35.99	120.222	55.323	223.292	216.339	0	195.761	171.953	147.861	141.271	148.68	240.45	131.711	157.478	0	11.656	138.704	47.578	124.561	42.655	58.218	67.559	6.043	129.916	13.162	97.03	172.76	175.352
17095	Lyl1	0.00605763	17.399	15.969	0	12.665	0	89.978	0	0	0	14.828	0	3.672	8.457	13.076	11.145	0	0	0	0	0	0	0	0	0	0	0	0	0	0	0	0	0	0	0	0	0	0	0	0	0	0	0	0	0
17133	Maff	0.00093564	73.603	105.161	92.491	0	0	0	46.756	142.96	0	30.543	0	85.619	0	48.217	34.587	100.223	79.325	77.217	104.658	64.208	70.442	0	0	0	0	0	0	0	0	0	0	0	0	0	0	0	0	0	0	0	0	0	0	0
17134	Mafg	6.69e-10	302.033	170.121	174.368	137.724	52.145	84.862	125.819	160.642	35.699	64.214	125.798	96.56	86.54	108.127	127.806	78.741	81.695	119.256	86.157	278.089	247.356	131.544	199.6	168.011	232.206	217.926	210.991	282.49	305.531	294.717	192.109	146.481	463.181	426.337	418.97	512.916	401.176	446.232	243.868	342.886	341.816	275.332	359.983	314.677
17135	Mafk	7.48e-05	434.017	212.324	191.459	283.976	78.876	84.677	81.87	147.294	67.972	92.325	59.565	115.523	0	60.361	50.751	72.384	55.296	58.16	81.021	124.858	102.612	68.736	75.647	68.057	102.926	97.044	74.865	77.867	81.436	90.688	25.867	44.82	82.177	88.017	41.555	117.626	116.172	114.784	68.862	75.935	128.573	87.248	87.906	80.831
17187	Max	2.56e-06	881.705	1375.69	1226.51	1039.81	1112.59	1336.66	876.614	455.381	979.136	621.08	354.473	395.853	392.793	963.498	898.54	805.458	591.041	762.24	646.976	787.447	795.659	498.341	579.802	619.524	915.016	710.986	714.27	845.588	936.499	935.862	1065.42	735.681	716.085	728.74	661.54	833.96	666.66	775.419	296.105	545.509	609.378	530	655.733	624.678
17188	Maz	0.00362658	73.762	272.732	166.673	51.631	154.548	258.755	62.736	39.217	116.543	54.355	15.115	20.351	46.796	181.509	174.826	74.353	74.77	105.424	70.265	50.735	0	16.023	74.005	66.259	106.045	50.056	65.575	50.904	49.141	105.315	85.165	88.561	77.485	99.685	90.246	90.149	79.054	99.441	45.08	123.868	68.389	0	48.67	44.813
17190	Mbd1	2.2e-07	26.828	22.035	17.521	12.846	7.65	9.92	6.872	40.271	0	0	0	0	0	0	0	0	0	0	4.056	0	7.23	0	0	0	19.772	0	12.77	22.122	26.058	16.62	12.562	0	74.847	63.167	40.807	59.107	52.032	38.16	65.41	50.365	51.857	14.192	0	17.899
17191	Mbd2	0.241783	5.621	17.949	19.688	0	8.791	16.645	5.363	13.82	12.082	27.339	25.78	31.058	29.362	23.262	24.612	24.29	22.717	24.682	56.509	0	12.693	22.718	9.257	11.292	19.803	0	8.953	15.372	14.33	0	10.336	44.614	17.355	27.394	18.956	21.937	32.208	20.165	105.077	25.976	32.966	0	14.406	11.035
17192	Mbd3	0.00117599	5.068	205.98	29.418	0	142.146	2.367	0	0	0	0	0	0	0	0	0	0	0	0	0	0	0	0	0	0	0	0	0	0	0	0	0.997	2.938	6.219	5.934	0	8.269	9.695	7.94	0	0	0	0	0	0
17257	Mecp2	1.36e-19	318.526	346.457	349.32	138.57	192.699	204.278	159.305	189.964	137.249	124.558	168	108.181	98.255	263.888	139.5	243.675	208.453	242.91	350.351	475.825	385.23	422.553	695.554	659.252	930.391	794.036	627.46	993.005	1247.08	1077.17	1128.45	866.377	1965.48	2259.96	2208.02	2009.18	2353.2	2069.67	3102.12	1778.67	1614.95	1839.36	2146.19	1853.82
17258	Mef2a	0.123293	0	0	0	0	24.215	19.047	0	0	0	0	0	0	0	0	0	0	0	0	0	0	0	0	0	0	0	33.761	35.093	0	0	0	0	20.627	0	0	0	0	0	0	0	31.082	43.672	0	0	0
17260	Mef2c	0.445238	0	0	0	0	0	0	0	0	0	26.627	61.335	0	0	0	0	109.103	124.25	0	0	221.782	232.97	0	0	0	213.156	196.409	0	0	0	0	0	0	0	63.981	35.064	49.331	48.539	73.778	0	0	0	0	0	0
17261	Mef2d	0.037996	4.086	18.137	13.804	18.052	34.057	32.847	17.341	11.484	12.555	0	0	0	22.847	36.054	35.413	32.317	35.901	39.769	27.395	42.938	39.006	18.981	47.552	40.807	45.373	43.465	0	53.766	48.011	0	0	43.604	0	42.241	47.61	38.427	43.696	39.687	30.708	41.901	55.326	59.966	61.365	58.089
17268	Meis1	4.74e-12	58.122	62.348	40.84	17.177	27.635	23.606	11.307	7.726	0	0	0	0	3.592	0	9.547	0	5.439	5.632	0	0	0	0	0	0	0	0	0	0	0	0	0	0	0	0	0	0	0	0	0	0	0	0	0	0
17536	Meis2	1.27e-09	33.502	15.974	25.077	5.061	8.121	10.524	0	0	0	0	0	0	0	0	0	0	0	0	0	0	0	0	0	0	0	0	0	0	0	0	0	0	0	0	0	0	0	0	0	0	0	0	0	0
29808	Mga	0.0353608	29.514	22.236	18.797	8.401	399.715	5.236	6.021	6.651	2.387	2.138	5.033	3.392	3.619	5.014	4.761	0	3.377	4.187	1.702	4.446	3.136	3.358	2.674	2.051	4.801	2.843	0	2.749	2.004	2.906	3.773	4.914	1.421	0.889	1.64	2.481	1.977	2.569	4.401	1.267	0.864	0	0	0
21428	Mlx	8.41e-12	17.232	87.043	51.924	49.607	155.258	138.931	111.991	109.549	145.986	132.009	129.986	108.454	106.535	198.111	226.212	267.872	218.152	225.893	165.773	261.993	257.009	226.671	206.303	207.731	352.466	403.49	389.535	531.011	416.445	614.942	450.746	333.962	1136.46	817.979	909.015	1777.8	1640.18	1557.16	1663.78	1927.39	1951.97	3260.56	2893.09	2942.82
58805	Mlxipl	6.77e-11	2.495	17.207	11.604	10.084	23.079	29.996	13.899	28.11	15.922	13.224	25.001	21.81	23.896	30.275	28.995	32.114	36.71	31.6	20.885	45.66	26.474	30.83	32.328	23.11	60.148	63.468	58.241	70.964	87.22	99.826	131.632	79.774	153.608	170.628	138.092	389.461	327.845	344.135	662.78	543.327	409.395	590.742	671.664	613.879
17428	Mnt	0.0313934	21.102	109.051	88.186	65.78	96.086	87.115	69.25	95.695	32.573	81.182	51.433	71.803	91.581	35.13	40.365	87.473	13.564	19.165	55.544	31.087	29.584	32.923	57.734	26.916	37.799	8.763	52.465	76.069	43.727	51.899	78.359	122.855	4.074	20.352	26.123	46.445	24.938	44.743	75.455	53.896	34.105	61.921	0	23.89
116870	Mta1	0.00699765	5.753	11.238	17.712	5.697	2.556	3.18	3.429	2.489	0	1.493	0	2.188	0	0	0	0	0	0	12.959	2.028	0	0	0	0	0	0	0	0	4.091	4.083	0	0	5.848	6.182	0	2.503	13.419	11.463	14.574	2.521	3.386	0	0	0
23942	Mta2	0.000477311	13.294	39.187	32.41	5.428	22.245	22.998	8.111	18.866	7.764	10.477	11.101	19.249	22.386	9.181	6.504	29.923	9.662	12.529	30.919	9.983	20.623	9.055	13.157	9.246	27.429	12.823	13.607	20.78	14.009	28.306	16.982	35.302	18.245	30.546	37.366	33.015	54.54	48.533	46.433	30.175	42.884	16.047	20.282	18.178
116871	Mta3	0.028778	0	11.75	10.505	1.988	6.54	0	0	0	0	0	0	0	0	0	0	0	0	0	0	0	0	0	0	0	0	0	0	0	0	0	5.449	12.412	8.214	8.876	0	9.22	13.021	0	0	0	0	0	0	0
17119	Mxd1	0.037328	41.533	44.88	47.478	0	0	0	57.705	65.999	14.62	20.188	85.38	85.208	0	22.57	18.404	0	0	0	0	0	0	0	0	0	0	0	0	0	0	0	0	0	0	0	0	0	0	0	0	0	0	0	0	0
17121	Mxd3	0.0159373	0	0	0	0	0	0	5.117	6.595	0	3.87	6.465	3.145	2.86	0	7.654	0	0	0	0	0	0	0	0	0	0	0	0	0	0	0	0	0	0	0	0	0	0	0	0	0	0	0	0	0
17122	Mxd4	0.0740205	0	0	0	0	0	0	0	0	0	0	0	0	0	0	0	0	0	0	0	0	0	0	0	0	0	0	0	0	0	0	0	0	0	0	0	0	0	0	49.316	19.427	29.089	0	0	0
17859	Mxi1	0.000218978	21.877	19.479	11.325	0	24.707	7.454	8.391	34.324	26.344	0	32.976	39.586	43.423	33.512	44.653	0	36.967	38.723	0	0	0	0	17.248	10.111	0	0	0	0	0	0	0	0	0	0	0	0	0	0	0	0	0	0	0	0
17863	Myb	4.82e-07	0	0	0	3.119	8.021	7.87	4.406	13.458	10.397	11.557	13.432	10.122	5.692	21.879	12.607	4.118	7.228	15.116	0	17.23	13.127	0	10.702	4.428	0	0	0	0	0	0	0	0	0	0	0	0	0	0	0	0	0	0	0	0
17865	Mybl2	0.424723	0	0	0	0	0	0	0	0	0	0.139	2.264	3.315	0	0	0	0	0	0	0	0	0	0	0	0	0	0	0	0	0	0	0	0	0	0	0	0	0	0	0	0	0	0	0	0
17869	Myc	3.15e-09	26.726	20.915	23.713	0	5.138	16.032	0	0	0	0	0	0	0	0	0	0	0	0	0	0	0	0	0	0	0	0	0	0	0	0	0	0	0	0	0	0	0	0	0	0	0	0	0	0
18109	Mycn	0.00493546	0	8.161	11.939	0	0	0	0	0	0	0	0	0	0	0	0	0	0	0	0	0	0	0	0	0	0	0	0	0	0	0	0	0	0	0	0	0	0	0	0	0	0	0	0	0
17876	Myef2	5.73e-12	57.314	112.259	93.092	3.41	10.967	7.875	0	0	0	0	0	0	0	0	0	0	0	0	0	0	0	0	0	0	4.825	0	50.31	4.266	0	17.415	6.809	11.247	200.343	275.354	225.411	394.268	268.063	306.093	587.965	135.4	120.258	272.927	259.027	303.193
20185	Ncor1	0.20931	0	0	0	0	0	0	0	0	0	0	0	0	0	0	0	0	0	0	0	0	0	0	0	0	0	0	0	0	0	0	0	0	0	0	0	0	0	0	4.902	0	2.266	0	0	0
20602	Ncor2	0.445273	0	0	0	0	0	0	0	0	0	0	0	0	0	0	0	0	0	0	0	0	0	0	0	0	0	0	0	0	0	0	0	0	0	0	0	0	1.418	42.559	0	0	0	0	0	0
54446	Nfat5	3.14e-07	0	0	0	2.257	4.31	11.572	3.256	0	12.649	3.005	0	6.527	6.961	7.14	7.434	0	6.71	5.218	4.052	8.276	7.826	2.099	7.1	6.54	6.164	5.809	5.039	21.069	8.454	25.068	33.075	8.343	32.113	21.834	28.263	14.771	21.937	12.675	33.502	22.303	13.813	14.185	17.786	27.941
18018	Nfatc1	0.000570701	6.57	17.196	16.927	7.894	5.481	2.738	8.724	12.444	6.415	10.762	10.219	16.422	15.307	9.605	9.101	26.363	12.515	15.377	34.315	19.138	20.744	38.576	43.269	28.696	29.957	17.499	15.827	43.089	63.937	39.417	109.767	83.301	27.1	35.55	38.002	48.768	28.999	41.398	162.675	50.594	56.738	48.515	50.26	49.334
18019	Nfatc2	0.000353153	0	0	0	0	0	0	0	0	0	0	0	0	0	0	0	0	0	0	0	0	0	0	0	0	7.229	5.029	0	0	0	0	14.09	11.453	0	0	0	0	0	0	0	0	0	0	0	0
18021	Nfatc3	0.514172	7.74	21.155	21.388	18.729	25.381	27.024	24.595	16.318	18.503	22.06	19.375	20.274	21.495	21.63	14.672	47.609	46.671	13.519	44.222	57.559	17.803	30.266	84.674	64.621	28.209	26.524	10.358	21.505	19.553	24.293	60.669	32.679	16.106	18.683	15.577	16.117	22.702	33.276	71.276	49.642	38.685	27.363	25.238	27.15
73181	Nfatc4	0.00711238	1.539	2.648	2.453	0	0	0	0	0	0	0	0	0	0	8.105	6.07	4.196	8.519	4.827	4.986	8.424	3.759	13.575	5.239	3.607	0	0	0	3.308	4.566	0	6.284	2.716	0	0	0	0	0	0	0	0	0	0	0	0
18022	Nfe2	2.67e-08	222.979	129.532	121.589	93.573	64.942	62.576	75.471	116.65	56.907	47.256	77.462	86.546	51.816	32.805	24.952	56.866	22.875	0	61.527	53.887	47.553	19.979	0	18.075	15.208	19.257	20.5	17.789	0	7.975	0	0	0	0	0	0	0	0	0	0	0	0	0	0
18024	Nfe2l2	0.045131	7.249	1.088	0	0	0	0	0	0	0	0	0	0	0	0	0	0	0	0	0	0	0	0	0	0	0	0	0	0	0	0	0	0	0	0	0	0	0	0	0	0	0	0	0	0
18027	Nfia	3.75e-22	224.503	232.568	292.374	138.687	122.848	123.832	111.407	119.65	99.183	67.861	198.949	192.496	276.244	260.778	284.312	686.797	351.324	357.417	732.171	522.105	435.974	1097.03	929.36	839.295	1139.15	1166.37	1026.62	1316.87	1183.91	1616.9	2842.32	1801.13	4294.25	3673.36	4175.84	4141.61	3903.29	4944.09	3866.78	4142.6	4251.62	5454.3	5083.36	3689.73
18028	Nfib	8.63e-19	363.841	363.581	310.569	181.343	176.421	195.873	131.84	219.467	204.445	108.457	247.352	249.969	357.901	376.467	406.863	737.294	477.448	415.06	761.494	706.03	639.657	1390.71	1102.66	997.873	1298.51	1363.22	1127.06	1701.2	1556.07	1783.26	3960.37	2166.61	3920.42	3827.77	3816.57	3875.6	3249.37	4156.74	3359.47	3753.11	3559.1	4604.41	4233.3	3642.63
18029	Nfic	3.18e-20	253.529	165.95	172.328	176.877	97.071	139.45	88.358	126.21	76.886	35.617	140.168	136.639	210.498	175.558	207.755	418.194	228.255	259.388	432.445	305.232	311.806	678.874	557.806	583.291	1031.32	914.844	772.944	716.521	1203.51	1194.67	3136.05	2162.34	3821.79	4039.84	4062.25	5063.78	2953.58	3569.05	4304.15	4741.7	5037.66	5066.39	5394.83	4207.93
18030	Nfil3	0.0107677	0	0	0	0	0	0	0	0	0	0	0	0	0	0	0	0	0	0	0	0	0	0	0	0	0	0	0	0	0	0	27.683	15.548	0	0	0	19.942	13.003	21.849	106.254	37.326	36.64	15.461	0	5.944
18032	Nfix	2.2e-21	178.087	107.247	85.083	123.918	80.108	82.244	87.947	112.778	53.71	18.14	140.95	135.769	225.517	119.959	209.111	406.824	214.323	215.405	350.948	296.734	272.658	610.525	514.459	478.887	755.977	603.666	522.307	622.79	629.275	807.798	2450.2	1795.86	2900.87	4024.44	3096.33	3106.02	3305.17	3641.47	3254.55	3891.42	3488.75	3426.62	3385.75	2691.72
18033	Nfkb1	0.133842	4.386	0.863	1.291	5.288	0	1.883	6.772	2.769	4.727	2.741	12.111	3.277	4.095	5.776	4.367	0	12.239	10.799	0	0	0	0	0	0	0	0	0	0	0	0	11.939	6.996	0	0	0	0	0	0	13.966	10.613	10.212	21.585	20.11	18.624
18034	Nfkb2	0.360951	0	0	0	0	0	0	0	0	0	0	0	0	0	0	0	0	0	0	0	0	0	0	0	0	0	0	0	0	0	0	0	0	0	0	0	0	0	0	3.955	0.556	0	0	0	0
235134	Nfrkb	6.91e-13	28.732	52.776	49.446	18.004	73.045	59.318	17.808	19.97	12.731	0	0	0	1.586	1.415	1.035	0	4.942	13.243	0	24.366	0.748	0	5.114	31.081	15.367	21.754	14.206	23.461	31.155	26.602	14.456	34.057	52.91	77.823	50.187	83.242	86.274	107.443	142.454	109.124	95.422	63.826	77.502	85.433
18044	Nfya	0.00015917	3120.13	3216.66	2436	3143.95	1640.37	1899.53	2243.82	3901.96	1232.84	432.84	1148.67	448.026	2386.06	678.761	615.997	985.086	444.538	486.686	243.741	662.931	551.587	1140.02	857.762	545.583	1709.7	1800.7	1808.63	1473.8	1451.48	1736.25	1473.3	3121.26	1094.95	1211.04	1188.77	704.38	1077.93	1020.6	1572.67	532.206	576.77	946.947	421.232	741.847
18045	Nfyb	0.000917106	399.628	278.768	386.701	540.534	223.423	254.548	323.041	67.753	130.501	0	0	0	0	0	0	0	0	0	0	0	0	202.871	18.374	0	0	0	0	0	0	0	893.484	625.841	0	0	0	0	0	0	0	0	0	0	0	0
18046	Nfyc	1.04e-07	5008.59	9392.3	8355.44	6720.28	6691.6	7352.03	4768.39	6618.93	6114.86	918.707	2095.87	893.835	3799.18	3896.75	3009.5	1545.24	1581.1	1760.98	640.026	2666.27	2132.86	2054.85	3661.05	3555.25	7782.73	6367.14	6139.43	6372.17	5912.91	5842.18	4210.18	5034.43	4308.43	4760.14	4246.36	3000.47	3040.5	3372.35	3521.28	2429.5	2822.82	2432.09	2432.63	2240.65
22260	Nr1h2	0.00618936	1.019	1.153	0	0	0	0	0	0	0	0	0	0	0	0	0	0	0	0	0	0	0	0	0	0	0	0	0	1.71	1.697	0	0	0	8.477	0	18.044	0	4.387	8.352	77.508	22.826	23.16	8.304	0	10.468
22259	Nr1h3	0.00832698	0	0	0	0	0	0	0	0	0	0	0	0	0	0	0	0	0	0	0	0	0	0	0	0	0	0	0	0	0	0	0	0	122.063	0	16.648	99.317	78.196	8.477	68.915	9.065	13.66	295.771	0	478.796
20186	Nr1h4	4.46e-07	0	0	0	0	0	0	0	0	0	0	0	0	0	0	0	0	0	0	0	0	0	0	0	0	0	0	0	0	0	0	28.719	28.872	37.379	52.972	46.615	102.957	115.378	132.904	314.005	105.109	78.102	67.091	75.468	70.038
18171	Nr1i2	0.655909	0	0	0	0	0	0	0	0	0	0	0	0	0	0	0	0	0	0	0	0	0	0	9.966	19.476	0	0	0	0	0	0	0	0	0	0	0	0	0	0	8.93	4.626	0	0	0	0
22025	Nr2c1	1.4e-08	65.185	53.331	37.074	30.563	12.411	16.487	6.558	34.94	0	0	0	0	0	0	0	0	0	0	0	0	0	0	0	0	0	0	0	0	0	0	0	0	0	0	0	0	0	0	0	0	0	0	0	0
22026	Nr2c2	1.18e-05	295.387	121.373	99.55	139.681	45.364	51.102	72.828	99.79	44.904	3.701	11.569	9.196	17.515	37.733	21.735	0	21.346	14.754	0	0	0	6.211	8.477	7.376	18.516	5.329	6.839	0	0	0	6.366	12.307	19.862	29.517	21.604	37.119	66.497	33.932	88.064	69.649	48.739	22.218	37.851	41.852
13865	Nr2f1	0.0174913	92.821	155.578	139.325	48.218	70.073	75.196	40.849	93.328	36.749	14.64	0	21.81	51.714	28.669	24.715	0	35.615	38.126	0	0	0	28.362	20.689	17.357	0	0	0	0	0	0	55.763	104.353	0	0	0	153.876	151.959	167.668	0	0	0	0	0	0
11819	Nr2f2	6.87e-08	404.83	327.956	452.521	166.853	177.932	193.482	131.969	202.264	77.246	42.133	72.855	51.813	119.852	87.129	62.29	89.726	92.52	108.249	52.924	25.529	24.766	76.852	77.355	45.941	76.525	65.741	58.251	78.691	81.901	84.995	229.591	193.806	254.839	253.876	244.789	337.696	325.709	378.884	395.632	208.604	193.271	155.275	194.172	171.941
13864	Nr2f6	7.51e-12	21.005	46.303	43.167	0	28.231	29.995	10.676	30.872	19	0	12.604	7.469	28.986	19.878	11.853	45.17	28.866	32.028	0	0	0	0	9.862	8.119	16.104	0	13.36	0	0	0	115.373	80.18	116.606	75.568	94.512	209.314	182.42	239.356	346.89	234.944	203.178	195.807	245.535	235.272
14815	Nr3c1	3e-20	0	0	0	0	1.255	1.545	0.956	5.337	1.5	0	0	0	0	0	0	5.614	0	2.539	0	2.182	1.634	0.418	1.422	0	0	0	0	4.764	2.456	4.373	2.87	3.454	36.747	30.383	33.672	36.325	35.839	41.1	43.878	23.127	19.489	24.543	31.194	26.487
26424	Nr5a2	1.27e-06	13.928	0	2.645	0	0	0	0	0	0	0	0	0	0	0	0	0	0	0	0	0	0	0	0	0	0	0	0	0	0	0	0	0	43.383	39.156	31.935	67.697	73.474	69.747	164.319	50.181	35.683	0	18.562	35.373
18181	Nrf1	1.34e-07	148.23	309.53	328.433	512.127	716.49	717.358	590.835	1161.71	900.547	787.912	789.548	976.723	1283.3	1505.62	1733.42	940.031	1078.75	1241.32	591.989	1620.97	1335.14	457.64	1441.4	1175.8	748.622	595.422	730.656	626.111	893.147	837.333	970.972	763.767	360.691	398.305	474.529	387.982	305.669	378.377	490.712	403.037	412.476	268.858	375.343	337.377
15379	Onecut1	0.00109195	13.743	0	10.405	0	0	0	0	0	0	0	0	0	0	0	0	17.794	20.561	15.135	115.511	91.352	42.424	30.644	60.41	28.879	0	0	0	0	0	0	83.197	70.519	0	0	0	107.309	104.618	106.383	267.995	98.051	100.014	100.469	104.044	95.405
225631	Onecut2	5.22e-05	10.999	13.351	13.276	0	0	0	3.767	9.802	0	1.931	15.649	18.326	0	0	0	0	0	0	0	43.081	36.885	0	0	0	0	0	0	0	0	0	69.58	56.53	32.67	44.802	52.712	99.919	113.056	112.588	255.807	0	101.457	0	107.758	102.066
246086	Onecut3	0.00543853	9.268	0	14.586	0	0	0	0	0	0	0	0	0	0	0	0	0	0	0	0	0	0	0	0	0	0	0	0	0	0	0	0	0	0	0	0	0	0	0	0	0	0	0	0	0
56218	Patz1	8.8e-06	45.214	59.631	37.265	0	42.347	52.259	0	10.618	28.769	0	0	0	6.045	0	21.295	9.643	16.82	8.462	0	0	0	0	0	0	0	0	0	0	0	0	0	0	32.431	32.86	0	31.72	13.916	33.318	0	0	0	0	0	0
67367	Paxbp1	0.264756	0	0	0	0	0	0	0	0	0	0	0	0	0	0	0	0	0	0	0	0	0	0	0	0	0	0	0	0	0	0	0	0	1.235	4.099	0	0	0	0	0	0	0	0	0	0
66923	Pbrm1	4.29e-05	8.588	21.98	24.641	9.363	31.581	32.869	10.061	13.241	13.287	11.701	2.007	5.224	27.819	5.095	10.321	8.762	16.987	8.497	8.863	9.826	14.647	5.146	5.945	8.826	37.429	27.81	24.387	27.622	28.935	28.046	25.195	26.97	47.288	39.559	58.189	35.96	37.813	30.983	50.848	17.042	13.12	15.705	13.063	10.936
18514	Pbx1	4.28e-06	39.221	68.706	58.178	13.899	29.057	30.514	0	0	0	0	0	0	0	0	0	0	0	0	0	0	0	0	0	0	0	0	0	0	0	0	17.332	60.03	21.024	18.87	27.488	19.431	19.967	11.651	0	0	0	0	0	0
18515	Pbx2	5.3e-11	46.84	92.413	106.882	41.649	53.52	54.933	26.317	20.588	23.946	0	1.922	5.107	8.258	12.958	11.062	0	11.025	10.643	5.143	7.255	8.568	2.891	3.156	0	5.105	4.747	0	2.557	5.091	0	11.168	25.704	9.69	7.531	6.704	12.446	17.233	20.099	22.348	5.649	0	6.154	0	6.956
18516	Pbx3	4.63e-10	41.418	53.244	55.51	10.326	18.543	24.835	11.142	15.344	4.833	0	0	0	0	0	0	0	0	0	0	0	0	0	0	0	0	0	0	0	0	0	0	0	0	0	0	0	7.601	8.557	0	0	0	0	0	0
18673	Phb	1.43e-05	7.178	28.326	59.338	12.319	72.815	35.118	29.521	125.578	181.632	105.233	103.591	98.937	88.909	38.404	48.377	209.204	47.691	44.692	261.328	67.493	71.578	41.545	64.011	56.085	155.108	168.919	72.318	172.932	285.861	398.472	132.902	143.53	327.921	309.796	270.878	162.471	385.801	287.626	152.799	80.908	109.984	237.583	259.79	241.18
56469	Pias1	0.00631904	0	6.496	5.502	0	3.744	5.859	2.783	3.421	7.899	0	0	0	0	0	0	0	0	0	0	0	0	0	0	0	8.122	2.326	9.223	2.49	31.662	11.742	6.461	10.861	0	0	0	12.543	1.889	6.14	23.822	11.971	13.808	0	0	0
59004	Pias4	1.69e-06	4.631	93.531	81.646	9.575	56.146	47.69	0	0	0	0	0	0	0	0	0	0	4.523	4.719	0	3.999	3.896	0	0	0	0	0	0	0	0	0	0	0	5.487	7.391	7.096	3.655	4.155	0	11.095	55.897	3.812	0	0	0
18771	Pknox1	0.216558	27.63	0	13.563	0	0	0	20.293	18.633	0	0	0	0	0	0	0	0	0	0	0	0	0	0	0	0	0	0	0	0	0	0	0	0	0	0	0	0	0	0	0	8.03	8.331	0	0	0
18986	Pou2f1	0.000333674	0	8.435	7.195	33.415	28.852	3.552	55.08	75.915	78.662	5.529	46.068	53.124	61.88	114.198	75.266	5.241	26.136	17.78	54.856	11.765	4.992	0	0	0	0	0	0	0	0	0	0	0	0	0	0	0	0	0	0	0	0	0	0	0
19013	Ppara	8.69e-05	0	0	0	0	0	0	0	0	0	0	0	0	0	18	16.592	0	28.863	28.128	0	0	0	11.965	1.542	2.501	0	0	0	0	0	0	99.319	110.781	82.359	62.98	74.028	24.333	45.93	33.307	197.69	47.436	60.04	62.579	56.922	52.62
19016	Pparg	0.246416	0	0	0	0	0	0	0	0	0	0	0	0	0	0	0	0	0	0	0	0	0	0	0	0	0	0	0	0	0	0	14.597	8.297	0	0	0	35.96	20.497	0	0	0	0	0	0	0
382066	Prdm10	4.44e-07	19.063	13.509	15.318	13.327	13.785	14.707	14.403	17.73	14.321	7.223	10.77	17.934	22.195	15.624	11.104	15.082	7.829	9.094	0	7.102	3.649	5.546	4.825	6.051	2.232	1.34	4.24	0	0	0	0	0	3.512	6.041	5.582	8.257	6.953	8.125	0	0	0	0	0	0
110593	Prdm2	1.39e-07	5.068	0	3.041	1.514	0.067	0.453	0	0	0	0	0	0	0	0	0	0	0	0	0	0	0	0	0	0	0	0	0	0	0	0	0	0	28.456	21.605	11.094	4.207	4.23	19.411	8.964	7.258	16.994	3.076	33.755	31.67
50907	Preb	0.344509	0	0	0	0	0	0	4.438	6.192	6.889	8.53	25.71	19.055	51.865	33.379	19.209	272.856	27.818	32.984	102.081	42.862	39.437	9.586	16.903	10.603	7.301	16.839	8.168	24.438	26.109	50.461	17.773	155.083	31.956	15.239	25.381	6.088	21.794	14.347	37.624	18.486	24.975	43.706	64.48	61.626
19130	Prox1	0.000121002	1.891	5.759	4.698	27.2	13.443	10.771	11.689	11.972	41.802	32.163	65.305	56.634	61.623	48.49	50.527	49.672	49.858	66.845	34.086	61.14	63.135	20.46	37.664	30.367	9.971	21.248	13.346	43.363	34.826	31.969	39.377	106.643	100.472	127.794	92.882	94.535	105.717	78.948	228.241	47.946	76.365	28.448	57.124	50.891
19290	Pura	5.12e-09	7.155	15.944	0	15.269	40.71	21.862	6.961	7.969	116.867	0	25.283	7.327	60.093	144.576	72.488	13.639	36.662	87.464	19.49	127.69	118.28	133.246	138.196	196.763	273.945	174.999	198.06	624.422	519.564	453.892	560.048	292.258	981.849	1072.66	975.869	867.872	758.233	660.531	2802.74	637.632	1086.8	865.399	973.108	996.196
19291	Purb	4.34e-11	38.299	98.718	121.484	69.266	97.846	155.557	72.177	43.85	174.258	18.741	71.784	55.303	232.676	230.126	308.066	61.873	211.968	240.207	49.48	350.22	237.681	262.532	443.011	416.356	293.479	287.158	337.289	234.332	560.09	556.752	429.668	303.573	737.384	374.191	658.916	611.814	580.009	667.805	1087.03	778.319	576.032	708.85	728.545	749.161
19401	Rara	0.00365889	3.844	8.52	7.212	0.62	1.516	5.422	1.207	5.939	11.462	0.096	2.396	3.091	7.95	0	3.561	0	2.574	4.902	0	0	0	0	0	0	0	0	0	0	0	0	12.812	14.38	17.257	0	13.809	9.536	14.392	0	38.85	37.654	10.313	26.739	0	3.316
218772	Rarb	1.22e-06	12.339	13.146	12.069	5.737	6.88	8.749	1.999	2.456	0	0	0	0	0	0	0	0	0	0	0	0	0	0	0	0	0	0	0	0	0	0	3.601	9.553	16.179	17.418	16.487	15.707	17.978	15.18	8.792	4.658	7.729	0	0	0
19411	Rarg	0.185283	6.201	7.108	9.923	1.267	2.949	3.829	1.563	2.11	1.53	0	0	0	5.083	0	0.645	0	0	0	0	0	0	0	0	0	0	0	0	0	0	0	22.977	20.994	0	0	0	4.847	10.312	8.953	41.755	10.262	3.441	0	0	0
19664	Rbpj	0.219541	117.826	359.138	273.211	107.063	375.069	524.678	161.207	330.099	224.595	217.886	246.593	221.017	236.29	387.433	417.138	467.962	375.594	411.156	276.909	349.023	338.802	85.498	350.277	314.296	151.347	241.629	202.763	188.09	237.188	239.779	195.507	263.65	268.493	288.402	225.192	296.429	289.805	281.768	182.345	241.265	240.383	380.01	182.001	382.496
217864	Rcor1	2.96e-06	87.833	203.294	171.719	40.969	136.702	170.455	70.056	24.089	66.41	24.109	4.33	5.364	21.779	65.636	60.583	32.811	70.874	72.651	16.763	37.461	48.559	31.151	58.608	25.58	70.547	62.369	71.247	129.945	140.96	150.738	150.347	669.395	328.312	255.194	313.398	326.252	278.403	292.358	309.227	232.62	276.112	192.585	249.942	170.594
104383	Rcor2	0.00047309	11.985	26.148	9.877	0	0	0	0	0	0	0	0	0	0	0	0	0	0	0	0	0	0	0	0	0	0	0	0	0	0	0	0	0	0	0	0	0	0	0	0	0	0	0	0	0
214742	Rcor3	4.17e-11	0	0	0	0	0	0	0	0	0	0	0	0	0	14.094	13.047	0	0	0	0	0	0	0	13.889	1.526	22.18	22.019	14.826	36.546	36.6	39.11	27.471	25.669	69.173	60.336	71.096	57.966	49.519	51.691	58.61	34.333	46.753	23.765	35.712	0
58887	Repin1	0.229269	0	0	0	0	0	0	0	0	0	0	0	0	0	0	0	0	0	0	1.032	3.886	0	0	8.771	5.87	0	0	0	0	0	0	0	0	0	0	0	0	0	0	0	0	0	0	0	0
19712	Rest	0.00181097	20.911	3.759	0.725	0	0.106	15.41	1.666	4.437	0	0	0	0	1.859	1.361	1.311	0	0	0	0	0.527	0.685	0	0	0	0	0.546	0.669	0.943	0	2.088	0	0	0	0	0	0	0	0	0	0	0	0	0	0
19724	Rfx1	1.52e-08	29.597	76.805	51.737	44.833	44.82	45.752	25.692	23.871	5.702	9.881	3.827	3.159	0	12.503	18.879	24.356	7.76	24.35	19.385	16.475	25.182	11.403	9.912	9.839	20.535	32.468	28.765	37.823	47.786	53.88	48.986	56.165	71.115	67.513	64.446	58.143	58.15	61.261	113.323	56.908	48.647	35.157	38.622	33.805
19725	Rfx2	6.1e-05	8.352	11.83	5.954	12.682	8.91	6.218	19.164	13.279	1.93	0	8.405	4.92	6.371	12.096	22.652	0	2.79	20.971	18.347	12.251	20.593	2.566	1.548	1.523	0	0	0	0	0	0	0	0	0	0	0	0	0	0	0	0	0	0	0	0
19726	Rfx3	0.000333475	4.989	12.705	9.713	8.353	5.534	8.895	4.588	2.863	1.352	3.158	3.784	5.599	8.349	5.139	4.282	2.707	4.47	7.176	10.06	7.809	6.641	0	0	0	0	0	0	0	0	0	5.921	9.926	0	0	0	0	0	0	9.453	0	3.276	0	0	0
53970	Rfx5	0.000768451	4.585	9.101	5.762	3.404	14.745	11.421	0	20.11	1.757	0	33.706	8.588	43.427	28.849	19.67	6.25	6.764	3.992	12.167	30.443	1.115	1.603	6.945	20.318	33.726	16.112	13.718	23.029	26.103	25.196	38.415	30.069	33.915	32.951	68.552	29.313	38.692	39.193	77.371	18.174	20.013	23.036	25.527	12.172
319758	Rfx7	1.2e-07	1.507	1.066	1.712	2.271	1.978	1.33	2.204	1.47	0	0	0.743	1.03	0	0	0	0	0	0	0	0	0	0	0	0	0	0	0	0	0	0	0	0	0	0	0	0	0	0	0	0	0	0	0	0
109263	Rlf	3.72e-06	2.633	5.277	4.16	4.182	5.436	8.899	4.034	5.067	2.551	0	0	0	0	0	0	0	0	0	0	0	0	0	0	0	6.617	3.042	0	0	0	0	0.831	2.963	0	0	0	0	0	0	0	0	0	0	0	0
19883	Rora	0.0148604	0	0	0	0	0	0	0	0	0	0	0	0	0	0	0	0	0	0	0	0	0	0	0	0	0	0	0	0	0	0	0	0	1.055	0	6.019	16.577	13.762	19.309	0	0	0	0	0	0
19885	Rorc	0.0330359	0	0	0	0	0	0	0	0	0	0	0	0	0	0	0	0	0	0	0	0	0	0	0	0	0	0	0	0	0	0	0	0	0	0	0	0	15.103	12.144	8.194	0	2.321	0	0	0
68750	Rreb1	1.15e-10	32.332	48.278	46.534	13.66	23.431	29.808	12.125	5.82	9.722	12.098	5.09	7.586	4.923	13.962	12.836	20.713	19.228	19.254	19.043	14.254	12.169	14.656	11.203	8.656	15.188	15.301	17.153	29.509	34.315	34.156	49.371	56.034	83.571	80.468	70.16	74.343	77.632	92.472	65.619	63.691	151.079	35.438	72.558	63.907
12394	Runx1	2.56e-08	90.628	106.849	89.409	39.501	44.789	51.72	35.867	51.202	49.263	17.886	26.218	25.684	27.988	31.874	34.486	29.354	27.691	38.254	29.579	62.157	45.984	28.096	42.421	29.986	38.021	37.832	28.757	28.067	17.011	25.363	40.341	110.336	0	0	0	0	0	0	0	0	0	0	0	0
12393	Runx2	0.154754	0	0	0	0	0	0	0	0	0	0	0	0	0	0	0	0	0	0	0	3.318	1.818	1.625	1.719	0	0	0	0	0	0	0	0	0	0	0	0	0	0	0	0	0	0	0	0	0
12399	Runx3	0.00710335	0	0	0	9.359	10.68	11.323	17.145	26.544	11.354	0	0	0	13.878	11.309	10.779	0	0	0	7.223	13.193	14.575	10.749	17.135	14.089	15.706	0	10.465	0	0	0	19.183	1.768	0	0	0	0	0	0	0	0	0	0	0	0
20181	Rxra	1.47e-15	73.334	100.205	60.822	43.931	80.092	73.007	62.152	72.523	66.738	19.615	48.78	26.036	85.873	77.811	90.893	59.1	123.434	134.59	55.869	90.479	99.589	80.004	120.684	119.995	154.642	127.428	118.424	182.345	208.904	217.306	453.371	504.594	663.985	760.479	764.783	1025.8	1073.51	1168.4	1810.65	1190.93	1276.23	761.691	929.713	1125.39
20182	Rxrb	2.79e-07	62.148	89.611	85.021	40.671	61.559	75.556	42.201	85.897	48.641	17.811	44.379	20.083	35.929	28.668	52.368	18.996	54.842	67.874	9.294	23.199	44.988	23.279	30.214	29.924	20.854	11.844	10.194	19.299	27.465	22.276	126.759	129.264	153.81	154.615	159.567	254.112	198.838	174.567	576.291	294.392	399.749	141.151	162.809	151.276
20183	Rxrg	2.56e-11	0	0	0	0	0	0	0	0	0	0	0	0	0	0	0	0	0	0	0	0	0	0	0	0	0	0	0	0	0	0	192.211	132.085	202.832	227.135	275.881	390.743	337.965	380.107	491.834	364.697	426.381	231.706	229.105	0
58198	Sall1	0.0350645	0	0	0	0	0	0	0	0	0	0	0	0	0	0	0	0	0	0	0	0	0	0	0	0	0	0	0	0	0	0	0.781	5.093	1.229	2.849	0	5.61	5.053	3.567	0	0	0	0	0	0
99377	Sall4	6.91e-05	1.936	3.095	2.892	0	0	0	0	0	0	0	0	0	0	0	0	0	0	0	0	0	0	0	0	0	0	0	0	0	0	0	0	0	0	0	0	0	0	0	0	0	0	0	0	0
20230	Satb1	0.00387907	0	0	0	0	2.406	2.658	0	0	0	0	0	0	0	0	0	0	0	0	0	0	0	0	0	0	0	0	0	0	0	0	0	0	0	0	0	0	0	0	0	0	0	0	0	0
17127	Smad3	0.00673911	0	2.132	1.75	0	0	0	2.357	0	2.242	0	0	0	0	0	0	0	0	0	0	4.095	1.816	0	0	0	3.24	2.942	4.357	0	1.755	4.53	0	0	3.877	5.009	5.987	3.207	2.004	4.877	0	0	0	4.521	4.733	0
17129	Smad5	0.533956	0	0	0	0	0	0	0	0	0	0	0	0	0	0	0	0	0	0	0	11.737	3.776	0	0	0	0	0	0	0	0	0	0	0	0	0	0	0	0	0	0	0	0	0	0	0
93761	Smarca1	1.64e-11	255.537	233.674	222.341	129.369	213.266	233.264	179.713	187.633	235.993	120.091	96.385	131.057	157.158	166.349	178.546	150.182	145.456	149.869	159.432	204.502	150.845	117.548	153.089	110.145	117.751	96.318	83.916	125.985	143.988	116.86	143.726	91.688	86.251	0	116.034	57.341	77.381	0	0	0	0	0	0	0
54380	Smarcal1	0.00146003	1.77	10.953	10.226	15.873	54.914	54.423	39.114	74.945	92.319	22.691	87.245	56.66	111.594	123.682	106.281	38.175	104.532	114.606	33.976	69.595	65.64	31.514	66.705	51.177	45.139	39.053	16.327	9.871	8.637	11.629	22.017	26.513	3.081	44.781	4.341	10.173	8.121	55.02	34.013	29.704	30.174	114.559	36.987	114.435
20588	Smarcc1	0.000501096	15.483	50.283	57.265	14.287	43.528	46.933	33.19	15.932	22.722	20.628	5.633	4.847	8.282	10.405	13.965	32.286	11.849	5.167	13.909	6.3	12.28	7.099	13.912	5.43	26.69	16.097	9.607	33.043	30.457	42.179	21.093	40.777	27.596	42.243	42.301	28.538	43.019	53.1	51.902	15.248	13.196	16.234	35.156	10.584
68094	Smarcc2	5.8e-12	4.693	31.424	43.96	7.229	43.022	41.816	15.194	7.056	32.774	4.332	0.727	1.105	2.377	8.999	13.393	4.603	9.54	3.354	3.717	18.581	12.464	6.077	22.513	16.111	63.001	51.751	34.143	106.141	88.712	98.926	36.044	54.295	176.689	153.958	153.198	139.418	165.441	162.517	168.548	65.234	74.071	74.434	111.462	74.825
57376	Smarce1	2.21e-08	18.593	55.519	58.321	12.411	40.014	42.375	28.939	7.59	33.082	10.097	0	0.557	7.561	21.084	20.319	7.575	14.891	10.498	5.787	8.693	5.727	14.51	17.557	10.775	50.347	46.279	51.518	92.035	51.822	42.239	53.663	79.559	69.999	60.986	90.771	99.976	94.35	111.299	133.627	44.036	51.429	53.014	61.689	21.298
20658	Son	0.0780035	16.79	24.088	22.662	45.198	39.382	52.149	32.985	256	69.877	28.873	43.814	17.936	101.426	114.547	79.797	89.18	36.815	37.28	16.998	45.85	33.816	21.919	74.599	57.248	40.081	47.684	67.437	102.611	106.634	128.473	74.371	119.03	50.136	64.194	58.54	26.822	20.67	23.861	35.759	51.027	62.664	42.556	38.02	55.762
20668	Sox13	0.00312743	8.624	6.729	2.774	0	0	0	3.425	3.803	0	0	0	0	0	0	0	0	0	0	0	0	0	0	0	0	0	0	0	0	0	0	0	0	0	0	0	0	0	0	0	0	0	0	0	0
20678	Sox5	0.00034418	36.618	31.47	32.669	0	0	0	0	0	0	0	0	0	0	0	0	0	0	0	0	0	0	0	6.697	6.633	0	0	0	0	0	0	0	0	23.265	0	40.105	22.199	18.984	22.905	21.87	11.776	10.639	0	0	0
20679	Sox6	3.45e-18	79.778	56.009	64.528	47.753	39.914	46.339	15.489	18.403	0	0	0	0	0	0	0	0	0	0	0	0	0	0	0	0	0	0	0	0	0	0	8.026	12.176	0	0	0	0	0	0	0	0	0	0	0	0
20684	Sp100	0.095048	0	0	0	0	0	0	0	0	0	0	0	0	0	0	0	0	0	0	0	0	0	0	0	0	0	0	0	0	0	0	5.501	21.937	0	0	0	0	0	0	0	0	0	0	0	0
109032	Sp110	0.0958198	0	0	0	0	0	0	0	0	0	0	0	0	0	0	0	12.096	0	11.17	22.512	16.163	13.844	23.15	0	23.514	0	0	0	0	0	0	33.527	28.521	0	0	0	0	0	0	0	0	0	0	0	0
78912	Sp2	0.000893537	7.695	2.236	3.433	0	0	0	0	0	0	0	0	0	0	0	0	0	0	0	0	0	0	0	0	0	0	0	0	0	0	0	0	0	0	0	0	0	0	0	0	0	0	0	0	0
20687	Sp3	0.00151329	524.683	449.763	294.71	544.872	227.043	247.786	399.046	452.723	174.046	297.165	146.662	114.522	221.206	143.258	240.907	0	0	0	0	0	0	0	148.878	151.018	149.449	246.716	139.935	252.955	92.463	152.066	127.088	187.079	304.862	180.517	313.565	207.119	215.014	172.891	125.788	130.873	109.841	64.7	97.25	64.71
272382	Spib	0.457633	0	0	0	0	0	0	0	0	0	0	0	0	0	0	0	0	0	0	0	0	0	0	28.835	16.964	0	0	0	0	0	0	0	0	0	0	0	0	0	0	0	0	0	0	0	0
20787	Srebf1	0.0491541	4.03	0	1.426	0	0	0	0	0	0	0	0	0	10.803	3.64	3.175	1.567	2.113	0	0	4.895	6.246	0	0	0	0	0	0	0	0	0	1.749	29.849	12.217	9.241	10.486	30.896	26.08	124.681	12.2	5.642	5.258	6.292	0	8.739
20788	Srebf2	0.133209	2.532	26.786	18.677	0	0	0	0	0	0	0	0	0	0	0	0	0	0	0	0	0	0	0	0	0	0	0	0	0	0	0	2.142	1.954	0	0	0	14.989	0	42.404	0	0	0	0	0	0
20807	Srf	0.750796	0	0	0	78.102	7.484	0	5.279	6.446	5.175	0	0	0	7.729	0	8.349	0	0	0	379.529	0	8.165	0	0	0	0	0	0	0	0	0	0	0	0	9.056	633.603	0	0	0	0	0	0	0	0	0
20833	Ssrp1	0.00150046	72.715	92.954	76.286	105.455	27.597	23.135	69.165	159.038	41.143	11.95	28.412	91.762	126.995	102.514	74.582	40.286	5.58	10.394	103.763	71.709	71.712	144.004	86.931	19.512	6.448	9.733	45.102	22.177	81.737	84.938	11.315	64.335	64.052	10.985	6.263	0	2.992	2.744	2.142	40.021	0	0	0	0
20846	Stat1	0.0407071	0	0	0	0	0	0	0	0	0	0	0	0	0	0	0	0	0	0	0	0	0	0	0	0	1.431	1.871	2.777	0	0	0	0	0	0	0	0	0	1.297	2.304	0	0	0	0	0	0
20847	Stat2	0.170587	0	0	0	0	0	0	0	0	0	0	0	0	0	0	0	0	0	0	0	0	0	0	0	0	0	0	0	0	0	0	0	0	3.156	0	4.506	0	0	0	0	0	0	0	0	0
20848	Stat3	0.039562	0	0	0	0	0	0	0	0	0	0	0	0	0	0	0	1.706	44.731	57.548	0	36.655	42.709	0	51.466	42.02	38.176	31.634	30.234	44.194	39.416	78.08	1.54	5.933	33.744	2.265	38.442	3.667	4.076	4.654	8.747	48.162	40.614	83.225	102.829	19.29
20851	Stat5b	0.209438	0	0	0	0	0	0	0	0	0	0	0	0	0	0	0	0	0	0	0	0	0	0	0	0	0	0	0	0	0	0	0	0	0	0	0	0	0	0	21.799	3.525	4.644	0	0	0
20024	Sub1	0.00238761	427.572	3062.27	3021.41	842.403	6233.01	5138.46	506.099	704.506	5752.02	1242.82	1250.03	1465.24	1415.38	7616.85	6889.55	3531.64	9481.14	9568.04	2337.19	10346.2	8553.11	3029.98	8654.7	8638.42	11912.5	8789.22	12458.4	13601.8	10843.1	11465.6	8007.4	592.066	5545.41	6269.12	5959.29	5576	5231.31	4857.9	2542.48	4350.21	4504.81	4634.36	6668.47	5270.19
231151	Tada2b	0.0728246	0	2.678	1.827	0	2.087	2.392	0	0	0	0	0	0	0	0	0	0	0	0	0	0	0	0	0	0	0	0	0	0	0	0	0	2.332	0	0	0	1.536	6.137	6.787	0	0	0	0	0	0
21349	Tal1	2.34e-10	120.196	208.544	182.21	106.818	211.286	235.088	86.565	38.409	160.504	78.198	17.286	23.295	0	103.645	111.343	61.072	59.893	71.698	18.461	37.007	35.625	0	0	0	43.073	34.756	35.577	14.061	17.434	15.172	0	0	0	0	0	0	0	0	0	0	0	0	0	0
21385	Tbx2	0.168202	0	6.277	5.997	0	0	0	0	0	0	0	0	0	0	6.266	4.005	0	3.245	3.747	0	9.838	5.65	0	7.28	7.787	0	0	0	0	0	0	9.756	41.982	0	13.839	6.006	20.553	29.65	16.742	16.804	10.083	0	0	0	0
21386	Tbx3	1.87e-06	17.96	20.859	24.486	5.778	23.647	12.128	3.393	4.866	2.972	0	0	0	0	0	0	0	0	0	0	6.434	4.428	0	0	0	6.362	0	2.157	6.081	8.309	0	8.896	50.148	14.662	19.533	20.708	67.396	53.64	72.939	56.178	18.912	58.132	18.078	19.351	23.899
21406	Tcf12	8.03e-10	17.647	14.675	16.639	20.58	20.344	12.676	16.999	7.557	0	7.658	4.836	7.001	8.18	7.045	9.444	12.479	5.624	0	12.765	11.164	7.277	11.416	6.752	5.171	0	5.589	6.205	9.049	6.051	6.658	0	0	2.76	0	2.765	1.359	2.286	2.901	0	0	0	0	0	0
21423	Tcf3	4.63e-09	55.886	131.282	99.865	22.468	53.378	67.805	25.049	10.116	48.072	16.224	11.194	14.067	13.031	43.842	43.97	22.559	39.047	28.63	11.677	6.176	30.041	28.584	23.548	21.641	15.584	11.765	15.503	0	0	0	16.129	12.57	0	0	0	0	0	0	0	0	0	0	0	0
21413	Tcf4	6.65e-10	8.02	3.838	7.94	8.252	4.397	2.094	0	0	0	0	0	0	0	0	0	0	0	0	0	0	0	0	0	0	0	0	0	0	0	0	0	0	0	0	0	4.32	4.19	2.028	0	0	0	0	0	0
21415	Tcf7l1	2.23e-05	17.248	9.371	9.634	8.627	6.102	6.382	7.884	16.179	5.446	8.751	12.98	12.168	15.323	17.62	15.271	28.101	13.391	12.645	19.37	18.316	16.318	0	14.411	8.579	0	0	0	0	0	0	20.422	24.394	0	0	0	0	0	0	0	0	0	0	0	0
21416	Tcf7l2	0.629944	8.74	19.448	27.11	0	10.81	13.782	0	0	0	0	0	0	0	23.15	15.53	10.9	12.995	14.506	11.785	56.002	42.803	11.756	72.674	58.843	12.21	18.647	18.052	30.602	30.806	35.089	29.622	15.412	0	23.936	24.276	13.679	25.245	25.537	29.753	44.408	29.257	19.665	11.24	24.537
21676	Tead1	2.19e-05	22.461	26.964	51.442	10.152	18.339	16.269	7.223	26.746	0	0	0	0	0	0	0	0	0	0	0	0	0	0	0	0	10.466	18.516	17.673	30.961	34.918	33.54	51.988	33.361	0	48.713	24.307	26.698	18.907	22.14	27.792	8.77	10.416	0	0	0
21678	Tead3	1.38e-07	37.105	54.319	49.284	14.582	10.283	22.222	13.126	11.079	0	0	7.329	7.749	9.507	0	11.522	0	15.621	17.873	0	12.785	12.619	11.77	19.386	16.824	0	25.635	22.764	0	78.057	77.053	57.732	49.841	66.566	65.819	68.857	59.213	84.729	59.436	43.092	47.932	29.498	76.656	53.494	53.636
21749	Terf1	0.000503523	0.883	1.562	2.84	0	0	0	0	0	0	0	0	0	0	0	0	0	0	0	0	0	0	0	0	0	0	0	0	0	0	0	0	0	0	0	0	0	0	0	0	0	0	0	0	0
21750	Terf2	0.000206485	5.862	15.7	17.291	13.455	5.563	10.507	14.995	12.796	6.605	0	8.885	14.713	0	1.444	10.344	0	2.077	1.786	6.642	5.409	7.859	4.365	8.577	5.336	6.649	4.75	2.916	5.705	3.992	3.834	0	0	0	4.269	5.59	3.159	5.078	0	0	0	0	0	0	0
21780	Tfam	7.99e-18	5732.47	3062.49	2751.4	2633.7	1577.8	1889.47	1560.37	1007.17	1080.41	1177.04	1082.66	1480.78	1323.75	2294.01	2039.32	2582.81	2853.49	3474.93	3838.59	5028.33	5270.95	9374.39	6408.49	5288.24	6996.6	7579.07	7850.45	12342.1	10893.2	10680.3	12683.5	9632.98	21206	17413	18206.2	21406.2	21538.3	21533.3	16128.1	28956.3	30890.8	26001.9	26853.8	26513
83383	Tfap4	1.83e-07	273.864	152.823	198.769	162.263	88.986	101.04	118.391	200.893	41.474	27.61	94.38	84.32	84.23	40.124	66.042	37.071	25.383	42.036	55.293	34.46	66.031	50.566	28.086	26.104	14.709	7.072	9.31	10.792	8.297	0	148.432	47.965	0	3.969	3.302	0	5.843	3.79	0	0	0	0	0	0
224481	Tfb1m	0.144773	0	0	0	0	0	0	0	0	0	0	0	0	0	0	0	0	0	0	4.508	4.777	5.123	0	0	0	0	0	0	0	0	0	5.811	29.089	8.712	10.726	10.943	8.543	7.709	5.901	0	0	0	0	0	0
21422	Tfcp2	0.000140478	12.086	165.871	142.082	3.475	10.562	15.179	0	0	0	0	0	0	0	0	0	0	0	0	0	0	0	0	0	0	0	0	0	0	0	0	0	0	282.499	143.994	57.874	55.488	131.244	73.709	101.448	63.872	37.064	7.27	29.939	38.2
21781	Tfdp1	6.33e-08	39.562	78.202	63.039	44.205	52.708	52.581	52.543	91.606	32.617	24.621	30.274	34.79	22.827	46.803	37.754	44.454	32.465	36.743	17.316	25.903	21.233	15.388	12.063	14.546	0	0	0	0	0	0	18.161	45.924	0	0	0	11.008	0	12.208	0	0	0	0	0	0
211586	Tfdp2	7.89e-07	35.141	36.242	14.617	44.407	36.394	33.976	48.929	118.125	29.988	55.606	96.831	87.759	108.473	83.144	44.712	46.194	53.299	40.344	27.674	45.045	19.567	28.75	45.561	23.95	0	0	0	0	0	0	35.621	39.537	0	0	0	0	0	0	23.323	8.69	0	0	0	0
209446	Tfe3	1.23e-05	29.42	45.623	24.141	10.154	0	7.982	0	0	0	0	0	0	0	0	0	0	0	0	0	0	0	0	0	0	12.218	13.248	0	0	22.834	16.268	34.547	12.84	32.82	0	30.691	34.134	0	38.056	60.897	21.347	21.576	23.026	20.419	24.269
21425	Tfeb	0.0011108	36.987	52.246	35.594	8.674	12.258	15.484	8.388	24.847	0	0	15.763	18.584	0	16.201	18.954	5.291	15.362	18.057	0	0	0	50.029	16.132	14.823	16.058	15.95	22.334	24.601	34.478	32.033	159.83	62.264	79.319	63.593	47.404	82.716	54.856	50.876	90.517	19.713	53.952	30.792	43.101	22.873
21815	Tgif1	0.00413745	2.294	0	2.838	0	0	0	0	0	0	0	0	0	0	0	0	0	0	0	0	0	0	0	0	0	0	0	0	0	0	0	0	0	0	0	0	0	0	0	0	0	0	0	0	0
228839	Tgif2	0.00175894	19.743	14.103	9.16	13.065	8.232	5.187	13.317	10.588	0	0	0	0	0	0	0	0	0	0	0	0	0	0	24.872	23.049	0	0	0	0	0	0	0	0	0	0	0	0	0	0	0	0	0	0	0	0
73754	Thap1	2.95e-05	32.315	18.538	6.951	0	6.014	6.503	0	0	0	0	0	0	0	0	0	0	0	0	0	0	0	0	0	0	0	0	0	0	0	0	0	0	0	0	0	6.09	0	6.832	0	0	0	0	0	0
21833	Thra	0.0273875	6.993	10.962	9.292	5.813	8.026	10.092	0	23.782	7.547	0	0	0	4.777	0	9.987	0	4.459	8.238	0	0	0	0	0	0	0	0	0	0	0	0	0	0	0	0	0	9.96	0	8.94	11.864	6.953	0	0	0	0
21834	Thrb	0.000117281	0	0	0	0	0	0	0	0	0	0	0	0	0	0	0	0	0	0	0	0	0	0	0	0	0	0	0	0	0	0	5.788	1.963	61.852	71.621	4.68	13.032	43.812	13.862	21.395	13.194	11.382	9.625	0	10.094
77862	Thyn1	3.41e-14	49.686	241.877	180.174	41.051	120.659	124.389	13.424	12.366	0	0	0	0	0	0	0	0	0	0	0	0	0	0	0	0	78.108	71.129	65.765	81.665	61.671	54.55	69.319	69.646	149.629	130.699	191.584	183.658	285.605	255.047	297.721	315.497	289.513	250.083	159.086	213.475
252838	Tox	0.432566	0	0	0	0	0	0	0	0	0	0	0	0	0	0	0	0	0	0	0	0	0	0	21.579	17.826	0	0	0	0	0	0	0	0	0	0	0	0	0	0	0	0	0	0	0	0
268741	Tox4	0.000249102	2.085	26.24	31.713	2.601	26.498	28.538	0	0	0	0	0	0	0	0	0	0	0	0	0	0	0	0	0	0	12.849	13.42	14.001	15.927	0	17.16	2.066	0	0	27.452	24.73	29.408	53.05	29.229	0	0	0	33.791	0	29.221
83925	Trps1	7.06e-05	4.912	5.857	4.624	0	0	0	0.667	0.82	0	0	0	0	0	0	0	0	0	0	0	0	0	0	0	0	0	0	0	0	0	0	0	0	0	0	0	0	0	0	0	0	0	0	0	0
228911	Tshz2	0.052329	0.327	0	2.592	0	0	0	0	0	0	0	0	0	0	0	0	0	0	0	0	0	0	0	0	0	0	0	0	0	0	0	0	0	0	0	0	0	0	0	0	0	0	0	0	0
22130	Ttf1	0.0380035	0	0.583	1.458	0	2.111	2.953	0	0	0	0	0	0	0	0	0	0	0	0	0	0	0	0	0	0	0	0	0	0	0	0	0	0	0	0	0	3.72	2.647	2.521	33.637	0	5.636	8.256	0	9.541
22221	Ubp1	1.14e-08	106.353	676.101	584.453	20.051	89.025	98.921	8.455	0	20.67	0	0	0	0	2.735	16.403	2.312	25.376	23.91	0	0	0	1.512	0	21.119	6.565	1.66	7.01	17.204	26.089	25.679	0	38.239	260.127	371.755	374.83	324.693	289.721	298.709	455.249	315.377	297.319	256.949	283.065	247.39
21429	Ubtf	3.07e-06	2660.84	2556.32	2228.91	2488.13	1442.27	1683.26	2884.49	2871.03	1439.55	1091.16	860.668	457.328	1054.45	1273.5	1163.49	1417.51	435.27	565.06	1339.09	730.402	778.465	1630.64	983.159	877.984	479.768	454.449	474.034	698.541	671.724	617.077	730.459	1139.84	547.832	499.704	645.635	850.728	740.715	670.449	1180.79	328.109	320.386	385.536	349.563	363.711
22278	Usf1	0.00108306	520.192	443.491	475.652	325.136	126.635	280.168	312.127	153.066	213.497	135.77	102.099	203.139	199.254	198.519	111.256	271.585	91.254	100.595	293.919	34.487	66.904	205.457	163.383	140.379	0	20.006	10.196	24.292	13.944	31.886	405.583	264.974	127.599	126.921	125.373	151.425	173.96	116.836	473.261	186.458	177.06	117.422	116.444	151.081
22282	Usf2	1.88e-09	271.263	199.206	195.968	230.429	88.835	0	0	0	0	0	0	0	0	0	0	0	0	0	0	0	0	0	0	0	0	0	0	0	0	0	0	0	0	0	0	0	72.942	74.818	0	0	0	0	0	0
22344	Vezf1	0.000126485	64.474	111.851	67.452	0	0	0	24.332	27.814	48.2	0	0	0	5.889	0	38.067	12.922	29.509	18.469	0	0	0	7.799	24.879	27.945	0	0	0	0	0	0	28.165	48.909	61.749	78.062	49.192	65.513	52.446	77.125	24.226	57.129	59.158	39.777	43.124	45.719
22404	Wiz	2.56e-07	88.434	139.066	134.01	29.763	23.476	20.225	10.549	9.252	2.648	0	0	0	0	0	0	0	0	0	0	0	0	0	0	0	3.813	3.391	3.046	2.24	4.394	6.752	0	0	10.099	13.417	10.691	19.888	31.461	19.176	23.669	0	5.456	20.734	10.58	0
22433	Xbp1	0.000474548	5.851	2.279	0	0	0	0	0	0	0	0	0	0	0	0	0	0	0	0	0	0	0	0	0	0	0	0	0	0	0	0	0	0	0	0	0	19.446	13.801	18.99	29.354	27.837	20.666	0	0	0
22608	Ybx1	0.000383957	1387.15	2140.26	2193.12	1119.37	2006.92	2633.07	430.257	1255.08	1452.07	298.099	1003.16	291.904	702.11	980.822	638.814	0	496.897	1117.05	599.497	1127.62	632.947	682.183	1320.37	1199.25	2140.33	2493.12	2402.54	2650.21	2651.25	2393.3	1081.29	2581.22	4467.54	2826.75	3550.98	629.704	597.393	612.395	1241.09	863.291	884.102	1476.31	1064.61	1445.44
56449	Ybx3	0.00394371	653.451	505.885	570.42	755.792	884.585	1167.45	507.125	1019.27	1047.6	138.599	672.501	275.012	402.298	514.889	656.394	394.47	482.096	678.654	308.568	596.72	538.22	368.24	656.701	616.222	815.874	991.127	1076.95	1252.87	762.983	698.393	474.646	1386.5	1221.18	806.563	901.598	267.178	256.978	273.87	373.756	262.781	212.738	339.669	371.05	0
64050	Yeats4	2.39e-10	0	9.37	7.949	2.776	8.979	8.73	0	0	0	0	0	0	0	0	0	0	0	0	0	0	0	0	0	0	0	0	0	0	0	0	0	0	0	0	0	0	0	0	0	0	0	0	0	0
22632	Yy1	2.22e-08	142.896	611.956	477.507	251.797	767.027	1024.88	346.206	131.557	583.382	291.262	70.712	50.557	94.228	327.346	432.575	442.17	178.752	215.024	160.893	91.294	0	77.769	140.125	124.053	382.03	364.138	320.606	346.726	373.13	401.47	206.347	249.024	589.144	780.786	702.49	663.74	695.547	678.801	723.416	818.441	712.372	721.995	693.867	650.924
229055	Zbtb10	0.0607498	6.569	6.535	131.514	0	0	0	0	0	0	0	0	0	0	0	0	0	0	0	0	0	0	0	0	0	0	0	0	0	0	0	0	0	0	0	0	0	0	0	0	0	0	0	0	0
22642	Zbtb17	0.0786497	0	0	0	0	0	0	0	0	0	0	0	0	0	0	0	0	0	0	0	0	0	0	0	0	0	0	0	0	0	0	0	0	0	0	0	1.171	0.533	0.519	0	0	0	0	0	0
56490	Zbtb20	1.07e-07	0	0	0	0	0	0	0	0	0	0	0	0	0	0	0	0	0	0	0	0	0	0	0	0	0	0	0	2.239	6.674	8.785	11.411	36.62	222.361	232.23	206.311	410.151	446.822	404.083	1476.09	1208.61	1131.38	545.483	479.043	485.245
241311	Zbtb34	0.00426139	0	0	0	0	0.866	1.111	0	0	0	0	0	0	0	0	0	0	0	0	0	0	0	0	0	0	0	0	0	0	0	0	0	0	0	0	0	0	0	0	0	0	0	0	0	0
232879	Zbtb45	8.24e-05	0	0	0	0	0	0	0	0	0	0	0	0	0	0	0	0	0	0	0	0	0	0	0	0	0	0	0	0	0	0	0	0	37.837	54.316	30.487	71.313	55.828	66.42	0	156.75	107.176	0	0	0
100090	Zbtb48	0.0451908	4.459	4.568	2.862	5.418	0.748	0	0	0	0	0	0	0	0	0	0	0	0	0	0	0	0	0	0	0	0	0	0	0	0	0	0	0	2.28	0	30.224	18.453	2.597	12.605	0	0	0	0	0	0
16969	Zbtb7a	0.00676315	8.924	16.125	9.579	12.61	35.023	54.031	55.318	37.582	0	22.847	0	15.448	0	0	0	0	0	0	0	0	0	0	0	0	0	0	0	0	0	0	0	0	0	0	0	0	0	0	0	4.968	6.756	0	0	0
22724	Zbtb7b	6.95e-13	0	0	0	0	0	0	0	0	0	0	0	0	0	0	0	0	0	0	0	0	0	0	0	0	0	10.388	6.597	0	0	0	0	0	34.888	32.029	32.695	78.646	81.938	87.175	92.728	36.039	43.194	40.363	47	45.289
21417	Zeb1	0.128159	0	0	0	0.859	0	2.847	0.718	1.095	3.373	0	0	0	2.134	4.494	3.813	0	0	0	0	0	0	0	0	0	0	0	0	0	0	0	0	0	0	0	0	0	0	0	0	0	0	0	0	0
24136	Zeb2	0.0103719	11.203	37.546	4.897	2.546	8.145	7.936	4.176	0.517	8.25	0	0	0	3.333	4.663	6.85	5.568	6.015	1.811	0	1.724	1.313	0	2.008	3.009	0	6.234	3.341	6.207	8.372	14.846	5.008	17.324	3.11	9.925	0.529	6.13	7.192	3.316	3.71	1.984	2.702	0	3.924	9.084
11906	Zfhx3	0.0179167	7.949	3.228	2.671	3.396	0.514	8.4	0.318	2.451	0.342	0.677	1.212	1.255	3.94	0.972	0.602	0	0.786	0.652	0.913	0.544	0.298	1.614	0.33	0.264	0.6	0.274	0.389	0.28	0.464	1.042	5.502	4.026	2.495	1.276	3.044	4.064	1.829	2.095	9.526	1.143	0.72	12.361	0.67	1.205
80892	Zfhx4	0.0272661	6.474	1.16	0.765	0	0	0	0	0	0	0	0	0	0	0	0	0	0	0	0	0	0	0	0	0	0	0	0	0	0	0	0	0	1.329	0.983	1.108	0.648	0.805	0	0	0	0	0	0	0
22661	Zfp148	6.38e-14	83.797	174.22	148.501	46.045	44.861	50.209	19.106	16.865	12.058	0	0	0	0	12.803	11.607	17.977	12.236	11.371	20.65	19.439	12.695	21.974	32.214	25.98	79.443	74.886	73.005	99.823	111.412	101.809	77.546	60.54	264.67	303.264	266.983	248.667	218.401	231.847	258.121	178.005	149.501	144.926	159.998	117.345
22680	Zfp207	0.000126951	0	15.113	17.987	3.667	11.859	14.491	0	0	0	0	0	0	0	0	0	0	0	0	0	0	0	0	0	0	0	0	0	0	0	0	0	0	6.699	12.18	19.983	12.219	21.295	17.991	0	0	0	0	0	0
69890	Zfp219	0.0010834	6.278	6.919	4.348	0	5.287	10.53	2.741	3.775	3.155	0	0	0	0	0	0	0	2.108	1.633	0	0	0	0	0	0	0	0	0	0	0	0	0.366	10.16	11.235	7.559	6.178	9.555	0	16.112	13.362	4.93	0	1.51	1.597	1.822
329002	Zfp236	6.29e-05	4.834	1.496	2.06	0.863	1.704	1.698	0.417	1.969	0	0	0	0	0	0	0	1.834	0.54	0.909	0	0	0	0.51	0	0.584	0	0.209	0.339	0	0	0	0	0	1.187	1.782	0.64	0.822	0.948	1.413	0.109	0.679	0	0	0	0
57247	Zfp276	0.16137	0	0	0	0	0	0	0	0	0	0	0	0	0	0	0	0	0	0	0	0	0	0	0	0	0	0	0	0	0	0	0	0	0	0	0	3.483	0	3.966	0	0	0	0	0	0
208968	Zfp280c	5.06e-05	2.181	2.036	2.371	2.653	0	2.534	0	0	0	0	0	0	0	0	0	0	0	0	0	0	0	0	0	0	0	0	0	0	0	0	3.518	3.943	0	0	0	0	0	0	0	0	0	0	0	0
226442	Zfp281	0.000242949	20.416	1.441	0	0	0	0	0	0	0	0	0	0	0	0	0	0	0	0	0	0	0	0	0	0	0	0	0	0	0	0	3.177	27.722	4.246	9.384	13.228	12.559	8.181	10.248	40.104	15.952	7.003	10.063	13.627	14.648
30046	Zfp292	0.000105418	12.433	4.332	3.956	2.854	3.794	2.375	2.313	3.603	1.553	0	0	0	0	0	0	1.223	0.366	0	1.778	0.294	0	0	0	0	0	0	0	0	0	0	1.595	7.874	0	0	0	0	0	0	0	0	0	0	0	0
54367	Zfp326	0.000178705	0	2.352	1.426	0	0	0	0	0	0	0	0	0	0	0	0	0	0	0	0	0	0	0	0	0	0	0	0	0	0	0	0	0	13.579	13.841	36.102	0	0	0	22.015	12.874	6.942	9.203	0	8.814
230761	Zfp362	0.122324	3.353	9.129	12.423	0	0	0	0	0	0	0	0	0	0	0	0	0	0	0	0	0	0	0	0	0	0	0	0	0	0	0	2.751	9.525	13.004	0	14.626	0	0	0	0	0	0	0	0	0
269800	Zfp384	0.202313	2.93	9.825	9.03	0	4.196	4.241	0	0	0	0	0	0	0	0	0	0	0	0	0	0	0	0	0	0	0	0	0	13.836	13.317	12.036	21.306	660.427	30.264	21.016	33.522	13.856	20.251	14.595	27.718	19.979	18.919	8.583	0	15.159
380912	Zfp395	0.00121285	1.255	6.991	8.75	0	0	0	0	0	0	0	0	0	0	0	0	0	0	0	0	0	0	0	0	0	0	0	0	0	0	0	0	0	0	0	0	0	0	0	0	0	0	0	0	0
67255	Zfp422	0.334461	0	0	0	0	0	0	0	0	0	0	0	0	0	0	0	0	0	0	0	17.595	20.812	0	46.787	26.368	0	0	0	0	0	0	0	0	8.868	21.032	0	0	0	0	0	0	0	0	0	0
269639	Zfp512	0.00189708	98.953	41.793	39.717	57.578	29.361	32.139	46.392	29.293	22.599	29.076	6.421	4.392	9.893	19.457	27.932	58.501	8.599	12.145	45.77	19.566	21.253	24.688	109.813	99.536	24.754	17.752	20.021	12.093	26.63	26.208	18.461	60.654	82.016	113.285	98.009	103.875	112.613	80.961	206.376	64.504	53.038	25.411	36.721	27.292
233410	Zfp592	1.62e-08	0	0	0	0	0	0	0	0	0	0	0	0	0	0	0	0	0	0	0	0	0	0	0	0	0	0	0	0	0	0	0	0	4.193	5.423	0	6.81	5.49	5.541	5.128	12.597	5.98	4.295	0	4.274
214812	Zfp609	0.00452924	1.881	0	1.382	0	0	0	0	0	0	0	0	0	0	0	0	0	0	0	0	0	0	0	0	0	0	0	0	0	0	0	0	0	0	0	0	0	0	0	0	0	0	0	0	0
22720	Zfp62	0.105777	0	0	0	0	0	0	2.891	1.533	0	0	0	0	5.632	0	1.926	0	0	0	0	0	0	2.428	0	0.269	0	0	0	0	0	0	0	0	0	0	0	0	0	0	0	0	0	0	0	0
320683	Zfp629	0.185813	0	0	0	0	0	0	0	0	0	0	0	0	0	0	0	2.407	0	1.761	0	0	0	0.771	3.972	3.793	0	0	0	0	0	0	0.489	1.87	0	0	0	0	0	0	0	0	0	0	0	0
52397	Zfp644	0.0132717	381.972	49.226	74.265	0	0	0	1.356	1.512	0	0	0	0	0	0	0	0	0	0	0	0	0	0	0	0	0	0	0	0	0	0	0	0	0	0	0	0	0	0	0	0	0	0	0	0
268469	Zfp652	0.00505586	0	0	0	0	0	0	0	0	0	0	0	0	0	15.418	12.911	4.252	12.174	13.784	0	0	0	0	0	0	0	0	0	0	0	0	2.426	10.915	16.366	16.749	7.353	12.436	7.579	8.751	8.645	13.775	19.436	0	0	0
72611	Zfp655	0.430462	0	0	0	0	0	0	2.018	1.972	0	0	0	0	0	0	0	0	0	0	0	0	0	0	0	0	0	0	0	0	0	0	0	0	0	0	0	0	0	0	0	0	0	0	0	0
78266	Zfp687	9.74e-08	5.157	4.884	7.526	5.852	6.651	11.489	0	0	0	0	0	0	0	0	0	0	0	0	0	0	0	0	0	0	3.435	5.304	2.004	5.872	0	4.244	0	9.089	3.62	3.035	5.087	2.76	5.992	0	4.872	2.033	1.351	0	0	0
195522	Zfp691	0.161605	0	0	0	0	0	0	0	0	0	0	0	0	0	0	0	0	0	0	0	0	0	0	0	0	0	0	0	0	0	0	0	0	0	0	0	0	0	0	6.065	5.193	0	0	0	0
244216	Zfp771	0.508593	0	0	0	0	0	0	10.398	4.071	0	0	0	0	0	0	0	0	0	0	0	0	0	0	0	0	0	0	0	0	0	0	0	0	0	0	0	0	0	0	0	0	0	0	0	0
627049	Zfp800	0.118819	6.699	11.111	8.332	33.416	28.373	35.837	24.669	34.082	31.08	7.268	0	3.598	20.451	21.889	24.801	12.807	5.57	12.095	0	21.451	14.8	15.347	16.626	5.104	24.421	20.335	30.697	26.58	34.801	9.2	13.389	43.176	6.956	33.687	32.037	21.923	26.543	28.591	0	30.44	13.16	30.228	27.743	31.597
22761	Zfpm1	4.85e-07	14.094	26.442	18.554	2.062	17.949	19.596	4.35	8.175	6.016	0	0	0	1.123	1.556	1.837	0	0	0	0	2.819	1.463	0	0	0	0	0	0	0	0	0	0	0.764	0	3.365	3.141	4.304	9.408	9.292	17.894	10.328	10.894	7.154	26.177	20.287
22764	Zfx	3.39e-12	31.033	24.397	18.667	21.956	11.912	13.503	10.083	0	4.589	0	0	0	0	3.711	3.597	0	0	0	0	0	0	12.913	4.914	7.638	21.108	18.978	18.06	18.684	18.589	18.035	11.438	0	51.413	47.811	43.222	45.339	49.665	50.3	22.584	40.035	34.629	21.994	22.062	24.922
22770	Zhx1	0.0004885	0	0	0	0	0	0	1.887	2.921	0	2.069	2.522	4.355	6.799	2.239	3.156	0	0	0	0	3.072	4.351	0	0	0	0	0	0	0	0	0	0	20.217	11.048	6.523	0	15.92	16.803	10.528	37.221	16.058	19.874	7.796	0	3.37
387609	Zhx2	2.98e-10	0	0	0	0	0	0	0	0	0	0	0	0	0	0	0	0	0	0	0	0	0	0	0	0	0	0	0	0	0	0	0	0.676	17.617	19.695	26.565	83.077	93.98	96.082	117.223	183.531	146.248	99.847	95.683	105.354
320799	Zhx3	9e-06	0	0	0	0	0	0	0	0	0	0	0	0	0	0	0	0	0	0	0	0	0	0	0	0	0	0	0	0	0	0	0	0	14.301	20.262	13.02	41.867	15.965	25.089	100.665	37.532	33.734	0	24.519	19.092
72739	Zkscan3	0.0256032	0	0	0	0	0	0	0	0	0	0	0	0	0	0	0	0	0	0	0	0	0	0	0	0	0	0	0	0	0	0	0	0	0	0	0	0	1.21	1.426	0	9.474	29.431	26.635	0	49.911
98999	Znfx1	0.000142692	0	0	0	0	0	0	0	0	0	0	0	0	0	0	0	0	0	0	0	0	0	0	0	0	0	0	0	0	0	0	0	2.049	0	0	0	0	1.169	1.408	3.233	1.845	3.548	5.169	1.738	3.907

## Sheet: Sheet5
Gene.ID	GeneSymbol	Ratio	specific phasee	specificity	Cluster1	Cluster2	Cluster3	Cluster4	FDR	E12.5 R1	E12.5 R2	E12.5 R3	E13.5 R1	E13.5 R2	E13.5 R3	E14.5 R1	E14.5 R2	E14.5 R3	E15.5 R1	E15.5 R2	E15.5 R3	E16.5 R1	E16.5 R2	E16.5 R3	E17.5 R1	E17.5 R2	E17.5 R3	E18.5 R1	E18.5 R2	E18.5 R3	D1 R1	D1 R2	D1 R3	D3 R1	D3 R2	D3 R3	D5 R1	D5 R2	D5 R3	W1 R1	W1 R2	W2 R1	W2 R2	W2 R3	W3 R1	W3 R2	W3 R3	W6 R1	W6 R2
18024	Nfe2l2	Inf	1	phase-specific TFs	1.389	0	0	0	0.045131	7.249	1.088	0	0	0	0	0	0	0	0	0	0	0	0	0	0	0	0	0	0	0	0	0	0	0	0	0	0	0	0	0	0	0	0	0	0	0	0	0	0
30942	Hnf4g	3.55482	1	phase-specific TFs	12.321	3.466	0	0	0.0423243	36.41	18.035	19.479	0	0	0	25.882	36.515	0	0	0	0	0	0	0	0	0	0	0	0	0	0	0	0	0	0	0	0	0	0	0	0	0	0	0	0	0	0	0	0
29808	Mga	22.6991	1	phase-specific TFs	80.65	3.553	2.999	1.459	0.0353608	29.514	22.236	18.797	8.401	399.715	5.236	6.021	6.651	2.387	2.138	5.033	3.392	3.619	5.014	4.761	0	3.377	4.187	1.702	4.446	3.136	3.358	2.674	2.051	4.801	2.843	0	2.749	2.004	2.906	3.773	4.914	1.421	0.889	1.64	2.481	1.977	2.569	4.401	1.267
116871	Mta3	1.56528	1	phase-specific TFs	5.131	0	2.233	3.278	0.028778	0	11.75	10.505	1.988	6.54	0	0	0	0	0	0	0	0	0	0	0	0	0	0	0	0	0	0	0	0	0	0	0	0	0	5.449	12.412	8.214	8.876	0	9.22	13.021	0	0	0
21833	Thra	2.61176	1	phase-specific TFs	8.53	3.266	0	3.143	0.0273875	6.993	10.962	9.292	5.813	8.026	10.092	0	23.782	7.547	0	0	0	4.777	0	9.987	0	4.459	8.238	0	0	0	0	0	0	0	0	0	0	0	0	0	0	0	0	0	9.96	0	8.94	11.864	6.953
80892	Zfhx4	3.44828	1	phase-specific TFs	1.4	0	0	0.406	0.0272661	6.474	1.16	0.765	0	0	0	0	0	0	0	0	0	0	0	0	0	0	0	0	0	0	0	0	0	0	0	0	0	0	0	0	0	1.329	0.983	1.108	0.648	0.805	0	0	0
13865	Nr2f1	2.4549	1	phase-specific TFs	96.868	25.146	20.014	39.459	0.0174913	92.821	155.578	139.325	48.218	70.073	75.196	40.849	93.328	36.749	14.64	0	21.81	51.714	28.669	24.715	0	35.615	38.126	0	0	0	28.362	20.689	17.357	0	0	0	0	0	0	55.763	104.353	0	0	0	153.876	151.959	167.668	0	0
52397	Zfp644	529.836	1	phase-specific TFs	84.244	0.159	0	0	0.0132717	381.972	49.226	74.265	0	0	0	1.356	1.512	0	0	0	0	0	0	0	0	0	0	0	0	0	0	0	0	0	0	0	0	0	0	0	0	0	0	0	0	0	0	0	0
24136	Zeb2	1.57115	1	phase-specific TFs	12.046	2.735	7.667	4.301	0.0103719	11.203	37.546	4.897	2.546	8.145	7.936	4.176	0.517	8.25	0	0	0	3.333	4.663	6.85	5.568	6.015	1.811	0	1.724	1.313	0	2.008	3.009	0	6.234	3.341	6.207	8.372	14.846	5.008	17.324	3.11	9.925	0.529	6.13	7.192	3.316	3.71	1.984
231051	Kmt2c	4.75581	1	phase-specific TFs	0.409	0	0	0.086	0.0102029	0.14	1.375	0.936	0	0	0	0	0	0	0	0	0	0	0	0	0	0	0	0	0	0	0	0	0	0	0	0	0	0	0	0	0	0	0	0	0.735	0	0.303	0	0
16478	Jund	Inf	1	phase-specific TFs	5.144	0	0	0	0.00942519	21.252	9.614	0	0	0	0	0	0	0	0	0	0	0	0	0	0	0	0	0	0	0	0	0	0	0	0	0	0	0	0	0	0	0	0	0	0	0	0	0	0
16363	Irf2	1.68781	1	phase-specific TFs	275.926	163.482	101.586	144.497	0.00935321	561.594	308.799	324.026	107.822	188.622	164.691	174.294	191.573	279.654	71.075	179.234	117.184	157.775	239.483	216.423	118.996	178.984	239.051	211.956	150.574	106.299	125.781	107.136	77.212	87.486	48.286	60.886	104.361	69.836	172.575	218.931	50.329	117.585	0	150.501	0	136.15	190.121	317.909	117.343
56809	Gmeb1	5.08757	1	phase-specific TFs	2.905	0.571	0	0	0.00925335	0	0	0	3.125	7.454	6.853	0	0	0	0	0	0	0	0	0	0	4.623	5.658	0	0	0	0	0	0	0	0	0	0	0	0	0	0	0	0	0	0	0	0	0	0
94246	Arid4b	Inf	1	phase-specific TFs	0.63	0	0	0	0.00860803	2.561	1.221	0	0	0	0	0	0	0	0	0	0	0	0	0	0	0	0	0	0	0	0	0	0	0	0	0	0	0	0	0	0	0	0	0	0	0	0	0	0
229004	Gmeb2	Inf	1	phase-specific TFs	2.174	0	0	0	0.00820115	0	0	0	4.295	0	8.75	0	0	0	0	0	0	0	0	0	0	0	0	0	0	0	0	0	0	0	0	0	0	0	0	0	0	0	0	0	0	0	0	0	0
116870	Mta1	1.54057	1	phase-specific TFs	7.689	1.366	1.022	4.991	0.00699765	5.753	11.238	17.712	5.697	2.556	3.18	3.429	2.489	0	1.493	0	2.188	0	0	0	0	0	0	12.959	2.028	0	0	0	0	0	0	0	0	4.091	4.083	0	0	5.848	6.182	0	2.503	13.419	11.463	14.574	2.521
16969	Zbtb7a	3.11634	1	phase-specific TFs	22.715	7.289	0	0.977	0.00676315	8.924	16.125	9.579	12.61	35.023	54.031	55.318	37.582	0	22.847	0	15.448	0	0	0	0	0	0	0	0	0	0	0	0	0	0	0	0	0	0	0	0	0	0	0	0	0	0	0	4.968
17095	Lyl1	7.97327	1	phase-specific TFs	22.668	2.843	0	0	0.00605763	17.399	15.969	0	12.665	0	89.978	0	0	0	14.828	0	3.672	8.457	13.076	11.145	0	0	0	0	0	0	0	0	0	0	0	0	0	0	0	0	0	0	0	0	0	0	0	0	0
54006	Deaf1	Inf	1	phase-specific TFs	3.236	0	0	0	0.00604738	0	7.241	12.175	0	0	0	0	0	0	0	0	0	0	0	0	0	0	0	0	0	0	0	0	0	0	0	0	0	0	0	0	0	0	0	0	0	0	0	0	0
246086	Onecut3	Inf	1	phase-specific TFs	3.976	0	0	0	0.00543853	9.268	0	14.586	0	0	0	0	0	0	0	0	0	0	0	0	0	0	0	0	0	0	0	0	0	0	0	0	0	0	0	0	0	0	0	0	0	0	0	0	0
18109	Mycn	Inf	1	phase-specific TFs	3.35	0	0	0	0.00493546	0	8.161	11.939	0	0	0	0	0	0	0	0	0	0	0	0	0	0	0	0	0	0	0	0	0	0	0	0	0	0	0	0	0	0	0	0	0	0	0	0	0
67210	Gatad1	Inf	1	phase-specific TFs	1.14	0	0	0	0.00491771	0	4.064	2.776	0	0	0	0	0	0	0	0	0	0	0	0	0	0	0	0	0	0	0	0	0	0	0	0	0	0	0	0	0	0	0	0	0	0	0	0	0
214812	Zfp609	Inf	1	phase-specific TFs	0.544	0	0	0	0.00452924	1.881	0	1.382	0	0	0	0	0	0	0	0	0	0	0	0	0	0	0	0	0	0	0	0	0	0	0	0	0	0	0	0	0	0	0	0	0	0	0	0	0
[truncated: 190 more rows]
[truncated: 4 more columns]

## Sheet: ReadMe
Supplementary Table S6. Number of TFs with different confident levels by stepwise filtering criteria
[truncated: 5 more rows]
