# Supplementary material for: A time-resolved multi-omic atlas of the developing mouse liver
Source: HighWire-hosted journal article supplement (doi:10.1101/gr.253328.119), 2020-02-01
Supplement: Supplemental_Table_S5.xlsx [file Supplemental_Table_S5.xlsx]

## Sheet: Sheet1
Gene.ID	GeneSymbol	Cluster1	Cluster2	Cluster3	Ratio	specific phase	specificity	FDR	E12.5.1.Exp018736	E12.5.2.Exp018737	E12.5.3.Exp018738	E13.5.1.Exp018739	E13.5.2.Exp018740	E13.5.3.Exp018741	E14.5.1.Exp018742	E14.5.2.Exp018743	E14.5.3.Exp018744	E15.5.1.Exp018745	E15.5.2.Exp018746	E15.5.3.Exp018747	E16.5.1.Exp018748	E16.5.2.Exp018749	E16.5.3.Exp018750	E17.5.1.Exp018751	E17.5.2.Exp018752	E17.5.3.Exp018753	E18.5.1.Exp018754	E18.5.2.Exp018755	E18.5.3.Exp018756	D1.1.Exp018757	D1.2.Exp018758	D1.3.Exp018759	D3.1.Exp018760	D3.2.Exp018761	D3.3.Exp018762	D5.1.Exp018763	D5.2.Exp018764	D5.3.Exp018765	W1.1.Exp018766	W1.2.Exp018767	W1.3.Exp018768	W2.1.Exp018769	W2.2.Exp018770	W2.3.Exp018771	W3.1.Exp018772	W3.2.Exp018773	W3.3.Exp018774	W6.1.Exp018775	W6.2.Exp018776
14766	Adgrg1	0.01	0	0	Inf	1	Cluster Enriched	0.0163004	0.03	0.05	0.02	0.03	0	0.07	0	0	0	0	0	0	0	0	0	0	0	0	0	0	0	0	0	0	0	0	0	0	0	0	0	0	0	0	0	0	0	0	0	0	0
232906	Arhgap35	0	0.02	0.06	3	3	Cluster Enriched	0.085076	0	0	0	0	0	0	0	0	0	0	0	0	0	0	0	0.06	0.01	0.1	0.01	0.01	0	0	0.01	0.01	0.02	0.01	0.01	0.03	0.06	0.01	0.01	0.02	0.03	0.49	0.14	0.05	0.04	0.01	0.01	0.06	0.02
66138	Bud23	0.29	0	0	Inf	1	Cluster Enriched	0.00100257	0.9	1.04	0	0.26	0.32	0.12	0.74	0	0.68	0.08	0.25	0	0	0	0	0	0	0	0	0	0	0	0	0	0	0	0	0	0	0	0	0	0	0	0	0	0	0	0	0	0
12654	Chil1	0	0.04	0	Inf	2	Cluster Enriched	0.00177815	0	0	0	0	0	0	0	0.02	0.01	0	0	0	0	0	0	0	0.07	0.15	0.06	0.12	0.09	0	0	0	0	0	0	0	0	0	0	0	0	0	0	0	0	0	0	0	0
58184	Cnot9	0.65	0.44	0.7	1.07692			0.572817	0.26	1.22	0.86	1.24	1.03	1.12	0.28	0.59	1.47	0.11	0.26	0.16	0.15	0.77	0.24	0.99	0.13	0.41	0.98	0	0.27	0	0.28	0.12	0.28	1.64	0.24	1.33	1.16	0.08	0.14	1.44	0.59	1.35	2.66	0.26	0	0.55	2.06	0	0
13367	Diaph1	0.33	0.5	0.46	1.08696			0.109692	0.14	0.31	0.38	0.35	0.41	0.37	0.3	0.27	0.26	0.42	0.22	0.31	0.39	0.22	0.57	0.22	0.37	0.76	0.29	0.74	0.95	0.32	0.46	0.28	0.73	0.35	0.53	0.69	0.38	0.47	0.57	0.48	0.7	0.5	0.42	0.22	0.49	0.52	0.49	0.22	1.17
56419	Diaph3	2.68	0	0	Inf	1	Cluster Enriched	0.0615536	0	0.02	0.05	0.03	13.22	0.02	0.04	13.45	13.36	0	0	0	0.04	0.03	0	0	0	0	0	0	0	0	0	0	0	0	0	0	0	0	0	0	0	0	0	0	0	0	0	0	0
71449	Eef1aknmt	0.1	0.09	0.12	1.2			0.919167	0.29	0.08	0.13	0.08	0.12	0.12	0.08	0.11	0.13	0.08	0.06	0.08	0.05	0.05	0.02	0.05	0.22	0.15	0.18	0.02	0.14	0	0.06	0.03	0.12	0.06	0.05	0.02	0.06	0.09	0.04	0.03	0.08	0.76	0.02	0.83	0.03	0.04	0.01	0	0
70617	Fam241a	0.08	0	0	Inf	1	Cluster Enriched	0.000378622	0	0.06	0.12	0.19	0	0.07	0.29	0.08	0	0.05	0.1	0.17	0	0	0	0	0	0	0	0	0	0	0	0	0	0	0	0	0	0	0	0	0	0	0	0	0	0	0	0	0
60596	Gucy1a1	0.03	0.11	0.18	3.66667			0.0396242	0.03	0.02	0.15	0.04	0.01	0	0.04	0.03	0.02	0	0.01	0.01	0.03	0.01	0.02	0.01	0.05	0.22	0	0.03	0.05	0.08	0.07	0.06	0.17	0.42	0.12	0.18	0.14	0.51	0.27	0.15	0.39	0.8	0.14	0.33	0.03	0.19	0.07	0	0
54195	Gucy1b1	0.05	0.18	0.2	3.6			0.0309202	0.1	0.15	0.02	0.01	0.03	0.14	0.01	0.02	0.04	0	0.09	0.02	0	0.04	0.06	0	0.28	0.04	0.1	0.11	0.08	0.1	0.6	0.14	0.23	0.18	0.27	0.19	0.44	0.59	0.3	0.15	0.66	0.18	0.19	0.15	0.25	0.08	0.23	0.02	0.06
29877	Hdgfl3	0	0	0.07	Inf	3	Cluster Enriched	0.267329	0	0	0	0	0	0	0	0	0	0	0	0	0	0	0	0	0	0	0	0	0	0	0	0	0	0	0	0	0	0	0	0	0	0	0	0	0	0	0	0	0
239217	Kctd12	0.62	1.49	1.47	2.37097			0.02729	0.56	0.26	0.6	0.31	0.37	0.39	0.34	0.82	0.71	1.06	0.53	0.88	0.82	0.35	1.25	1.57	0.94	1.1	1.18	1.17	0.92	1.14	1.12	0.94	3.76	2.44	1.65	2.21	2.64	2.57	2.53	4.48	2.88	1.7	1.41	1.39	1.32	0.72	0.8	0.88	0.23
232811	Kmt5c	0.01	0	0	Inf	1	Cluster Enriched	0.0003931	0.05	0.03	0	0	0.02	0.02	0	0	0	0.02	0	0.01	0.02	0.03	0	0	0	0	0	0	0	0	0	0	0	0	0	0	0	0	0	0	0	0	0	0	0	0	0	0	0
235461	Mindy2	0.01	0	0	Inf	1	Cluster Enriched	0.349759	0	0	0	0	0	0	0	0.1	0.01	0	0	0	0	0	0	0	0	0	0	0	0	0	0	0	0	0	0	0	0	0	0	0	0	0	0	0	0	0	0	0	0
223646	Naprt	0.27	1.2	3.81	3.175	3	Cluster Enriched	4.26e-07	0.05	0.03	0.06	0.18	0.24	0.53	0.4	0.27	0.25	0.16	0.26	0.36	0.18	0.26	0.79	0.39	0.24	0.81	0.77	1.09	1.33	0.75	1.34	0.64	1.65	2.58	2.84	1.04	2.89	1.68	1.91	2.9	2.58	3.85	10.37	4.28	3.4	7.92	3.79	2.87	4.11
68026	Pclaf	0.52	0.1	0	5.2	1	Cluster Enriched	0.000673102	1.94	0.19	0.36	0.37	0.57	0.36	1.42	0	0.13	0.16	0.45	0.56	0.84	0.31	0.13	0.13	1.04	0	0	0	0	0	0	0	0	0	0	0	0	0	0	0	0	0	0	0	0	0	0	0	0
338368	Pheta2	0.03	0	0	Inf	1	Cluster Enriched	0.174159	0	0	0	0	0.22	0.23	0	0	0	0	0	0	0	0	0	0	0	0	0	0	0	0	0	0	0	0	0	0	0	0	0	0	0	0	0	0	0	0	0	0	0
106248	Qtrt2	0.01	0	0	Inf	1	Cluster Enriched	0.236069	0	0	0	0.08	0.04	0.09	0	0	0	0	0	0	0	0	0	0	0	0	0	0	0	0	0	0	0	0	0	0	0	0	0	0	0	0.05	0	0.04	0	0	0	0	0
14694	Rack1	65.83	78.69	77.11	1.02049			0.264517	74.77	52.31	111.67	61	73.24	68.58	48.61	65.07	81.58	53.65	48.22	82.53	50.7	43.71	71.82	52.15	48.7	73.61	50.3	52.31	107.56	54.29	94.87	93.3	81.18	115.77	120.3	90.64	78.36	92.36	94.6	102.84	88.71	102.48	73.38	71.13	74.68	92.29	99.35	67.01	54.29
71952	Riox1	0.1	0.15	0	Inf			0.0171972	0.22	0.13	0.01	0.05	0.11	0.35	0.13	0.05	0.07	0.06	0.05	0.17	0.04	0.05	0.06	0.13	0.08	0.04	0.03	0.02	0.02	0	0.08	0.06	0.15	0.37	0.83	0	0	0	0	0	0	0	0	0	0	0	0	0	0
72657	Selenoh	1.38	0.36	0.16	3.83333	1	Cluster Enriched	0.00220324	0.98	0.68	5.13	0.61	0	2.84	3.36	1.74	1.4	0	0.77	0.89	1.13	0.24	0.86	0.55	0	1.14	0	0	0	0.4	0	0.17	1.1	0.39	0.51	0	0	0	0	0	0	1.48	1.4	0	0	0	0	0	0
70415	Stk26	0.33	0.22	0.13	1.69231			0.0420667	0.41	0.33	0.74	0.33	0.3	0.29	0.41	0.35	0.2	0	0.27	0.19	0.53	0.27	0.3	0	0.53	0.3	0.32	0.31	0.17	0	0.24	0.11	0.2	0.37	0.12	0.91	0	0.5	0.4	0.22	0.26	0	0	0	0	0	0	0	0
74152	Stra6l	0	0	0.04	Inf	3	Cluster Enriched	0.00118311	0	0	0	0	0	0	0	0	0	0	0	0	0	0	0	0	0	0	0	0	0	0	0	0	0	0	0	0	0	0	0	0	0	0.03	0.04	0	0.16	0.11	0.1	0.04	0
22230	Ufd1	0.48	0.52	0.88	1.69231			9.89e-06	0.8	0.38	0.43	0.55	0.36	0.83	0.32	0.55	0.48	0.21	0.37	0.49	0.6	0.42	0.34	0.44	0.25	0.72	0.37	0.68	0.36	0.42	0.52	0.61	0.55	0.51	0.86	0.69	0.52	1.16	1.18	0.69	1.01	1.07	0.46	0.84	0.81	1.21	1.12	0.82	0.66
21771	Utp4	0.18	0.14	0.03	4.66667			0.0667202	0.11	0.28	0.4	0.29	0.33	0.3	0.21	0.04	0.08	0	0.19	0.09	0.09	0.22	0	0.06	0.09	0.2	0	0	0	0	0.75	0.11	0	0.5	0.03	0	0	0	0	0.53	0.08	0	0	0	0	0	0	0	0
72357	2210016L21Rik	0.04	0	0	Inf	1	Cluster Enriched	0.00295027	0.11	0	0.16	0.11	0.13	0.09	0	0	0	0	0	0	0	0.02	0.02	0	0	0	0	0	0	0	0	0	0	0	0	0	0	0	0	0	0	0	0	0	0	0	0	0	0
73212	3110082I17Rik	0.04	0	0	Inf	1	Cluster Enriched	0.03948	0.03	0	0.25	0.04	0.14	0.13	0	0	0	0	0	0	0	0	0	0	0	0	0	0	0	0	0	0	0	0	0	0	0	0	0	0	0	0	0	0	0	0	0	0	0
227290	Aamp	0.77	0.36	0.22	2.13889	1	Cluster Enriched	1.25e-05	0.88	1.23	0.84	1.12	0.96	1.5	0.41	0.3	0.2	0.74	0.83	0.8	1	0.29	0.38	0.33	0.22	0.31	0.25	0.31	0.32	0.45	0.38	0.38	0.64	0.25	0.42	0.43	0.25	0.61	0.43	0.72	0.31	0.18	0.11	0.06	0.3	0.05	0.36	0.17	0
56199	Abcb10	0.9	0.36	0.21	2.5	1	Cluster Enriched	4.37e-07	0.73	0.83	1.15	0.84	0.81	1.26	1.17	1.1	0.97	0.61	0.92	0.48	1.09	1.06	0.43	0.74	0.51	0.25	0.21	0.37	0.41	0.16	0.4	0.16	0.19	0.33	0.63	1.58	0.14	0.31	0.18	0.08	0.14	0.2	0.02	0.02	0.02	0.02	0.03	0.25	0.06
170812	Ahsp	30.26	11.97	0.36	2.52799	1	Cluster Enriched	1.58e-12	23.18	21.36	23.97	24.86	32.69	39.39	46.9	32.94	35.32	26.48	20.69	38.59	19.93	21.6	46.03	23.18	15.53	35.15	10	14.24	13.63	7.54	6.51	4.59	5.35	5.68	2.23	0	2.28	4.19	0	0	0	0	0	0	0	0	0	0	0
68420	Ankrd13a	0.43	0.17	0	2.52941	1	Cluster Enriched	0.000729267	0.53	0.09	0.04	0.75	0.34	0.13	0.62	1.14	1.28	0.04	0.07	0.07	0.1	0.6	0.62	0.01	0.53	0.04	0	0.16	0.09	0.01	0.87	0.01	0.22	0.03	0.03	0	0	0	0	0	0	0	0	0	0	0	0	0	0
14025	Bcl11a	0.06	0	0	Inf	1	Cluster Enriched	0.00152749	0.08	0.31	0.12	0.09	0.07	0	0.13	0	0.04	0	0	0	0.11	0.02	0	0	0	0	0	0	0	0	0	0	0	0	0	0	0	0	0	0	0	0	0	0	0	0	0	0	0
19716	Bex1	0.32	0	0	Inf	1	Cluster Enriched	0.0512813	0	0	0	0	1.82	0.22	0	1.25	1.45	0	0	0	0	0	0	0	0	0	0	0	0	0	0	0	0	0	0	0	0	0	0	0	0	0	0	0	0	0	0	0	0
12229	Btk	0.15	0.06	0.01	2.5	1	Cluster Enriched	0.000344115	0.12	0.29	0.46	0.15	0.27	0.22	0.12	0.07	0.07	0.04	0.08	0.07	0.08	0.12	0.05	0.04	0.04	0.07	0.34	0.06	0.03	0.01	0.03	0.02	0.09	0	0.05	0.1	0.04	0.02	0	0	0	0	0	0	0	0	0	0	0
12301	Cacybp	10.14	4.24	2.34	2.39151	1	Cluster Enriched	3.07e-07	13.23	20.76	16.89	11.15	7.73	6.96	10.52	4.25	5.09	4.13	12.68	8.79	13.02	13.14	3.72	2.63	9.77	4.87	4.2	3.8	2.33	3.58	5.8	1.31	4.31	5.47	2.86	2.04	1.72	3	3.83	4.51	2.24	2.77	0.76	2.56	2	4.43	3.16	1.01	1.4
12490	Cd34	0.01	0	0	Inf	1	Cluster Enriched	0.3314	0	0	0	0.02	0.15	0	0	0	0	0	0	0	0	0	0	0	0	0	0	0	0	0	0	0	0	0	0	0	0	0	0	0	0	0	0	0	0	0	0	0	0
68968	Cdan1	0.04	0	0	Inf	1	Cluster Enriched	0.0130854	0.14	0.06	0.02	0.03	0	0.04	0.02	0.01	0.24	0.02	0.02	0.02	0	0	0	0.02	0.01	0	0	0	0	0	0	0	0	0	0	0	0	0	0	0	0	0	0	0	0	0	0	0	0
14793	Cdca3	0.01	0	0	Inf	1	Cluster Enriched	0.291288	0	0	0	0	0.03	0.14	0	0	0	0	0	0	0	0	0	0	0	0	0	0	0	0	0	0	0	0	0	0	0	0	0	0	0	0	0	0	0	0	0	0	0
12607	Cebpz	0.11	0.04	0	2.75	1	Cluster Enriched	3e-08	0.15	0.13	0.1	0.19	0.18	0.17	0.21	0.04	0.06	0.05	0.08	0.09	0.07	0.07	0.03	0.06	0.02	0.01	0.02	0.04	0	0	0.06	0.02	0.06	0.11	0.04	0.02	0.02	0	0	0	0	0	0	0	0	0	0	0	0
106143	Cggbp1	0.39	0.13	0.02	3	1	Cluster Enriched	8.1e-06	0.9	0.3	0.42	0.3	0.39	0.42	0.12	0.17	0.18	0.32	0.18	0.31	0.26	1.14	0.4	0.23	0.2	0.36	0	0.19	0.14	0	0	0	0	0.06	0.34	0	0	0	0	0	0	0	0	0	0.17	0.1	0	0	0
56760	Clec1b	0.1	0	0	Inf	1	Cluster Enriched	0.283189	0	0	0	0	0	0	0	0	0	0	0	0	0	0.27	1.16	0	0	0	0	0	0	0	0	0	0	0	0	0	0	0	0	0	0	0	0	0	0	0	0	0	0
12729	Clns1a	0.87	0.12	0.08	7.25	1	Cluster Enriched	0.0063266	0.67	0.22	4.59	0.6	1.67	0.86	0.24	0.95	0.63	0.4	0.1	0.63	0.5	0.24	0.79	0	0	0	0	0	0	0	0.26	1.22	0	0	0	0	0.21	0.64	0	0	0	0	0	0	0	0	0	0	0
67579	Cpeb4	0.07	0.02	0.02	3.5	1	Cluster Enriched	0.0187756	0.1	0.1	0.08	0.06	0.08	0.14	0.05	0.04	0.06	0.08	0.04	0.08	0.08	0.05	0.03	0.05	0.06	0.02	0	0	0	0.04	0.02	0	0.06	0	0.04	0	0	0	0.04	0	0.3	0	0	0	0	0	0	0	0
54394	Crlf3	0.83	0.39	0.13	2.12821	1	Cluster Enriched	1.09e-09	0.88	0.53	1.68	0.83	0.82	1	0.95	0.85	0.85	0.72	0.77	0.98	0.49	0.5	0.64	0.19	0.5	0.55	0.56	0.27	0.67	0.31	0.46	0.2	0.18	0.57	0.22	0	0.4	0.3	0.23	0.58	0.09	0.33	0.1	0	0	0	0	0	0.19
66515	Cul7	0.04	0.01	0	4	1	Cluster Enriched	0.00372074	0.22	0.06	0.03	0.03	0.04	0.06	0.04	0.02	0.02	0.02	0.03	0.02	0.04	0.02	0.02	0.02	0.03	0.03	0	0	0	0	0	0	0	0.01	0.01	0.01	0.07	0	0	0	0	0	0	0	0	0	0	0	0
54151	Cyhr1	0.01	0	0	Inf	1	Cluster Enriched	0.17488	0	0	0	0	0	0	0	0	0	0.04	0.04	0	0	0	0	0	0	0	0	0	0	0	0	0	0	0	0	0	0	0	0	0	0	0	0	0	0	0	0	0	0
19158	Cyth2	0.02	0	0	Inf	1	Cluster Enriched	0.0076905	0	0.04	0.02	0	0.08	0.08	0	0.08	0.02	0	0	0	0	0	0	0	0	0	0	0	0	0	0	0	0	0	0	0	0	0	0	0	0	0	0	0	0	0	0	0	0
320685	Dctd	0.01	0	0	Inf	1	Cluster Enriched	0.326252	0	0	0	0.01	0.07	0	0	0	0	0	0	0	0	0	0	0	0	0	0	0	0	0	0	0	0	0	0	0	0	0	0	0	0	0	0	0	0	0	0	0	0
77591	Ddx10	0.21	0	0	Inf	1	Cluster Enriched	0.011807	0.75	0.23	0.62	0.02	0.97	0.01	0	0	0	0	0.01	0.5	0	0	0	0	0	0	0	0	0	0	0	0	0	0	0	0	0	0	0	0	0	0	0	0	0	0	0	0	0
56200	Ddx21	3.32	1.45	0.56	2.28966	1	Cluster Enriched	6.61e-07	5.52	6.31	4.24	7.56	3.37	2.45	4.5	1.77	1.89	1.82	1.94	1.68	2.6	2.56	1.58	1.95	1.1	2.05	0.69	1.5	0.83	0.67	1.71	1	2.23	2.08	1.55	1.03	1.03	0.67	1	0.72	0.74	0.38	0.87	0.3	0.41	0.54	0.74	0.28	0.31
58233	Dnaja4	0.08	0	0	Inf	1	Cluster Enriched	0.00177036	0.25	0.37	0.1	0	0	0	0	0.05	0.04	0.17	0.08	0	0.16	0.04	0	0	0	0	0	0	0	0	0	0	0	0	0	0	0	0	0	0	0	0	0	0	0	0	0	0	0
99480	Dnttip2	0.56	0.1	0	5.6	1	Cluster Enriched	0.0294117	0.31	0.23	3.51	1.48	0.23	0.15	0.04	1.27	0.57	0.07	0.07	0.11	0.05	0.16	0.09	0.08	0.73	0.15	0.02	0.05	0.07	0	0	0	0.04	0.05	0.07	0	0	0	0	0	0	0	0	0	0	0	0	0	0
66310	Dpy30	1.87	0.91	0.45	2.05495	1	Cluster Enriched	0.0622611	3.35	0.13	3.04	0	0.54	2.54	0.28	2.78	1.49	0.22	0.04	6.57	0.28	0.03	6.71	1.66	0.12	4.6	0	0	0	0.13	0.4	2.02	0.7	0	1.31	0	0	0	0	0.41	1.81	0.12	0	1.71	1.03	0.61	0.92	0	0.11
54325	Elovl1	0.05	0.02	0.01	2.5	1	Cluster Enriched	0.00104435	0.04	0.1	0.01	0	0.05	0.06	0	0.05	0.03	0.03	0.07	0.05	0.15	0.07	0.1	0.06	0.07	0	0	0	0	0.03	0	0.03	0	0	0	0	0.06	0.09	0	0	0	0	0	0	0	0	0	0	0
56205	Ensa	0.35	0	0	Inf	1	Cluster Enriched	0.00150713	0.69	0.47	1.65	0	0.87	0.24	0.46	0.38	0	0	0	0	0	0.32	0.18	0	0	0	0	0	0	0	0	0	0	0	0	0	0	0	0	0	0	0	0	0	0	0	0	0	0
67276	Eri1	0.11	0	0	Inf	1	Cluster Enriched	0.000489713	0.15	0.08	0.08	0.36	0.19	0.18	0.39	0	0.05	0	0	0	0.06	0.07	0	0	0	0	0	0	0	0	0	0	0	0	0	0	0	0	0	0	0	0	0	0	0	0	0	0	0
27028	Ermap	0.06	0	0	Inf	1	Cluster Enriched	2.94e-05	0	0	0	0.18	0.13	0.03	0.16	0.06	0.05	0.03	0.06	0.06	0.04	0.12	0	0	0	0	0	0	0	0	0	0	0	0	0	0	0	0	0	0	0	0	0	0	0	0	0	0	0
14011	Etv6	0.01	0	0	Inf	1	Cluster Enriched	0.0354654	0	0	0	0	0.01	0.03	0	0	0	0.02	0	0.03	0	0	0	0	0	0	0	0	0	0	0	0	0	0	0	0	0	0	0	0	0	0	0	0	0	0	0	0	0
109229	Fam118b	0.01	0	0	Inf	1	Cluster Enriched	0.0472634	0	0	0	0.01	0	0.04	0	0.02	0.04	0	0	0	0	0	0	0	0	0	0	0	0	0	0	0	0	0	0	0	0	0	0	0	0	0	0	0	0	0	0	0	0
14391	Gabpb1	0.05	0	0	Inf	1	Cluster Enriched	0.00895993	0.15	0.21	0	0.03	0	0.13	0	0	0	0	0	0	0.18	0.04	0	0	0	0	0	0	0	0	0	0	0	0	0	0	0	0	0	0	0	0	0	0	0	0	0	0	0
14460	Gata1	0.61	0.04	0	15.25	1	Cluster Enriched	5.67e-11	0.68	0.91	1.25	0.93	0.69	0.5	0.86	0.42	0.44	0.55	0.51	0	0.51	0.66	0.28	0.15	0.36	0.02	0	0	0	0	0	0	0	0	0	0	0	0	0	0	0	0	0	0	0	0	0	0	0
56209	Gde1	0.01	0	0	Inf	1	Cluster Enriched	0.36372	0	0.13	0.01	0	0	0	0	0	0	0	0	0	0	0	0	0	0	0	0	0	0	0	0	0	0	0	0	0	0	0	0	0	0	0	0	0	0	0	0	0	0
67242	Gemin6	0.1	0	0	Inf	1	Cluster Enriched	2.14e-05	0.06	0	0.26	0.13	0.25	0.21	0.19	0.09	0.11	0	0.07	0.1	0	0	0	0	0	0	0	0	0	0	0	0	0	0	0	0	0	0	0	0	0	0	0	0	0	0	0	0	0
14582	Gfi1b	0.01	0	0	Inf	1	Cluster Enriched	0.0970282	0	0	0	0.06	0.05	0.02	0	0	0	0	0	0	0	0	0	0	0	0	0	0	0	0	0	0	0	0	0	0	0	0	0	0	0	0	0	0	0	0	0	0	0
98488	Gtf3c3	0.08	0.03	0.02	2.66667	1	Cluster Enriched	0.07504	0.16	0.01	0.04	0.03	0.09	0.04	0.03	0.04	0.05	0.04	0.04	0.07	0.04	0.03	0.44	0.03	0.01	0.09	0.05	0.04	0.06	0	0.01	0.05	0.02	0.02	0.03	0.01	0	0.05	0	0.06	0.05	0.06	0.02	0.02	0.01	0	0.06	0	0
69237	Gtpbp4	0.47	0.16	0.02	2.9375	1	Cluster Enriched	0.0175697	0.17	2.77	0.23	0.63	0.26	0.38	0.47	0.09	0.2	0.05	0.18	0.9	0.2	0.4	0.11	0.06	0.16	0.11	0.03	0.13	0.08	0.07	0.25	0.05	0.25	0.52	0.22	0.06	0.08	0.08	0.08	0.06	0.03	0	0	0	0	0	0	0	0
67933	Hcfc2	0.01	0	0	Inf	1	Cluster Enriched	0.224474	0	0	0	0	0	0	0	0	0	0	0	0	0	0.05	0.12	0	0	0	0	0	0	0	0	0	0	0	0	0	0	0	0	0	0	0	0	0	0	0	0	0	0
93966	Hemgn	12.17	2.93	0.11	4.15358	1	Cluster Enriched	8.4e-13	12.84	12.03	19.33	7.43	19.24	17	11.87	15.13	17.41	8.88	6.5	10.79	8.87	8.9	6.36	8.89	4.81	4.36	2.94	2.13	5.43	2.24	1.66	1.25	0.35	0.93	0.22	0.41	1.1	0.31	0.13	0	0.06	0	0	0	0	0	0	0	0
72630	Hspa12b	0.06	0	0	Inf	1	Cluster Enriched	0.181203	0.05	0.06	0.67	0	0.05	0.04	0	0	0	0	0	0	0.05	0.03	0	0	0	0	0	0	0	0	0	0	0	0	0	0	0	0	0	0	0	0	0	0	0	0	0	0	0
78369	Icam4	0.02	0	0	Inf	1	Cluster Enriched	0.265173	0	0	0	0	0	0	0.28	0.08	0	0	0	0	0	0	0	0	0	0	0	0	0	0	0	0	0	0	0	0	0	0	0	0	0	0	0	0	0	0	0	0	0
27993	Imp4	0.15	0	0	Inf	1	Cluster Enriched	6.74e-05	0.2	0.28	0.1	0.49	0.08	0.25	0	0	0	0.05	0.18	0.07	0.45	0.17	0	0	0	0	0	0	0	0	0	0	0	0	0	0	0	0	0	0	0	0	0	0	0	0	0	0	0
76582	Ipo11	0.22	0.07	0.02	3.14286	1	Cluster Enriched	5.82e-06	0.23	0.17	0.27	0.34	0.42	0.3	0.33	0.2	0.19	0.08	0.1	0.2	0.23	0.1	0.11	0.05	0.05	0.08	0	0.42	0.07	0	0.1	0.04	0	0	0	0.3	0.02	0	0	0	0	0	0	0	0	0	0	0	0
404710	Iqgap3	0.01	0	0	Inf	1	Cluster Enriched	0.156299	0	0	0	0.01	0.01	0.02	0.01	0.01	0.01	0	0.01	0.01	0.01	0.02	0.02	0	0	0	0	0	0	0	0	0	0	0	0	0	0	0	0	0	0	0.01	0.07	0	0	0	0	0	0
229504	Isg20l2	0.02	0	0	Inf	1	Cluster Enriched	0.0441913	0	0.16	0.05	0.09	0	0.07	0	0	0	0	0	0	0	0	0	0	0	0	0	0	0	0	0	0	0	0	0	0	0	0	0	0	0	0	0	0	0	0	0	0	0
71819	Kif23	0.07	0	0	Inf	1	Cluster Enriched	7.98e-08	0.2	0.11	0.09	0.06	0.07	0.05	0.1	0.06	0.04	0.01	0.03	0.04	0.1	0.03	0.02	0	0	0	0	0	0	0	0	0	0	0	0	0	0	0	0	0	0	0	0	0	0	0	0	0	0
16571	Kif4	0.31	0.08	0	3.875	1	Cluster Enriched	9.98e-11	0.28	0.36	0.43	0.73	0.34	0.25	0.36	0.2	0.17	0.32	0.29	0.23	0.36	0.25	0.13	0.22	0.13	0.15	0.06	0.04	0.07	0.2	0.01	0.02	0.01	0.01	0.04	0	0	0	0	0	0	0	0	0	0	0	0	0	0
16590	Kit	0.03	0.01	0	3	1	Cluster Enriched	0.000503159	0.03	0	0.03	0.01	0.03	0	0	0.05	0.01	0.03	0.06	0.07	0.03	0.08	0.01	0.02	0	0.02	0	0	0	0.01	0	0.01	0.04	0	0.02	0	0	0	0	0.01	0.02	0	0	0	0	0	0	0	0
16596	Klf1	0.02	0	0	Inf	1	Cluster Enriched	0.282946	0.3	0	0.07	0	0	0	0	0	0	0	0	0	0	0	0	0	0	0	0	0	0	0	0	0	0	0	0	0	0	0	0	0	0	0	0	0	0	0	0	0	0
50794	Klf13	0.03	0	0	Inf	1	Cluster Enriched	0.189537	0	0	0	0	0	0	0	0.24	0.15	0	0	0	0	0	0	0	0	0	0	0	0	0	0	0	0	0	0	0	0	0	0	0	0	0	0	0	0	0	0	0	0
16909	Lmo2	0.05	0	0	Inf	1	Cluster Enriched	0.0135761	0.13	0	0.25	0.23	0.1	0.1	0	0	0	0	0	0	0	0	0	0	0	0	0	0	0	0	0	0	0	0	0	0	0	0	0	0	0	0	0	0	0	0	0	0	0
210992	Lpcat1	0.22	0.05	0	4.4	1	Cluster Enriched	1.76e-08	0.11	0.44	0.21	0.24	0.3	0.22	0.27	0.14	0.11	0.2	0.24	0.03	0.33	0.38	0.06	0.24	0.09	0.12	0.13	0	0.07	0	0	0	0	0	0	0	0	0	0	0	0	0	0	0	0	0	0	0	0
17089	Lyar	0.38	0.04	0	9.5	1	Cluster Enriched	0.00113904	0.83	1.27	1.14	1.1	0.24	0.24	0.33	0	0.06	0.09	0.08	0	0.08	0.25	0	0.08	0	0.13	0.07	0.1	0	0	0	0	0	0.1	0.04	0	0	0	0	0	0	0	0	0	0	0	0	0	0
171170	Mbnl3	0.37	0.07	0	5.28571	1	Cluster Enriched	3.03e-06	0.47	0.6	0	0.69	0.25	0.2	0.47	0	0.16	0.45	0.52	0.72	0.81	0	0.25	0	0.46	0.15	0.18	0	0.07	0	0	0	0	0	0	0	0	0	0	0	0	0	0	0	0	0	0	0	0
66405	Mcts2	0.09	0	0	Inf	1	Cluster Enriched	0.000579943	0.35	0.25	0.18	0.12	0.14	0.21	0.08	0.04	0.03	0	0	0	0	0	0	0	0	0	0	0	0	0	0	0	0	0	0	0	0	0	0	0	0	0	0	0	0	0	0	0	0
17268	Meis1	0.01	0	0	Inf	1	Cluster Enriched	0.276957	0	0.02	0.08	0	0	0	0	0	0	0	0	0	0	0	0	0	0	0	0	0	0	0	0	0	0	0	0	0	0	0	0	0	0	0	0	0	0	0	0	0	0
74522	Morc2a	0.03	0	0	Inf	1	Cluster Enriched	0.0799924	0.01	0.04	0.23	0.05	0.04	0.04	0	0	0	0	0	0	0	0	0	0	0	0	0	0	0	0	0	0	0	0	0	0	0	0	0	0	0	0	0	0	0	0	0	0	0
17685	Msh2	0.72	0.3	0.15	2.4	1	Cluster Enriched	5.19e-07	1.05	0.42	1.77	0.52	0.76	1.08	0.52	0.39	0.6	0.63	0.49	0.72	0.93	0.59	0.31	0.38	0.32	0.55	0.26	0.19	0.42	0.15	0.4	0.2	0.25	0.31	0.17	0.12	0.19	0.28	0.43	0.26	0.25	0.28	0.15	0.26	0.05	0.13	0.13	0.01	0.01
17765	Mtf2	0.04	0	0	Inf	1	Cluster Enriched	0.0177526	0.03	0.18	0.09	0.16	0.19	0	0	0	0	0	0	0	0	0	0	0	0	0	0	0	0	0	0	0	0	0	0	0	0	0	0	0	0	0	0	0	0	0	0	0	0
67877	Naa20	0.15	0.01	0	15	1	Cluster Enriched	3.67e-06	0.37	0.24	0.26	0.04	0.27	0.31	0.1	0	0.11	0.05	0.09	0.04	0.24	0.1	0	0.08	0.06	0	0	0	0	0	0	0	0	0	0	0	0	0	0	0	0	0	0	0	0	0	0	0	0
192185	Nadk	0.02	0	0	Inf	1	Cluster Enriched	0.166623	0	0	0	0	0	0	0.02	0.03	0.03	0	0.02	0.21	0	0	0	0	0	0	0	0	0	0	0	0	0	0	0	0	0	0	0	0	0	0	0	0	0	0	0	0	0
78658	Ncapd3	0.06	0	0	Inf	1	Cluster Enriched	7.92e-10	0.09	0.1	0.06	0.08	0.06	0.06	0.05	0.03	0.09	0.03	0.03	0.11	0.05	0.03	0	0.03	0.03	0	0	0	0	0	0	0	0	0	0	0	0	0	0	0	0	0	0	0	0	0	0	0	0
52530	Nhp2	0.27	0	0	Inf	1	Cluster Enriched	0.000465245	0	0.44	0.78	0.55	0.57	0.78	0.58	0.35	0	0	0	0	0	0	0	0	0	0	0	0	0	0	0	0	0	0	0	0	0	0	0	0	0	0	0	0	0	0	0	0	0
18181	Nrf1	0.3	0.08	0.02	3.75	1	Cluster Enriched	3.98e-07	0.64	0.38	0.37	0.49	0.39	0.26	0	0.28	0.26	0	0.16	0.28	0.42	0.23	0.27	0	0	0	0	0	0	0	0.21	0.14	0.2	0.19	0.17	0	0	0	0.2	0.15	0	0	0	0	0	0	0	0	0
381318	Nsl1	0.05	0	0	Inf	1	Cluster Enriched	0.00112712	0.04	0	0.07	0	0.19	0.06	0.06	0.03	0.15	0	0.03	0.05	0	0	0	0	0	0	0	0	0	0	0	0	0	0	0	0	0	0	0	0	0	0	0	0	0	0	0	0	0
67711	Nsmce1	0.09	0.02	0	4.5	1	Cluster Enriched	0.0039119	0	0.18	0.11	0	0.1	0.2	0.09	0.05	0.07	0.01	0	0.07	0.04	0	0.41	0.16	0.01	0	0	0	0	0.02	0	0.05	0	0	0	0	0	0	0	0	0	0	0	0	0	0	0	0	0
319638	Nt5dc1	0.07	0.01	0.01	7	1	Cluster Enriched	1.95e-06	0	0.08	0.06	0.13	0.07	0.09	0.14	0.03	0.06	0.02	0.04	0.12	0.08	0.06	0.06	0	0	0	0	0	0	0	0.05	0.06	0	0	0	0	0	0	0	0	0	0	0	0	0	0	0	0	0
19069	Nup88	0.38	0.15	0.07	2.53333	1	Cluster Enriched	7.05e-05	0.36	0.26	0.98	0.25	0.82	0.58	0.27	0.42	0.44	0.18	0.13	0.44	0.16	0.18	0.21	0.24	0.31	0.16	0.09	0.09	0.09	0	0.2	0.2	0.15	0.06	0.25	0.08	0	0.26	0.06	0.06	0.42	0	0.22	0.14	0	0	0	0	0
18392	Orc1	0.07	0	0	Inf	1	Cluster Enriched	0.000108866	0.03	0.07	0.02	0.15	0.31	0.07	0.09	0.04	0.1	0.01	0.04	0.07	0.04	0.03	0.03	0	0.01	0.04	0	0	0	0	0	0	0	0	0	0	0	0	0	0	0	0	0	0	0	0	0	0	0
68083	Pak1ip1	0.72	0.28	0.07	2.57143	1	Cluster Enriched	6.56e-10	1.22	0.78	1.31	0.69	1.15	0.91	0.83	0.52	0.52	0.6	0.6	0.39	0.54	0.51	0.3	0.41	0.27	0.43	0.48	0.14	0.2	0.07	0.14	0.17	0.42	0.52	0.12	0	0.08	0.07	0.05	0	0.1	0.3	0.18	0.13	0.06	0.05	0.08	0	0
11546	Parp2	0.07	0.02	0	3.5	1	Cluster Enriched	7.34e-11	0.09	0.1	0.11	0.09	0.12	0.08	0.07	0.05	0.07	0.04	0.06	0.03	0.07	0.07	0.02	0.07	0	0.02	0.02	0.04	0.01	0	0	0	0.03	0.01	0.05	0	0	0	0	0	0	0	0	0	0	0	0	0	0
18567	Pdcd2	0.12	0.05	0.01	2.4	1	Cluster Enriched	2.88e-05	0.24	0.1	0.23	0.13	0.1	0.12	0.09	0.07	0.09	0.18	0.13	0.06	0.08	0.06	0.06	0.19	0.08	0	0	0	0	0.02	0.24	0.02	0	0	0	0.07	0	0.05	0	0	0	0	0	0	0	0	0	0	0
57028	Pdxp	0.05	0	0	Inf	1	Cluster Enriched	1.82e-06	0.07	0.09	0.1	0.05	0.08	0.1	0.05	0.05	0.05	0	0	0	0.04	0.03	0	0.02	0.04	0	0	0	0	0	0	0	0	0	0	0	0	0	0	0	0	0	0	0	0	0	0	0	0
18616	Peg3	0.07	0.03	0	2.33333	1	Cluster Enriched	0.0145797	0.02	0.02	0.08	0.01	0.05	0.31	0.03	0.24	0.06	0.04	0.02	0.04	0	0.01	0.18	0.02	0.15	0.05	0.08	0.02	0	0	0.05	0.01	0	0	0	0.02	0.01	0.06	0	0	0	0	0	0	0	0	0	0	0
237823	Pfas	0.99	0.39	0.23	2.53846	1	Cluster Enriched	8.69e-07	1.18	0.73	2.65	1.02	1.27	1.55	0.96	0.71	0.92	0.8	0.54	0.56	0.87	0.56	0.53	0.67	0.41	0.48	0.23	0.38	0.27	0.25	0.43	0.23	0.41	0.5	0.44	0.37	0.32	0.24	0.4	0.36	0.26	0.18	0.17	0.26	0.25	0.3	0.25	0.15	0.07
27205	Podxl	0.14	0	0.03	4.66667	1	Cluster Enriched	0.000341358	0.37	0.17	0.4	0.14	0.17	0.27	0.08	0.05	0.11	0	0.06	0.11	0.1	0.05	0.05	0	0	0	0	0	0	0	0	0	0	0	0	0	0	0	0	0	0	0	0	0	0	0	0	0	0
18972	Pold2	0.38	0.16	0.05	2.375	1	Cluster Enriched	4.56e-11	0.46	0.28	0.4	0.49	0.53	0.66	0.47	0.37	0.43	0.19	0.26	0.36	0.31	0.29	0.17	0.18	0.21	0.21	0.16	0.14	0.26	0.09	0.08	0.06	0.18	0.2	0.2	0.08	0.07	0.17	0.08	0.09	0.16	0	0.06	0.07	0.03	0.04	0.08	0	0
18973	Pole	0.06	0	0	Inf	1	Cluster Enriched	1.4e-10	0.05	0.03	0.1	0.05	0.06	0.12	0.08	0.07	0.04	0.04	0.02	0.04	0.02	0.07	0.04	0.03	0	0.01	0	0	0	0	0	0	0	0	0	0	0	0	0	0	0	0	0	0	0	0	0	0	0
20018	Polr1d	0.29	0	0	Inf	1	Cluster Enriched	4.89e-07	0.53	0.04	0.36	0.19	0.49	0.5	0.48	0.42	0.46	0	0	0	0.54	0.31	0	0	0	0	0	0	0	0	0	0	0	0	0	0	0	0	0	0	0	0	0	0	0	0	0	0	0
66849	Ppp1r2	0.02	0	0	Inf	1	Cluster Enriched	0.185502	0	0	0	0	0	0	0	0.18	0.12	0	0	0	0	0	0	0	0	0	0	0	0	0	0	0	0	0	0	0	0	0	0	0	0	0	0	0	0	0	0	0	0
19088	Prkar2b	0.83	0.37	0.09	2.24324	1	Cluster Enriched	1.06e-08	0.84	0.66	1.97	1.02	1.15	0.88	0.91	0.57	0.91	0.53	0.61	0.72	0.64	0.46	0.58	0.5	0.2	0.53	0.34	0.32	0.65	0.42	0.23	0.29	0.34	0.18	0.41	0.15	0.3	0.25	0.41	0	0.57	0	0	0	0	0	0	0	0
71974	Prmt3	0.43	0.11	0	3.90909	1	Cluster Enriched	1.86e-05	0.32	0.35	1.28	0.4	0.64	0.46	0.18	0.34	0.44	0.73	0.11	0.48	0.38	0.34	0.06	0.96	0.1	0.11	0.03	0	0.02	0	0	0	0.06	0.06	0	0	0	0	0	0	0	0	0	0	0	0	0	0	0
19248	Ptpn12	0.1	0.04	0.02	2.5	1	Cluster Enriched	0.04687	0.01	0.05	0.05	0.02	0.07	0.1	0.07	0.42	0.32	0.31	0.02	0.02	0.02	0.01	0.02	0	0.05	0.03	0.04	0	0.03	0.02	0.1	0.04	0.05	0.06	0.06	0.07	0.04	0.03	0.18	0.03	0.03	0	0	0	0	0	0	0	0
80718	Rab27b	0.06	0.02	0	3	1	Cluster Enriched	0.115781	0.28	0.03	0.43	0	0	0	0	0	0	0	0	0	0.04	0.03	0.09	0	0	0	0	0	0	0	0.04	0.04	0.1	0	0.06	0	0	0	0	0	0	0	0	0	0	0	0	0	0
19645	Rb1	0.02	0	0	Inf	1	Cluster Enriched	0.000523742	0	0.03	0.01	0.02	0.01	0.02	0.02	0.08	0.03	0	0	0	0.02	0.02	0	0	0	0	0	0	0	0	0	0	0	0	0	0	0	0	0	0	0	0	0	0	0	0	0	0	0
24105	Rbck1	0.07	0	0	Inf	1	Cluster Enriched	0.41003	0.01	0	1.06	0	0	0	0	0	0	0	0	0	0	0	0	0	0	0	0	0	0	0	0	0	0	0	0	0	0	0	0	0	0	0	0	0	0	0	0	0	0
52202	Rbm34	0.01	0	0	Inf	1	Cluster Enriched	0.145525	0.02	0.03	0.08	0	0	0	0	0	0	0	0	0	0	0	0	0	0	0	0	0	0	0	0	0	0	0	0	0	0	0	0	0	0	0	0	0	0	0	0	0	0
19718	Rfc2	0.92	0.3	0.07	3.06667	1	Cluster Enriched	9.48e-09	1.13	1.04	1.34	1.17	1.09	1.57	0.85	0.58	1.07	0.69	0.66	0.56	1.18	0.74	0.17	0.31	0.27	0.4	0.31	0.21	0	0.11	0.1	0.25	0.26	1.34	0.1	0	0.06	0.09	0.06	0.1	0.77	0.04	0.06	0.03	0	0	0	0	0
19743	Rhag	0.31	0	0	Inf	1	Cluster Enriched	9.85e-10	0.26	0.3	0.16	0.33	0.15	0.2	0.3	0.13	0.47	0.26	0.39	0.77	0.55	0.22	0.09	0	0	0	0	0	0	0	0	0	0	0	0	0	0	0	0	0	0	0	0	0	0	0	0	0	0
67153	Rnaseh2b	0.27	0	0	Inf	1	Cluster Enriched	1.44e-06	0.15	0.93	0.45	0.46	0.14	0.34	0.31	0.14	0.05	0.12	0.18	0.14	0.16	0.4	0.13	0	0	0	0	0	0	0	0	0	0	0	0	0	0	0	0	0	0	0	0	0	0	0	0	0	0
19821	Rnf2	0.26	0.08	0.01	3.25	1	Cluster Enriched	1.91e-06	0.31	0.1	0.7	0.39	0.34	0.35	0.29	0.27	0.39	0.07	0.11	0.1	0.19	0.19	0.07	0.05	0	0.13	0	0.27	0.1	0	0	0	0.19	0	0.2	0	0	0	0	0	0	0.04	0	0.09	0	0	0	0	0
70285	Rpf1	0.02	0	0	Inf	1	Cluster Enriched	0.0376392	0	0	0	0.16	0.04	0.06	0.06	0	0.03	0	0	0	0	0	0	0	0	0	0	0	0	0	0	0	0	0	0	0	0	0	0	0	0	0	0	0	0	0	0	0	0
271842	Rpusd2	0.06	0.02	0	3	1	Cluster Enriched	0.0282438	0.1	0.03	0.06	0.04	0.06	0.04	0.04	0.23	0.02	0.01	0	0.07	0.01	0.2	0	0.28	0.02	0	0	0	0	0	0	0	0	0	0	0	0	0	0	0	0	0	0	0	0	0	0	0	0
59014	Rrs1	0.75	0.19	0	3.94737	1	Cluster Enriched	0.000759805	0.53	0.69	2.97	2.07	1.04	1.44	0.08	0.25	0.24	0.23	0.09	0.23	0.35	0.59	0.44	0.19	0	0.28	0.08	0.47	0.14	0	0	0	0.61	0.1	0.42	0	0	0	0	0	0	0	0	0	0	0	0	0	0
108052	Slc14a1	0.44	0.15	0	2.93333	1	Cluster Enriched	1.08e-07	0.63	0.71	0.23	0.77	0.39	0.29	0.49	0.38	0.41	0.44	0.45	0.19	0	0.74	0.5	0.22	0.28	0.29	0.11	0.17	0.75	0	0	0	0	0	0	0	0	0	0	0	0	0	0	0	0	0	0	0	0
93761	Smarca1	0.09	0	0	Inf	1	Cluster Enriched	0.000114405	0.12	0.21	0.27	0.1	0.22	0.22	0	0	0	0	0	0	0.06	0.12	0.06	0	0	0	0	0	0	0	0	0	0	0	0	0	0	0	0	0	0	0	0	0	0	0	0	0	0
13990	Smarcad1	0.07	0	0	Inf	1	Cluster Enriched	8.11e-05	0.04	0.04	0.1	0.06	0.09	0.3	0.05	0.03	0.06	0.01	0.03	0.09	0.07	0.06	0.01	0.01	0	0.02	0	0	0	0	0	0	0.02	0	0.01	0	0	0	0	0	0	0	0	0	0	0	0	0	0
20588	Smarcc1	0.61	0.28	0.08	2.17857	1	Cluster Enriched	4.57e-11	0.6	0.56	1.11	0.84	0.69	0.91	0.61	0.48	0.64	0.3	0.4	0.5	0.57	0.38	0.59	0.4	0.42	0.59	0.15	0.18	0.17	0.19	0.22	0.16	0.32	0.28	0.27	0.14	0.15	0.2	0.11	0.12	0.18	0.09	0.13	0	0.06	0.12	0	0	0
67629	Spc24	0.33	0.11	0.01	3	1	Cluster Enriched	6.8e-07	0.54	0.38	0.46	0.33	0.34	0.42	0.3	0.25	0.29	0.41	0.33	0.14	0.38	0.4	0	0.41	0.24	0	0	0	0	0	0.65	0.02	0	0	0	0	0	0	0	0.09	0.06	0.02	0.01	0	0	0	0	0	0
108800	Ston2	0.02	0	0	Inf	1	Cluster Enriched	0.000478772	0.03	0.03	0.05	0.09	0.03	0.03	0.03	0	0.06	0	0	0	0	0	0	0	0	0	0	0	0	0	0	0	0	0	0	0	0	0	0	0	0	0	0	0	0	0	0	0	0
52615	Suz12	0.11	0.03	0	3.66667	1	Cluster Enriched	2.45e-11	0.14	0.14	0.16	0.15	0.13	0.04	0.15	0.1	0.16	0.15	0.12	0.09	0.06	0.05	0.02	0.05	0	0.02	0.05	0.04	0.02	0.01	0.01	0.04	0.02	0.01	0.04	0.04	0.02	0	0	0	0	0	0	0	0	0	0	0	0
21349	Tal1	0.35	0.02	0	17.5	1	Cluster Enriched	0.03602	0.25	2.59	0.07	0.24	0.41	0	0.19	0.4	0.6	0.06	0.11	0.13	0.07	0.13	0	0.12	0.09	0	0	0	0	0	0	0	0	0	0	0	0	0	0	0	0	0	0	0	0	0	0	0	0
209446	Tfe3	0.01	0	0	Inf	1	Cluster Enriched	0.177286	0	0	0	0	0.05	0.04	0	0	0	0	0	0	0	0	0	0	0	0	0	0	0	0	0	0	0	0	0	0	0	0	0	0	0	0	0	0	0	0	0	0	0
21803	Tgfb1	0.14	0.02	0	7	1	Cluster Enriched	0.0418122	0.14	0.02	0.17	0.09	0.21	0.1	1	0.06	0.15	0	0	0	0.04	0.07	0	0	0	0	0	0	0	0	0	0	0	0.13	0.07	0	0	0	0	0	0	0	0	0	0	0	0	0	0
21814	Tgfbr3	0.04	0	0	Inf	1	Cluster Enriched	0.0584781	0	0.02	0.18	0	0.2	0.27	0	0	0	0	0	0	0	0	0	0	0	0	0	0	0	0	0	0	0	0	0	0	0	0	0	0	0	0	0	0	0	0	0	0	0
240174	Thada	0.04	0.01	0	4	1	Cluster Enriched	0.00197705	0.04	0.02	0.08	0.03	0.03	0.09	0.05	0.01	0.02	0.01	0.01	0.13	0.01	0.02	0.01	0.01	0.01	0.01	0.01	0.02	0	0	0.02	0.07	0	0	0	0	0	0	0.02	0	0.04	0	0	0	0	0	0	0	0
21877	Tk1	0.87	0.25	0	3.48	1	Cluster Enriched	2.34e-12	0.54	0.96	0.69	0.66	0.9	0.48	1.12	1.2	1.12	0.8	0.85	1.64	1.17	0.37	0.58	0.65	0.23	0.44	0	0.37	0.33	0.17	0.16	0.18	0	0.27	0.24	0	0	0	0	0	0	0	0	0	0	0	0	0	0
94346	Tmem40	0.08	0	0	Inf	1	Cluster Enriched	0.176504	0	0	0	0	0	0	0	0	0	0.66	0.55	0	0	0	0	0	0	0	0	0	0	0	0	0	0	0	0	0	0	0	0	0	0	0	0	0	0	0	0	0	0
66926	Trmt6	0.09	0.04	0	2.25	1	Cluster Enriched	0.0213269	0.07	0.42	0.22	0.11	0.12	0.11	0.05	0.09	0.02	0.01	0.02	0.05	0.05	0.05	0.02	0	0	0	0	0	0	0	0.07	0.03	0	0.38	0.06	0	0.03	0.02	0	0	0	0	0	0	0	0	0	0	0
21807	Tsc22d1	1.4	0.34	0.42	3.33333	1	Cluster Enriched	0.177693	0.37	0.28	0.3	3.95	6.02	2.23	0	0	0	0.25	0.23	4	0.2	0.23	2.95	0	0	0	0.26	0.29	3.59	0	0	0	0	0	0	1.37	6.21	0	0	0	0	0	0	0	0	0	0	0	0
74044	Ttf2	0.02	0	0	Inf	1	Cluster Enriched	8.19e-05	0.03	0.04	0.02	0.06	0.02	0.04	0.03	0.01	0.05	0	0	0	0	0	0	0	0	0	0	0	0	0	0	0	0	0	0	0	0	0	0	0	0	0	0	0	0	0	0	0	0
223723	Ttll12	1.98	0.86	0.52	2.30233	1	Cluster Enriched	4.33e-13	2.34	1.67	2.94	1.91	2.76	2.43	2.56	1.66	1.63	1.41	1.32	1.85	1.76	1.66	1.82	1.18	1.29	1.15	0.6	0.91	0.89	0.51	0.79	0.55	0.87	0.87	0.7	0.78	0.97	0.49	0.57	0.7	0.74	0.81	0.59	0.53	0.39	0.5	0.44	0.16	0.38
28071	Twistnb	0.13	0.01	0	13	1	Cluster Enriched	0.0660281	0.06	0.06	1.07	0.16	0.06	0	0.09	0.11	0.07	0	0	0	0.27	0	0.04	0	0	0	0	0	0	0.05	0.03	0.02	0	0	0	0	0	0	0	0	0	0	0	0	0	0	0	0	0
353170	Txlng	0.05	0	0	Inf	1	Cluster Enriched	0.00012787	0.09	0.02	0.04	0.04	0.11	0.07	0	0	0	0	0	0	0.15	0.1	0.09	0	0	0	0	0	0	0	0	0	0	0	0	0	0	0	0	0	0	0	0	0	0	0	0	0	0
80914	Uck2	0.28	0	0	Inf	1	Cluster Enriched	0.000434631	0.4	0.39	0.81	0.74	0.7	0.73	0.24	0	0.15	0	0	0	0	0	0	0	0	0	0	0	0	0	0	0	0	0	0	0	0	0	0	0	0	0	0	0	0	0	0	0	0
22380	Wbp4	0.01	0	0	Inf	1	Cluster Enriched	0.18535	0	0	0	0	0.08	0.12	0	0	0	0	0	0	0	0	0	0	0	0	0	0	0	0	0	0	0	0	0	0	0	0	0	0	0	0	0	0	0	0	0	0	0
545085	Wdr70	0.05	0.01	0	5	1	Cluster Enriched	0.0022362	0.09	0.05	0.09	0.17	0.09	0.06	0.03	0.05	0.06	0	0.03	0.02	0	0	0	0.15	0	0.02	0	0	0	0	0	0	0	0	0	0	0	0	0	0	0	0	0	0	0	0	0	0	0
383295	Ypel5	0.34	0.13	0.08	2.61538	1	Cluster Enriched	0.0105882	0.08	0	0.18	0.73	0.95	0.11	0.87	0.53	0.5	0.1	0.4	0.11	0	0.23	0.24	0.34	0.12	0.41	0	0	0	0	0	0	0.25	0.32	0.07	0.29	0.12	0	0.23	0.51	0	0	0	0	0	0	0	0.18	0.11
209032	Zc3hav1l	0.04	0.01	0	4	1	Cluster Enriched	0.000840119	0.11	0.1	0.1	0.02	0	0.1	0.03	0.03	0.01	0.02	0	0.02	0.05	0.07	0	0.11	0.02	0.02	0	0	0	0	0	0	0	0	0	0	0	0	0	0	0	0	0	0	0	0	0	0	0
243905	Zfp568	0.01	0	0	Inf	1	Cluster Enriched	0.206319	0	0.06	0.03	0	0	0	0	0	0	0	0	0	0	0	0	0	0	0	0	0	0	0	0	0	0	0	0	0	0	0	0	0	0	0	0	0	0	0	0	0	0
78266	Zfp687	0.01	0	0	Inf	1	Cluster Enriched	0.177396	0	0.04	0.05	0	0	0	0	0	0	0	0	0	0	0	0	0	0	0	0	0	0	0	0	0	0	0	0	0	0	0	0	0	0	0	0	0	0	0	0	0	0
22761	Zfpm1	0.11	0.01	0	11	1	Cluster Enriched	6.04e-06	0.12	0.13	0.41	0.1	0.2	0.09	0.13	0.07	0.09	0.04	0.04	0.04	0.05	0.09	0.05	0	0.03	0.05	0	0	0	0	0	0	0	0	0	0	0	0	0	0	0	0	0	0	0	0	0	0	0
52696	Zwint	0.23	0	0	Inf	1	Cluster Enriched	0.00083306	0.75	0	0.98	0.3	0.29	0.38	0.04	0.09	0.22	0.08	0.17	0.21	0	0	0	0	0	0	0	0	0	0	0	0	0	0	0	0	0	0	0	0	0	0	0	0	0	0	0	0	0
235633	Als2cl	0	0.01	0	Inf	2	Cluster Enriched	0.310361	0	0	0	0	0	0	0	0	0	0	0	0	0	0	0	0	0	0	0	0	0	0	0	0	0.01	0.01	0.13	0.02	0.01	0	0	0	0	0	0	0	0	0	0	0	0.01
72399	Brap	0.03	0.07	0.03	2.33333	2	Cluster Enriched	0.467269	0.02	0	0.06	0	0.16	0.01	0.03	0	0.01	0	0	0	0.08	0.01	0	0	0	0	0	0	0	0	0.04	0.55	0	0.08	0.13	0.07	0	0.14	0	0.02	0.08	0	0	0	0	0	0	0	0
13035	Ctsg	0.3	0.8	0.13	2.66667	2	Cluster Enriched	3.01e-05	0	0	0	0	0	0	0.42	0.55	0.25	0.27	0.51	0.49	0.27	0.57	1.21	0.21	0.57	0.82	0.96	0.99	0.71	0.49	1.73	0.73	0.93	0.48	0.98	0.92	0.44	0.06	0.63	0.08	0.23	0	0	0	0	0	0	0	0
78749	Filip1l	0	0.01	0	Inf	2	Cluster Enriched	0.207684	0	0	0	0	0	0	0	0	0	0	0	0	0	0	0	0	0	0	0	0	0	0	0	0	0	0.06	0.01	0	0	0	0	0	0	0	0	0	0	0	0	0	0
14360	Fyn	0.06	0.16	0.03	2.66667	2	Cluster Enriched	0.299352	0.07	0.09	0.07	0	0.04	0.06	0.07	0.11	0.05	0.07	0.06	0.04	0.12	0.11	0	0.05	0.07	0.21	0	0	0	0	0.08	0.02	0	0.06	1.46	0	0	0	0.14	0.08	0.07	0.08	0.05	0	0	0	0	0	0
14696	Gnb4	0	0.23	0	Inf	2	Cluster Enriched	0.0894932	0	0	0	0	0	0	0	0	0	0	0	0	0	0	0	0	0	0	1.49	0	1.22	0	0	0	0	0	0	0	0	0	0	0	0	0	0	0	0	0	0	0	0
14702	Gng2	0.26	1.73	0.03	6.65385	2	Cluster Enriched	0.0159404	0.29	0	1.11	0.11	0.16	0.53	0	0	0	0.37	0.35	0.4	0.22	0	0.32	0.22	3.77	0	6.81	0	0.62	0	0	0	7.78	0.75	0.77	0.09	0.44	0	0	0	0	0	0	0	0	0	0	0	0
53334	Gosr1	0.03	0.21	0.04	5.25	2	Cluster Enriched	0.0207591	0	0.1	0.07	0	0	0	0	0	0	0.1	0.03	0.09	0.05	0	0.05	0.42	0.05	0	0	0	0	0.07	0.11	0.44	0.71	0	0.72	0.17	0	0.47	0	0	0	0	0	0	0	0	0	0	0
15270	H2afx	0	31.58	11.38	2.77504	2	Cluster Enriched	0.04389	0	0	0	0	0	0	0	0	0	0	0	0	0	0	0	0	0	0	0	0	0	67.53	0	81.09	112.06	0	118.33	0	0	0	0	0	0	0	0	0	0	75.91	62.03	0	0
15958	Ifit2	0	0.02	0	Inf	2	Cluster Enriched	0.00266709	0	0	0	0	0	0	0	0	0	0	0	0	0	0	0	0	0	0	0.03	0.08	0	0	0	0	0.08	0.02	0.07	0	0	0	0	0	0	0	0	0	0	0	0	0	0
16803	Lbp	0	0.03	0.01	3	2	Cluster Enriched	0.119233	0	0	0	0	0	0	0	0	0	0	0	0	0	0	0	0	0.02	0.02	0	0	0	0.04	0	0.04	0	0.04	0.15	0	0	0	0	0.11	0.07	0	0	0	0	0	0	0	0
16985	Lsp1	0.39	2.37	1.04	2.27885	2	Cluster Enriched	0.0753892	0.19	0.08	0.23	0.23	0.11	0.25	0.09	0.61	0.67	0.87	0.11	0.63	0.27	0.23	1.25	0.91	1.32	1.27	0.44	1.42	0.78	0.94	0.88	4.89	0.58	10.08	4.96	0.48	0.64	6.24	1.23	7.46	1.06	0.24	0.58	0.11	0.19	0	0.15	0	0
17105	Lyz2	0.79	1.87	0.44	2.36709	2	Cluster Enriched	0.0108707	0	0	0	0	0	0	0.67	2.56	1.59	0.44	0	1.55	0.35	0.27	4.37	0.58	1.35	4.29	3.5	3.72	2.63	0.8	1.2	1.48	1.17	0.95	0.72	1	1.09	3.25	0.88	0	1.61	0	0	0	0	0	0	0	0
17476	Mpeg1	0.01	0.06	0.01	6	2	Cluster Enriched	0.227778	0	0	0	0	0	0	0.04	0.03	0.06	0	0	0	0	0	0	0.01	0	0.08	0	0	0	0.01	0	0.04	0.09	0	0.45	0.03	0.03	0.18	0	0	0	0	0	0	0	0	0	0	0
18054	Ngp	3.45	20.88	3.84	5.4375	2	Cluster Enriched	2.31e-05	0	0	0	0.26	0.73	0.36	0.74	7.61	2.98	4.07	2.62	9.11	1.66	1.82	19.82	8.47	10.27	38.95	37.46	39.22	46.62	11.29	10.78	10.44	12.18	15.34	9.53	7.89	8.99	15.41	15.79	11.2	6.77	1.37	1.71	0	0	0	0	0	0
19091	Prkg1	0	0.01	0	Inf	2	Cluster Enriched	0.119387	0	0	0	0	0	0	0	0	0	0	0	0	0	0	0	0	0.02	0.01	0	0	0	0	0	0	0.01	0.03	0	0	0	0	0	0.02	0.02	0	0	0	0	0	0	0	0
19152	Prtn3	1.64	3.54	0.5	2.15854	2	Cluster Enriched	4.35e-06	0	0	0	0.19	0.33	0.15	1.57	3.16	2.35	2.44	2.4	3.95	2.06	1.17	4.87	1.96	3.43	6.81	2.77	5.42	4.62	3.25	2.15	3.74	3.77	2.46	2.12	2.51	1.48	2.41	1.14	0.51	1	0	0	0	0	0	0	0	0
105670	Rcbtb2	0.01	0.03	0.01	3	2	Cluster Enriched	0.573709	0	0	0	0	0.01	0.01	0.06	0.01	0	0	0	0	0	0	0	0	0	0	0	0	0	0	0	0	0	0.32	0.01	0.08	0	0.02	0	0.02	0.04	0	0	0	0	0	0	0	0
20201	S100a8	2.72	9.79	0.81	3.59926	2	Cluster Enriched	4.75e-05	0	0	0	0.47	0	0.26	0	11.03	6.03	0	3.97	5.34	1.07	1.96	10.65	0	6.06	22.49	14.17	20.92	13.99	5.15	6.5	5.73	11.87	7.09	3.53	0	0	0	10.11	0	4.49	0	0	0	0	0	0	0	0
20202	S100a9	8.65	24.85	7.5	2.87283	2	Cluster Enriched	0.00526942	0.77	1.19	3.78	2.65	2.39	1.54	2.57	18.83	15.33	6.06	9.3	15.73	5.07	5.56	38.94	11.82	14.66	37.92	30	50.62	43.7	29.18	21.47	17.26	18.81	14.96	7.82	12.93	62.99	15.02	23.37	7.89	7.16	2.03	2.04	0.33	0	0	0	0	0
66222	Serpinb1a	0.82	1.68	0.3	2.04878	2	Cluster Enriched	0.000525887	0.16	0.1	0.27	0.36	0.36	0.15	0.35	3.04	1.58	0.62	0.57	1.54	0.44	0.7	2	0.63	0.37	3.93	2.26	2.03	3.08	1.32	0.41	1.82	1.36	0.64	2.28	1.2	0.11	1.01	0	0.06	1.24	0.62	0.1	0	0.44	0	0.33	0	0
58234	Shank3	0	0.05	0.01	5	2	Cluster Enriched	0.345885	0	0	0	0	0	0	0	0	0	0	0	0	0	0	0	0	0	0	0	0	0	0	0	0	0	0.53	0.02	0	0	0	0.02	0	0.1	0	0	0	0	0	0	0	0
268860	Abat	1.04	14.67	34.11	2.32515	3	Cluster Enriched	0.000214021	2.19	1.91	0.16	0.11	0.15	0.2	0.54	0.61	0.87	0.77	0.93	1.14	1.22	1.64	3.14	1.79	2.64	7.15	5.79	15.17	2.26	8.44	2.8	26.73	77.73	22.61	2.9	1.99	41.25	8.1	14.4	9.28	4.43	50.29	27.52	50.57	8.74	75.79	45.64	66.95	33.8
11666	Abcd1	0.01	0.01	0.08	8	3	Cluster Enriched	0.0375696	0	0	0	0.02	0.03	0.01	0.02	0.04	0.02	0	0.01	0.02	0	0	0	0	0	0	0	0.01	0.01	0	0.01	0.05	0	0.03	0.05	0	0	0	0.04	0.3	0.24	0	0.03	0.06	0.03	0.23	0.37	0	0
27409	Abcg5	0	0	0.23	Inf	3	Cluster Enriched	0.00380307	0	0	0	0	0	0	0	0	0	0	0	0	0	0	0	0	0	0	0	0	0	0	0	0	0	0	0	0	0.14	0.06	0.26	0.13	0.34	0.76	1.15	0.54	0.22	0.25	0.11	0	0
67470	Abcg8	0	0.02	0.33	16.5	3	Cluster Enriched	9.27e-05	0	0	0	0	0	0	0	0	0	0	0	0	0	0	0	0	0	0	0	0	0	0.03	0.05	0.01	0.05	0.04	0.03	0.31	0.17	0.24	0.3	0.57	0.44	1.29	0.85	0.41	0.29	0.11	0.3	0.14	0.15
76491	Abhd14b	2.06	11.09	49.11	4.42831	3	Cluster Enriched	2.94e-12	0.69	0.63	0.52	1.19	0.67	0.9	2.03	3.84	2.6	1.99	2.64	3.57	3.29	1.44	4.83	4	5.1	9.73	8.48	6.66	10.3	7.85	12.31	10.62	20.71	25.12	12.17	23.52	19.95	25.99	49.03	38.02	21.49	39.32	50.17	51.2	50.72	77.33	66.48	77.36	65.92
106861	Abhd3	0	0	0.06	Inf	3	Cluster Enriched	0.0226667	0	0	0	0	0	0	0	0	0	0	0	0	0	0	0	0	0	0	0	0	0	0	0	0	0	0	0	0	0.32	0.02	0	0	0	0	0	0	0	0	0	0.19	0
52538	Acaa2	17.74	227.28	850.01	3.73992	3	Cluster Enriched	8.99e-15	5.72	3.82	8.34	7.15	6.77	5.19	9.5	29.19	24.53	22.36	18.98	32.98	16.79	11.54	63.2	37.21	37.35	197.22	155.84	147.03	120.27	181.45	202.89	268.13	455.12	394.46	530.38	566.59	619.23	817.47	918.23	562.65	884.81	1359.41	1311.31	1224.57	930.69	883.04	784.42	850.12	618.97
11363	Acadl	5.97	43.15	120.22	2.7861	3	Cluster Enriched	2.84e-07	2.09	2.35	3.71	3.44	3.62	2.78	3.76	8.55	9.3	10.31	4.99	7.72	8.03	5.41	13.46	16.73	13.93	25.68	23.58	23.7	21.05	35.14	46.74	45.66	102.62	90.2	72.82	110.11	150.3	129.44	153.78	211.27	154.19	195.73	278.77	184.13	94.5	113.24	84.79	59.62	75.04
11565	Adssl1	0.15	0.22	0.46	2.09091	3	Cluster Enriched	0.0149771	0	0	0	0.02	0.08	0.04	0.11	0.16	0.13	0.03	0.08	1.18	0.28	0.01	0.13	0.01	0.09	0.23	0.1	0.31	0.62	0.05	0.16	0.14	0.12	0.43	0.43	0.11	0.4	0.12	0	0.61	0.33	0.2	0.77	0.18	0.63	1.21	0.91	0.71	0.41
67512	Agpat2	0.04	0.59	3.46	5.86441	3	Cluster Enriched	3e-08	0	0	0	0	0	0	0.1	0.06	0.05	0	0.14	0.04	0.04	0	0.1	0.08	0.28	0.13	0.79	0.72	0	0.54	0.85	0.43	1.24	1.05	0.99	1.61	1.12	5.4	1.87	7.11	2.5	2.61	1.63	5.42	4.42	7.64	5.83	3.56	2.78
71361	Aifm2	0	0.09	0.52	5.77778	3	Cluster Enriched	0.00017476	0	0	0	0	0	0	0	0	0	0	0	0	0	0	0	0	0	0	0.07	0.14	0	0	0	0	0.2	0.17	0.54	0	0.78	0.11	0.54	0.23	1.37	0.13	1.47	1.21	0.14	0.67	0	0	0.34
58810	Akr1a1	2.75	12.04	35.84	2.97674	3	Cluster Enriched	4.09e-14	1.84	2.18	2.38	1.74	1.3	2.2	1.9	3.47	3.06	4.81	1.96	3.72	3.73	2.16	4.85	4.78	6.56	7.06	15.07	12.26	7.68	11.24	13.98	8.75	22.38	20.53	14.23	34.61	14.97	20.11	46.85	32.48	30.41	23.19	28.86	40.76	43.24	48.54	31.69	55.48	39.84
11668	Aldh1a1	0	0.4	99.01	247.525	3	Cluster Enriched	0.00290686	0	0	0	0	0	0	0	0	0	0	0	0	0	0	0	0	0	0	0	0	0	0	0.82	0.46	0	2.66	0.89	3.17	2.73	0.77	4.66	0	1.36	6.01	4.49	5.04	47.17	48.34	38.69	198.52	299.39
11669	Aldh2	12.46	58.74	357.76	6.09057	3	Cluster Enriched	6.5e-10	6.02	5.87	8.94	6.23	9.65	8.75	9.54	23.04	13.63	16.75	11.73	16.72	14.18	8.4	27.45	19.18	26.27	52.34	43.93	38.8	43.76	45.53	63.9	54.94	121.53	110.67	84.07	89.97	111.55	157.74	282.19	163.13	188.94	293.33	201.55	346.32	496.69	501.44	539.36	623.78	540.26
11671	Aldh3a2	0.56	4.14	13.7	3.30918	3	Cluster Enriched	9.46e-12	0.18	0.32	0.12	0.31	0.28	0.11	0.44	1.2	0.73	0.6	0.56	0.9	0.65	0.6	1.39	1.43	1.09	2.56	2.78	3.67	1.92	3.42	2.92	3.07	8.76	11.09	7.02	12.15	9.95	12.41	9.71	14.86	21.97	21.17	21.56	16.56	11.8	12.65	12.7	6.34	19.4
56369	Apip	0.45	0.43	0.95	2.11111	3	Cluster Enriched	1.77e-06	0.59	0.52	0.81	0.57	0.48	0.36	0.31	0.35	0.67	0.17	0.32	0.44	0.26	0.44	0.41	0.16	0.51	0.52	0.35	0.22	0.18	0.4	0.77	0.28	0.47	0.73	0.59	1.17	0.53	0.8	0.66	1.37	0.74	1.12	1.12	1.51	0.74	1.18	1.08	0.64	0.44
11814	Apoc3	0	0.05	4.73	94.6	3	Cluster Enriched	0.000588457	0	0	0	0	0	0	0	0	0	0	0	0	0	0	0	0	0	0	0.25	0.34	0	0	0	0	0	0	0	2.38	11.31	0.88	3.94	1.14	1.19	0	0	0	14.85	6.65	3.63	2.17	5.08
69632	Arhgef12	0	0.04	0.13	3.25	3	Cluster Enriched	0.000381522	0	0	0	0	0	0	0	0	0	0.01	0	0.01	0	0	0	0.01	0.01	0.02	0	0	0	0.01	0.05	0.02	0.14	0.07	0.15	0.12	0.03	0.05	0.08	0.03	0.07	0.14	0.1	0.14	0.52	0.11	0.1	0.21	0.01
76295	Atp11b	0	0	0.01	Inf	3	Cluster Enriched	0.267239	0	0	0	0	0	0	0	0	0	0	0	0	0	0	0	0	0	0	0	0	0	0	0	0	0	0	0	0	0	0	0	0	0	0	0	0	0	0	0	0	0
12010	B2m	0	0	1.01	Inf	3	Cluster Enriched	0.0108629	0	0	0	0	0	0	0	0	0	0	0	0	0	0	0	0	0	0	0	0	0	0	0	0	0	0	0	0	0	0	0	0	0	2.88	3.41	0	0	0	0	0	2.73
27061	Bcap31	1.14	2.12	6.56	3.09434	3	Cluster Enriched	2.64e-07	0.75	1.06	1.67	0.91	1.61	0.82	1.12	1.81	1.39	0.49	1.19	1.45	0.64	0.81	1.39	0.55	0.81	3.47	1.09	2.62	3.29	0.79	1.82	3.25	1.92	2.37	3.4	2.81	7.59	6.16	1.92	7.13	5.75	3.39	12.1	11.14	3.52	4.94	9.56	1.28	2.71
23827	Bpnt1	0.39	1.58	4.83	3.05696	3	Cluster Enriched	1.38e-09	0.24	0.26	0.35	0.26	0.46	0.28	0.31	0.6	0.52	0.41	0.21	0.56	0.38	0.25	0.73	0.39	0.46	1.53	1.14	1.28	1.01	1.68	1.32	1.24	3.79	3	2.16	1.93	2.21	2.75	4.28	4.39	2.16	4.27	3.97	2.63	5.4	7.45	4.82	8.88	8.67
52163	Camk1	0.08	0.11	0.27	2.45455	3	Cluster Enriched	0.012206	0.03	0.05	0.12	0.13	0.07	0.1	0.04	0.11	0.16	0.04	0.05	0.1	0.03	0.08	0.15	0.08	0.12	0.09	0.13	0.18	0.14	0.03	0.15	0.06	0	0.19	0.17	0.28	0.33	0.55	0.18	0.33	0.31	0.59	0.15	0	0.33	0	0.62	0	0.07
52502	Carhsp1	0.47	1.74	4.09	2.35057	3	Cluster Enriched	1.81e-08	0	1.08	1.27	0	0	0	1.41	1.61	1.64	0	0	0	0	0	0	1.95	0	2.87	2.54	2.13	1.99	1.27	0	1.81	0	3.67	2.68	0	3.19	4.56	4.93	7.32	3.41	6.28	4.53	5.73	5.15	4.68	4.31	3.26	4.7
12359	Cat	12.89	55.78	325.07	5.82772	3	Cluster Enriched	3.46e-13	7.28	6.02	10.28	5.66	7	10.24	7.31	24.02	20.47	14.56	12.44	17.44	13.66	11.33	25.63	22.95	17.81	36.32	55.65	46.78	35.3	46.31	40.44	50.61	118.84	103.72	94.68	129.43	182.63	183.63	139.92	209.11	228.45	338.67	292.15	403.43	404.41	491.21	394.15	506.25	413.01
12520	Cd81	0.13	0.2	1.19	5.95	3	Cluster Enriched	0.000157521	0.3	0.24	0	0.49	0	0.31	0	0	0	0	0	0	0.17	0.17	0.2	0.26	0.07	0.22	0.22	0.38	0.48	0	0	0	0	0.33	0.38	1.26	0	0.29	0.85	0	1.52	0	0.96	2.38	1	2.93	3.73	1.81	0.92
12558	Cdh2	0.04	0.12	0.48	4	3	Cluster Enriched	2.17e-10	0	0.01	0.04	0.08	0.02	0.06	0.04	0.04	0.03	0.05	0.02	0	0.07	0.01	0.11	0	0.07	0.13	0.06	0.07	0.03	0.08	0.19	0.02	0.21	0.44	0.13	0.13	0.25	0.27	0.36	0.59	0.46	0.7	0.41	0.55	0.73	0.82	0.79	0.34	0.38
72361	Ces2g	0.06	0.2	3.02	15.1	3	Cluster Enriched	6.01e-09	0	0	0	0.02	0.02	0	0.12	0.04	0	0.06	0.03	0.24	0.15	0.06	0.1	0.18	0.06	0.27	0.19	0.23	0.06	0.06	0.15	0.05	0.36	0.66	0.08	1.07	0.8	1.22	1.21	1.17	2.26	3.73	2.9	6.81	3.59	4.57	4.27	2.69	2.12
93694	Clec2d	0	0.02	0.09	4.5	3	Cluster Enriched	0.129264	0	0	0	0	0	0	0	0	0	0	0	0	0	0	0	0	0	0	0	0	0	0	0.26	0.03	0	0	0	0	0.05	0.12	0.06	0.09	0.1	0	0	0	0.32	0.71	0.17	0	0
12808	Cobl	0	0	0.01	Inf	3	Cluster Enriched	0.454138	0	0	0	0	0	0	0	0	0	0	0	0	0	0	0	0	0	0	0	0	0	0	0	0	0	0	0	0	0	0	0	0	0	0	0	0	0	0	0	0	0
171508	Creld1	0	0.02	0.14	7	3	Cluster Enriched	8.56e-07	0	0	0	0	0	0	0	0	0	0	0	0	0	0	0	0	0	0	0	0	0	0.05	0.04	0.05	0.03	0.07	0.06	0.12	0.15	0.23	0	0.12	0.25	0.11	0.11	0.15	0	0.11	0.13	0	0.1
246277	Csad	0.38	9.48	24.7	2.60549	3	Cluster Enriched	1.17e-06	0	0	0	0.4	0.04	0.09	0.06	0.53	0.47	0.34	0.2	0.74	0.47	0.23	2.13	0.4	2.36	4.86	8.14	6.87	4.68	6.57	15.45	10.75	14.23	27.18	12.31	26.62	25.32	27.3	32.51	23.46	26.07	14.18	13.77	27.16	6.4	10.74	10.69	55.63	6.52
13040	Ctss	0.01	0.08	0.21	2.625	3	Cluster Enriched	0.352117	0	0	0	0	0	0	0	0	0	0	0.04	0.12	0	0	0	0	0	0	0.19	0	0.16	0.19	0.25	0.23	0	0	0	0	0.05	0.96	0	2.29	0.12	0	0	0	0	0	0	0.18	0.11
13120	Cyp4b1	0	0.01	0.19	19	3	Cluster Enriched	0.00481128	0	0	0	0	0	0	0	0	0	0	0	0	0	0	0	0	0	0	0	0	0	0	0	0	0	0.04	0.04	0	0	0	0.12	0.18	1.08	0.06	0.06	0	0.05	0.12	0.23	0.22	0.18
13123	Cyp7b1	0	0	1.31	Inf	3	Cluster Enriched	0.135642	0	0	0	0	0	0	0	0	0	0	0	0	0	0	0	0	0	0	0	0	0	0	0	0	0	0	0	0	0	0	0	0	0	0	0	0	0	0	0	0.24	0
28199	Dcaf11	0.07	0.08	0.65	8.125	3	Cluster Enriched	1.06e-07	0.05	0.01	0.12	0.03	0.06	0.04	0.07	0.05	0.08	0.07	0.06	0.17	0.02	0.06	0.11	0.06	0.06	0.17	0	0.08	0.07	0.04	0.11	0.06	0.14	0.13	0.1	0.36	0.35	0.1	0.14	0.15	0.21	0.65	0.77	0.33	1.29	0.78	0.83	1.04	1.23
67880	Dcxr	0.24	2.73	15.05	5.51282	3	Cluster Enriched	7.31e-09	0	0	0	0.07	0.05	0	0.04	0.48	0.55	0.12	0.22	0.43	0.16	0.12	1.42	0.51	0.37	1.21	0.82	1.65	1.19	1.13	4.39	2.22	6.32	8.2	4.78	5.56	6.24	6.56	14.2	7.99	5.97	20.46	15.7	14.04	26.23	34.6	26.45	14.94	20.75
232449	Dera	0.53	0.74	1.79	2.41892	3	Cluster Enriched	2.1e-05	0.13	0.31	3.03	0.32	0.29	0.28	0.5	0.49	0.5	0.2	0.28	0.37	0.35	0.38	0.45	0.27	0.48	0.48	0.51	0.69	0.34	0.44	0.85	0.63	1.73	1.33	1.09	0.62	1.01	1.31	1.56	1.03	1.47	2.18	1.31	2.17	1.24	3.64	3.15	2.1	2.07
20148	Dhrs3	0	0	0.23	Inf	3	Cluster Enriched	4.11e-05	0	0	0	0	0	0	0	0	0	0	0	0	0	0	0	0	0	0	0	0	0	0	0	0	0	0	0	0	0	0	0.08	0.01	0.1	0.27	0.15	0.71	0.36	0.12	0.4	0.14	0.1
238130	Dock4	0	0	0.01	Inf	3	Cluster Enriched	0.0532147	0	0	0	0	0	0	0	0	0	0	0	0	0	0	0	0	0	0	0	0	0	0	0	0	0	0	0	0	0	0	0	0	0	0	0.04	0.07	0	0.02	0.01	0	0
13479	Dpep1	0	0	0.01	Inf	3	Cluster Enriched	0.385611	0	0	0	0	0	0	0	0	0	0	0	0	0	0	0	0	0	0	0	0	0	0	0	0	0	0	0	0	0	0	0	0	0	0	0	0	0	0	0	0	0
83768	Dpp7	0.05	0.16	0.51	3.1875	3	Cluster Enriched	1.64e-08	0.01	0.01	0.04	0	0.04	0.02	0	0.04	0.05	0.02	0	0.02	0.4	0	0.08	0	0.06	0.08	0.09	0.09	0.05	0.05	0.32	0.1	0.44	0.31	0.35	0.55	0.49	0.56	0.93	0.44	0.63	0.6	0.4	0.27	0.62	0.29	0.22	0.68	0.22
68801	Elovl5	0	0.55	5.11	9.29091	3	Cluster Enriched	5.23e-06	0	0	0	0	0	0	0	0	0	0	0	0	0	0	0	0	0	0	0	0	0	0.26	1.16	0.39	1.7	0.7	2.42	1.9	2.25	2.51	2.85	3.78	14.57	8.79	10.75	10.87	2.45	6.49	8.33	4.27	1.52
13885	Esd	6.92	16.91	61.29	3.62448	3	Cluster Enriched	7.16e-14	4.43	6.9	6.9	7.01	5.62	6.34	4.83	8.93	8.46	8.7	5.79	11.06	4.85	4.99	9.03	8.1	7.09	21.21	11.66	16.61	10.97	11.12	18.32	14.7	28.01	30.82	24.31	28.86	38.81	42.51	57.04	54.54	42.73	60.74	81.46	83.12	61.56	101.69	84.27	68.24	48.56
66841	Etfdh	0.96	7.82	31.88	4.07673	3	Cluster Enriched	9.21e-12	0.27	2.54	1.55	0.47	0.53	0.78	0.5	0.96	0.61	0.73	1.28	1.16	0.84	0.46	1.66	1.44	1.44	7.41	4.59	3.15	8.25	4.49	7.49	7.74	14.94	17.91	14.96	19.2	17.7	26.27	31.87	33.59	59.82	43.11	33.05	51.73	33.12	52.14	31.71	25.14	31.43
16456	F11r	0.18	0.43	1.58	3.67442	3	Cluster Enriched	0.0199535	0.08	0.04	0.33	0.08	0.28	0.24	0.14	0.25	0.27	0.07	0.28	0.36	0.16	0.12	0.07	0	0.16	0.47	0.51	0.65	0.16	0.21	0.38	0.56	0.84	0.55	0.69	0.68	0.7	0.86	1.04	1.2	1.05	0.66	0.6	0.63	0.34	2.56	1.48	1.16	0
14080	Fabp1	39.72	627.96	4989.09	7.94492	3	Cluster Enriched	4.93e-10	1.01	1.68	14.13	38.08	13.32	7.16	38.52	86.44	59.27	23.89	37.88	84.26	27.25	19.1	143.76	37.22	88.68	278.29	279.28	288.45	166.41	229.01	459.54	1201.76	1367.75	1373.05	1766.12	2122.85	1420.6	3900.39	1989.39	2664.22	3484.7	2787.43	3227.21	5579.85	4351.28	4701.68	5787.33	6833.69	8469.81
56473	Fads2	0.27	0.96	2.34	2.4375	3	Cluster Enriched	3.99e-08	0.19	0.31	0.31	0.42	0.27	0.26	0.39	0.21	0.12	0.18	0.37	0.13	0.19	0.31	0.32	0.34	0.25	0.38	0.83	1.13	0.43	0.3	1.04	0.79	1.78	1.71	2.59	3.55	2.94	3.39	2.01	4.1	3.98	1.74	2.34	1.68	2.71	3.15	2.77	2.36	1.52
106052	Fbxo4	0	0	0.01	Inf	3	Cluster Enriched	0.485959	0	0	0	0	0	0	0	0	0	0	0	0	0	0	0	0	0	0	0	0	0	0	0	0	0	0	0	0	0	0	0	0	0	0	0	0	0	0	0	0.21	0
14148	Fdx1	0.36	2.74	11.12	4.05839	3	Cluster Enriched	2.66e-06	0	0	0	0	0	0	0	0	0	0	0	0	3.2	0	2.16	0	0	0	4.83	2.76	2.73	3.98	4.4	3.88	7.33	0	2.94	0	0	0	8.55	0	4.79	7.53	20.8	7.72	15.71	16.25	18.3	17.97	13.51
14257	Flt4	0	0.02	0.12	6	3	Cluster Enriched	0.133893	0	0	0	0	0.01	0.01	0	0	0	0	0	0	0	0	0	0	0.01	0.02	0	0	0	0	0.15	0.01	0	0.01	0.04	0	0	0	0.07	0.63	0.62	0.69	0.06	0.02	0	0	0	0	0
14629	Gclc	0.37	0.7	8.26	11.8	3	Cluster Enriched	4.84e-10	0.28	0.24	0.7	0.23	0.33	0.3	0.37	0.35	0.36	0.27	0.29	0.48	0.36	0.28	0.75	0.26	0.36	1.1	0.37	0.26	0.36	0.53	0.72	0.67	0.83	1.53	1.37	2.07	2.58	3.38	2.17	5.7	4.58	7.61	12.4	12.08	8.55	12.75	10.69	16.29	6.45
14544	Gda	0	0.18	0.76	4.22222	3	Cluster Enriched	0.0472583	0	0	0	0	0	0	0	0	0	0.02	0	0.02	0	0	0	0	0.05	0.12	0.24	0.21	0.07	0	1.27	0.08	0.06	0	0.12	0	0.02	0.08	5.44	0	0.03	0.11	0.05	0.12	0.72	0.59	0.57	0.72	1.32
14571	Gpd2	0.32	0.95	6.17	6.49474	3	Cluster Enriched	1.26e-08	0.24	0.21	0.57	0.92	0.46	0.31	0.8	0.18	0.22	0.15	0.12	0.18	0.1	0.22	0.1	0.33	0.07	0.38	0.08	0.3	0.09	0.25	0.69	0.39	1.55	4.71	2.56	5.33	4.46	7.07	6.62	12.91	7.5	7.42	8.27	12.6	5.3	8.67	7.81	1.41	4.89
14775	Gpx1	15.68	11.51	70.5	4.49617	3	Cluster Enriched	0.000188881	12.57	14.32	13.36	13.59	19.53	16.49	16.93	13.14	16.99	20.61	16.15	14.41	22.39	16.23	8.5	14.02	15.43	7.47	7.62	11.97	5.82	10.25	16.48	7.78	17.44	14.22	9.56	13.67	13.86	30.76	35.17	23.78	12.32	38.44	36.59	92.65	68.49	103.32	68.47	137.3	252.79
50915	Grb14	0	0.04	0.14	3.5	3	Cluster Enriched	0.00180822	0	0	0	0	0	0	0	0	0	0	0	0	0	0	0	0	0	0	0	0	0	0.09	0	0.03	0.09	0.14	0.13	0.3	0.18	0.16	0.58	0.13	0.45	0.06	0	0.03	0.03	0.08	0.06	0	0.1
68312	Gstm7	2.87	9.35	49.27	5.26952	3	Cluster Enriched	0.000265195	0	0	0	0.91	2.31	1.1	1.86	5.65	4.09	1.83	3.75	6.96	2.28	1.84	10.51	2.88	7.29	10.9	7.77	8.5	7.41	7.71	10.1	6.69	15.48	12.56	14.87	5.33	12.78	12.66	13.2	10.58	11.19	12.76	14.06	12.85	42.02	129.57	103.76	69.85	36.58
14651	Hagh	0.63	3.03	20.86	6.88449	3	Cluster Enriched	8.81e-10	0.38	0.25	0.45	0.31	0.67	0.49	0.49	1.06	0.85	0.6	0.45	0.95	0.53	0.78	1.2	0.7	0.52	3.33	2.51	3.05	2.85	2.59	4.39	3.75	4.34	4.76	3.59	3.85	10.09	8.76	10.81	8.8	8.15	18.04	20.3	18.96	26.53	36.44	20.43	31.26	25.6
15360	Hmgcs2	6.96	287.04	1037.34	3.61392	3	Cluster Enriched	2.84e-06	0.66	0.45	2.23	2.14	1.73	1.29	3.06	15.39	8.87	10.39	6.08	8.58	7.67	5.51	30.3	16.17	22.17	82.48	110.95	124.29	58.98	161.45	242.99	276.18	766.29	781.95	800.53	1041.41	1063.54	1196.24	1876.1	1371.21	1615.54	2173.98	2408.41	1807.98	830.06	792.94	683.2	255.92	358.91
15953	Ifi47	0.09	1.45	5.38	3.71034	3	Cluster Enriched	0.000233895	0.02	0.03	0.15	0.05	0.05	0.11	0.04	0.15	0.08	0.04	0.09	0.2	0.02	0.05	0.21	0.04	0.06	0.73	1.99	2.22	1.1	0.79	0.89	0.43	2.14	4.83	2.17	7.57	7.35	17.48	6.82	16.51	6.08	5.94	7.69	5.1	1.42	1.58	1.14	4.12	3.87
16668	Krt18	5.03	23.65	101.95	4.31078	3	Cluster Enriched	3.63e-13	1.73	3.21	3.77	3.91	2.56	4.11	5.12	6.46	6.43	5.11	5.82	8.29	5.21	4.88	8.86	6.6	5.96	23.99	15.89	23.14	13.45	22.99	43.11	17.18	41.55	38.5	31.39	41.35	51.83	58.98	72.03	91.89	74.64	157.64	179.78	94.13	124.09	96.05	105.67	129.72	114.69
225010	Lclat1	0	0	0.35	Inf	3	Cluster Enriched	3.79e-05	0	0	0	0	0	0	0	0	0	0	0	0	0	0	0	0	0	0	0	0	0	0	0	0	0	0	0	0	0.31	0.38	0.18	0.25	0.47	0	0.53	0.48	0.25	0.2	0.15	0.95	0
100017	Ldlrap1	0.1	0.05	0.23	2.3	3	Cluster Enriched	0.275119	0.1	0	0.07	0.2	0.16	0.05	0	0.19	0.15	0.1	0.05	0.08	0.1	0.12	0.09	0.3	0.17	0.11	0	0	0	0	0	0	0	0	0	0	0	0	0	0	0	0	0	0	0	0.65	0.92	1.72	0
16890	Lipe	0	0	0.01	Inf	3	Cluster Enriched	0.115568	0	0	0	0	0	0	0	0	0	0	0	0	0	0	0	0	0	0	0	0	0	0	0	0	0.02	0	0.01	0	0.02	0.02	0.01	0	0.01	0	0	0	0.1	0.01	0	0	0
76483	Lmf1	0.06	0.25	1.13	4.52	3	Cluster Enriched	2.53e-12	0	0	0	0.03	0.07	0	0.1	0.08	0	0.06	0.11	0	0.09	0.11	0.31	0.13	0.15	0.32	0	0	0	0.36	0.55	0.24	0.15	0.82	0.31	1.51	1.17	0.92	0.48	1.3	0.71	1.21	2.01	1.24	0.61	1.47	0.56	0.9	1.27
380928	Lmo7	0	0.01	0.06	6	3	Cluster Enriched	0.219847	0	0	0	0	0	0	0	0	0	0	0	0	0	0	0	0	0	0	0.01	0.01	0.04	0.01	0.01	0	0	0.02	0.03	0.04	0	0.01	0.03	0.03	0.02	0	0.61	0.02	0.09	0.03	0	0	0.02
66887	Lonp2	0.21	0.48	1.6	3.33333	3	Cluster Enriched	1.61e-12	0.14	0.16	0.14	0.03	0.07	0.84	0.27	0.4	0.06	0.05	0.21	0.3	0.22	0.16	0.06	0.13	0.13	0.3	0.21	0.23	0.13	0.42	0.63	0.34	0.81	1.73	0.67	2.13	1.34	1.56	1.57	1.72	2.09	1.82	1.29	2.27	1.43	2.11	1.61	1.55	1.03
107321	Lpxn	0	0	0.27	Inf	3	Cluster Enriched	0.513151	0	0	0	0	0	0	0	0	0	0	0	0	0	0	0	0	0	0	0	0	0	0	0	0	0	0	0	0	0	0	0	4.78	0.03	0	0	0	0	0	0	0	0
14924	Magi1	0	0	0.04	Inf	3	Cluster Enriched	0.015351	0	0	0	0	0	0	0	0.01	0.01	0	0	0	0	0	0	0	0.01	0.02	0	0	0	0	0	0	0.02	0	0.01	0	0	0	0.01	0.03	0.03	0.11	0.26	0.05	0.11	0	0.05	0.08	0
228607	Mavs	0.31	0.58	1.67	2.87931	3	Cluster Enriched	3.38e-07	0.18	0.16	0.24	0.18	0.23	0.35	0.25	0.43	0.47	0.13	0.27	0.43	0.36	0.22	0.72	0.28	0.27	0.64	0.32	0.45	0.6	0.41	0.62	0.63	0.87	0.45	1.4	0.39	0.49	1.01	1.1	0.79	1.67	1.26	0.85	1.42	1.62	3.4	2.83	2.66	1.54
68995	Mcts1	0.88	1.38	3.13	2.26812	3	Cluster Enriched	0.0207622	1.49	0.85	2.66	0.39	0.4	1.37	0.88	0.28	0.22	0.54	1.79	0.33	1.1	0.38	0.54	0.5	0.64	0.9	0.78	0.63	0.42	0.42	1.33	1.88	2.55	4.94	1.59	1.36	0.92	2.11	6.07	4.05	2.75	7.87	2.57	12.98	2.26	0.5	1.01	1.89	2.19
26922	Mecr	0.34	0.93	2.18	2.34409	3	Cluster Enriched	3.9e-10	0.23	0.26	0.21	0.29	0.36	0.43	0.48	0.54	0.42	0.12	0.19	0.56	0.22	0.28	0.56	0.33	0.16	1.13	0.5	1.02	0.78	0.69	1.32	1.16	1.22	1.59	1.27	0.95	1.47	1.52	1.9	0.83	2.05	2.32	1.88	1.97	1.68	2.95	2.73	2.86	1.87
70152	Mettl7a1	0.16	0.84	5.42	6.45238	3	Cluster Enriched	5.64e-10	0	0	0	0	0	0	0.08	0.34	0.17	0.12	0.11	0.51	0.41	0.1	0.55	0.27	0.34	1.04	1.69	2.22	0.74	0.63	0.39	0.16	0.78	0.89	0.96	1.87	2.44	2.62	2.84	3.78	4.66	4.46	5.69	4.92	4.47	7.84	8.3	8.83	3.99
56615	Mgst1	2.09	24.85	237.72	9.5662	3	Cluster Enriched	4.67e-06	0	0	0	0	0	0	1.49	3.13	3.76	2.14	2.41	2.71	2.02	2.16	11.51	6.77	4.65	11.54	17.39	19.74	11.6	17.14	24.34	13.28	42.75	39.07	89.9	168.66	83.61	120.76	81	144.3	151.32	151.66	134.36	188.52	85.43	108.48	177.12	459.22	236.26
67074	Mon2	0.04	0.05	0.12	2.4	3	Cluster Enriched	0.00462186	0.03	0.03	0.02	0.03	0.01	0.03	0.07	0.03	0.02	0.05	0.06	0.03	0.03	0.02	0.07	0.06	0.02	0.03	0.03	0.05	0.03	0.03	0.05	0.03	0.04	0.08	0.15	0.1	0.07	0.11	0.12	0.04	0.2	0.2	0.17	0.04	0.15	0.16	0.04	0.01	0.46
67111	Naaa	0	0	0.07	Inf	3	Cluster Enriched	0.0115851	0	0	0	0	0	0	0	0	0	0	0	0	0	0	0	0	0	0	0	0	0	0	0	0	0	0	0	0.04	0.07	0.1	0.15	0.26	0.35	0	0.1	0.16	0	0	0	0	0
56174	Nagk	0.13	0.62	1.3	2.09677	3	Cluster Enriched	0.0073977	0.04	0	0.02	0.05	0.04	0.67	0.15	0.2	0.07	0.17	0.11	0.13	0.06	0.12	0.14	0.33	0.14	0.37	0.31	0.97	0.42	0.44	0.56	0.31	0.36	2.71	0.46	0.84	1.36	2.69	1.67	4.84	1.26	0.73	4.13	2.17	0.43	0.6	0.48	0.53	0.62
67130	Ndufa6	2.31	5.93	15.19	2.56155	3	Cluster Enriched	1.62e-13	1.99	1.67	3.4	2.63	1.5	2.9	1.56	3.01	2.44	1.43	2.29	2.97	2.54	1.16	3.11	2.58	3.44	5.35	2.16	4.13	4.91	3.48	6.88	5.03	12.19	12.68	8.28	7.7	12.57	15.82	20.19	11.05	10.74	13.4	18.72	19.42	14.54	14.78	14.32	19	14.46
66916	Ndufb7	0.61	2.98	9.7	3.25503	3	Cluster Enriched	3.36e-11	0.16	0.28	0	0	0.77	0.54	0.73	1.37	0.84	0.74	0	1.1	0.83	0.6	1.24	0.4	0.39	1.23	0.69	1.21	1.07	1.79	2.48	3.17	8.37	6.7	8.3	7.31	4.48	7.47	7.91	8.41	12.62	6.84	13.07	4.47	8.83	9.25	10.23	14.69	13.8
18032	Nfix	0	0	0.03	Inf	3	Cluster Enriched	0.0741161	0	0	0	0	0	0	0	0	0	0	0	0	0	0	0	0	0	0	0	0	0	0	0	0	0	0	0	0	0	0	0	0	0	0.14	0.19	0.06	0	0	0	0	0
18113	Nnmt	0	0	0.51	Inf	3	Cluster Enriched	0.0793672	0	0	0	0	0	0	0	0	0	0	0	0	0	0	0	0	0	0	0	0	0	0	0	0	0	0	0	0	0	0	0	0	0	0	0	0	0	0	0	3.51	2.74
18115	Nnt	0.23	0.66	1.99	3.01515	3	Cluster Enriched	0.106413	0.04	0.16	0	0	0	0	0	0	0	0.47	0.53	0	0.56	0.39	1.36	0	0	0	0	0	0	1.81	2.24	0	1.11	2.71	0	0	0	0	8.18	0	9.11	0	0	0	0	0	0	5.65	6.28
67993	Nudt12	0.08	0.65	2.48	3.81538	3	Cluster Enriched	3.13e-11	0	0	0	0	0	0	0.42	0	0.12	0	0	0	0.03	0.33	0.25	0.03	0.27	0.08	0.59	0.39	0.23	0.37	0.76	0.74	1.67	1.72	0.99	1.55	1.5	1.27	1.84	2.07	2.34	4.13	2.21	4.2	2.39	3.47	2.21	2.33	1.8
18293	Ogdh	2.31	4.95	10.55	2.13131	3	Cluster Enriched	5.74e-07	2.18	1.8	2.67	1.63	2.61	2.27	1.51	2.9	2.3	1.79	2.38	3.53	2.72	1.77	2.57	2.69	1.93	4	2.99	3.25	4.18	3.66	5.93	4.26	10.87	9.21	6.47	9.61	6.97	6.26	12.21	10.74	7.48	12.31	7.28	7.33	8.81	8.48	7.14	12.85	7.24
18405	Orm1	0	0	0.08	Inf	3	Cluster Enriched	0.306708	0	0	0	0	0	0	0	0	0	0	0	0	0	0	0	0	0	0	0	0	0	0	0	0	0	0	0	0	0	0	0	0	0	0	0	0	0	0	0	0	0
64291	Osbpl1a	0.03	0.09	0.37	4.11111	3	Cluster Enriched	2.33e-07	0.01	0	0.03	0	0.01	0.02	0.01	0.05	0.01	0.02	0.01	0.13	0.01	0.01	0.08	0.01	0.04	0.1	0	0.04	0.17	0.02	0.18	0.13	0.08	0.22	0.13	0.08	0.28	0.14	0.3	0.21	0.13	0.3	0.47	0.36	0.25	0.86	0.6	0.22	0.29
237542	Osbpl8	0.05	0.01	0.14	2.8	3	Cluster Enriched	0.362172	0.04	0	0.01	0.06	0.03	0.02	0.19	0.02	0.02	0.09	0.11	0.02	0.02	0.06	0.01	0.02	0	0.02	0	0	0	0	0.05	0.01	0	0	0	0	0	0	0	0.02	0.05	0.17	0.02	0.07	0.02	0.07	0.05	0.15	0.11
18438	P2rx4	0.01	0.02	0.12	6	3	Cluster Enriched	0.00247329	0	0	0	0	0	0	0	0	0	0	0.17	0.03	0	0	0	0	0	0	0	0	0	0	0	0	0.23	0	0.07	0.11	0.26	0.21	0.21	0.37	0.21	0.07	0	0.16	0.24	0	0.23	0	0
100163	Pafah2	0.01	0.18	0.76	4.22222	3	Cluster Enriched	2.08e-06	0	0	0	0	0	0	0.01	0.04	0.03	0	0	0	0.02	0	0.04	0.07	0	0.23	0.2	0.09	0.09	0	0.09	0.44	0.57	0.22	0.16	0.24	0.16	0.05	0.88	0.16	0.19	0.8	0.41	0.61	1.72	1	1.04	1.15	0.68
18559	Pctp	0.29	3.9	8.07	2.06923	3	Cluster Enriched	0.000110281	0	0.46	0.19	0.11	0.17	0.12	0.16	0.35	0.6	0.08	0.46	0.43	0.17	0.21	0.77	0.24	0.51	3.55	2.27	2.56	1.07	2.19	3.76	2.97	7.72	12.64	7.34	14.91	13.45	8.38	17.29	21.5	13.38	12.82	9.84	4.3	1.94	1.97	3.34	2.54	3.56
16922	Phyh	0.22	2.98	8.7	2.91946	3	Cluster Enriched	2.54e-11	0.04	0.05	0	0	0.07	0.02	0.06	0.64	0.28	0.17	0.19	0.47	0.28	0.12	0.84	0.61	0.48	1.52	0.81	1.51	1.2	2.26	3.61	5.54	5.67	7.09	5.47	5.37	4.4	6.31	10.69	8.33	8.38	14.56	13.82	13.93	8.75	5.25	4.53	11.09	8.09
67451	Pkp2	0.04	0.21	0.54	2.57143	3	Cluster Enriched	1.16e-10	0	0	0	0	0.03	0.05	0.01	0.05	0.09	0.01	0.02	0.06	0.04	0.05	0.16	0.06	0.13	0.13	0.16	0.16	0.35	0.08	0.3	0.42	0.28	0.33	0.16	0.19	0.37	0.54	0.55	0.61	0.68	0.52	0.65	0.64	0.66	0.64	1.15	0.46	0.53
330260	Pon2	0.43	0.61	1.38	2.2623	3	Cluster Enriched	2.13e-08	1.04	0.33	0.64	0.58	0.38	0.24	0.33	0.62	0.53	0.1	0.45	0.33	0.36	0.3	0.25	0.35	0.72	0.82	0.37	0.65	0.37	0.61	0.45	0.35	0.72	1.11	0.84	1.68	1.05	1.22	1.25	2.28	1.52	1.49	1.88	1.58	0.7	1.07	0.89	2.18	1.2
67895	Ppa1	7.3	21.97	60.45	2.75148	3	Cluster Enriched	1.12e-10	6.31	4.09	11.71	7.47	8.01	4.59	8.35	9.97	10.39	3.42	2.97	12.56	5.24	3.32	11.09	8.47	7.12	14.37	7.27	11.53	13.39	12.15	30.6	20.92	42.51	48	47.26	23.14	23.31	56.71	86.41	62.32	49.18	92.36	43.88	60.74	84.05	78.87	78.02	83.77	63.8
19024	Ppfibp2	0.02	0.09	0.42	4.66667	3	Cluster Enriched	1.85e-12	0	0	0	0	0.01	0.05	0.01	0.01	0.09	0.01	0.02	0.03	0.01	0	0.02	0.02	0.04	0.06	0.08	0.03	0.04	0.09	0.1	0.11	0.17	0.15	0.15	0.28	0.21	0.26	0.17	0.59	0.43	0.42	0.38	0.73	0.32	0.24	0.62	0.49	0.39
19043	Ppm1b	0.22	0.44	1.78	4.04545	3	Cluster Enriched	2.47e-05	0.11	0.07	0.38	0.09	0.26	0.26	0.07	0.32	0.24	0.27	0.09	0.32	0.34	0.07	0.34	0.2	0.26	0.51	0.42	0.37	0.36	0.33	0.37	0.51	0.95	0.6	0.44	1.11	0.58	1.6	1.2	0.5	6.48	1.52	1.8	3.18	1.33	1.56	2.35	1.77	0.87
226849	Ppp2r5a	0.17	0.43	1.19	2.76744	3	Cluster Enriched	0.187401	0.06	0.08	0.18	0.43	0.08	0.16	0.22	0.28	0.27	0.06	0.14	0.38	0.04	0.12	0.09	0.23	0.15	0.92	0.12	0.13	0.66	0.05	0.14	1.03	0.32	0.14	1.24	2.11	0.2	0.23	0.24	0.37	0.38	0.49	0.26	0.61	0.28	9.77	0.44	0.22	0.2
20778	Scarb1	0.05	0.19	0.8	4.21053	3	Cluster Enriched	3.81e-10	0	0	0	0	0	0	0	0	0	0	0.05	0.12	0.32	0	0.23	0.13	0.29	0.25	0.09	0.29	0	0	0	0	0.56	0.43	0.28	0.66	0.57	0.79	1.34	1.06	0.74	1.14	1.5	1.14	0.65	0.64	0.91	0.86	0.44
257635	Sdsl	0	0.12	0.33	2.75	3	Cluster Enriched	0.00188546	0	0	0	0	0	0	0	0	0	0	0	0	0	0	0	0	0.01	0.14	0	0.07	0.08	0.08	0.19	0.12	0.49	0	0.21	0	0	0	0.64	0	0.13	0.35	0.49	0.34	0.34	0.13	0.3	0.62	0.14
67815	Sec14l2	0.42	3.7	31.13	8.41351	3	Cluster Enriched	2.6e-13	0.04	0.13	0.55	0.17	0.27	0.43	0.46	0.37	0.58	0.53	0.44	0.49	0.56	0.38	0.86	0.47	0.59	2.31	2.99	3.17	1.56	2.6	3.32	3.33	8.62	7.59	7.82	12.48	12.02	14.66	23.45	19.47	21.79	34.61	27.59	33.75	33.22	50.12	49.54	33.02	39.67
20341	Selenbp1	3.73	31.64	110.68	3.4981	3	Cluster Enriched	7.85e-05	0.98	0.96	2.05	1.26	1.73	1.14	2.41	6.58	3.61	4.4	3.26	5.98	3.55	2.48	15.52	9.26	9.4	26.98	39.94	31.16	20.44	34.05	39.36	26.92	64.81	44.3	33.05	37.29	31.71	31.99	49.58	31.75	26.58	70.77	81.85	65.8	147.95	124.74	112.12	172.19	65.3
81535	Sgpp1	0	0	0.02	Inf	3	Cluster Enriched	0.0439787	0	0	0	0	0	0	0	0	0	0	0	0	0	0	0	0	0	0	0	0	0	0	0	0	0	0	0	0	0	0	0	0	0	0.06	0.07	0.15	0	0	0	0	0
64384	Sirt3	0	0.05	0.31	6.2	3	Cluster Enriched	0.000144552	0	0	0	0	0	0	0	0	0	0	0	0	0	0	0	0	0	0	0	0	0	0	0	0	0	0.3	0.26	0	0.37	0.04	0.55	0.79	0.7	0.73	0.71	0.09	0.35	0.21	0.33	0.31	0
67863	Slc25a11	0.78	3.72	9.79	2.63172	3	Cluster Enriched	8.63e-12	0.21	0.43	0.41	0.55	0.27	0.48	0.63	0.58	0.52	0.3	1	1.99	0.84	1	2.55	1.17	1.17	4.24	1.59	3.52	3.56	1.78	3.4	3.55	8.62	4.55	7.51	6.67	8.14	11.53	8.37	8.16	11.09	8.71	11.38	19	8.21	13.71	12.9	6.48	8.54
78830	Slc25a12	0.48	2.17	4.37	2.01382	3	Cluster Enriched	2.17e-10	0.46	0.44	0.33	0.56	0.42	0.4	0.4	0.49	0.48	0.67	0.44	0.31	0.66	0.46	0.69	0.65	0.86	1.21	1.28	1.23	0.9	1.58	2.77	2.06	5.7	3.94	3.85	4.33	4.2	4.6	8.1	4.4	3.46	5.7	5.32	5.12	4.5	3.94	3.73	5.16	3.47
11988	Slc7a2	0	0.03	0.08	2.66667	3	Cluster Enriched	0.056955	0	0	0	0	0	0	0	0	0	0	0	0	0	0	0	0	0	0	0	0	0	0.09	0.26	0	0	0	0	0	0	0	0	0	0	0.28	0.08	0	0	0	0	0.26	0.04
24059	Slco2a1	0	0	0.02	Inf	3	Cluster Enriched	0.13708	0	0	0	0	0	0	0	0	0	0	0	0	0	0	0	0	0	0	0	0	0	0	0	0	0	0	0	0	0	0	0	0	0	0	0	0	0	0	0	0	0
67826	Snap47	0.05	0.06	0.33	5.5	3	Cluster Enriched	8.69e-09	0.03	0.11	0.15	0.01	0.05	0.05	0.03	0.03	0.03	0.09	0.04	0.03	0.06	0.01	0.04	0	0.02	0.04	0.02	0.07	0	0	0.04	0.14	0.09	0.1	0.14	0.23	0.18	0.2	0.05	0.22	0.21	0.36	0.19	0.26	0.44	0.66	0.51	0.32	0.28
234214	Sorbs2	0	0.04	0.37	9.25	3	Cluster Enriched	8.49e-07	0	0	0	0	0	0	0	0	0	0	0	0	0.01	0	0.02	0.02	0.07	0.03	0.03	0	0.01	0	0.04	0.07	0.1	0.12	0.05	0.04	0.09	0.32	0.09	0.24	0.36	0.2	0.2	0.63	0.28	0.89	0.49	0.39	0.15
268656	Sptlc1	0.03	0.01	0.11	3.66667	3	Cluster Enriched	0.183195	0	0	0	0.16	0	0.01	0.06	0.03	0.03	0.02	0.11	0	0.03	0.05	0	0	0	0	0.03	0	0.03	0	0	0	0	0.08	0.03	0.13	0.2	0	0.1	0.27	0.93	0.19	0.04	0.18	0	0	0	0	0
20866	Stim1	0.15	0.44	1.18	2.68182	3	Cluster Enriched	3.12e-10	0.05	0.07	0.04	0	0.1	0.06	0.09	0.17	0.26	0.1	0.07	0.48	0.13	0.04	0.52	0.12	0.14	0.42	0.22	0.49	0.07	0.4	0.49	0.67	0.62	0.56	1.02	0.79	1.33	1.06	0.91	0.7	1.88	1.09	1.62	1.65	0.92	1.05	1.34	0.44	0.61
116873	Stim2	0.02	0	1.01	50.5	3	Cluster Enriched	0.0259592	0.02	0.01	0	0.02	0	0.02	0	0	0	0	0	0	0.01	0.25	0	0	0	0	0	0	0	0	0	0	0	0	0	0	0.01	0.01	0.09	0	0.02	0.36	2.15	1.89	4.37	0.03	4.39	0.03	4.35
211389	Suox	0.29	1.26	16.41	13.0238	3	Cluster Enriched	9.6e-10	0.08	0.23	0.09	0.21	0.14	0.14	0.21	0.42	0.33	0.34	0.36	0.5	0.42	0.37	0.58	0.63	0.61	1.18	0.86	0.89	0.19	1.04	1	1.21	2.33	3.32	1.84	4.65	5.21	5.19	11.21	8.66	5.61	31.73	23.08	18.94	25.96	24.72	19.11	25.04	27.39
19027	Sypl	0.3	0.44	1.34	3.04545	3	Cluster Enriched	1.02e-05	0.41	0	0.43	0	0.13	0.38	0.43	0.33	0.57	0.23	0.55	0.53	0.43	0.09	0	0	0.61	0.68	0	0	0	0.57	1.4	0	0	1.01	0.96	2.31	1.78	1.9	1.57	0	1.44	2.5	0	1.88	0.78	0.78	1.8	0.9	1.81
21356	Tapbp	0.03	0.46	1.45	3.15217	3	Cluster Enriched	9.59e-05	0	0	0	0	0	0	0.08	0.07	0.02	0.02	0.06	0.04	0	0.02	0.07	0.06	0.05	0.2	0.13	0.35	0.13	0.17	0.18	0.7	0.47	1.94	1.14	1.6	0.57	3.22	0.92	3.63	1.54	4.65	0.6	0.8	0.7	1.06	1.65	1.17	0.74
110960	Tars	1.83	2.4	4.82	2.00833	3	Cluster Enriched	5.99e-07	1.57	2.62	2.63	1.88	2.25	1.81	1.77	1.48	2.09	1.33	1.49	1.87	1.51	1.66	1.51	1.28	1.4	2.71	3.21	2.36	1.8	2.06	2.77	1.65	3.8	3.27	2.51	4.09	3.05	2.58	3.86	2.46	2.33	3.36	3.36	4.02	3.52	7.87	6.87	7.39	6.19
73130	Tmed5	0.87	4.04	11.63	2.87871	3	Cluster Enriched	0.000429075	0.69	0	0.38	0.5	2.86	0	0.55	2.89	0.38	0	0.45	3.64	0	0.43	0.26	4.75	1.46	7.58	1.04	0.66	7.16	0.75	1.13	7.89	1.88	4.72	9.4	2.76	12.88	17.74	2.84	18.46	16.99	2.52	6.5	42.11	10.8	11.58	4.28	14.84	1.76
67226	Tmem19	0	0	0.29	Inf	3	Cluster Enriched	0.0827523	0	0	0	0	0	0	0	0	0	0	0	0	0	0	0	0	0	0	0	0	0	0	0	0	0	0	0	0	0	0	0	0.37	0.25	0	0	0	0	0	0	0	0
68777	Tmem53	0	0	0.34	Inf	3	Cluster Enriched	0.0310408	0	0	0	0	0	0	0	0	0	0	0	0	0	0	0	0	0	0	0	0	0	0	0	0	0	0	0	0.08	0.06	0.13	0.63	0.07	0.11	1.28	0.16	0.32	0.18	0.1	0.19	2.36	0.22
208263	Tor1aip1	0.07	0.2	0.47	2.35	3	Cluster Enriched	6.25e-06	0.11	0.04	0.04	0.06	0.06	0	0.17	0.06	0.07	0.08	0.13	0.07	0.13	0.03	0.05	0.17	0.05	0.08	0.33	0.12	0.11	0.16	0.23	0.17	0.4	0.28	0.32	0.57	0.63	0.72	0.55	0.84	0.89	0.39	0.31	0.86	0.2	0.2	0.22	0.89	0.07
12751	Tpp1	0.27	1.02	2.35	2.30392	3	Cluster Enriched	1.48e-06	0.18	0.28	0.52	0.14	0	0.28	0.23	0.29	0.5	0.34	0.3	0	0.36	0.26	0.31	0.36	0.42	0.72	0.71	0.73	0.52	1.07	1.79	1.05	0	1.7	3.21	2.13	2.68	2.7	2.82	1.91	3.4	2.01	4.59	2.38	0.65	1.07	0.9	1.55	1.05
78232	Trappc6b	0.02	0	0.16	8	3	Cluster Enriched	0.00379121	0	0	0	0	0	0	0	0	0	0.13	0.07	0.06	0	0	0	0	0	0	0	0	0	0	0	0	0	0	0	0	0	0	0.09	0	0.55	0.55	0.33	0	0.17	0.03	0.38	0	0
74735	Trim14	0.06	0	0.55	9.16667	3	Cluster Enriched	0.00129849	0	0	0	0	0	0	0.12	0.03	0.68	0	0	0	0	0	0	0	0	0	0	0	0	0	0	0	0	0	0	0	0.59	0.39	0.13	0.14	0.41	0.8	0.7	0.46	0.5	2.46	0.48	0	0.32
69863	Ttc39b	0	0	0.25	Inf	3	Cluster Enriched	0.0915873	0	0	0	0	0	0	0	0	0	0	0	0	0	0	0	0	0	0	0	0	0	0	0	0	0	0	0	0	0	0	0	0	0	0	0	0	0	0	0	0.48	1.63
50500	Ttpa	0.08	1.88	21.52	11.4468	3	Cluster Enriched	0.000162301	0	0	0	0	0	0	0	0.09	0.22	0	0.09	0.18	0.08	0.04	0.52	0.24	0.15	1.09	0.92	1.2	0.78	1.45	2.39	1.65	4.87	5.03	2.79	4.66	23.07	4.65	11.93	60.26	4.47	8.05	5.81	36.41	40.03	16.37	56.28	11.1	13.65
234729	Vac14	0.54	0.48	1.54	2.85185	3	Cluster Enriched	0.0253405	0.09	0.15	1.16	1.61	0.09	0.12	1.67	0.07	0.04	0.11	0.04	1.88	0.15	0.03	0.9	1.88	2.29	0.06	0.25	0.02	0.08	0.36	0.06	0.41	0.06	0	0.28	0.1	0.16	0.54	1.05	1.02	4.55	3.71	0.12	3.22	0.76	0.81	3.49	0	0.71
22351	Vill	0	0.05	0.11	2.2	3	Cluster Enriched	0.425927	0	0	0	0	0	0	0	0	0	0	0	0	0	0	0	0.08	0	0.11	0.05	0.04	0.06	0.04	0.06	0.02	0.02	0.06	0.08	0.05	0.07	0.05	0.02	1.5	0.09	0.09	0.04	0.04	0	0	0	0	0
22361	Vnn1	0	0.03	0.09	3	3	Cluster Enriched	0.0679296	0	0	0	0	0	0	0	0	0	0	0	0	0	0	0	0.01	0.02	0	0.01	0.11	0.03	0	0	0	0	0.11	0.06	0.35	0.06	0.08	0	0.59	0.05	0	0	0	0	0	0	0.2	0.09
20479	Vps4b	0.34	0.47	1.4	2.97872	3	Cluster Enriched	0.000402253	0.36	0.22	0.61	0.24	0.32	0.35	0.32	0.24	0.29	0.2	0.3	0.42	0.73	0.11	0.45	0.32	0.24	0.65	0.21	0.39	0.59	0.2	0.15	0.65	0.82	0.6	0.78	0.33	2.41	0.67	0.52	3.17	2.44	3.38	1.41	2.37	0.7	0.54	0.55	2.36	0.52
268752	Wdfy2	0.02	0.02	0.1	5	3	Cluster Enriched	0.478874	0	0	0	0	0	0	0.14	0.03	0.01	0.02	0	0.03	0	0	0	0.04	0.02	0.02	0	0	0	0	0	0	0.07	0.02	0.02	1.42	0.04	0	0.05	0.06	0.08	0.02	0.09	0.02	0	0	0	0	0
107568	Wwp1	0	0	0.01	Inf	3	Cluster Enriched	0.64976	0	0	0	0	0	0	0	0	0	0	0.01	0.03	0	0	0	0	0	0	0	0.02	0.01	0	0	0	0	0	0	0	0.01	0.05	0	0	0	0	0.02	0.02	0	0	0	0	0
98999	Znfx1	0.01	0.01	0.07	7	3	Cluster Enriched	0.0169724	0	0	0	0.01	0.01	0.03	0	0	0	0.01	0.02	0.01	0.01	0.02	0	0	0	0	0.01	0	0.01	0	0	0	0.01	0.01	0.03	0.12	0.02	0.04	0.04	0.01	0.01	0.05	0.18	0.03	0.04	0.03	0.06	0.01	0.01
269774	Aak1	0.09	0.07	0.03	2.33333			0.0109055	0.07	0.06	0.23	0.09	0.09	0.07	0.02	0.11	0.1	0.08	0.03	0.07	0.08	0.03	0.16	0.02	0.04	0.26	0.08	0.02	0.12	0.01	0.03	0.05	0.04	0.1	0.05	0.12	0.08	0.04	0.01	0	0.04	0.01	0.02	0	0	0	0	0	0.06
24015	Abce1	2.74	2.25	2.52	1.0873			0.376132	2.33	2.95	4.87	3.2	4.32	3.31	2.63	2.86	2.76	1.72	1.74	2.71	2.32	1.58	1.78	1.82	1.72	2.07	1.15	1.53	1.34	1.75	3.45	2.14	2.59	4.26	3.22	1.66	2.44	3.33	1.76	2.75	3.1	2.56	3.67	3.09	3.36	2.63	2.56	1.53	1.44
11308	Abi1	0.21	0.21	0.16	1.3125			0.470426	0.15	0.16	0.38	0.04	0.21	0.26	0.06	0.33	0.43	0.2	0.13	0.22	0.12	0.14	0.31	0.11	0.12	0.56	0.07	0.16	0.04	0.22	0.28	0.14	0.17	0.29	0.31	0.19	0.13	0.15	0.26	0.26	0.28	0.19	0.32	0.14	0.22	0.12	0.09	0.1	0.15
107476	Acaca	0.23	0.5	0.81	2.17391			6.21e-06	0.12	0.23	0.3	0.22	0.19	0.25	0.21	0.24	0.23	0.16	0.25	0.36	0.2	0.16	0.37	0.2	0.35	0.62	0.62	0.57	0.38	0.5	0.83	0.36	0.57	0.47	0.5	0.53	0.31	0.42	0.54	0.51	0.68	0.5	0.57	0.38	0.75	1.49	1.52	0.68	1.01
26897	Acot1	1.17	4.03	2.24	1.91453			0.00297762	0.83	0.99	1.2	0.59	0.92	0.99	0.94	1.68	1.66	0.7	1.87	1.83	0.63	0.95	1.74	1.45	1.29	3.51	1.53	1.71	2.01	1.78	4.42	5.51	9.46	7.31	8.42	4.45	3.36	3.9	4.17	4.67	3.6	0	0	0	0.7	0.8	0	2.4	3.05
170789	Acot8	0.43	0.55	0.43	1.27907			0.881006	0.28	0.44	0.27	0.09	0.09	0.82	0.12	0.25	0.18	0.13	0.13	1.72	1.82	0.04	0.14	0.08	0.08	3.99	0.12	0.37	0.15	0.15	0.27	0.2	0.32	0.55	0.32	0.4	0.55	0.53	0.38	0.74	0.32	0.23	0.4	0.55	0.46	0.51	0.32	0.37	0.41
11432	Acp2	0.17	0.22	0.36	1.63636			0.189549	0	0	0	0.29	0.33	0.03	0.48	0	0.67	0.05	0.35	0.06	0.15	0.08	0.12	0.03	0.46	0.12	0	0.06	0.11	0.02	0.15	0.13	0.91	0.41	0.28	0.58	0.54	0.69	0.72	0.99	1.02	0.64	0.21	0.16	0.18	0.22	0.15	0.16	0.02
11566	Adss	1.26	0.88	0.91	1.38462			0.157633	1.19	0.6	3.21	1.54	2.07	1.43	0.86	1.48	1.63	0.48	0.28	1.11	0.82	1.2	0.94	0.79	1.19	1.22	0.73	0.71	0.64	0.51	0.75	0.82	1.36	1.08	0.78	1.26	1.1	1.52	0.6	1.09	0.65	0.49	0.19	1.55	0.39	1.66	1.34	0.4	0.57
15463	Agfg1	0.57	0.31	0.22	1.83871			0.00017144	0.43	0.45	1.41	0.5	1.02	0.72	0.44	0.5	0.57	0.45	0.58	0.65	0.34	0.24	0.25	0.2	0.21	0.36	0.6	0.44	0.26	0.17	0.19	0.39	0.17	0.24	0.51	0.2	0.27	0.24	0.23	0.17	0.39	0	0.42	0.4	0.19	0.37	0.25	0.22	0.12
66395	Ahnak	0.15	0.48	0.42	2.8			1.52e-05	0.15	0.19	0.28	0.13	0.12	0.17	0.07	0.23	0.18	0.16	0.09	0.1	0.13	0.05	0.24	0.18	0.18	0.58	0.49	0.43	0.57	0.61	0.45	0.66	0.51	0.56	0.57	0.38	0.52	0.79	0.37	0.69	0.81	0.53	0.53	0.49	0.26	0.23	0.41	0.21	0.35
69748	Aldh16a1	0.54	0.92	1.84	1.7037			7.45e-06	0.22	0.16	0.87	0.25	0.48	0.39	0.38	0.96	0.89	0.29	0.71	0.6	0.52	0.48	0.84	0.37	0.97	2.5	0.23	0.57	0.53	0.26	1.76	0.17	1.07	1.18	1.4	0.89	1.86	1.46	2.5	1.24	2.21	3.01	1.37	1.11	1.26	1.42	1.23	1.66	1.55
72535	Aldh1b1	7.04	35.13	60.21	4.99006			3.12e-09	1.31	5.8	2.62	3.59	3.65	3.66	6.75	11.07	7.58	9	9.05	11.27	5.44	6.6	18.28	12.25	11.82	26.84	30.64	22.32	25.79	29.43	35.93	33.1	89.43	52.14	51.91	63.44	56.03	43.33	74.28	40	47.17	98.87	73.58	58.35	94.29	76.43	55.66	79.04	61.06
11684	Alox12	0.03	0.06	0	Inf			0.127629	0.03	0.02	0.12	0.05	0.11	0.06	0.01	0	0.04	0	0	0	0	0	0	0	0	0	0	0	0	0	0.14	0.46	0.01	0	0.13	0	0	0	0	0	0	0	0	0	0	0	0	0	0
224650	Anks1	0.01	0.02	0.01	2			0.295938	0	0	0	0	0.01	0.01	0.01	0.01	0.01	0.01	0	0.01	0.01	0.01	0.01	0	0.01	0.02	0.01	0	0.01	0.01	0.03	0.12	0	0.01	0.05	0.04	0	0.02	0.02	0.02	0.11	0.01	0.01	0.01	0.01	0.01	0	0	0
11792	Apex1	1.99	2.62	2.1	1.24762			0.316594	1.53	1.38	6.51	2.08	1.73	2.08	1.33	1.99	1.5	1.42	1.16	1.88	1.39	1.68	2.2	1.25	1.69	2.37	1.98	2.44	2.5	2.13	3.81	1.84	4.2	4.18	3.06	2.5	2.44	1.74	3.08	3.79	2.3	2.35	1.78	1.68	2	3.91	2.15	1.71	2.06
11800	Api5	1.68	1.18	0.93	1.42373			0.000875384	2.2	1.9	2.99	1.72	2.1	2.6	1.81	1.57	1.78	1	1.01	1.59	1.46	0.94	0.55	1.06	0.96	1.09	1.03	1.34	0.98	0.89	1.54	0.9	1.34	1.33	1.71	1.11	1.15	1.52	1.3	0.88	1.81	0.71	1.62	0.94	0.92	0.95	1.06	0.6	0.23
11806	Apoa1	12.61	43.63	79.56	3.45995			2.04e-09	9.38	8.34	10.39	8.2	10.8	8.81	7.83	23.35	15.09	9.13	10.73	21.04	2	2.82	41.25	14.79	21.82	63.94	32.55	43.55	47.48	45.88	82.3	67.34	21.42	36.49	46.04	69.43	45.33	123.37	80.81	77.04	84.38	127.25	138.49	101.39	56.74	99.68	76.14	47.76	60.99
11808	Apoa4	2.3	6.67	9.03	2.9			0.0427541	1.94	2.47	2.2	1.6	2.8	1.76	1.29	2.69	2.79	2.31	1.44	4.71	0.23	0.27	6.05	2.34	3.93	3.22	1.58	1.65	1.58	7.16	7.4	13.1	13.94	11.47	12.65	17.65	6.79	16.5	35.16	20.2	12.5	24.09	6.84	3.52	2.11	2.44	2.25	2.58	1.62
73341	Arhgef6	0.03	0.04	0.01	3			0.182652	0.02	0.03	0	0.01	0.01	0	0.26	0.02	0	0.03	0	0.02	0.01	0.01	0.02	0.03	0.03	0.03	0.05	0	0.01	0.09	0.03	0.04	0.06	0.06	0.08	0.05	0.04	0.03	0	0	0	0.02	0.05	0	0.01	0	0.01	0	0
11886	Asah1	0.29	0.93	1.39	3.2069			2.34e-05	0.15	0.26	0.23	0.13	0.18	0.23	0.21	0.52	0.32	0.17	0.17	0.57	0.19	0.22	0.83	0.31	0.3	1.18	0.32	0.62	1.01	0.46	1.06	0.66	1.57	1.95	1.76	0.96	1.63	1.51	2.31	2.93	2.13	1.6	2.65	1.47	1.04	0.82	1.24	0.79	0.76
11933	Atp1b3	0.72	0.48	0.69	1.04348			0.0709098	0.67	0.57	1.09	1.1	1.12	0.89	0.61	0.58	0.4	0.74	0.42	0.68	0.66	0.5	0.75	0.34	0.48	0.9	0.54	0.23	0.35	0.54	0.53	0.29	0.43	0.65	0.45	0.64	0.53	0.98	0.77	0.57	0.3	0.55	0.5	0.65	0.91	0.8	0.89	0.46	0.15
381290	Atp2b4	0.4	0.27	0.05	5.4			0.00546805	0.08	0.19	1.42	0.32	0.68	0.87	0.3	0.27	0.69	0.08	0.25	0.13	0.34	0.18	0.19	0.07	1.13	0.14	0.08	0.55	0.25	0.47	0.22	0.13	0.06	0.06	0.09	0.06	0.07	0.02	0.08	0.19	0	0.05	0.01	0.06	0.09	0.04	0.04	0.04	0.08
11975	Atp6v0a1	0.26	0.27	0.18	1.03846			0.640282	0.14	0.12	0.23	0.11	0.33	1.7	0.11	0.21	0.15	0.13	0.16	0.12	0.14	0.14	0.14	0.1	0.18	0.18	0.19	0.17	0.14	0.1	0.22	1.2	0.25	0.25	0.21	0.16	0.25	0.2	0.3	0.33	0.2	0.22	0.1	0.07	0.18	0.13	0.12	0.1	0.11
73834	Atp6v1d	0.25	0.48	0.56	1.92			0.321687	0.06	0.43	0.75	0.15	0.13	0.38	0.12	0.11	0.17	0.12	0.11	0.52	0.24	0.28	0.15	0.17	0.29	0.93	0.53	0.27	0.15	0	0.43	0.63	0.55	0.8	0.99	0.7	0.41	1.07	0.58	0.23	0.35	0.18	0.6	3.62	0.13	0.83	0.75	0	0
66290	Atp6v1g1	1.52	2.92	3.56	1.92105			0.00371963	1.63	1.68	2.89	1.84	1.42	1.2	1.6	1.44	0.99	1.05	0	1.79	1.26	1.6	2.37	0.8	1.57	2.3	2.8	1.74	1.9	1.82	4.25	6.23	2.84	3.67	5.15	4.39	4.09	7.5	4.5	5.5	6.28	3.84	4.76	5.55	1.01	3.51	3.11	1.75	1.22
224727	Bag6	0.7	0.47	0.44	1.48936			0.137088	0.64	0.73	1.47	0.77	0.74	0.93	0.57	0.67	0.84	0.39	0.72	0.55	0.6	0.53	0.42	0.38	0.47	0.65	0.4	0.68	0.58	0.27	0.36	0.27	0.53	0.61	0.41	0.48	0.38	0.34	2.34	0.78	0.48	0.5	0.45	0.33	0.3	0.26	0.26	0.14	0.18
70350	Basp1	0.25	0.5	0.27	1.85185			0.227623	0.2	0.08	1.5	0.3	0.63	0.15	0.32	0.37	0.26	0	0	0	0	0	0	0	0.13	0.29	0.3	0.37	0.36	0.64	0.94	0.8	0.94	0.74	0.43	0.28	0.78	0.69	0	1.06	0.9	0	0.75	0.33	0	0	0	0	0
109778	Blvra	2.2	2.69	3.61	1.34201			0.0190108	2.21	1.21	2.48	2.31	2.3	1.89	1.95	2.31	2.58	2.69	1.74	3.16	2.21	1.39	2.5	1.92	2.31	2.69	2.04	2.21	2.45	2.34	3.18	2.45	3.8	4.33	2.56	4.98	3.31	3.95	3.27	9.61	5.16	4.61	4.32	4.05	3.84	3.18	2.94	2.28	2.11
233016	Blvrb	60.35	35.27	46.23	1.30543			0.000193976	46.75	37.31	84.57	39.97	69.12	61.82	52.68	71.64	80.74	48.28	43.66	75.5	69.16	40.42	83.56	29.51	45.48	55.91	23.32	34.86	28.74	33.58	29.65	30.11	27.28	43.33	41.41	39.84	46.06	63.05	48.57	65.59	65.16	51.61	44.71	56.89	42.07	41.11	42.87	29.68	29.78
76809	Bri3bp	0.4	0.3	0.55	1.375			0.16643	0	0.62	0.82	0.31	0.58	0	0.43	0.8	0.77	0.1	0.46	0.67	0.14	0.27	0.1	0	0	0	0.29	0	0.27	0.28	0.68	0.43	0.32	0.25	1.12	0.52	0.48	0.27	0	0.24	0.81	0.48	0.31	1.21	0.41	0.96	0.54	0	0.37
12343	Capza2	3.28	5.76	7.34	1.7561			1.1e-05	1.96	2.67	4.28	2.71	2.47	2.82	3.77	3.65	3.27	3.42	2.75	4.95	2.89	2.8	4.8	2.98	2.63	7.64	3.33	7.74	5.99	3.71	8.47	5.02	7.35	9.37	4.92	5.18	9.28	7.68	7.36	12.64	8.96	9.97	10.71	8.38	5.08	7.53	6.29	5.22	6.63
226043	Cbwd1	0.47	0.51	0.29	1.62069			0.66285	0.09	0.05	0.07	0.07	1.67	1.52	0.07	0.05	0.1	0.02	1.45	1.84	0.02	0.07	0.02	0.08	0.01	1.99	0	0.05	2.03	0.02	0.11	0.16	0.05	0.11	1.53	0	0.07	1.51	0.11	0.06	0.12	0.06	0	0.25	0.04	0.03	0	0	0
12412	Cbx1	5.27	4.32	2.53	1.70751			0.0017556	6.96	2.52	10.72	3.24	7.87	8.35	3.43	6.56	4.99	3.1	2.98	5.4	6.15	2.21	4.61	3.76	3.23	6.24	1.61	3.16	4.92	4.9	4.21	3.41	4.87	6.61	4.91	3.73	1	4.62	1.86	2.82	4.06	3.73	5.47	3.43	1.14	4.81	3.12	1.81	1.19
12466	Cct6a	9.36	9.27	8.03	1.00971			0.376182	14.75	8.39	21.2	10.39	10.33	9.81	7.36	9.05	9.47	7.29	4.56	8.12	5.84	6.1	7.76	4.83	6.54	11.88	8.87	8.74	10.13	5.89	11.95	9.41	13.08	10.44	9.53	7.48	7.26	9.04	8	9.54	8.83	7.82	7.09	8.17	6.26	11.87	10.46	6.43	6.59
17079	Cd180	0	0.02	0.01	Inf			0.29338	0	0	0	0	0	0	0	0.01	0.01	0.01	0	0.01	0	0	0	0.01	0	0.01	0	0	0	0	0.02	0.01	0.02	0.03	0.08	0	0.03	0.08	0	0.05	0.08	0	0	0	0	0	0	0	0
66205	Cd302	0.04	0.44	0.86	11			5.01e-05	0	0	0	0	0	0	0	0.07	0.1	0.07	0.05	0.03	0.07	0.1	0.11	0.01	0	0.2	0.22	0.4	0.08	0.39	0.51	0.46	1.07	0.96	1.04	0.78	0.63	0.9	1.11	1.69	2.49	1.66	0.73	0.97	0.75	0.91	0.78	0.13	0.24
12571	Cdk6	0.26	0.25	0.34	1.30769			0.319235	0.26	0.32	0.41	0.28	0.3	0.33	0.22	0.17	0.29	0.27	0.15	0.21	0.22	0.27	0.14	0.05	0.11	0.45	0.36	0.06	0.48	0.06	0.14	0.17	0.41	0.28	0.42	0.64	0.46	0.12	0.4	0.55	0.47	0.77	0.74	0.34	0.12	0.28	0.13	0.16	0.12
107951	Cdk9	0.18	0.11	0.07	1.57143			0.00871114	0.11	0.13	0.32	0.22	0.3	0.26	0.26	0.1	0.26	0.08	0.15	0.11	0.08	0.17	0.13	0.19	0.08	0.21	0	0	0	0.05	0.14	0.05	0.44	0.09	0.06	0	0.12	0.15	0.1	0	0.2	0	0.13	0.12	0.11	0.06	0	0	0.05
76707	Clasp1	0.08	0.04	0.02	2			2.86e-05	0.07	0.07	0.09	0.12	0.14	0.14	0.07	0.04	0.04	0.05	0.07	0.08	0.12	0.1	0.06	0.04	0.06	0.08	0.02	0.11	0.01	0.05	0.01	0.05	0.02	0.04	0.02	0.01	0.04	0.01	0.04	0.15	0.05	0	0	0	0	0	0	0	0
66054	Cndp2	2.45	5.14	8.53	2.09796			2.42e-07	2.43	1.07	3.42	1.18	3.31	2.1	1.62	3.56	2.85	3.68	2.16	2.71	1.87	1.8	2.95	2.85	2.26	3.91	3.74	3.39	3.4	3.85	4.91	5.11	11.13	11.41	5.72	5.77	7.41	7.81	8.64	17.67	7.86	9.6	6.56	6.19	7.09	10.76	10.16	9.39	10.36
51786	Cpsf2	0.34	0.29	0.14	2.07143			0.141627	0.48	0.26	0.77	0.44	0.37	0.3	0.38	0.23	0.2	0.53	0.2	0.22	0.18	0.33	0.2	0.3	0.26	0.2	0.13	0.3	0.13	0.07	0.31	0.09	0.48	0.98	0.28	0.28	0.06	0.16	0.05	0.1	0.09	0.04	0.03	0.05	1.47	0.06	0.04	0.01	0.03
433375	Creg1	0.73	0.99	1.37	1.38384			0.018753	0.88	0.46	1.02	0.64	0.87	0.85	0.48	1.31	0.69	0	0.61	1.05	0.49	0.66	0.94	0.61	0.6	1.17	0.59	0.81	1.09	0.83	2.05	0.96	1.31	0.85	1	0.77	0.5	0.77	1.5	1.63	1.15	0	0.92	1.03	0.97	0.93	1.46	2.36	1.47
110750	Cse1l	3.13	2.11	1.37	1.54015			0.0452581	2.81	3.2	13.52	2.29	2.4	2.91	2.04	2.63	1.94	1.63	1.66	1.91	2.12	2.26	3.6	2.22	1.4	1.9	4.21	1.86	1.33	1.73	2.01	3.33	1.66	2	1.64	1.89	1.74	3.32	1.66	1.15	1.22	1.36	1.22	1.15	1.13	2.07	1.38	0.96	1.48
13010	Cst3	0.02	0.19	0.12	6			0.0621694	0	0	0	0.2	0	0.15	0	0	0	0	0	0	0	0	0	0	0.17	0.11	0.68	0.21	0	0.09	0.31	0	0.37	0.35	0	0.45	0.29	0	0.35	0.57	0	0.34	0.22	0	0	0	0	0	0
74245	Ctbs	0.01	0.11	0.16	11			0.0230967	0	0	0	0	0.12	0.04	0	0	0	0	0	0	0	0	0	0	0	0	0	0	0	0.14	0.19	0.25	0.15	0.47	0.13	0.21	0.09	0.09	0.41	0.28	0.2	0.46	0.52	0.16	0.3	0.09	0	0	0
12385	Ctnna1	0.87	2.14	3.29	2.45977			3.44e-07	0.4	0.5	1.63	0.83	0.6	0.59	0.8	1.21	1.14	0.54	0.88	1.14	0.6	0.73	1.46	0.77	1.24	2.71	1.57	1.66	1.61	2.21	2.99	2.08	2.75	3.07	3.02	3.14	3.31	4.3	3.4	4.59	4.77	4.24	5.83	5.4	2.63	3.64	3.16	1.67	1.83
13036	Ctsh	0.16	1.29	2.43	8.0625			1.38e-07	0	0	0	0	0	0	0.13	0.37	0.3	0	0.27	0.35	0.32	0.12	0.48	0.41	0.2	1.06	0.55	0.99	0.59	0.95	2.1	0.7	2.66	3.49	1.82	1.32	1.53	3.15	2.28	4.88	2.74	2.02	2.52	3.95	1.51	1.76	2.49	4.3	2.76
13043	Cttn	0.77	1.17	1.99	1.51948			1.38e-07	0.56	0.48	1.6	0.56	0.86	0.78	0.59	1.01	1.08	0.46	0.61	1.27	0.26	0.39	1.1	0.26	0.76	1.71	1.22	0.71	1.66	0.89	1.33	1.17	0.91	2.11	1.28	1.65	1.67	2.44	2.61	2.36	3.1	2.01	2.08	2.68	1.58	1.4	1.8	2.28	1.67
72584	Cul4b	0.34	0.17	0.36	2			0.174817	0.29	0.32	0.82	0.42	0.23	0.37	0.28	0.38	0.4	0.14	0.22	0.44	0.2	0.22	0.33	0.14	0.13	0.33	0.1	0.14	0.05	0.06	0.27	0.19	0.38	0.11	0.19	0.35	0.17	0.5	0.22	0.1	0.58	0.47	0.2	0.15	0.1	1.73	0.21	0.25	0.21
13110	Cyp2j6	0	0.13	0.26	Inf			0.0182003	0	0	0	0	0	0	0	0	0	0	0	0	0	0	0	0	0	0	0	0	0	0	0	0	0.63	0.7	0.23	0.36	0	0.18	0.38	0.46	0.19	0.23	0	0.61	0	0	0	0	0
208846	Daam1	0.03	0	0.04	Inf			0.00803223	0	0.01	0.03	0.02	0.09	0.03	0.03	0.14	0.02	0.03	0.01	0.01	0.08	0.01	0.01	0.01	0.01	0.01	0	0	0	0	0	0	0	0	0	0.06	0.02	0.02	0	0.08	0.05	0.03	0.04	0.08	0.06	0.06	0.07	0	0
13167	Dbi	38.35	262.31	508.58	6.8399			2.06e-08	19.97	19.81	34.75	9.81	13.02	29.76	8.11	62.31	40.39	32.17	39.02	42.2	87.36	82.5	54.08	44.03	97.97	211.69	193.72	301.99	196.54	176.74	366.98	288.6	402.2	460.38	406.82	426.94	214.23	368.67	559.5	397.51	300.81	326.32	318.68	179.62	432.61	577.45	778.98	870.29	421.43
22428	Dctn6	0.28	0.12	0.35	2.33333			0.459523	0.19	0.27	0.17	0.3	0.58	0.38	0.41	0.15	0.41	0	0.3	0.4	0.19	0.19	0.24	0	0.16	0.42	0.14	0	0.27	0	0.22	0.26	0	0	0	0.99	1.31	0.33	0	0	0	0	0.3	0.36	0	0	0	0	0
66422	Dctpp1	0.78	0.54	0.3	1.8			0.129897	0.79	0.51	3.54	0.2	0.5	0.44	0.48	0.32	0.38	0.33	0.62	0.32	0.12	0.4	2.68	0.31	0.26	0.66	0.59	0.3	0.27	0.5	0.67	0.41	1.05	1	0.48	0.71	0.24	0.45	0.3	1.02	0.21	0.19	0.67	0	0.1	0.42	0.23	0	0.05
104721	Ddx1	2.34	2.67	3.51	1.31461			0.00562837	2.68	2.06	4.78	2	2.45	3.35	2.45	2.56	2.04	1.62	1.71	1.9	2.19	1.45	1.87	1.81	1.77	2.82	1.73	2.4	2.13	1.92	3.24	2.83	5.07	3.06	3.27	3.18	4.03	3.53	3.55	4.26	5.57	3.57	5.02	3.83	2.88	5.02	3.48	2.61	1.69
234733	Ddx19b	0.55	0.57	0.32	1.71875			0.221743	1.05	0	1.83	0.76	1.08	1.05	0.67	0.86	0.94	0	0	0	0	0	0	0.7	0	1.11	0	0.69	0.65	0.49	0.56	0.66	0.62	0.82	0.56	0.82	0	0.62	0.38	0.51	0.78	0	0.5	0.39	0.38	0	0.53	0	0
216820	Dhrs7b	0.14	0.75	0.5	3.57143			0.157611	0.09	0.08	0.06	0.12	0.25	0.17	0.1	0.22	0.16	0.06	0.09	0.13	0.06	0.15	0.38	0.12	0.22	0.3	0.18	0.62	0.21	0.24	0.32	0.23	0.84	5.29	0.44	0.38	0.5	0.74	0.48	0.74	0.46	0.77	0.54	0.46	0.42	0.6	0.55	0.5	0.35
245474	Dkc1	0.79	0.64	0.67	1.1791			0.374605	0.53	1.01	1.31	1.36	0.63	1.17	1.09	0.61	0.71	0.3	0.59	0.82	0.26	0.69	0.75	0.36	0.44	0.87	0.3	0.46	0.78	0.4	0.62	0.49	1.37	0.79	0.74	0.96	0.7	0.6	0.71	0.95	0.93	0.37	0.97	0.56	0.58	0.48	0.5	0.73	0.39
66143	Eef1e1	1.43	1.73	1.33	1.20979			0.37238	1.76	1.41	1.61	1.97	1.55	1.68	1.14	1.36	1.59	1	0.95	1.48	1.45	1.37	1.11	0.79	1.38	1.35	1.26	2.45	1.65	0.61	3.15	1.21	2.68	3.14	1.11	0.77	1.19	0.78	0.95	4.2	1.34	1.17	1.52	1.68	1.08	0.56	0.58	0.7	2.54
98878	Ehd4	0.37	0.63	0.45	1.4			0.0258446	0.37	0.23	0.84	0.26	0.26	0.31	0.26	0.49	0.42	0.29	0.29	0.5	0.37	0.25	0.36	0.32	0.39	0.52	0.42	0.54	0.33	0.44	1.45	0.77	0.71	0.65	1.02	0.73	0.56	0.54	0.58	0.64	0.62	0.75	0.62	0.44	0.21	0.29	0.46	0.27	0.37
66235	Eif1ax	2.18	1.82	1.04	1.75			0.00224857	4.28	4.04	2.65	1.77	3.53	1.82	1.93	1.75	1.99	1.21	1.04	1.58	2.56	1.06	1.44	1.6	2.33	2.28	2.44	1.04	1.16	0.95	1.52	1.85	1.79	3.54	1.29	1.24	0.97	0	0.14	0.81	1.19	0.63	1.87	0	1.37	1.23	2	2.18	0.31
26905	Eif2s3x	2.59	2.21	2.64	1.01931			0.734291	3.05	3.26	4.19	2.87	3.56	2.27	2.09	2.21	2.39	1.71	1.67	2.85	2.62	2.44	1.71	1.71	1.94	2.82	1.88	2.93	0	2.1	0	1.49	5.16	3.73	2.78	4.14	4.6	0	5.09	4.93	2.93	3.4	4.77	3.45	0	3.75	3.1	2.43	1.68
13669	Eif3a	5.2	4.31	4.01	1.2065			0.0345042	5.59	5.83	7.9	5.67	5.91	5.54	4.53	4.99	4.54	4.2	4	5.6	5.12	5.25	3.38	3.95	3.37	4.79	3.65	3.9	4.11	3.11	4.3	3.23	7.85	5.77	3.69	5.14	4.67	5.14	4.94	5.37	4.13	3.42	3.34	5.18	3.74	5.08	3.68	3.58	5.58
98221	Eif3m	2.28	1.99	2.3	1.00877			0.610406	2.6	2.94	3.52	2.86	2.37	2.86	2.41	1.58	1.99	1.52	1.6	2.12	1.93	2.17	1.7	1.87	1.28	2.46	1.46	2.27	1.88	1.41	2.54	0.92	1.62	2.47	3.65	1.03	3.35	1.02	1.18	3.09	3.37	2.57	1.21	3.76	1.88	3.37	4.69	2.29	1.48
13805	Eng	0.1	0.2	0.15	1.33333			0.35323	0.14	0.11	0.04	0	0.39	0.02	0.02	0.02	0.04	0.2	0.29	0	0.22	0.03	0.04	0.08	0.5	0.2	0.5	0.27	0	0.36	0	0.07	0.07	0.32	0.09	0.28	0.03	0.03	0	0.35	0.1	0.18	0.49	0.06	0	0.08	0.23	0	0.68
13809	Enpep	0.04	0.33	0.59	8.25			0.00876495	0	0	0	0	0	0	0.09	0.09	0.03	0	0.33	0.05	0.01	0	0.07	0.02	0.01	0.07	0.06	0.16	0.05	0.12	0.27	0.14	0.34	0.98	1.78	0.44	0.22	0.32	0.15	0.32	0.3	0.29	0.2	0.53	0.3	0.68	0.42	0.47	0.82
12495	Entpd1	0	0.06	0.05	Inf			0.0557379	0	0	0	0	0	0	0	0	0	0	0	0	0.01	0.01	0	0.02	0	0.04	0.03	0.09	0	0	0.06	0.13	0.11	0.11	0.09	0.06	0.03	0	0.16	0.19	0.28	0	0	0	0	0.07	0.02	0	0
107508	Eprs	2.36	3.1	3.97	1.28065			0.00104598	2.38	2.07	4.29	2.19	2.35	2.62	2.22	2.41	2.5	1.81	1.71	2.52	2.04	1.85	2.45	2.01	2.34	3.22	2.43	2.72	2.23	2.6	3.76	2.19	5.92	4.44	3.3	3.26	4.51	3.69	4.35	5.79	2.98	7.25	5.95	4.46	3.32	3.89	3.97	4.04	2.45
69524	Esam	0	0.06	0.05	Inf			0.42108	0	0	0	0	0.02	0.02	0	0	0	0	0	0	0	0	0	0	0.03	0.38	0	0	0	0	0	0	0	0.16	0.14	0.66	0.02	0	0	0.19	0.05	0	0	0	0	0	0	0	0
52635	Esyt2	0.26	0.23	0.19	1.13043			0.593988	0.12	0.18	0.11	0.11	0.26	0.04	0.3	1.31	0.22	0.15	0.19	0.29	0.15	0.28	0.18	0.16	0.16	0.58	0.35	0.25	0.19	0.14	0.09	0.09	0.18	0.26	0.31	0.28	0.35	0.23	0.21	0.18	0.21	0.21	0.27	0.17	0.09	0.17	0.3	0.15	0.11
227715	Exosc2	0.48	0.31	0.2	1.55			0.00807862	1.29	0.59	0.65	0.5	0.33	0.42	0.79	0.32	0.38	0.19	0.4	0.36	0.63	0.19	0.21	0.22	0.09	0.18	0.1	0.55	0.13	0.09	0.52	0.34	0.82	0.56	0.17	0.07	0.44	0	0.42	0.35	0.46	0.29	0.32	0.19	0.17	0.17	0.25	0.1	0.03
66540	Fam107b	0.21	0.33	0.25	1.32			0.879602	0.24	0.28	0.31	0.15	0.13	0.22	0.11	0	0.12	0.34	0.07	0.55	0.15	0.13	0.41	0.19	0.39	0	0.71	0.41	0.33	0	0.38	0.3	0.33	0.56	0.4	0	0	0	0.2	3.84	0.28	0	0	0	0	0	0	0	0.11
215015	Fam20b	0.46	0.23	0.28	1.64286			0.637663	0	0	0	0.73	0.72	0.7	0.75	0.68	0.66	0.59	0.78	0	0.84	0	0.42	0	0	0	0	0	0	0	0	0	0	1.46	1.25	0	0	0	3.21	0	1.92	0	0	0	0	0	0	0	0
14137	Fdft1	0.43	0.75	0.35	1.74419			0.0912046	0.21	0.18	0.4	0.36	0.24	0.07	0.59	0.48	0.5	0.54	0.66	0.46	0.36	0.53	0.87	0.89	0.67	1.56	1.28	1.6	1	0.58	0.24	0.18	0.27	0.2	0.48	0.15	0.11	0.46	0	0	0	0	0	0	0.41	2.19	1.09	0.28	0.31
14199	Fhl1	0.15	0.69	0.85	4.6			0.00157234	0.2	0.1	0.12	0.06	0.12	0.08	0.07	0.22	0.16	0.15	0.13	0.29	0.17	0.22	0.2	0.32	0.26	0.59	0.4	0.46	0.33	0.62	1.31	0.8	1.34	0.97	0.88	0.88	0.89	1.34	2.55	0.46	1.21	0.45	1.09	1.19	0.66	0.35	0.53	0.36	2.43
338355	Fkbp15	0.26	0.22	0.2	1.18182			0.447455	0.31	0.26	0.46	0.21	0.23	0.22	0.22	0.28	0.1	0.43	0.27	0.3	0.23	0.22	0.09	0.17	0.25	0.2	0.15	0.35	0.27	0.3	0.14	0.21	0.09	0.42	0.15	0.41	0.36	0.39	0.08	0.25	0.31	0.37	0.21	0.09	0.37	0.06	0.05	0.16	0.06
14248	Flii	0.12	0.3	0.38	2.5			0.0597691	0.18	0.03	0.04	0.03	0.19	0.1	0.05	0.1	0.05	0.1	0.02	0.18	0.35	0.29	0.1	0.11	0.53	0.25	0.24	0.4	0.29	0.54	0.09	0.08	0.26	0.53	0.24	0.39	0.08	0.1	1.35	1.04	0.79	0.92	0.11	0.06	0.65	0.14	0.22	0.03	0.04
14251	Flot1	0.15	0.24	0.3	1.6			0.0414706	0.05	0.05	0.25	0.19	0.17	0.13	0.13	0.13	0.25	0.22	0.08	0.15	0.12	0.1	0.21	0.22	0.08	0.12	0.2	0.34	0.11	0.15	0.12	0.21	0.36	0.28	0.67	0.22	0.25	0.24	0.28	0.98	0.33	0.58	0.25	0.09	0.34	0.32	0.22	0.25	0.13
14319	Fth1	13.25	11.6	2.43	4.77366			8.15e-07	14.61	14.57	16.05	8.91	15.15	16.79	10.78	13.78	14.07	15.06	11.02	14.8	13.72	12.65	6.76	6.5	7.37	7.69	10.49	23.59	9.89	16.15	24.59	12.8	3.75	12.47	3.88	3.61	16.24	1.56	2.51	13.45	0.66	0	0	0	1.37	1.17	0.65	0.74	0.58
23880	Fyb	0.08	0.12	0.13	1.08333			0.699062	0.16	0.05	0.07	0.16	0.07	0.08	0.12	0.12	0.03	0.04	0.04	0.08	0.06	0.07	0.06	0.04	0.15	0.1	0.05	0.11	0.07	0.03	0.07	0.11	0.1	0.59	0.08	0.13	0.06	0.24	0.08	0.77	0.75	0	0.01	0.12	0	0.1	0.06	0	0
27041	G3bp1	9.36	5.58	4.88	1.67742			0.000108475	12.62	10.58	17.56	12.35	11.56	9.34	8.21	7.08	8.86	7.77	5.45	8.13	6.63	6.03	8.24	5.8	4.76	7.14	2.9	4.21	4.72	4.47	4.13	5.33	8.52	8.95	6.04	3.59	5.43	10.17	6.32	8.03	7.57	6.96	4.84	6.25	2.97	6.46	5.43	2.5	1.69
23881	G3bp2	1.03	0.9	1.22	1.18447			0.0835387	1	1.21	1.98	1.08	1.03	1.76	1.02	0.98	0.7	0.75	0.68	0.97	0.84	0.77	0.61	0.76	0.42	0.5	0.64	0.71	0.75	0.73	1.04	1.42	1.27	1.33	1.24	0.95	1.25	1.53	1.2	1.66	1.1	1.42	1.51	1.63	0.95	1.42	1.4	0.5	1.4
14635	Galk1	6.13	19.12	20.27	3.11909			0.00185455	4.58	4.06	10.28	5.26	4.72	4.31	5.01	6.88	6.07	5.68	4.83	8.21	6.44	6.06	9.54	8.22	10.94	22.62	19.58	14.07	15.34	15.45	23.96	18.29	23.22	31.3	26.4	29.03	23.88	25.57	44.57	45.13	32.73	43.98	34.32	21.04	14.08	14.39	14.62	5.58	4.66
69976	Galk2	0.03	0.1	0.17	3.33333			0.00026159	0.02	0	0.16	0	0.01	0.02	0	0.02	0.04	0.01	0.04	0.01	0.06	0	0.04	0.1	0	0.11	0.07	0.15	0.06	0.13	0.13	0.07	0.17	0.16	0.08	0.27	0.22	0.05	0.2	0.23	0.26	0.21	0.41	0	0.23	0.29	0	0.02	0.14
14450	Gart	3.1	1.69	1.2	1.83432			1.63e-05	2.74	2.23	7.88	4.04	3.71	4.1	2.76	2.5	2.62	2.26	2.17	3.05	2.03	2.09	2.26	2.09	1.49	2.4	1.39	1.56	1.78	1.01	1.45	1.71	2.21	1.99	1.25	1.43	1.05	1.63	1.15	1.23	1.37	0.66	0.84	1.51	0.9	2.22	2.4	0.96	0.64
75612	Gns	0.1	0.31	0.43	3.1			0.00179657	0.12	0.09	0.13	0.01	0.12	0.07	0.09	0.08	0.12	0.09	0.06	0.08	0.17	0.16	0.04	0.07	0.1	0.17	0.13	0.19	0.12	0.34	0.65	0.32	0.72	0.61	0.35	0.72	0.36	0.52	0.89	0.7	1.02	0.5	0.87	0.27	0	0.16	0.44	0.24	0.32
14853	Gspt2	0.84	0.53	1.01	1.58491			0.187367	1.14	0.84	2.73	1.2	1.53	1.26	0.77	0.88	0.86	0	0.32	1.03	0	0	0	0.43	0	1.34	0	0.59	0.57	0	0.49	0.8	0.81	0.64	0.71	0.62	1.32	1.51	0.98	0.62	0	0.87	1.37	0.63	0.68	2.62	1.57	1.04	0.51
110006	Gusb	0.2	0.5	0.74	2.5			0.00314867	0.23	0.19	0.26	0.21	0.23	0.09	0.17	0.23	0.23	0.16	0.21	0.14	0.32	0.2	0.12	0.24	0.21	0.25	0.31	0.11	0.24	0.52	0.89	0.28	1.46	0.93	0.59	0.99	0.54	0.29	2.34	0.95	0.88	1.4	1.02	0.4	0.98	0.27	0.25	0.95	0.36
27357	Gyg	0.41	0.46	0.54	1.17391			0.431018	0.41	0.21	0.8	0.23	0.47	0.32	0.42	0.49	0.39	0.36	0.36	0.74	0.5	0.19	0.29	0.28	0.46	1	0.35	0.33	0	0.32	0.56	0.35	0.29	0.44	1.11	0.36	1	0.39	1.04	0.55	1.15	0.64	0.61	0.35	0.02	0.4	0.69	0.53	0
110611	Hdlbp	3.49	11.63	14.46	3.33238			2.69e-09	2.34	2.09	4.64	2.8	2.78	3.7	2.32	5.05	4.4	3.52	2.41	4.86	2.73	2.52	6.14	5	4.73	14.81	8.59	9.09	8.49	7.82	14.57	12	18.9	20.54	14.99	14.14	16.94	18.91	16.27	19.63	15.89	17.95	17.81	19.17	13.38	16.85	12.57	10.53	11.09
52120	Hgsnat	0.09	0.84	0.53	5.88889			0.251673	0	0	0	0	0	0	0	1.21	0.08	0	0	0	0	0	0	0	0.3	1.31	0	0	0	0	0.2	2.48	0.36	0.2	5.21	0.31	0	0.51	0.61	0.24	4.74	0	0.15	0.46	0.1	0.33	0.18	0.07	0.07
215114	Hip1	0.05	0.1	0.12	2			0.278979	0.09	0.03	0.14	0.03	0.02	0.04	0.03	0.12	0.04	0.02	0.06	0.04	0.06	0.02	0.03	0.02	0.06	0.04	0.02	0.08	0.02	0.07	0.49	0.11	0.11	0.12	0.12	0.17	0.17	0.12	0.11	0.27	0.16	0.07	0.57	0.05	0.03	0.24	0.06	0	0
212032	Hk3	0.07	0.14	0.11	1.57143			0.396072	0	0	0	0.02	0.01	0.03	0.13	0.3	0.11	0.04	0.05	0.18	0.05	0.03	0.13	0.06	0.07	0.11	0.15	0.36	0.36	0.04	0.05	0.07	0.17	0.11	0.08	0.21	0.31	0.24	0.06	0.5	0.17	0.01	0.04	0.13	0	0.18	0.19	0	0
15382	Hnrnpa1	28.68	16.5	6.25	2.64			4.04e-08	41.37	24.05	59.08	27.9	42.26	44.68	22.1	27.72	27.76	16.36	15.33	27.06	23.33	15.39	15.77	14.37	14.72	24.45	8.95	12.75	16.53	13.22	16.33	14.14	22.17	24.18	16.17	8.41	8.88	11.15	11	11.67	9.94	6.33	9.55	7.45	3.11	5.07	4.25	2.25	3.97
51810	Hnrnpu	20.43	23.59	20.07	1.15467			0.494739	30.18	25.87	33.49	16.8	23.3	24.31	19.35	17.72	17.24	15.81	16.44	15.3	17.82	17.65	15.19	13.99	12.87	45.27	24.81	16.27	18.45	19.12	27.57	16.13	36.67	28.09	23.84	22.66	21.42	22.98	38.71	20.9	30.19	16.73	28.66	21.49	17	25.45	17.27	13.79	7.58
68693	Hnrnpul2	2.15	2.38	2.52	1.05882			0.618241	2.21	2.53	3.94	1.8	2.27	1.9	1.66	2.3	2.48	1.86	1.47	2.12	2.06	1.79	1.86	1.66	1.56	2.22	1.99	2.28	0.74	1.83	2.57	1.51	5.27	4.46	2.49	2.95	2.04	2.77	4.03	4.4	2.68	3.97	3.35	3.24	3.28	2.54	3.04	1.13	0.85
77963	Hook1	0	0.02	0.03	Inf			0.0329639	0	0	0	0	0	0	0.01	0.01	0	0	0	0	0	0	0	0	0	0	0	0	0	0	0.06	0.08	0	0.03	0.01	0.01	0	0.08	0.02	0.05	0	0	0.02	0.12	0.1	0.01	0	0	0
65972	Ifi30	0.67	0.91	0.83	1.09639			0.565077	0.18	0.37	0.7	0.6	0.28	0.37	0.4	1.8	1.09	0.82	0.7	1.02	0.36	0.66	0.67	0.93	0.96	0	0.55	1.25	0.08	0.58	0.72	0.69	2.24	0.83	2.07	0.76	1.67	1.81	0.57	1.44	0.61	2.03	0.74	1.02	0.26	1.07	0.64	0	0
16004	Igf2r	1.18	0.86	0.32	2.6875			1.28e-07	1.15	0.94	1.55	1.36	1.23	1.14	1.08	1.21	1.29	1.02	0.84	1.5	1.06	0.94	1.42	1.8	1.19	1.6	0.69	0.68	0.74	0.37	0.87	0.38	0.39	1.14	0.41	0.55	0.67	0.72	0.44	0.86	0.35	0.37	0.79	0.32	0.14	0.08	0.08	0	0
67781	Ilf2	1.75	1.5	1.25	1.16667			0.0803427	2.22	1.83	2.67	2.07	2.3	2.41	1.27	1.19	2.09	1.34	1.06	1.76	1.8	1.09	1.2	1.3	1.52	1.36	0.77	1.25	1.17	1.45	1.77	1.11	2.37	2.33	1.65	1.11	1.41	1.44	1.94	2.39	2.38	1.84	1.67	1.81	0.98	1.18	0.96	0.84	0.33
16201	Ilf3	0.91	0.87	0.8	1.04598			0.664555	1.01	1.08	1.28	1.13	1.01	1.21	0.83	0.86	0.88	0.64	0.58	0.63	0.74	0.94	0.8	0.9	0.84	0.75	0.57	0.77	0.55	0.96	1.06	0.61	1.33	1.21	0.87	0.91	1.43	0.76	1.26	1.09	1.39	0.88	1.52	1.31	0.48	0.64	0.41	0.49	0.18
16330	Inpp5b	0.1	0.04	0.06	1.66667			0.0356765	0.08	0.03	0.12	0.09	0.28	0.09	0.09	0.07	0.11	0.09	0.05	0.13	0.13	0.07	0.05	0.06	0.06	0.03	0.08	0.02	0.03	0.02	0.02	0.03	0.02	0.06	0.09	0.12	0.01	0.04	0.22	0.01	0.07	0.15	0.01	0.03	0.14	0.02	0.04	0.04	0.02
210925	Ints9	0.07	0.05	0.01	5			3.94e-06	0.08	0.06	0.09	0.12	0.13	0.15	0.04	0.04	0.1	0.04	0.08	0.07	0.05	0.02	0.02	0.04	0.05	0.05	0.02	0.04	0.03	0.03	0.05	0.03	0.12	0.05	0.06	0	0	0	0.04	0	0.07	0.03	0	0.02	0	0	0	0	0
54131	Irf3	0.29	0.27	0.36	1.24138			0.349048	0.43	0.29	0.38	0.33	0.27	0.32	0.22	0.42	0.47	0.17	0.16	0.26	0.22	0.19	0.15	0.22	0.18	0.44	0.26	0.22	0.28	0.11	0.43	0.09	0	0.25	0.76	0.22	0.67	0.3	0.38	0.26	0.18	0.17	0.15	0.26	0.45	0.81	0.48	0.32	0.34
16399	Itga2b	0.75	1.5	1.14	1.52			0.430657	0.33	0.66	1.12	0.75	0.72	0.78	0.8	1.22	1.22	0.62	0.29	0.98	0.85	0.2	0.76	0.94	0.99	2.26	0.68	1.94	0.17	1.58	2.79	2.63	3.06	0.43	0.51	0.05	3.13	0.14	0.16	5.44	4.08	5.78	0.02	0	0	0	0	0	0
16564	Kif21a	0.01	0.1	0.12	10			0.00021895	0.02	0.02	0	0.01	0.01	0	0.01	0.02	0.02	0.03	0.01	0.02	0	0.01	0.01	0.01	0.02	0.05	0.03	0.03	0.03	0.03	0.19	0.08	0.22	0.16	0.3	0.13	0.07	0.12	0.11	0.12	0.2	0.04	0.06	0.11	0.1	0.18	0.15	0.13	0.02
16211	Kpnb1	5.53	4.24	3.21	1.30425			0.000162236	5.06	5.31	10.75	7.3	6.49	6.38	5.99	5.39	5.74	3.7	3.94	4.62	4.6	3.55	4.2	3.54	4.12	4.5	4.26	4.54	4.07	3.98	4.18	3.37	4.74	5.24	4.29	3.56	3.85	4.64	2.91	6.51	3.42	3.13	2.74	4.18	2.94	3.68	3.86	2.68	2.3
16783	Lamp1	0.96	2	3.67	2.08333			2.01e-05	0.34	0.99	0.37	1.55	0.75	2.24	1.35	1.19	1.03	0.88	0.89	1.06	0	0.79	0.9	1.13	1.2	2.13	0.81	1.36	1.07	1.03	3.19	1.45	4.01	4.55	2.06	0	4.15	3.53	2.84	4.19	5.21	4.91	5.56	5.5	3.62	6.72	5.54	1.03	1.95
98386	Lbr	2.71	1.98	0.82	2.41463			7.83e-07	2.09	3.71	2.14	4.15	4.45	1.37	4.47	2.13	1.55	1.72	3.4	1.64	2.2	3.59	2.08	2.02	2.72	2.28	1.24	2	1.45	2.63	2	0.99	2.57	1.97	1.83	1.73	1.17	1.43	0.89	2.07	1.65	0.57	0.28	0.91	0.46	0.42	1.12	0.72	0.32
18826	Lcp1	2.92	7.17	7.72	2.45548			0.000111586	1.85	1.41	2.34	1.71	2.13	1.81	2.17	4.53	3.83	2.8	2.57	4.17	3.29	2.31	6.92	4.08	4.63	6.91	7.28	9.1	6.4	5.08	7.17	6.39	10.45	9.9	8.62	11.63	8.08	14.23	10.32	18.79	9.34	5.77	5.61	4.68	5.57	5.11	5.06	7.94	4.68
16859	Lgals9	1.7	13.37	26.11	7.86471			3.15e-09	0.37	0.45	0.39	0.71	0.73	0.38	0.95	4.39	3.71	2.32	2.46	2.09	1.9	0.71	3.93	3.89	5.73	12.54	18.22	14.9	14.34	13.46	16.68	8.04	18.77	19.63	14.25	23.6	15.79	19.72	42.72	8.7	17.21	35.96	23.95	50.15	24.87	33.79	49.87	18.85	17.99
67678	Lsm3	3.03	0	2.89	Inf			0.342678	6.43	2.03	7.82	2.42	2.26	2.31	0	1.87	2.14	0	1.26	6.67	2.05	1.68	6.48	0	0	0	0	0	0	0	0	0	0	0	0	0	1.43	17.53	0	32.42	0.58	0	0	0	0	0	0	0	0
66978	Luc7l	1.28	0.77	0.51	1.5098			0.000533784	1.38	1.82	1.88	2.89	2.27	1.33	1.29	0.79	0.94	0.79	0.66	0.9	0.87	0.72	0.61	0.54	0.53	1.12	0.9	0.45	1.97	0.75	0.73	0.57	0.32	1.05	0.33	0.8	0.29	0.72	0.58	0.44	0.72	0.94	0	0.62	0.26	0.58	0.8	0.44	0.13
17096	Lyn	0.18	0.26	0.22	1.18182			0.380205	0.18	0.17	0.21	0.14	0.06	0.14	0.21	0.2	0.27	0.15	0.22	0.12	0.29	0.17	0.12	0.29	0.24	0	0.48	0.31	0.11	0.16	0.61	0.07	0.23	0.34	0.3	0.62	0.14	0.24	0.29	0.48	0.18	0.24	0.17	0.09	0.57	0.15	0.11	0	0.26
99470	Magi3	0	0.02	0.04	Inf			0.133489	0	0	0	0	0	0	0	0	0	0	0	0	0	0	0	0	0	0	0	0	0	0.02	0.03	0.04	0	0.17	0.02	0.15	0.09	0	0.03	0.2	0	0.1	0.08	0	0	0	0	0	0
26413	Mapk1	4.07	3.98	3.14	1.02261			0.451799	2.61	3.37	9.28	3.5	5.04	3.51	2.88	4.07	5.62	2.27	3.56	4.28	4.02	3.09	3.94	3.48	3.3	6.52	3.96	3.11	4.42	2.1	5.14	3.64	4.05	5.47	2.54	2.04	4.85	6.22	2.41	12.88	5.73	2.34	2.68	2	1.24	1.98	3.32	0.76	0.72
17118	Marcks	2.46	3.36	2.41	1.36585			0.318905	1.72	4.71	4.82	0.95	2.11	2.51	1.55	3.07	3.68	3.12	1.3	2.07	2.83	0.78	1.75	2.99	3.09	3.4	3.56	1.44	4.41	3.4	4.04	2.58	6.7	2.08	2.61	2.81	5.66	5.64	2.14	3.26	6.97	3.3	3.21	4.16	1.66	1.25	1.2	1.4	0.39
17357	Marcksl1	0.41	0.25	0	Inf			0.0627243	0	0	0	0	1.55	1.23	0	0.64	0.62	0	0	0	0	1.26	0.83	0	0	0	0	1.68	1.36	0	0	0	0	0	0	0	0	0	0	0	0	0	0	0	0	0	0	0	0
68294	Mfsd10	0.04	0.01	0.02	2			0.113885	0	0	0	0.12	0.09	0.06	0.09	0.05	0.02	0	0	0	0.06	0	0.06	0	0	0	0	0.07	0.03	0	0	0	0	0	0	0	0	0	0.09	0	0.11	0.05	0.02	0	0	0	0	0	0
70945	Mmrn1	0.02	0.02	0	Inf			0.00411481	0.02	0.02	0.07	0.02	0.06	0.03	0.02	0.02	0.05	0.02	0	0.03	0	0	0	0	0.02	0.05	0.01	0.04	0.01	0	0	0	0	0.01	0.09	0	0	0	0	0	0	0	0	0	0	0	0	0	0
67973	Mphosph10	0.28	0.41	0	Inf			0.0282377	0.23	0.63	0.66	0.42	0.22	0.18	0.24	0.18	0.17	0.08	0.07	0.1	0.06	0.1	0.85	0.04	0.04	0.05	1.49	1.49	0	0	1.68	0.13	0	0	0	0	0	0	0	0	0	0	0	0	0	0	0	0	0
17523	Mpo	0.96	1.39	0.17	5.64706			2.06e-08	0.55	0.55	0.55	0.64	0.4	0.42	1.8	1.16	1.28	0.71	1.4	1.33	0.81	1.21	1.61	1.21	1.02	2.14	2.41	1.78	1.09	0.78	1.63	1.45	1.36	0.96	0.89	0.46	1.03	0.53	0.6	0.26	0.23	0.01	0	0.02	0	0	0	0	0
17524	Mpp1	1.43	1.5	0.85	1.68235			0.00244958	1	0.95	0.72	1.37	1.34	1.41	1.57	2.06	1.58	1.96	1.22	1.92	1.6	1.49	1.31	1.68	2.47	1.3	0.98	1.42	1.02	1.3	1.6	0.97	1.77	2.34	1.1	1.16	1.38	1.21	1.95	2.15	0.79	0.99	1.15	0.84	0.68	0.8	0.47	0.23	0.26
17772	Mtm1	0.01	0.05	0.07	5			0.0615623	0	0	0	0	0	0	0	0	0	0.01	0	0.02	0.02	0.01	0.04	0	0	0	0.03	0.07	0.06	0.01	0.06	0.02	0.04	0.08	0.23	0.05	0.07	0.08	0.12	0.1	0.36	0.11	0.09	0	0	0	0	0	0
268783	Mtmr12	0.01	0.02	0	Inf			0.181937	0.01	0	0.03	0.01	0.01	0.01	0	0.02	0.01	0	0.04	0.03	0.01	0.01	0	0	0	0	0.01	0	0.01	0	0	0	0	0.15	0.02	0	0	0	0	0	0	0	0	0	0	0	0	0	0
238505	Mtr	0.13	0.09	0.06	1.44444			0.312758	0.15	0.03	0.14	0.07	0.13	0.09	0.05	0.16	0.15	0.05	0.04	0.1	0.06	0.3	0.37	0.03	0.05	0.37	0.22	0.03	0.01	0.01	0.04	0.15	0.06	0.06	0.05	0.02	0.13	0.11	0.01	0.05	0.07	0.02	0.07	0	0	0	0	0	0
17777	Mttp	2.66	12.5	24.65	4.69925			1.14e-12	1.1	0.67	2.34	2.7	1.72	2.67	2.54	3.36	3.59	2.49	2.82	3.85	2.74	2.33	4.95	4.92	4.16	12.03	8.13	9.8	7.76	6.81	8.63	10.13	26.45	28.72	22.49	22.11	24.18	25.7	22.26	34.15	27.61	32.29	24.21	30.84	21.21	24.33	25.12	27.38	24.52
18432	Mybbp1a	2.77	2.23	1.06	2.10377			0.000802158	4.96	5.86	4.09	4.04	2.5	2.61	3.15	1.36	1.41	1.49	2.4	1.58	2.5	2.08	1.45	1.46	1.37	1.93	4.6	2.15	1.28	1.57	2.81	1.12	3.57	2.59	2.31	3.59	1.72	0.72	1.25	2.1	1.35	0.6	2.32	0.95	0.54	0.86	0.78	0.92	0.27
17970	Ncf2	0.02	0.16	0.08	4			0.106155	0	0	0	0.02	0.01	0	0	0.08	0.07	0.02	0.03	0.14	0	0	0	0	0.01	0.2	0.19	0.36	0.59	0	0	0	0.1	0.07	0.44	0	0.24	0.56	0.02	0.12	0.47	0	0	0	0	0	0	0	0
67824	Nmral1	1.42	1.32	1.3	1.07576			0.864736	0.74	1.01	2.6	1.28	1.93	1.6	1.3	1.43	2.11	0.8	1.19	1.45	1.78	0.97	1.16	1.35	1.35	2.1	0.5	1.19	0.79	1.06	1.57	0.89	1.66	1.73	1.64	1.98	1.3	2.42	3.44	1.49	1.8	1.46	1.36	1.48	1.22	1.59	1.29	0.45	0.37
67134	Nop56	1.28	1.58	1.36	1.16176			0.485427	1.57	2.83	2.01	2.46	0.72	0.83	1.65	0.7	0.55	0.73	1.18	0.73	0.95	1.52	0.8	1.07	0.82	0.96	1.43	1.67	0.77	1.23	2.56	1	2.31	1.85	3.35	1.46	1.26	0.85	1.71	1.87	2.03	1.56	1.42	0.84	1.28	1.74	1.84	1.06	0.72
67429	Nudcd1	0.62	0.61	0.49	1.01639			0.823534	0.62	0.39	0.38	0.4	0.69	0.49	0.61	0.22	0.22	0.79	0.44	2.99	0.48	0.41	0.15	0.35	0.39	0.63	0.39	0.32	0.25	0.45	0.88	0.32	0.5	2.37	0.52	0.35	2.52	0.18	0.45	0.14	0.38	0.52	0.72	0.08	0.11	0.14	0.25	0.07	1.99
52653	Nudcd2	1.65	1.92	1.04	1.58654			0.00425602	1.72	1.33	2.99	1.83	1.44	2.43	1.41	1.32	1.27	1.1	1.59	1.84	1.44	1.59	1.42	1.41	1.39	0.72	2.27	1.89	2.14	1.33	3.05	1.07	3.9	1.61	2.3	1.92	0.53	1.62	1.45	1.38	0.57	2.4	0.87	0.99	1.56	0.78	0.92	1.2	0.92
53893	Nudt5	2.68	1.73	1.67	1.54913			0.243103	3.04	2.46	8.28	2.32	2.57	3.04	2.22	2.54	2.78	1.96	0.86	2.99	2.12	1.17	1.78	1.78	1.38	2.23	1.63	1.56	0.98	1.23	2.23	0.9	1.66	3.5	1.65	1.84	7.94	0.59	0.43	2.06	3.06	6.09	1.41	1.16	0.47	1.04	1.04	0.34	0.27
59015	Nup160	0.65	0.59	0.18	3.27778			0.0617352	0.68	0.2	2.62	0.43	0.3	1.41	0.39	0.2	0.24	0.58	0.16	1.74	0.22	0.45	0.11	0.16	0.59	1.67	0.84	0.14	0.1	1.01	0.91	0.07	0.2	1.2	0.14	1.09	0.06	0.1	1.14	0.17	0.08	0.1	0.03	0.14	0.03	0.01	0.04	0	0
67059	Ola1	1.98	1.54	2.35	1.18687			0.0167073	1.78	2.21	4.81	2.49	2.44	2.11	2.08	1.6	1.38	1	1.27	2.3	1.44	1.59	1.17	1.05	0.8	1.99	1.15	1.51	1.36	1.14	1.48	1.21	2.44	2.71	1.6	1.9	1.97	2.6	2.26	2.21	2.54	2.1	2.31	1.54	1.85	2.71	3.06	2.53	2.73
106326	Osbpl11	0.03	0.07	0.06	2			0.122905	0.04	0.02	0.03	0.02	0.04	0.02	0.02	0.01	0.03	0.03	0.01	0.09	0.04	0.03	0.06	0.06	0.04	0.06	0.08	0.05	0	0.05	0.1	0.07	0.14	0.05	0.15	0.15	0.09	0.13	0.15	0.06	0.18	0.05	0.11	0.06	0	0	0	0	0
229603	Otud7b	0.01	0.01	0	Inf			0.264359	0.01	0.02	0.01	0.01	0.03	0.02	0	0.02	0.04	0	0	0	0	0	0	0	0	0	0	0	0	0	0.06	0.01	0	0	0	0	0	0	0	0	0	0	0	0	0	0	0	0	0
67041	Oxct1	0.25	0.23	0.1	2.3			0.00322974	0.29	0.28	0.44	0.12	0.27	0.19	0.29	0.33	0.17	0.1	0.09	0.44	0.14	0.16	0.37	0.24	0.14	0.4	0.19	0.31	0.34	0.1	0.24	0.26	0.26	0.11	0.17	0.09	0.22	0.23	0.08	0.34	0.25	0.38	0.17	0	0	0	0	0	0
67054	Paics	5.73	4.69	6.72	1.17277			0.136301	5.36	7.05	12.41	3.81	5.4	9.15	4.72	4.53	6.17	3.97	4.72	4.89	4.79	4.63	4.33	3.38	3.23	7.17	4.13	4.17	2.58	3.26	5.93	3.31	7	5.97	6.12	6.96	8.46	7.94	4.83	8.19	8.99	14.45	11.92	5.77	5.1	7.44	6.12	4.64	3.2
224105	Pak2	0.88	0.98	0.69	1.11364			0.201618	0.71	0.73	2.21	0.52	1.11	1.19	0.71	1.3	0.97	0.43	0.4	0.69	0.99	0.56	0.61	0.88	0.57	1.02	1.05	1.1	0.63	0.82	0.81	1.06	1.21	0.85	1.7	0.62	0.67	1.29	1.45	0.77	1.15	1	0.71	0.58	0.29	0.73	0.72	0.08	0.16
27355	Pald1	0.09	0.13	0.05	1.8			0.0534448	0.01	0.01	0.31	0.05	0.27	0.06	0.09	0.14	0.12	0.12	0.02	0.06	0.05	0.02	0.05	0.18	0.15	0.04	0.04	0.03	0	0.08	0.16	0.24	0.32	0.17	0.12	0.14	0.14	0.04	0.05	0.15	0.15	0.06	0	0.05	0.01	0.02	0.04	0	0
75735	Pank1	0	0.01	0.02	Inf			0.123202	0	0	0	0	0	0	0	0	0	0	0	0	0	0	0	0	0	0	0	0	0	0	0.03	0.05	0	0	0	0	0	0	0.09	0	0.1	0	0	0	0	0	0	0	0
11545	Parp1	1.52	1	0.46	2.17391			7.16e-09	1.84	2.62	2.14	1.54	1.92	1.6	1.23	1.41	1.22	0.84	1.09	1.47	1.08	1.41	1.42	0.91	0.69	1.73	0.78	0.93	1.25	0.65	1.22	0.67	1.31	0.92	0.97	0.61	1.01	0.6	0.54	0.55	0.55	0.93	0.84	0.51	0.38	0.31	0.27	0.16	0.15
74551	Pck2	1.05	1.51	0.57	1.84211			9.06e-05	0.81	0.83	1.16	0.96	0.73	0.99	1.08	1.62	1.69	0.98	0.89	1.04	1.07	0.81	1.09	1.25	3.04	1.26	1	1.66	1.58	1.06	2.05	0.86	1.25	2.04	1.08	1.14	1.14	1.53	1.54	0.78	1.15	0.52	0.46	0.56	0.23	0.32	0.37	0	0.07
13026	Pcyt1a	0.68	1.25	1.13	1.66176			0.247081	0.33	0.57	0.75	0.61	0.35	0.55	0.58	0.62	0.78	0.47	0.61	1.11	0.8	0.68	1.37	0.62	0.8	0.99	1.14	1.57	0.65	1.3	2	0.4	0.96	3.45	1.08	1.17	1.66	0.57	2.03	3.42	0.75	4.73	0.97	0.68	0.54	0.87	0.59	0.38	0.57
18633	Pex16	0.01	0.16	0.21	16			0.000600135	0	0	0	0	0	0	0	0.06	0.02	0	0	0	0	0	0	0	0	0	0	0	0	0.07	0.23	0.13	0.41	0.59	0.43	0.34	0.33	0.08	0	0.15	0.31	0.13	0.27	0.11	0.08	0.21	0.14	0.37	0.17
56744	Pf4	14.18	23.58	4.31	3.29002			1.57e-05	13.81	15.18	28.52	10.19	18.35	18.16	9.44	10.97	15.67	16.84	5.74	22.14	7.29	4.54	15.81	13.66	7.22	22.02	14.98	17.42	24.26	19.88	18.1	36.44	41.91	20.46	46.58	4.5	10.84	13.4	4.18	7.27	33.53	0	0	0	0	0	0	0	0
18648	Pgam1	27.31	77.29	54.15	1.98279			1.53e-06	23.65	11.33	59.26	15.91	31.88	29.06	9.95	44.71	37.97	16.81	15.88	37.51	14.93	10.63	50.24	34.31	33.79	90.41	71.88	72.98	49.8	67.55	89.03	89.61	138.96	97.03	92.13	44.76	50.49	40.49	40.4	62.87	59.56	55.69	30.01	55.39	58.75	86.46	66.94	47.3	48.01
67078	Pgp	1.34	1.04	0.81	1.28846			0.00371882	1.85	1.67	1.63	1.61	1.22	1.94	1.32	1.23	1.68	0.78	1.22	1.15	0.6	1.38	0.81	0.54	0.45	1.79	0.96	1.57	0.97	1.12	1.15	0.59	1.49	0.87	0.98	1.67	1.1	0.63	0.88	1.01	0.44	0.75	0.75	0.53	0.49	0.77	1.41	0.99	0.87
83490	Pik3ap1	0.02	0.76	0.89	38			0.000421964	0	0	0	0	0	0	0	0	0	0	0.01	0.36	0	0	0	0.02	0.03	1.57	0.94	0.94	0.6	0.11	1.28	1.22	0.31	0.8	1.25	0.3	0.92	1.38	0.28	1.42	1.98	1.8	2.48	0.09	0.14	0.15	0.2	0.39	0.07
18718	Pip4k2a	0.15	0.14	0.06	2.33333			0.265813	0.06	0.12	0.65	0.08	0.38	0.2	0.12	0.12	0.15	0	0.05	0.27	0	0	0	0	0	0	0	0.15	0.09	0.12	0.14	0.06	0	0.69	0.4	0	0.1	0.14	0	0.39	0.11	0	0	0	0	0	0	0	0
18738	Pitpna	1.48	1.44	1.81	1.22297			0.82775	0.58	11.5	1.26	3.05	0.3	0.58	0.44	0.91	0.59	0.89	0.34	0.34	0.37	0.39	0.67	2.18	0.43	0.61	0.87	1.55	0.6	1.04	2.26	2.01	1.56	1.85	2.33	1.62	2.02	2.41	2.78	2.9	3.18	2.9	1.61	2.76	1.29	1.63	1.39	1.62	0.41
71772	Plbd2	0.06	0.15	0.21	2.5			0.000783643	0.08	0.03	0.08	0.02	0.07	0.08	0.06	0.14	0.05	0.01	0.09	0.05	0.02	0	0.13	0.08	0.07	0.09	0.06	0.14	0.03	0.12	0.2	0.09	0.3	0.37	0.29	0.19	0.15	0.33	0.39	0.27	0.21	0.26	0.33	0.13	0.22	0.08	0	0.11	0.11
56193	Plek	0.96	0.89	0.17	5.23529			0.000105183	1.96	0.62	2.47	1.19	1.57	1.24	0.71	0.43	0.56	0.37	0.67	0.61	0.45	0.76	0.8	0.31	0	0.99	0.74	0.42	0.85	0.6	1.44	1.26	1.19	1.95	0.93	0.4	0	0.81	0	0.85	0.47	0.19	0	0.24	0	0	0	0	0
84094	Plvap	0.43	0.24	0.38	1.58333			0.380238	0.82	1	0.94	0.17	0.93	0.92	0	0.65	0.68	0	0.13	0.23	0	0	0	0	0.14	0.21	0.56	0.25	0	0.26	0.04	0.26	0.06	0.32	0.79	0.37	0.2	0.34	1.32	0.06	0.56	0.3	0.51	0.3	0.75	0.39	0.54	0.53	0.27
235611	Plxnb1	0.1	0.2	0.16	1.6			0.696623	0	0	0	0	0	0	0.25	0.01	0.46	0	0.28	0.5	0	0	0	0.24	0.23	0.69	0	0	0	0	0	0	0.25	1.03	0.01	0	0	0	0.12	1.11	0.03	0.29	1.15	0.02	0.14	0	0.01	0	0
68603	Pmvk	0.6	0.54	0.42	1.11111			0.537137	0.51	0.38	0.34	0.91	1.07	0.51	0.62	0.92	0.28	0.44	0.59	0.56	0.57	0.32	0.96	0.49	0.8	0.66	1.8	0.9	0.73	0.17	0.3	0.12	0.28	0	0.18	0	0.09	0.73	0	0	0	0	0	0	0.73	1.08	1.73	0.74	0.29
67811	Poldip2	0.42	0.99	1.36	2.35714			2.05e-05	0.43	0.4	0.95	0.51	0.67	0.37	0.5	0.2	0.61	0.2	0.22	0.27	0.37	0.25	0.32	0.35	0.26	0.57	0.45	0.78	0.45	0.41	1.24	1	2.6	2.12	1.69	1.55	1.26	1.7	1.88	1.69	1.67	1.28	1.78	1.74	1.5	1.03	0.99	1	0.88
67710	Polr2g	0.78	0.45	0.11	4.09091			0.0356956	0.59	0.4	0.28	0.32	2.02	0.72	0.4	0.14	0.88	0.31	0.26	2.52	0.49	0.18	2.15	0.17	0.19	3.2	0.17	0.13	0	0.21	0.1	0.23	0.25	0.61	0.11	0	0.96	0.13	0	0.37	0.22	0	0	0	0.09	0	0.12	0	0
57349	Ppbp	1.85	3.98	2.12	1.87736			0.078273	1.65	3.04	0	1.86	0.83	2.41	2.24	0.73	1.18	1.94	1.28	5.71	0	1.76	3.15	2.97	3.94	3.6	0	2.12	2.88	5.94	3.17	8.73	4.1	7.06	3.22	0	7.54	3.59	4.28	6.47	8.72	2.85	1.23	0.38	0	0	0	0	0
68816	Ppil1	2.67	2.37	1.3	1.82308			0.218518	0.87	2.59	9.41	1.04	3.82	2.75	0.92	6.94	2.41	2.49	1.37	1.58	1.87	1.11	0.85	2.63	1.81	3.49	0	0.82	2.72	5.06	0.43	1.09	2.13	3.16	5.15	0.85	4.48	8.33	0.35	1.13	0	0	0	0	0.37	3.48	2.52	1.35	0.52
19047	Ppp1cc	3.07	2.75	3.35	1.09121			0.539313	5.35	4.39	5.55	3.33	2.63	4.03	2.91	2.31	2.67	2.99	2	2.52	2.83	2.59	0	2.23	1.86	2.16	1.44	2.43	2.38	1.84	2.45	2.66	5.38	5.61	2.58	3.85	4.25	3.66	3.87	3.81	2.97	5.15	4.07	3.93	3.85	4.66	4.33	3.62	0
232807	Ppp1r12c	0.02	0.04	0.02	2			0.33666	0.01	0	0.11	0.02	0.01	0.02	0	0	0	0.02	0.01	0.01	0.01	0	0.01	0.01	0.01	0.24	0	0	0	0.01	0.1	0.02	0.03	0.03	0.03	0.04	0	0.07	0.01	0.04	0	0.11	0.02	0.01	0	0	0	0	0
72461	Prcp	0.63	1.1	1.23	1.74603			0.118952	0.56	0.84	0.97	0.56	0.45	0.69	0.8	0.85	0.43	0.87	0.52	0.46	0.68	0.55	0.28	0.54	0.78	0.85	1.57	1	0.63	0.91	0.98	1.23	2.11	1.64	0.97	3.31	1.59	1.33	2.7	2.89	3.1	1.96	1.49	0.57	0.86	0.72	0.41	0.23	0.29
50907	Preb	0.23	0.86	1.19	3.73913			5e-06	0.14	0.09	0.12	0.16	0.11	0.11	0.25	0.5	0.16	0.14	0.22	0.34	0.29	0.28	0.51	0.3	0.3	0.92	1.35	0.54	0.42	0.58	0.78	0.78	0.93	2.19	1.23	1.66	1.03	1.69	1.83	2.44	1.84	0.61	1.1	1.34	0.75	1.06	0.56	1.24	0.47
26442	Psma5	8.8	10.36	17.71	1.70946			6.56e-07	13.46	9.79	13.73	8.92	10.39	9.02	7.14	8.61	7.16	7.04	6.71	6.67	8.11	6.36	8.87	6.31	6	10.08	6.48	6.83	6.49	8.6	12.2	10.9	19.22	22.09	9.14	12.68	13.77	18.67	16.2	19.67	14.51	19.25	17.63	16.14	14.06	23.58	23.74	11.86	15.92
78697	Pus7	0.32	0.18	0.02	9			2.11e-05	0.38	0.4	0.59	0.27	0.6	0.39	0.73	0.13	0.12	0.23	0.15	0.25	0.28	0.15	0.09	0.13	0.12	0.24	0.08	0.12	0.03	0.03	0.14	0.54	0.6	0.11	0.06	0.13	0.04	0	0.02	0.04	0.02	0.03	0	0.01	0	0	0	0	0
76108	Rap2a	0.06	0.12	0.1	1.66667			0.156067	0.08	0.06	0	0.03	0.06	0.06	0.07	0.12	0.11	0.05	0.05	0.04	0.06	0.08	0	0.14	0.1	0.05	0.12	0.07	0.06	0.14	0.12	0	0.36	0.22	0.07	0.16	0.09	0.14	0.02	0	0.22	0.13	0.04	0	0	0	0	0.14	0
56508	Rapgef4	0	0.03	0.03	Inf			0.0165512	0	0	0	0	0	0	0	0	0	0	0	0	0	0	0	0	0	0	0	0	0	0.01	0.12	0.04	0.06	0.08	0.08	0.07	0.08	0.03	0.02	0.01	0.01	0	0	0	0	0.01	0.05	0.07	0.05
104458	Rars	3.22	3.06	3.36	1.04348			0.665281	3.22	3.52	4.72	3.87	3.35	3.34	3.19	3.32	4.31	2.18	2	3.23	2.18	2.23	3.61	1.8	2.53	3.33	2.84	2.78	3.52	2.15	4.74	2.77	2.69	4.32	3.24	2.93	3.64	4.29	3.13	4.2	4.83	4.28	4.31	3.93	3.42	2.67	3.67	3.63	1.16
19414	Rasa3	0.05	0.04	0.03	1.25			0.820528	0.05	0.04	0.08	0.06	0.09	0.05	0.09	0.03	0.03	0.03	0.07	0.02	0.02	0.04	0.02	0.04	0.02	0.02	0.03	0.03	0.02	0.03	0.06	0.03	0.07	0.04	0.06	0.07	0.02	0.43	0	0.04	0.03	0	0	0	0	0	0	0	0
19646	Rbbp4	4.75	2.72	1.63	1.66871			5.56e-09	5.73	5.47	8.57	5.23	4.87	3.46	4.62	4.24	4.11	3.89	3.38	3.85	5.71	3.75	4.4	3.62	2.69	3.4	2.73	3.39	2.88	1.93	1.89	1.54	2.8	3.92	1.88	3.5	1.94	2.99	2.36	3.13	1.58	1.73	1.25	2.31	1.51	1.66	1.03	1.31	0.36
236732	Rbm10	0.14	0.08	0.08	1.75			0.0187495	0.15	0.16	0.17	0.13	0.32	0.21	0.11	0.1	0.14	0.09	0.09	0.16	0.13	0.08	0.12	0.18	0.07	0.07	0.06	0.08	0.03	0.03	0.07	0.06	0.05	0.2	0.03	0	0.23	0.21	0.08	0.1	0.07	0.05	0.11	0.13	0.16	0.07	0.09	0	0
19652	Rbm3	1.46	2.44	1.52	1.60526			0.141297	1.31	1.69	2.76	1.67	1.72	0	1.75	1.55	2	1.04	1.51	1.71	1.36	0	1.85	1.56	1.06	1.31	1.32	1.27	1.93	2.35	4.87	2.36	3.77	4.44	3.06	3.08	1.09	3.31	3.03	4.82	3.41	3.65	1.55	1.21	0	0.77	0.78	0	0
60365	Rbm8a	4.13	2.25	1.34	1.6791			0.000539319	11.39	8.22	6.97	3.47	3.81	2.51	2.11	2.49	2.48	3.1	2.76	3.72	5.36	2.09	1.52	2.47	1.97	1.88	4.33	1.9	1.71	2.07	2.63	1.48	4.03	1.53	1.02	3.24	0.29	0.87	1.75	2.28	2.45	1.95	1.89	0.7	1.71	1.07	1.19	0.88	0
19659	Rbp1	11.54	34.01	31.12	2.69671			0.000419533	8.41	5.8	14.65	6.54	6.29	6.47	6.85	20.5	16.9	10.22	11.85	14.75	12.99	8.23	22.72	13.29	20.58	42	35.27	32.31	17.42	29.91	44.81	36.54	50.88	48.77	36.37	51.47	47.28	44.91	52.91	37.2	50.04	46.94	54.35	47.65	28.71	27.47	25.77	10.34	9.81
19663	Rbpms	0	0.2	0.32	Inf			0.00233591	0	0	0	0	0	0	0	0	0	0	0	0	0	0	0	0	0	0	0	0	0	0.19	0.37	0.35	0.59	0.66	0.24	0	0.17	0.35	0.73	0.45	0.39	0.53	0.36	0	0.36	0.17	0	0.78	0
19703	Renbp	0.15	0.27	0.2	1.35			0.645788	0	0.13	0.04	0.22	0.02	0	0.53	0.12	0.02	0	0.03	0.11	0.02	0.07	0.92	0.06	0	0.15	0.04	0.15	0.37	0.05	0.08	0.7	0.1	1.12	0.42	0.09	0.43	1.26	0	0.56	0.82	0.06	0.11	0.16	0	0	0	0	0
194590	Reps2	0.04	0	0.02	Inf			0.489455	0	0	0	0	0	0	0	0.39	0.22	0	0	0	0	0	0	0	0	0	0	0	0	0	0	0	0	0	0	0	0	0	0	0	0	0	0	0	0	0	0	0	0
19896	Rpl10a	23.86	26.4	38.54	1.45985			0.00562804	26.17	63.04	27.44	48.3	16.21	19.83	27.1	11.99	15.84	9.69	22.72	18.67	9.13	28.95	12.76	11.23	11.66	26.69	25.26	25.55	16.28	18.01	34.94	27.72	41.13	27.85	50.52	41.35	55.32	44.74	33.67	37.63	49.09	52.52	52.71	37.53	43.89	34.83	22.82	35.35	33.83
269261	Rpl12	27.7	43.15	45.29	1.55776			0.0012894	29.18	32.34	28.46	40.03	26.05	21.62	23.22	29.31	22.69	25.73	18.06	40.78	27.61	24.28	26.17	28.05	36.6	55.27	32.69	35.01	30.93	31.3	38.05	48.04	68.43	66.58	46.86	42.1	63.06	49.71	58.1	63.09	38.34	60.45	61.54	56.55	43	55.6	33.22	55.98	25.11
22121	Rpl13a	23.94	13.73	18.61	1.28641			0.193489	1.01	61.32	7.82	49.14	21.37	37.47	34.77	16.13	21.09	4.5	26.48	22.52	4.9	33.78	16.79	4.63	2.19	31.56	14.5	15.13	16.52	5.67	25.14	7.19	6.8	10.87	24.61	8.86	13.08	14.32	7.92	5.45	31.62	5.93	33.98	21.9	7.98	30.54	40.22	9.71	5.68
19921	Rpl19	10.99	4.84	13.76	2.27066			0.088279	2.01	27.08	0.91	30.88	9.1	20.92	23.21	1.53	5.69	1.31	12.49	5.47	1.98	20	2.34	0.65	0.91	5.44	4.37	7.88	5.25	2.69	7.68	3.16	1.66	3.82	14.53	2.19	11.21	5.94	2.51	2.57	23.31	3.17	19.87	21.55	0	19.44	26.92	1.36	2.53
20103	Rps5	17.59	24.82	27.05	1.08985			0.0916141	21.38	21.44	16.58	20.02	13.96	11.29	19.16	10.68	13.08	12.07	23.36	15.46	18.53	32.91	13.98	24.82	16.87	21.93	11.7	16.79	16.62	7.33	32.19	10.43	58.98	56.59	23.59	16	18.64	30.13	20.81	21.17	45.07	23.59	23.48	48.46	26.19	40.2	42.46	20.89	18.58
54170	Rragc	0.1	0.12	0.1	1.2			0.51314	0.12	0.07	0.14	0.1	0.12	0.07	0.11	0.06	0.08	0.09	0.07	0.13	0.09	0.06	0.22	0.13	0.1	0.14	0.1	0.08	0.05	0.12	0.11	0.08	0.21	0.18	0.15	0.25	0.08	0	0.11	0.11	0.09	0.23	0.1	0.08	0.12	0.11	0.15	0.06	0.08
52822	Rufy3	0.02	0.28	0.16	8			0.0140938	0	0	0	0	0.03	0.03	0	0	0	0.09	0.05	0.06	0	0.02	0.01	0	0.07	0.06	0.23	0.14	0.55	0.1	0.23	1.37	0.26	0.05	0.27	0.26	0.22	0.1	0.22	0.21	0.32	0.23	0.23	0.15	0.14	0.19	0.11	0	0
109232	Sccpdh	0	0.02	0.02	Inf			0.267468	0	0	0	0	0	0	0	0	0	0	0	0	0	0	0	0	0	0	0	0.02	0.01	0	0	0	0.11	0	0.13	0	0.06	0.03	0	0	0	0.16	0	0.04	0	0	0	0	0
100126824	Sco2	0.14	0.3	0.42	2.14286			0.00465154	0.36	0.09	0	0.48	0.27	0.27	0.04	0.26	0.26	0	0	0	0.04	0.07	0	0.09	0	0.41	0.19	0.11	0	0.51	0.66	0.23	0.65	0.36	0.44	0.39	0.57	0.39	0.75	0.48	0.41	0.55	0.52	0.44	0	0.26	0.35	0.23	1.01
105782	Scrib	0.04	0.01	0.02	2			0.0684213	0.08	0.09	0.05	0.03	0.04	0.02	0.04	0.02	0.01	0.03	0.01	0.03	0.06	0.02	0.01	0.01	0.01	0.03	0	0.02	0.01	0.01	0.02	0.01	0.02	0.02	0	0	0	0	0.05	0	0.11	0	0.05	0.01	0	0	0	0	0
72124	Seh1l	0.62	0.36	0.23	1.56522			0.000959058	0.56	0.45	1.06	0.54	0.63	0.65	0.42	1.38	0.56	0.27	0.35	0.36	0.38	0.24	1.47	0.33	0.4	0.28	0.19	0.41	0.15	0.17	0.28	0.85	0.4	0.45	0.41	0.25	0.27	0.23	0.5	0.51	0.36	0.31	0.17	0.2	0.26	0.26	0.2	0.14	0.12
80886	Senp3	0.08	0.04	0	Inf			0.0236068	0	0.12	0.04	0.08	0.08	0.22	0.07	0.02	0.11	0.01	0.08	0.11	0.02	0.12	0.11	0	0	0	0	0	0	0	0.01	0.44	0	0	0	0	0	0	0	0	0	0	0	0	0	0	0	0	0
20716	Serpina3n	0	0.2	0.39	Inf			5.1e-05	0	0	0	0	0	0	0	0	0	0	0	0	0	0	0	0	0	0	0.04	0.74	0.02	0.12	0.11	0.19	0.53	0.38	0.27	0.3	0.19	0.55	0.43	1.13	0.81	0.28	0.36	0.23	0.21	0.53	0.22	0.28	0.15
56086	Set	25.59	16.17	8.71	1.85649			0.000115087	65.86	34.58	41.62	30.67	32.42	30.14	18.92	12.41	14	20.33	13.64	16.82	24.66	16.01	11.83	10.08	20.04	14.41	15.62	11.76	12.27	23.36	13.5	12.16	26.71	22.48	11.62	17.5	12.06	15.75	10.96	18.56	10.73	7.26	8.45	10.83	6.7	5.65	6.2	6.3	5.49
101943	Sf3b3	2.41	1.71	1.25	1.40936			0.000357916	2.97	2.09	4.55	3.28	3.03	2.87	2.08	2.48	2.41	2.05	1.4	1.75	1.59	2.14	1.46	1.62	1.23	1.09	1.37	2.27	1.85	1.42	2.47	1.32	1.62	2.49	1.8	1.34	1.42	1.91	1.58	3.22	1.46	1.55	1.12	2.13	0.81	1.09	1.08	0.75	0.97
20401	Sh3bp1	0.27	0.12	0.22	1.83333			0.514865	0.41	0.38	1.05	0.29	0.27	0.16	0.12	0.33	0.14	0.05	0.07	0.19	0.32	0.09	0.12	0.1	0.08	0.11	0.12	0.3	0.02	0.07	0.05	0.25	0.16	0.14	0.08	0.33	0.7	0.42	0.08	1.65	0.62	0.19	0.03	0	0	0	0	0	0
20466	Sin3a	0.16	0.1	0.06	1.66667			0.000706258	0.15	0.16	0.29	0.18	0.28	0.19	0.1	0.22	0.17	0.07	0.15	0.14	0.15	0.08	0.07	0.11	0.07	0.18	0.07	0.11	0.03	0.04	0.05	0.25	0.02	0.04	0.28	0.12	0.06	0.08	0.03	0.06	0.15	0.04	0.03	0.14	0.03	0.05	0.05	0	0
20469	Sipa1	0.18	0.15	0.01	15			0.112666	0.85	0.02	0.04	0.04	0.06	0.05	0.07	0.07	0.06	0.65	0.06	0.06	0.02	0.54	0.05	0.38	1.04	0.01	0.01	0.05	0.03	0.02	0.01	0.04	0.05	0.03	0.1	0	0.02	0.13	0	0	0	0.01	0.01	0	0	0	0	0	0
75991	Slain2	0.03	0.02	0	Inf			0.205924	0.02	0	0.15	0	0	0	0	0	0	0	0.06	0.05	0.01	0	0.09	0	0.02	0.11	0.03	0.02	0	0	0	0	0	0	0	0	0	0	0	0.05	0.02	0	0	0	0	0	0	0	0
20499	Slc12a7	0.04	0.04	0.05	1.25			0.671312	0	0.01	0.05	0.03	0.03	0.03	0.04	0.09	0.01	0.02	0.04	0.07	0.03	0.05	0.05	0.02	0.05	0.04	0.03	0.02	0.07	0	0.02	0.04	0.02	0.05	0.09	0.05	0.08	0.1	0	0.05	0.22	0.05	0.04	0.11	0.01	0.03	0	0	0
20501	Slc16a1	1.28	3.41	4.22	2.66406			0.00328057	1.07	1.07	1.14	1.08	0.99	1.04	1.18	0.98	1.69	2.38	1.07	1.03	1.1	1.3	2.01	1.97	1.2	4.39	5.16	4.62	3.85	3.86	2.74	1.39	6.22	2.88	2.66	8.87	3.03	7.09	2.75	6.13	5.97	7.31	11.08	8.06	2.14	1.89	3.29	1.79	1.27
100434	Slc44a1	0.01	0	0.02	Inf			0.0230482	0	0	0	0.02	0	0.02	0	0	0	0	0.02	0.01	0.01	0.01	0.01	0	0	0	0	0	0	0	0	0	0	0	0	0	0	0	0.04	0	0.05	0	0	0	0	0.05	0.04	0.03	0
20874	Slk	0.35	0.56	0.42	1.33333			0.340379	0.16	0.45	0.63	0.2	0.36	0.22	0.22	0.34	0.3	0.26	0.24	0.56	0.46	0.45	0.37	0.26	0.5	0.34	0.8	0.48	0.89	0.22	1.67	0.17	1.06	0.16	0.16	0.4	0.9	0.29	1.41	0.31	0.34	0.21	0.24	0.19	0.92	0.67	0.2	0	0.66
83997	Slmap	0.04	0.15	0.26	3.75			0.0257187	0.01	0	0.03	0.05	0.17	0.03	0.02	0.12	0	0.01	0.04	0.02	0.02	0.04	0.09	0.02	0.03	0.05	0.21	0.05	0.07	0.09	0.16	0.6	0.15	0.22	0.11	0.23	0.22	0.44	0.24	0.23	0.19	0.31	0.34	0.18	0.09	0.13	0.18	0.08	1.38
93762	Smarca5	0.87	0.53	0.26	2.03846			5.59e-07	0.65	1.37	1.45	1.41	0.89	0.92	0.9	0.56	0.69	0.51	0.67	0.89	0.78	0.87	0.43	0.92	0.63	0.78	0.47	0.52	0.41	0.34	0.54	0.31	0.53	0.42	0.48	0.51	0.45	0.52	0.55	0.57	0.45	0.07	0.51	0.25	0.07	0.15	0.09	0	0.01
74255	Smu1	1.25	0.98	0.58	1.68966			0.000534322	1.66	1.05	2.05	1.39	1.25	1.99	1.35	1.33	1.02	0.62	1.09	1.45	0.93	0.86	0.76	0.74	0.95	1.81	0.9	0.67	0.62	0.73	1.16	0.45	1.26	1.3	1.19	0.82	0.27	0.43	1.06	1.03	2	0.38	0.93	0.47	0.55	0.45	0.49	0.39	0.19
20619	Snap23	1.09	1.06	0.95	1.0283			0.692945	1.08	0.59	2.03	1.1	1.48	1.21	0.76	0.79	1.05	0.61	0.55	0.9	1.01	2.76	0.5	1.36	1.72	0.96	0.61	0.66	0.55	0.75	1.64	0.98	1.83	0.98	0.68	0.65	0.67	1.04	1.4	2.06	0.94	1.22	0.44	1.18	0.31	0.77	0.86	0.95	1.32
20649	Sntb1	0.22	0.71	1.2	3.22727			1.39e-06	0.03	0.12	0.15	0.04	0.2	0.09	0.19	0.66	0.23	0.13	0.12	0.61	0.08	0.06	0.61	0.18	0.36	0.72	0.68	0.51	0.27	0.43	0.93	1.08	0.85	1.04	1.52	0.9	0.75	0.91	1.21	1.38	0.86	0.72	0.92	1.07	0.75	1.35	0.99	2.93	1.24
76742	Snx27	0.16	0.08	0.1	1.6			0.10533	0.2	0.07	0.46	0.12	0.17	0.13	0.16	0.12	0.08	0.03	0.18	0.27	0.07	0.27	0.12	0.12	0.15	0.25	0.09	0.12	0.1	0.02	0.1	0.04	0	0	0	0.17	0.04	0.39	0	0.1	0.16	0.05	0.24	0.15	0.07	0.1	0.04	0.08	0
209131	Snx30	0.04	0.04	0	Inf			0.139884	0	0	0	0	0.05	0.01	0.02	0.03	0.31	0.03	0.02	0.03	0	0.02	0.04	0	0	0	0	0	0	0.05	0	0.21	0.08	0	0.13	0	0	0	0	0	0	0	0	0	0	0	0	0	0
20652	Soat1	0.08	0.28	0.14	1.75			0.0411631	0.02	0.07	0.12	0	0.03	0.05	0.13	0.14	0.07	0	0.05	0.09	0.06	0.13	0.26	0	0.06	0.41	0.22	0.33	0.23	0.17	0.25	0.4	0.26	0.47	0.57	0.57	0.11	0.55	0.16	0.53	0.68	0	0	0	0	0	0	0	0
223920	Soat2	0.28	0.86	1.64	3.07143			3.75e-07	0.07	0.21	0.14	0.26	0.2	0.04	0.48	0.28	0.19	0.55	0.43	0.25	0.35	0.38	0.42	0.51	0.4	0.8	0.85	0.71	0.51	0.82	1.2	0.62	0.97	1.36	1.55	1.65	0.97	1.61	2.18	2.94	1.7	2.43	2.24	2.72	1.66	2.63	1.87	1.81	0.53
72572	Spats2	0.13	0.07	0.06	1.85714			0.439706	0.95	0.13	0.24	0.09	0.04	0.02	0.06	0.05	0.05	0.06	0.09	0.03	0.07	0.06	0.05	0.04	0.07	0.07	0.08	0.03	0.31	0	0.03	0.02	0.04	0.09	0.05	0	0.06	0.15	0	0	0	0.33	0.49	0	0	0	0	0	0
110809	Srsf1	26.82	24.09	15.97	1.50845			0.000100064	32.27	26.2	47.52	23.49	29.63	31.62	23.11	24.59	28.66	21.65	22.38	28.43	19.73	22.42	20.64	22.19	18.73	27.21	18.23	24.4	30.06	16.23	26.11	18.57	32.55	34.12	20.69	23.77	14.57	23.25	17.91	26.95	19.16	16.61	22.73	18.91	12.29	16.51	12.92	14.8	11.13
20440	St6gal1	0.11	0.68	0.5	4.54545			0.00770115	0	0	0	0	0	0	0.1	0.2	0.09	0.26	0.09	0.03	0.22	0.09	0.51	0.27	0.23	1.41	1.44	0.52	1.12	0.19	0.57	0.28	1.13	0.4	0.64	1.57	0.28	1.65	0.51	0.66	0.79	0.62	0.46	1.46	0.63	0.11	0	0.26	0
20850	Stat5a	0.17	0.15	0.18	1.05882			0.875344	0.15	0.09	0.34	0.18	0.16	0.16	0.21	0.17	0.17	0.11	0.12	0.26	0.15	0.1	0.16	0.14	0.11	0.17	0.12	0.28	0.14	0	0.08	0.4	0.12	0.15	0.14	0.17	0.19	0.17	0	0.24	0.21	0.37	0.52	0.55	0	0.2	0.19	0.02	0.21
53416	Stk39	0.07	0.08	0.03	2.33333			0.378451	0	0	0	0.1	0.18	0.05	0.07	0.17	0.15	0.12	0.03	0.11	0	0	0	0.2	0.03	0.05	0	0	0	0	0.18	0.27	0	0.02	0.19	0	0	0	0	0	0	0	0.01	0.49	0	0	0	0	0
58231	Stk4	0.24	0.19	0.08	2.375			5.64e-05	0.2	0.06	0.42	0.33	0.25	0.34	0.28	0.22	0.28	0.14	0.21	0.37	0.09	0.17	0.19	0.12	0.11	0.32	0.22	0.24	0.18	0.16	0.16	0.29	0.17	0.17	0.15	0.1	0.16	0.18	0.17	0.27	0.14	0.07	0.13	0	0.04	0.02	0.07	0	0
53331	Stx7	0.15	0.38	0.53	2.53333			0.00406605	0.06	0.08	0.08	0.21	0.17	0.21	0.09	0.22	0.21	0	0.13	0.26	0.13	0.17	0.27	0.11	0.16	0.25	0.2	0.29	0.36	0.17	0.71	0.43	0.81	0.65	0.43	0.39	0.82	0.89	0.61	1.79	0.66	0.45	0.14	0.31	0.26	0.56	0.37	0.89	0.33
58911	Sumf1	0.01	0.05	0.09	5			0.00667997	0	0	0	0.01	0.05	0.03	0	0.02	0.01	0	0	0	0	0	0	0	0	0	0	0	0	0.01	0.08	0.1	0.1	0.18	0.13	0.08	0.12	0.1	0.29	0.13	0.23	0.2	0	0.12	0.1	0.06	0.07	0	0
225115	Svil	0.08	0.12	0.19	1.58333			0.0357611	0.02	0.03	0.08	0.08	0.06	0.11	0.1	0.1	0.13	0.1	0.13	0.11	0.03	0.05	0.05	0.07	0.13	0.07	0.05	0.05	0.09	0.02	0.1	0.15	0.1	0.36	0.19	0.25	0.1	0.43	0.44	0.25	0.47	0.15	0.35	0.35	0.19	0.05	0.09	0	0.01
56403	Syncrip	3.33	3.77	4.25	1.12732			0.271656	3.06	2.83	7.06	3.71	3.3	3.38	3.53	3.78	3.76	2.77	2.53	2.64	2.27	2.85	2.48	1.75	3.5	3.68	2.11	2.83	2.58	2.77	5.42	3.63	7.75	4.81	4.4	5.2	4.21	5.1	6.96	4.53	3.63	7.28	4.78	5.1	5.58	5.22	3.85	4.29	2.79
230908	Tardbp	6.88	7.2	5.9	1.04651			0.387079	6.79	8.3	14.28	5.1	7.33	10.21	5.03	6.83	5.53	5.21	5.48	5.75	6.3	5.85	5.28	4.29	3.97	10.12	4.84	7.19	8.19	6.02	9.89	3.72	14.04	8.28	5.81	9.07	5.11	6.92	8.86	9.33	6.66	7.23	9.06	6.74	5.03	4.47	6.13	5.31	3.62
77862	Thyn1	0.17	0.1	0.07	1.7			0.00843099	0.12	0.21	0.4	0.13	0.2	0.24	0.2	0.11	0.12	0.13	0.11	0.08	0.2	0.13	0.22	0.09	0.07	0.16	0.14	0.12	0	0	0	0	0.29	0.11	0.2	0.24	0.11	0	0	0	0	0.21	0.18	0.2	0	0	0	0	0
94242	Tinagl1	0.09	0.23	0.2	2.22222			0.0177064	0	0	0	0.21	0.03	0.1	0.03	0.22	0.05	0.16	0.26	0.11	0.04	0.05	0.09	0.16	0.23	0.15	0.34	0.15	0.07	0.31	0.3	0.21	0.38	0.18	0.27	0.11	0.07	0.14	0.15	0.18	0.22	0	0	0	0.25	0.16	0.2	0.44	0.21
52837	Tmx4	0.08	0.24	0.29	3			0.220237	0.08	0.15	0	0.06	0.08	0.02	0.16	0.09	0.08	0.05	0.11	0.11	0.13	0.09	0	0.17	0.04	0.36	0.17	0.2	0.01	0.26	0.45	0.3	0	0.45	0.42	0.67	0.38	0.14	0.69	1.77	0.98	0.11	0	0.45	0	0	0	0	0
21968	Tom1	0.1	0.23	0.37	2.3			0.000228938	0.08	0.03	0.09	0.07	0.09	0.11	0.1	0.16	0.12	0.07	0.08	0.14	0.12	0.08	0.18	0.08	0.11	0.48	0.12	0.2	0.13	0.11	0.29	0.28	0.26	0.34	0.38	0.21	0.15	0.34	0.4	0.49	0.44	0.33	0.17	0.37	0.34	0.31	0.48	0.26	0.94
21985	Tpd52	0.25	0.55	0.38	1.52			0.0552023	0.09	0	0.52	0.28	0.18	0.25	0.14	0.63	0.61	0.18	0	0.43	0.16	0.07	0.19	0.42	0.21	0.23	0.77	0.98	0.36	0.2	1.1	0.57	0.38	0.24	1.11	0.44	0.83	1.08	0.29	0.27	0.89	0.36	0.13	0.42	0	0.39	0.36	0.31	0
59069	Tpm3	13.39	17.41	16.75	1.0394			0.285192	15.46	9.68	21.15	11.24	11.91	13.92	12.74	11.13	24.25	14.14	9.65	8.92	10.45	11.61	14.59	14.32	11.66	14.62	10.98	12.5	11.26	14.33	17.76	35.89	18.62	28.46	18.55	18.91	13.17	29.99	12.28	29.03	33.74	21.05	20.79	14.89	14.47	13.89	18.06	7.99	9.8
326618	Tpm4	2.72	4.58	4.12	1.51471			0.049649	3.21	2.18	6.68	2.27	3.27	4.8	2	2.85	2.06	1.4	1.73	2.18	2.04	1.85	2.23	1.07	2.16	4.79	3.94	4.53	2.68	3.89	7.61	6.09	5.94	6.87	5.38	3.34	4.32	8	5.34	8.55	6.82	5.11	5.43	4.29	4.52	3.22	3.25	2.57	1.86
217069	Trim25	0.6	0.75	1.08	1.44			0.123374	0.25	0.37	0.59	0.78	0.4	1.02	0.95	0.42	1.5	0.26	0.21	1.4	0.27	0.23	0.41	0.33	0.35	1.36	0.29	0.61	0.52	0.67	1.26	0.62	0.88	1.32	0.77	0.78	1.08	1.07	1.29	1.24	1.36	2.73	3.55	1.3	0.79	0.69	0.65	0.44	0.49
69807	Trim32	0.03	0.04	0.04	1.33333			0.730639	0.04	0.04	0.03	0.05	0.04	0.04	0.03	0	0.04	0.03	0.01	0.04	0	0	0	0	0.01	0.01	0.05	0	0.12	0.04	0.18	0.01	0	0.01	0.02	0.03	0.05	0.02	0.09	0.18	0.07	0.13	0.07	0.05	0	0	0	0	0
22051	Trip6	0.03	0.02	0.03	1.5			0.86793	0.02	0.02	0.06	0.06	0.04	0.04	0.02	0.03	0.02	0	0.02	0.04	0.01	0	0.03	0	0	0	0	0	0	0	0	0	0.05	0.15	0.02	0	0	0	0.21	0	0.05	0.06	0.14	0.01	0	0	0	0	0
76357	Trmt5	0.19	0.13	0.11	1.46154			0.66533	0.37	0.32	0.13	0.08	0.09	0.3	0.16	0.07	0	0.35	0.23	0.05	0.18	0.39	0.15	0.05	0.05	0	0	0.28	0.08	0.62	0.22	0.06	0.07	0	0.11	1.46	0	0.4	0.03	0	0.06	0.02	0.01	0	0	0	0	0	0
78829	Tsc22d4	0.09	0.12	0	Inf			0.025367	0.23	0	0.22	0.02	0	0.19	0.11	0.02	0.15	0	0.15	0.03	0	0.17	0.12	0.06	0	0.35	0	0.08	0.12	0	0.64	0.13	0	0	0	0	0	0	0	0	0	0	0	0	0	0	0	0	0
52588	Tspan14	0.06	0.06	0	Inf			0.00106891	0.06	0	0.09	0.04	0.08	0.07	0.07	0.05	0.06	0	0.06	0.1	0.07	0	0.1	0.07	0.06	0.02	0	0.05	0.1	0	0.06	0.02	0.09	0	0.29	0	0	0	0	0	0	0	0	0	0	0	0	0	0
545486	Tubb1	10.55	8.97	3.65	2.45753			5.95e-06	12.17	8.68	20.22	11	11.76	12.25	9.34	9.34	10.45	8.68	7.01	10.29	10.86	7.41	8.77	8.09	8.13	10.05	12.25	9.62	7.37	8.21	11.09	5.44	14.11	6.96	6.29	9.2	9.88	6.72	8.78	7.92	5.61	0	8.97	2.73	0	0	0	0	0
52700	Txndc17	1.47	2.72	3.59	1.85034			3.7e-07	2.48	0.9	2.61	1.19	1.32	1.05	1.2	1.2	1.38	1.19	0.98	1.38	2.19	0.71	2.21	3.1	0.68	2.57	2.07	1.96	3.1	1.75	2.69	3.41	4.57	4	2.72	3.22	1.64	3.73	3.45	4.87	3.94	3.41	3.11	3.62	4.33	4.91	3.42	4.78	2.89
108121	U2af1	1.34	1.18	1.05	1.13559			0.567459	0.56	1.37	3.17	1.61	2.31	1.81	0.63	1.22	1.58	0.39	1.04	1.5	0.39	0.93	1.61	0.37	0.6	1.53	0.31	1.44	1.28	1.93	2.38	1.6	0.79	1.01	0.91	1.02	1.37	0.98	0.59	3.96	1.08	0.66	1.48	1.2	0.45	1.21	1.01	0.67	0.79
231380	Uba6	0.27	0.28	0.36	1.28571			0.424654	0.22	0.21	0.35	0.24	0.39	0.25	0.27	0.29	0.26	0.21	0.27	0.32	0.19	0.16	0.37	0.27	0.19	0.4	0.18	0.21	0.22	0.1	0.25	0.16	0.61	0.55	0.24	0.26	0.26	0.27	0.14	0.26	0.42	1.18	0.27	0.27	0.21	0.26	0.22	0.32	0.11
74153	Uba7	0.07	0.08	0.1	1.25			0.480802	0.12	0.01	0.06	0.06	0.04	0.09	0.08	0.22	0.1	0.04	0.03	0.05	0.12	0.03	0.05	0.03	0.04	0.06	0.22	0.3	0.07	0.04	0.02	0.02	0.03	0.05	0.05	0.09	0.05	0.11	0	0.31	0.07	0.05	0.01	0.13	0.12	0.14	0.16	0.06	0.22
22288	Utrn	0.02	0.09	0.18	4.5			2.39e-05	0.01	0.01	0.01	0.05	0.09	0.02	0.01	0.03	0.01	0.01	0.01	0.05	0.02	0	0.01	0.01	0.03	0.21	0.02	0.01	0.02	0.02	0.05	0.08	0.22	0.04	0.32	0.11	0.21	0.09	0.17	0.24	0.45	0.15	0.13	0.1	0.17	0.19	0.08	0.22	0.23
22371	Vwf	0.04	0.15	0.08	2			0.27989	0.01	0.06	0.02	0.05	0.02	0.02	0.03	0.01	0	0.11	0.02	0.01	0.02	0.13	0.02	0.18	0.01	0.28	0.04	0.03	0.06	0.32	0.07	0.02	0.64	0.02	0.08	0.07	0.04	0.1	0.9	0.04	0.12	0.04	0.05	0.01	0.01	0.01	0.01	0	0
72515	Wdr43	0.54	0.35	0.13	2.69231			2.33e-06	0.82	0.91	1.05	0.77	0.78	0.69	0.5	0.3	0.46	0.28	0.27	0.32	0.35	0.35	0.29	0.27	0.3	0.4	0.43	0.26	0.27	0.28	0.34	0.18	0.58	0.56	0.36	0.28	0.23	0.09	0.36	0.28	0.11	0.25	0.21	0	0.15	0.17	0.09	0	0
104082	Wdr7	0.02	0.01	0.01	2			0.301317	0.01	0.01	0.01	0.01	0.01	0	0.02	0.01	0.04	0.01	0.01	0.1	0.04	0.02	0.01	0.02	0.01	0	0	0	0	0	0	0	0.02	0.01	0.01	0.01	0.03	0.02	0.12	0	0.01	0	0	0	0	0	0	0	0
103573	Xpo1	1.78	1.33	1.07	1.33835			4.1e-05	1.92	1.83	2.51	1.76	2.04	1.84	1.7	1.89	1.94	1.54	1.46	1.61	2.13	1.17	1.41	1.68	1.36	1.35	1.13	0.87	1.18	0.82	1.04	0.97	2.01	1.95	1.55	1.08	1.06	1.46	1.51	1.77	1.46	1.07	1.18	0.98	1.06	0.72	1.09	1.37	0.61
24128	Xrn2	0.47	0.39	0.39	1.20513			0.753174	0.25	0.41	0.59	0.67	0.42	0.57	0.78	0.76	0.87	0.12	0.27	0.2	0.31	0.32	0.51	0.28	0.16	0.27	0.2	0.26	0.21	0.11	0.42	1.56	0.34	0.4	0.46	0.29	0.96	0.19	0.76	0.57	0.99	0.52	0.48	0.76	0.25	0.5	0.24	0.04	0.21
77254	Yif1b	0.22	0.34	0.45	1.54545			0.0148171	0.19	0.52	0.28	0.25	0.08	0.07	0.22	0.3	0.2	0.24	0.11	0.21	0.23	0	0.34	0.24	0.08	0.47	0.61	0.52	0.02	0.35	0.34	0.15	0.48	0.44	0.34	0.42	0.61	0.56	0.34	0.74	0.54	0.49	0.76	0.45	0	1.11	0.46	0	0.23
228994	Ythdf1	0.29	0.23	0.04	5.75			0.000826212	0.31	0.27	0.76	0.11	0.57	0.16	0.12	0.14	0.26	0.18	0.4	0.19	0.31	0.51	0.12	0.15	0.11	0.11	0.18	0	0.14	0.74	0.07	0.22	0.52	0.27	0.27	0	0	0	0.17	0.32	0.31	0	0	0	0	0	0	0	0
[truncated: 4 more columns]

## Sheet: Sheet2
Gene.ID	GeneSymbol	Cluster1	Cluster2	Cluster3	Ratio	specific phase	specificity	FDR	E12.5.1.Exp018736	E12.5.2.Exp018737	E12.5.3.Exp018738	E13.5.1.Exp018739	E13.5.2.Exp018740	E13.5.3.Exp018741	E14.5.1.Exp018742	E14.5.2.Exp018743	E14.5.3.Exp018744	E15.5.1.Exp018745	E15.5.2.Exp018746	E15.5.3.Exp018747	E16.5.1.Exp018748	E16.5.2.Exp018749	E16.5.3.Exp018750	E17.5.1.Exp018751	E17.5.2.Exp018752	E17.5.3.Exp018753	E18.5.1.Exp018754	E18.5.2.Exp018755	E18.5.3.Exp018756	D1.1.Exp018757	D1.2.Exp018758	D1.3.Exp018759	D3.1.Exp018760	D3.2.Exp018761	D3.3.Exp018762	D5.1.Exp018763	D5.2.Exp018764	D5.3.Exp018765	W1.1.Exp018766	W1.2.Exp018767	W1.3.Exp018768	W2.1.Exp018769	W2.2.Exp018770	W2.3.Exp018771	W3.1.Exp018772	W3.2.Exp018773	W3.3.Exp018774	W6.1.Exp018775	W6.2.Exp018776
26364	Adgre5	0.06	0.05	0.02	2.5			0.500174	0	0	0	0.01	0.03	0	0	0.05	0.72	0.03	0	0.03	0.02	0.01	0.03	0.05	0.09	0.01	0	0.1	0.05	0	0.03	0.05	0.06	0.1	0.05	0.06	0	0.1	0	0.06	0.07	0	0	0	0	0	0	0	0
70719	Arhgap45	0.09	0.08	0.03	2.66667			0.000450072	0.08	0.07	0.16	0.04	0.05	0.09	0.1	0.11	0.08	0.11	0.06	0.12	0.08	0.08	0.14	0.05	0.09	0.1	0.06	0.11	0.14	0.05	0.02	0.07	0.12	0.05	0.07	0.16	0.07	0.06	0.09	0	0.1	0.04	0	0.01	0	0	0	0	0
19285	Cavin1	0.14	0.51	0.22	2.31818	2	Cluster Enriched	0.0170218	0	0.14	0.07	0.25	0.18	0.15	0.29	0.18	0.11	0.08	0.21	0.35	0.02	0	0.08	0	0.18	0.17	0.43	0.61	0.17	0.83	1.15	1.19	0.48	0.15	0.76	1.3	0.19	0.22	0.69	0.16	0.41	0.43	0.41	0.18	0	0	0	0	0
12654	Chil1	0	0.04	0	Inf	2	Cluster Enriched	0.00177815	0	0	0	0	0	0	0	0.02	0.01	0	0	0	0	0	0	0	0.07	0.15	0.06	0.12	0.09	0	0	0	0	0	0	0	0	0	0	0	0	0	0	0	0	0	0	0	0
12655	Chil3	0.05	3.43	1.75	35			0.0540789	0	0	0	0	0	0	0	0.24	0.07	0.04	0.18	0.25	0	0	0	0.51	0.56	3.16	7.58	10.08	2.41	1.67	1.77	5.83	2.53	2.19	2.91	18.87	1.63	2.99	4.88	0.96	1.15	0.06	0.1	0.1	0.12	0.1	0.06	0.08	0.03
224171	Cip2a	0.09	0.01	0	9	1	Cluster Enriched	2.67e-09	0.13	0.15	0.09	0.15	0.12	0.16	0.16	0.03	0.08	0.05	0.01	0.1	0.08	0.04	0.05	0.02	0.01	0.09	0	0	0	0	0	0	0	0	0	0	0	0	0	0	0	0	0	0	0	0	0	0	0
56419	Diaph3	2.68	0	0	Inf	1	Cluster Enriched	0.0615536	0	0.02	0.05	0.03	13.22	0.02	0.04	13.45	13.36	0	0	0	0.04	0.03	0	0	0	0	0	0	0	0	0	0	0	0	0	0	0	0	0	0	0	0	0	0	0	0	0	0	0
230249	Ecpas	0.4	0.26	0.31	1.29032			0.0297814	0.41	0.78	0.49	0.31	0.35	0.35	0.37	0.31	0.38	0.27	0.57	0.31	0.36	0.55	0.22	0.12	0.4	0.34	0.2	0.16	0.2	0.12	0.46	0.22	0.3	0.34	0.32	0.31	0.22	0.46	0.24	0.42	0.48	0.49	0.25	0.25	0.32	0.32	0.28	0.33	0.16
27224	Eloa	0.05	0.05	0.06	1.2			0.949939	0.06	0.08	0.08	0.13	0.06	0.03	0.18	0.03	0.01	0	0	0	0.03	0.09	0.02	0.02	0	0.04	0	0.03	0.03	0.02	0.24	0.05	0.02	0.09	0.09	0.03	0.11	0.16	0.07	0	0.09	0	0.13	0.07	0	0.18	0.07	0	0
66387	Gm49405	0	0.05	0.7	14	3	Cluster Enriched	0.00261654	0	0	0	0	0	0	0	0	0	0	0	0	0	0	0	0	0	0	0	0	0	0	0	0	0.17	0	0.39	0	0.44	1.25	0	0	0	0.58	0.24	0.43	0.7	0.87	0.5	0.92	3.79
110355	Grk2	0.28	0.08	0.05	3.5	1	Cluster Enriched	0.497303	0.01	0	0.05	0	0.04	0.03	0	0.05	0.07	0.03	0.03	0.05	0.04	0.05	3.71	0	0	0	0	0.03	0.18	0.03	0.17	0.04	0	0.39	0.06	0.15	0.07	0.15	0.04	0.37	0.07	0	0	0	0	0	0	0	0
225884	Gstp3	3.46	9.44	22.89	2.42479	3	Cluster Enriched	0.0141902	0	0	0	0	0	0	2.4	11.15	14.34	2.24	3.43	6.6	2.06	3.35	6.32	6.15	4.5	14.03	13.22	10.54	2.62	7.56	5.48	5	13.42	14.18	16.58	17.13	26.13	15.7	20.6	11.53	25.98	18.57	31.34	22.28	25.49	22.88	19.6	120.51	4.94
236312	Ifi209	0	0.14	0.06	2.33333	2	Cluster Enriched	0.120672	0	0	0	0	0	0	0	0	0	0	0	0	0	0	0	0.01	0.05	0.04	0.09	0.17	0	0.06	0.22	0.04	0.1	0.07	0.8	0.16	0.03	0.03	0.11	0	0.71	0	0.04	0.03	0	0	0	0	0
76464	Knl1	0.01	0	0	Inf	1	Cluster Enriched	0.0238404	0	0	0	0	0.03	0.03	0.01	0.01	0.01	0	0	0	0	0	0	0	0	0	0	0	0	0	0	0	0	0	0	0	0	0	0	0	0	0	0	0	0	0	0	0	0
67949	Nifk	0.6	0.46	0.04	11.5			0.00217113	0.61	0.75	1.01	1.43	0.57	1.14	0.43	0.1	0.53	0.19	0.14	1.35	0.15	0.63	0	0.15	0.19	0.29	0.24	1.27	1.89	0	0	0	0.33	1	0.11	0.01	0	0.11	0.15	0	0.23	0	0	0	0	0	0	0	0
432940	Otulin	0.01	0.01	0	Inf			0.140735	0	0	0	0	0	0	0	0.03	0.06	0	0.02	0.06	0	0	0	0	0	0	0	0	0	0	0	0	0.05	0	0.02	0	0	0	0	0	0	0	0	0	0	0	0	0	0
56401	P3h1	0.08	0.18	0.08	2.25	2	Cluster Enriched	0.0482595	0.07	0	0.09	0.04	0.04	0.12	0.11	0.11	0.07	0.09	0.12	0.17	0.06	0.03	0.07	0.09	0.2	0.21	0.14	0.31	0.25	0.09	0.35	0.09	0.19	0.18	0.09	0.13	0.14	0.13	0	0.65	0.05	0.13	0.13	0	0.02	0.02	0	0	0
68026	Pclaf	0.52	0.1	0	5.2	1	Cluster Enriched	0.000673102	1.94	0.19	0.36	0.37	0.57	0.36	1.42	0	0.13	0.16	0.45	0.56	0.84	0.31	0.13	0.13	1.04	0	0	0	0	0	0	0	0	0	0	0	0	0	0	0	0	0	0	0	0	0	0	0	0
72657	Selenoh	1.38	0.36	0.16	3.83333	1	Cluster Enriched	0.00220324	0.98	0.68	5.13	0.61	0	2.84	3.36	1.74	1.4	0	0.77	0.89	1.13	0.24	0.86	0.55	0	1.14	0	0	0	0.4	0	0.17	1.1	0.39	0.51	0	0	0	0	0	0	1.48	1.4	0	0	0	0	0	0
69551	2310022B05Rik	0.01	0	0	Inf	1	Cluster Enriched	0.259759	0	0	0	0	0.1	0.03	0	0	0	0	0	0	0	0	0	0	0	0	0	0	0	0	0	0	0	0	0	0	0	0	0	0	0	0	0	0	0	0	0	0	0
192663	Abcg4	0.01	0	0	Inf	1	Cluster Enriched	7.2e-05	0.03	0.02	0	0.02	0.04	0	0	0	0	0.04	0.01	0.01	0.03	0.02	0	0	0	0	0	0	0	0	0	0	0	0	0	0	0	0	0	0	0	0	0	0	0	0	0	0	0
11519	Add2	1.36	0.45	0.02	3.02222	1	Cluster Enriched	2.02e-12	1.17	0.76	2.22	1.44	1.47	1.93	1.68	1.21	1.44	0.86	0.99	1.24	2.06	1.28	0.58	1.15	0.86	0.76	0.39	0.63	0.51	0.29	0.18	0.09	0	0.38	0.13	0.12	0.24	0.02	0	0	0	0	0	0	0	0	0	0	0
68743	Anln	0.14	0.03	0	4.66667	1	Cluster Enriched	1.9e-05	0.07	0.09	0.21	0.08	0.22	0.2	0.43	0.11	0.13	0.05	0.05	0.11	0.16	0.1	0.04	0.03	0.1	0.25	0	0	0	0	0	0	0	0	0	0	0	0	0	0	0	0	0	0	0	0	0	0	0
11766	Ap1g2	0.09	0.04	0	2.25	1	Cluster Enriched	0.00594911	0.04	0.09	0.23	0.07	0.34	0.06	0.07	0.11	0.07	0.06	0.03	0.04	0.11	0.03	0.04	0.03	0.01	0.36	0	0	0	0	0	0	0.03	0.08	0.02	0	0	0	0	0	0	0	0	0	0	0	0	0	0
66929	Asf1b	0.49	0.05	0	9.8	1	Cluster Enriched	1.57e-07	0.84	0.44	0.86	0.88	0.59	0.48	1.01	0.29	0.35	0.55	0.71	0.31	0	0	0	0	0.26	0.28	0	0	0	0	0	0	0	0	0	0	0	0	0	0	0	0	0	0	0	0	0	0	0
70472	Atad2	0.12	0.03	0	4	1	Cluster Enriched	7.15e-06	0.12	0.06	0.08	0.15	0.12	0.3	0.08	0.04	0.09	0.05	0.18	0.07	0.34	0.08	0.02	0.09	0.12	0.04	0	0	0	0	0.02	0.01	0	0.04	0.01	0	0	0	0	0	0	0	0	0	0	0	0	0	0
237877	Atad5	0.01	0	0	Inf	1	Cluster Enriched	0.010566	0.05	0.04	0	0.05	0	0.01	0	0	0	0	0	0	0.01	0.02	0	0	0	0	0	0	0	0	0	0	0	0	0	0	0	0	0	0	0	0	0	0	0	0	0	0	0
20878	Aurka	0.06	0	0	Inf	1	Cluster Enriched	9.99e-08	0.07	0.12	0.08	0.13	0.08	0.05	0.09	0	0.09	0	0.05	0.03	0.08	0	0.03	0	0	0	0	0.02	0.02	0	0	0	0	0	0	0	0	0	0	0	0	0	0	0	0	0	0	0	0
20877	Aurkb	0.34	0.02	0	17	1	Cluster Enriched	1.12e-10	0.23	0.22	0.79	0.33	0.68	0.25	0.3	0.41	0.23	0.18	0.28	0.29	0.25	0.42	0.22	0.13	0.09	0	0	0	0	0	0	0	0	0	0	0	0	0	0	0	0	0	0	0	0	0	0	0	0
65964	B230120H23Rik	0.08	0.01	0	8	1	Cluster Enriched	3.06e-09	0.14	0.03	0.07	0.05	0.03	0.05	0.11	0.18	0.07	0.07	0.04	0.12	0.04	0.09	0.05	0	0	0	0.04	0.03	0	0	0	0	0	0	0	0	0	0	0	0	0	0	0	0	0	0	0	0	0
53325	Banp	0.05	0	0	Inf	1	Cluster Enriched	0.084156	0.01	0.35	0	0	0.15	0.21	0	0	0	0	0	0	0	0	0	0	0	0	0	0	0	0	0	0	0	0	0	0	0	0	0	0	0	0	0	0	0	0	0	0	0
11799	Birc5	0.26	0.01	0	26	1	Cluster Enriched	2.47e-05	0.65	0.49	0.55	0.4	0.3	0.53	0.36	0	0.1	0.45	0.08	0	0	0	0	0.13	0.04	0	0	0	0	0	0	0	0	0	0	0	0	0	0	0	0	0	0	0	0	0	0	0	0
12144	Blm	0.04	0	0	Inf	1	Cluster Enriched	0.270682	0.01	0.01	0	0	0.04	0.01	0	0	0	0.02	0.01	0.52	0.01	0.01	0	0	0	0	0	0	0	0	0	0	0	0	0	0	0	0	0	0	0	0	0	0	0	0	0	0	0
213895	Bms1	0.07	0.02	0	3.5	1	Cluster Enriched	2.14e-05	0.07	0.17	0.04	0.15	0.08	0.17	0.11	0.04	0.04	0.03	0.06	0.05	0.04	0.04	0	0.02	0.01	0	0	0	0	0	0.14	0.01	0.03	0.02	0.03	0	0	0	0	0	0	0	0	0	0	0	0	0	0
12189	Brca1	0.01	0	0	Inf	1	Cluster Enriched	0.0161774	0.01	0.01	0	0	0.01	0.03	0	0	0	0.04	0	0.01	0	0	0	0	0	0	0	0	0	0	0	0	0	0	0	0	0	0	0	0	0	0	0	0	0	0	0	0	0
12229	Btk	0.15	0.06	0.01	2.5	1	Cluster Enriched	0.000344115	0.12	0.29	0.46	0.15	0.27	0.22	0.12	0.07	0.07	0.04	0.08	0.07	0.08	0.12	0.05	0.04	0.04	0.07	0.34	0.06	0.03	0.01	0.03	0.02	0.09	0	0.05	0.1	0.04	0.02	0	0	0	0	0	0	0	0	0	0	0
12236	Bub1b	0.05	0	0	Inf	1	Cluster Enriched	0.000722724	0.06	0.04	0.22	0.04	0.11	0.08	0.04	0.01	0.06	0.02	0.01	0.02	0	0	0	0	0	0	0	0	0	0	0	0	0	0	0	0	0	0	0	0	0	0	0	0	0	0	0	0	0
12428	Ccna2	0.18	0.01	0	18	1	Cluster Enriched	1.99e-06	0.52	0.01	0.35	0.22	0.22	0.2	0.18	0.05	0.35	0.04	0.06	0.09	0.19	0.19	0	0.06	0.01	0	0	0	0	0	0	0	0	0	0	0	0	0	0	0	0	0	0	0	0	0	0	0	0
12442	Ccnb2	0.01	0	0	Inf	1	Cluster Enriched	0.354883	0	0.11	0.01	0	0	0	0	0	0	0	0	0	0	0	0	0	0	0	0	0	0	0	0	0	0	0	0	0	0	0	0	0	0	0	0	0	0	0	0	0	0
12445	Ccnd3	0.2	0.03	0.02	6.66667	1	Cluster Enriched	0.00010917	0.46	0.24	0.16	0.24	0.25	0.41	0.52	0.04	0.06	0	0.33	0.1	0.12	0	0.03	0.15	0.04	0.08	0	0	0	0	0	0	0	0.05	0.04	0	0	0	0	0.11	0.2	0	0	0	0	0	0	0	0
107995	Cdc20	0.03	0	0	Inf	1	Cluster Enriched	0.000183396	0.07	0.07	0.08	0.07	0.04	0.06	0.1	0	0.02	0	0	0	0	0	0	0	0	0	0	0	0	0	0	0	0	0	0	0	0	0	0	0	0	0	0	0	0	0	0	0	0
12544	Cdc45	0.1	0	0	Inf	1	Cluster Enriched	0.0026019	0.03	0.06	0.47	0.31	0.01	0.01	0.2	0.01	0.06	0	0.16	0.1	0.04	0.03	0	0	0	0	0	0	0	0	0	0	0	0	0	0	0	0	0	0	0	0	0	0	0	0	0	0	0
23834	Cdc6	0.04	0	0	Inf	1	Cluster Enriched	0.0932749	0	0	0	0.25	0	0.2	0.06	0	0.02	0	0	0	0	0	0	0	0	0	0	0	0	0	0	0	0	0	0	0	0	0	0	0	0	0	0	0	0	0	0	0	0
108912	Cdca2	0.05	0	0	Inf	1	Cluster Enriched	0.000171479	0.06	0.17	0.1	0.05	0.04	0.12	0.05	0	0.17	0	0.02	0.04	0	0	0	0	0	0	0	0	0	0	0	0	0	0	0	0	0	0	0	0	0	0	0	0	0	0	0	0	0
14793	Cdca3	0.01	0	0	Inf	1	Cluster Enriched	0.291288	0	0	0	0	0.03	0.14	0	0	0	0	0	0	0	0	0	0	0	0	0	0	0	0	0	0	0	0	0	0	0	0	0	0	0	0	0	0	0	0	0	0	0
67849	Cdca5	0.01	0	0	Inf	1	Cluster Enriched	0.195988	0	0	0	0.04	0.07	0	0	0	0	0	0	0	0	0	0	0	0	0	0	0	0	0	0	0	0	0	0	0	0	0	0	0	0	0	0	0	0	0	0	0	0
52276	Cdca8	0.6	0.01	0	60	1	Cluster Enriched	1.93e-08	1.02	1.18	1.27	1.24	0.42	0.31	0.41	0.44	0.1	0.11	0.55	0.55	0.51	0.72	0.18	0	0	0	0.03	0.03	0.03	0	0	0	0	0	0	0	0	0	0	0	0	0	0	0	0	0	0	0	0
12534	Cdk1	3.93	1.32	0.22	2.97727	1	Cluster Enriched	3.64e-12	4.42	5.27	7.76	3.6	4.49	4.93	3.84	3.02	4.42	2.26	2.77	3.03	4.34	2.53	2.21	3.06	1.57	1.07	1.89	0.89	1.4	1.56	0.39	0.89	0.64	1.1	1.35	0.82	1.17	0.78	0.26	0.42	0.47	0	0	0	0	0	0	0	0
69562	Cdk13	0.02	0	0	Inf	1	Cluster Enriched	0.00142561	0.01	0.01	0	0.02	0.02	0.03	0.02	0.09	0.04	0.03	0.01	0.02	0	0	0	0	0.03	0.01	0	0	0	0	0	0	0	0	0	0	0	0	0	0	0	0	0	0	0	0	0	0	0
12567	Cdk4	0.28	0.02	0	14	1	Cluster Enriched	0.000550818	0.47	0.26	1.23	0.24	0.47	0.6	0.22	0.16	0.15	0.1	0.08	0	0.07	0.11	0	0.12	0.12	0	0	0	0	0	0	0	0	0	0	0	0	0	0	0	0	0	0	0	0	0	0	0	0
12607	Cebpz	0.11	0.04	0	2.75	1	Cluster Enriched	3e-08	0.15	0.13	0.1	0.19	0.18	0.17	0.21	0.04	0.06	0.05	0.08	0.09	0.07	0.07	0.03	0.06	0.02	0.01	0.02	0.04	0	0	0.06	0.02	0.06	0.11	0.04	0.02	0.02	0	0	0	0	0	0	0	0	0	0	0	0
229841	Cenpe	0.03	0	0	Inf	1	Cluster Enriched	0.00611008	0.17	0.02	0.02	0.07	0.03	0.04	0.04	0.01	0.02	0	0	0	0.01	0.03	0	0	0.02	0.02	0	0	0	0	0	0	0	0	0	0	0	0	0	0	0	0	0	0	0	0	0	0	0
108000	Cenpf	0.01	0	0	Inf	1	Cluster Enriched	0.000469849	0.02	0.01	0.04	0.01	0.02	0.04	0.03	0	0.02	0	0	0	0	0	0	0	0	0	0	0	0	0	0	0	0	0	0	0	0	0	0	0	0	0	0	0	0	0	0	0	0
26886	Cenph	0.16	0	0	Inf	1	Cluster Enriched	0.000466681	0.09	0.09	0.69	0.25	0.26	0.4	0.13	0.16	0.21	0.04	0	0.08	0	0	0	0	0	0	0	0	0	0	0	0	0	0	0	0	0	0	0	0	0	0	0	0	0	0	0	0	0
60411	Cenpk	0.74	0	0	Inf	1	Cluster Enriched	0.129627	0.04	0.12	5.68	0	4.51	0.14	0	0	0	0.16	0.11	0.04	0.19	0.05	0	0	0	0	0	0	0	0	0	0	0	0	0	0	0	0	0	0	0	0	0	0	0	0	0	0	0
110749	Chaf1b	0.26	0.04	0	6.5	1	Cluster Enriched	3.07e-09	0.36	0.22	0.71	0.27	0.31	0.36	0.18	0.27	0.21	0.16	0.12	0.29	0.25	0.14	0.07	0.06	0.11	0.09	0.03	0.01	0	0	0.07	0.01	0	0.03	0.02	0	0	0	0	0	0	0	0	0	0	0	0	0	0
12649	Chek1	0.21	0	0	Inf	1	Cluster Enriched	1.72e-08	0.29	0.42	0.31	0.18	0.26	0.51	0.1	0.12	0.17	0.08	0.1	0.36	0.19	0.12	0	0.03	0.02	0	0	0	0	0	0	0	0	0	0	0	0	0	0	0	0	0	0	0	0	0	0	0	0
214901	Chtf18	0.06	0	0	Inf	1	Cluster Enriched	1.67e-06	0.06	0.02	0.08	0.2	0.1	0.05	0.07	0.03	0.02	0.02	0.13	0.04	0.11	0.02	0.01	0	0	0	0	0	0	0	0	0	0	0	0	0	0	0	0	0	0	0	0	0	0	0	0	0	0
66197	Cks2	1.65	0	0	Inf	1	Cluster Enriched	1.59e-09	2.63	2.14	4.16	1.38	2.15	2.59	0	0.97	1.5	1.03	1.04	1.87	1.51	0.82	0.98	0	0	0	0	0	0	0	0	0	0	0	0	0	0	0	0	0	0	0	0	0	0	0	0	0	0
98985	Clp1	0.03	0	0	Inf	1	Cluster Enriched	0.00981659	0	0.08	0.13	0	0	0	0	0	0	0.06	0.08	0.06	0	0	0	0	0	0	0	0	0	0	0	0	0	0	0	0	0	0	0	0	0	0	0	0	0	0	0	0	0
269582	Clspn	0.02	0	0	Inf	1	Cluster Enriched	0.0095432	0.01	0.01	0.06	0.04	0.03	0.06	0.02	0	0.14	0	0	0	0	0	0	0	0	0	0	0	0	0	0	0	0	0	0	0	0	0	0	0	0	0	0	0	0	0	0	0	0
12903	Crabp1	0.07	0	0	Inf	1	Cluster Enriched	0.126686	0.17	0	0.6	0	0.11	0.1	0	0	0	0	0	0	0	0	0	0	0	0	0	0	0	0	0	0	0	0	0	0	0	0	0	0	0	0	0	0	0	0	0	0	0
54394	Crlf3	0.83	0.39	0.13	2.12821	1	Cluster Enriched	1.09e-09	0.88	0.53	1.68	0.83	0.82	1	0.95	0.85	0.85	0.72	0.77	0.98	0.49	0.5	0.64	0.19	0.5	0.55	0.56	0.27	0.67	0.31	0.46	0.2	0.18	0.57	0.22	0	0.4	0.3	0.23	0.58	0.09	0.33	0.1	0	0	0	0	0	0.19
66515	Cul7	0.04	0.01	0	4	1	Cluster Enriched	0.00372074	0.22	0.06	0.03	0.03	0.04	0.06	0.04	0.02	0.02	0.02	0.03	0.02	0.04	0.02	0.02	0.02	0.03	0.03	0	0	0	0	0	0	0	0.01	0.01	0.01	0.07	0	0	0	0	0	0	0	0	0	0	0	0
13178	Dck	0.98	0.1	0	9.8	1	Cluster Enriched	9.66e-06	0.54	1.18	2.17	0.34	0.81	0.21	1.02	0.14	0.43	3.24	0.92	1.01	1.4	1.1	0.16	0.79	0.14	0	0	0.23	0.05	0	0	0	0	0	0	0	0	0	0	0	0	0	0	0	0	0	0	0	0
66942	Ddx18	0.28	0.09	0.02	3.11111	1	Cluster Enriched	7.73e-05	0.13	0.63	0.18	0.79	0.35	0.39	0.35	0.06	0.1	0.12	0.29	0.15	0.12	0.41	0.06	0.1	0.08	0.11	0.08	0.06	0.14	0	0.09	0.09	0	0.17	0.11	0.36	0.08	0	0	0	0	0	0	0	0	0	0	0	0
218977	Dlgap5	0.15	0	0	Inf	1	Cluster Enriched	0.211535	0.07	0.1	0.1	1.7	0.07	0.06	0.06	0.02	0	0.02	0.01	0	0.04	0.03	0	0	0	0	0	0	0	0	0	0	0	0	0	0	0	0	0	0	0	0	0	0	0	0	0	0	0
13386	Dlk1	1.67	0.24	0	6.95833	1	Cluster Enriched	2.54e-09	1.88	4.58	1.6	1.22	1.43	2.18	1.31	1.44	1.2	0.63	1.46	2.17	0.85	1.99	1.06	1.12	0.66	0.28	0.33	0.25	0.22	0	0	0	0	0	0	0	0	0	0	0	0	0	0	0	0	0	0	0	0
108671	Dnajc9	1.86	0.65	0.15	2.86154	1	Cluster Enriched	2.79e-11	2.58	2.51	3.44	2.54	1.59	1.92	1.62	1.49	1.6	1.79	1.39	1.13	2.14	1.49	0.71	1.44	0.85	0.83	0.86	1.03	0.34	0.45	0.4	0.37	0.08	0.73	0.44	0.76	0.41	0.31	0.12	0.53	0.56	0	0	0	0	0.03	0.03	0	0
13433	Dnmt1	1.25	0.56	0.11	2.23214	1	Cluster Enriched	3.65e-10	1.21	1.52	1.8	2.35	1.24	1.46	2.16	0.95	0.68	0.77	1.15	1.13	0.95	0.92	0.49	1.01	0.54	0.66	0.69	0.51	0.68	0.25	0.25	0.51	0.49	0.73	0.4	0.25	0.35	0.55	0.14	0.09	0.22	0.02	0.08	0.26	0.01	0.01	0.02	0	0
210293	Dock10	0.01	0	0	Inf	1	Cluster Enriched	0.793977	0	0	0	0	0	0	0	0	0	0.01	0.12	0	0	0	0	0	0	0	0	0	0	0	0	0	0.02	0.01	0.01	0	0	0	0.07	0	0.01	0	0	0	0	0	0	0	0
72107	Dscc1	0.02	0	0	Inf	1	Cluster Enriched	0.00521048	0	0.04	0.03	0.01	0.08	0.07	0	0	0	0	0.01	0.04	0	0	0	0	0	0	0	0	0	0	0	0	0	0	0	0	0	0	0	0	0	0	0	0	0	0	0	0	0
66934	Dsn1	0.07	0	0	Inf	1	Cluster Enriched	0.0232626	0	0	0	0.15	0.12	0.42	0.03	0.08	0.23	0	0	0	0	0	0	0	0	0	0	0	0	0	0	0	0	0	0	0	0	0	0	0	0	0	0	0	0	0	0	0	0
76843	Dtl	0.02	0	0	Inf	1	Cluster Enriched	0.2105	0.01	0.01	0.19	0	0.04	0.01	0	0	0	0	0	0	0	0	0	0	0	0	0	0	0	0	0	0	0	0	0	0	0	0	0	0	0	0	0	0	0	0	0	0	0
110074	Dut	8.66	2.64	0.59	3.2803	1	Cluster Enriched	1.65e-07	8.69	7.64	24.22	13.93	11.96	7.96	7.77	9.29	9.98	5.23	6.54	3.65	6.07	4.9	2	3.32	4.66	1.68	4.76	3.31	1.25	2.19	2.65	0.89	2.43	3.32	1.18	2.15	2	1.03	2.71	0.36	0.44	1.28	0	0.06	0	0	0	0	0
13548	Dyrk1a	0.02	0	0	Inf	1	Cluster Enriched	2.84e-05	0.01	0.02	0.05	0.01	0.04	0.02	0	0	0	0.01	0.01	0.01	0.03	0.03	0	0	0	0	0	0	0	0	0	0	0	0	0	0	0	0	0	0	0	0	0	0	0	0	0	0	0
13605	Ect2	0.02	0	0	Inf	1	Cluster Enriched	0.00235192	0.01	0	0.08	0.05	0.03	0.01	0.05	0.01	0.05	0	0	0	0	0	0	0	0	0	0	0	0	0	0	0	0	0	0	0	0	0	0	0	0	0	0	0	0	0	0	0	0
236930	Ercc6l	0.17	0.02	0	8.5	1	Cluster Enriched	1.9e-09	0.18	0.21	0.46	0.19	0.29	0.18	0.16	0.12	0.14	0.11	0.16	0.1	0.19	0.1	0.02	0.05	0.03	0.06	0	0	0	0	0	0	0	0.04	0.01	0	0	0	0	0	0	0	0	0	0	0	0	0	0
67276	Eri1	0.11	0	0	Inf	1	Cluster Enriched	0.000489713	0.15	0.08	0.08	0.36	0.19	0.18	0.39	0	0.05	0	0	0	0.06	0.07	0	0	0	0	0	0	0	0	0	0	0	0	0	0	0	0	0	0	0	0	0	0	0	0	0	0	0
27028	Ermap	0.06	0	0	Inf	1	Cluster Enriched	2.94e-05	0	0	0	0.18	0.13	0.03	0.16	0.06	0.05	0.03	0.06	0.06	0.04	0.12	0	0	0	0	0	0	0	0	0	0	0	0	0	0	0	0	0	0	0	0	0	0	0	0	0	0	0
66583	Exosc1	0.27	0.09	0.05	3	1	Cluster Enriched	6.81e-05	0.28	0.39	0.59	0.28	0.4	0.41	0.26	0.27	0.24	0.13	0.16	0.32	0.17	0.13	0.05	0.25	0.2	0	0	0	0	0	0	0	0	0.41	0.27	0	0.15	0.11	0.2	0.25	0.19	0	0	0	0	0	0	0	0
14056	Ezh2	0.17	0.04	0	4.25	1	Cluster Enriched	6.35e-07	0.09	0.06	0.27	0.1	0.16	0.18	0.23	0.29	0.28	0.03	0.18	0.21	0.22	0.21	0.02	0.08	0.16	0.3	0	0	0	0	0	0	0	0	0	0	0	0	0	0	0	0	0	0	0	0	0	0	0
208836	Fanci	0.05	0	0	Inf	1	Cluster Enriched	2.9e-09	0.02	0.04	0.05	0.11	0.07	0.03	0.06	0.11	0.03	0.05	0.04	0.03	0.05	0.05	0	0.01	0.01	0	0	0	0	0	0	0	0	0	0	0	0	0	0	0	0	0	0	0	0	0	0	0	0
67141	Fbxo5	0.01	0	0	Inf	1	Cluster Enriched	0.0340409	0	0.02	0.03	0.02	0.01	0	0	0	0	0	0	0	0	0	0	0	0	0	0	0	0	0	0	0	0	0	0	0	0	0	0	0	0	0	0	0	0	0	0	0	0
14156	Fen1	3.26	1.46	0.33	2.23288	1	Cluster Enriched	1.61e-13	4.32	2.65	4.75	3.19	3.36	2.31	3.17	4.3	3.87	2.58	4.08	2.85	2.73	2.57	2.13	1.99	3	1.21	0.89	0.97	2.13	1.12	1.27	0.85	1.68	1.76	0.66	1.03	1.18	0.94	0.3	1	0.61	0.39	0.31	0.26	0	0	0	0	0
60530	Fignl1	0.04	0	0	Inf	1	Cluster Enriched	2.37e-12	0.04	0.04	0.05	0.07	0.04	0.06	0.03	0.03	0.03	0.01	0	0.04	0.04	0.04	0.03	0	0	0	0	0	0	0	0	0	0	0	0	0	0	0	0	0	0	0	0	0	0	0	0	0	0
14391	Gabpb1	0.05	0	0	Inf	1	Cluster Enriched	0.00895993	0.15	0.21	0	0.03	0	0.13	0	0	0	0	0	0	0.18	0.04	0	0	0	0	0	0	0	0	0	0	0	0	0	0	0	0	0	0	0	0	0	0	0	0	0	0	0
68147	Gar1	1.03	0.4	0.33	2.575	1	Cluster Enriched	0.00275358	2.43	1.96	0.69	2.27	1.92	1.26	0.84	0.7	0.81	0	0.51	0.42	0.23	1.48	0	0.25	0	0.84	0	0.33	0.37	0.56	0.85	0.54	0	0.35	0.67	1.02	0.72	0	0	0.64	0.68	0.31	0.43	0.19	0	0	0	0	0
216766	Gemin5	0.31	0.14	0.05	2.21429	1	Cluster Enriched	1.65e-05	0.5	0.28	0.78	0.55	0.4	0.46	0.24	0.18	0.2	0.2	0.16	0.25	0.2	0.13	0.15	0.14	0.11	0.16	0.05	0.08	0.07	0.09	0.49	0.09	0.07	0.23	0.14	0.02	0.01	0.08	0.08	0.01	0.06	0.01	0.09	0	0	0.15	0.03	0.22	0
14582	Gfi1b	0.01	0	0	Inf	1	Cluster Enriched	0.0970282	0	0	0	0.06	0.05	0.02	0	0	0	0	0	0	0	0	0	0	0	0	0	0	0	0	0	0	0	0	0	0	0	0	0	0	0	0	0	0	0	0	0	0	0
69270	Gins1	0.1	0	0	Inf	1	Cluster Enriched	6.69e-10	0.13	0.18	0.18	0.06	0.11	0.15	0.1	0.06	0.05	0.13	0.06	0.21	0.05	0.07	0	0	0	0	0	0	0	0	0	0	0	0	0	0	0	0	0	0	0	0	0	0	0	0	0	0	0
272551	Gins2	0.2	0.02	0	10	1	Cluster Enriched	3e-08	0.3	0.34	0.45	0.15	0.32	0.11	0.18	0	0.2	0.14	0.17	0.16	0.35	0.13	0	0.11	0.06	0.04	0	0	0	0	0	0	0	0	0	0	0	0	0	0	0	0	0	0	0	0	0	0	0
78833	Gins3	0.31	0	0	Inf	1	Cluster Enriched	0.000367415	0.06	0.29	1.13	0.74	0.12	0.73	0.14	0.41	0.78	0	0.02	0.18	0.07	0.03	0	0	0	0	0	0	0	0	0	0	0	0	0	0	0	0	0	0	0	0	0	0	0	0	0	0	0
30877	Gnl3	0.64	0.28	0.1	2.28571	1	Cluster Enriched	6.64e-08	1.22	0.93	0.56	0.76	0.9	0.97	0.53	0.47	0.61	0.21	0.38	0.41	0.55	0.43	0.63	0.28	0.16	0.35	0.17	0.19	0.12	0.18	0.41	0.6	0.42	0.41	0.11	0.07	0.12	0.14	0.08	0.08	0.11	0.03	0	0.68	0.19	0	0.01	0.01	0.17
68705	Gtf2f2	0.65	0.28	0.13	2.32143	1	Cluster Enriched	2.1e-06	0.84	0.54	1	1.11	0.59	1.17	0.76	0.3	0.59	0.49	0.52	0.69	0.62	0.44	0.08	0.37	0.31	0.25	0.18	0.24	0.28	0.12	0.28	0.12	0.3	0.72	0.16	0.05	0.5	0.19	0.15	0.74	0.09	0	0	0	0	0	0	0.41	0
231123	Haus3	0.12	0	0	Inf	1	Cluster Enriched	0.000470652	0.15	0.06	0.45	0.06	0.25	0.21	0.32	0.04	0.01	0.02	0.15	0.03	0	0	0	0	0	0	0	0	0	0	0	0	0	0	0	0	0	0	0	0	0	0	0	0	0	0	0	0	0
71909	Haus5	0.1	0	0	Inf	1	Cluster Enriched	0.00128497	0.04	0	0.05	0.52	0.11	0.05	0.26	0.06	0.1	0.06	0.08	0.07	0.11	0	0.03	0	0	0	0	0	0	0	0	0	0	0	0	0	0	0	0	0	0	0	0	0	0	0	0	0	0
230376	Haus6	0.03	0	0	Inf	1	Cluster Enriched	2.55e-05	0.02	0.04	0.07	0.02	0.01	0.09	0.02	0	0.03	0	0.03	0.02	0.02	0.02	0	0	0	0	0	0	0	0	0	0	0	0	0	0	0	0	0	0	0	0	0	0	0	0	0	0	0
217995	Heatr1	0.18	0.08	0.03	2.25	1	Cluster Enriched	6.82e-08	0.21	0.21	0.38	0.21	0.22	0.27	0.18	0.1	0.11	0.09	0.13	0.15	0.16	0.16	0.08	0.13	0.11	0.08	0.03	0.08	0.03	0.01	0.06	0.06	0.17	0.09	0.13	0.1	0.06	0.04	0.01	0	0.07	0.09	0.01	0.05	0	0	0	0	0
15201	Hells	0.19	0.02	0	9.5	1	Cluster Enriched	1.35e-06	0.11	0.18	0.65	0.26	0.28	0.22	0.22	0.04	0.08	0.07	0.13	0.18	0.11	0.23	0.09	0.05	0.02	0.04	0	0	0	0	0	0	0	0.1	0.01	0	0	0	0	0	0	0	0	0	0	0	0	0	0
319594	Hif1an	0.05	0	0.02	2.5	1	Cluster Enriched	0.0415317	0.06	0.06	0.12	0.05	0.05	0.08	0.05	0.01	0.05	0.06	0.06	0	0.05	0.05	0	0	0	0	0	0	0	0	0	0	0	0	0	0.29	0	0.02	0	0	0	0	0	0	0	0	0	0	0
15366	Hmmr	0.28	0.02	0	14	1	Cluster Enriched	1.52e-05	0.29	0.35	0.35	0.23	0.27	0.2	0.17	0.26	0.09	0.04	0.33	0.25	1.13	0.26	0.02	0.05	0.09	0.06	0	0	0	0	0	0	0	0	0	0	0	0	0	0	0	0	0	0	0	0	0	0	0
209268	Igsf1	0.09	0.02	0	4.5	1	Cluster Enriched	3.21e-07	0.05	0.09	0.07	0.05	0.06	0.1	0.2	0.08	0.05	0.07	0.19	0.1	0.05	0.09	0.14	0.03	0.08	0.16	0	0	0	0	0	0	0	0	0	0	0	0	0	0	0	0	0	0	0	0	0	0	0
22778	Ikzf1	0.21	0.01	0	21	1	Cluster Enriched	4.55e-08	0.29	0.07	0.55	0.26	0.15	0.1	0.07	0.26	0.12	0.18	0.14	0.38	0.12	0.36	0.08	0.02	0.1	0.03	0	0	0	0	0	0	0	0	0	0	0	0	0	0	0	0	0	0	0	0	0	0	0
16319	Incenp	0.17	0.02	0	8.5	1	Cluster Enriched	5e-08	0.22	0.18	0.27	0.32	0.19	0.03	0.17	0.2	0.14	0.15	0.07	0.03	0.33	0.31	0	0.13	0.13	0	0	0	0	0	0	0	0	0	0	0	0	0	0	0	0	0	0	0	0	0	0	0	0
66262	Ing5	0.01	0	0	Inf	1	Cluster Enriched	0.0105592	0	0	0	0.02	0.02	0.02	0.02	0.04	0	0	0	0	0	0	0	0	0	0	0	0	0	0	0	0	0	0	0	0	0	0	0	0	0	0	0	0	0	0	0	0	0
404710	Iqgap3	0.01	0	0	Inf	1	Cluster Enriched	0.156299	0	0	0	0.01	0.01	0.02	0.01	0.01	0.01	0	0.01	0.01	0.01	0.02	0.02	0	0	0	0	0	0	0	0	0	0	0	0	0	0	0	0	0	0	0.01	0.07	0	0	0	0	0	0
229504	Isg20l2	0.02	0	0	Inf	1	Cluster Enriched	0.0441913	0	0.16	0.05	0.09	0	0.07	0	0	0	0	0	0	0	0	0	0	0	0	0	0	0	0	0	0	0	0	0	0	0	0	0	0	0	0	0	0	0	0	0	0	0
16401	Itga4	0.24	0.07	0	3.42857	1	Cluster Enriched	1.17e-10	0.24	0.08	0.37	0.32	0.2	0.22	0.32	0.26	0.41	0.23	0.21	0.13	0.29	0.24	0.07	0.16	0.22	0.17	0	0.11	0.07	0	0.04	0.03	0	0	0	0	0	0	0	0	0	0	0	0	0	0	0	0	0
16534	Kcnn4	0.01	0	0	Inf	1	Cluster Enriched	0.0354557	0	0	0	0	0.02	0.03	0.03	0	0.01	0	0	0	0	0	0	0	0	0	0	0	0	0	0	0	0	0	0	0	0	0	0	0	0	0	0	0	0	0	0	0	0
104263	Kdm3a	0.01	0	0	Inf	1	Cluster Enriched	0.288391	0.01	0	0.01	0	0.01	0.15	0	0	0	0	0	0	0	0	0	0	0	0	0	0	0	0	0	0	0	0	0	0	0	0	0	0	0	0	0	0	0	0	0	0	0
23925	Kel	0.12	0.01	0	12	1	Cluster Enriched	8.13e-10	0.04	0.18	0	0.16	0.13	0.09	0.14	0.17	0.27	0.11	0.14	0.1	0.15	0.06	0.05	0.06	0.01	0	0	0	0	0	0	0	0	0	0	0	0	0	0	0	0	0	0	0	0	0	0	0	0
16551	Kif11	0.35	0.05	0	7	1	Cluster Enriched	5.64e-10	0.38	0.38	0.88	0.42	0.43	0.49	0.23	0.24	0.24	0.2	0.15	0.38	0.33	0.44	0.08	0.17	0.1	0.07	0.06	0.04	0.05	0.04	0	0.01	0	0	0	0	0	0	0	0	0	0	0	0	0	0	0	0	0
228421	Kif18a	0.04	0	0	Inf	1	Cluster Enriched	0.00799529	0	0	0	0.1	0.1	0.12	0	0.17	0.09	0	0	0	0	0	0	0	0	0	0	0	0	0	0	0	0	0	0	0	0	0	0	0	0	0	0	0	0	0	0	0	0
19348	Kif20a	0.09	0	0	Inf	1	Cluster Enriched	6.27e-06	0.09	0.04	0.1	0.07	0.29	0.23	0.07	0.08	0.04	0.02	0.04	0.04	0.11	0.12	0	0.02	0.01	0.01	0	0	0	0	0	0	0	0	0	0	0	0	0	0	0	0	0	0	0	0	0	0	0
240641	Kif20b	0.02	0	0	Inf	1	Cluster Enriched	9.06e-05	0.01	0.05	0.01	0.01	0.03	0.03	0.04	0	0.02	0.02	0.01	0	0	0	0	0	0	0	0	0	0	0	0	0	0	0	0	0	0	0	0	0	0	0	0	0	0	0	0	0	0
110033	Kif22	0.23	0	0	Inf	1	Cluster Enriched	1.67e-07	0.14	0.21	0.63	0.2	0.44	0.38	0.18	0.12	0.15	0.37	0.07	0.25	0.1	0.15	0	0.03	0.01	0	0	0	0	0	0	0	0	0	0	0.03	0.01	0	0	0	0	0	0	0	0	0	0	0	0
71819	Kif23	0.07	0	0	Inf	1	Cluster Enriched	7.98e-08	0.2	0.11	0.09	0.06	0.07	0.05	0.1	0.06	0.04	0.01	0.03	0.04	0.1	0.03	0.02	0	0	0	0	0	0	0	0	0	0	0	0	0	0	0	0	0	0	0	0	0	0	0	0	0	0
73804	Kif2c	0.35	0.08	0	4.375	1	Cluster Enriched	0.16028	0.14	0.17	0.33	0.08	0.29	0.19	0.09	0.06	0.14	0.07	0.09	3.29	0.11	0.1	0.06	0.54	0.21	0.06	0.05	0	0.06	0	0	0	0	0	0	0	0	0	0	0	0	0	0	0	0	0	0	0	0
16571	Kif4	0.31	0.08	0	3.875	1	Cluster Enriched	9.98e-11	0.28	0.36	0.43	0.73	0.34	0.25	0.36	0.2	0.17	0.32	0.29	0.23	0.36	0.25	0.13	0.22	0.13	0.15	0.06	0.04	0.07	0.2	0.01	0.02	0.01	0.01	0.04	0	0	0	0	0	0	0	0	0	0	0	0	0	0
16580	Kifc5b	0.09	0	0	Inf	1	Cluster Enriched	2.01e-05	0.07	0	0.26	0.13	0.14	0.22	0.16	0.08	0.07	0.08	0.04	0.07	0	0	0	0	0.05	0.01	0	0	0	0	0	0	0	0	0	0	0	0	0	0	0	0	0	0	0	0	0	0	0
16596	Klf1	0.02	0	0	Inf	1	Cluster Enriched	0.282946	0.3	0	0.07	0	0	0	0	0	0	0	0	0	0	0	0	0	0	0	0	0	0	0	0	0	0	0	0	0	0	0	0	0	0	0	0	0	0	0	0	0	0
208628	Kntc1	0.05	0	0	Inf	1	Cluster Enriched	3.5e-10	0.08	0.03	0.08	0.05	0.07	0.07	0.09	0.05	0.03	0.04	0.03	0.04	0.05	0.01	0.01	0.03	0.01	0.02	0	0	0	0	0	0	0	0	0	0	0	0	0	0	0	0	0	0	0	0	0	0	0
16647	Kpna2	2.26	0.74	0.26	3.05405	1	Cluster Enriched	1.88e-10	3.1	2.32	4.31	2.74	2.98	2.49	1.58	1.96	2.41	1.39	1.65	3.26	1.45	1.36	0.95	1.34	0.64	0.85	0.7	0.65	0.8	0.22	0.75	0.28	1.14	1.26	0.3	0.44	0.88	0.83	0.37	0.9	0.17	0.17	0.1	0.04	0.18	0.1	0.14	0.04	0.01
16852	Lgals1	42.98	20.25	11.34	2.12247	1	Cluster Enriched	8e-08	50.99	44.62	93.31	32.65	48.66	44.42	38.54	28.86	33.35	43.7	25.55	39.79	53.27	35.05	31.87	40.07	23.77	36.53	17.81	13.57	26.07	11.62	10.01	17.21	15.28	15.9	15.16	24.56	11.83	30.66	11.76	21.51	22.59	11.56	16.01	17.66	4.42	5.93	7.25	2.42	1.64
16881	Lig1	1.93	0.52	0.09	3.71154	1	Cluster Enriched	3.33e-14	1.66	1.79	3.09	2.56	2.35	2.61	2.08	2.06	1.88	1.49	1.49	1.61	2.14	1.44	0.64	1.28	0.78	0.82	0.26	0.35	0.7	0.32	0.34	0.21	0.3	0.69	0.25	0.45	0.36	0.27	0.1	0.11	0.12	0.02	0.14	0.02	0	0	0	0	0
16909	Lmo2	0.05	0	0	Inf	1	Cluster Enriched	0.0135761	0.13	0	0.25	0.23	0.1	0.1	0	0	0	0	0	0	0	0	0	0	0	0	0	0	0	0	0	0	0	0	0	0	0	0	0	0	0	0	0	0	0	0	0	0	0
17089	Lyar	0.38	0.04	0	9.5	1	Cluster Enriched	0.00113904	0.83	1.27	1.14	1.1	0.24	0.24	0.33	0	0.06	0.09	0.08	0	0.08	0.25	0	0.08	0	0.13	0.07	0.1	0	0	0	0	0	0.1	0.04	0	0	0	0	0	0	0	0	0	0	0	0	0	0
56150	Mad2l1	0.6	0.22	0.09	2.72727	1	Cluster Enriched	0.00537659	0.37	1.53	1.18	0.67	0.63	0.76	0.58	0.31	0.47	0.45	0.24	0.56	0	1.07	0.13	0.22	0	0.16	1.82	0.15	0.08	0	0	0	0	0.12	0.12	1.17	0	0.1	0.08	0.17	0.16	0	0	0	0	0	0	0	0
66734	Map1lc3a	0.09	0	0	Inf	1	Cluster Enriched	0.177473	0	0	0	0	0.73	0.58	0	0	0	0	0	0	0	0	0	0	0	0	0	0	0	0	0	0	0	0	0	0	0	0	0	0	0	0	0	0	0	0	0	0	0
26411	Map4k1	0.02	0	0	Inf	1	Cluster Enriched	0.375777	0	0	0	0	0.34	0.02	0	0	0	0	0	0	0	0	0	0	0	0	0	0	0	0	0	0	0	0	0	0	0	0	0	0	0	0	0	0	0	0	0	0	0
17187	Max	0.07	0	0	Inf	1	Cluster Enriched	0.100755	0	0	0	0	0.2	0.15	0	0.61	0.11	0	0	0	0	0	0	0	0	0	0	0	0	0	0	0	0	0	0	0	0	0	0	0	0	0	0	0	0	0	0	0	0
17216	Mcm2	6.09	2.29	0.79	2.65939	1	Cluster Enriched	1.84e-14	6.37	5.83	9.21	7.01	7.07	8.1	6.57	6.6	6.76	4.36	4.82	4.79	5.61	4.81	3.41	3.62	3.6	2.18	1.86	3.13	1.83	1.22	2.37	1.66	1.62	2.87	1.56	1.74	2.26	1.79	1.39	2.13	1.09	0.58	0.81	0.41	0.08	0.8	1.13	0	0
17215	Mcm3	4.95	2.39	1.04	2.07113	1	Cluster Enriched	4.98e-12	6.36	6.3	7.36	4.77	5.55	6.24	5.62	3.97	4.55	4.38	3.97	3.84	4.51	3.58	3.29	3.4	2.96	2.33	2.45	1.66	2.41	1.99	3.06	1.48	2.82	2.9	1.23	2.8	2.42	1.84	1.76	1.36	1.83	0.83	2.37	1.05	0.5	1.27	0.64	0	0
17217	Mcm4	4.1	1.97	0.76	2.08122	1	Cluster Enriched	1.51e-08	4.52	3.62	7.86	3.96	5.55	5.37	4.03	4.25	4.5	3.39	2.65	3.88	3.37	2.47	2.11	2.77	2.2	4.59	1.54	1.49	2.95	1.38	1.29	1.36	1.29	1.61	1.12	2.98	2.1	2.59	0.74	0.82	2.3	0.38	0.45	0.6	0.31	0.26	0.23	0	0
17219	Mcm6	5.94	2.85	1.38	2.08421	1	Cluster Enriched	7.92e-08	6.9	6.12	9.01	4.78	8.33	7.25	5.37	5.39	5.16	4.69	3.25	6.8	7.67	4.44	3.99	3.38	2.29	4.8	1.61	1.8	2.48	3.53	1.77	1.5	2.44	6.89	1.75	1.61	7.19	2.54	1.71	2.49	2.52	3.15	0.58	1.86	0.27	0.67	0.21	0	0
17220	Mcm7	5.66	2.43	0.68	2.32922	1	Cluster Enriched	1.06e-11	5.75	5.61	10.89	6.03	6.75	7.57	6.47	4.92	6.13	3.46	3.55	6.51	4.1	3.58	3.65	3.05	2.79	4.06	2.74	2.6	2.66	1.54	1.95	1.1	2.68	2.53	1.45	1.52	1.97	1.86	0.99	1.91	1.24	0.82	0.55	0.62	0.11	0.4	0.33	0	0
240087	Mdc1	0.16	0.05	0	3.2	1	Cluster Enriched	2.39e-06	0.2	0.33	0.11	0.3	0.13	0.17	0.37	0.14	0.06	0.09	0.11	0.04	0.05	0.31	0.06	0.09	0.08	0.02	0.01	0.02	0	0	0.07	0.13	0.01	0.16	0	0.08	0.01	0	0	0	0	0	0	0	0	0	0	0	0
100019	Mdn1	0.03	0.01	0	3	1	Cluster Enriched	8.74e-07	0.03	0.06	0.09	0.04	0.05	0.05	0.03	0.01	0.05	0.01	0.03	0.02	0.02	0.01	0	0.02	0.01	0	0	0.01	0.01	0	0.01	0.01	0.02	0	0.01	0	0	0	0	0	0	0	0	0	0	0	0	0	0
69792	Med6	0.01	0	0	Inf	1	Cluster Enriched	0.102152	0	0	0	0.04	0.06	0.11	0	0	0	0	0	0	0	0	0	0	0	0	0	0	0	0	0	0	0	0	0	0	0	0	0	0	0	0	0	0	0	0	0	0	0
171580	Mical1	0.01	0	0	Inf	1	Cluster Enriched	0.0261095	0.07	0.01	0.05	0.07	0.02	0	0	0	0	0	0	0	0	0	0	0	0	0	0	0	0	0	0	0	0	0	0	0	0	0	0	0	0	0	0	0	0	0	0	0	0
17345	Mki67	1	0.41	0.07	2.43902	1	Cluster Enriched	5.25e-05	2	2.98	1.31	1.59	0.37	0.28	1.1	0.22	0.22	0.74	0.57	0.41	1.31	1.64	0.28	0.82	0.61	0.35	0.33	0.57	0.25	0.52	0.73	0.13	0.15	0.33	0.15	0.64	0.33	0.06	0.04	0.13	0.01	0	0	0	0	0	0	0	0
17535	Mre11a	0.14	0.06	0.01	2.33333	1	Cluster Enriched	6.42e-08	0.24	0.11	0.18	0.14	0.2	0.14	0.26	0.17	0.12	0.08	0.07	0.1	0.12	0.1	0.05	0.07	0.06	0.12	0	0.04	0.04	0.03	0.11	0.02	0.12	0.04	0.04	0	0	0	0.14	0	0.05	0.04	0	0.02	0	0	0	0	0
17688	Msh6	0.39	0.16	0.06	2.4375	1	Cluster Enriched	6.02e-09	0.37	0.45	0.73	0.61	0.6	0.62	0.38	0.26	0.29	0.21	0.22	0.33	0.26	0.29	0.18	0.2	0.21	0.12	0.14	0.23	0.16	0.13	0.25	0.11	0.17	0.13	0.11	0.06	0.07	0.06	0.17	0.12	0.21	0.1	0.05	0.08	0.03	0.03	0.03	0	0
17765	Mtf2	0.04	0	0	Inf	1	Cluster Enriched	0.0177526	0.03	0.18	0.09	0.16	0.19	0	0	0	0	0	0	0	0	0	0	0	0	0	0	0	0	0	0	0	0	0	0	0	0	0	0	0	0	0	0	0	0	0	0	0	0
213435	Mylk3	0.05	0	0	Inf	1	Cluster Enriched	0.000700905	0	0	0	0.03	0.12	0.02	0.09	0.11	0.03	0	0.03	0.08	0.04	0.02	0.24	0	0	0	0	0	0	0	0	0	0	0	0	0	0	0	0	0	0	0	0	0	0	0	0	0	0
50927	Nasp	4.3	1.92	0.75	2.23958	1	Cluster Enriched	2.24e-06	4.83	3.99	12.33	4.02	5.51	6.12	3.33	3.93	4.98	2.52	1.7	3.17	2.95	2.32	2.74	1.68	1.85	4.05	1.81	1.33	2.2	1.69	1.65	1.45	1.39	2.45	1.51	1.56	0.77	1.63	1.1	1.68	1.55	0.82	0.63	1.45	0.47	0.64	0.67	0.05	0.12
68298	Ncapd2	0.67	0.23	0.03	2.91304	1	Cluster Enriched	1.31e-14	0.58	0.52	1.05	0.94	0.79	0.66	0.55	0.76	0.73	0.47	0.59	0.6	0.67	0.76	0.32	0.41	0.39	0.5	0.25	0.16	0.26	0.14	0.14	0.12	0.13	0.14	0.13	0.18	0.11	0.05	0.08	0	0.07	0	0	0	0	0	0	0	0
54392	Ncapg	0.54	0.2	0.02	2.7	1	Cluster Enriched	3.88e-16	0.46	0.7	0.78	0.43	0.45	0.51	0.65	0.57	0.49	0.45	0.57	0.53	0.64	0.55	0.34	0.39	0.38	0.23	0.17	0.21	0.16	0.18	0.24	0.2	0.1	0.12	0.04	0.17	0.15	0.03	0.03	0.02	0	0	0	0	0	0	0	0	0
76044	Ncapg2	0.08	0.02	0	4	1	Cluster Enriched	1.63e-10	0.11	0.04	0.18	0.05	0.09	0.1	0.12	0.07	0.08	0.08	0.07	0.06	0.09	0.06	0.03	0.07	0.06	0.02	0.02	0	0.01	0.02	0.02	0.02	0.02	0.03	0	0	0	0	0	0	0	0	0	0	0	0	0	0	0
215387	Ncaph	1.56	0.24	0	6.5	1	Cluster Enriched	0.00402439	2.8	0.67	1.31	0.92	1.05	1.34	0.9	0.76	0.97	0.86	0.54	0.69	1.1	0.64	8.88	0.5	0.41	0.64	0.27	0.22	0.32	0.06	0.11	0.07	0.13	0.06	0.03	0	0	0	0	0	0	0	0	0	0	0	0	0	0
52683	Ncaph2	0.14	0.02	0	7	1	Cluster Enriched	7.52e-07	0.14	0.09	0.17	0.14	0.16	0.45	0.17	0.24	0.09	0.05	0.07	0.11	0.12	0.12	0	0.12	0.06	0	0	0	0	0	0	0	0	0	0	0	0	0	0	0	0	0	0	0	0	0	0	0	0
67052	Ndc80	0.18	0	0	Inf	1	Cluster Enriched	0.210357	0.07	0.04	0.11	0.06	0.09	0.08	0.04	0	2.02	0.02	0.05	0.02	0.05	0.04	0.02	0	0	0	0	0	0	0	0	0	0	0	0	0	0	0	0	0	0	0	0	0	0	0	0	0	0
18074	Nid2	0.37	0.18	0.1	2.05556	1	Cluster Enriched	0.0015887	0.6	0.12	0.42	0.06	0.6	0.3	0.09	0.19	0.88	0.56	0.06	0.34	0.6	0.57	0.12	0.48	0.05	0.09	0.14	0.12	0.02	0.11	0.3	0.34	0.16	0.23	0.15	0.18	0.13	0.05	0.1	0.17	0.32	0.04	0.08	0	0.01	0.01	0.02	0.01	0.07
66164	Nip7	0.45	0.11	0	4.09091	1	Cluster Enriched	0.000861303	0.1	0.43	0.94	1.34	0.45	0.73	1.11	0.11	0.29	0.61	0.27	0.3	0	0	0	0	0	0	0	0	0	0.04	1.1	0.21	0	0	0	0	0	0	0	0	0	0	0	0	0	0	0	0	0
97112	Nmd3	0.12	0.05	0.02	2.4	1	Cluster Enriched	3.7e-05	0.07	0.1	0.27	0.15	0.17	0.21	0.14	0	0.14	0.1	0.12	0.11	0.13	0.12	0.03	0	0	0	0	0	0	0	0.14	0.05	0.16	0.09	0.2	0.07	0.06	0.05	0	0	0	0	0	0	0	0	0	0	0
100608	Noc4l	0.14	0.01	0	14	1	Cluster Enriched	3.81e-05	0.14	0.16	0.55	0.1	0.25	0.13	0.12	0.08	0.03	0.12	0.05	0.06	0.1	0.2	0	0.11	0.02	0	0	0	0	0	0	0	0	0	0	0	0	0	0	0	0	0	0	0	0	0	0	0	0
68979	Nol11	0.15	0.05	0.01	3	1	Cluster Enriched	9.15e-08	0.22	0.24	0.3	0.28	0.2	0.17	0.17	0.11	0.1	0.04	0.05	0.14	0.1	0.09	0.09	0.07	0.08	0.1	0	0	0	0	0.04	0.06	0.13	0.1	0.04	0.03	0.08	0	0	0.02	0.04	0	0	0	0.02	0	0.02	0	0
75416	Nop14	0.23	0.08	0.01	2.875	1	Cluster Enriched	3e-06	0.05	0.14	0.13	0.34	0.34	0.63	0.27	0.12	0.16	0.06	0.38	0.07	0.34	0.35	0.13	0.05	0.03	0.04	0.2	0.02	0.06	0	0.03	0.1	0.12	0.2	0.09	0.01	0.03	0	0.08	0	0.07	0	0	0	0	0	0	0	0
18148	Npm1	37.41	16.12	4.25	2.32072	1	Cluster Enriched	1.84e-06	59.48	0	91.42	59.15	57.41	62.74	45.32	24.69	29.28	26.92	23.79	23.77	17.26	24.22	15.67	12.45	19.33	15.77	6.68	11.63	16.04	14.84	19.96	21.3	19.32	23.23	12.9	7.83	9.43	11.35	0	11.37	10.88	7.21	0	9.73	0	0	0	0	0
18181	Nrf1	0.3	0.08	0.02	3.75	1	Cluster Enriched	3.98e-07	0.64	0.38	0.37	0.49	0.39	0.26	0	0.28	0.26	0	0.16	0.28	0.42	0.23	0.27	0	0	0	0	0	0	0	0.21	0.14	0.2	0.19	0.17	0	0	0	0.2	0.15	0	0	0	0	0	0	0	0	0
381318	Nsl1	0.05	0	0	Inf	1	Cluster Enriched	0.00112712	0.04	0	0.07	0	0.19	0.06	0.06	0.03	0.15	0	0.03	0.05	0	0	0	0	0	0	0	0	0	0	0	0	0	0	0	0	0	0	0	0	0	0	0	0	0	0	0	0	0
68501	Nsmce2	0.05	0	0	Inf	1	Cluster Enriched	2.02e-05	0.1	0	0.12	0.11	0.08	0	0.02	0.05	0	0	0.07	0.05	0	0.07	0.04	0	0.02	0.02	0	0	0	0	0	0	0	0	0	0	0	0	0	0	0	0	0	0	0	0	0	0	0
66977	Nuf2	0.03	0	0	Inf	1	Cluster Enriched	6.9e-05	0.1	0.02	0.1	0.02	0.06	0.05	0	0	0	0	0.06	0.05	0.02	0.03	0	0	0	0	0	0	0	0	0	0	0	0	0	0	0	0	0	0	0	0	0	0	0	0	0	0	0
103468	Nup107	0.3	0.11	0.04	2.72727	1	Cluster Enriched	1.3e-07	0.36	0.26	0.74	0.37	0.36	0.4	0.26	0.23	0.3	0.11	0.24	0.46	0.09	0.18	0.15	0.08	0.09	0.15	0.04	0.07	0.08	0.03	0.17	0.17	0.11	0.14	0.16	0.08	0.07	0.12	0.07	0.05	0.09	0.03	0.1	0.04	0.01	0.04	0.03	0.01	0
69912	Nup43	0.52	0.2	0	2.6	1	Cluster Enriched	5.43e-06	0.69	0.28	1.51	0.25	0.72	0.75	0.08	0.16	0.16	0.42	0.56	0.71	0.76	0.27	0.43	0.31	0	0.66	0.07	0.48	0.41	0.04	0	0.14	0	0.19	0.15	0	0	0	0	0	0	0	0	0	0	0	0	0	0
71844	Nupl1	0.31	0.13	0	2.38462	1	Cluster Enriched	3.22e-05	0.47	0.3	1.17	0.24	0.31	0.3	0.2	0.2	0.21	0.17	0.17	0.44	0.21	0.16	0.16	0.28	0	0.28	0.11	0.29	0.18	0.05	0.11	0	0	0.16	0.1	0	0	0	0	0	0	0	0	0	0	0	0	0	0
108907	Nusap1	0.47	0.04	0	11.75	1	Cluster Enriched	5.46e-07	0.46	1	0.36	0.31	1	0.36	0.64	0	0.27	0.33	0.17	0.61	1.06	0.48	0	0.09	0.42	0	0	0	0	0	0	0	0	0	0	0	0	0	0	0	0	0	0	0	0	0	0	0	0
18230	Nxn	0.01	0	0	Inf	1	Cluster Enriched	0.0210901	0	0.01	0.06	0	0.03	0.05	0	0	0	0	0.01	0.01	0	0	0	0	0	0	0	0	0	0	0	0	0	0	0	0	0	0	0	0	0	0	0	0	0	0	0	0	0
98733	Obsl1	0.04	0.01	0	4	1	Cluster Enriched	4.2e-05	0.02	0.03	0.12	0.01	0.06	0.11	0.02	0.01	0.03	0.01	0.02	0.01	0.08	0.05	0.02	0.01	0.02	0	0	0	0	0	0.03	0.01	0	0	0	0	0	0	0	0	0	0	0	0	0	0	0	0	0
56452	Orc6	0.12	0	0	Inf	1	Cluster Enriched	0.0014121	0.07	0.08	0.34	0.08	0.13	0.11	0.37	0	0.09	0	0	0	0.46	0	0.02	0	0	0	0	0	0	0	0	0	0	0	0	0	0	0	0	0	0	0	0	0	0	0	0	0	0
269614	Pank4	0.2	0.03	0.03	6.66667	1	Cluster Enriched	0.429328	0.02	0.03	2.68	0.02	0.02	0.03	0.02	0.02	0.03	0.01	0.04	0.04	0.04	0.02	0.01	0.02	0.03	0.03	0.04	0.02	0.01	0.01	0.04	0.04	0.06	0.05	0.03	0.03	0.07	0.02	0.04	0.04	0.07	0.02	0.04	0.03	0	0	0	0.02	0
52033	Pbk	0.69	0.01	0	69	1	Cluster Enriched	1.01e-05	0.24	0.36	2.7	0.68	0.34	0.74	0.63	0.39	1.34	0.48	0.64	0.82	0.44	0.46	0.13	0	0.07	0.08	0	0	0	0	0	0	0	0	0	0	0	0	0	0	0	0	0	0	0	0	0	0	0
18538	Pcna	22.37	8.19	2.45	2.73138	1	Cluster Enriched	9.26e-13	27.23	20.84	37.59	26.59	25.33	27.73	17.25	18.49	19.41	24.75	11.93	25.77	18.03	19.81	14.8	20.78	10.97	11.5	5.66	5.63	11.54	8.69	6.11	2.5	4.86	7.08	2.92	5.26	6.43	7.24	4.33	6.4	3.59	3.26	1.22	2.66	1.05	0.86	0.96	0	0.36
236899	Pcyt1b	0.02	0	0	Inf	1	Cluster Enriched	0.177359	0	0	0	0	0	0	0	0.2	0.16	0	0	0	0	0	0	0	0	0	0	0	0	0	0	0	0	0	0	0	0	0	0	0	0	0	0	0	0	0	0	0	0
18596	Pdgfrb	0.06	0.01	0	6	1	Cluster Enriched	0.40138	0.89	0	0.02	0	0.01	0.02	0	0	0	0	0	0	0	0	0	0	0	0	0	0	0	0	0	0	0.05	0	0.02	0	0	0	0	0	0	0	0	0	0	0	0	0	0
18769	Pkig	0.02	0	0	Inf	1	Cluster Enriched	0.206524	0	0	0	0	0.12	0.24	0	0	0	0	0	0	0	0	0	0	0	0	0	0	0	0	0	0	0	0	0	0	0	0	0	0	0	0	0	0	0	0	0	0	0
18817	Plk1	0.13	0	0	Inf	1	Cluster Enriched	0.000341432	0.09	0.19	0.11	0.22	0.63	0.09	0.16	0.03	0.06	0	0.09	0.08	0.07	0.14	0.03	0.03	0.01	0	0	0	0	0	0	0	0	0	0	0	0	0	0	0	0	0	0	0	0	0	0	0	0
26432	Plod2	0.05	0	0	Inf	1	Cluster Enriched	0.129028	0.29	0	0.34	0	0.01	0.03	0	0.01	0.02	0	0	0	0	0	0	0	0.01	0.03	0	0	0	0	0	0	0	0	0	0	0	0	0	0	0	0	0	0	0	0	0	0	0
27205	Podxl	0.14	0	0.03	4.66667	1	Cluster Enriched	0.000341358	0.37	0.17	0.4	0.14	0.17	0.27	0.08	0.05	0.11	0	0.06	0.11	0.1	0.05	0.05	0	0	0	0	0	0	0	0	0	0	0	0	0	0	0	0	0	0	0	0	0	0	0	0	0	0
18968	Pola1	0.45	0.03	0	15	1	Cluster Enriched	0.0331055	0.69	0.1	0.36	0.2	0.17	0.19	0.19	0.16	0.15	0.07	3.33	0.3	0.3	0.32	0.22	0.06	0.07	0.04	0.05	0.02	0.02	0	0	0	0.02	0	0.08	0	0	0	0	0	0	0	0	0	0	0	0	0	0
18971	Pold1	0.36	0.13	0.05	2.76923	1	Cluster Enriched	2.02e-07	0.28	0.33	0.65	0.46	0.54	0.71	0.31	0.39	0.33	0.15	0.24	0.35	0.27	0.21	0.23	0.15	0.1	0.29	0.08	0.13	0.1	0.04	0.09	0.03	0.07	0.33	0.15	0.09	0.42	0.05	0	0.04	0.15	0	0.15	0.01	0	0	0	0	0
67967	Pold3	0.36	0.11	0	3.27273	1	Cluster Enriched	3.81e-05	0.42	0.47	0.5	0.13	0.95	0.73	0.2	0.62	0.21	0.47	0.12	0.11	0.15	0.29	0	0.03	0.11	0	0	0	0	0.06	0.57	0.51	0	0	0	0	0	0	0	0	0	0	0	0	0	0	0	0	0
18973	Pole	0.06	0	0	Inf	1	Cluster Enriched	1.4e-10	0.05	0.03	0.1	0.05	0.06	0.12	0.08	0.07	0.04	0.04	0.02	0.04	0.02	0.07	0.04	0.03	0	0.01	0	0	0	0	0	0	0	0	0	0	0	0	0	0	0	0	0	0	0	0	0	0	0
18974	Pole2	0.05	0	0	Inf	1	Cluster Enriched	0.000326131	0.08	0.05	0.04	0.14	0.09	0.14	0	0	0	0	0	0	0.05	0.1	0	0	0	0	0	0	0	0	0	0	0	0	0	0	0	0	0	0	0	0	0	0	0	0	0	0	0
70428	Polr3b	0.07	0	0	Inf	1	Cluster Enriched	0.044847	0.52	0.01	0.03	0.19	0.01	0.2	0	0	0	0.13	0.01	0	0	0	0	0	0	0	0	0	0	0	0	0	0	0	0	0	0	0	0	0	0	0	0	0	0	0	0	0	0
67724	Pop1	0.06	0.02	0	3	1	Cluster Enriched	8.2e-05	0.08	0.14	0.02	0.13	0.18	0.07	0.06	0.02	0.04	0.01	0.03	0.02	0.05	0.02	0.04	0	0.02	0.01	0	0.01	0.06	0	0.04	0.02	0	0.02	0.09	0	0	0	0	0	0	0	0	0	0	0	0	0	0
66101	Ppih	0.53	0	0.17	3.11765	1	Cluster Enriched	0.00201995	1.02	1.27	0	0	0	0	0.75	0.76	0.75	0.64	0.76	0.66	0.84	0	0.54	0	0	0	0	0	0	0	0	0	0	0	0	0	0	0	0	0.46	0.95	0	0	0	1.37	0	0.32	0	0
76448	Ppp1r18	0.02	0	0	Inf	1	Cluster Enriched	0.0314714	0.02	0.03	0.13	0	0.03	0.02	0.01	0.02	0.01	0	0	0	0	0	0	0	0	0	0	0	0	0	0	0	0	0	0	0	0	0	0	0	0	0	0	0	0	0	0	0	0
233406	Prc1	0.13	0.01	0	13	1	Cluster Enriched	4.61e-07	0.08	0.06	0.31	0.1	0.3	0.22	0.17	0.24	0.1	0.06	0.03	0.04	0.06	0.07	0.07	0.03	0.02	0	0.01	0	0.04	0	0	0	0	0	0	0	0	0	0	0	0	0	0	0	0	0	0	0	0
19075	Prim1	0.39	0.09	0.01	4.33333	1	Cluster Enriched	1.21e-09	0.4	0.54	0.88	0.7	0.5	0.33	0.41	0.25	0.39	0.14	0.29	0.24	0.25	0.32	0.14	0.18	0.11	0.16	0.09	0.11	0.08	0.06	0.02	0.09	0	0.09	0.11	0.05	0.09	0	0	0	0	0	0	0	0	0	0	0	0
19076	Prim2	0.32	0.08	0	4	1	Cluster Enriched	2.08e-14	0.36	0.4	0.48	0.51	0.32	0.28	0.16	0.26	0.39	0.2	0.32	0.39	0.23	0.22	0.33	0.16	0.14	0.16	0.01	0.12	0.15	0.03	0.04	0	0	0.02	0.12	0	0	0	0	0	0	0	0	0	0	0	0	0	0
71974	Prmt3	0.43	0.11	0	3.90909	1	Cluster Enriched	1.86e-05	0.32	0.35	1.28	0.4	0.64	0.46	0.18	0.34	0.44	0.73	0.11	0.48	0.38	0.34	0.06	0.96	0.1	0.11	0.03	0	0.02	0	0	0	0.06	0.06	0	0	0	0	0	0	0	0	0	0	0	0	0	0	0
19200	Pstpip1	0.01	0	0	Inf	1	Cluster Enriched	0.373481	0	0	0	0	0	0	0	0.16	0.01	0	0	0	0	0	0	0	0	0	0	0	0	0	0	0	0	0	0	0	0	0	0	0	0	0	0	0	0	0	0	0	0
19223	Ptgis	0.01	0	0	Inf	1	Cluster Enriched	0.28779	0.09	0	0.02	0	0	0	0	0	0	0	0	0	0	0	0	0	0	0	0	0	0	0	0	0	0	0	0	0	0	0	0	0	0	0	0	0	0	0	0	0	0
26934	Racgap1	0.1	0	0	Inf	1	Cluster Enriched	0.00263391	0.5	0.04	0.37	0.15	0.08	0.12	0.04	0.03	0.02	0.02	0.05	0.02	0.05	0.03	0.04	0	0	0	0	0	0	0	0	0	0	0	0	0	0	0	0	0	0	0	0	0	0	0	0	0	0
58186	Rad18	0.07	0	0	Inf	1	Cluster Enriched	3.12e-09	0.11	0.08	0.08	0.1	0.06	0.13	0.02	0.05	0.11	0.07	0.04	0.02	0.05	0.06	0	0.05	0.01	0	0	0	0	0	0	0	0	0	0	0	0	0	0	0	0	0	0	0	0	0	0	0	0
19361	Rad51	0.06	0	0	Inf	1	Cluster Enriched	6.33e-07	0.1	0.18	0.14	0.06	0.07	0.08	0.07	0	0.06	0.05	0.05	0	0.06	0.03	0	0	0	0	0	0	0	0	0	0	0	0	0	0	0	0	0	0	0	0	0	0	0	0	0	0	0
19362	Rad51ap1	0.12	0.01	0	12	1	Cluster Enriched	8.3e-06	0.12	0.08	0.36	0.23	0.17	0.19	0.18	0	0.18	0.09	0.07	0.1	0	0	0	0	0.05	0.04	0	0	0	0	0	0	0	0	0	0	0	0	0	0	0	0	0	0	0	0	0	0	0
108911	Rcc2	6.71	2.85	0.61	2.35439	1	Cluster Enriched	1.93e-10	11.16	10.02	13.53	6.48	7.38	7.71	5.58	4.72	5.55	6.37	3.77	4.58	6.09	4.41	3.36	5.04	3.32	2.76	2.48	3.49	2.62	2.43	2.58	1.64	3.1	3.33	1.43	2.14	1.1	2	1.02	0.7	0.97	0.45	0.53	0.64	0.37	0.1	0.31	0.1	0.14
19687	Rfc1	0.22	0.08	0.02	2.75	1	Cluster Enriched	0.000567663	0.24	0.26	0.11	0.9	0.12	0.17	0.22	0.21	0.07	0.08	0.17	0.15	0.37	0.12	0.16	0.11	0.05	0.11	0.02	0.31	0.06	0.01	0	0.03	0	0.27	0.04	0	0	0	0	0.12	0.01	0.1	0.04	0.01	0	0	0	0	0
69263	Rfc3	0.58	0.15	0.15	3.86667	1	Cluster Enriched	0.000403447	0.82	0.65	1.11	1.04	0.54	0.67	0.56	0.42	0.39	0.28	0.61	0.33	0.64	0.46	0.18	0.38	0.13	0.22	0.09	0.11	0.14	0.16	0.15	0.17	0.08	0.11	0.08	1.65	0.18	0.1	0	0.09	0.14	0.16	0.15	0.1	0	0.04	0.04	0	0
106344	Rfc4	2.21	0.62	0.21	3.56452	1	Cluster Enriched	4.63e-10	2.2	1.34	4.02	2.64	2.41	4.21	3.15	1.91	2.36	1.09	1.27	2.26	1.74	1.92	0.69	0.73	1.17	0.48	0.42	0.87	0.72	0.28	0.72	0.24	0.48	1.04	0.31	0.47	0.23	0.65	0	0.85	0.43	0.36	0.26	0	0.26	0.19	0	0	0
19743	Rhag	0.31	0	0	Inf	1	Cluster Enriched	9.85e-10	0.26	0.3	0.16	0.33	0.15	0.2	0.3	0.13	0.47	0.26	0.39	0.77	0.55	0.22	0.09	0	0	0	0	0	0	0	0	0	0	0	0	0	0	0	0	0	0	0	0	0	0	0	0	0	0
51869	Rif1	0.32	0.07	0	4.57143	1	Cluster Enriched	0.000358024	0.26	0.16	0.48	0.61	0.42	0.04	0.12	0.49	0.84	0.59	0.06	0.64	0.05	0.03	0	0.01	0.79	0.02	0	0	0	0	0	0	0	0	0	0	0	0	0	0	0	0	0	0	0	0	0	0	0
19821	Rnf2	0.26	0.08	0.01	3.25	1	Cluster Enriched	1.91e-06	0.31	0.1	0.7	0.39	0.34	0.35	0.29	0.27	0.39	0.07	0.11	0.1	0.19	0.19	0.07	0.05	0	0.13	0	0.27	0.1	0	0	0	0.19	0	0.2	0	0	0	0	0	0	0.04	0	0.09	0	0	0	0	0
19822	Rnf4	0.04	0	0	Inf	1	Cluster Enriched	0.174839	0.29	0	0.26	0	0	0	0	0	0	0	0	0	0	0	0	0	0	0	0	0	0	0	0	0	0	0	0	0	0	0	0	0	0	0	0	0	0	0	0	0	0
19891	Rpa2	2.41	0.68	0.31	3.54412	1	Cluster Enriched	5.34e-09	2	2.05	5.55	2.27	2.32	2.83	2.57	2.27	2.49	1.6	1.23	3.31	1.06	1.94	2.62	1.7	0.42	1.26	0.45	0.82	1.15	0	0	0	0.67	1.24	0.49	0.41	0.79	0.8	0	0.35	0.79	1.5	0.37	0.53	0	0	0	0	0
68925	Rpap1	0.02	0	0	Inf	1	Cluster Enriched	4.87e-07	0.02	0.01	0.04	0.03	0.03	0.02	0.03	0.02	0.01	0.01	0.01	0.01	0	0	0	0	0	0	0	0	0	0	0	0	0	0	0	0	0	0	0	0	0	0	0	0	0	0	0	0	0
70285	Rpf1	0.02	0	0	Inf	1	Cluster Enriched	0.0376392	0	0	0	0.16	0.04	0.06	0.06	0	0.03	0	0	0	0	0	0	0	0	0	0	0	0	0	0	0	0	0	0	0	0	0	0	0	0	0	0	0	0	0	0	0	0
67239	Rpf2	0.11	0.02	0	5.5	1	Cluster Enriched	0.00952507	0.04	0.63	0	0.29	0.07	0.08	0.14	0	0.07	0	0.11	0.04	0.04	0.18	0	0	0	0	0	0	0	0	0	0	0	0.12	0.07	0	0	0	0	0	0	0	0	0	0	0	0	0	0
20133	Rrm1	5.02	1.96	0.43	2.56122	1	Cluster Enriched	4.98e-12	4.72	3.81	8.67	4.54	7.52	6.58	4.33	5.71	5.66	3.2	3.11	6.78	4.07	3.24	3.41	3.12	2.47	4.6	0.92	1.54	2.44	1.54	1.46	1.08	1.06	1.86	1.41	0.96	1.24	0.69	1.23	0.49	0.71	0.34	0.46	0.64	0.21	0.25	0.41	0	0
20135	Rrm2	2.78	0.7	0.12	3.97143	1	Cluster Enriched	3.13e-12	4.35	3.04	3.68	3.15	3.28	3.94	4.04	1.96	2.41	1.55	1.67	1.73	3.34	2.71	0.88	1.47	1.26	0.86	0.68	1.14	0.75	0.18	0.25	0.15	0.18	1.21	0.22	0.92	0.88	0	0.07	0.19	0.14	0	0	0	0	0	0	0	0
67223	Rrp15	0.08	0.01	0	8	1	Cluster Enriched	0.0927312	0	0.15	0.54	0.35	0.12	0	0	0	0	0	0	0	0	0	0	0	0	0	0	0	0	0.03	0.12	0	0	0	0	0	0	0	0	0	0	0	0	0	0	0	0	0	0
72462	Rrp1b	0.22	0.01	0	22	1	Cluster Enriched	5.15e-06	0.51	0.18	0.35	0.36	0.16	0.62	0.2	0.24	0.05	0.02	0.1	0.05	0.05	0.45	0.03	0.01	0.02	0.07	0	0	0	0	0	0	0	0.03	0.02	0	0	0	0	0	0	0	0	0	0	0	0	0	0
74131	Sash3	0.02	0	0	Inf	1	Cluster Enriched	0.000358169	0	0	0	0.04	0.04	0.06	0.03	0	0.01	0.06	0.02	0.05	0	0	0	0	0	0	0	0	0	0	0	0	0	0	0	0	0	0	0	0	0	0	0	0	0	0	0	0	0
231452	Sdad1	0.15	0.04	0	3.75	1	Cluster Enriched	0.0293566	0.44	0.1	0.03	0.13	0	0.08	0.1	0.01	0	0.7	0.04	0	0.03	0.57	0	0.39	0.03	0.01	0	0	0	0.04	0.04	0	0	0	0	0	0	0	0	0	0	0	0	0	0	0	0	0	0
66286	Sec11c	0.12	0.05	0.03	2.4	1	Cluster Enriched	0.112563	0	0.17	0.11	0.15	0.02	0.3	0.43	0.11	0	0	0	0	0.15	0	0.36	0	0	0	0	0	0	0	0	0	0.41	0	0.15	0	0.19	0.31	0	0	0	0	0	0	0	0	0	0	0
72281	Sh2d4a	0.14	0.02	0	7	1	Cluster Enriched	0.0783196	0.2	0	0.17	0.95	0.56	0.19	0	0	0	0	0	0	0	0	0	0.26	0.04	0	0	0	0	0	0	0	0	0	0	0	0	0	0	0	0	0	0	0	0	0	0	0	0
20419	Shcbp1	0.12	0.02	0	6	1	Cluster Enriched	2.5e-08	0.23	0.11	0.18	0.18	0.09	0.21	0.17	0.04	0.05	0.07	0.05	0.12	0.19	0.17	0.01	0.11	0.11	0.02	0	0.03	0.02	0	0	0	0	0	0	0	0	0	0	0	0	0	0	0	0	0	0	0	0
72171	Shq1	0.02	0	0	Inf	1	Cluster Enriched	0.000523985	0.04	0	0.05	0.03	0.05	0.03	0.04	0	0.02	0	0	0	0	0	0	0	0	0	0	0	0	0	0	0	0	0	0	0	0	0	0	0	0	0	0	0	0	0	0	0	0
219114	Ska3	0.02	0	0	Inf	1	Cluster Enriched	0.0586234	0	0	0	0.04	0.03	0.13	0.02	0.02	0.01	0	0	0	0	0	0	0	0	0	0	0	0	0	0	0	0	0	0	0	0	0	0	0	0	0	0	0	0	0	0	0	0
27401	Skp2	0.08	0	0	Inf	1	Cluster Enriched	0.059867	0	0.06	0.38	0.25	0	0.51	0	0	0	0	0	0	0	0	0	0	0	0	0	0	0	0	0	0	0	0	0	0	0	0	0	0	0	0	0	0	0	0	0	0	0
20492	Slbp	0.05	0	0	Inf	1	Cluster Enriched	6.61e-05	0	0	0	0.06	0.1	0.07	0.12	0.03	0.09	0.11	0.08	0.02	0	0	0	0	0	0	0	0	0	0	0	0	0	0	0	0	0	0	0	0	0	0	0	0	0	0	0	0	0
209837	Slc38a5	0.15	0	0	Inf	1	Cluster Enriched	1.2e-07	0	0.16	0.16	0.15	0.18	0	0.31	0.13	0.1	0.04	0.21	0.27	0.26	0.34	0	0	0	0	0	0	0	0	0	0	0	0	0	0	0	0	0	0	0	0	0	0	0	0	0	0	0
17128	Smad4	0.01	0	0	Inf	1	Cluster Enriched	0.0335698	0	0	0	0	0.04	0.06	0	0	0	0	0	0	0.02	0	0.05	0	0	0	0	0	0	0	0	0	0	0	0	0	0	0	0	0	0	0	0	0	0	0	0	0	0
20588	Smarcc1	0.61	0.28	0.08	2.17857	1	Cluster Enriched	4.57e-11	0.6	0.56	1.11	0.84	0.69	0.91	0.61	0.48	0.64	0.3	0.4	0.5	0.57	0.38	0.59	0.4	0.42	0.59	0.15	0.18	0.17	0.19	0.22	0.16	0.32	0.28	0.27	0.14	0.15	0.2	0.11	0.12	0.18	0.09	0.13	0	0.06	0.12	0	0	0
14211	Smc2	1.81	0.6	0.12	3.01667	1	Cluster Enriched	1.45e-11	1.41	1.38	3.62	1.45	2.65	1.8	1.57	2.72	2.32	1.09	1.18	1.86	1.45	1.02	1.65	0.97	1.02	0.79	0.45	0.53	0.69	0.41	0.32	0.68	0.4	0.53	0.35	0.57	0.42	0.39	0.31	0.11	0.14	0.25	0.03	0.02	0	0	0	0	0
70099	Smc4	1.32	0.38	0.05	3.47368	1	Cluster Enriched	4.27e-10	0.88	1.28	2.25	0.95	2.79	2.42	1.18	1.27	1.2	0.7	0.63	1.39	1.01	1.09	0.83	0.49	0.7	0.58	0.16	0.32	0.62	0.15	0.31	0.42	0.26	0.4	0.19	0.19	0.21	0.16	0.04	0.08	0.17	0	0	0	0	0	0	0	0
77626	Smpd4	0.1	0.04	0.03	2.5	1	Cluster Enriched	0.00123993	0.07	0.18	0.28	0.13	0.09	0.08	0.15	0.1	0.09	0.03	0.1	0.02	0.06	0.08	0.05	0.02	0.01	0.04	0.03	0.04	0	0.03	0.07	0.04	0.13	0.03	0.06	0.02	0.02	0.02	0	0	0	0.03	0.02	0.02	0	0	0	0.14	0
20638	Snrpb	2.66	0	0	Inf	1	Cluster Enriched	8.65e-05	1.97	0	8.83	0	5.22	6.45	3.14	3.38	4.5	0	0	0	0	3.58	2.84	0	0	0	0	0	0	0	0	0	0	0	0	0	0	0	0	0	0	0	0	0	0	0	0	0	0
50850	Spast	0.01	0	0	Inf	1	Cluster Enriched	0.00848943	0.02	0.03	0.03	0	0	0	0	0	0	0	0	0	0.02	0.04	0	0	0	0	0	0	0	0	0	0	0	0	0	0	0	0	0	0	0	0	0	0	0	0	0	0	0
67629	Spc24	0.33	0.11	0.01	3	1	Cluster Enriched	6.8e-07	0.54	0.38	0.46	0.33	0.34	0.42	0.3	0.25	0.29	0.41	0.33	0.14	0.38	0.4	0	0.41	0.24	0	0	0	0	0	0.65	0.02	0	0	0	0	0	0	0	0.09	0.06	0.02	0.01	0	0	0	0	0	0
20737	Spn	0.05	0.02	0	2.5	1	Cluster Enriched	0.142106	0	0	0	0.11	0	0.32	0	0.08	0.2	0	0	0	0	0	0	0	0	0	0	0.18	0.06	0	0	0	0	0	0	0	0	0	0	0	0	0	0	0	0	0	0	0	0
20937	Suv39h1	0.18	0	0	Inf	1	Cluster Enriched	1.14e-09	0.28	0.19	0.22	0.06	0.31	0.24	0.28	0.04	0.11	0.18	0.1	0.16	0.4	0.2	0	0	0	0	0	0	0	0	0	0	0	0	0	0	0	0	0	0	0	0	0	0	0	0	0	0	0
52615	Suz12	0.11	0.03	0	3.66667	1	Cluster Enriched	2.45e-11	0.14	0.14	0.16	0.15	0.13	0.04	0.15	0.1	0.16	0.15	0.12	0.09	0.06	0.05	0.02	0.05	0	0.02	0.05	0.04	0.02	0.01	0.01	0.04	0.02	0.01	0.04	0.04	0.02	0	0	0	0	0	0	0	0	0	0	0	0
21335	Tacc3	0.19	0	0	Inf	1	Cluster Enriched	2.54e-05	0.17	0.19	0.68	0.18	0.22	0.45	0.19	0.2	0.18	0	0.16	0.19	0	0	0	0	0	0	0	0	0	0	0	0	0	0	0	0	0	0	0	0	0	0	0	0	0	0	0	0	0
226182	Taf5	0.05	0.01	0	5	1	Cluster Enriched	3.22e-06	0.04	0.04	0.11	0.14	0.05	0.06	0.02	0.06	0.03	0.02	0.02	0.05	0.02	0.03	0.01	0.03	0	0.04	0	0	0	0	0	0	0.01	0	0.01	0	0	0	0	0	0	0	0	0	0	0	0	0	0
102162	Taf5l	0.18	0	0	Inf	1	Cluster Enriched	0.0935665	1.61	0.03	0.37	0.02	0.15	0	0.1	0.33	0	0	0	0	0.14	0.01	0	0	0	0	0	0	0	0	0	0	0	0	0	0	0	0	0	0	0	0	0	0	0	0	0	0	0
108143	Taf9	0.01	0	0	Inf	1	Cluster Enriched	0.235653	0	0	0	0.08	0.03	0	0	0	0	0	0	0	0	0	0	0	0	0	0	0	0	0	0	0	0	0	0	0	0	0	0	0	0	0	0	0	0	0	0	0	0
21374	Tbp	0.01	0	0	Inf	1	Cluster Enriched	0.0334587	0.03	0.06	0	0	0	0	0	0	0	0	0	0	0.03	0	0.03	0	0	0	0	0	0	0	0	0	0	0	0	0	0	0	0	0	0	0	0	0	0	0	0	0	0
21781	Tfdp1	0.25	0	0	Inf	1	Cluster Enriched	0.0926073	0.07	0.08	2.19	0.33	0.12	0.19	0.04	0.17	0	0.02	0.42	0.03	0.01	0.03	0	0	0	0	0	0	0	0	0	0	0	0	0	0	0	0	0	0	0	0	0	0	0	0	0	0	0
21803	Tgfb1	0.14	0.02	0	7	1	Cluster Enriched	0.0418122	0.14	0.02	0.17	0.09	0.21	0.1	1	0.06	0.15	0	0	0	0.04	0.07	0	0	0	0	0	0	0	0	0	0	0	0.13	0.07	0	0	0	0	0	0	0	0	0	0	0	0	0	0
21853	Timeless	0.14	0.01	0	14	1	Cluster Enriched	3.6e-05	0.13	0.47	0.44	0.25	0.06	0.13	0.13	0.03	0.16	0.04	0.08	0.08	0.04	0.11	0.02	0.04	0.01	0.02	0	0	0	0	0	0	0	0	0	0	0	0	0	0	0	0	0	0	0	0	0	0	0
21877	Tk1	0.87	0.25	0	3.48	1	Cluster Enriched	2.34e-12	0.54	0.96	0.69	0.66	0.9	0.48	1.12	1.2	1.12	0.8	0.85	1.64	1.17	0.37	0.58	0.65	0.23	0.44	0	0.37	0.33	0.17	0.16	0.18	0	0.27	0.24	0	0	0	0	0	0	0	0	0	0	0	0	0	0
217353	Tmc6	0.01	0	0	Inf	1	Cluster Enriched	0.176284	0	0	0	0	0	0	0.06	0	0.05	0	0	0	0	0	0	0	0	0	0	0	0	0	0	0	0	0	0	0	0	0	0	0	0	0	0	0	0	0	0	0	0
72749	Tonsl	0.01	0	0	Inf	1	Cluster Enriched	0.0096766	0.01	0.01	0.04	0.01	0.03	0.03	0	0	0	0	0	0	0	0	0	0	0	0	0	0	0	0	0	0	0	0	0	0	0	0	0	0	0	0	0	0	0	0	0	0	0
21973	Top2a	1.68	0.58	0.21	2.89655	1	Cluster Enriched	5.07e-08	1.56	2.52	3.8	2.52	2.01	0.92	1.93	1.31	1.14	0.81	1.39	1.08	1.44	1.47	1.27	0.95	0.7	0.77	0.39	0.98	0.84	0.63	0.23	0.24	0.29	0.65	0.33	1.28	1.42	0.45	0.09	0.12	0.22	0.03	0.1	0.09	0	0	0	0	0
235559	Topbp1	0.04	0	0	Inf	1	Cluster Enriched	0.000722942	0.05	0.02	0.19	0.01	0.06	0.03	0.02	0.01	0.02	0.01	0.05	0.02	0.02	0.06	0	0	0	0	0	0	0	0	0	0	0	0	0	0	0	0	0	0	0	0	0	0	0	0	0	0	0
72119	Tpx2	0.21	0.01	0	21	1	Cluster Enriched	4.88e-06	0.44	0.54	0.54	0.25	0.26	0.11	0.19	0.06	0.08	0	0.1	0.36	0.05	0.14	0.04	0	0.02	0.05	0	0	0	0	0	0	0	0	0	0	0	0	0	0	0	0	0	0	0	0	0	0	0
66949	Trim59	0.01	0	0	Inf	1	Cluster Enriched	0.247965	0	0	0	0	0.06	0.02	0	0	0	0	0	0	0	0	0	0	0	0	0	0	0	0	0	0	0	0	0	0	0	0	0	0	0	0	0	0	0	0	0	0	0
69716	Trip13	0.58	0.28	0.03	2.07143	1	Cluster Enriched	3.14e-05	0.36	0.38	1.05	1.42	0.52	0.42	1.1	0.5	0.35	0.29	0.11	0.71	0.19	0.86	0.41	0.18	1.07	0.77	0	0.14	0.43	0.06	0.05	0.1	0	0.18	0.36	0.04	0.35	0.1	0	0	0	0	0	0	0	0	0	0	0
21807	Tsc22d1	1.4	0.34	0.42	3.33333	1	Cluster Enriched	0.177693	0.37	0.28	0.3	3.95	6.02	2.23	0	0	0	0.25	0.23	4	0.2	0.23	2.95	0	0	0	0.26	0.29	3.59	0	0	0	0	0	0	1.37	6.21	0	0	0	0	0	0	0	0	0	0	0	0
232670	Tspan33	0.33	0.06	0	5.5	1	Cluster Enriched	4.76e-05	0.25	0.26	0.22	0.29	0.27	0.34	0.5	0.13	0	0.25	0.44	1.32	0.38	0.29	0.08	0.29	0.2	0	0.07	0.17	0	0	0	0	0	0	0	0	0	0	0	0	0	0	0	0	0	0	0	0	0
74196	Ttc27	0.14	0.01	0	14	1	Cluster Enriched	0.00235289	0.12	0.07	0.65	0.08	0.45	0.06	0.11	0.04	0.02	0.08	0.07	0.18	0.05	0.04	0.05	0.06	0.02	0.03	0.04	0	0.02	0	0	0	0	0	0	0	0.03	0.01	0	0	0	0	0	0	0	0	0	0	0
74044	Ttf2	0.02	0	0	Inf	1	Cluster Enriched	8.19e-05	0.03	0.04	0.02	0.06	0.02	0.04	0.03	0.01	0.05	0	0	0	0	0	0	0	0	0	0	0	0	0	0	0	0	0	0	0	0	0	0	0	0	0	0	0	0	0	0	0	0
22137	Ttk	0.02	0	0	Inf	1	Cluster Enriched	4.64e-07	0.02	0.01	0.03	0	0.02	0.05	0.02	0	0.02	0.01	0.02	0.02	0.02	0.01	0	0	0	0	0	0	0	0	0	0	0	0	0	0	0	0	0	0	0	0	0	0	0	0	0	0	0
28071	Twistnb	0.13	0.01	0	13	1	Cluster Enriched	0.0660281	0.06	0.06	1.07	0.16	0.06	0	0.09	0.11	0.07	0	0	0	0.27	0	0.04	0	0	0	0	0	0	0.05	0.03	0.02	0	0	0	0	0	0	0	0	0	0	0	0	0	0	0	0	0
22171	Tyms	1.21	0.47	0.23	2.57447	1	Cluster Enriched	4.99e-07	1.05	0.88	1.76	1.1	1.26	1.28	1.32	0.88	1.2	1.33	1.11	1.47	1.48	1.3	0.72	1.35	0.59	0.47	0.48	0.32	0.58	0.26	0.51	0.2	0.1	0.47	0.34	2.23	0.51	0.67	0.13	0	0.3	0	0.04	0.06	0	0.08	0.11	0	0
328795	Ubash3a	0.11	0	0	Inf	1	Cluster Enriched	3.73e-06	0.34	0.07	0.14	0.14	0.09	0.14	0.06	0.1	0.16	0.3	0.01	0.05	0.02	0.05	0.02	0	0	0	0	0	0	0	0	0	0	0	0	0	0	0	0	0	0	0	0	0	0	0	0	0	0
68612	Ube2c	3.52	0.89	0.16	3.95506	1	Cluster Enriched	2.92e-13	3.8	2.82	4.21	2.9	4.98	4.86	3.81	2.45	4.07	2.69	2.88	4.13	4.55	2.68	1.96	2.21	1.29	2.56	0.52	1.47	1.01	0.45	1.14	0	0	0	0	0.78	2.07	0.12	0	0	0	0	0	0	0	0	0	0	0
67196	Ube2t	0.28	0	0	Inf	1	Cluster Enriched	0.00044068	1.02	0	0.76	0	0.32	0.4	0.35	0	0.32	0.66	0	0.38	0	0	0	0	0	0	0	0	0	0	0	0	0	0	0	0	0	0	0	0	0	0	0	0	0	0	0	0	0
18140	Uhrf1	1.1	0.21	0.02	5.2381	1	Cluster Enriched	3.11e-09	1.52	1.22	2.72	1.63	1.3	0.96	1.65	0.52	0.9	0.42	0.6	0.81	0.69	1.01	0.5	0.65	0.32	0.17	0.15	0.18	0.15	0.06	0.23	0.07	0.15	0.33	0.11	0.11	0.15	0.06	0	0.08	0.02	0	0	0	0	0	0	0	0
70450	Unc13d	0.07	0	0	Inf	1	Cluster Enriched	2.46e-10	0.08	0.08	0.11	0.17	0.07	0.09	0.04	0.03	0.06	0.05	0.08	0.05	0.11	0.03	0.03	0.03	0.02	0.01	0	0	0	0	0	0	0	0	0	0	0	0	0	0	0	0	0	0	0	0	0	0	0
382038	Urb2	0.01	0	0	Inf	1	Cluster Enriched	0.0105558	0.02	0.03	0.03	0	0.01	0.03	0	0	0	0	0	0	0	0	0	0	0	0	0	0	0	0	0	0	0	0	0	0	0	0	0	0	0	0	0	0	0	0	0	0	0
241627	Wdr76	0.24	0.05	0	4.8	1	Cluster Enriched	2.07e-05	0.09	0.06	0.62	0.32	0.31	0.11	0.36	0.08	0.58	0.2	0.07	0.14	0.32	0.36	0	0.26	0.32	0	0	0	0	0	0	0	0	0	0	0	0	0	0	0	0	0	0	0	0	0	0	0	0
22682	Zfand5	0.01	0	0	Inf	1	Cluster Enriched	0.0956956	0.04	0	0.1	0.02	0.02	0	0	0	0	0	0	0	0	0	0	0	0	0	0	0	0	0	0	0	0	0	0	0	0	0	0	0	0	0	0	0	0	0	0	0	0
68040	Zfp593	0.3	0	0	Inf	1	Cluster Enriched	5.21e-05	0.82	0.87	0.49	0.4	0.42	0	0	0.27	0.31	0	0	0	0.5	0.36	0	0	0	0	0	0	0	0	0	0	0	0	0	0	0	0	0	0	0	0	0	0	0	0	0	0	0
68014	Zwilch	0.09	0	0	Inf	1	Cluster Enriched	1.43e-12	0.06	0.09	0.19	0.1	0.09	0.14	0.1	0.06	0.08	0.03	0.07	0.07	0.12	0.08	0.05	0.03	0.01	0.01	0	0	0	0	0	0	0	0	0	0	0	0	0	0	0	0	0	0	0	0	0	0	0
67469	Abhd5	0	0.09	0.02	4.5	2	Cluster Enriched	0.00229264	0	0	0	0	0	0	0	0	0	0	0	0	0	0	0	0	0	0	0.15	0.13	0	0	0.07	0.08	0.24	0.19	0.19	0.14	0.07	0.18	0	0	0	0	0	0	0	0	0	0	0
14200	Fhl2	0	0.01	0	Inf	2	Cluster Enriched	0.00448242	0	0	0	0	0	0	0	0	0	0	0	0	0	0	0	0	0	0	0	0	0	0	0.05	0.03	0	0.05	0.04	0	0	0	0	0	0	0	0	0	0	0	0	0	0
14360	Fyn	0.06	0.16	0.03	2.66667	2	Cluster Enriched	0.299352	0.07	0.09	0.07	0	0.04	0.06	0.07	0.11	0.05	0.07	0.06	0.04	0.12	0.11	0	0.05	0.07	0.21	0	0	0	0	0.08	0.02	0	0.06	1.46	0	0	0	0.14	0.08	0.07	0.08	0.05	0	0	0	0	0	0
78816	Gmip	0	0.01	0	Inf	2	Cluster Enriched	0.241665	0	0	0	0	0	0	0	0	0	0	0	0	0	0	0	0	0.01	0.1	0	0	0	0	0	0	0	0	0	0	0	0	0	0	0	0	0	0	0	0	0	0	0
23888	Gpc6	0	0.03	0.01	3	2	Cluster Enriched	0.100821	0	0	0	0	0	0	0	0	0	0	0	0	0	0	0	0.04	0.01	0	0.04	0.02	0	0	0.14	0.02	0	0.04	0.05	0	0	0	0	0.17	0.02	0	0	0	0	0	0	0	0
15270	H2afx	0	31.58	11.38	2.77504	2	Cluster Enriched	0.04389	0	0	0	0	0	0	0	0	0	0	0	0	0	0	0	0	0	0	0	0	0	67.53	0	81.09	112.06	0	118.33	0	0	0	0	0	0	0	0	0	0	75.91	62.03	0	0
94275	Maged1	0.03	0.07	0	2.33333	2	Cluster Enriched	0.000924465	0.02	0.03	0.09	0	0.04	0.01	0	0.04	0.06	0.02	0.01	0.06	0.02	0.02	0.03	0.23	0.06	0.04	0.07	0.04	0	0	0	0	0.11	0.2	0.08	0	0	0	0	0	0	0	0	0	0	0	0	0	0
50918	Myadm	0.32	2.3	0.7	3.28571	2	Cluster Enriched	2.33e-07	0.05	0	0.3	0.17	0.1	0.08	0.36	0.49	0.3	0.24	0.38	0.49	0.24	0.3	1.26	0.93	0.95	3.28	3.71	2.8	2.46	1.72	3.43	1.32	3.12	2.65	1.19	0.89	0	1.6	1.46	0.59	0.95	0	2.45	1.56	0.36	0	0.19	0.28	1.76
226101	Myof	0.01	0.07	0.02	3.5	2	Cluster Enriched	0.00721789	0	0	0	0	0	0	0	0	0	0.03	0	0.01	0.08	0.04	0.01	0.02	0.03	0.07	0.15	0.17	0.04	0.06	0.14	0.03	0.06	0.03	0.06	0.12	0.07	0.04	0.19	0	0.03	0	0	0	0	0	0	0	0
17972	Ncf4	0.07	0.21	0.08	2.625	2	Cluster Enriched	0.0709218	0	0	0	0	0	0	0.03	0.1	0.08	0.03	0.2	0.08	0.25	0.15	0.1	0.02	0.23	0.21	0.23	0.3	0.31	0.05	0.32	0.16	0	0.56	0.13	0.04	0.06	0.22	0.83	0.13	0.14	0	0	0	0	0	0	0	0
18452	P4ha2	0.04	0.1	0	2.5	2	Cluster Enriched	0.00391869	0.01	0.11	0.07	0.08	0.04	0.11	0	0.05	0.04	0	0.06	0.08	0	0	0	0	0.23	0.26	0.15	0.27	0.26	0	0	0	0	0	0	0	0	0	0	0	0	0	0	0	0	0	0	0	0
64099	Parvg	0.01	0.04	0	4	2	Cluster Enriched	0.000321723	0	0	0	0.02	0.01	0.03	0	0	0	0.03	0.01	0	0.04	0.01	0.03	0	0.02	0.13	0	0.03	0.02	0.08	0	0.06	0.09	0.09	0	0	0	0	0	0	0	0	0	0	0	0	0	0	0
58234	Shank3	0	0.05	0.01	5	2	Cluster Enriched	0.345885	0	0	0	0	0	0	0	0	0	0	0	0	0	0	0	0	0	0	0	0	0	0	0	0	0	0.53	0.02	0	0	0	0.02	0	0.1	0	0	0	0	0	0	0	0
54353	Skap2	0.06	0.13	0.06	2.16667	2	Cluster Enriched	0.0875424	0.15	0	0.08	0	0	0	0	0.13	0.14	0.09	0	0.07	0.02	0	0.22	0.1	0.02	0.21	0.13	0.19	0.17	0.03	0.08	0.13	0.28	0.07	0.11	0.17	0.14	0.24	0.13	0.19	0.19	0	0	0	0	0	0	0	0
20454	St3gal5	0.04	0.28	0.03	7	2	Cluster Enriched	0.0002405	0	0	0	0.12	0	0.08	0.1	0.05	0.06	0	0	0	0.05	0.02	0.08	0	0	0	0.11	0.36	0	0.34	0.88	0.3	0.6	0.45	0.36	0	0.11	0.11	0	0.22	0.14	0	0	0	0	0	0	0	0
20868	Stk10	0.28	0.81	0.12	2.89286	2	Cluster Enriched	0.144828	0.07	0.02	0.29	0.01	0.35	0.03	0.03	0.68	0.43	0.02	0.11	1.93	0.12	0.07	0.04	0.12	0.03	4.17	0.06	0.07	4.02	0.03	0.28	0.16	0.22	0.27	0.24	0.04	1.03	0.49	0.11	0.31	0.18	0	0	0	0	0	0	0	0
21804	Tgfb1i1	0	0.04	0.01	4	2	Cluster Enriched	0.00530841	0.01	0	0.02	0	0	0	0	0	0	0	0	0	0.02	0	0.02	0	0.02	0.03	0.03	0.04	0.13	0	0.04	0.04	0.05	0.06	0.04	0.09	0	0.03	0.08	0	0.03	0	0	0	0	0	0	0	0
22324	Vav1	0.03	0.13	0.01	4.33333	2	Cluster Enriched	0.0540927	0.04	0.03	0	0.06	0.01	0.04	0	0.03	0.09	0.01	0.03	0.05	0	0	0	0.03	0	0.84	0.15	0.1	0.17	0.01	0.01	0.2	0	0	0	0.03	0	0.01	0	0.05	0.01	0	0	0	0	0	0	0	0
18671	Abcb1a	0	0.03	0.09	3	3	Cluster Enriched	0.367738	0	0	0	0	0	0	0	0	0	0	0	0	0	0	0	0	0	0	0	0	0	0	0.03	0.13	0	0.15	0.04	0	0	0	1.2	0.24	0.09	0.05	0.01	0.1	0	0	0	0	0
66948	Acad8	0.2	1.07	6.68	6.24299	3	Cluster Enriched	9.26e-13	0.07	0.07	0.07	0.1	1.04	0.14	0.18	0.1	0.18	0.12	0.21	0.15	0.16	0.13	0.24	0.16	0.35	0.42	0.85	0.69	0.31	0.79	1.5	1.11	2.88	1.88	1.91	3.77	8.25	3.03	5.44	6.17	3.7	7.35	14.81	7	6.67	6.24	6.88	7.6	6.03
622402	Akr1c12	0.6	5.05	10.13	2.00594	3	Cluster Enriched	2.2e-08	0	0.05	0.13	0	0.26	0.22	0.3	0.9	0.89	0.92	1.09	0.69	0.7	0.57	2.21	1.63	1.29	2.71	2.42	5.24	1.75	6.4	7.39	2.72	18.21	5.99	4.82	5.2	3.7	5.56	8.01	10.25	7.59	13.17	6.74	8.66	8.16	13.53	11.34	13.71	10.87
214579	Aldh5a1	0.35	2.26	6.95	3.07522	3	Cluster Enriched	1.95e-10	0.11	0.13	0.21	0.23	0.23	0.14	0.28	0.47	0.32	0.43	0.51	0.51	0.5	0.23	1.01	0.53	0.79	1.72	1.32	2	1.41	1.82	3.22	1.21	6.92	4.24	1.94	4.03	3.2	3.93	6.2	5.16	2.69	9.41	6.06	7.59	10.46	9.07	7	8.99	13.71
171207	Arhgap4	0.04	0.06	0.16	2.66667	3	Cluster Enriched	0.529387	0	0	0	0	0.05	0.07	0.01	0.17	0.01	0.01	0	0.21	0	0	0	0.01	0	0.04	0.56	0.05	0	0	0	0	0.02	0.04	0.06	0.04	0.07	2	0	0.11	0.73	0	0	0	0	0	0	0	0
69719	Cad	1.75	14.91	58.27	3.90812	3	Cluster Enriched	2.23e-08	2.03	1.89	2.31	2.12	2.02	2.19	1.71	1.31	1.37	1.55	1.2	1.53	1.59	1.12	2.25	1.76	1.58	4.27	6.62	5.54	2.99	13.44	21.72	17.73	49.6	28.62	25.06	25.99	17.24	18.42	80.96	34.57	17.38	55.29	54.1	35.29	124.7	72.11	62.23	106.12	86.41
12558	Cdh2	0.04	0.12	0.48	4	3	Cluster Enriched	2.17e-10	0	0.01	0.04	0.08	0.02	0.06	0.04	0.04	0.03	0.05	0.02	0	0.07	0.01	0.11	0	0.07	0.13	0.06	0.07	0.03	0.08	0.19	0.02	0.21	0.44	0.13	0.13	0.25	0.27	0.36	0.59	0.46	0.7	0.41	0.55	0.73	0.82	0.79	0.34	0.38
12842	Col1a1	0.05	0.38	1.22	3.21053	3	Cluster Enriched	2.69e-05	0.01	0	0.18	0.16	0.14	0.07	0	0.03	0.04	0	0.06	0.08	0	0	0	0.03	0.09	0.17	0.12	0.22	0.22	0.04	1.12	0.55	0.19	1.03	0.81	0.46	1.41	1.02	0.25	1.86	2.3	3.61	1.52	2.63	0.35	1.17	0.96	0.71	0.13
320808	Dcaf5	0	0	0.01	Inf	3	Cluster Enriched	0.448495	0	0	0	0	0	0	0	0	0	0	0	0	0	0	0	0	0	0	0	0	0	0	0	0	0.02	0	0.01	0	0	0	0.09	0	0.03	0	0	0	0	0	0	0	0
71755	Dhdh	0.08	0.67	5.91	8.8209	3	Cluster Enriched	1.58e-09	0	0	0	0.06	0	0.07	0.04	0.17	0.06	0	0.11	0.18	0.12	0.08	0.25	0.1	0.16	0.36	0.41	0.6	0.38	0.61	0.82	0.38	1.32	1.65	1.2	2.34	2.56	1.73	4.06	5.04	1.97	3.97	3.49	5.11	4.77	7.4	7.9	11.82	11.18
13506	Dsc2	0	0.03	0.08	2.66667	3	Cluster Enriched	0.0266959	0	0	0	0	0	0	0	0	0	0	0	0	0	0	0	0	0	0	0	0	0	0	0.15	0.02	0.07	0.06	0.05	0	0.22	0.06	0	0.04	0.05	0.04	0.13	0	0.12	0.03	0.1	0.06	0
13511	Dsg2	0.01	0.13	0.48	3.69231	3	Cluster Enriched	3.07e-09	0	0	0	0.01	0	0.01	0	0.03	0.01	0.01	0.01	0.03	0	0	0	0.03	0.04	0.07	0.09	0.15	0.07	0.13	0.11	0.32	0.16	0.19	0.19	0.18	0.26	0.67	0.56	0.6	0.51	0.23	0.43	0.81	0.45	0.68	0.85	0.32	0.25
109620	Dsp	0.27	0.37	1.03	2.78378	3	Cluster Enriched	0.00165534	1.73	0.04	0.06	0.11	0.06	0.95	0.04	0.17	0.03	0.04	0.52	0.11	0.04	0.05	0.16	0.13	0.49	0.26	0.26	0.52	0.22	0.21	0.33	0.43	0.3	0.45	0.82	0.27	1.28	0.97	0.78	0.33	1.33	1.3	0.66	3.59	1.17	0.34	1.06	1.46	0.41
72349	Dusp3	0.54	1.95	5.54	2.84103	3	Cluster Enriched	1.18e-08	0.7	0.36	1.3	0.28	0.3	0.52	0.13	0.27	0.5	0.26	0.7	0.29	0.89	0.66	0.93	0.55	0.79	2.24	1.1	1.22	0.68	2.24	4.72	1.78	5.21	1.94	0.97	5.44	3.46	4.82	4.58	5.2	6.42	8.92	8.64	8.79	1.48	4.4	1.54	7.66	2.49
100952	Emilin1	0.11	0.14	0.45	3.21429	3	Cluster Enriched	0.35298	0.06	0.07	0.14	0.08	0.19	0.08	0.02	0.37	0.1	0.1	0.03	0.03	0.04	0.02	0.32	0.06	0.06	0.09	0.03	0.05	0.03	0.08	0.09	0.09	0.85	0.08	0.14	0.29	0.09	0.13	1.04	0.19	4.58	0.12	1.22	0.13	0.04	0.13	0.05	0.04	0.02
14073	Faah	0.04	0.55	3.78	6.87273	3	Cluster Enriched	4.3e-09	0	0	0	0	0	0	0.03	0.04	0.03	0.04	0.05	0.1	0.06	0.05	0.21	0.21	0.1	0.61	0.57	0.51	0.45	0.28	0.21	0.6	1.03	0.46	1.53	1.23	2.11	6.78	2.15	2.46	3.7	2.14	6.01	4.74	1.55	5.05	8.2	3.03	2.13
23876	Fbln5	0	0	0.16	Inf	3	Cluster Enriched	0.0302219	0	0	0	0	0	0	0	0	0	0	0	0	0	0	0	0	0	0	0	0	0	0	0	0	0	0	0	0	0	0	0.28	0.67	0.67	0.85	0.26	0.2	0	0	0	0	0
55990	Fmo2	0	0	0.26	Inf	3	Cluster Enriched	0.0127148	0	0	0	0	0	0	0	0	0	0	0	0	0	0	0	0	0	0	0	0	0	0	0	0	0	0	0	0	0	0	0	0	0	0.07	0.33	0.96	0.17	1.1	1.14	0	0.12
319625	Galm	1.1	4.72	11.38	2.41102	3	Cluster Enriched	1.14e-13	0.14	1.22	0.94	0.39	0.38	0.19	0.46	1.62	0.92	1.63	0.78	2.67	1.02	0.91	3.29	1.83	2.67	7.28	3.74	3.03	3.44	3.17	5.8	4.62	6.81	7.64	6.66	8.35	8.43	8.11	10.83	11.77	14.98	10.87	11.35	8.67	11.97	7.83	6.93	16.72	12.7
14866	Gstm5	1.62	2.79	7.02	2.51613	3	Cluster Enriched	0.000870509	1.17	1.4	1.79	1.32	0.87	0.96	1.61	1.59	1.5	1.94	1.85	1.89	2.32	1.57	2.56	2.28	2.61	2.99	3.24	2.28	2.44	3.27	3	1.65	3.83	4.15	1.79	2.78	3.31	4.42	4.63	3.17	2.49	3.16	3.84	3.64	1.09	15.45	7.32	1.33	10.13
74318	Hopx	0	0	0.06	Inf	3	Cluster Enriched	0.318784	0	0	0	0	0	0	0	0	0	0	0	0	0	0	0	0	0	0	0	0	0	0	0	0	0	0	0	0	0	0	0	0	0	0	0	0	0	0	0	0	0
15483	Hsd11b1	0.11	7	74.45	10.6357	3	Cluster Enriched	2.79e-16	0	0	0	0	0	0	0.02	0.15	0.03	0.08	0.08	0.18	0	0.03	1.03	0.67	0.51	2.6	3.71	4.86	2.16	3.08	4.99	6.03	15.21	21.16	19	29.95	51.77	59.72	59.22	56.05	86.18	73.47	67.58	86.66	67.62	102.37	92.85	106.49	69.64
235041	Kank2	0.06	0.1	0.23	2.3	3	Cluster Enriched	0.000953899	0.02	0	0.05	0.02	0.14	0.09	0.03	0.04	0.12	0.06	0.02	0.06	0.03	0.02	0.16	0.06	0.04	0.11	0.05	0.04	0.05	0.03	0.15	0.09	0.22	0.3	0.09	0.16	0.11	0.12	0.09	0.22	0.23	0.52	0.33	0.21	0.67	0.15	0.22	0.42	0.09
17161	Maoa	0.37	1.41	3.9	2.76596	3	Cluster Enriched	1.12e-10	0.14	0.34	0.12	0.28	0.28	0.18	0.36	0.36	0.31	0.39	0.42	0.52	0.47	0.23	1.1	0.87	0.7	1.37	1.22	0.84	1.35	1.1	2.58	1.05	1.92	2.26	1.71	3.66	3.34	2.1	3.8	4.5	2.4	3.89	8.57	3.71	2.84	5.6	4.82	2.97	4.59
56690	Mlycd	0.02	0.37	3.82	10.3243	3	Cluster Enriched	1.57e-11	0	0	0	0	0	0	0	0.04	0.01	0.02	0.09	0.04	0.03	0	0.09	0.03	0.3	0.2	0.14	0.11	0.06	0.14	0.45	0.4	0.64	0.97	0.95	2.12	2.26	1.23	4.07	3.2	2.47	3.11	4.29	2.85	7.2	5.48	5.01	4.07	7
64291	Osbpl1a	0.03	0.09	0.37	4.11111	3	Cluster Enriched	2.33e-07	0.01	0	0.03	0	0.01	0.02	0.01	0.05	0.01	0.02	0.01	0.13	0.01	0.01	0.08	0.01	0.04	0.1	0	0.04	0.17	0.02	0.18	0.13	0.08	0.22	0.13	0.08	0.28	0.14	0.3	0.21	0.13	0.3	0.47	0.36	0.25	0.86	0.6	0.22	0.29
224020	Pi4ka	0.06	0.06	0.13	2.16667	3	Cluster Enriched	0.195654	0.01	0.02	0.02	0.13	0.04	0.06	0.17	0.06	0.04	0.13	0.04	0.13	0.02	0.02	0.01	0.07	0.03	0.09	0.05	0.01	0.02	0.02	0.06	0.04	0.05	0.16	0.09	0.05	0.01	0.01	0.22	0.07	0.17	0.05	0.03	0	0.11	0.08	0.41	0.01	0.67
19024	Ppfibp2	0.02	0.09	0.42	4.66667	3	Cluster Enriched	1.85e-12	0	0	0	0	0.01	0.05	0.01	0.01	0.09	0.01	0.02	0.03	0.01	0	0.02	0.02	0.04	0.06	0.08	0.03	0.04	0.09	0.1	0.11	0.17	0.15	0.15	0.28	0.21	0.26	0.17	0.59	0.43	0.42	0.38	0.73	0.32	0.24	0.62	0.49	0.39
116847	Prelp	0	0.26	2.83	10.8846	3	Cluster Enriched	0.000462677	0	0	0	0	0	0	0	0	0	0	0	0	0	0	0	0	0	0	0.06	0.18	0.14	0.62	0.22	0.35	0.75	0.47	0.38	0.38	1.04	1	2.09	0.56	1.21	4.29	12.04	1.8	0.99	4.7	1.67	0.81	1.71
19130	Prox1	0.03	0.04	0.19	4.75	3	Cluster Enriched	0.144809	0	0	0	0	0.05	0.09	0.08	0.05	0	0.03	0	0.04	0.02	0.11	0	0	0	0	0.08	0.08	0.05	0	0	0	0.13	0.03	0.14	0.08	0.99	0.08	0.18	0.16	1.01	0	0	0	0	0	0	0	0
16913	Psmb8	0.11	0.35	1.7	4.85714	3	Cluster Enriched	4.55e-10	0.06	0.12	0	0	0	0	0.21	0.12	0	0.27	0.33	0.1	0.08	0.02	0.38	0.56	0.33	0.14	0.28	0.6	0	0.49	0.37	0.13	0.27	0.7	0.34	2.74	1.56	2.42	1.99	3.42	1.05	2.57	2.31	1.46	1.78	1.17	1.11	1.81	1.63
16912	Psmb9	0.03	0.06	1.22	20.3333	3	Cluster Enriched	0.000254928	0	0	0	0	0	0	0	0	0	0.09	0.12	0.17	0	0	0	0	0	0	0	0	0	0	0	0	0.19	0.52	0	1.14	1.45	2.91	0.68	4.96	1.53	1.06	1.93	0	0	0	0	0.69	0.99
68328	Rab13	0	0	0.02	Inf	3	Cluster Enriched	0.328922	0	0	0	0	0	0	0	0	0	0	0	0	0	0	0	0	0	0	0	0	0	0	0	0	0	0	0	0	0	0	0	0	0	0	0.23	0.09	0	0	0	0	0
71973	Rbpms2	0.01	0.11	1	9.09091	3	Cluster Enriched	0.0120825	0	0	0	0	0	0	0.09	0	0.06	0	0	0	0	0	0	0	0	0	0	0	0	0	0.06	0.11	0.43	0.46	0.24	0	0.08	0.51	0	0.71	0.51	0	0.2	0.24	0.76	4.54	0.34	0.58	0.92
20224	Sar1a	2.12	3.84	8.08	2.10417	3	Cluster Enriched	1.8e-11	1.59	2.96	2.49	1.27	2.04	2.38	0.77	1.31	1.7	1.67	1.14	3.87	2.68	2.6	3.39	1.68	1.59	3.79	4.94	4.13	1.88	3.86	3.59	2.8	7.18	5.37	5.33	10.53	11.57	8.34	8.69	8.66	9.44	9.58	8.41	10.26	5.7	10.58	6.82	7.61	5.55
69215	Sat2	0.13	0.12	0.53	4.07692	3	Cluster Enriched	0.00297839	0	0	0	0	0.21	0.52	0	0.56	0.45	0	0	0	0	0.02	0.24	0	0.18	0.47	0	0	0	0	0	0	0	0.33	0.48	0.66	0.46	0	0	1.84	0.33	0.76	1.28	0.62	0	0.59	0.47	0	0.28
20503	Slc16a7	0	0	0.09	Inf	3	Cluster Enriched	0.067627	0	0	0	0	0	0	0	0	0	0	0	0	0	0	0	0	0	0	0	0	0	0	0	0	0	0	0	0.13	0.05	0	0.72	0.23	0.06	0	0	0	0.08	0.18	0	0	0.08
18400	Slc22a18	0.01	0.02	0.88	44	3	Cluster Enriched	5.01e-10	0	0	0	0	0	0	0.05	0.01	0.02	0	0	0	0	0	0	0	0.05	0.02	0	0	0	0.1	0.09	0	0	0	0	0.66	0.54	0.32	1.65	1.03	0.82	2.22	0.85	1.24	0.52	0.96	0.52	1.08	1.07
65962	Slc9a3r2	0.02	0.05	0.18	3.6	3	Cluster Enriched	5.7e-05	0.01	0	0.04	0	0	0	0	0.11	0.02	0.05	0	0.1	0	0	0	0	0.07	0.07	0	0	0	0.09	0.18	0.21	0	0	0	0.24	0.14	0.08	0.22	0.06	0.26	0.05	0.53	0.25	0	0.22	0.14	0.15	0.23
235043	Tmem205	0.54	3.22	8.86	2.75155	3	Cluster Enriched	5.78e-11	0	0	0	0.18	0.25	0	0.21	1.15	0	0	1.28	1.86	0.31	0	2.84	0	1.51	5.79	3.73	4.72	1.78	1.73	3.43	2.56	2.91	2.65	7.88	10.1	7.86	12.61	6.08	14.66	10.07	4.8	9.39	7.94	0	11.4	9.78	6.37	10
99887	Tmem56	0.01	0.03	0.63	21	3	Cluster Enriched	4.12e-08	0	0.09	0.03	0	0	0	0	0.02	0.05	0	0	0	0	0	0	0	0	0	0	0	0	0	0	0	0	0.16	0.17	0.49	0.36	0.73	1.01	0.97	1.37	0	0.77	1.46	0.65	0.5	0.57	0.42	0.14
228140	Tnks1bp1	0.02	0.13	0.29	2.23077	3	Cluster Enriched	0.000100307	0	0	0	0.01	0	0.02	0.01	0.01	0.01	0.03	0.07	0.01	0.07	0.06	0.07	0.05	0.12	0.1	0.06	0.16	0.05	0.13	0.02	0.08	0.24	0.39	0.17	0.1	0.21	0.12	0.14	0.8	0.74	0.59	0.34	0.43	0.37	0.19	0.21	0.25	0.25
68889	Ubac2	0.03	0.05	0.3	6	3	Cluster Enriched	0.353394	0.03	0.04	0	0.07	0.03	0	0.05	0.06	0	0.03	0.09	0.02	0.04	0.03	0	0.05	0.02	0.05	0	0	0	0	0.17	0.02	0.14	0.12	0.07	0.13	0.07	0	0.18	0.03	0.24	0.17	0.13	0.2	0.1	0	0.11	0.11	3.76
22601	Yap1	0.04	0.04	0.11	2.75	3	Cluster Enriched	0.0662425	0	0.06	0.31	0	0.05	0.08	0.05	0	0.12	0	0	0	0	0	0	0	0	0	0.09	0.09	0	0	0	0	0.13	0	0.14	0.11	0.12	0.16	0	0	0	0	0.27	0.1	0	0.19	0.12	0	0.26
56490	Zbtb20	0	0	0.06	Inf	3	Cluster Enriched	0.0118161	0	0	0	0	0	0	0	0	0	0	0	0	0	0	0	0	0	0	0	0	0	0	0	0	0	0	0	0	0	0	0	0	0	0	0	0	0.03	0.04	0.03	0.05	0.14
387524	Znrf2	0	0	0.03	Inf	3	Cluster Enriched	0.197672	0	0	0	0	0	0	0	0	0	0	0	0	0	0	0	0	0	0	0	0	0	0	0	0	0	0	0	0	0	0	0.11	0.11	0.28	0	0	0	0	0	0	0	0
68738	Acss1	1.3	1.98	0.45	2.88889			1.07e-06	0.58	0.61	0.87	1.85	0.75	0.63	1.74	1.27	0.98	1.41	1.74	1.25	2.02	2.16	1.57	1.96	1.56	2.18	2.18	2.32	0.99	2.12	2.35	1.23	3.17	2.36	1.35	1.72	1.52	0.7	2.07	0.77	0.76	0.14	0.46	0	0	0	0	0	0
56456	Actl6a	1.69	1.04	0.55	1.89091			9.26e-10	1.81	2.21	2.69	1.45	2.01	1.75	1.41	2	1.44	1.6	0.9	1.5	2.13	1.15	1.35	0.81	1.2	1.74	1.39	1.01	1	0.57	0.99	0.79	0.97	0.94	1.05	0.69	0.53	0.54	1.31	0.85	0.58	0.74	0.34	0.51	0.03	0.64	0.55	0.45	0.32
109711	Actn1	4.09	7.98	10.17	1.9511			3.93e-07	4.41	4.03	6.94	2.69	4.44	3.71	2.51	5.23	4.31	3.64	3.08	4.75	3.35	2.92	5.31	5.08	4.67	9.16	7.82	7.56	7.84	7.36	8.11	6.22	11.5	11.11	9.28	10.17	9.63	11.68	15.55	14.5	13.96	13.15	11.79	12.47	9.04	12.14	11.62	6.95	5.73
11564	Adsl	1.36	1.26	1.68	1.23529			0.0908845	0.78	1.61	2.69	1.85	1.41	1.56	1.24	1.8	1.87	1	0.79	1.37	0.73	0.6	1.16	1.19	0.88	1.62	1.03	1.17	1.54	0.96	1.86	1.46	1.32	0.89	1.22	1.5	1.39	2.03	3.17	1.69	1.42	1.28	1.26	2.13	1.4	2.56	2.21	1.68	1.66
83397	Akap12	0.11	0.13	0.07	1.57143			0.10834	0.12	0.1	0.18	0.11	0.07	0.19	0.17	0.07	0.16	0.09	0.15	0.09	0.01	0.1	0.09	0.12	0.14	0.15	0.03	0.09	0.1	0.1	0.15	0.14	0.24	0.18	0.1	0.15	0.23	0.03	0.16	0.24	0.09	0.06	0.21	0.02	0.09	0	0.03	0	0
14187	Akr1b8	0.23	4.58	3.19	13.8696			0.0067677	0.09	0.02	0	0.17	0	0.25	0.17	0.4	0.57	0.12	0.26	0.54	0.14	0.14	0.62	0	0.17	1.73	0.91	2.84	1.83	2.69	9.74	6.92	10.26	4.5	13.4	3.63	4.33	10.86	6.86	9.5	8.56	4.51	2.53	2.44	0.72	1.4	1.5	0	0.07
27384	Akr1c13	0.91	6.03	11.14	6.62637			7.33e-09	0.24	0.14	0.29	0.66	0.46	0.3	0.65	1.23	1.22	1.19	1.26	1.23	1.01	0.69	3.01	1.99	2.22	4.89	2.99	5.92	3.02	6.61	8.21	3.92	19.08	8.84	4.61	6.89	5.11	6.28	8.03	11.83	8.4	11.36	8.21	8.55	8.43	15.71	13.87	15.46	12.64
21681	Alyref	3.68	2.48	1.94	1.48387			0.0749706	10.25	8.59	8.29	4.11	1.83	3.45	3.35	1.54	1.96	1.88	1.7	1.72	2.64	3.32	0.63	1.23	1.2	2.49	2.67	3.21	1.17	3.43	5.65	1.15	2.75	3.18	1.64	3.64	1.24	1.67	2.83	3.5	0.88	2.33	3.34	2.04	4.09	1.06	2.14	1.51	1.74
67628	Anp32b	18.54	15.69	13.22	1.18164			0.342272	20.66	17.22	33.3	19.55	18.11	16.57	16.16	17.06	14.11	13.21	11.86	27.13	23.44	12.7	16.99	13.87	11.67	18.85	11.94	22.65	16.57	12.05	13.52	9.87	35.85	10.1	11.33	45.4	8.02	13.96	16.95	13.09	8.34	12.38	7.13	12.57	42.1	6.36	4.94	29.47	6.49
54519	Apbb1ip	0.26	0.17	0.05	3.4			2.24e-06	0.13	0.15	0.31	0.3	0.27	0.33	0.45	0.27	0.33	0.11	0.29	0.18	0.19	0.31	0.26	0.13	0.1	0.09	0.16	0.15	0.24	0.09	0.14	0.16	0.18	0.34	0.26	0.08	0	0.38	0.09	0.14	0.21	0	0	0	0	0	0	0	0
232201	Arhgap25	0	0.03	0.02	Inf			0.189069	0	0	0	0	0	0	0	0.01	0.02	0	0	0	0.02	0	0.02	0	0	0	0.03	0.06	0	0.03	0.08	0.03	0.08	0.03	0.06	0.03	0.01	0.03	0	0.22	0.02	0	0	0	0	0	0	0	0
11857	Arhgdib	1.84	3.19	1.63	1.7337			0.0311649	1.13	1	2.2	1.51	1.05	1.26	1.7	3.34	2.7	2.21	1.48	1.77	1.33	1.46	3.51	1.05	2.53	4.24	2.02	6.81	2.75	2.93	3.1	3.67	2.55	4.42	2.18	2.4	2.85	4.2	2.22	6.54	3.99	1.75	1.57	1.54	0.57	0.65	0.99	0	0
23806	Arih1	0.28	0.3	0.28	1.07143			0.79611	0.28	0.28	0.59	0.29	0.4	0.14	0.33	0.27	0.15	0.33	0.21	0.21	0.25	0.21	0.2	0.31	0.17	0.36	0.28	0.18	0.16	0.22	0.36	0.26	0.48	0.41	0.43	0.27	0.34	0.3	0.46	0.43	0.45	0.25	0.32	0.11	0.27	0.24	0.19	0.34	0.12
72567	Bclaf1	0.47	0.37	0.18	2.05556			0.000246887	0.39	0.45	0.97	0.45	0.75	0.82	0.27	0.48	0.47	0.22	0.34	0.4	0.4	0.31	0.28	0.17	0.38	0.41	0.27	0.54	0.41	0.18	0.52	0.27	0.6	0.36	0.36	0.17	0.32	0.1	0.18	0.3	0.49	0.23	0.52	0	0.12	0.12	0.19	0	0.06
12111	Bgn	0.12	0.63	0.81	5.25			2.94e-05	0	0	0	0.09	0.04	0.08	0.14	0.17	0.13	0.08	0.1	0.75	0	0.05	0.19	0.19	1.7	0.25	0.64	0.39	0.22	0.4	0.33	0.66	0.99	0.98	0.86	1.07	0.89	0.77	0.85	0.99	1.35	1.42	0.82	1.68	0.32	1.04	0.67	0.37	0.33
109624	Cald1	0.88	1.79	3.53	2.03409			4.88e-06	0.43	0.58	1.34	0.33	0.89	1.74	0.41	1.34	1.17	0.53	0.64	0.79	0.49	0.49	1.98	0.58	0.73	2.75	1.35	1.97	2.51	1.16	1.06	2.56	2.62	2.55	1.67	2.03	3.72	6.73	2.43	3.3	5.29	2.02	4.94	5.8	1.58	6.04	5.45	1.21	1.24
12321	Calu	4.8	10.01	10.56	2.08542			0.00198422	3.42	3.49	7.21	4.32	5.06	5.74	2.95	6.71	6.15	4.82	4.7	4.7	4.47	3.25	5.02	5.31	5.46	13.67	11.52	11.45	12.86	6.8	10.23	9.19	11.78	13.14	8.73	10.15	11.5	17.51	12.75	23.22	16.43	20.95	13.86	12.3	8.01	8.54	10.95	3.55	5.52
108058	Camk2d	0.02	0.08	0.13	4			0.00531471	0	0	0	0.03	0.02	0.02	0.02	0.04	0.03	0.02	0.03	0.04	0.02	0.02	0.02	0	0.04	0.05	0.26	0.08	0	0.05	0.06	0.08	0.1	0.11	0.15	0.52	0.12	0.14	0.15	0.26	0.26	0.14	0.15	0.13	0.11	0.18	0.08	0	0
12338	Capn6	0.07	0.1	0.17	1.7			0.561109	0.15	0.21	0.03	0.06	0.12	0.02	0.05	0.05	0.03	0.15	0.03	0.01	0.06	0.02	0.01	0.05	0.03	0.03	0.05	0.1	0	0	0.14	0.03	0.61	0.08	0.1	0.12	0.65	0.01	1.33	0.88	0.03	0	0	0	0	0	0	0	0
71941	Cars2	0.03	0.06	0.04	1.5			0.696565	0	0	0	0	0	0	0	0	0	0.01	0	0.4	0	0	0	0.13	0.01	0	0	0.01	0.08	0	0	0	0.3	0	0.14	0	0	0	0	0	0	0.04	0	0.04	0.06	0	0.15	0.13	0.05
12362	Casp1	0.01	0.02	0.02	2			0.62235	0	0	0	0	0	0	0	0	0	0.01	0	0.1	0	0	0	0	0	0	0.03	0.04	0	0	0	0	0	0.19	0.02	0	0.05	0.17	0.04	0	0.06	0	0	0	0	0	0	0	0
12461	Cct2	22.32	26	18.03	1.16487			0.228581	30.49	18.59	45.71	23.15	27.47	25.92	18.55	17.21	22.92	17.68	14.46	18.17	18.96	16.38	19.14	49.16	15.09	24.51	11.86	31.28	17.06	18.54	20.33	20.13	59.83	22.24	21.95	12.98	13.12	21.06	55.02	15.44	14.79	11.89	7.9	13.09	36.55	18.26	15.8	10.88	32.6
71702	Cdc5l	0.6	0.49	0.42	1.22449			0.222956	0.96	0.85	0.95	0.63	0.59	0.48	0.55	0.44	0.6	0.5	0.57	0.51	0.43	0.64	0.31	0.4	0.44	0.43	0.37	0.42	0.19	0.28	0.64	0.36	0.76	1.04	0.53	0.41	0.76	0.45	0.64	1.12	1.12	0.56	0.75	0.48	0.17	0.34	0.16	0.19	0.05
12566	Cdk2	0.46	0.28	0.04	7			4.04e-07	0.43	0.38	1.29	0.41	0.41	0.5	0.48	0.35	0.39	0.26	0.21	0.65	0.42	0.39	0.38	0.29	0.4	0.35	0.28	0.24	0.65	0.17	0.13	0.11	0.18	0.31	0.19	0.08	0.32	0.24	0	0	0	0	0	0	0	0	0	0	0
216197	Ckap4	0.69	1.1	0.93	1.1828			0.266182	0.49	0.43	1.31	0.58	0.54	0.41	0.56	1.12	0.7	0.73	0.55	0.65	0.94	0.36	0.91	0.8	0.77	1.52	0.66	0.95	0.77	0.44	1.26	0.91	2.55	1.49	1.12	0.87	2.31	2.92	0.71	0.97	1.39	0.92	1.68	0.51	0.37	1.13	1.74	0.1	0.16
12816	Col12a1	0	0.05	0.05	Inf			0.149679	0	0	0	0	0	0	0	0	0	0	0	0	0	0	0	0	0	0	0.03	0.07	0	0.04	0.08	0.07	0.14	0.09	0.06	0.01	0.4	0.16	0.06	0.26	0.06	0	0	0	0	0	0	0	0
12843	Col1a2	0.15	0.41	0.77	2.73333			0.000891118	0.01	0.02	0.16	0.13	0.17	0.14	0.2	0.18	0.14	0.45	0.23	0.13	0	0.08	0.21	0.88	0.39	0.28	0.23	0.44	0.59	0.14	0.49	0.31	0.32	0.35	0.46	0.34	0.7	0.59	0.51	1.76	1.27	1.14	1.11	2.35	0.03	0.92	1.07	0.07	0.27
12825	Col3a1	0.01	0	0.01	Inf			0.248766	0.04	0	0.03	0	0	0	0	0.01	0.01	0	0	0	0	0	0	0	0	0	0	0	0	0	0	0	0	0	0	0	0	0	0	0.01	0.08	0.07	0	0.09	0	0	0	0	0
12826	Col4a1	0.02	0.21	0.27	10.5			0.000194512	0	0.04	0.03	0.02	0.02	0.01	0.03	0.08	0.02	0	0	0	0	0	0	0.08	0.07	0.07	0	0.14	0.09	0.17	0.27	0.3	0.54	0.46	0.35	0.35	0.38	0.32	0.58	0.67	0.35	0.22	0.19	0.53	0.13	0.21	0.18	0.36	0.12
12827	Col4a2	0.01	0.13	0.15	13			0.000481034	0	0.01	0.03	0.01	0.02	0	0	0	0	0	0	0	0.01	0.01	0	0.02	0.05	0.07	0.04	0.06	0.02	0	0.18	0.28	0.3	0.3	0.23	0.2	0.03	0.17	0.32	0.23	0.45	0.1	0.11	0.17	0.07	0.15	0.16	0.08	0.14
12833	Col6a1	0.28	0.93	1.41	3.32143			4.22e-05	0.1	0.06	0.05	0.13	0.1	0.07	0.08	0.54	0.37	0.08	0.17	0.48	0.16	0.04	1.75	0.31	0.36	0.4	0.52	1.31	0.89	0.64	1.6	0.67	1.45	1.65	1.36	1.15	1.37	1.03	2.82	2.68	2.72	1.43	1.39	1.49	0.98	0.8	0.6	0.86	0.52
12834	Col6a2	0.15	0.59	0.52	3.46667			0.0216797	0	0	0	0.02	0.04	0	0.07	0.16	0.06	0.04	0.06	1.34	0.08	0	0.43	0.06	0.12	1.81	0.13	0.33	0.18	1.48	0.27	0.93	0.7	0.4	0.68	0.35	0.41	0.5	1.09	0.81	1.41	0.33	0.36	0.27	0.56	0.5	0.31	0.39	0.4
12835	Col6a3	0.09	0.51	0.81	5.66667			6.9e-09	0.07	0.11	0.04	0.03	0.12	0.07	0.09	0.14	0.16	0.08	0.11	0.11	0.1	0.07	0.12	0.14	0.24	0.31	0.28	0.41	0.25	0.39	0.83	0.69	1.07	0.8	0.73	0.68	0.66	0.67	1.51	1.38	1.11	0.89	0.61	0.49	0.34	1.01	0.7	0.73	0.81
12721	Coro1a	1.75	3.45	1.59	1.97143			0.000692327	1.39	1.63	2.62	1.02	1.23	1.52	1.38	2.29	2.12	1.77	1.56	2.01	1.5	1.59	2.64	2.09	3.44	2.15	3.59	4.67	3.79	2.64	2.37	2.37	5.58	5.83	2.87	4.22	2.88	2.55	2.95	4.89	2.42	1.11	1.99	1.01	0.71	1.3	1.31	0.27	0.12
56693	Crtap	0.07	0.14	0.04	1.75			0.0633152	0.13	0.07	0.04	0.04	0.11	0.07	0.04	0.1	0.03	0.06	0	0.12	0.05	0	0.17	0.13	0.03	0.25	0.17	0.11	0.27	0	0.57	0.09	0	0	0	0.12	0.05	0.09	0	0.1	0.21	0	0.05	0.08	0	0	0	0	0
229663	Csde1	2.22	1.52	2.28	1.02703			0.298005	5.46	1.23	3.14	3.14	2.76	2.96	2.24	1.21	1.61	1.77	1.44	1.25	2.75	1.46	0.83	1.59	1.75	1.06	0.49	0.88	0.87	0.83	3.25	0.59	1.43	4.75	0.72	3.9	2.91	0.83	1.47	5.28	2.7	4.16	0.93	2.25	3.85	1.02	2.93	0.9	1.26
13043	Cttn	0.77	1.17	1.99	1.51948			1.38e-07	0.56	0.48	1.6	0.56	0.86	0.78	0.59	1.01	1.08	0.46	0.61	1.27	0.26	0.39	1.1	0.26	0.76	1.71	1.22	0.71	1.66	0.89	1.33	1.17	0.91	2.11	1.28	1.65	1.67	2.44	2.61	2.36	3.1	2.01	2.08	2.68	1.58	1.4	1.8	2.28	1.67
66965	Ctu2	0.04	0.02	0.02	2			0.302445	0.02	0.05	0.11	0.04	0.06	0.02	0.01	0.02	0.09	0.02	0.02	0.01	0.03	0.01	0.02	0.07	0	0.02	0.03	0.02	0.02	0	0	0	0	0.04	0.08	0	0	0	0.02	0.1	0.05	0	0	0	0.02	0.09	0.04	0	0
56320	Dbn1	0.19	0.11	0.04	2.75			0.00676129	0.18	0.14	0.74	0.15	0.14	0.47	0.08	0.1	0.1	0.12	0.17	0.19	0.09	0.08	0.13	0.02	0.06	0.17	0.11	0.07	0.13	0.07	0.17	0.06	0.12	0.21	0.13	0.11	0.14	0.17	0.12	0.19	0.07	0	0	0	0	0	0	0	0
13194	Ddb1	2.31	1.88	2.15	1.07442			0.29641	2.45	2.11	4.46	2.7	2.68	2.5	1.99	1.61	1.55	2.73	1.57	1.92	2.42	1.89	2.04	2	1.97	1.65	1.39	1.5	1.58	1.24	2.27	1.66	3.48	2.16	1.62	1.4	1.68	2.58	2.56	2.75	2.76	2.36	2.1	3.53	1.92	2.84	2.44	1.59	1.6
68278	Ddx39	7.85	6.48	4.6	1.21142			0.000277199	10.31	10.06	12.72	8.29	10.88	8.94	7.9	6.41	6.19	7.07	5.3	5.87	7.09	6.51	4.24	7.41	5.55	6.39	6.47	6.44	4.96	5.99	7.6	4.48	7.89	9	5.58	6.54	5.07	5.82	8.86	7.65	4.91	5.33	5.41	4.48	4.72	4.24	4.28	3.72	2.94
72662	Dis3	0.32	0.21	0.11	1.90909			0.00362977	0.21	0.96	0.24	0.31	0.49	0.29	0.26	0.26	0.44	0.09	0.17	0.29	0.25	0.31	0.28	0.13	0.21	0.27	0.1	0.09	0.14	0.18	0.34	0.14	0.53	0.24	0.15	0.09	0.07	0.14	0.51	0.24	0.25	0.07	0.17	0.13	0.09	0.1	0.08	0.02	0
245474	Dkc1	0.79	0.64	0.67	1.1791			0.374605	0.53	1.01	1.31	1.36	0.63	1.17	1.09	0.61	0.71	0.3	0.59	0.82	0.26	0.69	0.75	0.36	0.44	0.87	0.3	0.46	0.78	0.4	0.62	0.49	1.37	0.79	0.74	0.96	0.7	0.6	0.71	0.95	0.93	0.37	0.97	0.56	0.58	0.48	0.5	0.73	0.39
13429	Dnm1	0.12	0.13	0.19	1.46154			0.203003	0.11	0	0.26	0.12	0.14	0.17	0.13	0.19	0.18	0.11	0.07	0	0.18	0	0.16	0	0	0	0	0	0	0.17	0.32	0.21	0.23	0.33	0.27	0	0	0	0.31	0.33	0.33	0.33	0.37	0.24	0.21	0.21	0.19	0.2	0.17
94176	Dock2	0.02	0.06	0.03	2			0.0547151	0	0	0	0	0	0	0.04	0.02	0.03	0.04	0.03	0.03	0.06	0.04	0.05	0.03	0.07	0.04	0.05	0.04	0.02	0.05	0.11	0.03	0.1	0.07	0.1	0.05	0.11	0.14	0.05	0.1	0.09	0	0	0	0	0	0	0	0
76088	Dock8	0.02	0.03	0.01	2			0.00739462	0	0.01	0.07	0.01	0.03	0.01	0.04	0.02	0.01	0.01	0.01	0.03	0.03	0.01	0.04	0.01	0.03	0.02	0.04	0.02	0.02	0.03	0.01	0.05	0.04	0.05	0.04	0.03	0.01	0.04	0.05	0.02	0.01	0	0	0	0	0	0	0	0
21915	Dtymk	2.44	1.49	1.65	1.47879			0.076759	2.05	1.23	3.78	2.42	2.53	2.04	3.83	5.52	2.22	1.28	1.57	3.25	1.52	1.21	2.21	1.39	0.77	1.23	0.76	1.24	1.39	0.67	1.32	1.56	1.7	4.07	1.72	1.61	1.96	3.25	1.31	3.79	2.54	2.82	3.23	2.1	1.43	1.07	1.39	0.52	0.62
13587	Ear2	0.13	0.19	0.19	1.46154			0.816034	0	0	0	0	0	0	0.41	0.77	0.19	0	0	0	0	0.14	0.42	0.15	0.49	0.37	0	0	0	0.27	0.57	0.43	0	0	0	0.96	0.46	1.08	0	0	0	0	0.31	0.58	0	0	0	0	0
55949	Eef1b2	38.05	35.24	33.87	1.07974			0.5807	37.42	50	74.46	31.52	46.56	52.28	31.89	31.61	35.98	24.69	26.64	41.59	36.76	25.87	23.55	23.46	30.82	31.67	28.54	33.36	30.04	27.17	48.64	25.71	54.94	45.41	43.07	42.82	19.96	34.68	40.15	58.18	39.92	38.87	41.8	33.44	34.41	31.72	28.21	32.82	26.87
20624	Eftud2	2.61	2.16	2.24	1.16518			0.664534	1.95	2.7	3.45	2.19	4.91	2.23	2.29	4.61	4.38	1.29	1.14	1.6	2.09	2.03	2.33	2.07	1.01	1.32	2.17	1.73	4.04	1.38	2.65	3.95	1.96	2.27	1.38	2.24	1.37	6.88	2.51	1.48	4.68	2.44	2.23	0.92	1.33	3.58	4.32	0.93	0.38
259300	Ehd2	0.05	0.15	0.19	3			0.176978	0	0	0	0	0.13	0.08	0.17	0.14	0.17	0	0	0	0	0	0	0	0	0	0	0	0	0.16	1.07	0.13	0.2	0	0.27	0.33	0.36	0.13	0.28	0.92	0.12	0.21	0.18	0.1	0.16	0.1	0	0.12	0.14
98878	Ehd4	0.37	0.63	0.45	1.4			0.0258446	0.37	0.23	0.84	0.26	0.26	0.31	0.26	0.49	0.42	0.29	0.29	0.5	0.37	0.25	0.36	0.32	0.39	0.52	0.42	0.54	0.33	0.44	1.45	0.77	0.71	0.65	1.02	0.73	0.56	0.54	0.58	0.64	0.62	0.75	0.62	0.44	0.21	0.29	0.46	0.27	0.37
55944	Eif3d	4.38	3.31	3.04	1.32326			0.010119	6.84	3.24	7.04	4.83	3.48	5.4	4.87	3.41	4.24	4.38	2.99	3.17	3.42	4.2	4.14	2.74	1.59	3.71	3.17	3.45	2.8	2.58	4.41	3.07	4.82	5.1	2.3	4.12	3.07	4.74	5.45	5.03	2.97	2.64	2.93	2.73	2.88	2.17	2.2	2.93	2.31
13877	Erh	9.71	9.67	4.21	2.29691			0.00285783	9.65	21.66	12.75	5.39	6.53	9.71	4.51	6.11	5.91	14.51	10.54	8.36	11.28	10.21	8.46	15.55	13.05	6.64	3.89	4.66	8.94	8.4	4.23	6.38	27.79	12.68	3.86	4.85	5.94	7.23	5.36	7.15	4.89	4.43	6.76	4.87	0	4.2	3.58	3.4	2.85
244373	Erlin2	0.75	1.81	1.62	2.16			0.00011302	0.5	0.4	1.1	0.56	0.46	0.54	0.79	0.85	0.74	0.85	0.7	1	0.98	0.55	1.28	0.88	1.02	2.61	1.38	1.59	2.87	1.43	1.87	1.22	2.42	2.06	2.4	2.16	1.97	2.08	1.81	2.53	2.04	2.28	2.53	2.7	1.03	1.69	1.48	0.79	1.05
52635	Esyt2	0.26	0.23	0.19	1.13043			0.593988	0.12	0.18	0.11	0.11	0.26	0.04	0.3	1.31	0.22	0.15	0.19	0.29	0.15	0.28	0.18	0.16	0.16	0.58	0.35	0.25	0.19	0.14	0.09	0.09	0.18	0.26	0.31	0.28	0.35	0.23	0.21	0.18	0.21	0.21	0.27	0.17	0.09	0.17	0.3	0.15	0.11
14020	Evi5	0.04	0.12	0.23	3			0.0612265	0	0	0	0.23	0.02	0.03	0.18	0.03	0.05	0.01	0	0.04	0	0	0	0	0.02	0.25	0	0	0	0.18	0	0.67	0.03	0.05	0.18	0.3	0.38	0.03	0.43	0.02	1.21	0.06	0.19	0.12	0.04	0.23	0	0.07	0.13
14030	Ewsr1	2.93	2.5	1.44	1.73611			2.73e-05	2.63	3.19	5.13	2.95	3.72	3.9	2.98	2.54	2.79	3.37	1.31	2.77	2.3	2.82	1.59	2.39	2.29	2.46	1.67	2.25	2.06	3.02	2.57	2.59	2.76	4.43	1.49	1.74	1.41	1.42	2.17	2.68	0.88	0.69	2.26	2.62	1.48	2.03	1.3	1.03	0.87
107371	Exoc6	0.05	0.03	0.02	1.66667			0.0251528	0.04	0.03	0.06	0.15	0.08	0.04	0.04	0.09	0.04	0.01	0.03	0.08	0.04	0.02	0.03	0.01	0.01	0.03	0.01	0.02	0	0	0.05	0.02	0.01	0.11	0.04	0	0.02	0.03	0.01	0.08	0.06	0.04	0.02	0.03	0	0	0	0	0
23874	Farsb	2.55	2.22	2.86	1.12157			0.0322338	2.11	2.8	4.09	3.05	3.3	3.15	2.33	2.21	2.24	1.76	2.1	2.37	2.54	2.15	2.06	2.03	1.56	2.86	1.7	2.41	1.85	1.3	2.25	1.81	3.03	3.32	2.56	2.44	2.71	2.73	3.01	3.5	2.4	3.21	3.43	2.55	2.37	3.53	3.93	2.16	2.42
14115	Fbln2	0.01	0.03	0.03	3			0.337281	0.01	0.02	0.08	0.01	0.01	0.01	0	0.01	0.01	0	0.01	0.01	0	0	0	0	0	0	0.01	0	0.12	0.01	0.07	0.04	0.05	0.06	0.04	0.04	0.12	0.13	0.05	0.08	0.19	0	0	0	0	0	0	0	0
14118	Fbn1	0.01	0.08	0.15	8			0.159282	0.04	0.06	0.02	0	0.01	0.01	0	0	0	0.01	0.01	0	0	0	0	0.01	0.01	0.01	0.01	0.04	0.02	0.05	0.02	0.02	0.13	0.57	0.06	0.27	0.04	0.04	0.36	0.34	0.23	0.18	1.12	0.14	0.01	0.02	0.01	0	0
108101	Fermt3	1.78	1.91	0.63	2.8254			3.77e-07	1.51	1.4	3.02	2.08	1.82	1.54	1.5	2.09	1.79	1.31	1.17	2.42	1.44	1.87	1.79	2.02	1.92	1.55	1.9	1.91	2.11	1.5	2.24	1.8	2.61	1.61	1.77	2.11	1.52	1.1	1.92	1.53	1.05	0.28	0.83	0.18	0.1	0.1	0.05	0.07	0
14230	Fkbp10	0.15	0.16	0.18	1.125			0.872046	0.18	0.06	0.31	0.25	0.08	0.23	0.17	0.2	0.17	0.07	0.08	0.15	0.07	0.16	0.06	0.1	0.09	0.06	0.05	0.38	0.16	0.09	0.31	0.21	0.21	0.05	0.24	0.13	0.19	0.29	0.11	0.69	0.74	0.72	0.24	0.2	0	0	0	0	0
27055	Fkbp9	0.42	0.28	0.16	1.75			0.0340027	0.22	0.21	0.48	0.27	0.59	1.35	0.27	0.3	0.76	0.1	0.1	0.71	0.46	0.04	0.4	0.35	0.1	0.52	0.09	0.18	0.46	0.71	0.19	0.19	0.18	0.12	0.24	0.46	0.26	0.28	0.47	0.44	0.34	0.31	0.31	0	0	0	0	0	0
192176	Flna	1.78	2.53	1.58	1.42135			0.0327403	1.46	1.8	3.63	1.53	1.88	2.17	1.38	1.96	1.87	1.01	1.17	2.1	1.19	1.09	2.41	1.38	1.61	3.1	2.1	2.51	2.52	2.06	2.72	2.92	3.44	3.24	2.71	2.5	3.22	3.28	2.12	3.13	3.16	1.74	2.37	1.65	0.76	0.93	0.63	0.47	0.37
14268	Fn1	2.26	7.67	4.68	2.0708			0.000271747	2.11	2.17	3.07	1.75	1.97	2.32	1.56	2.61	2.33	1.86	1.91	2.52	2.16	1.47	4.15	2.28	2.88	11.63	11.02	12.22	8.38	6.98	8.4	5.65	8.58	8.51	5.55	10.16	6.52	10.14	9.11	11.9	7.86	5.16	4.04	4.19	2.15	2.24	2.6	1.91	1.49
20321	Frrs1	0.03	0.02	0.02	1.5			0.771427	0.02	0	0.02	0	0	0	0.13	0.01	0	0.02	0.04	0.02	0.03	0.12	0	0.09	0	0.07	0.05	0	0.06	0	0	0	0	0	0	0	0	0	0	0	0	0	0	0	0.17	0	0.12	0	0
14086	Fscn1	1.34	1.23	0.58	2.12069			0.00137673	1.21	1.09	3.68	0.88	1.96	1.65	0.7	1.37	0.97	0.91	1.46	1.16	0.82	0.95	1.23	1.04	2.19	1.38	1.19	1.26	1.06	0.83	2.24	0.59	1.23	0.86	0.87	1.09	0.95	0.67	0.85	1.03	0.77	0.93	1.13	0.72	0.46	0.47	0.53	0.3	0.06
67305	Gpx7	0.24	0.75	0.75	3.125			0.105122	0	0	0	0.25	0.51	0.23	0.11	0.53	0.33	0.35	0	0.4	0.32	0.17	0.34	0.57	0.24	0.94	1.24	1.31	0.44	0.65	0	0.51	1.55	0.98	0.55	0	3.12	1.34	0	1.22	1.15	2.84	1.77	0.93	0.4	0.44	0.28	0	0
14783	Grb10	0.89	1.49	0.33	2.69697			0.000225709	0.85	1.09	1.09	0.89	1.05	0.63	0.68	1	0.7	0.51	0.94	0.91	0.73	0.72	1.59	0.74	1.01	4.15	2.07	2.24	2	1.07	0.76	0.43	1.19	1.43	0.81	1.12	1.44	1.2	0.37	0.79	1	0	0	0	0	0	0	0	0
107435	Hat1	1.37	0.93	0.4	2.325			0.0230472	0.62	2.17	2.89	1.42	2.25	2.19	1.28	1.57	1.22	1.03	0.42	1.88	0.57	0.81	0.28	0.71	0.41	0.91	0.24	0.52	0.26	0.32	0.17	1.43	2.95	0.52	2.76	0.73	3.03	0.09	0.01	0	0.18	2.86	0.15	0.09	0	0	0	0	0
15163	Hcls1	0.46	0.72	0.6	1.2			0.545871	0.13	0.3	0.56	1.9	0.27	0.26	0.38	0.72	0.55	0.46	0.12	0.43	0.38	0.13	0.33	0.24	0.37	0.67	1.44	0.61	0.8	0.64	0.44	0.97	0.67	0.98	0.75	1.02	0.53	2.57	0.74	1.84	1.88	0.68	0.46	0.22	0	0.2	0.45	0.03	0.03
433759	Hdac1	1.25	0.82	0.59	1.52439			3.54e-05	1.41	1.47	2.38	1.38	1.61	1.42	0.89	1.41	1.07	0.94	0.68	1.3	0.99	1.06	0.78	1.23	0.59	1.02	0.74	0.85	0.41	0.74	0.82	0.55	1.22	0.89	0.82	0.76	0.97	0.58	0.59	0.2	0.62	1.35	0.61	0.82	0.73	0.6	0.36	0.33	0.12
97165	Hmgb2	67.89	120.22	27.98	2.42638			0.104453	336.36	86.35	100.14	29.56	57.4	36.98	19.38	56.76	40.34	60.91	36.87	45.3	18.41	40.97	52.62	180.84	37.7	37.86	17.38	60.9	29.9	58.22	631.27	240.77	44.8	53.65	49.33	54.94	147.75	146.39	16.35	38.33	19.1	9.7	33.67	10.26	4.54	7.6	9.14	1.71	0.76
15384	Hnrnpab	14.56	12.77	8.47	1.50767			0.000652581	20.54	21.26	21.01	18.32	13.2	22.7	10.66	12.34	12.45	11.94	10.04	8.27	11.5	12.62	11.51	11.78	13.15	12.34	10.29	11.5	8.72	8.85	17.58	9.61	17.4	17.6	14.44	11.72	7.5	13.34	11.39	16.31	10.18	8	10.8	11.41	6.03	8.21	8.23	6.39	7.3
98758	Hnrnpf	35.77	24.16	18.08	1.48055			1.66e-05	51.92	34.19	57.97	23.63	40.35	40.62	36.48	32.58	38.94	30.68	26.43	29.56	49.21	23.58	20.38	23.25	22.32	32.47	24.71	24.1	20.58	22.58	27.47	14.3	20.95	27.82	29.31	35.11	18.23	17.53	33.06	29.26	12.76	30.12	19.84	18	16.44	14.3	17.86	9.68	16.54
51810	Hnrnpu	20.43	23.59	20.07	1.15467			0.494739	30.18	25.87	33.49	16.8	23.3	24.31	19.35	17.72	17.24	15.81	16.44	15.3	17.82	17.65	15.19	13.99	12.87	45.27	24.81	16.27	18.45	19.12	27.57	16.13	36.67	28.09	23.84	22.66	21.42	22.98	38.71	20.9	30.19	16.73	28.66	21.49	17	25.45	17.27	13.79	7.58
72692	Hnrpll	1.08	1.05	0.83	1.02857			0.285707	1.41	0.91	1.1	0.59	1.43	0.97	0.66	1.16	0.87	1.66	1.27	0.86	1.22	1.46	0.67	0.89	0.51	0.93	1.08	3.03	0.64	0.66	0.74	0.64	1.7	1.03	0.8	1.42	0.89	0.56	1.21	0.69	1.21	0.75	1.19	0.54	1.13	0.51	0.67	0.86	1.56
15530	Hspg2	0.33	0.8	0.69	2.09091			9.77e-05	0.11	0.11	0.28	0.14	0.73	0.43	0.49	0.72	0.58	0.25	0.16	0.22	0.22	0.15	0.29	0.28	0.39	0.77	0.54	1.21	0.55	0.62	1.1	0.92	1.26	1.16	0.78	0.65	0.51	0.65	0.92	1.31	0.99	0.82	0.4	0.47	0.57	0.7	0.71	0.77	0.55
15894	Icam1	0.06	0.16	0.3	2.66667			0.000101396	0.03	0	0.02	0	0	0	0.21	0.15	0.08	0	0.13	0.05	0.08	0.09	0.05	0.05	0.13	0.05	0.15	0.13	0.13	0.1	0.18	0.08	0.4	0.31	0.24	0.23	0.14	0.69	0.34	0.6	0.46	0.32	0.43	0.34	0.29	0.37	0.24	0.08	0.12
269951	Idh2	9.11	45.24	75.05	4.96597			4.96e-08	5.99	4.79	7.52	6.66	5.92	6.41	6.84	12.79	9.08	15.79	9.42	10.02	10.7	5.92	18.84	21.08	19.09	31.4	35.93	33.66	30.72	41.32	40.89	32.74	116.27	84.51	55.26	82.01	105.19	69.41	97.07	82.31	65.32	128.22	112.23	93.1	109.2	77.66	80.87	35.31	65.52
319765	Igf2bp2	0.58	0.8	0.37	1.56757			0.0217151	0.43	0.48	1.44	0.55	0.63	0.86	0.37	0.69	0.62	0.26	0.43	0.34	0.28	0.39	0.87	0.55	0.6	1.08	0.33	0.46	0.97	0.4	0.63	1.19	1.4	1.15	0.88	1.4	0.51	1.04	0.56	1.02	0.68	0.36	0.26	0.33	0.14	0.19	0.19	0	0
16170	Il16	0.01	0.06	0.03	3			0.0214624	0	0	0	0	0	0	0	0.06	0.02	0.02	0.01	0.02	0.01	0.01	0.04	0.01	0.02	0.04	0.13	0.11	0.04	0.04	0.06	0.07	0.01	0.05	0.08	0.07	0.11	0.14	0.04	0.05	0.07	0.03	0.04	0.05	0	0	0	0	0
16331	Inpp5d	0.08	0.06	0.03	2			0.0168429	0.02	0.02	0.11	0.02	0.09	0.06	0.03	0.1	0.09	0.21	0.09	0.22	0.06	0.06	0.09	0.04	0.07	0.09	0.03	0.03	0.12	0.02	0.03	0.05	0.06	0.1	0.08	0.02	0.14	0.13	0	0.14	0.05	0	0	0	0	0	0	0	0
16402	Itga5	0.26	0.28	0.23	1.07692			0.924227	0.1	0.15	2.06	0.11	0.1	0.1	0.14	0.1	0.07	0.18	0.1	0.18	0.17	0.12	0.27	0.2	0.2	0.23	0.24	0.29	0.12	0.09	0.33	0.18	0.85	0.29	0.31	0.39	0.47	0.29	0.26	0.47	0.42	0.17	0.15	0.1	0.19	0.16	0.05	0.47	0.06
16408	Itgal	0.02	0.11	0.13	5.5			0.222918	0.01	0.01	0	0	0	0	0.03	0.04	0.06	0.01	0.03	0.06	0.02	0.02	0.08	0.01	0.02	0.02	0.06	0.18	0.03	0.03	0.08	0.01	0.18	0.34	0.41	0.1	0.08	0.4	0.56	0.76	0.49	0	0	0	0	0	0	0	0
16549	Khsrp	6.6	5.85	4.65	1.12821			0.0348506	4.31	6.05	12.98	6.52	9.11	7.94	5.7	6.42	6.94	6.13	4.17	7.57	4.95	5.39	4.75	4.23	4.56	9.03	5.15	4.48	4.34	3.57	6.66	4.6	9.48	8.47	5.59	6.33	4.82	5.36	5.13	6.64	6.61	6.06	5.63	5.65	4.86	4.72	4.66	4.32	3.04
16564	Kif21a	0.01	0.1	0.12	10			0.00021895	0.02	0.02	0	0.01	0.01	0	0.01	0.02	0.02	0.03	0.01	0.02	0	0.01	0.01	0.01	0.02	0.05	0.03	0.03	0.03	0.03	0.19	0.08	0.22	0.16	0.3	0.13	0.07	0.12	0.11	0.12	0.2	0.04	0.06	0.11	0.1	0.18	0.15	0.13	0.02
16646	Kpna1	0.38	0.3	0.25	1.26667			0.519025	0.48	0.43	0.41	0.33	0.38	0.44	0.57	0.28	0.36	0.37	0.43	0.19	0.34	0.26	0.38	0.26	0.32	0.1	0.85	0.28	0.2	0.31	0.14	0.1	0.21	0.46	0.33	1.93	0.54	0.12	0.16	0.15	0.3	0.1	0.2	0.06	0.14	0	0.24	0	0
16648	Kpna3	1.05	0.72	0.86	1.22093			0.052012	1.25	1.27	1.92	1.31	1.29	1.18	0.99	0.98	0.9	0.53	0.76	0.88	1.06	0.95	0.53	0.96	0.54	0.67	0.86	0.72	0.89	0.34	1.19	0.41	0.89	0.61	0.52	0.75	0.7	0.75	0.67	1.05	0.71	1.15	0.9	0.86	0.54	1	1.11	1.92	0.35
110310	Krt7	0.46	0.56	0.85	1.51786			0.0741468	0.79	1.22	0.34	0.33	0.12	0.92	0.3	0.2	0.15	0.23	1.13	0.21	0.34	0.38	0.29	0.18	0.33	0.51	0.48	1.09	0.47	0.99	0.8	0.75	0.37	0.33	0.38	1.34	1.39	0.64	0.6	0.37	0.49	1.1	2.21	1.57	0.26	0.34	0.32	0	1.03
223917	Krt79	0.53	0.7	0.95	1.35714			0.0461608	0.43	1.29	0.37	0.71	0.18	1.34	0.6	0.25	0.26	0.46	0.62	0.28	0.27	0.44	0.43	0.09	0.4	0.58	0.83	1.11	0	1	0.72	0.73	0.41	2.19	0.29	1.42	1.33	1.04	1.45	0.57	0.67	0.78	1.36	1.55	0.34	0.78	1.2	0.17	1.12
16777	Lamb1	0.11	0.17	0.22	1.54545			0.313865	0.04	0.04	0.53	0.04	0.08	0.17	0.05	0.08	0.07	0.02	0.02	0.02	0.01	0.02	0.51	0.05	0.05	0.12	0.11	0.21	0.05	0.12	0.27	0.34	0.19	0.35	0.15	0.35	0.14	0.62	0.49	0.68	0.51	0.55	0.2	0.22	0.04	0.15	0.07	0	0
226519	Lamc1	0.11	0.38	0.37	3.36364			0.0175785	0.09	0.09	0.22	0.12	0.13	0.16	0.07	0.08	0.14	0.07	0.1	0.06	0.1	0.05	0.15	0.21	0.11	0.87	0.46	0.24	0.15	0.26	0.55	0.24	0.54	0.61	0.31	0.45	0.35	0.33	1.08	0.75	0.72	0.72	0.94	0.63	0.07	0.24	0.12	0.08	0.03
28036	Larp7	0.4	0.25	0.23	1.6			0.254299	0.85	0.44	0.95	0.3	0.27	0.56	0.53	0.14	0.28	0.63	0.19	0.13	0.28	0.31	0.15	0.08	0.17	0.1	0.29	0.27	0.09	0.13	0.19	1.21	0.16	0.16	0.18	0.17	0.06	0.39	0.11	0.21	1.21	0.43	0.29	0.09	0.05	0.05	0.15	0.65	0
16906	Lmnb1	7.94	7.77	5.79	1.02188			0.0256116	7.58	5.32	14.08	7.51	10.32	9.07	8.8	9.15	8.13	5.87	6.47	7.63	5.93	6.64	6.67	5.59	6.08	7.48	7.92	7.81	7.2	6.18	9.35	7.56	9.44	10.63	7.98	7.82	8.32	7.46	7.72	9.07	8.33	7.38	9.54	6.74	3.75	6.13	5.47	2.75	1.84
11426	Macf1	0.11	0.12	0.16	1.33333			0.172537	0.08	0.08	0.2	0.1	0.11	0.18	0.11	0.1	0.12	0.07	0.07	0.17	0.11	0.06	0.06	0.07	0.11	0.1	0.06	0.05	0.07	0.09	0.11	0.13	0.23	0.24	0.14	0.1	0.21	0.13	0.18	0.4	0.24	0.3	0.19	0.14	0.14	0.13	0.15	0.01	0.05
17149	Magoh	2.38	1.96	1.31	1.21429			0.0113103	2.97	2.91	5.47	2.35	2.43	3.31	2.17	2.85	1.97	1.38	1.63	1.76	1.99	1.19	1.31	1.38	1.95	1.51	1.63	3	1.03	1.51	2.99	1.84	2.29	2.9	1.43	1.3	2.22	2.62	1.14	2.67	2.59	1.54	1.7	2.3	0.52	1.01	1.15	0.8	0.79
67920	Mak16	0.28	0.18	0	Inf			5.25e-05	0.36	0.48	0	0.53	0.63	0.41	0.42	0.18	0.33	0.17	0.17	0	0.18	0.23	0.11	0	0.11	0.12	0	0.2	0.12	0.11	0.13	0.32	0.08	0.22	0.75	0	0	0	0	0	0	0	0	0	0	0	0	0	0
17218	Mcm5	2.93	2.21	1.05	2.10476			0.0842378	3.45	3.64	4.81	3.96	3.48	3.33	3.38	2.18	2.41	2.63	2.32	2.57	1.78	2.57	1.49	1.82	1.77	1.15	3.21	1.15	0.76	0.82	1.62	1.14	0.8	10.95	1.35	2.43	1.3	0.77	1.06	10.48	0.99	0.21	0.77	0.41	0.2	0.1	0.18	0	0
56307	Metap2	2.8	1.77	2.54	1.10236			0.186462	3.11	2.92	5.76	2.97	3.79	3.31	2.55	2.2	2.66	3.87	1.67	1.75	2.12	2.26	1.11	1.71	1.25	1.47	1.25	1.89	1.21	0.98	1.43	1.81	1.27	4.83	2.14	1.89	0.57	4.85	1.23	5.52	3.07	1.04	4.65	4.96	3.66	3.14	2.66	3.47	1.12
67973	Mphosph10	0.28	0.41	0	Inf			0.0282377	0.23	0.63	0.66	0.42	0.22	0.18	0.24	0.18	0.17	0.08	0.07	0.1	0.06	0.1	0.85	0.04	0.04	0.05	1.49	1.49	0	0	1.68	0.13	0	0	0	0	0	0	0	0	0	0	0	0	0	0	0	0	0
66902	Mtap	2.23	2.2	2.66	1.19283			0.488347	1.71	1.82	5.4	2.3	2.93	2.51	1.96	2.85	2.46	1.29	1.78	2.17	1.23	0.91	2.08	1.13	1.39	3.12	2.02	2.11	1.32	0.85	3.67	2.52	2.67	3.31	2.28	1.66	2.31	3.09	1.46	4.34	3.54	4.3	3.91	4.97	1.48	1.57	1.96	1.87	5.17
270685	Mthfd1l	1.71	1.66	1.22	1.03012			0.205659	1.76	1.61	3	1.51	2.07	2.11	1.75	1.68	1.78	1.13	1.22	1.51	1.75	1.4	1.43	1.04	1.21	2.37	1.21	1.39	1.07	1.13	2.25	1.73	2.06	2.33	2.09	1.5	2.12	2.54	2.36	2.58	2.35	1.69	2.72	1.89	0.17	0.99	0.93	0.18	0
246177	Myo1g	0.06	0.1	0.03	2			0.388854	0	0	0	0	0.01	0.04	0.04	0.06	0.03	0.01	0.01	0.4	0.01	0	0.34	0.01	0.05	0.02	0.04	0.73	0.05	0.01	0.04	0.03	0	0.13	0.06	0.06	0.15	0.04	0.03	0.15	0.05	0	0	0	0	0	0	0	0
17938	Naca	16.54	9.22	9.06	1.79393			0.000325437	30.43	14.14	31.88	15.61	23.56	20.11	11.64	14.72	16.29	10.46	10.77	12.39	15.68	12	8.44	11.14	6.96	12.65	4.98	5.75	5.63	6.04	9.87	10.46	10.59	13.13	13.43	6.81	3.92	10.55	10.9	11.64	11.84	10.3	6.75	12.22	14.5	15.58	10.41	7.37	6.69
17970	Ncf2	0.02	0.16	0.08	4			0.106155	0	0	0	0.02	0.01	0	0	0.08	0.07	0.02	0.03	0.14	0	0	0	0	0.01	0.2	0.19	0.36	0.59	0	0	0	0.1	0.07	0.44	0	0.24	0.56	0.02	0.12	0.47	0	0	0	0	0	0	0	0
50884	Nckap1	0.07	0.19	0.32	2.71429			0.108382	0.06	0.03	0.14	0.06	0.11	0.07	0.05	0.09	0.07	0.03	0.07	0.1	0.03	0.06	0.07	0.1	0.02	0.1	0.06	0.26	0.09	0.05	0.56	0.49	0.13	0.17	0.22	0.22	0.27	0.18	0.36	0.2	0.41	0.28	2.09	0.27	0.16	0.25	0.41	0.07	0.09
105855	Nckap1l	0.01	0.01	0.01	1			0.979258	0	0	0	0	0	0	0.06	0.03	0.01	0	0.03	0.02	0.01	0.01	0.01	0	0.01	0.03	0	0.03	0.02	0	0.01	0.01	0	0.02	0.03	0	0.05	0.02	0.05	0.01	0.05	0	0	0	0	0.01	0.03	0	0
17999	Nedd4	1.94	1.84	1.2	1.53333			0.0273557	1.75	2.11	3.57	2.94	2.27	2.42	2.1	1.58	2.05	1.2	1.38	1.69	1.36	1.37	1.32	1.42	1.26	2.32	1.38	2.02	1.17	0.99	2.36	1.55	3.33	2.84	1.5	2.4	1.69	2.15	2.4	2.98	1.83	0.96	1.36	1.32	0.62	0.46	0.68	0.44	0.37
18033	Nfkb1	0.03	0.22	0.13	4.33333			0.137319	0.04	0.01	0.02	0.12	0.04	0.01	0.01	0.02	0.02	0.01	0.02	0.02	0.02	0.01	0.05	0.01	0.21	0.73	0.08	0.06	0.4	0.05	0.04	0.45	0.04	0.52	0.06	0.05	0.02	0.08	0.07	0.1	0.12	0.02	0.37	1.25	0.03	0.02	0.02	0	0
18073	Nid1	0.07	0.28	0.15	2.14286			0.0101731	0.03	0.03	0.17	0.02	0.07	0.16	0.03	0.05	0.11	0.03	0.03	0.15	0.05	0.04	0.12	0.21	0.04	0.2	0.25	0.39	0.12	0.53	0.43	0.09	0.33	0.67	0.12	0.15	0.46	0.44	0.63	0.22	0.2	0.12	0.13	0.08	0.01	0.04	0	0.02	0.01
67824	Nmral1	1.42	1.32	1.3	1.07576			0.864736	0.74	1.01	2.6	1.28	1.93	1.6	1.3	1.43	2.11	0.8	1.19	1.45	1.78	0.97	1.16	1.35	1.35	2.1	0.5	1.19	0.79	1.06	1.57	0.89	1.66	1.73	1.64	1.98	1.3	2.42	3.44	1.49	1.8	1.46	1.36	1.48	1.22	1.59	1.29	0.45	0.37
67134	Nop56	1.28	1.58	1.36	1.16176			0.485427	1.57	2.83	2.01	2.46	0.72	0.83	1.65	0.7	0.55	0.73	1.18	0.73	0.95	1.52	0.8	1.07	0.82	0.96	1.43	1.67	0.77	1.23	2.56	1	2.31	1.85	3.35	1.46	1.26	0.85	1.71	1.87	2.03	1.56	1.42	0.84	1.28	1.74	1.84	1.06	0.72
55989	Nop58	1.43	1.28	1.38	1.03623			0.845635	1.21	2.37	3.69	2.15	1.41	1.95	1.29	1.18	0.89	0.49	0.89	0.89	0.77	1.27	0.96	0.66	0.67	1.45	0.85	1.12	0.78	1.07	1.91	1.06	2.98	1.39	1.41	1.86	1.27	1.17	1.73	1.47	2.38	1.35	0.85	1.55	0.83	1.79	1.46	1.66	0.98
50773	Nt5c	1.12	1.44	2.43	1.6875			0.0273936	0.72	0.26	1.45	0.94	1.72	0.92	1.08	3.95	0.46	0.95	0.62	0.81	1.36	0.31	1.18	1.09	0.86	1.18	1.25	1.31	0	0.41	2.4	1.49	2.87	2.53	1.88	2.18	0.93	2.16	6.12	5.15	3.55	2.5	0.45	1.83	4.12	5.04	1.33	0.79	0.79
234865	Nup133	0.7	0.38	0.57	1.22807			0.351981	0.67	0.35	1.24	0.46	0.94	0.83	0.43	1.56	1.52	0.44	0.41	0.45	0.56	0.25	0.42	0.32	0.48	0.67	0.12	0.14	0.3	0.45	0.47	1.03	0.42	0.12	0.09	0.47	0.16	1.22	0.74	0.28	2.42	0.15	0.06	1.94	0.02	0.02	0	0	0.18
170762	Nup155	0.58	0.34	0.35	1.65714			0.138181	0.63	0.59	1.26	0.69	0.55	0.58	0.75	0.44	0.47	0.42	0.36	0.55	0.43	0.41	0.52	0.37	0.32	0.49	0.22	0.35	0.31	0.16	0.27	0.15	0.3	0.71	0.42	0.31	0.72	0.17	0.21	1.18	0.25	0.48	0.32	1.79	0.13	0.15	0.08	0.03	0.08
59015	Nup160	0.65	0.59	0.18	3.27778			0.0617352	0.68	0.2	2.62	0.43	0.3	1.41	0.39	0.2	0.24	0.58	0.16	1.74	0.22	0.45	0.11	0.16	0.59	1.67	0.84	0.14	0.1	1.01	0.91	0.07	0.2	1.2	0.14	1.09	0.06	0.1	1.14	0.17	0.08	0.1	0.03	0.14	0.03	0.01	0.04	0	0
69736	Nup37	0.21	0.15	0	Inf			0.000942728	0.2	0.28	0.76	0.14	0.41	0.41	0	0	0	0.17	0	0.23	0.18	0	0.3	0.13	0.37	0	0.16	0.17	0.22	0	0	0	0.26	0.31	0.18	0	0	0	0	0	0	0	0	0	0	0	0	0	0
269113	Nup54	0.66	0.52	0.77	1.16667			0.211874	0.91	0.64	0.83	0.42	0.65	0.41	0.26	0.49	0.52	0.52	0.32	1.65	0.73	0.3	1.23	0.63	0.37	0.44	0.46	0.21	0.27	0.5	0.55	0.22	1.25	0.72	0.58	0.46	0.94	0.17	1.32	0.84	0.64	0.64	0.96	0.45	1.25	0.77	0.39	1.55	0.56
18226	Nup62	1.18	0.69	0.36	1.91667			1.6e-08	1.73	1.14	2.2	1.08	1.42	1.4	1.18	1.21	1.22	0.7	0.89	0.8	0.97	1.03	0.74	0.49	0.84	0.7	0.37	0.33	0.75	0.37	0.81	0.69	1.04	1.06	0.81	0.44	0.33	0.53	0.17	0.41	0.59	0.62	0.53	0.28	0.31	0.21	0.24	0.25	0.75
445007	Nup85	0.27	0.15	0.09	1.66667			0.000452538	0.27	0.38	0.46	0.49	0.41	0.19	0.36	0.17	0.18	0.25	0.22	0.13	0.19	0.28	0.09	0.2	0.15	0.06	0.17	0.22	0.23	0.15	0.15	0.04	0.14	0.23	0.07	0.19	0.05	0.04	0.12	0.07	0.07	0.02	0	0.51	0.08	0.05	0.28	0.03	0.03
18813	Pa2g4	17.82	15.25	15.12	1.16852			0.243077	26.29	19.23	33.89	13.59	21.44	19.38	10.57	15.37	20.77	12.9	11.32	18.13	15.23	14.2	15.04	18.71	12.5	16.6	15.48	11.91	9.98	13.26	11.08	20.31	22.09	15.76	15.27	18.26	12.58	18.18	23.06	13.78	14.69	13.52	14.05	14.05	12.86	13.78	15.61	18.14	8.33
11545	Parp1	1.52	1	0.46	2.17391			7.16e-09	1.84	2.62	2.14	1.54	1.92	1.6	1.23	1.41	1.22	0.84	1.09	1.47	1.08	1.41	1.42	0.91	0.69	1.73	0.78	0.93	1.25	0.65	1.22	0.67	1.31	0.92	0.97	0.61	1.01	0.6	0.54	0.55	0.55	0.93	0.84	0.51	0.38	0.31	0.27	0.16	0.15
67399	Pdlim7	0.07	0.09	0.06	1.28571			0.675647	0.08	0	0.35	0.2	0.09	0.09	0.05	0.03	0.05	0.06	0.03	0.05	0	0	0	0.09	0.1	0.12	0.04	0.08	0.08	0	0.12	0.18	0	0.16	0.12	0.06	0.21	0.16	0.06	0	0.22	0.17	0.07	0.18	0	0	0	0	0
234779	Plcg2	0.11	0.14	0.02	5.5			0.00759148	0.11	0.07	0.13	0.03	0.11	0.09	0.05	0.11	0.23	0.11	0.07	0.12	0.11	0.05	0.23	0.11	0.05	0.05	0.1	0.12	0.09	0.11	0.64	0.11	0.06	0.06	0.15	0.04	0.07	0.12	0	0.06	0.11	0	0	0	0	0	0	0	0
26433	Plod3	0.13	0.19	0.2	1.05263			0.314907	0.08	0.04	0.06	0.2	0.05	0.33	0.05	0.25	0.06	0.04	0.15	0.21	0.21	0.05	0.19	0.08	0.09	0.36	0.16	0.25	0.31	0.07	0.34	0.24	0.13	0.14	0.13	0.3	0.29	0.33	0.17	0.51	0.18	0.43	0.2	0.07	0.21	0.23	0.31	0	0.14
80294	Pofut2	0.1	0.1	0.03	3.33333			0.110418	0.06	0.04	0.28	0.05	0.08	0.2	0.03	0.2	0.07	0.01	0.05	0.07	0.04	0	0.32	0.04	0.17	0.32	0.07	0.17	0.46	0	0	0	0	0	0	0.09	0.07	0.12	0	0.16	0.07	0	0	0	0	0	0	0	0
50706	Postn	0.09	0.24	0.23	2.55556			0.0980698	0.12	0.07	0.04	0.08	0.24	0.07	0.05	0.12	0.2	0.03	0.04	0.14	0.11	0	0.11	0.17	0.15	0.13	0.17	0.09	0.17	0.3	0.36	0.44	0.15	0.29	0.4	0.74	0.2	0.28	0.39	0.39	0.78	0.09	0.23	0.63	0.03	0	0.06	0.25	0
19038	Ppic	0.58	0.75	0.44	1.2931			0.118636	0.74	1.02	1.09	0.32	0.63	0.68	0.43	0.88	0.61	0.28	0.49	0.3	0.43	0.29	0.48	0.38	0.47	1.34	0.72	0.71	0.79	0.48	0.38	0.8	1.21	0.63	1.07	0.92	0	1.12	0	1.03	1.22	0.6	0.6	0.72	0.45	0.53	0.61	0	0
243382	Ppm1k	0	1.62	2.99	Inf			0.0539882	0	0	0	0	0	0	0	0	0	0	0	0	0	0	0	0	0	0	0	0	0	4.51	0	0.02	1.14	12.03	1.69	4.35	5.03	0.23	0.47	0	3.47	16.91	3.73	3.72	0	0	0	0.09	3.83
100336	Ppp1r8	0.38	0.19	0.12	1.58333			0.00199854	0.14	0.24	0.89	0.42	0.65	0.62	0.37	0.38	0.89	0.22	0.14	0.29	0.02	0.32	0.17	0.05	0.17	0.33	0.15	0.01	0.25	0.07	0.35	0.27	0.07	0.33	0.23	0.07	0.36	0.23	0.09	0.4	0.32	0.26	0.18	0.08	0	0	0	0	0
19056	Ppp3cb	0.22	0.2	0.13	1.53846			0.289414	0.16	0.21	0.73	0.32	0.12	0.18	0.16	0.26	0.19	0.15	0.14	0.21	0.15	0.23	0.15	0.16	0.27	0.12	0	0.46	0.11	0.17	0.16	0.11	0	0.36	0.42	0.23	0.2	0.2	0	0.68	0.22	0.09	0	0.21	0	0	0	0	0
26442	Psma5	8.8	10.36	17.71	1.70946			6.56e-07	13.46	9.79	13.73	8.92	10.39	9.02	7.14	8.61	7.16	7.04	6.71	6.67	8.11	6.36	8.87	6.31	6	10.08	6.48	6.83	6.49	8.6	12.2	10.9	19.22	22.09	9.14	12.68	13.77	18.67	16.2	19.67	14.51	19.25	17.63	16.14	14.06	23.58	23.74	11.86	15.92
71461	Ptk7	0.74	0.44	0.02	22			0.0225748	1.49	0.11	0.22	2.31	0.07	3	1.17	0.1	0.11	0.07	2.01	0.1	0.08	0.08	0.11	1.24	1.85	0.14	0.02	0.02	0.11	1.23	0.08	0.42	0.11	0.04	0.07	0.06	0	0.03	0.05	0.08	0.1	0	0	0	0	0	0	0	0
15170	Ptpn6	2.09	3.21	3.14	1.50239			0.394965	1.59	0.37	4.87	0.31	3.18	2.69	0.94	4.37	2.68	2.1	1.35	1.61	1.72	1.72	1.84	1.62	1.61	4.18	1.17	4.75	4.29	2.2	3.41	2.28	5.57	4.68	2.78	4.3	1.69	6.59	2.78	7.84	12.67	4.63	0.92	5.24	1.15	1.59	1.26	0.37	2.7
19264	Ptprc	0.04	0.1	0.07	1.75			0.257968	0.01	0.01	0.02	0.01	0.01	0.01	0.05	0.1	0.01	0.08	0.01	0.16	0.02	0.01	0.04	0.1	0.02	0.13	0.06	0.21	0.02	0.06	0.04	0.16	0.08	0.13	0.21	0.05	0.16	0.46	0.1	0.32	0.2	0.02	0.01	0	0	0	0	0	0
69675	Pxdn	0.02	0.04	0.06	2			0.282212	0.04	0.01	0.05	0.01	0.02	0.02	0.02	0.01	0.02	0.01	0.02	0.02	0.05	0.02	0.04	0.05	0.03	0.03	0.04	0.02	0.07	0.16	0.03	0.04	0.02	0.02	0.02	0.33	0.13	0.02	0.14	0.03	0.08	0.06	0.1	0.24	0	0	0	0	0
66824	Pycard	0.42	0.46	0.19	2.21053			0.00109882	0.58	0.41	0.49	0.36	0.47	0.38	0.58	0.48	0.64	0.3	0.35	0.36	0.42	0.36	0.18	0.3	0.42	0.43	0.27	0.52	0.13	0.24	0.61	0.55	0.71	0.84	0.48	0.23	0.17	0.4	0.19	0.74	0.63	0.38	0.29	0.12	0.02	0	0.12	0	0
19340	Rab3d	0.04	0.08	0.04	2			0.173463	0	0	0	0.04	0.06	0	0.06	0.12	0.07	0	0.1	0.05	0	0.05	0.08	0.07	0.07	0.13	0.17	0.1	0.08	0	0.04	0.09	0.14	0	0.11	0.13	0.05	0	0	0.19	0.29	0	0	0	0	0	0	0	0
19354	Rac2	4.03	7.47	6.41	1.59057			0.0201837	1.95	4.27	3.17	3.33	2.51	3.42	5.17	4.59	3.41	3.42	4.93	4.39	4.88	4.54	6.41	4.54	6.39	9.66	7.48	10.84	10.76	7.24	5.09	4.96	5.87	10.6	6.24	9.65	8.72	14.05	9.63	14.4	9.17	5.4	8.86	5.91	3.57	5.24	5.68	4.67	2.06
19385	Ranbp1	5.46	4.82	2.19	2.20091			0.000337649	5.76	4.9	12.15	6.01	7.51	5.35	6.39	4.77	5.89	3.26	2.93	5.23	1.98	4.21	5.55	3.58	3.32	4.53	2.72	4.46	5.86	3.21	6.45	4.83	4.8	10.27	3.86	0	3.93	3.63	0	5.86	3.6	3.78	4.56	2.31	1.05	2.96	2.53	0	2.98
236732	Rbm10	0.14	0.08	0.08	1.75			0.0187495	0.15	0.16	0.17	0.13	0.32	0.21	0.11	0.1	0.14	0.09	0.09	0.16	0.13	0.08	0.12	0.18	0.07	0.07	0.06	0.08	0.03	0.03	0.07	0.06	0.05	0.2	0.03	0	0.23	0.21	0.08	0.1	0.07	0.05	0.11	0.13	0.16	0.07	0.09	0	0
19656	Rbmxl1	2.12	1.92	1.9	1.10417			0.804193	3.37	3.32	5.56	1.73	2.62	2.14	1.69	1.48	1.59	1.88	0	1.46	1.49	2.15	1.28	1.22	1.03	2.76	1.82	2.41	1.34	1.59	1.94	1.31	2.63	3.14	1.82	1.8	2.34	2.51	2.75	3.24	2.7	2.28	3.2	2.15	1.24	1.56	1.54	1.06	0.99
19672	Rcn1	0.66	0.52	0.66	1.26923			0.570232	0.87	0.74	1.97	0.42	0.76	0.88	0.26	0.75	0.48	0.46	0.34	0.41	0.51	0.37	0.63	0.39	0.31	0.58	0.5	0.21	0.92	0.28	0.44	0.67	0.4	0.94	0.59	0.93	0.76	0.92	0.82	1.55	1.02	0.97	1.13	0.81	0.55	0.71	0.67	0	0.2
52377	Rcn3	0.52	0.32	0.3	1.625			0.1884	0.77	0.3	2.07	0.58	0.9	0.8	0.36	0.32	0.33	0.25	0.19	0.21	0.12	0.39	0.2	0.25	0.14	0.39	0.25	0.32	0.38	0.15	0.29	0.54	0.22	0.41	0.44	0	0.15	0.55	0.04	0.49	0.67	0.67	0.51	0.67	0.18	0.59	0.25	0.29	0.04
72151	Rfc5	0.92	0.49	0.06	8.16667			0.000738589	1.5	1.63	2.88	0.58	0.92	0.45	0.47	0.58	0.45	1.06	0.36	0.43	0.62	0.26	1.55	0.81	0.27	2.34	1.22	0.2	0.14	0	0.15	0.2	0.22	0.15	0.16	0.58	0.12	0.1	0	0	0	0.19	0.1	0	0	0	0	0	0
11853	Rhoc	0.68	2.71	3.09	3.98529			0.312958	0	0	0	0	0	0	5.21	5.02	0	0	0	0	0	0	0	0	7.87	3.25	8.66	7.11	5.59	0	0	0	0	0	0	13.96	14.09	0	11.1	16.44	0	0	0	0	0	0	0	0	0
56532	Ripk3	0.13	0.07	0.01	7			6.87e-05	0.08	0.15	0.49	0.16	0.21	0.14	0.11	0.12	0.13	0.05	0.06	0.1	0.09	0.03	0.06	0.06	0.05	0.1	0.04	0.08	0.07	0	0.07	0.07	0.16	0.09	0.05	0.06	0.05	0	0	0	0	0	0	0	0	0	0	0	0
68240	Rpa3	2.03	1.64	0.81	2.02469			0.121345	2.09	1.82	6.28	2.2	2.27	1.85	2.13	2.23	2.22	1.48	1.25	1.87	1.67	0	1.12	1.55	0.57	3.35	0.34	2.28	1.37	0.4	0.78	0.49	0.61	0.99	6.99	0.68	0.25	4.22	0.92	1.42	0.56	0.47	5.32	0.41	0	0	0	0	0
67025	Rpl11	9.44	10.28	11.65	1.13327			0.342251	17.9	8.68	13.3	10.49	9.13	10.42	7.91	6.72	6.82	6	9.84	6.32	10.38	10.04	7.58	4.77	8.04	14.02	7.93	11.48	6.83	6.99	13.59	5.9	17.77	15.65	10.34	0	16.13	11.4	18.68	17.26	12.34	19.28	13.56	12.16	10.22	10.47	11.19	14.4	5.69
22121	Rpl13a	23.94	13.73	18.61	1.28641			0.193489	1.01	61.32	7.82	49.14	21.37	37.47	34.77	16.13	21.09	4.5	26.48	22.52	4.9	33.78	16.79	4.63	2.19	31.56	14.5	15.13	16.52	5.67	25.14	7.19	6.8	10.87	24.61	8.86	13.08	14.32	7.92	5.45	31.62	5.93	33.98	21.9	7.98	30.54	40.22	9.71	5.68
67115	Rpl14	27.35	35.3	14.22	1.92335			0.0405719	4.55	124.13	10.25	27.78	5.3	8.95	20.59	8.77	11.35	13.93	43.6	16.82	30.83	70.74	12.71	23.17	29.86	38.77	43.83	28.04	25.59	31.39	54.65	34.42	45.72	29.04	39.1	43.54	24.55	26.95	33.6	17.24	13.46	2.98	6.41	9.57	1.79	8.71	10.02	3.66	6.44
19942	Rpl27	20.76	19.08	32.44	1.56262			0.00269297	18.25	58	21.08	36.35	20.38	33.78	16.35	7.22	12.43	11.53	18.08	14.55	10.91	19.89	12.58	14.14	8.58	18.13	16.81	19.11	19.34	17.17	23.95	8.25	31.46	18.2	33.78	28.95	31.43	20.6	39.32	24.22	31.75	19.92	51.55	43.88	19.18	45.66	32.75	30.25	30.31
19989	Rpl7	8.4	11.67	9.34	1.24946			0.284113	1.13	19.21	2.06	5.69	6.51	17.74	8.42	9.34	7.94	3.58	12.54	11.37	4.72	8.74	7.04	9.29	4.85	15.35	12.91	10.98	11.64	10.79	17.95	8.9	12.63	5.89	18.91	6.88	17.47	10.39	14.29	7.71	15.49	1.91	10.68	7.11	0.23	8.51	12.84	1.65	2.38
27176	Rpl7a	7.65	8.58	11.05	1.28788			0.416152	0	0	0	22.98	3.69	14.45	10.93	5.64	8.61	1.67	9.55	7.38	3.6	16.82	9.48	3.18	2.2	17.63	4.79	9.73	9.57	3.59	13.16	13.49	7.48	6.04	12.07	7.16	0	18.13	0	7.1	19.32	0	19.85	14.81	1.78	24.29	17.63	0	2.97
26961	Rpl8	18.25	14.7	18.92	1.03671			0.660427	12.6	64.8	15.41	19.06	16.83	24.64	11.97	11.66	16.5	2.77	12.52	13.09	5.05	29.18	17.6	1.64	2.09	31.94	11.96	28.74	17.37	10.14	21.61	12.69	7.28	13.3	17.63	6.46	14.5	21.42	2.89	12.61	25.47	7.29	21.91	32.59	3.34	40.68	38.3	3.96	14.99
27370	Rps26	17.11	21.51	34.48	1.60298			0.000130958	24.49	26.31	18.39	21.96	14.89	21.84	15.79	12.15	9.97	15.28	8.87	14.91	16.56	13.2	22.07	15.7	6.58	22.93	29.71	19.53	7.9	16.38	21.64	14.23	37.37	12.37	53.75	33.02	53.18	31.05	26.54	18.99	39.22	32.4	60.95	25.91	37.56	34.29	39.02	43.1	21
76246	Rtf1	0.15	0.14	0.05	2.8			0.0832289	0.09	0.17	0.22	0.11	0.39	0.16	0.11	0.46	0.19	0.07	0.06	0.1	0.07	0.06	0.04	0.04	0.04	0.11	0.03	0.09	0.09	0.01	0.19	0.72	0.31	0	0.04	0.06	0.01	0.03	0.11	0	0.06	0.04	0.25	0	0.02	0.02	0.02	0	0
56505	Ruvbl1	4.66	3.25	1.67	1.94611			0.000140041	6.9	4.54	9.57	4.6	5.47	5.42	3.66	3.86	4.83	2.84	3.11	4.66	4.25	2.77	3.44	2.47	2.75	5.09	2.92	2.74	2.77	5.46	3.12	4.34	2.43	2.71	2.2	9.02	1.79	1.85	1.7	1.93	1.87	1.99	2.03	1.26	0.85	0.93	0.93	0.83	0.74
66118	Sarnp	8.54	7.25	4.28	1.69393			0.0229496	19.84	12.16	19.97	5.41	5.94	6.33	3.23	6.58	6.95	3.31	7.47	14.54	2.91	7.82	5.62	6.81	7.04	6.34	2.03	10.98	11.65	6.53	4.1	6.39	12.88	7.91	4.4	4.38	5.47	6.28	10.4	2	6.45	1.78	4.37	8.06	7.46	6.82	2.34	0.93	1.78
53890	Sart3	0.5	0.36	0.78	1.56			0.0923747	0.37	0.43	0.74	0.54	0.42	0.45	0.56	0.54	0.95	0.25	0.37	0.67	0.43	0.37	0.35	0.22	0.33	0.96	0.43	0.4	0.44	0.2	0.18	0.26	0.2	0.26	0.39	0.23	0.97	1.11	0.22	0.5	0.48	0.22	1.92	2.43	0.18	0.35	1.45	0.07	1.77
20317	Serpinf1	0.12	0.28	0.26	2.16667			0.305358	0	0	0	0.05	0.04	0	0.54	0.03	0.23	0.03	0.07	0.26	0.04	0.02	0.49	0.08	0.11	0.07	0.21	0.6	0.05	0.16	0.08	0.05	1.06	0.59	0.3	0.26	1.27	0.19	0.49	0	0.3	0.78	0.13	0.06	0.58	0	0.17	0.13	0
12406	Serpinh1	8.79	6.68	5.59	1.31587			0.123839	14.65	9.15	25.8	7.2	10.32	11.19	5.18	7.64	8.16	3.48	4.91	8.76	5.56	3.48	6.3	5.5	6.82	10.82	5.13	7.51	6.09	6.45	6.41	6.55	6.8	7.13	4.9	3.95	6.96	8.91	6.51	9	7.74	8.76	8.93	11.33	5.17	8.38	8.02	1.66	0.72
56086	Set	25.59	16.17	8.71	1.85649			0.000115087	65.86	34.58	41.62	30.67	32.42	30.14	18.92	12.41	14	20.33	13.64	16.82	24.66	16.01	11.83	10.08	20.04	14.41	15.62	11.76	12.27	23.36	13.5	12.16	26.71	22.48	11.62	17.5	12.06	15.75	10.96	18.56	10.73	7.26	8.45	10.83	6.7	5.65	6.2	6.3	5.49
75062	Sf3a3	1.45	1.37	0.98	1.05839			0.137042	1.88	1.9	2.91	1.23	2.17	1.39	1.14	0.92	1	1.34	1.13	1.19	1.6	0.83	1.16	1.3	0.86	1.18	0.94	1.44	0.8	1.65	1.5	0.9	2.32	2.61	0.97	1.13	0.72	1.13	0.74	1.13	2.7	0.45	0.69	1.22	0.35	0.56	0.81	2.12	0.4
71514	Sfpq	9.56	7.88	5.82	1.2132			0.0211568	4.62	12.38	26.3	7.81	8.99	10.1	9.07	9.11	10.33	7.99	5.14	9.43	7.28	6.28	8.58	5.94	5.8	9.81	6.92	7.08	8.82	5.77	6.58	9.43	9.31	10.44	8.63	6.61	6.95	8.66	4.88	9.76	9.91	7.68	7.17	6.25	5.18	6.8	6.3	3.2	3.14
20466	Sin3a	0.16	0.1	0.06	1.66667			0.000706258	0.15	0.16	0.29	0.18	0.28	0.19	0.1	0.22	0.17	0.07	0.15	0.14	0.15	0.08	0.07	0.11	0.07	0.18	0.07	0.11	0.03	0.04	0.05	0.25	0.02	0.04	0.28	0.12	0.06	0.08	0.03	0.06	0.15	0.04	0.03	0.14	0.03	0.05	0.05	0	0
229731	Slc25a24	0.06	0.09	0.04	1.5			0.24841	0.17	0.07	0.09	0.03	0.05	0.1	0.03	0.05	0.04	0.04	0.05	0.04	0	0.02	0.1	0	0.05	0.13	0.12	0.16	0.34	0.06	0	0.14	0	0.04	0.09	0.34	0.06	0.27	0	0	0	0	0	0	0	0	0	0	0
93762	Smarca5	0.87	0.53	0.26	2.03846			5.59e-07	0.65	1.37	1.45	1.41	0.89	0.92	0.9	0.56	0.69	0.51	0.67	0.89	0.78	0.87	0.43	0.92	0.63	0.78	0.47	0.52	0.41	0.34	0.54	0.31	0.53	0.42	0.48	0.51	0.45	0.52	0.55	0.57	0.45	0.07	0.51	0.25	0.07	0.15	0.09	0	0.01
66585	Snrnp40	1.2	0.95	0.7	1.26316			0.0550096	1.61	1.29	2.21	1.89	1.47	1.46	1.18	1.25	1.04	0.59	0.8	0.94	0.99	0.48	0.82	0.65	0.94	1.26	0.89	1.25	0.32	1.06	0.78	0.73	1.28	1.56	0.63	1.42	0.64	0.56	2.16	2.12	0.75	0.58	1.38	0.42	0.24	0.42	0.56	0.33	0.57
68981	Snrpa1	3.19	2.5	1.32	1.89394			3.51e-05	3.79	4.27	6.78	4.54	3.42	3.19	2.34	2.37	3.04	2.52	2.33	2.15	2.39	2.52	2.19	2.72	2.34	1.91	2.18	2.68	1.51	1.93	4.23	2.49	3.06	3.15	1.86	3.23	1.13	2.31	2.39	1.82	1.83	0.93	1.63	1.38	1.54	1.23	1.51	1.02	0.72
20641	Snrpd1	4.01	3.73	3.31	1.07507			0.555024	1	5.34	4.24	4.12	4.45	8.08	4.22	4.05	3.81	1.32	3.3	5.85	1.57	3.55	5.22	1.26	3.09	6.69	3.92	3.01	2.62	2.22	6.68	4.27	3.58	3.4	4.04	3.97	5.29	4.06	4.78	3.58	6.46	3.27	6.8	3.27	1.5	3.39	3.12	2.19	1.2
20643	Snrpe	3.99	1.29	2.57	1.99225			0.0251587	2	0	8.99	4.15	6.4	4.66	3.35	4.69	4.69	3.1	2.82	5.56	2.03	2.43	4.99	0	0	0	0	0	0	2.24	0.68	3.67	3.18	3.03	2.72	2.79	6.23	6.1	2.99	1.06	2.01	7.33	8.31	1.96	0	0	0	0	3.88
20649	Sntb1	0.22	0.71	1.2	3.22727			1.39e-06	0.03	0.12	0.15	0.04	0.2	0.09	0.19	0.66	0.23	0.13	0.12	0.61	0.08	0.06	0.61	0.18	0.36	0.72	0.68	0.51	0.27	0.43	0.93	1.08	0.85	1.04	1.52	0.9	0.75	0.91	1.21	1.38	0.86	0.72	0.92	1.07	0.75	1.35	0.99	2.93	1.24
20692	Sparc	0.2	0.41	0.61	2.05			0.0136469	0.42	0.22	0.43	0.2	0.26	0.35	0.08	0.22	0.23	0.12	0.18	0.12	0.12	0.03	0	0.14	0.11	0.35	0.14	0.23	0.26	0.51	0.61	0.25	0.57	1.44	0.31	0.35	0.4	0.75	0.97	1.51	1.22	0.52	1.31	0.65	0.93	0.66	0.45	0.11	0
57815	Spata5	0.04	0.01	0.02	2			0.35201	0.11	0.03	0.03	0.03	0.1	0.07	0.03	0.04	0.01	0.01	0.02	0.01	0.02	0.02	0	0	0	0	0	0	0	0	0	0	0	0.1	0.03	0	0	0	0.01	0	0.02	0	0	0	0.02	0	0.02	0	0
20773	Sptlc2	0.31	0.72	0.59	1.90323			0.812674	0.08	1.29	0.13	0.07	0.02	0.89	0.09	0.05	0.03	1.61	0.04	0.09	0.07	0.01	0.11	0.02	0.04	0.04	4.71	0.03	0.05	0.02	0.04	0.03	0.24	3.34	0.1	0.14	0.12	0	0.24	0.09	0.11	0.06	9.44	0.17	0.12	0.02	0	0	0
110809	Srsf1	26.82	24.09	15.97	1.50845			0.000100064	32.27	26.2	47.52	23.49	29.63	31.62	23.11	24.59	28.66	21.65	22.38	28.43	19.73	22.42	20.64	22.19	18.73	27.21	18.23	24.4	30.06	16.23	26.11	18.57	32.55	34.12	20.69	23.77	14.57	23.25	17.91	26.95	19.16	16.61	22.73	18.91	12.29	16.51	12.92	14.8	11.13
20383	Srsf3	8.5	4.97	6.87	1.23726			0.301346	4.06	2.37	15.03	4.61	3.68	16.72	7.34	9.16	10.46	2.06	5.23	18.84	3.11	8.59	16.19	2.22	2.51	15.12	3.52	0	12.68	2.14	4.3	4.65	6.43	3.07	3.02	3.24	9.73	14.66	4.71	4.29	18.61	3.12	9.9	14.15	0	14.65	10.85	0	0.95
20833	Ssrp1	3.25	1.64	1.15	1.98171			1.8e-08	3.53	2.89	4.13	3.88	5.04	4.46	4.09	3.1	3.11	2.05	2.4	2.85	2.75	2.13	2.29	2.41	2.16	1.65	1.48	1.45	1.29	1.08	1.77	0.88	2.14	1.74	1.65	1.11	1.81	0.89	1.97	2.2	0.96	2.29	0.84	0.76	0.82	2.15	2.35	0.67	0.04
20851	Stat5b	0.22	0.27	0.4	1.48148			0.00824708	0.17	0.12	0.4	0.16	0.19	0.18	0.2	0.27	0.25	0.14	0.16	0.36	0.24	0.15	0.26	0.25	0.28	0.31	0.22	0.34	0.25	0.25	0.18	0.25	0.25	0.39	0.31	0.32	0.37	0.35	0.31	0.57	0.52	0.72	0.84	0.82	0.29	0.33	0.54	0.19	0.31
58231	Stk4	0.24	0.19	0.08	2.375			5.64e-05	0.2	0.06	0.42	0.33	0.25	0.34	0.28	0.22	0.28	0.14	0.21	0.37	0.09	0.17	0.19	0.12	0.11	0.32	0.22	0.24	0.18	0.16	0.16	0.29	0.17	0.17	0.15	0.1	0.16	0.18	0.17	0.27	0.14	0.07	0.13	0	0.04	0.02	0.07	0	0
68292	Stt3b	0.37	0.78	1.07	2.10811			5.53e-06	0.15	0.34	0.35	0.38	0.22	0.23	0.4	0.48	0.3	0.18	0.36	0.41	0.27	0.55	0.91	0.32	0.52	1.06	0.78	0.94	0.45	0.62	0.94	0.65	1.13	1.15	0.85	1.35	0.87	2.06	1.26	1.73	1.32	0.74	1.25	1.23	0.34	0.93	1.18	1.28	0.76
108903	Tbcd	0.18	0.22	0.12	1.22222			0.0742563	0.21	0.34	0.12	0.16	0.25	0.18	0.14	0.27	0.13	0.07	0.14	0.34	0.16	0.13	0.13	0.18	0.06	0.39	0.16	0.43	0.07	0.32	0.23	0.22	0.05	0.19	0.28	0.1	0.14	0.12	0.06	0.32	0.24	0.09	0.37	0.1	0.05	0.24	0.07	0.01	0.09
56070	Tcerg1	1.04	0.66	0.69	1.50725			0.136309	0.36	1.2	1.28	1.59	0.8	1.09	0.62	0.78	0.74	3.3	0.6	0.8	0.96	0.79	0.62	0.38	0.46	0.36	0.75	0.78	0.31	0.46	1.07	0.88	0.64	1.06	0.8	0.79	0.45	1.42	0.84	1.23	0.69	1.28	0.56	0.66	0.16	1.02	1.3	0.31	0.11
269536	Tex10	0.09	0.05	0.02	2.5			0.00118464	0.06	0.12	0.24	0.16	0.08	0.02	0.1	0.05	0.02	0.03	0.14	0.02	0.08	0.18	0.02	0.05	0.04	0.06	0.03	0.07	0.04	0.03	0.14	0.04	0.06	0.05	0.03	0.05	0.01	0.02	0.05	0.07	0.04	0	0.01	0.07	0	0.01	0.01	0	0
21825	Thbs1	1.51	2.01	0.64	2.35938			1.65e-05	1.88	1.44	2.99	1.32	1.52	1.88	1.21	1.44	1.6	1.23	0.97	1.74	0.96	0.88	1.55	0.98	1.28	2.57	1.9	2.44	1.72	1.59	2.18	1.5	2.84	2.62	2.52	1.46	1.08	1.97	1.13	1.59	2.42	0.67	0.45	0.15	0.12	0.05	0	0.04	0.06
21872	Tjp1	0.13	0.43	0.71	3.30769			3.46e-09	0.1	0.07	0.18	0.1	0.24	0.11	0.04	0.15	0.13	0.11	0.12	0.19	0.1	0.07	0.18	0.14	0.13	0.38	0.32	0.37	0.24	0.34	0.64	0.39	0.79	0.92	0.53	0.69	0.36	0.65	0.81	0.82	0.85	0.68	0.65	0.62	0.5	1.36	0.8	0.6	0.93
21917	Tmpo	3.13	2.66	1.44	1.84722			1.41e-05	3.52	4.49	5.14	4.54	3.27	2.68	3.08	2.64	2.61	2.22	2.61	1.8	3.01	3.58	1.75	3.21	2.17	3.7	2.08	2.83	2	1.86	3.13	1.93	3.55	3.28	2.15	2.77	2.23	1.78	2.1	3.12	2.12	1.46	1.98	1.25	1.24	1.09	0.97	1.03	0.89
21923	Tnc	0.03	0.26	0.33	8.66667			0.00405295	0.05	0.02	0.03	0.02	0.03	0.04	0.02	0.01	0	0	0.03	0.02	0.02	0	0.09	0.06	0.02	0.19	0.18	0.11	0.13	0.14	0.32	0.26	0.2	0.58	0.88	0.59	0.45	0.44	0.87	0.9	0.94	0.11	0.25	0.28	0.11	0.38	0.03	0.25	0.06
319939	Tns3	0.02	0.06	0.08	3			0.0631402	0.01	0.05	0.03	0	0.02	0.09	0	0.02	0.02	0.02	0.01	0.01	0.01	0.01	0.02	0.01	0.11	0.05	0.04	0.06	0.02	0.03	0.06	0.13	0.02	0	0.14	0.08	0.08	0.07	0.06	0.08	0.06	0.32	0.32	0.05	0	0.04	0.07	0	0
545486	Tubb1	10.55	8.97	3.65	2.45753			5.95e-06	12.17	8.68	20.22	11	11.76	12.25	9.34	9.34	10.45	8.68	7.01	10.29	10.86	7.41	8.77	8.09	8.13	10.05	12.25	9.62	7.37	8.21	11.09	5.44	14.11	6.96	6.29	9.2	9.88	6.72	8.78	7.92	5.61	0	8.97	2.73	0	0	0	0	0
22154	Tubb5	116.63	87.97	50.25	1.75065			2.24e-10	137.53	109.85	153.53	117.1	120.34	140.96	106.25	112.46	129.17	109.91	97.26	122.03	120.26	90.42	82.35	92.79	95.38	108.22	87.04	73.39	92.49	65.66	104.91	61.47	109.64	95.83	68.83	74.57	65.87	74.31	62.39	97.94	62.42	62.59	53.02	49.62	37.42	49.2	54.43	31.95	30.4
67951	Tubb6	18.21	14.9	9.58	1.55532			7.95e-05	21.33	14.49	30.13	16.1	20.06	24.41	14.64	17.52	20.12	13.84	12.45	20.31	18.34	13.54	15.84	13.53	14	18.46	15.69	15.08	13.94	12.68	16.73	10.08	22	13.51	13.09	14.56	12.87	13.43	14.93	13.32	11.15	13.67	12.18	8.71	14.55	11.29	10.02	11.77	9.92
22247	Umps	4.74	4.46	2.93	1.52218			0.158749	3.93	4.3	6.39	3.28	3.46	4.95	4.06	14.76	8.58	2.64	2.71	2.38	4.95	2.44	2.23	3.17	6.97	2.92	2.9	2.47	1.64	2.31	3.08	11.33	5.11	3.78	7.83	3.26	3.37	5.12	2.91	2.03	2.13	2.09	2.38	2.76	6.99	2.53	3.03	3.19	6.04
74996	Usp47	0.17	0.17	0.22	1.29412			0.247805	0.11	0.11	0.4	0.12	0.17	0.37	0.14	0.15	0.18	0.18	0.13	0.14	0.09	0.1	0.14	0.06	0.13	0.2	0.24	0.25	0.08	0.22	0.15	0.18	0.21	0.1	0.22	0.09	0.42	0.19	0.14	0.17	0.29	0.23	0.12	0.21	0.38	0.24	0.21	0.15	0.14
22330	Vcl	2.49	5.03	4.68	1.87952			0.00200386	2.81	2.02	3.75	1.51	3.13	2.01	1.16	2.3	2.37	5.03	1.16	2.01	4.66	1.67	1.78	6.58	1.48	3.24	3.83	6.5	2.4	7.42	5.95	2.62	7.15	9.74	3.44	5.7	6.65	4.38	7.48	8.71	4.93	4.91	5.1	4.16	4.23	3.92	3.35	2.55	4.92
22352	Vim	9.07	19.03	17.68	1.94928			0.00233114	11.73	10.25	17.44	6.92	9.24	9.16	5.84	9.18	8.35	7.56	7.94	9.49	6.86	5.24	10.86	10.99	6.71	15.86	19.48	18.26	15.11	18.72	20.35	21.45	32.45	26.79	22.21	29.79	28.37	26.98	23.67	34.43	26.07	20.84	23.27	17.74	11.84	14.21	10.44	19.33	5.8
22376	Was	0.02	0.07	0.06	3			0.570919	0	0	0	0	0	0	0.14	0.06	0.02	0.04	0	0.03	0	0	0	0	0	0	0.1	0	0.05	0	0	0	0.45	0	0.28	0	0.42	0.58	0	0	0	0	0	0	0	0	0	0	0
60321	Wbp11	0.7	0.64	0.17	3.76471			0.0233204	0.92	0.93	2.62	0.82	1.03	1.35	0.75	0.22	0.15	0.33	0.23	0.25	0.52	0.17	0.21	0.13	0.08	0.24	1.41	1.47	0.19	0.12	1.79	0.18	1.51	0.39	0.16	0.79	0.3	0.29	0.16	0.28	0.21	0.23	0.35	0.06	0.08	0.14	0.1	0	0
218973	Wdhd1	0.91	0.81	0	Inf			0.00246136	1.36	0.28	0.68	1.73	1.13	0.47	1.33	1.33	1.7	0.54	0.27	1.88	0.51	0.22	0.15	1.15	2.12	2.99	0.12	0.04	2.93	0	0	0	0.02	0.19	0.17	0	0	0	0	0	0	0	0	0	0	0	0	0	0
72515	Wdr43	0.54	0.35	0.13	2.69231			2.33e-06	0.82	0.91	1.05	0.77	0.78	0.69	0.5	0.3	0.46	0.28	0.27	0.32	0.35	0.35	0.29	0.27	0.3	0.4	0.43	0.26	0.27	0.28	0.34	0.18	0.58	0.56	0.36	0.28	0.23	0.09	0.36	0.28	0.11	0.25	0.21	0	0.15	0.17	0.09	0	0
22628	Ywhag	8.44	16.55	15.48	1.83412			0.000277509	10.28	7.05	13.21	6.79	6.8	9.11	5.26	8.27	6.9	10.39	4.88	11.99	10.46	6.81	8.34	10.66	6.27	15.15	14.29	13.09	12.37	13.26	15.6	19.24	32.17	20.96	25.56	26.6	17.45	18.15	21.16	18.88	21.83	13.75	13.59	16.87	12.48	11.11	13.81	14.38	14.47
78781	Zc3hav1	0.51	0.19	0.36	1.89474			0.0105152	0.3	0.25	0.69	0.23	0.53	1.04	0.57	0.53	0.87	0.5	0.18	0.48	0.32	0.68	0.42	0.21	0.17	0.31	0.21	0.12	0.15	0.1	0.09	0.15	0.16	0.26	0.34	0.28	0.24	0.45	0.19	0.29	0.29	0.1	0.2	0.13	0.99	0.37	0.3	0.21	0.27
22793	Zyx	1.09	1.06	0.26	4.07692			0.00146078	1.23	0.91	3.14	0.16	0.51	1.6	0.58	2.62	0.93	0.54	0.81	0.35	0.9	0.65	1.37	0.31	1.93	2.1	0.52	0.43	2.44	0.7	0.96	0.96	0.73	0.9	0.79	0.16	0.21	1.18	0.12	0.53	0.93	0.05	0.23	0.21	0.01	0.16	0.13	0.08	0.05
[truncated: 4 more columns]

## Sheet: Sheet3
Gene.ID	GeneSymbol	Cluster1	Cluster2	Cluster3	Ratio	specific phase	specificity	FDR	E12.5.1.Exp018736	E12.5.2.Exp018737	E12.5.3.Exp018738	E13.5.1.Exp018739	E13.5.2.Exp018740	E13.5.3.Exp018741	E14.5.1.Exp018742	E14.5.2.Exp018743	E14.5.3.Exp018744	E15.5.1.Exp018745	E15.5.2.Exp018746	E15.5.3.Exp018747	E16.5.1.Exp018748	E16.5.2.Exp018749	E16.5.3.Exp018750	E17.5.1.Exp018751	E17.5.2.Exp018752	E17.5.3.Exp018753	E18.5.1.Exp018754	E18.5.2.Exp018755	E18.5.3.Exp018756	D1.1.Exp018757	D1.2.Exp018758	D1.3.Exp018759	D3.1.Exp018760	D3.2.Exp018761	D3.3.Exp018762	D5.1.Exp018763	D5.2.Exp018764	D5.3.Exp018765	W1.1.Exp018766	W1.2.Exp018767	W1.3.Exp018768	W2.1.Exp018769	W2.2.Exp018770	W2.3.Exp018771	W3.1.Exp018772	W3.2.Exp018773	W3.3.Exp018774	W6.1.Exp018775	W6.2.Exp018776
66185	Adgre5	0.06	0.05	0.02	2.5			0.500174	0	0	0	0.01	0.03	0	0	0.05	0.72	0.03	0	0.03	0.02	0.01	0.03	0.05	0.09	0.01	0	0.1	0.05	0	0.03	0.05	0.06	0.1	0.05	0.06	0	0.1	0	0.06	0.07	0	0	0	0	0	0	0	0
70984	Adgrg1	0.01	0	0	Inf	1	Cluster Enriched	0.0163004	0.03	0.05	0.02	0.03	0	0.07	0	0	0	0	0	0	0	0	0	0	0	0	0	0	0	0	0	0	0	0	0	0	0	0	0	0	0	0	0	0	0	0	0	0	0
240185	Arhgap45	0.09	0.08	0.03	2.66667			0.000450072	0.08	0.07	0.16	0.04	0.05	0.09	0.1	0.11	0.08	0.11	0.06	0.12	0.08	0.08	0.14	0.05	0.09	0.1	0.06	0.11	0.14	0.05	0.02	0.07	0.12	0.05	0.07	0.16	0.07	0.06	0.09	0	0.1	0.04	0	0.01	0	0	0	0	0
268860	C1s1	0	0.02	0.05	2.5	3	Cluster Enriched	0.0240834	0	0	0	0	0	0	0	0	0	0	0.01	0.02	0	0	0	0	0.04	0.05	0	0.1	0.06	0	0	0	0	0	0	0.12	0	0.1	0	0.07	0.07	0.18	0.13	0.08	0	0	0	0	0
11303	Cavin2	0.18	0.66	0.34	1.88889			0.0246358	0.11	0.02	0.06	0.08	0.34	0.17	0.04	0.16	0.08	0.22	0.34	0.24	0.16	0.41	0.26	0.22	0.53	0.83	0.21	0.71	0.73	0.68	0.81	0.33	0.14	0.83	1.95	0.07	0.88	0.75	0.05	0.14	0.13	0.13	0.14	0.12	0.59	0.15	0.32	0	0.05
18671	Chil1	0	0.04	0	Inf	2	Cluster Enriched	0.00177815	0	0	0	0	0	0	0	0.02	0.01	0	0	0	0	0	0	0	0.07	0.15	0.06	0.12	0.09	0	0	0	0	0	0	0	0	0	0	0	0	0	0	0	0	0	0	0	0
54608	Coq8b	0.01	0.02	0.14	7	3	Cluster Enriched	0.166162	0	0	0	0.02	0.02	0.01	0.01	0	0.11	0	0	0	0	0	0	0	0	0	0.01	0.04	0.03	0.02	0.02	0	0.02	0	0.05	0	0	0	0.05	0	0.09	0	0	0	1	0	0.03	0	0
105501	Epb41l5	0.02	0.08	0.13	4			1.91e-05	0	0	0	0.01	0.01	0.01	0.02	0.02	0.03	0.02	0.03	0.04	0.03	0.03	0.04	0.05	0.06	0.17	0.07	0.05	0.09	0.03	0.06	0.03	0.09	0.13	0.07	0.05	0.1	0.06	0.09	0.1	0.09	0.05	0.12	0.08	0.13	0.18	0.19	0.31	0.05
67469	Gpat3	0	0.1	0.13	Inf			0.100957	0	0	0	0	0	0	0	0	0	0	0	0	0	0	0	0	0	0	0	0	0	0	0	0	0.76	0.26	0.15	0.22	0.24	0.12	0.22	0.46	0.35	0.09	0.49	0.11	0	0	0	0	0
11432	Gucy1a1	0.03	0.11	0.18	3.66667			0.0396242	0.03	0.02	0.15	0.04	0.01	0	0.04	0.03	0.02	0	0.01	0.01	0.03	0.01	0.02	0.01	0.05	0.22	0	0.03	0.05	0.08	0.07	0.06	0.17	0.42	0.12	0.18	0.14	0.51	0.27	0.15	0.39	0.8	0.14	0.33	0.03	0.19	0.07	0	0
71670	Ifi209	0	0.14	0.06	2.33333	2	Cluster Enriched	0.120672	0	0	0	0	0	0	0	0	0	0	0	0	0	0	0	0.01	0.05	0.04	0.09	0.17	0	0.06	0.22	0.04	0.1	0.07	0.8	0.16	0.03	0.03	0.11	0	0.71	0	0.04	0.03	0	0	0	0	0
76889	Jcad	0	0.01	0	Inf	2	Cluster Enriched	0.132508	0	0	0	0	0	0	0	0	0	0	0	0	0	0	0	0	0	0	0	0	0	0	0.05	0.02	0	0	0	0	0	0	0	0	0	0	0	0	0	0	0	0	0
15463	Msmo1	0.36	0.69	0.42	1.64286			0.246399	0.24	0.3	0	0	0	0	0.22	1.03	0.29	0	0.45	0.43	0.67	1.03	0.73	0.42	0.53	1.39	0.77	1.68	0.53	0.63	0.57	0	0.51	0.47	0.82	0	0	0	0	0	0	0	0	0	0.94	0	2.35	0.53	0.8
67512	Ripor1	0.02	0	0	Inf	1	Cluster Enriched	0.145584	0.01	0.15	0.01	0.03	0.01	0.02	0	0	0	0	0	0	0	0	0	0	0	0	0	0	0	0	0	0	0	0	0	0	0	0	0	0	0	0	0	0	0	0	0	0	0
231510	Virma	0.03	0.03	0	Inf			0.00830749	0.04	0.03	0.04	0.02	0.02	0.04	0.02	0.04	0.04	0.01	0.02	0.02	0.03	0.02	0	0.01	0.01	0.02	0	0	0	0.01	0.02	0.04	0.02	0.06	0.13	0	0	0	0.01	0.04	0.01	0	0	0	0	0	0	0	0
71361	Ank1	2.92	1.33	0.24	2.19549	1	Cluster Enriched	3.94e-09	1.97	1.93	5.88	4.66	2.3	1.91	2.83	3.64	3.46	2.54	4.37	2.75	2.31	2	1.29	2.11	1.62	1.45	1.18	0.69	0.93	0.71	3.77	1.03	0.24	0.44	1.75	0.7	0.45	0.16	0.33	0.24	0.42	0.1	0.05	0.17	0.29	0.29	0.04	0.09	0.11
11658	Ap1g2	0.09	0.04	0	2.25	1	Cluster Enriched	0.00594911	0.04	0.09	0.23	0.07	0.34	0.06	0.07	0.11	0.07	0.06	0.03	0.04	0.11	0.03	0.04	0.03	0.01	0.36	0	0	0	0	0	0	0.03	0.08	0.02	0	0	0	0	0	0	0	0	0	0	0	0	0	0
11733	Bcl11a	0.06	0	0	Inf	1	Cluster Enriched	0.00152749	0.08	0.31	0.12	0.09	0.07	0	0.13	0	0.04	0	0	0	0.11	0.02	0	0	0	0	0	0	0	0	0	0	0	0	0	0	0	0	0	0	0	0	0	0	0	0	0	0	0
329154	Bod1	0.01	0	0	Inf	1	Cluster Enriched	0.0526346	0	0	0	0	0.02	0.09	0	0.05	0.04	0	0	0	0	0	0	0	0	0	0	0	0	0	0	0	0	0	0	0	0	0	0	0	0	0	0	0	0	0	0	0	0
16952	Btk	0.15	0.06	0.01	2.5	1	Cluster Enriched	0.000344115	0.12	0.29	0.46	0.15	0.27	0.22	0.12	0.07	0.07	0.04	0.08	0.07	0.08	0.12	0.05	0.04	0.04	0.07	0.34	0.06	0.03	0.01	0.03	0.02	0.09	0	0.05	0.1	0.04	0.02	0	0	0	0	0	0	0	0	0	0	0
11745	Car2	109.43	51.61	21.51	2.12033	1	Cluster Enriched	4.59e-08	68.39	60.13	172.06	64.96	122.03	143.8	94.86	125.26	143.88	54.18	90.68	185.27	93.86	85.66	136.39	54.51	28.61	129.46	43.25	45.46	142.47	32.25	29.83	28.83	17.85	39.98	26.81	45.94	31.51	30.99	21.68	22.66	25.82	20.91	24.87	25.75	12.21	26	19.22	6.09	23.64
11749	Cbfa2t3	0.01	0	0	Inf	1	Cluster Enriched	0.108349	0.02	0	0.11	0	0.04	0.02	0	0	0	0	0	0	0	0	0	0	0	0	0	0	0	0	0	0	0	0	0	0	0	0	0	0	0	0	0	0	0	0	0	0	0
11766	Cd34	0.01	0	0	Inf	1	Cluster Enriched	0.3314	0	0	0	0.02	0.15	0	0	0	0	0	0	0	0	0	0	0	0	0	0	0	0	0	0	0	0	0	0	0	0	0	0	0	0	0	0	0	0	0	0	0	0
54519	Cep170	0.01	0	0	Inf	1	Cluster Enriched	0.0371559	0.02	0	0.03	0.01	0	0.08	0.01	0.02	0	0	0	0	0	0	0	0	0	0	0	0	0	0	0	0	0	0	0	0	0	0	0	0	0	0	0	0	0	0	0	0	0
11826	Dock10	0.01	0	0	Inf	1	Cluster Enriched	0.793977	0	0	0	0	0	0	0	0	0	0.01	0.12	0	0	0	0	0	0	0	0	0	0	0	0	0	0.02	0.01	0.01	0	0	0	0.07	0	0.01	0	0	0	0	0	0	0	0
232201	Dok1	0.21	0.02	0	10.5	1	Cluster Enriched	0.012331	0.25	0.13	0.33	0.16	0.15	0.06	0.08	0.05	0.14	0.13	0.23	0.1	1.36	0.04	0	0.1	0.01	0	0	0.12	0.06	0	0	0	0	0	0	0	0	0	0	0	0	0	0	0	0	0	0	0	0
11857	Eef2k	0.08	0.03	0	2.66667	1	Cluster Enriched	2.65e-06	0.04	0.1	0.08	0.03	0.07	0.09	0.12	0.02	0.14	0.11	0.06	0.07	0.09	0.07	0.07	0.18	0.03	0.04	0.05	0	0.1	0	0	0	0	0	0	0	0	0	0	0	0	0	0	0	0	0	0	0	0
73341	Fam117a	0.02	0	0	Inf	1	Cluster Enriched	2.67e-05	0.02	0.05	0.06	0.04	0.02	0.05	0.04	0	0.01	0	0	0	0.01	0.04	0	0	0	0	0	0	0	0	0	0	0	0	0	0	0	0	0	0	0	0	0	0	0	0	0	0	0
11867	Gfi1b	0.01	0	0	Inf	1	Cluster Enriched	0.0970282	0	0	0	0.06	0.05	0.02	0	0	0	0	0	0	0	0	0	0	0	0	0	0	0	0	0	0	0	0	0	0	0	0	0	0	0	0	0	0	0	0	0	0	0
12010	Gpatch8	0.01	0	0	Inf	1	Cluster Enriched	0.00497429	0.03	0.01	0.03	0.06	0.02	0.03	0	0.02	0.01	0	0	0	0	0	0	0	0.01	0.01	0	0	0	0	0	0	0	0.01	0.02	0	0	0	0	0	0	0	0	0	0	0	0	0	0
14025	Hbb-b2	501.74	0	0	Inf	1	Cluster Enriched	0.174393	0	0	0	0	0	0	0	0	0	3902.41	3623.68	0	0	0	0	0	0	0	0	0	0	0	0	0	0	0	0	0	0	0	0	0	0	0	0	0	0	0	0	0	0
69556	Hdac3	0.12	0	0	Inf	1	Cluster Enriched	2.87e-08	0.19	0.14	0.29	0.14	0.05	0.16	0.08	0.08	0.06	0.14	0.08	0	0.16	0	0.24	0	0	0	0	0	0	0	0	0	0	0	0	0	0	0	0	0	0	0	0	0	0	0	0	0	0
12229	Hspa12b	0.06	0	0	Inf	1	Cluster Enriched	0.181203	0.05	0.06	0.67	0	0.05	0.04	0	0	0	0	0	0	0.05	0.03	0	0	0	0	0	0	0	0	0	0	0	0	0	0	0	0	0	0	0	0	0	0	0	0	0	0	0
50909	Ikzf1	0.21	0.01	0	21	1	Cluster Enriched	4.55e-08	0.29	0.07	0.55	0.26	0.15	0.1	0.07	0.26	0.12	0.18	0.14	0.38	0.12	0.36	0.08	0.02	0.1	0.03	0	0	0	0	0	0	0	0	0	0	0	0	0	0	0	0	0	0	0	0	0	0	0
50908	Itga4	0.24	0.07	0	3.42857	1	Cluster Enriched	1.17e-10	0.24	0.08	0.37	0.32	0.2	0.22	0.32	0.26	0.41	0.23	0.21	0.13	0.29	0.24	0.07	0.16	0.22	0.17	0	0.11	0.07	0	0.04	0.03	0	0	0	0	0	0	0	0	0	0	0	0	0	0	0	0	0
12266	Kdr	0.33	0.01	0	33	1	Cluster Enriched	0.182569	0	0	0	0	0.01	0.01	0	2.18	2.79	0	0	0	0	0	0	0	0	0	0	0	0	0	0.01	0.01	0.04	0.01	0.02	0.03	0	0.01	0	0	0	0	0	0	0	0	0	0	0
54598	Kit	0.03	0.01	0	3	1	Cluster Enriched	0.000503159	0.03	0	0.03	0.01	0.03	0	0	0.05	0.01	0.03	0.06	0.07	0.03	0.08	0.01	0.02	0	0.02	0	0	0	0.01	0	0.01	0.04	0	0.02	0	0	0	0	0.01	0.02	0	0	0	0	0	0	0	0
12332	Lcp2	2.12	0.31	0.03	6.83871	1	Cluster Enriched	0.0437722	0	0	0	0	0.04	7.91	5.09	9.54	9.19	0	0	0	0	0	0	0	3.42	0.02	0	0	0	0	0	0	0.1	0	0.15	0	0.07	0.48	0	0	0	0	0	0	0	0	0	0	0
12349	Lmo2	0.05	0	0	Inf	1	Cluster Enriched	0.0135761	0.13	0	0.25	0.23	0.1	0.1	0	0	0	0	0	0	0	0	0	0	0	0	0	0	0	0	0	0	0	0	0	0	0	0	0	0	0	0	0	0	0	0	0	0	0
12362	Lrrc8c	0.04	0.01	0.01	4	1	Cluster Enriched	0.00170416	0.05	0.03	0.03	0.07	0.04	0.04	0.05	0.01	0.04	0.02	0.07	0.04	0.05	0.05	0	0.03	0.09	0	0	0	0	0	0	0	0	0	0	0.09	0	0.05	0	0	0	0	0	0	0	0	0	0	0
12370	Mapk8	0.17	0	0	Inf	1	Cluster Enriched	0.399074	0.01	2.45	0.05	0	0	0	0	0	0	0	0	0	0	0	0	0	0	0	0	0	0	0	0	0	0	0	0	0	0	0	0	0	0	0	0	0	0	0	0	0	0
12398	Mbd1	0.05	0	0	Inf	1	Cluster Enriched	0.000388725	0.1	0.1	0.2	0	0.05	0.04	0	0.07	0.07	0.05	0	0.07	0	0	0	0	0	0	0	0	0	0	0	0	0.02	0	0.02	0	0	0	0	0	0	0	0	0	0	0	0	0	0
226043	Meis1	0.01	0	0	Inf	1	Cluster Enriched	0.276957	0	0.02	0.08	0	0	0	0	0	0	0	0	0	0	0	0	0	0	0	0	0	0	0	0	0	0	0	0	0	0	0	0	0	0	0	0	0	0	0	0	0	0
12479	Npc2	54.17	21.76	13.36	2.48943	1	Cluster Enriched	0.0521595	0	3.16	241.89	142.18	67.45	24.46	126.2	60.29	26.2	0.66	90.85	13.19	0	1.47	14.58	1.03	0	23.29	4.9	3.42	4.33	6.03	76.1	79.37	2.82	4.53	55.32	13.65	34.43	30.13	1.34	7.19	31.08	10.65	18.21	23.45	3.09	4.62	3.28	2.3	26.56
12490	Nrp1	0.01	0	0	Inf	1	Cluster Enriched	0.245586	0.02	0	0.03	0	0.04	0.04	0	0	0	0	0	0	0	0	0	0	0	0	0	0	0	0	0.01	0.01	0	0	0	0.04	0.01	0	0	0	0	0	0	0	0	0	0	0	0
12505	Pkig	0.02	0	0	Inf	1	Cluster Enriched	0.206524	0	0	0	0	0.12	0.24	0	0	0	0	0	0	0	0	0	0	0	0	0	0	0	0	0	0	0	0	0	0	0	0	0	0	0	0	0	0	0	0	0	0	0
17064	Podxl	0.14	0	0.03	4.66667	1	Cluster Enriched	0.000341358	0.37	0.17	0.4	0.14	0.17	0.27	0.08	0.05	0.11	0	0.06	0.11	0.1	0.05	0.05	0	0	0	0	0	0	0	0	0	0	0	0	0	0	0	0	0	0	0	0	0	0	0	0	0	0
26364	Ppp1r18	0.02	0	0	Inf	1	Cluster Enriched	0.0314714	0.02	0.03	0.13	0	0.03	0.02	0.01	0.02	0.01	0	0	0	0	0	0	0	0	0	0	0	0	0	0	0	0	0	0	0	0	0	0	0	0	0	0	0	0	0	0	0	0
12562	Psip1	1.29	0.64	0.42	2.01562	1	Cluster Enriched	8.76e-07	2.12	0.96	2.85	1.13	1.49	1.38	1.35	1.06	0.78	1.45	1.14	1.16	0.6	1.03	0.83	0.97	1.08	0.78	0.18	0.45	0.79	0.35	0.35	0.58	0.91	0.55	0.69	0.22	0.43	0.57	0.5	0.87	0.51	0.43	0.48	0.4	0.52	0.47	0.47	0.17	0.39
110911	Pstpip1	0.01	0	0	Inf	1	Cluster Enriched	0.373481	0	0	0	0	0	0	0	0.16	0.01	0	0	0	0	0	0	0	0	0	0	0	0	0	0	0	0	0	0	0	0	0	0	0	0	0	0	0	0	0	0	0	0
73139	Rassf2	0.01	0	0	Inf	1	Cluster Enriched	0.2902	0	0	0	0	0	0	0	0.08	0.05	0	0	0	0	0	0	0	0.02	0.03	0	0	0	0	0	0	0	0	0	0	0	0	0	0	0	0	0	0	0	0	0	0	0
545389	Rbpj	0.06	0.02	0	3	1	Cluster Enriched	0.00586078	0.16	0.01	0.12	0	0	0	0.26	0.02	0.03	0.02	0.04	0.04	0.03	0.07	0.04	0.05	0.04	0	0	0	0	0	0	0	0.08	0	0.02	0	0	0	0	0	0	0	0	0	0	0	0	0	0
26370	Samsn1	0.02	0	0	Inf	1	Cluster Enriched	0.174337	0.16	0	0.15	0	0	0	0	0	0	0	0	0	0	0	0	0	0	0	0	0	0	0	0	0	0	0	0	0	0	0	0	0	0	0	0	0	0	0	0	0	0
12654	Sash3	0.02	0	0	Inf	1	Cluster Enriched	0.000358169	0	0	0	0.04	0.04	0.06	0.03	0	0.01	0.06	0.02	0.05	0	0	0	0	0	0	0	0	0	0	0	0	0	0	0	0	0	0	0	0	0	0	0	0	0	0	0	0	0
114584	Sh3kbp1	0.02	0	0	Inf	1	Cluster Enriched	0.226855	0	0	0	0	0	0	0.01	0.22	0	0	0.02	0.02	0.01	0.01	0	0	0	0	0	0	0	0	0	0	0	0	0	0	0	0	0	0	0	0	0	0	0	0	0	0	0
12798	Sirt7	0.01	0	0	Inf	1	Cluster Enriched	0.206442	0	0	0	0.03	0.06	0	0	0	0	0	0	0	0	0	0	0	0	0	0	0	0	0	0	0	0	0	0	0	0	0	0	0	0	0	0	0	0	0	0	0	0
12721	Sox6	0.04	0	0	Inf	1	Cluster Enriched	0.00584618	0.01	0.21	0.01	0.05	0.06	0.04	0.07	0.03	0	0.01	0	0.03	0.01	0	0.01	0	0	0	0	0	0	0	0	0	0	0	0	0	0	0	0	0	0	0	0	0	0	0	0	0	0
12870	Spast	0.01	0	0	Inf	1	Cluster Enriched	0.00848943	0.02	0.03	0.03	0	0	0	0	0	0	0	0	0	0.02	0.04	0	0	0	0	0	0	0	0	0	0	0	0	0	0	0	0	0	0	0	0	0	0	0	0	0	0	0
12946	Tgfb1	0.14	0.02	0	7	1	Cluster Enriched	0.0418122	0.14	0.02	0.17	0.09	0.21	0.1	1	0.06	0.15	0	0	0	0.04	0.07	0	0	0	0	0	0	0	0	0	0	0	0.13	0.07	0	0	0	0	0	0	0	0	0	0	0	0	0	0
13007	Tmem40	0.08	0	0	Inf	1	Cluster Enriched	0.176504	0	0	0	0	0	0	0	0	0	0.66	0.55	0	0	0	0	0	0	0	0	0	0	0	0	0	0	0	0	0	0	0	0	0	0	0	0	0	0	0	0	0	0
13032	Txlng	0.05	0	0	Inf	1	Cluster Enriched	0.00012787	0.09	0.02	0.04	0.04	0.11	0.07	0	0	0	0	0	0	0.15	0.1	0.09	0	0	0	0	0	0	0	0	0	0	0	0	0	0	0	0	0	0	0	0	0	0	0	0	0	0
13040	Unc13d	0.07	0	0	Inf	1	Cluster Enriched	2.46e-10	0.08	0.08	0.11	0.17	0.07	0.09	0.04	0.03	0.06	0.05	0.08	0.05	0.11	0.03	0.03	0.03	0.02	0.01	0	0	0	0	0	0	0	0	0	0	0	0	0	0	0	0	0	0	0	0	0	0	0
13047	Vamp5	1.2	0	0	Inf	1	Cluster Enriched	0.000671433	0.3	0.39	3.06	4.34	1.83	1.43	0	0	0	0.26	3.06	0	0.21	0.37	2.81	0	0	0	0	0	0	0	0	0	0	0	0	0	0	0	0	0	0	0	0	0	0	0	0	0	0
104086	Wbp4	0.01	0	0	Inf	1	Cluster Enriched	0.18535	0	0	0	0	0.08	0.12	0	0	0	0	0	0	0	0	0	0	0	0	0	0	0	0	0	0	0	0	0	0	0	0	0	0	0	0	0	0	0	0	0	0	0
13088	Wipf1	0.07	0.03	0	2.33333	1	Cluster Enriched	0.0192492	0	0.12	0.21	0.15	0	0.28	0	0	0	0	0	0	0	0.12	0.14	0	0	0	0.06	0.01	0.16	0.08	0	0.09	0	0	0	0	0	0	0	0	0	0	0	0	0	0	0	0	0
102294	Ypel5	0.34	0.13	0.08	2.61538	1	Cluster Enriched	0.0105882	0.08	0	0.18	0.73	0.95	0.11	0.87	0.53	0.5	0.1	0.4	0.11	0	0.23	0.24	0.34	0.12	0.41	0	0	0	0	0	0	0.25	0.32	0.07	0.29	0.12	0	0.23	0.51	0	0	0	0	0	0	0	0.18	0.11
13123	Zeb2	0.01	0	0	Inf	1	Cluster Enriched	0.020046	0.01	0.01	0.03	0	0.02	0.01	0	0	0	0	0	0	0	0	0	0	0	0	0	0	0	0	0	0	0	0	0	0	0	0	0	0	0	0	0	0	0	0	0	0	0
72318	Abhd5	0	0.09	0.02	4.5	2	Cluster Enriched	0.00229264	0	0	0	0	0	0	0	0	0	0	0	0	0	0	0	0	0	0	0.15	0.13	0	0	0.07	0.08	0.24	0.19	0.19	0.14	0.07	0.18	0	0	0	0	0	0	0	0	0	0	0
13167	Anxa1	2.52	8.28	2.68	3.08955	2	Cluster Enriched	2.78e-05	0.59	0.48	1.13	0.63	0.88	0.34	1.24	6.25	4.32	1.82	2.24	4.61	1.5	1.44	10.32	3.11	5.54	11.12	8.82	11.53	12.49	5.79	3.43	12.21	7.62	8.64	9.06	4.29	4.11	8.15	6.8	8.16	7.03	1.66	1.45	1.74	0.48	1.18	1.11	0.3	0.17
28199	Calcrl	0	0.02	0	Inf	2	Cluster Enriched	0.1195	0	0	0	0	0	0	0	0	0	0	0	0	0	0	0	0	0	0	0	0	0	0.07	0.15	0	0	0	0	0	0	0	0	0	0	0	0	0	0	0	0	0	0
230073	Gnb4	0	0.23	0	Inf	2	Cluster Enriched	0.0894932	0	0	0	0	0	0	0	0	0	0	0	0	0	0	0	0	0	0	1.49	0	1.22	0	0	0	0	0	0	0	0	0	0	0	0	0	0	0	0	0	0	0	0
192119	Gpc6	0	0.03	0.01	3	2	Cluster Enriched	0.100821	0	0	0	0	0	0	0	0	0	0	0	0	0	0	0	0.04	0.01	0	0.04	0.02	0	0	0.14	0.02	0	0.04	0.05	0	0	0	0	0.17	0.02	0	0	0	0	0	0	0	0
13405	Ifit3	0	0.06	0.02	3	2	Cluster Enriched	0.0611609	0	0	0	0	0	0	0	0	0	0	0	0	0	0	0	0	0	0	0.03	0.07	0	0.03	0.07	0.11	0	0.31	0.05	0	0	0	0	0.18	0.04	0	0	0	0	0.04	0.01	0	0
210293	Lsp1	0.39	2.37	1.04	2.27885	2	Cluster Enriched	0.0753892	0.19	0.08	0.23	0.23	0.11	0.25	0.09	0.61	0.67	0.87	0.11	0.63	0.27	0.23	1.25	0.91	1.32	1.27	0.44	1.42	0.78	0.94	0.88	4.89	0.58	10.08	4.96	0.48	0.64	6.24	1.23	7.46	1.06	0.24	0.58	0.11	0.19	0	0.15	0	0
94176	Mmrn2	0	0.01	0	Inf	2	Cluster Enriched	0.01946	0	0	0	0	0	0	0	0	0	0	0	0	0	0	0	0	0	0	0	0	0	0.01	0.03	0	0.01	0.01	0.06	0	0	0	0	0	0	0	0	0	0	0	0	0	0
76088	Myadm	0.32	2.3	0.7	3.28571	2	Cluster Enriched	2.33e-07	0.05	0	0.3	0.17	0.1	0.08	0.36	0.49	0.3	0.24	0.38	0.49	0.24	0.3	1.26	0.93	0.95	3.28	3.71	2.8	2.46	1.72	3.43	1.32	3.12	2.65	1.19	0.89	0	1.6	1.46	0.59	0.95	0	2.45	1.56	0.36	0	0.19	0.28	1.76
13448	Ncf4	0.07	0.21	0.08	2.625	2	Cluster Enriched	0.0709218	0	0	0	0	0	0	0.03	0.1	0.08	0.03	0.2	0.08	0.25	0.15	0.1	0.02	0.23	0.21	0.23	0.3	0.31	0.05	0.32	0.16	0	0.56	0.13	0.04	0.06	0.22	0.83	0.13	0.14	0	0	0	0	0	0	0	0
22240	Ndst1	0	0.63	0.17	3.70588	2	Cluster Enriched	0.0141742	0	0	0	0	0	0	0	0	0	0	0	0	0	0	0	0.41	0.94	0.12	3.17	0.05	0	0.01	0.11	0.37	1.23	1.15	0.05	0.01	0.09	0.48	0.18	1.17	0.05	0.08	0.13	0.22	0.03	0.05	0	0.01	0.2
209200	Npnt	0	0.08	0.01	8	2	Cluster Enriched	0.334408	0	0	0	0	0	0	0	0	0	0	0	0	0	0	0	0	0	0	0.99	0.01	0.01	0	0	0	0	0	0	0	0	0	0	0.12	0.06	0	0	0	0	0	0	0	0
52665	Plin2	0.2	6.71	2.68	2.50373	2	Cluster Enriched	0.00483516	0.14	0.02	0.37	0.06	0.08	0.15	0.06	0.16	0.23	0.82	0.12	0.17	0.22	0.12	0.23	0.06	0.17	0.24	0.49	1.37	0.82	7.22	7.3	24.79	17.93	8.82	11.27	8.96	5.06	4.85	5.12	2.19	5.39	0.23	0.59	0.7	0.1	3.78	0.11	0.64	0.85
13628	Prkg1	0	0.01	0	Inf	2	Cluster Enriched	0.119387	0	0	0	0	0	0	0	0	0	0	0	0	0	0	0	0	0.02	0.01	0	0	0	0	0	0	0.01	0.03	0	0	0	0	0	0.02	0.02	0	0	0	0	0	0	0	0
13631	Prtn3	1.64	3.54	0.5	2.15854	2	Cluster Enriched	4.35e-06	0	0	0	0.19	0.33	0.15	1.57	3.16	2.35	2.44	2.4	3.95	2.06	1.17	4.87	1.96	3.43	6.81	2.77	5.42	4.62	3.25	2.15	3.74	3.77	2.46	2.12	2.51	1.48	2.41	1.14	0.51	1	0	0	0	0	0	0	0	0
66235	Rcsd1	0	0.28	0	Inf	2	Cluster Enriched	0.068735	0	0	0	0	0	0	0	0	0	0	0	0	0	0	0	0.04	0.01	0.07	0	2.18	0.11	0	0	0	0	0.46	0.5	0	0	0	0	0	0	0	0	0	0	0	0	0	0
13805	Shank3	0	0.05	0.01	5	2	Cluster Enriched	0.345885	0	0	0	0	0	0	0	0	0	0	0	0	0	0	0	0	0	0	0	0	0	0	0	0	0	0.53	0.02	0	0	0	0.02	0	0.1	0	0	0	0	0	0	0	0
13808	Slc44a2	0.01	0.03	0	3	2	Cluster Enriched	0.0881759	0.03	0	0.07	0	0	0	0	0	0	0.02	0	0.02	0.02	0.02	0	0	0	0	0	0	0	0.03	0	0.17	0	0.05	0.06	0	0	0	0	0	0	0	0	0	0	0	0	0	0
224794	Stk10	0.28	0.81	0.12	2.89286	2	Cluster Enriched	0.144828	0.07	0.02	0.29	0.01	0.35	0.03	0.03	0.68	0.43	0.02	0.11	1.93	0.12	0.07	0.04	0.12	0.03	4.17	0.06	0.07	4.02	0.03	0.28	0.16	0.22	0.27	0.24	0.04	1.03	0.49	0.11	0.31	0.18	0	0	0	0	0	0	0	0
12499	Tgfb1i1	0	0.04	0.01	4	2	Cluster Enriched	0.00530841	0.01	0	0.02	0	0	0	0	0	0	0	0	0	0.02	0	0.02	0	0.02	0.03	0.03	0.04	0.13	0	0.04	0.04	0.05	0.06	0.04	0.09	0	0.03	0.08	0	0.03	0	0	0	0	0	0	0	0
226352	Themis2	0	0.18	0	Inf	2	Cluster Enriched	0.0782842	0	0	0	0	0	0	0	0	0	0	0	0	0	0	0	0	0	0	0	0	0	0	0.02	1.01	0.05	0	1.04	0	0	0	0	0.08	0.01	0	0	0	0	0	0	0	0
80898	Vav1	0.03	0.13	0.01	4.33333	2	Cluster Enriched	0.0540927	0.04	0.03	0	0.06	0.01	0.04	0	0.03	0.09	0.01	0.03	0.05	0	0	0	0.03	0	0.84	0.15	0.1	0.17	0.01	0.01	0.2	0	0	0	0.03	0	0.01	0	0.05	0.01	0	0	0	0	0	0	0	0
69524	4931406C07Rik	0.31	2.64	14.87	5.63258	3	Cluster Enriched	9.04e-16	0.18	0.13	0.13	0.16	0.1	0.29	0.23	0.56	0.3	0.32	0.39	0.53	0.58	0.22	0.59	0.64	0.44	1.2	1.05	0.98	0.64	1.47	3.12	2.8	6.7	7.41	5.27	8.87	7.37	9.4	16.34	13.5	12.05	17.16	19.47	17.96	15.18	21.1	20.97	14.74	16.48
23943	Abat	1.04	14.67	34.11	2.32515	3	Cluster Enriched	0.000214021	2.19	1.91	0.16	0.11	0.15	0.2	0.54	0.61	0.87	0.77	0.93	1.14	1.22	1.64	3.14	1.79	2.64	7.15	5.79	15.17	2.26	8.44	2.8	26.73	77.73	22.61	2.9	1.99	41.25	8.1	14.4	9.28	4.43	50.29	27.52	50.57	8.74	75.79	45.64	66.95	33.8
14082	Abcb1a	0	0.03	0.09	3	3	Cluster Enriched	0.367738	0	0	0	0	0	0	0	0	0	0	0	0	0	0	0	0	0	0	0	0	0	0	0.03	0.13	0	0.15	0.04	0	0	0	1.2	0.24	0.09	0.05	0.01	0.1	0	0	0	0	0
215512	Abhd2	0	0.06	0.2	3.33333	3	Cluster Enriched	0.00675966	0	0	0	0	0	0	0	0	0	0	0	0	0	0	0	0	0	0	0	0	0	0.04	0	0.07	0.29	0.13	0.16	0.57	0.36	0.62	0.37	0.43	0.68	0.09	0.02	0.23	0.03	0.19	0	0	0
75687	Abhd4	0	0	0.03	Inf	3	Cluster Enriched	0.0974247	0	0	0	0	0	0	0	0	0	0	0	0	0	0	0	0	0	0	0	0	0	0	0	0	0	0	0	0	0	0	0	0	0	0	0	0	0	0	0	0.11	0
14121	Acy3	0.12	0.4	3.89	9.725	3	Cluster Enriched	1.24e-09	0.06	0	0.03	0.09	0.08	0.03	0.06	0.18	0.15	0.13	0.12	0.22	0.28	0.12	0.24	0.28	0.23	0.1	0.29	0.32	0.23	0.39	0.53	0.29	0.74	0.93	0.48	1.28	1.1	1.41	2.15	2.63	1.06	4.38	3.4	4.61	7.57	6.15	4.44	3.73	7.07
106052	Agpat2	0.04	0.59	3.46	5.86441	3	Cluster Enriched	3e-08	0	0	0	0	0	0	0.1	0.06	0.05	0	0.14	0.04	0.04	0	0.1	0.08	0.28	0.13	0.79	0.72	0	0.54	0.85	0.43	1.24	1.05	0.99	1.61	1.12	5.4	1.87	7.11	2.5	2.61	1.63	5.42	4.42	7.64	5.83	3.56	2.78
108101	Aifm2	0	0.09	0.52	5.77778	3	Cluster Enriched	0.00017476	0	0	0	0	0	0	0	0	0	0	0	0	0	0	0	0	0	0	0.07	0.14	0	0	0	0	0.2	0.17	0.54	0	0.78	0.11	0.54	0.23	1.37	0.13	1.47	1.21	0.14	0.67	0	0	0.34
14199	Aqp1	0.36	1.24	3.69	2.97581	3	Cluster Enriched	8.13e-10	0.24	0.13	0.15	0	0	0	1.4	1.07	0.79	0	0	0	0	0.76	0.86	0	0.87	0.89	0	1.06	0.7	2.16	3	1.32	0	2.91	1.95	3.47	3.19	2.49	3.65	4.1	5.28	3.53	3.81	6.25	2.58	3.29	6.86	2.49	3.65
338355	B2m	0	0	1.01	Inf	3	Cluster Enriched	0.0108629	0	0	0	0	0	0	0	0	0	0	0	0	0	0	0	0	0	0	0	0	0	0	0	0	0	0	0	0	0	0	0	0	0	2.88	3.41	0	0	0	0	0	2.73
192176	C1ra	0	0	0.02	Inf	3	Cluster Enriched	0.0152401	0	0	0	0	0	0	0	0	0	0	0	0	0	0	0	0	0	0	0	0	0	0	0	0	0	0	0	0	0	0	0.11	0	0.03	0	0	0	0	0	0	0.06	0.07
55990	Casp8	0.19	0.43	1.12	2.60465	3	Cluster Enriched	3.42e-06	0.12	0.05	0.2	0.49	0.06	0.13	0.08	0.36	0.32	0.15	0.22	0.2	0.27	0.1	0.13	0.04	0.23	0.18	0.19	0.35	0.18	0.43	0.59	0.35	0.96	0.94	0.77	1.5	1.09	2.32	0.95	2.52	1.25	1.17	0.87	1.82	1.12	0.84	1.07	0.32	1.37
14262	Cd1d1	0	0.04	0.38	9.5	3	Cluster Enriched	0.000227429	0	0	0	0	0	0	0	0	0	0	0	0	0	0	0	0	0	0	0	0	0	0	0	0	0.03	0.12	0.31	0	0.02	0.13	0	0.28	0.54	0	0.11	0.22	0	0.43	0.55	0.43	1.39
23880	Cds2	0	0.02	0.12	6	3	Cluster Enriched	0.000803862	0	0	0	0	0	0	0	0	0	0	0	0	0	0	0	0	0	0	0	0	0	0	0	0	0	0.09	0.14	0	0	0	0.06	0.11	0.23	0.5	0.14	0.23	0.08	0	0.18	0	0.14
14469	Cenpv	0.51	0.56	1.41	2.51786	3	Cluster Enriched	0.0194478	1.31	0.09	0.32	1.76	0.79	1.44	1.37	0.1	0.12	0.08	0	0.01	0.08	0	0.14	0	1.47	0.3	0	0.29	0.08	0.12	3.46	0.08	0.06	0.19	0.7	0.96	1.43	0.13	3.68	0.7	0.65	0.46	2.86	0.62	0.17	2.88	2.03	0.87	0.72
55932	Cp	0	0.4	0.86	2.15	3	Cluster Enriched	9.1e-06	0	0	0	0	0	0	0	0	0	0.05	0	0.01	0	0	0	0.03	0.13	0.12	0.37	0.77	0.09	0.21	0.23	0.16	1.39	0.81	0.47	0.95	0.6	1.63	2.04	2.11	0.97	0.9	0.77	1.12	0.49	0.65	0.73	0.38	0.39
229900	Ctss	0.01	0.08	0.21	2.625	3	Cluster Enriched	0.352117	0	0	0	0	0	0	0	0	0	0	0.04	0.12	0	0	0	0	0	0	0.19	0	0.16	0.19	0.25	0.23	0	0	0	0	0.05	0.96	0	2.29	0.12	0	0	0	0	0	0	0.18	0.11
14544	Cyp27a1	0	0.32	5.18	16.1875	3	Cluster Enriched	0.000176407	0	0	0	0	0	0	0	0	0	0	0	0	0	0	0	0	0	0	0.09	0.09	0	0.25	0.4	0.4	0.67	0.8	1.17	0.34	0.42	0.26	2.29	0.6	0.47	1.12	0.44	1.23	4.61	5.98	7.27	8.75	10.34
14582	Cyp2b10	0	0	1.68	Inf	3	Cluster Enriched	0.123058	0	0	0	0	0	0	0	0	0	0	0	0	0	0	0	0	0	0	0	0	0	0	0	0	0	0	0	0	0	0	0	0	0	0	3.7	1.49	15.66	1.11	1.74	0	1.31
384009	Cyp4v3	0	0.01	1.2	120	3	Cluster Enriched	0.000386042	0	0	0	0	0	0	0	0	0	0	0	0	0	0	0	0	0	0	0	0	0	0	0	0	0	0.09	0.08	0.04	0.26	0.43	0.07	0.36	0.11	0.95	0.53	0.88	0.66	0.8	0.78	1.76	1.29
14667	Cyp7b1	0	0	1.31	Inf	3	Cluster Enriched	0.135642	0	0	0	0	0	0	0	0	0	0	0	0	0	0	0	0	0	0	0	0	0	0	0	0	0	0	0	0	0	0	0	0	0	0	0	0	0	0	0	0.24	0
14678	Cyth4	0	0	0.01	Inf	3	Cluster Enriched	0.393773	0	0	0	0	0	0	0	0.02	0.01	0	0	0	0	0	0	0	0	0	0	0	0	0	0	0	0	0	0	0.05	0	0.09	0	0	0	0	0	0	0	0	0	0	0
14696	Dcaf11	0.07	0.08	0.65	8.125	3	Cluster Enriched	1.06e-07	0.05	0.01	0.12	0.03	0.06	0.04	0.07	0.05	0.08	0.07	0.06	0.17	0.02	0.06	0.11	0.06	0.06	0.17	0	0.08	0.07	0.04	0.11	0.06	0.14	0.13	0.1	0.36	0.35	0.1	0.14	0.15	0.21	0.65	0.77	0.33	1.29	0.78	0.83	1.04	1.23
237943	Ddx58	0.03	0.31	0.72	2.32258	3	Cluster Enriched	5.5e-07	0	0	0	0	0.01	0.01	0.03	0.08	0.05	0	0.03	0.18	0.01	0	0.09	0.02	0.06	0.14	0.26	0.47	0.08	0.17	0.48	0.62	0.31	0.6	0.55	0.65	0.64	1.63	1	0.79	0.84	0.73	0.43	0.74	0.47	1.71	0.83	0.37	0.33
23888	Dmd	0	0.01	0.08	8	3	Cluster Enriched	0.178677	0	0	0	0	0	0	0	0	0	0	0	0	0.01	0	0.01	0	0.01	0.01	0	0	0	0	0.06	0.03	0.02	0.02	0.02	0.01	0.03	0.03	0.03	0.04	0.78	0.06	0.03	0.02	0.06	0.04	0.03	0.03	0.07
11536	Echdc1	0.46	1.17	4.67	3.99145	3	Cluster Enriched	4.17e-07	0.36	0.45	0.42	1.18	0.11	0.25	0.27	0.33	0.4	0.59	1.12	0.38	0.41	0.33	0.29	0.26	0.58	0.74	1.86	2.61	0.69	1.26	2.44	0.64	0.79	1.44	0.76	1	1.88	1.41	4.37	3.52	1.56	3.74	3.13	2.23	3.09	5.93	5.8	6.75	10.87
14766	Enpp4	0.01	0	0.14	14	3	Cluster Enriched	0.183404	0	0	0	0	0.02	0.02	0.01	0.02	0.03	0	0.03	0.01	0	0	0	0	0	0	0	0.01	0.01	0	0	0	0	0	0	0	0.07	0.08	0	1.04	0.11	0	0	0	0	0	0	0.03	0.03
76238	Entpd5	0.12	0.74	3.06	4.13514	3	Cluster Enriched	3.15e-12	0.03	0.05	0.06	0.04	0.06	0.05	0.11	0.2	0.19	0.29	0.1	0.19	0.16	0.09	0.23	0.21	0.25	0.96	0.56	0.58	0.43	0.44	0.45	0.36	1.93	1.55	1.2	1.64	2.78	2.16	1.94	1.92	2.39	3.76	2.41	2.15	3.93	3.51	2.75	3.58	3.03
69146	Erap1	0.22	0.96	2.8	2.91667	3	Cluster Enriched	6.15e-12	0.2	0.15	0.03	0.15	0.11	0.26	0.21	0.35	0.21	0.32	0.14	0.28	0.19	0.25	0.5	0.49	0.23	0.87	0.97	0.94	0.58	0.59	1.01	0.49	2.42	1.6	1.27	2.65	2.89	3.64	2.33	4.09	3.45	4.63	4.33	3.06	2.63	2.85	2.93	2.17	1.45
60596	Fbp1	1.32	134.83	421.45	3.12579	3	Cluster Enriched	8.91e-15	0	0	0	0	0	0	0.01	3.08	0.34	0.11	0.25	0.97	0.25	0.09	14.64	1.34	3.88	92.57	91.69	94.83	42.72	100.7	167.47	145.06	311.37	272.66	293.66	342.42	450.72	576.27	377.39	526.79	498.94	587.67	427	535.97	359.35	472.59	346.12	521.09	356.11
14964	Fbxo4	0	0	0.01	Inf	3	Cluster Enriched	0.485959	0	0	0	0	0	0	0	0	0	0	0	0	0	0	0	0	0	0	0	0	0	0	0	0	0	0	0	0	0	0	0	0	0	0	0	0	0	0	0	0.21	0
14972	Fmo2	0	0	0.26	Inf	3	Cluster Enriched	0.0127148	0	0	0	0	0	0	0	0	0	0	0	0	0	0	0	0	0	0	0	0	0	0	0	0	0	0	0	0	0	0	0	0	0	0.07	0.33	0.96	0.17	1.1	1.14	0	0.12
15007	Fmo3	0	0	5.9	Inf	3	Cluster Enriched	0.0309524	0	0	0	0	0	0	0	0	0	0	0	0	0	0	0	0	0	0	0	0	0	0	0	0	0	0	0	0	0	0	0	0	0	0	0.15	1.53	8.77	27.69	23.88	0.25	23.4
14651	Gbp2	0.02	0.05	0.5	10	3	Cluster Enriched	0.00882143	0	0	0	0	0	0	0	0.09	0.09	0.01	0.01	0	0	0.01	0.03	0	0	0	0.02	0.1	0.03	0.01	0.02	0.07	0.12	0.1	0.1	0.38	0.92	2.19	0.06	2.22	0.96	0.56	0.07	0.42	0.06	0.12	0.36	0	0.42
15130	Gbp3	0	0.01	0.06	6	3	Cluster Enriched	0.0301929	0	0	0	0	0	0	0	0.01	0.01	0	0	0	0	0	0	0	0	0	0	0	0	0.01	0	0.01	0	0.01	0.04	0.09	0.04	0.38	0	0.24	0.08	0.02	0.02	0.05	0	0.09	0.06	0	0
15139	Gbp7	0.02	0.16	0.63	3.9375	3	Cluster Enriched	0.0170175	0.01	0	0.01	0	0.05	0.01	0.03	0.02	0.03	0.03	0.01	0.03	0.02	0.01	0.04	0.03	0.02	0.06	0.13	0.24	0.09	0.14	0.18	0.14	0.34	0.34	0.23	0.71	0.59	3.48	0.16	2.13	0.57	0.23	0.37	0.21	0.11	0.43	1.23	0.3	0.2
15163	Gda	0	0.18	0.76	4.22222	3	Cluster Enriched	0.0472583	0	0	0	0	0	0	0	0	0	0.02	0	0.02	0	0	0	0	0.05	0.12	0.24	0.21	0.07	0	1.27	0.08	0.06	0	0.12	0	0.02	0.08	5.44	0	0.03	0.11	0.05	0.12	0.72	0.59	0.57	0.72	1.32
15183	Gpr182	0.03	0.19	0.87	4.57895	3	Cluster Enriched	0.105117	0	0	0	0.09	0.1	0.03	0.03	0.14	0.09	0	0	0	0	0	0	0	0	0	0.02	1.03	0	0	0	0	0.15	0	1.03	0	0.52	4.67	0	0	0	0.61	2.22	0	0	0	0	5.62	0
58875	Grhpr	5.73	44.67	114.06	2.55339	3	Cluster Enriched	3.22e-06	4.15	2.92	6.26	2.83	2.21	1.98	4.27	6.61	5.23	7.85	6.82	6.46	5.65	5.24	17.53	12.16	11.42	26.15	30.88	36.14	16.53	26.25	44.59	52.86	126.51	79.69	72.87	82.8	107.48	119.8	170.46	101.39	110.88	221.02	331.18	164.83	132.36	97.56	92.78	67.17	39.9
70719	H2-D1	0.1	0.32	1.48	4.625	3	Cluster Enriched	3.24e-09	0	0	0	0.08	0.17	0.01	0.17	0.24	0.19	0	0.14	0.28	0.15	0	0.07	0	0.12	0.09	0.32	0.68	0.13	0.28	0.17	0.5	0.41	0.6	0.51	1.42	1.66	3.41	1.75	3.03	1.53	1.79	1.03	1.28	0.62	1.65	1.26	0.68	0.81
74318	H2-K1	0.04	0.25	1.72	6.88	3	Cluster Enriched	3.72e-09	0.03	0	0.02	0	0.02	0.01	0.05	0.12	0.06	0.05	0.05	0.08	0.04	0.02	0.07	0.16	0.05	0.15	0.38	0.5	0.17	0.18	0.26	0.11	0.35	0.33	0.34	1.63	0.65	3.74	0.86	3.56	1.01	0.9	0.5	0.7	2.14	2.64	2.2	1.93	2.02
15439	H2-Q10	0.08	0.36	1.11	3.08333	3	Cluster Enriched	1.18e-05	0	0	0	0.14	0.01	0.04	0.04	0.14	0.09	0.03	0.13	0.21	0.08	0.11	0.25	0.08	0.16	0.48	0.4	0.61	0.4	0.18	0.48	0.11	0.31	0.67	0.38	0.68	0.64	0.72	0.33	0.86	0.34	0.46	0.41	0.19	1.25	1.75	2.26	1.11	1.54
101502	Hagh	0.63	3.03	20.86	6.88449	3	Cluster Enriched	8.81e-10	0.38	0.25	0.45	0.31	0.67	0.49	0.49	1.06	0.85	0.6	0.45	0.95	0.53	0.78	1.2	0.7	0.52	3.33	2.51	3.05	2.85	2.59	4.39	3.75	4.34	4.76	3.59	3.85	10.09	8.76	10.81	8.8	8.15	18.04	20.3	18.96	26.53	36.44	20.43	31.26	25.6
72630	Hc	0	0.05	0.15	3	3	Cluster Enriched	9.04e-07	0	0	0	0	0	0	0	0	0	0.04	0.01	0.02	0	0	0	0.01	0	0.09	0	0.02	0.01	0	0	0	0.05	0.14	0.26	0.1	0.13	0.3	0.24	0.15	0.22	0.23	0.04	0.12	0.18	0.11	0.2	0.11	0.01
15896	Hibadh	0.5	3.28	24.2	7.37805	3	Cluster Enriched	1.45e-11	0.4	0.4	0.62	0.11	0.61	0.24	0.71	0.8	0.46	0.6	0.1	0.84	0.56	0.36	0.7	1.12	0.56	1.92	1.83	2.49	0.93	1.54	2.53	2.98	10.19	7.92	5.37	8.44	8.15	10.37	12.92	14.7	13.12	31.03	26.4	29.8	23.73	42.67	30.18	27.33	33.67
70110	Hopx	0	0	0.06	Inf	3	Cluster Enriched	0.318784	0	0	0	0	0	0	0	0	0	0	0	0	0	0	0	0	0	0	0	0	0	0	0	0	0	0	0	0	0	0	0	0	0	0	0	0	0	0	0	0	0
15953	Hp	0.42	6.81	15.08	2.21439	3	Cluster Enriched	4.16e-07	0	0	0	0	0	0	0.04	1.29	0.9	0.17	0	0.69	0.01	0.15	3.03	0.35	1.1	5.01	7.03	9.36	4.19	2.66	5.11	5.02	16.77	11.94	13.2	18.13	17.82	30.78	20.34	22.98	10.95	7.08	21.56	31.97	3.93	11.94	10.87	7.21	8.98
71586	Hsd3b7	0	0.21	1.08	5.14286	3	Cluster Enriched	2.15e-09	0	0	0	0	0	0	0	0	0	0	0	0	0	0	0	0	0	0	0.04	0.19	0.15	0.04	0.36	0.15	0.46	0.63	0.46	1.07	0.46	1.2	1.95	1.03	1.82	1.39	1.05	2.4	0.72	0.82	1.07	0.39	1.38
15957	Icam2	0	0	0.01	Inf	3	Cluster Enriched	0.310742	0	0	0	0	0	0	0	0	0	0	0	0	0	0	0	0	0	0	0	0	0	0	0	0	0	0	0	0.13	0	0.06	0	0	0	0	0	0	0	0	0	0	0
15959	Ifi35	0.01	0.52	1.22	2.34615	3	Cluster Enriched	0.000263173	0	0	0	0	0	0	0	0.03	0.08	0	0	0	0	0.01	0.05	0	0.01	0.1	0.79	0.06	0.18	1.8	1.25	0.21	0.24	0.34	1.31	0.76	0.64	1.07	3.84	1.32	0.74	0.38	0.53	2.18	3.25	1.67	1.58	0.53	0.11
16145	Ifi47	0.09	1.45	5.38	3.71034	3	Cluster Enriched	0.000233895	0.02	0.03	0.15	0.05	0.05	0.11	0.04	0.15	0.08	0.04	0.09	0.2	0.02	0.05	0.21	0.04	0.06	0.73	1.99	2.22	1.1	0.79	0.89	0.43	2.14	4.83	2.17	7.57	7.35	17.48	6.82	16.51	6.08	5.94	7.69	5.1	1.42	1.58	1.14	4.12	3.87
22778	Igtp	0	0.54	2.39	4.42593	3	Cluster Enriched	0.00451878	0	0	0	0	0	0	0.01	0.03	0.01	0	0	0	0	0	0	0	0	0	0.71	0.72	0.26	0.17	0.21	0.16	2.63	0.9	0.74	3.74	3.65	10.67	1.68	8.14	1.45	0.27	0.46	0.53	0.35	4.71	0.8	2.39	1.43
16170	Irgm1	0.13	0.9	2.41	2.67778	3	Cluster Enriched	6.42e-09	0.01	0.05	0.09	0.04	0.07	0.45	0.03	0.4	0.24	0.08	0.08	0.12	0.14	0	0.19	0.2	0.25	0.27	0.59	0.85	1.14	0.61	1.11	0.66	2.34	1.93	0.87	2.54	1.4	4.2	3.76	3.26	2.64	4.09	3.03	1.31	1.45	3.23	0.93	2.07	1.12
29875	Irgm2	0.02	0.42	1.05	2.5	3	Cluster Enriched	0.14557	0	0	0	0	0	0	0.12	0.13	0.03	0	0	0	0	0	0	0.01	0.09	0.26	0.15	0.66	0.25	0.04	0	0.22	0.91	1.09	1.42	0.91	0.53	8.29	1.23	4.78	0.71	0.13	0.38	0.13	0.11	0.7	0.16	0.69	0
15944	Krt18	5.03	23.65	101.95	4.31078	3	Cluster Enriched	3.63e-13	1.73	3.21	3.77	3.91	2.56	4.11	5.12	6.46	6.43	5.11	5.82	8.29	5.21	4.88	8.86	6.6	5.96	23.99	15.89	23.14	13.45	22.99	43.11	17.18	41.55	38.5	31.39	41.35	51.83	58.98	72.03	91.89	74.64	157.64	179.78	94.13	124.09	96.05	105.67	129.72	114.69
54396	Lipe	0	0	0.01	Inf	3	Cluster Enriched	0.115568	0	0	0	0	0	0	0	0	0	0	0	0	0	0	0	0	0	0	0	0	0	0	0	0	0.02	0	0.01	0	0.02	0.02	0.01	0	0.01	0	0	0	0.1	0.01	0	0	0
57444	Lpxn	0	0	0.27	Inf	3	Cluster Enriched	0.513151	0	0	0	0	0	0	0	0	0	0	0	0	0	0	0	0	0	0	0	0	0	0	0	0	0	0	0	0	0	0	0	4.78	0.03	0	0	0	0	0	0	0	0
16399	Mapk9	0.17	0.28	0.83	2.96429	3	Cluster Enriched	0.00621023	0.24	0.14	0.13	0.17	0.2	0.17	0.16	0.16	0.07	0.12	0.22	0.26	0.12	0.1	0.24	0.13	0.14	0.22	0.25	0.24	0.22	0.17	0.51	0.16	0.82	0.28	0.25	1.58	1.96	3.63	1.23	0.9	0.52	0.72	0.51	0.81	0.41	0.49	0.44	0.59	0.11
16401	Mettl7a1	0.16	0.84	5.42	6.45238	3	Cluster Enriched	5.64e-10	0	0	0	0	0	0	0.08	0.34	0.17	0.12	0.11	0.51	0.41	0.1	0.55	0.27	0.34	1.04	1.69	2.22	0.74	0.63	0.39	0.16	0.78	0.89	0.96	1.87	2.44	2.62	2.84	3.78	4.66	4.46	5.69	4.92	4.47	7.84	8.3	8.83	3.99
16408	Mgst1	2.09	24.85	237.72	9.5662	3	Cluster Enriched	4.67e-06	0	0	0	0	0	0	1.49	3.13	3.76	2.14	2.41	2.71	2.02	2.16	11.51	6.77	4.65	11.54	17.39	19.74	11.6	17.14	24.34	13.28	42.75	39.07	89.9	168.66	83.61	120.76	81	144.3	151.32	151.66	134.36	188.52	85.43	108.48	177.12	459.22	236.26
16414	Mlxipl	0	0	0.04	Inf	3	Cluster Enriched	0.0191324	0	0	0	0	0	0	0	0	0	0	0	0	0	0	0	0	0	0	0	0	0	0	0	0	0	0	0	0	0.02	0.03	0	0	0	0	0	0	0.05	0.03	0	0.29	0.13
20403	Mpdz	0	0	0.02	Inf	3	Cluster Enriched	0.000759776	0	0	0	0	0	0	0	0	0	0	0	0	0	0	0	0	0	0	0	0	0	0	0	0	0	0	0	0.01	0.03	0.09	0.01	0	0.03	0.06	0	0.03	0	0.03	0.04	0	0
16542	Mrpl22	0.27	0.25	0.88	3.25926	3	Cluster Enriched	8.8e-06	0.4	0.24	0.23	0.35	0.12	0.38	0.25	0.35	0.24	0	0.15	0.27	0.17	0.22	0.68	0	0	0	0.3	0.25	0.31	0.25	0.25	0.21	0.69	0.41	0.37	0.29	0.85	1.36	0.61	0.33	1.14	1.12	1.35	1.66	1.29	0.6	0.63	1.69	0.22
16564	Mylk	0.01	0.38	1.79	4.71053	3	Cluster Enriched	0.0126376	0	0	0	0.02	0.01	0.01	0.07	0.01	0.01	0	0.05	0.01	0	0	0	0.07	0.07	0.03	0.03	0.07	0.02	0.02	0.35	0.78	1.86	0.22	1.06	0.11	0.4	1.78	0.12	0.35	2.86	0.94	10.65	0.23	2.88	2.17	2.27	0.12	0.43
16590	Naaa	0	0	0.07	Inf	3	Cluster Enriched	0.0115851	0	0	0	0	0	0	0	0	0	0	0	0	0	0	0	0	0	0	0	0	0	0	0	0	0	0	0	0.04	0.07	0.1	0.15	0.26	0.35	0	0.1	0.16	0	0	0	0	0
16668	Nmi	0.08	0.28	0.74	2.64286	3	Cluster Enriched	5.65e-08	0.01	0	0.05	0	0.2	0.03	0.02	0.13	0.08	0.02	0.24	0.06	0	0.2	0.11	0	0	0	0.28	0.12	0.04	0.57	0.36	0.24	0.35	0.76	0.69	0.95	0.56	0.62	0.48	1.16	0.53	0.64	1.37	0.62	0.6	0.73	1.03	0.41	1.04
18826	Nnmt	0	0	0.51	Inf	3	Cluster Enriched	0.0793672	0	0	0	0	0	0	0	0	0	0	0	0	0	0	0	0	0	0	0	0	0	0	0	0	0	0	0	0	0	0	0	0	0	0	0	0	0	0	0	3.51	2.74
16822	Npepl1	0.28	0.94	1.9	2.02128	3	Cluster Enriched	1.08e-09	0.22	0.13	0.24	0.16	0.25	0.24	0.27	0.37	0.36	0.18	0.18	0.47	0.34	0.23	0.53	0.07	0.42	0.73	0.85	0.72	0.18	1	0.94	1.18	2.29	1.53	1.42	1.48	1.55	1.6	1.86	2.19	2.59	3.05	2.55	1.89	2.88	1.63	1.39	2.27	1.15
19141	Orm1	0	0	0.08	Inf	3	Cluster Enriched	0.306708	0	0	0	0	0	0	0	0	0	0	0	0	0	0	0	0	0	0	0	0	0	0	0	0	0	0	0	0	0	0	0	0	0	0	0	0	0	0	0	0	0
16890	Ormdl3	0.01	0.03	0.15	5	3	Cluster Enriched	0.0693665	0	0.07	0.07	0	0	0	0	0	0	0	0	0	0	0	0	0	0	0	0	0	0	0	0	0	0.31	0	0.1	0.16	0	0.9	0.41	0.4	0.25	0	0	0	0	0	0	0	0
16909	Osbpl1a	0.03	0.09	0.37	4.11111	3	Cluster Enriched	2.33e-07	0.01	0	0.03	0	0.01	0.02	0.01	0.05	0.01	0.02	0.01	0.13	0.01	0.01	0.08	0.01	0.04	0.1	0	0.04	0.17	0.02	0.18	0.13	0.08	0.22	0.13	0.08	0.28	0.14	0.3	0.21	0.13	0.3	0.47	0.36	0.25	0.86	0.6	0.22	0.29
226856	P2rx4	0.01	0.02	0.12	6	3	Cluster Enriched	0.00247329	0	0	0	0	0	0	0	0	0	0	0.17	0.03	0	0	0	0	0	0	0	0	0	0	0	0	0.23	0	0.07	0.11	0.26	0.21	0.21	0.37	0.21	0.07	0	0.16	0.24	0	0.23	0	0
107321	Papss2	0.1	1.95	9.95	5.10256	3	Cluster Enriched	6.56e-07	0	0.03	0.03	0.04	0.03	0.02	0.04	0.22	0.14	0.13	0.2	0.19	0.11	0.1	0.27	0.27	0.36	0.79	1.41	0.87	0.69	2.27	3.6	1.36	3.83	5.49	2.42	11.83	3.83	4.58	7.79	8.72	4.51	13.7	13.93	12.22	8.63	16.11	14.88	5.28	30.32
100604	Parp14	0	0.02	0.09	4.5	3	Cluster Enriched	0.056223	0	0	0	0	0	0	0	0	0	0	0	0	0	0	0	0	0	0	0.04	0.04	0	0	0.01	0.01	0.04	0.07	0.09	0.15	0.16	0.12	0	0.08	0.25	0.64	0.02	0	0.01	0.04	0.02	0	0
16978	Parp9	0.06	0.7	3.7	5.28571	3	Cluster Enriched	1.93e-05	0	0	0	0	0.07	0.11	0.12	0.12	0.08	0.01	0.22	0.07	0.02	0	0.06	0.03	0.02	0.43	0.15	0.17	0.8	0.24	0.21	0.13	4.97	0.69	0.61	0.62	0.31	4.13	8.51	0.82	1.82	8.28	1.45	3.04	3.9	8.93	1.1	5.72	3.05
16985	Pdp2	0	0.01	0.03	3	3	Cluster Enriched	0.216596	0	0	0	0	0	0	0	0	0	0	0	0	0	0	0	0	0	0	0	0	0	0.02	0.06	0	0	0	0	0	0	0	0	0	0	0.14	0	0.3	0	0	0	0	0
17159	Pex3	0.1	0.39	0.85	2.17949	3	Cluster Enriched	0.0024382	0.1	0	0.03	0.13	0	0.02	0.13	0	0.41	0	0	0	0	0.61	0.08	0	0.19	0.89	0.45	0.15	0	0.15	0.3	0.82	0.62	0.25	0.85	2.54	0.79	0.44	0.43	0.2	0.49	0.47	0.34	2.04	2.23	0	0.79	2.06	0.87
26419	Pgap1	0	0.01	0.05	5	3	Cluster Enriched	4.35e-05	0	0	0	0	0	0	0	0	0	0	0	0	0	0	0	0	0	0	0.01	0.04	0	0	0	0	0.04	0.05	0.03	0.13	0.03	0.07	0.16	0.08	0.04	0.09	0.02	0.09	0.04	0	0.04	0.04	0
26420	Prelp	0	0.26	2.83	10.8846	3	Cluster Enriched	0.000462677	0	0	0	0	0	0	0	0	0	0	0	0	0	0	0	0	0	0	0.06	0.18	0.14	0.62	0.22	0.35	0.75	0.47	0.38	0.38	1.04	1	2.09	0.56	1.21	4.29	12.04	1.8	0.99	4.7	1.67	0.81	1.71
17190	Prkaa2	0	0	0.34	Inf	3	Cluster Enriched	0.000103963	0	0	0	0	0	0	0	0	0	0	0	0	0	0	0	0	0	0	0	0	0	0	0	0	0	0	0	0	0.02	0.08	0.15	0	0.04	0.3	0.31	0.28	0.57	0.82	0.48	1.08	0.1
17268	Prodh	0.04	0	3.52	88	3	Cluster Enriched	0.00041117	0	0.03	0.26	0	0.13	0.02	0.03	0.03	0.12	0	0	0	0	0	0	0	0	0	0	0	0	0	0	0	0	0	0	0	0	0	0	0	0	0	0	0	7.71	7.6	7.81	4.49	9.74
56307	Psmb10	0.16	0.79	1.83	2.31646	3	Cluster Enriched	0.00128721	0.13	0	0.13	0	0.1	0.11	0.13	0.38	0.35	0.08	0.13	0.21	0	0.13	0.52	0.18	0	1.27	0.22	2.16	0.22	0	0.42	0.07	3.05	1.22	0.69	2.78	2.53	5.64	1.1	5.81	2.02	1.88	1.82	1.97	0.57	1.54	1.44	0.68	0.49
70152	Psmb8	0.11	0.35	1.7	4.85714	3	Cluster Enriched	4.55e-10	0.06	0.12	0	0	0	0	0.21	0.12	0	0.27	0.33	0.1	0.08	0.02	0.38	0.56	0.33	0.14	0.28	0.6	0	0.49	0.37	0.13	0.27	0.7	0.34	2.74	1.56	2.42	1.99	3.42	1.05	2.57	2.31	1.46	1.78	1.17	1.11	1.81	1.63
56615	Psmb9	0.03	0.06	1.22	20.3333	3	Cluster Enriched	0.000254928	0	0	0	0	0	0	0	0	0	0.09	0.12	0.17	0	0	0	0	0	0	0	0	0	0	0	0	0.19	0.52	0	1.14	1.45	2.91	0.68	4.96	1.53	1.06	1.93	0	0	0	0	0.69	0.99
58805	Rab31	0	0	0.01	Inf	3	Cluster Enriched	0.312416	0	0	0	0	0	0	0	0	0	0	0	0	0	0	0	0	0	0	0	0	0	0	0	0	0	0	0	0	0	0	0	0.11	0.05	0	0	0	0	0	0	0	0
70945	Rabgap1l	0.2	0.15	0.55	2.75	3	Cluster Enriched	0.233834	0.04	0.89	0.14	0.23	0.08	0.65	0.06	0.12	0.54	0.03	0.06	0.04	0.02	0.03	0	0.03	0.03	0.03	0	0.07	0.22	1.07	0.1	0.04	0	0.2	0.03	0.05	0.21	1.01	0.03	0.42	1.15	0.07	0.06	0.03	0.04	0.33	0.02	0.02	0.18
105450	Rarres2	0	0.2	1.12	5.6	3	Cluster Enriched	1.51e-05	0	0	0	0	0	0	0	0	0	0	0	0	0	0	0	0	0	0	0.22	0.16	0	0	0	0	0.92	0.46	0.6	1.14	2.28	1.06	1.56	0.83	0.93	2.19	3.18	2.14	1.79	0.95	0.42	0	0.32
17475	Rbks	0.01	0.04	0.1	2.5	3	Cluster Enriched	0.000849205	0	0	0	0	0	0	0	0	0	0	0.01	0.1	0	0	0	0	0	0	0	0	0	0	0.14	0.03	0.16	0	0.14	0	0.13	0.09	0	0	0	0.18	0	0.19	0.15	0.19	0.23	0.1	0.07
216767	Samd9l	0	0	0.01	Inf	3	Cluster Enriched	0.078282	0	0	0	0	0	0	0	0	0	0	0	0	0	0	0	0	0	0	0	0	0	0	0	0	0	0	0	0.01	0.01	0.1	0	0	0	0.01	0.01	0.05	0.01	0.01	0.01	0	0
50918	Selenbp1	3.73	31.64	110.68	3.4981	3	Cluster Enriched	7.85e-05	0.98	0.96	2.05	1.26	1.73	1.14	2.41	6.58	3.61	4.4	3.26	5.98	3.55	2.48	15.52	9.26	9.4	26.98	39.94	31.16	20.44	34.05	39.36	26.92	64.81	44.3	33.05	37.29	31.71	31.99	49.58	31.75	26.58	70.77	81.85	65.8	147.95	124.74	112.12	172.19	65.3
17874	Serpina3m	0	0.04	1.03	25.75	3	Cluster Enriched	0.0198579	0	0	0	0	0	0	0	0	0	0	0	0	0	0	0	0	0	0	0	0	0	0.01	0.06	0.18	0.13	0	0.08	0	0.04	0.21	0.47	0.22	0.09	0.07	0	0.12	1.01	0.72	0.96	3.21	0
17886	Serpinb9	0.02	0.07	0.24	3.42857	3	Cluster Enriched	9.69e-05	0.02	0.23	0	0	0.02	0.02	0	0.06	0.01	0	0	0	0	0	0	0	0.02	0.02	0	0	0	0.04	0.11	0.02	0.14	0.23	0.24	0.26	0	0.53	0.09	0.47	0.21	0.23	0.34	0.26	0	0.15	0.31	0.11	0.64
107589	Sh3gl2	0	0	0.09	Inf	3	Cluster Enriched	0.128791	0	0	0	0	0	0	0	0	0	0	0	0	0	0	0	0	0	0	0	0	0	0	0	0	0	0	0	0	0	0	0.7	0.5	0	0	0	0	0.22	0.15	0	0	0
246177	Sirt3	0	0.05	0.31	6.2	3	Cluster Enriched	0.000144552	0	0	0	0	0	0	0	0	0	0	0	0	0	0	0	0	0	0	0	0	0	0	0	0	0	0.3	0.26	0	0.37	0.04	0.55	0.79	0.7	0.73	0.71	0.09	0.35	0.21	0.33	0.31	0
72117	Slc31a1	0	0	0.11	Inf	3	Cluster Enriched	0.292973	0	0	0	0	0	0	0	0	0	0	0	0	0	0	0	0	0	0	0	0	0	0	0	0	0	0	0	0	0	0	0	0	0	0	0.72	1.29	0	0	0	0	0
67111	Slc9a3r2	0.02	0.05	0.18	3.6	3	Cluster Enriched	5.7e-05	0.01	0	0.04	0	0	0	0	0.11	0.02	0.05	0	0.1	0	0	0	0	0.07	0.07	0	0	0	0.09	0.18	0.21	0	0	0	0.24	0.14	0.08	0.22	0.06	0.26	0.05	0.53	0.25	0	0.22	0.14	0.15	0.23
17969	Slco2a1	0	0	0.02	Inf	3	Cluster Enriched	0.13708	0	0	0	0	0	0	0	0	0	0	0	0	0	0	0	0	0	0	0	0	0	0	0	0	0	0	0	0	0	0	0	0	0	0	0	0	0	0	0	0	0
17972	Sod3	0.12	0.48	1.13	2.35417	3	Cluster Enriched	0.000727978	0	0	0	0	0	0	0.09	0.4	0	0.33	0.42	0.07	0	0.39	0.12	0.42	0	0.12	0.32	0.25	0.1	0.62	0.24	0.36	1.55	0.72	1.09	1.03	0.75	2.52	0.83	1.59	3.13	0.94	1.13	3.25	0.85	0.2	0.29	0.49	0.77
105855	Sptlc1	0.03	0.01	0.11	3.66667	3	Cluster Enriched	0.183195	0	0	0	0.16	0	0.01	0.06	0.03	0.03	0.02	0.11	0	0.03	0.05	0	0	0	0	0.03	0	0.03	0	0	0	0	0.08	0.03	0.13	0.2	0	0.1	0.27	0.93	0.19	0.04	0.18	0	0	0	0	0
15531	Tap2	0	0.02	0.26	13	3	Cluster Enriched	1.77e-05	0	0	0	0	0	0	0	0	0	0	0	0	0	0	0	0	0	0	0	0	0	0	0	0	0.11	0.12	0.03	0.42	0.13	0.61	0.13	0.91	0.34	0.16	0.19	0.35	0.44	0.21	0.23	0.13	0.04
18033	Tapbp	0.03	0.46	1.45	3.15217	3	Cluster Enriched	9.59e-05	0	0	0	0	0	0	0.08	0.07	0.02	0.02	0.06	0.04	0	0.02	0.07	0.06	0.05	0.2	0.13	0.35	0.13	0.17	0.18	0.7	0.47	1.94	1.14	1.6	0.57	3.22	0.92	3.63	1.54	4.65	0.6	0.8	0.7	1.06	1.65	1.17	0.74
64685	Trim14	0.06	0	0.55	9.16667	3	Cluster Enriched	0.00129849	0	0	0	0	0	0	0.12	0.03	0.68	0	0	0	0	0	0	0	0	0	0	0	0	0	0	0	0	0	0	0	0.59	0.39	0.13	0.14	0.41	0.8	0.7	0.46	0.5	2.46	0.48	0	0.32
18113	Ttc39b	0	0	0.25	Inf	3	Cluster Enriched	0.0915873	0	0	0	0	0	0	0	0	0	0	0	0	0	0	0	0	0	0	0	0	0	0	0	0	0	0	0	0	0	0	0	0	0	0	0	0	0	0	0	0.48	1.63
67963	Ttpa	0.08	1.88	21.52	11.4468	3	Cluster Enriched	0.000162301	0	0	0	0	0	0	0	0.09	0.22	0	0.09	0.18	0.08	0.04	0.52	0.24	0.15	1.09	0.92	1.2	0.78	1.45	2.39	1.65	4.87	5.03	2.79	4.66	23.07	4.65	11.93	60.26	4.47	8.05	5.81	36.41	40.03	16.37	56.28	11.1	13.65
228961	Vnn1	0	0.03	0.09	3	3	Cluster Enriched	0.0679296	0	0	0	0	0	0	0	0	0	0	0	0	0	0	0	0.01	0.02	0	0.01	0.11	0.03	0	0	0	0	0.11	0.06	0.35	0.06	0.08	0	0.59	0.05	0	0	0	0	0	0	0.2	0.09
114249	Xdh	0	0.02	2.4	120	3	Cluster Enriched	6.32e-07	0	0	0	0	0	0	0	0	0	0	0	0	0	0	0	0	0	0	0.01	0	0.03	0	0.04	0.04	0.04	0.06	0.06	0.17	0.21	1.06	0.56	1.36	0.77	0.89	0.76	2.29	3.05	3.45	3.31	4.1	5.88
18186	Zbp1	0	0	0.46	Inf	3	Cluster Enriched	0.233507	0	0	0	0	0	0	0	0	0	0	0	0	0	0	0	0	0	0	0	0	0	0	0	0	0	0	0	0.22	0	3.38	0	4.49	0.1	0.02	0.13	0	0	0	0	0	0
76952	Abca1	0.11	0.15	0.23	1.53333			0.267437	0.01	0.33	0.05	0.06	0.07	0.04	0.08	0.1	0.03	0.04	0.08	0.13	0.18	0.37	0.08	0.06	0.08	0.49	0.08	0.22	0.15	0.03	0.11	0.04	0.3	0.12	0.1	0.21	0.31	0.14	0.58	1.04	0.45	0.14	0.15	0.09	0.63	0.02	0.03	0	0.3
18405	Acp2	0.17	0.22	0.36	1.63636			0.189549	0	0	0	0.29	0.33	0.03	0.48	0	0.67	0.05	0.35	0.06	0.15	0.08	0.12	0.03	0.46	0.12	0	0.06	0.11	0.02	0.15	0.13	0.91	0.41	0.28	0.58	0.54	0.69	0.72	0.99	1.02	0.64	0.21	0.16	0.18	0.22	0.15	0.16	0.02
66612	Agfg1	0.57	0.31	0.22	1.83871			0.00017144	0.43	0.45	1.41	0.5	1.02	0.72	0.44	0.5	0.57	0.45	0.58	0.65	0.34	0.24	0.25	0.2	0.21	0.36	0.6	0.44	0.26	0.17	0.19	0.39	0.17	0.24	0.51	0.2	0.27	0.24	0.23	0.17	0.39	0	0.42	0.4	0.19	0.37	0.25	0.22	0.12
64291	Alcam	0.44	1.3	1.49	2.95455			0.00230145	0.15	0.34	0.39	0.38	0.54	0.49	0.28	0.87	0.33	0.5	0.24	0.56	0.21	0.36	0.91	0.11	0.47	2.1	0.62	1.77	1.82	1.14	2.28	0.8	1.99	1.41	1.1	0.61	2.08	1.46	1.92	4.46	2.17	2.17	2.69	1.93	0.65	1.39	1.81	0.58	0.32
20409	Ankrd44	0.03	0.04	0.04	1.33333			0.692623	0.01	0.03	0.01	0	0.02	0.03	0.01	0.05	0.04	0.06	0.01	0.02	0.01	0.08	0.01	0.02	0.02	0.03	0.02	0.04	0.03	0.01	0	0.14	0	0.07	0.14	0	0.09	0.08	0	0.04	0.21	0.01	0.05	0.26	0	0	0	0	0
229603	Anxa3	0.69	2.4	1.78	2.57971			0.270554	0.33	0.45	0.52	0.7	0.42	0.36	0.27	1	0.71	0.56	1.57	0.74	0.36	0.35	1.94	0.54	0.66	1.26	1.15	0.75	1.52	0.71	4.2	1.31	14.13	1.39	1.13	2.09	0.97	2.07	12.04	1.48	1.55	0.82	0.72	0.48	0.95	1.36	1.05	1.96	0.7
18438	Anxa6	4.68	14.91	19.68	3.1859			6.64e-11	2.48	2.52	4.28	3.97	3.68	3.68	3.3	7.85	6.98	4.12	4.54	5.38	4.51	3.11	9.83	6.52	6.35	14.62	11.6	16.29	12.11	11.57	17.57	17.94	23.55	19.45	21.38	16.63	16.42	26.26	23.83	21.58	22.77	19.12	18.16	24.45	20.79	25.02	27.16	18.84	18.76
224105	Apbb1ip	0.26	0.17	0.05	3.4			2.24e-06	0.13	0.15	0.31	0.3	0.27	0.33	0.45	0.27	0.33	0.11	0.29	0.18	0.19	0.31	0.26	0.13	0.1	0.09	0.16	0.15	0.24	0.09	0.14	0.16	0.18	0.34	0.26	0.08	0	0.38	0.09	0.14	0.21	0	0	0	0	0	0	0	0
75735	Arhgap25	0	0.03	0.02	Inf			0.189069	0	0	0	0	0	0	0	0.01	0.02	0	0	0	0.02	0	0.02	0	0	0	0.03	0.06	0	0.03	0.08	0.03	0.08	0.03	0.06	0.03	0.01	0.03	0	0.22	0.02	0	0	0	0	0	0	0	0
23972	Arhgdib	1.84	3.19	1.63	1.7337			0.0311649	1.13	1	2.2	1.51	1.05	1.26	1.7	3.34	2.7	2.21	1.48	1.77	1.33	1.46	3.51	1.05	2.53	4.24	2.02	6.81	2.75	2.93	3.1	3.67	2.55	4.42	2.18	2.4	2.85	4.2	2.22	6.54	3.99	1.75	1.57	1.54	0.57	0.65	0.99	0	0
547253	Arhgef6	0.03	0.04	0.01	3			0.182652	0.02	0.03	0	0.01	0.01	0	0.26	0.02	0	0.03	0	0.02	0.01	0.01	0.02	0.03	0.03	0.03	0.05	0	0.01	0.09	0.03	0.04	0.06	0.06	0.08	0.05	0.04	0.03	0	0	0	0.02	0.05	0	0.01	0	0.01	0	0
80285	Arpc1b	0.72	1.56	1.7	2.16667			0.000183818	0.52	0.59	0.93	0.53	0.47	0.48	0.49	1.07	0.88	0.88	0.54	1.11	0.64	0.52	1.22	0.67	0.93	1.38	1.42	1.61	0.66	1.2	1.09	1.78	2.56	3.48	1.91	2.41	1.47	2.09	3.01	2.24	2.38	1.96	2.34	1.28	1.37	1.68	1.29	1.86	1.2
13180	C3	0.35	2.58	5.05	7.37143			1.54e-08	0.05	0	0.04	0	0	0	0.15	0.82	0.62	0.3	0.31	0.69	0.25	0.2	1.75	0.58	0.78	4.13	3.07	2.88	2.66	1.53	1.88	1.26	4.88	3.82	3.53	5.66	5.99	12.43	6.34	5.78	5.24	5.09	4.55	5.32	3.6	6.5	5.71	4.18	2.74
74551	Capg	0.71	2.09	1.27	1.78873			0.287897	0.23	0.27	1.13	0.17	1.16	0.23	0.16	2.22	1.22	0.14	0.03	1.21	0.35	0.06	2.11	0.15	0.45	2.25	2.97	3.33	0.75	0.76	0.36	0.75	0.61	3.25	9.46	0.56	0.66	4.47	6.44	2.9	7.57	0.2	0.03	0	0	0	0	0	0
66881	Casp1	0.01	0.02	0.02	2			0.62235	0	0	0	0	0	0	0	0	0	0.01	0	0.1	0	0	0	0	0	0	0.03	0.04	0	0	0	0	0	0.19	0.02	0	0.05	0.17	0.04	0	0.06	0	0	0	0	0	0	0	0
382051	Cbwd1	0.47	0.51	0.29	1.62069			0.66285	0.09	0.05	0.07	0.07	1.67	1.52	0.07	0.05	0.1	0.02	1.45	1.84	0.02	0.07	0.02	0.08	0.01	1.99	0	0.05	2.03	0.02	0.11	0.16	0.05	0.11	1.53	0	0.07	1.51	0.11	0.06	0.12	0.06	0	0.25	0.04	0.03	0	0	0
100710	Cd44	0.42	0.29	0.15	1.93333			0.0195575	0.35	0.56	0.55	0.42	0.22	0.23	0.66	0.41	0.4	0.13	0.37	0.49	0.37	0.58	0.57	0.25	0.45	0.6	0.36	0	0.4	0.27	0.43	0.15	0	0.33	0.26	0.44	0	1.05	0	0.74	0.55	0	0	0	0	0	0	0	0
18613	Cd93	0.02	0.02	0	Inf			0.0409727	0	0	0	0	0.03	0.05	0	0.03	0.04	0	0	0	0.04	0	0.09	0	0	0	0	0.05	0.08	0.05	0	0.06	0	0	0	0	0	0	0	0	0	0	0	0	0	0	0	0	0
56535	Cdh5	0.04	0.07	0.08	1.75			0.502443	0.02	0	0.04	0.12	0.04	0.03	0.02	0.05	0.02	0.05	0.03	0.07	0.02	0.02	0.05	0	0	0	0.02	0.07	0.17	0.03	0.25	0.07	0.11	0.04	0.05	0.11	0.09	0.09	0	0.53	0.12	0.04	0.17	0.04	0	0.06	0.03	0	0
241062	Cetn2	0.18	0.1	0.09	1.8			0.0108321	0.18	0.2	0.44	0.22	0.14	0.36	0.24	0.16	0.26	0.1	0.11	0.15	0.12	0.08	0	0	0.13	0.12	0.08	0.11	0.09	0.07	0.08	0.15	0.1	0.19	0.08	0.06	0.09	0.23	0	0	0	0.18	0.1	0	0.11	0.26	0.19	0	0.06
18718	Clic1	5.23	6.12	3.62	1.17017			0.0108419	5.92	5.22	9.19	4.5	4.89	7.35	5.25	5.58	5.6	3.17	3.85	4.69	4.98	4.08	4.17	3.91	6.43	5.9	4.82	6.44	6.4	5.52	6.01	4.94	7.96	9.51	5.6	5.88	5.16	6.87	6.3	9.65	7.22	3	4.45	2.59	1.44	2.86	1.89	1.1	1.75
18769	Cnn2	1.12	1.16	0.74	1.51351			0.361353	1.42	1.27	2.85	1.35	1.64	1.76	0.5	0.93	0.59	0.26	0.46	0.75	1.15	0.79	1.09	0.17	0.88	1.58	1.26	0.51	0.73	0.21	3.13	0.5	1.56	0.71	2.73	1.36	0.66	2.44	0.92	0.57	3.6	0.14	0.56	0.1	0.74	0.42	1.25	0	0
234779	Coro1a	1.75	3.45	1.59	1.97143			0.000692327	1.39	1.63	2.62	1.02	1.23	1.52	1.38	2.29	2.12	1.77	1.56	2.01	1.5	1.59	2.64	2.09	3.44	2.15	3.59	4.67	3.79	2.64	2.37	2.37	5.58	5.83	2.87	4.22	2.88	2.55	2.95	4.89	2.42	1.11	1.99	1.01	0.71	1.3	1.31	0.27	0.12
56193	Cr1l	0.13	0.48	0.7	3.69231			0.328274	0.05	0	0.11	0	0.1	0.22	0.18	0.31	0.27	0.12	0	0.1	0.2	0.07	0.19	0.2	2.17	0.28	1.41	0.24	0.11	0.1	0.35	0.11	0.23	0.2	0.4	0.52	0.28	0.33	0.46	0.58	6.74	0.68	0.48	0.23	0	0.29	0.2	0.5	0.09
11520	Csrp1	1.67	1.82	1.4	1.08982			0.544757	0.47	0.76	5.24	1.51	1.73	1.82	1.02	2.29	2.15	0.94	1.12	2.19	1.07	1.2	1.58	1.14	1.38	3.91	0.96	1.78	1.85	0.98	3.58	1.47	1.78	2.01	0.97	1.92	1.73	2.16	2.15	2.69	3.35	1.44	2.15	1.46	0.59	1.09	1.22	0	0.77
84094	Ctsc	0.53	1.04	2.08	1.96226			0.00763293	0.39	0	0.8	0.43	0.3	0.35	0.44	0.9	0.5	0.91	0.27	0.74	0.64	0.56	0.76	0.82	0.57	0.45	0.58	0.78	0.63	0.81	1.82	1.25	1.69	1.99	1.14	2.42	1.67	4.59	0.88	8.6	3.66	1.98	1.83	1.44	0.71	1.6	1.75	1.35	0.94
235611	Cux1	0.01	0.01	0	Inf			0.155714	0.01	0.01	0.05	0	0	0	0	0.02	0.02	0	0	0	0.01	0	0.01	0	0	0	0	0.01	0.06	0	0	0	0	0	0	0	0	0	0	0	0	0	0	0	0	0	0	0	0
27205	Dbi	38.35	262.31	508.58	6.8399			2.06e-08	19.97	19.81	34.75	9.81	13.02	29.76	8.11	62.31	40.39	32.17	39.02	42.2	87.36	82.5	54.08	44.03	97.97	211.69	193.72	301.99	196.54	176.74	366.98	288.6	402.2	460.38	406.82	426.94	214.23	368.67	559.5	397.51	300.81	326.32	318.68	179.62	432.61	577.45	778.98	870.29	421.43
76448	Dicer1	0.02	0.02	0.04	2			0.60052	0.05	0.03	0.02	0.03	0.04	0.02	0.02	0.02	0.03	0.03	0.01	0.01	0.02	0.03	0.01	0.01	0	0.01	0.02	0.01	0.02	0	0.02	0.02	0.01	0.01	0.07	0.03	0.02	0.03	0.03	0.01	0.31	0.04	0.12	0.03	0	0	0	0	0
19056	Dock2	0.02	0.06	0.03	2			0.0547151	0	0	0	0	0	0	0.04	0.02	0.03	0.04	0.03	0.03	0.06	0.04	0.05	0.03	0.07	0.04	0.05	0.04	0.02	0.05	0.11	0.03	0.1	0.07	0.1	0.05	0.11	0.14	0.05	0.1	0.09	0	0	0	0	0	0	0	0
116847	Dock8	0.02	0.03	0.01	2			0.00739462	0	0.01	0.07	0.01	0.03	0.01	0.04	0.02	0.01	0.01	0.01	0.03	0.03	0.01	0.04	0.01	0.03	0.02	0.04	0.02	0.02	0.03	0.01	0.05	0.04	0.05	0.04	0.03	0.01	0.04	0.05	0.02	0.01	0	0	0	0	0	0	0	0
108079	Dpysl3	0.12	0.17	0.2	1.17647			0.235567	0.2	0.11	0.38	0.11	0.12	0.17	0.05	0.07	0.14	0.13	0.04	0.12	0.1	0.04	0.08	0.11	0.08	0.1	0.16	0.17	0.06	0.14	0.13	0.16	0.3	0.23	0.36	0.38	0.24	0.38	0.21	0.43	0.39	0.28	0.15	0.34	0.1	0.08	0.11	0.07	0.05
19091	Dtx3l	0.02	0.19	0.37	9.5			6.7e-09	0	0	0	0.01	0.03	0.01	0.02	0.08	0.03	0.02	0.01	0.05	0.01	0.02	0.02	0.02	0.01	0.12	0.16	0.26	0.1	0.13	0.15	0.17	0.53	0.26	0.39	0.69	0.11	0.49	0.39	0.43	0.44	0.37	0.21	0.33	0.5	0.54	0.3	0.35	0.45
19125	Eef1a2	68.85	94.49	23.05	2.98698			0.0724131	0	0	0	168.13	134.61	0	0	0	0	117.57	107.87	164.92	118.38	84.05	137.17	98.34	124.28	198.52	94.71	119.03	0	0	0	0	244.36	254.61	0	0	0	0	183.63	231.24	0	0	0	0	0	0	0	0	0
19152	Eif1ax	2.18	1.82	1.04	1.75			0.00224857	4.28	4.04	2.65	1.77	3.53	1.82	1.93	1.75	1.99	1.21	1.04	1.58	2.56	1.06	1.44	1.6	2.33	2.28	2.44	1.04	1.16	0.95	1.52	1.85	1.79	3.54	1.29	1.24	0.97	0	0.14	0.81	1.19	0.63	1.87	0	1.37	1.23	2	2.18	0.31
101739	Eng	0.1	0.2	0.15	1.33333			0.35323	0.14	0.11	0.04	0	0.39	0.02	0.02	0.02	0.04	0.2	0.29	0	0.22	0.03	0.04	0.08	0.5	0.2	0.5	0.27	0	0.36	0	0.07	0.07	0.32	0.09	0.28	0.03	0.03	0	0.35	0.1	0.18	0.49	0.06	0	0.08	0.23	0	0.68
19171	Eno3	19.79	28.99	51.11	1.76302			2.11e-05	29.02	17.74	60.52	5.74	21.97	17.53	11.19	20.92	24.41	10.54	10.8	28.77	15.51	7.45	14.67	12.17	10.68	40.37	29.66	24.97	3.03	13.78	36.32	26.73	60.44	32.35	57.39	61.94	35.37	24.83	53.78	25.27	52.04	55.96	36.08	39.27	59.47	54.01	51.77	80.47	27.81
16913	Esam	0	0.06	0.05	Inf			0.42108	0	0	0	0	0.02	0.02	0	0	0	0	0	0	0	0	0	0	0.03	0.38	0	0	0	0	0	0	0	0.16	0.14	0.66	0.02	0	0	0.19	0.05	0	0	0	0	0	0	0	0
16912	Esyt1	0.34	0.55	0.77	1.61765			0.150816	0.25	0.32	0.36	0.12	1.15	0.07	0.45	0.36	0.19	0.1	0.26	0.15	0.27	0.75	0.23	0.47	0.08	1.62	0.49	0.44	0.49	0.6	0.5	0.5	0.64	0.28	0.46	0.71	0.37	0.85	2.35	0.4	0.45	0.35	2.49	0.12	0.28	0.54	0.16	2.59	0.24
19186	Fadd	0.19	0.1	0.02	5			0.138493	0	0	0	1.03	0	0.94	0	0	0	0.04	0	0.75	0.05	0.09	0	0.02	0.09	0.38	0	0.06	0.12	0	0	0	0.27	0.24	0	0	0	0	0	0.21	0.08	0	0	0	0	0	0	0	0
19188	Fermt3	1.78	1.91	0.63	2.8254			3.77e-07	1.51	1.4	3.02	2.08	1.82	1.54	1.5	2.09	1.79	1.31	1.17	2.42	1.44	1.87	1.79	2.02	1.92	1.55	1.9	1.91	2.11	1.5	2.24	1.8	2.61	1.61	1.77	2.11	1.52	1.1	1.92	1.53	1.05	0.28	0.83	0.18	0.1	0.1	0.05	0.07	0
19200	Fhl1	0.15	0.69	0.85	4.6			0.00157234	0.2	0.1	0.12	0.06	0.12	0.08	0.07	0.22	0.16	0.15	0.13	0.29	0.17	0.22	0.2	0.32	0.26	0.59	0.4	0.46	0.33	0.62	1.31	0.8	1.34	0.97	0.88	0.88	0.89	1.34	2.55	0.46	1.21	0.45	1.09	1.19	0.66	0.35	0.53	0.36	2.43
15170	Fkbp15	0.26	0.22	0.2	1.18182			0.447455	0.31	0.26	0.46	0.21	0.23	0.22	0.22	0.28	0.1	0.43	0.27	0.3	0.23	0.22	0.09	0.17	0.25	0.2	0.15	0.35	0.27	0.3	0.14	0.21	0.09	0.42	0.15	0.41	0.36	0.39	0.08	0.25	0.31	0.37	0.21	0.09	0.37	0.06	0.05	0.16	0.06
19264	Flna	1.78	2.53	1.58	1.42135			0.0327403	1.46	1.8	3.63	1.53	1.88	2.17	1.38	1.96	1.87	1.01	1.17	2.1	1.19	1.09	2.41	1.38	1.61	3.1	2.1	2.51	2.52	2.06	2.72	2.92	3.44	3.24	2.71	2.5	3.22	3.28	2.12	3.13	3.16	1.74	2.37	1.65	0.76	0.93	0.63	0.47	0.37
236312	Fyb	0.08	0.12	0.13	1.08333			0.699062	0.16	0.05	0.07	0.16	0.07	0.08	0.12	0.12	0.03	0.04	0.04	0.08	0.06	0.07	0.06	0.04	0.15	0.1	0.05	0.11	0.07	0.03	0.07	0.11	0.1	0.59	0.08	0.13	0.06	0.24	0.08	0.77	0.75	0	0.01	0.12	0	0.1	0.06	0	0
106572	Glipr2	0.63	1.15	0	Inf			4.96e-12	0.28	0.34	0.6	0.28	0.42	0.56	0.41	1.55	0.95	0.43	0.45	0.91	0.49	0.56	1.15	1.17	1.51	0.52	1.03	1.25	0.79	0.82	1.34	1.67	1.49	1.36	0.83	0	0	0	0	0	0	0	0	0	0	0	0	0	0
19340	Gm2a	0.73	3.27	3.03	4.15068			0.000551054	0.39	0.25	0.55	0	0.83	0.55	0.36	1.28	1.46	0.67	0.66	1.22	0.46	0.78	1.49	1.07	1.35	1.51	1.92	2.43	1.48	1.89	4.35	4.56	3.17	4.24	11.31	3.53	2.24	4.46	3.94	5.06	5.64	1.66	1.82	2.71	1.77	3.3	3.76	2.05	2.32
29809	Gnai2	2.06	3.07	2.13	1.44131			0.0589919	2	1.71	3.81	1.55	1.32	2.76	1.44	1.62	1.52	3.31	1.76	1.96	2.44	1.76	1.97	1.8	1.84	2.81	5.59	2.6	2.17	3.15	3.45	1.76	5.98	3.71	1.96	2.61	2.71	2.95	3.03	4.22	3.69	2.64	2.4	1.84	1.79	1.69	2.81	1.04	0.97
19354	Gsdmd	0.11	0.32	0.62	2.90909			5.43e-07	0	0	0	0.02	0.01	0	0.03	0.07	0.36	0.25	0.26	0.05	0.27	0.24	0.14	0.04	0.14	0.83	0.79	0.1	0.28	0.44	0.31	0.31	0.12	0.22	0.21	1.14	0.2	0.97	0.63	0.93	0.5	0.36	0.45	0.88	0.49	0.57	0.58	0.59	0.53
215449	Hcls1	0.46	0.72	0.6	1.2			0.545871	0.13	0.3	0.56	1.9	0.27	0.26	0.38	0.72	0.55	0.46	0.12	0.43	0.38	0.13	0.33	0.24	0.37	0.67	1.44	0.61	0.8	0.64	0.44	0.97	0.67	0.98	0.75	1.02	0.53	2.57	0.74	1.84	1.88	0.68	0.46	0.22	0	0.2	0.45	0.03	0.03
71660	Ifih1	0.01	0.09	0.18	9			6.23e-05	0	0	0	0	0	0	0.08	0.05	0.02	0	0	0	0	0	0	0	0.02	0.05	0.05	0.13	0.07	0.1	0.06	0.05	0.08	0.24	0.22	0.15	0.18	0.17	0.04	0.27	0.25	0.07	0.27	0.1	0.06	0.22	0.15	0	0.15
19414	Ifit1	0	0.09	0.16	Inf			0.0851119	0	0	0	0	0	0	0	0	0	0	0	0	0	0	0	0	0	0	0.16	0.17	0	0	0.23	0.06	0.06	0.34	0.08	0.11	0.29	0.13	0.16	0.56	0	0	0	0	0.22	0.1	0	0.01	0.12
69903	Il16	0.01	0.06	0.03	3			0.0214624	0	0	0	0	0	0	0	0.06	0.02	0.02	0.01	0.02	0.01	0.01	0.04	0.01	0.02	0.04	0.13	0.11	0.04	0.04	0.06	0.07	0.01	0.05	0.08	0.07	0.11	0.14	0.04	0.05	0.07	0.03	0.04	0.05	0	0	0	0	0
215653	Iqgap1	0.95	1.61	1.61	1.69474			0.137643	0.48	0.8	1.75	0.64	1.2	0.95	0.58	1.45	1.33	0.39	0.53	1.11	0.93	0.51	1.6	0.96	1.15	2.15	1.12	1.23	1.43	1.53	1.21	1.32	2.66	2.8	1.75	1.95	2.28	2.7	1.72	4.59	4.73	1.18	2.07	1.88	0.45	0.63	0.53	0.73	0.95
71336	Isg20	0.14	0.24	0.01	14			0.0037204	0	0	0	0	0	0	0.13	0.34	0.19	0.08	0.17	0.24	0.23	0.07	0.63	0.37	0.43	0.36	0.47	0.61	0.5	0.08	0.07	0	0	0	0	0.19	0	0.04	0	0	0	0	0	0	0	0	0	0	0
56878	Itga2b	0.75	1.5	1.14	1.52			0.430657	0.33	0.66	1.12	0.75	0.72	0.78	0.8	1.22	1.22	0.62	0.29	0.98	0.85	0.2	0.76	0.94	0.99	2.26	0.68	1.94	0.17	1.58	2.79	2.63	3.06	0.43	0.51	0.05	3.13	0.14	0.16	5.44	4.08	5.78	0.02	0	0	0	0	0	0
19659	Itgal	0.02	0.11	0.13	5.5			0.222918	0.01	0.01	0	0	0	0	0.03	0.04	0.06	0.01	0.03	0.06	0.02	0.02	0.08	0.01	0.02	0.02	0.06	0.18	0.03	0.03	0.08	0.01	0.18	0.34	0.41	0.1	0.08	0.4	0.56	0.76	0.49	0	0	0	0	0	0	0	0
19664	Itgb2	0.09	0.27	0.19	2.11111			0.175685	0.03	0.08	0.09	0.02	0.07	0.04	0.03	0.22	0.1	0.11	0.1	0.19	0.04	0.06	0.24	0.08	0.23	0.35	0.44	0.49	0.36	0.07	0.19	0.26	0.22	0.23	0.28	0.26	0.37	0.72	0.42	1.16	0.42	0.02	0.09	0.05	0	0	0	0	0
226594	Itsn2	0.06	0.07	0.06	1.16667			0.958091	0	0.02	0.19	0.01	0.32	0.04	0.06	0.03	0.03	0.02	0.02	0.07	0.02	0.01	0.05	0.09	0	0.02	0.02	0.03	0.25	0.02	0.05	0.35	0	0	0	0	0.08	0.3	0	0.12	0.11	0.17	0.09	0.12	0	0	0	0	0
19697	Kif21a	0.01	0.1	0.12	10			0.00021895	0.02	0.02	0	0.01	0.01	0	0.01	0.02	0.02	0.03	0.01	0.02	0	0.01	0.01	0.01	0.02	0.05	0.03	0.03	0.03	0.03	0.19	0.08	0.22	0.16	0.3	0.13	0.07	0.12	0.11	0.12	0.2	0.04	0.06	0.11	0.1	0.18	0.15	0.13	0.02
56212	Lcp1	2.92	7.17	7.72	2.45548			0.000111586	1.85	1.41	2.34	1.71	2.13	1.81	2.17	4.53	3.83	2.8	2.57	4.17	3.29	2.31	6.92	4.08	4.63	6.91	7.28	9.1	6.4	5.08	7.17	6.39	10.45	9.9	8.62	11.63	8.08	14.23	10.32	18.79	9.34	5.77	5.61	4.68	5.57	5.11	5.06	7.94	4.68
19878	Lgmn	0.58	2.45	3.76	4.22414			6.22e-05	0.23	0.31	0.4	0.29	0.38	0.32	0.39	0.9	0.69	0.75	0.53	1.12	0.78	0.41	1.26	0.94	0.97	1.47	1.46	1.66	1.37	1.67	3.18	2.64	6.64	4.72	2.71	4.12	3.33	3.76	6.63	9.11	8.23	4.21	3.54	4.14	3.03	3.29	3.15	3.36	0.35
267019	Lpgat1	0.02	0.3	0.6	15			8.32e-06	0	0	0	0	0	0	0.04	0.07	0.05	0.02	0	0.07	0	0	0	0.12	0.16	0.22	0.06	0.17	0.13	0.24	0.26	0.23	0.62	0.63	0.71	1.23	0.91	1.02	0.68	1.01	0.92	0.74	0.43	1.3	0.1	0.41	0.49	0.33	0.18
209086	Lrrfip1	0.14	0.29	0.4	2.07143			0.0147454	0.05	0.09	0.21	0.1	0.2	0.07	0.06	0.37	0.25	0.08	0.09	0.15	0.09	0.09	0.23	0.14	0.08	0.29	0.41	0.14	0.14	0.14	0.26	0.33	0.74	0.17	0.6	0.19	0.51	0.38	0.31	0.38	1.22	0.11	0.37	0.52	0.26	0.96	0.26	0.19	0.17
56045	Man2b1	0.24	1.07	1.31	4.45833			3.82e-06	0.06	0.08	0.21	0.09	0.16	0.21	0.22	0.39	0.32	0.26	0.29	0.4	0.18	0.25	0.5	0.21	0.37	1.02	0.51	0.99	0.66	1.02	2.18	1.08	1.19	2.24	1.35	2.33	1.45	1.31	2.17	2.45	1.94	1.28	1.6	1.25	1.19	0.91	0.74	1.1	0.84
67742	Metap2	2.8	1.77	2.54	1.10236			0.186462	3.11	2.92	5.76	2.97	3.79	3.31	2.55	2.2	2.66	3.87	1.67	1.75	2.12	2.26	1.11	1.71	1.25	1.47	1.25	1.89	1.21	0.98	1.43	1.81	1.27	4.83	2.14	1.89	0.57	4.85	1.23	5.52	3.07	1.04	4.65	4.96	3.66	3.14	2.66	3.47	1.12
74131	Mmrn1	0.02	0.02	0	Inf			0.00411481	0.02	0.02	0.07	0.02	0.06	0.03	0.02	0.02	0.05	0.02	0	0.03	0	0	0	0	0.02	0.05	0.01	0.04	0.01	0	0	0	0	0.01	0.09	0	0	0	0	0	0	0	0	0	0	0	0	0	0
66234	Myd88	0.07	0.06	0.13	1.85714			0.0930771	0.03	0.21	0.19	0.09	0.18	0.03	0	0.04	0.02	0.02	0.1	0.04	0.03	0.03	0.02	0.01	0.03	0.03	0	0	0	0.16	0.1	0.09	0	0.19	0.13	0.25	0	0.11	0	0.29	0.15	0.34	0	0.24	0.17	0.06	0.12	0.17	0.08
20324	Myh9	6.06	11.33	14.3	1.86964			1.99e-05	4.77	4.66	8.18	5.89	5.21	5.13	5.28	8.78	8.06	6.62	4.51	6.1	4.92	4.68	8.04	6.66	6.4	9.75	10.36	12.35	9.21	8.99	11.48	12.1	18.13	18.29	12.19	14.7	17.98	23.4	15.18	22.02	19.75	18.78	21.81	16.62	12.96	14.52	10.38	10.3	9.67
20341	Myo1g	0.06	0.1	0.03	2			0.388854	0	0	0	0	0.01	0.04	0.04	0.06	0.03	0.01	0.01	0.4	0.01	0	0.34	0.01	0.05	0.02	0.04	0.73	0.05	0.01	0.04	0.03	0	0.13	0.06	0.06	0.15	0.04	0.03	0.15	0.05	0	0	0	0	0	0	0	0
20717	Naa50	1.94	1.17	0.99	1.65812			0.00087949	2.24	3.4	3.93	1.74	2.58	2.12	1.81	1.38	1.53	1.43	0.98	1.1	2.17	1.15	1.54	1.06	0.64	1.91	3	1.16	1.21	0.5	1.19	0.67	0.7	0.72	1.31	1.44	1.39	1.4	1.06	1.16	0.66	1.14	1.18	0.63	0.64	1.33	1.24	0.87	0.63
20716	Ncf1	0.53	0.33	0.16	2.0625			0.668944	0	0	0	0	0	0	0.07	0.3	0.06	0.03	0.02	0.19	0.04	0.01	7.18	0.03	0.18	0.46	0.2	0.46	0.78	0.02	0.09	0.42	0	0.13	1.24	0.12	0.38	0.57	0.19	0.06	1.57	0	0	0	0	0	0	0	0
20723	Nckap1l	0.01	0.01	0.01	1			0.979258	0	0	0	0	0	0	0.06	0.03	0.01	0	0.03	0.02	0.01	0.01	0.01	0	0.01	0.03	0	0.03	0.02	0	0.01	0.01	0	0.02	0.03	0	0.05	0.02	0.05	0.01	0.05	0	0	0	0	0.01	0.03	0	0
20404	Nfkb1	0.03	0.22	0.13	4.33333			0.137319	0.04	0.01	0.02	0.12	0.04	0.01	0.01	0.02	0.02	0.01	0.02	0.02	0.02	0.01	0.05	0.01	0.21	0.73	0.08	0.06	0.4	0.05	0.04	0.45	0.04	0.52	0.06	0.05	0.02	0.08	0.07	0.1	0.12	0.02	0.37	1.25	0.03	0.02	0.02	0	0
58194	Nt5c2	0.66	0.75	0.33	2			0.0161313	0.82	0.75	0.78	0.87	0.6	0.91	0.63	0.4	0.43	0.26	0.56	0.67	0.88	0.43	0.86	0.49	0.65	1.34	0.49	0.64	0.79	0.58	2.18	0.39	0.62	0.37	0.47	0.3	0.28	0.38	0.5	0.34	0.4	0.24	0.3	0.21	1.7	0.39	0.39	0.14	0.08
58234	Ostf1	1.2	1.74	1.76	1.01149			0.06786	1.12	0.7	1.41	0.71	1.4	1.55	0.89	1.63	1.78	1.14	0.71	1.66	0.98	0.47	1.9	0.68	1.43	2.02	1.39	1.65	1.67	1.32	1.46	2.17	2.35	2.12	2.57	1.51	1.72	2.09	2.98	3.18	1.86	2.15	1.15	1.75	1.1	2.31	1.3	0.27	0.94
20469	Otud7b	0.01	0.01	0	Inf			0.264359	0.01	0.02	0.01	0.01	0.03	0.02	0	0.02	0.04	0	0	0	0	0	0	0	0	0	0	0	0	0	0.06	0.01	0	0	0	0	0	0	0	0	0	0	0	0	0	0	0	0	0
64384	Pak2	0.88	0.98	0.69	1.11364			0.201618	0.71	0.73	2.21	0.52	1.11	1.19	0.71	1.3	0.97	0.43	0.4	0.69	0.99	0.56	0.61	0.88	0.57	1.02	1.05	1.1	0.63	0.82	0.81	1.06	1.21	0.85	1.7	0.62	0.67	1.29	1.45	0.77	1.15	1	0.71	0.58	0.29	0.73	0.72	0.08	0.16
209011	Pank1	0	0.01	0.02	Inf			0.123202	0	0	0	0	0	0	0	0	0	0	0	0	0	0	0	0	0	0	0	0	0	0	0.03	0.05	0	0	0	0	0	0	0.09	0	0.1	0	0	0	0	0	0	0	0
229731	Pcbd1	6.35	33.93	56.07	5.34331			1.06e-10	1.95	1.79	2.62	3.31	3.8	2.16	4.99	11.51	6.47	5.91	5.49	12.62	5.65	4.43	22.48	11.38	13.1	55.8	46.71	19.91	23.54	28.04	22.05	30.55	39.23	51.13	65.77	28.08	22.25	45.41	46.71	54.53	43.91	63.12	55.48	92.2	57.54	62.45	80.85	65.05	63.49
26569	Pck2	1.05	1.51	0.57	1.84211			9.06e-05	0.81	0.83	1.16	0.96	0.73	0.99	1.08	1.62	1.69	0.98	0.89	1.04	1.07	0.81	1.09	1.25	3.04	1.26	1	1.66	1.58	1.06	2.05	0.86	1.25	2.04	1.08	1.14	1.14	1.53	1.54	0.78	1.15	0.52	0.46	0.56	0.23	0.32	0.37	0	0.07
20529	Pcyox1	0.8	3.13	3.85	3.9125			1.15e-06	0.49	0.31	0.33	0.16	0.26	1.33	0.92	1.31	0.59	0.73	1.28	1.03	1.21	0.84	1.19	0.86	2.27	4.33	4.13	4.23	1.84	1.98	4.28	3.54	3.7	3.39	2.96	5.57	5.2	4.14	6.69	5.83	5.83	4.23	6.78	3.31	1.44	3.71	2.39	0.8	3.66
14385	Pds5b	0.3	0.21	0.14	1.42857			0.123679	0.15	0.51	0.9	0.37	0.41	0.05	0.17	0.15	0.13	0.1	0.51	0.27	0.2	0.54	0.09	0.07	0.1	0.15	0.47	0.09	0.07	0.07	0.15	0.88	0.14	0.11	0.27	0.1	0.5	0.11	0.08	0.21	0.21	0.07	0.6	0.2	0.06	0.11	0.04	0.01	0.04
68682	Pecam1	0	0.03	0.04	Inf			0.153702	0	0	0	0	0	0	0	0	0	0	0	0	0	0	0	0	0	0	0	0	0	0.06	0	0.06	0	0.16	0.13	0.02	0.03	0	0.02	0.27	0.14	0.02	0.07	0.13	0	0	0	0	0
65962	Pip4k2a	0.15	0.14	0.06	2.33333			0.265813	0.06	0.12	0.65	0.08	0.38	0.2	0.12	0.12	0.15	0	0.05	0.27	0	0	0	0	0	0	0	0.15	0.09	0.12	0.14	0.06	0	0.69	0.4	0	0.1	0.14	0	0.39	0.11	0	0	0	0	0	0	0	0
24059	Plcg2	0.11	0.14	0.02	5.5			0.00759148	0.11	0.07	0.13	0.03	0.11	0.09	0.05	0.11	0.23	0.11	0.07	0.12	0.11	0.05	0.23	0.11	0.05	0.05	0.1	0.12	0.09	0.11	0.64	0.11	0.06	0.06	0.15	0.04	0.07	0.12	0	0.06	0.11	0	0	0	0	0	0	0	0
20657	Plek	0.96	0.89	0.17	5.23529			0.000105183	1.96	0.62	2.47	1.19	1.57	1.24	0.71	0.43	0.56	0.37	0.67	0.61	0.45	0.76	0.8	0.31	0	0.99	0.74	0.42	0.85	0.6	1.44	1.26	1.19	1.95	0.93	0.4	0	0.81	0	0.85	0.47	0.19	0	0.24	0	0	0	0	0
20679	Plvap	0.43	0.24	0.38	1.58333			0.380238	0.82	1	0.94	0.17	0.93	0.92	0	0.65	0.68	0	0.13	0.23	0	0	0	0	0.14	0.21	0.56	0.25	0	0.26	0.04	0.26	0.06	0.32	0.79	0.37	0.2	0.34	1.32	0.06	0.56	0.3	0.51	0.3	0.75	0.39	0.54	0.53	0.27
20684	Plxnb1	0.1	0.2	0.16	1.6			0.696623	0	0	0	0	0	0	0.25	0.01	0.46	0	0.28	0.5	0	0	0	0.24	0.23	0.69	0	0	0	0	0	0	0.25	1.03	0.01	0	0	0	0.12	1.11	0.03	0.29	1.15	0.02	0.14	0	0.01	0	0
50850	Ppp3cb	0.22	0.2	0.13	1.53846			0.289414	0.16	0.21	0.73	0.32	0.12	0.18	0.16	0.26	0.19	0.15	0.14	0.21	0.15	0.23	0.15	0.16	0.27	0.12	0	0.46	0.11	0.17	0.16	0.11	0	0.36	0.42	0.23	0.2	0.2	0	0.68	0.22	0.09	0	0.21	0	0	0	0	0
72572	Psme1	7.67	21.96	31	2.8631			1.6e-07	5.15	3.24	9.61	5.15	6.29	6.47	6.03	14.14	9.74	8.01	6.96	9.31	7.93	5.51	11.56	9.55	12.6	23.58	20.81	22.91	15.55	20.88	26.11	17.99	40.65	25.57	27.28	33.9	29.02	62.19	33.04	60.52	31.09	29.42	30.44	29.34	20.53	27.58	34.36	33.5	22.86
268656	Psme2	2.42	7.53	11.59	3.11157			2.23e-07	2.12	1.73	2.08	2.34	3.22	1.2	2.31	3.82	2.85	3.35	2.44	3.1	0.97	2.08	2.7	2.57	2.74	5.47	14.09	11.49	6.36	8.45	6.79	4.23	12.42	10.95	4.78	23.01	15.21	15.3	8.54	16.22	10.96	15.29	14.76	9.96	12.37	13.19	11.65	5.61	10.74
20848	Ptpn6	2.09	3.21	3.14	1.50239			0.394965	1.59	0.37	4.87	0.31	3.18	2.69	0.94	4.37	2.68	2.1	1.35	1.61	1.72	1.72	1.84	1.62	1.61	4.18	1.17	4.75	4.29	2.2	3.41	2.28	5.57	4.68	2.78	4.3	1.69	6.59	2.78	7.84	12.67	4.63	0.92	5.24	1.15	1.59	1.26	0.37	2.7
20850	Ptprc	0.04	0.1	0.07	1.75			0.257968	0.01	0.01	0.02	0.01	0.01	0.01	0.05	0.1	0.01	0.08	0.01	0.16	0.02	0.01	0.04	0.1	0.02	0.13	0.06	0.21	0.02	0.06	0.04	0.16	0.08	0.13	0.21	0.05	0.16	0.46	0.1	0.32	0.2	0.02	0.01	0	0	0	0	0	0
117167	Rab3d	0.04	0.08	0.04	2			0.173463	0	0	0	0.04	0.06	0	0.06	0.12	0.07	0	0.1	0.05	0	0.05	0.08	0.07	0.07	0.13	0.17	0.1	0.08	0	0.04	0.09	0.14	0	0.11	0.13	0.05	0	0	0.19	0.29	0	0	0	0	0	0	0	0
20868	Rac2	4.03	7.47	6.41	1.59057			0.0201837	1.95	4.27	3.17	3.33	2.51	3.42	5.17	4.59	3.41	3.42	4.93	4.39	4.88	4.54	6.41	4.54	6.39	9.66	7.48	10.84	10.76	7.24	5.09	4.96	5.87	10.6	6.24	9.65	8.72	14.05	9.63	14.4	9.17	5.4	8.86	5.91	3.57	5.24	5.68	4.67	2.06
53416	Rap1b	3.85	6	5.72	1.04895			0.00166847	1.94	4.66	6.33	3.65	3.27	4.58	3.26	3.27	3.8	3.87	3.35	4.47	3.25	2.88	5.23	3.53	4.1	5.94	4.93	7.01	5.75	4.19	6.1	7.06	9.93	7.68	5.77	6.94	6	7.43	5.69	9.91	7.43	5.09	7.56	5.76	3.78	4.86	4.7	4.96	5.05
225115	Rasa3	0.05	0.04	0.03	1.25			0.820528	0.05	0.04	0.08	0.06	0.09	0.05	0.09	0.03	0.03	0.03	0.07	0.02	0.02	0.04	0.02	0.04	0.02	0.02	0.03	0.03	0.02	0.03	0.06	0.03	0.07	0.04	0.06	0.07	0.02	0.43	0	0.04	0.03	0	0	0	0	0	0	0	0
20947	Rasip1	0.02	0.04	0.07	2			0.00686961	0.01	0	0.04	0.01	0.01	0.01	0	0.05	0.06	0	0.01	0.07	0	0	0	0	0	0	0.06	0.07	0	0.06	0.03	0.05	0.09	0.08	0.09	0.14	0.12	0.11	0.09	0.18	0.09	0.05	0.14	0.09	0.05	0.04	0.05	0	0.03
20963	Rbms1	0.1	0.16	0.07	1.6			0.478145	0.14	0.05	0.25	0	0	0	0.11	0.21	0.21	0.09	0	0.22	0.1	0	0.13	0	0.13	0.05	0.06	0.2	0	0	0.27	0.2	0	0.73	0.25	0	0	0	0	0.71	0.58	0	0	0	0	0	0	0	0
21346	Rbp1	11.54	34.01	31.12	2.69671			0.000419533	8.41	5.8	14.65	6.54	6.29	6.47	6.85	20.5	16.9	10.22	11.85	14.75	12.99	8.23	22.72	13.29	20.58	42	35.27	32.31	17.42	29.91	44.81	36.54	50.88	48.77	36.37	51.47	47.28	44.91	52.91	37.2	50.04	46.94	54.35	47.65	28.71	27.47	25.77	10.34	9.81
21351	Rela	0.19	0.28	0.39	1.39286			0.155189	0.12	0.13	0.32	0.11	0.16	0.1	0.17	0.27	0.24	0.22	0.23	0.42	0.03	0.17	0.17	0.31	0.02	0.39	0.2	0.46	0.21	0.32	0.29	0.2	0.49	0.32	0.17	0.34	0.86	0.45	0.17	1.29	0.63	1	0.95	0.48	0.3	0.13	0.11	0	0
21355	Rhog	1.79	3.07	2.27	1.35242			0.0312369	1.18	1.01	1.5	2.3	1.16	1.16	1.67	2.1	2.2	1.38	1.85	2.56	1.5	1.56	3.72	2.17	2.15	3.14	2.85	3.02	1.92	2.13	2.31	4.06	5	3.68	4.36	3.61	3.49	2.99	3.94	4.34	4.56	3.4	2.56	2.57	0.97	1.76	1.56	1.57	0.67
21356	Rock2	0.12	0.18	0.2	1.11111			0.513645	0.1	0.13	0.17	0.22	0.08	0.21	0.18	0.07	0.06	0.06	0.25	0.09	0.08	0.07	0.05	0.11	0.09	0.11	0.71	0.1	0.04	0.09	0.2	0.11	0.19	0.27	0.18	0.11	0.63	0.16	0.06	0.28	0.33	0.98	0.5	0.01	0.06	0.1	0.07	0.02	0
213233	Rps15a	18.36	23.39	30.75	1.31466			0.00125783	11.56	22.23	37.58	25.61	23.48	15.3	22.46	21.18	15.95	15.31	12.11	13.81	13.78	10.78	14.19	15.3	11.01	28.96	17.65	16.44	16.25	14.82	29.92	19.08	42.66	39.7	28.94	35.03	39.38	35.26	39.92	37.44	25.98	33.06	34.12	33.71	41.98	29.84	31.61	30.61	28.4
76795	Samhd1	0.58	1.22	2.23	2.10345			0.000176451	0.48	0.84	0.98	0.31	0.65	0.58	0.41	0.55	0.53	0.41	0.54	0.61	0.68	0.52	0.59	0.39	0.56	0.8	1.57	1.07	0.46	1.14	1.96	0.68	1.22	2.35	2.4	1.22	1.79	4.06	3.14	5.89	3	1.37	2.54	2.48	1.65	1.31	0.96	2.01	4.17
50765	Serpina3n	0	0.2	0.39	Inf			5.1e-05	0	0	0	0	0	0	0	0	0	0	0	0	0	0	0	0	0	0	0.04	0.74	0.02	0.12	0.11	0.19	0.53	0.38	0.27	0.3	0.19	0.55	0.43	1.13	0.81	0.28	0.36	0.23	0.21	0.53	0.22	0.28	0.15
21803	Sipa1	0.18	0.15	0.01	15			0.112666	0.85	0.02	0.04	0.04	0.06	0.05	0.07	0.07	0.06	0.65	0.06	0.06	0.02	0.54	0.05	0.38	1.04	0.01	0.01	0.05	0.03	0.02	0.01	0.04	0.05	0.03	0.1	0	0.02	0.13	0	0	0	0.01	0.01	0	0	0	0	0	0
21804	Slc25a24	0.06	0.09	0.04	1.5			0.24841	0.17	0.07	0.09	0.03	0.05	0.1	0.03	0.05	0.04	0.04	0.05	0.04	0	0.02	0.1	0	0.05	0.13	0.12	0.16	0.34	0.06	0	0.14	0	0.04	0.09	0.34	0.06	0.27	0	0	0	0	0	0	0	0	0	0	0
21817	Slc27a4	0	0.03	0.05	Inf			3.09e-05	0	0	0	0	0	0	0	0	0	0	0	0	0	0	0	0	0	0	0.07	0.07	0.02	0.02	0.03	0.01	0.03	0.03	0.03	0.07	0.01	0.02	0.04	0.1	0.12	0.03	0.02	0.07	0.03	0.05	0.04	0.06	0.02
230787	Slc37a4	0	1.54	2.4	Inf			3.13e-05	0	0	0	0	0	0	0	0	0	0	0	0	0	0	0	0.07	0	1.01	0.53	0.99	0.41	0	1.74	1.73	3.3	1.63	7.04	2.04	3.16	1.77	4.72	2.65	3.53	0.66	1.28	1.53	1.66	1.76	3.59	2.58	2.15
94346	Sp100	0	0.02	0.02	Inf			0.108218	0	0	0	0	0	0	0	0	0	0	0	0	0	0	0	0	0	0	0.02	0.09	0	0	0	0	0.05	0.04	0.02	0	0.02	0.05	0.02	0.12	0.07	0	0	0	0	0.04	0.03	0	0
21961	Spats2	0.13	0.07	0.06	1.85714			0.439706	0.95	0.13	0.24	0.09	0.04	0.02	0.06	0.05	0.05	0.06	0.09	0.03	0.07	0.06	0.05	0.04	0.07	0.07	0.08	0.03	0.31	0	0.03	0.02	0.04	0.09	0.05	0	0.06	0.15	0	0	0	0.33	0.49	0	0	0	0	0	0
21991	Stat3	0.34	0.91	1.13	2.67647			2.47e-05	0.13	0.26	0.4	0.18	0.25	0.29	0.27	0.51	0.53	0.25	0.33	0.5	0.31	0.33	0.6	0.34	0.42	0.87	1.03	0.78	0.53	0.51	0.87	0.75	1.55	1.57	1.71	1.52	1.33	2.35	1.08	1.69	1.55	1.26	1.23	1.26	0.63	1.35	1.2	0.48	0.51
59069	Stat5a	0.17	0.15	0.18	1.05882			0.875344	0.15	0.09	0.34	0.18	0.16	0.16	0.21	0.17	0.17	0.11	0.12	0.26	0.15	0.1	0.16	0.14	0.11	0.17	0.12	0.28	0.14	0	0.08	0.4	0.12	0.15	0.14	0.17	0.19	0.17	0	0.24	0.21	0.37	0.52	0.55	0	0.2	0.19	0.02	0.21
74735	Steap4	0	3.42	6.09	Inf			0.0235319	0	0	0	0	0	0	0	0	0	0	0	0	0	0	0	0.07	0.25	0.19	0.48	1.83	0.37	0.58	28.52	0.27	6.16	1.95	0.35	4.15	9.34	3.75	2.32	20.68	12.9	9.72	1.75	2.95	2.63	17.74	2.08	1.15	0.79
20821	Stk39	0.07	0.08	0.03	2.33333			0.378451	0	0	0	0.1	0.18	0.05	0.07	0.17	0.15	0.12	0.03	0.11	0	0	0	0.2	0.03	0.05	0	0	0	0	0.18	0.27	0	0.02	0.19	0	0	0	0	0	0	0	0.01	0.49	0	0	0	0	0
22051	Svil	0.08	0.12	0.19	1.58333			0.0357611	0.02	0.03	0.08	0.08	0.06	0.11	0.1	0.1	0.13	0.1	0.13	0.11	0.03	0.05	0.05	0.07	0.13	0.07	0.05	0.05	0.09	0.02	0.1	0.15	0.1	0.36	0.19	0.25	0.1	0.43	0.44	0.25	0.47	0.15	0.35	0.35	0.19	0.05	0.09	0	0.01
69499	Swap70	0.28	0.17	0.14	1.64706			0.275924	0.13	0.16	0.91	0.2	0.62	0.26	0.36	0.45	0.45	0.09	0.18	0.11	0.11	0.07	0.12	0.27	0.1	0.69	0.04	0.13	0.05	0.27	0.05	0.12	0.06	0.2	0.04	0.05	0	0.04	0.03	0.95	0.16	0.07	0.52	0	0.07	0.02	0.02	0	0
22117	Syk	0.17	0.29	0.2	1.45			0.630215	0.04	0.04	0.42	0.17	0.51	0.25	0.14	0.05	0.1	0.06	0.19	0.24	0.06	0.06	0.22	0	0.14	0.32	0.1	0.11	0.16	0.06	0.28	0.37	0.51	1.05	0.35	0.05	0.66	1.59	0.02	0.49	0.25	0.47	0.08	0.05	0	0	0	0	0
69863	Tagln2	15.19	22.2	13.31	1.46149			0.00705277	14.75	11.22	20.21	15.57	13.7	18.92	8.74	15.28	19.99	13.66	12.01	21.07	11.2	9.8	21.78	12.51	11.01	22.34	16.68	26.91	20.74	19.17	20.84	19.17	42.04	30.68	24.25	18.57	22.01	26.16	21.3	16.95	19.44	13.53	16.63	11.6	12.97	18.11	14.1	6.42	4.46
50500	Taldo1	18.82	21.95	32.11	1.46287			0.000177075	25.75	20.79	25.87	12.43	18.84	21.67	17.71	19.2	19.43	19.13	15.46	20.41	19.63	14.44	11.55	15.86	20.08	23.66	22.93	16.94	19.03	16.91	25.51	13.03	42.97	31.11	15.34	40.03	32.5	24.92	45.91	32.27	18.54	23.65	46.75	30.12	27.14	41.91	48.74	31.85	18.66
353170	Tapbpl	0	0.21	0.17	Inf			0.117224	0	0	0	0	0	0	0	0	0	0	0	0	0	0	0	0	0	0	0.42	0.55	0	0	0.32	0.09	0	0.36	0.83	0.58	0.23	0	0	0.34	1.3	0	0	0	0	0	0	0	0
74153	Tbc1d9b	0.02	0.08	0.09	4			0.076781	0.02	0	0.03	0.01	0.04	0.03	0.02	0.03	0.05	0.01	0.01	0	0.04	0	0.04	0.1	0.01	0	0.06	0.06	0.06	0.05	0.1	0.17	0.2	0	0.14	0	0	0	0	0.03	0.15	0.11	0.12	0.04	0.06	0.13	0.06	0.49	0
70450	Tfr2	0	0.9	1.73	Inf			0.000298209	0	0	0	0	0	0	0	0	0	0	0	0	0	0	0	0	0	0	0.06	0.85	0.35	0.13	1.82	0.38	2.94	3.01	1.23	1.45	1.89	1.85	4.18	3.48	1.69	4.13	1.45	0.24	2.48	0.89	0.8	3.69	0.49
53620	Tgm2	3.56	8.46	13.07	2.3764			2.8e-08	2.58	2.21	2.76	2.47	2.85	3.04	3.22	5.8	4.88	3.88	2.89	3.44	4.7	2.72	5.91	3.49	4.29	7.93	8.07	10.12	6.88	7.59	9.44	8.06	16.05	10.03	9.55	11.81	14.75	17.07	9.54	14.21	11.75	15.39	19.96	15.66	12.89	19.8	19.61	12.43	8.24
22324	Tns1	0.11	0.27	0.28	2.45455			0.0562516	0.02	0.02	0.02	0.04	0.01	0.02	0.34	0.18	0.07	0.16	0.21	0.13	0.15	0.16	0.1	0.16	0.35	0.15	0.19	0.2	0.04	0.11	1.23	0.14	0.21	0.18	0.25	0.13	0.13	0.15	0.45	0.2	0.35	0.2	0.33	0.19	0.4	0.55	0.11	0.28	0.05
22352	Tpi1	51.72	108.67	130.96	2.10112			1.68e-08	65.02	39.69	86.98	34.63	33.26	51.37	29.3	60.51	61.28	33	41.83	76.62	48.01	31.12	83.17	44.31	50.58	163.2	76.48	114.17	86.84	85.15	130.63	124.8	174.27	114.08	139.49	122.73	138.58	135.53	189.3	109.62	124.54	94.13	147.48	114.71	134.64	158.01	153.6	120.65	114.46
22361	Tpm3	13.39	17.41	16.75	1.0394			0.285192	15.46	9.68	21.15	11.24	11.91	13.92	12.74	11.13	24.25	14.14	9.65	8.92	10.45	11.61	14.59	14.32	11.66	14.62	10.98	12.5	11.26	14.33	17.76	35.89	18.62	28.46	18.55	18.91	13.17	29.99	12.28	29.03	33.74	21.05	20.79	14.89	14.47	13.89	18.06	7.99	9.8
22371	Trim21	0.01	0.04	0.08	4			0.00224779	0	0	0	0.01	0.01	0.03	0	0.03	0.02	0.01	0.01	0.03	0	0.01	0.03	0	0	0	0.05	0.1	0.1	0.07	0.04	0.07	0	0	0	0.07	0.19	0.12	0.09	0.17	0.11	0.11	0.11	0.1	0.07	0	0.07	0	0
22376	Trip6	0.03	0.02	0.03	1.5			0.86793	0.02	0.02	0.06	0.06	0.04	0.04	0.02	0.03	0.02	0	0.02	0.04	0.01	0	0.03	0	0	0	0	0	0	0	0	0	0.05	0.15	0.02	0	0	0	0.21	0	0.05	0.06	0.14	0.01	0	0	0	0	0
22380	Tsr2	0.14	0.11	0.15	1.07143			0.877934	0	0.12	0.68	0	0.18	0.22	0	0.12	0.12	0.12	0.06	0	0.08	0.1	0.23	0.44	0	0.37	0.13	0.21	0.12	0	0	0	0	0	0	0	0.31	0.33	0	0.57	0.29	0.22	0.92	0	0	0	0	0	0
215280	Tst	8.93	54.96	105.67	6.15454			2.44e-10	2.68	2.12	2.8	4.49	3.55	3.12	7.42	16.38	10.67	12.78	13.58	12.84	10.69	9.08	21.73	17.55	25.65	68.89	43.4	68.43	32.94	54.51	73.73	26.95	84.46	70.27	92.72	99.71	65.44	78.86	193.84	87	89.61	183.44	98.83	136.6	157.57	106.51	100.56	117.64	97.72
22436	Uba7	0.07	0.08	0.1	1.25			0.480802	0.12	0.01	0.06	0.06	0.04	0.09	0.08	0.22	0.1	0.04	0.03	0.05	0.12	0.03	0.05	0.03	0.04	0.06	0.22	0.3	0.07	0.04	0.02	0.02	0.03	0.05	0.05	0.09	0.05	0.11	0	0.31	0.07	0.05	0.01	0.13	0.12	0.14	0.16	0.06	0.22
383295	Vim	9.07	19.03	17.68	1.94928			0.00233114	11.73	10.25	17.44	6.92	9.24	9.16	5.84	9.18	8.35	7.56	7.94	9.49	6.86	5.24	10.86	10.99	6.71	15.86	19.48	18.26	15.11	18.72	20.35	21.45	32.45	26.79	22.21	29.79	28.37	26.98	23.67	34.43	26.07	20.84	23.27	17.74	11.84	14.21	10.44	19.33	5.8
22629	Vwf	0.04	0.15	0.08	2			0.27989	0.01	0.06	0.02	0.05	0.02	0.02	0.03	0.01	0	0.11	0.02	0.01	0.02	0.13	0.02	0.18	0.01	0.28	0.04	0.03	0.06	0.32	0.07	0.02	0.64	0.02	0.08	0.07	0.04	0.1	0.9	0.04	0.12	0.04	0.05	0.01	0.01	0.01	0.01	0	0
58203	Was	0.02	0.07	0.06	3			0.570919	0	0	0	0	0	0	0.14	0.06	0.02	0.04	0	0.03	0	0	0	0	0	0	0.1	0	0.05	0	0	0	0.45	0	0.28	0	0.42	0.58	0	0	0	0	0	0	0	0	0	0	0
78781	Ywhah	11.39	13.83	10.79	1.21422			0.174584	13.69	10.07	18.92	9.07	7.89	13.05	8.58	10.18	9.24	12.32	8.09	13.67	14.38	9.36	12.27	8.39	8.35	22.11	9.6	14.33	15.48	11.36	12.98	11.89	16.31	19.11	16	18.99	10.15	14.95	13.92	14.03	13.45	16.5	15.12	12.6	10.36	9.76	12.43	7.24	5.33
24136	Zc3hav1	0.51	0.19	0.36	1.89474			0.0105152	0.3	0.25	0.69	0.23	0.53	1.04	0.57	0.53	0.87	0.5	0.18	0.48	0.32	0.68	0.42	0.21	0.17	0.31	0.21	0.12	0.15	0.1	0.09	0.15	0.16	0.26	0.34	0.28	0.24	0.45	0.19	0.29	0.29	0.1	0.2	0.13	0.99	0.37	0.3	0.21	0.27
[truncated: 4 more columns]

## Sheet: Sheet4
Gene.ID	GeneSymbol	Cluster1	Cluster2	Cluster3	Ratio	specific phase	specificity	FDR	E12.5.1.Exp018736	E12.5.2.Exp018737	E12.5.3.Exp018738	E13.5.1.Exp018739	E13.5.2.Exp018740	E13.5.3.Exp018741	E14.5.1.Exp018742	E14.5.2.Exp018743	E14.5.3.Exp018744	E15.5.1.Exp018745	E15.5.2.Exp018746	E15.5.3.Exp018747	E16.5.1.Exp018748	E16.5.2.Exp018749	E16.5.3.Exp018750	E17.5.1.Exp018751	E17.5.2.Exp018752	E17.5.3.Exp018753	E18.5.1.Exp018754	E18.5.2.Exp018755	E18.5.3.Exp018756	D1.1.Exp018757	D1.2.Exp018758	D1.3.Exp018759	D3.1.Exp018760	D3.2.Exp018761	D3.3.Exp018762	D5.1.Exp018763	D5.2.Exp018764	D5.3.Exp018765	W1.1.Exp018766	W1.2.Exp018767	W1.3.Exp018768	W2.1.Exp018769	W2.2.Exp018770	W2.3.Exp018771	W3.1.Exp018772	W3.2.Exp018773	W3.3.Exp018774	W6.1.Exp018775	W6.2.Exp018776
215951	Afg1l	0	0	0.04	Inf	3	Cluster Enriched	0.301365	0	0	0	0	0	0	0	0	0	0	0	0	0	0	0	0	0	0	0	0	0	0	0	0	0	0	0	0	0	0	0	0	0	0	0	0	0	0	0	0	0
63857	Bco1	0.04	0.02	0.11	2.75	3	Cluster Enriched	0.243403	0	0	0	0	0.02	0.01	0	0	0	0	0	0	0.3	0.27	0	0	0	0	0	0	0	0	0	0	0.06	0.09	0.09	0.63	0.05	0.2	0.4	0.54	0.15	0	0	0	0	0	0	0	0
50908	C1s1	0	0.02	0.05	2.5	3	Cluster Enriched	0.0240834	0	0	0	0	0	0	0	0	0	0	0.01	0.02	0	0	0	0	0.04	0.05	0	0.1	0.06	0	0	0	0	0	0	0.12	0	0.1	0	0.07	0.07	0.18	0.13	0.08	0	0	0	0	0
68732	Carmil1	0.01	0.06	0.01	6	2	Cluster Enriched	0.0175429	0	0.01	0.05	0.02	0.02	0.01	0.01	0.02	0.01	0	0.01	0.01	0.01	0	0.02	0.01	0.02	0.03	0.07	0.05	0	0.01	0.09	0.05	0.29	0.05	0.05	0.02	0.08	0.01	0.04	0	0.07	0	0	0	0	0	0	0	0
67426	Coq8a	0.04	0.23	6.02	26.1739	3	Cluster Enriched	3.48e-08	0	0	0	0	0	0	0	0.1	0.1	0.02	0.02	0.09	0.09	0.03	0.12	0.06	0.13	0.22	0.14	0.19	0.21	0.31	0.09	0.24	0.56	0.15	0.5	0.92	0.91	1.08	3.97	1.28	1.36	9.8	5.86	7.92	10.42	11.54	11.15	7.27	10.81
226527	Cryzl2	0	0.1	0.53	5.3	3	Cluster Enriched	1.08e-06	0	0	0	0	0	0	0	0	0	0	0	0	0	0	0	0.04	0.06	0.05	0	0.03	0.2	0.03	0	0.08	0.07	0.54	0.05	0.28	0.31	0.79	0.13	0.84	1.41	0.72	0.54	1.25	0.34	0.46	0.32	0.24	0.53
226143	Cyp2c23	0.17	1.68	6.54	3.89286	3	Cluster Enriched	5.6e-07	0	0	0	0	0	0	0.12	0.63	0.33	0.19	0.18	0.08	0.1	0.08	0.88	0.31	0.12	0.66	0.93	0.41	0.56	0.81	0.7	2.95	1.29	6.33	5.14	5.58	5.01	8.76	1.08	8.52	8.12	4.87	2.63	3.54	1	2.83	3.79	15.35	6.55
217830	Dglucy	0	0	1.15	Inf	3	Cluster Enriched	0.000434358	0	0	0	0	0	0	0	0	0	0	0	0	0	0	0	0	0	0	0	0	0	0	0	0	0	0	0	0	0	0	0.07	0.05	0.16	0.26	0.21	0.44	1.02	1.73	1.56	1	2.47
13367	Diaph1	0.33	0.5	0.46	1.08696			0.109692	0.14	0.31	0.38	0.35	0.41	0.37	0.3	0.27	0.26	0.42	0.22	0.31	0.39	0.22	0.57	0.22	0.37	0.76	0.29	0.74	0.95	0.32	0.46	0.28	0.73	0.35	0.53	0.69	0.38	0.47	0.57	0.48	0.7	0.5	0.42	0.22	0.49	0.52	0.49	0.22	1.17
54004	Diaph2	0	0.11	0.75	6.81818	3	Cluster Enriched	0.00331368	0	0	0	0	0	0	0	0	0	0	0	0	0	0	0	0	0	0	0	0	0	0	0	0	0.91	0	0.42	0.37	0	0.03	1.81	1.12	0.78	1.68	0.91	0.04	0.01	0.02	2.68	0.1	2.46
380752	Eipr1	0.21	0.12	0.06	2			0.0954257	0.27	0.1	0.23	0.11	0.06	0.18	0.18	0.13	0.15	0.15	0.12	1.18	0.1	0.11	0.08	0	0.09	0.14	0.12	0.19	0	0.05	0.22	0.19	0.07	0.21	0.21	0	0	0	0	0.25	0.26	0	0	0	0.13	0	0.07	0.05	0.04
13821	Epb41l1	0.06	0.17	0.07	2.42857	2	Cluster Enriched	0.0245169	0.08	0.04	0	0.05	0.04	0.07	0.07	0.11	0.08	0.04	0.04	0.09	0.08	0.06	0.11	0.04	0.06	0.17	0.11	0.09	0.02	0.21	0.42	0.08	0.2	0.42	0.26	0.36	0.25	0.04	0.16	0.27	0.13	0	0	0	0	0	0	0	0
226352	Epb41l5	0.02	0.08	0.13	4			1.91e-05	0	0	0	0.01	0.01	0.01	0.02	0.02	0.03	0.02	0.03	0.04	0.03	0.03	0.04	0.05	0.06	0.17	0.07	0.05	0.09	0.03	0.06	0.03	0.09	0.13	0.07	0.05	0.1	0.06	0.09	0.1	0.09	0.05	0.12	0.08	0.13	0.18	0.19	0.31	0.05
106581	Fam234a	0	0.09	0.44	4.88889	3	Cluster Enriched	4.25e-07	0	0	0	0	0	0	0.01	0	0.02	0	0	0	0	0	0	0	0.01	0.05	0	0	0	0.07	0.06	0.15	0.18	0.1	0.41	0.09	0.21	0.19	0.21	0.24	0.32	0.61	0.91	0.78	0.36	0.41	0.18	0.34	0.39
16621	Gm45753	0	0.05	0.08	Inf			0.0151399	0	0	0	0	0	0	0	0	0	0	0	0	0	0	0	0.02	0.12	0.15	0.1	0.09	0.1	0.04	0	0.02	0	0	0	0	0	0	0	0	0	0.2	0	0.15	0.18	0	0.02	0.22	0.32
66387	Gm49405	0	0.05	0.7	14	3	Cluster Enriched	0.00261654	0	0	0	0	0	0	0	0	0	0	0	0	0	0	0	0	0	0	0	0	0	0	0	0	0.17	0	0.39	0	0.44	1.25	0	0	0	0.58	0.24	0.43	0.7	0.87	0.5	0.92	3.79
225884	Gstp3	3.46	9.44	22.89	2.42479	3	Cluster Enriched	0.0141902	0	0	0	0	0	0	2.4	11.15	14.34	2.24	3.43	6.6	2.06	3.35	6.32	6.15	4.5	14.03	13.22	10.54	2.62	7.56	5.48	5	13.42	14.18	16.58	17.13	26.13	15.7	20.6	11.53	25.98	18.57	31.34	22.28	25.49	22.88	19.6	120.51	4.94
29877	Hdgfl3	0	0	0.07	Inf	3	Cluster Enriched	0.267329	0	0	0	0	0	0	0	0	0	0	0	0	0	0	0	0	0	0	0	0	0	0	0	0	0	0	0	0	0	0	0	0	0	0	0	0	0	0	0	0	0
239217	Kctd12	0.62	1.49	1.47	2.37097			0.02729	0.56	0.26	0.6	0.31	0.37	0.39	0.34	0.82	0.71	1.06	0.53	0.88	0.82	0.35	1.25	1.57	0.94	1.1	1.18	1.17	0.92	1.14	1.12	0.94	3.76	2.44	1.65	2.21	2.64	2.57	2.53	4.48	2.88	1.7	1.41	1.39	1.32	0.72	0.8	0.88	0.23
72320	Kif1bp	0.06	0	0	Inf	1	Cluster Enriched	0.0126111	0	0.02	0.04	0.02	0.01	0.34	0.12	0.23	0.01	0.16	0	0.01	0	0	0	0	0	0	0	0	0	0	0	0	0	0	0	0	0	0	0	0	0	0	0	0	0	0	0	0	0
70266	Kyat1	0.09	0.93	3.43	3.68817	3	Cluster Enriched	3.04e-06	0	0	0	0.01	0.15	0.04	0.08	0.25	0.17	0.12	0.06	0.13	0.1	0.09	0.09	0.18	0.18	0.33	0.54	0.96	0.48	0.66	0.83	0.88	2.23	1.9	1.95	1.38	1.02	1.64	2.7	1.46	1.52	1.34	1.19	2.08	2.62	3.98	4.38	10.1	5.19
229905	Kyat3	0.21	8.79	49.34	5.6132	3	Cluster Enriched	1.89e-08	0.1	0.26	0.05	0.11	0.05	0.16	0.1	0.32	0.14	0.18	0.08	0.26	0.13	0.56	0.59	0.28	0.35	1.42	7.09	1.91	1.49	3.93	7.74	12.25	20.55	23.51	24.9	40.29	41.44	61.79	65.48	71.46	70.09	109.04	92.38	80.44	32.01	47.44	48.24	23.36	33.7
68241	Mcrip2	0	0	0.02	Inf	3	Cluster Enriched	0.435789	0	0	0	0	0	0	0	0	0	0	0	0	0	0	0	0	0	0	0	0	0	0	0	0	0	0	0	0	0	0	0	0	0	0	0	0	0	0	0	0	0
68347	Mettl26	1.15	4.04	24.38	6.03465	3	Cluster Enriched	1.8e-13	0.48	0.47	0.93	0.83	0.76	1.2	1.12	1.16	1.91	1.22	1.36	1.48	1.11	1.04	2.15	0.61	1.86	4.14	2.32	3.34	2.42	2.39	5.59	3.3	7.08	9.47	6	14.63	9.01	17.26	29.35	25.04	22.35	36.34	18.46	27.27	31.34	22.72	24.7	20.53	20.79
223646	Naprt	0.27	1.2	3.81	3.175	3	Cluster Enriched	4.26e-07	0.05	0.03	0.06	0.18	0.24	0.53	0.4	0.27	0.25	0.16	0.26	0.36	0.18	0.26	0.79	0.39	0.24	0.81	0.77	1.09	1.33	0.75	1.34	0.64	1.65	2.58	2.84	1.04	2.89	1.68	1.91	2.9	2.58	3.85	10.37	4.28	3.4	7.92	3.79	2.87	4.11
66116	Nat8f1	0	0.21	3.08	14.6667	3	Cluster Enriched	0.000123524	0	0	0	0	0	0	0	0	0	0	0	0	0	0	0	0	0	0	0.59	0.53	0	0	0	0	0.88	0.25	0.26	0.41	0.87	0.74	0	0	0	0.62	1.05	0.24	5.15	5.96	5.19	3.53	3.17
93673	Nat8f2	0	0.01	3.97	397	3	Cluster Enriched	0.000136182	0	0	0	0	0	0	0	0	0	0	0	0	0	0	0	0	0	0	0	0	0	0	0	0	0.1	0	0.01	0	0	0	0.47	0	0.2	0.62	0.74	2.86	5.11	6.08	4.21	11.08	6.28
69049	Nat8f5	0	0	0.11	Inf	3	Cluster Enriched	0.151575	0	0	0	0	0	0	0	0	0	0	0	0	0	0	0	0	0	0	0	0	0	0	0	0	0	0	0	0	0	0	0	0	0	0	0	0	0	0	0	0	0
68371	Pbld1	0.42	8.38	30.41	3.62888	3	Cluster Enriched	3.32e-10	0	0	0	0	0	0	0.07	0.79	0.45	0.17	0.24	0.6	0.24	0.12	3.55	1.4	2.56	7.4	10.09	6.26	5.8	10.25	7.89	6.65	18.01	13.27	10.97	17.39	10.16	12.19	30.99	12.37	16.73	24.72	27.72	28.98	56.49	51.59	51.17	44.21	29
67916	Plpp3	0	0.12	0.28	2.33333	3	Cluster Enriched	0.0324203	0	0	0	0.02	0	0.05	0	0	0	0	0	0	0	0	0	0	0	0	0	0	0	0.16	0	0.31	0	0.56	0.45	0	0	0	0	0.89	0.68	0.64	1.28	0.41	0	0	0	0.22	0
216454	Rdh16f2	0	0	3.56	Inf	3	Cluster Enriched	1.02e-11	0	0	0	0	0	0	0	0	0	0	0	0	0	0	0	0	0	0	0	0	0	0	0	0	0	0	0	0	1.66	2.14	4.44	2.61	2.76	2.22	2.88	4.34	3.25	6.39	5.39	4.63	5.84
15473	Rida	5.51	38.93	296.16	7.6075	3	Cluster Enriched	2.73e-11	1.14	1.22	5.52	1.88	3.38	1.9	4.56	10.64	8.7	5.98	5.63	6.23	6.97	3.09	15.8	9.98	14.39	25.6	24.01	31.36	28.66	39.5	44.21	33.07	67.24	77.53	71.6	141.37	123.71	141.92	154.41	239.69	160.52	240.82	229.73	273.94	265.07	402.98	318.23	559.98	516.45
74152	Stra6l	0	0	0.04	Inf	3	Cluster Enriched	0.00118311	0	0	0	0	0	0	0	0	0	0	0	0	0	0	0	0	0	0	0	0	0	0	0	0	0	0	0	0	0	0	0	0	0	0.03	0.04	0	0.16	0.11	0.1	0.04	0
192136	Sugct	0	0	0.43	Inf	3	Cluster Enriched	0.000104295	0	0	0	0	0	0	0	0	0	0	0	0	0	0	0	0	0	0	0	0	0	0	0	0	0	0	0	0.18	0.1	0.21	0	0.61	0.69	0.8	1.79	0.46	0.22	0.09	0.04	0	0.41
76971	Sult2a8	0	0	10.42	Inf	3	Cluster Enriched	0.00655243	0	0	0	0	0	0	0	0	0	0	0	0	0	0	0	0	0	0	0	0	0	0	0	0	0	0	0	0.46	0.09	0.24	0.94	0.56	1.36	2.9	1.45	3.56	8	12.76	6.62	14.28	7.97
319801	Tigar	0	0	0.04	Inf	3	Cluster Enriched	0.268308	0	0	0	0	0	0	0	0	0	0	0	0	0	0	0	0	0	0	0	0	0	0	0	0	0	0	0	0	0	0	0	0	0	0	0	0	0	0.38	0.43	0	0
69773	Timm29	0.08	0.06	0.34	4.25	3	Cluster Enriched	0.0106015	0.04	0	0.13	0.06	0.07	0	0.09	0	0.15	0.04	0.06	0.09	0.27	0	0.14	0	0.07	0.13	0	0	0	0	0	0	0.21	0.13	0.18	0.17	0.21	0	0	0	0	0.12	0	0.7	0.96	1.12	0.89	1.03	0
225913	Tkfc	1.94	19.16	92.81	4.84395	3	Cluster Enriched	4.15e-15	0.13	0.09	0.09	1.59	2.41	0.22	0.66	2.53	1.76	0.9	5.72	2.78	1.2	2.52	6.46	2.25	3.93	9.92	13.43	12.68	12.91	13.35	15.76	13.21	45.63	41.5	45.38	103.86	98.68	130.95	101.57	134.11	112.01	48.29	54.5	120.71	39.65	84.18	73.13	83.25	82.45
209039	Tns2	0	0.06	0.04	Inf			0.0377526	0	0	0	0	0	0	0	0	0	0	0	0	0	0	0	0	0	0	0	0	0	0.13	0.16	0.03	0.08	0.03	0.31	0.01	0.02	0.02	0	0.04	0.03	0	0.04	0.01	0.04	0.02	0.03	0.19	0.02
214290	Tut7	0.61	1.13	1.55	1.85246			0.629023	0.02	0.02	0.07	0.08	0.1	7.98	0.13	0.04	0.11	0.12	0.1	0.07	0.05	0.14	0.08	0.25	0.02	0.12	0	0.1	0.05	0.02	0.21	0	9.61	0.96	2.26	0.12	0.25	0.25	0.21	0.36	0.44	0.52	0.11	1.12	4.69	0.25	10.69	0.28	0
66050	0610009B22Rik	0.05	0.02	0.01	2.5	1	Cluster Enriched	0.140278	0	0	0	0	0.05	0.13	0	0.03	0.05	0.06	0.06	0.07	0.06	0.04	0.13	0	0	0	0	0	0	0	0	0	0.16	0.13	0	0	0	0	0	0	0	0.14	0.06	0	0	0	0	0	0
73212	3110082I17Rik	0.04	0	0	Inf	1	Cluster Enriched	0.03948	0.03	0	0.25	0.04	0.14	0.13	0	0	0	0	0	0	0	0	0	0	0	0	0	0	0	0	0	0	0	0	0	0	0	0	0	0	0	0	0	0	0	0	0	0	0
70591	5730455P16Rik	0.07	0	0.01	7	1	Cluster Enriched	0.452616	0	0	0	0	0	0	0.98	0	0.02	0	0	0	0	0	0	0	0	0	0	0	0	0	0	0	0	0	0	0	0	0	0	0	0	0	0.04	0.1	0	0	0	0	0
11656	Alas2	0.62	0.17	0	3.64706	1	Cluster Enriched	2.44e-12	0.62	0.51	0.55	0.79	0.34	0.48	0.66	0.42	0.69	0.91	0.72	0.47	1.08	0.72	0.35	0.38	0.51	0.22	0.05	0.11	0.27	0.04	0.46	0.01	0	0	0	0	0	0	0	0	0	0	0	0	0	0	0	0	0
13196	Asap1	0.09	0.03	0	3	1	Cluster Enriched	0.000109327	0.08	0.08	0.05	0.22	0.02	0.11	0.27	0.13	0.01	0.03	0.03	0.14	0.05	0.17	0.01	0.09	0.02	0.15	0.04	0.02	0	0.01	0.01	0.01	0.01	0	0.02	0.01	0.01	0	0	0	0	0	0	0	0	0	0	0	0
11979	Atp7b	0.18	0.07	0.04	2.57143	1	Cluster Enriched	0.11716	0.89	0.02	0.14	0.05	0.06	0.89	0.11	0.05	0.04	0.03	0.02	0.06	0.02	0.01	0.33	0.1	0.08	0.11	0.03	0.06	0	0.02	0.1	0.05	0.07	0.12	0.11	0	0	0	0.08	0.09	0.09	0.05	0.06	0.01	0.01	0.03	0.3	0	0
213539	Bag2	1.08	0.49	0	2.20408	1	Cluster Enriched	1.5e-07	1.4	0.9	2.55	1.5	0.64	1.08	0.86	0.7	0.6	0.86	1.89	0.4	0.57	1.96	0.28	0.63	0.55	0.26	0.61	1.36	0.24	0.51	0.64	0.12	0.54	0.28	0.11	0	0	0	0	0	0	0	0	0	0	0	0	0	0
12042	Bcl10	0.22	0	0	Inf	1	Cluster Enriched	0.0223685	1.02	0	0.89	0	0	0	0.71	0.73	0	0	0	0	0	0	0	0	0	0	0	0	0	0	0	0	0	0	0	0	0	0	0	0	0	0	0	0	0	0	0	0	0
14025	Bcl11a	0.06	0	0	Inf	1	Cluster Enriched	0.00152749	0.08	0.31	0.12	0.09	0.07	0	0.13	0	0.04	0	0	0	0.11	0.02	0	0	0	0	0	0	0	0	0	0	0	0	0	0	0	0	0	0	0	0	0	0	0	0	0	0	0
11799	Birc5	0.26	0.01	0	26	1	Cluster Enriched	2.47e-05	0.65	0.49	0.55	0.4	0.3	0.53	0.36	0	0.1	0.45	0.08	0	0	0	0	0.13	0.04	0	0	0	0	0	0	0	0	0	0	0	0	0	0	0	0	0	0	0	0	0	0	0	0
12301	Cacybp	10.14	4.24	2.34	2.39151	1	Cluster Enriched	3.07e-07	13.23	20.76	16.89	11.15	7.73	6.96	10.52	4.25	5.09	4.13	12.68	8.79	13.02	13.14	3.72	2.63	9.77	4.87	4.2	3.8	2.33	3.58	5.8	1.31	4.31	5.47	2.86	2.04	1.72	3	3.83	4.51	2.24	2.77	0.76	2.56	2	4.43	3.16	1.01	1.4
12442	Ccnb2	0.01	0	0	Inf	1	Cluster Enriched	0.354883	0	0.11	0.01	0	0	0	0	0	0	0	0	0	0	0	0	0	0	0	0	0	0	0	0	0	0	0	0	0	0	0	0	0	0	0	0	0	0	0	0	0	0
12445	Ccnd3	0.2	0.03	0.02	6.66667	1	Cluster Enriched	0.00010917	0.46	0.24	0.16	0.24	0.25	0.41	0.52	0.04	0.06	0	0.33	0.1	0.12	0	0.03	0.15	0.04	0.08	0	0	0	0	0	0	0	0.05	0.04	0	0	0	0	0.11	0.2	0	0	0	0	0	0	0	0
107995	Cdc20	0.03	0	0	Inf	1	Cluster Enriched	0.000183396	0.07	0.07	0.08	0.07	0.04	0.06	0.1	0	0.02	0	0	0	0	0	0	0	0	0	0	0	0	0	0	0	0	0	0	0	0	0	0	0	0	0	0	0	0	0	0	0	0
14793	Cdca3	0.01	0	0	Inf	1	Cluster Enriched	0.291288	0	0	0	0	0.03	0.14	0	0	0	0	0	0	0	0	0	0	0	0	0	0	0	0	0	0	0	0	0	0	0	0	0	0	0	0	0	0	0	0	0	0	0
52276	Cdca8	0.6	0.01	0	60	1	Cluster Enriched	1.93e-08	1.02	1.18	1.27	1.24	0.42	0.31	0.41	0.44	0.1	0.11	0.55	0.55	0.51	0.72	0.18	0	0	0	0.03	0.03	0.03	0	0	0	0	0	0	0	0	0	0	0	0	0	0	0	0	0	0	0	0
268663	Cdhr2	0.01	0	0	Inf	1	Cluster Enriched	0.0795457	0	0	0	0	0	0	0.08	0.06	0.04	0	0	0	0	0	0	0	0	0	0	0	0	0	0	0	0	0	0	0	0	0	0	0	0	0	0	0	0	0	0	0	0
23991	Cib1	0.15	0	0	Inf	1	Cluster Enriched	1.02e-08	0.13	0.1	0.22	0.13	0.13	0.13	0.38	0.23	0.16	0.13	0.05	0.3	0.07	0.09	0	0	0	0	0	0	0	0	0	0	0	0	0	0	0	0	0	0	0	0	0	0	0	0	0	0	0
66197	Cks2	1.65	0	0	Inf	1	Cluster Enriched	1.59e-09	2.63	2.14	4.16	1.38	2.15	2.59	0	0.97	1.5	1.03	1.04	1.87	1.51	0.82	0.98	0	0	0	0	0	0	0	0	0	0	0	0	0	0	0	0	0	0	0	0	0	0	0	0	0	0
98985	Clp1	0.03	0	0	Inf	1	Cluster Enriched	0.00981659	0	0.08	0.13	0	0	0	0	0	0	0.06	0.08	0.06	0	0	0	0	0	0	0	0	0	0	0	0	0	0	0	0	0	0	0	0	0	0	0	0	0	0	0	0	0
67655	Ctdp1	0.15	0.07	0	2.14286	1	Cluster Enriched	1.89e-05	0.1	0.19	0.22	0.23	0.49	0.22	0.21	0.06	0.05	0.09	0.1	0.03	0.1	0.12	0.02	0.05	0.06	0.03	0.08	0.04	0.02	0.09	0.07	0.05	0.13	0.2	0.04	0	0	0	0	0	0	0	0	0	0	0	0	0	0
192970	Dhrs11	1.25	0.53	0.45	2.35849	1	Cluster Enriched	6.89e-05	1.4	0.47	0.99	1.59	0.77	1.42	1.83	1.29	1.93	0.66	1.23	1.4	1.46	1.52	0.73	1.53	1.84	0.74	0.24	0.07	0.87	0.08	0.1	0.28	0.15	0.3	0.21	0.32	0.11	0.11	0.31	0.17	0.12	0.34	0.16	0.09	0.84	0.84	0.73	0.35	0.3
13605	Ect2	0.02	0	0	Inf	1	Cluster Enriched	0.00235192	0.01	0	0.08	0.05	0.03	0.01	0.05	0.01	0.05	0	0	0	0	0	0	0	0	0	0	0	0	0	0	0	0	0	0	0	0	0	0	0	0	0	0	0	0	0	0	0	0
208691	Eif5a2	3.33	0	0	Inf	1	Cluster Enriched	0.215949	34.37	15.56	0	0	0	0	0	0	0	0	0	0	0	0	0	0	0	0	0	0	0	0	0	0	0	0	0	0	0	0	0	0	0	0	0	0	0	0	0	0	0
84652	Fam126a	0.02	0	0	Inf	1	Cluster Enriched	0.0606499	0	0	0	0.03	0	0.01	0	0	0	0	0.03	0.13	0.01	0.04	0	0	0	0	0	0	0	0	0	0	0	0	0	0	0	0	0	0	0	0	0	0	0	0	0	0	0
67420	Far1	0.02	0	0	Inf	1	Cluster Enriched	0.00065343	0.05	0.02	0.02	0	0.05	0.08	0.06	0.02	0.03	0	0	0	0	0	0	0	0	0	0	0	0	0	0	0	0	0	0	0	0	0	0	0	0	0	0	0	0	0	0	0	0
56484	Foxo3	0.04	0.01	0	4	1	Cluster Enriched	2.99e-06	0.02	0	0.03	0.01	0.07	0.04	0.03	0.11	0.04	0.05	0.02	0.05	0.06	0.08	0	0	0.04	0.03	0	0	0	0	0	0	0	0	0	0	0	0	0	0	0	0	0	0	0	0	0	0	0
14287	Fpgs	0.01	0.01	0.01	1	1	Cluster Enriched	0.955271	0.02	0	0.06	0.02	0.02	0.03	0	0.01	0.01	0	0	0	0	0	0	0	0	0	0	0	0	0	0	0	0	0.06	0.05	0	0	0	0.02	0	0.18	0	0	0	0	0	0	0	0.01
74105	Gga2	2.02	0.89	0	2.26966	1	Cluster Enriched	0.459952	0.16	0.26	0.24	0.12	0.38	0.38	27.74	0.27	0.27	0.03	0.05	0.18	0.07	0.1	0.08	0.05	0.12	0.43	0.04	9.6	0.19	0.03	0.02	0.03	0.03	0	0.11	0	0.05	0.03	0	0	0	0	0	0	0	0	0	0	0
66355	Gmpr	6.25	2.32	0.06	2.69397	1	Cluster Enriched	2.22e-15	7.81	8.7	7.17	6.35	6.35	5.09	9.74	5.94	7.54	5.08	4.29	4.74	5.17	6.34	3.4	2.69	3.56	3.26	4.06	1.57	2.54	0.99	2.36	1.03	0.13	2.55	3.12	0.28	0.3	0.08	0.11	0	0.22	0	0	0	0	0	0	0	0
69237	Gtpbp4	0.47	0.16	0.02	2.9375	1	Cluster Enriched	0.0175697	0.17	2.77	0.23	0.63	0.26	0.38	0.47	0.09	0.2	0.05	0.18	0.9	0.2	0.4	0.11	0.06	0.16	0.11	0.03	0.13	0.08	0.07	0.25	0.05	0.25	0.52	0.22	0.06	0.08	0.08	0.08	0.06	0.03	0	0	0	0	0	0	0	0
15366	Hmmr	0.28	0.02	0	14	1	Cluster Enriched	1.52e-05	0.29	0.35	0.35	0.23	0.27	0.2	0.17	0.26	0.09	0.04	0.33	0.25	1.13	0.26	0.02	0.05	0.09	0.06	0	0	0	0	0	0	0	0	0	0	0	0	0	0	0	0	0	0	0	0	0	0	0
22778	Ikzf1	0.21	0.01	0	21	1	Cluster Enriched	4.55e-08	0.29	0.07	0.55	0.26	0.15	0.1	0.07	0.26	0.12	0.18	0.14	0.38	0.12	0.36	0.08	0.02	0.1	0.03	0	0	0	0	0	0	0	0	0	0	0	0	0	0	0	0	0	0	0	0	0	0	0
114663	Impa2	0.21	0.07	0.01	3	1	Cluster Enriched	4.07e-07	0.23	0.2	0.55	0.12	0.19	0.37	0.11	0.3	0.31	0.12	0.15	0.19	0.11	0.09	0.1	0.02	0.09	0.16	0.12	0	0.04	0	0.09	0.08	0.08	0.13	0	0.1	0.09	0	0	0	0	0	0	0	0	0	0	0	0
69046	Isca1	0.49	0.2	0	2.45	1	Cluster Enriched	1.81e-07	0.21	0.47	0.86	0.74	0.38	0.33	0.48	0.57	0.45	0.29	0.48	0.58	0.27	0.45	0.86	0.06	0.18	0.84	0.04	0	0.77	0.27	0.18	0	0	0	0	0	0	0	0	0	0	0	0	0	0	0	0	0	0
219094	Khnyn	0.01	0	0	Inf	1	Cluster Enriched	0.121066	0	0	0	0	0	0	0	0	0	0	0.02	0.06	0.01	0	0.01	0	0	0	0	0	0	0	0	0	0	0	0	0	0	0	0	0	0	0	0	0	0	0	0	0	0
208628	Kntc1	0.05	0	0	Inf	1	Cluster Enriched	3.5e-10	0.08	0.03	0.08	0.05	0.07	0.07	0.09	0.05	0.03	0.04	0.03	0.04	0.05	0.01	0.01	0.03	0.01	0.02	0	0	0	0	0	0	0	0	0	0	0	0	0	0	0	0	0	0	0	0	0	0	0
16852	Lgals1	42.98	20.25	11.34	2.12247	1	Cluster Enriched	8e-08	50.99	44.62	93.31	32.65	48.66	44.42	38.54	28.86	33.35	43.7	25.55	39.79	53.27	35.05	31.87	40.07	23.77	36.53	17.81	13.57	26.07	11.62	10.01	17.21	15.28	15.9	15.16	24.56	11.83	30.66	11.76	21.51	22.59	11.56	16.01	17.66	4.42	5.93	7.25	2.42	1.64
100604	Lrrc8c	0.04	0.01	0.01	4	1	Cluster Enriched	0.00170416	0.05	0.03	0.03	0.07	0.04	0.04	0.05	0.01	0.04	0.02	0.07	0.04	0.05	0.05	0	0.03	0.09	0	0	0	0	0	0	0	0	0	0	0.09	0	0.05	0	0	0	0	0	0	0	0	0	0	0
17120	Mad1l1	0.22	0.05	0.06	3.66667	1	Cluster Enriched	0.00676992	0.18	0.12	0.61	0.04	0.39	0.19	0.11	0.23	0.12	0.33	0.14	0.28	0.24	0.08	0.25	0.07	0.04	0.06	0.08	0.04	0.04	0.06	0.1	0.02	0	0.05	0.09	0.75	0.05	0	0.06	0.02	0.03	0.17	0.02	0	0	0	0	0	0
26921	Map4k4	0.01	0	0	Inf	1	Cluster Enriched	0.725755	0	0.01	0.01	0.03	0	0.06	0	0	0	0	0	0	0	0	0	0	0	0	0	0	0	0	0	0	0	0.02	0.01	0	0	0	0	0	0	0.02	0.07	0	0	0	0	0	0
66405	Mcts2	0.09	0	0	Inf	1	Cluster Enriched	0.000579943	0.35	0.25	0.18	0.12	0.14	0.21	0.08	0.04	0.03	0	0	0	0	0	0	0	0	0	0	0	0	0	0	0	0	0	0	0	0	0	0	0	0	0	0	0	0	0	0	0	0
59024	Med12	0.01	0	0	Inf	1	Cluster Enriched	4.63e-09	0.01	0.01	0	0.02	0.02	0.01	0.01	0.02	0.01	0	0.02	0.01	0.03	0.01	0.01	0	0	0	0	0	0	0	0	0	0	0	0	0	0	0	0	0	0	0	0	0	0	0	0	0	0
69792	Med6	0.01	0	0	Inf	1	Cluster Enriched	0.102152	0	0	0	0.04	0.06	0.11	0	0	0	0	0	0	0	0	0	0	0	0	0	0	0	0	0	0	0	0	0	0	0	0	0	0	0	0	0	0	0	0	0	0	0
171580	Mical1	0.01	0	0	Inf	1	Cluster Enriched	0.0261095	0.07	0.01	0.05	0.07	0.02	0	0	0	0	0	0	0	0	0	0	0	0	0	0	0	0	0	0	0	0	0	0	0	0	0	0	0	0	0	0	0	0	0	0	0	0
74522	Morc2a	0.03	0	0	Inf	1	Cluster Enriched	0.0799924	0.01	0.04	0.23	0.05	0.04	0.04	0	0	0	0	0	0	0	0	0	0	0	0	0	0	0	0	0	0	0	0	0	0	0	0	0	0	0	0	0	0	0	0	0	0	0
17535	Mre11a	0.14	0.06	0.01	2.33333	1	Cluster Enriched	6.42e-08	0.24	0.11	0.18	0.14	0.2	0.14	0.26	0.17	0.12	0.08	0.07	0.1	0.12	0.1	0.05	0.07	0.06	0.12	0	0.04	0.04	0.03	0.11	0.02	0.12	0.04	0.04	0	0	0	0.14	0	0.05	0.04	0	0.02	0	0	0	0	0
72083	Mzt2	0.01	0	0	Inf	1	Cluster Enriched	0.182004	0.07	0	0.05	0	0	0	0	0	0	0	0	0	0	0	0	0	0	0	0	0	0	0	0	0	0	0	0	0	0	0	0	0	0	0	0	0	0	0	0	0	0
17974	Nck2	0.15	0.02	0.01	7.5	1	Cluster Enriched	0.202064	0	0.05	0.11	0	0.14	0.09	0.03	0.05	0.08	0	0.03	0.05	1.54	0.06	0.03	0	0.02	0.09	0	0	0	0	0	0	0.09	0	0.02	0	0.05	0.03	0	0.02	0.02	0	0	0	0	0	0	0	0
29812	Ndrg3	0.56	0.14	0	4	1	Cluster Enriched	5.12e-10	0.91	0.23	1.21	0.8	0.69	0.65	0.45	0.67	0.42	0.48	0.3	0.61	0.39	0.34	0.29	0.44	0.23	0.07	0.21	0	0.37	0	0.07	0.09	0	0.13	0.1	0	0	0	0	0	0	0	0	0	0	0	0	0	0
97112	Nmd3	0.12	0.05	0.02	2.4	1	Cluster Enriched	3.7e-05	0.07	0.1	0.27	0.15	0.17	0.21	0.14	0	0.14	0.1	0.12	0.11	0.13	0.12	0.03	0	0	0	0	0	0	0	0.14	0.05	0.16	0.09	0.2	0.07	0.06	0.05	0	0	0	0	0	0	0	0	0	0	0
171567	Nme7	0.1	0.03	0	3.33333	1	Cluster Enriched	5.64e-06	0.11	0.09	0.3	0.14	0.1	0.07	0.19	0.04	0.04	0.05	0.09	0.04	0.15	0.13	0	0.11	0.1	0.06	0	0	0	0	0	0	0.05	0	0.04	0	0	0	0	0	0	0	0	0	0	0	0	0	0
11819	Nr2f2	0.07	0	0	Inf	1	Cluster Enriched	0.260657	0.04	0	0.8	0.01	0.05	0.03	0	0	0	0	0.01	0.03	0	0.01	0.02	0	0	0	0	0	0	0	0	0	0	0	0	0	0	0	0	0	0	0	0	0	0	0	0	0	0
68501	Nsmce2	0.05	0	0	Inf	1	Cluster Enriched	2.02e-05	0.1	0	0.12	0.11	0.08	0	0.02	0.05	0	0	0.07	0.05	0	0.07	0.04	0	0.02	0.02	0	0	0	0	0	0	0	0	0	0	0	0	0	0	0	0	0	0	0	0	0	0	0
56488	Nxt1	0.11	0	0	Inf	1	Cluster Enriched	0.0123036	0.38	0	0.53	0	0	0	0.24	0.23	0.22	0	0	0	0	0	0	0	0	0	0	0	0	0	0	0	0	0	0	0	0	0	0	0	0	0	0	0	0	0	0	0	0
11546	Parp2	0.07	0.02	0	3.5	1	Cluster Enriched	7.34e-11	0.09	0.1	0.11	0.09	0.12	0.08	0.07	0.05	0.07	0.04	0.06	0.03	0.07	0.07	0.02	0.07	0	0.02	0.02	0.04	0.01	0	0	0	0.03	0.01	0.05	0	0	0	0	0	0	0	0	0	0	0	0	0	0
170736	Parvb	0.98	0.42	0.05	2.33333	1	Cluster Enriched	0.0114434	0.69	3.9	0.34	3.09	0.16	0.45	0.62	0.15	0.14	0.63	0.1	0.13	0.93	3.26	0.09	0.16	0.5	0.08	0.75	0.72	0.1	0.06	1.42	0.15	0.25	0.53	0.38	0.14	0.2	0.14	0	0	0	0.15	0.08	0.15	0	0	0	0	0
52033	Pbk	0.69	0.01	0	69	1	Cluster Enriched	1.01e-05	0.24	0.36	2.7	0.68	0.34	0.74	0.63	0.39	1.34	0.48	0.64	0.82	0.44	0.46	0.13	0	0.07	0.08	0	0	0	0	0	0	0	0	0	0	0	0	0	0	0	0	0	0	0	0	0	0	0
100102	Pcsk9	0.03	0	0	Inf	1	Cluster Enriched	0.00182263	0.04	0.13	0	0	0	0	0.05	0.03	0.02	0.01	0.04	0.03	0.05	0	0.03	0	0.04	0.02	0	0	0	0	0	0	0	0	0	0	0	0	0	0	0	0	0	0	0	0	0	0	0
18596	Pdgfrb	0.06	0.01	0	6	1	Cluster Enriched	0.40138	0.89	0	0.02	0	0.01	0.02	0	0	0	0	0	0	0	0	0	0	0	0	0	0	0	0	0	0	0.05	0	0.02	0	0	0	0	0	0	0	0	0	0	0	0	0	0
236900	Pdk3	0.08	0	0	Inf	1	Cluster Enriched	0.000333622	0.09	0	0.12	0.03	0.28	0.11	0.06	0	0.03	0.07	0.02	0.06	0.29	0.04	0	0	0	0	0	0	0	0	0	0	0	0	0	0	0	0	0	0	0	0	0	0	0	0	0	0	0
18645	Pfn2	0.08	0	0.01	8	1	Cluster Enriched	0.179255	0	0.2	0.7	0.12	0	0.14	0	0	0	0	0	0	0	0	0	0	0	0	0	0	0	0	0	0	0	0	0	0	0	0	0	0	0	0	0	0	0	0	0	0	0
56012	Pgam2	0.88	0	0	Inf	1	Cluster Enriched	0.189411	0	0	0	0	0	0	0	8.08	5.06	0	0	0	0	0	0	0	0	0	0	0	0	0	0	0	0	0	0	0	0	0	0	0	0	0	0	0	0	0	0	0	0
18769	Pkig	0.02	0	0	Inf	1	Cluster Enriched	0.206524	0	0	0	0	0.12	0.24	0	0	0	0	0	0	0	0	0	0	0	0	0	0	0	0	0	0	0	0	0	0	0	0	0	0	0	0	0	0	0	0	0	0	0
18783	Pla2g4a	0.08	0.02	0.01	4	1	Cluster Enriched	0.000214384	0.07	0.12	0.13	0.11	0.28	0.11	0.05	0.08	0.04	0.02	0.03	0.05	0.05	0.02	0	0	0	0	0.08	0.05	0.02	0	0.02	0.02	0	0	0	0.05	0	0.06	0	0	0	0	0	0	0	0	0	0	0
18817	Plk1	0.13	0	0	Inf	1	Cluster Enriched	0.000341432	0.09	0.19	0.11	0.22	0.63	0.09	0.16	0.03	0.06	0	0.09	0.08	0.07	0.14	0.03	0.03	0.01	0	0	0	0	0	0	0	0	0	0	0	0	0	0	0	0	0	0	0	0	0	0	0	0
59001	Pole3	8.77	0.5	0.02	17.54	1	Cluster Enriched	0.0304861	0	0.46	30.72	48.04	13.01	0.62	0	0.46	2.64	0.38	33.61	0.65	0.34	0.36	0.24	0.3	0.16	0.29	0.24	0	0.16	1.31	0	3.54	0	0	0	0.16	0	0.24	0	0	0	0	0	0	0	0	0	0	0
233406	Prc1	0.13	0.01	0	13	1	Cluster Enriched	4.61e-07	0.08	0.06	0.31	0.1	0.3	0.22	0.17	0.24	0.1	0.06	0.03	0.04	0.06	0.07	0.07	0.03	0.02	0	0.01	0	0.04	0	0	0	0	0	0	0	0	0	0	0	0	0	0	0	0	0	0	0	0
19088	Prkar2b	0.83	0.37	0.09	2.24324	1	Cluster Enriched	1.06e-08	0.84	0.66	1.97	1.02	1.15	0.88	0.91	0.57	0.91	0.53	0.61	0.72	0.64	0.46	0.58	0.5	0.2	0.53	0.34	0.32	0.65	0.42	0.23	0.29	0.34	0.18	0.41	0.15	0.3	0.25	0.41	0	0.57	0	0	0	0	0	0	0	0
101739	Psip1	1.29	0.64	0.42	2.01562	1	Cluster Enriched	8.76e-07	2.12	0.96	2.85	1.13	1.49	1.38	1.35	1.06	0.78	1.45	1.14	1.16	0.6	1.03	0.83	0.97	1.08	0.78	0.18	0.45	0.79	0.35	0.35	0.58	0.91	0.55	0.69	0.22	0.43	0.57	0.5	0.87	0.51	0.43	0.48	0.4	0.52	0.47	0.47	0.17	0.39
53380	Psmd10	0.19	0.08	0	2.375	1	Cluster Enriched	2.67e-06	0.11	0.1	0.48	0.06	0.27	0.31	0.01	0.22	0.31	0.11	0.04	0.23	0.12	0.23	0.21	0.11	0.12	0.22	0	0.13	0.18	0	0	0	0.06	0	0.11	0	0	0	0	0	0	0	0	0	0	0	0	0	0
27388	Ptdss2	0.16	0	0	Inf	1	Cluster Enriched	0.0288718	0.26	0	0.24	0.9	0.08	0.13	0.79	0	0.02	0	0	0	0	0	0	0	0	0	0	0	0	0	0	0	0	0	0	0	0	0	0	0	0	0	0	0	0	0	0	0	0
19231	Ptma	238.84	20.8	10.82	11.4827	1	Cluster Enriched	5.2e-09	215.88	241.83	525.62	326.98	306.11	382.74	316.51	269.04	284.42	132.43	198.36	150.32	0	151.11	81.22	0	0	0	0	0	0	0	0	0	0	168.19	81.38	0	0	0	0	0	0	78.43	116.41	0	0	0	0	0	0
75767	Rab11fip1	0.02	0	0	Inf	1	Cluster Enriched	0.0358819	0.01	0	0.01	0	0.03	0.05	0	0.02	0.11	0	0.02	0.01	0	0	0	0	0.01	0.03	0	0	0	0	0	0	0	0	0	0	0	0	0	0	0	0	0	0	0	0	0	0	0
215653	Rassf2	0.01	0	0	Inf	1	Cluster Enriched	0.2902	0	0	0	0	0	0	0	0.08	0.05	0	0	0	0	0	0	0	0.02	0.03	0	0	0	0	0	0	0	0	0	0	0	0	0	0	0	0	0	0	0	0	0	0	0
24105	Rbck1	0.07	0	0	Inf	1	Cluster Enriched	0.41003	0.01	0	1.06	0	0	0	0	0	0	0	0	0	0	0	0	0	0	0	0	0	0	0	0	0	0	0	0	0	0	0	0	0	0	0	0	0	0	0	0	0	0
19821	Rnf2	0.26	0.08	0.01	3.25	1	Cluster Enriched	1.91e-06	0.31	0.1	0.7	0.39	0.34	0.35	0.29	0.27	0.39	0.07	0.11	0.1	0.19	0.19	0.07	0.05	0	0.13	0	0.27	0.1	0	0	0	0.19	0	0.2	0	0	0	0	0	0	0.04	0	0.09	0	0	0	0	0
19895	Rpia	1.36	0.64	0.07	2.125	1	Cluster Enriched	2.9e-12	1.69	0.99	1.71	1.72	1.33	1.5	1.07	1.36	1.37	1.42	1.35	1.51	2.14	0.66	0.64	1.17	1.21	1.17	0.22	0.62	0.35	0.89	0.38	0.58	0.32	0.4	0.31	0.34	0.23	0.62	0	0	0	0	0.02	0.04	0	0	0	0	0
66229	Rpl7l1	0.1	0	0	Inf	1	Cluster Enriched	0.00235135	0	0.48	0.21	0.29	0.13	0.17	0.12	0.05	0.1	0	0	0	0	0	0	0	0	0	0	0	0	0	0	0	0	0	0	0	0	0	0	0	0	0	0	0	0	0	0	0	0
12401	Serpina6	1.57	0.27	0.25	5.81481	1	Cluster Enriched	2.39e-06	0.92	1.2	2.75	2.57	1.2	0.8	2.93	1.68	2.66	1.64	0.63	1.72	1.11	0.75	1.06	1.35	1.49	0.35	0	0	0	0	0	0	0	0	0	0	0	0	0	0	0	0.25	0.06	0.12	2.33	0.26	0.19	0.29	0.69
209011	Sirt7	0.01	0	0	Inf	1	Cluster Enriched	0.206442	0	0	0	0.03	0.06	0	0	0	0	0	0	0	0	0	0	0	0	0	0	0	0	0	0	0	0	0	0	0	0	0	0	0	0	0	0	0	0	0	0	0	0
20698	Sphk1	0.02	0	0	Inf	1	Cluster Enriched	0.0529647	0	0	0	0	0	0	0.07	0	0.01	0.09	0.06	0	0	0	0	0	0	0	0	0	0	0	0	0	0	0	0	0	0	0	0	0	0	0	0	0	0	0	0	0	0
16765	Stmn1	22.76	11.11	2.83	2.0486	1	Cluster Enriched	1.2e-06	22.49	10.99	46.32	15.95	30.75	42.92	14.99	37.74	31.16	14.68	11.01	25.28	18.11	12.73	6.31	14.56	17.73	32.36	5.7	9.04	15.35	5.19	4.27	6.82	9.31	5.35	7.59	5.76	6.49	9.6	2.59	4.28	6	3.42	3.53	3.42	1.43	1.95	2.52	0	0
20744	Strbp	0.8	0.25	0.14	3.2	1	Cluster Enriched	0.241742	0.34	7.46	0.22	0.26	0.54	0.47	0.25	0.27	0.34	0.26	0.43	0.52	0.37	0.14	0.18	0.16	0.15	0.64	0.05	0.12	0.48	0.1	0.14	0.09	0.15	0.21	0.66	0.09	0.26	0.05	0.17	0.13	0.6	0.25	0.19	0	0.02	0.06	0.43	0	0
217353	Tmc6	0.01	0	0	Inf	1	Cluster Enriched	0.176284	0	0	0	0	0	0	0.06	0	0.05	0	0	0	0	0	0	0	0	0	0	0	0	0	0	0	0	0	0	0	0	0	0	0	0	0	0	0	0	0	0	0	0
72749	Tonsl	0.01	0	0	Inf	1	Cluster Enriched	0.0096766	0.01	0.01	0.04	0.01	0.03	0.03	0	0	0	0	0	0	0	0	0	0	0	0	0	0	0	0	0	0	0	0	0	0	0	0	0	0	0	0	0	0	0	0	0	0	0
70827	Trak2	0.01	0	0	Inf	1	Cluster Enriched	0.0450651	0	0	0	0	0.03	0.01	0	0	0	0.04	0	0.05	0	0	0	0	0	0	0	0	0	0	0	0	0	0	0	0	0	0	0	0	0	0	0	0	0	0	0	0	0
232670	Tspan33	0.33	0.06	0	5.5	1	Cluster Enriched	4.76e-05	0.25	0.26	0.22	0.29	0.27	0.34	0.5	0.13	0	0.25	0.44	1.32	0.38	0.29	0.08	0.29	0.2	0	0.07	0.17	0	0	0	0	0	0	0	0	0	0	0	0	0	0	0	0	0	0	0	0	0
74196	Ttc27	0.14	0.01	0	14	1	Cluster Enriched	0.00235289	0.12	0.07	0.65	0.08	0.45	0.06	0.11	0.04	0.02	0.08	0.07	0.18	0.05	0.04	0.05	0.06	0.02	0.03	0.04	0	0.02	0	0	0	0	0	0	0	0.03	0.01	0	0	0	0	0	0	0	0	0	0	0
68612	Ube2c	3.52	0.89	0.16	3.95506	1	Cluster Enriched	2.92e-13	3.8	2.82	4.21	2.9	4.98	4.86	3.81	2.45	4.07	2.69	2.88	4.13	4.55	2.68	1.96	2.21	1.29	2.56	0.52	1.47	1.01	0.45	1.14	0	0	0	0	0.78	2.07	0.12	0	0	0	0	0	0	0	0	0	0	0
383295	Ypel5	0.34	0.13	0.08	2.61538	1	Cluster Enriched	0.0105882	0.08	0	0.18	0.73	0.95	0.11	0.87	0.53	0.5	0.1	0.4	0.11	0	0.23	0.24	0.34	0.12	0.41	0	0	0	0	0	0	0.25	0.32	0.07	0.29	0.12	0	0.23	0.51	0	0	0	0	0	0	0	0.18	0.11
269639	Zfp512	0.03	0	0	Inf	1	Cluster Enriched	0.338808	0	0.05	0.42	0	0	0	0	0	0	0	0	0	0	0	0	0	0	0	0	0	0	0	0	0	0	0	0	0	0	0	0	0	0	0	0	0	0	0	0	0	0
67469	Abhd5	0	0.09	0.02	4.5	2	Cluster Enriched	0.00229264	0	0	0	0	0	0	0	0	0	0	0	0	0	0	0	0	0	0	0.15	0.13	0	0	0.07	0.08	0.24	0.19	0.19	0.14	0.07	0.18	0	0	0	0	0	0	0	0	0	0	0
11486	Ada	0.13	0.48	0.11	3.69231	2	Cluster Enriched	0.232009	0.15	0.09	0.27	0.2	0.23	0.13	0.11	0.06	0.08	0.08	0.06	0.06	0.1	0.22	0.04	0.04	0.1	0.09	0.06	0.17	0.09	0.13	0.03	0.37	0.4	0.27	3.99	0.16	0.32	0.33	0.34	0.19	0.16	0.06	0.07	0.01	0	0	0	0	0.06
11647	Alpl	0.02	0.07	0.01	3.5	2	Cluster Enriched	0.00622396	0	0	0	0	0	0	0	0.05	0.03	0.02	0.08	0.02	0.01	0	0.04	0.03	0	0.04	0.03	0	0.04	0.02	0.21	0.12	0.05	0.22	0.11	0	0.14	0.07	0	0	0	0	0	0	0	0	0	0	0
11722	Amy1	0	0.21	0.05	4.2	2	Cluster Enriched	0.0142721	0	0	0	0	0	0	0	0	0	0	0	0	0	0	0	0	0.85	0.77	0.05	0.03	0	0.05	0.02	0.03	0.13	0.03	0.61	0	0	0	0.12	0.04	0.27	0	0.08	0.07	0.03	0.07	0	0	0.04
11735	Ank3	0.19	0.4	0.19	2.10526	2	Cluster Enriched	0.0497652	0.16	0.07	0.11	0.32	0.11	0.21	0.18	0.17	0.16	0.29	0.24	0.21	0.24	0.23	0.19	0.25	0.36	0.39	0.14	0.35	0.38	0.22	1.65	0.22	0.32	0.41	0.15	0.14	0.23	0.06	0.49	0.3	0.29	0.46	0.33	0.08	0.22	0.15	0.09	0.19	0.11
12306	Anxa2	7.57	25.53	11.7	2.18205	2	Cluster Enriched	4.99e-06	4.72	5.26	5.18	5.31	4.76	5.4	7.21	10.41	6.57	8.2	7.52	10.29	7.15	5.21	20.41	12.82	11.48	40.07	22.44	26.84	30.84	25.43	29.35	22.84	40.52	23.94	19.82	35.16	14.59	19.49	15.34	20.34	22.41	11.93	16.26	15.19	7.08	7.21	6.65	4.84	3.3
11821	Aprt	4.1	12.12	3.29	2.9561	2	Cluster Enriched	3.55e-06	2.64	3.48	5.92	2.23	4.23	3.9	1.86	4.08	5.72	2.5	1.85	8.32	2.29	1.57	10.91	3.35	2.6	24.51	11.51	13.39	12.69	7.64	11.29	13.87	15.07	9.99	19.52	9.93	4.84	9.28	6.16	3.15	6.39	4.14	1.91	1.99	1.34	1.76	2.6	1.06	0.94
110382	C8b	0.07	0.4	0.1	4	2	Cluster Enriched	0.0082634	0	0	0	0	0	0	0.01	0.11	0.07	0.03	0.07	0.2	0.06	0.08	0.41	0.24	0.32	1.38	0.45	0.76	1.27	0.14	0.07	0.05	0.02	0.07	0.02	0.03	0	0.05	0.01	0.02	0	0.05	0.1	0	0.16	0.14	0.15	0.18	0.08
12527	Cd9	0.45	3	0	6.66667	2	Cluster Enriched	1.43e-08	0	0	0	0	0	0	0.76	0.8	0.71	0	1.6	0.79	0.8	1.27	0	0	4.17	3.03	3.08	2.39	2.09	5.59	5.42	4.75	1.58	0	3.96	0	0	0	0	0	0	0	0	0	0	0	0	0	0
240505	Cdc42bpg	0	0.01	0	Inf	2	Cluster Enriched	0.174367	0	0	0	0	0	0	0	0	0	0	0	0	0	0	0	0	0	0	0	0	0	0	0	0	0.02	0	0.08	0	0	0	0	0	0	0	0	0	0	0	0	0	0
56358	Copz2	0.01	0.76	0.13	5.84615	2	Cluster Enriched	0.172701	0	0	0	0	0	0	0	0.07	0.06	0	0	0	0	0	0	0	0	0	0	6.75	0.14	1.37	0	0.15	0.36	0.39	0	0.46	0.31	0.26	0	0.17	0.42	0	0.38	0.34	0	0	0	0	0
109821	F11	0	0.09	0	Inf	2	Cluster Enriched	0.00688768	0	0	0	0	0	0	0	0	0	0.01	0.02	0	0	0	0	0.04	0.05	0.46	0.06	0.07	0.25	0	0	0	0.05	0	0.08	0	0	0	0.02	0	0.04	0	0	0	0	0	0	0	0
14060	F13b	0	0.02	0	Inf	2	Cluster Enriched	0.188155	0	0	0	0	0	0	0	0	0	0	0	0	0	0	0	0	0	0	0.04	0.19	0	0	0	0	0	0	0	0	0	0	0	0	0	0	0	0	0	0	0	0	0
63913	Fam129a	0.12	0.92	0.31	2.96774	2	Cluster Enriched	3.95e-06	0	0.01	0.02	0.02	0.02	0.02	0.04	0.31	0.13	0.15	0.1	0.14	0.12	0.03	0.62	0.36	0.31	1.09	1.23	0.65	0.99	1.96	1.39	0.57	0.83	0.99	0.72	0.64	0.99	0.73	0.64	0.77	0.87	0.25	0.23	0.23	0.15	0.01	0.03	0	0
110135	Fgb	1.7	18.83	7.55	2.49404	2	Cluster Enriched	6.34e-06	0.68	0.58	0.74	0.5	1.01	0.59	1.25	2.31	2.02	1.75	1.58	2.23	1.27	1.38	7.62	3.19	3.65	55.81	22.21	22.49	24.19	15.29	16.96	11.89	21.43	14.63	14.2	8.41	5.63	14.87	7.88	14.66	7.41	7.45	5.87	6.04	6.14	6.79	7.98	8.78	4.47
53334	Gosr1	0.03	0.21	0.04	5.25	2	Cluster Enriched	0.0207591	0	0.1	0.07	0	0	0	0	0	0	0.1	0.03	0.09	0.05	0	0.05	0.42	0.05	0	0	0	0	0.07	0.11	0.44	0.71	0	0.72	0.17	0	0.47	0	0	0	0	0	0	0	0	0	0	0
68153	Gtf2e2	0.12	0.27	0	2.25	2	Cluster Enriched	0.0278611	0.24	0.18	0.07	0.09	0.12	0.13	0.05	0.13	0.06	0	0.16	0.11	0	0.12	0.37	0	0.73	0.91	0	0.09	0.15	0	0	0	0	1.3	0.03	0	0	0	0	0	0	0	0	0	0	0	0	0	0
16006	Igfbp1	0	0.16	0.07	2.28571	2	Cluster Enriched	0.192077	0	0	0	0	0	0	0	0	0	0	0	0	0	0	0	0	0	0	0	0	0	0.11	0	0.63	0.11	0.69	0.39	1.06	0	0.15	0	0	0	0	0	0	0	0	0	0	0
16403	Itga6	0.05	0.16	0.06	2.66667	2	Cluster Enriched	0.247101	0.02	0.01	0.04	0.06	0.02	0.02	0.08	0.07	0.04	0.02	0.08	0.11	0.08	0.02	0.02	0.01	0.02	0.04	0.11	0.09	0	0.03	0.06	0.55	0.03	0.03	0.94	0.01	0	0.21	0.02	0.51	0.26	0.02	0	0.07	0	0	0	0	0
16803	Lbp	0	0.03	0.01	3	2	Cluster Enriched	0.119233	0	0	0	0	0	0	0	0	0	0	0	0	0	0	0	0	0.02	0.02	0	0	0	0.04	0	0.04	0	0.04	0.15	0	0	0	0	0.11	0.07	0	0	0	0	0	0	0	0
56727	Miox	0.01	0.18	0.06	3	2	Cluster Enriched	0.324499	0	0	0	0	0	0	0	0	0	0	0.07	0.04	0	0	0	0	0	0	0	0	0	0	0	0	0.19	0.19	1.77	0.66	0.23	0.13	0	0	0	0	0	0	0	0	0	0	0
50918	Myadm	0.32	2.3	0.7	3.28571	2	Cluster Enriched	2.33e-07	0.05	0	0.3	0.17	0.1	0.08	0.36	0.49	0.3	0.24	0.38	0.49	0.24	0.3	1.26	0.93	0.95	3.28	3.71	2.8	2.46	1.72	3.43	1.32	3.12	2.65	1.19	0.89	0	1.6	1.46	0.59	0.95	0	2.45	1.56	0.36	0	0.19	0.28	1.76
17988	Ndrg1	1.79	5.6	1.08	3.12849	2	Cluster Enriched	1.58e-07	0.39	0.43	1.63	0.74	1.5	0.9	0.98	3.58	2.09	1.6	1.25	2.16	1.2	0.97	7.42	3.65	4.73	9.84	7.03	7.21	9.62	4.03	5.81	3.7	4.28	4.31	2.96	4.16	1.55	0.96	2.2	1.95	1.8	0.42	0.39	0.54	0.17	0.2	0.37	0.24	0.89
53322	Nucb2	0.12	0.7	0.24	2.91667	2	Cluster Enriched	0.00789952	0.02	0.03	0.31	0	0	0	0.08	0.19	0.13	0.41	0.34	0.06	0	0.02	0.17	0.68	0.33	0.18	0.76	0.35	0.1	0.28	0.81	0.38	2.66	1.55	0.31	1.1	0.04	0.48	0.78	0.81	0.26	0.06	0.06	0.14	0.05	0.06	0.05	0	0
380924	Olfm4	0.45	1.78	0.04	3.95556	2	Cluster Enriched	0.000307051	0	0	0	0.09	0.11	0.08	0.4	1.97	0.89	0.15	0.21	0.67	0.4	0.26	1.47	0.37	2.36	3.56	3.26	5.66	3.32	0.21	1.09	0.45	0.66	0.19	0.21	0.16	0.12	0.36	0	0	0	0	0	0	0	0	0	0	0
11520	Plin2	0.2	6.71	2.68	2.50373	2	Cluster Enriched	0.00483516	0.14	0.02	0.37	0.06	0.08	0.15	0.06	0.16	0.23	0.82	0.12	0.17	0.22	0.12	0.23	0.06	0.17	0.24	0.49	1.37	0.82	7.22	7.3	24.79	17.93	8.82	11.27	8.96	5.06	4.85	5.12	2.19	5.39	0.23	0.59	0.7	0.1	3.78	0.11	0.64	0.85
11891	Rab27a	0.07	0.23	0	3.28571	2	Cluster Enriched	0.00200151	0.07	0.17	0	0	0	0	0.05	0.14	0.11	0	0	0	0.16	0.16	0.18	0	0.66	0.16	0	0	0	0.33	0.14	0.51	0.8	0	0.17	0	0	0	0	0	0	0	0	0	0	0	0	0	0
19662	Rbp4	0.76	4.38	1.54	2.84416	2	Cluster Enriched	6.21e-05	0.79	0.84	0.46	1.74	0.78	0.87	0.51	0.38	1.24	0.53	0.83	0.42	0.62	0.25	1.12	0.32	0.9	1.83	3.86	3	2.76	3.53	9.21	7.71	7.49	2.62	9.34	2.24	0.64	3.55	2.78	4.28	1.67	0.97	0.62	1.45	2.7	0.99	1.44	0.56	0.63
52428	Rhpn2	0.03	0.32	0.04	8	2	Cluster Enriched	0.00521461	0	0	0	0	0	0	0	0.06	0.01	0	0.15	0.29	0	0	0	0.14	0	0.09	0.57	0.57	0	0.11	0	0.03	0.87	1.26	0.22	0	0.01	0.32	0	0	0	0	0.01	0.35	0	0	0	0	0
73723	Sh3bgrl3	1.33	4.04	1.35	2.99259	2	Cluster Enriched	0.0335546	0	0	0	0.97	0.89	1.88	1.4	2.55	3.26	0	1.59	2.52	0.65	1.14	3.05	0.7	0.73	3.21	2.44	14.18	2.73	0.81	13.28	3.43	1.96	2.84	2.12	0	3.35	4.87	0	2.77	3.57	1.69	1.74	4.97	0	0	0	0	0
54353	Skap2	0.06	0.13	0.06	2.16667	2	Cluster Enriched	0.0875424	0.15	0	0.08	0	0	0	0	0.13	0.14	0.09	0	0.07	0.02	0	0.22	0.1	0.02	0.21	0.13	0.19	0.17	0.03	0.08	0.13	0.28	0.07	0.11	0.17	0.14	0.24	0.13	0.19	0.19	0	0	0	0	0	0	0	0
83704	Slc12a9	0	0.02	0	Inf	2	Cluster Enriched	0.0246749	0	0	0	0	0.01	0.01	0.01	0.01	0.01	0	0	0	0	0	0	0.01	0	0.09	0	0	0	0	0	0	0	0.1	0.07	0	0	0	0	0	0	0	0	0	0	0	0	0	0
64075	Smoc1	0	0.01	0	Inf	2	Cluster Enriched	0.0225369	0	0	0	0	0	0	0	0	0	0	0	0	0	0	0	0	0.04	0.01	0.01	0.02	0	0	0	0	0	0	0	0	0	0	0	0	0	0	0	0	0	0	0	0	0
20661	Sort1	0.07	0.16	0	2.28571	2	Cluster Enriched	0.00298472	0.11	0	0.19	0.02	0.06	0.04	0	0.11	0.08	0	0.1	0.08	0.12	0	0.09	0.17	0.12	0.05	0.24	0.73	0.05	0	0.12	0.05	0.21	0.11	0.02	0	0	0	0	0	0	0	0	0	0	0	0	0	0
21804	Tgfb1i1	0	0.04	0.01	4	2	Cluster Enriched	0.00530841	0.01	0	0.02	0	0	0	0	0	0	0	0	0	0.02	0	0.02	0	0.02	0.03	0.03	0.04	0.13	0	0.04	0.04	0.05	0.06	0.04	0.09	0	0.03	0.08	0	0.03	0	0	0	0	0	0	0	0
76654	Upp2	0	0.22	0.04	5.5	2	Cluster Enriched	0.299555	0	0	0	0	0	0	0	0	0	0	0	0	0	0	0	0	0	0	0	0	0	0.26	2.41	0	0	0	0	0	0	0	0	0	0	0.21	0.1	0	0	0	0	0.35	0.08
71775	1300017J02Rik	0.06	0.29	0.94	3.24138	3	Cluster Enriched	4.06e-07	0.02	0.01	0.01	0.02	0.02	0.02	0.04	0.08	0.06	0.03	0.04	0.18	0.03	0.05	0.23	0.64	0.08	0.29	0.36	0.35	0.35	0.08	0.16	0.35	0.31	0.26	0.29	0.42	0.4	1.4	1.07	1.92	0.34	1.86	0.58	1.65	0.56	0.96	1.78	0.67	0.51
69662	2310061I04Rik	0	0	0.03	Inf	3	Cluster Enriched	0.0740979	0	0	0	0	0	0	0	0	0	0	0	0	0	0	0	0	0	0	0	0	0	0	0	0	0	0	0	0	0	0	0.14	0.01	0.06	0	0	0	0	0	0	0	0
23923	Aadat	0.04	0.69	5.02	7.27536	3	Cluster Enriched	7.89e-13	0	0	0	0	0	0	0.04	0.09	0.17	0.09	0.08	0	0.03	0	0.13	0.07	0	0.44	0.24	0.18	0.19	0.51	0.8	0.59	2.29	1.58	1.44	3.25	3.57	2.84	6.7	4.32	4.97	7.42	10.02	6.43	6.16	5.62	5.43	1.91	4.92
30956	Aass	0.65	5.5	12.95	2.35455	3	Cluster Enriched	3.8e-08	0.16	0.35	0.12	0.36	0.42	0.31	0.96	0.9	0.78	0.64	0.95	0.93	0.58	0.94	1.28	0.89	1.3	2.66	2.96	3.06	1.71	4.78	8.44	4.45	18.25	10.85	6.67	5.14	9.69	7.86	19.71	12.06	4.71	21.94	21.34	5.12	16.36	10.1	8.77	15.35	20.71
27413	Abcb11	0.03	1.25	3.35	2.68	3	Cluster Enriched	3.88e-14	0	0	0	0	0	0	0	0.15	0.18	0	0.01	0.05	0.01	0.02	0.04	0.01	0.04	0.62	0.67	0.99	0.28	1.15	1.7	1.35	2.28	2.94	2.94	3.36	2.37	2.57	3.76	4.44	3.75	3.04	2.2	3.46	4.4	3.58	3.52	2.64	3.99
18671	Abcb1a	0	0.03	0.09	3	3	Cluster Enriched	0.367738	0	0	0	0	0	0	0	0	0	0	0	0	0	0	0	0	0	0	0	0	0	0	0.03	0.13	0	0.15	0.04	0	0	0	1.2	0.24	0.09	0.05	0.01	0.1	0	0	0	0	0
18670	Abcb4	0.03	0.21	0.74	3.52381	3	Cluster Enriched	0.00945796	0	0	0	0	0	0	0.02	0.01	0.02	0.01	0	0.07	0.01	0.01	0.24	0.01	0.01	0.04	0.06	0.19	0.08	0.11	0.33	0.25	0.43	0.48	0.53	0.78	0.47	0.59	0.85	3.86	0.65	0.61	0.33	2.45	0.2	0.27	0.31	0.21	0.19
76408	Abcc3	0	0	0.09	Inf	3	Cluster Enriched	0.000233323	0	0	0	0	0	0	0	0.01	0.01	0	0	0	0	0	0	0	0	0	0	0	0	0	0	0	0	0	0	0.01	0.01	0	0.07	0.04	0.05	0.14	0	0.02	0.03	0.25	0.06	0.08	0.03
27421	Abcc6	0.01	0.13	0.74	5.69231	3	Cluster Enriched	9.98e-10	0	0	0	0	0	0	0	0.03	0.02	0.01	0.04	0.02	0	0.03	0.03	0.06	0.01	0.11	0.05	0.19	0.05	0.02	0.31	0.11	0.31	0.15	0.2	0.26	0.45	0.54	0.62	0.64	0.55	1.62	1.11	1.41	0.84	0.94	0.92	1.03	0.52
26357	Abcg2	0.43	0.2	1.16	2.69767	3	Cluster Enriched	0.00859375	0.35	0.42	0.22	0.67	0.24	0.34	0.36	0.53	0.4	0.61	0.34	0.77	0.28	0.47	0.4	0.2	0.28	0.2	0.17	0.33	0.17	0.12	0.28	0.09	0.28	0.06	0.16	0.41	1.09	0.29	0.39	0.41	3.38	0.17	0.29	0.25	0.12	1.75	0.59	3.21	0.09
27409	Abcg5	0	0	0.23	Inf	3	Cluster Enriched	0.00380307	0	0	0	0	0	0	0	0	0	0	0	0	0	0	0	0	0	0	0	0	0	0	0	0	0	0	0	0	0.14	0.06	0.26	0.13	0.34	0.76	1.15	0.54	0.22	0.25	0.11	0	0
67470	Abcg8	0	0.02	0.33	16.5	3	Cluster Enriched	9.27e-05	0	0	0	0	0	0	0	0	0	0	0	0	0	0	0	0	0	0	0	0	0	0.03	0.05	0.01	0.05	0.04	0.03	0.31	0.17	0.24	0.3	0.57	0.44	1.29	0.85	0.41	0.29	0.11	0.3	0.14	0.15
76491	Abhd14b	2.06	11.09	49.11	4.42831	3	Cluster Enriched	2.94e-12	0.69	0.63	0.52	1.19	0.67	0.9	2.03	3.84	2.6	1.99	2.64	3.57	3.29	1.44	4.83	4	5.1	9.73	8.48	6.66	10.3	7.85	12.31	10.62	20.71	25.12	12.17	23.52	19.95	25.99	49.03	38.02	21.49	39.32	50.17	51.2	50.72	77.33	66.48	77.36	65.92
54608	Abhd2	0	0.06	0.2	3.33333	3	Cluster Enriched	0.00675966	0	0	0	0	0	0	0	0	0	0	0	0	0	0	0	0	0	0	0	0	0	0.04	0	0.07	0.29	0.13	0.16	0.57	0.36	0.62	0.37	0.43	0.68	0.09	0.02	0.23	0.03	0.19	0	0	0
105501	Abhd4	0	0	0.03	Inf	3	Cluster Enriched	0.0974247	0	0	0	0	0	0	0	0	0	0	0	0	0	0	0	0	0	0	0	0	0	0	0	0	0	0	0	0	0	0	0	0	0	0	0	0	0	0	0	0.11	0
52538	Acaa2	17.74	227.28	850.01	3.73992	3	Cluster Enriched	8.99e-15	5.72	3.82	8.34	7.15	6.77	5.19	9.5	29.19	24.53	22.36	18.98	32.98	16.79	11.54	63.2	37.21	37.35	197.22	155.84	147.03	120.27	181.45	202.89	268.13	455.12	394.46	530.38	566.59	619.23	817.47	918.23	562.65	884.81	1359.41	1311.31	1224.57	930.69	883.04	784.42	850.12	618.97
100705	Acacb	0	0.04	0.18	4.5	3	Cluster Enriched	0.00342151	0	0	0	0	0	0	0	0	0	0	0	0	0	0	0	0	0	0	0.04	0.06	0.05	0.04	0.1	0.03	0.08	0.06	0.06	0	0	0	0	0	0	0	0	0	0.04	0.23	0.4	0.24	0.52
338350	Acad12	0	0.06	0.74	12.3333	3	Cluster Enriched	1.44e-09	0	0	0	0	0	0	0	0	0	0	0.01	0.04	0	0	0	0	0.03	0.08	0	0.07	0.05	0	0	0	0	0.3	0.17	0.3	0.39	0.27	0	1.03	0.66	1.26	1.43	1.15	0.82	1.07	0.71	0.6	0.77
209186	Acnat2	0	0.03	0.54	18	3	Cluster Enriched	7.97e-06	0	0	0	0	0	0	0	0	0	0	0	0	0	0	0	0	0	0	0	0	0	0	0	0	0	0.27	0.13	0.47	0.31	0.84	1.57	0.35	0.8	0.7	0.83	1.13	0.95	0.75	0.59	0	0.19
74156	Acot12	0	0.38	2.07	5.44737	3	Cluster Enriched	7.05e-11	0	0	0	0	0	0	0	0	0	0	0	0	0	0	0	0	0	0	0.32	0.21	0.09	0.28	0.64	0.28	1.07	1	0.72	1.31	1.27	1.54	4.72	1.93	2.3	2.44	2.29	2.92	2.32	2.95	2.74	2	1.39
66834	Acot13	0.28	2.33	12.02	5.1588	3	Cluster Enriched	2.36e-11	0	0	0	0	0	0	0	0.75	0.73	1.06	0.84	0.8	0	0	0	0.97	0.92	1.84	0	1.5	1.39	0.47	0	2.3	7.11	8.52	2.93	10.62	5.95	5.08	7.95	5.74	6.58	12.8	12.63	13.79	16.49	18.4	14.8	19.38	17.67
93732	Acox2	0.27	1.98	6.57	3.31818	3	Cluster Enriched	5.95e-12	0	0	0	0	0	0	0.11	0.52	0.3	0.21	0.74	0.66	0.38	0.56	0.56	0.66	0.53	1.45	1.88	3.38	2.1	2	1.7	1.25	3.06	2.96	2.81	3.55	3.71	5.71	5.65	5.76	6.7	6.85	7.89	11.31	7.78	12.02	9.06	6.75	3.7
11431	Acp1	0	0	0.57	Inf	3	Cluster Enriched	0.267172	0	0	0	0	0	0	0	0	0	0	0	0	0	0	0	0	0	0	0	0	0	0	0	0	0	0	0	0	0	0	0	0	0	0	0	0	0	5.05	5.23	0	0
433256	Acsl5	0.94	12.83	26.78	2.0873	3	Cluster Enriched	1.36e-12	0.28	0.24	0.16	0.6	0.38	0.21	0.9	0.97	0.97	1.14	1.42	1.67	0.96	1.09	3.1	2.74	3.2	7.15	9.26	12.26	7.66	10.85	10.55	12.17	26.93	21.98	29.26	19.75	27.75	40.11	29.82	30.83	31.35	25.95	21.77	30.49	14.61	28.72	33.97	36.43	24.17
117147	Acsm1	0.07	6.59	55.21	8.37785	3	Cluster Enriched	2.48e-10	0	0	0	0	0	0	0	0.42	0.08	0.05	0.08	0.46	0	0	0	0.07	0.13	4.87	5.15	1.89	4.98	2.14	3.33	6.49	10.34	27.5	12.18	16.18	54.37	69.14	25.31	113.79	15.86	92.33	90.41	31.61	73.34	45.9	38.4	50.36	69.99
272428	Acsm5	0	0	2.54	Inf	3	Cluster Enriched	1.42e-06	0	0	0	0	0	0	0	0	0	0	0	0	0	0	0	0	0	0	0	0	0	0	0	0	0	0	0	0.1	0.07	0.19	0.37	0.55	0.63	1.8	1.86	2.11	3.36	3.73	4.34	5.93	2.98
71670	Acy3	0.12	0.4	3.89	9.725	3	Cluster Enriched	1.24e-09	0.06	0	0.03	0.09	0.08	0.03	0.06	0.18	0.15	0.13	0.12	0.22	0.28	0.12	0.24	0.28	0.23	0.1	0.29	0.32	0.23	0.39	0.53	0.29	0.74	0.93	0.48	1.28	1.1	1.41	2.15	2.63	1.06	4.38	3.4	4.61	7.57	6.15	4.44	3.73	7.07
11522	Adh1	1.03	66.45	704.03	10.5949	3	Cluster Enriched	1.41e-06	0	0	0	0	0	0	0	1.59	0.76	0.22	0.43	1.5	0.17	0.14	10.63	1.87	3.59	92.74	52.76	88.82	82.02	67.55	53.34	60.56	85.23	95.63	113.32	62.65	113.62	160.69	193.31	128.59	134.65	269.25	383.98	689.12	1082.5	1557.79	1345.04	1037.36	1339.57
26876	Adh4	0	0	0.48	Inf	3	Cluster Enriched	0.0507528	0	0	0	0	0	0	0	0	0	0	0	0	0	0	0	0	0	0	0	0	0	0	0	0	0	0	0	0	0	0	0	0	0	0	0	0	0	0.22	0.07	0.4	0.79
11534	Adk	7.45	39	129.33	3.31615	3	Cluster Enriched	1.82e-09	2.72	4.97	6.19	4.82	4.54	5.85	5.19	8.05	9.52	6.49	7.92	12.58	10.14	4.7	18.12	8.94	10.99	31.87	27.78	25.23	32.6	23.14	54.86	36.75	111.25	58.85	45.76	63.05	60.7	62.87	116.2	72.3	66.98	124.34	95.12	122.26	194.08	265.18	210.26	172.15	188.68
280662	Afm	0	0	0.11	Inf	3	Cluster Enriched	0.00661726	0	0	0	0	0	0	0	0	0	0	0	0	0	0	0	0	0	0	0	0	0	0	0	0	0	0	0	0	0	0	0.15	0.03	0.07	0.06	0.12	0.12	0.05	0.03	0.06	0.05	0.19
71562	Afmid	0.01	0.28	3.02	10.7857	3	Cluster Enriched	1.97e-07	0	0	0	0	0	0	0	0.02	0.03	0	0.03	0.1	0	0	0	0	0	0	0.12	0.3	0	0.11	0.32	0.39	0.57	0.72	0.77	0.82	1.42	0.89	3.11	2.4	1.09	3.56	6.28	3.06	6.66	2.28	4.99	4.77	1.59
75986	Agmat	0.04	1.01	6.51	6.44554	3	Cluster Enriched	1.97e-09	0	0	0	0	0	0	0	0.09	0.11	0	0	0	0.09	0.05	0.22	0.18	0	0.54	0.5	0	0.22	0.49	0.74	1.74	2.96	2.39	2.37	3.17	4.5	2.44	5	2.89	4.64	10.22	13.82	5.37	9.39	5.52	5.32	7.5	8.43
319660	Agmo	0	0.19	0.63	3.31579	3	Cluster Enriched	8.34e-06	0	0	0	0	0	0	0	0	0	0	0	0	0	0	0	0	0	0	0	0	0	0	0.31	0.4	0.16	0.39	1.03	0.48	0.16	0.79	1.77	0.51	0.82	1.02	0.55	0	0.35	0.95	0.57	0.7	0.18
67512	Agpat2	0.04	0.59	3.46	5.86441	3	Cluster Enriched	3e-08	0	0	0	0	0	0	0.1	0.06	0.05	0	0.14	0.04	0.04	0	0.1	0.08	0.28	0.13	0.79	0.72	0	0.54	0.85	0.43	1.24	1.05	0.99	1.61	1.12	5.4	1.87	7.11	2.5	2.61	1.63	5.42	4.42	7.64	5.83	3.56	2.78
28169	Agpat3	0.06	1.22	2.91	2.38525	3	Cluster Enriched	0.000166426	0	0	0	0	0	0	0	0.26	0.1	0.15	0.08	0.01	0.1	0	0.16	0.26	0.28	0.5	0.73	0.7	0.33	0.52	1.14	1.21	3.06	2.56	3.37	3.56	6.14	5.01	3.84	7.94	5.02	2.24	2.13	7.25	1.21	1.28	1.17	0.97	1.05
11611	Agxt	0.09	7.07	46.69	6.60396	3	Cluster Enriched	6e-07	0	0	0	0	0	0	0	0.28	0.03	0.04	0.04	0.05	0.02	0.02	0.83	0.02	0.18	1.86	1.09	2.35	0.7	2.94	5.74	3.51	25.41	21.13	19.96	36.67	31.68	40.56	47.7	43.27	35.39	144.25	94.36	55.59	64.86	62.42	44.41	43.65	29.31
268782	Agxt2	0.2	1.88	13.35	7.10106	3	Cluster Enriched	1.12e-15	0	0	0	0	0	0	0.17	0.37	0.25	0.31	0.35	0.21	0.41	0.2	0.79	0.59	0.39	2.11	1.38	1.57	0.9	1.14	2.74	1.76	3.6	3.84	2.58	7.22	9.44	9.28	13.23	11.07	11.16	21.32	23.5	14.68	15.79	15.91	12.67	13.62	13.35
74340	Ahcyl2	0.48	0.96	4.08	4.25	3	Cluster Enriched	1.57e-07	0.33	0	0.62	0.6	0.56	0.44	0.51	0.69	0.56	0.5	0.43	0.57	0.36	0.36	0.62	0	0.59	1.62	1.29	1.25	0	1.34	3.19	2.27	0	0	0	3.75	1.62	0	5.08	3.21	2.29	0	2.93	3.69	5.65	4.27	5.54	6.42	7.35
105387	Akr1c14	0.06	2.31	26.27	11.3723	3	Cluster Enriched	1e-12	0	0	0	0	0	0	0	0.04	0.04	0	0.02	0.23	0.01	0	0.63	0.3	0.39	1.79	1.35	2.7	1.58	1.76	2.19	1.97	3.65	5.07	4.91	11.54	12.37	11.38	15.87	20.45	16.4	28.07	23.62	34.13	22.67	41.57	33.95	35.64	25.65
432720	Akr1c19	1.42	4.82	12.64	2.62241	3	Cluster Enriched	4.76e-05	0.44	0.7	0.78	1.37	0.48	0.92	1.43	1.34	1.82	1.85	2.14	1.26	2.07	1.58	3.16	1.82	3	5.26	8.33	4.79	2.59	3.43	4.03	2.82	8.5	5.77	7.44	7.87	3.97	3.16	6.39	4.73	4.54	5.01	8.18	2.52	14.32	12	17.91	24.55	15.44
116852	Akr1c20	0	0.34	39.66	116.647	3	Cluster Enriched	1.71e-09	0	0	0	0	0	0	0	0	0	0	0	0	0	0	0	0	0	0	0	0	0	0	0	0	0.64	2.33	1.17	8.75	14.34	17.99	19.73	12.62	15.04	45.2	53.11	54.27	55.5	94.96	66.47	50.55	53.03
83702	Akr1c6	0.01	2.24	188.03	83.942	3	Cluster Enriched	3.87e-09	0	0	0	0	0	0	0	0.03	0.02	0.02	0.03	0.04	0	0	0	0.04	0.05	1.66	1.31	0.81	0.89	0.73	2.88	2.83	3.01	7	5.66	31.81	38.39	65.52	85.4	85.35	62.21	200.93	262.96	286.99	230.69	430.73	344.84	168.26	218.78
208665	Akr1d1	0.16	5.87	42.33	7.21124	3	Cluster Enriched	4.76e-10	0	0	0	0	0	0	0	0.24	0.15	0.16	0.07	0.31	0.07	0	1.36	0.37	0.7	2.72	3.99	3.97	2.4	5.13	4.8	4.76	12.39	20.74	8.47	18.66	18.75	21.1	40.47	30.26	28.79	84.8	55.97	57.69	59.14	75.19	68.27	27.6	56.53
110198	Akr7a5	1.08	4.44	15.97	3.59685	3	Cluster Enriched	7.44e-11	0.69	0.31	1.27	0.86	0.83	1.25	0.35	1.3	1.34	1	0.82	1.44	1.11	1.32	2.25	1.96	1.79	3.45	4.43	3.58	3.33	3.62	3.95	2.99	11.72	6.57	5.93	7.74	12.43	9.35	12.89	7.16	8.74	13.63	12.94	17.47	13.78	18.08	14.71	28.64	18.51
11657	Alb	49.45	227.34	679.99	2.99107	3	Cluster Enriched	1.14e-11	10.36	10.78	12.47	13.73	25.51	8.69	15.81	67.67	65.33	61.79	39	111.83	13.23	11.11	274.5	98.18	158.71	450.2	256.14	216.24	232.08	352.35	385.42	205.78	99.76	110.68	162.51	441.8	184	560.38	646.08	482.1	493.37	903.79	463.93	467.22	815.08	947.43	860.6	929.24	755.42
26358	Aldh1a7	0.08	1.24	27.02	21.7903	3	Cluster Enriched	0.000753465	0	0	0	0	0	0	0	0.14	0.12	0	0	0	0.61	0	0.36	0	0	0	1.63	0	0.39	2.97	0.78	0.45	5.05	2.71	0.88	0	2.5	0.78	4.76	3.55	1.03	5.71	4.2	3.62	22.36	15.55	14.74	68.55	68.09
107747	Aldh1l1	1.22	12.86	113.13	8.79705	3	Cluster Enriched	4.69e-08	0.08	0.1	0.22	0.25	0.4	0.22	0.95	2.33	1.7	1.39	1.21	2.69	1.21	0.97	4.52	2.79	3.07	9.87	8.46	9.51	8.98	9.77	20.92	11.88	27.06	25.01	17.05	23.94	33.4	39.28	58.86	47.23	36.46	70.78	62.92	69.41	139.11	204.63	199.5	173.88	201.26
11671	Aldh3a2	0.56	4.14	13.7	3.30918	3	Cluster Enriched	9.46e-12	0.18	0.32	0.12	0.31	0.28	0.11	0.44	1.2	0.73	0.6	0.56	0.9	0.65	0.6	1.39	1.43	1.09	2.56	2.78	3.67	1.92	3.42	2.92	3.07	8.76	11.09	7.02	12.15	9.95	12.41	9.71	14.86	21.97	21.17	21.56	16.56	11.8	12.65	12.7	6.34	19.4
212647	Aldh4a1	4.35	18.75	108.39	5.7808	3	Cluster Enriched	6.47e-10	1.36	2.01	1.61	2.21	2.04	2.66	3.08	7.66	5.26	4.93	5.08	6.56	5.48	4.15	11.15	7.86	8.52	18.27	11.56	10.7	17.45	16.62	17.8	16.37	29.22	34	36.67	32.37	48.25	69.59	60.91	70.57	92.39	192.05	165.28	173.28	134.28	203.28	172.86	88.78	116.43
214579	Aldh5a1	0.35	2.26	6.95	3.07522	3	Cluster Enriched	1.95e-10	0.11	0.13	0.21	0.23	0.23	0.14	0.28	0.47	0.32	0.43	0.51	0.51	0.5	0.23	1.01	0.53	0.79	1.72	1.32	2	1.41	1.82	3.22	1.21	6.92	4.24	1.94	4.03	3.2	3.93	6.2	5.16	2.69	9.41	6.06	7.59	10.46	9.07	7	8.99	13.71
110695	Aldh7a1	2.81	15.53	54.16	3.48744	3	Cluster Enriched	2.01e-09	1.29	0.93	1.95	1.81	1.55	1.28	1.5	3.98	3.55	3.51	3.3	3.51	2.81	2.12	9.03	4.53	6.28	16.94	12.6	13.8	7.7	15.6	15.17	11.39	30.7	29.25	22.43	20.25	25.01	21.43	38.06	31.65	27.6	59.02	47.35	36.7	67.51	52.26	49.32	73.89	74.14
237320	Aldh8a1	0.5	6.77	31.81	4.69867	3	Cluster Enriched	6.86e-13	0.01	0.06	0.11	0.05	0.18	0.18	0.27	0.89	0.91	0.56	0.56	0.88	0.58	0.42	1.89	1.13	1.22	3.84	8.19	5.1	2.42	4.24	7.6	5.98	13.64	15.71	12.21	13.36	14.56	20.57	21.11	20.45	21.9	31.81	37.78	46.38	35.16	50.44	51.82	40.78	30.94
71761	Amdhd1	0.43	6.43	40.45	6.29082	3	Cluster Enriched	9.02e-10	0.02	0.06	0.03	0.15	0.18	0.12	0.17	0.8	0.8	0.38	0.43	1.15	0.45	0.26	1.42	1.09	1.14	5.72	3.46	3.36	2.73	2.64	3.94	9.06	16.64	13.9	13.46	10.88	12.07	20.31	30.72	28.66	29.25	67.46	55.86	60.41	51.04	90.32	56.5	37.21	45.45
11761	Aox1	0	0	0.28	Inf	3	Cluster Enriched	0.0374771	0	0	0	0	0	0	0	0	0	0	0	0	0	0	0	0	0	0	0	0	0	0	0	0	0	0	0	0	0	0	0	0	0	0	0	0	0.08	0.06	0.09	0.64	0.17
11807	Apoa2	0	0.45	4.48	9.95556	3	Cluster Enriched	0.00603595	0	0	0	0	0	0	0	0	0	0	0	0	0	0	0	0	0	0	0	0	0	0	0	0	1.37	0	4.01	0	0	0	9.5	0	9.05	13.45	11.16	0	0	0	0	0	0
11812	Apoc1	0	0.47	9.9	21.0638	3	Cluster Enriched	2.48e-07	0	0	0	0	0	0	0	0	0	0	0	0	0	0	0	0	0	0	0	0	0	0	0	0	3.07	2.58	0	16.8	2.38	4.29	0	6.61	6.88	16.99	27.77	8.22	15.45	8.1	5.81	7.64	18.32
11814	Apoc3	0	0.05	4.73	94.6	3	Cluster Enriched	0.000588457	0	0	0	0	0	0	0	0	0	0	0	0	0	0	0	0	0	0	0.25	0.34	0	0	0	0	0	0	0	2.38	11.31	0.88	3.94	1.14	1.19	0	0	0	14.85	6.65	3.63	2.17	5.08
103161	Apof	0	0.01	0.03	3	3	Cluster Enriched	0.133299	0	0	0	0	0	0	0	0	0	0	0	0	0	0	0	0	0	0	0	0	0	0.06	0	0.04	0	0	0	0	0	0	0	0.09	0.11	0.16	0	0.13	0	0	0	0	0
11846	Arg1	1.89	108.7	404.1	3.71757	3	Cluster Enriched	6.81e-07	0.05	0.04	0.03	0	0.12	0.07	0.33	5.04	1.6	2.22	1.29	3.16	1.04	0.95	12.37	4.12	6.4	41.91	46.46	35.8	30.69	60.93	208.84	133.06	388.79	166.58	180.86	128.8	100.02	110.6	770.74	142.13	107.31	218.56	212.99	209.13	652.86	579.85	666.45	897.75	416.32
71544	Arhgap42	0	0	0.03	Inf	3	Cluster Enriched	0.148714	0	0	0	0	0	0	0	0	0	0	0	0	0	0	0	0	0	0	0	0	0	0	0	0	0	0	0	0	0	0	0	0	0	0	0	0	0	0	0	0	0
11889	Asgr1	0	3.73	12.35	3.31099	3	Cluster Enriched	9.35e-13	0	0	0	0	0	0	0	0	0	0	0	0	0	0	0	0	0	0	1.78	2.26	0.58	2.5	2.94	2.73	13.14	9.79	9.06	14.17	8.89	15.8	17.84	12.02	12.05	12.53	11.1	15.98	7.44	14.95	14.57	11.07	11.3
11890	Asgr2	0	0.44	3.81	8.65909	3	Cluster Enriched	1.19e-13	0	0	0	0	0	0	0	0	0	0	0	0	0	0	0	0	0	0	0	0	0	0	0	0	0.82	2.55	1.91	2.37	2	4.57	3.06	5.21	3.57	4.85	4.86	3.61	5.62	5.92	4.15	1.18	3.19
109900	Asl	2.42	33.3	109.1	3.27628	3	Cluster Enriched	2.05e-09	0.93	1.07	1.48	1.51	1.73	1.08	1.81	3.65	2.73	3.82	2.63	3.64	2.57	2.72	4.86	4.56	4.1	8.86	15.53	16.14	8.18	23.31	95.93	28.28	80.56	65.29	48.86	58.51	44.73	36.8	131.69	72.23	41.41	86.61	100.48	68.01	140.11	184.76	153.98	170.64	173.15
68352	Aspdh	0.47	2.56	26.5	10.3516	3	Cluster Enriched	2.11e-11	0	0	0	0	0	0	0.03	0.25	0.08	0.28	2.49	0.34	0.2	2.53	0.87	0.57	0.48	1.34	5.11	1.21	1.1	3.23	1.55	5.13	3.45	3.29	4.28	9.7	9.84	17.41	19.94	10.35	16.3	32.06	22.41	30.13	24.04	47.67	38.09	34.27	44.22
104816	Aspg	0	0.05	1.16	23.2	3	Cluster Enriched	7.2e-05	0	0	0	0	0	0	0	0	0	0	0	0	0	0	0	0	0	0	0	0	0	0	0.07	0.08	0.17	0.13	0.1	0	0.04	0.16	0.19	0.12	0.09	0.2	0.13	0.42	1.63	2.62	1.92	2.99	1.64
11898	Ass1	21.2	411.16	1698.05	4.1299	3	Cluster Enriched	7.36e-07	3.25	3.37	4.6	3.87	6.04	2.74	8.78	30.78	15.66	41.02	19.27	40.41	26.32	15.4	96.45	73.68	66.73	254.69	294.02	253.72	163.34	345.31	772.72	471.51	1003.01	720.31	514.92	461.09	350.59	371.84	1412.94	428.08	240.12	1370.81	1042.2	767.75	2499.65	2627.82	2472.35	2899.25	3592.07
329015	Atg2a	0	0	0.01	Inf	3	Cluster Enriched	0.721415	0	0	0	0	0	0	0	0	0	0	0	0	0.01	0.03	0	0	0	0	0.01	0.01	0	0	0	0	0	0	0	0	0	0	0	0	0	0	0	0	0	0	0	0	0
11793	Atg5	0	0.09	0.38	4.22222	3	Cluster Enriched	0.0212441	0	0	0	0	0	0	0	0.05	0.01	0	0	0	0	0	0	0	0	0	0	0	0	0	0.13	0.05	0.15	0.59	0.17	0	0.66	0.66	0.15	1.84	0.12	0.46	1.59	0.78	0.07	0.04	0.06	0	0
320940	Atp11c	0	0	2.06	Inf	3	Cluster Enriched	4.52e-07	0	0	0	0	0	0	0	0	0	0	0	0	0	0	0	0	0	0	0	0	0	0	0	0	0.02	0	0.02	0.07	0.44	0.25	0.57	2.03	0.38	0.72	1.36	1.5	1.34	3.73	2.88	4.17	3.57
11928	Atp1a1	1.81	3.67	7.68	2.09264	3	Cluster Enriched	1.28e-14	1.89	1.68	2.37	1.72	1.5	1.51	1.64	2.09	1.9	1.17	1.7	1.34	2.4	1.89	2.28	2.06	1.71	3.37	3.16	3.98	2.32	2.71	5.25	2.97	7.08	5.82	3.63	5.45	6.58	6.39	7.84	9.34	6.48	10.04	9.1	10.17	7.42	8.59	6.77	8.07	8.18
11931	Atp1b1	0.32	2.43	4.9	2.01646	3	Cluster Enriched	4.82e-14	0	0	0	0.12	0.1	0.1	0.41	0.67	0.24	0.3	0.29	0.59	0.42	0.22	1.29	0.8	0.56	1.54	3.06	3.06	2.9	2.16	3.25	1.71	4.14	3.45	2.58	3	5.02	4.28	4.39	2.96	4.96	5.8	5.5	8.43	4.77	5.32	4.46	5.6	5.91
11946	Atp5a1	39.79	125.78	348.89	2.77381	3	Cluster Enriched	2.81e-12	39.24	43.4	55.65	22.35	40.59	33.11	27.25	40.96	45.16	44.61	32.86	40.02	42.01	30.83	58.78	39.83	41.21	92.58	80.83	64.97	47.18	115.24	123.2	143.21	352.74	188.53	219.87	261.77	213.75	233.21	427.22	271.51	241.78	498.04	403.11	464.97	554.19	432.98	349.56	376.63	316.04
11947	Atp5b	70.62	243.16	594.37	2.44436	3	Cluster Enriched	1.96e-13	69.58	58.33	75.66	55.32	53.14	65.41	55.45	83.16	80.29	85.48	59	68.25	84.45	55.15	110.61	105.36	88.38	182.19	141.49	191.21	119.18	188.83	269.24	240.39	539.14	500.16	352.34	435.61	356.59	428.96	819.48	519.04	449.84	888.87	611.49	685.16	726.2	695.45	617.25	679.92	693.73
71679	Atp5h	12.58	43.67	108.02	2.47355	3	Cluster Enriched	6.26e-12	10.55	8.92	15.86	10.36	12.2	9.76	11.61	19.25	12.7	9.6	12.55	14.12	14.54	7.88	18.81	15.7	19.02	37.42	26.71	20.47	23.64	32.91	37.4	49.17	126.98	66.56	68.02	59.71	53.76	83.52	152.59	62.62	94.5	112.28	105.74	142.69	120.67	139.8	119.44	139.84	100.48
21871	Atp6v0a2	0	0	0.01	Inf	3	Cluster Enriched	0.0376571	0	0	0	0	0	0	0	0	0	0	0.01	0.02	0	0	0	0	0	0	0	0	0	0	0	0	0	0.01	0.02	0	0.03	0.02	0	0.04	0.02	0	0	0	0	0.01	0.01	0.01	0.01
230696	AU022252	0.12	0.6	2.39	3.98333	3	Cluster Enriched	2.43e-12	0	0.09	0.26	0.17	0.06	0.2	0.23	0.15	0.13	0	0	0	0.12	0.07	0.25	0	0.11	0.38	0.22	0.68	0.2	0.46	0.52	0.72	1.55	1.48	0.91	1.8	2.21	1.45	2.01	1.97	1.35	3.03	1.78	2.38	3.75	3.92	1.8	3.7	3.17
12012	Baat	0	0.22	4.65	21.1364	3	Cluster Enriched	3.84e-05	0	0	0	0	0	0	0	0	0	0	0	0	0	0	0	0	0	0	0	0	0	0.09	0	0.15	0.59	0.52	1.3	0.32	0.57	1.04	1.21	1.3	0.85	1.08	0.26	0.84	7.92	7.62	6.48	10.12	6.78
170442	Bbox1	0.09	2.23	6.4	2.86996	3	Cluster Enriched	1.25e-05	0	0	0	0.02	0.01	0	0.07	0.04	0.12	0.41	0.09	0.18	0.08	0.13	0.17	0.2	0.5	0.66	0.48	0.45	0.68	0.8	1.52	2.72	11.95	3.59	3.15	4.54	4.97	3.85	5.88	7.42	5.86	6.29	5.67	7.18	7.67	6.19	6.37	4.88	5.66
12038	Bche	0.36	0.69	1.48	2.14493	3	Cluster Enriched	0.000148847	0.01	0.02	0.12	0.87	0.99	0.07	1.22	0.22	0.14	0.17	0.59	0.27	0.07	0.11	0.48	0.11	0.63	0.73	1.3	0.92	0.33	0.6	1.47	0.58	0.24	0.93	0.49	1.56	0.99	0.95	1.86	1.6	0.89	1.78	2.99	1.54	0.65	3.09	3.55	0.71	0.98
12040	Bckdhb	0.38	4.46	18.49	4.14574	3	Cluster Enriched	1.93e-10	0.09	0	0.1	0.1	0.17	0.41	0.42	0.26	0.13	0.43	0.71	0.32	0.51	0.33	1.7	0.45	0.53	2.89	1.25	2.8	1.22	3.51	5.48	3.33	8.32	13.53	10.17	14.18	9.42	12.27	16.58	25.54	19.86	39.57	24.84	26.49	23	21.98	21.45	12.24	20.71
170752	Bco2	0	0	0.2	Inf	3	Cluster Enriched	0.466405	0	0	0	0	0	0	0	0	0	0	0	0	0	0	0	0	0	0	0	0	0	0	0	0	0	0	0	0	0	0	0	0	0	0	0	0	0	0	0	0	3.35
69772	Bdh2	0	0	0.09	Inf	3	Cluster Enriched	0.136778	0	0	0	0	0	0	0	0	0	0	0	0	0	0	0	0	0	0	0	0	0	0	0	0	0	0	0	0	0	0	0	0	0	0	0	0	0	0	0	0	0
12116	Bhmt	6.64	240.56	1328.82	5.52386	3	Cluster Enriched	1.64e-13	0.46	0.63	1.65	1.57	1.88	1.11	3.71	13.48	9.11	6.25	6.88	16.53	5.13	4.23	27	11.66	17.67	75.45	68.78	66.42	54.27	198.78	300.32	339.18	526.88	708.68	518.68	646.28	1105.75	1308.95	1847.99	977.69	1350.15	1991.14	1773.97	1839.06	1031.8	1341.06	997.81	509.22	2115.98
64918	Bhmt2	0	46.15	239.88	5.19783	3	Cluster Enriched	2.69e-08	0	0	0	0	0	0	0	0	0	0	0	0	0	0	0	0	0	0	0	0	0	0	76.69	69.3	129.8	166.7	111.27	195.77	184.38	320.25	462.69	207.28	255.05	303	458.86	426.1	175.1	230.48	220.34	146.81	0
23827	Bpnt1	0.39	1.58	4.83	3.05696	3	Cluster Enriched	1.38e-09	0.24	0.26	0.35	0.26	0.46	0.28	0.31	0.6	0.52	0.41	0.21	0.56	0.38	0.25	0.73	0.39	0.46	1.53	1.14	1.28	1.01	1.68	1.32	1.24	3.79	3	2.16	1.93	2.21	2.75	4.28	4.39	2.16	4.27	3.97	2.63	5.4	7.45	4.82	8.88	8.67
12262	C1qc	0.01	0	0.08	8	3	Cluster Enriched	0.111511	0	0	0	0	0	0	0	0.1	0.04	0	0	0	0	0	0	0	0	0	0	0	0	0	0	0	0	0	0	0.13	0.14	0.36	0	0.55	0.17	0	0	0	0	0	0	0	0
50909	C1ra	0	0	0.02	Inf	3	Cluster Enriched	0.0152401	0	0	0	0	0	0	0	0	0	0	0	0	0	0	0	0	0	0	0	0	0	0	0	0	0	0	0	0	0	0	0.11	0	0.03	0	0	0	0	0	0	0.06	0.07
12268	C4b	0	0.12	0.35	2.91667	3	Cluster Enriched	6.87e-09	0	0	0	0	0	0	0	0	0	0	0	0	0	0	0	0	0	0	0.15	0.14	0.03	0.05	0.06	0.06	0.33	0.41	0.26	0.24	0.2	0.56	0.24	0.58	0.2	0.2	0.21	0.3	0.38	0.64	0.54	0.46	0.23
12269	C4bp	0	0	0.15	Inf	3	Cluster Enriched	0.000958915	0	0	0	0	0	0	0	0	0	0	0	0	0	0	0	0	0	0	0	0	0	0	0	0	0	0	0	0	0	0	0	0	0	0	0	0	0.15	0.38	0.34	0.18	0.18
12274	C6	0	0	0.03	Inf	3	Cluster Enriched	0.175536	0	0	0	0	0	0	0	0	0	0	0	0	0	0	0	0	0	0	0	0	0	0	0	0	0	0	0	0	0	0	0	0	0	0	0	0	0	0	0	0	0
97130	C77080	0	0	0.01	Inf	3	Cluster Enriched	0.269028	0	0	0	0	0	0	0	0	0	0	0	0	0	0	0	0	0	0	0	0	0	0	0	0	0	0	0	0	0	0	0	0	0	0	0	0	0	0	0	0	0
230558	C8a	0	0	0.09	Inf	3	Cluster Enriched	0.00921797	0	0	0	0	0	0	0	0	0	0	0	0	0	0	0	0	0	0	0	0	0	0	0	0	0	0	0	0	0.04	0.17	0	0	0	0.01	0.01	0.02	0.01	0.05	0.05	0.21	0.01
69379	C8g	0	0	0.37	Inf	3	Cluster Enriched	0.000181432	0	0	0	0	0	0	0	0	0	0	0	0	0	0	0	0	0	0	0	0	0	0	0	0	0	0	0	0	0.21	0.28	0	0	0	0.13	0.22	0.3	0.38	0.4	0.21	1.3	0.23
12279	C9	0	0	0.04	Inf	3	Cluster Enriched	0.135245	0	0	0	0	0	0	0	0	0	0	0	0	0	0	0	0	0	0	0	0	0	0	0	0	0	0	0	0	0	0	0	0	0	0	0	0	0	0	0	0	0
227541	Camk1d	0	0	0.01	Inf	3	Cluster Enriched	0.37624	0	0	0	0	0	0	0	0	0	0	0	0	0	0	0	0	0	0	0.02	0.02	0	0	0	0	0	0	0	0	0	0	0	0.07	0.07	0	0	0	0	0	0	0	0
23831	Car14	0.04	0.1	0.79	7.9	3	Cluster Enriched	0.0374854	0	0	0	0	0	0	0.03	0.17	0.1	0.02	0.11	0.11	0	0	0	0.04	0.02	0.35	0	0	0	0	0.25	0.03	0	0.3	0.21	0	0	0	0.18	0.34	0.04	0.65	0	0.38	0.41	1.03	0.14	5.5	0.54
12352	Car5a	0	0.06	2.19	36.5	3	Cluster Enriched	2.14e-06	0	0	0	0	0	0	0	0	0	0	0	0	0	0	0	0	0	0	0.12	0.11	0	0	0.28	0.05	0.03	0.07	0	0.16	0.36	0.18	1.15	0.14	0.3	1.68	1.51	2.4	4.6	3.39	2.73	3.05	5.76
12319	Car8	0	0.02	0.37	18.5	3	Cluster Enriched	0.00973952	0	0	0	0	0	0	0	0.03	0.04	0	0	0	0	0	0	0	0	0	0.07	0	0.03	0	0	0	0	0.07	0.1	0.1	0.06	0.17	0.27	0	0.4	0.18	0.57	0.37	0.15	0.26	0.47	0.19	0.2
12369	Casp7	0.06	0.14	0.3	2.14286	3	Cluster Enriched	0.181363	0.04	0.02	0.12	0.05	0.09	0.08	0	0.08	0.04	0.07	0.07	0.06	0.08	0.06	0	0	0.07	0.14	0.1	0.37	0.09	0	0.44	0.1	0.02	0.26	0.09	0.14	0.25	0.48	0.13	2.39	0.21	0.24	0.41	0.16	0.16	0.12	0	0.09	0.13
12408	Cbr1	1.44	14.73	41.8	2.83775	3	Cluster Enriched	5.48e-08	0.94	1.18	3.1	0.94	1.46	1.44	1.53	1.39	1.43	1.04	1.09	1.28	0.88	1.05	2.81	1.91	1.39	4.36	6.27	6.7	3.8	10.92	20.38	12.84	47.56	23.75	36.93	30.51	37.76	40.51	94.33	64.38	35.95	57.46	45.1	50.99	56.96	48.28	59.86	39.15	19.23
12411	Cbs	0.93	7.1	15.45	2.17606	3	Cluster Enriched	3.35e-10	0	0	0	0.08	0.21	0.03	0.44	2.26	1.27	1.14	1.38	1.63	1.07	0.43	4.02	2.76	2.21	10.67	6.31	8.07	3.96	5.5	7.85	5.88	11.81	11.27	8.96	7.33	8.79	11.45	18.14	9.39	6.77	14.39	15.65	14.37	29.35	25.48	21.18	22.91	16.09
93671	Cd163	0	0	0.03	Inf	3	Cluster Enriched	0.0880675	0	0	0	0	0	0	0	0	0	0	0	0	0	0	0	0	0	0	0	0	0	0	0	0	0	0	0	0	0	0	0.21	0.24	0.04	0	0	0	0	0	0	0	0
72269	Cda	0	0.08	0.86	10.75	3	Cluster Enriched	7.38e-05	0	0	0	0	0	0	0	0	0	0	0	0	0	0	0	0	0	0	0	0	0	0	0	0	0.07	0.62	0.23	1.3	0.23	1.14	0.66	0	2.08	1.41	0.58	2.43	1.69	1.9	1.04	0.44	0.17
12558	Cdh2	0.04	0.12	0.48	4	3	Cluster Enriched	2.17e-10	0	0.01	0.04	0.08	0.02	0.06	0.04	0.04	0.03	0.05	0.02	0	0.07	0.01	0.11	0	0.07	0.13	0.06	0.07	0.03	0.08	0.19	0.02	0.21	0.44	0.13	0.13	0.25	0.27	0.36	0.59	0.46	0.7	0.41	0.55	0.73	0.82	0.79	0.34	0.38
12583	Cdo1	0	0	0.52	Inf	3	Cluster Enriched	0.00386692	0	0	0	0	0	0	0	0	0	0	0	0	0	0	0	0	0	0	0	0	0	0	0	0	0	0	0	0	0	0	0.25	0	0.13	0	0	0	1.79	2.3	1.2	0	0.82
26365	Ceacam1	0.01	0.11	0.44	4	3	Cluster Enriched	1.75e-08	0	0	0	0	0	0	0	0.1	0.02	0	0	0	0.01	0	0.06	0	0.03	0.11	0.17	0	0.12	0.11	0	0.21	0.16	0.2	0.17	0.22	0	0.25	0.33	0.39	0.24	0.32	0.28	0.57	0.58	0.58	0.86	0.24	0.63
73139	Cenpv	0.51	0.56	1.41	2.51786	3	Cluster Enriched	0.0194478	1.31	0.09	0.32	1.76	0.79	1.44	1.37	0.1	0.12	0.08	0	0.01	0.08	0	0.14	0	1.47	0.3	0	0.29	0.08	0.12	3.46	0.08	0.06	0.19	0.7	0.96	1.43	0.13	3.68	0.7	0.65	0.46	2.86	0.62	0.17	2.88	2.03	0.87	0.72
13884	Ces1c	0	1.1	14.82	13.4727	3	Cluster Enriched	1.61e-12	0	0	0	0	0	0	0	0	0	0	0	0	0	0	0	0	0	0	0.78	1.26	0	0	0.43	1.45	1.7	4.42	3.12	3.39	5.98	12.29	9.53	10.23	11.62	15.21	9.98	22.08	14.58	23.49	20.58	17.17	27.16
104158	Ces1d	0.36	6.88	60.09	8.73401	3	Cluster Enriched	1.53e-12	0	0	0	0	0	0	0.33	0.54	0.19	0.71	0.6	0.69	0.48	0.4	1.5	1.47	0.92	3.85	4.79	7.68	3.13	4.64	3.91	5.76	14.9	18.47	13.04	15.56	26.31	47.39	36.41	41.2	40.95	56.27	52.3	85.52	63.02	99.39	94.31	89.19	79.53
13897	Ces1e	0.01	0.18	2.83	15.7222	3	Cluster Enriched	8.71e-05	0	0	0	0	0	0	0	0	0	0.04	0.03	0	0.01	0	0.01	0.05	0.05	0.05	0.17	0.22	0.05	0.14	0.04	0.1	0.39	0.42	0.53	0.39	0.34	0.4	0.37	0.69	0.48	1.52	1.36	1.51	1.66	4.06	2.62	9.43	4.05
234564	Ces1f	0	0	9.84	Inf	3	Cluster Enriched	0.00560621	0	0	0	0	0	0	0	0	0	0	0	0	0	0	0	0	0	0	0	0	0	0	0	0	0	0	0	0.18	0.29	0.26	0	0	0	0.44	0	1.63	3.15	3.25	2.86	31.71	21.32
12623	Ces1g	0.04	0.83	17.7	21.3253	3	Cluster Enriched	1.18e-07	0	0	0	0	0	0	0	0.03	0.03	0.07	0.13	0.04	0.03	0	0.27	0.34	0.18	0.44	0.65	0.34	0.76	0.37	0	0.93	1.34	2.61	1.96	0.99	3.64	7.45	5.31	7.28	8.1	11.82	7.61	22.06	25.21	36.93	34.51	22.15	39.84
102022	Ces2a	0.34	5.77	23.19	4.01906	3	Cluster Enriched	3.18e-12	0	0	0	0	0	0	0.28	0.7	0.56	0.96	0.31	0.61	0.4	0.24	1.07	0.72	0.95	4.28	5.67	5.96	4.75	2.77	4.17	4.32	16.64	11.96	7.07	21.93	14.29	17.66	22.3	28.02	15.41	23.96	19.28	14.92	28.32	35.51	34.87	37.06	12
234673	Ces2e	0.01	0.67	14.34	21.403	3	Cluster Enriched	4.75e-13	0	0	0	0	0	0	0	0.03	0.05	0	0	0	0	0.03	0.1	0	0.08	0.69	0.55	0.85	0.54	0.37	0.51	0.28	1.2	2.05	0.97	9.69	12.27	12.74	13.33	15.45	17.84	17.55	28.12	25.55	10.22	15.74	17.57	9.87	6.29
218865	Chdh	0.23	3.68	11.77	3.19837	3	Cluster Enriched	6.52e-13	0	0	0	0	0	0	0	0.32	0.25	0.23	0.14	0.73	0.15	0.09	1.57	0.71	0.65	3.67	3.52	3.26	4.22	4.2	2.62	2.89	8.55	5.15	4.78	12.35	10.29	13.38	8.55	12.56	14.2	18.82	20.1	18.35	11.7	10.26	8.13	11.09	11.75
52637	Cisd1	1.44	7.67	43.68	5.69492	3	Cluster Enriched	1.45e-15	1	1.06	0	1.44	1.97	1.76	1.81	1.89	2.39	0.97	1.19	2.16	1.69	1.31	0.92	0.63	1.24	4.59	2.28	3.5	0	5.72	13.49	7.87	18.58	21.81	12.38	35.25	26.74	26.5	49.43	43.26	35.43	69.47	56.36	37.26	54.15	43.55	42.32	53.41	45.34
12739	Cldn3	0	0.07	0.76	10.8571	3	Cluster Enriched	1.67e-06	0	0	0	0	0	0	0	0	0	0	0	0	0	0	0	0	0	0	0	0	0	0	0	0	0	0.51	0.32	0	0.48	0.47	0.27	0.77	0.82	1.43	1.51	1.62	0	1.5	1.02	0.19	1.27
51811	Clec4f	0.03	0.64	1.61	2.51562	3	Cluster Enriched	9.9e-07	0	0	0	0	0	0	0	0.09	0.06	0.02	0	0.3	0	0	0	0.17	0.18	0.85	1.11	0.38	0.31	0.44	0.76	0.76	0.91	1	0.86	2.1	1.21	1.63	1.07	1.38	2.42	1.27	1.18	1.43	1.09	1.64	4.33	0.86	0.48
75863	Clec4g	0	0	0.07	Inf	3	Cluster Enriched	0.0246689	0	0	0	0	0	0	0	0	0	0	0	0	0	0	0	0	0	0	0	0	0	0	0	0	0	0	0	0	0.17	0.36	0	0	0	0	0	0	0.09	0	0.12	0	0.32
94040	Clmn	0	0.04	0.13	3.25	3	Cluster Enriched	0.000540415	0	0	0	0	0	0	0	0	0	0	0	0	0	0	0	0	0	0	0	0	0	0.16	0	0.02	0.27	0	0.03	0.04	0.05	0.06	0.08	0.2	0.04	0.17	0.1	0.08	0.22	0.05	0.13	0.05	0.52
12759	Clu	0.26	0.54	1.29	2.38889	3	Cluster Enriched	1.02e-07	0.22	0.1	0.44	0.29	0.52	0	0.62	0.65	0.19	0.2	0.26	0.06	0.05	0	0.28	0.48	0.35	0.29	0.05	0.51	0.98	0.09	0.78	0.2	0.75	1.28	0.67	0.95	0.71	0.39	0.5	1.14	1.7	1.22	1.12	1.17	1.23	1.99	1.38	1.47	1.84
12763	Cmah	0	0	0.36	Inf	3	Cluster Enriched	2.38e-07	0	0	0	0	0	0	0	0	0	0	0	0	0	0	0	0	0	0	0	0	0	0	0	0	0	0	0	0	0.2	0.39	0	0	0	0.15	0.26	0.38	0.76	0.65	0.71	0.5	0.37
66588	Cmpk1	3.99	6.77	13.89	2.0517	3	Cluster Enriched	1.05e-08	3.46	2.45	6.46	3.57	4.48	3.31	2.64	5.15	5.71	3.35	4.23	3.9	3.62	2.43	5.14	4.34	2.63	7.71	6.3	6.57	6.76	5.13	7.97	8.59	7.78	11.19	6.32	10.27	11.62	7.93	14.42	9.95	8.83	7.46	15.64	16.35	12.12	23.42	15.14	16.96	11.45
67914	Coq9	0.68	2.39	12.32	5.15481	3	Cluster Enriched	1.25e-09	0.11	0	0.26	0.25	6.14	0.33	0.35	0.39	0.17	0.27	0.19	0.57	0	0.29	0.87	0.42	0.76	1.27	0.65	0.49	3.84	1.12	1.41	6.74	2.25	2.91	6.83	1.87	4.82	10.26	4.46	10.87	11.05	20.05	8.99	15.01	20.46	19.58	20.39	8.93	8.8
110323	Cox6b1	18.55	61.6	163.42	2.65292	3	Cluster Enriched	3.67e-11	26.7	21.95	22.97	18.15	15.88	19.5	14.22	16.85	10.55	18.02	12.38	21.12	16.52	17.74	25.75	30.18	15.39	61.08	51.71	41.74	42.14	61.3	48.63	32.88	180.08	98.61	75.46	153.63	92.47	136.1	247.75	121.82	77.51	178.3	209.09	128.68	221.46	193.27	127.69	286.91	154.54
71756	Cpn2	0	0.01	0.16	16	3	Cluster Enriched	0.00161056	0	0	0	0	0	0	0	0	0	0	0	0	0	0	0	0	0	0	0	0	0	0.02	0	0.07	0.02	0	0.02	0	0	0	0	0	0	0	0.09	0.27	0.08	0.52	0.56	0.08	0.45
227231	Cps1	2.1	322.16	1740.29	5.40194	3	Cluster Enriched	4.2e-09	0.07	0.18	0	0.14	0.21	0.06	0.38	2.52	1.89	1.64	1.79	2.78	1.21	0.83	17.77	7.1	9.21	62.95	113.61	130.77	53.39	228.68	498.33	443.94	1011.75	626.08	680.16	511.15	502.23	553.23	1643.37	677.7	464.94	1970.39	1592.32	1218.02	3203.82	2428.03	2203.82	3020.58	2829.6
12905	Cradd	0.01	0.02	0.11	5.5	3	Cluster Enriched	5.42e-05	0.03	0	0.03	0	0	0	0.02	0	0.04	0	0	0	0	0	0	0	0	0	0	0	0	0	0	0	0.11	0	0.08	0.1	0	0.15	0.16	0	0.14	0	0.26	0.13	0	0.18	0.29	0	0.08
12908	Crat	0.06	0.24	0.81	3.375	3	Cluster Enriched	1.68e-06	0.02	0.02	0.05	0.01	0.05	0.06	0.03	0.07	0.08	0.02	0.05	0.08	0.11	0.08	0.12	0	0.05	0.08	0.18	0.18	0.15	0.17	0.12	0.35	0.44	0.55	0.65	1.12	1.49	1.25	1.44	1.28	1.4	1.07	1.38	0.87	0.27	0.24	0.15	0.2	0.11
74114	Crot	0.24	1.89	8.34	4.4127	3	Cluster Enriched	2.62e-06	0.04	0.05	0.13	0.22	0.13	0.13	0.24	0.34	0.63	0.21	0.23	0.34	0.3	0.2	0.48	0.34	0.16	0.58	0.17	0.18	0.19	0.64	0.7	4.02	3.48	5.21	6.98	6.65	8.22	11.38	3.75	14.09	16.64	15.3	9.97	22.63	4.57	7.72	5.29	6.17	5.41
68631	Cryl1	0.01	0.09	0.7	7.77778	3	Cluster Enriched	1.19e-06	0	0	0	0	0	0	0	0	0	0.05	0.05	0.03	0	0	0	0.05	0.07	0.18	0	0.03	0.07	0	0	0	0.19	0.29	0.17	0.59	0.76	0	0.35	0.31	0.45	0.26	0.32	0.06	0.77	0.5	0.7	1.61	0.94
12972	Cryz	1.03	3.65	12.99	3.5589	3	Cluster Enriched	2.79e-16	0.49	0.3	2.47	0.72	0.54	0.37	0.6	1.52	0.76	0.83	0.72	1.79	0.69	0.96	2.73	1.34	1.16	4.99	2.59	2.65	4.23	2.14	4.49	3.63	5.14	6.67	4.73	8.97	7.66	9.12	12.68	11.33	9.68	15.09	10.48	15.14	11.61	18.68	17.23	12.7	15.31
13009	Csrp3	0	0	0.18	Inf	3	Cluster Enriched	0.20976	0	0	0	0	0	0	0	0	0	0	0	0	0	0	0	0	0	0	0	0	0	0	0	0	0	0	0	0	0	0	0	0	0	0	0	0	0	0	0	0	0
107869	Cth	1.32	15.63	44.2	2.8279	3	Cluster Enriched	5.35e-07	0.26	0.29	0.27	0.32	0.81	0.19	0.59	1.76	1.62	1.77	1.47	2.33	1.52	1.06	5.54	4.39	4.29	15.01	10.51	10.65	6.25	12.68	21.56	10.26	43.13	23.37	25.45	27.56	29.37	18.92	41.13	17.5	15.46	53.17	31.54	22.26	59.8	47.03	35.81	87.39	85.16
66445	Cyc1	2.91	7.49	21.2	2.83044	3	Cluster Enriched	2.93e-13	3.1	3.49	2.5	3.17	2.47	2.71	2.54	2.83	2.52	2.72	2.33	2.64	2.14	4.64	3.81	2.53	3.26	4.68	5.62	6.55	4.43	4.56	11.9	7.95	13.64	12.12	12.6	13.51	13.59	24.96	19.23	18.56	23.83	27.22	20.39	36.94	18.66	28.8	20.36	20.13	17.56
13063	Cycs	12.7	31.28	85.76	2.74169	3	Cluster Enriched	4.91e-11	18.24	12.83	25.79	15.15	13.59	9.71	12.49	16.49	13.14	7.47	8.63	7.68	7.23	9.12	13	11.93	7.41	19.52	20.93	19.61	40.9	21.73	33.5	32.66	72.68	36.9	57.62	61.58	48.73	49.69	93.17	58.55	57.82	69.99	59.57	104.33	86.2	126.68	124.37	136.67	67.5
13074	Cyp17a1	0	0	0.1	Inf	3	Cluster Enriched	0.414865	0	0	0	0	0	0	0	0	0	0	0	0	0	0	0	0	0	0	0	0	0	0	0	0	0	0	0	0	0	0	0	0	0	0	0	0	0	0	0	0.15	1.61
13077	Cyp1a2	0	0.09	9.87	109.667	3	Cluster Enriched	9.69e-06	0	0	0	0	0	0	0	0	0	0	0	0	0	0	0	0	0	0	0	0	0	0	0	0	0.08	0.78	0.17	1.05	1.2	1.58	2.14	1.95	1.74	5.16	3.93	8.85	12.59	19.88	26.38	8.39	17.29
104086	Cyp27a1	0	0.32	5.18	16.1875	3	Cluster Enriched	0.000176407	0	0	0	0	0	0	0	0	0	0	0	0	0	0	0	0	0	0	0.09	0.09	0	0.25	0.4	0.4	0.67	0.8	1.17	0.34	0.42	0.26	2.29	0.6	0.47	1.12	0.44	1.23	4.61	5.98	7.27	8.75	10.34
13085	Cyp2a12	0.09	4.34	26.14	6.02304	3	Cluster Enriched	3.2e-11	0	0	0	0	0	0	0.01	0.07	0.02	0.02	0.2	0.03	0.03	0.14	0.9	0.18	1.61	4.51	2.04	3.82	3.27	2.42	5.52	1.17	11.53	10.01	5.97	8.8	18.62	25.27	13.04	31.4	17.96	27.81	36.35	39.49	18.23	47.3	52.62	29.06	20.35
13088	Cyp2b10	0	0	1.68	Inf	3	Cluster Enriched	0.123058	0	0	0	0	0	0	0	0	0	0	0	0	0	0	0	0	0	0	0	0	0	0	0	0	0	0	0	0	0	0	0	0	0	0	3.7	1.49	15.66	1.11	1.74	0	1.31
13094	Cyp2b9	0	0.19	5.25	27.6316	3	Cluster Enriched	2.58e-05	0	0	0	0	0	0	0	0	0	0	0	0	0	0	0	0	0	0	0	0	0	0	0	0	0.33	1.29	0.61	2.31	1.98	3.62	12.51	5.09	5.12	10.81	6.9	6.32	17.61	5.5	5.93	0.06	5.17
13095	Cyp2c29	0	0	14.43	Inf	3	Cluster Enriched	5.31e-05	0	0	0	0	0	0	0	0	0	0	0	0	0	0	0	0	0	0	0	0	0	0	0	0	0	0	0	0	0	0	0.15	0	0.43	5.26	9.71	5.83	21.41	41.91	34.5	18.46	19.24
13096	Cyp2c37	0	0.45	14.43	32.0667	3	Cluster Enriched	3.33e-09	0	0	0	0	0	0	0	0	0	0	0	0	0	0	0	0	0	0	0.02	0.06	0	0.06	0	0.22	0.58	2.06	2.36	2.07	3.77	5.94	10.01	15.85	21.05	8.81	13.38	12.07	13.14	31.54	31.82	8.51	12.96
107141	Cyp2c50	0	0	12.42	Inf	3	Cluster Enriched	1.75e-08	0	0	0	0	0	0	0	0	0	0	0	0	0	0	0	0	0	0	0	0	0	0	0	0	0	0	0	0	0	0	6.73	14.94	15.75	7.85	13.78	9.13	13.06	24.25	23.07	7.85	13.94
404195	Cyp2c54	0	0.14	7.63	54.5	3	Cluster Enriched	4.63e-07	0	0	0	0	0	0	0	0	0	0	0	0	0	0	0	0	0	0	0	0	0	0	0	0	0.14	0.39	1.13	0.62	2.1	3.33	4.31	4.92	8.14	3.36	5.42	0	3.44	12.99	8.81	7.39	12.06
72082	Cyp2c55	0	0.05	0.96	19.2	3	Cluster Enriched	0.000140879	0	0	0	0	0	0	0	0	0	0	0	0	0	0	0	0	0	0	0	0	0	0.03	0	0.02	0.24	0.16	0.13	0.31	0	0.7	0.96	3.66	1.4	1.29	0.1	1.1	0.69	2.65	1.81	0.13	0.49
226105	Cyp2c70	0	1.3	5.69	4.37692	3	Cluster Enriched	1.21e-08	0	0	0	0	0	0	0	0	0	0	0	0	0	0	0	0.04	0.07	2.31	2.75	4.31	1.66	0.8	0.28	0.23	1.08	1.6	0.49	1.6	2.2	1.93	3.41	3.51	1.95	7.92	6.38	7.18	9.36	12.47	9.85	4.65	6.51
13101	Cyp2d10	0.02	1.9	14.22	7.48421	3	Cluster Enriched	2.99e-13	0	0	0	0	0	0	0	0.04	0.08	0	0	0	0.03	0	0.16	0.09	0.16	1.12	2.35	1.52	0.61	0.87	1.86	1.36	3.98	5.56	3.34	11.85	5.96	14.85	10.19	17.5	8.54	10.45	9.53	20.74	12	9.54	8.79	25.38	16.61
76279	Cyp2d26	0.22	10.49	32.05	3.05529	3	Cluster Enriched	1.62e-10	0	0	0	0	0	0	0.01	0.13	0.04	0.06	0.11	0.27	0.04	0.03	2.54	0.76	0.71	6.87	10.44	14.56	4.28	6.72	8.81	7.73	23	25.95	16.05	45.6	34.27	50.13	41.95	55.01	31.64	47.31	33.89	44.56	18.85	28.79	17.93	18.15	37.07
13105	Cyp2d9	0	0.15	5.31	35.4	3	Cluster Enriched	7.71e-05	0	0	0	0	0	0	0	0	0	0	0	0	0	0	0	0	0	0	0	0	0	0.04	0	0.09	0.16	0.49	0.99	1.15	4.82	6.99	1.81	3.56	2.18	1.93	1.42	5.89	2.23	2.15	2.44	16.27	1.64
13106	Cyp2e1	0	12.59	67.56	5.36616	3	Cluster Enriched	6.1e-12	0	0	0	0	0	0	0	0	0	0	0	0	0	0	0	0	0	0	0.35	1.49	0.65	3.18	11.56	10.03	37.78	44.33	41.73	65.12	52.87	67.24	109.21	98.81	84.76	82.77	68.35	119.7	66.26	75.72	74.53	33.09	50.16
13109	Cyp2j5	0	0.16	2.42	15.125	3	Cluster Enriched	4.41e-06	0	0	0	0	0	0	0	0	0	0	0	0	0	0	0	0	0	0	0.05	0.03	0	0.08	0.01	0.04	0.65	0.78	0.3	0.43	0.61	1.24	1.02	0.72	0.69	1.45	0.68	2.37	1.8	2.87	3.03	5.28	2.37
13112	Cyp3a11	0	1	9.44	9.44	3	Cluster Enriched	2.31e-06	0	0	0	0	0	0	0	0	0	0	0	0	0	0	0	0	0	0	0.24	0.13	0	0.71	2.49	2.09	1.76	1.77	2.81	1.74	2.72	3.48	1.8	2.54	2.8	3.48	6.02	7.61	4.68	16.52	13.68	19.47	10.1
337924	Cyp3a44	0	1.03	5.98	5.80583	3	Cluster Enriched	2.16e-06	0	0	0	0	0	0	0	0	0	0	0	0	0	0	0	0	0	0	0.09	0.12	0	0.7	2.03	1.19	3.26	1.95	2.98	2	2.49	3.69	1.35	3.77	2.03	1.89	3.81	4.15	1.71	14.74	7.6	7.87	8.94
277753	Cyp4a12a	0	0	1.55	Inf	3	Cluster Enriched	0.116839	0	0	0	0	0	0	0	0	0	0	0	0	0	0	0	0	0	0	0	0	0	0	0	0	0	0	0	0	0	0	0	0	0	0	0	0	0	0	0	2.55	0
170716	Cyp4f13	0	0.08	0.29	3.625	3	Cluster Enriched	5.97e-09	0	0	0	0	0	0	0	0	0	0	0	0	0	0	0	0.02	0	0.12	0.09	0.13	0.01	0.02	0.03	0.11	0.07	0.09	0.25	0.22	0.25	0.27	0.32	0.16	0.28	0.09	0.14	0.14	0.53	0.35	0.3	0.41	0.25
64385	Cyp4f14	0	0	1.3	Inf	3	Cluster Enriched	0.000475558	0	0	0	0	0	0	0	0	0	0	0	0	0	0	0	0	0	0	0	0	0	0	0	0	0	0	0	0	0	0	0	0	0	0.62	0.46	0.71	5.26	2.73	1.88	2.35	1.46
106648	Cyp4f15	0	0.04	0.74	18.5	3	Cluster Enriched	3.64e-12	0	0	0	0	0	0	0	0	0	0	0	0	0	0	0	0	0	0	0.04	0.03	0.03	0.01	0.05	0.06	0.1	0.07	0.08	0.23	0.3	0.34	0.4	0.38	0.38	1	0.67	0.81	0.84	0.9	1.2	1.18	0.98
102294	Cyp4v3	0	0.01	1.2	120	3	Cluster Enriched	0.000386042	0	0	0	0	0	0	0	0	0	0	0	0	0	0	0	0	0	0	0	0	0	0	0	0	0	0.09	0.08	0.04	0.26	0.43	0.07	0.36	0.11	0.95	0.53	0.88	0.66	0.8	0.78	1.76	1.29
13122	Cyp7a1	0	0	0.07	Inf	3	Cluster Enriched	0.0040548	0	0	0	0	0	0	0	0	0	0	0	0	0	0	0	0	0	0	0	0	0	0	0	0	0	0	0	0	0	0	0	0	0	0	0	0	0.22	0.11	0.28	0	0.14
13124	Cyp8b1	0	0.44	1.49	3.38636	3	Cluster Enriched	6.67e-06	0	0	0	0	0	0	0	0	0	0	0	0	0	0	0	0	0	0	0.63	0.44	0.17	0.42	1.01	0.67	0.48	0.93	0.57	1.93	0.94	1.98	0.46	1.06	2.11	0.76	0.66	0.71	0.51	0.53	0.88	1.2	1.35
13138	Dag1	0.01	0.04	0.1	2.5	3	Cluster Enriched	0.00645813	0	0	0	0	0	0	0	0.03	0.02	0	0.03	0.03	0.03	0	0.04	0.01	0	0.24	0.04	0	0.04	0	0	0	0.14	0.02	0.05	0.06	0.04	0.07	0.09	0	0.13	0.13	0.05	0.09	0.09	0.11	0.13	0.04	0.05
28199	Dcaf11	0.07	0.08	0.65	8.125	3	Cluster Enriched	1.06e-07	0.05	0.01	0.12	0.03	0.06	0.04	0.07	0.05	0.08	0.07	0.06	0.17	0.02	0.06	0.11	0.06	0.06	0.17	0	0.08	0.07	0.04	0.11	0.06	0.14	0.13	0.1	0.36	0.35	0.1	0.14	0.15	0.21	0.65	0.77	0.33	1.29	0.78	0.83	1.04	1.23
320808	Dcaf5	0	0	0.01	Inf	3	Cluster Enriched	0.448495	0	0	0	0	0	0	0	0	0	0	0	0	0	0	0	0	0	0	0	0	0	0	0	0	0.02	0	0.01	0	0	0	0.09	0	0.03	0	0	0	0	0	0	0	0
67880	Dcxr	0.24	2.73	15.05	5.51282	3	Cluster Enriched	7.31e-09	0	0	0	0.07	0.05	0	0.04	0.48	0.55	0.12	0.22	0.43	0.16	0.12	1.42	0.51	0.37	1.21	0.82	1.65	1.19	1.13	4.39	2.22	6.32	8.2	4.78	5.56	6.24	6.56	14.2	7.99	5.97	20.46	15.7	14.04	26.23	34.6	26.45	14.94	20.75
13195	Ddc	0	0.2	1.76	8.8	3	Cluster Enriched	0.000112712	0	0	0	0	0	0	0	0	0	0	0.02	0.01	0	0	0	0.03	0.01	0.16	0.27	0.31	0.14	0.19	0.2	0.16	0.5	0.17	0.22	0.2	0.33	0.13	0.62	1.45	0.13	0.38	0.68	0.33	1.26	1.71	1.57	5.35	2.47
13202	Ddt	12.05	75.39	170.44	2.26078	3	Cluster Enriched	3.53e-08	5.3	11.09	9.44	7.21	5.97	7.03	8.77	15.82	15.38	12.38	13.87	16.71	16.3	11.96	23.54	10.92	16.61	30.92	57.22	72.31	29.07	82.21	104.49	99	121.78	149.63	130.55	131.96	124.53	127.74	150.3	191.47	101.99	143.72	158.42	102.67	199.84	156.24	175.25	261.69	456.22
26378	Decr2	0.1	2.93	14.78	5.04437	3	Cluster Enriched	3.25e-13	0	0	0	0	0	0	0.1	0.37	0.1	0	0.16	0.26	0.16	0.06	0.26	0.24	0.23	0.91	1.6	1.35	0.56	2.11	2.37	2.73	9.29	6.35	7.42	6.72	8.11	18.13	13.89	19.42	21.18	19.89	14.59	19.91	12.17	22	21.16	14.57	11.95
67819	Derl1	0.18	0.67	1.86	2.77612	3	Cluster Enriched	1.23e-06	0	0	0	0.21	0.45	0	0	0.73	0.57	0.3	0	0.37	0	0	0	0.52	0	0.96	0.36	0.35	0.38	0.76	0.21	0.65	0.95	0.89	1.99	1.75	2.02	1.44	0.04	3.22	2.22	0.63	0.92	2.3	1.34	2.73	3.17	3.11	0
13350	Dgat1	0	0	0.13	Inf	3	Cluster Enriched	1.44e-06	0	0	0	0	0	0	0	0	0	0	0	0	0	0	0	0	0	0	0	0	0	0	0	0	0	0	0	0.06	0.07	0.07	0	0.21	0.21	0.02	0.25	0.25	0.05	0.28	0	0.06	0.12
71755	Dhdh	0.08	0.67	5.91	8.8209	3	Cluster Enriched	1.58e-09	0	0	0	0.06	0	0.07	0.04	0.17	0.06	0	0.11	0.18	0.12	0.08	0.25	0.1	0.16	0.36	0.41	0.6	0.38	0.61	0.82	0.38	1.32	1.65	1.2	2.34	2.56	1.73	4.06	5.04	1.97	3.97	3.49	5.11	4.77	7.4	7.9	11.82	11.18
209692	Dhtkd1	0.03	0.42	2.3	5.47619	3	Cluster Enriched	4.23e-12	0	0	0	0	0	0	0.03	0.17	0.02	0	0.02	0.02	0	0.02	0.13	0.05	0	0.12	0.23	0.18	0.14	0.17	0.29	0.28	1.34	1.26	1.03	1.17	0.63	1.9	3.28	2.83	2.43	3.97	3.14	2.05	3.11	2.39	2.26	1.83	3.53
235339	Dlat	1.28	2.6	5.45	2.09615	3	Cluster Enriched	1.6e-11	0.72	1.02	2.03	1.12	1.36	1.25	1.02	1.41	1.56	0.98	0.94	1.84	1.29	1.01	1.7	1.21	0.97	2.18	1.72	2.33	2.2	2.03	3.28	3.01	5.21	4.24	2.83	3.52	3.32	5.96	5.2	4.17	3.44	5.17	5.54	6.97	3.76	6.27	7.48	7.78	7.61
13405	Dmd	0	0.01	0.08	8	3	Cluster Enriched	0.178677	0	0	0	0	0	0	0	0	0	0	0	0	0.01	0	0.01	0	0.01	0.01	0	0	0	0	0.06	0.03	0.02	0.02	0.02	0.01	0.03	0.03	0.03	0.04	0.78	0.06	0.03	0.02	0.06	0.04	0.03	0.03	0.07
74129	Dmgdh	0.53	5.92	35.99	6.07939	3	Cluster Enriched	1.62e-15	0.04	0.07	0.01	0.3	0.16	0.08	0.54	0.98	0.52	0.42	0.7	0.86	0.75	0.57	1.91	1.15	1.1	3.8	3.18	4.19	2.04	5.02	7.25	5.32	15.33	15.32	7.38	19.26	18.26	24.18	38.63	32.54	24.04	52.75	43.34	47.16	39.35	44.08	36.71	37	54.74
13482	Dpp4	0.12	0.52	4.56	8.76923	3	Cluster Enriched	6.29e-08	0.07	0.03	0.03	0.05	0.05	0.08	0.05	0.44	0.06	0.06	0.09	0.07	0.04	0.05	0.6	0.17	0.05	0.31	0.51	0.41	0.98	0.3	0.61	0.55	0.86	0.95	0.58	0.82	1.5	1.13	1.82	2.06	1.71	2.5	3.59	8.74	3.72	5.82	8.07	6.35	7.33
99586	Dpyd	0.07	1.21	6	4.95868	3	Cluster Enriched	4.44e-13	0	0	0	0	0	0	0.04	0.16	0.12	0.03	0.06	0.05	0.02	0.11	0.42	0.08	0.09	0.41	0.58	0.8	0.37	0.76	1.79	1.35	3.03	2.71	2.49	2.84	2.77	4.28	7.44	4.41	2.72	5.69	6.42	4.8	7.69	9.82	7.49	8.88	6.76
64705	Dpys	0.24	7.13	41.12	5.76718	3	Cluster Enriched	6.85e-12	0	0	0	0.02	0	0.01	0.04	0.53	0.24	0.43	0.25	0.45	0.22	0.07	1.38	1	1.38	8.87	5.36	5.49	4.32	5.74	6.77	6.34	12.5	17.46	10.35	15.51	21.77	25.68	53.45	36.78	31.99	51.65	63.98	53.47	63.52	69.77	52.66	23.02	52.58
72349	Dusp3	0.54	1.95	5.54	2.84103	3	Cluster Enriched	1.18e-08	0.7	0.36	1.3	0.28	0.3	0.52	0.13	0.27	0.5	0.26	0.7	0.29	0.89	0.66	0.93	0.55	0.79	2.24	1.1	1.22	0.68	2.24	4.72	1.78	5.21	1.94	0.97	5.44	3.46	4.82	4.58	5.2	6.42	8.92	8.64	8.79	1.48	4.4	1.54	7.66	2.49
52665	Echdc1	0.46	1.17	4.67	3.99145	3	Cluster Enriched	4.17e-07	0.36	0.45	0.42	1.18	0.11	0.25	0.27	0.33	0.4	0.59	1.12	0.38	0.41	0.33	0.29	0.26	0.58	0.74	1.86	2.61	0.69	1.26	2.44	0.64	0.79	1.44	0.76	1	1.88	1.41	4.37	3.52	1.56	3.74	3.13	2.23	3.09	5.93	5.8	6.75	10.87
67856	Echdc3	0.19	3.43	12.64	3.68513	3	Cluster Enriched	1.65e-10	0	0	0	0	0	0	0.15	0.29	0.13	0.35	0.3	0.28	0.47	0.19	0.74	0.9	0.56	1.76	2.7	3.82	1.79	4.48	4.3	2.91	5.76	5.58	6.56	5.96	11.96	10.83	19.89	12.27	10.44	24.51	25.45	14.85	11.83	13.3	14.12	10.11	11.72
69123	Eci3	0.01	0	1.42	142	3	Cluster Enriched	0.0045645	0	0	0	0	0.06	0.07	0	0	0	0	0	0	0	0	0	0	0	0	0	0	0	0	0	0	0	0	0	0	0	0	0	0	0	7.3	3.64	2.92	1.36	0	2.09	1.57	2.2
67484	Eepd1	0	0	0.02	Inf	3	Cluster Enriched	0.429526	0	0	0	0	0	0	0	0	0	0	0	0	0	0	0	0	0	0	0	0	0	0	0	0	0	0	0	0	0	0	0	0	0	0	0	0	0	0	0	0	0
13649	Egfr	0	0.67	2.27	3.38806	3	Cluster Enriched	3.77e-08	0	0	0	0	0	0	0	0	0	0	0	0	0	0	0	0	0.12	0.45	1.05	0.68	0.27	0.67	0.82	0.54	1.4	1.09	0.99	1.49	1.19	1.2	1.92	1.8	1.37	1.87	1.39	1.08	2.27	2.18	2.67	5.58	1.72
234683	Elmo3	0	0.03	0.07	2.33333	3	Cluster Enriched	0.155354	0	0	0	0	0	0	0	0	0	0	0	0	0	0	0	0	0	0	0	0	0	0	0	0	0.36	0	0.01	0	0	0	0.33	0	0.09	0.4	0.03	0.06	0.05	0.02	0.04	0.06	0
13717	Eln	0	0	0.16	Inf	3	Cluster Enriched	0.0568217	0	0	0	0	0	0	0	0	0	0	0	0	0	0	0	0	0	0	0	0	0	0	0	0	0	0	0	0.18	0.22	0.21	0	0.21	1.11	0	0.84	0.17	0	0	0	0	0
68519	Eml1	0	0	0.01	Inf	3	Cluster Enriched	0.382255	0	0	0	0	0	0	0	0	0	0	0	0	0	0	0	0	0	0	0	0	0	0	0	0	0	0	0	0	0	0	0	0.21	0.05	0	0	0	0	0	0	0	0
12499	Entpd5	0.12	0.74	3.06	4.13514	3	Cluster Enriched	3.15e-12	0.03	0.05	0.06	0.04	0.06	0.05	0.11	0.2	0.19	0.29	0.1	0.19	0.16	0.09	0.23	0.21	0.25	0.96	0.56	0.58	0.43	0.44	0.45	0.36	1.93	1.55	1.2	1.64	2.78	2.16	1.94	1.92	2.39	3.76	2.41	2.15	3.93	3.51	2.75	3.58	3.03
13846	Ephb4	0.01	0.01	0.03	3	3	Cluster Enriched	0.675473	0.02	0	0.01	0	0.01	0.02	0	0.01	0.01	0.01	0.01	0.05	0.01	0	0.01	0	0.01	0.01	0	0	0	0	0	0	0.04	0	0.03	0	0.52	0.01	0.01	0	0.03	0	0	0	0	0	0	0	0
66071	Ethe1	0.6	1.55	7.73	4.9871	3	Cluster Enriched	4.69e-05	0.38	0.37	0.35	0.47	0.42	0.25	0.53	0.83	0.59	0.98	1	0.88	0.65	0.75	0.59	1.33	0.97	0.97	0.75	1.2	0.91	1.43	1.95	1.49	2.7	3.29	1.66	2.11	3.66	1.88	4.63	3.05	2.02	4.03	2.97	4.03	7.05	7.18	4.32	20.77	20.07
214253	Etnk2	0	0	0.88	Inf	3	Cluster Enriched	0.0056281	0	0	0	0	0	0	0	0	0	0	0	0	0	0	0	0	0	0	0	0	0	0	0	0	0	0	0	0	0	0	0	0	0	0	0	0	3.84	0.57	0.43	0.51	2.71
14058	F10	0.19	0.28	0.58	2.07143	3	Cluster Enriched	0.0043347	0	0	0	0	0	0	0.06	0.76	0.5	0.17	0.03	0.1	0.18	0.49	0.5	0.11	0.05	0.29	0.29	0.17	0.65	0	0.28	0.57	0.47	0.18	0.27	1.13	0.41	0.74	0.85	0.72	0.66	0.68	0.37	0.94	0.91	1.24	0.9	0.58	0.08
58992	F12	0	0.01	0.04	4	3	Cluster Enriched	0.00716007	0	0	0	0	0	0	0	0	0	0	0	0	0	0	0	0	0	0	0	0	0	0	0	0	0	0.06	0.05	0.1	0.03	0	0	0.11	0.08	0	0	0	0.07	0	0.09	0	0
14071	F9	0	0	0.09	Inf	3	Cluster Enriched	0.247403	0	0	0	0	0	0	0	0	0	0	0	0	0	0	0	0	0	0	0	0	0	0	0	0	0	0	0	0	0	0	0	0	0	0	0	0	0.1	0.2	0	0.05	0
14073	Faah	0.04	0.55	3.78	6.87273	3	Cluster Enriched	4.3e-09	0	0	0	0	0	0	0.03	0.04	0.03	0.04	0.05	0.1	0.06	0.05	0.21	0.21	0.1	0.61	0.57	0.51	0.45	0.28	0.21	0.6	1.03	0.46	1.53	1.23	2.11	6.78	2.15	2.46	3.7	2.14	6.01	4.74	1.55	5.05	8.2	3.03	2.13
14080	Fabp1	39.72	627.96	4989.09	7.94492	3	Cluster Enriched	4.93e-10	1.01	1.68	14.13	38.08	13.32	7.16	38.52	86.44	59.27	23.89	37.88	84.26	27.25	19.1	143.76	37.22	88.68	278.29	279.28	288.45	166.41	229.01	459.54	1201.76	1367.75	1373.05	1766.12	2122.85	1420.6	3900.39	1989.39	2664.22	3484.7	2787.43	3227.21	5579.85	4351.28	4701.68	5787.33	6833.69	8469.81
14079	Fabp2	0	0	2.06	Inf	3	Cluster Enriched	0.00520813	0	0	0	0	0	0	0	0	0	0	0	0	0	0	0	0	0	0	0	0	0	0	0	0	0	0	0	0.51	2.67	0.56	0	2.13	1.64	3.25	10.17	6.79	0	0	0	0.79	4.81
328035	Fads6	0	0	0.08	Inf	3	Cluster Enriched	0.00474145	0	0	0	0	0	0	0	0	0	0	0	0	0	0	0	0	0	0	0	0	0	0	0	0	0	0	0	0	0	0	0.16	0.28	0.14	0.11	0.33	0	0.04	0.07	0	0	0
68636	Fahd1	0.35	2.16	7.02	3.25	3	Cluster Enriched	3.15e-13	0.14	0.1	0.39	0.12	0.24	0.33	0.13	0.38	0.55	0.39	0.54	0.56	0.13	0.31	0.87	0.43	0.6	1.43	0.68	1.27	1.77	0.68	1.92	2.97	5.11	4.8	4.2	5.67	5.52	6.8	4.89	6.59	6.46	7.77	8.73	12.42	8.55	9.56	8.71	7.85	6.88
14104	Fasn	3.83	7.31	17.39	2.37893	3	Cluster Enriched	0.00626689	3.22	3.3	5.16	3.38	3.62	3.29	2.28	4.97	3.85	3.94	3.27	5	3.28	3.36	5.46	4.41	5.16	9.4	12.07	12.26	6.89	7.66	9.29	3.77	6.65	5.33	4.8	5.15	3.2	2.75	2.2	1.92	1.39	1.15	1.71	2.05	13.88	31.76	32.98	30.39	51.57
218952	Fermt2	0.26	1.16	3.36	2.89655	3	Cluster Enriched	0.00167546	0.18	0.39	0.2	0.2	0.28	0.18	0.24	0.28	0.35	0.12	0.16	0.43	0.14	0.22	0.54	0.18	0.54	1.17	1	0.57	0.74	0.84	1.63	1.06	2.15	2.43	1.64	2.76	2.43	2.42	3.28	15.94	4.41	3.93	4.39	5.36	1.59	3.38	1.94	1.26	1.16
59083	Fetub	0	0.23	0.58	2.52174	3	Cluster Enriched	1.58e-09	0	0	0	0	0	0	0	0	0	0	0	0	0	0	0	0	0	0	0.23	0.28	0.14	0.29	0.37	0.29	0.25	0.54	0.37	0	0.46	0.53	0.84	0.61	0.51	0.81	0.93	0.97	0.85	0.57	0.76	0.72	0.42
14164	Fgf1	0	0	0.11	Inf	3	Cluster Enriched	0.00473588	0	0	0	0	0	0	0	0	0	0	0	0	0	0	0	0	0	0	0	0	0	0	0	0	0	0	0	0	0.12	0.18	0.5	0	0.15	0.35	0	0.3	0.28	0.16	0	0	0
75578	Fggy	0.49	2.11	5.25	2.48815	3	Cluster Enriched	9.83e-11	0	0	0	0.03	0.02	0.02	0.13	3.4	0.52	0.39	0.42	0.51	0.32	0.29	1.33	0.5	1.05	1.72	1.56	3.08	1.29	2.16	2.5	2.31	3.48	3.34	2.29	6.46	3.23	2.65	5.42	3.23	2.97	6.87	4.14	5.99	6.45	8.2	8.96	5.34	7.31
14262	Fmo3	0	0	5.9	Inf	3	Cluster Enriched	0.0309524	0	0	0	0	0	0	0	0	0	0	0	0	0	0	0	0	0	0	0	0	0	0	0	0	0	0	0	0	0	0	0	0	0	0	0.15	1.53	8.77	27.69	23.88	0.25	23.4
226564	Fmo4	0	0.2	0.48	2.4	3	Cluster Enriched	0.00352734	0	0	0	0	0	0	0	0	0	0	0	0	0	0	0	0.01	0	0.09	0.52	0.47	0.02	0.21	0.05	0.51	0.15	0.13	0.19	0.24	0.2	0.13	0.24	0.22	1.73	0.27	0.49	0.51	0.83	0.25	0.6	0.71	1.86
14263	Fmo5	0.19	2.93	26.09	8.90444	3	Cluster Enriched	7.31e-07	0	0	0	0.18	0.02	0	0.22	0.45	0.2	0.16	0.41	0.17	0.24	0.21	0.62	0.53	0.31	1.05	1.28	2.54	1.65	1.42	4.2	1.8	9.16	5.44	5.81	7.36	7.41	7.71	12.25	9.51	9.11	13.2	12.05	16.87	26.07	32.6	26.91	65.98	41.87
14317	Ftcd	1.81	18.09	49.2	2.71973	3	Cluster Enriched	1.74e-13	0.12	0.27	0.6	0.32	0.8	0.25	1.06	4.17	2.62	2.64	1.84	3.59	1.75	1.62	5.43	3.83	4.48	10.84	8.97	8.97	7.09	9.82	15.25	16.93	48.5	37.54	44.84	37.91	26.03	46.65	68.82	52.44	44.22	54.68	42.02	57.61	45.79	58.44	57.64	60.96	43.19
319625	Galm	1.1	4.72	11.38	2.41102	3	Cluster Enriched	1.14e-13	0.14	1.22	0.94	0.39	0.38	0.19	0.46	1.62	0.92	1.63	0.78	2.67	1.02	0.91	3.29	1.83	2.67	7.28	3.74	3.03	3.44	3.17	5.8	4.62	6.81	7.64	6.66	8.35	8.43	8.11	10.83	11.77	14.98	10.87	11.35	8.67	11.97	7.83	6.93	16.72	12.7
14453	Gas2	0	0	0.46	Inf	3	Cluster Enriched	0.0646635	0	0	0	0	0	0	0	0	0	0	0	0	0	0	0	0	0	0	0	0	0	0	0	0	0	0	0	0	0	0	0	0	0	0	0	0	0	0	0	3.61	1.11
14473	Gc	0.27	1.92	6.85	3.56771	3	Cluster Enriched	1.1e-12	0.05	0.04	0	0.1	0.03	0.12	0.08	0.25	0.39	0.25	0.27	0.35	0.21	0.27	1.59	0.53	0.59	3.99	1.98	4.66	1.95	0.77	1.34	0.63	2.01	3.2	1.4	4.57	3.63	6.51	4.52	6.22	3.77	6.31	4.75	8.85	8.1	11.84	10.08	7.37	10.09
320415	Gchfr	0.35	4.5	21.39	4.75333	3	Cluster Enriched	2.81e-10	0	0	0	0.18	0	0.13	0.23	0.77	0.64	0.42	0.74	0.91	0.34	0.49	0.39	0.77	0.91	3.86	1.89	3.87	1.53	2.17	6.47	3.23	9.83	11.8	7.67	11.87	9.42	13.91	18	27.5	13.16	30.05	31.31	28.2	17.26	43.11	41.47	15.66	17.57
103988	Gck	0	0.03	1.14	38	3	Cluster Enriched	0.00174744	0	0	0	0	0	0	0	0	0	0	0	0	0	0	0	0	0	0	0.12	0.07	0	0.02	0.17	0	0	0	0	0	0	0	0	0	0	0	0	0	3.89	3.65	3.41	1.29	1.65
231103	Gckr	0.11	0.88	5.5	6.25	3	Cluster Enriched	2.1e-09	0	0	0	0.05	0.01	0.03	0.19	0.08	0.09	0.06	0.3	0.16	0.16	0.21	0.36	0.11	0.22	0.57	1.45	0.44	0.74	1.71	0.97	0.5	1.15	1.04	1.62	3.89	2.25	2.77	7.01	5.2	4.71	6.4	5.36	12.34	5.18	10.9	10.11	3.43	4.48
14629	Gclc	0.37	0.7	8.26	11.8	3	Cluster Enriched	4.84e-10	0.28	0.24	0.7	0.23	0.33	0.3	0.37	0.35	0.36	0.27	0.29	0.48	0.36	0.28	0.75	0.26	0.36	1.1	0.37	0.26	0.36	0.53	0.72	0.67	0.83	1.53	1.37	2.07	2.58	3.38	2.17	5.7	4.58	7.61	12.4	12.08	8.55	12.75	10.69	16.29	6.45
107526	Gimap4	0.41	0.94	3.37	3.58511	3	Cluster Enriched	3.9e-09	0.37	0.17	0.33	0.23	0.53	0.54	0.45	0.73	0.55	0.13	0.27	0.6	0.27	0.32	0.61	0.38	0.36	0.57	0.35	0.38	0.47	0.39	1.34	1.67	1.17	2.05	2.2	2.31	3.35	3.73	2.88	4.56	4.87	3.79	4.39	4.89	3.07	6.98	4.47	1.85	0.92
104174	Gldc	0.5	1.15	4.3	3.73913	3	Cluster Enriched	2.03e-09	0.19	0.13	0.33	0.41	0.47	0.51	0.5	0.8	0.61	0.38	0.29	0.85	0.79	0.42	0.8	0.59	0.46	1.23	0.48	0.67	0.84	0.87	1.13	1.21	2.16	2.8	1.36	2.24	1.87	2.77	8.18	2.76	2.39	3.19	2.57	3.08	6.97	6.69	6.02	6.5	6.12
216456	Gls2	0	0.5	6.35	12.7	3	Cluster Enriched	2.65e-06	0	0	0	0	0	0	0	0	0	0	0	0	0	0.01	0.05	0.04	0.02	0.22	0.2	0.31	0.35	0.21	0.55	0.43	1.31	1.53	0.81	1.19	0.86	0.37	3.57	1.33	1.63	6.62	3.9	3.74	14.17	10.8	8.44	16.03	14.13
14661	Glud1	61.72	281.3	725.47	2.57899	3	Cluster Enriched	8.81e-09	23.23	24.38	29.31	36.29	39.13	38.99	40.18	114.63	79.01	68.27	51.04	94.68	77.91	47.14	161.58	126.77	123.17	256.2	170.17	185.52	203.63	214.92	325.13	266.96	560.08	485.71	457.29	577.48	637.73	777.44	863.72	723.01	707.69	1255.68	1177.39	1504.08	1054.77	767.94	708.21	357.75	379.99
107146	Glyat	0	0.37	24.65	66.6216	3	Cluster Enriched	1.4e-10	0	0	0	0	0	0	0	0	0	0	0	0	0	0	0	0	0	0	0	0	0	0	0	0	1.77	0.64	2.06	7.13	8.16	13.79	11	12.79	14.75	22.8	24.57	22.34	17.18	36.23	25.11	41.67	29.45
235582	Glyctk	0.18	1.12	4.38	3.91071	3	Cluster Enriched	7.44e-09	0	0	0	0.08	0.15	0.02	0.1	0.28	0.29	0.21	0.14	0.38	0.11	0.17	0.71	0.22	0.3	0.75	1.06	0.54	0.75	0.72	0.99	0.94	2.02	4.1	1.05	7.67	1.84	4.93	9.52	2.84	1.86	4	3.22	6.57	3.96	5.65	4.49	6.83	5.05
214403	Gm4788	0	0	0.1	Inf	3	Cluster Enriched	1.87e-05	0	0	0	0	0	0	0	0	0	0	0	0	0	0	0	0	0	0	0	0	0	0	0	0	0	0	0	0	0	0	0	0	0	0.2	0.1	0.13	0.13	0.12	0.18	0.16	0
14711	Gnmt	0.35	15.6	162.39	10.4096	3	Cluster Enriched	3.11e-06	0	0	0	0	0	0	0.05	0.5	0.27	0.26	0.17	0.89	0.12	0.08	2.95	1.36	1.37	8.52	7.68	10.37	4.26	9.37	31.21	11.08	48.72	25.63	27.66	30.03	12.29	16.12	108.87	32.92	22.45	89.87	48.43	47.27	248.92	274.64	234.36	321.08	288.37
76282	Gpt	0	0.02	19.76	988	3	Cluster Enriched	0.000250405	0	0	0	0	0	0	0	0	0	0	0	0	0	0	0	0	0	0	0	0	0	0	0	0	0.09	0.01	0.15	0	0	0	1.28	0	0.05	2.99	3.29	4.14	52.67	57.36	49.26	30.82	39.04
108682	Gpt2	0.38	0.15	3.01	7.92105	3	Cluster Enriched	0.0016853	0.05	0.7	0.05	0.82	0.13	1.56	0.14	0.13	0.08	0.61	0.41	0.08	0.57	0.05	0.27	0.1	0.04	0.34	0.03	0	0.08	0	1.05	0.1	0.07	0	0.04	0	0	0	0	0	0	0	0	0	2.88	4.04	4.07	7.11	7.4
14775	Gpx1	15.68	11.51	70.5	4.49617	3	Cluster Enriched	0.000188881	12.57	14.32	13.36	13.59	19.53	16.49	16.93	13.14	16.99	20.61	16.15	14.41	22.39	16.23	8.5	14.02	15.43	7.47	7.62	11.97	5.82	10.25	16.48	7.78	17.44	14.22	9.56	13.67	13.86	30.76	35.17	23.78	12.32	38.44	36.59	92.65	68.49	103.32	68.47	137.3	252.79
14860	Gsta4	1.23	12.81	42.82	3.3427	3	Cluster Enriched	1.12e-10	0.2	0.14	0.55	0.21	0.77	0.5	0.31	1.86	2.55	1.19	2.29	1.19	1.18	0.96	4.57	1.76	3.97	12.21	23.31	17.53	6.18	6.14	12.8	11.13	20.88	16.73	21.04	33.94	24.54	17.24	27.59	32.55	23.85	44.08	50.52	34.73	35.76	76.24	64.74	28.76	47.32
14864	Gstm3	3.43	11.08	82.27	7.42509	3	Cluster Enriched	0.000378157	0.68	0	0.82	1.36	3.15	0	1.41	9.54	4.78	3.12	2.99	7.05	1.75	1.53	13.32	3.7	7.05	9.58	5.8	6.92	4.64	7.09	11.94	12.09	25.14	16.33	22.65	6.94	13.11	12.68	15.73	12.42	11.4	9.68	18.24	26.46	92.81	198.59	190.15	184.75	94.48
14865	Gstm4	0.54	2.73	17.53	6.42125	3	Cluster Enriched	3.74e-05	0	0	0	0.57	0.64	0	0.72	1.63	1.22	0.99	0	2.33	0	0	0	1.58	2.47	0	2.99	3.19	2.93	2.94	2.86	0	5.21	4.21	4.41	0	3.66	7.49	5.49	5.7	2.99	6.03	4.91	8.3	13	41.59	30.97	22.3	22.28
14867	Gstm6	1.11	4.21	25.24	5.99525	3	Cluster Enriched	0.000284594	0	0	0	0	1.21	0.29	0.28	2.76	3.29	0.61	1.2	2.82	0.52	0.63	3.04	0.73	3.52	4.3	2.06	3.37	3.59	3.73	3.92	2.82	8.28	5.94	8.28	2.06	8.28	3.05	5.62	4.38	6.82	3.12	6.19	6.81	30.55	51.98	50.08	52.55	13.88
68312	Gstm7	2.87	9.35	49.27	5.26952	3	Cluster Enriched	0.000265195	0	0	0	0.91	2.31	1.1	1.86	5.65	4.09	1.83	3.75	6.96	2.28	1.84	10.51	2.88	7.29	10.9	7.77	8.5	7.41	7.71	10.1	6.69	15.48	12.56	14.87	5.33	12.78	12.66	13.2	10.58	11.19	12.76	14.06	12.85	42.02	129.57	103.76	69.85	36.58
14872	Gstt2	0.7	3.46	7.04	2.03468	3	Cluster Enriched	1.67e-06	0.16	0.2	0.22	0.28	0.23	0.3	0.35	1.13	0.94	1.07	0.81	0.96	0.98	0.67	2.25	1.27	1.13	2.68	1.63	2.16	1.4	2.01	3.11	2.62	7.76	8.12	7.66	7.15	7.87	6.32	11.83	10.74	9.15	6.17	5.43	2.39	2.75	3.62	3.53	8.24	13.2
268756	Gulo	1.46	3.66	31.4	8.57923	3	Cluster Enriched	3.95e-15	0.47	4.79	0.48	1.01	3.85	0.61	0.55	1.53	0.95	0.88	1	1.34	0.88	0.5	3.07	0.52	1.03	6.49	0.71	0.87	1.88	1.59	2.68	5.87	7.37	7	7.95	24.34	22.95	36.07	34.24	22.97	29.77	48.7	46.66	47.4	25.4	34.19	43.41	19.65	19.68
232493	Gys2	0.48	3.19	7.37	2.31034	3	Cluster Enriched	7.64e-09	0.08	0.11	0.07	0.69	0.15	0.87	0.71	0.91	0.45	0.23	0.29	0.78	0.29	0.13	1.5	0.8	1.17	2.66	2.3	3.04	1.03	2.6	3.31	3.57	4.92	6.39	6.55	5.96	3.74	6.19	12.16	16.05	12.1	7.02	4.01	5.89	2.88	5.08	6.04	9.5	7.58
15007	H2-Q10	0.08	0.36	1.11	3.08333	3	Cluster Enriched	1.18e-05	0	0	0	0.14	0.01	0.04	0.04	0.14	0.09	0.03	0.13	0.21	0.08	0.11	0.25	0.08	0.16	0.48	0.4	0.61	0.4	0.18	0.48	0.11	0.31	0.67	0.38	0.68	0.64	0.72	0.33	0.86	0.34	0.46	0.41	0.19	1.25	1.75	2.26	1.11	1.54
107766	Haao	1.16	11.8	78.64	6.66441	3	Cluster Enriched	6.1e-07	0	0	0	0.06	0.08	0.04	0.39	2.15	0.98	1.36	1	2.73	1.1	0.52	6.95	3.53	3.56	14.46	14.4	10.95	9.27	11.19	10.03	9.19	21.75	19.41	13.91	23.43	18.46	19.9	24.13	17.64	18.27	44.94	38.82	57.17	85.69	151.2	131.52	136.58	127.37
56541	Habp4	0	0	0.34	Inf	3	Cluster Enriched	0.0944345	0	0	0	0	0	0	0	0	0	0	0	0	0	0	0	0	0	0	0	0	0	0	0	0	0	0	0	0	0	0	0	0	0	2.19	0.09	0	0	0	0	0.08	0.08
56794	Hacl1	0.04	5.83	29.67	5.08919	3	Cluster Enriched	5.28e-11	0	0	0	0	0	0	0.02	0.08	0.05	0.11	0.19	0.05	0.04	0.02	0.09	0.11	0.16	2.36	3.38	3.26	1.54	4.81	3.57	4.36	16.05	16.29	14.02	18.51	13.4	30.04	44.96	22.44	16.65	31.54	23.71	35.68	38.9	56.96	53.52	38.65	26.71
[truncated: 605 more rows]
[truncated: 4 more columns]

## Sheet: Sheet5
GeneSymbol	Ratio	specific phase	specificity	Cluster1	Cluster2	Cluster3	FDR	E12.5_R	E13.5_R	E14.5_R	E15.5_R	E16.5_R	E17.5_R	E18.5_R	D1_R	D3_R	D5_R	W1_R	W2_R	W3_R	W6_R	W8_R
[truncated: 1,119 more rows]

## Sheet: Sheet6
GeneSymbol	Ratio	specific phase	specificity	Cluster1	Cluster2	Cluster3	FDR	E12.5_R	E13.5_R	E14.5_R	E15.5_R	E16.5_R	E17.5_R	E18.5_R	D1_R	D3_R	D5_R	W1_R	W2_R	W3_R	W6_R	W8_R
[truncated: 1,152 more rows]

[truncated: 3 more sheets: Sheet7, Sheet8, ReadMe]
