# Supplementary material for: A time-resolved multi-omic atlas of the developing mouse liver
Source: HighWire-hosted journal article supplement (doi:10.1101/gr.253328.119), 2020-02-01
Supplement: Supplemental_Table_S6.xlsx [file Supplemental_Table_S6.xlsx]

## Sheet: Sheet1
Gene.ID	GeneSymbol	P_R_cor	E12.5_P	E13.5_P	E14.5_P	E15.5_P	E16.5_P	E17.5_P	E18.5_P	D1_P	D3_P	D5_P	W1_P	W2_P	W3_P	W6_P	W8_P	E12.5_R	E13.5_R	E14.5_R	E15.5_R	E16.5_R	E17.5_R	E18.5_R	D1_R	D3_R	D5_R	W1_R	W2_R	W3_R	W6_R	W8_R
66050	0610009B22Rik	-0.47396	0	0.06	0.03	0.06	0.08	0	0	0	0.1	0	0	0.07	0	0	0	12.9008	10.6813	11.902	9.67555	8.80691	11.8781	9.3812	13.7325	12.6468	13.5066	18.4825	15.2207	20.5811	19.3387	19.9597
104457	0610010K14Rik	0.878347	1.65	0.48	0.4	0.16	0.14	0.09	0	0	0	0	0	0	0	0	0	47.695	53.1295	37.6743	30.3743	32.1525	26.0456	20.1481	20.4354	18.4875	14.9268	16.3689	11.501	17.1538	15.6854	12.5898
56372	1110004F10Rik	0.897343	0.58	0.61	0.49	0.28	0.16	0.17	0	0.28	0.24	0.15	0.35	0	0	0	0	72.7967	70.2787	64.1351	57.0834	45.879	40.5816	30.7944	38.5731	34.197	31.4474	35.4521	29.462	30.6709	27.1988	24.3433
117171	1110038F14Rik	0.591608	0.08	0.17	0	0	0	0	0	0	0	0	0	0	0	0	0	26.1568	26.4239	21.3638	17.5506	15.6529	13.2345	15.6137	13.2878	12.4852	11.696	11.4193	9.28458	11.2175	6.96529	6.85471
71775	1300017J02Rik	0.896429	0.01	0.02	0.06	0.08	0.1	0.34	0.35	0.2	0.29	0.74	1.11	1.36	1.1	0.54	0.79	24.5814	29.752	25.5588	52.1914	44.9727	80.3874	115.602	112.101	138.628	187.002	175.976	193.187	188.315	293.831	191.387
72244	1600014C10Rik	0.882932	0	0.09	0.5	0.72	0	0.53	2.08	0.81	2.79	6.03	8.06	13.99	4.77	2.7	4.78	2.64078	5.99549	4.87409	6.63086	17.1395	20.5859	52.9445	32.3688	51.0913	53.3607	63.0315	81.3832	34.7995	58.9862	38.8898
67851	1700021F05Rik	0.309295	0.16	0	0	0	0	0	0	0	0	0	0	0	0	0	0	14.4864	16.565	16.7474	10.3488	10.2348	10.0277	8.92403	12.6342	10.1415	10.4797	13.382	14.1189	13.7486	12.6084	10.3427
67326	1700037H04Rik	0.888449	0.89	0.76	1.01	0.88	0.78	0.5	0.38	0.07	0	0	0	0	0	0	0	89.9335	117.01	97.2387	88.9181	107.58	73.4039	48.9599	24.2774	19.7321	8.38546	7.87434	2.41725	1.77179	3.5836	3.02522
66276	1810009A15Rik	0.76313	1.27	2.68	1.02	0.68	0.53	0	0.64	0.3	0	0	0	0	0	0	0	97.6245	99.3333	76.4759	55.0306	43.0571	35.0838	30.0861	25.1627	31.1636	23.2765	25.6158	18.1521	27.3223	28.1731	29.3401
69155	1810030O07Rik	0.309295	0	0.13	0	0	0	0	0	0	0	0	0	0	0	0	0	8.35144	7.46097	8.26999	7.24187	5.6083	5.57329	4.64549	4.07712	4.71597	4.16322	3.55332	3.76838	2.41304	1.83517	1.94992
70153	2210016F16Rik	-0.0375335	0.52	0.54	0.54	0.5	0.51	0.68	0.66	0.47	0.89	1.11	1.64	1.8	1.4	0.74	0.77	15.7687	17.1371	13.0899	11.8922	10.6496	9.55548	9.61858	9.99266	10.5919	9.55662	11.0718	12.0294	12.4435	16.5421	10.7863
72357	2210016L21Rik	0.628009	0.09	0.11	0	0	0.01	0	0	0	0	0	0	0	0	0	0	10.645	10.1273	7.60599	8.24191	7.72535	7.11942	7.43989	6.68112	5.83026	6.48146	7.48233	8.32247	7.15334	5.86143	4.827
66374	2310011J03Rik	0.464835	0	0.13	0	0.06	0	0	0	0	0	0	0	0	0	0	0	27.3461	35.586	25.9391	22.0049	25.5512	16.9178	15.8235	17.7588	12.0125	11.898	10.3207	11.4324	11.3823	12.7471	7.6134
66367	2310022A10Rik	0.433013	0	0.02	0	0	0	0	0	0	0	0	0	0	0	0	0	15.3929	18.641	12.1884	12.3694	12.1233	7.31219	5.92884	4.81076	4.60871	3.43932	3.69263	2.71272	2.07148	2.14899	2.28621
69551	2310022B05Rik	0.433013	0	0.04	0	0	0	0	0	0	0	0	0	0	0	0	0	11.7114	15.7778	11.4627	11.628	13.2645	10.6524	8.32466	8.16924	10.1073	8.12195	7.59664	4.9938	3.20411	3.95782	3.4061
67862	2310033P09Rik	0.667632	0.15	0.32	0	0.12	0	0.07	0.18	0	0	0	0	0	0	0	0	29.306	34.1733	27.654	21.6562	18.9917	17.1294	16.0663	15.4244	12.3065	9.91711	11.7524	9.17128	10.7217	12.1597	10.4831
67101	2310039H08Rik	0.141019	0	0	0.11	0.08	0	0.32	0	1.02	1.63	0	1.41	0	0	0	0	25.2224	35.0822	25.8621	29.261	38.5274	44.1019	58.0283	102.152	60.1146	53.536	66.4178	72.8769	86.6182	68.8491	33.8639
68277	2310057M21Rik	0.374513	0	0.01	0	0	0	0	0	0	0	0	0	0	0	0	0	6.27398	5.02985	4.93686	4.17239	2.76357	3.21227	1.80921	2.52051	2.11778	1.61397	1.04131	0	0	0	0
69662	2310061I04Rik	-0.138847	0	0	0	0	0	0	0	0	0	0	0.07	0	0	0	0.09	16.2007	19.598	16.4556	12.4097	12.4395	7.61937	9.87348	15.3449	8.43803	9.75149	12.3209	7.57831	12.8218	20.2017	11.0227
668661	2410002F23Rik	0.23294	0.01	0	0	0.01	0	0	0	0.04	0.02	0	0.01	0	0	0	0	25.079	21.2287	12.9366	15.7247	11.3627	11.8067	11.929	10.3444	7.12866	6.21609	8.13184	6.24598	3.35511	2.19671	2.1231
67028	2610002M06Rik	0.272501	0	0.33	0.16	0.23	0	0	0	0	0	0.3	0	0	0	0	0.23	5.15175	3.85324	4.43136	3.99722	2.83844	3.39291	2.37887	2.13548	2.29162	2.34141	2.27153	2.31795	2.02378	1.37174	1.69734
67157	2610301B20Rik	0.301841	0	0.23	0	0.12	0	0	0	0	0	0	0	0	0	0	0	4.93724	2.85183	4.16769	4.35515	2.90239	3.38852	2.85953	2.21445	2.17805	2.41013	1.8267	2.12711	1.55215	0	1.95522
68046	2700062C07Rik	0.433013	0.01	0	0	0	0	0	0	0	0	0	0	0	0	0	0	8.85035	7.72795	6.46506	6.24755	4.47998	3.96902	4.36794	6.39483	6.48485	5.01939	5.20817	4.14921	5.47172	6.3572	5.48837
72658	2700097O09Rik	0.741325	0.16	0	0.02	0.03	0	0.02	0	0	0	0	0	0	0	0	0	6.92867	3.89085	6.70195	6.0466	5.89271	4.87847	3.33232	2.33833	3.5456	3.00795	3.92541	2.49172	3.10006	0	1.44144
66523	2810004N23Rik	0.585571	0.35	0.07	0	0	0	0	0	0	0	0	0	0	0	0	0	41.4713	48.1267	33.0243	24.5771	24.1296	20.6994	16.8131	13.1943	16.9774	13.5363	14.6921	11.0509	15.6708	18.0468	13.636
72792	2810459M11Rik	0.453571	0.03	0.12	0.21	0.27	0.36	0.49	0.3	0.46	0.94	0.75	1.04	1.02	0.52	0.29	0.48	9.98458	17.7301	16.8599	19.877	24.6192	17.0555	14.4149	26.6931	24.6194	26.6366	24.4254	20.7203	16.7314	21.7877	15.0896
73103	3110009E18Rik	0.511253	0	0.27	0.44	0	0	0	0	0	0	0	0	0	0	0	0	3.26756	3.05643	2.56012	2.48784	1.63394	2.27538	1.3606	1.03497	1.61526	0	0	0	0	0	0
73212	3110082I17Rik	0.585571	0.09	0.1	0	0	0	0	0	0	0	0	0	0	0	0	0	21.117	18.4258	13.3993	10.8553	8.02788	5.7477	6.34323	6.65593	5.73613	5.52716	4.54438	3.10993	3.45456	6.32453	4.03227
68281	4930430F08Rik	0.124162	0	0.03	0	0	0	0	0	0	0	0	0	0	0	0	0	5.26437	2.90124	5.81049	6.68335	3.34833	3.84251	2.13203	1.48669	1.46194	1.21923	1.12096	0	1.05282	0	0
70984	4931406C07Rik	0.892857	0.15	0.18	0.36	0.41	0.46	0.76	0.89	2.46	6.46	8.55	13.96	18.2	19.08	16.33	13.11	5.99015	4.08002	6.19971	7.72918	5.46034	7.62393	9.62147	49.1142	27.6534	41.758	38.6425	72.4207	56.5332	45.2926	39.2953
70591	5730455P16Rik	0.41654	0	0	0.33	0	0	0	0	0	0	0	0	0.05	0	0	0	2.98471	1.51006	2.49699	1.99853	1.21005	1.3148	1.34499	2.07437	1.86861	1.95048	1.65204	2.03188	2.10485	1.20482	1.86739
77877	6030458C11Rik	0.433013	0.13	0	0	0	0	0	0	0	0	0	0	0	0	0	0	15.8386	12.0627	14.9384	14.1784	9.21354	9.37397	7.48049	7.06231	7.68222	6.06828	5.75528	4.14668	2.64406	2.23831	2.23218
77727	6030468B19Rik	0.312094	0	0	0	0.14	0	0	0	0	0	0	0	0	0	0	0	66.5079	78.1332	84.5731	77.5215	68.9014	41.1743	26.1905	17.9814	13.5241	4.4518	4.78719	0	0	0	0
213673	9530068E07Rik	0.247436	0	0	0	0	0	0	0	0	0	0	0	0	0	0.28	0	34.5394	32.7962	31.2654	32.9072	31.8199	29.8285	42.5828	52.2141	43.2524	50.5606	38.6933	53.1162	40.72	44.8169	31.3722
69865	A1cf	0.778571	0.18	0.09	0.28	0.21	0.25	0.75	1.07	1	1.87	1.68	1.35	1.73	2.85	2.27	2.54	2.67283	2.03528	4.65441	4.66672	3.47894	4.08086	3.79027	3.9325	6.08573	9.68189	7.67942	10.2365	8.63874	5.09892	6.31148
232345	A2m	0.939789	0	0.06	0.24	0.18	0.47	1.53	1.91	0.97	0.2	0.14	0	0	0	0	0	3.38115	5.3843	18.139	40.1672	88.5567	174.089	322.014	12.374	9.19286	8.51299	4.60213	0	0	0	0
97159	A430005L14Rik	0.48585	0.13	0	0.08	0.15	0	0	0	0.05	0	0	0	0	0	0	0	27.8216	24.0096	21.7447	20.0434	21.3111	12.9156	14.1081	24.2362	17.9607	11.5226	17.5413	17.0409	22.3336	22.0204	12.2643
212439	AA986860	0.383326	0	0.01	0	0	0	0	0	0	0	0	0	0	0	0	0	5.53454	5.75457	6.10697	5.35492	4.35141	3.47841	1.73561	1.24621	0	0	0	0	0	0	1.10623
223921	Aaas	0.676318	0.17	0.17	0.11	0.18	0.21	0.08	0.04	0.1	0.13	0.2	0.15	0	0	0	0	30.5185	34.9195	26.0345	22.5421	20.5497	12.0283	10.3688	9.56073	11.1432	8.62062	7.96992	6.01199	6.1057	5.74259	4.06073
78894	Aacs	0.758752	0.21	0.24	0.25	0.24	0.29	0.41	0.64	0.27	0	0.03	0	0	1.67	1.84	2.49	10.8647	13.7139	9.65825	9.01756	10.2085	11.918	11.2879	3.13605	3.18623	3.56482	3.14364	2.83619	21.5522	37.6978	11.9209
67758	Aadac	0.910714	1.33	1.9	6.29	5.78	9.1	14.63	19.15	20.31	36.58	43.98	49.84	64.24	52.9	43.52	40.32	28.5295	16.2991	49.4107	83.5617	58.1229	106.957	94.415	79.9352	124.666	180.643	183.786	161.875	166.922	113.818	144.101
23923	Aadat	0.931189	0	0	0.1	0.06	0.05	0.17	0.2	0.63	1.77	3.22	5.33	7.96	5.74	3.45	4.43	1.6998	1.7374	3.74894	5.29954	4.82645	6.02894	6.88411	15.5257	18.1477	26.6642	28.4414	31.4954	33.5127	34.7667	37.0028
66273	Aamdc	0.371154	0	0	0	0	0	0	0	0	0	0	0	0	0	0	0.06	1.21822	3.93434	3.58002	3.79975	2.93346	2.58663	2.77254	1.28018	2.04166	1.77955	1.7426	3.04785	3.75341	6.1719	4.73484
227290	Aamp	0.275246	0.98	1.19	0.3	0.79	0.56	0.29	0.29	0.4	0.44	0.43	0.49	0.12	0.24	0.07	0	72.893	91.48	67.0085	70.5691	72.0021	69.1081	60.5782	81.6675	60.0651	60.1736	62.4433	68.2659	66.0503	85.1802	61.844
68295	Aar2	0.591608	0.06	0.14	0	0	0	0	0	0	0	0	0	0	0	0	0	8.31247	12.6349	8.03911	6.77121	7.68	6.03792	5.36397	5.85297	6.36208	5.48173	4.44188	4.74482	5.44692	8.1547	4.74651
234734	Aars	-0.0607143	2.77	2.87	2.26	2.12	1.89	1.87	1.83	2.15	3.09	3.06	3.71	3.83	4.64	3.85	3.48	48.3895	68.1045	47.1702	38.5792	42.8596	25.0828	24.2691	23.652	27.1166	25.8531	32.8558	11.5474	22.1877	59.8619	35.8121
224805	Aars2	0.114142	0.06	0.03	0.02	0.01	0.08	0.09	0.02	0.02	0.11	0.06	0.08	0.1	0.1	0.02	0.1	6.85546	7.76035	4.97299	4.57626	4.87071	4.06629	3.59136	4.58338	5.14053	4.9882	6.20824	3.64718	6.49973	6.83402	5.34197
69684	Aarsd1	-0.116488	0.57	0.62	0.49	0.28	0.28	0.2	0.23	0.42	0.59	0.62	0.76	0.61	0.57	0.42	0.6	32.065	44.8737	32.2867	27.2882	23.3427	14.7908	11.0589	10.8848	13.2794	9.67077	15.6689	9.42464	13.9642	17.2259	11.798
67618	Aasdhppt	0.663972	0.12	0.15	0.07	0.07	0	0	0	0	0.07	0	0	0	0.12	0	0.17	9.26183	5.90834	7.07801	7.37034	3.62834	5.4941	5.21119	6.70638	6.27564	5.41429	6.55317	5.64898	6.87257	4.59529	6.73439
30956	Aass	0.528571	0.21	0.36	0.88	0.84	0.93	1.62	2.58	5.89	11.92	7.56	12.16	16.13	11.74	16.17	13.92	11.6244	9.87173	12.563	13.943	11.2721	12.2687	7.39429	15.0037	24.9077	20.6373	26.0241	8.99094	51.6171	34.7832	46.6024
56321	Aatf	0.849177	0.17	0.32	0.14	0.09	0.05	0.03	0.08	0.01	0.03	0	0	0	0	0	0	23.8598	23.7145	17.0872	16.4912	11.2584	8.30923	6.38143	11.4433	7.85018	6.09467	7.14174	6.39288	5.11787	5.75351	4.52957
268860	Abat	0.614286	1.42	0.15	0.67	0.95	2	3.86	7.74	12.66	34.41	17.11	9.37	42.79	43.39	43.03	48.98	9.31255	10.4696	12.0401	17.9731	23.6363	23.9246	15.7631	14.0726	21.2237	28.4491	31.3915	10.5335	56.2458	34.2091	27.4918
11303	Abca1	0.295435	0.13	0.06	0.07	0.08	0.21	0.21	0.15	0.06	0.17	0.22	0.69	0.13	0.23	0.1	0.02	6.03378	4.23004	8.73674	11.4116	9.83085	16.7394	11.993	8.26322	12.2029	15.6954	11.8525	12.2497	7.52814	5.40178	12.5395
27410	Abca3	0.459469	0	0.01	0.02	0.01	0.01	0	0	0	0	0	0.11	0	0	0	0	16.0281	20.1567	19.0913	16.4288	17.0991	11.5051	9.35327	6.63726	10.8567	9.18383	7.2441	6.29321	13.1252	11.1684	8.14539
76184	Abca6	0.676209	0	0	0.01	0.01	0.02	0.05	0.13	0.37	0.87	0.34	1.1	0.66	0.49	0.57	1.09	0	1.23969	1.82085	3.09626	3.47492	5.47203	10.37	19.8157	9.88508	14.6859	9.18029	18.6377	20.1446	6.55215	7.38005
27404	Abca8b	0.53877	0	0	0	0	0	0.04	0.09	0.11	0.18	0.16	0.2	0.27	0.09	0.06	0.13	4.40468	2.12934	5.11559	6.60236	5.44882	16.7331	25.0526	6.40845	13.6284	14.7809	14.0126	15.0421	11.8357	4.12101	4.80125
56199	Abcb10	0.892857	0.9	0.97	1.08	0.67	0.86	0.5	0.33	0.24	0.38	0.68	0.13	0.08	0.02	0.12	0.2	110.01	102.235	121.673	111.917	93.8114	78.5161	44.9167	25.593	32.6154	13.9274	13.2448	3.14775	5.67719	7.41194	6.75622
27413	Abcb11	0.859445	0	0	0.11	0.02	0.02	0.22	0.65	1.4	2.72	2.77	3.98	2.9	3.83	3.12	3.49	0	0	2.58217	6.37989	5.87277	14.5697	35.6994	13.7012	35.0272	53.5739	31.8613	45.5209	76.1209	58.4787	56.5006
18671	Abcb1a	0.645067	0	0	0	0	0	0	0	0.05	0.06	0	0.51	0.05	0	0	0	0	0	0	0	0	0	0	0	1.00186	2.06934	1.10767	2.82473	0	0	0
18670	Abcb4	0.644008	0	0	0.02	0.03	0.09	0.02	0.11	0.23	0.48	0.61	1.79	1.13	0.26	0.22	0.41	19.9591	20.9556	28.9948	26.8576	20.1277	20.6431	27.0399	44.2498	41.8404	40.8295	36.034	42.0147	27.3635	22.6467	20.5996
74104	Abcb6	-0.424213	0.12	0.1	0.11	0.05	0.05	0.05	0.04	0.05	0.14	0.1	0.28	0.36	0.16	0.14	0.32	44.167	52.5814	43.4396	38.5171	37.4703	25.8213	17.3776	22.0891	21.1151	17.402	16.4661	17.2194	22.3137	25.3006	15.9338
11306	Abcb7	-0.107143	0.18	0.21	0.26	0.11	0.13	0.22	0.19	0.28	0.52	0.57	0.95	1.11	0.96	0.75	0.66	8.6212	4.2689	8.79522	7.97434	4.20983	5.54387	4.1721	4.95524	4.95907	5.78625	5.17922	6.72883	5.2802	2.32329	4.01499
74610	Abcb8	-0.56682	0.02	0.02	0.04	0.02	0.02	0.07	0.04	0.08	0.19	0.2	0.23	0.22	0.24	0.21	0.19	13.8432	18.9547	12.2727	12.2734	13.7055	11.368	11.5018	12.7629	11.189	10.9251	11.6311	10.7169	13.5079	10.7405	7.39989
12780	Abcc2	0.812166	0	0	0.01	0.01	0.02	0.04	0.15	0.49	0.59	0.34	0.81	0.4	0.53	0.33	0.83	5.59388	5.5854	7.28522	7.6963	7.14054	10.6103	17.3146	23.5375	20.4314	31.1115	21.5785	33.3394	36.3709	14.3277	19.2947
76408	Abcc3	0.679336	0	0	0.01	0	0	0	0	0	0	0.01	0.05	0.05	0.11	0.08	0.26	2.30051	2.96869	2.42678	3.32657	5.34454	3.90212	4.59482	5.7925	5.31977	6.94654	4.68542	7.01413	15.9916	21.8854	7.68535
27421	Abcc6	0.945301	0	0	0.02	0.02	0.02	0.06	0.1	0.15	0.22	0.42	0.6	1.38	0.9	0.61	0.54	3.88429	5.56956	6.40526	10.8975	15.0713	15.4527	16.7839	14.338	23.6094	34.8451	36.2838	47.3328	39.7849	28.7267	21.2063
11666	Abcd1	-0.512028	0	0.02	0.03	0.01	0	0	0.01	0.02	0.03	0	0.19	0.03	0.21	0	0.05	6.09792	10.081	5.91547	6.12143	8.88894	4.37112	4.50563	6.82425	4.58829	4.71948	3.26737	3.2256	4.1684	5.64055	3.0473
26874	Abcd2	0.775093	0	0	0	0	0	0.17	1.02	0.91	3	3.74	5.08	3.14	1.07	0.48	0	0	0	1.07033	2.24197	2.4025	6.43949	16.8091	31.0973	18.4519	25.5885	17.1403	29.5723	18.5084	0	0
19299	Abcd3	0.839286	0.07	0.08	0.16	0.13	0.17	0.32	0.64	1.82	4.81	4.53	5.76	6.11	9.05	10.03	11.7	11.833	8.22713	11.2283	13.7565	11.1198	14.2784	23.1072	58.9987	40.8597	53.362	53.0224	63.4627	74.5626	64.8047	49.7746
24015	Abce1	0.421429	3.38	3.61	2.75	2.06	1.89	1.87	1.34	2.45	3.36	2.48	2.54	3.11	2.85	1.74	2.39	49.8829	19.8154	35.0042	31.835	12.4344	19.802	13.5251	14.7669	16.4922	13.1648	14.2091	7.82927	13.8233	6.47196	12.6869
224742	Abcf1	-0.123435	1.78	1.39	0.85	0.91	0.96	1.11	0.74	1.21	1.39	0.97	1.24	1.28	1.67	1.04	1.28	75.0995	88.04	61.8428	54.5524	47.3906	40.3934	33.5668	36.717	30.1309	24.5473	24.328	23.8831	24.597	27.8	22.0185
27407	Abcf2	0.246429	1.53	1.4	0.86	0.6	0.68	0.49	0.75	0.36	0.45	1.5	0.57	0.28	1.36	1.8	1.07	45.7553	53.6072	35.5457	28.9387	25.3441	17.1494	12.9428	16.4778	14.0326	11.5366	10.6887	7.96406	9.89011	15.2692	11.8803
27406	Abcf3	-0.292857	0.26	0.25	0.2	0.14	0.28	0.27	0.36	3.57	3.58	2.23	4.28	2.85	9.37	0.48	2.62	18.2863	18.0307	15.9628	14.9606	14.2906	11.7343	12.0055	13.076	12.9426	11.9443	13.1292	12.4176	15.0735	16.5681	16.3144
26357	Abcg2	0.0571429	0.33	0.42	0.43	0.57	0.38	0.23	0.22	0.16	0.17	0.6	1.39	0.24	0.82	1.37	2.54	7.20398	4.392	9.69633	11.7548	6.4148	6.76907	16.0821	2.5453	2.18689	21.9871	1.64745	2.44686	11.9041	11.8363	1.37431
192663	Abcg4	0.66897	0.02	0.02	0	0.02	0.02	0	0	0	0	0	0	0	0	0	0	15.7059	17.1223	17.5028	14.789	18.3677	10.8922	6.84281	4.17281	5.19077	1.83722	2.0414	0	0	0	0
27409	Abcg5	0.744426	0	0	0	0	0	0	0	0	0	0.07	0.24	0.82	0.19	0	0.06	0	0	0	0	0	0	1.97117	12.6796	29.2779	32.7107	20.6288	59.6136	35.4232	12.6365	10.384
67470	Abcg8	0.921475	0	0	0	0	0	0	0	0.03	0.04	0.24	0.44	0.85	0.23	0.1	0.12	0	0	0	0	0	0	1.14805	8.35972	18.34	24.6003	15.6031	45.9606	16.6264	12.8995	8.47482
213012	Abhd10	0.265713	0.02	0.05	0.04	0.09	0.04	0.09	0.08	0	0.16	0.33	0.74	0.59	0.42	0	0	5.32953	4.82491	5.84576	5.61789	3.57482	3.15574	3.16307	2.93746	3.29201	3.73347	4.78201	4.46831	2.91199	1.26894	1.88086
68758	Abhd11	0.555854	0	0.15	0.13	0.12	0.06	0.33	0.33	0.59	1.02	0.62	1.01	2.18	1.5	2.65	2.04	20.6266	21.4841	14.644	16.1528	13.2222	16.6172	14.8526	27.0256	17.3856	16.2575	19.9437	24.8539	28.1638	23.5713	19.5292
76192	Abhd12	0.330949	0.04	0.09	0.06	0.08	0.03	0.05	0.06	0.15	0.23	0.45	0.84	0.61	1.38	0.23	0.25	12.0232	14.6349	10.0114	9.86579	12.6484	7.95754	9.45358	13.8389	13.222	13.9659	12.565	9.21552	14.4953	18.8563	10.7788
76491	Abhd14b	0.985714	0.61	0.92	2.82	2.73	3.19	6.28	8.48	10.26	19.33	23.15	36.18	46.9	64.84	62.29	61.29	11.9555	17.571	17.8551	23.6862	31.3059	27.613	35.7955	49.6645	55.7663	62.9996	63.858	99.7977	103.535	129.454	63.96
67477	Abhd15	0.123718	0	0	0	0	0	0	0	0	0	0	0	0	0	0	0.02	1.20875	1.37993	1.25076	1.30664	2.97705	0	1.33257	6.00373	5.02515	6.53621	3.86774	3.99398	10.6216	8.2869	4.44981
193742	Abhd16a	-0.572719	0.02	0.05	0.12	0.06	0.06	0.08	0.05	0.08	0.06	0.23	0.36	0.42	0.29	0.19	0.21	22.8211	30.8008	24.0447	24.9081	25.0083	19.1487	19.0437	19.4805	19.5338	16.8078	20.5489	17.4259	16.2679	21.6579	14.5665
54608	Abhd2	0.878347	0	0	0	0	0	0	0	0.04	0.19	0.52	0.49	0.11	0.07	0	0	10.3043	10.6134	12.9511	15.3176	14.1401	14.7295	19.6927	43.7926	70.4618	111.549	90.576	88.9923	21.1838	8.02548	7.37699
106861	Abhd3	0.607586	0	0	0	0	0	0	0	0	0	0.11	0	0	0	0.1	0.12	2.69469	1.95274	3.70672	4.20689	3.40049	4.62976	6.25011	8.58683	9.19422	11.0456	11.3948	10.9003	12.2757	19.3872	18.1881
105501	Abhd4	0.15092	0	0	0	0	0	0	0	0	0	0	0	0	0	0.07	0.1	8.91294	11.2623	8.63792	9.64146	11.3839	9.22144	9.40108	9.64667	9.59022	10.0398	10.4159	11.9745	12.8564	16.7405	9.48996
67469	Abhd5	0.435432	0	0	0	0	0	0	0.09	0.05	0.21	0.13	0	0	0	0	0	9.33234	10.3822	11.8669	10.8966	9.77003	24.0537	28.2447	10.1112	12.2988	10.9041	7.96871	7.02853	7.20384	12.8131	9.94764
66082	Abhd6	0.791779	0	0.06	0.07	0.04	0.09	0.03	0	0.24	0.66	0.39	0.55	0.57	0.59	0.5	0.58	3.60389	4.04538	3.63413	3.23025	2.83901	2.78807	3.28229	6.69098	7.49669	7.57875	9.53493	8.87252	13.637	18.2754	10.1943
11308	Abi1	0.621309	0.23	0.17	0.27	0.18	0.19	0.26	0.09	0.21	0.26	0.16	0.27	0.22	0.14	0.11	0.09	11.4683	10.7325	14.2569	11.7288	12.3253	11.9488	8.63551	12.0387	11.1927	10.4322	9.77355	11.9795	10.0987	6.07448	6.7859
329165	Abi2	-0.185743	0	0.03	0	0	0	0	0	0	0	0	0	0	0	0	0	2.58201	1.34251	1.86984	1.83768	1.17888	1.42392	1.23545	1.78438	1.65892	1.48808	1.40534	1.98044	1.39697	0	0
230234	Abitram	0.830322	0.22	0.16	0.08	0.06	0.12	0.06	0	0	0	0	0	0	0	0	0	4.61677	4.72516	3.13953	2.73657	2.34066	1.45083	1.4563	1.228	1.55665	1.34967	0	0	1.02038	0	0
11350	Abl1	0.371154	0.01	0	0	0	0	0	0	0	0	0	0	0	0	0	0	12.8688	14.4832	9.8106	10.0537	10.7728	7.01929	6.30152	8.23951	8.66191	9.54226	8.15703	6.41473	5.13267	4.03983	2.87178
11352	Abl2	0.312094	0.01	0	0	0	0	0	0	0	0	0	0	0	0	0	0	2.46297	2.42246	2.79983	2.20172	2.51814	1.60162	1.34539	1.89819	1.38266	1.3438	1.07519	0	0	0	0
226251	Ablim1	0.516995	0	0	0.02	0.01	0.03	0.06	0.07	0.15	0.21	0.26	0.19	0.3	0.44	0.07	0.11	1.62643	1.43437	2.71283	2.37465	2.73514	4.34954	3.87759	5.05736	5.53453	5.02967	3.74363	4.89471	1.73801	1.69564	1.30187
319713	Ablim3	0.418718	0	0	0	0	0	0	0	0	0	0	0	0	0	0	0.03	0	0	0	0	0	0	1.41229	1.61491	0	0	1.12122	0	2.52404	8.04626	5.75924
73112	Abracl	0.507143	7.98	4.75	4.24	3.27	2.6	3.26	2.83	4.81	6.96	3.8	6.12	3.99	3.55	0.98	1.51	36.2504	25.1989	30.5517	26.0792	15.641	20.5502	16.3272	20.0172	17.7188	14.1711	13.4879	11.0633	11.1114	3.58684	6.53172
109359	Abraxas2	-0.43502	0	0.05	0	0	0.04	0.09	0.13	0	0.16	0.22	0	0.16	0.32	0.23	0.71	7.81194	5.02229	7.47734	5.91587	5.05637	5.73313	5.37826	6.04393	5.94808	7.10525	5.98867	6.20154	5.91893	4.4821	4.66288
30946	Abt1	0.751693	0.08	0.18	0.16	0.14	0	0	0	0	0	0	0	0	0	0	0	18.2485	17.9743	16.2867	12.2984	11.2348	10.1918	8.53435	9.59627	8.22694	9.21777	8.91928	8.92929	7.91181	9.29067	8.24755
113868	Acaa1a	0.760714	1.21	0.7	1.07	1.28	1.11	2.45	3.5	7.47	20.74	18.97	23.44	29.22	22.72	22.91	17.89	17.679	27.1104	20.849	21.7077	30.5409	20.9691	26.7377	58.1487	44.7085	58.8145	46.6434	68.175	33.44	77.3257	46.8337
235674	Acaa1b	0.878142	0	0	0	0.7	0.35	1.09	1.58	4.38	14.56	14.11	15.58	27.82	23.53	23.24	22.28	4.43101	3.47978	4.49166	9.82052	17.5732	27.5975	58.1186	341.133	131.638	248.656	263.394	632.344	148.973	465.48	113.616
52538	Acaa2	0.878571	5.96	6.37	21.07	24.77	30.51	90.59	141.05	217.49	459.99	667.76	788.56	1298.43	866.05	776.14	703.1	89.2294	137.944	124.967	177.323	347.016	390.327	509.839	572.93	495.998	656.36	712.92	787.088	512.081	653.674	353.949
107476	Acaca	-0.634495	0.22	0.22	0.23	0.26	0.24	0.39	0.52	0.56	0.51	0.42	0.58	0.48	1.25	1	1.15	6.62577	6.06433	5.5728	5.80228	5.88283	1.75544	8.29288	0	4.38046	4.81623	1.192	2.17707	3.21387	2.48104	1.25903
100705	Acacb	0.618182	0	0	0	0	0	0	0.05	0.06	0.07	0	0	0	0.22	0.41	0.47	0	0	0	0	0	1.321	7.28516	0	0	0	0	1.04366	2.32332	14.3533	5.15452
71985	Acad10	0.730052	0	0	0	0.77	1.11	1.52	0.59	1.49	1.18	1.45	1.54	3.41	1.52	2.36	2.17	1.26705	1.49971	0	2.09484	2.8778	3.11861	3.26364	3.85219	4.73057	7.47226	5.47976	9.16177	8.3327	5.47432	2.50606
102632	Acad11	0.864286	0.13	0.16	0.41	0.22	0.62	0.83	1.58	3.55	8.83	8.49	11.78	7.63	7.02	6.59	5.58	6.29443	6.642	9.93813	11.3828	12.2158	19.1138	27.0815	56.5168	39.7345	61.1913	46.9744	83.4986	41.956	39.09	41.9457
338350	Acad12	0.667682	0	0	0	0.02	0	0.04	0.04	0	0.16	0.32	0.56	1.28	0.87	0.64	0.76	0	0	0	0	0	1.05179	1.7936	0	1.21626	1.96955	1.8167	4.95578	0	1.20634	1.17949
66948	Acad8	0.867857	0.07	0.43	0.15	0.16	0.18	0.31	0.62	1.13	2.22	5.02	5.1	9.72	6.6	7.36	6.31	6.06431	4.53538	4.76338	4.75127	4.40493	7.4186	6.83353	7.24627	7.16977	9.29746	8.2852	10.9119	11.6578	15.6621	10.5649
229211	Acad9	-0.0678571	0.65	0.43	0.41	0.59	0.69	0.83	0.54	0.97	1.77	2.22	3.22	5.15	6.2	6.54	2.91	8.84506	8.65413	8.22023	6.44173	3.93672	6.73017	5.12137	6.08844	6.2743	9.89624	7.87431	8.94846	7.23592	4.87885	4.81791
11363	Acadl	0.782143	2.72	3.28	7.2	7.67	8.97	18.78	22.78	42.51	88.55	129.95	173.08	219.54	97.51	69.87	31.37	37.7566	33.7499	79.7109	66.2755	65.8744	83.5131	85.2363	187.208	137.354	173.381	178.989	276.15	92.0307	42.4478	41.5654
11364	Acadm	0.792857	1.69	1.85	3.98	4.16	7.11	15.4	31.28	41.62	75.51	80.84	88.92	118.01	60.85	49.58	35.7	28.5067	20.7673	36.6518	45.4726	63.767	131.352	130.157	140.096	89.4732	135.079	138.695	217.503	104.21	46.8038	58.9418
11409	Acads	0.928571	2.6	1.46	3.11	3.49	3.69	7.05	10.98	14.33	30.69	48.18	61.25	89.36	70.68	48.71	36.03	21.9622	34.0246	25.0691	28.2027	42.2119	34.3448	42.6905	57.8635	51.439	71.1112	69.8177	102.916	63.2837	94.8919	48.4703
66885	Acadsb	0.842857	0.24	0.2	0.28	0.42	0.45	0.63	0.76	1.09	1.61	1.56	2.19	4.32	6.13	6.31	7.1	6.51238	3.81923	8.08983	8.57503	6.6322	9.58525	8.18593	5.8282	8.21848	10.7843	10.3694	12.313	21.5179	17.4242	21.2648
11370	Acadvl	0.882143	0.71	0.84	1.77	1.41	1.85	3.87	4.5	11.68	36.56	45.84	66.51	80.34	53.49	31.09	27.33	38.8541	43.3622	43.8266	52.9722	65.6657	69.6493	98.8942	168.857	145.957	163.977	164.854	236.438	147.974	167.174	118.495
78618	Acap2	0.455764	0.42	0.14	0.09	0.05	0	0.06	0.17	0.24	0.36	0.27	0.62	0.07	1.19	0	0.01	4.78898	2.96426	4.21412	4.21287	2.92399	3.91005	4.23777	4.27227	4.38154	4.05176	3.94446	4.233	2.54482	0	1.54958
110446	Acat1	0.796429	4.95	4.55	11.27	12.24	13.75	23.72	49.63	67.56	165	178.52	269.93	406.25	215.98	85.94	70.59	21.4224	17.7454	34.2155	48.1794	49.1755	81.6001	130.61	120.235	144.554	197.861	207.527	288.903	81.2043	47.2622	35.0556
110460	Acat2	-0.153571	1.19	1.51	2.55	2.95	3.47	6.64	8.95	8.84	10.64	10.74	10.06	21.48	44.99	28.75	19.87	44.9492	42.6111	43.9252	44.7801	45.7741	48.2745	41.1723	18.9119	24.1065	30.8436	35.522	22.9584	90.3256	42.5128	46.9643
224530	Acat3	0.945487	0	0	1.79	2.11	2.42	5.24	6.45	9.09	12.04	15.38	12.62	34.54	52.69	39.58	30.94	7.87443	15.9465	22.1403	16.0001	18.6529	30.4262	20.7261	34.6588	52.621	69.7841	92.0106	58.9367	124.062	123.716	102.164
170760	Acbd3	-0.221429	0.17	0.18	0.22	0.21	0.19	0.34	0.33	0.53	1.27	1.12	1.48	1.08	1.25	0.63	0.61	11.7143	8.77616	11.6285	10.9434	7.42319	8.94477	8.8819	8.46465	9.98644	9.14434	10.1874	8.3665	5.33174	3.59034	5.17872
74159	Acbd5	0.8311	0.4	0.27	1.13	0.06	0.76	0.76	0.87	0.79	1.8	1.62	2.31	2.58	3.5	2.23	4.68	5.6487	1.52706	6.33371	7.6486	3.31012	7.21326	7.22883	12.824	9.18043	17.3285	18.2017	26.125	36.5984	10.8157	23.9196
72482	Acbd6	0.520178	0.11	0.1	0.14	0.07	0	0.05	0	0.05	0.07	0	0	0	0	0	0	46.4387	65.6619	38.6186	31.6348	34.2657	28.1905	25.1992	25.5885	17.7501	17.7885	20.6927	23.6058	27.4087	33.6027	21.2465
56215	Acin1	0.774599	1.27	1.26	0.81	0.81	0.99	0.97	0.78	0.6	1.27	0.75	0.79	0.73	0.39	0.37	0.3	63.0756	67.2871	65.6374	55.2161	52.9451	53.5019	41.0743	31.8356	30.5226	25.4881	32.3592	24.0374	21.1561	14.4745	15.4942
104112	Acly	0.175	3.1	4.69	6.84	6.51	7.36	9.43	17.44	7.48	9.56	5.26	4.53	3.3	19.38	25.52	20.39	55.2123	54.0727	46.4175	55.0489	58.5536	54.0966	50.7446	18.8401	27.5562	28.3825	24.7496	12.8715	38.9989	60.2597	34.4995
266645	Acmsd	0.501504	0	0	0	0	0	0	0	0	0	0	0	0	0	1.21	0.42	2.96752	2.81716	3.92019	3.03979	2.00425	2.70515	1.28975	1.05249	1.44783	0	1.64146	0	8.65308	7.30278	6.39786
230161	Acnat1	0.913735	0	0	0	0	0	0	0.22	0.12	0.61	0.97	0.99	1.31	1	0.43	0.4	0	0	1.46416	0	0	1.88108	3.51708	3.7705	5.72824	7.48061	19.963	7.72597	12.1486	4.46704	10.1842
209186	Acnat2	0.703252	0	0	0	0	0	0	0	0	0.13	0.54	0.91	0.89	0.76	0.16	0	0	0	0	0	0	0	7.07327	4.73338	9.15321	11.2502	18.2665	10.0467	27.6876	7.57235	29.0317
11428	Aco1	0.475	0.73	1.09	1.66	1.59	2.46	5.03	7.82	10.99	11.86	11.49	10.85	12.62	20.01	22.31	28.39	15.2543	18.8034	16.6787	22.5594	44.5794	42.5259	34.1512	27.3544	33.313	41.1744	38.6062	27.3383	37.5772	52.0051	33.301
11429	Aco2	-0.639286	7.63	7	8.83	8.27	8.95	13.36	18.16	26.3	41.23	36.37	39.2	30.15	33.14	37.62	33.34	90.9745	119.269	94.4804	79.2595	102.164	78.5449	71.1123	66.4713	72.2555	62.62	79.7408	70.718	71.4397	59.3114	42.432
26897	Acot1	-0.219839	1.01	0.83	1.43	1.47	1.11	2.08	1.75	3.9	8.4	3.9	4.15	0	0.5	2.78	2.1	14.888	19.8303	14.9446	21.6268	17.6379	12.2256	10.3556	37.8728	3.61154	6.20221	5.61603	7.26136	1.11879	5.30118	1.56454
329910	Acot11	0.601514	0.07	0.02	0.03	0.02	0	0	0	0	0	0	0	0	0	0	0.02	5.7081	4.96777	6.93989	4.32543	6.09187	3.01218	0	0	1.07197	0	0	0	0	0	0
74156	Acot12	0.895274	0	0	0	0	0	0	0.21	0.4	0.93	1.37	2.98	2.55	2.67	1.69	1.13	0	0	1.39954	2.36355	3.22835	4.70778	7.123	13.0668	12.3015	18.0529	17.7322	34.7313	23.9825	11.4498	10.9598
66834	Acot13	0.770614	0	0	0.49	0.9	0	1.24	0.96	0.92	6.19	7.22	6.76	13.07	16.56	16.85	11.68	21.5757	16.09	27.3909	24.2118	15.1143	23.9409	20.4257	24.5339	28.3425	31.1393	37.4307	57.763	47.9498	24.9851	27.4501
171210	Acot2	0.44504	0.6	1.01	1.96	1.37	1.28	1.77	1.41	3.84	7.76	4.37	5.76	3.71	0.8	2.87	0	5.09329	4.24326	4.96878	4.63231	3.34079	3.76993	2.00357	13.0886	3.32687	5.78202	6.13076	12.2666	1.40445	0	0
171281	Acot3	0.403335	0	0	0.06	0	0	0	0.18	1.09	4.48	1.62	3.84	1.61	1.53	1.69	0	1.42829	2.29407	2.0534	3.14547	2.51914	2.59796	1.58187	8.99006	3.55694	15.8029	13.3847	20.3947	2.15523	0	0
171282	Acot4	0.528571	0.09	0.12	0.23	0.46	0.4	0.52	0.47	1.43	4.5	3.69	4.14	2.86	1.42	3.04	0.74	2.3048	3.46167	4.5351	5.37819	4.27274	4.01241	4.67943	12.4176	5.69658	11.8018	12.2798	15.8931	6.73018	2.15752	1.51144
217700	Acot6	0.723441	0	0	0	0	0	0	0.21	0.69	0	0.63	0	0	0	0	0	0	0	0	0	0	1.32282	3.40053	1.81653	0	1.06161	0	1.67961	0	0	0
70025	Acot7	0.325874	0.75	0.49	0.46	0.41	0.45	0.34	0.21	0.35	0.34	0.3	0.46	0.82	0.41	0.38	0.52	26.7895	27.5212	15.267	11.7365	11.743	8.88557	9.37819	9.24382	10.0555	9.95501	11.7276	7.84391	14.7306	15.1553	9.71482
170789	Acot8	-0.080501	0.33	0.33	0.18	0.66	0.67	1.38	0.21	0.21	0.4	0.49	0.48	0.39	0.43	0.42	0.37	13.8459	16.6033	13.425	13.4561	16.9298	10.8509	9.87872	11.2169	9.53113	8.6028	11.1804	9.29402	8.45356	14.4026	11.9941
56360	Acot9	0.122292	0.07	0.05	0.05	0.05	0.05	0.07	0	0.07	0.09	0.17	0.07	0.12	0	0	0.01	5.46824	3.00196	4.80689	4.51504	2.72432	2.60612	2.85456	2.6246	2.77995	2.44397	2.04655	1.63968	1.41769	0	1.07627
11430	Acox1	0.828571	0.07	0.11	0.59	0.33	0.93	2.5	7.51	14.95	34.9	37.21	53.45	31.17	51.13	56.66	49.41	12.7672	13.0264	13.1105	22.8283	40.2152	60.9986	133.572	197.536	98.0212	161.091	137.222	434.589	169.792	305.752	296.369
93732	Acox2	0.931189	0	0	0.31	0.54	0.5	0.88	2.45	1.65	2.94	4.32	6.04	8.68	9.62	4.43	6.31	1.31457	2.69518	9.34238	18.3353	26.1367	30.3051	31.5802	22.5105	27.0243	32.3368	34.8235	39.0881	53.6095	55.5502	35.684
80911	Acox3	0.571003	0	0	0.02	0	0	0	0.03	0.01	0.17	0.05	0.08	0.1	0.09	0.18	0.27	1.77002	1.69755	0	1.74864	2.39891	1.81824	2.01963	3.11043	2.49245	2.34395	1.63473	2.08495	2.96267	5.15076	3.55326
11431	Acp1	-0.185577	0	0	0	0	0	0	0	0	0	0	0	0	3.43	0	0	62.7942	39.394	65.3866	59.1506	35.0352	35.5894	24.8787	27.7121	28.7347	22.5456	24.2206	19.8856	22.6095	9.05551	15.5864
11432	Acp2	0.446828	0	0.22	0.38	0.15	0.12	0.2	0.06	0.1	0.53	0.6	0.91	0.34	0.18	0.06	0.08	5.53887	5.32716	5.75735	7.0798	6.61798	6.772	9.21309	10.7512	11.9072	13.9113	11.1027	11.0873	10.3128	10.0371	9.38644
11433	Acp5	-0.729223	0.56	0.55	0.63	0.53	0.36	0.63	0.62	1.15	2.31	1.09	2.45	1.83	0.7	0.71	1.18	133.559	158.652	173.264	144.497	170.056	135.2	87.2567	48.0101	73.7007	62.2024	61.2512	48.5125	46.1807	116.491	71.3591
66659	Acp6	0.87042	0.04	0.12	0.05	0.07	0.05	0.08	0.17	0.28	0.73	1.56	1.2	2.65	1.03	0.92	0.98	7.73515	9.18309	6.5879	7.49997	8.59967	9.67695	9.2471	10.3125	9.16973	10.5657	11.9824	15.5788	14.1769	13.976	12.3008
264895	Acsf2	0.942857	0.06	0.23	0.38	0.58	0.41	0.5	0.67	1.39	3.87	7.09	10.87	15.04	15.22	23.03	31.06	4.43767	5.66588	4.54732	5.7466	7.93983	5.17231	6.66195	15.195	19.1	25.7563	23.7261	32.1872	25.4712	61.7394	37.0911
257633	Acsf3	0.66189	0	0.04	0.05	0	0	0.05	0.08	0.24	0.18	0.14	0.19	0.89	1.17	0.46	0.37	7.24166	10.8834	6.368	6.4574	8.73942	8.46581	8.31217	8.04184	10.8629	10.9568	12.9803	10.9894	12.952	16.7022	9.88354
14081	Acsl1	0.728571	1.08	1.45	4.71	4.48	6.54	14.98	25.83	44.21	96.1	85.53	92.37	98.49	59.27	54.05	69.58	23.0124	27.4031	40.1771	55.9463	82.7208	124.225	173.746	187.502	109.123	204.994	167.635	239.741	89.3556	135.15	61.592
74205	Acsl3	0.569392	0.07	0.12	0.1	0.06	0.15	0.13	0.15	0.03	0.03	0.07	0.06	0.06	0.18	0.02	0.07	11.9469	6.1839	11.2956	11.7961	5.46776	10.1267	9.06299	3.32183	3.70295	5.3326	5.8163	7.20094	12.9699	2.58234	6.81987
50790	Acsl4	-0.0448032	0.11	0.09	0.15	0.15	0.19	0.19	0.36	0.22	0.18	0.18	0.22	0.12	0.32	0.25	0.48	6.56617	3.13328	6.80363	7.78075	3.43942	6.85683	5.09862	6.30531	6.81792	6.53164	4.59554	5.62617	11.6154	4.13211	5.8024
433256	Acsl5	0.664286	0.23	0.4	0.95	1.41	1.72	4.36	9.73	11.19	26.06	29.2	30.67	26.07	25.77	26.05	22.92	45.5915	38.8091	52.0452	54.012	45.3757	60.7907	93.8195	114.833	69.4825	100.739	87.7082	101.269	69.0691	60.6445	44.8432
117147	Acsm1	0.886102	0	0	0.17	0.2	0	1.69	4.01	3.99	16.67	46.56	51.65	71.45	52.55	60.38	48.67	0	0	1.15555	4.94334	9.5656	28.8828	52.4867	41.8875	71.2081	80.3141	56.3549	61.489	111.999	150.005	120.235
20216	Acsm3	0.963606	0	0	0	0	0	0.02	0.06	0.24	0.71	1.09	2.48	2.78	2.88	1.6	1.89	0	0	0	1.56769	1.62161	4.0808	6.06965	6.68804	5.59971	10.1276	10.6179	19.9369	20.4824	8.01336	9.76812
272428	Acsm5	0.904624	0	0	0	0	0	0	0	0	0	0.12	0.52	1.92	3.81	3.95	4.94	0	0	0	0	0	0	0	1.87607	4.55489	11.9386	13.703	17.5553	25.6753	19.6642	16.4389
68738	Acss1	0.603061	0.69	1.08	1.33	1.47	1.92	1.9	1.83	1.9	2.29	1.31	1.2	0.2	0	0	0	30.3656	31.4445	36.5735	39.175	32.6872	30.1733	20.6545	8.84375	10.3585	5.06198	4.15194	1.05692	0	0	0
60525	Acss2	0.51832	0.15	0.19	0.41	0.25	0.31	0.46	1.7	1.1	1.07	0.25	0.4	0.28	3.93	5.31	4.56	12.9327	12.2836	13.4608	15.1336	16.1547	21.8413	30.5756	3.81886	3.89527	4.5482	4.23266	2.41482	52.4647	47.8261	28.2128
380660	Acss3	0.76529	0	0	0	0	0	0	0	0	0	0.14	0.16	1.86	0.96	1.77	0.07	0	0	0	0	0	0	0	0	0	3.58816	3.16089	6.11165	4.29714	0	0
11461	Actb	-0.357143	397.8	335.91	348.08	326.96	320.44	406.97	518.03	510.84	701.53	773.87	815.18	637.58	463.46	353.8	302.28	661.657	797.883	556.843	533.592	566.223	505.398	469.717	475.606	510.683	409.42	374.726	168.812	289.175	351.044	289.164
11465	Actg1	-0.271429	396.38	333.97	343.34	326.18	319.53	405.44	515.84	506.31	693.03	762.62	801.54	629.1	460.05	351.53	297.66	545.863	543.09	354.747	349.125	349.662	275.323	220.201	257.876	266.764	248.497	252.842	86.4802	114.369	45.9899	48.0304
56456	Actl6a	0.935714	2.24	1.74	1.62	1.33	1.54	1.25	1.13	0.78	0.99	0.59	0.91	0.53	0.41	0.38	0.45	52.4404	45.9554	45.9818	41.0467	30.3453	21.6072	18.0017	19.4915	18.9399	14.2629	13.2559	6.83579	10.2689	7.74176	7.85174
109711	Actn1	0.0285714	5.13	3.61	4.02	3.82	3.86	6.3	7.74	7.23	10.63	10.49	14.67	12.47	10.93	5.89	6.57	22.0932	22.5277	16.9561	17.6808	22.9722	15.8664	18.8692	18.0086	24.2746	25.1445	18.9469	17.7465	8.59613	8.16712	6.92456
60595	Actn4	-0.607686	6.64	5.33	6.36	5.22	5.38	8.34	9.7	11.13	15.84	13.66	19.72	18.12	15.6	11.19	11.19	70.3863	98.1101	66.1792	68.4409	89.6932	48.591	44.7717	47.7282	59.2076	51.1912	53.6377	39.7076	45.67	40.9755	32.7525
56444	Actr10	-0.122639	0.09	0.1	0.14	0.06	0.17	0.11	0.14	0	0.12	0.08	0	0.16	0	0	0.34	12.001	10.6955	10.1545	9.80228	9.48451	7.74643	6.19733	7.30517	7.688	8.15707	8.17294	7.69116	7.98312	7.63653	6.11844
54130	Actr1a	0.0948123	1.14	0.73	0.78	0.72	0.59	0.87	0.69	0.65	0.87	0.55	0.95	0.82	1.07	0.93	0.55	46.0916	55.4806	41.5248	33.5064	39.0106	28.5017	24.0563	25.4949	24.6672	20.6215	20.9282	16.0961	19.9733	25.4148	18.7425
226977	Actr1b	-0.128686	0.54	0.47	0.41	0.44	0.3	0.66	0.5	0.39	0.59	0.5	0.7	0.88	1.1	0.38	0.37	28.3252	31.6893	23.9394	19.8342	19.8479	16.1024	15.216	15.8884	22.3485	20.6312	19.124	16.5786	21.441	24.4549	20.2552
66713	Actr2	-0.173369	4.1	3.57	3.57	3.19	4.09	4.77	6.95	5.49	10.86	11.94	14.66	9.01	8.85	7.93	7.24	37.9432	14.9226	32.7065	32.1012	13.1036	23.1944	23.2056	24.8681	23.7866	25.548	22.3237	18.7865	18.6797	7.51952	16.7585
74117	Actr3	-0.414286	6.39	6.48	5.57	4.97	3.61	5.61	11.05	7.76	9.25	12.46	9.69	8.78	8.03	5.89	5.93	75.9988	62.7047	65.8052	64.4609	58.89	56.4803	54.0546	55.44	55.5805	49.5891	42.0983	32.6555	29.2096	18.033	19.3983
109275	Actr5	0.694365	0.01	0.01	0.01	0	0	0	0	0	0	0	0	0	0	0	0	7.37987	8.84518	6.15824	4.64256	5.08697	3.7247	3.25851	3.63909	2.75479	3.06892	2.83315	3.00358	2.92761	3.31184	2.17117
56249	Actr8	0.585571	0.01	0.05	0	0	0	0	0	0	0	0	0	0	0	0	0	12.1018	11.2674	11.0798	9.10402	7.98861	8.53567	7.5771	7.61427	7.57267	7.37435	5.92129	7.93088	6.87387	7.35689	7.31102
109652	Acy1	0.412869	0.41	0.66	0.72	0.86	0.66	1.37	1.94	2.57	4.21	2.47	4.05	3.65	6.79	3.23	2.67	15.8424	22.7657	15.5152	17.1451	21.4102	16.0489	15.9115	18.0105	21.2708	19.7124	24.3206	20.0338	31.8494	18.1128	10.6637
71670	Acy3	0.896429	0.03	0.07	0.13	0.16	0.21	0.2	0.28	0.4	0.72	1.26	1.95	4.13	6.05	4.94	5	5.82722	9.69428	6.76171	8.09879	9.28255	7.26314	7.39367	12.4979	17.3776	24.6781	32.1096	20.9029	34.9777	59.9499	31.3488
66204	Acyp1	0.287757	1.77	1.47	1.38	0.92	1.41	1.49	1.66	0.98	1.55	1.5	1.28	0.66	0.98	1.09	0.93	29.264	27.1391	28.161	24.672	16.463	16.3968	13.9298	7.38426	6.83962	5.14328	4.36331	5.22663	6.56	9.43313	7.03647
11486	Ada	0.462847	0.17	0.19	0.08	0.07	0.12	0.08	0.11	0.18	1.55	0.27	0.23	0.05	0	0.05	0.03	3.56113	5.75369	2.56066	2.32958	2.32408	1.94467	1.6956	1.92367	2.15848	1.42733	1.60657	1.28022	1.05593	0	0
11487	Adam10	0.935714	0.66	0.51	0.49	0.65	0.61	0.35	0.24	0.15	0.42	0.25	0.22	0.06	0.12	0	0.03	47.5607	24.6999	46.8077	47.826	26.4831	29.0861	18.1679	15.5984	19.3697	14.4971	11.4715	7.09563	5.22175	2.2654	3.18373
11491	Adam17	0.510556	0.01	0.01	0.01	0.01	0.01	0.01	0	0	0.03	0.01	0.02	0	0	0	0.01	9.51808	5.5195	8.32146	7.27281	4.86893	5.07319	4.78897	5.1808	5.65599	6.6646	4.88725	3.49177	4.1085	2.00454	3.31646
216991	Adap2	0.211289	0	0	0	0	0	0	0	0	0	0	0	0.03	0.02	0	0	0	1.24884	2.15948	3.02066	2.62503	4.151	4.40735	5.56465	5.73758	7.83148	9.38041	4.63363	7.61794	4.88732	6.5566
56417	Adar	-0.0771517	0.01	0	0	0	0	0	0.01	0	0	0	0.01	0	0	0	0	4.5121	7.31833	7.63799	4.64784	5.12695	6.41956	12.7381	6.96082	5.81761	4.75499	3.76118	3.21363	3.47213	4.99995	4.79902
66757	Adat2	0.433013	0	0.07	0	0	0	0	0	0	0	0	0	0	0	0	0	3.61325	4.38406	3.32037	2.52599	2.70613	2.09657	1.37406	2.44789	1.53983	1.7619	1.43009	1.85845	1.41178	1.11241	0
72113	Adck1	0.357512	0	0	0	0.01	0	0	0	0	0	0.09	0	0.06	0	0.05	0	3.73241	3.98966	2.3142	2.74065	2.89965	2.44963	1.65911	3.42267	2.38892	3.71492	2.23912	3.42238	4.34218	4.75459	2.70483
268822	Adck5	0.604367	0	0	0	0	0	0	0	0	0	0.02	0.08	0.22	0.15	0.04	0.26	14.3032	16.8089	11.2428	10.7346	11.3042	11.695	15.848	18.1905	12.0561	14.0897	15.8224	16.145	18.2606	44.2605	21.0481
11518	Add1	0.675	3.61	3.48	3.1	2.83	2.61	2.85	1.66	1.18	1.38	1.79	1.27	0.65	0.71	0.61	0.43	60.3779	90.5146	56.0529	51.2577	105.999	77.016	79.6685	60.7105	28.2438	20.5012	23.6087	26.5663	7.87352	15.4827	9.92171
11519	Add2	0.976188	1.38	1.61	1.44	1.03	1.31	0.92	0.51	0.19	0.17	0.13	0	0	0	0	0	76.5961	86.8221	79.3176	69.5732	76.6281	38.5907	22.7357	14.2246	23.6404	6.81236	5.17887	0	0	0	0
27360	Add3	0.663685	0.47	0.57	0.51	0.54	0.37	0.45	0.54	0.56	0.5	0.29	0.35	0.21	0.07	0.08	0.09	11.4863	11.7843	11.3556	10.5834	7.96044	9.22748	6.85608	4.78757	6.50313	7.62046	4.74416	5.26891	2.43171	0	0
13733	Adgre1	0.731031	0	0	0.06	0.09	0.1	0.07	0.04	0.02	0.04	0.19	0.21	0	0	0	0	5.53551	6.85639	8.94339	10.5006	12.9348	12.5346	13.374	11.7888	14.2254	20.8143	9.07508	5.77468	4.86734	5.98244	2.53235
26364	Adgre5	0.575492	0	0.01	0.26	0.02	0.02	0.05	0.05	0.03	0.07	0.05	0.04	0	0	0	0	5.84584	8.09758	6.73704	8.21219	14.3711	9.8874	11.1114	16.3303	16.8691	18.3678	12.8381	10.8024	7.52261	6.33286	5.59868
14766	Adgrg1	0.590624	0.03	0.03	0	0	0	0	0	0	0	0	0	0	0	0	0	49.1986	60.4729	43.5315	36.3172	35.8095	18.2564	19.5555	20.3125	17.4243	14.8291	13.2216	9.08629	1.92828	0	0
99633	Adgrl2	0	0	0	0	0	0	0	0	0	0	0	0	0	0.03	0	0	2.93886	1.85601	1.62158	1.60213	2.04994	2.86407	2.75791	3.09194	4.65541	5.98468	4.42584	3.717	3.08495	4.02671	5.46769
11522	Adh1	0.959786	0	0	0.78	0.72	3.65	32.73	74.53	60.48	98.06	112.32	152.18	447.45	1328.44	1174.72	1009.08	5.51893	3.96521	5.80094	17.1297	68.9239	257.54	519.874	203.324	226.559	361.572	372.146	699.022	1573.35	1253.99	799.298
26876	Adh4	0.789131	0	0	0	0	0	0	0	0	0	0	0	0	0.1	0.69	2.12	0	0	0	0	0	0	0	0	0	1.96454	2.45257	5.38483	20.3557	40.6723	54.1054
11532	Adh5	0.853571	3.14	3.1	5.01	5.99	7.4	15.07	29.51	34.64	52.98	46.73	57.34	75.27	87.85	85.17	94.17	46.0003	45.8001	44.8333	56.5527	93.3217	115.555	106.699	91.2396	80.6717	102.684	139.283	132.984	153.659	140.828	124.881
76187	Adhfe1	0.959454	0	0	0.02	0	0	0.15	0.25	0.61	1.11	1.81	2.86	6.44	3.49	2.07	1.87	0	0	1.29664	2.64662	4.097	9.43263	10.644	11.3552	15.4189	23.1203	27.4471	31.7015	30.823	17.8552	21.9108
104923	Adi1	0.878571	0.74	0.47	1.09	0.84	1	2.04	3.66	2.41	3.79	4.21	6.96	7.24	4.19	3.93	3.3	15.4008	19.0441	15.4844	20.8356	27.1327	20.2821	23.0902	35.3901	47.5607	66.2088	59.3636	72.5797	47.1646	73.1228	38.3114
11534	Adk	0.982143	4.63	5.07	7.59	9	10.99	17.27	28.54	38.25	71.95	62.21	85.16	113.91	223.17	156.7	134.84	49.5932	38.1206	50.804	58.4745	56.4244	71.4876	78.7697	75.2083	90.6476	94.3503	111.371	140.948	267.007	160.073	207.095
11538	Adnp	0.876135	0.24	0.19	0.14	0.1	0.09	0.07	0.07	0.06	0.04	0.08	0.04	0.03	0.04	0	0	23.0034	15.5448	19.356	17.8157	13.499	13.8009	9.44344	10.3177	10.7361	11.8978	9.5333	10.9251	6.08391	3.68496	4.26987
211488	Ado	0.0449245	0.11	0.19	0.16	0.08	0.07	0.07	0.13	0.08	0.38	0.16	0.15	0.4	0.22	0.13	0.13	6.28647	6.42082	5.52135	4.98831	3.79863	3.45915	3.51209	3.8744	3.74401	3.78019	3.68856	3.5273	3.80832	3.57551	2.81768
72141	Adpgk	0.203571	0.24	0.22	0.34	0.38	0.36	0.65	0.76	0.5	0.74	0.69	0.9	0.66	0.37	0.47	0.28	13.9162	12.9582	12.1088	14.577	18.5929	22.9008	20.0303	18.4664	13.2995	14.1665	11.0476	5.53083	7.60652	6.7817	5.37203
11544	Adprh	0.81077	1.7	1	0.68	0.73	0.59	0.5	0.45	0.59	0.75	0.71	0.47	0.18	0	0	0	38.6074	46.0753	30.2216	27.0198	33.1116	17.9365	15.4805	11.583	15.7122	13.3736	14.4638	6.75539	5.87865	9.88952	5.6678
100206	Adprhl2	0.328571	0.37	0.19	0.34	0.21	0.25	0.24	0.58	0.86	1.28	1.17	1.77	1.96	0.82	0	0.39	23.2365	26.6083	20.2487	19.3463	19.7991	19.413	18.1478	25.3112	19.6358	22.9141	22.0474	30.3624	11.9542	11.1919	8.64276
66358	Adprm	0.185577	0	0	0	0	0	0	0	0	0	0	0	0	0	0	0.05	6.3824	4.26931	3.86273	3.82136	3.48011	4.21767	5.33963	4.80932	4.26349	7.11571	4.55087	7.68029	6.85106	4.52766	5.41025
56436	Adrm1	0.00714286	0.94	0.92	0.9	0.8	0.62	0.69	0.82	0.73	0.89	1.07	0.97	1.38	2.06	0.76	2.73	58.2296	92.3196	46.468	40.2091	41.9644	26.0012	23.3972	62.9681	27.2103	25.7733	29.3278	28.8856	52.2444	45.7262	41.182
11564	Adsl	-0.00178891	1.69	1.61	1.64	1.05	0.83	1.23	1.25	1.43	1.14	1.64	2.09	1.56	2.06	1.43	1.33	21.5858	22.9461	14.9243	12.071	11.2333	6.64471	6.01554	7.30024	7.7694	6.57811	7.33357	4.33519	5.1926	5.30175	3.80206
11566	Adss	0.538462	1.67	1.68	1.32	0.62	0.99	1.07	0.69	0.69	1.07	1.29	0.78	0.74	1.13	0.44	1.08	14.655	9.7321	11.7902	10.9282	6.79416	8.72241	6.50499	7.2563	6.70621	8.00273	7.32482	5.82189	5.56636	5.37742	7.69209
11565	Adssl1	0.328865	0	0.05	0.13	0.43	0.14	0.11	0.34	0.12	0.33	0.21	0.31	0.38	0.92	0.43	0.53	3.56972	5.65471	4.98318	8.35608	11.3518	8.4489	9.93727	10.2216	7.50805	6.72949	5.47213	6.57375	10.9073	8.80186	6.4194
11568	Aebp1	-0.0619143	0	0	0	0	0	0	0	0.01	0	0	0	0	0	0	0	6.1641	6.60616	4.68155	5.46483	6.20548	3.76766	1.88492	3.38756	4.82445	4.82855	2.83541	2.55588	1.29584	0	0
17356	Afdn	0.188004	0.12	0.05	0.03	0.02	0.02	0.04	0.46	0.11	0.15	0.17	0.18	0.13	0.11	0.18	0.2	6.75225	5.61052	4.22942	2.23119	2.98958	2.24705	2.59871	5.6066	2.72605	3.64085	3.63054	11.124	4.23426	3.70723	11.1179
215951	Afg1l	0.247436	0	0	0	0	0	0	0	0	0	0	0	0	0	0	0.21	2.0249	1.55372	1.61222	1.51539	1.40504	1.7295	1.78718	1.17153	2.21612	1.90119	2.7158	2.52574	2.67874	3.15119	2.54348
114896	Afg3l1	0.141961	0.04	0.03	0.04	0.02	0	0	0	0.02	0.21	0.15	0.14	0.23	0.31	0.05	0.14	18.4806	22.7147	16.2255	17.0209	16.0929	10.6264	11.1451	13.6349	16.8764	15.2734	13.7831	14.3904	15.5607	18.603	11.376
69597	Afg3l2	-0.697676	0.23	0.28	0.28	0.2	0.2	0.24	0.4	0.42	1.07	1.03	1.11	1.1	0.8	1.01	1.04	42.0596	37.2311	40.564	36.9075	34.4797	30.6615	24.2786	26.2663	27.0215	24.3335	25.1608	23.924	25.0663	18.5478	15.0549
280662	Afm	0.448632	0	0	0	0	0	0	0	0	0	0	0.08	0.1	0.05	0.14	0.29	7.31698	4.57552	11.5915	20.6969	18.7422	44.8146	38.5311	47.0358	136.056	147.082	128.834	122.079	111.967	67.0179	48.0532
71562	Afmid	0.884721	0	0	0.02	0.04	0	0	0.14	0.27	0.69	1.04	2.2	4.3	4.64	4.33	1.57	4.17476	6.63021	6.33971	8.33776	12.6117	11.5241	16.6522	22.592	31.9997	29.9243	38.1695	26.1294	53.1848	40.9608	18.3474
11576	Afp	0.71685	87.06	75.9	92.57	105.17	101.69	200.55	131.82	93.49	66.4	103.45	51.84	1.45	0	0	0	3449.49	2810.29	5215.61	7453.61	7520.47	10538	9234.28	7129.35	12419.4	10276.1	8549.36	2335.95	40.678	31.6584	33.4977
216549	Aftph	0.196936	0.04	0.19	0.01	0.02	0.01	0	0.01	0	0.04	0	0.02	0	0	0	0	9.0777	3.4266	8.16764	7.21723	3.6939	6.06767	4.58894	5.50456	4.69696	4.32655	4.27342	3.86055	4.12343	2.036	4.57571
11593	Aga	0.847944	0.14	0	0.13	0.14	0.45	0.12	0.29	0.43	0.61	0.43	1.09	0.63	0.26	0.22	0.05	6.18425	4.68693	6.15876	7.32683	8.37791	8.08596	9.50887	8.82584	10.5605	12.9595	12.0172	13.0485	10.4065	7.66182	7.50992
15463	Agfg1	0.819322	0.76	0.75	0.5	0.56	0.28	0.26	0.43	0.25	0.31	0.24	0.26	0.27	0.27	0.17	0.08	52.8705	35.7975	47.6762	47.841	36.7446	29.2037	14.7024	8.7253	13.548	8.38019	6.89429	3.38771	3.68941	2.46251	2.64057
231801	Agfg2	-0.200358	0.12	0.08	0.16	0.19	0	0.09	0.21	0.25	0.11	0.27	0.37	0.35	0.22	0	0.12	25.3315	27.6439	25.8937	24.4867	24.9958	16.2119	15.6114	19.3582	19.4532	17.7103	18.5599	10.9081	20.3092	9.032	8.0002
69923	Agk	-0.410714	0.09	0.08	0.14	0.18	0.15	0.21	0.24	0.43	0.93	1.94	1.25	1.61	0.7	0.64	0.36	7.58789	7.3738	7.16923	5.99824	4.5879	3.74418	3.86179	3.95161	4.79098	4.10839	4.46739	4.92915	3.88818	2.83334	1.4683
77559	Agl	0.0196604	0.08	0.08	0.27	0.24	0.25	0.69	1.06	1.07	1.7	1.93	2.23	2.74	4.83	5.4	5.68	3.11538	3.03662	2.17101	3.89672	6.29037	15.4863	8.40795	4.52406	5.8164	6.5628	6.41833	5.04163	5.85704	2.69101	2.19707
75986	Agmat	0.893283	0	0	0.07	0	0.12	0.24	0.24	0.99	2.57	3.37	4.18	9.8	6.74	8.91	6.08	9.67035	14.9999	11.9271	14.3463	18.9703	18.2734	30.3208	76.7715	77.969	99.6499	111.787	93.8691	137.142	115.305	73.3912
319660	Agmo	0.779276	0	0	0	0	0	0	0	0.24	0.53	0.48	1.03	0.52	0.62	0.45	0.66	2.12181	2.03228	2.93947	4.18661	2.47296	2.84444	4.33525	12.1675	12.0343	16.3068	12.2874	25.3839	15.2274	7.79353	7.57343
236511	Ago1	-0.264207	0	0	0.01	0	0	0	0	0	0.03	0.19	0	0.05	0.03	0	0.04	6.97083	5.82641	5.0807	4.5631	4.66385	3.77368	3.50204	3.33261	2.93165	3.87682	2.73112	3.34398	2.76954	1.90522	1.74524
239528	Ago2	0.397138	0.19	0.37	0.28	0.31	0.32	0.27	0.34	0.21	0.31	0.25	0.45	0.34	0.16	0.08	0.11	15.6451	15.2136	16.2163	16.117	17.3859	14.3298	8.86054	6.24835	7.52132	4.32284	3.72168	2.27624	1.33576	0	1.01459
55979	Agpat1	0.371154	0.07	0	0	0	0	0	0	0	0	0	0	0	0	0	0	32.5457	35.242	28.9007	21.2293	20.4728	17.8172	14.5292	11.7793	8.37617	7.09704	8.5291	4.59391	3.57856	3.03528	3.39712
67512	Agpat2	0.775693	0	0	0.07	0.06	0.05	0.16	0.5	0.61	1.09	2.71	3.83	3.22	5.96	2.47	2.57	12.0105	18.0668	16.1579	20.854	33.6976	31.0447	55.582	78.4366	84.4892	89.279	103.903	75.3887	77.7295	200.686	110.321
28169	Agpat3	0.882932	0	0	0.12	0.08	0.09	0.35	0.59	0.96	3	4.9	5.6	3.87	1.22	0.98	0.87	5.2629	12.6535	11.4832	15.3862	24.6142	24.4382	34.6387	66.7155	38.2964	53.1918	45.4154	68.2826	42.8221	39.4703	35.215
68262	Agpat4	0.462013	0.02	0	0	0.06	0.02	0	0	0	0	0	0	0	0	0	0	18.5778	23.4372	20.7043	18.2928	17.1493	15.8144	9.29162	5.75603	6.35313	2.06474	2.49728	1.58872	0	0	0
52123	Agpat5	-0.0620811	0	0	0	0	0	0	0	0	0.24	0	0	0	0	0	0	4.56972	3.83577	3.67344	2.90093	2.32771	2.93167	1.93998	2.10656	1.77487	1.17959	1.36727	0	1.37963	0	0
228061	Agps	0.684589	0.25	0.22	0.29	0.21	0.16	0.23	0.23	0.09	0.3	0.22	0.24	0.07	0.02	0	0	6.23868	5.22006	5.71074	5.05905	3.93348	4.12287	3.62204	3.09177	3.24729	2.72498	1.42089	1.15262	1.03303	0	0
11603	Agrn	-0.105236	0.01	0.03	0	0	0	0	0.02	0	0	0	0	0.01	0	0.16	0.01	16.7053	16.453	12.3507	10.9953	9.07917	7.54522	9.02759	7.3502	8.97687	10.1248	8.31987	7.21035	5.42626	4.23727	4.75398
11606	Agt	0.920465	0	0.04	0.14	0.17	0	0.31	0.36	0.58	2.44	2.85	3.46	1.76	0.71	0.37	0.22	17.0336	34.6397	42.3981	80.787	185.401	173.723	236.574	511.567	804.828	831.584	879.567	1008.2	773.062	429.561	280.035
11611	Agxt	0.811439	0	0	0.1	0.04	0.29	0.69	1.38	4.06	22.17	36.3	42.12	98.07	57.23	31.2	15.22	3.15992	3.76801	3.47489	7.46196	13.3832	17.2149	39.8443	315.377	298.982	237.979	258.451	142.144	400.608	221.882	144.567
268782	Agxt2	0.949062	0	0	0.26	0.29	0.47	1.03	1.28	1.88	3.34	8.65	11.82	19.83	14.79	13.44	11.59	4.91187	4.89598	7.76551	11.4044	9.54173	16.575	15.8063	21.978	34.926	44.558	51.0708	54.605	55.0122	30.6475	41.4664
226747	Ahctf1	0.652921	0.19	0.11	0.09	0.07	0.07	0.04	0.03	0.03	0.05	0.05	0.09	0.04	0.01	0	0.02	17.0868	12.5881	16.9082	16.4436	9.5857	10.332	6.03881	11.1058	9.96072	7.68433	5.42082	8.56354	8.48838	2.52231	3.41319
269378	Ahcy	0.910714	8.22	9.03	11.48	10.86	14.9	30.05	47.08	106.19	162.73	95.74	150.59	194.15	397.15	491.33	479.69	76.6285	95.3867	59.4605	77.1204	102.795	104.713	155.513	202.658	105.339	131.862	145.88	208.188	850.933	570.492	359.174
229709	Ahcyl1	-0.410714	4.81	31.57	23.57	12.08	0.65	13.58	13.95	25.33	39.92	13.28	36.44	21.53	23.06	22.36	22.31	24.525	20.9454	23.3961	22.0689	18.5615	18.0325	16.3452	14.8211	16.2493	17.2665	17.5647	16.2999	16.0057	15.1855	16.7253
74340	Ahcyl2	-0.327941	0.32	0.53	0.59	0.5	0.45	0.74	0.85	2.27	0	1.79	3.53	2.21	5.15	6.16	5.63	3.52975	3.03139	4.12573	3.69888	2.86024	2.03514	0	0	1.87396	1.45891	1.16282	0	0	4.04019	2.84019
66395	Ahnak	0.644746	0.21	0.14	0.16	0.12	0.14	0.31	0.5	0.57	0.55	0.56	0.62	0.52	0.3	0.25	0.24	1.25461	0	0	1.14464	1.53758	1.61853	1.45496	1.64505	1.66614	1.88627	1.41248	1.64915	1.45679	0	0
217737	Ahsa1	0.0107143	9.06	5.39	4.79	3.56	3.94	3.53	4.2	4.23	6.2	4.97	5.38	4.02	3.65	3.17	3.04	143.045	141.777	117.943	93.5724	80.272	63.3972	57.9119	53.5595	55.1921	48.8856	51.4221	47.4224	56.3389	68.9231	60.256
268390	Ahsa2	0.362577	0.15	0.18	0.07	0.1	0.21	0	0.04	0	0	0	0	0	0	0	0.1	15.7806	9.48716	13.1051	13.3319	7.20261	11.5911	11.1598	8.46186	8.71029	8.51669	9.61264	9.43955	9.27395	6.46889	10.517
11625	Ahsg	0.964286	0.05	0.11	2.05	2.58	3.4	15.67	12.23	15.94	19.06	36.67	35.38	32.87	13.36	11.59	4.14	299.256	391.209	754.179	1698.95	4678.08	7542.36	13958.3	18121.2	20267.6	20562.7	19784.2	24660.4	13678.7	7008.55	4247.35
98870	AI182371	0.591608	0	0	0	0	0	0	0	0	0	0	0	0	0.08	0	0.73	2.89586	3.0822	7.79165	13.9166	17.0856	26.6629	31.1172	29.9308	40.4477	66.2112	59.3016	69.0832	84.4141	62.3653	91.5368
224833	AI661453	0.061859	0	0	0	0	0	0	0	0	0	0	0	0	0	0	0.07	0	1.28562	1.2617	2.19869	4.04939	3.41171	5.4684	4.18789	3.69108	4.11945	3.43895	3.29801	2.9661	8.31091	3.64568
107242	AI837181	-0.484747	0.08	0.14	0.1	0.11	0.08	0.16	0.14	0.13	0.26	0.19	0.24	0.44	0.24	0.14	0.12	17.573	27.3661	17.0316	16.5045	20.8862	12.3013	13.5798	17.9196	14.4943	14.5163	13.8243	14.5617	13.4459	20.2997	13.4941
11629	Aif1	0.786313	0	0	0	0.33	0.16	0	0.61	0.53	1.36	2.86	3.29	1.24	0.46	0	0.33	4.03934	2.93414	6.7107	8.64056	5.92767	8.4043	14.2935	17.6637	14.0942	16.0122	13.8567	10.3593	7.2264	5.66754	4.708
26926	Aifm1	0.557143	1.12	1.11	1.66	1.44	1.84	2.91	4.04	4.5	8.96	8.25	13.25	18.15	24.53	15.22	15.49	29.3258	19.6347	23.5249	24.8856	17.8744	22.1878	20.5934	20.4907	27.2359	33.4126	39.5878	32.9438	47.7418	23.2387	26.6184
71361	Aifm2	0.815849	0	0	0	0	0	0	0.07	0	0.3	0.3	0.71	0.94	0.27	0.44	0.47	1.78467	2.19802	1.49338	1.33561	3.49444	3.40415	3.78451	4.70104	4.63995	5.97232	7.08437	10.6897	10.9606	6.46555	5.94656
13722	Aimp1	0.103571	2.31	2.01	2.1	1.46	1.29	1.11	1.58	1.85	2.27	2.21	2.15	2.39	1.38	1.7	1.34	66.6887	56.8702	57.7924	43.6618	30.6481	34.4115	29.0327	31.7122	28.5302	22.0292	25.8233	25.4967	21.0891	16.4792	19.5932
231872	Aimp2	0.39857	1.19	0.81	0.72	0.64	0.69	0.7	0.7	0.4	0.89	0.6	0.71	0.63	0.51	0.35	0.73	35.1906	42.8509	29.0152	22.7537	22.1866	16.0671	11.5148	11.1397	12.0088	8.10879	10.3591	5.82625	6.95992	12.293	5.73334
11632	Aip	-0.0679178	0.59	0.6	0.58	0.28	0.35	0.3	0.42	0.17	0.4	0.57	0.76	0.6	0.46	0.45	0.23	12.1591	17.9932	10.807	11.6388	11.4897	10.0321	11.2618	9.49112	10.6908	8.81417	8.82764	7.59594	8.19229	10.1031	9.5969
11637	Ak2	0.4	8.31	7.76	6.59	6.91	7.97	7.3	9.11	23.29	49.15	73.57	77.87	158.53	108.09	116.65	85.4	108.424	127.549	95.0033	82.8924	73.8529	69.566	69.769	201.217	90.4219	180.816	199.786	262.889	98.7964	114.518	67.8937
56248	Ak3	0.889286	0.9	0.66	1.22	1.19	1.44	3.43	3.74	4.58	7.83	8.95	13.43	20.03	26.09	40.87	35.1	23.7122	25.6658	23.5075	22.0408	21.7965	26.4897	28.7189	25.235	31.3641	39.1855	37.0413	57.9555	67.7247	86.1174	61.3375
11639	Ak4	0.514286	1.14	1.52	1.53	2.6	1.67	2.89	4.62	4.41	6.86	6.5	8.15	5.22	1.94	7.39	4.28	6.60309	4.49779	7.45353	9.70502	12.9353	14.9176	10.9984	14.4312	15.339	18.0136	8.9253	32.8118	3.35703	8.52309	6.08257
11640	Akap1	0.586763	0	0.04	0.02	0.08	0	0.18	0.25	0.12	0.35	0.22	0.23	0.26	0.25	0.21	0.32	11.0125	13.4466	9.65958	9.71198	10.5192	10.0147	13.1831	21.1732	14.8466	18.8005	16.2002	22.8866	19.0225	22.3944	20.8324
56697	Akap10	0.176149	0	0.02	0	0	0	0.01	0	0	0.05	0	0	0	0	0	0	4.31912	3.71485	4.68709	4.35226	3.37447	3.26054	2.8719	2.34663	2.2118	2.05934	1.90592	1.20361	1.30938	1.00259	0
83397	Akap12	0.62411	0.13	0.12	0.13	0.11	0.07	0.14	0.07	0.13	0.17	0.14	0.16	0.1	0.04	0	0	4.6459	2.89214	2.98415	2.95968	2.337	2.7023	3.02215	3.31084	3.04274	3.6904	2.26178	1.27385	1.15404	0	0
75547	Akap13	-0.0167487	0	0.03	0.04	0.03	0	0.01	0	0	0.02	0.01	0.01	0.02	0.03	0	0.01	1.48954	2.17999	1.39664	1.38809	1.40415	1.58722	2.02397	1.16457	1.53072	1.21153	1.06278	0	0	0	0
56399	Akap8	0.737892	0.35	0.4	0.23	0.11	0.14	0.21	0	0.05	0.11	0	0.08	0.06	0	0.02	0.02	30.3483	17.9159	25.947	22.4272	12.1847	16.3736	13.3107	14.5067	11.3382	9.97893	11.667	11.993	8.98236	2.63776	7.23021
54194	Akap8l	0.627371	0.01	0.04	0	0.05	0	0.01	0.01	0.02	0	0	0	0	0	0	0	20.2982	14.6915	16.1407	18.287	14.1909	18.3751	16.1743	14.1957	10.9923	10.058	11.0915	18.0375	13.66	6.26142	12.0798
100986	Akap9	0.640997	0.02	0.01	0.01	0.01	0	0.01	0.01	0.02	0.05	0.04	0.01	0.01	0	0	0	2.34328	0	2.89098	2.12538	1.26526	2.79269	2.00793	2.78553	2.97357	2.2826	1.91148	2.89441	2.01107	0	1.41656
58810	Akr1a1	0.878571	2.13	1.75	2.81	3.5	3.58	6.13	11.67	11.32	19.05	23.23	36.58	30.94	41.16	44.5	38.61	170.22	198.661	176.943	188.314	203.367	198.161	196.754	205.029	204.483	217.333	221.066	223.042	266.783	289.888	207.607
67861	Akr1b10	0.613596	0.11	0.12	0.24	0.23	0.3	0.41	3.27	4.22	5.87	5.77	7.59	3.74	0.84	0	0	4.00965	2.42979	2.48608	3.09083	2.07012	3.36458	5.01073	3.28957	4.85516	3.34907	3.96511	3.78338	2.14507	0	0
11677	Akr1b3	0.0714286	4.04	3.04	2.5	1.91	1.98	2.6	2.57	2.84	2.93	5.04	4.67	3.81	3.13	1.86	1.83	26.0988	25.0429	21.5284	15.6256	14.0819	11.0669	11.9737	14.0506	12.0406	10.668	9.90996	6.87539	11.2534	6.18966	4.21593
11997	Akr1b7	0.85997	0	0	0.41	0.32	0.41	1.24	4.86	19.79	28.17	29.27	37.01	11.21	2.69	0.16	0	1.43801	1.89793	3.56311	8.1135	6.6433	29.29	87.4591	86.8684	54.4837	53.9616	41.78	50.7058	10.0553	0	0
14187	Akr1b8	0.596429	0.04	0.14	0.38	0.31	0.3	0.63	1.86	6.45	9.39	6.27	8.31	3.16	1.21	0.08	0.12	5.48878	4.03369	4.29425	4.26319	3.76776	3.70212	4.63657	6.29386	5.30411	6.9089	6.40574	4.00401	4.10603	1.15284	1.21207
622402	Akr1c12	0.889286	0.06	0.16	0.7	0.9	1.16	1.88	3.14	5.5	9.67	4.82	8.62	9.52	11.01	11.57	15.26	6.45079	5.82015	11.0264	11.6524	9.47006	13.7678	17.8688	24.4266	18.1688	26.6217	22.6472	47.7481	38.4241	36.4396	32.6599
27384	Akr1c13	0.764286	0.22	0.47	1.03	1.23	1.57	3.03	3.98	6.25	10.84	6.09	9.42	9.37	12.67	12.92	16.35	15.0064	14.0074	19.8217	22.4878	22.5806	29.7983	25.3776	28.6854	22.1598	30.585	23.1772	42.7291	46.158	44.1545	35.1149
105387	Akr1c14	0.929151	0	0	0.03	0.08	0.21	0.83	1.88	1.97	4.54	11.76	17.57	28.61	32.73	27.41	39.55	0	0	0	2.35881	3.35658	11.7273	10.9586	13.05	25.8704	38.2549	40.9335	46.5202	64.3379	24.2934	32.6512
105349	Akr1c18	0.904629	0	0	0	0	0	0	0	0.55	1.92	17.26	22.26	40.37	61.92	0	0	0	0	0	0	0	0	3.0138	15.7486	39.8436	37.1387	39.3163	49.1293	34.3792	0	0
432720	Akr1c19	0.00357462	0.64	0.92	1.53	1.75	2.27	3.36	5.24	3.43	7.24	5	5.22	5.24	14.74	19.47	26.19	11.2033	10.2918	15.6879	20.8796	15.1017	17.5056	4.30669	6.80348	6.05343	10.2215	12.0075	12.5164	45.4886	16.592	12.0737
116852	Akr1c20	0.883645	0	0	0	0	0	0	0	0	1.38	13.69	15.8	50.86	72.31	49.45	35.84	0	0	0	0	0	2.61253	5.49604	4.35684	34.2835	53.3723	76.1205	70.1466	117.94	34.4117	30.4735
83702	Akr1c6	0.967748	0	0	0.02	0.03	0	0.58	1	2.15	5.22	45.24	77.65	250.29	335.42	200.41	219.15	1.55763	0	1.66119	1.75285	1.63358	5.9561	23.5824	20.2821	125.29	181.361	256.708	256.113	420.177	320.986	291.522
208665	Akr1d1	0.871752	0	0	0.13	0.18	0.48	1.26	3.45	4.9	13.87	19.5	33.17	66.15	67.53	42.32	25.31	0	0	0	3.76222	5.97521	11.5237	16.2997	20.388	28.6068	45.3367	50.148	43.1027	63.0504	15.845	11.7629
56043	Akr1e1	0.714286	0.51	0.62	1.22	2.78	2.03	2.28	2.12	3.05	4.61	8.49	11.92	7.61	9.43	12.2	11.93	8.14419	6.47219	7.00247	8.02436	6.69308	8.91079	9.17221	6.79408	14.1465	16.5649	18.403	18.6973	13.2507	11.6828	11.392
110198	Akr7a5	0.885714	0.76	0.98	1	1.09	1.56	2.4	3.78	3.52	8.07	9.84	9.6	14.68	15.52	20.87	25.32	22.1687	37.8021	24.6419	30.6986	59.1417	51.2593	43.0696	98.5792	73.5703	71.3946	82.1612	79.6141	112.052	210.842	100.246
11651	Akt1	-0.261181	0.21	0.11	0.07	0.16	0.11	0.14	0.12	0.13	0.24	0.23	0.39	0.25	0.25	0.02	0.08	58.0412	75.3765	50.3028	44.7573	49.0465	35.1535	30.4343	42.3915	34.0616	32.5848	29.3727	23.2578	23.6824	25.5695	20.4014
67605	Akt1s1	0.580193	0	0.37	0.32	0	0.08	0	0	0.22	0	0	0	0	0	0.46	0.17	34.1867	39.6095	27.356	25.7335	32.9487	24.137	23.3764	34.4724	29.9751	33.6223	32.0686	28.2416	28.6623	45.3715	33.2918
11652	Akt2	-0.567085	0.07	0.08	0.04	0.08	0.06	0.09	0.04	0.1	0.13	0.16	0.24	0.28	0.34	0.21	0.17	31.6421	40.3647	24.7875	28.592	36.0517	21.7719	19.5488	20.4777	20.0648	19.3116	17.8357	19.5755	14.0891	26.0293	22.8883
17025	Alad	0.18588	16.23	14.91	14.91	15.18	12.9	12.23	7.01	6.03	7	7.64	10.27	16.2	28.27	15.5	14.48	324.976	442.49	349.426	325.698	359.187	230.754	125.166	111.259	114.203	78.6966	100.965	81.4658	110.114	131.047	64.7525
11655	Alas1	0.344099	0	0	0	0	0	0	0	0.17	0	0	0	0	0	0	0.15	6.44886	10.2273	9.89671	11.8179	12.7509	10.7097	12.4379	25.0306	13.4773	25.6264	40.6579	26.5365	42.0907	60.4814	94.8572
11656	Alas2	0.911037	0.56	0.54	0.59	0.7	0.72	0.37	0.14	0.17	0	0	0	0	0	0	0	372.842	432.957	442.135	506.613	655.842	440.362	305.182	170.473	188.562	73.6945	67.2278	15.9853	12.3045	76.5974	45.3543
11657	Alb	0.653571	11.2	15.98	49.6	70.87	99.61	235.7	234.82	314.52	124.32	395.39	540.52	611.65	874.37	961.49	696.54	2045.69	1148.78	4068.91	8048.9	7138.63	18626.4	28945.5	21915.4	25738.4	33319.5	31972.1	28072.3	31639.7	17040.1	13632.4
11658	Alcam	0.654156	0.29	0.47	0.49	0.43	0.49	0.89	1.4	1.41	1.5	1.38	2.85	2.26	1.28	0.42	0.75	8.26974	2.61544	5.35085	6.78564	4.48696	8.36399	6.88025	6.23836	9.57775	11.5618	9.63099	11.9441	7.7891	2.42027	5.15316
69748	Aldh16a1	0.530831	0.42	0.37	0.74	0.53	0.61	1.28	0.44	0.73	1.22	1.4	1.98	1.83	1.3	1.98	2.53	13.6365	18.0805	12.3558	12.4902	13.9489	11.0304	10.9929	13.9999	13.052	14.0226	16.014	16.4018	20.8233	24.5007	19.6472
56454	Aldh18a1	0.544166	2.93	1.65	1.29	3.46	1.94	2.07	0.43	0.49	0.6	4.45	4.29	0	0	0	0	32.7355	42.9313	27.1493	20.1119	19.8504	12.0783	9.96001	5.67061	6.77595	4.59321	3.45749	1.82394	2.19963	0	1.41444
11668	Aldh1a1	0.968132	0	0	0	0	0	0	0	0.43	1.18	2.22	2.01	5.18	44.73	243.57	296.33	0	0	0	0	0	0	1.10601	2.13386	3.51776	2.99852	4.57485	4.67596	57.1081	294.777	349.863
19378	Aldh1a2	0.731925	0.26	0.22	0	0	0	0	0	0	0	0	0	0	0	0	0	1.88093	0	0	0	0	0	0	0	0	0	0	0	0	0	0
26358	Aldh1a7	0.867926	0	0	0.09	0	0.32	0	0.67	1.4	2.88	1.09	3.11	4.51	17.55	68.73	67.1	0	0	0	1.09523	0	1.01703	0	1.32638	1.79781	2.68457	8.28528	2.74831	35.3181	49.218	74.8868
72535	Aldh1b1	0.00357143	3.24	3.63	8.47	9.77	10.11	16.97	26.25	32.82	64.49	54.27	53.82	76.93	75.46	69.14	31.67	22.3176	42.1198	39.4478	61.7397	93.317	75.447	35.5171	25.4176	88.3954	79.5636	96.4739	19.6078	44.9026	30.2822	13.8923
107747	Aldh1l1	0.989286	0.13	0.29	1.66	1.76	2.23	5.24	8.98	14.19	23.04	32.21	47.52	67.7	181.08	198.51	151.75	5.56493	11.882	10.8048	20.3428	38.811	33.2845	52.7083	83.4794	90.6608	107.761	127.995	133.497	526.011	432.291	283.103
11669	Aldh2	0.957143	6.94	8.21	15.4	15.07	16.68	32.6	42.16	54.79	105.42	119.75	211.42	280.4	512.5	504.62	517.85	49.8862	63.5581	52.643	63.3185	117.811	96.9751	121.971	106.086	131.211	173.572	175.718	271.656	373.253	562.426	391.835
11671	Aldh3a2	0.778571	0.21	0.23	0.79	0.69	0.88	1.69	2.79	3.14	8.96	11.5	15.51	19.76	12.38	14.35	8.66	9.89373	9.98962	12.0451	15.7197	19.8315	21.362	23.3622	56.55	35.7171	63.2084	52.4356	64.5932	37.2025	21.3309	10.805
67689	Aldh3b1	0.7523	0	0	0	0	0.04	0.04	0.06	0.03	0.09	0.1	0.08	0	0	0	0	1.36146	2.68978	2.85704	4.87609	7.43758	6.19816	7.87693	6.20659	5.66395	5.69921	4.95277	2.23835	2.01136	2.35928	2.23088
212647	Aldh4a1	0.907143	1.66	2.3	5.33	5.52	6.93	11.55	13.24	16.93	33.3	50.07	74.62	176.87	170.14	107.01	71.59	30.7827	36.0787	38.1495	56.4351	58.5201	54.0121	36.1758	69.732	108.722	104.642	136.094	129.623	129.514	112.927	58.9632
214579	Aldh5a1	0.864286	0.15	0.2	0.36	0.48	0.58	1.01	1.58	2.08	4.37	3.72	4.68	7.69	8.84	9.98	6.76	3.20461	3.53629	3.62005	4.44644	5.20501	4.39022	3.80752	4.40928	6.8977	7.86408	8.81362	8.31695	10.0135	7.77467	6.26493
104776	Aldh6a1	0.939286	0.27	0.49	2.33	2.26	3.44	7	12.42	16.35	34.13	41.48	64.29	98.05	98.56	128.47	80.71	5.95926	5.25413	8.38756	12.803	14.8941	22.6876	26.0109	39.4162	35.3571	56.234	44.8028	79.2005	83.57	47.8923	48.5743
110695	Aldh7a1	0.839286	1.39	1.55	3.01	3.44	4.65	9.25	11.37	14.05	27.46	22.23	32.44	47.69	56.36	70.11	96.16	24.1267	23.7975	25.6986	30.9038	56.11	51.9618	58.3002	46.431	56.7743	86.3044	92.0034	48.0566	91.6519	131.673	88.3601
237320	Aldh8a1	0.975	0.06	0.14	0.69	0.67	0.96	2.06	5.24	5.94	13.85	16.16	21.15	38.66	45.81	35.71	33.36	3.75924	7.24355	11.1681	18.6114	20.5344	30.1905	33.1059	43.3108	59.8749	79.589	86.3413	84.5168	113.794	100.004	92.5084
56752	Aldh9a1	0.7	4.7	3.33	4.24	5.06	5.6	8.26	7.28	7.87	21.39	20.39	26.1	29.7	36.61	46.14	34.47	45.5761	51.2834	47.4191	40.5664	45.5346	37.4961	27.6424	50.4573	51.4139	64.2316	66.2668	69.5237	59.842	73.5573	52.9672
11674	Aldoa	0.817857	37.05	17.81	13	9.1	7.95	10.03	12.2	9.91	10.78	9.16	7.44	3.93	4.61	2.09	3.77	295.531	346.065	195.579	129.829	150.761	116.086	136.819	111.451	77.1929	68.8356	86.8298	54.7088	47.8568	68.7117	45.9327
230163	Aldob	0.939286	3.25	5.09	26.65	33.23	54.31	139.86	318.81	695.71	1166.58	969.97	1250.9	1431.35	1341.3	1286.34	1176.63	46.8313	73.2541	121.885	190.586	257.559	449.914	731.517	1036.39	1073.67	1146.52	1397.32	1561.99	1309.69	1065.2	1004.6
11676	Aldoc	0.432143	0.05	0.06	0.38	0.17	0.59	0.91	2.72	2.43	3.08	1.51	0.86	0	0.35	0.45	0.93	3.00804	3.34824	3.01135	4.70829	13.4458	13.7925	17.6627	10.8498	4.82197	6.09207	6.94994	6.91093	10.7135	6.53291	4.33601
380959	Alg10b	-0.185577	0	0	0	0	0	0	0	0	0	0	0	0	0	0	0.05	5.29161	4.50335	4.27262	3.65016	2.84255	3.46495	1.45906	3.07491	3.9674	3.37037	2.98588	1.42677	1.68373	1.31204	2.55666
207958	Alg11	-0.00850487	0	0.01	0	0.05	0	0	0	0	0.06	0	0.12	0	0	0	0.03	3.10352	1.97962	3.12631	2.67263	2.07458	2.99894	3.3484	3.1678	3.55964	3.43117	3.04294	3.92946	2.74482	1.88457	3.27843
56737	Alg2	-0.477639	0.21	0.14	0.56	0.22	0.26	0.32	0.52	0.27	0.58	0.63	0.72	0.52	0.63	0.2	0.38	10.1383	9.85747	8.32159	7.76729	7.59265	6.03163	4.37539	4.65284	5.45288	5.24821	5.93761	3.10769	3.00873	5.32493	5.43103
208624	Alg3	0.0622422	0.02	0.02	0	0	0.03	0.02	0	0	0	0.05	0.19	0	0	0	0.07	18.2721	23.6348	12.1672	12.8016	13.1416	9.49165	9.04058	8.75264	11.0923	8.9037	10.2757	5.25974	11.515	18.5509	11.4569
66248	Alg5	0.686942	0	0	0.16	0.15	0.18	0.12	0.19	0.42	0.49	1.55	0.98	0.83	1.24	0.49	1.31	11.9562	9.59548	10.2892	9.17452	6.96402	7.91356	8.95154	14.1701	12.8876	13.9157	12.5574	15.8154	17.9164	19.1578	15.4919
320438	Alg6	-0.139345	0	0	0	0	0	0	0	0	0.04	0	0.11	0	0	0	0	5.51916	2.10488	4.63879	4.96536	1.92433	2.26897	1.87997	0	1.777	2.71974	1.64979	1.35627	1.38716	0	0
381903	Alg8	0.313527	0.19	0.1	0.03	0	0.13	0.16	0.06	0	0.32	0	0.14	0.2	0	0	0	19.9235	15.4275	15.8487	17.3204	13.3692	12.9165	7.31987	6.21811	9.84944	9.36276	8.03633	4.68647	5.49553	4.62643	4.279
69113	Alkbh3	0.0106311	0	0	0	0	0.06	0.13	0	0	0	0	0	0	0.09	0.18	0.2	11.5255	9.57498	8.42489	9.01394	8.30458	7.82805	7.38002	8.98966	7.62299	8.23279	8.1058	8.45929	10.5052	10.9185	7.9386
268420	Alkbh5	0.625108	0.07	0	0.11	0.03	0.01	0	0.13	0	0	0	0	0	0	0	0	21.7658	19.4933	19.3944	18.4551	16.4913	12.3294	11.5935	10.6124	11.4504	10.268	7.94663	9.31532	9.08789	9.43903	11.136
233065	Alkbh6	0.307323	0.07	0.03	0.06	0	0	0	0	0.04	0	0.1	0.11	0.09	0	0.03	0.03	7.05129	7.08922	5.29186	4.45208	6.08355	3.74164	6.20134	8.16412	5.09786	5.43282	7.81547	7.25895	8.20915	8.07825	7.6588
66400	Alkbh7	0.371154	0	0.06	0	0	0	0	0	0	0	0	0	0	0	0	0	13.7831	18.3444	12.243	13.5086	14.2308	10.2368	10.7013	12.1057	10.4638	10.5023	12.2749	9.06357	17.5726	24.0584	14.1965
67667	Alkbh8	0.510637	0.05	0.15	0	0.06	0.05	0.02	0	0	0	0	0	0	0	0	0	7.57186	1.53094	5.20308	5.28745	1.75003	3.15332	1.7369	2.05147	2.1827	1.41904	1.45111	1.04494	0	0	0
11684	Alox12	0.654365	0.06	0.07	0.02	0	0	0	0	0.2	0.05	0	0	0	0	0	0	15.6154	16.6367	10.4597	8.8784	14.0088	6.60905	7.86831	10.4664	6.17014	3.86014	3.62453	0	0	0	0
11689	Alox5	0.312094	0	0	0	0	0	0.02	0	0	0	0	0	0	0	0	0	2.58182	1.82317	1.83172	1.8657	4.04907	3.11596	4.09195	2.9358	2.61739	2.24499	1.27644	0	0	0	0
11647	Alpl	0.359066	0	0	0.03	0.04	0.02	0.02	0.02	0.12	0.13	0.07	0	0	0	0	0	3.15485	5.77785	5.1455	6.37081	8.79552	9.54861	6.46408	3.91353	9.16657	9.50896	9.94091	6.9182	2.10837	2.72648	0
74018	Als2	0.376591	0	0	0.01	0	0	0	0.01	0.05	0.16	0.12	0.2	0.24	0.03	0	0.09	5.35392	4.97528	4.9713	5.36384	5.41211	6.14288	5.91179	5.32507	8.43082	8.95519	7.81763	7.1729	10.0126	11.8812	8.90004
235633	Als2cl	0.222507	0	0	0	0	0	0	0	0	0.05	0.01	0	0	0	0.01	0	2.66695	2.9296	2.30761	2.81906	2.54294	2.96275	3.54061	6.61478	4.173	4.96099	6.61977	7.35882	5.0939	4.31374	4.05887
21681	Alyref	0.364286	9.04	3.13	2.28	1.77	2.2	1.64	2.35	3.41	2.52	2.18	2.4	2.57	2.43	1.44	0.63	44.9919	40.956	41.3708	34.6663	27.0572	21.8814	13.6034	14.2803	15.1468	10.0749	11.7118	5.8482	7.33607	3.44319	3.8292
17117	Amacr	0.936551	0.04	0.69	0.83	0.69	0.72	2.16	1.6	3.44	5.82	14.92	19.36	27.59	17.31	9.52	9.45	5.79259	7.84084	8.96914	10.6253	12.2122	13.0219	16.4612	42.7309	40.0245	57.5922	57.351	69.4365	49.2541	57.5932	35.3253
11699	Ambp	0.767857	0.32	0.54	0.85	0.81	1.01	1.35	2.63	1.48	3.35	3.83	4.34	2.61	1.74	3.11	0.99	405.731	399.031	574.626	846.694	1044.15	1309.65	1575.17	1752.37	2042.08	2269.89	2371.93	2210.88	1840.33	3229.67	3121.88
71761	Amdhd1	0.975	0.04	0.15	0.59	0.65	0.71	2.65	3.18	5.21	14.67	14.42	29.54	61.24	65.95	34.82	36.71	3.9502	6.45146	6.49633	10.4579	15.4528	14.2077	17.6906	44.5501	41.4822	53.4095	63.2692	71.3332	114.77	106.665	63.7228
245847	Amdhd2	-0.153846	0.1	0.1	0.22	0.12	0.05	0.32	0.63	0.22	1.09	0.56	0.75	0.25	0.44	0.26	0.16	9.14832	15.1114	11.0805	11.427	14.0788	11.2693	8.77975	11.3173	13.8018	11.9285	11.1313	11.7667	8.38856	12.8406	7.88999
23802	Amfr	0.445468	0.04	0.05	0.03	0.05	0.12	0.05	0.07	0.05	0.23	0.14	0.22	0.14	0.26	0.09	0.15	48.7558	59.5014	53.7444	52.6656	60.7599	46.8136	43.3584	54.0739	55.4903	59.1055	52.2504	54.0666	64.8497	80.3783	72.8139
56068	Ammecr1	0.861903	0.17	0.36	0.08	0.07	0.04	0.05	0	0	0	0	0	0	0	0	0	11.7121	10.2383	12.3686	11.6406	6.55578	5.50088	3.3062	2.25985	2.69621	1.78009	1.33939	0	0	0	0
225339	Ammecr1l	-0.206783	0.02	0.03	0	0	0	0	0.01	0	0	0	0	0	0	0	0	8.12908	6.66682	6.61703	6.67077	5.88672	8.06205	7.26824	7.89352	8.23807	10.1301	9.96866	9.35609	9.97001	7.36433	6.99828
109674	Ampd2	0.464286	0.8	1.54	1.18	1.08	0.69	0.47	1.55	1.1	0.41	0.43	0.77	0.33	0.73	0.64	0.4	43.6282	39.5111	37.2176	38.2331	59.7763	40.8259	23.2598	15.1317	13.6394	11.925	11.5946	8.13046	7.44394	10.4939	9.32729
11717	Ampd3	0.8409	0.07	0.12	0.08	0.14	0.08	0.12	0.1	0.06	0.04	0	0	0	0	0	0	9.67066	14.0936	9.96388	9.82504	13.2578	5.41819	8.29057	2.56451	7.19253	2.0311	1.16223	0	0	0	0
434437	Amt	0.742857	0.63	0.92	0.67	0.28	0.8	1.18	0.71	1.66	4.78	6.77	7.67	16.38	12.47	7.45	2	9.4237	9.13938	7.80881	10.6231	9.40819	10.3152	7.20418	4.70913	16.9137	26.7429	30.6417	23.5771	21.2743	18.5361	15.5203
11722	Amy1	0.453557	0	0	0	0	0	0.54	0.03	0.03	0.26	0	0.14	0.05	0.03	0.06	0	2.87695	1.28382	4.46255	8.29834	5.94941	21.2959	34.5279	60.8174	48.6769	70.1627	82.0904	85.8368	115.315	34.9015	58.0539
17222	Anapc1	0.836772	0.1	0.1	0.05	0.06	0.06	0.05	0.01	0.01	0.02	0.01	0.02	0	0	0	0	24.3156	22.4536	15.9727	16.7603	15.6585	9.51185	7.54392	5.61941	8.29092	6.01072	3.58423	5.68808	4.6254	5.84515	4.97441
99152	Anapc2	0.77739	0.19	0.17	0.12	0.09	0.11	0.09	0.06	0.06	0.1	0.09	0.14	0.05	0.01	0	0	31.0216	36.6195	29.9202	24.4976	25.6585	19.1073	16.0686	15.7053	17.5981	19.5196	15.9105	15.4944	13.6429	17.0733	14.2162
52206	Anapc4	0.407173	0.27	0.11	0.08	0.08	0.04	0.07	0	0.02	0	0	0	0	0	0	0	14.7673	12.2697	15.7952	13.5787	6.89785	10.4432	9.39867	10.5101	13.0331	14.7891	13.5634	11.6141	7.28055	3.87865	3.49411
59008	Anapc5	0.81041	0.2	0.22	0.1	0.13	0.05	0.23	0.05	0.08	0	0	0.02	0	0	0	0	149.446	192.481	148.976	130.714	132.612	88.8389	65.2449	62.3161	66.6676	51.7864	51.2799	43.9923	34.4	23.9168	16.5536
56317	Anapc7	0.729292	0.12	0.13	0.1	0	0.05	0	0	0	0.07	0	0	0	0	0	0	18.9834	23.1084	16.9603	16.6711	16.4356	11.3399	9.71828	11.3916	11.1523	9.96173	10.784	10.3651	7.76884	8.1981	5.29301
30924	Angptl3	0.587018	0	0	0.04	0.02	0.03	0.05	0.04	0	0.08	0.03	0.16	0	0.09	0.05	0.03	11.0183	5.0561	23.1884	60.2578	44.7707	124.734	135.425	82.852	225.957	148.074	223.406	146.312	236.42	57.1761	107.864
11733	Ank1	0.926164	3.26	2.96	3.31	3.22	1.87	1.73	0.93	1.84	0.81	0.44	0.33	0.11	0.21	0.08	0.26	65.8912	69.7967	55.3642	50.407	18.5027	37.3667	25.3681	10.3023	15.3202	8.82442	3.58532	0	0	0	0
11735	Ank3	0.641581	0.11	0.21	0.17	0.25	0.22	0.33	0.29	0.7	0.29	0.14	0.36	0.29	0.15	0.13	0.07	2.5154	1.7024	1.72584	3.91756	2.95659	3.66877	3.85049	4.14017	2.8309	3.37798	3.26045	2.15232	3.24514	1.07261	0
11736	Ankfy1	0.409294	0.34	0.3	0.36	0.45	0.44	0.25	0.53	0.29	0.44	0.56	0.48	0.35	0.26	0.17	0.24	9.06037	9.38139	9.81013	8.13116	7.46955	5.73219	5.18545	5.14433	6.19441	5.88009	3.33291	2.41234	2.2331	1.9933	1.71032
108857	Ankhd1	0.35511	0.09	0.11	0.06	0.04	0.05	0.06	0.04	0.04	0.04	0.05	0.07	0.07	0.06	0	0.01	19.8477	16.1341	17.0052	23.971	11.9687	12.7682	16.2304	7.03264	13.0892	7.68562	11.7716	11.6178	12.3224	6.31055	9.20774
71782	Ankle2	0.685159	0.05	0.04	0.05	0.03	0	0.04	0	0	0.01	0	0	0	0.02	0	0	7.66149	5.78493	6.868	5.5256	4.32951	4.14256	3.77886	4.37555	3.8677	3.59267	3.07217	3.29541	3.01761	2.60995	2.68412
217473	Ankmy2	0.444205	0.19	0.09	0.07	0.08	0.15	0.07	0	0	0	0.07	0.07	0.05	0.1	0	0	5.2314	6.40536	4.78076	4.18457	3.87516	3.49202	3.24697	3.52377	4.61643	4.58364	4.87033	4.38544	3.11894	2.25684	2.00711
68420	Ankrd13a	0.894475	0.22	0.41	1.01	0.06	0.44	0.19	0.08	0.3	0.09	0	0	0	0	0	0	40.5081	49.8072	44.6257	35.2759	37.9237	24.9998	18.4648	20.291	20.0357	14.3937	12.442	7.12405	5.83964	5.41801	5.38689
81702	Ankrd17	0.562455	0.22	0.13	0.06	0.12	0.07	0.1	0.07	0.06	0.07	0.05	0.04	0.5	0.04	0	0	9.8719	6.02213	8.90631	8.17037	4.84047	6.33293	5.88194	7.132	6.04554	5.70223	4.68609	4.37653	3.43178	2.08609	2.64538
245886	Ankrd27	0.229399	0	0	0	0.02	0	0.01	0	0	0	0	0	0	0	0	0	16.7273	16.7557	14.9771	13.0748	12.3942	13.0128	14.6432	12.6867	9.71863	8.90457	7.20238	10.4228	6.10477	4.57332	4.49218
105522	Ankrd28	0.375	0.53	0.27	0.52	0.25	0.21	0.07	0.03	0.08	0.23	0.09	0.12	0.5	0.32	0.16	0.17	5.33297	3.5338	4.59854	4.6487	3.31325	3.53399	3.4132	4.83369	4.2056	4.17682	3.13178	3.45866	4.23242	2.06594	2.02665
329154	Ankrd44	0.579733	0.02	0.02	0.03	0.03	0.03	0.02	0.03	0.05	0.07	0.06	0.08	0.11	0	0	0	0	0	0	1.10845	1.00067	1.08604	1.73058	2.08378	1.96369	1.55652	1.18521	0	0	0	0
237615	Ankrd52	0.888728	0.04	0.07	0.05	0.02	0.02	0.02	0	0	0.02	0	0	0	0	0	0	10.6762	18.66	12.4765	8.63627	9.64795	6.62568	4.44724	6.34081	7.59098	6.89638	4.63312	4.39015	3.5077	2.02501	2.28584
74251	Ankrd9	0.4334	0	0.04	0	0	0	0	0	0	0	0	0	0	0	0	0	23.3705	28.898	26.3052	24.5776	25.4685	19.6507	11.383	4.48124	5.76583	2.08038	2.2729	0	0	1.68947	1.55121
224650	Anks1	0.0253396	0	0.01	0.01	0.01	0.01	0.01	0.01	0.05	0.02	0.02	0.05	0.01	0.01	0	0	4.66216	5.7281	4.24537	3.37077	4.61266	4.04434	4.16442	3.67732	3.4216	3.86065	3.15162	2.76267	1.80958	2.10371	2.47898
52231	Ankzf1	0.141471	0.05	0	0.02	0.01	0.02	0.1	0	0.03	0.11	0.02	0	0	0.02	0	0.03	8.04938	7.23767	8.27843	7.21155	7.8049	8.45237	6.77496	6.2759	4.49514	4.39708	5.5545	7.13414	8.79104	5.68271	6.57171
68743	Anln	0.820847	0.12	0.17	0.22	0.07	0.1	0.13	0	0	0	0	0	0	0	0	0	14.0392	7.12912	14.9858	14.5459	7.42753	8.21327	4.42884	3.51386	5.73507	3.77801	3.01808	2.16614	0	0	0
102566	Ano10	0.833636	0	0	0	0	0.02	0.03	0.06	0.07	0.07	0.12	0.13	0.06	0	0	0	4.69844	6.60398	5.5752	5.62303	6.58317	6.0708	7.51457	8.1643	9.46639	10.467	6.88947	7.2064	6.08362	5.90041	5.1244
105722	Ano6	0.520946	0	0.02	0.03	0.02	0.02	0	0.02	0.07	0.08	0	0.05	0	0	0	0	6.5934	5.56722	5.13956	5.86034	6.42947	5.78667	6.14844	7.39805	6.79464	5.56848	4.5321	4.30068	2.58989	1.4261	1.41883
11737	Anp32a	0.275	22.26	12.59	10.8	14.49	12.98	15.35	13.64	17.23	22.9	13.91	19.06	16.06	20.18	8.85	6.88	126.142	64.4913	105.554	91.0819	24.9051	79.0125	65.1782	50.6155	43.8791	40.1629	49.4902	40.5359	50.2223	26.758	36.5079
67628	Anp32b	0.442857	23.73	18.08	15.78	17.4	17.71	14.8	17.05	11.81	19.09	22.46	12.79	10.69	17.8	12.95	2.64	860.973	907.643	873.553	693.682	545.437	496.052	257.01	218.638	197.032	107.135	108.915	69.1018	56.6605	38.505	31.2348
66471	Anp32e	0.928571	7.92	6.59	6.03	5.94	6.17	4.05	3.19	3.76	4.93	2.19	2.29	1.45	0.67	0.25	0.43	74.2013	68.6997	70.7645	69.1453	51.2673	53.0723	33.5371	29.2927	22.5776	17.5599	12.7761	8.15188	7.12732	4.16446	4.90005
16790	Anpep	0.707143	0.37	0.52	1.08	0.73	0.93	1.41	1.17	1.7	3.68	2.25	2.41	2.27	2.65	1.57	3.57	12.8667	20.8074	16.4989	19.124	25.7232	17.3126	15.7436	23.4077	31.0461	37.0429	30.1095	30.513	27.9119	41.0271	33.4666
16952	Anxa1	0.907143	0.73	0.62	3.94	2.89	4.42	6.59	10.95	7.14	8.44	5.52	7.33	1.62	0.92	0.31	0.39	4.37234	2.4929	7.12349	14.4651	19.4843	35.9856	37.8062	44.5059	23.5112	30.3133	16.3344	3.92356	3.90726	0	1.18571
11744	Anxa11	-0.00358103	0.16	0.19	0.26	0.39	0.39	0.63	0.54	0.53	0.54	0.41	1.28	0.82	0.82	0.55	0.66	4.11831	5.64031	4.17456	4.06585	7.1432	5.09349	5.06811	5.83924	5.48919	6.46062	4.77541	4.67747	5.03831	6.93309	4.64305
12306	Anxa2	0.746429	5.05	5.16	8.06	8.67	10.92	21.46	26.71	25.87	28.09	23.08	19.36	14.46	6.98	4.02	2.31	28.4099	32.3396	31.0493	40.2931	62.6391	68.5475	66.7363	31.5866	40.5039	44.6824	45.8498	34.6394	10.9862	3.30672	3.387
11745	Anxa3	0.278571	0.43	0.49	0.66	0.96	0.88	0.82	1.14	2.07	5.55	1.71	5.02	0.67	1.12	0.98	1.2	6.95896	4.91555	6.51369	7.90326	7.86008	10.7538	9.67344	7.40324	8.45473	8.29594	7.61803	5.92358	4.9841	1.36746	1.70031
11746	Anxa4	0.646429	2.02	1.25	1.95	2.14	1.85	4.09	5.21	5.88	8.1	7.24	10.93	12.01	10.95	5.54	6.03	11.9018	10.955	13.4213	16.8553	15.1734	18.8147	15.5279	14.5802	17.1294	21.7048	17.3143	32.5762	18.4625	15.1617	11.067
11747	Anxa5	0.607143	2.84	2.83	5.05	4.18	4.88	7.28	10.14	13.13	17.14	17.48	23.92	22.72	21.19	15.6	16.21	28.9545	31.3648	27.9824	29.4356	30.1481	27.0044	35.0725	27.7412	38.7172	43.0247	42.4285	49.9081	32.0479	34.2334	28.0748
11749	Anxa6	0.507143	3.09	3.78	6.04	4.68	5.82	9.16	13.33	15.69	21.46	19.77	22.73	20.58	24.32	16.82	13.9	37.7956	46.0035	35.3889	40.9282	58.1782	50.403	55.3421	39.4822	60.8337	60.6796	51.9967	47.2063	54.0472	61.5071	38.3382
11750	Anxa7	-0.793566	1.57	1.48	1.59	1.73	1.56	1.68	2.24	1.89	3.31	2.15	3.06	2.47	2.24	2.41	3.16	34.3249	36.4057	33.1345	33.0141	28.4426	26.3058	20.9246	23.6055	19.4074	18.8401	19.9993	26.0788	18.4717	19.8945	18.5164
11761	Aox1	0.77185	0	0	0	0	0	0	0	0	0	0	0	0	0.08	0.3	1.33	0	0	0	0	0	0	0	0	0	1.38072	1.50204	1.24178	9.09187	10.5634	8.40262
71724	Aox3	0.979858	0	0	0	0	0	0.21	1	0.67	1.22	1.88	2.3	2.09	2.87	4.67	20.91	0	0	0	0	2.66431	8.92659	14.7697	6.80842	15.8407	19.6048	21.4609	22.1278	37.4109	104.315	61.6106
11764	Ap1b1	-0.685714	2.22	1.88	2.4	2.19	2.3	2.85	2.35	3.61	6.87	7.83	9.25	10.77	7.99	4.06	4.9	47.4799	61.1327	51.072	44.5086	46.143	27.2386	24.1619	25.2942	26.3464	28.7255	27.1932	13.6832	15.8756	18.9577	13.1484
11765	Ap1g1	-0.410714	0.66	0.43	0.34	0.38	0.5	0.49	0.7	0.47	1.15	1.16	1.45	1.69	1.2	0.84	1.12	10.1103	9.7819	8.85581	8.35099	9.47638	7.86582	6.1776	7.55731	9.33618	10.0502	7.2221	4.86578	6.60677	6.43702	5.07017
11766	Ap1g2	0.82404	0.12	0.16	0.08	0.04	0.06	0.13	0	0	0.04	0	0	0	0	0	0	14.1315	16.1083	11.6432	8.48429	10.1038	5.24858	5.98604	4.2511	4.61905	3.19522	2.98955	3.41276	3.30068	2.98982	2.9251
11767	Ap1m1	-0.600536	0.77	0.69	0.61	0.83	0.64	1.1	0.87	1.41	3.49	1.76	2.49	2	1.54	0.87	1.03	33.6293	35.2832	25.7846	24.1749	32.5379	19.2058	19.5352	21.0186	20.5274	18.8498	14.3021	14.2516	11.8449	11.1885	9.20319
11769	Ap1s1	0.0843058	0.49	0.26	0.61	0.4	0	0.24	0.29	0.56	0.61	0.63	0.74	0.89	0	0.13	0	74.6219	85.8165	66.3519	53.4488	53.8522	44.4185	43.9652	38.7463	41.8864	36.7648	38.9482	34.4435	27.8918	29.2085	20.0152
108012	Ap1s2	0.248324	0	0	0.04	0	0	0	0	0	0	0	0	0	0	0	0	2.40117	1.48058	2.45514	2.67566	1.79945	3.04583	2.03276	1.38267	2.1054	2.5694	2.14851	1.5097	0	0	0
11771	Ap2a1	-0.620076	1.32	1.11	1.37	1.11	1.26	1.09	1.11	0.97	1.28	1.47	2.06	1.78	1.7	1.99	1.53	65.1064	91.9354	70.8246	60.9152	62.4887	34.9463	26.0204	21.2683	22.6372	16.5783	15.0926	9.71965	11.9444	13.2166	11.6151
11772	Ap2a2	-0.717857	0.81	1.24	1.34	1.55	1.52	6.12	6.13	1.77	3.35	3.56	3.97	5.03	4.22	3.81	6.01	49.3468	61.2239	50.537	48.9999	54.1864	34.7079	28.8075	23.7048	35.4387	29.759	27.0029	17.1248	16.0603	24.8073	16.6912
71770	Ap2b1	-0.727436	1.78	1.8	1.93	1.72	1.82	2.17	2.07	2.17	3.38	3.25	3.99	4.06	3.41	2.69	2.59	13.6403	17.1514	12.977	12.1044	17.4529	14.7562	9.22491	6.83671	7.62287	7.06276	8.48221	6.82237	8.50834	8.90323	7.58947
11773	Ap2m1	-0.678571	1.64	3.01	2.27	1.61	1.94	2.31	2.47	2.43	3.54	6.71	6.84	7.36	4.54	3.11	3.9	86.0086	132.117	97.0085	115.678	101.125	70.0723	61.0332	61.1446	77.7428	66.09	61.1332	54.7412	65.3516	83.3106	57.8757
232910	Ap2s1	-0.789991	1.65	1.65	1.64	1.61	1.56	2.55	2.3	3.73	6.01	5.43	6.09	7.74	3.06	3.86	3.2	139.914	198.519	141.957	131.429	137.643	115.719	101.367	97.5488	91.1353	72.7436	86.4839	67.9501	75.3585	98.0831	62.7665
11774	Ap3b1	0.200538	0.29	0.24	0.21	0.16	0.15	0.2	0.19	0.19	0.42	0.34	0.39	0.31	0.2	0.15	0.23	12.9498	11.6427	12.4908	10.9596	10.0762	8.83263	8.27893	8.77387	9.43424	10.4489	8.72798	9.88887	7.34835	7.63995	7.1781
11776	Ap3d1	-0.393561	0.11	0.26	0.13	0.28	0.16	0.15	0.18	0.34	0.34	0.5	0.49	0.73	0.18	0.2	0.17	21.9523	22.225	19.3164	18.4319	18.1022	15.6786	13.8594	16.4557	15.5164	13.3676	13.5722	12.7471	11.0128	13.2176	13.1882
55946	Ap3m1	-0.210714	0.17	0.25	0.16	0.12	0.2	0.11	0.21	0.26	0.27	0.6	0.42	0.8	0.14	0.07	0.59	12.812	8.00343	10.4783	10.0001	7.19435	8.79553	8.23798	8.78252	8.33675	8.1704	8.89615	6.4036	11.3833	4.69285	10.0763
11777	Ap3s1	0.46128	0.27	0.33	2.23	0.94	1.7	0	0.25	0	1.98	0.11	0.16	0	0	1.37	3.26	19.5077	18.8006	20.511	18.7647	16.6465	15.586	13.9345	13.7747	13.1377	10.7191	12.7171	12.2381	9.64462	10.8217	14.1082
108011	Ap4e1	0.439072	0	0.04	0.13	0	0	0	0	0	0	0	0	0	0	0	0	2.33149	1.57664	2.2164	1.97133	1.31862	0	1.60867	1.17807	1.46617	0	0	0	0	0	0
11781	Ap4m1	0.453921	0.02	0.02	0	0	0	0	0	0	0	0	0	0	0	0	0	5.27485	5.78378	8.08368	5.29181	4.98262	3.48062	4.34268	3.22727	3.06459	2.92679	2.71607	3.16262	2.17181	1.89565	1.98237
11783	Apaf1	0.686684	0.02	0.03	0.02	0.04	0.02	0.01	0.01	0.01	0.02	0	0.03	0	0	0	0	4.59795	2.52456	4.09662	3.54475	2.7458	2.4058	2.59157	2.39947	1.99572	1.58776	1.40729	1.17221	0	0	0
54519	Apbb1ip	0.838026	0.2	0.3	0.35	0.19	0.25	0.11	0.18	0.13	0.26	0.15	0.15	0	0	0	0	10.7976	14.5592	13.8588	11.9313	12.991	7.01016	6.66006	6.92937	6.09895	4.51595	3.39839	1.55802	0	0	0
20219	Apcs	0.444599	0	0	0	0	0	0	0.37	0	2.22	0.42	7.25	0	0	0	0	4.17129	3.90224	10.3672	28.577	31.9748	114.201	479.763	551.184	641.232	302.878	321.734	206.228	350.684	129.467	667.197
235606	Apeh	-0.0875782	3.41	3	2.6	2.42	2.64	2.34	2.49	2.03	2.51	3.51	3.48	3.36	3.39	2.59	2.42	109.974	125.198	105.919	96.802	98.3644	62.5562	47.12	32.1295	41.6312	29.7394	27.5989	25.6452	22.3645	29.4296	22.8805
11792	Apex1	-0.196429	3.14	1.96	1.61	1.49	1.76	1.77	2.31	2.59	3.81	2.23	3.06	1.94	2.69	1.69	0.98	53.0147	55.7397	41.699	31.2638	28.1002	25.0482	24.3665	27.6326	15.0444	17.0404	13.1595	13.1044	19.5815	20.1497	15.7932
11800	Api5	0.691689	2.36	2.14	1.72	1.2	0.98	1.04	1.12	1.11	1.46	1.26	1.33	1.09	0.98	0.51	0.4	34.4456	24.7176	32.8041	28.6978	18.4785	17.5159	12.5874	14.394	15.0889	12.7532	11.4665	9.20649	9.96714	7.57386	8.82107
56369	Apip	-0.389286	0.64	0.47	0.44	0.31	0.37	0.4	0.25	0.48	0.6	0.83	0.92	1.25	1	0.56	1.16	19.6495	16.4798	23.1916	18.6458	13.0527	13.2985	11.0477	9.18216	12.9775	10.6588	12.4522	8.74593	9.83554	10.2518	13.5703
72103	Aplf	0.784931	0.23	0.02	0.01	0.01	0.01	0	0	0	0	0	0	0	0	0	0	7.92729	7.07957	8.73886	7.6683	4.87754	5.50497	3.19866	2.19627	2.31375	1.57894	1.09353	0	0	0	0
11804	Aplp2	0.288476	0.03	0.05	0	0.01	0	0	0	0	0	0	0	0	0	0	0	72.1707	89.577	84.1156	82.5659	83.6052	68.2163	63.5806	58.8402	73.1182	94.5056	72.725	87.6308	62.9229	64.6289	40.7855
71881	Apmap	0.35	0.19	0.2	0.27	0.32	0.26	0.61	0.72	1.13	2.43	1.76	1.77	2.7	2.12	0.93	2	13.7379	12.1154	16.1737	16.2587	12.3611	16.9822	14.0155	18.0521	17.8817	17.1235	19.2452	14.4193	15.1677	12.6848	9.19441
11806	Apoa1	0.85	9.37	9.27	15.42	13.63	15.36	33.52	41.19	65.17	34.65	79.38	80.74	122.38	77.52	58	59.35	947.428	1484	1664.48	2830.36	5384.96	6375.31	10073.1	14877.4	11202.2	12913.9	11195.5	15918.3	9775.97	11396	6478.61
11807	Apoa2	0.4721	0	0	0	0	0	0	0	0	1.79	0	6.18	8.2	0	0	12.48	966.222	1199.7	1755	2597.01	3510.19	4533.61	5122.97	7394.87	7913.73	8238.78	9111.15	10878.5	11645.7	15236.3	9265.03
11808	Apoa4	0.411081	2.2	2.05	2.26	2.82	2.18	3.16	1.6	9.22	12.69	13.65	22.62	11.48	2.27	2.19	1.98	3.04332	1.16625	0	0	1.03178	1.17996	5.20648	963.947	199.77	116.178	65.3448	699.776	66.0901	90.2984	112.751
66113	Apoa5	0.827894	0	0	0	0	0	0	0	0.68	0.81	0.18	0.43	0.45	0.45	1.49	0.33	2.58485	0	1.6338	0	1.08646	1.58827	31.9067	340.267	115.607	187.343	112.9	457.911	516.448	331.452	330.51
238055	Apob	0.764286	0.91	0.61	0.52	0.83	0.33	0.62	0.63	0.79	1.14	1.51	1.75	1.76	1.08	1.48	0.97	19.897	6.71269	27.5049	45.1551	35.6986	60.874	79.9436	131.622	151.171	209.563	181.986	247.207	162.876	75.2389	211.625
80287	Apobec3	0.874313	0.23	0.25	0.05	0.04	0.08	0.03	0.07	0	0	0	0	0	0	0	0	21.163	25.0945	17.8931	17.3011	16.0327	11.7093	14.9529	13.7952	9.8414	6.31642	5.86043	2.48497	1.03739	0	0
171504	Apobr	0.712647	0	0	0.01	0	0.01	0.02	0.02	0.03	0.01	0	0.03	0	0	0	0	0	0	1.01794	1.15848	2.76999	2.37669	3.54613	3.5661	2.80342	3.00567	1.93537	0	0	0	0
11812	Apoc1	0.898712	0	0	0	0	0	0	0	0	1.88	7.82	4.5	17.66	9.79	12.73	6.89	96.802	112.885	144.874	270.981	549.411	837.75	994.869	1511.09	2125.37	2452.37	3274.39	3768.89	4910.87	5447.09	3317.82
11814	Apoc3	0.753444	0	0	0	0	0	0	0.2	0	0	4.86	2.09	0	8.38	8.77	4.27	4.44991	6.42853	5.39478	7.16402	11.447	18.2286	167.375	152.079	115.074	142.411	283.728	295.733	2588.43	3574.74	2507.17
11816	Apoe	0.903571	3.1	2.98	4.58	6.11	4.73	9.14	14.05	20.91	23.57	35.56	45.16	75.73	23.15	21.63	18.89	791.284	837.44	1107.36	1442	2670.39	3613.24	5844.79	10746.7	12833.2	12492.8	12620.7	20713.8	17388.5	21799.2	12252
103161	Apof	0.518235	0	0	0	0	0	0	0	0.03	0	0	0.07	0.1	0	0	0	13.8455	16.5183	31.1087	55.9091	99.026	167.839	328.706	432.154	400.628	441.11	522.628	478.525	502.542	464.189	456.697
11818	Apoh	0.642857	0	0.03	0.56	0.77	1.4	4.66	6.58	4.73	5.39	6.55	5.88	4.81	4.69	3.72	3.98	41.1833	60.4626	173.341	276.952	532.729	216.22	586.826	368.725	1012.33	373.491	542.93	426.034	1259.7	690.331	370.76
223672	Apol9a	0.402573	0	0	0	0	0	0	0	0	0	0	0	0	0	0	0.06	0	0	0	0	0	0	0	0	1.45368	2.66294	2.92953	5.13915	11.019	87.016	52.5837
71898	Apol9b	0.62361	0	0	0	0	0	0	0	0	0	0	0	0	0	4.68	0.16	0	0	0	0	0	0	0	1.69762	2.27777	4.58239	6.85757	9.5968	22.8824	123.997	67.5552
55938	Apom	0.0574078	0	0.44	0.49	0	0	0.79	0.35	0	0	2.78	0	0	0	0	0	215.286	284.376	300.885	374.935	483.546	449.764	368.89	563.23	541.11	551.886	308.903	545.001	396.85	290.126	209.347
68316	Apoo	0.171429	0.22	1.94	6.94	0.11	0.36	0.13	5.33	0.29	2.32	1.16	0.9	0.91	1.53	1.31	1.75	15.9405	13.9806	18.9637	13.6069	10.898	11.7514	7.74596	9.62859	11.7535	10.678	12.5605	9.80861	16.1057	11.9597	13.8011
68117	Apool	0.346429	0.31	0.65	0.69	0.49	0.62	1.03	1.29	1.43	2.54	3.11	3.83	5.07	3.31	2.49	2.4	10.4788	5.4455	10.1111	8.53459	5.62201	7.96453	9.2629	7.33274	7.15196	8.93892	11.2803	13.774	11.5272	5.3823	7.74271
11820	App	0.309295	0	0	0	0	0	0	0	0	0	0	0.03	0	0	0	0	16.4	14.5618	12.7876	14.0507	15.218	12.5556	16.0376	27.8632	37.2457	40.7125	38.1108	38.981	29.7619	12.8479	10.8888
72993	Appl1	0.572715	0.15	0.15	0.33	0.16	0.08	0.29	0.33	0.22	0.17	0.53	0.52	0.31	0.25	0.44	0.15	1.7859	0	1.8931	1.83274	1.16142	1.8171	1.75046	1.45929	1.78711	2.26534	2.10685	1.8403	1.79437	0	1.28075
216190	Appl2	0.627888	0	0.01	0.03	0	0.02	0.07	0.06	0.06	0.06	0.06	0.05	0.12	0.06	0	0.09	5.21053	3.5091	5.24855	5.22019	5.60133	9.98581	12.4412	7.35396	8.12204	8.68114	8.21751	14.1575	6.37423	2.26127	2.89893
11821	Aprt	0.339286	4.01	3.45	3.89	4.22	4.92	10.15	12.53	10.93	14.86	8.02	5.23	2.68	1.9	1	0.93	137.861	180.465	113.724	115.479	146.592	130.878	102.629	104.241	85.0338	70.7336	99.2713	47.2487	66.6333	49.5894	29.104
11826	Aqp1	-0.175313	0.17	0	1.09	0	0.54	0.59	0.59	2.16	1.62	3.05	4.34	4.53	4.24	2.81	3.17	24.5803	43.6896	51.0364	57.8521	64.0058	60.6946	62.7667	118.359	123.502	70.3649	53.2027	33.115	28.3674	26.93	11.1657
11834	Aqr	0.889887	0.25	0.2	0.11	0.13	0.13	0.08	0.07	0.06	0.11	0.03	0.02	0.03	0.04	0	0.01	16.456	15.852	13.3081	11.1474	9.26333	6.33289	4.14574	4.75583	5.7135	5.16218	3.67379	2.847	2.38999	2.8429	2.8022
11836	Araf	0.200538	0.05	0.06	0.07	0.07	0.18	0.11	0.19	0.12	0.19	0.21	0.46	0.32	0.25	0.24	0.25	16.1611	21.5101	19.0305	18.4432	19.4098	17.1741	18.3914	23.0103	17.0062	19.7025	16.7843	21.3976	25.4909	25.073	18.8697
69710	Arap1	0.0595703	0.03	0.03	0.03	0.02	0.01	0.11	0.21	0.24	0.08	0.12	0.06	0.21	0.01	0	0.03	9.71901	10.4714	7.4506	7.3259	10.4959	3.90741	5.25531	9.01603	9.54368	7.63596	9.21623	8.2328	4.37738	4.60447	3.75438
213827	Arcn1	-0.242857	3.97	2.79	3.11	3.15	3.29	4.02	4.75	4.85	7.72	8.08	8.43	7.88	6.26	3.79	3.66	41.0568	29.3352	38.9048	37.885	30.7337	34.639	27.7933	29.0648	32.956	33.9479	28.7966	27.6877	26.1196	19.6112	25.8817
11841	Arf2	0.40943	2.72	2.38	0	4.67	4.5	5	5.83	3.9	0	8.88	8.92	0	0	0	0	12.6438	6.98244	11.0435	10.4904	6.17486	7.17361	7.22425	9.74222	9.21172	9.63893	10.2468	6.37395	5.70589	3.96568	3.07078
11843	Arf4	-0.0178571	3.88	4.06	5.73	4.3	5.44	7.16	6.93	5.49	14.77	14.72	14.04	12.87	10.44	7.2	6.69	56.5587	62.7461	48.05	50.0916	53.6256	55.2391	51.8226	69.3306	52.6162	60.6339	62.8533	60.7777	37.938	47.5554	37.0525
11844	Arf5	-0.857143	6.93	9.56	12.59	10.28	10.14	10.34	13.2	11.91	17.46	20.61	20.73	21.85	19.17	12.67	13.73	220.406	297.368	243.774	249.224	269.281	213.683	141.936	118.523	108.121	65.0685	81.2834	58.7231	67.2713	101.04	58.4919
11845	Arf6	-0.846429	1.25	2.17	1.33	1.15	1.41	1.71	2.08	2.72	4.96	4.59	9.66	9.6	8.05	6.12	10.14	49.9427	43.4499	43.1762	40.2406	35.3324	37.8658	30.0659	25.9929	24.645	24.9232	25.2764	18.32	17.9912	10.409	11.4409
228998	Arfgap1	-0.0986557	0.27	0.31	0.27	0.46	0.3	0.53	0.31	0.72	0.44	0.39	0.34	0.54	0.31	0.15	0.21	19.8398	16.4836	11.3979	11.7434	11.5159	9.66969	12.8997	8.88082	10.6038	8.8271	10.3004	8.56874	10.5737	8.46277	7.34178
77038	Arfgap2	0.0178731	0.68	0.48	0.81	0.56	0.58	0.62	0.92	0.92	1.68	1.26	1.51	1.92	2.16	1.87	1.84	34.7542	39.257	30.9825	34.2416	37.931	26.2075	28.4154	36.8024	37.485	39.6508	37.6896	32.4578	37.2017	38.4153	29.2186
66251	Arfgap3	-0.192976	0.06	0.11	0.11	0.09	0.08	0.09	0.09	0.09	0.18	0.07	0.15	0.17	0.05	0.13	0.35	7.86172	8.89322	8.39607	7.59059	9.7516	7.97082	6.83466	4.49618	6.65695	4.92253	5.29957	3.69416	2.96034	4.05726	4.14616
211673	Arfgef1	-0.0775512	0.05	0.04	0.05	0.06	0.07	0.05	0.08	0.08	0.07	0.1	0.13	0.15	0.13	0.04	0.13	7.56502	3.18374	6.97302	6.77445	3.36846	5.41873	5.53229	6.18052	5.05568	5.12958	3.55894	4.79524	4.5402	1.71066	4.50116
99371	Arfgef2	-0.118924	0.16	0.07	0.1	0.12	0.12	0.08	0.09	0.12	0.09	0.19	0.09	0.28	0.19	0.08	0.74	7.53836	7.70858	8.01973	7.03618	5.95102	4.94432	4.35082	5.75262	5.41244	5.10104	4.76277	3.19816	4.96743	3.15253	3.858
99889	Arfip1	0.123435	0.6	0.3	0.31	0.13	0.24	0.25	0.22	0.24	0.33	0.55	0.36	1.05	0.33	0.15	0.28	6.28711	6.58283	7.24951	7.21984	5.20213	7.20509	6.32984	7.26993	7.85147	7.03902	7.07173	6.64607	6.41541	4.86368	5.57526
76932	Arfip2	0.499313	0.04	0.04	0	0	0	0	0	0	0	0	0	0	0	0	0	8.69498	7.41258	8.10011	6.84282	7.49221	3.24022	4.80882	4.39944	4.94868	3.42873	4.15818	4.10554	3.44976	5.00032	5.65996
76688	Arfrp1	0.433013	0.11	0	0	0	0	0	0	0	0	0	0	0	0	0	0	12.1878	10.9724	10.6391	9.94022	7.12421	7.40328	6.93202	7.4933	5.54185	5.7115	6.03444	7.48753	5.29874	4.94297	4.11486
11846	Arg1	0.9	0.04	0.06	2.32	2.22	4.79	17.48	37.65	134.28	245.41	113.14	340.06	213.56	633.05	618.44	506.33	3.94436	4.29631	7.85867	31.2444	70.98	150.512	238.611	333.966	190.516	142.299	175.721	148.576	1035.35	655.643	832.433
234023	Arglu1	0.446724	0	1.45	0.78	0	0	0	0	0	0	0	0	0	0	0	0	55.3132	38.3767	52.5655	42.7172	28.6469	36.3725	26.8448	34.1155	28.1478	24.1734	23.559	20.9204	20.4297	9.42206	13.24
228359	Arhgap1	0.221429	0.83	0.81	1.09	0.54	0.56	0.84	0.9	0.99	1.12	1.28	1.42	0.82	0.46	0.24	0.21	13.1602	14.5125	14.6201	15.8592	11.5193	10.7351	8.86068	10.1192	10.2707	6.22546	6.0343	3.80577	3.55246	2.80823	3.20711
78514	Arhgap10	0.434568	0.01	0	0	0	0	0	0	0	0	0	0	0	0	0	0	7.47556	6.86414	5.70593	5.01514	5.39441	4.80116	4.29784	3.11091	3.12826	2.10302	2.29931	1.88119	0	0	0
70497	Arhgap17	-0.253798	0.14	0.29	0.18	0.17	0.19	0.16	0.06	0.22	1.02	0.29	0.34	0.23	0	0.26	0.67	10.9081	10.6895	9.97573	10.0079	9.07333	6.94025	5.7042	6.15383	6.35989	5.5383	4.33937	3.90644	2.83031	2.88947	2.15328
73910	Arhgap18	0.729574	0.02	0.03	0.15	0.07	0.03	0.06	0.04	0.15	0.08	0.12	0.29	0.12	0	0	0	3.64194	1.43557	4.00055	4.21982	2.23007	3.12875	3.12734	3.66809	4.59768	4.79961	3.48822	4.14038	1.75616	1.01675	0
71085	Arhgap19	0.371486	0.11	0	0	0	0	0	0	0	0	0	0	0	0	0	0	21.4046	21.3616	25.2225	20.4016	18.085	11.7035	8.01124	12.1204	8.86415	5.66105	4.70266	1.92726	1.46998	0	0
58996	Arhgap23	0.185577	0	0	0	0.01	0	0	0	0	0	0	0	0	0	0	0	27.8409	36.008	33.1856	19.685	25.5215	14.8912	18.2876	12.8163	6.74534	10.0682	9.46475	6.14071	4.19189	1.95161	1.13682
232201	Arhgap25	0.640415	0	0	0.01	0	0.01	0	0.03	0.05	0.06	0.02	0.08	0	0	0	0	2.26237	2.1114	2.2751	2.67939	3.38779	3.26513	3.91962	3.62998	3.19215	2.89041	2.49505	1.73352	1.15069	0	0
232906	Arhgap35	0.724153	0	0	0	0	0	0.06	0.01	0.01	0.01	0.03	0.02	0.23	0.02	0.04	0.03	4.06781	4.13658	3.81806	3.9561	4.60836	4.60158	4.39883	4.45159	6.31497	7.68316	6.36696	6.10859	7.27733	8.98937	8.56067
171207	Arhgap4	0.14885	0	0.04	0.06	0.07	0	0.02	0.2	0	0.04	0.7	0.28	0	0	0	0	9.46853	10.5342	9.52062	8.89849	9.76442	10.7285	8.63795	9.28294	7.99911	6.55369	6.10412	4.45896	3.86603	3.56497	3.47063
71544	Arhgap42	0.469668	0	0	0	0	0	0	0	0	0	0	0	0	0	0	0.18	0	0	0	0	0	0	0	0	1.59576	2.10142	1.71024	1.37464	2.23519	2.51359	2.68864
70719	Arhgap45	0.599135	0.1	0.06	0.1	0.1	0.1	0.08	0.1	0.05	0.08	0.1	0.06	0.02	0	0	0	18.7327	18.2056	15.4478	15.8255	19.6806	20.6729	18.1124	18.7459	13.5178	11.6052	8.92935	6.00447	3.51716	1.92416	2.38504
11855	Arhgap5	0.529122	0.01	0.01	0.01	0.01	0	0.04	0.03	0.05	0.06	0.05	0.1	0.04	0.04	0.03	0.02	1.97304	0	2.0082	2.30199	0	2.56719	3.15977	3.53932	1.89305	2.92616	3.06306	3.27034	4.09954	0	2.97011
192662	Arhgdia	-0.239286	15.33	12.16	15.73	11.15	11.59	13.76	13.59	18.59	28.75	24.71	28.31	20.99	19.81	11.68	9.73	224.141	296.35	175.618	156.904	184.418	113.298	114.998	131.508	107.91	92.481	84.8639	61.8487	66.6127	77.5619	54.6258
11857	Arhgdib	0.45219	1.44	1.27	2.58	1.82	2.1	2.61	3.86	3.23	3.05	3.15	4.25	1.62	0.74	0	0	71.7749	79.6063	67.0887	68.2339	108.748	98.3512	72.2033	107.813	68.8187	60.548	38.7587	16.6134	11.3452	7.41405	5.9393
16801	Arhgef1	-0.243292	0.43	0.31	0.28	0.3	0.23	0.24	0.57	0.2	0.3	0.54	0.39	0.29	0.23	0.33	0.48	34.6608	35.046	27.0299	28.6926	33.2227	26.1004	23.8362	29.3647	23.6456	22.4079	18.6049	17.4524	13.5481	9.97782	9.95271
72754	Arhgef10l	0.227217	0	0	0	0	0	0	0	0	0.02	0.05	0.07	0	0.02	0	0	0	2.58976	1.40218	2.78989	4.46835	4.86346	1.32092	1.76854	5.118	6.98043	1.68937	9.7181	6.80694	3.02112	7.36026
213498	Arhgef11	-0.0241473	0	0	0	0	0	0	0	0	0	0	0	0	0.01	0	0.03	2.4984	3.54806	2.44394	2.93406	3.43564	2.5728	3.2853	3.33662	3.79992	5.14073	3.3465	4.29666	3.70931	3.56795	2.84917
69632	Arhgef12	-0.0856274	0	0	0	0.01	0	0.01	0	0.03	0.12	0.07	0.06	0.13	0.24	0.12	0.15	7.66213	6.91775	11.4639	11.7619	9.83846	9.21949	7.21709	8.21994	9.047	8.18483	6.77421	9.59053	7.81395	5.50542	8.53453
230972	Arhgef16	0.185577	0	0	0	0	0	0.01	0	0	0	0	0	0	0	0	0	1.93804	2.70593	2.58346	2.93699	4.01544	4.15656	4.79327	2.4612	4.28302	4.23556	4.72883	3.03364	1.30445	2.26044	0
16800	Arhgef2	0.75002	0.37	0.41	0.13	0.2	0.11	0.12	0.25	0.46	0.17	0.37	0.12	0	0	0	0	6.31138	7.04154	5.67641	5.09706	6.13457	4.38884	4.57953	6.0926	5.14682	4.9881	4.80831	2.5425	0	0	0
268739	Arhgef40	0.838792	0.06	0.03	0.01	0.01	0.02	0	0	0	0	0	0	0	0	0	0	7.16852	6.90461	6.72546	4.7838	6.79871	2.79764	3.42951	2.04102	3.52916	4.67174	2.78687	2.47566	2.27985	1.01531	1.00818
73341	Arhgef6	0.624961	0.02	0.01	0.09	0.02	0.01	0.03	0.02	0.05	0.07	0.04	0	0.02	0.01	0	0	1.9678	1.27397	1.70125	2.04727	1.40533	2.60759	3.63778	2.86597	2.89918	3.12391	2.73853	1.65145	1.59231	0	0
54126	Arhgef7	0.356633	0.12	0.11	0.06	0.08	0.1	0.08	0.1	0.14	0.09	0.12	0.15	0.11	0.02	0.01	0	9.2872	8.86747	6.60172	5.55144	6.22736	4.8753	5.04082	4.08107	4.69998	5.29997	4.21808	3.69762	3.1762	2.39202	2.10925
93760	Arid1a	0.963869	0.19	0.16	0.08	0.08	0.08	0.06	0.03	0.07	0.06	0.03	0.05	0	0	0	0	21.3442	21.0136	19.4767	16.2055	16.8623	12.1004	10.1531	12.4008	9.85488	9.19279	7.0838	6.14139	5.69269	3.90467	4.01347
239985	Arid1b	0.743498	0.07	0.07	0.01	0.01	0.01	0.01	0	0	0.02	0	0	0	0	0	0	2.98954	2.5764	2.78125	2.45047	2.82531	1.71886	2.1568	1.18281	2.09631	2.14444	0	0	0	1.54505	0
77044	Arid2	0.779879	0.06	0.04	0.03	0.04	0.02	0	0	0	0	0	0	0	0	0	0	6.71561	4.85077	6.70335	6.02214	3.61815	4.84999	2.77269	3.99673	3.19979	2.34379	1.78074	2.12697	1.59886	0	0
13496	Arid3a	0.691738	0.14	0.06	0.07	0.08	0.06	0.08	0.03	0.11	0.1	0	0	0	0	0	0	9.89825	10.9472	9.45266	9.86912	11.6927	9.85882	9.12075	8.27201	5.69115	3.72877	2.24354	0	0	0	0
238247	Arid4a	0.339837	0	0.02	0.01	0.04	0	0	0	0	0	0	0	0	0	0	0	6.82278	2.6242	7.15419	6.96283	2.54278	6.02245	4.80593	4.84282	4.57397	4.42862	3.98828	4.07491	3.07816	0	0
23806	Arih1	0.412629	0.38	0.28	0.25	0.25	0.22	0.28	0.21	0.28	0.44	0.3	0.45	0.23	0.23	0.22	0.23	12.3895	8.27713	11.4649	9.97907	6.36953	7.38918	5.74356	6.87744	5.95344	5.75174	5.1126	4.81776	3.81018	2.99463	4.22974
23807	Arih2	-0.201665	0	0.03	0.04	0.02	0.02	0.03	0.01	0.04	0.06	0	0.04	0	0.04	0.02	1.28	14.3577	14.3345	13.8407	13.8012	12.9177	11.5588	8.54496	12.2356	8.03964	7.47639	6.82874	7.50018	7.85956	7.02336	6.97957
104303	Arl1	0.757143	0.53	0.7	0.54	0.43	1	0.74	1.17	1.59	2.09	2.92	4.47	3.18	1.55	1.41	2.23	28.5505	20.8499	27.3381	28.0046	19.5482	26.8088	30.4986	37.4997	33.4441	36.6578	38.1979	46.7565	36.177	22.4426	32.942
218639	Arl15	-0.255288	0	0	0	0	0	0	0	0.05	0.03	0	0	0	0	0	0.02	3.182	2.78077	3.43277	2.91532	1.84573	2.11156	1.65257	1.38507	1.96129	2.09381	1.88804	1.46121	1.72439	1.3333	1.86033
56327	Arl2	0.825591	2.31	0.7	0.36	0.68	1.58	0.75	1.23	0.16	0.1	0	0.13	0	0	0	0	23.1192	27.0227	18.1596	17.1691	16.313	12.5662	9.20203	9.68192	8.57	5.17978	6.54008	7.64979	3.61327	4.01721	3.51127
56350	Arl3	-0.180518	0.66	0.4	0.62	0.14	0.45	0.77	0.43	0.69	0.12	0.54	0.68	0.59	0	0.23	0.4	23.2007	19.5861	17.937	18.7676	17.4499	14.3244	13.5283	10.3404	16.0574	12.1884	13.8719	11.5948	15.6316	12.0488	11.9238
54208	Arl6ip1	-0.371154	0	0	0	0	0	0	0	0	0	0	0	0	0	0	0.84	96.4505	87.4273	107.751	105.552	88.5686	79.6382	61.3151	61.1936	74.2248	66.9121	75.884	60.4226	37.7982	57.0075	46.8721
65106	Arl6ip5	-0.655918	0.58	0.53	0.56	0.38	0.65	0.6	0.59	0.65	0.77	1.2	0.64	0.68	0.92	4.07	0.65	31.6083	34.5129	27.4096	28.4444	26.3502	25.7159	21.8622	20.5562	17.8461	19.3118	17.7222	19.8125	19.4848	22.3627	19.2542
68724	Arl8a	-0.252262	0.14	0.18	0.35	0.19	0	0.39	0	0.45	2.19	1.02	1.65	0	1.85	0	1.38	8.57887	10.9171	7.46692	7.59948	8.70856	9.01817	10.8643	10.7103	8.82818	9.28065	7.38066	7.60985	7.13639	8.73652	7.90693
67166	Arl8b	-0.489286	0.55	0.67	1	0.61	0.58	1.05	1.12	1.54	2.82	1.78	2.54	2.32	2.47	1.51	2.57	20.1534	17.0061	19.2342	18.584	14.7537	14.8984	13.5788	15.0985	14.5398	14.4225	14.3969	13.6109	12.1647	10.5933	18.5108
74252	Armc1	-0.7042	0.58	0.5	0.39	0.4	0.31	0.27	0.56	0.31	0.68	1.52	1.01	1.25	1.36	1.56	1.5	21.3539	16.2479	21.517	18.6975	11.468	11.8597	9.23994	10.5385	10.8472	9.91283	9.48687	7.40885	8.86951	6.84555	8.07067
67211	Armc10	0.285215	0.09	0.1	0.03	0.1	0.05	0.57	0.04	0.04	0.35	0	0.11	0.28	0	0	0	11.0937	7.21328	8.06234	7.96343	4.34731	4.99695	5.15892	7.4912	5.37791	5.5379	5.04189	6.66856	3.50371	1.82852	2.56454
76813	Armc6	0.792858	0.28	0.44	0.37	0.3	0.22	0.15	0.11	0.03	0.1	0	0	0	0	0	0.06	13.5526	16.8652	9.57391	8.41262	8.29311	4.71192	3.77248	3.94225	4.34282	3.81119	4.25624	2.77478	3.04292	3.99479	2.25626
74125	Armc8	0.405385	0.18	0.13	0.07	0.08	0.14	0.16	0.13	0.07	0.04	0.08	0.06	0.04	0.03	0	0	5.26478	3.7485	5.0447	4.29633	3.00473	2.93621	2.96537	3.48845	3.78882	3.76402	3.05625	2.73418	3.03815	1.65918	1.44154
71617	Armh3	0.104876	0.01	0	0	0.08	0	0.14	0	0.13	0.13	0	0.5	0	0	0	0	2.95537	3.97526	2.614	2.60636	2.82807	2.53805	1.84462	2.65903	2.48513	3.57839	2.94206	2.1985	2.80629	2.16075	1.43927
73419	Armt1	0.57144	0.06	0.49	0.08	0.03	0.03	0.03	0.02	0.07	0.06	0	0.13	0.02	0	0.05	0.04	10.414	9.15828	7.43953	6.1602	5.31012	3.45554	5.3296	5.889	5.65922	4.49382	4.34767	2.44487	2.95352	3.49179	3.16426
11863	Arnt	0.309295	0	0.02	0	0	0	0	0	0	0	0	0	0	0	0	0	12.3202	10.4808	11.0457	9.48097	9.15252	9.17703	7.75494	7.25225	7.62681	8.54213	5.72507	8.30842	6.5479	4.22107	4.66343
56443	Arpc1a	-0.367857	0.67	0.47	0.43	0.81	0.23	0.39	0.28	0.33	0.7	1.06	0.86	1.9	1.82	0.69	1.44	49.6492	50.6112	44.1776	45.0967	38.8311	30.1992	29.6134	26.15	26.3372	27.0461	27.2109	30.1956	26.1384	23.2376	20.8679
11867	Arpc1b	0.0142857	0.68	0.49	0.81	0.84	0.79	0.99	1.23	1.36	2.65	1.99	2.54	1.86	1.45	1.33	1.06	35.2136	25.7794	33.0447	31.6136	36.8462	35.0052	39.4475	40.216	34.9976	35.479	33.2392	28.243	21.2103	14.0293	16.4695
76709	Arpc2	0.0392857	6.37	4.58	4.77	3.81	4.53	5.69	6.69	8.9	15.49	12.35	13.26	12.96	11.34	8.83	9.86	113.847	83.487	92.4955	96.5062	84.0132	79.4791	83.5347	117.874	99.8935	101.993	94.28	80.7378	78.6406	51.0373	56.8473
56378	Arpc3	-0.739286	2.04	2.21	2.43	1.6	2.98	2.59	3.38	3.62	4.52	5.97	7.65	6.35	6.49	3.2	6.69	65.9895	102.466	65.1525	88.8494	53.2439	63.4416	50.8422	39.1375	61.5631	40.261	53.9537	60.5001	25.7149	48.7264	26.3464
68089	Arpc4	-0.772118	3.13	2.49	2.43	2.18	2.46	3.63	4.19	4.8	6.91	5.9	7.8	7.42	5.07	6.48	3.63	60.4086	91.0057	53.4312	51.8624	56.2179	39.0036	41.9632	39.905	34.0852	32.2743	15.9486	23.4229	24.1488	29.8126	20.3389
67771	Arpc5	-0.639286	2.82	2.2	2.61	2.36	2.62	2.23	2.97	3.23	6.1	5.25	6.14	4.3	4.02	2.98	3.48	70.9036	52.4293	66.7939	64.6012	47.125	55.2116	51.5866	53.896	44.303	43.961	40.3485	34.4557	31.5659	22.4755	25.7967
74192	Arpc5l	-0.80429	0.78	0.39	0.61	0.17	0.41	0.4	0.61	0.91	1.23	1.72	1.09	1.81	1.06	0.83	2.36	30.5596	25.2192	29.4141	24.1413	21.4412	23.4193	21.229	21.1197	21.2782	16.1826	18.4693	14.6204	19.7602	20.473	18.3609
70420	Arpin	0.23018	0	0.12	0	0.17	0	0	0	0	0	0	0	0.12	0	0	0	2.61665	3.46433	2.3421	2.85825	1.75186	2.22168	1.85583	1.55511	2.73197	3.44868	4.2427	2.53999	2.26688	3.38219	4.06995
59046	Arpp19	-0.203936	1.32	2.71	1.34	1.02	0.62	0.39	0.41	1.32	0	0.95	3.17	3.09	0	0.31	0.2	22.5008	38.6002	20.1336	19.9466	31.6226	36.6226	10.6694	10.3893	24.8066	11.5102	12.5326	10.4865	42.1484	18.9517	7.23485
109689	Arrb1	-0.0661897	0.31	0.14	0.23	0.08	0.11	0.16	0.15	0.21	0.23	0.29	0.24	0.32	0.19	0.07	0.11	87.3154	149.703	116.626	103.6	111.945	58.38	27.8911	21.0905	39.0797	13.8393	9.23499	2.57694	2.71579	1.29167	0
216869	Arrb2	-0.238783	0.12	0.12	0.19	0.23	0.09	0.15	0.12	0.25	0.29	0.4	0.54	0.38	0.13	0.13	0.15	31.9443	30.225	24.2593	25.9136	30.6775	36.7778	39.5607	40.2906	27.0756	26.5414	25.0812	21.7842	14.4573	10.7697	7.88359
11883	Arsa	-0.0919037	0	0	0	0	0	0	0	0.05	0.09	0	0.18	0	0	0	0	3.13625	3.3662	2.92071	2.35697	3.03064	2.22543	4.20536	3.40098	2.87948	3.08766	3.10553	3.59478	2.92827	7.43703	5.71203
11881	Arsb	0.778483	0	0	0.05	0.05	0	0.14	0.23	0.58	0.62	0.63	1.27	0.87	0.3	0.2	0.34	2.55905	3.05882	3.21451	4.45687	6.11485	4.20514	4.34881	4.40928	7.46157	10.3358	9.07246	8.77794	6.21453	6.70873	4.71889
74008	Arsg	0.739996	0	0	0	0	0	0	0	0	0.09	0.02	0.19	1.3	0	0	0	0	0	0	0	1.21937	1.35842	2.02383	5.7291	9.2398	14.1064	12.5807	17.3696	5.13981	11.6374	7.3805
11877	Arvcf	0.354522	0	0.01	0.02	0.01	0.02	0.04	0.03	0.22	0.09	0.1	0.83	0.3	0.11	0.18	0.03	2.53	2.95705	2.04327	2.26457	2.68525	1.97075	3.77704	3.47239	4.61396	5.16174	3.72229	3.63446	5.20889	1.0103	1.24204
57344	As3mt	0.742857	0.36	0.22	0.3	0.33	1.27	0.66	1.04	1.51	1.64	2.41	1.95	1.14	1.92	2.89	1.42	10.7955	8.78013	8.94464	9.28437	9.19675	10.6287	12.9825	11.3686	11.9097	12.0823	13.7435	13.7263	23.1687	16.8078	18.2886
11886	Asah1	0.132143	0.21	0.18	0.35	0.3	0.41	0.6	0.65	0.73	1.76	1.37	2.46	1.91	1.03	0.81	0.76	14.763	10.2073	14.937	17.9751	15.0478	17.739	20.1097	17.1129	16.6734	20.2923	15.524	15.8523	14.1505	5.98217	7.85664
13196	Asap1	0.917134	0.07	0.12	0.14	0.07	0.08	0.09	0.02	0.01	0.01	0.01	0	0	0	0	0	30.6176	26.5531	33.1128	26.2797	17.2671	14.3252	11.5279	11.3163	10.0882	4.99037	7.6392	3.66601	1.07228	1.97763	1.45375
211914	Asap2	0.319585	1.09	0.73	0.49	0	0.07	0.43	0	0.46	0	0	0	0.98	0	0	0	4.13995	2.97677	2.68181	2.17635	2.58234	2.02379	2.82995	1.57042	2.47072	2.81027	1.8085	3.82613	2.98787	2.88386	2.65735
65255	Asb4	0.476331	0	0.01	0	0	0	0	0	0	0	0	0	0	0	0	0	12.2668	3.48011	2.24162	1.88967	0	0	0	0	0	0	0	0	0	0	0
72323	Asb6	0.801584	0.35	1.03	0.03	0.11	0.4	0	0	0	0	0	0	0	0	0	0	15.8318	18.5263	16.2557	14.4619	13.0935	11.0357	8.8677	6.94795	5.40122	4.0316	4.64575	2.82704	2.70111	3.08926	2.9221
69090	Ascc1	0.37596	0	0.08	0.03	0	0	0	0	0	0.03	0	0	0	0	0	0	14.8341	16.9099	14.6421	13.671	13.5825	10.7172	11.0072	11.3374	9.82628	9.26949	7.70316	9.9811	9.64849	9.92336	6.90878
75452	Ascc2	-0.102119	0.07	0.06	0.08	0.07	0.03	0.12	0.22	0.07	0.13	0.07	0.06	0.07	0.08	0.03	0.11	15.8861	17.0162	15.5477	12.973	12.422	9.83496	10.8939	8.30639	9.12606	9.77465	9.26	8.55905	8.44636	7.61142	7.38197
77987	Ascc3	0.480428	0.13	0.07	0.06	0.05	0.04	0.04	0.04	0.04	0.07	0.04	0.14	0.02	0.04	0.02	0.01	4.23302	1.99131	4.49974	3.95787	2.05437	2.6155	2.32797	2.15136	1.80441	2.07436	1.77998	1.56729	1.76147	1.0484	1.72968
66403	Asf1a	0.836732	1.32	0.74	0.62	0.61	0.47	0.35	0	0	0	0.17	0	0	0	0	0	26.1032	18.6806	25.4479	20.564	11.3236	13.8202	8.06359	8.4048	7.59097	5.49174	5.91365	3.7786	3.70883	2.3785	2.73837
66929	Asf1b	0.795916	0.71	0.65	0.55	0.52	0	0.18	0	0	0	0	0	0	0	0	0	57.1482	52.2073	60.151	54.2312	50.772	33.2499	19.4925	17.3254	19.6945	10.9755	9.2755	2.81139	2.68701	0	0
11889	Asgr1	0.743953	0	0	0	0	0	0	1.54	2.72	10.66	12.95	13.97	13.2	12.32	9.34	12.32	2.67215	1.82812	3.13416	3.74773	3.15753	28.2546	148.244	289.489	205.696	223.692	264.624	278.843	374.31	403.87	283.36
11890	Asgr2	0.842542	0	0	0	0	0	0	0	0	1.76	2.98	3.95	4.44	5.23	2.58	3.67	7.42496	9.82037	10.5816	15.4402	18.9842	23.55	33.5732	62.6569	61.2067	83.2092	88.3406	99.6384	113.008	127.09	66.1231
23808	Ash2l	0.825591	0.26	0.17	0.09	0.12	0.11	0.06	0.07	0	0.04	0.03	0.1	0	0	0	0	23.7517	19.4629	19.8732	17.1664	12.6021	10.5365	9.67891	10.1107	10.5619	7.51615	9.21288	7.69753	6.97474	5.63234	4.83441
109900	Asl	0.939286	1.16	1.44	2.73	3.36	3.38	5.84	13.28	49.17	64.9	46.68	81.78	85.03	159.62	168.28	113.22	17.808	23.1191	19.0227	26.1381	30.8996	32.3874	55.361	80.5557	94.7123	71.8615	102.618	52.4543	276.137	228.671	128.887
56495	Asna1	0.268097	1.44	1.26	1.06	0.73	0.9	0.94	0.92	1.07	1.9	0.92	1.66	0.79	0.86	0.66	0.87	59.7862	76.0623	54.6851	44.6529	43.7601	30.0503	24.696	24.5329	28.3331	22.5465	28.4868	17.9263	21.0545	32.1786	26.442
27053	Asns	0.956995	12.6	11.04	9.66	9.54	11.12	9.33	6.9	5.41	5.23	2.88	2.42	0.68	0	0	0	140.04	157.522	130.805	110.27	109.313	70.856	57.8919	31.862	33.2706	20.6876	19.0074	9.73501	9.73964	2.12903	5.31488
11484	Aspa	0.719222	0	0	0	0	0	0	0	0	0.26	0.17	0.27	0.63	0.29	0.23	0.08	0	0	0	1.22747	1.23803	2.01321	0	2.89335	3.98541	5.09641	5.72994	4.85103	2.8987	1.1578	1.43792
68352	Aspdh	0.977659	0	0	0.12	1.04	1.2	0.8	2.47	3.3	3.67	12.32	15.53	28.2	36.6	33.55	32.83	3.67916	4.63573	6.21603	8.97762	12.8339	15.4453	23.5578	18.2739	41.8438	48.357	67.8713	60.2469	105.645	126.051	93.0599
104816	Aspg	0.86152	0	0	0	0	0	0	0	0.05	0.13	0.07	0.13	0.25	2.06	2.09	2.39	0	0	0	0	0	1.21972	7.33637	5.85835	7.05339	6.57094	4.8578	31.4788	58.4301	57.6634	61.8945
65973	Asph	-0.360714	0.34	0.58	0.56	0.48	0.88	0.99	1.19	1.6	2.38	2.5	2.6	2.42	1.72	1.12	1.21	12.2194	8.81519	12.4694	16.7743	12.5992	6.86248	8.75724	3.88313	9.08016	8.60236	11.59	9.24374	7.36299	3.55086	4.66836
68938	Aspscr1	0.478498	0.11	0.07	0.11	0.14	0.07	0.17	0.04	0.15	0.34	0.15	0.36	0.35	0.34	0.24	0.28	23.7652	22.803	12.7458	11.4013	14.6622	10.7848	17.6848	22.0139	13.4679	18.8254	25.6049	26.6054	46.3953	31.4193	25.1731
66514	Asrgl1	-0.0572965	0.18	0.14	0.16	0	0.11	0.06	0.09	0.13	0.24	0.43	0.13	0.11	0.89	0	0.29	5.36348	5.81409	5.36304	4.02719	3.29472	2.81759	2.2597	2.82824	2.23314	1.83971	1.27508	1.76009	2.68757	1.52407	1.26935
11898	Ass1	0.817857	3.74	4.22	18.41	33.57	46.06	131.7	237.03	529.85	746.08	394.51	693.71	1060.25	2533.27	3307.91	2198.64	39.4296	72.3886	59.4285	122.902	374.969	386.882	443.362	246.678	415.588	293.828	482.13	141.537	2296.75	2184.92	892.392
67979	Atad1	0.375335	0.49	0.33	0.31	0.3	0.22	0.48	0.3	0.35	0.78	0.86	0.94	1.01	1.31	0.85	0.81	14.1009	6.91196	11.5071	11.6435	6.98806	10.1989	8.96914	11.5958	12.3936	13.0978	12.6327	11.0855	11.7415	6.54282	9.66928
70472	Atad2	0.817652	0.09	0.19	0.07	0.1	0.15	0.08	0	0.01	0.02	0	0	0	0	0	0	16.7237	8.3191	16.7861	16.5489	7.03591	9.08364	5.62848	4.58035	6.46644	3.91654	4.21438	1.80231	1.80834	0	0
320817	Atad2b	0.641428	0.05	0.05	0.06	0.06	0.24	0.04	0.03	0.04	0.08	0.03	0.02	0	0	0	0	2.23801	1.04822	3.09027	2.4977	1.01244	1.19129	0	1.08532	0	0	0	0	0	0	0
108888	Atad3a	-0.646429	1.09	0.95	1.01	0.81	1.04	0.98	1.18	1.54	2.48	1.99	1.94	2.39	2.67	2.66	2.77	54.8044	61.113	34.7743	35.4116	33.2913	32.778	28.3496	40.1572	24.0886	22.9981	23.4333	21.4282	33.597	31.4991	18.2274
237877	Atad5	0.401854	0.03	0.02	0	0	0.01	0	0	0	0	0	0	0	0	0	0	7.55558	2.92867	8.023	7.58146	2.75274	5.71416	2.40916	1.96954	2.1522	1.18828	1.25267	0	0	0	0
11907	Ate1	0.635668	0.02	0.12	0.1	0	0	0	0	0	0	0	0	0	0	0	0	6.91647	4.4394	6.14968	5.26408	4.06844	3.66609	3.31798	3.69633	3.70323	4.02771	3.21967	3.39586	2.90891	1.26936	2.24742
11908	Atf1	0.374283	0.13	0	0	0	0	0.09	0	0	0	0	0	0	0	0	0	36.0804	26.6668	36.781	33.3445	21.9624	20.1084	15.0813	18.1441	17.0681	13.5025	10.1303	9.94672	10.2754	6.13029	7.27924
223922	Atf7	0.434568	0	0.02	0	0	0	0	0	0	0	0	0	0	0	0	0	2.51989	2.84831	2.70308	2.22045	2.39841	2.23562	2.27899	1.2663	1.65389	2.35866	0	1.21525	1.27567	0	0
54343	Atf7ip	0.714409	0.17	0.03	0.11	0	0.05	0.01	0	0	0	0	0	0	0	0	0	8.63032	9.57697	10.296	9.19896	9.14667	6.29153	5.08924	3.80177	4.96978	4.31285	3.05422	1.84472	2.3408	1.94932	2.05647
77040	Atg16l1	0.558304	0	0	0.02	0.03	0.02	0.12	0.03	0.03	0.18	0.12	0.29	0.09	0.02	0	0.04	9.20931	7.74667	8.96941	9.40227	7.99878	9.30491	10.7475	10.574	11.8813	11.6496	9.74046	7.47013	7.37313	6.88829	6.96186
329015	Atg2a	0.309464	0	0	0	0	0.01	0	0.01	0	0	0	0	0	0	0	0.03	7.19692	9.41673	6.61444	6.55089	8.1934	5.94573	7.19536	8.16806	4.95067	4.57848	4.78942	7.71081	7.17586	9.96527	8.00599
76559	Atg2b	0.679067	0.02	0.03	0.04	0	0	0	0	0	0	0	0	0	0	0	0	6.53849	5.71831	5.47637	4.89389	3.49525	3.84363	3.14077	3.31936	2.80648	2.38431	1.96835	2.14115	2.48752	2.12001	2.65542
67841	Atg3	0.764286	0.42	0.3	0.48	0.36	0.15	0.29	0.54	0.32	0.43	0.8	1.11	1.17	2.47	1.69	1.44	15.0648	10.8745	12.8911	11.7312	9.63715	9.94463	9.22283	13.335	15.7826	18.7332	21.9378	17.0009	24.9242	15.7793	21.2655
66615	Atg4b	-0.5916	0.17	0.2	0.25	0.25	0.21	0.3	0.15	0.4	0.22	0.46	0.23	0.24	0.72	0.66	0.68	18.2117	21.0636	18.5714	16.5258	18.3837	13.5008	12.8263	8.68189	9.82381	8.11308	8.10868	6.33967	6.64383	8.67886	6.05194
11793	Atg5	0.548296	0	0	0.02	0	0	0	0	0.06	0.3	0.44	0.7	0.94	0.06	0	0.17	8.5076	7.78065	7.94771	7.04072	5.39365	6.66206	6.44672	9.48814	9.01455	9.45077	10.315	9.13163	11.8362	12.8352	10.7673
74244	Atg7	0.811439	0.06	0.36	0.07	0.04	0.08	0.05	0.15	0.08	0.41	0.26	0.22	0.31	0.65	0.73	0.49	5.27308	6.76181	5.2172	4.6509	4.45128	3.90175	3.87816	4.68005	5.40522	6.31243	4.95958	5.44407	8.24845	14.4378	9.1872
245860	Atg9a	0.24041	0.03	0.02	0.03	0	0	0	0	0	0	0	0	0	0	0	0	18.4537	21.8576	17.6086	18.8507	25.6321	21.2787	18.5267	15.4532	12.2016	11.3143	10.7167	8.77731	15.3385	21.5115	15.3804
108147	Atic	0.85	14.86	10.62	8.53	7.12	6.98	7.13	7.2	8.11	8.57	5.8	6.61	4.57	4.28	5.19	3.67	65.2512	66.4373	45.7296	34.4746	32.4862	20.952	17.358	17.0322	16.6713	13.3707	11.6377	8.9501	8.67232	10.1923	6.088
56298	Atl2	-0.0393561	0.21	0.17	0.18	0.22	0.18	0.22	0.53	0.39	0.66	1.07	0.58	1.2	0.9	1.4	1.27	18.0418	12.1249	16.0843	16.5214	12.4347	14.0869	13.2502	20.8467	13.1377	13.6306	12.9068	17.8035	14.4775	9.54999	15.6531
109168	Atl3	0.293382	0.28	0.25	0.3	0.26	0.28	0.31	0.34	0.34	0.56	1.12	1.56	1.96	2.37	1.58	1.81	6.98794	5.8823	7.80369	6.98846	5.19147	4.01183	5.39501	5.08538	5.89697	8.19146	5.57947	10.3526	11.3744	6.3305	5.30025
11927	Atox1	0.728571	5.57	5.82	7.35	7.16	6.6	8.17	13.93	14.91	19.94	22	29.98	42.14	28.51	30.03	18.49	61.3747	84.0427	77.3689	71.9854	76.1644	62.5834	60.8181	80.0072	108.541	102.751	118.749	94.2191	178.101	165.641	145.623
76295	Atp11b	-0.309295	0	0	0	0	0	0	0	0	0	0	0	0	0	0	0.05	7.94719	4.24712	7.61457	8.72362	4.58482	7.82265	5.58814	6.09187	6.36268	2.95011	5.82816	4.8506	6.27221	1.18235	3.34137
320940	Atp11c	0.884007	0	0	0	0	0	0	0	0	0.01	0.25	0.99	1.19	2.65	3.42	3.83	2.7782	0	2.86498	2.06776	0	1.23096	1.50696	1.92674	2.91347	5.15468	5.86799	8.44913	12.9415	4.85899	14.0207
170759	Atp13a1	-0.782842	0.13	0.17	0.17	0.1	0.2	0.14	0.18	0.28	0.49	0.8	0.83	0.81	0.48	0.32	0.59	22.0497	23.6109	16.0597	16.7149	17.9716	15.8388	14.8649	16.8699	13.9705	12.8433	12.1361	10.1747	13.0823	16.6384	11.0415
11928	Atp1a1	0.0571429	1.98	1.58	1.88	1.4	2.19	2.38	3.15	3.64	5.51	6.14	7.89	9.77	7.59	7.63	7.04	78.3694	89.7719	70.444	63.3911	70.4133	50.6391	45.5511	55.4959	89.8277	84.3244	74.4635	55.6889	99.1286	72.4322	60.0944
11931	Atp1b1	0.584451	0	0.11	0.44	0.39	0.64	0.97	3.01	2.37	3.39	4.1	4.1	6.58	4.85	5.3	4.48	7.7726	7.23974	8.55298	12.5852	15.4325	23.8512	18.6084	27.1379	26.2912	28.2248	28.1631	23.9462	29.738	10.5818	14.6333
11932	Atp1b2	0.436931	0.12	0	0	0	0	0	0	0	0	0	0	0	0	0	0	44.4059	35.8413	37.3578	26.4379	19.6093	12.8001	6.25873	5.15747	6.2563	2.2321	2.06906	0	0	0	0
11933	Atp1b3	0.126899	0.78	1.04	0.53	0.61	0.64	0.57	0.37	0.45	0.51	0.72	0.55	0.57	0.87	0.28	1.16	53.3522	32.9859	42.6568	39.1499	26.9042	28.637	23.3592	26.2492	24.9285	23.7342	20.9914	19.6948	18.7859	10.0726	14.0272
11938	Atp2a2	-0.578571	1.5	1.15	1.16	1.09	1.26	1.57	1.84	2.05	4.31	5.15	5.19	5.41	3.74	3.41	2.53	57.4767	51.939	46.5409	40.6704	38.9616	28.7981	29.42	38.1003	39.1747	37.7323	28.1988	29.3007	43.4112	35.467	39.7644
53313	Atp2a3	0.26056	0.15	0.09	0.11	0.09	0.06	0.25	0.28	0.26	0.47	0.63	0.35	0.26	0	0	0	12.809	14.3922	8.25078	8.03217	16.6309	11.9055	12.0256	17.9828	10.5137	8.02989	4.81368	1.62616	1.06474	0	0
67972	Atp2b1	0.435879	0.1	0.15	0.1	0.11	0.06	0.07	0.09	0.17	0.19	0.17	0.19	0.15	0.08	0.04	0.04	8.02632	3.49285	7.57637	7.413	3.58862	5.61601	4.2093	5.88699	4.76448	5.39826	4.90311	4.70565	4.68701	1.83426	2.94671
381290	Atp2b4	0.75724	0.56	0.62	0.42	0.15	0.24	0.45	0.29	0.27	0.07	0.05	0.09	0.04	0.06	0.05	0.04	31.6073	29.6143	35.64	39.2235	33.7838	23.0218	11.8952	7.59595	10.9894	4.2726	2.78506	0	0	0	0
235574	Atp2c1	-0.185577	0	0.05	0	0	0	0	0	0	0	0	0	0	0	0	0	7.40186	3.71498	5.67168	7.68231	5.77664	4.25101	5.6326	6.02844	3.5315	5.82457	3.84163	2.7226	4.03307	2.09463	2.74133
11946	Atp5a1	-0.0964286	46.1	32.02	37.79	39.16	43.87	57.87	64.33	127.22	253.71	236.24	313.5	455.37	445.58	359.92	282.72	408.055	447.64	369.636	334.102	358.446	277.349	302.499	326.17	343.467	312.193	318.987	371.971	437.342	366.741	237.862
11947	Atp5b	-0.460714	67.86	57.96	72.97	70.91	83.4	125.31	150.63	232.82	463.88	407.05	596.12	728.51	679.63	639.29	515.63	736.094	822.443	668.965	606.559	695.367	511.499	489.213	488.348	537.72	544.23	562.727	584.146	634.331	524.589	331.296
11949	Atp5c1	0.103571	14.59	13.04	14.33	10.97	14.18	23.18	21.1	43.73	81.88	82.92	93.17	176.18	165.78	139.31	134.85	140.103	154.253	118.428	129.8	97.5181	94.0348	115.295	110.325	114.771	102.842	117.192	146.526	170.104	144.126	87.3573
66043	Atp5d	0.378571	13.44	9.34	16.34	15.09	9.9	20.73	11.73	49.65	91.47	77.05	147.64	213.77	168.84	176.7	133.22	192.793	217.965	135.843	131.088	179.56	170.702	187.88	219.914	208.004	134.067	198.861	214.858	251.869	336.753	150.024
11950	Atp5f1	-0.25	4.66	3.51	5.67	3.13	3.88	8.24	9.1	12.8	23.74	27.02	34.71	54.81	51.69	40.2	42.49	135.592	49.1396	129.401	59.5968	89.6601	57.5268	53.5072	51.7578	54.83	47.0586	61.5431	69.4103	77.0008	42.5642	46.7973
71679	Atp5h	-0.414286	11.78	10.77	14.52	12.09	13.74	24.05	23.61	39.83	87.19	65.66	103.24	120.24	126.64	121.36	111	280.191	315.777	306.055	267.991	278.792	249.617	215.03	212.787	212.925	171.293	225.12	241.253	305.424	251.051	190.266
11957	Atp5j	0.482143	5.03	6.57	6.11	5.5	6.29	7.86	18.98	16.79	21.53	43.34	35.18	53.6	39.86	69.23	33.5	108.083	80.3196	136.32	106.312	85.9711	101.247	103.745	89.6413	106.692	107.275	119.198	214.443	166.843	112.026	118.481
57423	Atp5j2	-0.192857	4.82	4.99	8.03	3.72	8.53	12.23	15.19	18.71	40.19	28.65	74.12	68.24	46.83	79.12	34.15	163.094	180.147	164.403	161.702	162.862	163.289	153.234	126.082	144.167	125.804	152.056	146.86	177.331	199.053	145.612
11958	Atp5k	-0.15	26.71	26.97	28.42	20.67	29.71	32.54	65.24	58.21	130.29	161.05	139.83	258.97	202.61	216.07	165.03	184.55	138.314	236.617	154.263	163.345	165.741	139.339	134.681	156.907	128.467	152.563	132.92	237.204	226.549	148.762
27425	Atp5l	0.275	4.02	5.57	5.53	5.13	7.6	10.93	12.23	17.44	35.4	31.32	53.22	63.83	71.11	40.81	60.65	161.301	174.825	171.512	150.646	151.051	161.931	164.48	195.974	168.721	130.91	157.071	188.539	231.767	195.562	149.954
70257	Atp5mpl	-0.433013	0	0	0	0	0	0	0	0	0	0	0	0	0	0	30.8	179.362	163.319	207.976	177.611	151.923	184.176	161.827	175.069	180.603	138.399	182.548	207.858	231.442	149.456	123.847
54411	Atp6ap1	-0.209399	0.07	0.09	0.06	0.04	0.06	0.07	0.12	0.09	0.07	0.08	0.12	0	0.08	0	0.09	36.0489	35.8472	38.1066	40.8608	38.7455	37.9736	34.3714	33.429	32.9995	30.6187	25.1434	23.4765	23.4061	25.4328	29.4157
70495	Atp6ap2	0.270031	0.04	0.04	0.04	0	0	0	0	0	0	0	0	0	0	0	0	21.0138	13.5139	22.5555	22.6076	15.6464	19.2345	17.6312	17.7641	16.4637	18.2806	16.3555	19.8037	12.4567	8.01612	11.3342
11975	Atp6v0a1	0.0269061	0.16	0.71	0.16	0.14	0.14	0.15	0.17	0.51	0.24	0.2	0.28	0.13	0.14	0.1	0.21	30.0463	38.2309	29.7291	29.0105	29.6254	22.8856	21.7283	16.4995	16.3513	13.1615	10.141	6.50784	14.1372	16.8143	14.539
21871	Atp6v0a2	0.0534889	0	0	0	0.01	0	0	0	0	0.01	0.02	0.02	0	0.01	0.01	0.01	6.7904	7.06142	5.02326	4.8062	4.62924	3.91392	3.5331	4.45404	5.28616	5.2795	4.10604	3.67794	4.03298	3.85957	4.59823
11972	Atp6v0d1	-0.565296	0.52	0.55	0.76	0.55	0.54	0.7	0.64	0.78	1.47	1.21	1.65	1.15	1.15	0.81	1.22	36.6429	48.0942	38.398	36.6029	45.092	34.7417	30.9775	30.574	34.8623	28.8929	28.7442	27.2077	31.7304	46.7117	35.4911
11964	Atp6v1a	-0.275	2.06	1.89	2.7	2.36	2.38	3.14	3.12	3.04	5.38	4.39	5.08	4.18	2.98	2.64	3.29	15.6054	12.3942	14.5896	10.5342	10.1221	10.6848	8.52232	9.40701	9.493	13.5374	9.73797	10.8297	10.1244	5.64167	7.28009
11966	Atp6v1b2	-0.446429	1.92	2.07	2.83	1.96	2.22	3.82	3.78	2.99	5.11	5.29	4.65	4.28	3.05	2.44	2.71	42.7604	42.3757	43.4288	41.3193	41.2762	37.7499	30.73	27.3246	23.8454	25.2528	21.4386	20.3965	15.433	12.8828	9.87641
66335	Atp6v1c1	-0.055506	0.33	0.4	0.61	0.28	0.4	0.57	0.43	0.98	0.43	1.5	1.59	0.98	0.79	0.23	0.77	20.485	18.642	18.8521	17.5334	13.763	14.3891	13.4039	14.1321	16.0311	16.2216	15.2451	15.2348	14.6515	9.38618	9.37357
73834	Atp6v1d	0.215055	0.41	0.22	0.13	0.25	0.22	0.46	0.32	0.35	0.78	0.73	0.39	1.47	0.57	0	0.22	30.4683	20.7258	25.4693	29.572	19.4947	21.2575	22.1049	23.705	25.7456	20.0012	22.814	21.4742	17.6699	13.4694	17.8772
11973	Atp6v1e1	0.237712	0.95	1.06	1.03	0.8	1.34	1.55	1.03	2.86	2.92	3.04	4.45	3.22	2.83	1.41	1.95	79.1084	72.9733	86.734	93.378	85.2012	86.1135	84.0593	93.6172	93.2471	82.2842	89.1205	104.431	68.6618	54.9396	46.8583
66144	Atp6v1f	-0.603571	1.31	0.87	0.88	0.83	0.99	1.18	1.06	1.78	2.71	1.96	2.09	2.27	2.31	0	1.53	86.6491	95.7336	73.8604	65.5475	63.7481	71.101	72.5651	75.3528	63.1988	57.0721	56.3966	59.8907	71.7783	90.812	63.4592
66290	Atp6v1g1	-0.387846	2.07	1.49	1.34	0.95	1.74	1.56	2.15	4.1	3.89	5.33	5.43	4.72	2.54	1.69	1.69	59.9652	53.0269	59.6014	62.1942	60.2597	87.2768	78.0085	70.4512	55.2957	41.2645	48.4479	46.1352	48.7065	47.8475	48.3967
108664	Atp6v1h	-0.109124	0.37	0.31	0.41	0.26	0.28	0.47	0.44	0.44	0.67	0.57	0.99	0.7	0.54	0.31	0.27	20.3563	16.0375	16.7963	16.2368	13.4748	14.9078	15.0105	16.108	14.6413	16.73	17.8615	15.9958	27.337	18.0527	20.0562
11977	Atp7a	0.197088	0.01	0.03	0.03	0.01	0	0.04	0.02	0.06	0.01	0	0	0	0	0	0	2.36447	0	2.78253	3.28183	3.49696	2.09287	0	0	0	0	0	0	0	0	0
11979	Atp7b	0.524245	0.35	0.33	0.07	0.04	0.12	0.1	0.03	0.06	0.1	0	0.09	0.04	0.11	0	0	10.7255	12.3066	11.6244	11.2644	12.6581	10.3941	7.36586	4.07457	6.36036	8.27955	5.44201	4.85536	3.39262	3.10375	2.21146
11980	Atp8a1	0.757779	0.02	0.03	0.02	0.03	0.02	0.03	0	0	0	0	0	0	0	0	0	10.9641	3.45362	10.9667	8.71237	3.37722	7.5235	2.92278	3.01085	3.89143	1.14738	0	0	0	0	0
50769	Atp8a2	0.741545	0	0	0	0	0	0	0	0.02	0	0.02	0.02	0.1	0	0	0	0	0	0	0	0	0	0	2.46577	0	1.55224	3.16742	0	0	0	0
50771	Atp9b	0.324258	0	0	0	0	0	0	0.02	0	0.05	0.02	0.02	0.07	0.05	0	0.05	6.24084	5.82498	5.31619	5.36029	4.44862	5.21116	5.20945	6.09471	6.37813	7.19101	6.43269	6.31815	5.56264	4.37761	4.39187
230649	Atpaf1	0.0969458	0.04	0.02	0.03	0.04	0.15	0.05	0.27	0	0	0	0	0	0	0	0	5.75117	4.24834	5.16411	4.21327	3.55178	2.96854	2.99983	2.86126	3.68607	4.79162	4.65713	3.85257	3.5519	2.61683	2.64597
246782	Atpaf2	-0.0538607	0.19	0.12	0.13	0.18	0.1	0.08	0.13	0.12	0.4	0.44	1.02	0.94	0.51	0.18	0.12	25.4613	26.6136	21.1315	19.7888	18.0187	15.2097	11.4172	11.3001	14.1216	12.1153	15.4742	12.216	12.7242	9.73766	10.152
11990	Atrn	0.371154	0	0	0	0	0	0	0	0	0	0.01	0	0	0	0	0	2.76734	1.47845	2.02703	2.94204	3.02735	3.24049	6.13143	6.15799	7.19186	7.03136	4.60968	4.72412	4.28626	2.74873	3.38612
22589	Atrx	0.368048	0.17	0.24	0.15	0.19	0.03	0.19	0.06	0.17	0.28	0.18	0.17	0.08	0.01	0	0	6.28892	1.6238	6.72364	5.54935	1.66258	3.88072	3.20315	3.76218	2.95597	4.37501	3.16792	3.22789	2.29882	0	1.70214
54138	Atxn10	0.621429	2.24	1.47	1.84	0.7	0.84	1.64	1.06	0.63	1.62	2.79	2.57	0.67	0.3	0.32	0.18	38.7645	36.4767	32.6352	33.6215	37.832	31.7114	27.1624	25.4729	26.8461	27.3609	26.8531	25.45	19.1397	16.5202	15.3214
20239	Atxn2	0.0233607	0.22	0.15	0.15	0.06	0.07	0.11	0.08	0.17	0.22	0.31	0.32	0.22	0.28	0.32	0.31	11.8091	9.16703	11.7167	9.19673	4.57199	8.16351	4.05397	10.3791	9.55728	11.8178	5.48366	9.15542	8.0326	7.10239	6.26567
233871	Atxn2l	0.961573	1.12	0.77	0.57	0.77	0.61	0.72	0.55	0.51	0.37	0.24	0.26	0.14	0.16	0.06	0.11	59.1853	57.0452	47.3028	46.7009	41.5161	35.8355	29.7279	24.5498	23.86	20.4804	21.899	17.2365	16.2047	9.34273	16.8982
110616	Atxn3	0.381123	0.14	0.14	0.03	0.06	0.06	0.02	0.07	0.08	0.13	0	0.13	0	0	0	0	5.36925	2.93208	4.64011	5.53659	2.49641	3.21712	2.68463	2.85898	2.47621	2.54621	2.18871	2.90378	2.00126	1.04494	1.76944
382423	Atxn7l3b	0.373548	0.97	0	0.91	0.77	0.84	1.46	0	0.63	1.11	0.62	2.97	1.72	0.55	0.28	0.42	39.0901	40.0252	35.5119	36.6236	32.6977	33.4846	33.118	45.3719	43.2248	47.6215	43.8941	47.5448	42.1919	29.7281	27.1131
230696	AU022252	0.903571	0.12	0.14	0.17	0	0.15	0.16	0.37	0.57	1.31	1.82	1.78	2.4	3.16	3.07	2.14	2.51974	2.94782	2.28779	1.96985	1.92421	2.31322	2.90755	3.67076	4.1025	4.07276	3.84125	4.7632	6.93877	5.8064	4.96119
11992	Auh	0.738356	0	0.1	0.16	0	0	0.15	0.25	0.45	0.79	1.14	2.02	3.05	2.32	1.84	1.77	14.0418	13.1548	16.5084	15.6696	14.2157	15.7871	13.5552	16.9859	11.6532	16.52	17.5164	31.6416	21.1957	18.0665	16.064
11993	Aup1	-0.64992	0	0.07	0.06	0.06	0.05	0.1	0	0.07	0.23	0.22	0.32	0.25	0.15	0	0.27	93.4072	108.921	89.8711	88.9217	95.1718	77.9193	66.104	75.7292	65.7841	57.0045	62.7753	54.9149	89.1895	129.535	83.3885
20878	Aurka	0.855145	0.09	0.09	0.06	0.03	0.04	0	0.01	0	0	0	0	0	0	0	0	80.1996	91.7641	82.4245	71.4493	71.3146	43.0222	26.7078	17.1058	25.6431	15.4371	18.1564	8.07608	5.39476	1.60793	1.52722
20877	Aurkb	0.887198	0.41	0.42	0.31	0.25	0.3	0.07	0	0	0	0	0	0	0	0	0	60.9758	66.9877	60.363	51.0686	56.4385	35.9327	19.3588	20.6209	22.1719	13.1172	14.5731	5.7313	4.69727	0	0
74268	Aven	0.507093	0	0.22	0	0.05	0	0	0	0	0	0	0	0	0	0	0	7.10046	8.96948	7.07047	5.29466	4.19487	3.45638	2.53861	2.72212	3.19569	2.95199	3.02067	2.36806	3.5868	3.99808	3.45045
105351	AW209491	0.380319	0.06	0	0	0.04	0	0	0	0	0	0	0	0	0	0	0	6.33476	3.92982	5.01547	4.52132	2.9662	3.99479	3.40744	4.50305	4.09123	3.39046	4.86935	2.88403	5.30722	4.75659	5.05006
106064	AW549877	-0.110657	0	0	0	0	0	0.05	0.05	0	0.05	0	0	0	0	0	0.04	4.73516	1.81848	3.48833	3.86552	2.18906	4.04184	3.68799	4.23473	3.52846	3.87645	3.94773	5.24018	5.3701	2.0023	3.34358
244810	AW551984	0.0465379	0.02	0	0	0	0.04	0	0	0.06	0.12	0.07	0.19	0	0	0	0	2.40576	1.07457	1.13576	0	0	0	0	0	1.01257	0	0	0	0	0	0
12007	Azgp1	0.760126	0	0	0	0	0	0.09	0.75	0.67	1.14	0.68	0.83	0.8	0.53	0.93	1.46	3.24085	1.60656	2.82633	8.59271	37.45	110.534	351.389	472.174	376.606	396.488	409.246	468.223	838.4	896.445	790.673
12010	B2m	0.694384	0	0	0	0	0	0	0	0	0	0	0	2.1	0	2.2	1.75	110.963	96.5951	171.325	198.992	143.866	240.857	331.296	507.365	571.454	666.928	760.385	1010.02	850.42	1606.45	1545.29
72727	B3gat3	0.309295	0	0	0	0	0	0	0	0	0	0	0	0	0	0	0.03	24.9363	31.9689	25.4413	22.904	25.5408	25.8555	23.5263	22.5038	18.4809	15.9328	15.8521	19.0956	24.2107	36.9569	27.5395
381694	B3glct	0.3211	0	0	0	0.02	0.01	0	0	0	0	0	0	0	0	0	0	3.4752	3.52568	3.61709	2.71582	2.11526	1.81419	1.36612	1.4047	1.01529	1.19459	1.14666	1.00605	0	0	0
14421	B4galnt1	0.116635	0	0	0.06	0.05	0	0	0	0.13	0.5	0.35	0.14	0.13	0.32	0	0.13	8.6173	15.5545	12.3244	18.2742	35.5053	31.7175	34.8365	40.521	27.6929	30.9116	26.2031	34.0419	59.65	55.7815	45.1536
14595	B4galt1	0.280566	0.04	0.03	0	0.15	0.1	0	0.11	0.06	0.11	0.08	0.09	0	0	0.04	0	23.3902	26.1237	23.731	25.1785	28.7631	24.257	20.3727	19.5515	17.9153	16.5288	14.2123	12.907	7.72947	10.7963	15.6157
12012	Baat	0.887861	0	0	0	0	0	0	0	0.08	0.8	0.64	1.12	0.73	7.34	7.44	10.65	0	0	0	1.4498	1.99173	4.96321	8.80656	6.6924	7.08303	6.853	13.0766	12.5108	92.8893	94.1812	98.9473
68251	Babam1	-0.320936	0	0	0.04	0.04	0.03	0	0	0	0.04	0	0.14	0.15	0	0	0.1	50.2809	69.2075	50.3156	41.5678	48.7448	32.6987	30.0679	30.9371	29.6123	26.9272	24.821	24.6465	32.614	50.2789	35.4113
107976	Babam2	-0.465953	0	0	0.04	0.04	0.03	0.11	0.09	0.05	0.12	0.09	0.13	0.2	0.16	0.1	0.12	15.7924	20.2893	14.8477	9.79229	15.1888	10.9993	9.71415	9.75527	12.7694	8.79798	11.0862	10.2836	6.6559	15.7552	9.82451
12017	Bag1	-0.57603	0.36	0.24	0.16	0.16	0.19	0.5	0.14	0.36	0.65	0.74	0.67	0.41	0.54	0.03	0.28	131.199	145.243	132.25	110.294	109.684	105.681	86.3384	91.2724	77.8698	62.0521	59.6938	73.1018	75.8551	78.7773	65.4097
213539	Bag2	0.928501	1.62	1.07	0.72	1.05	0.94	0.48	0.74	0.42	0.31	0	0	0	0	0	0	28.0584	31.4722	24.5148	19.2742	19.415	12.0607	7.18214	5.28817	6.36629	3.45019	2.96812	1.55128	1.25106	0	0
29810	Bag3	-0.100179	0.03	0	0	0.05	0.03	0.09	0.1	0.38	0.58	0.53	0.46	0.55	2.12	0.45	2.35	8.47011	8.58878	6.07618	5.71321	5.99083	4.91239	5.35351	5.03229	5.37713	5.20134	5.16223	6.20891	5.49042	15.8859	12.4387
67384	Bag4	0.0760512	0.07	0.05	0.04	0	0.05	0.03	0	0.01	0.03	0.04	0.03	0	0	0	0	3.76714	3.53442	4.01629	3.22194	2.3752	2.54959	2.13717	3.20917	2.42677	2.92284	2.37604	4.72979	3.28123	2.48675	3.16793
70369	Bag5	-0.252492	0.06	0.06	0.05	0.07	0.03	0	0.06	0.06	0.2	0.16	0.21	0.09	0.11	0.18	0.07	12.35	10.6502	10.8767	8.8249	7.20233	6.31346	6.3073	10.3921	6.65482	6.79828	8.93946	6.93765	6.8334	5.913	6.31427
224727	Bag6	0.599285	0.95	0.81	0.69	0.55	0.52	0.5	0.55	0.3	0.52	0.4	1.2	0.43	0.27	0.16	0.19	66.5045	88.8434	66.7345	48.5708	58.8076	39.0044	29.1357	30.7435	29.9283	30.0829	27.0712	29.2911	24.112	27.0684	18.417
108100	Baiap2	0.427934	0	0	0.43	0.02	0.02	0.69	0.11	0.66	0.39	0.16	0.29	0.39	0.44	0.23	0.32	4.08645	4.97034	3.21105	5.07454	7.22331	7.08365	12.9898	15.044	10.2972	13.6343	14.4646	15.2161	25.2782	10.0655	10.5678
66898	Baiap2l1	0.783159	0	0	0.01	0.03	0.03	0.06	0.04	0.34	0.15	0.09	0.23	0.04	0.07	0.05	0.07	2.32057	3.02797	2.69928	4.49711	5.18725	7.34697	8.46401	8.61605	5.4365	6.50174	9.53993	5.8956	10.3078	5.77356	7.43612
12018	Bak1	-0.220036	0.09	0.09	0.44	0.3	0.62	0.64	0	0.45	1.43	1.38	0.29	0.35	0.56	0.21	0.3	16.8978	21.146	14.3287	12.5222	14.4766	8.14144	10.8064	11.3036	10.3678	9.77654	8.28481	4.65605	4.30181	6.41846	4.08359
23825	Banf1	0.949062	8.86	14.35	3.91	6.55	6.33	2.51	2.92	2.33	2.17	1.16	2.01	1.44	0	0	0.54	202.11	243.095	184.271	157.415	129.388	113.625	82.5624	79.7969	75.6021	53.8576	61.3553	50.0724	55.804	46.2121	34.7161
53325	Banp	0.272352	0.12	0.12	0	0	0	0	0	0	0	0	0	0	0	0	0	4.26112	2.82206	5.95966	3.71733	3.25342	4.59689	3.27425	2.00322	2.58867	1.61061	1.47111	1.48547	1.0586	1.89002	0
70350	Basp1	0.409538	0.59	0.36	0.32	0	0	0.14	0.34	0.79	0.7	0.58	0.65	0.36	0	0	0	12.4985	8.34647	7.73123	6.60862	6.54414	6.94538	6.36205	4.43691	6.34566	7.71136	8.8794	2.82006	1.55791	0	1.16223
12028	Bax	0.139286	1.65	1.35	1.49	1.04	0.84	0.89	0.66	1.85	2	1.86	1.6	0.45	1.36	0.58	0.64	103.094	111.313	71.7334	65.3855	64.1281	52.1064	49.5342	39.8783	38.8258	30.272	36.8717	30.0008	31.0791	34.0927	37.1947
217578	Baz1a	0.87489	0.13	0.09	0.09	0.09	0.14	0.06	0.03	0.03	0.03	0.04	0.01	0	0	0	0	17.8005	7.64967	16.6383	14.9201	8.73364	11.9467	6.69837	7.76269	5.53499	4.3016	2.32621	1.85577	4.12085	0	2.71537
22385	Baz1b	0.880726	0.22	0.26	0.15	0.12	0.2	0.1	0.12	0.08	0.1	0.07	0.12	0.06	0.03	0.02	0.01	38.1135	32.9088	39.6895	30.6235	22.9452	21.4474	17.4014	16.1509	17.9564	14.059	12.9174	11.0432	6.66633	6.08951	7.31837
116848	Baz2a	0.626601	0.01	0.01	0.02	0	0	0	0	0	0	0	0	0	0	0	0	11.2402	10.6886	11.2542	11.0752	10.8112	9.73345	7.77827	7.65151	6.83642	5.37213	5.04442	4.77227	3.86034	2.5287	3.46226
170442	Bbox1	0.87757	0	0.01	0.08	0.23	0.13	0.45	0.54	1.68	6.23	4.45	6.39	6.38	6.74	4.61	9.85	0	0	1.85923	2.48291	2.24599	2.79847	3.67475	8.47557	6.00954	12.6866	10.6586	26.7127	21.0304	11.8704	9.82888
227707	BC005624	0.594821	1.16	0.17	0	0	0.11	0	0	0	0	0	0	0	0	0	0	33.0955	33.897	31.3811	27.6164	22.3136	22.8768	18.6506	18.6562	19.1286	17.3179	14.9147	18.2734	14.3525	14.2357	13.6353
233913	BC017158	-0.143113	0.4	0.11	0.17	0.13	0.25	0.24	0.47	0	0.16	0.16	0.28	0.61	0.22	0.47	0.2	17.043	22.4296	17.6742	14.8626	16.7192	10.1252	8.65688	8.31912	8.80832	10.4907	11.056	8.18317	7.00831	10.7094	6.91351
399568	BC052040	0.247436	0.04	0	0	0	0	0	0	0	0	0	0	0	0	0	0	5.44921	5.87897	5.87521	5.47879	4.89711	4.43527	2.86678	2.72921	4.63691	4.82561	4.17851	3.90259	2.20581	1.35435	0
57278	Bcam	0.146966	0	0.06	0.08	0	0	0.04	0.1	0.03	0	0.13	0.17	0.1	0	0	0	5.43329	7.0328	5.23437	5.93411	7.90982	5.65588	7.63881	6.66009	6.47334	5.51642	3.55235	6.26817	2.6465	1.64736	0
27061	Bcap31	0.292857	1.16	1.11	1.44	1.04	0.95	1.61	2.33	1.95	2.56	5.52	4.93	8.88	6.01	5.13	8.89	82.2576	84.2438	82.4302	70.8437	67.2576	65.3739	62.1984	64.7041	71.2587	66.3009	73.667	83.1695	80.5385	116.499	98.5374
12927	Bcar1	0.308607	0	0	0	0	0	0	0	0	0.01	0	0.01	0	0	0	0.01	8.14295	10.5166	6.39377	7.52859	14.5194	13.2557	11.4049	12.872	14.8335	17.1617	17.9152	13.4588	8.27929	15.1574	8.44614
76960	Bcas1	0.820792	0	0	0.01	0.05	0.01	0.03	0	0	0	0	0	0	0	0	0	1.95345	3.39234	3.92058	5.67473	4.53122	3.33785	0	0	0	0	0	0	0	0	0
68183	Bcas2	0.839286	2.94	1.7	2.33	1.36	1	0.88	0.47	0.83	1.58	0.82	1.51	0.63	0.39	0	0.46	96.9098	80.4113	104.426	64.7749	44.9311	53.3842	30.8549	24.9539	26.4345	20.5425	21.9303	16.1598	13.0066	10.3272	10.3222
192197	Bcas3	-0.755846	0.03	0.03	0.02	0.05	0.04	0.04	0.07	0.08	0.1	0.06	0.31	0.04	0.76	0	0.06	5.78856	8.1317	6.17266	4.19453	5.65588	6.08004	5.61724	5.55362	3.47117	2.81279	2.32943	2.70434	2.98462	8.45765	4.66245
12036	Bcat2	0.844852	0.77	0.84	0.7	0.6	0.53	0.51	0.53	0.3	0.54	0.49	0.25	0.05	0	0	0	28.8892	40.0703	27.4056	23.6983	27.8928	22.1094	17.6564	18.1035	14.937	14.3912	14.3356	12.5348	17.0358	9.3987	3.64095
66165	Bccip	0.613048	0.69	0.54	0.49	0.34	0.2	0.43	0.23	0.28	0.39	0.17	0.45	0.23	0.22	0.07	0	64.1425	52.1155	60.5478	50.723	32.022	40.7724	28.7078	31.6226	32.5971	34.6647	42.6754	40.7434	49.3974	34.9606	35.5399
12038	Bche	0.694098	0.05	0.64	0.53	0.34	0.22	0.49	0.85	0.88	0.55	1.17	1.45	2.1	2.43	0.85	0.88	2.61685	1.34888	3.13672	4.64463	2.03363	4.4657	5.9973	5.17712	8.2161	8.92515	9.48287	10.8131	10.8836	3.16523	2.54454
12039	Bckdha	0.860714	0.04	0.14	0.32	0.6	0.49	1.76	2.3	3.3	5.99	6.98	10	16.47	11.8	6.66	5.11	14.4967	21.5408	15.8727	21.0963	41.2198	41.661	67.6898	103.791	59.5641	72.3901	77.7248	135.75	139.068	190.361	100.48
12040	Bckdhb	0.935714	0.06	0.23	0.27	0.49	0.85	1.29	1.76	4.11	10.67	11.96	20.66	30.3	22.14	16.45	9.44	9.21671	9.25636	9.5149	15.2747	18.8438	24.7639	22.8185	47.0686	47.7468	56.0917	63.1952	76.1509	72.9828	23.868	27.6161
12041	Bckdk	0.697399	0.12	0.1	0	0.17	0.18	0.08	0	0	0	0	0	0	0	0	0	28.0222	35.295	24.8613	20.6842	20.029	13.1157	12.3199	10.4671	9.62089	7.78347	6.82981	5.61233	7.32905	5.905	5.41495
12042	Bcl10	0.41654	0.64	0	0.48	0	0	0	0	0	0	0	0	0	0	0	0	12.5416	15.5171	11.7864	11.6949	12.1551	11.9831	10.8843	11.1616	11.4611	9.97828	8.63234	10.7708	7.56104	6.01395	5.67799
14025	Bcl11a	0.776345	0.17	0.05	0.06	0	0.04	0	0	0	0	0	0	0	0	0	0	21.2091	17.4929	20.2734	14.474	9.49065	2.76637	4.67838	4.1371	2.59318	0	0	0	0	0	0
12048	Bcl2l1	0.354205	0.43	0.35	0.38	0.13	0.3	0.16	0.26	0.38	0	0.45	0.24	0.2	0.17	0	0.05	74.0329	110.593	101.867	116.682	138.201	109.646	57.3088	50.2524	48.2446	23.675	21.384	14.4049	17.9986	12.9114	11.4137
94044	Bcl2l13	-0.418231	1.98	2.25	0.62	0.38	0.41	0.36	2.78	2.91	1.29	1.13	1.37	3.5	1.47	2.91	2.38	18.7195	21.2472	19.2019	17.22	17.2062	11.3675	9.12933	8.99367	8.70602	8.42477	7.23652	7.74944	4.98777	3.99215	3.64656
77045	Bcl7a	0.123718	0	0	0	0.09	0	0	0	0	0	0	0	0	0	0	0	10.2343	6.71616	8.9415	6.22507	5.59092	8.02537	6.67896	4.34164	5.76247	4.26882	3.5063	3.06237	3.42589	1.93568	1.91908
12055	Bcl7c	0.316557	0.16	0	0	0.13	0.07	0	0	0	0	0	0	0	0	0	0	34.6677	48.3788	33.0857	29.5079	31.655	30.9886	30.3862	25.2062	25.3604	27.124	36.7105	21.1984	17.6202	26.9964	17.0462
72567	Bclaf1	0.499574	0.6	0.67	0.41	0.32	0.33	0.32	0.41	0.32	0.44	0.2	0.32	0.25	0.14	0.08	0.1	23.4928	7.47131	18.4501	17.1664	6.04864	12.2249	9.6674	9.93247	8.34906	8.42174	7.34018	9.04841	6.66423	1.42918	4.63883
63857	Bco1	0.414612	0	0.01	0	0	0.19	0	0	0	0.08	0.29	0.36	0	0	0	0	6.15813	5.14421	4.75728	5.61184	3.03826	4.44015	4.59818	9.92777	13.0368	12.6253	15.2343	10.74	7.11369	2.24328	3.50867
170752	Bco2	0.516398	0	0	0	0	0	0	0	0	0	0	0	0	0	1.14	0.07	0	0	0	0	0	1.00012	1.6513	1.27958	2.51933	3.68895	3.40045	6.89163	6.97213	9.36566	6.69018
110279	Bcr	-0.185577	0	0	0	0	0	0	0.01	0	0	0	0	0	0	0	0	4.52023	4.74406	3.03869	3.57191	4.61213	3.67234	3.92357	4.97819	5.87347	5.68545	5.43116	4.28546	3.51352	5.80593	4.03509
66821	Bcs1l	0.0858678	0.16	0.06	0.05	0	0.07	0.14	0.09	0.06	0.28	0.29	0.52	0.48	1.26	0.16	0.39	11.8307	13.0866	8.81	5.52035	7.0351	4.97597	4.35199	4.6292	5.37228	5.73499	6.66612	5.90954	8.79909	8.41201	7.89134
71911	Bdh1	0.725	2.04	3.44	7.8	8.47	10.66	17.69	20.37	28.13	109.61	218.79	321.85	507.55	241.12	84.86	41.31	48.9695	67.5675	69.088	72.5879	81.436	87.3186	120.666	96.6602	294.673	114.772	96.5619	176.154	101.44	105.502	55.4085
69772	Bdh2	0.441926	0	0	0	0	0	0	0	0	0	0	0	0	0	0	0.54	0	0	0	0	0	0	0	0	0	1.07561	1.03569	0	1.41382	7.23978	2.97029
56208	Becn1	0.321317	0.04	0	0.03	0	0.02	0	0	0	0	0	0.04	0	0	0	0	27.5566	23.4873	24.5355	20.1966	20.6124	28.8513	18.2646	15.6772	18.3954	12.7955	12.926	11.5383	13.9426	9.75866	15.3722
12068	Bet1	-0.142088	0	0	0.32	0	0	0	0	0	1.89	3.18	0	0	0	0	4.98	15.1103	9.28876	14.2576	15.9629	11.0991	19.8563	19.9563	16.3934	18.3403	18.5353	20.8767	20.0912	23.5962	8.75066	13.3269
54399	Bet1l	-0.162994	0	0	0.05	0	0	0	0	0	0.24	0	0	0	0	0	0	10.7403	12.4129	10.4731	10.5432	12.2404	11.8551	14.0727	17.4604	11.8359	10.6944	11.7608	10.0031	9.37341	12.2128	11.5802
19716	Bex1	0.356491	0	0.68	0.9	0	0	0	0	0	0	0	0	0	0	0	0	112.05	116.042	110.957	129.636	104.48	135.047	85.3455	82.1661	44.888	24.3896	31.2405	11.4189	5.41233	0	0
12111	Bgn	0.514286	0	0.07	0.15	0.31	0.08	0.71	0.42	0.46	0.94	0.91	1.06	1.31	0.68	0.44	0.48	19.4827	19.5012	13.5759	11.5616	20.2474	11.5059	17.2392	24.5095	33.5659	38.768	33.457	29.5302	26.9863	16.598	16.0826
12116	Bhmt	0.882143	0.91	1.52	8.77	9.89	12.12	34.93	63.16	279.43	584.75	1020.33	1391.94	1868.06	1123.56	1409.63	1159.43	13.3334	16.7301	32.5687	63.5889	76.796	144.81	171.171	541.489	801.92	868.882	1767.69	334.758	1765.46	963.102	913.091
64918	Bhmt2	0.78304	0	0	0	0	0	0	0	48.66	135.92	233.47	308.34	395.99	208.64	173.62	119.24	8.50748	12.1976	14.5785	23.6384	29.3725	39.8381	60.0561	66.8698	84.2051	90.8362	106.496	59.8864	113.246	81.4175	63.1671
76895	Bicd2	0.845939	0.07	0.05	0.05	0.04	0.01	0.05	0	0	0	0	0	0	0	0	0	8.22684	6.84014	6.48505	6.8506	5.15829	4.85834	3.93857	3.87309	4.60649	3.63109	3.0983	2.32681	2.13964	1.78555	2.02062
12122	Bid	0.153709	1.35	1.36	0.61	1.43	1.05	0.96	1.16	0.53	0.66	1.25	1.28	0.41	0.86	0	0.61	8.37289	8.43234	8.97816	7.292	6.56892	6.89931	6.08696	8.74546	6.53965	5.86173	5.68632	7.05807	3.57447	3.93175	3.29796
30948	Bin1	0.585714	1.69	0.98	0.92	0.89	0.44	0.55	0.2	0.93	0.66	0.3	0.69	0.07	0.21	0	0.05	16.3722	14.7762	11.6419	11.3117	12.941	12.4706	13.5069	10.6622	13.2946	11.6353	11.6661	9.2905	7.20513	8.14879	6.45446
668218	Bin2	0.941913	2.14	1.13	0.97	1.08	0.7	0.65	0.78	0.9	0.49	0.31	0.47	0.04	0.05	0	0.04	32.5769	26.0228	21.4491	21.1783	21.4516	14.9872	19.009	20.7451	16.0457	12.0989	10.6316	2.97671	2.41534	2.07141	4.40881
11799	Birc5	0.787403	0.56	0.41	0.15	0.18	0	0.06	0	0	0	0	0	0	0	0	0	168.595	172.793	187.348	163.439	129.253	113.656	68.4184	56.8234	67.4682	42.6959	41.4136	21.9798	11.8451	0	0
12211	Birc6	0.728811	0.12	0.08	0.06	0.08	0.06	0.08	0.03	0.03	0.05	0.05	0.04	0.05	0.03	0.02	0.04	3.00118	2.39812	3.53324	3.45798	1.68902	2.21079	1.86945	1.88609	2.72433	2.27618	2.20486	1.9847	1.80089	1.40316	1.9403
12144	Blm	0.624212	0.01	0.02	0	0.18	0.01	0	0	0	0	0	0	0	0	0	0	15.6358	8.40295	14.1241	13.9835	7.78222	8.22123	4.51186	3.7223	4.99998	2.3827	1.76775	0	1.04911	0	0
104184	Blmh	0.0428571	1.87	3.32	2.83	3.17	2.42	3.57	10.56	1.3	2.11	3.25	2.3	10.17	9.64	6.51	1.48	34.693	27.7713	28.2141	21.7814	19.5541	16.2249	18.2685	18.3927	16.2918	24.5468	11.1136	21.8451	18.1719	11.763	9.56025
14533	Bloc1s1	-0.595247	0.14	0.03	0	0.12	0.08	0.12	0	0	0	0.1	0	0	0	0	0.05	38.3832	42.6258	47.7919	46.3182	48.8261	52.3029	50.5644	66.8612	81.3607	75.7311	87.6237	88.9507	98.5147	87.8288	70.3294
73689	Bloc1s2	-0.18636	0	0.33	0	0	0	0	0	0	0.14	0	0	0.48	0	0	0	21.182	15.5632	19.2847	18.4538	12.061	16.754	12.178	17.0944	10.9774	10.5211	11.9417	11.0227	12.3241	9.54511	10.5596
232946	Bloc1s3	0.0893509	0	0	0	0	0.04	0	0	0	0	0.08	0	0	0	0	0.09	5.12974	7.3569	4.20982	4.49309	5.01184	3.68566	2.49943	4.14243	3.19979	3.3461	2.32442	3.12212	2.62616	3.53715	3.64897
117197	Bloc1s4	0.205252	0.03	0	0	0	0	0	0	0	0	0	0	0	0	0	0.06	15.2686	16.1768	12.1494	13.6228	13.2336	12.5074	10.9347	11.3734	9.48591	9.34472	10.7113	11.4696	8.97986	12.5632	11.4546
17828	Bloc1s5	0.247436	0.04	0	0	0	0	0	0	0	0	0	0	0	0	0	0	12.2363	12.2992	12.4547	11.9655	10.1746	8.71078	7.72281	10.578	11.9913	12.1147	10.6685	10.5462	10.6444	12.3578	7.31597
109778	Blvra	-0.0464286	1.97	2.17	2.28	2.53	2.03	2.31	2.23	2.66	3.56	4.08	6.01	4.33	3.32	2.07	1.85	21.9835	19.9931	20.7933	26.1169	11.0893	12.2944	12.1675	10.3844	14.342	8.69461	8.36836	11.9257	14.3522	7.03883	7.01222
233016	Blvrb	0.482143	56.21	56.97	68.35	55.81	64.38	43.63	28.97	31.11	37.34	49.65	59.77	51.07	42.02	28.84	46.03	495.144	668.568	566.79	529.405	568.448	386.134	248.777	135.867	161.567	102.991	111.669	125.236	85.0532	111.706	67.4612
140780	Bmp2k	0.795985	0.1	0.14	0.05	0.05	0.05	0.04	0.02	0.21	0.02	0	0	0	0	0	0	22.7468	13.6398	20.4106	19.1032	13.9414	12.8659	6.97905	4.98996	5.44276	3.27845	3.11732	1.4937	0	0	0
213895	Bms1	0.909078	0.09	0.13	0.06	0.05	0.03	0.01	0	0.05	0.03	0	0	0	0	0	0	23.693	14.364	17.2116	15.4541	9.30506	8.10106	6.73851	8.46907	8.10036	7.36499	6.15321	5.09962	5.59673	3.06224	3.58895
224630	Bnip1	-0.330653	0.41	0.8	0.53	0.34	0.28	0.09	0.54	0.45	0.86	2.18	0.57	0.7	0.65	0.8	0.72	13.881	25.5991	17.4069	17.8143	16.8345	13.3341	15.4216	13.8119	8.94061	13.032	16.625	16.9812	17.3587	13.3244	9.90956
12175	Bnip2	-0.066405	0	0	0	0	0	0.01	0	0	0	0	0.03	0	0	0	0	25.493	20.4875	23.1236	19.6412	15.3852	20.9816	18.1428	21.1696	20.4975	23.3771	15.7525	17.4147	18.9259	7.20636	12.596
12176	Bnip3	-0.247436	0	0	0	0	0	0	0	0	0	0	0	0	0	0	0.13	21.6334	13.707	21.5768	30.8438	58.8314	100.688	101.874	39.7325	40.5048	37.7311	42.7897	81.856	61.7328	29.726	23.1865
69556	Bod1	0.211289	0	0.04	0.03	0	0	0	0	0	0	0	0	0	0	0	0	15.2644	16.3014	11.3534	11.1576	10.4237	10.3711	9.74936	13.3936	14.9843	13.8646	15.4566	16.1037	13.4793	16.1001	12.2882
665775	Bod1l	0.378946	0.07	0.05	0.08	0.04	0.04	0	0	0	0	0	0	0	0	0	0	6.34913	2.27384	6.46778	5.82679	1.77642	3.93133	2.92206	2.86629	2.63068	2.54592	2.35294	2.70912	2.07698	0	1.95877
69168	Bola1	-0.0857143	2.86	3.95	3.05	2.73	0.79	3.58	0.97	2.94	4.84	2.15	9.57	11.39	13.22	1.9	4.39	31.914	38.8793	24.9428	20.7688	21.4724	17.7211	18.721	23.1533	17.3601	14.9981	19.392	18.1738	26.2403	31.3727	20.4767
66162	Bola2	0.30563	3.19	2.94	2.9	1.44	2.55	1.74	3.02	1.85	3.51	1.85	1.66	1.13	1.04	0.6	0.86	51.3462	60.4386	39.3036	36.1672	34.3833	34.5189	27.3189	28.666	19.0504	12.0808	14.75	12.924	23.4795	29.2723	24.8711
78653	Bola3	0.203372	0	0.31	0.15	0.1	0	0	0	0	0.24	0	0.34	0	0.37	0.63	0	26.2071	18.0991	18.4361	13.8596	13.1945	14.1445	10.6685	11.3549	12.0942	6.38769	11.7744	6.1014	13.677	10.0206	9.75303
12181	Bop1	0.713506	0.53	0.75	0.38	0.17	0.3	0.17	0.21	0.16	0.18	0.05	0	0	0	0	0	34.509	44.7726	22.1292	18.3628	18.2025	10.3464	10.0087	11.5791	10.4921	8.93388	7.73092	4.98675	11.2779	14.014	8.95366
67774	Borcs5	0.185577	0	0	0	0	0	0	0	0	0	0	0	0	0	0	0.1	4.61669	7.10121	4.66103	4.18489	3.70593	2.74075	3.12012	3.55338	4.26377	3.3303	2.60386	2.06089	3.69572	6.86881	4.31363
12183	Bpgm	0.23235	0.57	0.65	0.78	0.92	0.79	0.91	1.9	1.59	0.68	0.73	0.63	0.57	0.43	2.13	0.89	58.8293	62.0978	85.8372	95.1865	92.4618	105.286	76.9329	36.4703	50.7032	25.786	19.5155	7.16139	7.49641	5.12347	3.96163
68021	Bphl	0.971429	0.28	0.39	1.25	1.1	1.65	3.62	4.51	4.16	10.88	14.4	22.32	37.03	38.85	38.44	33.95	13.1696	20.4877	17.2862	25.5672	32.6766	38.9379	42.7783	43.2259	58.5512	77.2108	78.793	83.1225	84.6518	98.7408	59.8334
23827	Bpnt1	0.771429	0.28	0.33	0.48	0.39	0.45	0.79	1.14	1.41	2.98	2.3	3.61	3.62	5.89	7.55	6.02	9.10679	7.29343	6.73879	7.19828	6.35282	6.24087	7.44604	8.99659	8.86639	11.0896	12.776	9.99963	18.4871	22.6643	17.6574
207165	Bptf	0.309295	0	0.02	0	0	0	0	0	0	0	0	0	0	0	0	0	6.5969	4.97787	5.88703	4.93981	3.30892	3.82721	3.31147	4.51958	3.41516	2.92465	3.35127	3.85439	2.31091	1.33434	2.01316
109880	Braf	0.452264	0	0.01	0.02	0.03	0	0	0	0	0	0	0	0	0	0	0	2.27231	1.13813	2.19324	2.22879	1.28811	1.43422	1.13682	1.10837	1.1175	1.08084	0	1.12388	1.13934	0	1.17169
72399	Brap	0.146538	0.03	0.06	0.01	0	0.03	0	0	0.2	0.07	0.07	0.03	0	0	0	0.06	12.0826	12.201	10.3893	8.38518	10.5532	9.91486	9.4525	20.0581	9.21253	15.1489	13.689	26.3828	18.5859	17.7279	17.7307
231841	Brat1	0.812467	0.04	0.03	0.02	0.03	0.02	0.02	0	0	0	0	0	0	0	0	0	3.96116	4.26677	4.01961	3.85072	4.38726	3.7008	2.3066	2.85884	2.71743	3.29791	2.20143	3.19964	1.90649	2.78033	2.08874
12189	Brca1	0.577516	0.01	0.01	0	0.02	0	0	0	0	0	0	0	0	0	0	0	9.33514	5.55528	10.494	8.66525	4.16824	5.21439	3.0796	2.31807	3.70992	1.96179	1.54051	0	1.04982	0	0
210766	Brcc3	-0.136079	0.42	0.29	0.25	0.24	0.18	0.18	0.3	0.31	0.47	0.35	0.45	0.51	0.57	0.3	0.57	4.49279	1.765	4.69909	5.52473	1.84751	3.67626	3.4939	1.9649	2.88886	2.93794	3.21156	2.07107	2.44054	0	2.98258
14312	Brd2	0.871357	0.12	0.15	0.12	0.1	0.1	0.06	0.05	0	0	0.04	0	0	0	0	0	46.146	40.8856	37.3919	32.282	29.1907	29.9961	22.1633	24.0795	20.2737	17.8851	16.4658	17.3394	17.7112	12.5374	18.9965
67382	Brd3	0.687558	0.26	0.23	0.41	0.2	0.09	0.15	0.07	0.12	0.25	0.1	0.09	0.1	0.07	0	0.03	20.2152	21.1553	18.4536	17.1521	12.775	14.671	14.9336	18.1279	11.8223	14.6333	15.3146	16.8722	11.9375	7.56804	5.44699
57261	Brd4	0.722877	0.13	0.2	0.07	0.13	0.09	0.11	0.13	0.06	0.09	0.12	0.08	0.04	0.05	0	0.03	12.9266	18.4391	13.3087	12.1849	14.4218	10.7884	8.86038	8.81247	9.80995	6.17323	5.97221	5.81136	4.31508	4.52858	4.95706
26992	Brd7	0.765443	0.19	0.14	0.1	0.03	0	0	0	0	0	0	0	0	0	0	0	26.0515	20.0078	21.53	20.3027	15.579	11.7225	10.887	12.3793	11.4221	9.10956	10.777	7.67064	9.05934	6.80515	7.45658
78656	Brd8	0.725781	0.02	0.03	0.02	0.02	0.02	0	0	0	0	0	0	0	0	0	0	20.2521	13.2523	17.7674	17.6682	12.6587	13.8973	9.96905	7.96838	6.0772	5.70732	6.16475	4.55756	3.4074	1.74373	2.52198
105246	Brd9	0.662406	0.02	0.01	0.01	0	0	0	0	0	0	0	0	0	0	0	0	16.3995	12.0125	14.1278	12.5587	8.29421	9.96479	7.32736	9.28646	8.17128	7.93874	7.52616	7.20994	6.16793	2.83105	3.27927
72308	Brf1	0.501056	0	0.02	0.06	0	0	0	0	0	0	0	0	0	0	0	0	18.8334	17.1881	17.3555	16.7998	13.9348	14.5914	11.7385	13.5814	10.2125	8.51252	7.60394	8.65602	8.20843	3.7968	5.26065
76809	Bri3bp	-0.343164	0.48	0.3	0.67	0.41	0.17	0	0.19	0.46	0.56	0.42	0.35	0.67	0.64	0.36	0.89	10.4526	13.1097	8.27547	7.94545	8.17269	6.71813	5.81655	5.17223	3.88036	3.63944	3.18213	3.85392	3.62926	6.25976	3.25565
67832	Brix1	0.624926	0.22	0.2	0.11	0.04	0.09	0	0	0.06	0.08	0	0.02	0	0	0	0	21.4043	9.33138	16.8598	15.0129	6.49878	10.7768	8.5941	9.42208	8.10486	6.88418	7.56213	6.10006	6.49382	2.37873	5.70586
101314	Brk1	0.329743	0.41	0.2	1.2	0.38	0.55	0.34	0.86	1.04	0	0.47	0.23	1.49	0	0	0	67.6748	75.3112	64.9779	58.9626	60.8335	52.6671	54.8372	59.4417	48.864	42.7427	42.0021	44.2671	47.1446	46.6143	33.4687
71678	Brox	-0.0498906	0	0.05	0.07	0.03	0.04	0.07	0	0	0	0.11	0	0.11	0.06	0	0.08	9.79732	6.82486	10.1876	10.0457	7.2366	7.06181	6.08605	7.70758	7.92496	7.87222	6.52632	6.29719	6.0777	4.67835	4.70109
14705	Bscl2	0.309295	0	0	0	0	0	0	0	0	0	0	0	0	0	0	0.03	15.3114	21.8129	14.3999	13.2376	16.1715	12.306	10.3996	15.081	14.7033	12.2112	12.1363	12.3648	28.3463	39.589	22.4509
100383	Bsdc1	0.44884	0.14	0.24	0.65	0.15	0.13	0.14	0.08	0.27	0.12	0.08	0.14	0.04	0.1	0	0.12	34.756	37.9568	46.5666	46.6603	39.4617	50.9731	37.3539	14.6584	25.6353	14.7961	12.4382	12.5909	11.5932	15.9909	18.1725
12215	Bsg	0.132143	8.06	6.61	6.12	5.69	7.04	8.31	13.92	13.8	15.52	24.53	23.1	33.77	11.32	11.58	4.68	511.998	645.435	519.709	556.853	707.578	594.814	552.754	411.731	500.608	507.168	714.882	689.35	408.121	427.742	271.49
69550	Bst2	0.510576	0	0	0	0	0	0	0	0	0	0.58	0	0	0	0.56	0.4	23.2769	35.5646	30.8446	27.0213	20.2416	37.5592	100.486	58.2877	72.8742	75.8707	79.9741	86.5169	128.274	373.972	304.883
107182	Btaf1	0.72075	0.27	0.38	0.09	0.1	0.12	0.06	0.03	0.16	0.08	0.11	0	0.01	0	0	0	10.9997	6.40443	11.7212	9.72501	4.78632	4.91227	3.46895	3.14783	4.2116	2.74393	2.46201	1.60375	1.69374	0	1.42384
26363	Btd	0.606881	0	0	0	0.01	0	0	0.32	0.05	0.04	0	0	0	0.23	0.24	0.23	5.97268	10.1539	7.94232	10.4935	15.6279	18.6806	28.6793	21.5326	15.0326	21.0458	21.1582	32.2511	30.3669	43.1473	34.5031
218490	Btf3	0.860714	5.96	4.36	6.54	5.38	5.45	2.1	5.53	1.71	1.94	1.41	0.74	0.64	1.6	0	0.62	467.112	386.904	427.373	349.931	236.932	258.798	214.246	238.43	195.733	149.032	165.004	158.768	151.23	118.661	117.136
70533	Btf3l4	-0.164286	1.99	1.41	1.28	0.88	1.04	1.19	0.92	2.62	2.95	4.17	5.03	4.49	5.7	6.73	4.03	13.8239	9.92324	13.4955	10.257	4.62052	6.32967	8.04365	12.2927	7.87682	8.91008	7.02233	7.83891	10.2908	5.88968	7.90495
12229	Btk	0.891418	0.29	0.21	0.09	0.06	0.08	0.05	0.14	0.02	0.05	0.05	0	0	0	0	0	16.0722	10.6341	10.6397	8.21583	8.3075	5.86735	4.82322	7.7372	4.60284	3.46183	2.78066	0	0	0	0
192194	Btnl10	0.312094	0	0	0	0	0.03	0	0	0	0	0	0	0	0	0	0	13.9467	15.6698	24.2006	19.7655	18.658	16.2617	13.6009	10.4781	15.8965	4.323	4.06473	0	0	0	0
12234	Btrc	0.185577	0.02	0	0	0	0	0	0	0	0	0	0	0	0	0	0	12.3445	13.6666	14.6544	14.0369	12.7396	10.7721	8.23433	5.99706	6.44995	5.47356	4.80683	4.27062	2.34509	2.30365	1.79231
12235	Bub1	0.454326	0.01	0.01	0	0	0	0	0	0	0	0	0	0	0	0	0	17.4125	6.23002	15.0994	12.7131	4.74621	7.08598	4.18332	3.38122	4.14586	3.3208	3.61611	1.14939	1.12334	0	0
12236	Bub1b	0.775303	0.11	0.08	0.04	0.02	0	0	0	0	0	0	0	0	0	0	0	35.4079	29.9525	31.8718	26.6868	23.4979	14.4572	10.5436	9.08407	10.7766	7.50851	6.7918	2.91815	1.53996	0	0
12237	Bub3	0.535714	4.31	5.14	3.32	2.26	2.7	4.97	1.65	2.44	3.28	5.82	3.44	2.49	1.73	0.96	1.3	69.5518	68.2441	67.754	54.6238	47.5632	38.8081	28.1332	30.2439	31.3588	21.6464	22.9084	14.2827	16.0933	14.5141	11.8016
215051	Bud13	0.433013	0	0.02	0	0	0	0	0	0	0	0	0	0	0	0	0	8.23447	8.85017	5.97053	5.84628	5.57972	4.61049	3.97827	3.54645	3.3489	3.25663	3.07915	2.54521	1.86056	2.46966	2.81472
66138	Bud23	0.737942	0.65	0.23	0.47	0.11	0	0	0	0	0	0	0	0	0	0	0	30.5175	39.5183	44.9345	21.9188	17.1664	21.3472	16.9138	16.5756	17.9873	15.6021	23.4373	9.6039	20.6901	19.4006	11.5538
231889	Bud31	0.609756	0.66	0.89	0.47	0.4	0.34	0	0.14	0	0.51	0.28	0	0.18	0.28	0	0	65.3968	59.4998	66.7132	56.8435	39.4815	46.5733	42.544	35.6931	42.4021	33.6733	39.8903	29.0188	33.9786	28.5337	30.6173
53414	Bysl	0.890786	0.62	0.56	0.4	0.25	0.29	0.07	0.08	0.28	0.17	0	0	0	0	0	0	23.4293	28.185	16.3035	15.1464	14.1307	9.07422	6.71964	7.77261	7.60594	5.63865	5.98215	2.37353	3.71177	7.68561	5.51239
66882	Bzw1	0.546429	4.1	4.41	2.56	2.11	2.13	2.42	2.7	2.51	3.61	4.04	5.21	2.95	2.43	1.38	0.92	78.7447	42.4052	65.7203	58.6008	29.3858	40.1528	35.6733	41.8909	43.0047	45.1828	41.4478	35.0902	32.0684	16.443	20.234
66912	Bzw2	0.866846	1.01	0.49	0.31	0.36	0.27	0.41	0.32	0.24	0.33	0.15	0.07	0.07	0.03	0.01	0.06	43.5105	38.5275	30.3494	24.4289	19.0303	14.6513	14.82	13.7279	9.19365	6.76589	6.29603	4.23336	6.65617	3.38078	3.01658
223665	C030006K11Rik	0.292469	0	0	0	0.02	0	0	0	0	0.16	0	0.4	0.23	0.46	0.32	0.11	10.7924	11.9161	6.73655	7.12798	10.9809	9.32415	7.98691	11.9975	7.58092	8.14438	10.0716	8.63855	14.6667	28.9101	13.1267
12260	C1qb	0.433013	0	0	0	0	0	0	0.04	0	0	0	0	0	0	0	0	26.0881	37.7935	36.2686	48.4421	78.0074	74.8835	117.017	110.943	93.9048	92.6306	89.2004	55.4033	55.5371	64.8722	52.212
12261	C1qbp	-0.232143	11.5	6.8	7.57	4.59	4.8	6.12	5.82	9.52	10.93	7.43	12.32	9.45	9.9	7.31	9.5	217.626	221.234	167.871	133.353	111.219	93.0565	70.3474	72.6474	73.5338	54.3203	65.9122	47.3588	68.5766	64.1964	41.601
12262	C1qc	0.155726	0	0	0.05	0	0	0	0	0	0	0.21	0.24	0	0	0	0	20.4289	22.6391	25.7439	34.6906	60.5572	60.3056	97.5607	93.4868	82.5241	85.9675	72.4999	42.6294	43.2599	48.9508	38.8178
50909	C1ra	0.553975	0	0	0	0	0	0	0	0	0	0	0.05	0	0	0.04	0.03	3.39337	5.30286	8.4887	12.5553	18.407	21.7815	30.6074	40.0263	55.0341	74.9529	61.6424	74.6107	62.5057	138.734	101.026
232371	C1rl	0.572937	0	0	0	0	0	0	0	0	0	0.19	0.24	0	0	0.11	0.28	3.10083	5.71366	6.03533	7.2643	10.817	9.03872	15.3986	16.9897	27.6103	35.8969	36.8278	43.7855	41.9066	59.6619	42.2022
50908	C1s1	0.622392	0	0	0	0.01	0	0.03	0.05	0	0	0.07	0.05	0.13	0	0	0.02	12.2381	9.98677	21.0257	34.9365	46.191	70.6785	75.5292	72.0231	109.687	154.886	136.101	152.21	102.345	111.77	128.967
12263	C2	0.144593	0	0	0	0.01	0	0.01	0	0	0	0.03	0	0	0	0	0.04	4.20555	6.173	6.93187	12.5211	17.0047	14.4205	15.0296	17.7311	23.5635	31.692	22.1277	40.63	18.7462	51.0978	35.3665
207781	C2cd2	0.710441	0	0	0	0	0	0	0	0	0	0	0.04	0	0.84	0.53	0.56	1.98469	1.72612	2.08026	1.68778	1.88467	1.89736	2.24333	4.58758	4.8933	6.51286	5.70744	8.08291	15.0215	16.4618	9.72883
71764	C2cd2l	-0.495259	0	0	0	0	0	0	0	0	0	0.01	0	0	0.03	0	0.04	9.16186	10.8783	10.5101	10.1841	10.907	8.10335	6.3355	10.71	8.14135	9.51991	10.8128	7.48982	5.08301	6.24425	6.21819
74741	C2cd5	0.408529	0	0.01	0.01	0	0	0	0	0	0	0	0	0	0	0	0	12.2644	10.1506	12.7638	14.2003	10.3145	10.1308	6.61745	6.3458	5.81138	3.72323	3.48592	2.42092	1.46783	0	1.11894
12266	C3	0.835714	0.03	0	0.53	0.43	0.73	1.83	2.87	1.56	4.08	8.03	5.79	4.99	5.27	3.61	2.64	60.0217	81.3125	121.521	224.964	346.269	479.656	823.075	1123.47	1520.46	2052.55	1389.3	916.808	1515.04	1450.96	1673.15
77644	C330007P06Rik	0.33698	0.1	0.18	0.09	0	0	0	0	0	0	0	0	0	0	0	0	7.88274	3.79201	6.89201	6.78413	3.61347	4.60794	4.49383	3.54791	5.15345	4.28529	3.97984	4.35523	4.18692	1.7456	3.46171
12268	C4b	0.838101	0	0	0	0	0	0	0.11	0.06	0.33	0.33	0.34	0.24	0.52	0.31	0.35	1.43786	1.26374	2.29174	6.73681	18.4167	31.8785	100.798	110.579	113.43	138.582	110.87	166.212	161.828	380.385	333.46
12269	C4bp	0.696877	0	0	0	0	0	0	0	0	0	0	0	0	0.29	0.18	0.41	0	0	0	1.79903	1.50604	2.15641	3.78165	2.5888	23.0537	39.2247	46.8638	40.6393	121.901	143.013	189.515
12274	C6	0.440959	0	0	0	0	0	0	0	0	0	0	0	0	0	0	0.18	0	0	0	1.19921	2.30757	1.76865	0	2.84109	3.25579	3.6214	2.35633	0	2.7625	67.5223	110.376
97130	C77080	0.371154	0	0	0	0	0	0	0	0	0	0	0	0	0	0	0.04	1.22665	2.12525	1.88341	2.84275	4.70535	4.9337	5.85933	4.03083	6.61518	7.79064	7.3768	6.98214	6.97928	15.1917	9.10719
230558	C8a	0.733545	0	0	0	0	0	0	0	0	0	0.07	0	0.01	0.04	0.08	0.34	4.77783	3.69597	6.94635	9.43215	8.72512	13.7225	21.2884	25.8352	52.0651	63.4104	59.3968	40.9164	37.7653	144.132	228.197
110382	C8b	0.773906	0	0	0.06	0.1	0.18	0.65	0.83	0.09	0.04	0.03	0.01	0.05	0.15	0.12	0.24	3.65219	5.54063	13.4767	27.7591	51.9468	68.9582	96.6305	28.5944	42.0289	43.1809	39.6275	19.9087	48.6492	199.601	180.104
69379	C8g	0.835603	0	0	0	0	0	0	0	0	0	0.16	0	0.22	0.33	0.61	0.92	8.25359	10.1805	16.9401	23.2471	40.9697	51.7389	46.2236	46.381	87.4041	105.754	101.441	141.189	186.957	456.862	253.949
12279	C9	0.434568	0	0	0	0	0	0	0	0	0	0	0	0	0	0	0.25	0	0	1.0518	3.36007	4.23754	7.10461	1.41645	0	3.03927	8.18457	8.50309	11.2123	11.7397	240.486	346.247
12283	Cab39	0.225201	1.98	2.12	1.22	1.58	1.22	1.37	1.65	1.99	1.44	2.45	1.87	2.49	2.64	0.61	0.89	16.459	10.7906	15.4128	14.6135	10.3992	12.7866	9.73684	14.6218	10.6369	11.8427	10.1077	11.0833	9.39775	5.18668	8.72465
69008	Cab39l	0.754821	0.15	0.12	0.13	0.12	0.13	0.11	0.12	0.13	0.12	0.25	0.27	0.3	0.27	0	0.51	10.658	7.25613	10.7077	9.49018	6.177	6.36281	8.53993	10.0757	10.0451	11.0806	11.2317	12.5445	17.6023	10.0367	10.4405
70312	Cactin	0.860159	0.02	0.04	0.04	0.01	0.03	0.01	0	0	0	0	0	0	0	0	0	35.1557	45.5256	33.1531	29.9422	26.7143	19.612	15.5441	13.7758	12.513	9.36369	9.06012	6.05907	6.9397	6.0986	6.35403
12301	Cacybp	0.839286	16.96	8.61	6.62	8.53	9.96	5.76	3.44	3.56	4.21	2.25	3.53	2.03	3.2	1.19	1.83	79.0328	34.0502	49.597	44.3566	15.9201	25.0868	17.314	14.6617	16.172	13.8019	18.0341	11.8341	11.4268	4.20137	9.47872
69719	Cad	-0.9	2.08	2.11	1.46	1.43	1.65	2.54	5.05	17.63	34.43	20.55	44.3	48.23	86.35	91.97	58.23	40.6624	47.7277	24.5488	19.8335	23.0243	9.22471	7.83512	5.92341	7.52115	5.01748	4.46954	2.10684	3.41915	3.0769	3.55591
54725	Cadm1	0.158279	0	0	0	0	0	0	0	0	0.03	0	0.08	0	0	0	0.04	3.87466	2.52886	3.65741	3.39587	2.36373	3.32821	2.9544	7.31406	5.4615	7.04517	5.89981	7.62802	3.71529	4.13812	3.35154
54598	Calcrl	0.123829	0	0	0	0	0	0	0	0.07	0	0	0	0	0	0	0	3.24939	1.34747	2.39044	2.57886	1.77325	2.57137	2.43303	3.22621	3.32326	4.65078	3.81015	3.24699	2.19382	0	0
109624	Cald1	0.49866	0.78	0.99	0.97	0.65	0.99	1.35	1.94	1.59	2.28	4.16	3.67	4.25	4.36	1.55	3.21	7.75236	14.3478	4.64711	22.7622	15.8346	13.1768	24.2555	9.74052	37.7035	10.232	30.7659	41.294	15.996	24.3932	23.1521
12317	Calr	-0.132143	55.68	41.96	46.19	52.42	52.49	82.72	113.1	97.29	175.99	184.96	203.03	168.89	136.7	116.21	114.97	328.288	418.582	309.569	287.352	347.229	290.277	296.276	191.658	404.8	251.778	295.176	166.064	348.838	560.985	545.917
12321	Calu	0.278571	4.71	5.04	5.27	4.74	4.25	8.15	11.94	8.74	11.22	13.05	17.47	15.7	9.17	4.65	3.34	47.7578	35.1143	43.7963	45.5614	32.0804	37.7263	46.0862	29.1013	41.9705	42.9555	35.7395	35.6155	31.6968	20.6638	24.0347
52163	Camk1	0.458784	0.07	0.1	0.1	0.06	0.09	0.1	0.15	0.08	0.12	0.39	0.27	0.25	0.32	0.04	0.34	5.96579	8.19224	5.85166	7.28702	7.08905	7.11413	8.33333	6.78614	10.2813	8.8923	8.92556	10.7297	7.51241	5.66183	5.03957
227541	Camk1d	-0.343762	0	0	0	0	0	0	0.01	0	0	0	0.05	0	0	0	0	0	0	0	0	0	1.28686	0	1.63777	2.0541	1.78983	0	1.19931	0	3.36042	1.02328
108058	Camk2d	0.388659	0	0.02	0.03	0.03	0.02	0.03	0.11	0.06	0.12	0.26	0.22	0.14	0.12	0	0.06	0	0	0	1.32058	1.33807	1.97902	2.52941	2.20009	2.02753	2.85153	1.15609	0	0	0	0
12325	Camk2g	0.443223	0	0.02	0.03	0.05	0	0.03	0	0.06	0.04	0.05	0.07	0	0	0	0	5.96833	4.84585	3.85245	3.61968	3.13857	2.51676	3.17711	3.72215	3.54263	3.45367	3.23867	2.76026	2.20305	1.97219	2.06561
12796	Camp	0.871774	0	0	1.37	1.95	1.06	4.12	13.59	2.67	1.3	3.99	2.26	0	0	0	0	14.5555	15.5999	31.4552	75.9055	222.928	330.628	266.601	302.06	148.072	165.054	101.582	4.50223	0	0	0
71902	Cand1	-0.475	2.15	1.9	1.68	1.32	1.5	1.65	1.79	1.99	2.45	2.34	2.98	2.87	2.57	1.81	2.33	15.7336	13.3614	11.5162	10.5928	9.24986	6.27923	5.80258	6.86424	6.57387	6.97976	5.39195	3.70629	4.68028	4.44314	4.25373
67088	Cand2	0.784138	0.26	0.19	0.09	0.08	0.07	0.09	0.09	0.04	0.04	0.09	0.14	0.08	0	0	0	6.22199	5.15812	2.73445	2.51661	2.45094	1.31343	0	0	1.7857	3.12135	2.77788	1.6865	0	0	0
12330	Canx	-0.417857	8.38	6.09	7.67	5.53	7.6	9.64	9.89	9.65	16.47	14.63	17.22	15.5	15.69	10.13	10.61	109.858	72.7694	101.96	97.2371	57.2333	76.4349	64.051	50.1725	72.5387	65.9249	57.5232	49.8896	64.4493	43.8992	57.4998
12331	Cap1	-0.185714	3.92	3.2	4.57	3.25	3.14	4.51	6.67	6.77	10.12	10.37	11.01	8.04	6.27	5.32	4.25	45.9911	39.6472	35.3794	34.1818	39.574	35.849	38.3964	36.2287	35.0908	36.0838	36.9806	30.7769	23.2619	21.2125	20.8461
12332	Capg	0.465953	0.54	0.52	1.2	0.46	0.84	0.95	2.35	0.62	4.44	1.9	5.64	0.08	0	0	0	7.5001	7.61387	7.61307	7.97224	12.2107	9.57433	9.1829	9.1439	7.57972	6.1782	4.87488	2.73678	1.36004	1.79195	1.45598
12333	Capn1	0.917857	0.86	1.26	1.18	0.79	0.77	1.06	0.57	0.66	0.41	0.53	0.4	0.23	0.24	0.38	0.32	41.9957	59.1326	46.9321	44.3691	57.3006	30.717	18.4718	10.3787	12.8933	9.5433	8.09768	4.04568	4.28664	9.60201	6.93643
12334	Capn2	0.436104	0.38	0.38	0.44	0.5	0.57	0.88	1.21	1.05	1.47	2.29	1.71	1.8	1.26	0.53	0.91	17.1924	14.5711	12.9947	14.5606	16.1107	14.0841	14.5809	14.0591	22.4827	25.7403	22.0947	16.6954	13.0196	9.84906	9.65215
12337	Capn5	0.792663	0.11	0.08	0.05	0	0.08	0.06	0	0	0	0	0	0	0	0	0	15.1282	19.373	13.1838	11.8457	12.4369	5.81699	3.97278	3.43821	4.2252	2.73469	1.82095	1.47307	0	0	0
12338	Capn6	0.683613	0.13	0.07	0.04	0.06	0.03	0.04	0.05	0.06	0.26	0.26	0.75	0	0	0	0	12.169	4.96553	6.48059	6.09793	3.29102	4.03597	3.8844	4.78244	5.62363	5.12203	3.43552	2.88153	0	0	0
12339	Capn7	-0.309295	0	0	0	0	0	0	0	0	0	0	0	0	0	0	0.02	9.96096	4.84003	8.12489	7.88454	3.45893	6.86607	5.74301	5.65689	5.00851	6.74392	5.27914	6.22646	5.36651	2.30488	3.97552
12336	Capns1	-0.448435	1.31	1.2	1.43	1.75	1.4	1.79	1.75	1.75	2.61	1.88	1.81	2.02	1.16	0.63	1.16	115.632	109.058	76.8598	70.2706	118.154	77.992	69.4028	48.9518	48.6745	48.9777	48.6353	43.9252	42.8994	103.331	51.53
53872	Caprin1	0.760714	6.13	4.39	3.68	2.75	3.14	2.45	2.1	2.52	2.58	2.94	2.09	2.51	3.59	1.7	1.97	94.2105	67.566	76.1041	74.1924	54.5023	44.2244	34.9118	34.5497	47.9977	44.6301	41.6312	31.62	33.7966	25.2237	22.0932
12340	Capza1	0.0821429	4.3	3.62	3.78	3.32	3.04	3.68	4.93	4.4	5.95	4.52	6.35	4.64	3.6	2.49	2.69	31.7717	24.6561	28.0759	25.1998	18.3636	16.7426	15.2097	14.3618	15.3916	13.5378	10.8438	8.50606	6.00222	4.81323	5.5959
12343	Capza2	0.0285714	2.97	2.67	3.56	3.71	3.5	4.42	5.69	5.73	7.21	7.38	9.65	9.69	6.3	5.34	5.67	27.6688	15.5603	21.3426	25.6494	17.5484	20.7952	10.8556	24.6754	22.4422	25.4593	17.9068	21.3224	16.4076	9.07492	11.7157
12345	Capzb	-0.0821429	6.3	5.6	5.42	8.18	5.15	6.75	8.53	8.29	10.5	10.31	12.22	10.38	8.07	7.32	5.05	39.7208	27.5742	77.9096	72.5058	88.8957	71.2528	65.973	66.1729	28.8464	65.0184	65.6682	52.0722	36.4129	41.7356	31.2704
12346	Car1	0.114286	0.49	0.47	0.57	0.6	0.7	0.86	0.91	1.51	2.44	2.59	3.24	0.81	0.42	0.58	1.37	10.0929	8.01119	11.1415	13.1979	13.2328	10.3861	9.25239	30.5472	15.5981	6.92861	4.92858	0	1.63	3.37373	1.55051
23831	Car14	0.509175	0	0	0.1	0.08	0	0.14	0	0.09	0.17	0	0.19	0.34	0.53	2.24	1.42	4.06316	7.23815	4.56599	6.50861	7.3458	7.57026	6.19034	4.22717	8.93549	11.2261	18.8509	6.02403	18.4099	37.3259	8.51839
12349	Car2	0.957143	100.19	110.26	121.33	110.04	105.3	70.86	77.06	30.3	28.21	36.15	23.39	23.84	19.14	14.57	11.94	952.707	966.056	1242.15	1126.13	873.357	862.431	531.322	253.463	384.606	142.213	158.794	30.8684	25.4165	7.37677	4.44358
12350	Car3	0.335714	0.13	0.84	6.89	10.99	11.7	18.08	20.74	21.36	16.46	13.62	10.04	94.97	318.78	1144.98	2739.94	5.46504	16.174	42.6771	94.5621	52.9645	61.2599	13.9681	11.367	70.3094	134.559	276.738	12.9747	90.6485	1142.43	442.602
12352	Car5a	0.808516	0	0	0	0	0	0	0.08	0.11	0.03	0.23	0.53	1.86	3.57	4.44	2.52	0	0	1.0331	2.8937	5.81215	9.68714	10.2418	1.28061	9.15965	13.6439	23.915	6.34063	43.0203	46.8868	27.7271
12319	Car8	0.821437	0	0	0.02	0	0	0	0.03	0	0.06	0.11	0.22	0.37	0.29	0.23	1.02	0	0	1.35804	2.58279	4.0355	5.04563	3.32634	2.73853	5.65879	8.0308	7.65893	11.4277	17.7116	10.2964	6.2922
52502	Carhsp1	-0.777783	0.78	0	1.55	0	0	1.61	2.22	1.03	2.12	2.58	5.22	5.51	4.71	3.46	3.05	35.0696	45.2187	50.5903	49.214	55.6641	48.8624	41.4217	44.7055	46.7526	35.2809	33.825	29.4531	24.0452	29.538	18.4797
59035	Carm1	0.863805	0.96	0.55	0.3	0.31	0.42	0.39	0.23	0.16	0.15	0.11	0.06	0	0.25	0	0	40.3796	50.9075	30.7425	29.4586	32.0911	22.8397	15.6649	15.1068	16.1951	13.5424	13.1408	12.0685	9.64691	10.8351	8.49218
68732	Carmil1	-0.347111	0.02	0.02	0.01	0.01	0.01	0.02	0.04	0.05	0.13	0.04	0.04	0	0	0	0	0	0	0	0	0	0	0	0	0	0	0	0	0	0	1.27354
67383	Carnmt1	0.754557	0.37	0.21	0.17	0.08	0.19	0.12	0	0.19	0.07	0.05	0.06	0	0	0	0.06	19.7521	12.2035	16.816	13.9222	7.42977	6.00904	5.9071	4.92375	5.95161	5.43128	4.55542	4.41841	3.93884	2.9237	3.47764
27267	Cars	-0.371761	0.96	0.92	0.83	0.73	0.8	0.77	0.96	0.58	1.47	1.66	1.75	2.22	1.58	1.55	1.05	33.0947	28.1831	25.3149	21.3309	21.9768	14.746	12.5429	10.0953	14.559	10.8495	11.6675	14.2195	11.8973	11.9284	8.44946
71941	Cars2	0.00943027	0	0	0	0.14	0	0.05	0.03	0	0.15	0	0	0.03	0.07	0.07	0.1	13.3219	15.9604	12.6364	9.75941	9.28434	6.67531	6.84418	5.87231	7.17926	6.48068	5.39056	4.77733	8.06963	9.48057	7.07552
192160	Casc3	0.54935	0.03	0	0.02	0	0	0	0	0	0	0	0	0	0	0	0	20.1641	19.4443	17.6901	16.0558	15.0686	11.7235	10.3354	9.95999	8.2013	6.69381	5.95716	6.12242	5.72722	4.71922	5.53269
319996	Casc4	0.158378	0	0.09	0.14	0	0	0	0	0	0	0	0	0	0	0	0	6.83957	1.03719	4.62781	5.01577	0	1.02431	2.70704	0	1.26973	2.9561	1.84058	4.37897	1.50377	0	0
12361	Cask	0.496614	0	0	0	0	0	0	0	0.04	0.04	0.06	0.18	0.16	0.07	0.03	0.21	0	0	1.24624	0	0	0	0	1.0694	1.19254	1.14327	1.02521	1.26695	1.42851	0	0
12362	Casp1	0.597194	0	0	0	0.04	0	0	0.02	0	0.07	0.07	0.03	0	0	0	0	1.11813	0	1.26341	1.65236	0	1.78343	2.2486	3.26501	2.55645	2.90211	2.78946	1.83182	1.30615	0	0
12366	Casp2	0.738602	0.03	0.04	0.14	0.23	0	0	0	0	0	0	0	0	0	0	0	15.8895	12.757	14.8748	12.5782	9.01923	7.19868	4.92704	5.50698	5.53354	3.92496	3.35367	1.92813	2.33404	0	0
12367	Casp3	0.8873	5.56	3.73	3.71	2.89	1.96	1.96	1.6	1.5	1.2	0.6	0.92	0.88	1.23	0.6	0.98	36.7267	31.9568	35.2429	25.3378	13.2783	10.0783	8.87451	6.68459	7.43177	8.07251	5.73208	5.047	6.06129	4.58876	5.0244
12368	Casp6	0.557853	0.91	0.82	0.87	0.67	0.99	1.03	0.99	0.99	1.48	1.67	1.86	1.62	1.63	0.7	0.7	13.6442	12.7619	13.5617	12.9429	9.46395	11.6197	9.36894	11.4887	13.7368	13.6156	13.052	25.2771	15.3443	5.50917	5.31955
12369	Casp7	0.215833	0.06	0.07	0.04	0.07	0.05	0.07	0.19	0.18	0.12	0.29	0.91	0.27	0.09	0.12	0.12	8.8262	8.6655	7.46736	7.1109	6.15993	5.70247	6.71695	5.7266	8.17158	9.46405	10.5505	6.96422	8.00458	7.65277	6.31532
12370	Casp8	0.778571	0.12	0.23	0.25	0.19	0.17	0.15	0.24	0.46	0.89	1.64	1.57	1.29	1.01	0.64	0.58	7.8064	5.00673	7.90629	7.04551	4.27493	5.94121	7.58496	11.438	11.9575	14.5178	12.7259	14.8029	8.2682	5.26264	8.20761
12371	Casp9	-0.371154	0	0	0	0	0	0	0	0	0	0	0.06	0	0	0	0	6.18392	6.28854	5.88152	5.31637	5.06777	4.3706	3.93628	4.67136	4.5043	4.00429	3.10067	3.61364	3.26702	3.63423	2.22314
12380	Cast	-0.316354	0.42	0.31	0.46	0.17	0.18	0.29	0.21	0.59	0.89	0.4	0.46	0.45	0.37	0.39	0.43	19.0944	12.5913	22.4594	24.8043	15.2761	17.0911	11.5961	11.2707	11.4244	10.4078	9.4636	8.68325	7.6521	4.24469	5.86336
12359	Cat	0.95	7.86	7.63	17.27	14.81	16.87	25.69	45.91	45.79	105.75	165.23	192.49	344.75	429.92	437.17	380.85	81.0566	73.0092	94.5666	127.25	164.036	165.281	141.662	139.657	165.744	252.584	293.907	385.084	494.511	867.347	548.578
19285	Cavin1	0.321079	0.07	0.19	0.19	0.21	0.03	0.12	0.4	1.06	0.46	0.57	0.42	0.34	0	0	0	12.7062	9.1537	9.67949	9.79831	16.1593	16.7291	15.5784	11.2884	11.782	11.0522	8.8882	7.22202	4.84189	1.82282	1.28008
20324	Cavin2	-0.0535714	0.06	0.2	0.09	0.27	0.28	0.53	0.55	0.61	0.97	0.57	0.11	0.13	0.35	0.03	0.86	13.1637	7.90662	10.4336	10.2535	7.1508	7.26463	8.11573	11.6521	9.92703	12.6933	9.41408	8.85139	8.34785	1.75657	1.45275
12398	Cbfa2t3	0.596316	0.04	0.02	0	0	0	0	0	0	0	0	0	0	0	0	0	6.67459	7.42937	4.87498	5.38668	5.29008	1.95253	2.06525	1.98369	2.6516	0	1.12209	0	0	0	0
12400	Cbfb	0.695524	0.72	0.37	0.18	0.3	0.16	0.31	0.63	0.36	0.6	0.65	0.32	0	0	0	0	12.2496	8.59473	7.57786	8.71393	6.69477	8.1439	7.03283	9.35213	7.8444	7.49081	6.45893	4.34566	5.50578	3.99861	3.8751
12402	Cbl	0.794989	0.1	0.08	0.03	0.07	0.05	0.04	0.02	0.02	0	0	0	0	0	0	0	2.61603	1.21945	1.41318	1.63997	2.37661	0	0	2.30221	0	0	0	0	0	0	0
12408	Cbr1	0.910714	1.74	1.28	1.45	1.14	1.58	2.55	5.59	14.71	36.08	36.26	64.89	51.18	55.03	27.56	15.9	17.0079	18.8863	16.0281	16.898	20.9441	30.1217	51.82	135.625	86.162	97.6087	153.558	125.471	173.755	69.383	43.1823
109857	Cbr3	0.314606	0	0	0	0	0	0	0	0.69	2.72	1.34	2.35	0	0	1.14	0	0	0	0	0	0	0	0	1.132	0	0	1.25413	0	1.18413	0	0
234309	Cbr4	0.846429	0.54	0.95	1.16	0.42	0.91	2.35	1.15	2.83	4.22	8.28	13.64	12.59	9.64	4.65	5.91	6.98983	4.46766	6.67183	7.31128	5.22966	8.14087	9.4297	13.3987	14.0752	18.1138	19.8404	27.713	18.6608	9.27593	9.02969
12411	Cbs	0.846429	0	0.11	1.32	1.38	1.84	5.21	6.11	6.41	10.68	9.19	11.43	14.8	25.34	18.84	13.11	5.59027	11.8571	13.236	26.7337	63.4405	53.9197	57.4035	57.8213	89.2315	74.6325	90.7374	46.4906	231.094	250.37	200.352
226043	Cbwd1	0.156196	0.07	1.09	0.07	1.1	0.04	0.69	0.69	0.1	0.56	0.53	0.1	0.1	0.02	0	1	5.75901	3.11737	4.63894	4.66434	2.08678	2.0959	2.1341	2.00627	2.73378	1.76774	3.21296	1.91823	2.21658	0	1.79627
12412	Cbx1	0.846429	6.73	6.49	4.99	3.83	4.32	4.41	3.23	4.17	5.46	3.12	2.91	4.21	3.02	1.37	0.55	28.9053	30.0648	34.4782	27.8196	19.3741	26.5344	19.8295	15.6827	21.0291	16.7417	14.1769	15.7416	10.3566	5.10914	9.3606
12417	Cbx3	0.378737	0	9.67	5.31	3.68	6.52	0	0	0	4.2	0	0	2.33	0	0	0	53.4634	34.6747	51.9194	64.8903	26.776	39.2812	20.5321	30.0378	22.4486	18.0262	26.0078	17.6343	11.8351	5.82771	6.00844
12419	Cbx5	0.971332	8.08	6.53	5.84	4.21	3.6	3.11	2.5	1.7	2.63	1.8	1.28	1.32	0	0	0	31.5375	23.7836	32.1485	26.5388	17.3374	15.1623	9.32565	8.56757	10.3672	6.93237	5.98362	4.36345	3.61092	1.05023	2.04157
212139	Cc2d1a	0.332025	0.01	0.02	0	0	0	0	0	0	0	0	0	0	0	0	0	4.23966	5.68762	3.92508	3.77984	4.4222	3.34317	3.19426	4.41833	3.81539	4.563	4.43634	4.08288	4.20703	5.78214	3.80343
319965	Cc2d1b	0.604367	0.04	0	0.11	0.05	0.06	0	0.07	0.46	0	0	0	0	0	0	0	12.4508	10.3855	9.6888	8.4628	6.70636	7.11713	7.47933	7.70521	5.39265	5.67729	5.44743	4.997	5.65978	4.23827	3.60799
67500	Ccar1	0.505809	0.83	0.92	0.54	0.53	0.43	0.56	0.38	0.48	0.96	0.46	0.62	0.51	0.52	0.25	0.25	28.2387	9.68354	23.7561	24.1695	7.46766	20.5378	12.7951	17.8789	11.5727	10.3343	11.1263	11.0609	10.1276	2.55296	6.57385
69668	Ccdc115	0.679874	0.35	0.17	0.21	0.2	0.05	0.07	0.16	0.19	0.17	0.19	0.2	0	0	0	0.07	21.2166	15.2608	15.011	14.4483	12.1935	12.0005	9.75525	10.387	8.70214	7.2381	9.7985	7.2045	6.12834	4.47483	5.00401
104479	Ccdc117	0.433013	0.09	0	0	0	0	0	0	0	0	0	0	0	0	0	0	10.1704	8.31217	9.83759	8.51824	6.22741	6.73623	5.72262	4.51648	4.37144	4.15102	4.17356	4.17238	4.47835	3.64218	4.24789
72654	Ccdc12	0.54935	0	0.16	0.12	0	0	0	0	0	0	0	0	0	0	0	0	60.0767	63.0995	50.8624	49.9391	44.8467	40.6834	37.1102	40.5953	31.8611	29.1463	35.2904	27.6812	30.9682	31.8495	20.753
234388	Ccdc124	0.492857	0.96	1.9	0.84	0.91	0.38	0.45	0.42	0.21	0.82	0	0.94	0.87	1.48	0.54	2.77	99.7966	129.795	89.2044	80.4379	72.6864	51.9631	42.1165	42.4852	52.9249	36.2886	49.9611	32.055	58.6292	80.6688	61.4654
67433	Ccdc127	-0.371154	0	0	0	0	0	0	0	0	0.03	0	0	0	0	0	0	5.25613	3.64971	3.52355	3.90318	2.36048	3.64228	2.12231	2.15591	2.02981	2.30348	2.56036	2.70174	2.27152	2.06255	2.00102
76457	Ccdc134	0.501056	0	0.06	0.04	0	0	0	0	0	0	0	0	0	0	0	0	6.75556	6.71122	6.56516	5.35337	3.77045	3.96347	4.01808	3.67775	3.14789	1.80744	2.71361	1.7474	2.19407	1.88836	1.63862
67291	Ccdc137	0.371154	0	0.08	0	0	0	0	0	0	0	0	0	0	0	0	0	9.9007	9.35658	9.34196	9.19743	5.77083	7.2183	5.7907	4.8184	4.35333	3.61124	3.83637	3.17433	3.55688	1.49406	3.20405
68597	Ccdc167	-0.0765532	0.35	0	0	0	0	0	0	0.28	0.41	0	0.56	0.82	0	0.21	0	9.22295	9.62471	2.90629	7.94157	2.21174	3.91919	7.03556	4.50474	2.31651	2.09647	1.6325	2.44052	1.16813	5.33375	2.37793
54638	Ccdc22	-0.652368	0.22	0.24	0.15	0.2	0.22	0.17	0.13	0.21	0.33	0.44	0.45	0.54	0.3	0.34	0.5	15.4321	17.4608	13.2485	12.1156	11.3571	9.21375	7.72849	6.85649	6.96076	5.04145	5.20707	6.07787	4.92995	6.93018	4.72705
67179	Ccdc25	0.135714	1.19	0.64	0.59	0.66	0.56	0.79	0.63	0.94	0.55	1.08	0.92	1.73	1.14	1.3	1.61	14.923	8.08085	13.0745	12.2571	5.6803	9.49306	9.89057	10.1504	11.3261	10.0603	12.2731	8.88911	10.3623	9.45032	15.1664
52715	Ccdc43	0.236561	0.24	0.51	0.41	0.12	1.39	1.14	0.18	0.27	0	0	0.35	0.34	0.65	0	0.39	10.9381	7.2191	6.56542	6.36771	5.5105	4.78017	3.77669	3.69361	4.74141	2.8618	3.64029	3.58812	2.88873	3.60281	3.65103
67163	Ccdc47	-0.05	0.26	0.31	0.15	0.21	0.3	0.4	0.52	0.61	1.19	1.42	1.99	1.55	1.57	2.06	1.89	13.4373	5.88245	12.2335	12.9234	6.51314	13.6652	11.6325	10.1889	10.2642	13.5549	12.3519	12.9403	13.1617	5.68913	12.8041
67501	Ccdc50	0.728258	0.19	0.15	0.18	0.12	0.05	0.07	0.09	0.07	0.05	0.09	0.15	0.27	0.12	0	0.02	8.05974	5.6901	6.77517	6.81011	4.45371	4.81413	4.86035	6.4826	6.61033	5.87736	5.82758	7.00537	5.76673	2.31628	3.37098
66658	Ccdc51	0.0250898	0.12	0.23	0.29	0.11	0.07	0.18	0.1	0.16	0.29	0.29	0.35	0.47	0.38	0.21	0.28	5.98891	6.95841	6.19873	4.60319	4.30072	2.89747	3.06401	3.16098	3.52174	4.06672	4.56114	3.19062	3.62597	4.35818	4.41807
381045	Ccdc58	0.123324	1.36	1	0.99	1	1.12	2.05	2.51	3.42	5.06	5.75	7.1	6.1	4.3	4.61	11.17	18.8575	11.9793	17.6523	13.2999	9.41228	11.8205	12.8988	14.8809	13.6984	10.8612	16.328	15.5766	17.0061	12.7186	15.7085
76551	Ccdc6	0.577125	0.21	0.15	0.11	0.13	0.24	0.2	0.08	0.24	0.27	0.05	0	0.14	0	0	0	11.7454	11.6224	11.9144	10.0074	7.72634	7.43117	4.82629	5.85528	5.12088	4.34927	3.72681	4.45676	2.91491	3.19619	5.17865
72123	Ccdc71l	0.185577	0	0.05	0	0	0	0	0	0	0	0	0	0	0	0	0	20.4672	18.8467	21.7243	24.4035	23.1869	17.3117	10.734	7.42081	9.44226	4.31007	4.10758	2.52477	1.52593	1.10664	1.32081
668158	Ccdc85c	0.332025	0.1	0	0.01	0	0	0	0	0	0	0	0	0	0	0	0	5.03379	6.60857	4.29941	4.33817	4.98969	3.52976	1.2564	2.35252	3.65213	4.81198	2.66411	1.77455	2.63671	4.31883	2.2457
108673	Ccdc86	0.719608	0.6	0.57	0.16	0	0.15	0	0	0	0	0	0	0	0	0	0	14.8947	17.8285	10.6616	8.14443	7.30705	5.443	4.50241	8.42252	5.15708	4.39148	5.15222	3.18751	2.90514	4.9216	3.7352
108686	Ccdc88a	0.619041	0	0	0.2	0	0	0	0	0	0	0	0	0	0	0	0	1.49578	0	1.51167	1.2795	0	0	0	0	0	0	0	0	0	0	0
78317	Ccdc88b	-0.186243	0	0	0.02	0	0	0	0	0	0	0	0	0	0	0	0	3.19345	3.25206	2.17007	2.89041	4.70117	4.94517	4.58295	3.8617	3.29207	3.20135	3.15264	1.13625	0	0	0
243846	Ccdc9	0.748763	0.23	0.24	0.11	0.25	0.09	0.25	0.24	0.14	0	0	0	0	0	0	0	14.4953	15.662	12.6407	9.93961	10.3378	10.4385	10.1677	14.9246	8.41584	6.86576	6.62088	7.98136	5.436	4.62296	5.1236
66365	Ccdc90b	-0.3183	0	0	0.11	0	0	0	0.18	0	0.08	0	0	0.12	0	0.05	0.23	8.44658	6.39961	8.45227	8.82217	4.18805	5.35749	4.25369	5.763	6.72922	7.22362	6.37821	5.45032	4.40161	2.62321	3.40202
70829	Ccdc93	0.0464058	0.01	0.05	0	0.03	0	0.08	0	0.26	0.37	0.38	0.19	0.15	0.11	0	0.11	2.65488	1.59676	1.81482	2.01862	1.28763	0	0	1.57843	1.29339	1.4881	1.49865	1.25913	1.06182	0	0
52132	Ccdc97	0.771162	0.05	0.06	0.05	0	0.03	0	0	0	0	0	0	0	0	0	0	16.1841	22.172	15.7036	14.5671	16.1459	13.2352	12.1654	10.8246	9.49679	7.53919	8.00826	6.5947	7.02143	10.1894	9.40442
216527	Ccm2	0.424598	0	0.04	0.04	0	0	0.01	0.02	0	0	0	0	0	0	0	0	23.1071	28.8628	20.655	21.5771	18.415	16.5104	12.7167	18.1355	14.9111	11.3616	11.9417	8.87974	7.11928	10.6809	9.61225
12428	Ccna2	0.842838	0.29	0.21	0.19	0.06	0.13	0.02	0	0	0	0	0	0	0	0	0	122.057	95.3693	138.599	129.628	82.0741	72.5883	43.4222	33.8986	43.1964	23.4719	21.0629	9.03467	4.87577	0	0
12442	Ccnb2	0.247657	0.04	0	0	0	0	0	0	0	0	0	0	0	0	0	0	94.1009	96.5328	109.498	108.279	89.2462	61.7472	41.63	40.9583	43.6484	27.4775	28.0813	15.771	5.61713	0	0
12443	Ccnd1	0.585571	0.08	0.05	0	0	0	0	0	0	0	0	0	0	0	0	0	36.6843	40.2457	26.2121	19.7437	15.5511	12.2415	9.06232	9.03738	17.2514	32.4729	23.2319	17.0519	18.9536	7.71251	3.73392
12445	Ccnd3	0.839509	0.29	0.3	0.21	0.14	0.05	0.09	0	0	0.03	0	0.1	0	0	0	0	244.932	332.563	240.716	226.387	194.604	139.842	92.1557	104.6	76.937	54.319	62.2709	35.6412	16.7632	18.7932	6.23912
12447	Ccne1	0.4334	0	0.01	0	0	0	0	0	0	0	0	0	0	0	0	0	71.3512	84.6225	68.478	48.9345	34.1905	26.2404	15.1613	14.457	21.9677	10.2033	11.9703	2.67345	2.17337	0	0
66671	Ccnh	0.635739	0.1	0.16	0.2	0.13	0.06	0	0	0	0	0	0	0	0	0	0	15.545	9.64694	15.6343	12.6506	7.022	9.06968	8.23034	7.04144	8.71283	8.24602	8.88456	7.41766	7.49127	3.24736	3.87654
12454	Ccnk	0.061859	0	0	0	0	0	0	0	0.05	0	0	0	0	0	0	0	23.4572	28.6819	21.0335	18.0483	19.5916	11.6587	9.93133	10.4213	8.60866	7.22101	6.74669	6.87458	5.53697	6.75268	5.05723
56036	Ccnl2	0.199215	0	0.04	0.06	0	0	0	0	0	0	0	0	0	0	0	0	51.3182	33.7246	50.4624	46.6579	25.737	43.6829	43.019	52.4147	45.5803	26.8168	30.3264	32.5993	32.5846	18.3118	34.9004
12455	Ccnt1	0.617797	0.05	0	0.02	0	0.04	0	0	0	0	0	0	0	0	0	0	18.5008	6.77117	15.279	10.6157	7.20702	7.36002	5.10518	4.21747	4.70182	4.79729	4.54608	2.22909	3.43234	1.28844	2.54847
67974	Ccny	-0.240578	0.02	0	0	0.08	0.05	0.02	0.02	0.13	0.19	0.1	0.42	0.21	0.42	0.14	0.11	15.9051	12.6266	13.9255	12.0922	9.57802	9.56153	9.33519	11.7232	11.1926	14.8098	10.519	15.2401	9.51732	7.49097	7.99297
12460	Ccs	0.738159	0.31	0.19	0.31	0.14	0.41	0.53	2.47	2.04	1.78	3.52	4.07	2.45	2.4	1.58	1.29	30.5522	38.4408	32.2814	35.9792	49.9628	68.6113	98.5968	100.087	93.6491	102.803	135.876	155.33	166.786	229.557	127.847
12461	Cct2	0.464286	31.6	25.51	19.56	16.77	18.16	29.59	20.07	19.67	34.67	15.72	28.42	10.96	23.54	17.76	11.81	226.851	225.877	175.883	144.009	112.479	92.837	77.355	87.875	73.8651	57.4012	59.9104	49.6415	56.4873	49.353	43.7609
12462	Cct3	0.525	24	21.25	16.06	12.39	15.33	19.94	14.16	15.75	23.61	18.98	15.55	10.85	15.85	13.36	11.16	182.33	179.395	125.492	112.023	89.7806	70.7326	51.7683	63.2573	63.3987	38.5917	51.5093	31.1974	46.1828	54.7949	42.8262
12464	Cct4	0.321429	13.53	11.97	8.33	8.75	9.11	8.92	9.34	8.84	12.19	9.44	8.56	7.44	9.37	8.59	6.44	97.6012	71.6587	81.4048	66.1998	41.7775	41.6787	37.3377	37.6268	36.7126	27.6192	34.0392	33.1654	26.6623	16.879	18.2631
12465	Cct5	0.746429	19.33	18.64	13.85	12.74	10.98	11.68	12.15	14.56	18.71	11.31	11.67	8.86	11.84	9.44	8.1	187.411	177.205	147.147	137.333	110.14	93.6674	79.9379	75.744	79.1236	52.5437	53.2725	52.7146	63.6441	45.1248	40.5814
12466	Cct6a	0.267857	14.78	10.18	8.63	6.66	6.57	7.75	9.25	9.08	11.02	7.93	8.79	7.69	9.53	6.7	7.55	155.619	114.17	116.28	91.348	60.7811	58.2788	43.5743	49.4528	47.3148	45.3571	43.8964	32.2409	32.971	23.7624	26.3609
12468	Cct7	0.596429	18.54	15.61	11.98	11.23	11.72	12.66	14.94	11.3	17.75	12.75	13.48	10.79	11.9	8.25	9.86	189.456	199.042	154.281	122.218	105.884	81.8743	65.6311	64.7944	65.7993	51.9446	58.117	45.132	49.1462	44.0925	32.8018
12469	Cct8	0.446429	19.84	15.96	12.4	12.49	11.4	13.28	10.99	10.94	18.45	13.57	12.37	11.54	14.8	9.94	9.32	176.526	83.4066	134.165	125.432	55.8802	86.0072	62.1755	61.4459	55.8711	58.8296	56.4435	54.6443	44.2281	24.2947	38.2644
231874	Ccz1	-0.292436	0.01	0.05	0.04	0.02	0	0.04	0	0.06	0	0.27	0.05	0.37	0.3	0	0.48	26.7629	26.5179	27.1207	24.1205	16.1773	16.6671	14.0407	16.5759	16.3644	14.8669	13.641	13.8063	13.0715	12.5674	11.3039
12475	Cd14	0.124162	0	0	0	0	0	0	0	0	0	0	0.69	0	0	0	0	0	0	0	1.11828	1.30019	1.77375	1.73243	2.42268	2.73976	3.61816	2.09968	2.2364	2.02471	2.02264	2.44119
93671	Cd163	0.413619	0	0	0	0	0	0	0	0	0	0	0.16	0	0	0	0.05	0	0	0	0	0	0	0	1.26549	1.50074	1.77165	1.46087	1.4097	2.55388	2.25953	2.73043
68891	Cd177	0.536288	0	0	0.03	0	0	0.1	0.21	0.02	0	0	0	0	0	0	0	0	0	0	2.59257	11.1102	13.2941	16.1394	16.0611	8.69441	9.93296	5.60168	0	0	0	0
17079	Cd180	0.856765	0	0	0.01	0.01	0	0.01	0	0.01	0.04	0.04	0.04	0	0	0	0	0	0	0	1.00337	0	0	0	1.41845	1.86621	1.70192	1.64831	0	0	0	0
12479	Cd1d1	0.790247	0	0	0	0	0	0	0	0	0.15	0.05	0.27	0.11	0.33	0.89	0.63	3.25464	1.39745	2.3956	2.94105	2.61053	4.37533	11.0822	28.6086	22.222	32.5497	27.9331	82.3841	39.4541	65.372	63.039
12488	Cd2ap	0.546429	0.38	0.23	0.29	0.51	0.2	0.19	2.31	1.37	0.45	0.41	0.53	2.57	0.26	0.12	0.14	8.18303	2.40895	7.06676	8.14027	2.50846	5.9957	5.16191	5.80633	6.57688	6.56346	6.5531	6.85281	5.14388	1.55913	4.78984
70233	Cd2bp2	0.760391	0.69	0.4	0.17	0.23	0.27	0.2	0.1	0.11	0.36	0.13	0.51	0	0	0	0	23.7568	23.7427	19.2432	16.9264	13.9661	11.5869	11.4159	12.9636	11.6019	8.70134	9.03382	6.5473	7.17522	8.20589	8.16122
66205	Cd302	0.791779	0	0	0.06	0.05	0.09	0.07	0.23	0.45	1.02	0.77	1.76	1.12	0.81	0.29	0.4	12.9034	11.005	22.5718	30.0932	30.9599	47.599	61.9235	91.1079	89.0572	107.756	116.606	133.763	155.801	145.851	272.689
12490	Cd34	0.372486	0	0.06	0	0	0	0	0	0	0	0	0	0	0	0	0	13.7594	9.82096	6.49091	6.61835	6.04823	2.7644	3.01828	4.87459	3.6937	3.24777	1.53319	1.74016	0	0	0
12491	Cd36	0.393561	0	0.03	0.06	0.48	0.39	0.13	0.13	0.86	0.59	0.62	0.87	0.68	0.61	0.28	0.48	2.68591	1.57866	4.43974	7.46735	4.2929	8.43717	8.99569	14.5984	10.9129	8.3713	6.48906	4.22654	5.01338	1.00957	1.87506
12494	Cd38	0.421805	0.26	0.16	0.25	0.23	0.66	0.58	0	0.63	0.88	1.02	1.56	1	0.81	0.73	0.81	4.93643	4.35568	4.08573	4.75263	5.1711	5.93669	6.47523	9.35656	9.18665	9.10795	9.13753	7.6895	5.29503	2.91988	3.31531
70333	Cd3eap	0.591608	0.16	0.03	0	0	0	0	0	0	0	0	0	0	0	0	0	13.6486	13.2324	10.5278	6.94156	7.2056	5.47269	5.44863	7.19937	3.55844	3.5595	4.01058	3.13958	2.38128	3.47417	2.0525
12505	Cd44	0.714843	0.49	0.29	0.49	0.33	0.51	0.43	0.25	0.28	0.2	0.5	0.43	0	0	0	0	10.6576	10.9723	11.5976	10.0287	7.99845	8.10499	7.78536	8.76244	6.37336	9.39744	6.32335	4.10224	2.67756	0	1.36311
16423	Cd47	0.285714	0.91	0.93	1.61	1.03	1.12	1.29	0.89	1.14	2.08	1.19	2.07	1.43	0.46	0.69	0.34	43.5429	37.3279	49.133	52.7795	42.3279	45.4713	34.2875	32.505	28.8386	21.2349	20.0336	18.36	13.4689	7.84456	9.31792
12506	Cd48	0.433013	0	0	0	0	0	0	0.02	0	0	0	0	0	0	0	0	2.50019	1.24029	3.41209	3.41267	2.47078	2.89675	5.27297	4.6154	4.30998	3.08289	3.86141	2.14664	1.77694	0	1.26329
11801	Cd5l	0.294812	0	0.03	0.16	0.16	0.1	0	0.16	0.04	0	0.18	0.43	0	0	0	0	8.74104	19.0391	33.0997	54.4799	78.7031	68.7589	71.3379	76.4925	77.963	93.8936	62.45	68.0629	40.7651	54.465	34.3546
12514	Cd68	0.391269	0	0	0	0	0	0.54	0.33	0.54	1.3	0	1.49	0	0.37	0	0	8.1058	9.78991	10.3476	12.7625	19.6367	14.5304	20.4459	20.4088	19.4341	22.2587	20.082	12.4926	9.02341	14.403	9.03823
12520	Cd81	0.802179	0.18	0.27	0	0	0.18	0.18	0.36	0	0.24	0.52	0.79	1.11	2.55	1.17	1.02	68.9316	73.9333	57.2383	60.4249	51.7652	68.9763	81.6359	98.4073	118.64	150.265	155.935	129.137	138.761	189.002	140.852
12521	Cd82	0.0950682	0	0.24	0.37	0.51	0.23	0.31	0.3	0.18	0.24	0	0.19	0	0.36	0.58	0.41	46.7652	93.4373	76.1206	92.1894	93.2002	81.9004	45.4089	44.998	54.6784	37.9619	41.5492	32.5097	33.3673	38.8587	31.7235
12527	Cd9	0.898712	0	0	0.76	0.8	0.69	2.4	2.52	5.25	1.85	0	0	0	0	0	0	30.7569	32.1556	36.0311	42.5766	50.9466	82.3878	122.198	58.8058	52.3592	35.3268	34.182	33.6748	8.54515	12.6093	17.8511
17064	Cd93	0.265233	0	0.03	0.02	0	0.04	0	0.04	0.04	0	0	0	0	0	0	0	3.2952	2.67622	2.15462	2.53385	3.12813	3.00596	3.66929	3.77341	4.13595	3.82986	3.43201	1.89811	1.54812	0	0
171486	Cd99l2	0.371154	0	0.33	0	0	0	0	0	0	0	0	0	0	0	0	0	8.81598	8.72897	7.62996	6.46044	7.56353	5.99527	5.99393	3.97667	5.54254	6.32592	4.8191	6.76738	6.14978	6.6049	3.98328
72269	Cda	0.809852	0	0	0	0	0	0	0	0	0.31	0.89	0.91	1.47	1.54	0.35	0	2.35986	2.82604	3.01664	3.07656	3.32079	2.34785	4.30164	10.7685	11.0311	13.6676	13.5202	21.3525	10.7906	15.3347	9.71646
68968	Cdan1	0.786271	0.07	0.02	0.09	0.02	0	0.01	0	0	0	0	0	0	0	0	0	6.10255	5.56074	6.38059	6.23988	4.67902	3.36233	2.82001	3.56235	2.47925	1.82121	2.35732	1.57256	1.10403	0	0
98828	Cdc123	0.521978	0.34	0.38	0.46	0.14	0.12	0.06	0.04	0	0.45	0.34	0	0.11	0.16	0	0.05	45.7432	31.8056	40.4876	40.9427	24.7919	28.4064	23.9292	23.1018	25.2861	24.1941	25.3862	25.7378	17.1729	14.6797	17.2695
69957	Cdc16	0.72874	0.96	0.47	0.23	0.24	0.37	0.2	0.19	0.08	0.25	0.19	0.2	0.29	0.1	0	0	30.1853	23.1532	23.829	21.2577	15.3251	13.8005	13.3932	11.3918	13.0365	12.9443	12.7843	9.6452	9.7225	6.39614	7.03925
107995	Cdc20	0.695005	0.07	0.06	0.04	0	0	0	0	0	0	0	0	0	0	0	0	109.34	134.821	97.2472	87.2679	95.9473	50.2507	32.3171	30.3448	37.865	28.2245	30.7479	13.257	10.0483	0	0
52563	Cdc23	0.671957	0.33	0.5	0.42	0.08	0.07	0.12	0.42	0.29	0	0	0.28	0	0	0	0	21.3408	17.5868	18.8746	16.7329	11.6601	10.8416	7.48011	6.47588	7.431	7.64463	6.4653	4.22322	3.07309	2.1451	2.16967
66440	Cdc26	0.371154	0.7	0	0	0	0	0	0	0	0	0	0	0	0	0	0	46.4538	52.1434	10.7784	35.2644	30.4469	32.288	5.90627	22.7968	22.6958	5.82005	4.82303	24.2207	17.9255	17.6591	15.1675
217232	Cdc27	0.817733	0.11	0.08	0.08	0.04	0.07	0.13	0	0.03	0.01	0	0	0	0	0	0	11.2277	4.56264	10.2528	9.63603	3.86062	6.40154	3.75249	5.14713	4.33593	4.23726	4.15811	3.50765	2.27251	0	1.85143
216150	Cdc34	0.432799	0.52	0.59	0.19	0.21	0.18	0.16	0.13	0	0.11	0.33	0	0	0.27	0	0	130.342	185.33	128.366	100.067	112.746	76.1718	58.1329	67.8853	61.3793	47.8575	58.2771	29.0381	41.4058	79.5372	55.4419
12539	Cdc37	0.439286	4.3	2.73	2.94	1.6	1.99	1.46	1.71	1.82	2.22	1.81	1.97	2.3	1.96	2.24	1.53	95.674	118.942	81.8275	70.7568	68.6661	44.7825	48.8064	39.7458	45.8304	37.3337	38.0198	33.2479	42.1667	47.3837	33.9832
67072	Cdc37l1	0.371154	0	0	0	0	0	0	0	0	0	0	0	0	0	0	0.03	5.98252	3.39116	5.29069	5.51456	3.74449	4.22282	4.38249	4.99076	6.00991	5.36585	6.48086	4.64084	6.1491	4.42472	6.31945
71713	Cdc40	0.683415	1.61	5.89	5.07	5.53	0.11	5.46	2.4	0.09	0.12	0.17	0.02	0.02	0	0	0	9.9323	5.28472	8.81263	8.06887	5.06413	5.3619	5.3565	5.47477	4.97674	6.04364	4.36733	5.09736	5.20747	2.63724	3.95428
12540	Cdc42	-0.514286	7.37	7.03	8.42	6.49	7.62	9.94	9.6	13.62	22.14	19.77	24.04	19.65	16.23	9.25	12.72	127.151	108.476	113.129	90.0313	89.676	92.4602	73.3779	69.4829	84.5947	83.1367	78.4338	57.793	59.8293	46.951	44.5108
217866	Cdc42bpb	0.0626119	0.03	0.04	0.05	0.13	0.07	0.11	0.1	0.22	0.32	0.43	0.28	0.39	0.29	0.29	0.32	10.8623	10.5488	7.48005	7.73582	10.1977	7.61752	9.14674	9.96815	9.85405	11.9266	9.11893	11.1658	8.02978	8.53709	7.10049
240505	Cdc42bpg	0.309295	0	0	0	0	0	0	0	0	0.03	0	0	0	0	0	0	3.38821	3.04436	3.34029	3.88533	4.23897	5.1406	5.74005	5.60942	5.28932	4.80736	4.02573	4.52604	3.358	1.8658	1.68084
104445	Cdc42ep1	0.0653003	0	0.02	0.02	0	0	0.02	0	0	0.06	0.02	0.07	0.07	0.06	0	0.04	8.69134	11.4507	7.74451	7.46401	9.18035	7.00996	7.42442	12.3237	10.9162	11.0977	12.9578	7.4513	8.66726	9.0379	7.60224
56699	Cdc42ep4	0.333845	0.1	0.02	0.03	0.04	0	0.02	0.04	0	0	0	0.07	0	0	0	0	14.7032	22.3235	16.1955	14.2342	16.8813	15.1801	12.5153	11.0728	9.49957	9.46868	11.6366	10.8987	16.6928	11.8448	10.6321
12544	Cdc45	0.822495	0.19	0.11	0.09	0.09	0.02	0	0	0	0	0	0	0	0	0	0	25.8668	25.4604	27.9648	22.0654	17.0969	10.8503	8.49027	6.5404	9.25821	5.23067	4.5468	1.68353	2.84853	0	0
71702	Cdc5l	0.364611	0.92	0.57	0.53	0.53	0.46	0.42	0.33	0.43	0.78	0.54	0.96	0.6	0.22	0.11	0.09	22.3425	17.0096	22.3541	19.715	12.5386	13.8877	10.6301	9.92127	9.86024	8.58598	8.04352	6.18526	5.06946	2.52969	3.51988
23834	Cdc6	0.596962	0	0.15	0.03	0	0	0	0	0	0	0	0	0	0	0	0	26.2641	32.9457	30.5484	22.2548	16.8744	12.2808	7.95495	5.77881	8.79569	3.73751	3.64759	0	0	0	0
214498	Cdc73	0.716339	0.41	0.66	0.34	0.24	0.24	0.38	0.18	0.18	0.5	0.13	0.17	0.16	0.2	0.05	0.07	3.78275	2.22438	3.5051	3.2579	2.25935	2.33921	1.86717	1.80381	1.73087	1.69126	1.28898	1.33081	0	0	0
108912	Cdca2	0.76496	0.11	0.07	0.07	0.02	0	0	0	0	0	0	0	0	0	0	0	11.6611	10.0093	12.3271	10.0271	7.98775	6.94276	4.49794	3.96848	5.26907	3.5024	4.05142	1.35589	2.20974	0	0
14793	Cdca3	0.371154	0	0.06	0	0	0	0	0	0	0	0	0	0	0	0	0	80.5603	92.5766	95.0877	91.3538	78.367	54.6462	32.5143	35.6763	35.4179	19.7539	25.8177	9.73399	7.42384	1.44837	1.10189
67849	Cdca5	0.4334	0	0.04	0	0	0	0	0	0	0	0	0	0	0	0	0	26.8711	32.926	29.1225	24.7314	21.6059	16.9594	10.2021	7.69832	10.1359	4.8842	5.30814	2.13676	2.28077	0	0
66953	Cdca7	0.4334	0	0.02	0	0	0	0	0	0	0	0	0	0	0	0	0	39.5582	39.6506	30.9613	29.4465	23.3043	17.6539	13.8971	11.8051	10.9888	7.54445	5.5748	2.09471	1.20522	0	0
52276	Cdca8	0.822674	1.16	0.66	0.32	0.4	0.47	0	0.03	0	0	0	0	0	0	0	0	81.7505	57.8488	90.164	53.2078	43.7376	41.3666	24.266	18.1938	16.9235	6.95672	7.92329	4.57736	2.89726	0	0
12550	Cdh1	0.607929	0	0	0.09	0.06	0.05	0.15	0.18	0.23	0.3	0.29	0.3	0.72	0.13	0	0.3	7.25602	11.0632	13.0473	15.7642	15.9195	16.09	22.0805	19.7515	29.9505	29.7281	21.1282	19.6317	12.3458	12.8753	8.22304
12558	Cdh2	0.62433	0.02	0.05	0.04	0.02	0.06	0.07	0.05	0.1	0.26	0.22	0.47	0.55	0.78	0.37	0.49	11.5594	5.96158	7.78967	7.82371	5.71922	8.26243	7.27754	8.69241	10.0106	15.4301	12.7654	15.1698	15.736	7.48181	11.8882
12562	Cdh5	0.530233	0.02	0.06	0.03	0.05	0.03	0	0.09	0.12	0.07	0.1	0.22	0.08	0.03	0	0.03	14.7987	14.3147	9.30346	10.963	14.0679	10.2332	13.9336	12.7197	16.672	20.0419	15.6465	9.92156	7.42456	7.28817	3.14944
268663	Cdhr2	0.124838	0	0	0.06	0	0	0	0	0	0	0	0	0	0	0	0	5.55077	8.02026	7.40915	12.0264	19.2007	12.1305	7.8432	4.29299	6.80109	4.24918	2.83993	0	0	0	0
52858	Cdipt	-0.235714	0.15	0.23	0.24	0.17	0.19	0.14	0.34	0.4	0.42	0.47	0.51	0.83	1.12	1.65	1	39.6626	48.0576	33.8782	32.0461	36.8653	24.7568	25.494	27.8524	25.6992	23.8359	23.9511	19.0695	27.8893	40.9426	26.7926
12534	Cdk1	0.966668	5.82	4.34	3.76	2.69	3.03	1.9	1.39	0.95	1.03	0.92	0.38	0	0	0	0	51.9594	44.0162	51.9571	50.0294	35.6854	31.5025	18.6135	18.0022	22.145	13.3695	16.0629	7.44698	4.66655	0	0
12537	Cdk11b	0.739483	0.47	0.45	0.26	0.19	0.18	0.19	0.1	0.11	0.21	0.14	0.1	0.08	0.05	0.14	0.03	39.3976	30.3272	34.0724	29.3475	20.0129	25.9084	22.4171	21.506	18.5973	15.3085	18.4201	15.79	15.8987	12.4062	14.304
69131	Cdk12	0.496165	0.01	0.01	0	0.02	0	0	0	0	0	0	0	0	0	0	0	9.01712	7.06267	9.45143	7.91301	6.21133	8.17955	5.94578	4.44741	2.82015	3.92367	3.69406	3.71776	1.86123	0	2.69745
69562	Cdk13	0.780173	0.01	0.02	0.05	0.02	0	0.01	0	0	0	0	0	0	0	0	0	7.50863	5.95402	7.37672	6.99748	5.77515	5.25546	4.57219	4.35413	4.5197	4.30921	3.50994	3.11169	2.50536	1.73884	2.41102
237459	Cdk17	0.185577	0	0.01	0	0	0	0	0	0	0	0	0	0	0	0	0	11.5501	6.58314	10.9355	10.2473	5.49509	7.70781	6.36789	6.40508	5.53211	5.40945	5.43372	5.93024	4.3648	1.6884	3.91974
12566	Cdk2	0.920152	0.7	0.44	0.41	0.37	0.4	0.35	0.39	0.14	0.23	0.21	0	0	0	0	0	36.2715	31.3914	33.9847	31.4179	26.3483	24.7971	17.679	17.3696	15.1541	11.0322	11.1559	8.10091	7.03216	3.17591	2.72953
12567	Cdk4	0.869263	0.65	0.44	0.18	0.06	0.06	0.08	0	0	0	0	0	0	0	0	0	222.309	235.193	173.793	145.793	123.029	94.182	78.3703	90.4899	75.6275	61.0482	75.8144	53.0184	42.255	47.1698	40.5141
12568	Cdk5	0.378738	0.02	0.04	0	0.08	0.3	0	0	0.17	0.23	0	0.24	0.13	0.52	0.23	0.54	7.59481	7.83593	6.79265	6.79884	5.03368	7.73497	7.39615	7.7707	6.63155	7.09385	8.27181	7.49319	9.16013	10.1031	9.39083
214444	Cdk5rap2	0.590871	0.02	0.01	0	0	0	0	0	0	0	0	0	0	0	0	0	5.20354	11.9168	4.99092	3.92231	2.85162	3.44939	1.47574	1.96894	2.93452	2.18686	2.50792	0	0	0	0
80280	Cdk5rap3	0.275492	0.07	0.13	0.13	0.15	0.17	0.23	0.41	0.38	0.88	0.46	0.78	0.54	0.47	0.38	0.5	23.9251	25.1012	20.482	22.9794	23.1692	19.1318	19.2467	21.9716	24.1529	24.0065	22.0168	24.0825	28.2563	42.6584	33.333
12571	Cdk6	0.509875	0.33	0.3	0.23	0.21	0.21	0.2	0.3	0.12	0.37	0.41	0.47	0.62	0.18	0.19	0.16	5.89794	2.4814	2.04995	4.62124	4.11088	1.12599	1.37716	0	4.29874	4.22105	1.55978	2.76462	2.89625	0	0
12572	Cdk7	0.43399	0.19	0	0.12	0	0	0	0	0	0	0	0.1	0	0	0	0	5.37672	3.1109	4.25326	3.51107	2.5945	2.37196	2.49381	2.23679	2.22695	2.44795	2.09848	1.98049	1.59555	0	1.58181
264064	Cdk8	0.453921	0	0.02	0.02	0	0	0	0	0	0	0	0	0	0	0	0	36.0649	21.2691	34.727	32.1155	19.0226	20.5619	14.4679	13.518	14.6562	13.4368	10.2172	9.86595	6.72996	4.0115	6.33462
107951	Cdk9	0.593387	0.19	0.26	0.21	0.11	0.13	0.16	0	0.08	0.2	0.09	0.1	0.08	0.06	0.03	0.05	55.2003	62.7604	43.4213	45.5853	42.6319	34.9433	39.4523	59.3722	34.2864	26.9173	29.994	30.8944	25.1598	25.723	22.6699
68916	Cdkal1	0.29505	0.01	0.01	0.02	0	0	0	0	0	0.01	0	0	0	0.01	0	0	3.14987	1.28281	2.19918	2.05161	0	1.77786	2.08567	1.89133	1.58457	1.44827	1.60124	1.58359	2.08163	1.03273	2.45819
12577	Cdkn1c	0.862789	1.28	0.68	0.67	0.7	0.6	1.88	0.66	0.11	0.31	0.31	0.4	0.48	0	0	0	240.086	267.11	144.51	166.311	331.906	291.852	128.846	27.5552	88.4794	99.5824	152.037	40.0502	13.446	1.49863	1.73076
70925	Cdkn2aip	-0.266309	0.1	0.22	0.11	0.12	0.21	0.25	0.34	0.15	0.47	0.44	0.66	0.79	0.43	0.12	0.52	5.46635	3.34548	4.88093	5.17467	3.44663	3.26991	3.26293	3.54969	3.43855	3.8978	3.62308	4.24615	3.00309	1.09163	2.08376
52626	Cdkn2aipnl	0.371154	0	0	0.13	0	0	0	0	0	0	0	0	0	0	0	0	30.7349	41.4012	30.7999	26.5992	21.91	17.8181	14.5648	14.3791	13.2781	11.6877	11.5474	10.2225	8.84328	6.71907	5.05412
12580	Cdkn2c	-0.433013	0	0	0	0	0	0	0	0	0	0	0	0	0	0	0.15	15.2935	21.9071	22.3085	21.744	22.2931	15.6372	11.2029	10.9688	14.4104	9.02348	9.12378	4.72067	6.95275	3.99233	2.94145
12581	Cdkn2d	0.410503	0	0.16	3.05	0	0	0	0	0	0	0	0	0	0	0	0	62.8291	76.8964	81.0622	89.4222	98.5026	73.8701	44.5563	38.2224	39.9763	17.1789	15.5903	4.69533	5.8063	2.43702	1.98263
12583	Cdo1	0.751693	0	0	0	0	0	0	0	0	0	0	0.13	0	1.76	0.56	0.68	16.4479	20.5458	21.3187	28.4961	33.8178	41.5101	98.3583	175.861	184.321	205.415	264.35	331.181	1084.36	540.058	618.199
12585	Cdr2	0.434568	0	0	0	0.01	0	0	0	0	0	0	0	0	0	0	0	71.0289	77.1017	104.814	110.198	105.306	97.6936	64.7705	31.1183	30.9058	12.8067	9.86568	1.62622	0	0	0
110911	Cds2	0.336814	0	0	0	0	0	0	0	0	0.08	0	0.13	0.29	0.09	0.07	0.13	6.45282	6.83734	6.06088	5.2261	6.18775	4.84858	4.81666	6.90601	6.72589	6.91452	5.70282	8.54913	8.54723	8.28665	5.89974
321022	Cdv3	0.296929	1.65	0	0	0.69	0.74	0.79	1.88	1.27	2.23	3.25	0	0	0.21	0	0	59.2402	36.4615	44.3103	41.5175	21.1511	30.5688	23.7616	27.3725	23.0425	21.5481	21.3762	17.0262	16.4573	9.12134	14.4448
12593	Cdyl	0.628819	0.11	0.07	0.07	0	0.03	0	0	0	0	0	0	0	0	0	0	9.72635	9.78391	9.90811	10.4452	8.70658	6.09975	4.37044	3.74726	4.59077	2.17749	1.90903	1.10415	0	0	0
26365	Ceacam1	0.956918	0	0	0.04	0	0.02	0.05	0.1	0.11	0.18	0.16	0.32	0.39	0.67	0.4	0.67	0	0	1.68756	3.82733	7.76519	11.5296	13.8139	11.1733	14.8388	16.6761	17.5454	18.5959	27.6506	37.092	33.2491
110794	Cebpe	0.458798	0	0	0	0	0	0.09	0.04	0	0	0	0	0	0	0	0	1.62825	3.27976	4.35731	6.20131	15.8646	15.1283	14.007	15.0866	6.2892	6.6064	3.81984	0	1.60611	4.79843	4.0488
12607	Cebpz	0.670444	0.13	0.18	0.1	0.07	0.06	0.03	0.02	0.03	0.07	0.01	0	0	0	0	0	18.188	8.96879	13.6576	13.0861	5.32768	8.61001	7.31923	9.63924	5.99348	4.99568	4.81935	6.10017	6.22709	3.92503	7.21016
13706	Cela2a	-0.132652	0	0	0	0	0	1.34	0	0	0	0	0	0	0	0	0	0	0	0	0	0	0	0	0	0	0	0	1.09263	1.58882	1.18871	0
13046	Celf1	0.335714	1.42	1	0.84	0.85	0.78	0.77	0.64	0.56	0.96	0.79	0.88	0.86	1.03	0.34	0.71	33.2803	26.5166	32.2626	29.342	16.9046	21.2579	13.4087	17.1403	14.5985	7.79637	10.8762	11.7433	10.2783	6.74416	9.22845
14007	Celf2	-0.109871	0	0.14	0.17	0.1	0.09	0.17	0.36	0.43	1.3	0.86	2.61	0	0	0	0.34	2.14098	0	0	2.08469	1.52169	1.80754	1.5956	0	1.55872	0	0	0	0	0	0
83921	Cemip2	0.55722	0.02	0.02	0.03	0.01	0.02	0.06	0.02	0.02	0.06	0	0.02	0.01	0.02	0	0	5.54263	3.70346	3.59702	3.49201	3.33414	4.0499	4.06128	3.41231	4.30215	3.86444	2.9829	2.83012	2.26894	0	0
12617	Cenpc1	0.371486	0	0	0.02	0	0	0	0	0	0	0	0	0	0	0	0	7.88572	3.39367	7.66237	7.28217	3.80864	4.57779	3.51326	2.69248	3.54426	3.53796	2.67527	1.98993	1.28584	0	0
229841	Cenpe	0.45295	0.07	0.05	0.02	0	0.01	0.01	0	0	0	0	0	0	0	0	0	11.7109	2.71225	12.8935	12.5699	2.06497	6.14659	3.95379	3.42284	3.68308	2.19652	2.50284	1.16046	0	0	0
108000	Cenpf	0.387144	0.02	0.02	0.02	0	0	0	0	0	0	0	0	0	0	0	0	8.99292	2.66661	10.2691	10.6477	2.83904	6.18484	3.95611	3.81878	4.12197	2.44331	2.38106	1.3904	0	0	0
26886	Cenph	0.747777	0.29	0.3	0.17	0.04	0	0	0	0	0	0	0	0	0	0	0	29.4642	19.0828	34.3472	27.6906	11.592	14.8668	10.288	8.13254	7.68391	4.72987	4.96904	2.38437	2.35579	0	0
60411	Cenpk	0.578122	1.95	1.55	0	0.1	0.08	0	0	0	0	0	0	0	0	0	0	8.66597	3.57212	8.94163	7.59752	3.12472	4.26594	2.57092	2.28616	2.62938	1.36485	1.76722	0	0	0	0
52504	Cenpo	0.248324	0	0.01	0	0	0	0	0	0	0	0	0	0	0	0	0	4.51534	2.55554	4.65043	3.37895	2.40244	2.5446	1.67777	1.98372	1.27983	1.49542	1.20399	1.052	0	0	0
73139	Cenpv	-0.101877	0.57	1.33	0.53	0.03	0.07	0.59	0.12	1.22	0.32	0.84	1.68	1.31	1.69	1.27	1.69	18.6566	25.9623	21.4384	16.3277	11.5756	10.9101	8.99021	11.6571	8.68717	8.158	9.28528	13.2989	11.6656	10.2264	7.03202
12009	Cep131	0.597374	0.02	0.01	0	0.14	0	0	0	0	0	0	0	0	0	0	0	5.68553	4.66055	3.74577	3.4843	3.3296	3.06284	2.72633	3.59218	2.5345	1.95338	2.54041	3.03836	2.33569	1.418	1.1788
381644	Cep135	0.334932	0.01	0.01	0	0	0	0	0	0	0	0	0	0	0	0	0	3.22441	1.11907	3.17917	3.24723	1.24909	1.85649	0	1.05058	1.47275	0	0	0	0	0	0
545389	Cep170	0.350334	0.02	0.03	0.01	0	0	0	0	0	0	0	0	0	0	0	0	2.63758	1.28405	2.36184	2.52776	1.34763	2.0028	1.52866	1.38716	1.40227	1.33149	1.06899	0	0	0	0
16328	Cep250	0.82176	0.14	0.05	0.04	0.04	0.02	0	0	0	0	0	0	0	0	0	0	12.3174	10.9262	12.7418	9.81681	5.78752	3.92035	4.08398	4.52865	4.17037	3.47552	2.67869	2.86856	2.27888	0	1.25329
83922	Cep41	0.792324	0.13	0.04	0.05	0.04	0	0	0	0	0	0	0	0	0	0	0	3.1187	2.1258	2.47812	2.15897	1.20847	1.0274	1.27836	1.05258	1.68087	1.82774	0	0	0	0	0
225659	Cep76	0.719373	0.12	0.14	0.12	0.11	0.14	0	0.3	0	0	0	0	0	0	0	0	24.9117	23.4562	29.8322	27.8627	22.7757	17.3772	10.1095	6.09474	8.39852	3.34076	3.02931	0	0	1.03635	0
70012	Cep85	-0.591608	0.04	0	0.01	0	0	0	0	0	0	0	0	0	0	0	0	8.0727	18.063	17.5742	19.4748	32.2685	54.2497	45.8396	89.9957	75.6808	28.5428	38.4998	36.5017	120.885	50.0859	208.145
99712	Cept1	0.741629	0	0	0	0	0	0	0	0.25	0.8	1.81	1.12	1.48	1.09	0.67	1.05	6.05199	3.46722	4.71625	6.1792	7.35985	6.5373	7.69945	12.5682	14.4236	10.9125	17.3802	19.2437	17.4664	4.44087	12.6643
99151	Cercam	0.590871	0.23	0.05	0	0	0	0	0	0	0	0	0	0	0	0	0	28.0897	31.8319	25.8834	19.353	24.0946	10.6699	6.50378	4.46343	5.51124	1.78687	1.63905	0	0	0	0
76893	Cers2	0.871429	0.21	0.26	0.48	0.35	0.38	0.62	0.11	0.45	0.7	1.2	1.64	1.79	3.93	2.84	3.33	40.5376	54.3568	52.2136	44.1947	46.6897	41.6557	41.0168	48.1778	64.9757	73.0989	81.0693	58.5536	89.9688	141.781	90.9951
241447	Cers6	0.0638877	0	0	0	0	0	0	0	0	0	0	0.04	0	0	0	0	1.4268	0	1.16905	0	0	0	2.01708	1.614	2.46865	1.99078	1.46586	2.07401	0	0	2.08296
382044	Ces1b	0.52057	0	0	0	0	0	0	0	0	1.68	0	0	0	0	5.99	11.39	0	0	0	0	0	0	0	0	2.16487	6.49896	10.9192	6.46966	53.9985	20.2257	17.0022
13884	Ces1c	0.953492	0	0	0	0	0	0	0.68	0.63	3.08	7.22	10.46	15.76	19.55	19.13	16.82	6.99922	2.5504	3.56167	7.69698	13.3729	26.9755	56.0738	213.603	333.194	610.257	626.559	985.985	1755.73	833.245	685.787
104158	Ces1d	0.884719	0	0	0.35	0.67	0.79	2.08	5.2	4.77	15.47	29.75	39.52	64.7	85.57	69.37	71.65	2.51063	1.82555	5.96694	17.1594	28.6259	36.1834	51.6892	105.393	75.4506	157.79	146.109	240.949	186.105	210.717	63.4124
13897	Ces1e	0.928058	0	0	0	0.02	0.01	0.05	0.15	0.09	0.45	0.38	0.51	1.46	2.78	6.67	5.18	0	0	0	2.94584	6.46979	5.69478	3.53309	4.53729	7.26451	12.2484	14.7482	10.6243	19.921	55.5229	16.0636
234564	Ces1f	0.901726	0	0	0	0	0	0	0	0	0	0.24	0	0.69	3.09	22.5	32.51	0	0	0	0	0	0	0	0	1.54089	2.95536	1.36452	2.94851	5.21786	133.377	60.1088
12623	Ces1g	0.924866	0	0	0.02	0.08	0.1	0.32	0.58	0.43	1.97	4.03	6.9	13.83	32.22	27.42	21.78	0	0	1.37004	3.42629	6.11358	3.15407	2.12088	6.53734	8.37227	25.7876	38.8705	10.4088	127.964	54.5257	15.3438
102022	Ces2a	0.845398	0	0	0.51	0.63	0.57	1.98	5.46	3.75	11.89	17.96	21.91	19.39	32.9	18.87	28.12	2.1442	3.44719	5.94343	12.5692	20.3447	25.6676	45.8268	83.2698	54.5497	70.3297	56.3338	58.5073	79.8338	192.424	85.1768
234671	Ces2c	0.683953	0	0	0	0	0	0	0.17	0	0.53	1.52	2.71	3.46	2.06	2.85	12.68	0	0	0	0	0	0	0	1.36991	1.71227	1.57672	1.31125	1.36638	0	26.0167	21.5866
234673	Ces2e	0.931655	0	0	0.03	0	0.04	0.26	0.65	0.39	1.41	11.57	15.54	23.74	14.51	7.25	13.44	0	0	0	1.61203	2.2006	1.77551	5.23067	9.97684	28.2062	61.562	62.2838	111.965	38.4552	72.3752	30.0933
72361	Ces2g	0.0357143	0	0.01	0.05	0.11	0.1	0.17	0.16	0.09	0.37	1.03	1.55	4.48	4.14	2.35	4.6	7.5926	9.69619	15.0668	17.7756	14.9222	14.0196	11.133	11.5337	16.6335	10.3458	9.94498	7.64044	15.5242	19.2155	7.85766
382053	Ces3a	0.838051	0	0	0	0	0	0	0.66	1.29	2.27	8.48	4.22	8.31	27.74	106.34	170.22	1.172	0	0	1.00711	1.4478	2.34639	27.5045	37.7993	100.717	72.6851	45.9711	2.3042	29.2486	1396.24	823.405
13909	Ces3b	0.992701	0	0	0	0	0	0	0	0	0	0	0	0	14.82	70.65	102.59	0	0	0	0	0	0	0	0	0	0	0	0	1.98757	300.747	133.465
26370	Cetn2	0.627908	0.27	0.24	0.22	0.12	0.07	0.08	0.09	0.1	0.12	0.13	0	0.09	0.19	0.04	0.06	19.3378	10.0493	17.6125	13.016	8.18077	11.8473	12.9306	8.77485	8.92306	7.19402	8.63528	5.7675	12.9728	6.18521	8.03947
12626	Cetn3	0.514544	0.11	0.27	0.08	0.09	0	0	0.13	0	0	0	0	0	0	0	0	60.1101	31.3756	53.493	49.5148	20.9759	33.4572	20.1633	20.9971	22.4244	19.5267	23.2413	18.3092	20.6237	6.55726	10.5348
216618	Cfap36	-0.247436	0	0.01	0	0	0	0	0	0	0	0	0	0	0	0	0	7.56345	3.83631	6.33285	6.28525	3.23845	5.04724	4.05018	4.56253	4.47709	5.02313	4.40291	4.32378	6.56561	2.68956	3.61187
14962	Cfb	0.92404	0.02	0.04	0.12	0.08	0.08	0.28	0.51	0.22	0.32	1.13	1.4	2.56	3.43	4.43	4.15	41.9936	43.9889	71.3212	106.71	154.296	198.993	301.112	324.72	397.134	522.555	431.345	547.193	350.655	588.657	605.763
23837	Cfdp1	0.673816	1.06	0.78	0.57	0.48	0.31	0.35	0.19	0.14	0.21	0.25	0.39	0.17	0.3	0.13	0.21	87.7631	40.2854	70.1243	57.7699	29.07	42.5805	32.0695	31.3596	30.4596	29.0365	30.9356	30.4431	25.5123	13.1563	25.0786
12628	Cfh	0.93136	0	0	0	0	0	0	0.25	0.19	0.12	0.62	0.56	0.74	0.67	0.34	0.7	1.41404	0	2.39394	4.5106	2.54575	11.0328	30.0751	30.0849	42.0439	74.3834	47.7746	78.9615	56.6407	40.0209	63.0264
12630	Cfi	0.602697	0	0	0.14	0.11	0.14	0.16	0.15	0.05	0.09	0.21	0.26	0.21	0.16	0.05	0.07	40.4546	27.0772	70.2785	105.911	90.2936	159.987	184.043	201.549	243.909	339.047	296.757	365.596	246.081	244.436	260.804
12631	Cfl1	0.182143	120.54	106.11	88.17	104.61	77.47	92.43	84.29	117.09	190.22	146.38	159.57	110.06	74.21	40.43	61.94	764.047	868.975	673.854	603.909	563.634	432.89	335.239	339.361	333.476	260.516	272.598	171.428	202.348	223.617	177.799
12632	Cfl2	0.892857	10.39	6.83	7.8	5.6	3.94	7.83	9.66	9.62	13.51	10.92	15.49	19.27	15.14	10	8.49	10.2765	6.39324	7.85136	8.63276	7.38791	9.71244	8.16516	10.052	11.7152	12.9098	13.6825	13.5057	13.4107	9.31621	8.56444
18636	Cfp	0.553975	0	0	0	0	0	0	0	0.06	0	0.1	0.11	0	0	0	0	9.93598	13.4961	15.1047	24.3646	35.9844	38.8892	48.3464	48.5803	43.1639	47.3586	40.3703	27.754	26.3069	25.2686	16.3053
106143	Cggbp1	0.857589	0.54	0.37	0.16	0.27	0.6	0.26	0.11	0	0.13	0	0	0	0.09	0	0	14.2865	12.342	13.6296	14.3565	10.8425	11.3793	10.0613	9.81059	9.90457	9.24925	7.9905	7.48049	8.46841	5.03199	6.41433
70737	Cgn	0.432143	0.14	0.15	0.26	0.45	0.4	0.42	0.64	0.72	0.88	0.86	1.46	1.26	0.73	0.85	0.9	5.15216	4.96703	5.91101	7.77387	8.79958	8.6812	9.21335	8.031	10.4936	11.1762	10.1679	8.0415	4.95301	6.99702	5.58922
68178	Cgnl1	0.756276	0	0	0	0	0	0	0	0	0	0	0	0.1	0.11	0.04	0.09	2.56329	1.9853	2.22614	1.9552	2.24808	2.45494	2.16372	1.99785	4.06624	6.03515	5.93358	6.48865	7.26865	6.59384	8.63952
68044	Chac2	-0.0644008	0.04	0.06	0.11	0.07	0.13	0.1	0.05	0.07	0.28	0.08	0.15	0.27	0.21	0	0.13	21.1208	20.9417	30.8752	32.4424	32.3465	36.4724	24.3746	9.99529	15.6664	11.4537	13.2213	9.99771	12.9501	8.43391	9.28586
27221	Chaf1a	0.941996	0.28	0.21	0.09	0.13	0.08	0.04	0.03	0	0.01	0	0	0	0	0	0	40.1874	50.1585	39.5228	33.0513	30.0838	19.8149	12.862	9.32035	12.609	8.02474	6.66715	1.61244	3.31339	0	0
110749	Chaf1b	0.961728	0.43	0.31	0.22	0.19	0.15	0.09	0.01	0.03	0.02	0	0	0	0	0	0	26.0622	32.3142	23.6815	17.117	15.1575	10.4105	7.90039	8.86487	10.0873	5.24023	5.59222	3.74431	4.59581	0	0
101994	Champ1	0.903932	0.17	0.2	0.05	0.03	0.04	0.03	0.02	0.02	0.02	0	0.03	0.01	0	0	0	12.3736	11.7219	9.69013	8.7264	6.13342	5.22319	3.3761	4.82747	4.13597	3.18475	2.96881	2.21723	2.15262	1.77418	1.3323
66121	Chchd1	0.591608	0.21	0.08	0	0	0	0	0	0	0	0	0	0	0	0	0	61.7714	53.1321	51.565	47.3211	31.1127	36.8914	33.6068	33.5609	28.8968	25.1189	30.7124	26.1935	42.6365	27.2718	24.4469
66075	Chchd3	-0.467857	1.93	1.73	1.26	1.64	2.24	3.14	4.43	3.99	4.76	4.98	8.31	8.5	8.71	15.71	5.74	46.4646	51.957	44.9989	46.5988	31.6912	31.6209	26.1957	30.6128	34.5789	29.7136	36.839	37.0002	43.7021	21.2262	35.6139
72170	Chchd4	-0.286393	0.3	0.31	0	0	0	0	0	0	0.47	0	0	0.58	0.58	0.78	0	30.3507	25.5169	21.226	16.912	12.8376	11.0074	10.7449	13.4932	9.43138	7.56978	7.76616	6.0501	6.77405	6.44407	4.71055
66170	Chchd5	0.557503	0	0.21	0	0	0.08	0	0.17	0.34	0	0.27	0.32	0.36	0.37	0.27	0	6.42144	8.48532	7.26437	4.67579	6.43833	6.13824	6.93763	9.40552	6.21673	5.42676	6.3371	8.7753	7.57625	9.08874	6.90446
66098	Chchd6	0.320443	0.24	0.15	0.04	0.1	0.11	0	0.27	0.06	0.08	0.13	0.15	0	0.15	0	0.04	10.1699	13.5955	7.8871	6.12973	6.41754	4.87513	3.83027	3.954	3.70564	3.72691	4.24998	4.24135	4.68592	3.47438	2.05979
66433	Chchd7	0.107221	0	0.86	0	0	0	0	0	0	0.36	0	0	0	0.11	0	0	18.3753	29.4092	20.2774	15.2334	15.4762	18.4946	16.8137	15.5836	14.0302	17.2142	16.2648	15.6269	16.4811	16.3556	11.4917
12648	Chd1	0.482075	0.04	0.07	0.01	0.04	0.01	0.01	0	0	0.01	0	0	0	0	0	0	8.68701	3.46382	8.58031	8.24845	3.17216	4.14056	4.47924	3.73875	3.61016	3.65354	3.50913	1.73596	2.80351	0	1.56361
68058	Chd1l	0.720787	0.04	0.03	0.02	0.05	0	0.01	0	0	0	0	0	0	0	0	0	11.9355	11.4483	9.61133	8.88519	5.76365	4.34837	3.95575	5.82114	3.88966	4.2567	4.62716	3.02742	4.42409	3.08631	3.11035
244059	Chd2	0.609938	0.01	0	0	0.02	0.01	0.01	0.02	0.02	0	0	0	0	0	0	0	6.88068	3.87683	6.81495	6.16194	4.71086	6.32861	6.61602	5.18051	4.9543	4.50547	3.42016	5.04177	3.50462	1.50129	1.90776
107932	Chd4	0.909741	0.81	0.54	0.45	0.35	0.37	0.26	0.23	0.23	0.34	0.29	0.25	0.2	0.14	0.04	0.08	57.3285	58.2028	49.7604	42.0379	39.8293	28.4809	24.12	29.7748	26.8046	23.5912	22.2468	15.9465	12.9313	14.8964	12.593
320790	Chd7	0.686403	0.1	0.02	0.06	0.05	0	0	0	0	0	0	0	0	0	0	0	3.42879	6.03075	6.6204	6.64928	3.86537	1.73374	3.60164	0	1.31212	0	0	1.37617	0	0	0
67772	Chd8	0.813125	0.02	0.02	0.01	0.01	0.01	0	0	0	0	0	0	0	0	0	0	11.834	9.57621	10.4491	10.2838	8.20054	6.99639	5.26269	7.85321	6.94251	6.37447	4.19857	4.22412	3.17914	2.60251	4.03362
218865	Chdh	0.910555	0	0	0.19	0.37	0.6	1.68	3.67	3.24	6.16	12.01	11.77	19.09	10.03	10.53	7.19	0	0	2.76286	4.9053	11.2336	14.926	13.1836	8.82817	19.6216	28.7289	30.6615	30.1404	19.2558	14.9137	14.8914
12649	Chek1	0.828934	0.34	0.32	0.13	0.18	0.1	0.02	0	0	0	0	0	0	0	0	0	9.14897	3.02939	7.85311	6.50148	2.136	3.37351	1.97065	1.86836	2.40648	1.77098	1.50759	0	1.00803	0	0
50883	Chek2	0.777392	0.05	0.03	0.06	0.01	0	0	0	0	0	0	0	0	0	0	0	16.4808	14.9791	17.8823	15.1933	11.3179	9.65444	6.3303	4.86152	5.63184	3.37986	3.4501	1.39545	0	0	0
27967	Cherp	0.772118	0.75	0.48	0.41	0.5	0.37	0.32	0.59	0.41	0.34	0.4	0.33	0.2	0.31	0.07	0.17	39.1525	41.8125	32.7075	27.22	25.5679	17.2915	14.261	15.4813	15.0619	12.8124	12.755	10.0253	8.45603	8.99729	8.87579
68038	Chid1	-0.0358425	0.04	0.07	0.08	0.1	0	0	0.06	0	0.05	0.14	0.29	0.23	0.38	0.11	0.57	8.8372	8.969	6.81535	5.92705	6.29773	5.56857	4.46305	2.24648	7.3154	5.34568	5.13272	2.39768	4.95103	13.5459	8.64025
12654	Chil1	0.417101	0	0	0.01	0	0	0.07	0.09	0	0	0	0	0	0	0	0	0	0	0	2.49209	6.84424	12.0821	10.2042	6.04069	4.42739	5.46324	3.09348	0	0	0	0
12655	Chil3	0.794839	0	0	0.1	0.16	0	1.41	6.69	3.09	2.54	7.83	2.33	0.09	0.09	0.04	0.1	0	0	0	1.96323	6.79765	26.9285	38.3956	27.6318	19.1906	23.7883	14.1696	0	0	0	0
12651	Chkb	0.316542	0	0	0	0	0	0	0	0.08	0.28	0.13	0.23	0.26	0.28	0.21	0.18	12.0014	7.96656	11.0333	9.95827	8.66118	10.5409	17.5041	21.5024	9.3026	12.2716	12.9185	18.5126	18.9474	5.17437	14.667
12662	Chm	0.252088	0.1	0.06	0.09	0.05	0.04	0.04	0.09	0	0.17	0	0.31	0	0	0	0.05	2.09031	0	1.93723	2.01096	0	1.34179	1.09458	1.31037	1.16972	1.21958	1.77756	1.33946	1.25059	0	0
234852	Chmp1a	0.344681	0.48	0.25	0.3	0.27	0.27	0.25	0.31	0	0.56	0	0	0	0.27	0	0	36.4297	49.356	32.1593	30.8716	36.1736	26.6793	26.3467	34.4759	28.8948	25.9965	24.0562	28.1944	25.916	30.637	22.3985
68953	Chmp2a	0	0.97	0.95	0.64	1.05	0.72	0.86	0.99	1.05	1.56	0.8	1.27	1.25	1.79	0.74	1.27	81.8229	75.7027	81.1243	82.6967	72.7298	75.0185	63.0428	79.9862	74.058	63.3206	56.7621	71.4157	84.052	72.2047	65.2574
68942	Chmp2b	-0.0362209	0.2	0.19	0	0	0	0	0	0	0	0	0	0	0	0	0	11.2996	9.67908	8.98661	10.1484	8.42384	9.84142	8.56673	12.5666	11.9153	13.2103	11.4631	14.576	12.6452	8.06062	8.47883
66700	Chmp3	0.255814	0.86	0.54	0.68	0.63	0.33	0.41	0.24	0.54	0.73	0.52	0.91	0.84	0.83	0.4	0.33	22.7079	19.7262	22.3826	20.9312	18.4659	16.3309	16.4048	17.6499	17.6263	15.1919	14.4359	17.1846	16.8	15.3414	14.9357
75608	Chmp4b	0.786417	2.01	1.51	1.58	1.33	1.18	1.57	1.81	1.31	1.54	1.11	1.01	1.08	0.47	0	0	87.2525	99.0993	88.6929	77.9559	70.482	62.3696	65.7904	60.5107	52.3312	43.2301	42.5778	39.1884	39.8598	42.3158	39.6463
76959	Chmp5	0.211342	0.25	0.31	0.54	0.15	0.25	0	0.36	0	0.52	0	0	0	0	0	0	26.2156	14.6566	24.9001	21.5627	16.3108	20.6294	22.6016	18.3246	18.6808	20.0436	19.2888	19.5284	19.9492	16.0745	19.1486
208092	Chmp6	0.664573	0.17	0.26	0.13	0.14	0	0.09	0	0	0.15	0.2	0.24	0.14	0	0	0	18.8205	22.4831	14.9407	13.8603	13.0737	9.97537	9.27575	13.0706	14.9752	15.1022	12.7598	9.94075	11.774	11.5531	9.1833
105513	Chmp7	0.0190126	0.03	0.03	0.05	0.03	0.03	0.07	0.02	0	0	0.06	0	0	0	0	0	16.851	18.1626	13.2013	11.3659	12.1709	12.0391	13.8059	11.4907	14.0375	14.345	13.2733	14.4434	11.9909	18.4015	11.4783
69993	Chn2	0.338062	0	0	0	0	0	0	0	0	0	0	0	0.06	0	0	0.02	1.50978	1.12837	1.54908	1.91293	2.12207	2.79475	1.92853	6.0061	6.23883	12.5179	9.4044	13.3684	11.7598	7.4508	5.87083
66917	Chordc1	0.312779	1.87	1.78	1.14	0.84	1	0.85	0.74	0.39	0.39	0.62	0.75	0.57	1.25	0.94	1.44	26.7447	14.576	21.3377	15.923	9.4211	12.1388	10.79	8.24623	12.2933	9.69719	10.085	8.16738	7.41752	5.9847	10.5345
56398	Chp1	0.569392	0	0.13	0	0.09	0	0.08	0.11	0	0.53	0.66	0.63	0.99	0.3	0.12	0.28	35.7072	38.9056	43.4004	44.8076	51.7862	55.3482	71.9297	110.963	79.1611	94.2836	71.0056	118.896	131.074	71.5479	69.3578
212862	Chpt1	0.372486	0	0	0	0	0	0	0	0	0	0	0	0	0	0	0.41	0	0	0	1.56345	1.10547	1.21863	1.19225	1.69766	2.01494	3.61726	3.0514	8.19848	11.0199	20.087	19.6219
93696	Chrac1	0.421681	0.2	0.46	0.35	0	0.19	0	0	0	0	0	0	0	0	0	0	24.3649	20.4434	20.6149	20.4622	19.994	14.9954	17.6024	24.5481	17.5181	17.6464	19.7875	22.1428	20.1479	15.3025	10.5884
214901	Chtf18	0.813972	0.05	0.12	0.04	0.06	0.05	0	0	0	0	0	0	0	0	0	0	14.3762	16.8461	12.6856	11.0553	10.6794	6.13334	4.38273	5.01182	4.82703	2.69124	2.66896	1.26573	1.29244	0	0
66511	Chtop	0.220804	0.63	0.12	0.11	0	0	0	0.15	0.28	0.13	0	0	0	0	0	0.14	75.8452	51.8722	55.3916	58.3707	43.1042	38.1288	26.6639	34.4175	31.8409	29.3453	26.4043	25.4038	29.9498	16.7664	17.2953
12675	Chuk	0.568885	0	0.01	0	0.01	0	0.01	0	0.01	0.01	0	0.01	0.03	0.08	0	0.09	10.9713	5.94547	8.40829	8.21951	5.80452	7.11916	7.78723	11.3274	10.1896	10.5948	11.6464	12.8242	14.8492	9.90506	16.4816
211151	Churc1	0.309295	0.67	0	0	0	0	0	0	0	0	0	0	0	0	0	0	18.6044	18.4773	15.5805	16.6989	12.9878	10.8329	9.47644	14.0755	15.2974	16.51	19.1431	14.4226	20.6139	17.7721	14.6527
26371	Ciao1	0.470384	0.27	0.26	0.27	0.16	0.19	0.24	0.18	0.15	0.11	0.12	0.27	0.19	0.2	0	0.15	14.4377	14.3517	12.5389	11.9336	11.0139	13.0941	9.6224	8.57769	7.91089	7.33244	7.79217	10.215	9.15269	12.1968	9.07763
68250	Ciao2a	0.0304115	0.15	0.31	0.32	0.23	0.11	0.55	0	0	0.37	0.32	0.25	0.26	0.48	0.18	0.2	86.8409	76.1056	89.9189	75.069	52.796	51.8585	42.3951	37.7028	38.7085	29.5097	35.8218	26.1305	38.0784	29.8668	24.3168
68523	Ciao2b	-0.0407296	0.16	0.23	0.16	0	0	0	0.18	0	0.5	0.66	0.88	0.16	0.25	0	0	30.1668	32.1105	20.6942	19.065	23.2153	10.0945	16.4934	12.9136	15.8308	14.5279	18.2475	10.8989	14.8385	19.1839	18.123
67563	Ciao3	0.348078	0.08	0.1	0.05	0.09	0.05	0	0.01	0	0.06	0.05	0.05	0.04	0.2	0.16	0.19	8.33171	10.0598	7.26253	6.68996	7.58774	6.62695	6.50724	7.20864	5.98536	5.78694	6.43058	5.3808	6.34305	10.6313	7.45588
109006	Ciapin1	0.346429	0.84	0.73	0.59	0.48	0.41	0.26	0.44	0.57	0.62	0.3	0.42	1.32	0.34	0	0.32	32.0694	39.277	25.4856	25.5032	10.6719	18.8957	14.0034	24.411	16.2076	12.2464	16.0907	8.78229	15.2898	19.3345	7.73178
23991	Cib1	0.144583	0.15	0.13	0.26	0.16	0.05	0	0	0	0	0	0	0	0	0	0	43.1851	49.5531	41.2913	38.3146	36.4898	32.2343	29.7387	38.4988	39.1245	32.5628	39.196	30.582	55.3004	72.7447	60.8864
12684	Cideb	0.52102	0	0	0	0	0	0	0.71	0	0.79	0.22	0	0.21	0.2	0.35	0.23	11.5968	14.2226	23.4288	34.2236	50.8434	60.3657	82.9802	117.802	87.7929	111.023	135.806	153.894	143.991	207.868	130.979
224171	Cip2a	0.69954	0.12	0.14	0.09	0.05	0.06	0.04	0	0	0	0	0	0	0	0	0	11.7874	4.09539	12.275	10.7405	3.47884	6.43591	3.76709	3.11294	4.5436	2.65454	3.53112	1.81375	0	0	0
12696	Cirbp	0.472283	0	0	0	0	0	0	0	0.97	1.36	1.01	0	0	0	0	0	9.47965	10.6843	8.21775	7.08167	11.468	9.11846	10.0071	25.7968	11.3618	13.6449	10.2197	20.339	14.4303	7.13216	7.03742
52637	Cisd1	0.825	0.69	1.72	2.03	1.44	1.31	2.15	1.93	9.03	17.59	29.5	42.71	54.36	46.67	53.58	35.26	37.2005	41.2764	33.32	29.0783	28.3814	37.0367	56.9927	88.2666	62.3016	65.7894	61.115	131.628	151.861	109.735	49.3852
67006	Cisd2	-0.335714	0.67	0.88	0.9	0.5	0.32	1.03	0.37	0.74	1.73	1.29	2.04	0.99	0.95	1.49	1.79	13.903	10.954	13.1482	12.5314	8.76803	8.45923	7.71074	8.96084	9.86501	7.41319	8.31588	7.4038	10.7176	6.83692	9.39105
12704	Cit	0.8812	0.3	0.14	0.11	0.06	0.06	0.02	0	0	0	0	0	0	0	0	0	15.4102	19.0346	16.0048	14.2152	12.0359	7.81614	5.81988	2.23026	3.39973	1.84623	1.77338	0	0	0	0
68379	Ciz1	0.433013	0.01	0	0	0	0	0	0	0	0	0	0	0	0	0	0	30.0922	23.1695	22.2568	22.7817	20.5097	19.4039	15.2507	15.2455	10.8112	13.2784	13.8111	17.8262	9.23829	7.24835	8.72831
80986	Ckap2	0.371486	0.02	0	0	0	0	0	0	0	0	0	0	0	0	0	0	16.6099	8.38631	17.4496	15.9894	8.21792	9.82412	6.68572	5.77059	7.16193	4.78049	6.55146	3.53411	1.48594	0	0
216197	Ckap4	-0.0554563	0.74	0.51	0.79	0.64	0.74	1.03	0.79	0.87	1.72	2.03	1.02	1.04	1.08	0.09	0.3	19.0996	18.8361	11.2968	11.3348	13.9973	14.1345	14.868	10.9317	12.2017	10.9179	8.56899	4.48259	2.77404	1.16561	0
75786	Ckap5	0.902368	0.58	0.57	0.25	0.39	0.21	0.19	0.14	0.13	0.09	0.09	0.07	0.09	0.07	0.04	0.05	14.8029	6.62948	13.5958	13.6215	5.48078	7.05048	4.12315	4.38883	5.77426	3.16487	0	0	0	0	0
12709	Ckb	0.246429	1.88	1.48	1.66	1.9	1.97	2.55	2.93	3.68	6.02	6.47	7.83	3.85	3.02	1.29	0.95	28.7939	32.4293	20.6679	24.0971	26.934	25.6842	25.2517	19.5899	30.1217	26.2987	26.7202	14.5674	12.6143	10.2053	6.74619
66197	Cks2	0.765438	2.98	2.04	0.82	1.31	1.1	0	0	0	0	0	0	0	0	0	0	186.669	151.948	204.028	186.034	127.257	133.478	83.0973	70.2993	69.2688	52.6615	64.3104	37.317	33.8682	14.6294	13.223
76707	Clasp1	0.824958	0.08	0.13	0.05	0.07	0.09	0.06	0.05	0.04	0.03	0.02	0.08	0	0	0	0	6.33204	5.90503	5.39964	5.55395	3.73398	2.80955	2.35431	2.00137	2.76757	2.2526	2.2329	1.50404	1.11893	0	1.05315
76499	Clasp2	0.853825	0.13	0.13	0.11	0.07	0.06	0.04	0.07	0.01	0.04	0.01	0.05	0	0	0.01	0	6.6977	3.75633	5.78194	5.50712	2.83403	3.18883	2.46876	2.23472	2.43707	2.13815	1.95684	1.95797	1.48345	0	0
12722	Clca3a1	0.767003	0	0.02	0.06	0	0.02	0.05	0.11	0.22	0.35	0.17	0.31	0.05	0	0	0	2.38087	1.20329	2.44995	3.1744	2.20628	4.8284	7.41831	8.1803	6.42524	7.03501	6.51608	4.87021	2.57017	0	1.67935
229725	Clcc1	0.423593	0.09	0.07	0.11	0.12	0.11	0.16	0.18	0.13	0.23	0.45	0.56	1.02	0.55	0.25	0.26	12.1326	9.50608	12.3514	12.7229	10.072	10.6202	8.74217	10.5172	11.5376	11.8773	14.0108	16.324	19.7179	7.22128	12.0535
12725	Clcn3	0.165985	0	0	0	0.01	0	0	0	0.01	0.01	0	0.02	0	0	0	0	22.1481	12.3391	27.3923	26.3783	15.6309	20.0527	11.6305	13.7584	15.2735	11.8727	10.3384	6.73585	5.40272	2.97897	5.0085
12737	Cldn1	0.536269	0	0	0	0	0.38	0.43	0	0	0.36	0.26	0	0	0	0	0	6.67455	6.62151	14.9195	23.6323	38.077	67.4624	63.2473	45.074	51.8038	69.3982	51.5116	55.9514	25.8343	20.94	12.622
57255	Cldn13	0.374513	0	0.09	0	0	0	0	0	0	0	0	0	0	0	0	0	130.238	163.535	190.217	150.362	150.809	113.353	73.6853	52.757	60.0509	17.0161	17.4152	0	0	0	0
12739	Cldn3	0.863848	0	0	0	0	0	0	0	0	0.28	0.32	0.62	1.52	0.84	0.78	0.45	1.23065	1.25378	0	1.4834	2.37724	3.8374	6.63853	51.4173	84.1231	110.977	138.603	116.368	102.336	147.498	70.1072
56760	Clec1b	0.123718	0	0	0	0	0.48	0	0	0	0	0	0	0	0	0	0	12.0512	9.51993	8.64002	10.1236	9.85141	9.83897	11.0095	16.2941	3.70589	10.7737	2.77163	7.82663	4.46382	4.40558	2.29743
93694	Clec2d	0.407931	0	0	0	0	0	0	0	0.1	0	0.06	0.08	0	0.4	0	0	1.42117	1.21601	1.54031	3.26837	3.62606	6.67301	10.0969	16.5525	19.2922	19.7309	16.2433	27.3302	48.5594	32.9426	22.1234
51811	Clec4f	0.74194	0	0	0.05	0.11	0	0.4	0.6	0.65	0.92	1.65	1.62	1.29	2.35	1.03	1.7	1.48724	1.34328	2.87489	6.29714	13.1153	26.8849	62.7115	54.3671	66.8941	75.5277	64.3127	62.8285	60.9571	61.6599	48.8097
75863	Clec4g	0.564187	0	0	0	0	0	0	0	0	0	0.18	0	0	0.07	0.2	0	1.71619	2.02113	2.3437	2.64683	6.65216	9.72	16.2401	26.818	21.3853	34.2848	30.9417	41.3977	34.3881	32.9594	24.1677
114584	Clic1	0.414286	6.78	5.58	5.48	3.9	4.41	5.41	5.89	5.49	7.69	5.97	7.72	3.35	2.06	1.38	1.24	81.0915	84.1021	61.5959	69.4215	65.614	55.3396	55.8988	51.9989	43.8033	34.4877	30.9183	20.6361	14.4772	15.1996	9.0712
29876	Clic4	0.625	6.06	6.3	6.69	4.37	4	4.5	3.92	3.55	5.07	4.75	5.13	4.44	4.59	3.06	3.64	65.8196	65.744	67.211	57.7756	54.3065	39.395	27.7516	26.7487	34.3071	30.3977	23.8369	18.1932	15.8092	13.8052	11.2541
216705	Clint1	0.00357143	2.04	1.62	1.8	1.27	1.46	1.64	2.2	1.78	1.93	2.66	2.71	2.8	1.67	1.04	1.15	52.4563	37.6134	33.5526	40.7856	46.1083	31.9948	25.079	20.9275	28.4474	21.3547	15.9869	18.2075	10.5731	8.57925	8.929
56430	Clip1	0.535365	0.19	0.07	0.14	0.15	0.06	0.12	0.06	0.09	0.21	0.12	0.22	0.15	0.13	0.05	0.08	4.64171	3.49796	4.07334	5.69594	2.76156	3.43773	2.97916	3.98557	3.92351	5.61761	2.97215	5.9982	4.16864	1.68566	3.67414
269713	Clip2	0.763953	0.04	0.05	0.04	0	0.01	0	0	0.01	0	0.02	0	0	0	0	0	3.51643	3.78036	2.66651	2.43952	2.64457	1.70707	1.38024	1.68826	2.0993	2.42546	2.40194	1.58055	0	0	0
102414	Clk3	0.783322	0.09	0.05	0.12	0.09	0.11	0.07	0	0	0	0	0	0	0	0	0.01	52.5698	52.6418	54.3163	60.0834	56.0588	47.3361	30.8219	20.9828	20.532	11.4633	11.8887	9.65907	9.27056	8.57192	9.28543
94040	Clmn	0.900919	0	0	0	0	0	0	0	0.06	0.1	0.05	0.11	0.12	0.13	0.25	0.15	0	0	0	0	0	1.01421	1.50011	2.27506	3.45471	4.08579	3.66373	7.87396	4.02662	5.21924	4.54183
76524	Cln6	0.433013	0	0.03	0	0	0	0	0	0	0	0	0	0	0	0	0	19.3923	27.947	21.3467	19.2887	19.5602	14.425	11.772	15.7452	10.0784	8.34678	7.83916	13.0148	3.61491	1.79226	1.49151
12729	Clns1a	0.745394	1.83	1.04	0.61	0.38	0.51	0	0	0.49	0	0.28	0	0	0	0	0.19	60.9037	53.772	45.9486	37.5513	26.8116	21.575	19.3709	21.4187	20.7691	17.7709	17.7974	14.2172	16.3127	16.0614	14.3034
98985	Clp1	0.499313	0.07	0	0	0.07	0	0	0	0	0	0	0	0	0	0	0	24.4531	22.9344	30.0444	25.8993	18.6107	20.3215	14.1039	12.3354	10.216	6.62983	7.70909	6.27921	5.08189	7.97238	12.8814
20480	Clpb	0.109124	0.12	0.12	0.18	0.14	0.1	0.1	0.27	0.15	0.97	0.42	2.25	0.94	1	0.22	0.69	9.6359	9.44372	7.02096	6.40071	8.26712	2.94317	4.58769	3.48745	9.53057	10.335	6.9679	7.42798	7.92949	12.7749	7.58215
53895	Clpp	-0.0214286	1.54	0.68	0.81	1.16	0.66	1.34	1.15	1.75	1.67	1.98	1.89	1.91	1.72	2.98	2.96	48.4141	57.0289	38.3551	36.521	35.4544	27.2948	24.673	33.2185	27.4831	21.6721	27.2235	28.0212	44.9033	64.6559	47.4192
109791	Clps	-0.132652	0	0	0	0	0	0.73	0	0	0	0	0	0	0	0	0	0	0	1.25547	1.00088	0	0	0	1.15739	0	0	0	0	0	0	0
56457	Clptm1	-0.0483006	0.45	0.27	0.25	0.32	0.38	0.77	0.24	0.25	0.84	0.8	0.78	1.07	0.32	0.33	0.47	33.4041	45.6324	27.3942	29.609	32.2004	21.4907	21.1064	24.2343	27.9186	28.9258	28.9013	20.3741	25.7481	38.6711	26.5208
218335	Clptm1l	-0.319951	0	0	0	0	0	0	0	0	0	0.06	0.08	0	0	0	0	51.2247	56.4451	43.1157	42.4716	38.306	32.3223	24.9684	28.1885	36.3285	30.9795	30.3474	19.9477	32.7998	40.6823	35.6907
270166	Clpx	0.746429	0.27	0.28	0.33	0.26	0.37	0.49	0.56	1.26	2.56	1.82	2.31	2.5	1.76	2.04	1.91	14.2751	10.5211	14.179	16.3195	12.6117	25.8587	33.6719	60.5851	39.5149	56.7864	57.6655	84.6286	68.4881	44.9509	65.8218
269582	Clspn	0.658446	0.03	0.04	0.05	0	0	0	0	0	0	0	0	0	0	0	0	14.1463	10.474	16.4581	13.3425	7.73529	6.852	4.49931	3.78356	5.25968	3.12262	2.28933	0	1.07088	0	0
12757	Clta	-0.223414	8.61	5.43	4.99	6.13	6.25	7.57	12.16	9.59	13.79	16.22	21.04	13.38	6.25	6.19	6.54	165.45	184.408	136.977	132.027	116.017	112.6	98.1477	121.252	139.811	109.387	109.999	112.425	104.964	96.8607	71.7142
74325	Cltb	-0.0714286	1.72	1.54	1.49	1.04	1.51	1.29	2.07	2.77	4.02	3.57	6.64	6.09	6.1	7.64	6.18	25.3396	33.7425	24.0008	23.5215	18.5761	14.9539	11.622	12.4756	12.2054	12.0497	12.2577	13.5681	21.6946	31.7023	28.6201
67300	Cltc	-0.439286	6.39	5.92	6.2	6.96	6.02	8.79	9.11	9.58	14.79	14.89	16.56	15.84	12.96	9.6	8.41	52.0689	27.1166	54.7252	51.9182	27.7942	32.614	24.4135	22.5469	31.9911	29.6767	24.3538	15.2548	16.593	8.65753	15.2153
12759	Clu	0.828571	0.25	0.27	0.49	0.17	0.11	0.37	0.51	0.36	0.9	0.68	1.11	1.17	1.53	1.31	1.92	33.096	31.865	30.2388	34.6483	58.5163	43.3255	68.8632	151.09	192.109	294.328	290.607	444.447	353.848	1173.4	1102.93
74148	Cluh	0.650581	1.43	2.55	1.41	2.42	1.62	2.43	1.42	3.74	3.65	3.21	4.2	3.82	3.46	2.55	1.71	41.707	54.75	35.0862	37.4474	43.3823	35.7884	36.9772	55.6185	48.5189	56.6223	45.3376	49.6391	55.8597	57.9821	35.9222
69634	Clybl	0.275	0.19	0.23	0.34	0.2	0.29	0.4	0.84	0.9	1.58	2.84	3.58	5.29	3.7	4.99	4.37	18.3081	16.7575	18.4124	16.5856	15.5184	15.3837	13.196	15.2035	14.9343	16.4354	17.813	27.0722	29.5418	26.2329	16.3344
12763	Cmah	0.81409	0	0	0	0	0	0	0	0	0	0.2	0	0.26	0.71	0.44	0.53	0	0	0	0	0	0	0	0	1.48548	3.36162	1.60679	1.45234	3.27331	6.15306	7.71617
12764	Cmas	-0.772118	0.45	0.33	0.35	0.42	0.4	0.44	0.42	0.65	1.06	0.97	1.3	1.03	0.88	1.19	1.16	98.369	98.3318	123.193	133.232	108.395	117.035	86.248	69.8765	51.5036	34.6103	29.8148	19.7226	17.3245	19.8654	17.8834
69574	Cmbl	0.885714	0	0.03	0.17	0.26	0.38	0.68	1.63	2.77	6.05	7.8	9.61	11.28	12.8	15.56	17.65	0	1.31374	1.2715	3.30268	6.00422	8.36512	17.5517	17.261	27.3896	33.3415	46.5639	33.626	22.4671	49.8316	24.2745
67899	Cmc1	0.617797	0	0	0	0	0	0	0	0	0	0	0	1.7	0.88	0	0.69	4.48269	3.33882	4.28185	4.19536	3.24196	3.68802	3.18727	4.92985	3.75725	4.98235	6.10075	5.83699	6.94711	4.57929	5.11938
66531	Cmc2	0.227505	0.47	0.28	0	1.03	0	0	0	0	0	0	0	0.59	0	0	0.41	24.5853	13.4422	12.2526	18.8241	10.587	7.55671	8.70379	11.6686	4.2986	3.2141	7.49686	4.01561	4.85906	5.32322	4.23865
74440	Cmip	-0.247436	0	0	0	0	0	0	0	0	0.03	0	0	0	0	0	0	19.1622	21.9165	19.4726	21.0401	24.0013	22.0121	21.9544	19.1804	16.8447	20.8097	18.7076	24.1663	8.59497	8.80986	5.60783
66588	Cmpk1	-0.182143	4.12	3.79	4.5	3.83	3.73	4.89	6.54	7.23	8.43	9.94	11.07	13.15	16.89	15.06	17.24	18.9126	20.7008	23.4103	15.0518	13.8781	16.8206	11.9038	12.5758	17.5538	15.9516	17.7215	16.9704	15.5326	14.7796	14.8236
22169	Cmpk2	-0.125224	0.29	0.12	0.14	0.14	0.13	0.15	0.71	0.52	0.68	1.44	0.23	0.12	2.99	0.4	1.64	4.5687	5.22227	7.28549	5.90543	3.81667	6.17341	15.7932	9.95513	7.59748	5.0491	3.10933	3.57211	1.31933	2.48161	2.01105
66497	Cmss1	0.54935	0	0.11	0.07	0	0	0	0	0	0	0	0	0	0	0	0	20.0568	22.0267	15.1673	12.4897	11.2275	8.65341	6.54789	6.68405	6.11449	4.58444	4.36394	4.40277	3.62223	2.79677	3.08378
12785	Cnbp	-0.0607143	4.69	3.35	2.69	4.48	5.11	5.88	6.22	3.82	5.38	3.77	4.92	4.8	1.89	2.79	0.44	217.237	153.551	173.955	162.682	108.502	132.459	102.056	132.972	107.937	97.7072	102.008	134.358	148.698	74.6588	77.768
66054	Cndp2	0.025	2.31	2.2	2.68	2.85	2.21	3.01	3.51	4.62	9.42	7	11.39	7.45	9.34	8.73	7.31	29.6144	30.5404	22.4632	19.5786	23.7109	18.8593	20.8174	23.9147	24.2632	21.7196	24.2572	15.8364	25.2168	34.269	17.8008
12798	Cnn2	0.646429	1.85	1.58	0.67	0.49	1.01	0.88	0.83	1.28	1.67	1.49	1.7	0.27	0.8	0	0.19	41.9303	33.9033	24.5151	24.1824	35.4973	24.8152	27.452	26.6439	26.3805	23.0275	17.0399	7.5225	6.62594	3.45053	2.17889
71994	Cnn3	0.475	1.95	1.72	1.62	1.19	1.75	1.98	1.29	2.26	3.32	2.23	3.28	2.13	5.92	1.99	2.25	61.3469	47.983	49.7414	51.8371	43.7767	45.1771	51.171	65.1562	69.2522	78.805	76.6175	71.9524	76.6148	40.1784	33.4674
234594	Cnot1	0.248882	0.34	0.33	0.39	0.19	0.25	0.22	0.16	0.24	0.36	0.26	0.36	0.25	0.1	0.19	0.9	23.0055	18.5189	20.9492	18.8781	14.5812	11.3843	11.6106	12.2484	14.3682	13.5374	9.19843	8.38741	8.57294	5.44873	5.55681
78893	Cnot10	0.233633	0.04	0.06	0.05	0.04	0.03	0.04	0.03	0.03	0.07	0.05	0.23	0.05	0.03	0.04	0	19.1082	19.0659	18.2077	17.8309	14.2723	14.2368	10.6124	13.6126	11.8128	10.8697	10.0638	10.5907	8.91245	5.48401	5.43522
52846	Cnot11	0.346153	0.04	0.1	0.04	0.03	0.03	0.01	0	0.05	0.13	0	0	0.14	0.07	0	0	13.5146	14.5044	11.9768	9.598	9.02588	6.12371	6.2237	6.55398	6.53173	5.81674	5.4936	4.6155	5.88131	5.71069	5.37274
72068	Cnot2	0.710741	0.06	0.08	0.1	0.08	0.06	0.05	0	0	0	0	0	0	0	0	0	21.6932	13.8896	17.5905	18.8893	9.88223	13.6584	11.3285	12.0541	11.8288	12.2431	8.75839	10.8979	7.98836	4.48738	7.24159
232791	Cnot3	0.756489	0.51	0.34	0.67	0.45	0.29	0.39	0.55	0	0.1	0	0.11	0.28	0	0	0	29.6548	32.6861	23.932	21.7876	24.4899	18.9242	16.1498	13.7809	14.7316	10.6554	11.1158	8.87835	10.0243	7.76639	7.44989
53621	Cnot4	0.757474	0.15	0.07	0.02	0.05	0.09	0	0.04	0	0	0	0	0	0	0	0	6.81466	4.22242	6.31225	5.56353	3.58688	3.9747	3.72669	3.01184	3.1495	2.33454	2.15868	0	1.95461	1.23841	2.11286
231464	Cnot6l	0.371154	0	0	0.01	0	0	0	0	0	0	0	0	0	0	0	0	5.03678	3.79335	5.24164	5.55776	2.71376	3.47382	3.54793	3.99449	2.81362	3.88502	2.8792	4.31637	3.28308	1.40077	2.15638
18983	Cnot7	0.331545	0.09	0.06	0.05	0.04	0.05	0.04	0.08	0.06	0.05	0.07	0.12	0.04	0.03	0	0	12.8187	6.38281	10.0527	10.4473	5.62336	8.44146	6.59561	6.72633	5.28102	6.31552	7.38107	7.59316	6.49797	2.9024	4.34613
69125	Cnot8	0.499601	0.14	0.1	0.08	0	0.04	0	0	0	0	0	0	0	0	0	0	21.1812	16.6193	17.6454	16.0696	11.5358	14.0397	12.1368	11.3858	12.1902	12.9385	13.7023	13.854	12.7261	13.2753	13.3437
58184	Cnot9	0.189625	0.78	1.13	0.78	0.18	0.39	0.51	0.42	0.13	0.72	0.86	0.72	1.42	0.87	0	0.31	22.7592	24.8027	20.9635	18.3626	15.4804	11.6537	10.0347	11.6436	11.745	10.2196	11.25	6.74047	6.96955	4.17225	3.98334
12799	Cnp	0.232379	0	0.04	0.03	0	0.14	0.1	0.05	0	0.2	0.21	0.26	0	0	0	0.16	5.39822	8.59788	5.98479	6.09728	7.23768	6.14088	8.18921	10.8938	10.4369	8.70598	6.99736	4.57838	4.32334	9.15949	4.49729
56530	Cnpy2	0.785714	2.45	2.43	2.57	2.69	3.31	4.54	4.79	4.77	6.2	7.75	13.36	18.29	12.67	6.58	4.97	53.4124	50.3226	50.6639	49.1147	43.8436	46.8359	59.698	51.3936	59.4152	62.7133	71.4001	68.6183	81.9615	81.6084	69.1116
72029	Cnpy3	0.0644586	0.22	0.19	0.1	0.17	0.18	0.39	0	0.18	0.24	0.43	0.27	0.5	0.78	0	0.43	19.884	25.1672	16.5831	14.6952	19.5483	15.591	13.9749	16.7746	19.1808	17.215	19.4097	14.1547	19.4983	31.342	25.7177
66455	Cnpy4	0.167857	0.88	1.18	1.35	1.39	1.26	0.53	1.63	1.36	1.55	0.59	2.95	1.03	1.4	0	0.39	13.7417	7.91811	10.2776	9.10843	5.00364	7.81141	5.44436	4.02782	3.79967	4.91502	5.20605	4.17591	3.28663	1.92752	3.04526
380686	Cnrip1	-0.093522	0	0	0	0	0	0	0	0	1.13	1.35	0	0	0	0	0	2.6862	0	1.1174	1.06435	0	1.42879	1.12729	1.65388	1.26416	0	1.0015	1.28634	0	0	0
52469	Coa3	-0.0846114	0	0	0.36	0.6	0	0.33	0	0	0	1.17	0	1.72	1.04	0	0	71.441	85.0189	64.0242	51.7661	50.0537	41.9124	37.3098	33.4909	46.7044	40.6162	48.2875	40.4516	71.5928	68.1511	44.0818
76178	Coa5	0.0301841	0	0	0	0	0	0	0	0	0	0	0	0.37	0.15	0	0	27.5838	28.9209	23.3544	18.0799	15.6478	12.9169	11.6469	14.9574	14.5922	12.4601	11.2267	14.1037	15.7461	14.781	12.9462
69893	Coa7	0.580876	0.12	0.07	0.07	0.13	0.08	0.31	0.38	0.61	0.9	1	0.99	1.11	0.49	0.47	0.27	6.80231	4.48551	4.15985	3.84602	3.90359	3.51088	3.89376	5.84238	5.70107	5.91415	6.85434	6.06131	6.84382	5.61703	5.14981
71743	Coasy	0.8	0.32	0.82	1.99	1.41	1.23	1.39	1.25	2.19	3.51	4.4	5.36	6.79	5.55	5.84	4.13	14.5144	18.5578	14.2252	12.3653	12.8847	13.4194	18.9347	29.7046	24.5414	29.1352	27.596	37.08	50.8778	49.6063	36.0991
12808	Cobl	0.488504	0	0	0	0	0	0	0	0	0	0	0	0	0	0	0.04	0	0	0	0	0	0	0	0	1.38222	1.373	0	1.16816	1.5513	1.13542	1.65738
319876	Cobll1	0.627244	0	0	0.01	0.03	0.01	0.03	0.05	0.2	0.34	0.23	0.34	0.24	0.4	0.32	0.41	1.66535	1.33322	2.69633	2.62954	3.11885	2.92292	2.05058	5.55042	3.26874	5.72733	3.35472	6.18688	4.834	2.32345	3.40611
16834	Cog1	-0.385654	0.08	0.02	0.04	0	0.01	0.02	0.12	0.06	0.11	0.26	0.05	0.17	0	0	0.69	11.5021	12.598	9.49747	9.80848	9.70213	8.37385	6.54417	5.88494	5.82247	5.42136	4.73292	3.77136	4.04842	5.94914	5.15455
76332	Cog2	0.0630062	0.01	0.06	0.03	0.02	0.03	0.02	0.03	0.02	0.02	0.19	0.02	0	0.02	0	0.04	9.01378	10.2174	8.11276	8.26236	8.5318	5.90037	5.27594	5.98158	6.47546	6.06814	6.5667	5.17546	4.37539	6.6216	4.8841
338337	Cog3	-0.268819	0.13	0.05	0.04	0.12	0.07	0.04	0.09	0.08	0.24	0.14	0.19	0.25	0.15	0.04	0.11	5.99633	4.51633	5.87925	5.16835	3.67853	5.02018	4.55419	4.71125	4.00007	3.82487	3.57782	3.52824	2.79281	1.68358	2.92932
102339	Cog4	-0.174623	0.08	0.06	0.07	0.04	0.04	0.09	0.2	0.05	0.07	0.03	0.1	0.1	0.1	0.04	0.22	15.1695	18.5031	15.697	12.9905	12.6122	12.1936	11.3251	11.1328	14.6633	17.7426	15.4076	14.3994	13.73	20.8484	16.5255
238123	Cog5	0.39593	0.09	0.02	0.01	0.28	0.01	0.03	0.03	0.01	0.02	0.05	0	0	0	0	0.03	2.67381	1.30952	1.97486	1.75628	1.34778	0	0	1.21215	1.34165	1.73653	1.09523	0	1.03507	0	0
67542	Cog6	0.149247	0.12	0.02	0.08	0.04	0.09	0.04	0	0	0	0	0	0	0	0	0	6.73655	6.13268	5.6802	5.83557	4.75649	4.73623	4.78916	4.03576	5.93333	6.0568	6.0195	5.39985	5.1576	4.86442	4.85346
233824	Cog7	-0.290586	0.05	0.02	0.02	0.06	0.07	0.08	0	0	0.04	0.15	0.14	0.12	0.04	0.07	0.06	7.71673	6.53245	7.02907	6.80117	6.2727	4.53732	4.88357	6.14943	4.50693	5.67371	4.48683	5.52585	5.1472	4.82944	5.44885
97484	Cog8	0.350385	0	0.01	0.01	0	0	0.02	0	0	0	0	0	0	0	0	0	16.2234	18.6091	15.9147	13.2589	11.5767	10.9963	10.2446	10.1738	10.7241	9.88403	10.4739	9.17078	11.5082	16.4199	13.864
12812	Coil	0.371154	0.01	0	0	0	0	0	0	0	0	0	0	0	0	0	0	5.21144	5.38853	5.11569	3.55569	3.16608	2.4192	2.2304	2.60255	1.73212	2.40031	2.08356	1.61983	1.20908	1.20932	1.18504
12818	Col14a1	0.842857	0.13	0.26	0.54	0.63	0.51	1.14	1.61	2.09	3.08	2.53	3.19	3.31	1.1	0.8	0.48	6.60168	7.91756	7.82582	9.41597	10.3337	11.0518	14.5772	15.7213	20.916	30.8131	26.0685	12.7524	10.5936	4.01007	3.69766
12822	Col18a1	0.863271	0.13	0.17	0.23	0.25	0.25	0.61	1.1	0.55	0.8	1.43	1.62	1.26	0.36	0.64	0.35	26.2124	39.6868	38.1209	49.7369	109.394	111.275	172.659	156.659	200.685	260.704	210.896	282.585	219.633	234.468	145.581
12842	Col1a1	-0.453571	0.06	0.12	0.02	0.05	0	0.1	0.19	0.57	0.68	0.96	1.47	2.59	0.83	0.56	0.89	62.6965	69.0162	28.8167	27.9072	38.371	20.3579	11.8697	26.383	28.5042	31.0725	26.5211	14.6888	10.6482	3.91628	3.36044
12843	Col1a2	-0.2395	0.06	0.15	0.17	0.27	0.1	0.52	0.42	0.31	0.38	0.54	1.18	1.53	0.67	0.38	0.32	41.6734	40.9088	14.3688	16.637	28.5708	15.7835	10.1574	23.7795	19.0377	37.3388	29.5181	20.3281	12.4966	2.85093	1.63609
12825	Col3a1	0.403347	0.02	0	0.01	0	0	0	0	0	0	0	0.03	0.05	0	0	0	54.2706	47.7234	28.2983	26.6659	31.7428	19.6817	14.0953	36.1985	45.7389	66.6198	49.0895	37.4377	33.3905	7.41332	5.1415
12826	Col4a1	0.597496	0.02	0.02	0.04	0	0	0.07	0.08	0.25	0.45	0.35	0.53	0.31	0.17	0.16	0.09	18.3163	16.6551	14.009	16.4758	20.7212	19.1344	24.328	22.3494	35.0953	40.4339	34.7461	21.2396	18.9512	7.98015	8.33663
12827	Col4a2	0.67869	0.01	0.01	0	0	0.01	0.05	0.04	0.15	0.28	0.13	0.33	0.13	0.13	0.1	0.07	10.8236	12.3901	8.55595	9.4518	13.4281	10.3086	13.5845	14.3196	23.0853	25.6931	21.1466	17.2833	15.337	7.43177	5.58477
68018	Col4a3bp	0.452839	0.13	0.1	0.19	0.13	0.12	0.11	0.16	0.27	0.24	0.18	0.19	0.19	0.16	0.11	0.09	7.29387	3.78723	8.16124	7.75495	4.60004	6.63719	5.0637	6.17493	5.77861	5.00171	4.64146	6.26953	4.2914	1.62146	2.46518
12833	Col6a1	0.128571	0.07	0.1	0.33	0.24	0.65	0.36	0.91	0.97	1.49	1.18	2.74	1.44	0.79	0.73	1.55	8.66865	9.25496	5.50014	5.66277	9.20739	5.01858	4.5937	10.6829	9.25181	10.2367	9.56557	5.69467	6.33028	1.88552	1.7924
12834	Col6a2	-0.253571	0	0.02	0.1	0.48	0.17	0.66	0.21	0.89	0.59	0.42	1.1	0.32	0.46	0.36	0.47	9.19225	11.1254	6.27596	5.86148	10.4782	6.04873	4.01809	8.28816	8.13107	8.37153	6.86537	4.50762	2.70065	0	1.66938
12835	Col6a3	-0.0196956	0.07	0.07	0.13	0.1	0.1	0.23	0.31	0.64	0.87	0.67	1.33	0.66	0.68	0.8	0.72	3.45538	2.59466	1.80122	1.54227	2.24911	1.40659	1.27021	2.08907	3.70311	3.78361	3.14355	2.54777	2.07972	0	0
17846	Commd1	0.602482	0.39	0.69	0.39	0.16	0	0	0	0	0	0	0	0.19	0	0	0	9.42763	13.546	9.23508	9.19466	9.40047	7.97192	8.25199	5.4792	8.6371	8.4945	10.2313	8.5683	7.55996	8.45395	5.70922
69456	Commd10	-0.172134	0	0	0.09	0.12	0	0	0	0	0	0	0	0.4	0	0	0.12	10.7606	9.58328	8.09182	8.31904	8.68862	7.27845	6.99658	6.70634	5.46087	6.3949	8.14791	6.59865	6.99682	4.26681	3.03335
52245	Commd2	0.173369	0.54	0.43	0.4	0.17	0.26	0.22	0.32	0.27	0.3	0.36	0.72	0.95	0.47	0.3	0.35	5.10069	4.67795	4.45773	3.47771	2.81787	2.79155	2.99266	3.04492	3.37538	2.91492	3.82729	2.06263	2.80512	2.64653	1.45427
12238	Commd3	0.535714	1.05	0.86	2.27	0.59	0.74	1.13	0.89	0.96	1.16	1.25	1.59	1.04	1.78	0.67	1.23	32.6153	20.5054	28.293	28.3956	23.6572	24.9916	24.4357	34.9083	29.9939	32.8589	32.5351	30.1842	47.5111	22.7637	28.0039
66199	Commd4	0.461462	0.52	0.05	0.05	0.04	0.38	0	0	0	0	0	0	0	0.23	0	0.12	28.738	30.8362	27.5067	21.7494	20.9836	21.6798	21.864	22.2299	21.7647	16.042	19.9851	19.3179	22.0557	23.3118	22.8835
66398	Commd5	-0.121646	0	0.07	0.05	0.1	0.11	0.06	0.08	0.09	0.18	0.22	0	0.28	0.84	0.26	0.22	14.9776	17.2019	13.2529	11.0938	13.3156	9.29188	10.8783	14.009	13.1884	11.5335	11.8546	11.1342	12.2644	15.6035	9.93475
66200	Commd6	-0.200899	0.63	0.23	0.21	0.58	0	0.37	0.17	0.08	0.63	0.39	0.18	0.27	0	0.11	0	19.2826	15.5923	17.2017	16.2716	10.7049	14.3469	17.7162	14.4296	14.6261	12.7109	13.831	15.7134	20.6486	21.5076	23.0244
99311	Commd7	0.250951	0.1	0.27	0.06	0	0.05	0	0.11	0	0.48	0.16	0	0.95	0.04	0	0.91	8.84127	9.20128	8.70548	6.76452	6.62556	5.61147	7.89782	7.59823	8.49798	8.27054	8.26725	7.72983	6.80695	10.3737	7.31697
27784	Commd8	0.294497	0.06	0.16	0.08	0.06	0.05	0.06	0.04	0	0	0	0.06	0	0	0	0.08	7.6387	4.37011	6.64961	6.26383	3.34251	4.91174	4.62329	4.61071	4.03359	3.93849	3.77558	4.56976	3.47204	1.65482	3.32537
76501	Commd9	0.200179	0.07	0.12	0.12	0.1	0.08	0.14	0.31	0.71	0.32	0.54	0.36	1.06	0.45	0.26	0.37	15.6142	19.6554	13.9287	13.0203	15.274	11.872	13.5035	15.541	14.8697	15.1655	20.1277	17.7923	14.8542	18.3622	16.4293
12846	Comt	0.885714	0.9	1.2	1.16	0.93	0.86	1.13	1.81	1.94	5.78	11.89	13.66	14.01	23.9	36.93	67.5	48.5316	49.6394	44.673	42.2388	43.0032	29.4979	39.3891	51.8761	61.9465	94.0893	92.0546	109.852	115.013	438.603	296.384
69156	Comtd1	0.324291	0.07	0.1	0.14	0.09	0.1	0.09	0.08	0.15	0	0.22	0	0	0	0	0.13	8.32191	14.2927	10.0171	8.38047	7.01337	4.51913	4.4074	4.4969	3.4936	2.7831	2.77882	2.01081	2.89698	4.94036	2.99822
12847	Copa	0.0928571	1.61	1.44	1.46	1.4	2.28	1.91	2.17	2.92	4.79	5.7	6.48	6.64	4.86	4.1	3.83	32.8438	33.6621	29.674	31.6659	35.7026	31.2189	30.8443	32.8541	38.9443	43.5066	30.5224	36.1824	25.484	26.5488	28.4399
70349	Copb1	0.478999	1.22	1.01	1.19	1.25	1.24	1.58	1.72	1.82	3.43	4.06	3.8	3.41	2.82	2.26	2.26	24.3146	14.6076	20.9964	20.2948	12.7877	17.0697	18.704	23.438	21.3951	25.7919	25.8155	26.2734	19.4831	11.9181	17.3277
50797	Copb2	-0.192857	1.81	1.46	1.43	1.13	1.12	1.67	2.02	2	3.81	3	4.35	3.26	3.42	2.22	1.66	48.3422	43.1008	43.8014	41.876	37.3143	36.2901	36.8583	43.7505	42.3562	45.9227	41.7535	36.2727	28.6662	23.2558	29.1021
59042	Cope	0.185714	2.04	1.17	2.2	1.37	1.15	1.84	2.23	2.73	4.87	4.36	4.89	5.54	3.03	3.07	4.1	80.7732	114.609	81.6392	77.1319	97.5488	76.4196	79.5325	77.96	88.7746	80.4264	94.5296	82.5723	87.8189	142.29	107.602
54161	Copg1	-0.579089	1.13	0.92	0.98	1.19	1.31	1.63	1.5	1.76	3.21	2.87	3.34	3.07	2.87	1.56	1.7	33.7795	32.2572	27.3579	27.6186	28.5099	26.0316	25.1944	22.4677	27.8818	26.1193	24.0397	19.6902	18.1941	20.7566	20.2657
54160	Copg2	-0.678571	0.31	0.21	0.27	0.33	0.28	0.38	0.22	0.52	0.72	0.51	1.64	1.19	0.82	0.36	1.05	19.6726	17.0027	17.2364	16.8652	12.0084	14.0465	15.1655	11.34	11.5564	10.8709	12.5697	7.16292	7.33266	4.8319	3.90093
12848	Cops2	0.121429	1.36	1.32	1.06	0.55	0.59	0.66	1.28	1.21	1.37	1.64	2.17	1.54	1.03	0.76	0.95	39.7567	13.0959	30.7647	28.1627	10.8014	23.1955	14.8798	14.3934	13.1552	13.8038	14.0706	15.2365	13.4081	4.71694	13.0392
26572	Cops3	-0.219839	0.87	0.73	0.68	0.56	0.42	0.54	0.53	0.56	0.96	0.82	1.05	0.79	1.28	0.88	0.89	40.6919	33.9217	35.9738	31.5617	20.6373	19.5044	18.656	16.2157	20.0199	14.7429	19.6675	14.4922	16.7801	13.9041	15.9127
26891	Cops4	0.00894456	2.2	1.79	1.38	1.1	1.37	1.41	1.37	1.41	2.34	2.33	2.75	1.62	1.87	1.61	1.36	41.6187	30.73	31.3105	27.0097	24.8188	19.6917	17.3037	17.6619	16.0419	20.5139	18.3743	15.2226	14.335	13.6718	10.9178
26754	Cops5	0.420018	0.95	0.92	0.66	0.48	0.64	0.78	0.59	0.82	0.94	0.69	1.14	0.56	0.91	0.78	0.45	44.8354	32.8026	38.7199	32.3464	23.4061	22.9142	19.1187	24.7672	26.1061	25.2366	25.1612	19.1518	22.0094	13.9275	15.9456
26893	Cops6	0.248882	1.77	1.1	0.85	0.89	0.95	1.06	0.77	1.06	1.46	1	1.35	1	2.16	0.55	0.55	60.6211	69.0155	52.5328	55.1782	59.6716	52.5035	66.7739	56.4098	72.1349	52.5181	58.0453	47.0406	49.562	56.4035	48.0708
26894	Cops7a	0.0821429	0.84	0.57	1	0.48	0.59	0.71	0.39	0.9	1.25	1.36	0.78	1.95	1.86	1.45	1.22	36.5436	52.1695	29.2019	22.9277	29.5596	25.8244	15.4964	25.6971	40.2765	35.7582	26.5804	25.4117	33.0078	22.814	17.73
26895	Cops7b	0.095154	0.33	0.29	0.29	0.05	0	0.35	0.09	0.29	0.4	0.54	0.37	0.62	0.12	0	0.09	13.852	15.386	10.806	11.4372	8.77907	8.74701	6.68209	5.44367	6.49104	7.10795	6.87792	5.81682	5.47564	3.93601	4.29587
108679	Cops8	-0.30563	2.26	1.56	1.93	1.47	1.16	1.93	2.65	5.34	2.28	4.89	2.58	4.65	29.48	1.9	1.27	29.2573	28.7926	22.4892	18.8141	17.6109	16.1036	11.955	13.9942	15.152	13.1768	13.5175	12.9463	10.8016	10.6574	9.1913
56447	Copz1	-0.460714	4.94	1.89	1.97	2.23	4.13	6.01	5.87	4.36	4.18	8.59	10.89	4.35	4.45	4.96	2.75	122.954	139.553	118.121	107.894	105.823	95.1945	84.3148	61.8173	78.2511	64.3634	66.1022	50.6633	76.4699	96.2803	77.6699
56358	Copz2	0.501652	0	0	0.04	0	0	0	2.3	0.51	0.25	0.34	0.2	0.24	0	0	0	12.1865	15.1744	9.41826	13.8035	19.689	20.5742	26.3264	23.0967	24.3862	25.8714	28.7295	30.3864	27.1095	23.1537	17.869
230027	Coq3	0.356633	0.06	0.07	0.05	0.05	0.06	0.08	0.08	0.21	0.35	0.43	0.79	1.01	0.78	0.94	0.78	5.25435	4.42466	3.7433	3.68934	2.72414	2.37827	2.69646	3.49982	3.46855	3.99138	3.65156	4.48899	5.26978	4.43401	5.72774
227683	Coq4	-0.123718	0	0	0	0	0	0	0	0	0	0	0	0	0.84	0	0	9.23902	10.3792	7.57131	5.22919	5.45595	5.93806	4.32188	3.22159	3.27163	3.05112	3.0325	4.12972	3.97336	4.67152	3.04711
52064	Coq5	0	0.13	0.19	0.08	0.06	0.05	0.08	0.05	0.05	0.2	0.11	0.28	0.53	0.78	0.46	0.48	17.7752	19.6641	16.0682	13.542	12.8144	12.4831	8.83545	8.78796	11.0896	10.5543	11.4648	9.55421	11.4688	13.0775	10.5303
217707	Coq6	-0.0983021	0.09	1.3	0.09	2.45	2.04	0.26	3.28	0.38	0.57	0.54	1.09	1.68	0.97	1.27	0.82	17.2876	20.7996	14.9549	13.612	13.7507	10.1332	8.13625	10.4413	10.0095	11.3509	10.9328	11.3928	8.30575	6.58105	5.09919
12850	Coq7	0.229392	0	0.39	0.28	0.22	0.23	0	0	0.81	0.97	1.75	1.5	3.12	3.83	1.89	2.28	32.9512	27.9228	25.2864	20.0125	14.0646	16.5222	15.4108	22.041	19.3831	16.3776	19.4949	20.9302	32.1473	21.4992	20.7224
67426	Coq8a	0.956211	0	0	0.07	0.04	0.08	0.14	0.18	0.21	0.4	0.97	2.2	7.86	11.04	8.1	5.95	2.01901	3.16566	3.65578	7.23974	14.7795	11.1724	9.4807	8.28036	16.3906	28.7451	30.9349	51.4084	84.5696	120.039	37.0367
76889	Coq8b	-0.292048	0	0.02	0.04	0	0	0	0.03	0.01	0.02	0	0.05	0	0.34	0	0.45	8.35681	13.4225	8.89193	10.6676	16.8196	13.2201	12.3202	14.3373	11.5897	12.1757	12.7824	16.3047	9.23564	8.80401	5.94632
67914	Coq9	0.921429	0.12	2.24	0.3	0.34	0.39	0.82	1.66	3.09	4	5.65	8.79	14.68	20.14	11.81	12.86	27.7207	33.524	27.051	28.5886	31.967	26.5364	28.5999	32.7887	38.7248	43.4033	47.7585	49.6391	57.1308	53.3729	39.0002
12721	Coro1a	0.560714	1.88	1.26	1.93	1.78	1.91	2.56	4.02	2.46	4.76	3.22	3.42	1.37	1.11	0.3	0.16	39.943	50.2184	36.316	43.2485	73.8327	51.6467	63.735	81.9703	49.6574	36.4504	25.5593	9.34446	5.96526	4.08541	3.97663
23789	Coro1b	-0.382143	1.19	1.12	1.36	1.27	1.13	1.58	2.22	1.84	3.05	3.47	4.61	3.48	3.52	2.67	1.8	34.9787	37.6606	28.3706	28.6531	34.2426	24.3564	27.3026	29.4214	28.4139	27.8161	29.446	29.7546	22.3099	25.9009	20.6189
23790	Coro1c	0.0107528	1.46	1.37	1.01	1.01	1.27	1.64	2.03	1.41	2.21	2.16	2.43	1.8	1.3	1.01	0.7	36.6098	40.0417	26.2683	24.1714	24.3658	19.8351	18.4654	18.5653	20.3095	15.3109	14.2656	10.5359	8.37129	5.56175	4.12594
78885	Coro7	-0.21269	0.27	0.44	0.59	0.41	1.05	0.5	0.57	0.62	0.82	0.88	1.12	0.88	0.77	0.56	0.69	6.95512	8.52478	2.72662	8.0519	8.01372	5.16637	7.01764	7.83138	5.28275	4.39116	5.80691	6.23728	5.89206	3.89615	2.99921
72042	Cotl1	0.1	7.04	6.1	5.97	6.92	8	8.93	11.03	11.49	16.68	19.82	19.27	12.31	5.82	2.75	2.35	66.778	83.3565	51.0479	57.3605	67.9312	46.4415	44.939	51.7888	46.0698	43.4207	37.0514	21.0691	14.761	12.5806	8.60662
226139	Cox15	0.647499	0.16	0.22	0.2	0.07	0.05	0.16	0	0	0.28	0.32	0.16	1.8	0	0.11	0.1	8.55332	7.57666	7.90435	6.79871	5.49134	5.18025	4.15343	6.28467	7.81158	8.9499	8.23844	7.08718	6.00185	4.91911	4.20437
66272	Cox16	0.061859	0	0	0	0	0	0	0	0	0	0.23	0	0	0	0	0	11.8194	6.84886	10.2777	17.408	11.0186	10.6775	7.06692	10.216	9.97963	10.8148	15.524	8.36122	10.179	11.0222	12.5773
66359	Cox20	0.0363696	0.48	0.89	1.51	2.13	0.4	0	0	0.87	0.95	1.48	1.71	0	0	0	3.53	25.1374	18.2577	26.1403	22.9685	16.1077	23.9694	21.7108	17.5125	15.9237	17.4093	18.4297	18.7159	22.0969	16.0516	21.139
12857	Cox4i1	0.05	11.36	10	11.13	13.44	10.06	19.56	23.42	34.24	74.54	65.54	74.03	106.8	111.44	140.24	95.98	396.205	621.866	397.079	371.519	443.26	417.631	450.419	491.745	376.47	300.795	369.532	461.609	530.189	590.783	376.104
12858	Cox5a	0.535714	12.27	11.4	8.25	11.5	13.35	10.49	21.73	29.76	22.78	36.84	32.42	46.01	28.09	67.56	16.22	134.904	160.671	137.242	120.778	119.25	133.293	150.858	173.639	158.15	125.711	160.413	168.663	263.213	230.785	141.354
12861	Cox6a1	0.216995	0	0	0	0	0	0	0	0	52.85	0	0	0	0	90.04	30.98	485.007	591.028	482.374	456.301	521.575	435.061	520.926	449.836	453.159	390.138	496.813	503.98	592.472	763.221	509.606
110323	Cox6b1	0.132143	23.87	17.84	13.87	17.17	20	35.55	45.2	47.6	118.05	127.4	149.03	172.02	180.81	207.55	143.73	320.104	347.187	355.59	288.59	302.413	307.43	322.301	351.89	323.106	271.337	306.74	314.387	380.135	412.881	272.763
12864	Cox6c	0.775	1.71	1.86	1.94	5.91	5.34	9.26	20.05	12.03	24.85	18.4	26.1	27.1	26.95	43.09	21.4	220.585	192.283	239.392	204.085	183.104	201.098	214.52	238.223	240.398	214.547	260.386	328.157	410.526	299.476	262.436
12866	Cox7a2	0.457143	12.51	9.99	16.47	12.4	16.2	20.49	28.25	26.44	49.58	58.62	85.85	109.53	92.99	105.27	77.17	124.558	122.744	136.539	123.176	104.434	118.887	136.278	129.118	150.373	104.83	128.102	133.52	168.254	127.879	127.383
20463	Cox7a2l	-0.061859	0	0	0	0.12	0	0	0	0	0	0	0	0	0	0	0	83.5373	80.179	78.09	67.6256	70.7166	66.492	79.2383	109.742	64.9405	66.4034	58.2478	79.1517	76.6727	59.369	47.7278
12870	Cp	0.859494	0	0	0	0.02	0	0.09	0.41	0.2	0.89	1.06	1.71	0.93	0.62	0.34	0.5	1.75688	1.01206	4.84731	16.7256	22.0102	86.9722	79.6242	146.19	151.269	240.54	172.378	293.919	241.342	107.317	345.558
56373	Cpb2	0.517935	0	0	0	0	0.02	0	0.06	0	0	0	0	0	0.04	0	0.08	22.6073	20.1666	43.6878	64.1134	77.682	143.96	205.859	122.696	136.364	118.489	121.263	81.6797	201.289	211.137	315.404
12874	Cpd	0.32217	0.02	0.03	0	0.02	0.15	0.01	0	0	0.05	0.2	0.11	0.48	0.07	0	0	8.98911	6.94581	9.95358	7.83686	6.03174	6.3062	4.26835	5.17056	6.86276	7.49897	5.55743	7.31018	4.7729	2.05317	2.27129
231207	Cpeb2	0.296068	0	0	0	0	0	0	0	0	0.03	0	0	0.01	0	0	0	0	0	1.01095	1.26061	1.1231	1.83024	2.33512	2.90441	2.36686	3.70151	3.92148	4.89619	3.67726	2.55097	4.18023
67579	Cpeb4	0.64673	0.09	0.09	0.05	0.07	0.05	0.04	0	0.02	0.03	0	0.11	0	0	0	0	28.3354	15.9479	33.9611	31.8734	19.3902	22.4884	12.2118	8.329	11.6957	6.97613	6.56053	5.42305	4.22311	3.40748	5.68468
70574	Cpm	0.83748	0.16	0.3	0.2	0.18	0.25	0.45	0.17	0	0	0	0	0	0	0	0	7.43043	6.39245	4.08547	4.35609	17.7279	16.049	6.64459	1.70005	2.33929	2.2841	1.84185	1.94729	1.70516	0	0
93721	Cpn1	0.622903	0	0	0	0	0	0	0.03	0	0	0.04	0	0	0	0.07	0	44.1535	67.6713	60.1252	95.7144	145.783	146.423	192.8	134.063	161.269	181.903	193.216	180.456	172.031	234.236	181.799
71756	Cpn2	0.801794	0	0	0	0	0	0	0	0.03	0.01	0	0	0.12	0.39	0.24	0.19	3.4913	6.36622	6.88065	9.93015	15.2553	18.2232	27.9901	34.8745	34.7515	41.5481	34.7504	35.8932	61.8118	91.5943	69.6595
266692	Cpne1	0.0642857	0.82	0.58	0.59	0.51	0.49	0.67	0.89	0.54	0.86	0.76	0.77	0.78	0.61	0.52	0.48	24.0323	19.4544	17.3224	18.3171	12.8031	12.1506	10.0426	9.54879	9.92961	10.8704	11.4317	8.56888	6.34143	4.93604	6.39052
234577	Cpne2	0.252106	0	0	0.02	0	0	0	0.03	0.02	0	0	0.11	0.18	0	0	0.05	2.91879	2.7577	1.84491	2.5545	2.28765	2.93158	2.51386	3.5392	4.24448	6.60657	5.14651	6.38927	5.08404	4.9224	5.23931
70568	Cpne3	0.593919	0.44	0.45	0.64	0.64	0.77	0.99	1	0.91	1.22	1.82	2.34	1.69	1.78	1.22	1.13	2.66257	2.45047	3.27994	4.16563	3.69763	3.75002	2.80268	3.7632	4.81568	5.25595	4.1335	4.00533	5.56889	2.36193	4.31665
12892	Cpox	0.667857	28.24	19.57	26.11	21.72	20.5	19.18	10.93	8.31	14.47	13.55	16.46	21.65	14.51	11.41	6.21	368.607	367.255	368.299	386.691	418.549	218.736	137.754	73.6782	103.714	65.0638	60.6584	42.0718	27.3902	24.8856	23.2934
223978	Cpped1	0.821429	0.25	0.12	0.22	0.28	0.26	0.44	0.51	0.77	1.23	0.93	1.62	1.67	2.32	0.88	0.81	8.89644	9.39113	8.47646	8.38932	7.90975	7.01429	8.84774	10.8749	13.3823	12.6552	13.3309	14.5805	18.7441	13.4987	11.3739
54381	Cpq	0.821429	0	0.08	0.14	0.04	0.34	0.1	0.2	1.91	1.97	1.82	4.21	5.41	4.14	5.96	5.16	2.29707	2.07962	4.76247	7.04913	7.10685	13.2683	12.3078	13.2942	19.4075	27.5935	24.1176	34.9176	27.0422	22.9314	17.4075
227231	Cps1	0.910714	0.08	0.14	1.6	2.07	6.6	26.42	99.26	390.32	772.66	522.2	928.67	1593.58	2611.89	2837.86	1947.51	1.50078	1.10419	1.73531	8.2151	34.6358	80.4294	176.463	119.051	187.083	146.037	175.793	93.9856	834.185	361.865	286.775
94230	Cpsf1	0.550202	0.24	0.26	0.13	0.07	0.07	0.08	0.06	0.07	0.17	0.07	0.07	0.06	0.08	0.01	0.02	27.8334	30.0172	21.2437	20.4972	21.8842	15.6336	14.0803	16.0192	14.0387	13.4541	11.7466	10.294	10.5786	13.7474	11.7733
51786	Cpsf2	0.675	0.5	0.37	0.27	0.32	0.24	0.25	0.19	0.16	0.58	0.17	0.08	0.04	0.52	0.02	0.03	16.2433	10.8499	14.2667	12.3128	7.40046	7.07248	5.73263	5.85072	6.07778	4.77483	4.6731	2.54979	3.34805	2.18786	3.05072
54451	Cpsf3	0.549196	0.67	0.47	0.41	0.14	0.21	0.18	0.12	0.15	0.18	0.1	0.11	0.04	0	0	0.32	26.573	27.9013	22.1103	18.9394	17.8084	12.9194	12.1802	13.8655	14.5488	14.6378	15.367	12.6786	13.1512	11.545	9.69272
54188	Cpsf4	0.54796	0	0.17	0.28	0.13	0	0.12	0	0.2	0.33	0	0	0	0	0	0	28.2327	28.2563	23.1872	22.2598	19.9209	19.0202	12.8152	13.6358	12.8535	10.337	11.0718	9.69975	10.6516	8.41088	8.6639
432508	Cpsf6	0.781754	1.11	1.63	1.41	0.79	0.81	1	0.63	0.85	1.06	0.87	0.85	0.63	0.5	0.48	0.23	18.2571	11.7749	13.357	11.1491	9.30602	9.08968	5.32813	7.19555	6.53135	5.29236	4.20595	4.54932	2.42705	1.26201	2.06965
269061	Cpsf7	0.281111	0.24	0.17	0.13	0.2	0.09	0.25	0.33	0.09	0.4	0.17	0.35	0.27	0	0	0.03	22.156	16.9307	18.1509	17.9105	14.6286	15.1913	11.5213	13.7912	11.6623	10.6596	11.3408	12.5649	9.09679	3.52187	6.54076
12894	Cpt1a	0.892479	0	0	0.03	0	0.07	0.16	0.35	2.79	7.36	9.11	15.87	17.12	6.62	4.95	4.46	5.62283	5.14224	5.26244	4.05218	5.20476	8.10537	23.2295	129.21	64.2532	122.984	95.3693	175.612	49.0966	30.8494	38.7195
12895	Cpt1b	-0.159466	0	0	0	0	0	0	0.01	0.17	0.55	0.62	0.74	0	0	0	0	2.08013	1.94844	2.3977	1.98722	2.71737	4.23924	5.76609	5.80655	1.45014	1.57598	1.62018	4.33242	1.58254	0	1.71696
12896	Cpt2	0.732143	0.86	0.63	2.28	1.81	1.6	2.68	3.51	3.53	9.27	11.55	17.11	17.02	16.44	15.89	11.74	19.0387	23.6466	20.7587	20.8825	22.7983	16.4325	18.9906	44.7859	39.1382	51.7676	67.7968	41.3284	39.7565	60.0704	39.2882
12946	Cr1l	-0.160858	0.05	0.11	0.25	0.07	0.15	0.88	0.59	0.19	0.28	0.38	2.59	0.46	0.16	0.28	0.33	23.2635	21.8844	27.4436	29.46	22.2325	22.2725	19.7935	18.8113	22.1704	24.6369	22.9083	20.9083	19.7819	15.9465	14.889
12903	Crabp1	0.731925	0.26	0.07	0	0	0	0	0	0	0	0	0	0	0	0	0	3.22761	0	0	0	0	0	0	0	0	0	0	0	0	0	0
12905	Cradd	0.647959	0.02	0	0.02	0	0	0	0	0	0.06	0.08	0.1	0.13	0.16	0.07	0.12	2.27335	2.27091	1.95768	2.32738	2.11223	2.24674	3.03918	3.41227	2.10954	3.56204	4.26457	4.73739	5.29645	5.50592	4.80094
12908	Crat	0.0125112	0.03	0.04	0.06	0.05	0.1	0.04	0.17	0.21	0.55	1.29	1.37	1.11	0.22	0.34	0.54	11.5762	17.1537	15.3127	14.9561	17.4164	12.9336	16.4909	21.1624	14.2361	16.7303	14.904	20.8821	9.41671	5.42431	8.59108
58799	Crbn	-0.0241473	0	0	0	0.05	0.01	0	0	0	0	0	0	0	0	0	0	7.54003	3.95195	7.38157	6.59886	4.28978	5.44877	5.32751	6.81319	4.73209	5.5981	4.59821	7.33431	6.39445	3.03522	3.8997
12912	Creb1	0.550672	0.29	0.28	0.31	0	0	0.21	0.13	0.14	0	0	0.13	0.15	0	0	0	5.52829	2.43859	4.58393	4.36885	2.26172	3.34328	2.23267	1.90865	2.21237	1.90912	1.71746	1.42633	1.15899	0	0
12914	Crebbp	0.447237	0	0.02	0.01	0.01	0.01	0	0	0	0	0	0	0	0	0	0	3.56028	3.21235	3.45818	3.43754	2.92291	3.72908	2.94702	2.7385	2.20208	2.30987	2.10367	2.23754	1.53332	1.27145	1.4624
433375	Creg1	0.145293	0.79	0.79	0.83	0.55	0.7	0.79	0.83	1.28	1.05	0.68	1.43	0.65	1.12	1.64	2.7	85.8034	82.4544	94.774	91.9565	80.1953	82.781	66.9784	56.6867	59.7961	50.5675	60.9581	44.3197	114.134	103.505	78.0663
171508	Creld1	0.738183	0	0	0	0	0	0	0	0.05	0.05	0.17	0.12	0.12	0.08	0.08	0.29	6.68123	7.73947	4.16174	3.76955	6.57706	5.50305	11.3559	11.7521	9.97664	10.0984	10.1411	17.8082	18.7378	29.6183	26.3391
76737	Creld2	0	0.32	0.55	0.35	0.28	0.45	0.45	0.85	0.57	0.93	0.62	0.97	0.74	1.09	1.22	1.8	39.8512	34.4533	30.2065	29.0825	22.3609	26.6071	21.7423	28.6102	30.445	21.5905	25.3105	12.3081	19	41.8152	88.3074
12925	Crip1	0.349745	0	0	0	0	0	0	0.48	0.83	0	0	0	0.73	0	0	0	25.1712	26.2481	26.9562	24.8201	29.3971	30.6955	39.174	46.0557	38.5235	28.946	27.1785	17.8694	10.2588	6.65845	2.86832
68337	Crip2	0.821429	0.16	0.25	0.23	0	0.19	0.44	0.14	0.66	1.05	1.38	1.72	2.05	1.59	1.04	0.89	32.9442	38.9519	25.8069	27.4992	29.3818	25.098	27.952	40.5431	45.1922	52.7953	64.057	61.5935	73.1469	69.9236	45.5299
12928	Crk	-0.248436	0.39	0.49	0.45	0.49	0.32	0.71	0.5	0.52	2.23	1.01	1.98	1.52	1.5	13.5	1.02	25.3168	13.7211	20.3579	20.0561	12.3322	16.0995	14.6515	15.6467	17.4265	19.3336	16.9377	19.3731	13.8149	6.663	11.0719
12929	Crkl	0.351257	0.98	0.96	1.16	0.79	1.17	0.96	0.92	0.91	1.45	2.12	2.3	0.88	0.96	0.6	0.68	11.1519	10.5392	10.7552	12.6949	8.62161	7.95697	5.46014	8.02194	8.23031	8.28643	6.54025	5.79569	3.8628	4.6899	4.29921
54394	Crlf3	0.891677	1.03	0.88	0.88	0.82	0.54	0.41	0.5	0.32	0.32	0.23	0.3	0.14	0	0.08	0	43.4189	37.5917	51.578	52.3622	47.8416	44.4441	21.6582	16.4986	14.4111	8.44496	7.88345	4.25657	3.16606	1.65163	2.25391
12933	Crmp1	0.731925	0.12	0.06	0	0	0	0	0	0	0	0	0	0	0	0	0	1.84746	0	0	0	0	0	0	0	0	0	0	0	0	0	0
66877	Crnkl1	0.382143	1.34	1.48	1.62	1.66	1.24	2.48	0.78	0.24	1.01	2.27	0.38	2.36	0.6	0	0.25	14.9346	9.66949	11.4095	13.0772	6.07248	8.08572	6.28525	6.13012	4.88235	4.30435	4.6293	2.66039	2.88556	2.35041	3.69657
74114	Crot	0.917857	0.07	0.16	0.4	0.26	0.33	0.36	0.18	1.79	5.22	8.75	11.49	15.97	5.86	4.61	3.35	11.7306	8.35454	17.1257	21.0225	13.3564	20.9781	14.4175	132.791	93.6101	170.897	182.735	241.256	112.168	53.1128	109.432
56693	Crtap	0.39894	0.08	0.07	0.06	0.06	0.07	0.14	0.18	0.22	0	0.09	0.1	0.04	0	0	0	12.8717	17.1229	11.1862	11.2214	12.84	10.0111	11.2742	11.3492	13.6146	13.4481	11.7182	9.28889	5.72536	3.43208	2.2756
74343	Crtc2	-0.123718	0	0	0	0.02	0	0	0	0	0	0	0	0	0	0	0	13.4393	12.5762	9.97202	10.2962	10.3179	10.1299	11.3971	18.4634	9.29199	10.0341	9.77118	12.1563	15.3757	11.3975	10.6054
68631	Cryl1	-0.432799	0	0	0	0.04	0	0.1	0.03	0	0.22	0.45	0.37	0.21	0.66	1.22	1.3	5.17126	6.21021	5.47045	4.80477	6.01185	4.31319	3.03832	6.06848	4.29474	4.35083	3.26604	3.54184	3.05773	11.1736	3.83604
12972	Cryz	0.814286	1.09	0.54	0.96	1.11	1.46	2.5	3.16	3.42	5.51	8.58	11.23	13.57	15.84	14.48	14.26	8.89822	10.807	9.58194	10.7212	15.1611	12.394	10.2409	16.425	20.2359	23.1355	22.9034	29.8375	18.7578	23.3519	16.6585
66609	Cryzl1	0.457552	1.64	0.5	0.59	0.73	1.04	1.06	0.99	1.48	1.07	1.61	0.76	0.69	0	0	0.52	9.09354	6.42078	10.7148	8.53979	6.75645	6.94718	7.10571	6.90112	6.79659	6.54912	5.88837	6.96952	5.64345	3.17988	3.30874
226527	Cryzl2	0.927426	0	0	0	0	0	0.05	0.08	0.04	0.22	0.46	0.79	0.84	0.37	0.35	0.34	5.83483	5.70643	5.57534	7.25496	7.05488	7.79613	10.1598	8.99815	13.1189	16.7062	16.2627	17.4432	12.2613	12.8754	7.90433
12974	Cs	-0.367857	9.32	5.76	5.96	5.03	5.09	4.68	5.2	5.02	8.52	10.21	7.11	10.27	18.68	17.47	18.12	105.404	129.401	98.9077	73.6267	67.6205	49.048	37.9373	28.7558	37.0404	28.0542	32.088	19.1661	35.3767	41.1595	29.9987
246277	Csad	0.746429	0	0.18	0.35	0.43	0.94	2.54	6.56	10.92	17.91	26.41	27.35	18.37	9.28	22.38	44.42	10.0381	13.4461	17.1528	25.1756	33.8464	56.3122	154.724	108.138	77.4359	63.2001	79.3662	73.2192	33.4918	86.6364	95.8686
229663	Csde1	0.289286	3.28	2.95	1.69	1.49	1.68	1.47	0.75	1.56	2.3	2.55	3.15	2.45	2.6	0.84	2.1	59.2123	24.0762	49.0117	45.9261	22.1273	35.1727	29.2019	31.3755	33.3479	33.4723	34.0372	33.3851	32.7912	14.441	27.9768
110750	Cse1l	0.682143	6.51	2.53	2.2	1.73	2.66	1.84	2.47	2.36	1.77	2.32	1.34	1.24	1.53	1.05	0.72	40.0739	17.2582	28.1428	24.0957	10.3903	12.2867	8.71972	8.47206	11.8609	9.16946	6.39244	4.56674	7.26834	3.71353	4.90936
12978	Csf1r	0.540889	0	0.01	0.06	0.03	0.02	0.04	0	0.05	0.06	0.66	0.12	0	0	0	0	10.5005	14.7552	12.9019	16.2829	28.5902	25.2776	29.6175	30.7053	30.185	34.2106	24.9069	15.2287	14.3123	17.1661	9.22545
12988	Csk	-0.439286	0.58	0.48	0.32	0.34	0.25	0.22	0.31	0.37	0.62	0.8	0.49	0.53	0.89	0.33	0.93	44.9227	61.0656	37.4798	35.3995	36.0846	24.8841	25.6268	25.3052	27.4471	24.4032	23.4817	16.873	17.3686	28.5569	20.4693
93687	Csnk1a1	-0.112701	0.24	0.17	0.26	0.19	0.18	0.14	0.13	0.16	0.25	0.17	0.43	0.36	0.33	0.16	0.23	65.33	48.8936	34.0762	50.4607	37.0023	40.7583	27.4189	36.7309	33.5056	32.8116	31.1147	27.9185	26.117	13.4971	15.058
104318	Csnk1d	0.143991	0.71	0.1	0.07	0	0	0	0.08	0.09	0	0.03	0	0.04	0.12	0	0.12	37.2172	37.1538	30.3602	27.2338	29.0653	24.4121	24.5058	26.103	21.2062	21.9992	19.6633	18.4282	17.7381	15.322	11.8307
12995	Csnk2a1	0.478999	1.88	1.98	1.44	1.08	1.19	0.94	0.83	0.78	0.94	1.53	1.36	1.34	1.07	0.77	0.81	33.3635	22.7921	27.3962	24.7022	17.4955	19.1746	17.6231	17.4722	17.4013	15.9198	17.2184	16.5375	14.6113	11.4426	12.7679
13000	Csnk2a2	-0.312779	0.38	0.73	0.25	0.16	0.32	0.19	0.83	0.19	0.26	0.59	0.87	1.18	0.3	0.28	0.51	10.501	10.1788	8.14984	6.92439	6.21089	5.58952	4.3461	6.20343	4.74265	3.91552	3.84522	3.7962	3.55276	3.53514	3.11724
13001	Csnk2b	0.0464286	3.07	2.44	2.24	2.12	1.86	1.49	2.03	1.45	2.29	2.32	2.66	2.9	2.98	1.14	2.07	88.4489	117.997	82.0921	86.1822	64.0985	60.4041	54.2976	57.0172	50.4754	51.2775	58.9852	29.4824	67.3542	86.3971	47.7367
13007	Csrp1	0.385714	2.16	1.69	1.82	1.42	1.28	2.14	1.53	2.01	1.59	1.94	2.73	1.68	0.97	0.49	0.61	54.2645	64.2695	42.4961	41.3123	45.3272	28.5884	27.9956	34.4903	35.0593	25.9371	17.8603	16.821	13.5302	6.89731	4.03907
13008	Csrp2	0.439678	0.33	0.1	0.18	0.06	0.05	0.09	0.2	0.36	0.41	0.66	0.4	0.57	0.35	0	0.2	14.1079	11.3431	8.54722	8.91838	10.5887	9.91699	13.9514	12.7326	20.2159	20.0049	24.8186	23.0905	29.0677	25.2344	21.8507
13009	Csrp3	0.488504	0	0	0	0	0	0	0	0	0	0	0	0	0	0	1.06	0	0	0	0	0	0	0	0	0	1.10647	1.08005	3.03937	10.7534	16.8682	19.8747
13010	Cst3	0.459283	0	0.12	0	0	0	0.09	0.3	0.13	0.24	0.25	0.31	0.19	0	0	0	54.1607	70.9845	62.062	69.0771	86.661	83.6485	98.9009	113.936	114.827	111.007	110.505	101.696	95.7869	139.208	108.205
76770	Csta2	0.880238	0	0	11.43	12.46	32.41	48.76	52.4	11.23	24.06	13.1	14.84	0	0	0	0	1.57476	1.7087	2.86322	6.98233	24.0137	77.5352	89.7072	66.2217	34.4562	34.3682	23.6484	0	0	0	0
408196	Csta3	0.456435	0	0	0	0	0	0	19	0	0	0	0	0	0	0	0	0	0	1.12435	0	3.51738	7.49617	8.69698	2.93907	3.17376	4.86577	3.30032	0	0	0	0
13014	Cstb	0.714286	1.72	2.27	3.93	3.18	3.88	5.79	7.85	7.67	13.69	10.4	14.56	14.75	12.15	7.03	8.49	42.7408	38.4132	49.7633	53.2901	43.7668	53.5848	54.7692	65.8165	69.5355	59.7179	66.36	77.3156	56.6425	38.2193	32.3034
433016	Cstdc4	0.925564	2.79	3.83	44	40.69	66.5	147.52	136.66	64.31	89.26	41.62	61.43	2.88	0	0	0	25.6645	17.2588	46.6995	118.72	239.424	489.831	411.167	339.853	155.441	172.966	116.423	4.69147	0	0	1.32572
100034684	Cstdc5	0.283984	0	0	0	32.73	0	0	0	53.45	0	0	0	0	0	0	0	20.2047	17.7495	53.002	111.208	215.058	262.66	285.83	250.3	129.44	144.455	90.2512	4.43372	1.0802	0	0
67337	Cstf1	0.209115	0.75	0.39	0.26	0.32	0.16	0.2	0.33	0.23	0.39	0.12	0.3	0.65	0.17	0.43	0.21	17.0174	19.2178	14.8723	13.8882	13.3503	10.1558	9.25423	9.90231	9.63001	8.77298	9.08767	8.50834	6.71135	6.96015	5.64111
108062	Cstf2	0.87757	0.99	0.64	0.43	0.44	0.45	0.36	0.41	0.35	0.42	0.52	0.24	0.21	0.35	0.1	0	12.8133	11.5621	11.3172	11.179	7.15934	6.32139	4.52881	3.39294	5.00054	4.15296	3.87275	2.00888	2.55406	1.15092	2.03844
83410	Cstf2t	0.737396	0.14	0.16	0.15	0.13	0.14	0.11	0.11	0.11	0.06	0.05	0	0	0.06	0	0	8.67727	6.55274	8.74468	7.98698	5.90339	6.51813	5.19937	7.13464	5.97739	5.98591	5.80769	5.6883	5.24463	3.76648	4.34693
228410	Cstf3	0.715565	1.23	0.29	0.25	0.22	0.43	0.15	0.37	0.12	0.37	0.11	0.21	0.19	0.08	0.09	0.19	12.7603	9.71428	9.88999	10.4794	6.77507	6.90811	6.97017	5.94056	6.59389	5.48554	6.38449	4.95711	5.04998	2.36832	3.48463
13016	Ctbp1	0.0645165	1.03	0.9	0.74	0.63	0.55	0.41	0.67	0.49	0.63	0.63	0.57	1.09	0.66	0.38	2.59	134.847	168.252	130.364	127.157	126.515	87.0237	58.7645	51.3622	50.9705	32.2545	31.9499	20.3887	21.9259	19.7926	16.3954
13017	Ctbp2	0.725205	0.44	0.34	0.26	0.09	0.15	0.06	0.1	0.04	0.1	0.17	0.21	0	0	0	0	9.23931	6.68077	5.46557	3.40094	3.24054	3.02515	2.06467	3.66458	1.3794	0	3.58866	1.18235	0	0	0
74245	Ctbs	0.696071	0	0.05	0	0	0	0	0	0.19	0.25	0.13	0.3	0.38	0.13	0	0	1.98968	1.57156	2.17992	2.66355	2.39092	2.48142	3.18447	5.00142	4.33581	5.12557	4.09548	5.0089	2.7517	1.8038	1.97888
68964	Ctc1	0.523003	0.02	0	0.01	0.02	0.01	0.01	0.01	0	0.01	0	0	0	0	0	0	13.7777	14.0001	14.114	10.4613	10.6226	6.6006	5.2544	4.76988	4.47346	4.82531	5.34819	5.82008	3.22105	1.38386	0
13018	Ctcf	0.924609	0.31	0.15	0.13	0.16	0.14	0.12	0.08	0.05	0.02	0.02	0.05	0.03	0	0	0	30.0943	21.968	27.191	27.9994	20.7455	15.0031	13.4353	10.3567	14.9994	9.92111	7.50213	6.07645	4.01035	4.7001	3.4229
67655	Ctdp1	0.896183	0.17	0.31	0.11	0.07	0.08	0.05	0.05	0.07	0.12	0	0	0	0	0	0	12.3523	15.5619	10.3573	8.95949	7.73692	5.50192	4.00558	4.88944	4.7315	3.64716	3.12578	2.76445	1.95851	2.73245	2.30292
227292	Ctdsp1	0.061859	0	0	0	0	0	0	0	0	0	0	0	0	0.18	0	0	40.2936	56.7719	44.7638	46.3441	57.9433	42.4881	34.7135	35.1661	39.644	45.9385	42.9505	42.8472	42.9645	52.003	36.869
329506	Ctdspl2	0.158505	0	0.05	0	0	0.06	0.05	0.03	0	0	0	0	0	0	0	0	5.04289	2.45751	2.11474	3.12786	1.4238	2.89697	1.73621	2.2242	2.39467	2.25742	1.56032	1.21806	1.30032	0	0
107869	Cth	0.878571	0.27	0.44	1.32	1.86	2.71	7.9	9.14	14.83	30.65	25.28	24.7	35.66	47.55	94.79	37.24	11.148	10.1871	13.3463	21.8831	33.2284	49.5716	43.0428	51.2152	76.7664	58.1674	87.6266	28.1707	293.056	118.66	90.1736
269037	Ctif	0.692293	0	0	0	0	0	0	0	0.09	0.21	0.04	0.1	0.03	0.03	0.03	0.08	1.36521	1.07355	0	0	1.53518	1.11611	1.35753	3.42605	2.48317	3.39765	2.30702	4.4386	2.66262	3.64076	3.51502
12385	Ctnna1	0.0285714	0.84	0.67	1.05	0.85	0.93	1.57	1.61	2.43	2.95	3.58	4.25	5.16	3.14	1.95	1.68	36.6588	32.9952	32.3069	34.3307	28.6948	28.3015	29.9641	32.4578	35.094	34.6911	32.312	33.2764	30.3645	25.3757	21.9196
12387	Ctnnb1	-0.664286	0.39	0.47	0.68	0.54	0.71	1.02	1.04	1.51	2.29	2.73	3.23	3.15	2.63	1.5	1.42	90.7847	71.3574	84.6261	72.2014	60.485	58.6216	55.2581	39.2405	59.0105	58.1672	54.9819	58.2651	49.2771	37.2073	40.9361
66642	Ctnnbl1	0.489723	0.92	0.43	0.53	0.41	0.65	0.33	0.28	0.53	0.83	0.24	0.59	0.52	0.25	0.08	0.19	21.1668	22.8226	17.4425	13.1077	15.9106	12.474	18.8188	11.1324	10.6888	9.76597	9.22336	7.43815	6.19229	6.94235	5.19839
12388	Ctnnd1	-0.0107143	0.76	1.04	1.05	1.03	1.08	1.36	1.6	1.75	2.63	3.12	3.65	3.77	2.97	2.22	1.83	18.23	17.1943	17.6707	18.827	18.5765	16.7294	16.7513	17.9209	18.3162	25.3543	18.0881	18.4503	14.4947	15.3428	10.0159
51797	Ctps	0.815014	1.83	1.54	0.97	1.17	0.84	1.17	0.69	1.07	1.46	1.08	0.36	0.15	0.26	0.63	0.24	31.3781	27.812	22.0911	18.2953	12.5884	9.25642	6.40289	7.86871	7.31996	4.3	4.88055	0	2.78499	1.62139	1.03472
55936	Ctps2	0.546429	0.3	0.62	0.46	0.72	0.57	1.02	1.01	0.76	0.61	0.87	1.44	0.81	0.33	0.22	0.02	6.50551	5.87917	5.80435	6.31435	4.16426	6.15055	5.01937	6.96485	5.43905	3.69203	7.54692	8.67136	2.89463	1.01762	1.22014
22083	Ctr9	0.922945	0.15	0.22	0.2	0.12	0.12	0.1	0.05	0.04	0.07	0.05	0.04	0.09	0.03	0	0	15.686	12.5033	14.1903	11.2387	9.34262	9.03123	7.09253	6.56032	7.68858	8.03068	6.89012	5.88386	5.15338	3.96206	3.91405
66473	Ctrb1	-0.0714286	0	0	0	0	0	8.69	0	0	0	0	0	0	0	0	0	0	0	0	0	0	0	0	5.23381	0	0	0	0	0	0	0
19025	Ctsa	0.75	1.23	0.62	0.96	1.07	1.14	1.5	1.91	2.18	4.83	4.07	7.14	4.37	1.56	1.83	2.63	29.401	31.1541	31.8934	37.2858	46.5126	40.9832	41.557	53.9582	48.8705	51.4707	51.1672	55.0383	43.1626	57.6431	47.8317
13030	Ctsb	0.025	6.57	4.64	6.97	8.53	8.65	10.77	10.6	13.94	20.72	16.22	21.51	21.19	16.52	10.95	7.65	144.783	189.314	190.718	206.756	242.613	197.124	169.992	154.494	182.922	205.025	205.249	162.17	126.33	171.733	106.175
13032	Ctsc	0.536193	0.4	0.36	0.61	0.64	0.65	0.61	0.66	1.29	1.61	2.89	4.38	1.75	1.35	1.09	1	10.9645	12.8427	17.0949	18.5345	13.8853	12.652	16.3741	20.7943	25.2811	30.8275	21.9005	13.2186	9.58326	16.0435	21.4416
13033	Ctsd	-0.267857	2.8	3.06	4.25	5.05	5.38	7.03	7.66	9.34	19.49	21.5	24.12	14.59	10.06	11.3	7.53	148.241	205.118	169.629	164.774	232.615	152.939	210.83	181.905	162.875	168.279	145.555	122.533	136.377	195.126	110.612
56464	Ctsf	-0.0383202	0	0	0	0	0	0	0	0	0.05	0.19	0.31	0.19	0	0.21	0.27	6.35346	10.8514	9.69804	9.63276	12.0009	9.78791	11.3039	21.1466	13.8205	11.5368	8.02473	15.2875	17.5659	19.2385	9.02187
13035	Ctsg	0.802077	0	0	0.41	0.42	0.68	0.53	0.89	0.98	0.8	0.47	0.31	0	0	0	0	3.49371	12.705	24.0692	30.7741	41.19	23.1922	27.761	24.6346	14.68	8.74037	4.93353	0	0	0	0
13036	Ctsh	0.862255	0	0	0.27	0.21	0.31	0.56	0.71	1.25	2.66	2	3.3	2.83	1.92	2.55	2	7.08443	12.9534	20.8198	29.7254	41.1928	59.9232	67.8908	70.8816	110.957	129.285	69.0113	149.413	125.071	133.487	101
13038	Ctsk	0.795636	0	0	0	0	0	0	0	0.66	0.39	3.26	1.19	0.57	0	0	0	1.09312	0	0	1.26815	0	1.05285	0	1.52806	1.96556	1.41965	1.43282	1.55956	0	0	0
13039	Ctsl	0.813625	0	0.05	0.07	0.06	0	0.71	0.57	3.79	1.48	0.84	0.83	0.74	0.27	0	0.14	54.5411	44.4484	73.7472	98.4546	90.5859	152.017	225.072	480.16	372.154	311.211	353.545	354.288	362.982	200.576	250.532
13040	Ctss	0.568105	0	0	0	0.05	0	0	0.12	0.22	0	0.34	0.8	0	0	0.1	0	9.27534	5.51786	14.2109	19.7024	16.5872	28.0053	40.2631	54.4963	39.485	41.6233	36.4929	28.7089	25.4012	15.7223	22.7005
64138	Ctsz	0.795353	1.06	0.9	1.06	1.25	1.22	1.58	2.16	3.49	5.28	6.56	12.11	6.34	4.2	5.29	4.07	72.9967	85.2522	72.4238	77.3278	83.9961	76.7382	99.1458	122.076	155.471	135.394	148.098	147.477	139.849	191.632	161.901
13043	Cttn	-0.560714	0.88	0.73	0.89	0.78	0.58	0.91	1.2	1.13	1.43	1.92	2.69	2.26	1.59	1.86	1.6	28.0071	25.7805	20.8792	20.1287	19.0988	15.8262	16.9072	19.5067	17.9576	19.7429	17.0989	17.5493	11.6623	13.5377	13.4898
80281	Cttnbp2nl	0.123829	0	0	0	0	0	0	0	0.01	0	0	0	0	0	0	0	1.58361	1.03041	1.25226	1.51734	1.17798	1.59956	1.3598	1.51691	1.80199	2.01253	1.48997	1.25727	1.06286	0	0
233189	Ctu1	0.316261	0.59	0.1	0	0	0	0	0	0	0.12	0.08	0	0	0	0	0	5.72208	7.32944	3.8323	4.39395	4.23869	3.04236	3.38502	4.06943	2.68504	2.59524	2.26062	1.97913	2.02257	3.01407	2.23906
66965	Ctu2	0.28241	0.06	0.04	0.04	0.02	0.02	0.03	0.02	0	0.04	0	0.06	0	0.05	0	0	14.7074	14.4033	10.3524	10.9289	10.5573	8.51697	8.59016	8.57433	5.45038	5.0755	5.37341	5.52588	5.50581	5.93301	3.7949
67116	Cuedc2	0.834027	0.28	0.2	0.08	0.11	0.21	0.06	0	0	0	0	0	0	0	0	0	40.0105	52.2559	41.9745	36.7684	36.0863	29.1253	26.0535	22.574	18.5848	14.5123	15.5629	13.8391	14.3926	9.95456	6.44671
26965	Cul1	0.426143	0.56	0.29	0.27	0.28	0.39	0.35	0.26	0.35	0.47	0.39	0.36	0.54	0.33	0.29	0.44	50.7019	19.9257	24.9807	35.3791	19.2219	20.5324	15.8718	21.5274	26.3597	26.242	24.7814	26.2674	17.9034	13.4258	17.2968
71745	Cul2	-0.0304115	0.42	0.84	0.21	0.2	0.25	0.25	0.76	0.27	1.21	0.35	0.9	0.4	0.37	0.35	0.46	10.6703	5.43666	8.44849	9.12298	4.35922	5.44109	5.22074	4.40501	6.33019	7.09703	5.96893	3.6055	4.73234	4.79141	6.9657
26554	Cul3	-0.198747	0.28	0.23	0.24	0.19	0.2	0.2	0.22	0.36	0.45	0.23	0.54	0.92	0.27	0.28	0.72	20.1152	8.68714	18.0063	17.3397	8.11706	12.502	8.89842	11.0644	10.3775	10.9793	10.1236	9.3748	9.63443	3.38412	7.71729
99375	Cul4a	-0.0357143	0.4	0.73	0.76	0.55	0.63	0.43	0.24	0.35	0.33	0.81	1.09	0.64	0.94	0.36	0.74	35.7256	38.8997	39.7838	35.247	28.1684	25.4701	23.5214	26.5067	23.8023	22.2552	25.0068	19.0656	17.8661	13.5467	13.5639
72584	Cul4b	0.325874	0.48	0.34	0.35	0.27	0.25	0.2	0.1	0.17	0.23	0.34	0.3	0.27	0.68	0.23	0.36	12.1662	4.09269	7.5509	6.29723	2.67193	3.50573	2.80295	3.81817	3.25645	3.03812	3.04551	3.51496	3.13424	1.33528	3.05608
75717	Cul5	-0.267027	0.24	0.26	0.19	0.16	0.27	0.21	0.25	0.25	0.3	0.54	0.38	0.26	0.46	0.54	0.19	7.15359	2.36588	6.11658	5.56429	1.44916	2.66672	2.25997	3.36635	3.1677	3.54665	3.18673	2.72631	3.02629	0	1.84185
66515	Cul7	0.828951	0.1	0.04	0.03	0.02	0.03	0.03	0	0	0.01	0.03	0	0	0	0	0	18.754	20.5806	12.256	9.65471	11.9396	8.5059	7.72925	9.27837	7.24283	8.35745	6.58502	6.75816	2.70599	1.27983	1.07549
67675	Cuta	0.3183	0	0.51	0.26	0.78	0	0	0.69	0	0.92	0	0	0	0	0.98	0	65.8704	87.4908	57.7482	56.9514	58.4973	49.2786	47.329	43.8619	44.0433	37.0746	41.5493	41.3687	58.0238	80.526	51.8579
66388	Cutc	0.580948	0	0	0.08	0.06	0	0	0	0	0.16	0.22	0.46	0.56	0.82	0.42	0.53	8.21452	5.04685	7.22468	6.58232	4.53321	5.01783	4.08223	8.33391	7.05458	8.1498	9.45121	11.6065	9.61974	5.17897	6.04952
13047	Cux1	0.590719	0.02	0	0.01	0	0.01	0	0.02	0	0	0	0	0	0	0	0	11.6897	10.7999	9.09956	8.03796	7.46265	4.69572	6.72265	5.62708	3.67215	5.07503	3.20361	2.29169	3.1105	6.40854	4.69169
66070	Cwc15	0.37479	0.89	0.61	0.6	0.58	0.51	0.15	0.45	0.37	0.7	0	0.13	0.41	0	0	0	57.6907	51.7003	55.7392	48.4048	37.1171	35.6852	33.718	41.2462	33.8071	34.9683	34.8083	37.8384	44.623	35.1313	37.2284
80744	Cwc22	0.735867	0.14	0.16	0.1	0.12	0.11	0.04	0.05	0	0.01	0.07	0	0	0	0	0	10.3255	4.17288	7.62365	8.04385	2.40524	4.35394	3.65098	1.61774	2.37022	3.72894	2.32298	2.86745	2.50204	1.13187	2.43003
67480	Cwc25	0.309295	0	0	0.14	0	0	0	0	0	0	0	0	0	0	0	0	6.47796	6.71259	5.91646	5.26314	5.11462	4.5118	3.9805	4.80653	4.44889	3.9643	4.10768	3.62358	2.59473	2.90263	3.05078
67285	Cwc27	0.391083	0.08	0.03	0.04	0.03	0.03	0	0	0	0	0	0	0	0	0	0	8.86615	3.0342	5.98486	5.25412	2.21582	3.6127	3.59875	4.16623	3.06848	3.37526	3.92726	3.4747	3.38033	0	1.60361
72502	Cwf19l1	-0.11828	0.1	0.2	0.14	0.07	0.09	0.11	0.08	0.11	0.19	0.29	0.45	0.21	0.11	0.06	0.03	5.96639	4.95808	4.36058	4.52246	4.1479	2.91817	3.52392	3.50065	3.46997	3.20278	3.11481	2.96377	3.75328	3.36323	2.55477
13052	Cxadr	0.477212	0.13	0.2	0.54	0.31	0.74	0.66	0.41	0.88	0.29	0.62	1.13	0.88	1.36	0.59	1.1	6.2331	5.46738	7.83343	11.9206	11.5376	12.9508	12.6362	10.7074	18.189	20.2473	17.4664	16.9943	13.7613	9.90559	13.5166
74322	Cxxc1	0.816661	0.09	0.05	0.03	0.05	0.02	0.03	0	0.01	0.04	0	0	0	0	0	0	33.7995	36.7618	28.857	25.6391	24.8906	19.2897	15.9785	17.2618	16.4895	15.2898	15.2717	13.4785	15.6696	16.3664	20.0354
109672	Cyb5a	0.860714	5.19	8.33	20.46	17.92	23.08	42.46	62.79	78.78	210.5	272.1	362.49	482.36	407.34	284.59	241.83	99.1646	99.6546	37.5136	56.3502	128.205	167.816	195.677	33.2781	331.611	366.491	418.029	499.871	608.481	399.593	309.364
66427	Cyb5b	0.792857	2.06	1.33	1.47	1.02	1.43	1.75	2.78	3.03	4.44	5.34	7.07	7.42	13.94	22.76	15.56	25.4772	20.7148	20.4851	17.3087	13.0271	14.7023	17.8063	17.1461	24.3703	25.9429	26.0635	21.4478	71.4119	73.8492	66.9612
72017	Cyb5r1	0.292338	0	0.1	0.03	0.06	0.07	0.06	0	0.16	0.08	0	0	0.08	0	0	0	13.635	10.1787	9.33699	10.5349	8.39895	8.23635	7.4096	5.32883	5.69557	4.07657	4.76246	3.29369	3.73982	3.05671	3.082
109754	Cyb5r3	0.535714	4.74	5.23	6.75	5.8	7.1	12.29	18.66	13.02	22.2	27.78	28.76	30.85	40.62	45.31	40.95	91.5353	108.307	104.434	97.746	111.27	92.54	83.4038	79.9808	102.738	102	107.44	107.608	166.314	290.545	153.786
13058	Cybb	0.713532	0	0	0.04	0.04	0.08	0.19	0.33	0.08	0.37	0.16	0.28	0.06	0.07	0	0.08	1.05561	0	2.71444	4.99526	5.90738	7.67334	7.43095	9.77907	8.56384	9.76952	5.6436	2.63709	1.75112	1.13129	0
217370	Cybc1	-0.310134	0	0.1	0.16	0	0	0	0	0.18	0.21	0.15	0.34	0.18	0.12	0	0.07	18.1194	13.6034	13.6834	14.7401	11.668	12.4983	11.4268	10.3482	9.38772	6.82143	6.88092	5.34852	3.7286	3.43754	3.75709
66445	Cyc1	0.0107143	3.03	2.78	2.63	2.56	3.53	3.49	5.53	8.14	12.79	17.35	20.54	28.18	22.61	17.57	20.91	155.357	217.463	142.99	131.137	146.33	113.789	113.951	125.312	141.468	112.923	148.419	134.858	199.532	222.27	123.905
13063	Cycs	0.0464286	18.95	12.82	14.04	7.93	9.78	12.95	27.15	29.3	55.73	53.33	69.85	77.96	112.42	93.31	107.67	43.6358	38.8724	37.3373	32.0892	21.5919	26.0175	23.1431	28.0508	30.9908	22.7317	35.8015	22.8997	47.4853	26.068	27.5734
20430	Cyfip1	0.427167	0.21	0.12	0.14	0.1	0.18	0.13	0.15	0.23	0.37	0.4	0.27	0.29	0.17	0.13	0.16	7.22618	4.81367	6.39735	5.31899	5.3655	4.46193	4.6751	5.03068	6.56611	7.95425	5.3389	3.66646	4.91209	4.18864	4.61656
76884	Cyfip2	0.489437	0	0	0	0.03	0.05	0	0.07	0	0	0	0	0	0	0	0	2.27034	2.20302	2.32346	2.76742	4.38519	4.09021	4.73551	5.105	4.03031	2.90375	2.35969	0	0	0	0
114886	Cygb	0.691585	0	0	0	0	0	0	0	0	0	0.15	0.1	0.42	0.05	0.1	0	0	0	0	0	1.10685	1.41536	0	2.90158	3.93059	4.27862	3.17787	4.09982	3.57353	2.33487	2.68192
54151	Cyhr1	-0.309295	0	0	0	0.03	0	0	0	0	0	0	0	0	0	0	0	17.0716	20.763	13.6192	15.9641	16.8834	18.5177	17.0447	30.4829	14.6299	19.6112	21.259	24.8174	24.3975	23.3002	20.4141
13074	Cyp17a1	0.134191	0	0	0	0	0	0	0	0	0	0	0	0	0	0.62	0	0	0	0	0	0	1.90779	1.60924	0	1.90615	0	1.06313	0	16.2745	1.25064	3.96381
13077	Cyp1a2	0.939159	0	0	0	0	0	0	0	0	0.34	1.28	1.94	5.98	19.62	11.36	19.06	0	0	0	0	0	0	0	24.6175	70.8061	64.6773	135.216	50.4966	626.966	514.815	226.762
77951	Cyp20a1	-0.814286	0.19	0.34	0.5	0.17	0.53	0.4	0.61	0.32	1.45	1.41	0.38	3.91	0.51	4.17	5.11	12.9982	12.3628	9.92134	10.2888	8.22093	7.24744	6.5506	6.5809	6.16175	5.87369	5.96135	4.67693	5.65898	3.70805	3.5094
104086	Cyp27a1	0.870499	0	0	0	0	0	0	0.06	0.35	0.88	0.34	1.12	0.93	5.95	9.26	13.48	1.89939	1.85967	1.76218	3.18751	4.93696	11.4734	26.8202	13.642	11.2522	14.17	16.4568	36.6237	234.187	218.497	188.333
13085	Cyp2a12	0.962434	0	0	0.03	0.08	0.36	2.1	3.04	3.04	9.17	17.56	20.8	34.55	39.38	23.27	21.27	1.18326	0	1.3078	5.85841	12.885	13.8292	23.27	42.6353	107.104	130.802	172.927	112.128	312.894	250.854	174.601
233005	Cyp2a22	0.834583	0	0	0	0	0	0	0	0	1.7	11.17	13.06	24.07	20.59	0	0	0	0	0	0	1.36066	2.54377	3.00269	11.172	30.5028	45.442	59.6311	51.8203	118.332	1.62741	1.08654
13086	Cyp2a4	0.237835	0	0	0	0	0	0	0	0	0	0.09	0.45	0.48	2.35	4.24	3.79	0	0	0	0	0	0	9.00145	4.8563	2.82121	1.23031	1.10602	3.27035	3.19588	2.64524	0
13087	Cyp2a5	0.730882	0	0	0	0	0	0	0.07	0	0.24	0	0.69	0.58	3.37	5.4	6.02	0	0	0	1.03305	2.27552	3.84632	6.27291	3.39776	3.21154	3.95202	3.38352	5.82611	113.613	68.0894	35.1225
13088	Cyp2b10	-0.132652	0	0	0	0	0	0	0	0	0	0	0	1.73	6.17	2.16	0	0	0	0	0	0	0	0	2.61087	0	0	0	0	0	0	0
13089	Cyp2b13	0.183882	0	0	0	0	0	0	0	0	0	0	0	2.91	0	1.59	0	0	0	0	0	0	0	0	1.12805	1.86276	3.79995	5.07614	9.63048	15.6842	0	0
13094	Cyp2b9	0.680365	0	0	0	0	0	0	0	0	0.74	2.64	7.57	8.01	9.68	3.59	0	0	0	0	0	1.08819	2.22359	1.69951	33.3733	72.4694	104.83	115.707	114.5	98.0237	0	0
226143	Cyp2c23	0.883722	0	0	0.36	0.15	0.35	0.36	0.63	1.49	4.25	6.45	5.91	3.68	2.54	9.78	10.88	4.2747	6.39966	10.1686	18.2984	26.2118	25.7816	36.3613	55.0735	74.0975	104.172	103.663	73.7955	19.7485	164.648	67.5073
13095	Cyp2c29	0.906339	0	0	0	0	0	0	0	0	0	0	0.19	6.93	32.61	19.99	26.84	1.17561	0	0	0	0	0	0	0	0	1.13281	1.47247	122.441	846.418	518.725	323.018
13096	Cyp2c37	0.83952	0	0	0	0	0	0	0.03	0.09	1.67	3.93	15.64	11.42	25.5	12.16	17.96	1.80565	0	0	0	0	0	12.076	52.9374	27.4941	68.3797	52.1029	370.638	486.269	46.9847	22.5731
107141	Cyp2c50	0.87632	0	0	0	0	0	0	0	0	0	0	12.47	10.25	20.13	13.11	18.58	0	0	0	0	0	0	0	2.20603	3.28607	14.7939	19.733	64.1143	459.304	198.705	73.5898
404195	Cyp2c54	0.928186	0	0	0	0	0	0	0	0	0.55	2.02	5.79	2.93	8.41	11.86	14.8	0	0	0	0	0	0	1.80033	3.53131	3.66849	8.81639	7.86503	6.91761	58.7345	72.2134	23.2535
72082	Cyp2c55	0.618422	0	0	0	0	0	0	0	0.02	0.18	0.34	2.01	0.83	1.72	0.29	0.58	0	0	0	0	0	0	0	0	0	0	0	1.26439	12.56	5.12218	2.27784
545288	Cyp2c67	0.63423	0	0	0	0	0	0	2.55	0	2.63	3.02	5.5	0	0	8.76	3.59	0	0	0	1.05645	0	1.53773	17.202	8.25646	11.7095	13.4953	10.8977	39.4865	15.9011	113.44	170.929
433247	Cyp2c68	0.775	0.05	0.12	0.38	0.45	0.68	2.11	4.47	2.23	4.44	4.71	8.19	6.65	5.97	9.16	2.8	21.0635	16.3053	32.5343	50.9635	41.477	126.63	221.138	103.226	111.548	109.686	105.393	188.516	230.111	116.303	81.057
100043108	Cyp2c69	0.741858	0	0	0	0	0	0	4.34	2.73	2.67	2.87	5.04	3.06	6.81	10.68	1.3	0	0	0	0	0	2.86333	167.674	20.562	56.7273	25.3516	18.8943	22.6682	22.639	18.2316	6.58595
226105	Cyp2c70	0.916515	0	0	0	0	0	0.81	2.91	0.44	1.06	1.91	2.96	7.16	10.56	5.18	6.36	3.01556	2.27779	4.05892	7.73373	14.3736	62.2976	127.933	16.9157	62.5424	63.7282	50.6645	89.8543	494.684	461.199	318.731
13101	Cyp2d10	0.946243	0	0	0.04	0	0.06	0.46	1.49	1.36	4.29	10.89	12.08	13.57	10.11	20.51	18.17	6.88214	10.3248	13.1105	18.8029	34.2738	31.0996	79.3089	154.584	157.492	158.707	154.737	202.093	275.125	686.733	350.161
56448	Cyp2d22	0.928571	0	0.02	0.15	0.12	0.19	0.69	1.37	1.59	4.7	7.18	9.88	9.52	7.68	8.46	8.97	4.82076	7.34419	7.6066	11.0174	15.2572	13.8836	19.6256	33.1924	37.0008	38.8772	42.9689	51.6927	70.8296	91.212	49.1862
76279	Cyp2d26	0.816801	0	0	0.06	0.15	0.87	2.78	9.76	7.75	21.67	43.33	42.87	41.92	21.86	26.16	16.14	7.20902	10.0118	19.2451	66.3531	239.708	321.398	559.441	796.419	675.62	707.903	640.602	642.159	549.671	635.538	409.679
223706	Cyp2d34	-0.132652	0	0	0	0	0	0	0	0	0	2.78	0	0	2.33	0	4.17	0	0	0	0	0	0	0	0	0	0	0	0	0	1.22884	0
13105	Cyp2d9	0.862097	0	0	0	0	0	0	0	0.04	0.55	4.32	2.52	3.08	2.27	6.4	13.29	1.82434	1.37612	1.82731	1.89036	3.83521	4.6294	37.4355	169.518	65.5415	89.9072	90.5665	158.749	127.02	1096.63	484.797
13106	Cyp2e1	0.883409	0	0	0	0	0	0	0.83	8.26	41.28	61.74	97.59	90.27	72.17	38.99	44.61	10.0483	3.84553	3.82821	3.33944	4.11234	6.9212	67.503	543.937	579.892	874.812	802.696	1804.01	1700.36	1666.69	1080.14
13107	Cyp2f2	0.929152	0	0	0	0	0	0	0.54	0.39	3	2.44	2.76	0.86	11.86	29.26	53.95	0	0	0	1.41785	2.39215	5.12669	19.4727	21.5596	48.4451	23.4116	21.7803	4.5775	161.145	1002.37	538.619
13109	Cyp2j5	0.963476	0	0	0	0	0	0	0.03	0.04	0.58	0.76	0.81	1.5	2.57	3.27	5.6	0	0	0	0	0	1.10483	9.0324	10.011	26.2567	37.5118	48.2187	20.7848	48.2979	89.9679	128.304
13110	Cyp2j6	0.601935	0	0	0	0	0	0	0	0	0.52	0.18	0.34	0.28	0	0	0.78	0	0	0	0	0	1.27794	3.57235	3.53792	4.32933	6.09209	6.01417	7.42147	8.12874	7.35076	9.70694
56050	Cyp39a1	0.777082	0	0	0.04	0.04	0.15	0.41	1.19	2.66	6.59	3.58	5.08	1	1.28	0.69	0.46	0	0	1.78127	2.74845	4.94747	10.0805	25.1457	37.2018	12.687	11.6511	9.25714	31.7344	48.5421	2.90748	2.97723
13112	Cyp3a11	0.938737	0	0	0	0	0	0	0.12	1.76	2.11	2.65	2.38	5.7	11.63	15.19	19.11	1.85175	0	2.23911	7.94349	8.86586	18.8647	30.3022	221.395	145.842	253.219	322.395	288.739	319.84	426.611	344.401
13113	Cyp3a13	0.899939	0	0	0	0	0.03	0.15	0.49	2.2	2.52	1.88	1.98	1.77	3.12	2.97	2.67	0	0	1.06584	1.96843	1.9616	5.84682	14.7361	30.3868	13.1469	16.1731	12.128	23.6225	44.3609	30.513	50.5918
13114	Cyp3a16	0.889133	0	0	0.29	0.16	0.31	0.43	0.43	0.79	2.37	3.28	2.31	2.84	2.67	0	0	1.00408	1.08735	4.87386	16.6921	18.4666	29.9584	60.2755	100.427	108.271	134.577	126.043	103.713	17.4025	1.34966	0
56388	Cyp3a25	0.804832	0	0	0	0	0	0	0	0.78	1.08	0.18	0.52	0.67	0.49	0.41	0.72	0	0	0	0	0	0	14.523	126.315	29.1507	53.9199	56.4079	91.8602	142.05	73.8172	71.6689
337924	Cyp3a44	0.340531	0	0	0	0	0	0	0.07	1.31	2.73	2.73	2.38	3.28	8.02	8.31	11.17	0	0	0	0	0	1.01761	3.56652	76.9048	80.8825	85.2225	90.6105	65.6371	3.03203	0	0
13117	Cyp4a10	0.736791	0	0	0	0	0	0	0	1.9	3.08	1.33	1.8	0.19	0.09	0.63	0.14	1.43272	0	0	0	0	0	16.729	176.834	17.5101	60.2181	56.9934	309.81	34.7596	6.69524	0
277753	Cyp4a12a	0.751509	0	0	0	0	0	0	0	0	0	0	0	0	0	0.95	8.38	0	0	0	0	0	0	4.1798	1.09805	0	0	0	0	0	138.981	83.503
13118	Cyp4a12b	0.627364	0	0	0	0	0	0	0	0	0	0	0	0	0	0	5.29	0	0	0	0	0	0	0	0	0	0	0	0	0	45.0495	22.0512
13119	Cyp4a14	0.828131	0	0	0	0	0	0	0.09	14.77	26.51	10.09	16.05	3.86	1.47	4.28	0.34	2.62849	0	0	0	0	1.01826	32.6716	632.81	159.094	200.141	188.502	542.796	113.736	2.42243	1.07534
100040843	Cyp4a32	0.105992	0	0	0	0	0	0	0	0	1.1	0	1.48	0	0	0	0	0	0	0	0	0	0	2.36084	11.7992	1.41779	4.6998	5.14404	39.7319	8.90187	5.27496	4.50584
13120	Cyp4b1	0.418755	0	0	0	0	0	0	0	0	0.03	0	0.46	0.04	0.13	0.17	0.32	0	0	0	0	1.89382	1.97803	3.84011	6.52212	5.84108	6.548	5.49796	5.51108	5.61909	6.36847	3.94473
170716	Cyp4f13	0.841699	0	0	0	0	0	0.05	0.08	0.05	0.14	0.25	0.25	0.12	0.39	0.28	0.45	2.22996	2.70163	2.80339	3.43494	5.73723	7.07481	20.7176	17.8423	14.0873	12.3652	13.0897	15.0936	23.9021	48.9039	36.3816
64385	Cyp4f14	0.750696	0	0	0	0	0	0	0	0	0	0	0	0.6	3.29	2.27	1.62	0	0	0	0	0	0	0	0	5.18895	10.063	17.8398	1.18404	113.114	167.203	79.1977
106648	Cyp4f15	0.927672	0	0	0	0	0	0	0.03	0.04	0.08	0.29	0.39	0.83	0.98	0.96	0.99	2.4117	2.9642	2.99779	5.33926	7.3317	9.10228	20.4886	25.4148	30.1788	34.3894	36.4143	50.6703	50.7018	53.9635	34.8945
70101	Cyp4f16	0.649426	0	0	0	0	0	0.03	0	0.02	0.03	0.05	0.09	0.07	0	0	0	3.77512	3.44933	2.90444	3.52439	3.50851	3.41068	4.6228	4.95451	4.72356	5.29675	4.63765	4.78661	4.02395	1.19803	1.47843
102294	Cyp4v3	0.900649	0	0	0	0	0	0	0	0	0.06	0.24	0.18	0.79	0.75	1.44	3.81	2.28875	2.34183	5.32351	8.23862	9.67318	12.8186	18.9759	17.0913	17.1797	28.0245	24.5302	41.6814	38.5714	135.373	105.576
13121	Cyp51	0.561216	1.14	0.99	1.76	1.43	1.45	2.32	2.8	1.02	1.63	1.96	1.02	0.06	3.06	2.76	1.28	28.6782	24.8591	29.9107	32.8646	27.8039	33.3023	35.0842	13.9344	14.4362	18.5508	18.2728	5.50133	98.2758	21.4795	44.0458
13122	Cyp7a1	0.304168	0	0	0	0	0	0	0	0	0	0	0	0	0.2	0.07	0.15	0	0	0	0	0	4.22081	10.3198	3.40516	6.28478	7.68775	18.5262	2.45181	64.7018	4.15127	2.93506
13123	Cyp7b1	0.759257	0	0	0	0	0	0	0	0	0	0	0	0	0	0.08	7.78	0	0	0	0	0	0	0	0	0	0	0	1.12326	2.85039	116.256	240.255
13124	Cyp8b1	0.850212	0	0	0	0	0	0	0.41	0.7	0.66	1.62	1.21	0.71	0.64	1.26	3.51	0	1.17457	1.10849	1.50812	11.1358	18.3879	48.0418	61.2758	77.9085	115.779	221.325	63.6376	147.096	204.497	110.025
19157	Cyth1	0.371154	0	0	0	0	0	0	0	0.03	0	0	0	0	0	0	0	3.18496	1.45562	2.45534	2.30721	3.81074	2.51975	6.09292	7.98813	6.58307	5.84176	7.34891	5.63894	7.62377	6.81215	8.05337
19158	Cyth2	0.694384	0.02	0.05	0.03	0	0	0	0	0	0	0	0	0	0	0	0	17.0414	17.9115	14.2453	13.2477	13.8765	10.6968	9.40377	10.5382	9.1176	7.38474	8.15463	8.91534	7.98085	8.14854	7.59413
19159	Cyth3	0.662998	0.02	0.02	0.05	0	0	0	0	0	0	0	0	0	0	0	0	20.9632	19.2022	21.2613	20.912	15.6573	11.7631	9.0379	7.23526	5.95575	4.40063	3.15592	2.32763	1.93349	0	0
72318	Cyth4	-0.126773	0	0	0.01	0	0	0	0	0	0	0.05	0	0	0	0	0	6.40029	7.79248	5.981	7.34917	8.52359	7.25187	7.31012	9.74513	8.88502	7.23114	6.31806	3.63053	2.92018	2.59723	3.43083
74098	Czib	0.25	0.48	0.57	0.42	0.27	0.38	0.81	0	0.69	2.17	2.51	2.61	3.76	1.05	1.11	0.92	13.8189	9.01674	9.8455	9.21772	7.63076	9.78417	9.93146	8.87055	11.6631	9.63132	10.817	10.7773	10.3713	7.55791	7.82662
208846	Daam1	0.0796453	0.01	0.05	0.06	0.02	0.03	0.01	0	0	0	0.03	0.04	0.05	0.06	0	0.04	12.1817	8.01686	13.4311	13.2047	8.47147	8.04601	6.40736	4.78162	7.38753	8.05069	5.90096	5.81377	3.67553	3.11308	2.90777
13132	Dab2	0.356313	0.16	0.16	0.17	0.13	0.14	0.19	0.13	0.18	0.3	0.49	0.54	0.34	0.18	0.02	0.22	8.08436	6.75572	5.72559	4.82955	5.02413	5.21234	5.11367	6.28684	6.64078	7.90329	5.03593	7.05817	3.06677	0	1.21344
13135	Dad1	-0.385714	6.05	6.22	7.1	5.82	8.05	13.07	17.47	20.75	28.01	32.13	37.39	35.95	29.54	26.48	26.54	80.6196	116.136	89.0579	80.606	82.92	87.2534	78.6686	67.8238	86.6547	67.0244	75.5844	74.5835	85.4004	112.243	84.8967
13138	Dag1	-0.504525	0	0	0.02	0.02	0.02	0.08	0.03	0	0.07	0.06	0.07	0.09	0.11	0.14	0.14	9.47013	13.7325	9.39119	9.80882	13.5442	7.1824	9.91018	10.7677	12.0886	15.6869	8.66457	8.5531	11.6925	9.06903	5.33945
231871	Daglb	0.347183	0.01	0	0	0	0	0.01	0	0	0	0	0	0	0	0	0.01	5.68445	6.49817	5.07687	4.4738	4.89074	3.93818	3.57173	3.66761	3.37978	3.12093	2.89234	2.83787	2.8948	6.92614	5.7346
65111	Dap3	-0.489286	0.43	0.56	0.4	0.29	0.27	0.23	0.2	0.34	0.65	0.66	0.62	1.54	0.75	0.59	0.74	29.686	41.5008	25.2939	23.3476	29.3111	21.0211	27.408	14.1467	14.8448	15.832	16.1877	20.6905	17.5231	15.5124	13.5967
69635	Dapk1	0.325988	0	0	0	0	0	0	0	0	0	0	0	0	0.01	0.1	0	5.94457	6.01579	5.90194	7.40747	8.31998	10.735	13.7313	13.2038	10.8919	14.5439	11.7384	14.9826	12.6131	14.0988	8.46738
13143	Dapk2	0.591608	0	0	0	0.02	0	0.01	0	0	0	0	0	0	0	0	0	6.7172	7.42187	12.7496	15.7951	12.131	13.812	10.4769	5.7738	12.8776	9.23204	9.85857	10.6254	3.26482	3.54584	2.13638
13144	Dapk3	-0.196932	0	0.01	0	0	0	0	0	0.01	0	0.03	0	0	0	0	0	24.7337	33.3255	19.058	18.294	21.7449	15.3351	15.8076	14.8089	15.6122	12.9319	13.8938	12.9998	17.4765	29.5272	20.8555
26377	Dapp1	0.434568	0.01	0	0	0	0	0	0	0	0	0	0	0	0	0	0	10.5827	5.81387	7.29677	6.62022	5.20341	6.68479	6.57374	3.55275	3.20166	1.92456	1.43494	1.0741	0	0	0
226414	Dars	-0.457143	10.63	7.09	5.85	9.54	11.06	14.55	20.72	12.71	19.25	13.83	22.69	22.64	22.16	13.57	9.56	39.7209	26.7126	33.1341	29.2146	26.6678	27.9232	23.2651	16.3116	18.7597	19.4681	18.2983	16.2039	17.547	12.5506	12.0444
226539	Dars2	0.221825	0.18	0.15	0.14	0.12	0.1	0.03	0.05	0.07	0.12	0.17	0.08	0.17	0.09	0.06	0.29	9.96736	9.58369	10.4491	7.5215	5.97287	4.04075	3.84627	3.62361	5.00313	4.21473	3.95536	2.7159	3.91165	2.96547	2.71982
70248	Dazap1	0.407143	4.6	2.78	3.34	3.15	2.88	2.52	1.84	3.82	5.99	3.54	4.18	1.87	1.71	1.01	0.94	77.7211	95.2128	74.1315	57.2473	62.6945	52.2875	45.8076	36.1459	32.1476	24.6137	24.3997	26.8998	20.9574	16.8092	14.9718
13167	Dbi	0.778571	24.84	17.53	36.94	37.8	74.65	117.9	230.75	277.44	423.13	336.61	419.27	274.87	596.35	685.72	738.66	93.2132	65.9081	116.358	170.157	179.565	304.929	393.317	307.526	286.622	331.689	430.241	474.328	379.687	367.845	572.865
56320	Dbn1	0.818156	0.35	0.25	0.09	0.16	0.1	0.08	0.1	0.1	0.15	0.14	0.13	0	0	0	0	14.2368	11.2028	6.06089	4.90727	4.4471	5.12426	4.31134	3.89472	5.55881	6.32374	5.3831	3.28829	2.23928	0	0
13169	Dbnl	-0.110714	0.8	0.71	0.79	0.56	0.63	0.57	0.88	0.77	1.14	1.37	1.73	1.4	0.95	0.58	0.52	41.9738	47.7011	33.0928	30.5443	32.5608	24.5226	24.4491	25.4808	26.5231	25.5481	23.0959	13.8771	15.7703	18.1097	13.0258
83703	Dbr1	0.469115	0.22	0.13	0.11	0.2	0.2	0.21	0.07	0.05	0.13	0.44	0.1	0.14	0.15	0.05	0.04	10.1468	9.81328	9.87677	7.8074	6.02004	5.52452	3.42552	5.24248	4.95018	3.94977	3.95305	3.29562	3.94555	2.61145	3.23341
13171	Dbt	0.785714	0.29	0.5	1.26	1.56	2.06	4.68	6.08	9.85	19.55	20.44	32.4	52.3	39.59	31.91	20.48	6.36531	3.17753	7.86417	11.1088	7.90927	17.2182	12.8072	18.0987	16.9731	20.9038	17.938	22.1061	33.7759	8.2682	12.1658
321006	Dcaf1	0.895365	0.06	0.14	0.06	0.08	0.05	0.09	0.01	0.02	0.02	0.01	0	0	0	0	0	12.4832	11.0382	12.8797	10.2111	7.37853	7.52911	3.87317	5.07655	6.20243	4.837	4.92206	3.47872	2.64646	2.0728	2.6046
28199	Dcaf11	0.769922	0.06	0.04	0.07	0.1	0.06	0.1	0.05	0.07	0.12	0.27	0.17	0.58	0.97	0.95	0.99	21.1715	29.7434	18.9299	14.4733	17.4925	27.5514	22.1509	18.7565	33.5033	33.6703	39.8421	36.6119	102.795	58.9819	77.6979
223499	Dcaf13	0.704683	0.41	0.3	0.2	0.15	0.08	0.2	0.04	0	0.21	0	0	0	0	0	0	29.488	16.9563	23.4328	20.5999	11.0024	13.2245	11.841	17.0024	12.2385	11.4858	11.997	9.56875	9.43155	6.30916	8.00351
320808	Dcaf5	0.537277	0	0	0	0	0	0	0	0	0.01	0	0.04	0	0	0	0	4.01119	4.34225	3.9192	4.26463	4.25255	3.9418	4.58346	7.06607	7.15246	6.83728	6.85492	5.87183	4.28001	5.30996	4.86587
74106	Dcaf6	-0.0757391	0.05	0.02	0.01	0	0.01	0	0	0	0	0	0	0	0	0	0	11.7173	10.1916	13.9982	15.8014	11.4453	13.2498	11.4951	14.5451	12.5071	11.6672	8.79977	17.4132	11.5529	2.49508	4.3163
71833	Dcaf7	0.78994	0.43	0.35	0.29	0.12	0.25	0.07	0.13	0.07	0.16	0.22	0	0	0.24	0	0	23.802	21.3107	21.7383	19.8802	20.3272	14.7108	11.5704	10.2165	12.6482	13.6036	9.49416	9.54444	8.63337	4.44219	4.18846
98193	Dcaf8	-0.707254	0.4	0.3	0.32	0.3	0.35	0.35	0.42	0.47	0.57	0.58	0.53	0.57	0.38	0.26	0.48	32.7548	36.3029	32.7763	32.5447	31.4148	31.7078	28.5568	28.9715	24.3732	25.1035	22.0651	26.0526	25.434	26.9631	24.0442
68087	Dcakd	0.367857	1.34	2.09	1.15	0.9	1.4	1.09	1.46	1.6	2.6	5.1	4.55	4.68	2.25	1.33	0.56	46.1569	53.4274	32.5165	27.3595	29.3387	23.8869	18.6303	29.3272	36.2453	33.3789	38.7412	23.9341	19.6754	25.1204	14.2365
13178	Dck	0.859974	1.3	0.45	0.53	1.72	0.89	0.31	0.09	0	0	0	0	0	0	0	0	39.5206	46.9185	50.6344	45.8461	40.5592	31.1536	18.4901	13.7606	17.3395	8.98302	9.12753	2.8016	2.61558	1.47339	0
13179	Dcn	0.483874	0	0.08	0.02	0.03	0	0.11	0.1	0.28	0.65	0.35	0.54	0.7	0	0.56	0.3	14.6102	7.06274	15.3698	16.0515	11.6053	22.7263	34.1614	54.4626	46.5037	53.7776	48.8127	69.007	79.771	16.7264	28.323
75901	Dcp1a	0.878329	0.13	0.09	0.11	0.05	0.06	0.04	0	0.04	0	0	0	0	0	0	0	6.33579	5.7927	5.84539	4.46643	4.19466	3.4333	2.8489	2.47805	2.64	2.22428	2.23519	1.60799	1.44554	0	1.18881
319618	Dcp1b	0.124162	0	0.01	0	0	0	0	0	0	0	0	0	0	0	0	0	3.6192	2.37213	2.53274	1.97678	3.14826	1.79248	2.3677	2.81909	2.02996	0	2.20119	2.3724	2.03027	0	0
69305	Dcps	-0.318141	1.94	2.08	2.08	1.99	1.91	2.36	2.16	2.8	3.68	2.94	2.88	3.06	2.25	1.14	1.15	38.2623	40.9346	33.5167	30.0392	30.8475	22.8153	17.6809	15.0706	18.3637	15.8098	16.3186	14.3135	15.766	16.3912	12.5782
320685	Dctd	0.377964	0	0.03	0	0	0	0	0	0	0	0	0	0	0	0	0	12.5371	11.4104	10.0211	6.11282	3.47475	4.17236	2.2311	2.23968	1.66721	1.12705	0	0	0	0	0
13191	Dctn1	0.290324	0.7	0.67	0.54	0.39	0.54	0.65	0.56	0.37	0.55	0.42	0.72	0.62	0.54	0.32	0.29	23.8607	27.4452	22.3232	18.7707	21.8778	14.2558	11.4035	10.0688	8.51789	9.509	7.61293	7.60448	6.45466	9.76552	5.2618
69654	Dctn2	0.239286	2.29	2.12	1.69	1.24	1.48	1.4	1.37	1.45	2.62	1.62	2.34	2.45	1.51	1.53	1.47	55.7713	60.9201	50.4558	47.7214	46.7778	36.1133	34.6198	48.7304	41.6389	42.7844	46.2763	43.5834	47.076	49.8386	37.5979
53598	Dctn3	-0.00359072	0.77	0.45	0.37	0.42	0.43	0.97	0	0.45	0.5	0.76	0	0.36	0.5	0	0.18	39.2226	45.1739	34.466	30.0729	32.6491	21.5139	23.1703	24.4213	19.9155	18.1791	20.0996	19.2596	24.9177	30.9182	24.5553
67665	Dctn4	-0.304115	0.13	0.21	0.18	0.16	0.17	0.3	0.18	1.76	2.3	2.18	0.22	0.2	0.24	0.9	0.13	10.762	8.19212	11.4428	8.81413	7.53345	7.03345	5.41685	6.07806	6.93188	5.86573	6.22219	5.04657	4.22305	2.98106	3.28581
59288	Dctn5	0.505332	0.69	0.87	0.53	0.23	0.29	0	0.11	0.3	0	0	0	0	0.38	0.15	0	24.1251	25.9739	26.4522	25.1693	20.5344	21.9109	17.1851	15.8481	16.3672	15.6283	16.6446	13.6554	13.3233	12.2677	11.6467
22428	Dctn6	0.366114	0.21	0.42	0.32	0.23	0.21	0.19	0.14	0.16	0	0.88	0	0.22	0	0	0.98	27.5971	22.4622	22.0443	23.8213	20.3536	15.5532	11.3651	17.2265	14.2684	13.4138	11.8909	12.8124	10.818	5.40205	8.48079
66422	Dctpp1	0.330653	1.61	0.38	0.39	0.42	1.07	0.41	0.39	0.53	0.84	0.47	0.51	0.29	0.25	0.12	0.16	94.5696	130.526	72.2964	63.249	78.8883	55.0242	48.582	64.61	44.1474	35.8177	41.4603	40.6171	61.2491	48.1433	32.3569
114893	Dcun1d1	-0.185714	0.48	0.57	0.68	0.55	0.67	0.63	0.59	0.45	1.12	1.1	0.82	1.02	1.16	4.59	0.43	14.6564	6.88741	14.3377	16.0994	7.67273	12.1817	8.17841	9.12745	8.89146	8.70082	7.89021	7.62319	9.33103	3.00406	5.97884
76863	Dcun1d5	0.785569	0.17	0.09	0.03	0.09	0	0.02	0	0	0	0	0	0	0	0	0	55.2975	48.4688	44.93	38.8086	27.8014	24.2977	22.3227	24.8251	19.7615	18.6999	17.5898	18.0083	18.2253	14.0804	14.2883
67880	Dcxr	0.846429	0	0.04	0.36	0.26	0.57	0.7	1.22	2.58	6.43	6.12	9.39	16.73	29.09	16.43	12.54	5.59859	10.2506	8.05508	15.6394	29.3029	20.8003	25.7623	81.4348	67.1826	59.2014	77.8893	46.219	151.513	132.049	56.8521
66498	Dda1	0.591608	0.16	0.14	0	0	0	0	0	0	0	0	0	0	0	0	0	25.8269	23.7544	16.0833	19.9716	16.9363	14.507	12.7856	12.5932	11.6716	7.41319	8.447	7.05146	6.56452	7.02485	8.97177
69219	Ddah1	0.407143	1.19	1.59	2.82	2.37	2.35	4.73	6.6	7.64	12.47	9.76	12.3	15.1	14.26	9.17	10.82	13.948	13.3562	13.8003	16.0623	14.7552	21.2477	19.6812	11.4632	15.4886	22.2873	18.6239	38.1415	24.5383	11.9367	4.81806
51793	Ddah2	-0.310714	0.66	0.39	0.3	0.29	0.31	0.5	0.67	0.84	1.06	1.23	1.08	0.93	1.4	0.1	0.89	28.0091	27.0037	12.9503	15.0193	14.09	11.7596	12.9097	12.8609	13.1255	10.8433	13.6376	10.5301	4.39476	2.2135	0
13194	Ddb1	0.168158	3.01	2.63	1.72	2.07	2.12	1.87	1.49	1.72	2.42	1.89	2.69	2.66	2.4	1.34	1.89	141.326	164.686	122.579	111.31	128.658	78.7851	71.7291	67.1979	69.7344	66.6457	51.2226	52.2222	37.318	45.2006	31.9912
13195	Ddc	0.924362	0	0	0	0.01	0	0.07	0.24	0.18	0.3	0.22	0.73	0.46	1.51	3.7	3.92	1.6612	2.53246	2.96604	4.94595	5.0267	7.89828	9.78167	7.09946	7.15259	9.46077	13.12	9.34227	26.5467	41.1626	25.8231
114874	Ddhd1	0.371154	0	0	0.01	0	0	0	0	0	0	0	0	0	0	0	0	11.3684	6.56184	11.2321	7.16823	5.66402	4.40154	4.80205	3.29286	4.8887	4.73443	4.16153	2.29388	2.77536	2.09759	6.08072
72108	Ddhd2	-0.0895098	0	0.01	0	0	0	0	0	0.02	0.02	0	0	0	0	0	0.05	3.48498	2.43618	2.82746	2.81318	2.18723	2.70734	3.24317	3.53446	2.15279	2.50726	1.85496	5.62249	1.91758	1.37086	2.01263
68817	Ddi2	0.698839	0.61	0.65	0.6	0.49	0.61	0.7	1.21	1.61	1.94	2.26	2.94	3.38	3.11	2.32	1.78	12.7723	11.647	14.5801	12.6972	10.442	12.4454	11.7643	22.2027	15.8399	18.6547	16.1687	20.7176	26.6024	17.1596	21.5831
13200	Ddost	-0.707143	3.14	3.24	4.13	3.69	4.23	7.09	9.08	10.85	16.89	17.73	20.21	18.13	13.68	12.97	11.3	93.1247	115.232	87.2887	91.7323	113.627	89.6286	78.6597	47.4757	78.9593	71.5973	72.7644	65.5267	48.1802	72.1256	58.668
77006	Ddrgk1	0.101746	0	0.03	0.05	0	0.01	0	0.09	0.08	0	0.07	0	0.19	0	0.08	0	31.677	36.5014	44.5607	44.3995	39.859	41.5435	39.6297	69.8405	66.3592	66.3491	77.0703	73.3756	77.5985	132.252	67.9239
13202	Ddt	0.9	8.61	6.74	13.32	14.32	17.27	19.48	52.87	95.23	133.99	128.08	147.92	134.94	177.11	304.04	130.54	51.6512	72.5292	53.9911	72.0372	91.6537	100.872	105.553	194.386	155.625	131.057	172.175	165.365	329.582	267.424	181.888
104721	Ddx1	-0.0678571	3.17	2.6	2.35	1.74	1.84	2.13	2.09	2.66	3.8	3.58	4.46	4.14	3.79	2.4	2.69	66.9073	42.7252	53.7051	47.7618	26.3196	30.2971	24.3623	33.4479	34.5684	33.2969	33.3197	22.4994	26.1779	15.9859	22.4163
77591	Ddx10	0.508023	0.53	0.33	0	0.17	0	0	0	0	0	0	0	0	0	0	0	10.5009	3.56738	8.41198	7.45341	1.98827	4.51573	3.6949	4.45594	2.91962	3.34335	3.07077	3.03198	2.17136	0	1.86077
67040	Ddx17	0.728571	11.07	9.62	8.69	5.89	6.31	6.65	6.02	6.43	6.68	7.43	7.79	5.86	4.79	3.07	2.49	65.5766	58.6621	59.3516	54.3389	48.4359	48.3176	44.385	34.3717	41.3408	36.162	35.8995	35.7881	29.2826	13.1276	23.4316
66942	Ddx18	0.879141	0.31	0.51	0.17	0.19	0.2	0.1	0.09	0.06	0.09	0.15	0	0	0	0	0	45.7591	38.7317	33.9904	26.8789	17.4241	17.0911	13.8592	18.6216	14.1625	11.4445	9.30358	6.75012	9.01012	8.22864	7.20633
13680	Ddx19a	0.927614	1.65	1.02	1.06	0.8	0.7	0.76	0.66	0.44	0.67	0.69	0.62	0.59	0	0	0.19	43.3565	41.5211	37.3701	27.7131	32.0208	20.84	15.733	19.5678	20.066	18.5421	16.8975	9.74859	9.44075	8.06525	7.7838
234733	Ddx19b	0.716348	0.96	0.96	0.82	0	0	0.6	0.45	0.57	0.67	0.48	0.56	0.3	0.3	0	0.28	4.11785	3.66016	3.91384	3.07453	2.79439	2.77806	3.27614	4.4311	3.49811	3.51581	3.06284	2.90051	2.70794	1.73777	2.61293
53975	Ddx20	0.877156	0.32	0.2	0.11	0.07	0.15	0.1	0.03	0.05	0	0	0	0	0	0	0	12.1616	9.39531	10.4033	8.23445	6.00891	5.64063	3.70341	5.17498	4.1462	3.81912	3.8429	2.57945	1.76185	1.66853	2.45618
56200	Ddx21	0.953571	5.36	4.46	2.72	1.81	2.25	1.7	1.01	1.13	1.95	0.91	0.82	0.52	0.56	0.29	0.26	53.7496	37.5591	37.0316	29.9267	14.5577	14.1385	10.9003	14.5101	12.0789	8.02317	7.50565	4.27694	6.89824	4.93094	6.23111
74351	Ddx23	0.184093	0.82	0.58	0.41	0.52	0.5	0.44	0.61	0.55	0.92	0.91	0.57	0.57	0.79	0.08	0.37	38.0523	33.0999	29.4306	26.6624	23.3509	17.763	16.0533	18.5698	16.1855	14.115	11.9347	11.6465	13.2488	10.8922	8.65185
27225	Ddx24	0.766837	0.32	0.21	0.15	0.1	0.13	0.1	0.18	0.05	0.18	0	0	0	0	0	0	28.6043	35.6233	25.897	21.7772	21.6835	14.9741	16.2588	19.1626	15.6899	13.2577	12.1856	10.1061	9.9733	16.7347	12.1142
228889	Ddx27	0.874916	0.44	0.65	0.42	0.26	0.28	0.13	0.13	0.2	0.28	0.28	0.12	0	0	0	0.02	49.4541	43.2477	37.5015	35.1789	26.8605	19.8205	14.971	18.1269	13.5627	10.4464	9.86078	7.16311	7.12267	6.97321	7.36719
71986	Ddx28	0.309295	0	0.02	0	0	0	0	0	0	0	0	0	0	0	0	0	9.52053	12.1408	9.70206	8.5055	8.6404	7.7429	6.00112	11.9206	11.1783	11.0362	12.2602	12.6558	6.74309	11.0026	11.4974
227674	Ddx31	0.123718	0	0	0	0	0.01	0	0	0	0	0	0	0	0	0	0	4.45493	3.95514	3.04316	2.28864	2.05758	1.67015	1.54846	2.2167	1.87471	1.5702	1.50076	0	1.39528	1.3803	1.03329
68278	Ddx39	0.860714	11.03	9.37	6.83	6.08	5.95	6.45	5.96	6.02	7.49	5.81	7.14	5.07	4.41	3.01	2.17	63.6101	85.4823	106.646	44.4922	18.7791	22.8722	17.8344	14.0114	30.3872	18.9978	19.1461	8.88884	14.592	10.2758	4.00354
53817	Ddx39b	0.317857	11.62	11.61	8.04	5.9	6.67	7.15	7.95	9.38	12.56	9.33	11.33	10.66	8.08	6.46	3.82	136.452	138.757	96.3189	85.4893	92.5213	63.1757	47.6566	48.6527	48.8329	36.0569	40.5995	27.9418	23.728	17.2218	18.5126
13205	Ddx3x	0.507143	5.16	4.8	3.55	2.78	2.52	2.86	2.27	4.05	5.23	4.04	4.77	4.1	4.28	2.01	2.55	69.8644	34.3048	54.3197	53.244	26.2109	31.8929	26.0577	35.7423	31.215	33.4034	28.2403	30.0621	26.2184	11.084	25.1719
26900	Ddx3y	0.0629306	2.28	0	0	1.12	1.81	1.99	1.51	2.26	2.61	0	0	2.95	0	0	1.67	4.56757	1.38998	5.12034	0	0	0	1.07691	9.22038	6.88434	8.80432	8.24667	10.5841	9.6687	3.25373	6.1589
72935	Ddx41	0.744991	0.13	0.12	0.09	0.05	0.04	0.03	0.05	0	0.04	0	0	0	0	0	0	22.2372	21.3566	16.5978	14.7633	14.519	10.8343	11.4203	13.0295	11.0478	10.8974	10.9506	8.33099	10.1241	13.7864	11.3903
72047	Ddx42	0.437891	0.68	0.46	0.37	0.33	0.35	0.34	0.36	0.19	0.4	0.28	0.33	0.26	0.18	0.2	0.57	23.3811	16.9749	19.7095	18.4496	13.2089	14.4767	13.3748	14.2278	12.5048	12.3207	11.3775	12.3423	9.09875	4.99037	7.16681
212880	Ddx46	0.568365	0.9	0.93	0.74	0.49	0.43	0.4	0.22	0.32	0.35	0.43	0.48	0.42	0.56	0.17	0.27	16.8297	9.56708	14.4342	12.3819	6.3811	8.96278	6.55584	7.43231	5.8502	5.15515	4.72081	4.25834	4.69345	2.02437	3.33304
67755	Ddx47	0.899823	0.98	0.69	0.49	0.29	0.41	0.3	0.23	0.4	0.1	0.04	0.04	0	0.02	0.03	0	35.9837	37.2568	34.0715	29.1306	27.1342	24.0928	17.8525	17.1486	16.3414	13.3099	12.3015	13.7062	13.8364	10.8363	9.6209
234374	Ddx49	0.82176	0.06	0.05	0.02	0.03	0.03	0	0	0	0	0	0	0	0	0	0	27.0775	31.8323	20.2634	18.1127	18.9879	13.7353	12.3488	14.6213	11.8087	10.8106	11.7795	9.54787	10.0388	13.4266	11.0176
13207	Ddx5	0.414286	18.22	15.56	11.52	8.82	9.16	9.12	8.35	11.4	13.04	11.42	13.78	10.04	8.02	4.52	3.78	142.528	102.571	129.593	131.224	105.655	115.365	99.6678	101.525	104.095	89.1668	91.8693	114.466	95.9563	37.4049	71.4436
94213	Ddx50	0.24664	0.08	0.06	0.04	0.05	0.02	0.03	0	0	0.05	0.01	0	0	0.01	0	0.01	17.0014	7.1388	14.606	14.9646	7.22485	15.1936	11.1965	14.9151	15.0146	15.6586	14.2374	16.768	14.3656	5.2037	11.8239
69663	Ddx51	0.695423	0.03	0.08	0.03	0	0	0.02	0	0	0	0	0	0	0	0	0	7.87082	8.03502	6.94972	5.52123	4.04445	3.10361	3.10589	2.86596	2.48511	2.37086	2.54415	2.11644	2.17718	1.91166	2.22011
78394	Ddx52	0.698212	0.06	0	0.01	0.01	0	0	0	0	0	0	0	0	0	0	0	11.7966	6.04188	9.21837	8.44359	4.12209	5.24316	4.96305	5.84389	5.01762	5.15815	4.73242	5.12594	3.20917	1.78084	3.44254
71990	Ddx54	0.325908	0	0.07	0	0.01	0	0	0.02	0	0.01	0	0	0	0	0	0	30.7583	38.5193	21.6857	19.048	21.9502	17.2019	17.7914	19.7417	15.2783	12.9785	12.0523	10.9391	14.0294	17.3551	12.5197
67848	Ddx55	0.761981	0.02	0.05	0.01	0.01	0	0	0	0	0	0	0	0	0	0	0	7.82268	6.62539	6.91495	6.5919	4.00208	4.38498	3.57707	4.14762	2.89979	2.38624	2.84542	1.95896	2.33005	1.67377	2.49141
52513	Ddx56	0.79212	0.48	0.49	0.28	0.16	0.23	0.16	0.16	0.18	0.24	0.05	0.11	0.08	0.09	0	0.03	36.9101	42.6482	26.7527	21.2601	22.134	17.0811	14.8909	20.0791	14.2782	12.3644	11.8996	12.2629	14.2366	16.7346	10.9595
230073	Ddx58	0.848973	0	0.01	0.05	0.07	0.03	0.07	0.27	0.42	0.49	0.97	0.88	0.63	1	0.47	0.35	0	1.20915	1.82533	2.69984	2.39604	3.91248	7.81045	5.07206	6.34889	8.30466	7.16532	5.4189	5.73665	4.57928	5.15895
13209	Ddx6	0.593387	1.68	1.67	1.3	1.28	1.26	1.18	1.18	1.5	1.43	1.14	1.63	1.61	0.64	0.47	0.78	23.9714	20.0982	23.8092	23.4961	18.6112	19.8759	15.1751	15.6182	15.5452	13.5409	12.7739	13.5604	10.895	7.498	7.45474
67460	Decr1	0.832143	0.68	0.73	1.95	2.04	2.46	4.99	8.88	11.67	31.69	47.35	45.2	67.4	55.86	48.23	36.71	8.64881	8.07267	10.391	13.9125	18.7461	27.7957	27.5421	67.8161	51.7564	67.5585	68.4492	88.021	28.9848	32.5355	24.8586
26378	Decr2	0.822163	0	0	0.19	0.14	0.16	0.46	1.17	2.4	7.69	10.99	18.16	18.13	18.44	11.57	11.37	5.51499	6.04869	5.8678	6.91896	11.6013	17.3563	30.8079	55.7192	36.8435	57.0821	55.5418	111.515	52.4567	40.5874	26.9135
13244	Degs1	0.410503	0.12	0.06	0	0	0	0	0	0	0	0	0	0	0	0	0	34.7022	33.7549	33.3242	29.3887	28.8358	29.1878	24.0669	39.2516	32.4463	35.0284	31.2134	26.5927	32.5662	22.8849	18.1187
110052	Dek	0.921429	7.09	6.83	6.6	8.39	5.4	7.27	3.42	1.48	2.24	1.19	1.32	1.2	0.76	0.47	0.46	187.869	59.6815	196.988	216.303	58.8597	136.293	80.0717	73.9776	58.3283	38.9243	40.8283	23.7084	23.4418	5.14626	12.1157
227801	Dennd1a	0.146888	0	0	0.01	0	0	0	0	0	0.01	0	0.03	0.02	0	0	0	6.35451	7.5753	5.9609	4.17558	3.93215	3.86202	0	2.82703	1.82294	2.78817	3.72468	5.53753	2.929	2.12355	1.3975
102442	Dennd4a	0.258313	0	0	0.01	0	0	0	0	0.01	0.02	0	0	0	0	0	0	12.5116	7.40923	17.9143	18.9321	11.0421	14.3987	10.3895	7.45105	7.68936	4.76597	3.90055	3.66252	1.94719	1.03993	1.73354
329877	Dennd4c	0.485558	0.06	0.06	0.05	0.03	0.03	0.02	0.05	0.06	0.06	0.07	0.04	0.1	0.03	0	0.04	2.81887	1.19857	2.80699	2.74234	1.36392	1.81382	1.70597	2.2195	2.06124	2.54299	1.91364	2.32599	1.66119	1.06422	1.36939
320560	Dennd5b	0.155292	0	0.05	0	0	0	0.06	0.07	0.02	0	0.18	0.05	0.05	0.03	0.01	0.03	1.35417	0	1.02164	2.00637	1.44812	1.03163	1.32788	2.36349	2.22145	2.58764	2.67894	3.50477	2.89917	2.17672	2.89761
68184	Denr	0.453571	1.11	0.65	0.41	0.5	0.32	0.3	0.49	0.55	1.02	0.52	1.06	1	1.55	0.36	0.87	33.4589	22.3494	25.9747	23.4477	12.317	14.3412	12.9556	18.7547	16.5929	16.9066	17.6269	15.3951	19.1809	8.4612	13.751
97998	Deptor	0.88531	0	0	0	0.01	0.03	0.15	0.17	0.18	0.49	0.42	0.61	1.03	3.44	1.34	1.01	1.07388	1.24847	1.76204	2.78022	3.13765	6.94526	8.07355	6.79512	6.69869	7.5777	6.55789	13.5236	16.7244	13.2732	10.3714
232449	Dera	0.303571	1.16	0.3	0.5	0.28	0.39	0.41	0.51	0.64	1.38	0.98	1.35	1.89	2.68	1.76	2.09	23.1427	26.0638	21.9073	19.8477	19.6676	14.9886	15.5392	15.5244	17.8938	17.9714	22.0289	22.5358	26.866	33.7909	19.1659
67819	Derl1	0.463744	0	0.22	0.43	0.22	0	0.49	0.36	0.54	1.28	1.74	1.83	1.28	2.41	1.27	2.66	34.7011	39.523	34.3538	32.492	35.7991	35.6445	34.4484	34.5157	41.413	35.6871	37.1091	44.0034	36.0937	46.0167	38.2584
116891	Derl2	0.309295	0	0	0	0	0	0	0	0	0	0	0	0	0	0	1.44	14.795	7.98982	9.59982	17.7718	21.5484	33.0446	28.9053	18.0103	21.0959	13.2226	22.6638	12.3444	24.9853	44.2373	31.0483
13346	Des	0.414286	1.06	0.8	0.6	0.62	0.66	1.24	1.62	1.83	2.46	3.53	3.84	3.51	1.35	1.63	1.31	4.83089	3.82332	2.05708	1.6742	1.71227	1.46421	2.33784	2.435	3.51276	4.23063	3.05242	3.0796	2.69032	1.82626	1.46184
13347	Dffa	0.218639	0.36	0.64	0.3	0.43	0.37	0.58	0.59	1.13	1.75	0.06	1.24	1.68	0	0	0	16.92	20.0322	15.3527	14.1728	12.3228	12.0063	7.86352	8.89744	9.87876	9.1548	8.51	8.52993	7.91328	6.44687	5.93007
13350	Dgat1	0.0201456	0	0	0	0	0	0	0	0	0	0.07	0.14	0.17	0.11	0.09	0.22	6.57188	6.15	6.03847	6.17356	7.09184	11.4737	10.0847	12.0887	8.51692	8.17343	7.85346	9.05291	8.14588	7.9962	6.57068
94223	Dgcr8	0.827783	0.03	0.03	0.03	0.04	0.01	0	0	0	0	0	0	0	0	0	0	6.57431	6.83776	6.65569	6.78429	5.66535	3.43413	3.22818	4.44534	4.00342	2.57799	3.0534	1.60107	2.19208	0	0
104418	Dgkz	0.795414	0.15	0.12	0.11	0.1	0.08	0.01	0.02	0.09	0.01	0	0.17	0	0	0	0	47.0856	43.7874	32.3498	23.9479	38.539	18.9894	20.6307	23.7251	20.5267	17.9953	18.2495	17.9255	12.7331	9.82322	6.99869
217830	Dglucy	0.846377	0	0	0	0	0	0	0	0	0	0	0.09	0.3	1.44	1.8	3.26	0	0	0	0	0	0	0	0	1.14634	1.88752	1.48417	1.35888	4.74614	6.45799	5.7438
74754	Dhcr24	0.646429	0.22	0.4	0.71	1.01	1.55	2.34	1.64	0.33	1.6	2.78	2.02	0.64	1.82	0.86	1.09	69.2659	101.141	79.5778	107.826	160.078	122.532	150.649	134.924	168.552	238.057	190.795	155.654	420.266	151.097	192.429
13360	Dhcr7	-0.05	0.41	0.56	0.84	0.86	1.22	2.12	3.79	2.14	3.28	2.21	2.4	0.71	2.18	2.41	1.92	28.2208	43.7865	37.4902	37.303	54.6541	46.9293	50.2114	10.0824	16.6006	19.6656	19.0745	6.30778	53.9411	29.3162	55.6684
71755	Dhdh	0.95	0	0.04	0.09	0.1	0.15	0.21	0.46	0.6	1.39	2.21	3.69	4.19	6.69	10.12	8.53	2.2794	1.13384	2.57978	3.01594	2.35637	3.39125	4.69475	5.55963	8.58613	13.7158	13.671	18.8658	21.7605	14.3849	15.4556
13361	Dhfr	0.225	4.08	5.6	6.04	3.07	2.98	2.71	3.87	3.98	6.12	7.07	7.79	13.72	8.84	6.56	4.38	12.47	7.82977	12.9559	12.4565	5.36418	7.71378	5.36912	4.81603	8.80708	9.94599	11.5242	7.99528	7.85348	2.88518	3.54535
56749	Dhodh	0.169947	2.33	0.29	0.28	1.1	0.18	0.18	0.25	0.21	0.38	0.2	0.3	0.29	0.23	0.54	0.27	13.8509	10.5259	7.48439	7.96948	6.4757	5.82711	5.31723	3.663	4.94112	3.63351	3.34538	4.50485	4.87738	3.18543	3.1047
330817	Dhps	0.716079	0.18	0.03	0.03	0	0.04	0	0	0	0	0	0	0	0	0	0	22.5631	29.6712	18.9784	16.6329	15.7194	11.8885	10.0905	13.7731	11.7291	10.645	12.2805	10.286	10.2904	9.47788	6.87423
52585	Dhrs1	0.753571	0.53	0.4	0.87	0.75	0.74	1.12	1.68	2.06	9.53	24.65	25.55	25.61	16.86	11.83	14.33	18.1545	22.5632	17.9929	19.5409	22.9705	21.4969	24.125	77.9312	66.4412	82.3773	63.246	66.7942	56.3972	81.6878	45.2744
192970	Dhrs11	0.63807	0.95	1.26	1.68	1.1	1.24	1.37	0.39	0.15	0.22	0.18	0.2	0.2	0.8	0.32	0.98	174.279	174.485	194.144	195.389	183.925	149.675	95.1391	65.5247	70.7735	25.2312	27.2052	9.11506	17.8774	24.7064	16.5273
70451	Dhrs13	-0.157049	0	0.08	0.12	0.06	0.03	0	0.08	0.09	0.18	0.18	0.25	0.19	0.1	0	0	17.3413	20.4551	15.5155	12.1461	11.0985	7.99803	5.41418	5.92474	6.63702	4.74377	5.3934	4.14274	5.42982	2.98625	2.09156
20148	Dhrs3	0.810088	0	0	0	0	0	0	0	0	0	0	0.06	0.38	0.29	0.18	0.49	8.91739	11.2063	10.9628	10.9787	17.4422	20.3222	29.6936	22.1497	23.8367	30.0764	30.3616	41.6949	33.0718	89.0419	37.3834
28200	Dhrs4	0.907143	2.52	2.86	3.43	3.84	4.19	7.04	11.02	13.14	39.6	47	54.17	57.09	35.87	29.3	24.2	43.7103	45.1241	49.1026	51.7774	53.3263	47.7324	53.1443	112.574	86.4368	108.562	113.936	133.253	77.2332	90.5231	61.2681
66375	Dhrs7	0.707775	0	0	0.15	0.34	0.76	1.26	2.24	1.44	2.15	1.96	2.37	1.33	0.42	1.14	0.27	6.84149	6.91886	9.03068	14.5425	50.1742	64.3455	43.4621	24.6215	21.9194	30.519	26.7615	43.1005	17.6648	12.8573	6.86123
216820	Dhrs7b	-0.207143	0.08	0.18	0.16	0.09	0.2	0.21	0.34	0.26	2.19	0.54	0.56	0.59	0.52	0.38	0.41	8.8583	11.099	8.81649	8.63379	6.44681	6.78789	6.86481	4.9938	8.80555	8.00611	8.26583	5.71131	7.46553	13.5667	9.42591
209692	Dhtkd1	0.761394	0	0	0.07	0.01	0.05	0.06	0.18	0.25	1.21	1.23	2.85	3.05	2.59	2.28	1.81	0	1.11219	1.00554	2.8071	4.46913	2.36889	2.85913	5.62463	4.97046	8.83445	6.16515	8.84775	10.9518	3.0042	2.6215
13204	Dhx15	-0.634495	4	4	3.67	2.15	2.86	2.01	3.74	4.2	2.96	2.42	4.56	8.67	12.35	5.15	10.64	62.0529	33.5639	49.5598	42.773	26.9582	25.4909	21.0353	22.3672	21.7892	18.8553	14.3556	13.0898	12.7629	7.06242	10.3548
69192	Dhx16	0.809778	0.13	0.11	0.1	0.13	0.07	0.05	0.08	0.02	0.08	0	0.05	0	0.02	0	0.02	43.7434	38.4434	33.5222	32.3264	29.0348	30.9037	21.6497	21.0347	18.828	14.7377	12.7618	14.5288	14.3033	12.6407	19.0015
218629	Dhx29	0.300205	0.1	0.08	0.06	0.04	0.05	0.03	0.04	0.04	0.05	0.11	0.05	0.05	0.17	0.09	0.07	7.4485	5.82893	5.74834	4.49076	2.88875	1.82881	1.76375	2.45686	2.99984	2.87704	2.45851	1.00959	2.28907	2.20556	2.06795
72831	Dhx30	-0.20292	0.13	0.07	0.06	0.03	0.04	0.02	0	0.06	0.06	0.06	0.07	0.07	0.09	0.04	0.09	20.1202	17.9811	11.2539	10.5652	11.7823	8.98303	8.56318	10.1228	7.61998	7.84394	6.97041	5.0764	6.19171	7.49366	6.06284
216877	Dhx33	0.371154	0	0.01	0	0	0	0	0	0	0	0	0	0	0	0	0	8.32241	5.81652	5.02642	3.99554	3.63509	4.58272	3.14736	3.6101	3.27593	3.13261	2.67308	3.14036	2.23129	1.9515	1.82865
72162	Dhx36	0.0214286	0.33	0.46	0.42	0.21	0.07	0.38	0.49	0.19	0.4	0.3	0.54	0.55	0.98	0.17	0.43	12.6127	4.3215	9.77561	8.46752	3.43571	5.87668	6.1973	10.4281	7.40157	8.79078	7.18625	9.3296	5.81829	2.1429	4.68128
208144	Dhx37	0.597614	0.02	0.02	0	0	0.01	0	0	0	0.01	0	0	0	0	0	0	9.58022	11.7663	7.25784	6.76295	6.64886	3.62469	3.42453	4.25408	3.72414	3.11835	3.0038	2.56173	2.23891	3.80139	2.61752
64340	Dhx38	0.511732	0.08	0.11	0.05	0.03	0.05	0.02	0.01	0.06	0.13	0.05	0	0.06	0.02	0	0	19.2557	22.7465	16.9309	13.9909	13.997	9.73367	9.38311	10.2555	8.48429	7.68517	6.89192	4.75677	4.66912	5.96205	5.70269
106794	Dhx57	0.387479	0	0	0.03	0	0	0.01	0.01	0	0.02	0.08	0.02	0.01	0	0	0	4.2756	2.49197	4.01471	4.39034	3.20705	4.42551	4.60878	2.71334	3.06282	3.24825	2.89854	2.9346	1.88038	1.4641	2.28245
80861	Dhx58	0.270031	0	0	0	0	0	0	0	0	0	0.01	0	0	0.01	0	0.01	1.01506	1.33632	1.1251	0	1.17732	1.22378	5.97276	4.50418	3.48281	2.78944	3.18588	2.73919	2.92449	7.90542	6.43882
217207	Dhx8	0.791423	0.12	0.1	0.07	0.04	0.03	0.04	0.03	0.02	0.05	0	0.05	0	0	0	0	12.8313	14.9693	11.4953	11.9057	11.1141	7.50072	6.52273	6.53536	6.18762	5.23479	4.50464	3.12265	2.81271	4.38681	4.06221
13211	Dhx9	0.335714	3.39	3.3	2.63	2.26	2.5	2.33	2.21	2.61	4.39	2.84	3.87	3.61	2.44	1.76	1.49	47.3997	25.1465	39.2908	34.285	17.8838	18.4152	14.2808	17.2878	18.0035	16.5991	13.7524	10.6981	7.83802	3.90772	6.45486
66593	Diablo	0.634968	0.22	0.22	0	0.1	0.12	0.21	0	0	0	0.05	0.19	0	0	0.04	0	27.9809	28.8538	13.5003	11.2239	16.4388	16.5035	13.8858	5.84379	7.57558	9.45791	9.04769	7.84044	10.8244	10.9011	10.3794
13367	Diaph1	-0.32916	0.28	0.38	0.28	0.32	0.39	0.45	0.66	0.35	0.54	0.51	0.58	0.38	0.5	0.56	0.24	18.9759	21.5865	17.5274	15.5796	18.5094	14.1489	14.4775	16.0852	15.3737	15.7751	12.4819	13.1411	12.399	11.7872	9.77189
54004	Diaph2	0.438706	0	0	0	0	0	0	0	0	0.44	0.13	1.24	0.88	0.9	0.91	0.43	0	0	0	0	0	0	0	0	0	0	0	1.02943	1.00094	0	0
56419	Diaph3	0.565078	0.02	4.42	8.95	0	0.02	0	0	0	0	0	0	0	0	0	0	10.9438	6.47295	13.4327	14.3266	6.90701	7.36748	4.70223	3.0123	5.00364	2.56613	1.92911	0	0	0	0
192119	Dicer1	0.411066	0.03	0.03	0.02	0.02	0.02	0.01	0.02	0.01	0.03	0.03	0.12	0.06	0	0	0.01	8.60668	6.409	7.37685	6.75531	4.52969	4.03517	3.60862	5.50759	4.95414	5.54658	4.75477	3.78645	3.99831	2.53267	2.38951
23856	Dido1	0.753903	0.17	0.06	0.05	0.07	0.07	0.02	0	0.04	0	0.01	0	0.01	0	0	0	9.80425	8.67517	11.4333	10.5242	8.20523	6.93584	5.71341	5.4133	6.12532	4.3892	5.91394	4.84594	3.94502	1.27002	2.98523
66254	Dimt1	0.683381	0.12	0.25	0.1	0	0.1	0	0	0.07	0	0	0	0	0	0	0	6.84873	4.47656	5.50214	5.16974	3.10212	2.61789	2.29456	2.53588	2.61582	1.82793	2.22976	1.04951	1.15875	0	1.06098
239667	Dip2b	0.0486487	0.03	0.04	0.12	0.09	0	0.06	0.11	0.01	0.07	0.03	0.02	0.05	0.09	0	0	2.18454	1.88245	1.62988	1.93336	2.15515	1.96953	1.79582	1.75612	1.90805	2.0792	1.45109	1.37852	0	0	0
208440	Dip2c	-0.158777	0	0	0	0	0	0	0	0	0	0	0	0	0	0	0.02	0	0	0	0	0	0	0	0	0	1.4809	1.08064	1.09526	1.0147	0	0
68861	Dipk2a	0.658303	0	0.02	0.05	0.07	0.11	0	0.04	0.05	0.43	0.59	0.36	0.45	0.08	0	0.03	7.6754	5.28908	7.50491	8.62517	5.50233	7.11096	5.57397	12.5433	13.4407	17.6246	15.4563	20.2545	5.76716	3.47497	6.2955
72662	Dis3	0.817857	0.47	0.36	0.32	0.18	0.28	0.2	0.11	0.22	0.31	0.1	0.33	0.12	0.09	0.01	0.03	13.7864	7.75096	11.7294	9.1712	5.10624	4.90124	2.88863	4.30496	3.68636	3.36627	3.65031	1.78753	1.61956	0	1.0476
213550	Dis3l	0.178297	0	0	0.01	0.02	0.01	0	0	0	0	0.04	0.02	0.02	0	0	0	5.90018	6.61336	4.81864	4.70369	4.06578	2.80891	2.63531	2.92927	2.70639	3.15849	3.1123	2.91936	2.81957	4.06411	3.3616
208718	Dis3l2	-0.489723	0.33	0.27	0.54	0.34	0.26	0.59	0.49	0.27	0.89	0.77	0.73	0.15	0.31	0.02	0.16	5.64587	6.82995	5.44882	4.82707	5.14068	3.63096	2.98012	5.64269	4.03583	3.84206	3.82227	4.15839	3.91705	5.51645	3.95848
245474	Dkc1	0.201966	0.95	1.05	0.8	0.57	0.57	0.56	0.51	0.5	0.97	0.75	0.86	0.63	0.52	0.53	0.74	57.9015	23.0524	43.6845	35.9588	13.0355	22.3847	13.6273	13.4551	11.82	7.47177	6.74344	4.19272	7.31981	2.46108	2.87767
235339	Dlat	-0.618963	1.26	1.24	1.33	1.25	1.33	1.45	2.08	2.77	4.09	4.27	4.27	5.89	5.84	6.76	5.64	21.9821	17.4084	17.4665	15.5336	11.6062	9.85916	10.9064	10.6323	8.42931	10.429	7.27467	15.1671	12.786	7.60794	7.75478
13382	Dld	-0.0357143	3.12	3.22	3.2	3.16	3.58	5.54	5.73	9.6	16.25	15	17.88	27.67	20.78	26.25	19.81	49.1459	25.169	44.4358	42.0776	22.5561	35.4215	28.6208	36.4381	41.8537	40.9247	44.5315	44.9063	46.7448	18.2647	27.6292
13383	Dlg1	-0.257373	0.11	0.07	0.12	0.1	0.14	0.13	0.11	0.23	0.63	0.22	1.32	1.84	0.25	0.62	0.58	11.155	6.88171	9.77963	8.75806	6.65731	7.45498	5.93672	4.35571	7.54668	7.33283	6.25112	10.661	5.27484	3.25303	5.07776
53310	Dlg3	-0.247657	0	0	0.04	0	0	0	0	0	0	0	0	0	0	0	0	1.80164	1.08292	1.32336	1.64778	0	0	2.64153	3.33257	2.73345	3.2348	2.77565	3.86342	3.4341	2.47825	2.23252
228836	Dlgap4	0.553125	0.05	0.05	0	0	0	0	0	0.02	0.03	0	0	0	0	0	0	8.70322	8.71137	4.28573	6.39121	7.96731	5.75294	5.7062	7.2286	5.26677	5.92457	5.92579	4.16912	3.2247	4.07784	3.58304
218977	Dlgap5	0.738312	0.09	0.61	0.03	0.01	0.02	0	0	0	0	0	0	0	0	0	0	18.0514	12.6153	32.3154	30.7799	13.6835	13.3455	7.32488	6.21419	6.47956	4.91072	3.97464	2.0947	0	0	0
13386	Dlk1	0.891761	2.69	1.61	1.32	1.42	1.3	0.69	0.27	0	0	0	0	0	0	0	0	205.991	229.084	167.48	195.473	212.295	122.35	51.0762	22.9013	14.397	11.9204	6.17058	3.46338	0	0	1.06227
78920	Dlst	-0.635714	1.31	1.9	1.88	1.53	1.57	2.21	2.33	4.75	8.94	8.39	10.8	12.69	12.15	12.59	11.92	76.476	89.0915	76.696	69.2813	62.3891	57.3414	49.4793	62.9723	59.5886	58.6275	64.323	56.7206	60.6951	56.3894	36.5485
66349	Dmac2	0.309295	0	0	0	0	0	0	0	0	0	0	0	0	0	0	0.07	7.2998	7.15698	5.15544	4.6999	5.84424	6.57045	7.34863	7.92169	6.46843	6.36295	7.91601	9.17807	14.4144	12.4789	12.0466
68055	Dmac2l	-0.0412514	0	0	0	0	0	0	0	0	0.55	0.29	0.43	0.76	0	0	0	4.58115	2.95464	4.31372	4.05261	2.16703	3.00807	2.8782	4.28323	2.54554	2.66847	3.82344	3.97257	3.13934	1.58767	1.52066
66233	Dmap1	0.591608	0.04	0.08	0	0	0	0	0	0	0	0	0	0	0	0	0	16.9216	20.8814	13.0147	13.8131	11.0821	9.25431	9.99975	6.27158	6.61744	8.02291	10.049	6.42057	7.69435	9.79679	6.55813
13405	Dmd	0.17853	0	0	0	0	0.01	0.01	0	0.03	0.02	0.02	0.28	0.04	0.04	0.04	0.03	1.10196	0	0	0	0	0	1.06633	0	0	0	2.63788	1.72475	0	0	0
74129	Dmgdh	0.853571	0.04	0.18	0.68	0.66	1.08	2.02	3.14	5.86	12.68	20.57	31.74	47.75	40.05	43.65	32.17	6.209	8.02179	10.5863	14.2856	17.5509	23.5844	30.9546	47.7232	84.9557	100.283	113.967	62.2883	133.561	75.9216	65.7799
13829	Dmtn	0.930678	1.19	1.39	1.33	1.03	0.71	0.57	0.33	0.06	0	0	0	0	0	0	0	96.8789	120.319	110.584	105.705	104.649	70.0134	39.3136	23.9228	32.1957	9.87099	8.99272	0	0	0	0
240283	Dmxl1	-0.132652	0	0.02	0	0	0	0	0	0	0	0	0	0	0	0	0	1.43511	0	1.73787	1.58562	0	0	0	0	0	0	0	0	0	0	0
327762	Dna2	0.854172	0.2	0.16	0.13	0.12	0.15	0.03	0	0	0	0	0	0	0	0	0	21.3605	16.9619	21.2872	18.5576	10.5698	9.65573	5.92993	5.50877	7.14659	4.49652	4.08555	2.69597	1.72707	2.80305	2.06851
433956	Dnaaf5	0.636549	0.04	0.04	0.01	0.01	0	0.01	0.01	0	0	0	0	0	0	0	0	8.5029	8.7221	5.94561	4.63269	4.9058	2.54015	2.87188	3.00321	3.21829	2.41179	2.61687	1.73322	1.37919	2.84951	2.18552
15502	Dnaja1	0.289286	4.88	3.91	2.22	2.65	1.88	1.95	1.5	1.68	2.91	2.46	3.78	3.75	4.66	4.37	2.86	76.5116	20.2911	55.4522	41.756	17.8114	34.1073	27.6224	38.0908	42.6399	46.9005	54.5811	34.6177	46.3535	27.3621	49.2677
56445	Dnaja2	0.207143	4.07	3.73	2.7	1.97	2.24	2	2.45	2.21	2.84	3.22	2.99	3.37	3.27	3.09	3.06	48.4617	36.4341	39.8695	35.6444	25.5762	24.5932	23.1875	31.6923	28.1771	27.8379	28.5152	28.5276	26.9153	20.4348	24.3638
83945	Dnaja3	0.853571	0.51	0.35	0.52	0.29	0.3	0.5	0.42	0.59	1.03	0.73	1.27	1.18	1.47	1.21	0.94	28.145	27.2171	23.6724	23.3342	24.3965	23.6853	25.5574	30.3258	32.5873	29.1124	30.933	31.6941	41.0673	31.8351	32.0992
58233	Dnaja4	0.673773	0.24	0	0.03	0.08	0.07	0	0	0	0	0	0	0	0	0	0	15.4809	16.6447	19.4412	17.0937	14.7004	10.5999	6.66425	4.2212	6.8034	2.20021	2.23773	0	1.21705	1.75048	2.27845
81489	Dnajb1	0.860714	2.54	1.9	1.44	1.58	1.97	1.52	0.57	1.1	1	0.81	0.51	0.32	0.14	0.63	0.5	42.903	53.6877	54.6715	41.1183	38.8171	30.1139	22.2602	20.5831	20.9417	13.1796	13.237	9.07082	6.97706	10.1514	5.84856
67838	Dnajb11	-0.0107143	0.91	1	0.77	0.64	0.7	1.27	1.67	1.14	2.63	2.2	2.97	2.52	2.78	2.65	3.07	48.7164	57.274	47.7648	49.5617	40.9731	32.6358	35.0624	28.0999	42.739	29.5295	40.413	18.6906	43.6562	56.9366	72.048
56709	Dnajb12	0.205679	0.06	0.06	0.03	0	0	0	0	0.1	0.2	0.09	0.24	0.13	0.5	0	0.39	13.6996	14.7973	13.1512	12.227	15.54	10.9259	11.4647	16.6395	14.2311	16.5036	15.7177	13.6268	14.0807	20.0776	12.3487
56812	Dnajb2	0.12762	0.05	0.1	0.15	0.06	0.05	0.06	0	0	0	0	0.1	0	0.12	0	0.36	11.2908	13.8572	12.9053	14.5699	18.7731	14.1624	13.1062	10.9514	17.7784	10.7191	11.2068	9.34243	12.5742	20.5971	15.6058
67035	Dnajb4	0.546429	1.4	0.94	0.95	1.52	1.06	1.22	0.35	0.68	0.84	1.14	0.69	0.79	0.53	0.58	0.52	18.6567	10.045	22.0652	10.9717	11.6454	20.02	11.6214	10.6067	12.5529	7.37357	10.3997	6.87819	7.25026	3.9163	5.9628
23950	Dnajb6	-0.5	0.37	0.32	0.31	0.27	0.16	0.33	0.21	0.53	0.94	0	0.74	1.04	1.68	0.56	1.41	49.0615	40.5373	46.6405	40.0385	32.6419	35.0918	27.4411	34.3559	27.8542	29.3546	25.1601	32.2055	16.4179	17.1024	22.531
13418	Dnajc1	0.431781	0	0	0.01	0.01	0.02	0.05	0	0.05	0.12	0.17	0.2	0.13	0	0	0.11	3.68165	3.18091	3.25139	4.91594	3.06163	4.27561	4.11869	3.3753	5.07843	3.87537	4.81035	5.03145	4.16254	4.32094	4.40402
66861	Dnajc10	0.538122	0.15	0.04	0.39	0.04	0.06	0.04	0.14	0	0.13	0.12	0.19	0.11	0.07	0.06	0.02	10.4403	6.70857	8.30367	8.48557	5.63494	6.71064	6.87708	7.77787	11.5692	9.74238	8.41844	9.35675	6.79042	2.95004	5.44972
230935	Dnajc11	-0.846429	0.38	0.39	0.24	0.34	0.29	0.45	0.57	0.61	0.88	0.95	1	1.58	1.62	1.27	1.82	39.3689	44.4372	32.1438	29.1216	25.4151	20.6468	15.1307	17.5515	18.7217	17.6287	17.9231	11.4623	12.358	16.1407	14.3835
30045	Dnajc12	0.23601	0	0	0.23	0.17	0	0	0	0	0.3	1.54	1.38	0	0	0	0	7.14266	8.87034	8.66411	10.1695	9.97513	10.9909	9.74689	8.20075	11.7501	15.1679	12.9836	23.6646	13.7415	9.78115	71.8598
235567	Dnajc13	0.0977466	0.11	0.09	0.15	0.14	0.09	0.15	0.12	0.15	0.24	0.21	0.37	0.16	0.15	0.11	0.09	7.28028	4.23985	6.38946	6.09404	3.51275	4.01466	3.81545	3.74275	4.16221	4.26634	3.57511	3.14821	2.4431	1.88464	2.47002
66148	Dnajc15	0.247436	0.14	0	0	0	0	0	0	0	0	0	0	0	0	0	0	27.6762	28.4763	26.5625	19.9892	16.7648	21.4047	21.1168	23.1038	24.9341	22.4967	28.4384	26.3684	32.6281	25.7527	27.3986
214063	Dnajc16	0.371154	0	0	0	0	0	0	0	0	0	0.02	0	0	0	0	0	3.60214	3.06093	3.40415	2.85579	3.04987	2.47648	2.73255	4.21	3.24518	3.64757	3.20757	2.74351	2.6661	2.26507	2.06483
69408	Dnajc17	0.591608	0.05	0.15	0	0	0	0	0	0	0	0	0	0	0	0	0	10.5109	10.8779	7.73388	6.84264	7.22022	5.73847	4.89044	4.93832	5.42364	3.8906	4.85011	3.12338	4.21022	3.20278	3.53771
22791	Dnajc2	0.750671	0.86	0.54	0.15	0.47	0.21	0.19	0.11	0.18	0.19	0.14	0.12	0.08	0.13	0.05	0.06	30.9813	11.8308	23.9115	19.7165	6.64841	12.3116	11.0404	11.6275	8.44349	7.29125	8.20105	5.15911	6.29882	3.14125	5.45964
78244	Dnajc21	0.433013	0.13	0	0	0	0	0	0	0	0	0	0	0	0	0	0	15.1284	7.32876	12.6542	10.6792	5.05763	7.01608	7.42335	10.0845	7.65035	6.85102	7.54799	5.94746	9.8583	4.18643	7.55013
99349	Dnajc24	0.68092	0.27	0.14	0.18	0	0.12	0.09	0	0	0.19	0	0	0	0	0	0	8.9223	8.07312	7.94187	6.42119	4.87566	4.71875	4.21027	4.24799	6.19391	5.3196	4.7328	5.14802	3.77051	3.12455	3.10765
72429	Dnajc25	0.4721	0	0	0	0	0	0	0	0	0	0	0.1	0.57	0	0.29	0.06	3.84276	2.98964	3.55766	2.85539	3.50389	3.57037	3.85264	5.26461	3.69133	4.78821	4.33775	4.7306	7.38217	5.60442	5.46981
100037258	Dnajc3	0.546429	0.85	0.94	0.97	0.75	1.4	2.99	3.24	2.62	4.27	3.99	4.83	3.64	4.5	5.07	4.17	14.3138	8.50974	14.6251	15.5738	9.70925	15.1268	24.0209	23.9618	19.8528	17.8954	14.5668	19.2636	26.1142	22.5807	44.0641
13002	Dnajc5	0.129699	0	0.36	0.52	0	0	0	0	0.48	0	0.56	0	0.89	0	0	0	19.7921	16.8399	19.9638	17.442	14.0985	13.8766	10.5515	13.9562	10.552	13.222	10.9215	7.64901	11.7988	7.20354	8.77387
56354	Dnajc7	0.503571	1.36	1.22	0.64	0.6	0.51	0.63	0.61	0.4	0.8	0.72	0.49	0.48	0.38	0.21	0.28	39.9953	22.9708	30.2452	31.5901	15.2398	24.3932	23.4624	27.9109	22.2463	20.0708	20.3266	24.7693	16.8056	7.63625	13.0697
68598	Dnajc8	0.864286	3.04	2.11	1.23	1.38	1.6	0.96	1.29	0.77	0.75	0.6	0.83	0.63	0.7	0	0.76	105.737	84.214	106.444	83.2145	58.4681	49.6171	44.3084	39.3631	41.37	30.7988	37.1626	27.0943	21.7775	14.5301	15.6951
108671	Dnajc9	0.949827	2.84	2.02	1.57	1.44	1.45	1.04	0.74	0.41	0.42	0.49	0.4	0	0.02	0	0	82.3069	65.2031	74.3817	66.4204	46.4842	45.4606	24.9985	21.6286	25.0805	14.6602	15.14	6.18112	7.00644	3.25313	2.84516
13423	Dnase2a	-0.309295	0	0	0	0	0	0	0	0	0	0.16	0	0	0	0	0	5.92883	9.32655	5.8425	6.03533	6.59651	7.02801	5.45293	5.8915	5.89092	4.8957	6.42455	5.16427	4.75629	5.24276	4.41776
13429	Dnm1	-0.183998	0.12	0.14	0.17	0.06	0.11	0	0	0.23	0.28	0	0.32	0.31	0.2	0.18	0.13	2.38166	1.7489	1.23062	1.70554	0	0	0	0	0	0	0	0	0	0	0
74006	Dnm1l	-0.449017	0.55	0.89	0.69	0.61	1.02	0.89	0.91	1.21	2.37	1.33	1.3	2.37	2.13	1.6	4.03	16.5725	6.46725	13.4528	13.5027	5.15224	9.1911	7.52901	7.67453	8.99821	9.43361	9.30011	7.81689	8.20952	2.94342	6.74256
13430	Dnm2	-0.832143	0.44	0.56	0.61	0.53	0.49	0.59	0.71	0.81	1.38	1.6	2.27	1.61	1.01	0.69	0.7	33.6003	31.8889	31.1431	29.193	33.1992	20.6955	22.8429	20.4849	20.5281	17.6356	15.3636	9.26299	12.5651	17.0428	15.5067
13433	Dnmt1	0.988383	1.51	1.68	1.26	1.02	0.79	0.74	0.63	0.34	0.54	0.38	0.15	0.12	0.01	0	0	54.4999	57.4676	51.149	44.2074	40.562	22.8201	16.818	15.3392	18.8392	12.5582	11.0129	3.80587	3.97414	2.07631	1.92972
13435	Dnmt3a	0.637922	0.34	0.18	0.1	0.12	0.11	0.16	0.07	0.06	0.14	0.08	0.1	0.07	0	0	0	12.5361	11.5315	12.3253	6.52519	9.94882	3.69972	5.6154	6.18733	5.22216	5.69483	3.87142	4.08452	2.12292	0	0
13436	Dnmt3b	0.371154	0	0.01	0	0	0	0	0	0	0	0	0	0	0	0	0	6.05321	6.01755	3.09326	2.61722	2.30866	1.60664	2.65534	2.61071	3.14363	3.25201	3.27301	1.75395	1.01535	1.42018	0
13437	Dnpep	-0.384272	1.77	1.77	2.34	2.16	2	3.61	4.07	4.42	6.61	4.28	4.92	3.7	7.18	4.49	5.23	25.0427	30.1506	20.8336	21.7643	23.774	14.677	18.3365	18.91	20.848	19.002	19.4572	11.9682	19.8854	23.3872	19.9423
381101	Dnph1	0.429593	0.76	0.65	0.57	0.27	0	0.15	0	0	0	0	0.05	0.65	0.9	0	0	27.4548	38.8652	21.7589	15.7257	12.9909	8.68223	6.74088	5.63606	4.08718	3.89998	5.39689	3.79251	11.9248	13.8978	5.46489
76233	Dnttip1	0.508023	0	0	0.16	0.01	0.02	0	0	0	0	0	0	0	0	0	0	31.7953	32.0312	31.899	29.9239	29.1171	24.4449	18.1023	20.3753	17.2727	14.0635	12.1935	12.772	10.4004	9.45739	8.9173
99480	Dnttip2	0.60859	1.35	0.62	0.63	0.08	0.1	0.32	0.05	0	0.05	0	0	0	0	0	0	24.1411	6.6646	16.6827	15.3804	4.91725	9.39454	7.12439	8.81621	8.03645	6.52869	7.05114	5.3819	5.15315	1.91752	6.47453
330662	Dock1	0.171681	0	0.24	0.04	0	0.25	0.48	0	1.06	0.87	0.05	0.04	0.06	0	0	0	2.96005	1.91165	1.87965	1.88274	1.68182	1.60636	1.82625	1.63282	1.90108	2.44423	1.60581	1.63974	1.49988	1.25488	1.27654
210293	Dock10	0.400764	0	0	0	0.04	0	0	0	0	0.01	0	0.03	0	0	0	0	1.19064	0	1.54537	1.85142	0	1.16662	1.34612	2.04227	1.58421	1.9247	1.21521	0	0	0	0
75974	Dock11	1	0.01	0	0	0	0	0	0	0	0	0	0	0	0	0	0	1.03347	0	0	0	0	0	0	0	0	0	0	0	0	0	0
94176	Dock2	0.476657	0	0	0.03	0.03	0.05	0.05	0.04	0.06	0.09	0.1	0.08	0	0	0	0	0	0	0	1.72587	0	0	1.74588	0	1.97155	1.19191	0	0	0	0	0
238130	Dock4	0.781195	0	0	0	0	0	0	0	0	0	0	0	0.04	0.01	0	0.02	0	0	0	0	0	0	0	0	0	1.51075	1.14209	1.60784	1.54363	0	1.31529
319899	Dock6	0.344099	0	0	0	0	0	0	0	0	0.02	0	0.01	0	0	0	0	4.63464	3.80467	2.61695	3.11427	3.69833	3.82016	5.31242	3.63433	4.12539	4.90502	5.43008	4.17675	4.26802	3.24754	2.38809
67299	Dock7	0.57688	0.07	0.05	0.02	0.02	0.01	0.01	0.02	0	0.03	0.01	0.02	0.01	0	0	0	5.99988	2.72436	3.53736	3.59912	2.11618	1.60195	1.39881	1.91631	2.11905	2.86145	1.736	2.83896	2.11335	0	0
76088	Dock8	0.505839	0.03	0.02	0.02	0.02	0.03	0.02	0.03	0.03	0.04	0.03	0.03	0	0	0	0	4.4968	4.51997	4.70832	3.91825	4.08411	2.98828	3.8234	3.81923	3.79902	3.96966	3.10391	1.24206	1.84968	2.73693	1.62527
102115	Dohh	0.427823	0.66	0.24	0.26	0.25	0.12	0.05	0	0.18	0	0.05	0.11	0.24	0.23	0	0	39.4512	53.7933	32.7997	28.974	33.769	27.9393	20.3161	21.3006	18.6391	13.25	20.1902	12.3608	10.8996	22.5084	16.5836
13448	Dok1	0.801868	0.24	0.12	0.09	0.15	0.47	0.04	0.06	0	0	0	0	0	0	0	0	21.3591	24.8069	21.6804	21.3775	19.4197	14.1727	9.03319	9.80765	9.40622	5.40374	4.14733	2.22685	1.73299	1.40306	0
57170	Dolpp1	-0.061859	0	0	0	0	0	0	0.13	0	0	0	0	0	0	0	0	9.66479	13.648	7.92308	8.1208	7.64504	5.90206	6.11076	5.97364	6.49844	6.13446	7.40857	5.09354	4.7183	4.80332	5.50253
320615	Dop1a	0.411977	0	0	0	0	0	0	0	0.02	0	0	0	0.08	0	0	0	1.2293	0	1.24748	1.39502	0	1.04996	1.29376	1.68373	1.78344	1.7702	1.52521	1.71608	1.19331	0	1.33114
70028	Dop1b	-0.489625	0	0	0.01	0.02	0.01	0.03	0.05	0.04	0.09	0	0	0.13	0.16	0	0.06	3.98865	4.94996	5.2954	6.73546	8.33963	6.95964	3.97726	2.4716	2.54083	3.02754	3.15956	1.59213	2.87918	3.06699	2.17698
13478	Dpagt1	0.061859	0	0	0	0	0	0	0	0	0	0	0	0	0	0	0.04	20.5354	24.6939	18.5584	20.8849	20.4434	16.1692	15.0227	17.1698	18.8988	18.4516	16.1184	14.115	14.8882	20.3346	18.5953
19708	Dpf2	0.826477	0.4	0.2	0.23	0.14	0.09	0.13	0.1	0.05	0.04	0.02	0.1	0.06	0	0	0.03	19.5129	20.8882	16.4563	16.1224	17.1239	12.4407	9.43211	9.22274	8.94681	5.22129	6.24893	4.52379	5.17219	4.74099	5.30268
116905	Dph1	0.713784	0.07	0.05	0.02	0.02	0	0	0	0	0	0	0	0	0	0	0	14.2003	15.4275	10.1353	9.40368	8.92873	6.00289	6.4058	9.12201	6.7699	7.92667	7.57033	6.42479	8.14663	12.1725	7.84169
67728	Dph2	0.684172	0.02	0.05	0.03	0	0	0	0	0	0	0	0	0	0	0	0	7.93182	6.3129	5.13007	4.20341	3.67603	2.75495	3.00393	3.92	2.20542	2.17214	1.94315	1.4234	1.15204	1.68599	1.20166
69740	Dph5	0.483874	0.32	0.34	0	0.24	0.15	0.31	0.19	0.23	0.47	0.12	0.2	0.14	0	0	0.05	8.99138	6.24886	7.06548	6.89572	2.64604	6.07561	3.81966	5.41848	4.01598	3.44909	3.95252	2.66486	4.53235	1.67704	2.14141
67228	Dph7	0.533552	0.47	0.26	0	0	0	0.01	0	0	0	0	0	0	0	0	0	8.80308	7.60263	6.62044	7.14663	5.38954	4.27661	4.30022	4.32434	3.14972	3.43855	3.00965	2.88695	2.01041	1.90776	1.83653
13480	Dpm1	0.0714286	0.41	0.31	0.42	0.36	0.8	1.57	1.13	0.68	0.91	1.03	1.37	1.39	1.46	0.43	0.99	12.916	10.151	7.50071	6.45598	9.88684	6.09275	8.75861	10.1223	5.9103	9.81134	9.37249	11.9081	15.5355	8.6047	13.5109
68563	Dpm3	-0.0929402	0.78	0.95	0	0.89	0	1.14	0.68	1.28	1.17	2.03	2.68	1.93	1.45	1.25	1.8	58.1756	75.0153	61.9203	52.2444	60.349	59.6808	61.5639	49.9156	62.1423	47.2836	51.609	62.1181	63.654	101.642	66.3924
75221	Dpp3	-0.782842	2.16	1.41	1.37	1.42	1.44	1.78	1.91	2.13	3.35	2.52	3.31	2.73	2.62	2.52	2.82	42.6545	50.6718	36.0945	28.1695	32.5494	24.9739	22.8197	23.3209	20.5167	21.8083	19.338	14.1485	20.327	35.9505	21.6116
13482	Dpp4	0.822163	0.04	0.06	0.18	0.07	0.23	0.18	0.63	0.49	0.8	1.15	1.86	4.94	5.87	6.08	7.43	2.07139	1.00408	1.68893	1.79436	1.72945	3.65384	3.16361	3.41758	5.51968	9.58901	8.41653	9.88396	12.4877	6.76723	7.90956
83768	Dpp7	0.670842	0.02	0.02	0.03	0.01	0.16	0.05	0.08	0.16	0.37	0.53	0.67	0.42	0.38	0.35	0.73	5.65163	6.29266	5.35047	5.09555	4.67987	5.77545	8.50186	5.56893	7.55569	8.68352	8.26511	7.23627	6.74065	14.5448	11.6212
224897	Dpp9	-0.156196	0.11	0.13	0.09	0.09	0.38	0.06	0.07	0.13	0.1	0.12	0.14	0.12	0.08	0.12	0.05	21.3797	24.9378	18.3452	18.2692	21.9071	18.0853	17.2297	13.4397	15.7262	17.0743	16.447	11.2612	17.2803	23.7291	29.9596
244745	Dpy19l1	-0.112642	0.02	0.02	0.02	0	0.01	0.01	0	0.02	0.04	0	0.06	0.01	0.04	0.11	0.22	15.6196	11.1886	20.1575	15.0572	8.65275	10.7193	9.36393	7.27987	8.33931	6.16676	4.99029	3.87842	6.11698	6.90833	14.4488
66310	Dpy30	0.735243	2.17	1.03	1.52	2.28	2.34	2.13	0	0.85	0.67	0	0.74	0.61	0.85	0.33	0.15	53.6867	52.159	48.5247	45.1088	26.6477	28.7286	21.3099	19.4321	19.5413	16.9931	19.339	15.9596	18.4943	10.6354	10.2094
99586	Dpyd	0.988383	0	0	0.11	0.05	0.18	0.19	0.58	1.3	2.74	3.3	4.86	5.64	8.33	7.99	5.9	1.01091	0	1.39106	1.91136	2.49501	4.23018	5.11143	10.5795	17.4873	20.6639	23.8182	21.1568	41.9664	27.1786	38.1961
64705	Dpys	0.960714	0	0.01	0.27	0.38	0.56	3.75	5.06	6.28	13.44	20.99	40.74	56.37	61.98	41.32	25.31	1.21168	1.74001	3.5161	7.66414	18.9946	31.2414	40.4927	50.0302	55.808	84.1324	78.7227	108.206	119.929	80.0355	43.2671
12934	Dpysl2	0.00358425	4.46	5.18	3.03	4.08	2.79	1.86	2.46	3.14	6.63	5.04	9	8.39	3.02	3.52	1.98	3.17536	1.81594	1.86362	2.00137	1.40449	1.76182	2.56526	1.38556	1.30835	1.14757	1.44997	1.28112	0	0	0
22240	Dpysl3	0.186579	0.23	0.13	0.09	0.1	0.07	0.1	0.13	0.14	0.3	0.33	0.34	0.26	0.1	0.06	0.09	1.51564	0	0	0	0	0	0	0	0	0	0	0	0	0	0
93838	Dqx1	0.405908	0	0	0	0	0	0	0.02	0.16	0	0.13	0	0	0	0	0	5.52384	7.25225	7.24118	9.24699	9.87073	9.7115	11.8519	10.6535	10.4657	11.6186	13.1746	14.5873	10.6827	1.35347	1.74909
13486	Dr1	0.778483	1.24	0.45	0.39	0.39	0.19	0.35	0.21	0.38	0.47	0.18	0.36	0.2	0	0	0	21.8173	20.1721	21.4748	19.9801	16.4488	12.6149	8.41932	8.70535	7.77622	6.64145	6.41025	4.7518	4.27174	3.11158	3.53777
66556	Drap1	0.207143	0.46	0.8	0.62	0.4	0.31	0.73	0.37	1.11	0.9	0.49	0.75	0.2	0.47	0	0.25	112.083	144.252	102.814	88.5337	97.8445	65.8758	72.6097	89.5519	71.3445	61.9749	71.1216	61.1052	72.2882	87.5303	63.2755
13494	Drg1	0.0160858	1.16	0.97	1.05	0.62	0.66	0.63	0.61	0.55	0.67	0.85	0.86	0.79	1.37	0.61	0.73	57.6173	60.3581	47.8256	34.2291	38.5844	26.2593	26.0958	28.394	26.8824	22.1755	23.3515	19.6063	22.9054	23.8473	23.5272
13495	Drg2	-0.287757	0.44	0.61	0.33	0.37	0.38	0.38	0.53	0.67	0.71	1	1.28	0.29	1.59	0.49	0.85	27.5479	33.0579	23.3838	20.9131	22.2696	17.5781	14.8421	14.6483	14.7451	15.5925	16.5095	13.9857	15.1292	21.3704	17.0323
13506	Dsc2	0.552381	0	0	0	0	0	0	0	0.06	0.06	0.09	0.03	0.06	0.08	0.17	0.03	1.20834	1.4421	2.51281	3.09128	2.37613	3.80483	3.84417	3.08132	4.97681	9.22165	7.24481	12.3694	6.90601	2.96866	2.7103
72107	Dscc1	0.572915	0.02	0.05	0	0.02	0	0	0	0	0	0	0	0	0	0	0	13.0284	8.95445	13.1656	9.57597	5.9071	3.52091	3.24177	2.20693	3.05927	1.26938	1.60586	0	0	0	0
13511	Dsg2	0.858678	0	0.01	0.01	0.02	0	0.05	0.1	0.19	0.18	0.37	0.56	0.49	0.66	0.26	0.53	2.19128	2.1328	3.2312	4.37068	4.15683	5.63483	5.08844	8.13886	11.4852	17.0335	12.315	15.3615	12.0512	8.79492	7.45818
66934	Dsn1	0.495461	0	0.23	0.11	0	0	0	0	0	0	0	0	0	0	0	0	14.7247	12.4197	14.5459	11.4231	7.82794	7.75907	5.27587	4.27326	4.75867	3.64301	3.45433	2.36738	1.53352	0	0
109620	Dsp	0.203753	0.61	0.37	0.08	0.22	0.08	0.29	0.33	0.32	0.52	0.84	0.81	1.85	0.86	1.01	0.83	3.47763	3.03557	3.96321	4.15193	4.23532	4.71244	4.23611	3.91178	5.79216	9.39778	5.56354	6.80888	4.34272	3.71788	2.76037
13518	Dst	0.37022	0	0	0.02	0.01	0	0.01	0.01	0.02	0.01	0.01	0.01	0	0	0	0	3.52942	0	3.37056	0	0	0	0	8.86678	0	13.6834	8.53727	0	0	6.64156	0
56431	Dstn	-0.146429	10.92	7.55	8.97	8.52	11.59	11.76	22.64	25.18	29.51	32.91	40.82	35.88	38.02	27.24	34.87	54.1867	49.4866	52.9535	57.1429	48.6055	60.7685	58.566	58.9353	44.8639	43.9991	44.9351	53.6965	67.1809	44.2827	51.6556
66044	Dtd1	0.533222	0.25	0.26	0.26	0.13	0.09	0.16	0.1	0	0	0	0	0	0	0	0.22	14.3946	14.1085	10.672	9.98913	8.04456	6.39466	5.97472	7.79023	5.12871	4.51682	5.80472	5.94253	6.96667	7.30574	4.42966
328092	Dtd2	-0.0702731	0.13	0	0.04	0.12	0.12	0.08	0.14	0.12	0.28	0.25	0.55	0.45	0.68	0.12	0.33	8.05608	8.22258	7.19823	7.46712	6.31419	5.86488	5.59968	7.19037	6.8338	6.16129	6.8116	7.17691	8.94357	6.78918	6.08267
76843	Dtl	0.508913	0.07	0.02	0	0	0	0	0	0	0	0	0	0	0	0	0	17.4965	10.2714	15.716	14.6085	6.87518	7.4457	5.15725	4.59093	5.88606	3.65708	3.38107	0	1.34978	0	0
13528	Dtnb	-0.247436	0	0	0	0	0	0	0	0	0	0	0	0	0	0	0.02	4.85833	4.94364	3.8614	1.7544	3.50143	3.41532	4.71031	0	4.65306	4.14843	1.72378	2.82121	3.99454	6.17644	2.27489
94245	Dtnbp1	-0.061859	0	0	1.44	0	0	0	0	0	0	0	0	0	0	0	0	14.6217	16.919	16.3694	13.6313	16.1685	12.676	12.4711	21.3066	17.1662	19.6318	21.6807	20.7551	20.2353	22.6076	15.9168
209200	Dtx3l	0.80429	0	0.02	0.04	0.03	0.02	0.05	0.17	0.15	0.39	0.43	0.42	0.3	0.45	0.33	0.32	1.36388	1.30076	2.37284	2.43424	2.12059	2.59742	7.23763	8.22214	8.39001	10.182	8.33361	7.51884	5.74258	4.57297	6.49294
21915	Dtymk	0.400358	2.35	2.33	3.86	2.03	1.65	1.13	1.13	1.18	2.5	2.27	2.55	2.72	1.3	0.51	0.53	89.9699	113.03	83.0093	91.7137	66.6985	62.3061	44.8812	47.3166	52.7772	38.846	47.2963	19.5674	32.1562	18.7918	13.8025
68730	Dus1l	0.061859	0.03	0	0	0	0	0	0	0	0	0	0	0	0	0	0	21.7127	33.5655	26.6923	16.8863	22.1458	11.0896	10.6612	15.7446	19.1402	16.9545	18.6658	12.8185	27.0816	23.2053	23.2144
66369	Dus2	0.371154	0	0	0	0	0	0	0	0	0	0	0.09	0	0	0	0	8.88154	8.16347	6.61541	7.30729	5.27156	5.65906	3.5995	4.92565	6.38342	5.46871	8.33818	4.91422	5.94379	4.48024	3.22123
224907	Dus3l	0.44655	0.03	0.1	0.03	0.01	0.08	0	0	0	0.13	0	0	0.05	0	0	0.02	22.1599	21.4697	14.5692	14.3606	14.8407	10.3504	10.3918	11.9598	9.75198	7.61314	9.54039	8.91445	8.07863	7.85293	7.52796
80915	Dusp12	-0.223211	0.07	0.08	0.08	0.04	0.05	0	0.15	0	0.04	0	0	0	0	0	0	10.8394	11.0092	9.4795	12.0147	9.65518	10.2258	9.57759	10.758	13.0995	12.0331	16.6178	15.4499	11.9784	6.41162	4.65676
68440	Dusp23	0.594622	0	0	0	0	0.05	0	0	0	0.07	0.24	0.22	1	0.46	0	1.22	2.74824	4.35257	3.9788	3.84456	4.83027	7.64537	5.38495	7.9669	7.88542	9.07295	10.371	12.2398	9.58804	12.5856	8.8767
72349	Dusp3	0.832143	0.79	0.37	0.3	0.42	0.83	1.19	1	2.91	2.71	4.57	5.4	8.78	2.47	4.51	7.52	6.12217	6.00756	3.78373	4.26472	4.97043	4.56985	6.0548	11.4067	6.95395	11.5856	9.93517	14.1126	8.75137	6.3761	6.6299
75590	Dusp9	0.807403	0.33	0.51	0.56	0.53	0.53	0.6	0.37	0.27	0.35	0.07	0	0	0	0	0	38.8042	49.896	30.1637	32.6924	27.7001	9.38024	2.64812	5.46678	3.28351	2.33453	1.16735	1.02638	0	0	0
110074	Dut	0.981234	13.52	11.28	9.01	5.14	4.32	3.22	3.11	1.91	2.31	1.73	1.17	0.45	0	0	0.19	123.566	138.252	120.243	88.5736	73.1596	55.307	35.1583	27.8621	34.4487	18.4117	23.1939	11.0423	10.4017	7.98065	5.39639
69190	Dym	0.686512	0.08	0.05	0	0.03	0.03	0.05	0	0	0.02	0	0	0	0	0	0	20.6713	23.1396	19.3731	14.952	14.3827	8.66252	8.49589	8.03602	9.51529	7.43958	6.66171	6.54922	8.00015	10.0331	7.14587
13424	Dync1h1	-0.577818	0.98	0.79	0.81	0.67	0.72	0.81	0.98	0.83	1.29	1.61	1.8	1.55	1.1	0.88	1.18	13.9676	17.3306	12.5403	12.1929	12.7284	8.41663	8.04976	9.65747	9.42453	8.47269	7.22916	7.00263	6.89737	6.188	7.71141
13427	Dync1i2	0.154262	1.56	0.5	0.49	0.33	0.54	0.58	0.41	0.16	0.75	0.37	0.33	0.26	0.29	0.41	0.41	28.8269	18.094	23.9899	25.9037	14.1054	19.1019	15.6601	16.1553	14.4422	15.6584	15.8055	16.2483	13.5097	9.84266	9.33242
235661	Dync1li1	-0.495085	0.86	0.76	0.71	0.54	0.58	0.99	0.98	0.73	1.03	0.83	0.76	0.53	1.54	2.28	2.09	15.7089	12.4179	13.5761	11.6204	10.0839	9.89404	7.67223	7.78404	7.79992	7.15515	5.69077	6.65627	4.46212	3.11836	4.11278
234663	Dync1li2	-0.162937	0.15	0.14	0.12	0.13	0.2	0.14	0.1	0.88	0.11	0.08	2.5	0.23	0.13	0	0.2	9.89138	6.23877	7.93258	7.33423	5.65673	6.02541	5.96265	6.19506	6.22642	6.55156	5.08164	5.50815	4.48804	1.88643	3.35448
56455	Dynll1	0.075	1.72	1.51	1.27	0.9	1.36	1.54	1.28	0.91	1.62	2.54	1.65	2.17	1.67	0.76	0	70.34	46.8921	48.0259	34.6061	30.9956	33.331	27.1506	19.6686	22.4663	18.7345	22.6231	9.50611	7.99267	5.82633	6.30346
68097	Dynll2	0.4552	1.47	1.34	0.83	0.82	0.63	0	1.09	0.89	1.64	2.21	0	2.6	2.17	1.46	0	51.4772	54.989	39.7396	38.2374	34.0887	28.7106	30.0775	38.9985	40.9814	40.0517	40.2534	46.1894	70.1564	87.9944	54.0194
67068	Dynlrb1	0.160714	2.3	1.64	1.19	2.47	2.63	4.87	9.27	14.52	8.83	8.16	9.09	6.32	13.47	33.8	7.92	57.1268	60.3961	66.7217	51.916	46.6211	46.3392	47.4017	53.8128	51.4447	52.6544	63.959	68.576	77.4843	68.4499	71.9609
13548	Dyrk1a	0.544431	0.03	0.02	0	0.01	0.02	0	0	0	0	0	0	0	0	0	0	7.86081	5.84533	8.7807	7.93067	5.30849	5.38155	5.44478	4.2049	2.41811	3.22543	2.89648	2.41759	0	0	1.40443
26903	Dysf	0.484278	0	0	0	0.06	0.01	0	0	0.35	0.02	0.18	0.14	0.04	0.01	0	0.21	0	0	0	0	1.02079	0	0	1.2287	0	1.78462	0	0	0	0	0
231868	E130309D02Rik	0.585571	0.02	0.01	0	0	0	0	0	0	0	0	0	0	0	0	0	20.6124	32.4166	14.0286	13.6576	15.802	7.6822	6.63333	10.365	6.71967	6.68122	6.56161	4.51879	5.02627	6.49994	3.53751
104394	E2f4	0.810088	0.97	0.67	0.2	0.16	0.22	0	0	0	0	0	0	0	0	0	0	180.003	217.228	187.5	167.218	155.805	98.7996	58.8104	48.4344	54.2918	26.8205	23.9962	9.37009	10.6632	11.4807	10.4227
13587	Ear2	0.36262	0	0	0.46	0	0.19	0.34	0	0.42	0	0.83	0	0.3	0	0	0	1.81945	0	2.01707	4.68591	3.61576	7.33165	9.68898	17.7999	10.0934	12.3223	11.3745	5.89994	3.82907	1.27704	2.19777
67417	Ears2	-0.324902	0	0	0.01	0	0	0.02	0.18	0.07	0.17	0	0.12	0.15	0	0.17	0.11	5.84189	6.72343	4.40875	3.44751	5.68022	4.5429	4.38002	5.69936	5.082	6.62799	6.75509	4.49898	5.24399	5.15406	4.4096
69072	Ebna1bp2	0.852547	1.49	1.46	0.83	0.59	0.52	0.81	0.44	0.35	0.35	0.56	0.21	0.05	0.14	0	0.08	35.0486	22.7218	23.1862	19.9219	12.4657	13.301	12.5133	13.2846	10.3296	8.21653	8.65531	8.65856	9.6313	5.90658	6.88872
13595	Ebp	0.614286	0.44	0.84	1.7	1.79	2.16	4.53	7.06	8.2	15.52	20.87	25.05	25.83	41.63	37.11	11.34	23.7826	29.8371	27.4965	31.7255	40.5498	43.2386	62.9878	32.2195	42.3172	39.4445	50.3038	27.4461	120.404	144.687	98.405
70601	Ecd	0.751684	0.09	0.09	0.03	0.02	0.03	0.03	0	0	0	0	0	0	0	0	0	20.9721	20.0559	14.6163	14.4451	12.8385	9.88515	10.5529	12.0207	10.3424	10.1144	9.37533	8.37454	7.57704	8.93455	7.61381
230857	Ece1	0.685153	0.02	0.02	0.07	0.03	0.03	0.15	0.05	0.06	0.23	0.4	0.47	0.22	0.24	0.09	0.19	11.7631	12.4506	10.171	11.2857	13.9973	11.4699	15.5618	21.6916	25.8298	35.2965	32.4703	28.399	36.7531	37.7045	26.2108
107522	Ece2	0.160832	0	0.07	0	0.03	0	0	0	0	0.11	0	0	0	0	0	0	11.2829	13.163	6.67898	7.54832	8.56926	5.4629	7.50631	9.80444	4.8483	4.26775	4.08232	3.0403	7.15873	8.56753	6.62722
51798	Ech1	0.842857	0.26	0.28	0.57	0.53	0.78	2.07	2.5	7.78	22.24	25.38	37.83	26.44	14.96	12.38	4.96	25.9379	31.6261	31.5009	44.1464	83.3285	82.862	124.988	171.484	121.523	149.424	171.334	224.072	88.5976	187.645	100.003
52665	Echdc1	0.507143	0.41	0.51	0.33	0.7	0.34	0.53	1.72	1.45	1	1.43	3.15	3.03	4.94	8.43	7.05	6.34952	3.5271	6.73268	6.14457	2.3759	5.16483	6.32519	2.2814	4.27402	5.35719	6.40026	5.74289	12.3196	7.34084	12.8981
52430	Echdc2	0.935714	0	0.03	0.24	0.27	0.41	0.4	1.73	1.9	8.33	10.42	18.42	22.12	13.47	10.76	10.15	6.78356	6.06789	6.36607	9.89083	12.6711	20.543	48.9632	67.8737	59.4562	75.2293	80.335	122.347	97.257	66.0883	91.8866
67856	Echdc3	0.902592	0	0	0.19	0.31	0.47	1.07	2.77	3.9	5.97	9.58	14.2	21.6	13.08	10.71	6.69	2.6072	4.03965	5.64348	7.42763	13.1532	22.024	26.9062	18.9516	34.5256	44.265	41.638	43.2977	42.3233	32.4196	18.5495
93747	Echs1	0.903571	2.22	3.07	4.83	5.18	5.86	10.63	16.75	25.54	56.42	44.72	66.55	101.16	95.69	70.59	56.61	22.8996	26.5452	29.1862	53.2581	46.8114	61.0563	56.109	60.5408	56.3885	71.8556	76.1075	83.3627	95.6995	79.785	54.3093
13177	Eci1	0.921429	1.61	1.47	2.5	2.77	2.99	5.19	7.24	8.59	18.54	25.92	35.41	49.38	32.56	28.53	26.26	38.7512	42.1111	41.2331	42.6169	48.8079	43.0544	52.1581	88.4278	72.3088	87.6271	112.76	126.268	73.2768	98.146	61.7953
23986	Eci2	0.9	0.08	0.1	0.16	0.11	0.13	0.28	0.6	1.07	2.25	3.66	6.49	9.19	4.98	4.02	4.32	26.3973	24.7959	28.1887	23.2149	24.3612	27.8713	28.5741	75.5252	43.2022	81.5996	79.5153	235.408	77.6023	49.3865	56.4442
13601	Ecm1	0.647462	0	0	0	0	1.3	0.25	4.55	2.17	2.43	2.17	1.35	1.02	1.28	0.53	0.19	9.34407	9.27961	6.75409	8.92709	22.7194	20.5151	41.6981	70.2451	47.919	53.9487	59.6689	69.1953	116.617	52.6748	43.3019
230249	Ecpas	0.457816	0.56	0.34	0.35	0.38	0.38	0.29	0.19	0.27	0.32	0.33	0.38	0.33	0.31	0.21	0.29	11.2273	6.56171	10.5186	9.51678	6.45951	6.31986	5.70713	8.45322	6.32652	6.39952	3.28079	5.18464	6.68877	2.21457	5.67478
26940	Ecsit	0.45823	0.08	0.11	0.09	0.03	0.09	0	0.06	0.08	0.06	0.06	0	0.36	0.29	0.35	0.53	21.153	28.9972	17.3022	16.1559	16.9784	13.5845	11.698	11.5497	13.9152	13.8647	15.9492	10.9163	26.0796	35.4614	21.2503
13605	Ect2	0.583643	0.03	0.03	0.04	0	0	0	0	0	0	0	0	0	0	0	0	13.9849	11.4676	16.4729	16.7853	10.1177	8.09567	4.2682	3.934	6.45632	4.65418	3.81124	2.62062	1.31855	0	0
353190	Edc3	0.865862	0.8	0.19	0.35	0.09	0.16	0.2	0	0.03	0.02	0	0	0	0	0	0	15.0301	15.8675	15.6073	14.4524	14.227	14.2066	10.4281	9.93772	8.21513	6.08253	4.97474	4.93115	4.70258	3.60478	3.30149
234699	Edc4	0.75671	0.43	0.32	0.33	0.37	0.24	0.27	0.33	0.16	0.34	0.2	0.15	0.21	0.2	0.01	0.05	18.7221	18.3066	13.919	13.6811	14.7173	10.8109	9.04478	9.59006	8.15069	6.88728	6.4387	6.79387	5.43346	4.19691	5.37516
66967	Edem3	0.644399	0	0	0.02	0.01	0	0.01	0	0.09	0.07	0.06	0.06	0	0	0	0	5.07091	3.08524	6.30819	4.8272	2.79528	4.041	3.31115	4.97046	4.35859	4.57201	3.87992	3.09812	2.64447	2.15597	3.30161
59022	Edf1	0.257143	3.68	1.69	0.94	1.07	0.76	1.02	0.96	0.7	1.42	0.46	1.22	0.9	2.07	0.71	1.39	149.157	243.249	143.024	127.094	161.039	101.042	119.617	136.013	139.968	128.449	131.079	138.987	188.813	374.448	239.208
216238	Eea1	-0.312779	0.34	0.35	0.37	0.19	0.58	0.22	0.33	0.64	0.74	0.4	0.92	1.13	1.06	0.95	1.33	3.54555	0	3.41514	3.6235	1.36259	2.41369	1.82207	2.15206	2.12045	2.6729	2.37178	2.30302	2.71456	0	1.91046
13626	Eed	0.831893	0.68	0.39	0.26	0.14	0.22	0.14	0.04	0.1	0.13	0.14	0.17	0	0	0	0	22.8126	16.2482	19.9194	18.1591	11.4402	12.4913	10.4585	10.3938	10.6448	8.61838	8.05473	6.61695	5.49791	4.09595	5.00267
68043	Eef1akmt1	0.646272	0.16	0.09	0	0.12	0.04	0	0	0	0	0	0	0	0	0	0	13.5726	15.1493	11.5158	8.59868	5.46158	5.67851	3.2904	4.01536	4.38905	3.70464	4.11702	3.46469	5.10586	6.52221	5.40847
72096	Eef1akmt2	0.590795	0.26	0.02	0.02	0	0	0	0	0	0	0	0	0	0	0	0	8.21267	5.57942	4.32356	6.14329	3.52449	5.07349	3.90705	2.09013	2.9806	3.61115	3.27194	4.04582	2.80335	1.07787	1.10671
71449	Eef1aknmt	0.473547	0.17	0.11	0.11	0.07	0.04	0.14	0.11	0.03	0.08	0.06	0.05	0.54	0.03	0	0.02	8.35912	9.52994	5.793	4.93134	4.69279	4.07441	3.14109	4.08838	3.03967	2.56677	2.05903	2.07407	1.87655	2.189	1.45817
55949	Eef1b2	0.4	53.96	43.45	33.16	30.97	28.73	28.65	30.65	33.84	47.81	32.49	46.08	38.04	31.45	29.62	25.54	321.863	357.262	311.515	240.751	203.553	222.82	218.561	243.602	139.7	104.407	115.189	115.622	107.266	75.0302	65.7412
66656	Eef1d	-0.00357143	21.14	18.85	16.19	13.98	15.81	15.14	12.97	14.62	19.66	18.71	17.42	17.76	19.6	16.97	15.37	275.186	263.154	250.249	84.7511	149.167	107.138	140.368	97.5513	87.4521	45.3558	115.806	68.1389	24.924	39.1767	49.0738
66143	Eef1e1	0.214286	1.59	1.73	1.36	1.14	1.31	1.17	1.79	1.66	2.31	0.91	2.16	1.46	0.74	1.43	1.27	68.5079	49.9388	52.8137	47.7935	35.8916	31.2081	18.3653	16.0715	16.0446	10.0773	10.3587	6.64433	4.8629	7.21896	6.16002
67160	Eef1g	-0.0892857	39.99	42.53	27.87	29.54	29.09	32.81	30.38	28.6	45.48	32.64	38.3	32.48	33.36	33.24	35.5	491.372	627.089	427.061	324.94	324.656	243.377	190.435	177.997	178.155	120.135	134.047	119.177	106.401	103.985	79.9649
13629	Eef2	0.0285714	90.89	70.86	56.18	52.65	54.4	55.79	53.28	56.04	90.29	79.98	66.01	80.69	80.5	51.57	44.27	1063.77	1497.8	915.925	789.188	948.533	599.281	643.719	845.375	559.22	488.63	421.083	513.324	596.31	623.482	384.44
13631	Eef2k	0.837431	0.07	0.06	0.09	0.08	0.08	0.08	0.05	0	0	0	0	0	0	0	0	32.7947	20.2624	18.6469	33.4304	35.1346	27.0698	11.2399	4.7162	12.3783	3.31195	3.12555	0	0	1.80998	0
65967	Eefsec	0.285714	0.21	0.45	0.22	0.14	0.2	0.16	0.24	0.26	0.61	0.43	1.53	1.04	1.32	0.84	1.54	12.5277	16.3291	10.5629	9.58239	10.4068	6.00021	5.08333	7.66761	8.76134	9.15576	12.6054	6.19344	11.3298	16.6784	9.82516
67484	Eepd1	0	0	0	0	0	0	0	0	0	0	0	0	0	0	0	0.11	2.43423	2.99262	2.29499	2.46088	3.75751	3.28356	5.08521	3.09057	4.68813	4.88577	4.78662	6.7163	5.607	4.84276	3.97101
27984	Efhd2	-0.16622	2.58	2.17	2.32	1.58	1.5	1.51	1.64	6.06	3.33	2.71	8.36	1.9	2.71	1.95	1.87	47.2919	58.0517	40.0699	37.4959	39.0448	27.6826	28.0532	34.1363	26.537	23.8668	23.605	15.598	14.4635	17.6576	18.0389
101592	Efl1	-0.142348	0.13	0.11	0.11	0.12	0.12	0.09	0.13	0.12	0.16	0.29	0.2	0.28	0.09	0.15	0.11	5.63029	4.43506	4.89161	3.69578	3.88127	3.12247	3.08551	2.75589	2.90353	2.78947	2.2065	3.03567	1.90337	2.00595	2.14242
76740	Efr3a	0.262316	0.02	0.01	0.02	0	0	0	0	0.02	0.01	0.02	0	0	0.01	0	0.02	6.38223	4.833	6.00025	5.56145	3.83413	3.95471	4.29592	4.0984	4.10758	5.33326	4.39645	5.33547	5.47781	4.34883	4.20315
20624	Eftud2	0.296429	2.7	3.11	3.76	1.34	2.15	1.47	2.65	2.66	1.87	3.5	2.89	1.86	3.08	0.86	1.26	60.6258	68.1689	51.7995	42.6925	33.5936	22.8735	18.4787	18.5147	16.4277	6.63864	12.6128	6.4321	8.76759	10.2643	5.69712
13649	Egfr	0.888889	0	0	0	0	0	0.19	0.67	0.68	1.16	1.29	1.7	1.45	2.37	2.82	3.97	0	0	0	0	0	1.80499	12.437	14.1079	6.32648	6.38672	6.93987	8.46999	13.1166	70.9467	75.0994
114601	Ehbp1l1	0.75425	0.03	0.05	0.04	0.07	0.06	0.05	0.02	0.09	0	0.01	0.01	0	0	0	0	51.6252	61.1838	57.908	56.6906	52.4479	43.0875	27.485	19.4771	19.6731	8.97929	8.5235	2.6507	1.89383	1.66723	1.58142
13660	Ehd1	-0.0857143	2.6	2	2.12	1.8	2.01	2.53	2.44	2.76	3.01	3.31	4	2.41	1.35	1.31	2.14	57.8799	85.9809	58.7266	52.2648	59.7979	39.9479	32.9857	25.4635	28.5833	25.8789	24.8921	11.7199	16.7348	17.5057	11.166
259300	Ehd2	-0.31909	0	0.07	0.16	0	0	0	0	0.45	0.16	0.27	0.44	0.16	0.09	0.12	0.07	4.4775	5.01255	3.27674	3.31478	3.2547	2.23502	2.48984	1.85973	2.96945	2.63246	2.43396	2.06384	1.27719	0	0
57440	Ehd3	0.214286	0.93	0.68	0.96	0.9	0.94	1.32	1.38	2.98	3.53	2.97	4.58	3.38	3.67	2.2	2.23	23.6084	25.8179	17.058	17.4969	18.9353	15.8032	20.055	30.7007	23.708	29.5216	23.2757	19.97	21.312	13.5298	9.00544
98878	Ehd4	0.184258	0.48	0.28	0.39	0.36	0.33	0.41	0.43	0.89	0.79	0.61	0.61	0.6	0.32	0.3	0.28	9.7079	11.3931	7.6782	6.56292	8.13623	7.56135	6.61144	7.70118	7.62712	5.47809	4.14711	3.83946	3.4159	2.24772	1.7438
74147	Ehhadh	0.864286	0.05	0.14	0.44	0.56	0.89	1.43	4.22	30.56	78.23	55.16	63.81	44.12	33.22	31.35	25.61	3.64164	5.02227	6.32775	8.00577	10.3567	12.9885	24.7286	137.375	40.253	52.2857	46.0513	96.1096	37.9004	42.5039	16.2811
77683	Ehmt1	0.792622	0.17	0.12	0.04	0.04	0.03	0.02	0	0	0	0	0	0	0	0	0	9.75075	7.20903	7.02586	6.30327	4.98036	5.1486	4.63042	5.69436	5.20233	4.70623	4.59746	4.11623	3.2528	2.71331	3.42808
110147	Ehmt2	0.749076	0.09	0.05	0.04	0.03	0.03	0.04	0.02	0.09	0	0	0.87	0	0	0	0	34.156	47.4939	31.1874	29.0024	30.4801	24.7863	20.5035	32.4373	26.4138	26.0322	27.592	24.6323	20.3899	22.8086	15.4141
13663	Ei24	0.629486	0	0	0	0	0	0	0.09	0.06	0.17	0	0.26	0.37	0.36	0	0.3	21.4868	24.6291	18.0812	15.2982	16.3877	17.0312	18.6658	37.0354	33.4846	38.2135	40.2525	47.1233	82.3063	50.8926	40.2275
20918	Eif1	-0.137623	6.06	7.49	6.14	4.49	3.98	4.12	4.3	4.05	7.74	6.09	6.33	4.5	7.49	5.15	5.96	344.105	376.809	328.875	300.084	318.224	295.054	250.773	238.805	189.863	162.643	172.864	262.289	199.938	167.147	125.349
69860	Eif1ad	0.694384	1.51	0.29	0.95	0	0	0	0	0	0	0	0	0	0	0	0	34.2866	29.4102	26.3644	21.1713	18.053	15.4624	11.5627	14.9876	13.8978	9.79499	11.2316	6.43743	9.94469	8.58142	6.90176
66235	Eif1ax	0.789286	3.66	2.37	1.89	1.28	1.69	2.07	1.55	1.44	2.21	0.74	0.71	0.83	1.53	1.24	1.19	26.1509	24.2684	24.8924	19.7359	15.0472	13.4098	9.63484	8.34043	9.25667	6.80213	6.8239	5.48223	7.06029	4.7041	4.00555
68969	Eif1b	0.756277	1.94	2.11	1.41	0.97	1.53	1.37	0.87	1.14	1.66	0.93	0	0	0	0.84	1.16	68.5786	68.6789	59.4889	50.1916	39.5825	40.6291	27.6704	30.4064	25.4112	18.9198	19.1935	17.2722	21.0617	22.8887	20.3895
229317	Eif2a	0.11975	2.56	1.92	1.4	1.21	1.21	1.32	1.36	2.15	3.37	3.04	4.06	2.26	4.49	1.34	1.09	32.8648	15.3308	25.5425	24.1325	11.1125	15.0547	13.3243	15.3731	13.2057	10.8675	12.303	16.1307	14.0444	5.69488	8.41619
15467	Eif2ak1	0.886405	0.05	0.14	0.15	0.12	0.09	0.02	0	0	0	0	0	0	0	0	0	61.1778	73.0702	79.9414	72.1802	70.2316	52.681	33.3932	23.5888	24.587	13.9644	12.3982	8.8529	8.72669	11.0998	8.47885
19106	Eif2ak2	0.284437	0.15	0.13	0.23	0.1	0.15	0.11	0.48	0.13	0.33	0.32	0.18	0.5	0.16	0	0.2	4.45841	2.17659	4.99923	5.1759	1.69588	3.72622	6.45863	4.8023	4.41544	4.59155	3.95689	3.22062	2.71772	1.56016	2.65568
27103	Eif2ak4	0.617765	0.01	0	0.01	0	0	0.01	0	0	0	0	0	0	0	0	0	4.41608	3.17841	4.05558	4.17016	3.17016	3.69399	3.6868	3.62983	2.71687	2.97546	2.435	2.83833	1.43033	0	0
209354	Eif2b1	-0.133097	0.7	0.4	0.13	0.26	0.18	0.26	0.18	0.4	0.22	0.71	0.22	0.59	0.19	0.19	0.19	33.8067	33.9827	29.4555	23.4328	17.5943	14.6956	11.9148	12.584	11.3079	10.074	10.9029	9.24727	11.4632	12.7562	11.7159
217715	Eif2b2	0.270368	0.54	0.57	0.29	0.39	0.29	0.35	0.58	0.22	0.28	0.35	0.53	0.27	0.27	0.24	0.33	30.4839	35.76	23.1069	19.7328	20.7998	11.9196	12.7708	13.9381	12.4808	10.4231	12.6228	10.6149	10.5625	18.4719	13.6964
108067	Eif2b3	0.374892	0.52	0.64	0.41	0.26	0.33	0.24	0.18	0.2	0.43	0.34	0.43	0.25	0.17	0.2	0.43	18.5694	17.2892	14.2356	14.3825	8.18271	7.96122	5.05689	8.84719	6.77812	5.03248	5.4743	2.43632	6.10798	3.27018	4.6783
13667	Eif2b4	0.0878142	0.53	0.68	0.49	0.3	0.43	0.21	0.34	0.33	0.5	0.72	0.43	0.42	0.53	0.3	0.5	30.3568	35.5181	26.6372	21.1081	19.8147	16.2516	15.8787	22.154	19.8077	14.4185	15.7138	14.1175	16.9698	24.8539	18.1643
224045	Eif2b5	0.47585	0.48	0.47	0.35	0.39	0.33	0.4	0.27	0.24	0.35	0.23	0.45	0.31	0.4	0.25	0.38	28.4419	34.3907	23.6645	18.2755	17.7721	11.7351	10.1015	10.2873	10.6236	10.3244	9.72936	7.7026	11.8655	14.3739	10.9465
16865	Eif2d	0.0819076	0.22	0.08	0.11	0.07	0.07	0.1	0.07	0.07	0.17	0.16	0.19	0.17	0.12	0.07	0.33	17.8728	21.9127	15.9106	14.3817	14.4105	10.0597	8.71978	8.76044	11.543	10.0217	10.8224	10.2556	10.1704	15.0936	10.44
13665	Eif2s1	0.557143	13.84	15.03	9.33	8.27	7.41	9.34	7.72	8.47	12.53	9.36	9.67	9.55	6.27	6.06	5.18	49.9009	30.5675	38.441	35.3303	20.698	22.0531	13.3262	12.6606	16.049	13.4373	13.5374	9.14562	9.71666	5.87696	8.3191
67204	Eif2s2	-0.153709	7.05	7.82	4.76	4.48	4.93	4.32	4.39	3.69	9.24	5.74	6.29	6.18	5.74	3.51	5.5	108.735	27.5699	70.4369	74.3559	34.6905	58.7146	40.2292	40.1845	34.52	25.2205	36.1642	24.1674	38.4499	20.1432	26.2769
26905	Eif2s3x	-0.125	3.5	2.9	2.23	2.08	2.26	2.16	1.6	1.2	3.89	2.91	4.32	3.87	2.28	2.48	0	59.9624	38.8685	46.5547	46.9737	27.018	28.4479	19.8336	14.0567	15.6168	13.4368	12.7043	10.1636	13.4455	7.90685	9.58484
26908	Eif2s3y	0.116801	1.58	0	0.88	0.62	1.46	1.5	2	1.13	1.88	0	0	3.35	0	0	1.81	9.60775	2.99058	9.38404	0	0	0	1.93398	13.8373	12.2951	11.8863	10.5793	15.4275	15.4037	2.81934	12.1045
13669	Eif3a	0.375	6.44	5.71	4.69	4.6	4.58	4.04	3.89	3.55	5.77	4.98	4.81	3.98	4.17	3.74	2.39	99.7664	40.417	86.4776	76.4172	28.453	50.916	39.5428	41.9502	35.6706	31.7956	30.6926	36.138	26.2775	10.177	21.763
27979	Eif3b	0.289286	6.6	5.65	4.67	4.19	4.15	4.18	3.67	3.37	5.14	5.86	4.93	4.57	4.44	3.78	2.9	163.57	206.999	134.013	111.191	116.435	71.767	57.3288	66.8902	64.909	48.435	47.9073	31.7514	46.1287	57.3819	38.9629
56347	Eif3c	0.8311	3.88	3.4	3.01	2.64	2.64	2.61	2.43	2.05	3.18	2.77	2.57	2.38	1.81	1.4	1.3	88.5009	83.0045	75.1338	63.7592	55.9685	40.673	36.6778	41.0371	41.4679	38.4036	33.6937	31.4089	34.0707	36.0741	30.0875
55944	Eif3d	0.617857	5.71	4.57	4.17	3.51	3.92	2.68	3.14	3.35	4.07	3.98	4.48	2.77	2.42	2.25	2.33	174.106	223.286	144.528	127.194	121.438	74.1239	57.347	63.7701	57.9909	43.9893	47.3987	31.094	39.301	50.9244	33.6377
16341	Eif3e	0.271429	6.58	7.48	5.6	4.92	4.48	3.96	3.84	4.65	7.15	6.06	6.59	5.66	5.39	2.64	3.66	119.57	79.2813	99.2092	81.4622	58.3346	56.6347	42.8899	56.8607	39.866	37.3943	38.7074	33.5787	40.0228	24.1219	27.1681
66085	Eif3f	0.639286	6.64	6.37	6.55	4.67	34.54	6.05	5.05	23.46	6.5	5.62	6.09	5.13	4.13	3.24	2.47	107.797	133.288	85.1222	78.4242	89.7957	50.1663	55.8114	72.2759	52.5684	40.444	37.233	36.4671	41.2553	42.0701	28.255
53356	Eif3g	0.757143	3.52	3.72	3.32	2.59	2.65	2.71	2.04	1.88	1.76	1.77	2.32	1.65	2.16	1.14	1.23	190.26	231.28	160.41	130.817	129.439	93.4412	85.5836	82.1001	78.6749	54.9011	63.0247	54.036	56.9255	87.1772	61.2035
68135	Eif3h	0.750671	8.04	6.86	4.76	4.64	5.36	4.64	3.89	3.39	7.53	5.14	4	4.04	3.26	2.62	3.34	196.938	218.811	183.7	156.021	159.18	112.33	98.4194	115.776	110.238	95.2077	94.4745	99.8342	89.7412	81.5985	67.3658
54709	Eif3i	0.417857	9.52	6.21	4.81	4.85	4.44	4.79	4.47	3.88	6.42	5.88	6.01	4.38	3.51	2.62	2.6	197.524	217.905	85.7223	145.45	115.867	105.638	72.7359	92.5322	66.0577	53.9825	62.4828	63.724	60.0563	63.8935	56.1919
78655	Eif3j1	0.117857	1.71	1.24	1.33	0.7	0.56	1.23	1.11	1.28	2.11	0.92	1.59	1.54	0.99	1.16	0.95	31.0024	17.7943	26.4023	24.36	13.2684	19.2934	14.2391	16.0157	11.5087	8.85028	10.1455	7.92613	11.5444	6.72235	9.61199
73830	Eif3k	-0.203571	5.48	4.41	3.98	3.63	3.77	3.64	3	2.52	6.2	4.12	6.11	8.72	9	6.88	2.35	265.076	333.281	253.637	211.087	232.622	168.311	127.528	113.11	93.6238	67.1955	69.5328	69.0704	58.2774	84.1921	57.298
223691	Eif3l	0.293119	5.81	5.1	3.96	3.25	3.42	3.25	2.71	4.09	4.41	7.37	3.56	5.59	3.48	1.94	2.26	122.85	134.762	101.445	86.0478	83.896	52.4782	43.3903	50.1635	51.7136	41.6222	41.1699	33.7964	44.1442	38.8262	31.2997
98221	Eif3m	0.134048	3.02	2.7	1.99	1.75	1.93	1.87	1.87	1.62	2.58	1.8	2.55	2.51	3.31	1.57	2.09	102.097	62.4184	80.2378	68.3498	51.2193	50.6903	39.3155	51.1485	39.3094	33.6589	36.7742	38.6663	34.9846	21.3986	28.6137
13681	Eif4a1	0.446429	47.35	39.62	31.99	24.55	28.25	27.16	27.52	27.78	37.07	32.07	32.76	30.92	26.54	17.37	17.35	322.216	269.704	282.468	263.293	159.766	168.006	147.269	126.308	132.638	106.229	121.479	77.1164	104.762	86.2216	85.8787
13682	Eif4a2	0.028597	22.24	20.75	16.99	13.02	17.78	11.9	13.37	16.99	18.03	15.24	16.33	15.08	14.16	10.19	11.21	68.9435	24.824	38.2472	51.3022	23.1008	49.6108	42.0994	34.3858	35.0111	33.0592	50.6066	61.9253	47.1539	20.0035	33.6941
192170	Eif4a3	0.668454	6.02	3.03	2.36	3.56	2.82	3.21	3.28	3.56	2.83	2.79	2.1	2.21	2.48	0	1.02	112.851	122.698	93.3832	81.0462	65.2782	58.1658	48.0081	50.1642	50.8227	43.7458	36.538	30.5623	32.3262	34.5843	29.8188
75705	Eif4b	0.85	8.91	7.83	6.92	4.14	4.21	3.4	2.74	2.78	3.1	3.02	2.7	3.66	2.5	2.17	3.09	119.795	121.638	98.8949	83.4455	72.8178	59.7864	52.4668	59.7741	46.5472	44.5555	38.4361	56.9544	41.6894	38.6278	29.5283
13684	Eif4e	0.00178731	4.02	2.44	2.01	2.23	2.24	2.63	2.51	2.66	3.25	3.26	4.39	3.01	2.66	2.04	1.4	47.782	31.202	40.7558	36.338	21.078	23.1418	16.5688	15.7347	17.5945	15.8081	16.5477	10.5608	12.4799	8.95011	12.1822
26987	Eif4e2	0.253546	0	0.06	0	0.03	0	0	0	0	0	0	0	0	0	0	0	40.5749	58.3324	35.8913	30.1109	39.2411	33.9925	27.749	35.4129	42.7174	35.0104	40.1626	27.7764	23.2884	28.0608	22.2578
13685	Eif4ebp1	-0.172224	0	0	0.42	0	0	0	0.56	0.38	0	0	0.77	0	0	0	0.81	50.819	62.9478	42.3917	37.3917	46.0308	45.7599	74.223	47.4478	31.923	31.9255	25.3594	50.2042	38.6088	56.0405	33.7191
13688	Eif4ebp2	0.185577	0	0	0	0.17	0	0	0	0	0	0	0	0	0	0	0	44.6061	58.543	40.3892	37.8707	45.594	24.1457	34.3375	26.2892	28.1513	26.8243	20.0482	33.6215	24.4168	25.7131	28.4862
108112	Eif4ebp3	0.309295	0	0	0	0	0	0	0	1.27	0	0	0	0	0	0	0	12.7954	8.39254	12.9614	13.1192	8.38185	13.9235	97.9714	85.3372	11.2519	9.09485	8.24444	12.0453	112.204	36.916	30.3003
74203	Eif4enif1	0.755487	0.06	0.04	0.02	0.03	0.02	0.03	0.03	0	0	0	0	0	0	0	0	20.9879	23.8956	29.7386	22.2675	19.112	11.724	10.8808	9.96377	13.1606	8.8243	7.58409	4.22066	4.46463	3.87901	4.5959
208643	Eif4g1	-0.792857	2.24	2.12	1.8	1.49	1.94	1.82	3.29	2.51	2.78	3.6	4.57	5.86	4.04	4.72	3.04	118.406	141.376	98.439	91.6256	98.2246	68.6451	56.7318	63.5145	67.8253	64.3642	58.0247	39.158	43.8561	63.4753	55.7505
13690	Eif4g2	0.554066	1.38	1.15	0.85	0.66	0.65	0.59	0.46	0.35	0.65	0.5	0.47	0.49	0.82	0.37	0.8	165.344	148.644	143.719	146.36	90.7358	90.0657	72.0859	76.2541	70.4988	54.6717	47.3881	51.5146	53.6476	36.4731	44.769
230861	Eif4g3	0.444447	0.17	0.14	0.21	0.15	0.12	0.55	0.11	0.18	0.22	0.22	0.3	0.22	0.1	0.09	0.23	4.49832	5.73094	4.20057	2.70277	5.28356	8.87445	7.8338	4.2229	6.51524	8.38525	5.90613	5.28474	1.45022	4.13456	3.26604
22384	Eif4h	0.0142857	4.7	3.77	3.87	3.59	3.78	3.81	3.06	2.52	7.32	4.24	5.08	4.58	6.56	1.93	2.57	172.196	192.05	149.605	139.024	129.99	111.553	97.8341	96.6111	89.1682	81.8834	69.3299	70.7811	69.5905	65.2123	45.7847
276770	Eif5a	0.139286	112.43	111.6	72.08	51.08	50.6	43.92	72.41	60.05	72.78	61.78	80.09	103.21	42.17	32	49.81	647.31	836.267	548.127	469.9	570.347	329.721	328.128	311.841	244.647	227.06	186.465	153.092	237.469	283.585	212.732
208691	Eif5a2	0.418718	16.64	0	0	0	0	0	0	0	0	0	0	0	0	0	0	2.93858	1.52685	3.1444	2.48916	1.57368	1.50166	0	0	0	0	0	0	0	0	0
226982	Eif5b	0.239286	1.48	1.54	1.11	0.82	1.02	1.04	1.14	0.98	1.34	1.44	1.98	1.21	0.73	0.5	0.6	44.6296	22.4763	40.4314	39.2191	15.2917	32.2374	22.794	21.9235	15.3896	12.5074	14.5798	12.3679	13.6631	7.73547	12.8221
16418	Eif6	-0.425	2.9	2.68	2.38	1.66	1.47	2.04	2	2.25	5.21	3.7	4.66	3.3	4.7	4.13	2.53	72.272	107.086	58.2092	55.4261	55.8638	38.0261	43.2946	59.0639	49.2806	41.7187	34.6638	36.2994	35.7957	40.8124	37.6398
380752	Eipr1	0.5355	0.2	0.12	0.15	0.48	0.1	0.08	0.1	0.15	0.16	0	0.17	0	0.07	0.07	0.07	13.2643	18.38	12.7356	10.788	11.8224	7.72878	6.06792	6.97748	6.09593	4.2501	4.63366	2.86993	6.02291	8.33035	5.58068
68626	Elac2	0.504022	0.25	0.4	0.14	0.13	0.1	0.17	0.07	0.06	0.15	0.07	0.11	0.12	0.08	0.29	0.09	20.1619	22.3398	14.0515	12.5749	12.3628	8.82568	7.09321	10.1413	8.98304	8.18928	8.73092	5.06753	9.02486	9.99286	7.09734
50701	Elane	0.90646	0	0.05	2.02	2.77	4.05	3.6	5.16	3.26	3.28	3.32	1.75	0	0	0	0	4.97893	24.2564	38.4165	62.4334	142.143	59.4862	78.3287	54.8766	34.1049	30.8162	15.3302	0	0	0	0
15568	Elavl1	0.292857	5.34	4.98	4.66	3.33	3.72	3.63	3.09	3.86	6.3	4.67	6.08	6.14	3.38	3.48	2.42	17.2026	16.4502	13.8394	11.8323	9.90083	8.36483	7.09196	6.37684	7.48402	5.52815	6.03917	5.83373	4.45979	4.36217	3.85962
69257	Elf2	0.645497	0.03	0.03	0.03	0	0	0.02	0	0	0	0	0	0	0	0	0	21.1943	19.3112	18.603	19.949	16.097	12.4055	12.2927	10.383	9.2369	10.9475	9.78496	7.22743	4.96603	2.51315	4.96253
13716	Ell	0.266234	0.02	0.02	0	0.07	0	0.03	0	0	0	0	0	0	0	0	0	11.7592	12.346	11.3078	12.626	18.0657	16.6163	14.9631	13.5861	9.89437	11.0192	11.2506	11.9461	9.59319	11.0771	20.0045
192657	Ell2	0.645879	0.08	0.03	0.01	0	0	0	0	0	0	0	0	0	0	0	0	51.0118	34.4593	53.789	45.1225	26.8687	28.7448	16.9291	12.2433	11.6604	9.0105	8.77436	8.76319	12.6903	7.51428	10.8962
140580	Elmo1	0.510113	0.06	0.04	0.08	0.08	0.21	0.13	0.11	0.08	0.16	0.13	0.23	0.04	0	0	0	2.14051	1.70231	1.56845	2.56974	1.86597	2.70241	0	2.60766	1.90836	2.37456	1.59106	0	0	0	0
140579	Elmo2	0.523606	0.02	0.02	0.04	0.02	0.04	0.03	0.03	0.01	0.11	0.07	0.08	0	0	0	0	8.44439	8.98002	7.11507	7.1515	9.14244	6.71295	5.86304	7.8263	8.14576	7.60365	5.9893	4.84499	3.35012	2.85802	2.66836
234683	Elmo3	0.240005	0	0	0	0	0	0	0	0	0.12	0	0.14	0.16	0.04	0.03	0.03	4.21873	4.36039	5.12229	5.14697	5.85977	5.84665	5.9181	6.73323	4.84595	4.67227	4.73117	7.72664	5.48287	6.39023	6.0636
244548	Elmod2	0.309295	0	0	0.02	0	0	0	0	0	0	0	0	0	0	0	0	3.18118	1.37318	2.98447	3.03529	1.56976	1.81405	1.89404	1.22241	1.82043	2.2818	2.2805	1.84252	1.7448	0	1.90034
238317	Elmsan1	0.319951	0	0.01	0.02	0	0	0	0	0	0	0	0	0	0	0	0	6.72635	8.31859	8.57667	9.33433	11.8001	8.58013	5.06229	4.80256	3.98769	3.5852	3.2256	2.244	2.19341	1.22049	1.6415
13717	Eln	0.694384	0	0	0	0	0	0	0	0	0	0.2	0.44	0.34	0	0	0	5.43021	7.60898	5.48542	5.37091	8.83776	6.73714	4.6888	22.1844	31.2487	55.473	57.7782	38.7994	18.7642	1.8923	0
27224	Eloa	-0.00732154	0.07	0.07	0.07	0	0.05	0.02	0.02	0.1	0.07	0.1	0.05	0.07	0.08	0	0.05	19.0591	16.7864	19.0496	17.9515	16.0178	12.8547	10.415	10.1805	11.6966	9.01986	8.62228	5.71741	6.29376	5.49945	5.45703
67673	Elob	-0.242857	3.29	3.83	3.2	2.77	2.1	3.08	2.49	3.86	4.47	3.75	4.6	4.86	1.8	1.74	2.97	243.256	287.666	248.014	229.48	244.006	192.208	171.874	162.591	200.175	146.022	179.271	149.194	173.391	205.655	163.25
54325	Elovl1	0.329158	0.05	0.04	0.03	0.05	0.11	0.04	0	0.02	0	0.05	0	0	0	0	0	35.3997	41.4092	31.7611	32.3831	30.8462	20.5444	19.4267	15.2472	15.0156	14.5977	19.7226	11.4345	23.9401	39.9566	27.2448
54326	Elovl2	0.879721	0	0	0	0	0	0	0.37	1.13	1.25	1.89	3.34	0.81	0.36	0.64	0.55	10.7613	11.5628	15.2397	21.3127	18.0023	21.8234	76.8928	156.922	120.799	198.045	155.007	307.067	81.3566	76.4732	55.5874
68801	Elovl5	0.907273	0	0	0	0	0	0	0	0.6	1.61	2.22	7.07	10.14	5.76	3.8	1.66	15.6699	11.9244	11.094	10.7309	9.52305	14.3419	27.0357	73.1833	54.1301	96.8018	106.345	218.652	76.9584	72.4723	44.0568
230233	Elp1	0.771905	0.56	0.45	0.38	0.38	0.38	0.36	0.38	0.37	0.37	0.32	0.41	0.27	0.23	0.12	0.07	10.7721	8.30364	7.76994	6.2263	4.54896	4.75268	3.49448	4.49272	4.23552	3.5715	3.1316	2.35333	2.45444	1.62975	1.5267
58523	Elp2	0.844366	0.28	0.28	0.17	0.14	0.23	0.22	0.18	0.21	0.17	0.13	0.12	0.07	0.04	0	0.05	23.9875	18.838	17.3896	15.9184	13.2903	12.4129	11.1877	10.5004	11.0659	10.6161	9.95972	9.40502	9.74254	7.88381	8.98094
74195	Elp3	0.809652	0.48	0.51	0.5	0.24	0.44	0.39	0.31	0.24	0.46	0.23	0.29	0.1	0.12	0	0.06	22.3161	19.7336	16.9719	14.6855	13.1639	11.5929	10.4778	11.2187	9.19213	8.97527	8.02647	8.0132	7.11629	8.22704	6.66673
77766	Elp4	0.689029	1.27	0.13	0.04	0.38	0.25	0	0	0.04	0	0.03	0	0	0	0	0	1.78875	1.46191	1.43451	1.49235	0	0	0	0	1.11518	1.04344	0	0	0	0	0
54351	Elp5	0.572937	0.53	0	0.12	0.31	0	0.42	0	0	0	0	0	0	0	0	0	27.4267	35.647	29.1823	20.3409	20.1818	16.0559	13.0445	13.399	10.7621	11.204	8.13907	10.0649	9.73634	15.786	9.47867
72341	Elp6	0.60248	0	0.07	0.13	0.09	0	0	0	0	0	0	0	0	0	0	0	5.14229	5.80447	4.43591	3.39379	2.39605	1.87919	2.38545	1.99138	2.36368	1.55775	1.34948	1.59435	1.90644	2.6037	1.80642
13723	Emb	0.479133	0	0	0.05	0.04	0	0.03	0	0	0	0	0	0	0	0	0	7.4133	6.3705	7.45112	8.71439	8.10366	5.7302	4.51503	7.82117	4.05016	2.87285	2.08037	0	0	0	0
230866	Emc1	-0.705988	0.32	0.26	0.15	0.17	0.17	0.22	0.42	0.3	0.49	0.88	1.81	0.84	1.16	0.61	1.05	9.01521	7.91718	7.99447	8.30596	6.39206	5.75587	4.33049	5.81039	4.90304	4.87302	5.22067	3.84165	4.68364	3.20196	3.21429
69683	Emc10	0.453921	0.03	0.03	0	0	0	0	0	0	0	0	0	0	0	0	0	55.7156	88.0752	56.8666	51.6657	57.4481	39.1841	36.5879	34.2225	36.6032	34.4464	30.62	42.2944	45.2138	59.4962	38.1955
66736	Emc2	-0.0878933	0.41	0.31	0.35	0.26	0.26	0.4	0.26	0.43	0.93	1.23	1.34	1.04	0.99	0.99	1.26	23.4055	8.39124	15.255	16.2423	7.10725	13.3467	12.1322	14.4082	9.82987	11.1454	12.1843	10.4986	16.8618	5.8135	11.6803
66087	Emc3	0.0107143	0.16	0.18	0.21	0.1	0.14	0.15	0.26	0.33	0.36	0.46	0.82	0.38	0.57	0.31	0.47	26.3808	24.2499	24.9508	24.0604	21.553	20.2402	16.5618	21.2348	22.9266	23.978	23.7919	24.1078	26.135	24.7496	20.8334
68032	Emc4	0.561216	0.74	0.24	0.36	0.25	0.28	0.32	0	0	0.86	0.77	1.14	0.7	1.63	0.53	1.17	20.7224	19.1923	15.8673	16.449	16.8866	15.53	18.4802	22.6611	20.3055	21.787	27.1416	21.5897	31.4625	31.971	28.7826
66048	Emc6	-0.207328	0.52	0.19	0.22	0.13	0	0	0.32	0.28	0.83	1.24	1.56	0.92	1.07	1.11	0.59	49.263	56.069	43.4154	42.6346	47.682	50.101	52.4112	59.2503	42.1604	41.6216	45.4629	41.1066	51.6002	57.3448	40.7383
73024	Emc7	0.29238	0.19	0.42	0.18	0.18	0.13	0.18	0.51	2.4	2.71	0.57	3.34	4.45	0	1.23	0	10.0337	9.61099	9.81628	9.71937	8.39449	9.13501	8.68055	9.23137	9.82866	9.09872	10.3924	11.9896	11.8733	10.0592	9.62275
18117	Emc8	-0.185714	1.35	0.73	0.62	0.32	0.65	0.76	0.5	0.45	1.13	0.86	1.21	1.16	1.07	1.2	0.74	12.1102	12.46	9.85268	7.98961	7.85309	8.145	5.63028	6.54326	6.7787	5.76935	6.13138	5.76282	6.11249	5.27334	5.86402
13726	Emd	0.818588	1.08	1.06	0.85	0.44	0.55	0.56	0.41	0.26	0.36	0.55	0.45	0.38	0.15	0.04	0.08	31.2334	34.5499	27.8785	28.1578	27.1058	18.2872	13.0475	16.9622	13.6484	13.6198	12.4855	10.2792	9.80616	9.03474	8.26032
14791	Emg1	0.840606	0.24	2.14	0.46	0.07	0.15	0	0	0.08	0.11	0	0	0	0	0	0	125.231	123.824	101.003	81.6674	70.6389	60.9155	50.7262	50.9177	51.3126	37.4621	40.6751	39.1415	40.3074	34.9269	33.3104
100952	Emilin1	0.432917	0.09	0.12	0.16	0.05	0.13	0.07	0.04	0.09	0.36	0.17	1.94	0.49	0.07	0.02	0.03	33.1165	28.3849	17.406	18.2145	22.5373	23.6979	24.373	14.9918	23.0745	23.832	25.7079	20.7928	9.4513	8.91841	6.65235
68519	Eml1	0.396942	0	0	0	0	0	0	0	0	0	0	0.09	0	0	0	0	1.89764	0	0	0	1.16962	0	0	0	0	2.11188	1.17348	0	0	0	0
72205	Eml2	-0.257603	0.11	0.28	0.17	0.17	0.38	0.36	0.52	0.52	0.89	1.62	0.75	1.65	0.55	1.43	0.35	8.15623	10.1434	6.121	4.93098	7.43051	5.69769	6.98051	6.73506	4.72983	5.77829	6.26705	6.53529	3.32064	4.53263	2.36798
225898	Eml3	-0.124898	0.02	0.01	0.12	0.17	0.02	0.01	0	0.01	0.07	0.03	0.02	0.01	0.05	0	0.1	12.8586	14.7042	10.0378	9.44434	12.0558	8.20086	8.34191	10.0064	7.77757	7.20694	5.41205	6.69027	7.40418	8.17978	6.56605
78798	Eml4	-0.0983021	0.41	0.25	0.5	0.5	0.4	1.22	0.99	2.88	2.95	0.95	5.84	0.44	1.38	4.16	0.61	8.09933	3.59085	5.39435	5.05067	2.69771	4.12657	4.3111	4.70147	4.86135	5.54257	4.6719	3.73188	2.43975	1.5933	1.89206
71946	Endod1	0.911685	0.13	0.16	0.15	0.19	0.18	0.14	0.04	0.01	0	0	0	0	0	0	0	20.1718	21.5014	26.7736	25.8629	21.0684	13.5718	8.95063	6.541	8.22676	3.47519	2.91277	0	0	0	0
13804	Endog	0.775	0.1	0.09	0.14	0.28	0.57	1.26	1.38	1.66	3.29	1.42	1.53	2.96	3.42	3.84	1.36	15.9253	26.0561	14.2793	18.5947	25.5687	32.8611	34.3099	30.9945	34.7576	33.4416	38.0038	30.3765	51.6913	66.6263	51.2045
13805	Eng	0.0790672	0.1	0.14	0.03	0.16	0.1	0.26	0.26	0.14	0.16	0.11	0.15	0.24	0.1	0.28	0.02	25.0139	27.3927	15.659	18.1046	22.7793	17.5844	25.5526	28.1182	26.5345	31.7672	30.1379	23.0221	26.5235	21.8638	16.989
217364	Engase	0.0799392	0.03	0.04	0.05	0.05	0.04	0.04	0.05	0.07	0.1	0.07	0.08	0.03	0.05	0	0.03	5.75117	8.50061	5.32516	5.53629	5.89914	3.66367	4.07358	4.97134	3.15349	3.41271	3.15767	2.47455	2.45959	2.42423	2.0562
13808	Eno3	-0.417857	35.76	15.08	18.84	16.7	12.54	21.07	19.22	25.61	50.06	40.71	43.7	43.77	55.08	53.9	69.52	6.629	5.81536	3.84542	4.18293	3.10863	4.55995	3.47705	4.41646	2.86197	3.46383	2.30263	4.43261	4.08977	2.24835	2.31892
67870	Enoph1	0.59857	0.23	0.13	0.15	0.15	0.12	0.07	0.04	0.1	0.33	0.11	0.13	0.2	0	0	0.1	14.3722	16.598	10.5987	9.3387	8.1324	6.22025	5.31253	5.36203	6.16678	5.99252	6.64208	5.13685	3.67755	1.72361	1.41741
13809	Enpep	0.892667	0	0	0.07	0.13	0.03	0.03	0.09	0.18	1.03	0.33	0.26	0.34	0.47	0.65	1.48	1.71559	0	1.99638	2.92126	2.62819	3.48414	3.64301	4.16208	5.68847	7.16895	6.17901	6.22532	5.97834	7.53531	7.9926
18605	Enpp1	0.896179	0	0	0	0	0	0.12	0	0.06	0.38	0.17	0.51	1.18	0.98	0.45	0.61	0	0	0	0	0	0	0	0	1.2314	1.72987	1.05474	2.51815	3.26743	1.2491	1.45106
209558	Enpp3	0.445699	0	0	0.02	0.06	0.06	0.06	0.02	0.05	0.04	0.07	0.16	0.04	0.06	0	0.1	0	1.45451	2.73787	3.41671	4.17871	1.82403	1.34811	2.63264	4.28703	9.3231	5.57827	18.006	5.95111	12.7421	16.6875
224794	Enpp4	-0.0208089	0	0.01	0.02	0.01	0	0	0.01	0	0	0.05	0.38	0	0	0.02	0.41	2.40204	1.86645	2.83435	2.74444	1.51291	1.78706	1.57931	2.8432	3.1658	3.18478	2.83112	3.53881	2.09326	1.53376	2.07863
56205	Ensa	0.747109	0.94	0.37	0.28	0	0.17	0	0	0	0	0	0	0	0	0	0	37.7349	35.5131	36.3488	33.0597	31.7886	27.8591	21.0786	22.8983	23.338	19.8415	18.4186	20.6324	20.8885	15.5433	14.1949
12495	Entpd1	0.791355	0	0	0	0	0.01	0.02	0.04	0.06	0.1	0.03	0.21	0	0.03	0	0	1.20153	1.16533	1.45345	2.06636	2.70146	2.44649	2.92749	4.67544	3.17564	3.52003	2.51824	1.60465	1.60093	1.07579	0
12499	Entpd5	0.856122	0.05	0.05	0.17	0.19	0.16	0.47	0.52	0.42	1.56	2.19	2.08	2.77	3.4	3.31	4.6	4.15198	4.64551	6.63388	7.57787	7.7782	7.49278	7.21943	17.1769	15.4707	23.0909	25.6142	28.6441	37.2689	30.0866	21.0321
223527	Eny2	0.316354	3.12	1.88	1.59	1.2	1.14	1.53	1.53	3.72	4.05	1.73	3.9	2.15	1.09	0	0.46	27.1011	17.5689	26.6453	26.4532	17.1777	24.8566	20.3928	20.66	20.0078	18.2762	23.6217	21.4289	24.6821	10.0766	16.3177
328572	Ep300	0.773237	0.01	0.01	0.01	0.01	0.01	0.01	0	0	0.01	0.01	0	0	0	0	0	9.26188	8.21762	10.1155	9.83959	7.52285	7.0898	4.83765	5.11245	4.86897	4.32099	3.45514	2.78912	2.32147	1.34985	2.02786
75560	Ep400	0.363137	0	0	0.01	0	0	0.01	0	0	0	0	0	0	0	0	0	11.5758	11.0518	11.2749	9.84386	9.72948	8.46389	6.99827	5.97923	5.6644	4.5169	3.70058	2.83224	2.73088	2.15617	2.26313
269587	Epb41	0.757143	1.12	0.83	1.09	0.82	0.68	0.67	0.57	0.63	0.97	0.51	0.64	0.6	0.65	0.38	0.52	54.4812	72.8386	78.9068	70.0185	56.0625	52.3087	37.0829	30.1426	42.3046	20.2089	8.9556	9.2739	8.8317	7.3302	13.8739
13821	Epb41l1	0.382015	0.04	0.05	0.09	0.06	0.08	0.09	0.07	0.24	0.29	0.22	0.19	0	0	0	0	1.88796	2.49387	2.07623	2.8961	2.04551	1.52504	0	1.36866	1.32668	1.90344	1.1612	0	0	0	0
13822	Epb41l2	0.679785	0.38	0.4	0.32	0.17	0.24	0.34	0.46	0.53	0.77	0.59	0.79	0.72	0.4	0.22	0.21	3.386	3.07479	2.58394	1.4215	1.75956	3.20235	3.19433	2.17269	2.89125	2.21252	5.59322	4.75321	1.931	0	0
13823	Epb41l3	0.559519	0.09	0.13	0.11	0.09	0.09	0.12	0.08	0.12	0.24	0.16	0.19	0	0	0	0	3.29744	1.50507	2.30723	2.5181	1.52694	1.38341	1.42215	2.18621	1.77519	2.26985	1.77774	1.20928	0	0	0
54357	Epb41l4b	0.371154	0	0	0	0	0	0	0	0	0	0	0	0	0	0	0.04	2.41433	3.39341	3.00448	3.09405	4.83679	6.52639	10.9101	8.53667	10.048	14.267	13.2376	16.9451	15.3167	25.5949	21.0766
226352	Epb41l5	0.45121	0	0.01	0.02	0.03	0.03	0.09	0.07	0.04	0.1	0.07	0.09	0.08	0.17	0.14	0.23	3.16509	3.46324	4.08655	5.42809	4.50865	6.54783	5.732	7.78848	6.74918	7.97392	8.78326	9.39854	7.69287	4.63212	4.48018
13828	Epb42	0.960314	1.08	0.74	1.16	0.94	0.73	0.88	0.49	0.38	0.22	0.17	0.09	0	0	0.03	0.03	58.067	47.1748	79.1384	93.7262	54.6188	45.5932	24.4506	13.6617	22.1321	7.60976	7.9968	0	0	0	0
105298	Epdr1	0.0707252	0	0.19	0.46	0.43	0.8	0.25	6.35	0.57	0.45	0.28	0.59	1.31	0.45	0	0.06	8.18133	8.9464	9.0534	6.81535	4.4241	3.18878	3.24281	2.88747	3.34012	2.48384	2.49696	1.55528	1.06591	0	0
100502841	Epg5	0.641946	0.01	0.02	0.02	0	0	0	0	0	0	0	0	0	0	0	0	3.62029	3.0948	3.21201	3.17592	2.67776	2.01017	1.66471	1.70983	1.84888	1.30789	1.10312	1.02207	1.41099	1.59963	1.38331
13846	Ephb4	0.554178	0.01	0.01	0.01	0.02	0.01	0.01	0	0	0.02	0.18	0.01	0	0	0	0	13.5689	16.2995	10.1109	10.8202	13.659	8.65258	9.37584	13.6598	14.7702	16.2808	11.5065	11.4258	9.99357	6.25297	4.1044
13849	Ephx1	0.925827	0	0	0.04	0.08	0.25	0.75	1.49	0.97	3.76	8.54	9.9	8.48	10.2	16.48	26.37	2.0593	4.01903	3.5041	5.06826	10.6069	11.3496	23.4114	85.1875	34.4995	84.6809	107.54	93.7312	133.387	188.958	89.6178
13850	Ephx2	0.885714	0.07	0.09	0.52	0.6	1.18	1.75	3.72	13.23	50.46	54.02	84.34	61.65	71.89	85.89	168.26	5.39733	6.88269	7.68424	9.45916	14.4939	20.271	36.7747	217.271	83.9945	141.379	139.914	252.905	126.002	260.387	159.063
77781	Epm2aip1	-0.122639	0.02	0.07	0.07	0.08	0.03	0.12	0.04	0	0.13	0.09	0	0	0.55	0	0.22	3.50333	2.42961	3.9899	3.85857	2.80637	3.46929	3.57733	3.07605	2.2097	2.44005	2.43309	2.40868	2.20798	1.27216	2.20613
13854	Epn1	-0.686942	0.23	0.22	0.29	0.14	0.14	0.19	0.23	0.27	0.56	0.47	0.38	0.96	0.74	0.65	1.09	104.962	150.094	113.209	100.828	113.486	78.5282	65.5379	66.3756	54.5387	50.9359	48.7912	47.2241	59.436	85.7711	56.1352
13855	Epn2	-0.287494	0	0	0	0	0	0	0	0.01	0	0	0	0	0	0	0	1.89474	1.86432	0	0	1.16539	0	0	0	2.18173	2.52819	3.23333	1.20149	1.63135	1.39748	0
107508	Eprs	-0.453571	2.91	2.39	2.38	2.01	2.11	2.52	2.46	2.85	4.55	3.82	4.37	5.89	3.73	3.27	2.77	51.6976	28.7186	40.6054	36.4981	19.6115	26.641	23.8094	22.7927	22.7733	21.563	22.0535	16.365	25.1746	14.9999	21.4208
13858	Eps15	0.467857	0.56	0.58	0.61	0.53	0.49	0.6	0.36	0.47	0.62	0.52	0.77	0.44	0.41	0.31	0.5	17.6539	10.7541	17.8816	18.1167	11.067	12.0181	9.46617	9.15687	9.46203	7.45666	6.14462	5.65201	4.18754	5.13024	4.33778
13859	Eps15l1	-0.28597	0.38	0.34	0.37	0.29	0.32	0.88	0.54	1.06	0.82	1.82	4.03	0.48	0.51	0.64	0.29	14.8975	13.3704	12.1506	11.9386	12.7127	9.62133	7.49023	7.51333	6.44384	6.08055	6.0333	4.58126	3.27122	3.13274	3.10456
98845	Eps8l2	0.613048	0	0	0.13	0.4	0.43	0.65	0.97	0.9	0.67	1.24	1.97	0.28	0.69	1.99	2.74	4.71849	5.88203	6.94756	14.1302	27.6948	26.6012	26.6066	27.0379	19.6242	19.1208	20.5705	42.2355	22.6534	51.6423	43.2518
57837	Eral1	0.633115	0.03	0.04	0	0	0.01	0	0	0	0	0	0	0	0	0	0	13.1712	17.1035	12.4632	10.1068	9.96818	8.38403	7.60054	8.14578	6.43795	7.38149	7.22565	7.33355	7.81002	7.65832	7.42445
80898	Erap1	0.85	0.13	0.17	0.26	0.25	0.31	0.53	0.83	0.7	1.76	3.06	3.29	4.01	2.8	1.82	1.79	4.12844	2.45749	4.44761	4.99427	3.104	4.15435	5.11825	8.2266	8.05707	10.7253	8.59959	10.8995	9.94319	4.61724	7.54541
59079	Erbin	-0.122527	0.03	0.07	0.01	0.02	0.04	0.06	0.01	0.03	0.09	0.06	0.05	0	0.01	0	0.06	7.22945	2.50261	6.20423	6.82934	3.10966	5.69626	5.30546	9.1952	5.88202	7.71157	6.2447	7.85926	5.72832	2.01914	5.05217
111173	Erc1	0.436266	0.07	0.14	0.01	0.03	0.02	0.03	0.04	0.09	0.1	0.1	0.19	0.25	0.28	0.36	0.24	1.87312	1.53956	1.47041	1.19973	1.03741	0	0	0	1.75068	1.38811	1.26377	1.11007	1.70901	1.74555	1.77901
13871	Ercc2	0.806858	0.05	0.03	0.03	0.15	0.01	0	0	0	0	0	0	0	0	0	0	15.9917	19.0415	10.9356	10.8839	10.5497	8.98418	8.06719	8.36637	5.94054	5.71716	5.38837	4.29637	4.95335	4.89592	3.7637
13872	Ercc3	0.774597	0.01	0.03	0.01	0.01	0	0	0	0	0	0	0	0	0	0	0	12.7384	13.1515	10.5541	8.32487	7.56772	4.97638	5.05967	7.55893	6.70152	6.66836	6.76954	5.15425	5.39875	7.0678	4.5641
50505	Ercc4	0.433013	0.01	0	0	0	0	0	0	0	0	0	0	0	0	0	0	3.65462	3.45517	3.53193	3.0638	2.08634	1.54258	2.11731	2.25883	2.40014	2.34714	1.79277	1.68993	1.99471	1.78674	1.85577
236930	Ercc6l	0.910754	0.28	0.22	0.14	0.12	0.1	0.05	0	0	0.02	0	0	0	0	0	0	7.28703	5.04504	7.9606	6.28855	3.97473	2.94809	1.78224	1.66351	2.54946	1.2722	1.08452	0	0	0	0
58520	Erg28	0.339178	0	0	0	0	0	0	0	0.94	0	5.44	0	1.25	1.57	0	0	33.6069	31.9086	30.2548	32.374	31.5899	35.4054	39.5949	27.1483	32.1913	34.5328	41.0773	48.4447	81.4944	31.7142	33.8709
67458	Ergic1	-0.282143	0.37	0.23	0.31	0.32	0.38	0.64	1.2	1.12	1.92	1.7	1.76	1.24	0.78	1	1.19	25.6959	30.0118	21.2474	21.7553	27.1142	18.8269	24.1142	15.9861	21.27	21.2832	22.928	13.4972	17.5457	36.6494	20.6804
67456	Ergic2	-0.177555	0	0.02	0.01	0.02	0	0	0.03	0.03	0.06	0.11	0.16	0.07	0.07	0	0.07	12.4265	6.91931	12.538	11.3807	6.79976	9.51445	10.9937	9.33702	7.93166	8.78069	7.57484	8.55894	7.01636	4.86651	6.29389
66366	Ergic3	-0.389098	0	0.11	0	0	0	0	0	0	0	0.59	0	0.32	0.31	0	0.22	68.4274	80.4559	61.9295	56.1005	67.061	55.3243	53.0283	53.3861	52.8167	48.1369	49.3683	54.8694	50.5687	72.1953	51.4663
13877	Erh	0.746429	14.69	7.21	5.51	11.14	9.98	11.75	5.83	6.34	14.78	6.01	5.8	5.35	2.59	3.13	2.37	144.652	132.716	132.239	104.199	68.8277	67.2928	51.9397	53.3604	54.9583	40.5708	47.3093	28.5773	29.008	23.1013	20.2546
67276	Eri1	0.692107	0.1	0.24	0.15	0	0.04	0	0	0	0	0	0	0	0	0	0	14.1241	10.8202	12.7315	12.5788	8.19571	7.30053	5.27001	4.96383	5.64749	3.91167	3.58325	2.20364	2.63083	1.11787	1.58829
66753	Erlec1	0.212912	0	0	0	0	0	0	0.03	0.04	0.03	0.14	0.77	0.47	1.24	0	1.1	5.88836	4.61664	7.05181	7.42398	5.32657	7.75029	7.06969	8.71044	7.34061	7.27927	7.16321	9.7489	6.78897	4.51087	5.22615
226144	Erlin1	0.317857	0.24	0.13	0.42	0.27	0.21	0.45	0.62	0.53	0.4	0.69	0.71	0.49	0.19	0	0.12	9.05687	6.94616	8.24031	10.1762	9.84423	9.69865	6.99639	8.39454	10.5651	12.4467	12.0973	9.53782	8.38899	9.73158	8.32295
244373	Erlin2	0.0392857	0.67	0.52	0.79	0.85	0.94	1.5	1.95	1.51	2.29	2.07	2.13	2.5	1.4	0.84	0.76	9.31084	10.0065	9.55589	8.45604	9.12905	8.13498	8.09321	7.72468	8.5809	10.362	7.8003	9.6038	5.30738	5.8171	3.6509
27028	Ermap	0.685505	0	0.11	0.09	0.05	0.05	0	0	0	0	0	0	0	0	0	0	140.656	112.651	180.667	141.379	121.277	98.3069	62.619	36.2432	33.3772	12.4193	9.83992	0	0	0	0
226090	Ermp1	-0.114799	0.11	0.14	0.14	0.08	0.1	0.07	0.06	0.1	0.11	0.17	0.3	0.38	0.38	0.12	0.17	7.48578	5.56534	7.79569	7.16733	6.2323	5.11548	3.15903	2.14965	3.26949	4.47834	3.63004	3.62797	3.28016	2.37948	1.80842
50527	Ero1l	-0.0928571	0.46	0.39	0.69	0.48	0.59	1.01	1.19	1.34	1.91	1.71	1.43	1.3	0.3	0.9	0.53	11.5115	6.82222	10.5375	11.0207	10.772	12.9758	10.1024	7.44708	7.44284	6.78423	5.25105	4.00069	3.47418	1.92437	2.6007
67475	Ero1lb	0.772278	0	0	0.02	0.01	0	0.07	0.07	0.03	0.52	0.27	0.68	0.13	0.23	0.21	0.42	0	0	0	1.02123	1.16853	2.03274	3.10192	3.07774	4.02516	3.48729	2.81495	3.54397	4.75017	12.7813	15.4496
67397	Erp29	-0.0821429	5.82	5.11	5.1	4.54	5.6	6.22	8.86	5.4	8.16	9.39	7.74	5.88	4.58	2.38	2.39	28.7744	32.9559	27.732	27.0364	25.7785	24.9698	20.1708	21.5757	18.0828	14.3828	14.524	12.3254	9.15204	14.9667	13.9473
76299	Erp44	0.753571	1.9	1.86	3.04	3.16	3.24	4.98	6.59	7.47	12.15	15.52	10.33	11.64	17.75	14.08	13.05	15.1619	12.2149	16.1865	17.4891	17.1582	19.1807	19.3164	19.0928	23.5443	21.3833	19.9029	19.2044	19.1909	18.2817	22.0838
74155	Errfi1	0.322329	0	0	0	0.02	0	0.05	0.13	0.24	0.1	0	0	0	0	0	0.12	7.46401	9.20556	12.3921	18.8024	24.3313	37.0656	47.4891	106.454	122.747	103.211	82.8216	105.985	197.435	111.561	275.363
69524	Esam	0.342321	0	0.01	0	0	0	0.14	0	0	0.1	0.23	0.08	0	0	0	0	10.9308	11.3824	7.60137	6.59298	8.54672	7.8546	9.38343	11.1072	10.4335	9.05721	9.51072	7.96575	6.51938	3.96304	3.12303
13885	Esd	0.632143	6.08	6.32	7.41	8.52	6.29	12.13	13.08	14.71	27.71	36.73	51.44	75.11	82.51	60.97	60.99	54.3875	51.1443	93.5317	50.8995	68.2071	46.3325	66.1873	63.9453	69.9907	130.601	94.9551	120.926	85.3509	78.3272	81.3541
66580	Esf1	0.541298	0.21	0.16	0.09	0.06	0.04	0.06	0.03	0.03	0	0	0	0	0	0	0	15.0783	4.31481	10.7814	12.0709	3.20807	9.20716	7.7842	8.03318	5.21526	4.98762	5.77056	6.93679	4.69457	1.62283	3.61772
77411	Esrp2	0.487521	0	0	0	0	0	0	0	0.03	0.05	0	0	0.09	0.07	0	0.07	5.61424	6.15593	7.25914	10.9453	16.5245	14.7407	19.7832	24.8884	18.2668	22.1551	26.646	22.2132	27.041	26.9688	23.6743
27886	Ess2	0.591608	0.03	0.1	0	0	0	0	0	0	0	0	0	0	0	0	0	7.93111	9.4124	6.15104	5.98306	5.83864	4.12721	4.18508	4.62398	3.82171	3.68719	3.10159	3.21895	2.73138	2.90701	2.03236
23943	Esyt1	-0.552279	0.31	0.45	0.33	0.17	0.42	0.72	0.47	0.53	0.46	0.64	1.07	0.99	0.33	1.02	0.58	12.5066	17.1412	12.3883	11.5855	16.0122	9.82472	9.08266	11.1306	9.70846	8.89803	6.76512	4.6257	4.5269	5.68597	5.37987
52635	Esyt2	0.394623	0.14	0.14	0.61	0.21	0.2	0.3	0.26	0.11	0.25	0.29	0.2	0.22	0.19	0.14	0.1	9.32725	6.81257	9.98961	9.68617	6.99086	7.9764	6.04073	4.46251	5.31079	4.12454	3.39924	4.15268	4.37788	1.81967	2.62923
225363	Etf1	0.496429	4.77	3.58	2.7	2.77	2.71	2.74	3.1	2.79	4.26	4.31	4.49	3.17	2.65	2.49	1.93	66.2085	37.3984	45.0826	36.2691	23.4578	22.0523	19.9361	23.7461	23.8557	24.8704	18.4052	21.3832	18.3248	9.03988	13.3048
110842	Etfa	0.821429	11.87	8.62	15.68	13	20.57	33.35	39.88	61.76	117.68	165.47	211.81	342.21	279.4	224.26	175.43	73.3843	64.284	96.4378	119.677	95.8611	129.369	135.167	149.165	168.974	251.132	250.129	315.798	255.285	107.503	140.42
110826	Etfb	0.896429	9.95	9.31	17.25	19.22	16.25	47.47	62.78	97.95	189.51	220.13	327.33	474.21	374.65	281.64	227.54	148.303	208.335	153.7	184.24	253.344	284.26	300.663	391.386	391.756	385.673	510.587	472.905	466.412	538.839	330.633
66841	Etfdh	0.896429	1.45	0.59	0.69	1.06	0.99	3.43	5.33	6.57	15.94	21.06	41.76	42.63	38.99	26.37	20.45	13.7916	8.68823	15.314	15.9504	11.9501	19.1896	26.5945	59.4504	42.3911	68.9578	65.0658	85.1	51.1228	27.7933	38.5966
67636	Etfrf1	0.574078	0	0	0	0	0	0	0	0	0	0.3	0	0.74	0.88	0.35	1.05	4.39489	2.83397	4.46557	5.79416	4.25259	8.14356	10.8692	10.3561	9.11094	11.1309	10.2061	14.969	16.2659	8.36053	9.76402
66071	Ethe1	0.669053	0.37	0.38	0.65	0.95	0.66	1.09	0.95	1.62	2.55	2.55	3.23	3.68	6.18	19.04	11.7	8.93167	14.5377	13.1045	15.1229	17.0819	13.6125	14.7841	9.22651	19.7276	17.2918	34.4712	10.4485	32.4333	76.4006	32.8936
208618	Etl4	-0.269547	0	0	0	0	0	0	0.07	0	0	0	0	0	0	0	0.1	1.9923	0	0	1.04753	0	1.17946	0	0	0	1.31435	0	1.20267	0	0	0
75320	Etnk1	0	0	0.01	0	0	0	0	0	0	0	0	0	0	0	0	0	10.3013	8.86148	10.5878	9.90752	7.67327	8.40031	9.45435	9.24208	8.97147	7.48714	5.56076	8.1055	6.66371	7.54506	9.74592
214253	Etnk2	0.694384	0	0	0	0	0	0	0	0	0	0	0	0	1.61	2	1.66	2.26138	3.46921	2.95677	5.26756	15.0326	17.4534	23.9349	19.6056	27.016	35.9908	39.4022	20.7115	94.539	118.322	49.6848
71760	Etnppl	0.794445	0	0	0	0	0	0	0.29	2.02	2.67	1.45	2.06	0.88	1.08	7.45	2.14	0	0	0	0	0	3.30115	9.00896	12.5835	26.5671	28.5461	32.4288	14.7637	38.0542	16.8318	9.15899
14011	Etv6	0.301841	0	0.01	0	0.02	0	0	0	0	0	0	0	0	0	0	0	4.31137	3.69683	3.55416	2.90199	2.64837	2.04839	2.65803	2.99671	2.72339	2.28071	2.12445	1.43802	1.30312	3.11176	3.42789
14020	Evi5	-0.0547577	0	0.09	0.09	0.02	0	0.09	0	0.28	0.09	0.24	0.55	0.12	0.09	0.18	0.2	4.52571	3.88659	5.53447	5.50232	3.20112	5.83212	3.85367	4.94346	4.74431	3.72336	4.87719	3.86729	6.18429	3.23307	2.63232
14026	Evl	0.211281	0.03	0.02	0.09	0.04	0.03	0.05	0.08	0.08	0.15	0.39	0.37	0.26	0	0.01	0	10.7783	10.2266	6.51873	7.37158	5.0482	6.85114	5.97172	7.89436	6.42838	4.02904	6.88198	5.51274	2.50438	1.83815	0
14030	Ewsr1	0.807143	3.65	3.52	2.77	2.48	2.24	2.38	1.99	2.73	2.89	1.52	1.91	1.86	1.6	0.96	0.76	153.397	98.3134	119.232	98.6321	79.0244	72.395	73.0025	62.3325	43.992	43.101	39.7039	44.1011	36.9533	19.9987	25.6347
69940	Exoc1	0.535107	0.91	0.45	0.05	0.02	0.1	0.25	0.06	0	0	0.02	0	0	0	0	0	6.1941	4.17825	5.41819	5.61617	3.23195	2.85248	2.92898	3.80669	3.54215	3.65287	3.09279	1.71821	1.85506	0	1.19788
66482	Exoc2	-0.240746	0.06	0.04	0.12	0.07	0.07	0.04	0.03	0.08	0.16	0.07	0.15	0.14	0.06	0.06	0.07	6.41404	6.45887	6.2434	6.32059	3.92416	4.11837	3.7618	3.90406	3.29557	3.50425	2.96213	2.24804	1.60727	1.42368	1.63818
211446	Exoc3	-0.122084	0.07	0.11	0.04	0.05	0.06	0.06	0.07	0.13	1.91	0.09	0	0	2.01	0	2.58	8.99066	9.04264	8.44599	6.90344	6.66363	4.7422	4.70416	4.26282	5.63051	5.16845	5.14011	3.59937	4.66901	5.11518	4.47944
74190	Exoc3l4	0.729492	0	0	0.03	0.03	0.05	0.02	0.02	0	0	0	0	0	0	0	0	5.75282	8.30865	6.11398	8.93032	11.9683	8.65356	7.57156	5.5709	6.01546	7.03197	6.0682	2.99682	0	0	0
20336	Exoc4	0.129148	0.09	0.08	0.06	0.07	0.1	0.05	0.06	0.04	0.12	0.13	0.09	0.07	0.04	0.02	0.31	5.33361	5.10975	6.81847	3.2903	3.97378	3.64174	2.71477	3.04894	2.8079	3.21257	2.42593	0	0	2.23988	1.93455
105504	Exoc5	0.599313	0.08	0.08	0.09	0.07	0.04	0.05	0.08	0.06	0.52	0.08	0.14	0.06	0.05	0	0.03	9.30277	4.41585	9.19273	7.94982	3.79889	5.28473	3.90498	5.79969	4.56928	4.38941	5.19837	3.13911	3.10282	0	2.46987
107371	Exoc6	0.640248	0.04	0.09	0.06	0.04	0.03	0.02	0.01	0.02	0.05	0.02	0.05	0.03	0	0	0.03	20.8776	12.3294	19.1213	18.0253	10.084	8.94872	6.93071	7.25175	9.0805	7.57384	6.63843	5.26978	4.59951	2.60398	2.82645
53413	Exoc7	0.0715565	0.16	0.7	0.21	0.16	0.06	0.76	0.05	0.07	0.15	0.19	0.22	0.45	0	0	0.08	9.62422	11.4636	7.88591	7.20817	8.3404	6.39168	6.11221	7.68578	7.87322	8.70095	7.67508	8.95906	8.06837	9.32447	6.42764
102058	Exoc8	0.185089	0.09	0.15	0.03	0.06	0.06	0.06	0.07	0.43	0.09	0.12	0.08	0.16	0.07	0.03	0.02	3.004	3.67497	3.35216	2.60863	2.43903	1.96826	1.78901	1.98806	1.77958	1.68767	1.41068	1.15106	1.10943	1.05127	0
208194	Exog	0.759492	0.02	0.18	0.01	0.06	0.07	0	0	0	0	0	0	0	0	0	0	3.49457	2.90633	2.8837	2.21453	2.00259	2.17448	1.54024	1.18782	1.74708	1.07211	1.28622	0	0	0	0
66583	Exosc1	0.737711	0.42	0.36	0.26	0.2	0.12	0.15	0	0	0.23	0.09	0.21	0	0	0	0	20.5766	17.1904	15.361	13.9315	9.82122	7.58364	6.94799	8.1672	7.10797	5.64863	6.38239	2.98859	5.85215	5.90554	6.18771
50912	Exosc10	0.894371	0.22	0.21	0.09	0.12	0.12	0.05	0.04	0.05	0.1	0.1	0.06	0.04	0.05	0.05	0	31.078	27.1407	22.2972	20.9995	18.5446	12.9176	10.6349	11.4867	13.7417	11.6825	11.4644	8.29558	9.08791	8.37857	7.86283
227715	Exosc2	0.709562	0.84	0.42	0.5	0.32	0.34	0.16	0.26	0.32	0.52	0.17	0.41	0.27	0.2	0.06	0.1	35.1591	33.4634	24.6097	24.5484	18.0845	15.0072	9.75706	11.9283	10.4046	8.45215	8.38619	6.0257	7.44561	5.30256	4.38319
66362	Exosc3	0.846881	0.37	0.64	0.22	0.17	0.25	0.1	0.26	0.05	0	0.06	0.13	0	0	0	0.04	56.2375	58.0651	46.9951	38.7983	28.1664	26.4097	24.8708	18.7078	18.135	13.6511	16.2638	12.6423	13.5879	13.2858	11.8584
109075	Exosc4	0.188343	1.33	0.91	0.9	0.71	0.64	0.71	0.38	0.58	0.92	0.58	0.81	0.59	0.58	0.33	0.18	20.5195	26.3591	17.0861	15.1253	15.7535	12.8196	12.9282	15.3408	12.0671	10.6267	13.2087	10.609	12.9713	21.0455	14.4115
27998	Exosc5	-0.0358425	0.53	0.49	0.34	0.23	0.31	0.18	0.2	0.11	0.63	0.27	0.37	0.83	0	0	0	38.4312	54.9868	32.5069	29.376	29.5901	20.2361	21.0373	28.3968	18.8191	13.1812	17.2915	13.7523	23.1908	32.8527	17.726
66446	Exosc7	0.552774	0.59	0.54	0.36	0.31	0.18	0.26	0.09	0.24	0.34	0.22	0.37	0.36	0.29	0.07	0.24	43.4825	34.0387	37.8876	29.9848	24.6405	24.936	20.6008	22.0511	21.4923	16.4701	24.3562	16.3508	21.7359	16.6444	12.7012
69639	Exosc8	0.636283	0.72	0.61	0.64	0.4	0.49	0.3	0.36	0.39	0.27	0.24	0.22	0.21	0	0	0.8	24.1992	16.6504	20.2032	15.5416	13.1018	10.6007	7.72976	7.88561	9.5727	5.59113	5.96065	5.16306	3.86062	2.98381	3.70085
50911	Exosc9	0.415027	0.37	0.42	0.65	0.41	0.28	0.2	0	0.15	0.8	0.53	0.29	0.13	0.2	0	0.16	27.9612	13.491	22.3146	19.9697	7.77673	12.1642	14.2125	11.962	9.48083	7.09124	8.68205	6.5632	7.35432	2.23953	6.02022
14050	Eya3	0.433013	0	0.04	0	0	0	0	0	0	0	0	0	0	0	0	0	12.4183	14.8835	11.7409	9.55214	8.83053	6.05705	4.94204	4.14562	5.55735	3.73557	3.57017	3.3724	2.4622	2.80211	2.35741
14056	Ezh2	0.823814	0.14	0.15	0.27	0.14	0.15	0.18	0	0	0	0	0	0	0	0	0	35.1756	20.2605	35.6096	30.3505	17.5913	20.8223	12.5486	12.3875	14.5156	8.15863	8.0697	3.32364	3.07784	0	1.16107
22350	Ezr	0.45	5.7	4.8	4.75	4.83	4.12	5.97	4.7	5.59	6.59	5.94	4.98	3.45	2.12	2.43	2.91	40.6166	53.2203	46.8912	37.8525	32.2602	22.4322	18.1033	18.1154	17.4032	11.2433	8.95109	3.91097	2.537	1.71932	2.78649
14058	F10	0.555559	0	0	0.44	0.1	0.39	0.15	0.37	0.28	0.31	0.76	0.74	0.66	1.02	0.29	0	34.6827	39.905	41.6914	75.69	107.981	146.599	199.698	237.461	288.494	298.504	310.586	279.682	252.673	314.784	213.138
109821	F11	0.501787	0	0	0	0.01	0	0.18	0.13	0	0.04	0	0.02	0	0	0	0	1.87957	3.72824	8.38703	16.4938	23.308	47.3886	58.2522	34.7305	56.2618	68.0781	61.3192	35.4948	26.0599	23.3005	30.5495
16456	F11r	0.621429	0.15	0.2	0.22	0.24	0.12	0.21	0.44	0.38	0.69	0.75	1.1	0.63	1.46	0.59	4.99	14.6174	12.8858	14.0136	19.1169	18.4598	24.3975	29.291	39.5276	35.887	40.6523	35.653	51.2212	27.8724	20.3356	23.1652
58992	F12	0.374689	0	0	0	0	0	0	0	0	0.04	0.04	0.06	0	0.05	0	0.11	37.9192	46.5325	45.1388	71.1514	121.156	134.613	208.835	282.63	266.243	282.496	242.731	303.816	321.189	421.871	271.053
74145	F13a1	0.711957	0.14	0.07	0.16	0.17	0.13	0.21	0.2	0.33	0.29	0.15	0.11	0	0	0	0	3.09482	1.97619	4.0609	5.54185	6.7298	4.56994	3.2292	3.5953	2.05878	1.47132	0	0	0	0	0
14060	F13b	0.061859	0	0	0	0	0	0	0.08	0	0	0	0	0	0	0	0	2.88326	2.42718	8.7885	13.7926	13.8383	30.0088	48.9487	64.7217	59.2527	81.8483	73.6458	90.4415	61.4389	32.7014	29.6629
14061	F2	0.792857	0.06	0.1	0.28	0.57	0.3	0.71	1.14	0.52	1.05	1.54	2.3	2.23	1.42	1.16	0.93	69.4051	77.7995	120.187	191.375	155.735	453.194	357.235	325.802	608.694	366.057	772.066	385.54	714.165	407.939	653.025
14067	F5	0.648395	0	0	0	0.01	0	0.01	0.01	0	0.03	0.04	0.02	0.02	0	0	0	4.36362	3.18193	6.93972	9.6033	8.65664	11.5288	13.6601	26.447	36.5324	58.744	40.3773	55.1036	34.1475	21.942	26.5802
14068	F7	0.061859	0	0	0	0	0	0	0	0	0	0	0.01	0	0	0	0	3.91632	6.79729	6.16633	8.80391	11.0612	12.7014	20.1491	32.4473	49.2789	55.4259	47.4997	50.2099	65.1539	82.8465	54.898
14070	F8a	-0.221407	0	0	0.03	0	0	0.03	0	0	0	0.08	0	0	0.04	0	0.06	2.13918	2.83843	1.96715	1.78226	2.38401	2.05484	2.80113	2.65879	2.84652	2.53684	2.35889	2.57852	2.65453	4.22305	2.5964
14071	F9	0.592798	0	0	0	0	0	0	0	0	0	0	0	0	0.1	0.37	0.06	0	0	1.06705	2.58611	1.87706	6.41524	9.84694	11.6083	14.2586	24.408	23.0777	29.7272	40.6095	24.0178	46.9375
14073	Faah	0.854335	0	0	0.03	0.06	0.11	0.31	0.51	0.36	1.01	3.37	2.77	4.3	4.93	2.31	4.99	2.37625	4.1847	3.30104	6.75917	8.1837	12.072	20.195	25.2934	21.8826	26.0563	30.1364	29.9768	34.8731	40.0582	21.9024
14080	Fabp1	0.867857	5.61	19.52	61.41	48.68	63.37	134.73	244.71	630.1	1502.31	2481.28	2712.77	3864.83	4946.76	8331.06	7597.82	57.228	63.0234	137.412	191.909	202.132	327.324	991.11	2954.69	1665.18	2285.03	2397.21	2950.33	1778.1	3809.09	1805.81
14079	Fabp2	0.692107	0	0	0	0	0	0	0	0	0	1.25	1.26	6.74	0	3.13	0	2.67782	2.1629	5.14747	4.20592	1.68955	2.04184	3.64245	37.41	23.0113	61.3658	65.3263	142.749	10.9936	19.2046	15.1766
11770	Fabp4	0.796429	0.82	0.57	3.35	3.13	4.37	7.78	24.01	27.92	33.93	40.56	45.21	48.61	21.68	13.73	7.12	13.4236	6.08366	12.624	16.3254	17.7272	35.5229	55.7792	42.6202	53.5931	56.8196	89.5005	57.952	16.1703	5.89546	10.7364
16592	Fabp5	0.810714	179.73	137.69	289	259.11	357.15	712.28	1354.26	1292.57	1889.36	2143.42	2152.82	1563.73	110.96	21.03	13.73	547.106	573.13	562.569	602.862	874.63	1165.37	1169.28	1013.56	1089.38	957.458	940.237	887.825	76.2283	156.028	159.312
14082	Fadd	0.275037	0	0.66	0	0.26	0.05	0.16	0.06	0	0.17	0	0.1	0	0	0	0	4.83404	5.98731	4.18255	3.82227	3.99476	2.66963	2.65101	2.49541	3.61863	3.81601	3.05495	2.95011	2.88295	2.94408	2.34839
76267	Fads1	0.901611	0.14	0.09	0.17	0.14	0.17	0.23	1.14	0.66	1.47	3.37	2.34	1.77	2.24	1.25	0.99	51.5541	53.2638	46.2426	57.4835	59.7011	66.461	84.4381	108.283	93.3146	154.227	149.037	182.189	129.997	101.395	87.985
56473	Fads2	0.849733	0.27	0.32	0.24	0.23	0.27	0.32	0.8	0.71	2.03	3.29	3.36	1.92	2.88	1.69	0.91	60.9385	72.7207	55.522	73.5754	79.4726	67.1581	108.035	185.13	193.009	363.804	275.028	289.195	142.935	144.753	91.149
328035	Fads6	0.421681	0	0	0	0	0	0	0	0	0	0	0.19	0.15	0.04	0	0.07	4.39101	5.51054	5.1562	9.27377	11.6751	8.63346	9.93557	8.47494	12.5	16.9633	17.0361	9.05507	15.367	16.6969	12.6674
14084	Faf1	0.348838	0.52	0.52	0.5	0.34	0.32	0.24	0.13	0.14	0.61	0.22	0.18	0.54	0.32	0.1	0.17	15.2679	13.8721	12.3697	12.1753	10.9062	8.1366	5.46572	6.54167	5.93636	5.09554	3.85865	3.59107	5.13129	5.53141	4.9207
76577	Faf2	0.0142857	0.18	0.19	0.28	0.26	0.21	0.29	0.33	0.57	1.14	1.09	0.97	1.2	1.02	0.58	0.7	10.7255	10.4586	9.3794	9.88852	11.0602	7.52053	9.62717	8.81466	11.5505	13.304	12.4156	9.44109	8.40667	8.90988	8.16935
14085	Fah	0.960714	0.32	0.39	3.12	3.31	8.35	16.22	35.64	49.88	75.58	92.9	110.45	220.65	256.82	198.4	181.12	14.8095	20.326	21.9992	54.0342	131.048	201.825	237.413	205.062	214.544	214.876	265.471	275.758	418.073	457.319	315.673
68636	Fahd1	0.596429	0.21	0.23	0.35	0.5	0.44	0.82	1.24	1.86	4.7	6	5.98	9.64	8.94	6.34	5.25	20.4565	17.8581	25.2212	27.6137	23.0865	35.3135	30.4887	37.8658	36.649	36.2432	49.814	34.246	34.6771	32.3996	21.7033
68126	Fahd2a	0.627346	0.02	0.05	0.11	0.08	0.11	0.17	0.23	0.24	0.68	1.04	2.04	4.01	3.36	2.79	3.81	7.19749	9.17028	7.42692	8.63289	9.73265	9.80022	5.82057	10.3904	12.0185	14.6942	11.2171	18.7177	16.1178	19.5481	7.41107
23873	Faim	0.591608	0.11	0.07	0	0	0	0	0	0	0	0	0	0	0	0	0	11.5458	10.0122	8.00964	6.08408	5.27367	5.201	4.60833	8.21328	6.99027	6.56616	6.98494	6.40763	7.73858	5.62728	5.946
66540	Fam107b	0.104604	0.28	0.17	0.08	0.32	0.23	0.19	0.48	0.23	0.43	0	1.44	0	0	0.07	0	10.1519	5.86757	7.6127	7.78916	9.2533	10.0765	8.54181	11.9555	13.5406	17.8485	19.6797	15.7171	16.643	3.60504	5.11005
68303	Fam114a1	0.593919	0.05	0.08	0.19	0.19	0.17	0.27	0.49	0.25	0.4	0.64	0.64	0.57	0.69	0.16	0.75	5.5092	5.03523	7.04999	6.66227	4.52255	6.25066	8.57313	4.77155	9.27124	11.8811	11.6057	12.2595	8.09896	6.45187	6.03822
67726	Fam114a2	0.503135	0.15	0.2	0.11	0.16	0.1	0.12	0.16	0.1	0.13	0.07	0.14	0.14	0.08	0.04	0.09	15.6422	12.3682	12.7707	11.9937	11.8977	13.2665	12.4789	11.1747	9.27182	8.99891	8.9937	11.6071	10.9913	11.5264	8.75401
215512	Fam117a	0.641286	0.04	0.04	0.02	0	0.02	0	0	0	0	0	0	0	0	0	0	51.7329	68.7667	75.9285	66.3297	60.41	56.193	40.426	33.0063	25.2304	12.655	13.8367	3.24593	2.10413	1.19277	0
109229	Fam118b	0.408529	0	0.02	0.02	0	0	0	0	0	0	0	0	0	0	0	0	5.86717	3.52142	3.39604	3.58612	3.17798	2.44003	1.67624	3.21607	3.22204	2.92614	3.15272	1.93342	2.02949	1.99857	1.98945
218236	Fam120a	-0.748883	0.34	0.29	0.27	0.25	0.3	0.33	0.34	0.39	0.93	0.74	0.96	1.49	1.15	0.94	0.66	57.3797	58.4883	59.5631	52.7453	44.3314	35.1909	27.463	30.0541	32.7994	33.8054	29.0814	27.9651	24.6718	19.5047	17.6392
84652	Fam126a	0.556413	0	0.01	0	0.05	0.02	0	0	0	0	0	0	0	0	0	0	14.1394	10.2188	14.4702	15.5553	9.99432	8.98543	6.22644	5.81498	6.05092	2.5668	2.10446	0	0	0	0
213056	Fam126b	-0.104561	0	0	0	0	0	0	0	0	0	0	0	0	0	0	0.02	0	0	0	0	0	1.45481	0	0	0	0	0	1.21337	0	0	0
63913	Fam129a	0.837719	0.01	0.02	0.16	0.13	0.26	0.59	0.96	1.31	0.85	0.79	0.76	0.24	0.06	0	0.02	0	1.28995	1.89277	2.54101	6.01771	7.12776	6.58697	3.81613	4.88965	4.1702	3.23816	2.05922	0	0	0
227737	Fam129b	0.4702	0.04	0.04	0.05	0.1	0.03	0.12	0.13	0.09	0.13	0.09	0.12	0	0	0	0	7.90255	9.8635	6.73334	8.18194	10.6739	9.8551	10.0115	4.63534	6.23629	7.01012	5.30987	5.22658	2.35125	1.84981	0
66488	Fam136a	-0.464286	0.66	0.42	0.33	0.47	0.69	1.86	1.92	1.89	3.4	2.93	2.99	5.28	4.92	4.3	4.37	34.7897	24.5266	24.1739	24.2969	15.1581	20.8302	22.021	20.066	21.2294	22.4374	24.6291	18.5034	23.3828	18.6161	16.8159
226252	Fam160b1	0.472696	0.05	0.03	0.05	0.06	0.07	0.1	0.19	0.15	0.3	0.13	0.25	0.17	0.15	0.11	0.17	5.80326	4.69111	5.3589	5.28623	5.83374	5.94674	6.7857	7.14537	7.24789	8.10906	6.30517	6.82723	4.8386	3.56563	4.51832
70186	Fam162a	-0.573727	0.89	0.85	0.85	1.39	1.09	1.54	1.22	1.74	2.83	1.98	3.75	2.33	3.27	5.28	2.12	99.0279	73.8869	84.7877	88.5747	91.5698	108.734	73.2973	66.8814	49.9627	39.3506	63.8484	41.1617	84.9299	60.2504	62.8667
68675	Fam172a	0.371154	0	0	0.21	0	0	0	0	0	0	0	0	0	0	0	0	5.74808	2.89667	4.32393	3.71626	2.79488	3.27434	2.26451	3.60484	3.00523	2.82776	2.24146	2.23887	1.9633	1.46515	1.43688
102122	Fam192a	0.829925	0.31	0.46	0.44	0.3	0.18	0.09	0.07	0	0	0.04	0	0	0	0	0.06	24.1487	26.0788	23.5142	20.6049	17.3049	16.4686	13.521	16.1784	11.7716	9.88576	10.1683	9.14412	10.0795	11.5454	10.3899
231128	Fam193a	0.433013	0	0.03	0	0	0	0	0	0	0	0	0	0	0	0	0	7.51107	7.55151	6.78362	6.95421	6.4405	4.9792	4.83048	4.17461	4.8016	4.95735	3.58284	4.20948	2.952	3.00997	2.69186
108707	Fam207a	0.594821	0.7	0.27	0	0	0.05	0	0	0	0	0	0	0	0	0	0	21.5533	26.4233	16.5413	14.5264	13.6819	9.69616	10.7802	11.5927	10.2301	8.40523	9.61083	7.73392	10.1845	17.4327	13.341
215015	Fam20b	0.322329	0	0.72	0.7	0.46	0.42	0	0	0	0.9	0	1.71	0	0	0	0	10.5217	9.8373	10.4899	9.92661	6.90528	6.1175	5.11155	5.54677	5.01916	4.75283	4.01922	2.99848	2.83233	2.21748	2.08469
80752	Fam20c	0.371154	0	0	0	0	0	0	0	0	0	0	0.01	0	0	0	0	4.84291	6.11984	4.99659	6.78082	10.0281	7.75697	11.1869	12.724	16.1576	15.1746	16.4229	12.9687	11.1305	16.8286	10.1273
67017	Fam210b	-0.385654	0.62	0.62	0.99	0.65	0.73	0.87	0	0	1.11	2.28	1.27	5.67	1.22	0	1.69	79.7283	94.7955	90.9687	86.7121	101.099	76.9451	64.8493	33.8772	45.5266	41.6858	35.2144	27.6366	24.0683	32.5054	19.1836
106581	Fam234a	0.734667	0	0	0.01	0	0	0.02	0	0.09	0.23	0.16	0.26	0.77	0.32	0.31	0.83	7.12294	10.3379	7.42283	9.08916	12.6425	10.414	12.1469	16.659	15.5924	20.6614	17.8468	17.7255	15.5963	25.2933	16.1338
70617	Fam241a	0.719608	0.06	0.09	0.12	0.11	0	0	0	0	0	0	0	0	0	0	0	45.5073	45.9065	58.159	54.2473	50.1666	42.19	24.3196	17.0002	16.8762	7.29587	6.61017	3.41448	2.39064	1.81811	2.50696
69134	Fam25c	0.377964	0	0	0	0	0	0	0	0	0	0	0	0	0	0	0.23	0	0	0	0	0	1.04651	1.49468	3.51248	8.67402	11.3688	19.0352	9.73412	15.9412	131.677	109.516
67922	Fam32a	0.436543	0	0.45	0	0.29	0.27	0	0	0	0	0	0	0	0	0	0	36.9878	36.5335	39.7874	31.8066	25.2371	26.5165	20.6056	22.5618	20.9541	17.0319	17.6882	14.4093	21.1191	18.1608	19.8808
66294	Fam3a	-0.123718	0	0	0	0	0	0.03	0	0	0	0	0	0	0	0	0	5.58014	7.22362	6.07614	6.34654	9.47799	7.20899	8.67869	7.42107	7.43524	7.05961	9.34623	8.27032	10.1016	8.34113	6.36642
27999	Fam3c	0.75782	0.12	0.47	0.41	0.27	0.32	0.47	0.99	0.67	0.51	0.91	0.43	1.17	0.42	0	0.3	8.04134	4.87392	6.85913	6.79239	5.42805	11.0093	14.9344	12.5902	11.1584	10.8125	8.56804	14.4731	8.15731	5.5747	4.99482
67894	Fam45a	0.0899304	0.1	0.05	0.08	0.07	0.1	0.12	0.08	0.07	0.28	0.17	0.39	0.28	0.17	0.07	0.16	6.2031	3.21151	6.96391	7.4612	3.3765	6.03907	5.31203	4.07482	5.00849	4.20109	5.1344	3.5518	5.48187	3.47584	4.24672
76820	Fam49a	0.546324	0	0	0.22	0.02	0	0	0	0.02	0.08	0.1	0.15	0	0	0	0	0	0	0	0	0	0	1.15675	1.33953	1.429	1.75411	1.1357	0	0	0	0
223601	Fam49b	0.5916	2.17	0.43	0.63	1.45	0.73	1.67	1.45	0.8	1.36	0.98	1.43	0.64	0.52	0.24	0.53	17.6755	7.9782	15.2008	11.7274	10.0832	9.53552	8.2167	11.6588	8.49417	7.37252	5.58763	4.2204	3.03653	0	1.75625
108160	Fam50a	0.837872	6.13	7.55	12.19	8.18	6.93	3.17	0	0	0.09	0.19	0.16	0	0.08	0.02	0	28.0429	25.608	27.4653	22.0914	20.2784	17.7068	14.7838	13.3017	16.8318	14.3092	14.8476	14.7219	13.4777	10.6615	10.1543
72826	Fam76b	0.433013	0.05	0	0	0	0	0	0	0	0	0	0	0	0	0	0	8.09292	4.09895	7.65699	7.80773	3.74927	5.42005	4.70058	4.87493	3.91245	3.96149	3.17432	3.87225	2.43219	0	1.66316
105732	Fam83h	0.590795	0	0	0	0	0	0	0	0	0	0	0	0.03	0.02	0	0.02	1.24022	1.53961	1.2169	1.18095	1.86966	2.45804	2.85874	2.58666	1.99561	2.6451	2.40293	3.84914	3.4185	3.50893	2.82951
97863	Fam8a1	0.371154	0	0	0	0	0	0	0	0	0	0	0	0	0	0	1.18	8.82988	6.7895	8.6501	8.93735	6.71111	8.64864	7.12663	7.94922	9.03964	10.82	10.3677	12.9947	11.0774	7.93289	11.7477
210998	Fam91a1	0.308523	0.11	0.04	0.03	0.04	0.13	0.05	0.01	0.14	0.05	0.07	0.11	0.08	0.13	0.02	0.14	9.8049	6.00073	7.35292	8.14565	6.7584	6.84233	6.94112	8.61605	8.23463	9.09346	6.94969	11.1063	9.22546	5.63072	6.50101
72722	Fam98a	-0.631486	0.27	0.32	0.24	0.25	0.24	0.28	0.29	0.35	0.45	0.39	0.44	0.56	0.39	0.4	0.38	19.4649	18.2061	17.4136	14.7436	11.265	8.87594	7.7943	8.3214	9.23668	8.26433	8.85628	6.37471	5.83712	5.8576	7.4196
68215	Fam98b	-0.196429	0.52	0.39	0.27	0.19	0.21	0.2	0.3	0.47	0.63	0.33	1.03	0.82	0.48	0.42	0.34	18.5845	17.9906	15.2847	13.9429	9.20059	9.59892	7.08373	7.80564	9.89513	9.01375	8.61216	7.7853	6.07639	6.12314	5.16489
73833	Fam98c	0.048903	0	0	0	0	0	0	0	0	0.06	0	0.12	0	0.39	0.07	0.33	6.32548	6.76611	4.66423	4.55099	4.93417	4.22425	6.21736	10.9377	4.57657	3.28103	5.19132	7.88803	5.99217	7.36375	6.10594
211651	Fancd2	0.507469	0.02	0.03	0	0	0.01	0	0	0	0	0	0	0	0	0	0	5.67485	4.431	5.72712	4.51117	3.60981	3.16986	1.85367	2.13131	2.40513	1.43551	1.22867	0	0	0	0
208836	Fanci	0.875943	0.04	0.07	0.07	0.04	0.03	0.01	0	0	0	0	0	0	0	0	0	5.69794	3.69886	5.56428	4.5604	2.69002	2.34183	1.35885	0	2.1163	1.53468	1.33256	0	0	0	0
67420	Far1	0.544337	0.03	0.04	0.04	0	0	0	0	0	0	0	0	0	0	0	0	4.61519	3.46729	6.6464	7.21768	3.03538	2.77153	3.91352	2.51589	2.90366	2.29204	0	0	0	0	0
223254	Farp1	0.241503	0.57	0.21	0.65	0.1	0.5	0.2	0.08	0.22	0.58	0.15	0.48	0.33	0.21	0.1	0.4	7.36144	6.60569	5.04741	4.20561	4.52065	4.18051	3.87221	3.74337	5.04998	6.07408	5.31789	5.35603	2.02819	5.59661	6.22072
227377	Farp2	0.407064	0	0	0	0	0	0	0	0	0.1	0	0.03	0.04	0	0.02	0.08	0	0	0	0	1.04794	1.28957	0	3.0531	2.66729	2.71489	1.94279	2.73149	3.24533	3.30084	1.90364
69955	Fars2	-0.101274	0	0.02	0.02	0.02	0	0	0	0.08	0.09	0.11	0.31	0.32	0.24	0.17	0.18	10.3417	12.0434	9.44305	9.93808	9.77631	7.42234	16.2697	9.48811	8.97882	10.2038	8.28781	9.82869	12.4088	14.8424	8.67454
66590	Farsa	-0.0589813	2.53	2.51	1.9	1.95	2.06	1.65	1.73	1.41	2.63	2.29	2.29	2.09	2.24	1.66	2.31	61.0819	68.1017	52.8978	40.148	43.6386	28.7145	20.7783	22.0911	19.5899	14.8546	14.3908	11.2171	11.7583	15.0691	11.5151
23874	Farsb	-0.18588	3	3.17	2.26	2.08	2.25	2.15	1.99	1.79	2.97	2.63	2.97	3.06	3.28	2.32	2.89	51.528	42.4773	45.0741	33.8514	24.3288	21.7775	17.2178	13.5452	16.433	12.4997	12.8433	8.24818	12.8051	11.8932	11.6018
14102	Fas	0.514972	0	0	0	0	0	0	0	0.1	0	0.12	0.11	0	0	0	0	0	0	0	1.48408	1.79492	4.00029	6.04763	8.20551	10.1838	13.4347	14.1632	16.587	7.71301	7.46615	11.3889
14104	Fasn	0.605898	3.89	3.43	3.7	4.07	4.03	6.32	10.41	6.91	5.59	3.7	1.84	1.64	26.21	42.11	28.85	28.8149	32.5109	18.9295	21.6618	26.2477	30.3206	45.0545	8.75026	8.83071	9.5724	6.77846	4.51551	39.1076	62.3568	26.5902
75619	Fastkd2	0.4143	0.01	0.04	0.01	0	0	0	0	0	0.08	0.01	0.05	0	0.03	0	0	5.49623	3.2996	4.2825	3.9999	1.99007	3.0508	2.0182	2.49956	2.88843	2.3944	2.34143	2.23425	3.01372	1.63112	1.76683
380601	Fastkd5	0.682867	0.01	0.02	0.01	0	0	0	0	0	0	0	0	0	0	0	0	5.64967	5.21299	5.8774	4.69306	3.58185	3.39398	2.9662	3.63209	3.29585	3.71957	3.59467	2.3822	2.03746	2.41452	2.09413
14109	Fau	-0.0571939	14.68	25.2	8.04	8.21	10.73	6.13	10.57	12.36	10.14	0	18.35	15.09	34.19	0	26.38	1169.97	1464.12	1123.48	938.741	1067.58	884.284	880.801	1089.94	685.998	483.468	513.813	450.593	630.878	528.359	373.062
14114	Fbln1	0.234874	0.27	0.24	0.12	0.09	0.12	0.23	0.33	0.34	0.27	0.25	0.25	0.16	0.03	0	0.07	12.1062	10.4208	4.97369	3.61643	4.42638	1.96262	0	1.50622	2.06352	2.07343	1.81213	1.36549	0	0	0
14115	Fbln2	0.46414	0.04	0.01	0.01	0.01	0	0	0.04	0.04	0.05	0.1	0.11	0	0	0	0	3.94816	3.41861	2.04519	2.44667	1.6265	0	0	2.07864	2.09568	3.10549	1.66568	2.35341	1.2193	0	0
23876	Fbln5	0.51025	0	0	0	0	0	0	0	0	0	0	0.54	0.44	0	0	0	0	0	1.10897	0	1.10689	1.14157	1.98963	2.31406	2.37486	3.60825	3.10884	2.46825	2.05198	0	0
14118	Fbn1	0.75416	0.04	0.01	0	0.01	0	0.01	0.02	0.03	0.25	0.12	0.31	0.48	0.01	0	0	1.86157	1.51524	1.02171	1.08999	1.28844	0	1.21727	1.67947	2.70706	3.70485	2.13641	1.37366	0	0	0
14121	Fbp1	0.861484	0	0	1.14	0.44	4.99	32.6	76.41	137.74	292.56	456.47	467.71	516.88	392.69	410.3	284.63	5.13314	2.90447	3.28426	8.78431	55.2499	287.561	514.78	749.973	1043.13	1021.01	1144.13	696.901	453.243	529.452	388.71
231670	Fbxo21	0.449307	0	0	0	0	0	0	0	0.06	0.08	0.01	0	0	0	0	0	12.5321	13.1146	9.03067	9.31083	10.658	7.8582	10.6315	26.1124	14.2319	21.5323	16.1433	44.6931	22.4041	13.9465	8.85098
71999	Fbxo22	0.266309	0.07	0.1	0.05	0.11	0.1	0.19	0.18	0.17	0.24	0.21	0.29	0.34	0.15	0.16	0.4	17.8356	13.8844	13.8851	11.9461	10.8019	12.568	14.3484	18.6116	19.1686	18.2837	17.3285	16.9117	20.7928	19.4182	17.8317
57443	Fbxo3	0.297493	0.2	0.14	0.1	0	0.04	0.11	0	0.16	0.04	0.15	0.2	0.31	0.25	0.16	0.19	17.0719	10.6083	17.2675	16.8259	11.4035	12.9734	10.4758	11.8629	12.6571	17.7597	14.8182	21.5833	16.8998	9.04253	8.72904
71865	Fbxo30	0.751124	0.1	0.1	0.08	0.07	0.04	0.04	0	0	0	0	0	0	0	0	0	12.1085	7.152	13.2174	14.5009	9.62208	14.1075	8.82149	4.04515	4.52949	2.69625	2.15542	1.52416	1.03935	0	1.09083
107035	Fbxo38	0.540062	0.01	0.01	0	0	0.01	0	0	0	0	0	0	0	0	0	0	8.35408	6.90502	7.85028	7.6413	6.11524	5.71425	4.7418	5.39641	4.81041	5.18032	3.80848	3.82459	3.56901	2.68263	2.50375
106052	Fbxo4	0.433013	0	0	0	0	0	0	0	0	0	0	0	0	0	0.07	0	1.93753	1.27949	1.6783	1.76118	1.38414	2.42541	2.20707	5.06221	3.87963	4.31881	4.69651	4.76301	6.10224	6.21173	5.61827
67141	Fbxo5	0.368575	0.02	0.01	0	0	0	0	0	0	0	0	0	0	0	0	0	42.015	27.0499	51.4031	45.0871	21.8653	29.6334	13.1448	11.3056	12.7717	6.99882	8.32258	2.23767	1.53739	0	0
50762	Fbxo6	0.747778	0	0.05	0.02	0	0	0	0.1	0.2	0.23	0.36	0.44	0.24	0.31	0.32	0.4	11.218	12.4545	6.73325	4.54284	7.12998	5.21052	11.3497	14.722	12.3242	9.53631	13.2226	12.5644	16.3836	33.1527	29.5755
231672	Fbxw8	0.661438	0.11	0.1	0.25	0.02	0.06	0.01	0	0.01	0.01	0	0	0	0	0	0	18.5211	26.3559	15.5099	13.6251	16.4446	10.1916	9.8711	11.4834	11.6643	12.5706	12.936	7.73761	9.3366	15.6362	10.4498
68628	Fbxw9	0.433013	0	0	0	0	0	0	0	0	0	0	0	0.08	0	0	0	6.36784	6.6704	6.37481	7.58311	8.02412	6.11434	6.17938	12.7122	15.8096	17.4412	16.7546	20.091	15.506	16.2493	10.7552
14127	Fcer1g	0.613991	0	0	1.16	1.22	0	0	3.09	2.89	4.08	2.96	4.76	0	0	0	0	24.1792	23.7834	29.8676	39.6638	46.8351	57.2839	66.1447	69.5369	48.6142	48.425	43.0071	30.729	21.3314	14.3661	14.3394
14130	Fcgr2b	0.738524	0	0	0	0	0	0	0	0.11	0.14	0.19	1.12	1.03	1.3	0.46	0.66	0	0	1.41949	2.17996	2.05047	5.6073	8.23938	12.9686	12.6206	9.50897	16.2464	9.77667	11.4079	4.54111	8.73512
14132	Fcgrt	0.775	0	0.08	0.23	0.12	0.18	0.3	0.49	0.72	1.4	1.34	1.72	1.44	1.53	0.35	0.68	18.0558	28.6916	21.9361	27.8497	44.0306	44.4908	83.4998	122.724	92.8447	107.845	105.612	136.341	83.8992	122.84	64.8039
218503	Fcho2	-0.116488	0.02	0.01	0	0.03	0.03	0.05	0.1	0.08	0.06	0.11	0.13	0.13	0.08	0	0.07	7.22288	3.28398	8.92846	10.2236	4.9275	9.19731	6.55624	4.7296	4.14192	4.52198	4.52729	4.02637	3.37251	0	2.83093
207278	Fchsd2	0.408529	0	0	0	0	0	0	0	0	0.01	0	0.01	0	0	0	0	2.92107	2.41422	2.9678	3.06211	2.35745	1.65185	3.78317	3.98899	4.61009	5.19331	4.44696	4.69981	2.30835	0	2.57531
14133	Fcna	0.112327	0	0	0.11	0	0	0	0	0.06	0.05	0	0	0	0	0	0	18.1683	17.5558	19.7049	29.9012	47.2455	42.3566	71.4162	62.6881	51.3949	58.2713	58.3165	24.5873	29.1631	39.3849	28.81
14134	Fcnb	0.312094	0	0	0	0	0	0	0.04	0	0	0	0	0	0	0	0	2.89683	3.70532	10.4776	18.4698	42.3786	31.161	23.2034	21.6701	12.2057	14.2751	6.75617	0	0	0	0
234730	Fcsk	-0.176584	0.03	0.01	0.01	0.02	0.02	0.02	0.04	0.05	0.08	0.04	0.11	0.15	0.06	0.04	0.11	4.3559	3.65683	2.76323	2.73717	3.42323	2.54715	2.13031	2.53067	2.84789	2.9359	3.10708	2.32897	2.80081	4.18166	3.16144
14137	Fdft1	0.615386	0.26	0.22	0.52	0.55	0.59	1.04	1.29	0.33	0.32	0.24	0	0	1.23	0.34	0.26	33.6721	40.2708	39.7151	45.0409	54.6502	60.9644	67.3094	32.3251	25.8506	31.082	35.6344	34.8081	124.893	30.5005	42.1226
110196	Fdps	0.303571	3.85	3.49	8.74	6.7	13.25	17.34	21.68	18.2	17.46	6.82	1.77	0.59	13.41	15.39	10.07	145.708	190.055	156.425	177.711	217.993	235.626	281.237	37.2688	41.0461	46.5274	52.837	16.1827	431.126	176.474	254.441
14148	Fdx1	0.763531	0	0	0	0	1.79	0	3.44	4.09	3.42	0	4.45	12.02	16.75	16.87	16.61	11.5368	12.3181	15.9727	14.3957	19	61.8668	50.8779	38.7501	38.0755	49.535	61.6818	74.8354	95.5633	99.1951	61.2662
68165	Fdx2	-0.270605	0	0	0.01	0	0	0	0	0	0	0	0.18	0.16	0	0	0	29.773	34.603	24.6467	21.0264	20.3608	17.6817	15.8375	19.8425	16.7894	11.7813	16.7788	13.8431	17.2993	25.02	16.9427
14149	Fdxr	-0.464286	0.33	0.47	0.64	0.6	0.96	1.23	1.22	1.17	1.9	1.44	1.4	1.32	0.83	0.75	1.03	14.7325	20.7053	17.8324	21.9748	23.284	19.5676	15.5816	14.2301	12.3851	9.33682	13.8996	7.40385	9.33733	11.8999	9.09277
14151	Fech	0.439286	5.77	5.43	5.79	4.64	4	4.1	2.46	1.29	1.81	2.45	3.24	2.87	3.27	3.88	4.5	234.61	257.559	283.664	285.919	331.463	197.719	128.661	79.3872	94.7286	52.2832	39.948	35.8977	33.3745	29.8049	27.0309
14155	Fem1b	0.713784	0.04	0.04	0	0.02	0.03	0	0	0	0	0	0	0	0	0	0	15.9544	14.7204	14.5484	12.1466	9.83387	8.0838	5.92355	4.87298	4.9833	4.53941	3.6385	2.43444	2.5105	1.9259	1.50206
14156	Fen1	0.964164	3.91	2.95	3.78	3.17	2.48	2.07	1.33	1.08	1.37	1.05	0.64	0.32	0	0	0	89.8689	104.723	89.7267	67.5023	66.1403	45.5503	28.2604	21.6876	28.5046	14.0759	15.4917	3.94916	6.97032	2.59952	1.69189
218952	Fermt2	0.892857	0.26	0.22	0.29	0.24	0.3	0.63	0.77	1.18	2.07	2.54	7.88	4.56	2.3	1.38	1.48	13.5799	7.92501	10.468	12.5161	11.8859	14.9116	14.2141	20.9915	28.7613	41.3846	31.3358	43.0369	31.8805	23.3085	52.7486
108101	Fermt3	0.646429	1.98	1.81	1.79	1.63	1.7	1.83	1.97	1.85	2	1.58	1.5	0.43	0.08	0.07	0.09	75.7413	89.5036	58.3001	60.4063	90.2239	44.3333	40.4575	40.2902	27.9695	17.3916	13.5765	3.95743	3.3931	3.29726	2.66589
59083	Fetub	0.893482	0	0	0	0	0	0	0.22	0.32	0.39	0.33	0.65	0.9	0.73	0.45	0.45	2.97277	1.84105	2.01254	4.53057	12.9265	48.3329	195.333	358.452	216.435	235.619	251.806	358.541	459.536	395.56	261.388
[truncated: 4,327 more rows]

## Sheet: Sheet2
Gene.ID	GeneSymbol	R_TF_cor	E12.5_R	E13.5_R	E14.5_R	E15.5_R	E16.5_R	E17.5_R	E18.5_R	D1_R	D3_R	D5_R	W1_R	W2_R	W3_R	W6_R	W8_R	E12.5_TF	E13.5_TF	E14.5_TF	E15.5_TF	E16.5_TF	E17.5_TF	E18.5_TF	D1_TF	D3_TF	D5_TF	W1_TF	W2_TF	W3_TF	W6_TF	W8_TF
108899	2700081O15Rik	0.4334	14.4343	13.8538	8.93565	8.09991	6.03372	5.8208	5.46249	3.79181	4.76963	4.03883	3.47233	2.57385	1.43696	0	0	4.58	0	0	0	0	0	0	0	0	0	0	0	0	0	0
11538	Adnp	0.490153	23.0034	15.5448	19.356	17.8157	13.499	13.8009	9.44344	10.3177	10.7361	11.8978	9.5333	10.9251	6.08391	3.68496	4.26987	1.53	1.51	0	0	0	0	0	0	0	1.09	0	0	0	0	0
226747	Ahctf1	-0.114388	17.0868	12.5881	16.9082	16.4436	9.5857	10.332	6.03881	11.1058	9.96072	7.68433	5.42082	8.56354	8.48838	2.52231	3.41319	373.17	99.42	40.32	10.22	7.78	7.78	8.94	10.85	87.92	51.73	61.19	161.58	243.58	231.43	94.7
93760	Arid1a	-0.103571	21.3442	21.0136	19.4767	16.2055	16.8623	12.1004	10.1531	12.4008	9.85488	9.19279	7.0838	6.14139	5.69269	3.90467	4.01347	19.03	12.53	11.73	9.46	9.45	10.27	4.84	2.93	11	15.37	11.04	13.32	16.71	16.38	7.88
239985	Arid1b	-0.711404	2.98954	2.5764	2.78125	2.45047	2.82531	1.71886	2.1568	1.18281	2.09631	2.14444	0	0	0	1.54505	0	0	0	0	0	0	0	0	0	1.54	3.26	2.1	6.26	6.54	6.34	2.87
77044	Arid2	-0.359571	6.71561	4.85077	6.70335	6.02214	3.61815	4.84999	2.77269	3.99673	3.19979	2.34379	1.78074	2.12697	1.59886	0	0	6.01	6.79	2.03	0	0.62	0	0.46	0.69	5.12	5.78	3.94	5.3	8.04	6.98	2.47
13496	Arid3a	0.954169	9.89825	10.9472	9.45266	9.86912	11.6927	9.85882	9.12075	8.27201	5.69115	3.72877	2.24354	0	0	0	0	16.44	6.88	4.98	7.66	7.26	6.81	4.53	4.83	2.42	3.39	0	0	0	0	0
56380	Arid3b	0.370942	4.23471	4.34424	4.70285	3.70959	3.50464	4.16238	2.92259	1.58396	1.45846	1.38204	1.95892	0	0	0	0	1.71	0	0	2.98	4.21	0	0	0	0	0	0	0	0	0	0
238247	Arid4a	0.309571	6.82278	2.6242	7.15419	6.96283	2.54278	6.02245	4.80593	4.84282	4.57397	4.42862	3.98828	4.07491	3.07816	0	0	8.63	0	0	0	0	0	0	0	0	0	0	0	0	0	0
94246	Arid4b	0.4334	4.81643	1.24703	2.86844	4.37516	0	3.12757	4.15358	3.58827	2.28244	1.74422	2.79759	3.09538	2.26979	0	1.90321	1.26	0	0	0	0	0	0	0	0	0	0	0	0	0	0
71371	Arid5b	0.312554	1.20145	0	1.31177	1.4978	1.66115	2.42151	2.3252	1.06658	2.40644	2.95595	1.73064	1.78195	2.42846	1.80488	2.89932	0	0	0	0	0	1.24	0	0	0	0	0.84	0.5	0.77	0.57	0
11863	Arnt	0.666671	12.3202	10.4808	11.0457	9.48097	9.15252	9.17703	7.75494	7.25225	7.62681	8.54213	5.72507	8.30842	6.5479	4.22107	4.66343	16.13	19.19	34.51	59.66	72.08	63.12	35.54	0	5.18	14.4	11.51	0	1.17	0.65	0
11865	Arntl	0.592857	2.56427	1.98605	2.1669	3.24087	4.29566	4.27538	6.43154	5.2527	5.29245	5.45911	5.03672	4.53703	6.60617	6.03997	7.02028	5.88	16.08	17.97	9.43	20.65	283.41	172.93	225.08	13.76	26.44	62.73	545.66	157.55	293.2	828.48
11908	Atf1	-0.433013	36.0804	26.6668	36.781	33.3445	21.9624	20.1084	15.0813	18.1441	17.0681	13.5025	10.1303	9.94672	10.2754	6.13029	7.27924	0	0	0	0	0	0	0	0	0	0	0	0	0	33.48	0
226641	Atf6	0.309295	6.42053	3.96252	6.04223	5.71785	4.08466	4.42161	3.99632	5.1119	3.95861	4.12491	2.91848	4.69109	6.42289	4.04447	4.79549	0	0	0.87	0	0	0	0	0	0	0	0	0	0	0	0
223922	Atf7	0.365286	2.51989	2.84831	2.70308	2.22045	2.39841	2.23562	2.27899	1.2663	1.65389	2.35866	0	1.21525	1.27567	0	0	36.19	11.48	17.96	8.99	6.47	18.76	7.35	3.37	0	0	0	0	7.28	43.98	3.53
116848	Baz2a	-0.703571	11.2402	10.6886	11.2542	11.0752	10.8112	9.73345	7.77827	7.65151	6.83642	5.37213	5.04442	4.77227	3.86034	2.5287	3.46226	5.8	6.16	4.64	6.78	6.64	10.81	16.94	12.36	10.8	21.71	22.59	6.61	38.99	55.4	6.81
407823	Baz2b	-0.00357143	6.89192	1.86954	4.78306	6.66625	4.35498	8.47175	6.00017	9.2832	3.74904	5.7904	4.73293	6.61222	3.85389	0	2.09276	40.02	21.95	15.83	9.31	13.63	8.89	18.56	24.22	25.47	17.43	21.05	5.76	14.81	18.37	3.76
14025	Bcl11a	0.72243	21.2091	17.4929	20.2734	14.474	9.49065	2.76637	4.67838	4.1371	2.59318	0	0	0	0	0	0	12.33	8.74	9.03	0	0	0	0	0	0	0	0	0	0	0	0
12053	Bcl6	0.837141	0	0	0	0	0	0	0	0	0	0	0	0	4.9887	10.7683	15.3677	0	0	0	0	0	0	0	0	0	0	0	0	0	16.68	16.11
72567	Bclaf1	-0.171518	23.4928	7.47131	18.4501	17.1664	6.04864	12.2249	9.6674	9.93247	8.34906	8.42174	7.34018	9.04841	6.66423	1.42918	4.63883	41.54	4.55	7.99	0	1.9	0	0	2.18	0	0	0	7.35	9.14	12.1	17.42
20893	Bhlhe40	0.177281	4.31292	3.66655	4.05519	10.0865	15.4307	16.5295	26.8832	23.6447	28.2951	39.7293	31.9685	38.6489	11.383	7.57596	14.9935	0	0	0	0	0	4.71	4.83	0	0	0	14.68	4.72	51.18	51.55	0
12400	Cbfb	0.304306	12.2496	8.59473	7.57786	8.71393	6.69477	8.1439	7.03283	9.35213	7.8444	7.49081	6.45893	4.34566	5.50578	3.99861	3.8751	0	37.24	83.59	102.14	87.4	85.97	112.14	65.72	30.67	0	92.51	0	0	0	0
71702	Cdc5l	-0.760714	22.3425	17.0096	22.3541	19.715	12.5386	13.8877	10.6301	9.92127	9.86024	8.58598	8.04352	6.18526	5.06946	2.52969	3.51988	13.73	3.82	13.63	0	15.48	11.01	16.73	34.57	19.34	33.29	9.21	279.96	181.82	91.04	184.93
12606	Cebpa	0.815014	21.5157	39.1029	27.7982	47.2313	71.6237	91.9343	121.51	94.4652	101.913	112.485	124.664	99.9915	104.059	216.496	114.625	88.18	0	75.37	46.84	0	93.27	184.79	136.42	150.01	230.39	219.77	183.59	392.32	336.07	96.99
12608	Cebpb	0.747109	11.3256	17.9518	17.6032	22.6759	34.6358	38.9441	42.9174	54.7115	30.4075	39.6273	44.3371	62.3621	141.318	60.3191	300.869	0	0	0	0	0	0	0	0	0	0	0	46.51	162.54	240	131.79
110794	Cebpe	0.187141	1.62825	3.27976	4.35731	6.20131	15.8646	15.1283	14.007	15.0866	6.2892	6.6064	3.81984	0	1.60611	4.79843	4.0488	0	0	0	16.51	0	0	0	0	0	23.28	0	0	0	0	0
12611	Cebpg	0.123718	9.68554	6.08603	9.88656	9.84323	7.04925	14.4814	15.5985	10.0998	10.0197	9.69998	8.35073	12.0256	9.34854	6.40758	11.0893	0	0	0	0	0	0	0	0	32.8	0	0	0	0	0	0
12607	Cebpz	0.125	18.188	8.96879	13.6576	13.0861	5.32768	8.61001	7.31923	9.63924	5.99348	4.99568	4.81935	6.10017	6.22709	3.92503	7.21016	4.65	3.18	8.33	1.65	5.91	5.11	6.05	3.89	2.01	0.96	27.41	0	0.46	3.69	1.83
320394	Cenpt	0.404467	19.9911	18.6086	17.906	17.7879	16.0969	11.1146	7.96182	7.8416	7.52778	5.73911	6.20029	3.97406	1.85802	1.20457	1.01788	0	0	2.46	3.3	0	0	0	0	0	0	0	0	0	0	0
12753	Clock	0.688176	1.01235	0	1.07886	0	0	1.26503	1.04447	1.46489	1.57539	1.87345	1.80712	1.59209	2.03198	1.15142	2.57999	1.63	4.38	8.54	9.49	19.87	18.78	24.61	34.68	15.39	29.06	400.47	103.78	89.98	182.73	166.14
12912	Creb1	-0.254815	5.52829	2.43859	4.58393	4.36885	2.26172	3.34328	2.23267	1.90865	2.21237	1.90912	1.71746	1.42633	1.15899	0	0	451	106.35	57.66	0	0	0	0	0	35.49	76.88	39.5	127.64	43.78	162.9	113.77
208677	Creb3l3	0.701066	7.77485	13.7702	13.7919	14.7224	24.221	22.8176	47.1513	94.2444	57.853	86.3948	69.1299	110.49	56.1694	108.544	74.3939	0	0	0	0	0	0	5	20.03	0	0	28.44	26.47	0	15.96	2.1
[truncated: 308 more rows]

## Sheet: Sheet3
Gene.ID	GeneSymbol	P_TF_cor	E12.5_P	E13.5_P	E14.5_P	E15.5_P	E16.5_P	E17.5_P	E18.5_P	D1_P	D3_P	D5_P	W1_P	W2_P	W3_P	W6_P	W8_P	E12.5_TF	E13.5_TF	E14.5_TF	E15.5_TF	E16.5_TF	E17.5_TF	E18.5_TF	D1_TF	D3_TF	D5_TF	W1_TF	W2_TF	W3_TF	W6_TF	W8_TF
[truncated: 150 more rows]

[truncated: 4 more sheets: Sheet4, Sheet5, Sheet6, Readme]
