# Supplementary material for: A time-resolved multi-omic atlas of the developing mouse liver
Source: HighWire-hosted journal article supplement (doi:10.1101/gr.253328.119), 2020-02-01
Supplement: Supplemental_Table_S7.xlsx [file Supplemental_Table_S7.xlsx]

## Sheet: TF_Profiling_mRNA_cor
Gene.ID	GeneSymbol	Correlation	E12.5_P	E13.5_P	E14.5_P	E15.5_P	E16.5_P	E17.5_P	E18.5_P	D1_P	D3_P	D5_P	W1_P	W2_P	W3_P	W6_P	W8_P	E12.5_R	E13.5_R	E14.5_R	E15.5_R	E16.5_R	E17.5_R	E18.5_R	D1_R	D3_R	D5_R	W1_R	W2_R	W3_R	W6_R	W8_R
104394	E2f4	0.810088	0.966667	0.666667	0.196667	0.156667	0.22	0	0	0	0	0	0	0	0	0	0	180.003	217.228	187.5	167.218	155.805	98.7996	58.8104	48.4344	54.2918	26.8205	23.9962	9.37009	10.6632	11.4807	10.4227
108655	Foxp1	0	0.01	0	0	0	0	0	0	0	0	0	0	0	0	0	0	1.82301	1.47184	3.13126	2.78811	2.94052	2.2144	0	2.67814	0	4.34353	2.76092	1.00418	1.0296	1.66398	1.38327
110794	Cebpe	0.458798	0	0	0	0	0	0.0933333	0.0433333	0	0	0	0	0	0	0	0	1.62825	3.27976	4.35731	6.20131	15.8646	15.1283	14.007	15.0866	6.2892	6.6064	3.81984	0	1.60611	4.79843	4.0488
11538	Adnp	0.880145	0.236667	0.193333	0.14	0.1	0.0866667	0.0666667	0.0666667	0.06	0.04	0.0766667	0.0433333	0.03	0.0366667	0	0	23.0034	15.5448	19.356	17.8157	13.499	13.8009	9.44344	10.3177	10.7361	11.8978	9.5333	10.9251	6.08391	3.68496	4.26987
116848	Baz2a	0.617797	0.00666667	0.0133333	0.0233333	0	0	0	0	0	0	0	0	0	0	0	0	11.2402	10.6886	11.2542	11.0752	10.8112	9.73345	7.77827	7.65151	6.83642	5.37213	5.04442	4.77227	3.86034	2.5287	3.46226
116870	Mta1	0.839286	0.44	0.316667	0.143333	0.22	0.12	0.163333	0.03	0.0433333	0.0966667	0.05	0.0833333	0.0533333	0.0266667	0	0.0233333	41.1111	43.1983	32.1849	27.1376	27.171	18.7202	16.7406	19.827	15.7597	16.7477	15.9071	18.4352	12.2009	10.4627	9.5518
116871	Mta3	0.556456	0.243333	0.186667	0.193333	0.0966667	0.103333	0.106667	0.05	0	0.0833333	0.12	0.08	0	0	0	0	10.835	5.45255	13.1769	7.73829	7.55233	11.0996	10.7612	8.4734	9.76496	7.655	2.99647	5.08104	5.00736	5.70894	4.38763
11819	Nr2f2	0.160422	0.28	0.03	0	0.0133333	0.01	0	0	0	0	0	0	0	0	0	0	12.058	8.25836	6.83486	6.5688	5.1876	6.11539	5.43568	7.52899	9.07876	10.9768	10.8724	9.34533	6.57179	4.12298	4.0996
11863	Arnt	0.309295	0	0.02	0	0	0	0	0	0	0	0	0	0	0	0	0	12.3202	10.4808	11.0457	9.48097	9.15252	9.17703	7.75494	7.25225	7.62681	8.54213	5.72507	8.30842	6.5479	4.22107	4.66343
11908	Atf1	0.374283	0.126667	0	0	0	0	0.09	0	0	0	0	0	0	0	0	0	36.0804	26.6668	36.781	33.3445	21.9624	20.1084	15.0813	18.1441	17.0681	13.5025	10.1303	9.94672	10.2754	6.13029	7.27924
12400	Cbfb	0.695524	0.72	0.366667	0.176667	0.296667	0.163333	0.313333	0.633333	0.356667	0.603333	0.65	0.316667	0	0	0	0	12.2496	8.59473	7.57786	8.71393	6.69477	8.1439	7.03283	9.35213	7.8444	7.49081	6.45893	4.34566	5.50578	3.99861	3.8751
12607	Cebpz	0.680112	0.126667	0.18	0.103333	0.0733333	0.0566667	0.03	0.02	0.0266667	0.07	0.0133333	0	0	0	0	0	18.188	8.96879	13.6576	13.0861	5.32768	8.61001	7.31923	9.63924	5.99348	4.99568	4.81935	6.10017	6.22709	3.92503	7.21016
12912	Creb1	0.542589	0.29	0.283333	0.306667	0	0	0.213333	0.126667	0.14	0	0	0.133333	0.153333	0	0	0	5.52829	2.43859	4.58393	4.36885	2.26172	3.34328	2.23267	1.90865	2.21237	1.90912	1.71746	1.42633	1.15899	0	0
13018	Ctcf	0.918395	0.306667	0.146667	0.13	0.163333	0.14	0.116667	0.08	0.05	0.0166667	0.02	0.05	0.0333333	0	0	0	30.0943	21.968	27.191	27.9994	20.7455	15.0031	13.4353	10.3567	14.9994	9.92111	7.50213	6.07645	4.01035	4.7001	3.4229
13047	Cux1	0.594437	0.0233333	0	0.0133333	0	0.00666667	0	0.0233333	0	0	0	0	0	0	0	0	11.6897	10.7999	9.09956	8.03796	7.46265	4.69572	6.72265	5.62708	3.67215	5.07503	3.20361	2.29169	3.1105	6.40854	4.69169
13418	Dnajc1	0.440481	0	0	0.0133333	0.0133333	0.0166667	0.05	0	0.0466667	0.12	0.166667	0.2	0.133333	0	0	0.106667	3.68165	3.18091	3.25139	4.91594	3.06163	4.27561	4.11869	3.3753	5.07843	3.87537	4.81035	5.03145	4.16254	4.32094	4.40402
13496	Arid3a	0.692941	0.136667	0.0566667	0.07	0.08	0.06	0.08	0.03	0.106667	0.103333	0	0	0	0	0	0	9.89825	10.9472	9.45266	9.86912	11.6927	9.85882	9.12075	8.27201	5.69115	3.72877	2.24354	0	0	0	0
14011	Etv6	0.301841	0	0.0133333	0	0.0166667	0	0	0	0	0	0	0	0	0	0	0	4.31137	3.69683	3.55416	2.90199	2.64837	2.04839	2.65803	2.99671	2.72339	2.28071	2.12445	1.43802	1.30312	3.11176	3.42789
14025	Bcl11a	0.776345	0.17	0.0533333	0.0566667	0	0.0433333	0	0	0	0	0	0	0	0	0	0	21.2091	17.4929	20.2734	14.474	9.49065	2.76637	4.67838	4.1371	2.59318	0	0	0	0	0	0
14390	Gabpa	0.730052	0.36	0.29	0.25	0.226667	0.186667	0.186667	0.0966667	0.06	0.16	0.13	0.196667	0.12	0	0	0	9.74833	4.74723	8.81294	7.32014	5.15522	5.23094	4.56223	5.1388	5.63362	4.69727	4.71013	5.64489	4.64283	2.44524	3.56716
14391	Gabpb1	0.530999	0.12	0.0533333	0	0	0.0733333	0	0	0	0	0	0	0	0	0	0	8.71913	9.13729	8.71329	9.30467	7.64978	6.23929	3.79637	4.71736	5.97507	2.7887	2.45612	2.06326	1.57476	1.67818	3.43052
14582	Gfi1b	0.436931	0	0.0433333	0	0	0	0	0	0	0	0	0	0	0	0	0	64.4593	83.8821	59.2325	49.1795	54.1471	32.4297	21.8825	25.041	16.1167	7.20669	5.24316	0	0	0	0
14815	Nr3c1	0.261861	0	0.0133333	0.0166667	0.0266667	0	0.02	0.0333333	0	0	0.0966667	0	0.26	0.223333	0.0466667	0.03	5.55571	4.30481	6.55512	7.70573	5.91355	9.19762	6.87564	6.50655	7.36601	8.66934	7.32172	8.95321	7.29867	3.76008	5.23758
14886	Gtf2i	0.580876	1.25333	0.966667	0.85	0.673333	0.64	0.696667	0.633333	0.353333	0.673333	0.283333	0.6	0.39	0.473333	0.3	0.0566667	40.245	41.8981	32.5379	31.501	36.0571	25.8687	29.6975	24.0152	28.5587	36.3937	21.8681	28.9251	28.2916	24.5559	17.6174
15354	Hmgb3	0.932143	8.96667	5.28333	5.64	3.60667	5.17667	2.71667	3.21	3.97667	3.07333	1.17	1.93333	0.953333	1.18667	0.24	0	139.7	104.075	142.029	100.865	61.1201	51.0855	35.3051	32.5183	28.3156	17.5599	13.9977	10.8794	7.78624	3.76491	4.09736
15364	Hmga2	0.880321	9.63667	1.52667	0.303333	0	0.313333	0.176667	0	0	0	0	0	0	0	0	0	18.0172	8.15966	5.96052	3.07045	1.5415	1.02086	0	0	0	0	0	0	0	0	0
15378	Hnf4a	0.843333	0	0.05	0.0433333	0	0.0833333	0.08	0.0533333	0.113333	0.11	0.17	0.08	0.176667	0.246667	0.156667	0.11	22.1583	27.303	26.3107	32.0033	38.2502	37.054	49.8873	67.6896	48.7629	58.5895	54.2902	62.9822	100.363	77.8446	102.303
16549	Khsrp	0.692857	7.78	7.85667	6.35333	5.95667	5.03	5.94	4.65667	4.94333	7.84667	5.50333	6.12667	5.78	4.74667	3.07333	2.69333	66.5983	75.2346	59.0611	52.4474	51.5879	37.1107	27.446	26.1333	24.1941	20.0143	20.3096	14.5134	12.236	11.3929	10.2468
16969	Zbtb7a	0.695293	0.126667	0.11	0.113333	0.07	0.18	0.0766667	0	0	0.0266667	0.0833333	0	0	0.0433333	0	0	38.908	43.3138	42.0015	37.5952	34.1639	22.7164	15.7614	15.4235	14.3824	11.5901	11.2508	8.20557	6.91999	7.96583	8.21098
16978	Lrrfip1	0.443253	0.116667	0.123333	0.226667	0.106667	0.136667	0.17	0.23	0.243333	0.503333	0.36	0.636667	0.333333	0.493333	0.326667	0.226667	6.17489	3.18124	5.7387	6.77764	5.415	6.18251	9.02284	10.6181	7.11623	7.56755	7.73639	6.64306	6.42869	2.87502	5.08795
17002	Ltf	0.929151	0.00666667	0.153333	2.40333	1.64667	2.49333	7.21333	10.39	2.48333	2.75667	4.01	2.31333	0.16	0.0633333	0	0	7.51344	8.47469	11.2491	30.3673	97.0785	139.429	124.274	115.047	66.5482	76.9845	45.886	1.96658	0	0	0
17089	Lyar	0.830923	1.08	0.526667	0.13	0.0566667	0.11	0.07	0.0566667	0	0.0466667	0	0	0	0	0	0	75.8341	53.6379	66.3585	46.7279	22.0366	20.2141	20.5142	22.4423	14.1253	11.6581	13.4826	7.71888	12.5266	4.46454	7.22709
17127	Smad3	0.433013	0	0.0366667	0	0	0	0	0	0	0	0	0	0	0	0	0	4.5974	5.1044	4.15127	4.0248	3.37286	2.94338	2.35364	2.6532	2.2996	3.48728	2.00044	2.95147	1.69627	1.72299	2.19124
17129	Smad5	-0.123718	0	0	0	0	0.0133333	0	0	0	0	0	0	0	0	0	0	4.62747	4.07003	4.41689	3.62491	3.85654	3.83908	3.90866	5.1864	5.49225	6.17367	4.88075	4.80634	3.78719	2.47894	2.43538
17134	Mafg	0.185577	0	0	0.0266667	0	0	0	0	0	0	0	0	0	0	0	0	60.004	48.6373	41.4458	40.6383	46.3863	43.849	27.063	20.249	24.638	19.1235	25.4698	21.1814	26.1013	13.9257	24.5318
17187	Max	0.495019	0	0.116667	0.24	0	0	0	0	0	0	0	0	0	0	0	0	38.7413	36.4735	33.7332	32.6707	24.0647	26.337	21.7211	22.1763	17.355	14.2741	13.4004	13.0376	7.58673	7.38766	7.13618
17188	Maz	0.513129	0.0866667	0	0	0.03	0.0266667	0	0	0	0	0	0	0	0	0	0	197.296	258.776	181.599	164.635	159.789	113.096	77.4121	77.3942	67.0138	50.8366	51.8112	33.4243	37.4789	34.8924	24.8382
17190	Mbd1	0.622981	0.133333	0.03	0.0466667	0.04	0	0	0	0	0.0133333	0	0	0	0	0	0	14.9446	13.3426	13.4921	12.6127	11.4187	7.8932	7.2816	7.57733	7.32013	6.79253	5.44559	5.62888	6.01414	9.10004	14.8081
17191	Mbd2	0.83198	0.223333	0.983333	0.11	0.193333	0.173333	0.446667	0	0.05	0.04	0	0	0	0	0	0	50.9013	50.5173	54.164	54.9914	50.2943	52.7634	32.9011	32.6473	29.9823	20.7518	22.639	19.4082	18.6927	19.4733	20.9426
17192	Mbd3	0.810041	0.51	0.546667	0.333333	0.343333	0.136667	0.106667	0.12	0.0733333	0.193333	0.06	0.0633333	0.0466667	0	0	0	110.458	136.362	92.4879	81.423	85.6052	56.3297	50.4231	55.5359	51.7667	41.9538	54.1801	39.5788	41.4741	54.9582	40.146
17257	Mecp2	-0.549634	0.0166667	0	0	0	0	0	0.0333333	0.03	0.09	0.0866667	0.0633333	0	0	0.0966667	0.04	4.74341	4.82185	4.55491	4.39734	4.19771	2.80598	2.66388	2.89567	2.31067	1.95582	1.42139	1.72559	1.68993	1.62405	0
17261	Mef2d	0.779182	0.01	0.0166667	0.0133333	0.00666667	0	0	0	0.01	0	0	0	0	0	0	0	18.7321	19.6992	16.1982	12.8736	12.6311	13.5252	10.8722	12.9236	9.90148	10.5884	8.1302	9.14532	6.53329	5.10166	6.20057
17268	Meis1	0.4334	0.0333333	0	0	0	0	0	0	0	0	0	0	0	0	0	0	5.08547	2.73468	3.46621	2.73383	2.64153	1.85788	2.40134	2.45823	1.839	2.65944	3.28817	3.27477	2.94846	0	0
17425	Foxk1	0.484716	0.0366667	0.0133333	0.02	0.02	0	0	0.0166667	0.0133333	0.03	0.04	0	0	0	0	0	4.53817	4.6154	3.9584	3.74765	4.12387	2.87442	3.16119	2.98974	3.21529	3.80646	2.14985	4.11977	1.76903	1.81159	1.84395
17876	Myef2	0.806077	0.436667	0.44	0.26	0.296667	0.366667	0.196667	0.223333	0.1	0	0.173333	0.0733333	0.0633333	0.0466667	0	0.07	23.0941	8.12248	16.2758	15.6439	6.19749	9.54809	5.8063	5.00044	5.57673	4.66107	5.3416	4.16643	2.42072	0	2.20612
18027	Nfia	0.899028	0	0	0	0	0	0	0	0.0233333	0	0.0566667	0.0466667	0.173333	0.213333	0.08	0.0733333	0	0	0	1.10801	0	1.09936	2.39596	2.49031	2.32192	3.1915	2.72508	3.18404	4.58796	2.98188	4.37084
18028	Nfib	0.920152	0	0	0	0	0	0.02	0.0233333	0.0266667	0.0466667	0.23	0.16	0.323333	0.33	0.163333	0.143333	3.23144	1.61447	1.85621	2.85527	2.00199	3.99477	4.55229	5.95165	5.84351	8.49303	8.75882	12.0709	10.0576	4.7785	5.24868
18029	Nfic	0.803805	0	0	0	0	0	0	0	0	0.0233333	0.05	0.176667	0.0866667	0.22	0.0666667	0.256667	5.11347	5.70365	3.98865	4.58126	5.03694	4.87627	4.51631	12.0222	10.3922	16.8343	15.9183	15.5597	17.7334	29.9851	14.0219
18032	Nfix	0.199215	0	0	0	0	0	0	0	0	0	0	0	0.13	0	0	0.0333333	3.64346	8.6364	7.2327	7.20616	4.25084	3.8881	2.83784	10.3973	10.8522	11.3997	10.7712	17.1844	19.0254	31.1565	8.24863
18033	Nfkb1	0.180842	0.0233333	0.0566667	0.0166667	0.0166667	0.0266667	0.316667	0.18	0.18	0.206667	0.05	0.0966667	0.546667	0.0233333	0	0.0533333	10.3487	11.0612	9.63341	9.08634	9.28205	8.60559	9.93091	11.3458	9.67239	10.1076	9.52688	7.39489	6.3664	6.12652	5.4946
18034	Nfkb2	0.0181104	0.00666667	0	0	0	0	0	0	0	0	0	0.0233333	0	0	0	0	5.73193	7.30538	4.78485	4.68903	5.42876	4.77443	4.43723	3.8646	4.23364	3.97067	4.07222	4.22508	2.91926	5.07534	7.42154
18044	Nfya	0.705858	0.166667	0.333333	0.103333	0.113333	0	0	0	0	0	0	0	0	0	0	0	24.833	16.1507	21.5174	19.9142	15.5094	17.2844	11.1987	8.27246	11.6347	8.24727	5.57503	1.91532	1.65104	0	2.1007
18046	Nfyc	0.433013	0	0.413333	0	0	0	0	0	0	0	0	0	0	0	0	0	23.2327	27.8601	26.8762	21.7672	20.303	14.6984	11.6348	13.055	13.7992	11.8502	12.4852	11.2688	9.27933	7.26755	8.65488
18181	Nrf1	0.695262	0.463333	0.38	0.18	0.146667	0.306667	0	0	0.116667	0.186667	0	0.116667	0	0	0	0	24.1645	21.5404	22.9075	22.8858	14.67	15.4994	10.7362	6.51701	10.2612	6.59675	4.95644	3.42633	1.56201	3.12206	2.1614
18515	Pbx2	0.591608	0.0766667	0.106667	0	0	0	0	0	0	0	0	0	0	0	0	0	27.9394	32.8267	23.6514	23.1159	24.7486	20.0647	16.7971	20.5236	12.7968	10.9254	12.3641	11.7425	6.10143	5.71836	5.52963
18673	Phb	-0.075	8.27333	8.45	8.62333	6.95	7.21	12.08	12.09	19.4233	32.9067	28.9867	39.3967	50.31	36.4567	32.2933	23.4533	60.2945	122.892	106.209	96.6577	101.907	102.161	96.3147	142.551	80.9479	74.2058	101.358	89.4404	111.138	103.697	67.5205
18986	Pou2f1	-0.0714286	0	0	0	0	0.0566667	0	0	0	0	0	0	0	0	0	0	2.85208	0	0	0	0	0	0	0	0	0	0	0	0	0	0
19130	Prox1	0.444895	0	0.0466667	0.0433333	0.0233333	0.0433333	0	0.07	0	0.1	0.383333	0.45	0	0	0	0.286667	4.49	3.19149	6.19985	6.6782	4.06827	4.83642	6.92101	7.47783	9.45736	13.4377	11.3026	12.5657	6.88926	5.96336	13.2256
19290	Pura	0.837211	0.0733333	0	0.0733333	0.12	0.24	0	0.236667	0.333333	1.41	0.666667	1.88333	2.67667	2.48667	2.06	1.70333	1.38336	1.05066	1.23658	1.21039	1.15369	1.63825	1.71712	1.906	1.87689	1.91675	2.10007	2.91343	2.45194	1.81862	2.34332
19291	Purb	-0.729223	0.51	0.406667	0.42	0.463333	0.406667	0.53	0.61	0.466667	0.556667	0.986667	0.913333	1.27667	1.74	0.77	0.833333	10.8772	7.40069	11.1267	11.2092	5.79479	8.08687	5.91665	6.10644	5.94171	5.12494	5.07432	4.39735	4.05909	2.08096	2.66424
19664	Rbpj	0.552617	0.0966667	0	0.103333	0.0333333	0.0466667	0.03	0	0	0.0333333	0	0	0	0	0	0	5.22802	4.85966	4.34096	3.94559	2.79313	2.30051	3.11555	2.44089	2.6063	3.09473	1.76422	2.27306	1.59245	1.16863	0
20024	Sub1	0.435714	10.1633	9.65	8.9	6.29	7.98333	11.0133	4.74333	9.38667	9.83333	5.04667	8.24333	9.94333	6.15	3.47	2.93333	41.042	26.5339	36.0222	31.5501	20.3534	25.3419	20.4004	19.3643	19.2775	18.5003	20.2553	14.8876	19.4498	9.33569	11.6763
20181	Rxra	0.735561	0	0	0	0	0.0233333	0	0.02	0	0	0.0533333	0.0666667	0.133333	0.04	0.0233333	0.04	11.9305	19.3287	14.9436	16.4134	24.443	22.5082	36.9709	41.672	40.317	60.6625	42.6031	44.1714	73.941	104.788	80.874
20185	Ncor1	0.693403	0.0666667	0.0266667	0.273333	0.04	0.0633333	0.0233333	0	0	0.01	0	0	0	0	0	0	19.7368	11.4595	17.5809	15.6286	12.3222	14.6026	11.6122	12.5328	8.4236	10.8243	9.34912	10.2238	9.65707	7.88919	8.83641
20588	Smarcc1	0.957143	0.756667	0.813333	0.576667	0.4	0.513333	0.47	0.166667	0.19	0.29	0.163333	0.136667	0.0733333	0.06	0	0.03	25.8697	24.5081	21.164	17.0714	14.9519	9.1402	8.19077	7.79257	7.42657	7.61558	6.49867	4.02088	3.48544	3.3192	1.97678
20602	Ncor2	0.247436	0.0133333	0	0	0	0	0	0	0	0	0	0	0	0	0	0	7.52107	8.85346	5.30588	5.57045	6.63643	4.81962	6.91972	4.69494	7.10421	8.17932	7.83439	7.25108	5.78062	7.36116	5.79462
20658	Son	0.354205	0.5	0.486667	0.313333	0.286667	0.263333	0.22	0.116667	0.306667	0.313333	0.3	0.22	0.266667	0.0966667	0.273333	0.4	33.1543	27.6343	30.4966	28.48	22.4027	25.7754	20.1257	21.1963	19.9121	16.3908	17.9592	15.5108	14.8796	9.83997	13.2517
20679	Sox6	0.423189	0.0766667	0.05	0.0333333	0.0133333	0.00666667	0	0	0	0	0	0	0	0	0	0	3.68716	0	1.57607	1.39566	1.06193	1.19847	2.26396	0	2.14934	0	0	0	0	0	0
20684	Sp100	0.658179	0	0	0	0	0	0	0.0366667	0	0.0366667	0.0233333	0.07	0	0.0233333	0	0	0	0	0	1.08449	1.01496	1.25104	4.73224	4.46635	5.0469	3.77316	2.43273	3.34233	2.06224	0	1.10845
20687	Sp3	0.57752	0.0833333	0.06	0	0.0766667	0.0566667	0	0	0	0	0	0	0	0	0	0	17.2956	9.22722	17.878	20.8109	10.938	13.5142	8.90898	8.93782	9.66267	8.16997	7.47214	7.88744	3.86186	1.5244	4.39234
20833	Ssrp1	0.875	3.51667	4.46	3.43333	2.43333	2.39	2.07333	1.40667	1.24333	1.84333	1.27	1.71	1.29667	1.77333	0.336667	0.536667	135.411	131.77	128.636	103.127	78.5068	60.5148	39.7859	51.9389	48.5729	35.9082	29.6004	22.5182	25.975	14.2874	12.49
20846	Stat1	0.828571	0.246667	0.353333	0.423333	0.343333	0.3	0.493333	1.45	1.16333	1.88667	6.78	4.94	2.26	2.85667	2.46333	1.65667	3.73752	4.57285	5.8314	5.40219	4.03211	5.07896	14.0605	9.13911	13.0547	14.4078	15.0543	7.57765	6.25234	10.4232	8.7616
20847	Stat2	0.771202	0	0	0.03	0	0.0166667	0	0.0766667	0.08	0.18	0.203333	0.216667	0.28	0.27	0.09	0.246667	4.59363	4.0075	5.25856	5.31907	4.89136	6.9385	14.454	14.317	11.447	11.9074	15.9397	12.064	15.0512	12.5419	20.8351
20848	Stat3	0.460714	0.263333	0.24	0.436667	0.36	0.413333	0.543333	0.78	0.71	1.61	1.73333	1.44	1.25	1.06	0.46	0.856667	13.5942	18.1491	14.2856	18.5497	21.079	17.8359	21.6703	22.5945	19.3548	19.8747	26.2371	22.811	18.2904	30.1866	44.7366
20851	Stat5b	0.0678571	0.23	0.176667	0.24	0.22	0.216667	0.28	0.27	0.226667	0.316667	0.346667	0.466667	0.793333	0.386667	0.276667	0.133333	15.2037	16.8284	13.6836	14.0162	15.5485	10.3982	10.922	10.9112	11.4318	13.5532	11.7036	18.1287	14.7434	9.82322	9.67301
208968	Zfp280c	0.207109	0.0133333	0.01	0	0	0	0	0	0	0	0	0	0	0	0	0	2.49145	1.12122	2.54201	2.08195	1.01612	0	1.22346	1.47869	1.50245	1.25671	1.32352	0	1.39125	0	0
209446	Tfe3	0.433013	0	0.03	0	0	0	0	0	0	0	0	0	0	0	0	0	8.36028	11.873	8.33443	6.45519	9.74851	7.73491	7.77765	11.0266	8.56363	8.57779	6.46206	8.33187	7.38458	8.73084	6.97166
213054	Gabpb2	0.597374	0.0466667	0.07	0.0166667	0	0	0	0	0	0	0	0	0	0	0	0	12.0013	9.08778	14.011	12.6872	7.7431	7.41448	6.04998	6.09859	6.73962	5.21429	4.41896	2.12121	3.39385	1.23148	2.25174
21349	Tal1	0.88223	0.97	0.216667	0.396667	0.1	0.0666667	0.07	0	0	0	0	0	0	0	0	0	131.19	117.649	137.406	118.324	102.511	70.5218	36.0351	17.0877	28.8001	10.0111	10.5145	0	0	0	0
21406	Tcf12	0.474836	0	0.12	0.0666667	0	0.00666667	0	0	0	0	0	0	0	0	0	0	10.2005	7.71214	11.1919	8.73222	6.0988	6.59022	5.86205	5.48112	6.70135	5.86829	4.43091	4.46117	3.30423	0	2.04199
21423	Tcf3	0.82176	0.116667	0.0433333	0.0666667	0.0433333	0.0266667	0	0	0	0	0	0	0	0	0	0	78.7754	91.0868	68.877	64.063	61.8101	41.8775	35.1817	31.3975	27.8503	16.9853	17.6248	8.88114	6.44864	6.02575	5.51748
21428	Mlx	0.371154	0	0	0	0	0	0	0	0	0	0	0	0	0	0	0.1	15.6412	16.7974	13.1486	13.0515	12.3179	11.0909	10.0617	10.9554	11.2911	7.94147	11.3842	6.23408	13.0604	17.9744	17.0864
21429	Ubtf	0.932143	1.80667	1.48667	0.82	0.973333	0.736667	0.833333	0.39	0.613333	0.783333	0.34	0.346667	0.333333	0.163333	0.0666667	0.09	63.3313	70.1685	58.7005	54.3824	45.9274	32.4164	29.863	32.9871	28.2171	22.0118	18.7194	14.1572	12.3083	11.6859	10.0771
214742	Rcor3	-0.123718	0	0	0	0	0	0	0	0	0.0666667	0	0	0	0	0	0	2.93586	2.33989	3.28529	3.14403	2.37299	2.6754	2.33915	2.6721	2.33481	2.76202	1.99248	2.05927	1.43756	0	1.05914
21750	Terf2	0.433013	0.00666667	0	0	0	0	0	0	0	0	0	0	0	0	0	0	15.143	12.7368	12.303	10.1475	10.2252	8.45089	6.97471	9.05539	6.68381	6.05288	5.86677	5.58746	3.77324	2.85684	2.82428
21780	Tfam	-0.257143	0.533333	0.366667	0.2	0.493333	0.316667	0.636667	1.12	1.03333	1.77667	1.65333	2.63	2.34667	3.05667	2.48667	2.09	15.9742	10.365	13.9763	11.4677	7.79642	9.14266	7.21985	9.62269	9.84746	10.5852	11.2254	11.8181	9.71786	5.34765	5.4158
21781	Tfdp1	0.827098	0.78	0.213333	0.07	0.156667	0.0133333	0	0	0	0	0	0	0	0	0	0	94.7381	82.8123	86.0751	71.5615	53.4166	44.8358	32.0732	28.9492	34.8715	21.5923	19.4871	8.79664	9.67155	6.82908	8.49813
217864	Rcor1	0.909241	0.6	0.52	0.29	0.19	0.15	0.143333	0.176667	0.146667	0.05	0.0733333	0	0	0	0	0	13.3192	10.523	12.9864	11.0672	8.40399	5.83463	4.2833	4.93674	4.90616	4.51675	3.5624	2.53732	2.39026	2.98877	3.04296
219150	Hmbox1	0.444201	0	0.01	0	0.0133333	0	0	0	0	0	0	0.05	0	0	0	0	3.30506	5.06234	3.75963	3.56099	2.48596	2.44718	4.25093	2.13715	4.0882	2.96488	4.03826	1.98019	2.58528	1.2049	3.79779
22130	Ttf1	0.433013	0	0	0.00666667	0	0	0	0	0	0	0	0	0	0	0	0	3.78126	2.41874	4.20982	3.09201	2.49004	2.24518	2.49143	2.59424	2.05667	2.12946	2.12807	1.44932	1.91834	1.26364	1.35901
22221	Ubp1	0.738821	0.183333	0.103333	0.116667	0.0966667	0.0866667	0.07	0.01	0.0133333	0.0233333	0.0566667	0.04	0	0	0.0366667	0.04	46.8898	38.0163	52.0647	48.298	35.1285	33.3674	22.5984	23.7281	19.7189	13.5164	13.5058	11.2542	10.8392	9.44134	9.21044
22278	Usf1	-0.404467	0	0	0	0.0733333	0	0	0	0	0	0	0	0	0.03	0	0	14.6897	22.3209	13.1341	12.8562	15.2548	15.4332	14.4363	17.7181	13.3725	16.6667	14.5926	16.0189	11.9352	10.7644	9.28754
223922	Atf7	0.434568	0	0.0166667	0	0	0	0	0	0	0	0	0	0	0	0	0	2.51989	2.84831	2.70308	2.22045	2.39841	2.23562	2.27899	1.2663	1.65389	2.35866	0	1.21525	1.27567	0	0
22404	Wiz	0.789827	0.0566667	0.0566667	0.0133333	0.0166667	0.0266667	0	0	0	0	0	0	0	0	0	0	13.2458	9.15148	12.7125	12.7095	11.6033	6.17758	4.7461	3.98448	3.21973	3.46976	3.33112	5.05669	3.57498	4.04903	5.17951
224481	Tfb1m	-0.0722914	0	0.0366667	0.0333333	0	0	0.05	0	0	0.14	0	0	0.2	0	0	0	10.2299	10.6477	9.97528	7.83554	7.00094	5.91924	5.02505	6.27672	6.16403	5.4423	7.25388	4.29045	6.67743	4.74554	4.36985
22608	Ybx1	0.623771	15.4633	11.5333	8.30667	4.76	4.53333	4.53333	5.87333	5.89	7.55	5.71333	4.76333	3.76667	7	3.92667	2.71	488.963	508.995	411.531	323.09	274.681	221.02	187.518	174.883	169.597	148.617	170.654	131.366	141.88	114.464	94.6113
22632	Yy1	0.846114	0.226667	0.103333	0.183333	0.06	0.0533333	0	0.02	0	0	0	0	0	0	0	0	27.3379	25.1456	26.4019	23.0677	20.9836	18.3986	14.6644	14.7153	13.9744	13.5112	11.8252	13.5152	8.30302	10.0202	9.39947
22661	Zfp148	0.0510576	0.08	0.0566667	0	0	0.03	0	0	0	0	0	0	0	0	0	0	2.98019	1.55056	2.84947	2.81218	1.64878	2.29779	1.90551	2.12306	2.84124	2.4344	2.2006	1.8991	1.30006	0	1.39002
226747	Ahctf1	0.667863	0.19	0.11	0.0866667	0.0733333	0.07	0.04	0.0266667	0.0266667	0.0533333	0.05	0.0866667	0.04	0.01	0	0.02	17.0868	12.5881	16.9082	16.4436	9.5857	10.332	6.03881	11.1058	9.96072	7.68433	5.42082	8.56354	8.48838	2.52231	3.41319
22680	Zfp207	0.568365	0.433333	0.44	0.333333	0.22	0.136667	0.183333	0.243333	0.223333	0.176667	0.386667	0.176667	0.426667	0.133333	0.11	0	32.3273	40.7023	28.5957	27.9336	27.0635	27.5713	26.66	33.8938	18.0224	16.8727	16.5197	13.0559	19.1948	10.1506	7.1594
22761	Zfpm1	0.86626	0.22	0.13	0.0966667	0.04	0.0633333	0.0266667	0	0	0	0	0	0	0	0	0	163.358	232.477	157.061	147.267	172.175	88.9463	58.0001	49.3836	59.6538	27.2618	32.6325	10.7694	9.91864	24.8733	22.808
22778	Ikzf1	0.804984	0.303333	0.17	0.15	0.233333	0.186667	0.05	0	0	0	0	0	0	0	0	0	14.1188	14.9946	17.773	18.3443	12.4413	5.92972	9.72698	11.4873	5.43485	5.22849	1.3296	0	0	0	0
22791	Dnajc2	0.757143	0.863333	0.543333	0.15	0.47	0.213333	0.193333	0.106667	0.18	0.19	0.143333	0.12	0.08	0.133333	0.0466667	0.06	30.9813	11.8308	23.9115	19.7165	6.64841	12.3116	11.0404	11.6275	8.44349	7.29125	8.20105	5.15911	6.29882	3.14125	5.45964
229004	Gmeb2	0.502918	0.05	0	0	0.0366667	0.01	0	0	0	0	0	0	0	0	0	0	8.74531	8.91078	9.30225	8.93104	8.44896	7.34716	4.97877	5.67849	4.86794	3.98919	4.81065	3.01303	3.21181	2.28183	2.87552
229542	Gatad2b	0.955863	0.36	0.276667	0.243333	0.246667	0.226667	0.15	0.08	0.0766667	0.123333	0.0533333	0.08	0	0	0	0	5.76197	5.14109	4.95092	4.65266	4.99217	3.07349	2.21491	2.56014	2.56648	2.39544	2.51485	1.49763	0	1.10431	1.40796
229663	Csde1	0.289286	3.27667	2.95333	1.68667	1.48667	1.68	1.46667	0.746667	1.55667	2.3	2.54667	3.15	2.44667	2.6	0.836667	2.10333	59.2123	24.0762	49.0117	45.9261	22.1273	35.1727	29.2019	31.3755	33.3479	33.4723	34.0372	33.3851	32.7912	14.441	27.9768
233410	Zfp592	0.371154	0	0	0.00666667	0	0	0	0	0	0	0	0	0	0	0	0	8.04784	7.91518	7.93396	7.43169	7.15689	6.02634	4.86908	5.51888	4.55429	4.3986	4.16002	3.83869	4.17049	4.07399	3.76161
238247	Arid4a	0.339837	0	0.02	0.01	0.0433333	0	0	0	0	0	0	0	0	0	0	0	6.82278	2.6242	7.15419	6.96283	2.54278	6.02245	4.80593	4.84282	4.57397	4.42862	3.98828	4.07491	3.07816	0	0
238317	Elmsan1	0.319951	0	0.01	0.0233333	0	0	0	0	0	0	0	0	0	0	0	0	6.72635	8.31859	8.57667	9.33433	11.8001	8.58013	5.06229	4.80256	3.98769	3.5852	3.2256	2.244	2.19341	1.22049	1.6415
23942	Mta2	0.537981	1.37667	0.846667	0.58	0.58	0.57	0.303333	0.44	0.516667	0.833333	0.803333	0.103333	1.27333	0.313333	0.31	0.0766667	69.7199	81.1414	61.4234	58.5121	52.1553	38.0341	30.9892	32.021	29.334	24.2478	21.2157	18.4601	14.9521	16.5267	12.8676
239985	Arid1b	0.722263	0.07	0.0666667	0.01	0.01	0.00666667	0.01	0	0	0.0233333	0	0	0	0	0	0	2.98954	2.5764	2.78125	2.45047	2.82531	1.71886	2.1568	1.18281	2.09631	2.14444	0	0	0	1.54505	0
24136	Zeb2	0.169638	0.0166667	0.01	0	0	0	0	0	0	0	0	0	0	0	0	0	5.98496	2.21302	3.37226	5.10514	2.76402	4.09801	4.48344	3.30386	4.99189	4.42354	3.51729	2.70089	0	0	0
244216	Zfp771	0.561634	0.0366667	0.0266667	0	0	0	0	0	0	0	0	0	0.0166667	0	0	0	26.0194	36.7666	17.3636	17.5978	19.3085	16.0096	17.3895	23.4017	15.6409	14.1952	15.4004	18.8083	21.2058	24.1082	18.5285
268741	Tox4	0.920152	0.196667	0.103333	0.14	0.103333	0.103333	0.103333	0.0433333	0.0666667	0.0366667	0.0533333	0.0166667	0	0	0	0	12.537	10.9082	9.2996	10.5021	10.9792	6.62655	5.71221	7.43643	5.17701	5.14075	5.26596	4.36966	3.67741	5.00864	4.12234
269639	Zfp512	0.433013	0.156667	0	0	0	0	0	0	0	0	0	0	0	0	0	0	9.38909	7.00207	8.23793	6.55986	5.55984	5.78399	4.99115	4.99639	4.3132	3.30426	4.112	4.42919	3.16943	1.73544	2.25315
320799	Zhx3	-0.461069	0	0	0	0	0	0	0	0	0	0	0	0.0666667	0	0	0.02	1.08229	0	0	1.50428	1.33185	1.43529	0	3.43245	1.06768	3.70754	3.43886	0	8.69793	5.28404	0
50794	Klf13	0	0	0	0.13	0	0	0	0	0	0	0	0	0	0	0	0	8.46646	10.3655	9.03318	9.86243	13.1419	10.7264	9.82659	12.2424	7.45341	5.80843	4.43284	5.0126	11.5459	5.52058	5.71796
50907	Preb	-0.232143	0.116667	0.126667	0.303333	0.233333	0.36	0.506667	0.77	0.713333	1.45	1.46	2.03667	1.01667	0.79	0.81	0.996667	23.2355	32.8393	33.8759	20.1514	25.7223	25.1895	21.7245	35.0118	29.7982	21.1438	18.0751	23.7333	41.3606	21.475	33.3293
54131	Irf3	0.235714	0.366667	0.306667	0.37	0.196667	0.186667	0.28	0.253333	0.21	0.336667	0.396667	0.273333	0.193333	0.58	0.316667	0.376667	27.0674	31.5087	23.7991	22.9105	26.1934	26.1715	26.3467	26.5887	24.3131	24.7838	24.0755	25.7468	29.5853	40.1811	26.8631
54367	Zfp326	0.318141	0.133333	0.123333	0.0866667	0.0566667	0.0633333	0.0833333	0.0766667	0.0966667	0.12	0.13	0.163333	0.216667	0.156667	0.03	0.12	6.79981	2.77558	5.044	3.77632	1.98422	3.25647	2.38472	4.43576	3.90236	2.90737	4.52193	2.98634	2.88115	1.96541	1.4843
54380	Smarcal1	0.458798	0	0.01	0	0	0.00666667	0	0	0	0	0	0	0	0	0	0	7.92183	7.68955	7.44089	5.61183	6.29404	4.63823	4.0336	3.72311	4.06807	4.52277	3.78868	2.50218	3.50494	3.56083	3.42167
56218	Patz1	0.4334	0	0.01	0	0	0	0	0	0	0	0	0	0	0	0	0	19.2866	22.1582	15.315	12.9086	12.1898	8.80279	7.5582	7.70282	4.98011	5.68174	4.58613	2.56447	2.31147	0	0
56449	Ybx3	0.889286	8.70333	4.84333	3.46667	3.77667	2.91	2.32	3.34	2.06667	3.01	1.72333	2.10333	1.69667	2.54667	0.79	0.643333	388.863	457.129	403.811	350.883	323.551	242.115	148.368	104.156	90.0205	47.6261	56.2224	26.0996	35.5432	20.9689	15.933
56469	Pias1	0.590097	0	0	0.01	0.01	0	0	0	0	0	0	0	0	0	0	0	6.61101	4.70163	7.06653	7.18898	4.96441	6.19456	4.91706	5.43497	5.69837	4.85764	4.30156	4.43144	3.05995	2.08466	2.29719
56484	Foxo3	0.87733	0.0166667	0.04	0.06	0.04	0.0466667	0.0233333	0	0	0	0	0	0	0	0	0	31.6074	33.4773	37.5378	34.6181	38.7214	27.4375	16.6726	8.97184	11.7683	6.48159	5.03002	3.92835	4.97882	4.39515	3.76432
56490	Zbtb20	0.684307	0	0	0	0	0	0	0	0	0	0	0	0	0.0333333	0.0966667	0.246667	0	0	0	0	0	0	0	0	0	1.20056	0	0	0	10.6476	7.69899
56809	Gmeb1	0.618771	0.0333333	0.11	0	0.0366667	0.116667	0	0	0	0	0	0	0	0	0	0	6.7518	5.88645	6.179	6.87826	3.97823	4.14913	2.34512	1.6492	2.23982	2.4419	2.02414	1.65276	0	1.1825	2.04088
57376	Smarce1	0.685714	0.82	0.616667	0.463333	0.313333	0.196667	0.25	0.24	0.163333	0.266667	0.203333	0.276667	0.256667	0.223333	0	0.0666667	38.0425	23.7108	34.0243	28.792	16.8693	18.585	15.1254	18.1283	14.6222	13.4858	13.0481	9.39046	10.3634	6.55658	7.85469
58180	Hic2	0.186243	0	0	0.29	0	0	0	0	0	0	0	0	0	0	0	0	4.02503	4.92405	3.30663	4.35137	3.70679	2.5113	1.58671	2.19656	1.15631	1.62658	1.29727	1.01506	0	0	0
58805	Mlxipl	0.637105	0	0	0	0	0	0	0	0	0	0.0166667	0	0	0.0266667	0.16	0.0666667	8.06218	5.94378	8.7368	9.3685	7.80666	10.6014	13.2641	20.08	21.8514	27.7112	32.8159	42.6376	40.848	39.2982	59.7102
59004	Pias4	0.69949	0.0366667	0.05	0	0.0333333	0	0	0	0	0	0	0	0	0	0	0	22.8748	26.4441	19.6379	19.8231	19.2743	18.4768	13.5752	10.8916	11.8835	9.87132	8.94275	9.12833	6.94766	8.3089	4.82801
64050	Yeats4	0.433013	0.166667	0	0	0	0	0	0	0	0	0	0	0	0	0	0	46.7741	45.2432	42.7498	37.1739	34.2554	29.9383	21.9944	25.2872	20.2882	17.6379	17.6178	15.9976	14.9752	11.6252	13.2834
66867	Hmg20a	0.582104	0.16	0	0	0.0733333	0.06	0.0633333	0	0	0	0	0	0	0	0	0	10.433	8.30429	8.17014	7.47646	6.49962	6.03976	5.11476	5.69133	5.37941	4.93435	4.4559	5.88501	3.64347	2.3598	3.14226
66923	Pbrm1	0.915545	0.2	0.196667	0.153333	0.133333	0.13	0.206667	0.0166667	0.0466667	0.13	0.0133333	0	0	0	0	0	11.2325	5.90106	12.1344	12.6994	5.86413	7.17255	3.9793	4.7006	5.71256	4.16518	2.59963	3.27406	2.85035	1.11116	1.43402
67367	Paxbp1	0.444666	0.103333	0.06	0.0466667	0.0633333	0.02	0.0633333	0	0	0	0.0133333	0.226667	0	0	0	0	13.2968	5.25741	11.2476	11.9279	5.20224	9.79586	7.78117	8.38832	7.68863	6.81568	6.76712	7.90589	3.5913	1.31544	4.7532
68094	Smarcc2	0.541555	0.656667	1.29333	1.54333	0.593333	0.54	0.346667	0.57	0.816667	0.27	0.166667	0.263333	0.21	0.123333	0.0366667	0.656667	24.9787	26.5557	23.8876	22.3948	22.6167	14.9087	16.1026	16.8748	18.6966	19.0474	19.0868	16.6882	13.9056	16.0312	15.4815
68750	Rreb1	0.537277	0.01	0	0.0533333	0	0	0	0	0	0	0	0	0	0	0	0	7.15604	5.47581	6.44848	5.96518	6.65259	3.60428	5.59506	2.61659	3.92341	5.87338	1.21813	1.47405	1.16723	3.06365	0
69257	Elf2	0.631159	0.03	0.0333333	0.0333333	0	0	0.0233333	0	0	0	0	0	0	0	0	0	21.1943	19.3112	18.603	19.949	16.097	12.4055	12.2927	10.383	9.2369	10.9475	9.78496	7.22743	4.96603	2.51315	4.96253
71268	Lrrfip2	0.439286	0.28	0.22	0.16	0.156667	0.07	0.19	0.13	0.303333	0.286667	0.123333	0.37	0.493333	0.333333	0.203333	0.57	10.7889	8.63923	9.60661	9.12509	6.5051	7.62422	6.76012	9.30528	7.72639	7.61096	7.80355	9.09675	9.44464	5.83552	8.78503
71702	Cdc5l	0.367857	0.92	0.566667	0.53	0.526667	0.46	0.423333	0.326667	0.426667	0.776667	0.54	0.96	0.596667	0.223333	0.106667	0.0933333	22.3425	17.0096	22.3541	19.715	12.5386	13.8877	10.6301	9.92127	9.86024	8.58598	8.04352	6.18526	5.06946	2.52969	3.51988
72567	Bclaf1	0.463744	0.603333	0.673333	0.406667	0.32	0.33	0.32	0.406667	0.323333	0.44	0.196667	0.323333	0.25	0.143333	0.0766667	0.103333	23.4928	7.47131	18.4501	17.1664	6.04864	12.2249	9.6674	9.93247	8.34906	8.42174	7.34018	9.04841	6.66423	1.42918	4.63883
74123	Foxp4	0.253546	0	0.01	0.00666667	0	0	0	0	0	0	0	0	0	0	0	0	22.2371	25.3739	16.1433	17.6375	21.2405	16.1351	18.9293	24.32	19.0961	18.4776	16.8405	13.5368	8.32797	11.3807	8.05836
77044	Arid2	0.779879	0.0566667	0.0366667	0.0266667	0.0366667	0.02	0	0	0	0	0	0	0	0	0	0	6.71561	4.85077	6.70335	6.02214	3.61815	4.84999	2.77269	3.99673	3.19979	2.34379	1.78074	2.12697	1.59886	0	0
77862	Thyn1	0.46711	0.243333	0.19	0.143333	0.106667	0.183333	0.106667	0.0866667	0	0.2	0.116667	0	0.196667	0	0	0.09	23.239	19.1016	18.626	14.9899	11.2138	10.7221	9.06717	9.01564	10.2895	7.31355	9.93858	7.77506	8.99529	9.34198	9.55987
78266	Zfp687	0.371154	0.03	0	0	0	0	0	0	0	0	0	0	0	0	0	0	8.40358	10.1799	7.44788	7.37959	6.4	5.24401	3.92827	4.35962	3.66869	3.36166	3.30997	2.35422	2.77112	2.8859	2.49542
93760	Arid1a	0.95947	0.186667	0.16	0.08	0.0766667	0.0833333	0.06	0.0266667	0.07	0.06	0.03	0.0466667	0	0	0	0	21.3442	21.0136	19.4767	16.2055	16.8623	12.1004	10.1531	12.4008	9.85488	9.19279	7.0838	6.14139	5.69269	3.90467	4.01347
93761	Smarca1	0.281022	0.2	0.18	0	0	0.08	0	0	0	0	0	0	0	0	0	0	2.11323	0	1.17567	1.53016	0	0	0	0	0	0	0	0	0	0	0
97165	Hmgb2	0.657143	174.283	41.3133	38.8267	47.6933	37.3333	85.4667	36.06	310.087	49.26	116.36	24.5933	17.8767	7.09333	1.07333	0.873333	180.622	127.728	207.037	185.806	102.179	125.85	80.5799	86.2213	69.5464	40.646	39.8498	14.8495	8.42582	1.16176	1.38066
98999	Znfx1	-0.774414	0	0.0166667	0	0.0133333	0.01	0	0.00666667	0	0.0166667	0.06	0.02	0.0866667	0.0433333	0.0433333	0.18	6.73032	6.53927	7.96492	6.54101	7.86988	6.26047	6.79744	6.76919	5.69204	5.24261	4.48536	3.79549	3.67977	6.31126	4.8824

## Sheet: TF_Profiling_TF_cor
Gene.ID	GeneSymbol	Correlation	E12.5_TF	E13.5_TF	E14.5_TF	E15.5_TF	E16.5_TF	E17.5_TF	E18.5_TF	D1_TF	D3_TF	D5_TF	W1_TF	W2_TF	W3_TF	W6_TF	W8_TF	E12.5_P	E13.5_P	E14.5_P	E15.5_P	E16.5_P	E17.5_P	E18.5_P	D1_P	D3_P	D5_P	W1_P	W2_P	W3_P	W6_P	W8_P
104394	E2f4	0.722914	116.12	263.81	312.28	281.22	194.92	145.72	77.59	45.08	69.46	70.42	79.88	42.33	31.75	48.64	27.65	0.966667	0.666667	0.196667	0.156667	0.22	0	0	0	0	0	0	0	0	0	0
108655	Foxp1	-0.185577	41.83	45.47	35.24	13.49	49.83	51.52	45.2	36.29	36.44	43.41	68.2	77.81	86.42	129.51	62.38	0.01	0	0	0	0	0	0	0	0	0	0	0	0	0	0
110794	Cebpe	-0.153061	0	0	0	16.51	0	0	0	0	0	23.28	0	0	0	0	0	0	0	0	0	0	0.0933333	0.0433333	0	0	0	0	0	0	0	0
11538	Adnp	0.601001	1.53	1.51	0	0	0	0	0	0	0	1.09	0	0	0	0	0	0.236667	0.193333	0.14	0.1	0.0866667	0.0666667	0.0666667	0.06	0.04	0.0766667	0.0433333	0.03	0.0366667	0	0
116848	Baz2a	-0.694384	5.8	6.16	4.64	6.78	6.64	10.81	16.94	12.36	10.8	21.71	22.59	6.61	38.99	55.4	6.81	0.00666667	0.0133333	0.0233333	0	0	0	0	0	0	0	0	0	0	0	0
116870	Mta1	-0.145479	11.57	3.81	1.97	1.23	0	0	5	0	0	2.72	0	4.01	5.31	9.52	1.13	0.44	0.316667	0.143333	0.22	0.12	0.163333	0.03	0.0433333	0.0966667	0.05	0.0833333	0.0533333	0.0266667	0	0.0233333
116871	Mta3	0.0324785	7.42	2.84	0	0	0	0	0	0	0	0	8.93	5.7	7.41	0	0	0.243333	0.186667	0.193333	0.0966667	0.103333	0.106667	0.05	0	0.0833333	0.12	0.08	0	0	0	0
11819	Nr2f2	0.0779194	395.1	179.42	137.16	55.6	89.76	96.83	34.41	66.72	66.84	81.86	211.7	241.11	302.73	327.71	180.91	0.28	0.03	0	0.0133333	0.01	0	0	0	0	0	0	0	0	0	0
11863	Arnt	0.124162	16.13	19.19	34.51	59.66	72.08	63.12	35.54	0	5.18	14.4	11.51	0	1.17	0.65	0	0	0.02	0	0	0	0	0	0	0	0	0	0	0	0	0
11908	Atf1	-0.104561	0	0	0	0	0	0	0	0	0	0	0	0	0	33.48	0	0.126667	0	0	0	0	0.09	0	0	0	0	0	0	0	0	0
12400	Cbfb	0.210289	0	37.24	83.59	102.14	87.4	85.97	112.14	65.72	30.67	0	92.51	0	0	0	0	0.72	0.366667	0.176667	0.296667	0.163333	0.313333	0.633333	0.356667	0.603333	0.65	0.316667	0	0	0	0
12607	Cebpz	0.269135	4.65	3.18	8.33	1.65	5.91	5.11	6.05	3.89	2.01	0.96	27.41	0	0.46	3.69	1.83	0.126667	0.18	0.103333	0.0733333	0.0566667	0.03	0.02	0.0266667	0.07	0.0133333	0	0	0	0	0
12912	Creb1	0.184017	451	106.35	57.66	0	0	0	0	0	35.49	76.88	39.5	127.64	43.78	162.9	113.77	0.29	0.283333	0.306667	0	0	0.213333	0.126667	0.14	0	0	0.133333	0.153333	0	0	0
13018	Ctcf	-0.261886	181.72	172.89	135.98	45.2	130.97	95.73	59.88	59.84	84.4	132.92	26.72	130.95	242.41	174.05	239.51	0.306667	0.146667	0.13	0.163333	0.14	0.116667	0.08	0.05	0.0166667	0.02	0.05	0.0333333	0	0	0
13047	Cux1	0.0972019	36.4	1	0	0	0	0	0	0	0	0	0	0.58	0.55	0	0	0.0233333	0	0.0133333	0	0.00666667	0	0.0233333	0	0	0	0	0	0	0	0
13418	Dnajc1	0.189157	0	0	0	0	0	0	0	0	0	0	0	0	0	0	20.33	0	0	0.0133333	0.0133333	0.0166667	0.05	0	0.0466667	0.12	0.166667	0.2	0.133333	0	0	0.106667
13496	Arid3a	0.761364	16.44	6.88	4.98	7.66	7.26	6.81	4.53	4.83	2.42	3.39	0	0	0	0	0	0.136667	0.0566667	0.07	0.08	0.06	0.08	0.03	0.106667	0.103333	0	0	0	0	0	0
14011	Etv6	0.346939	81.96	2.01	0	0	0	0	0	0	0	0	0	0	0	0	0	0	0.0133333	0	0.0166667	0	0	0	0	0	0	0	0	0	0	0
14025	Bcl11a	0.89771	12.33	8.74	9.03	0	0	0	0	0	0	0	0	0	0	0	0	0.17	0.0533333	0.0566667	0	0.0433333	0	0	0	0	0	0	0	0	0	0
14390	Gabpa	0.452022	470.37	426.07	341.37	152.24	286.16	237.55	203.31	236.09	123.72	174.52	398.92	211.21	278.72	311.46	166.35	0.36	0.29	0.25	0.226667	0.186667	0.186667	0.0966667	0.06	0.16	0.13	0.196667	0.12	0	0	0
14391	Gabpb1	0.0714807	160.2	160.29	137.82	116.32	282.68	261.41	399.41	332.69	235.92	224.7	216.87	90.88	116.1	234.25	113.83	0.12	0.0533333	0	0	0.0733333	0	0	0	0	0	0	0	0	0	0
14582	Gfi1b	0.220963	56.06	23.53	30.68	0	105.42	60.54	0	0	0	0	0	0	0	0	0	0	0.0433333	0	0	0	0	0	0	0	0	0	0	0	0	0
14815	Nr3c1	0.752325	0	0.93	2.6	0	0	2.72	1.27	0.61	0	3.86	3.16	31.25	35.28	36.03	25.08	0	0.0133333	0.0166667	0.0266667	0	0.02	0.0333333	0	0	0.0966667	0	0.26	0.223333	0.0466667	0.03
14886	Gtf2i	0.623771	176.96	92.9	73.08	25.17	74.3	50.92	44.6	43.41	56	56.84	37.06	37.27	67.61	31.99	5.39	1.25333	0.966667	0.85	0.673333	0.64	0.696667	0.633333	0.353333	0.673333	0.283333	0.6	0.39	0.473333	0.3	0.0566667
15354	Hmgb3	0.832143	10885.2	12021.9	15019.2	14017.5	12810.7	13621.5	7708.64	5838.65	4855.33	2527.16	3171.34	1659.54	2107.18	1483.74	1322.92	8.96667	5.28333	5.64	3.60667	5.17667	2.71667	3.21	3.97667	3.07333	1.17	1.93333	0.953333	1.18667	0.24	0
15364	Hmga2	0.486904	11696	3246.37	2563.35	1568.16	920.36	1407.75	3074.69	3119.55	1091.84	1177.14	1786.99	514.79	558.95	461.14	236.39	9.63667	1.52667	0.303333	0	0.313333	0.176667	0	0	0	0	0	0	0	0	0
15378	Hnf4a	0.504926	301.28	330.18	308.01	211.62	485.11	348.48	272.05	305.68	288.1	281.37	1327.78	2082.54	2212.7	3202.86	2712.97	0	0.05	0.0433333	0	0.0833333	0.08	0.0533333	0.113333	0.11	0.17	0.08	0.176667	0.246667	0.156667	0.11
16549	Khsrp	-0.318998	0	16.68	11.49	0	4.66	26.02	0	3.15	5.18	9.82	22.7	39.19	28.57	61.72	50.08	7.78	7.85667	6.35333	5.95667	5.03	5.94	4.65667	4.94333	7.84667	5.50333	6.12667	5.78	4.74667	3.07333	2.69333
16969	Zbtb7a	0.355787	11.54	33.89	30.97	12.77	0	0	0	0	0	0	0	0	0	1.66	2.25	0.126667	0.11	0.113333	0.07	0.18	0.0766667	0	0	0.0266667	0.0833333	0	0	0.0433333	0	0
16978	Lrrfip1	0.484149	0	0	0	0	0.75	1.74	2.02	0	1.25	1.65	1.56	5.31	5.19	4.52	6.22	0.116667	0.123333	0.226667	0.106667	0.136667	0.17	0.23	0.243333	0.503333	0.36	0.636667	0.333333	0.493333	0.326667	0.226667
17002	Ltf	0.874172	0	0	0	3.26	31.31	63.47	174.88	47.3	15.67	45.21	18.48	0	0	0	0	0.00666667	0.153333	2.40333	1.64667	2.49333	7.21333	10.39	2.48333	2.75667	4.01	2.31333	0.16	0.0633333	0	0
17089	Lyar	-0.329731	35.47	33.21	35.36	38.84	130.76	70.32	164.98	122.57	145.94	176.55	5.83	94.49	75.14	67.84	94.32	1.08	0.526667	0.13	0.0566667	0.11	0.07	0.0566667	0	0.0466667	0	0	0	0	0	0
17127	Smad3	-0.287494	1.29	0	1.53	0	0	0	1.97	0	3.51	2.1	0	2.96	3.73	1.63	3.08	0	0.0366667	0	0	0	0	0	0	0	0	0	0	0	0	0
17129	Smad5	-0.0714286	0	0	0	0	0	0	5.17	0	0	0	0	0	0	0	0	0	0	0	0	0.0133333	0	0	0	0	0	0	0	0	0	0
17134	Mafg	-0.247436	215.51	91.58	107.39	95.52	107.49	93.23	203.87	166.38	220.37	294.25	169.3	424.31	444.35	344.33	325.71	0	0	0.0266667	0	0	0	0	0	0	0	0	0	0	0	0
17187	Max	0.392393	1161.3	1163.02	770.38	457.14	751.61	719.58	743.36	565.89	780.09	905.98	900.55	717.22	720.72	539.01	598.37	0	0.116667	0.24	0	0	0	0	0	0	0	0	0	0	0	0
17188	Maz	0.201678	171.06	154.98	72.83	29.94	134.38	84.85	40.33	52.1	73.89	68.45	86.86	83.72	86.48	89.46	39.02	0.0866667	0	0	0.03	0.0266667	0	0	0	0	0	0	0	0	0	0
17190	Mbd1	-0.00536365	22.13	10.14	15.71	0	0	0	3.76	0	10.85	21.6	6.28	56.16	50.65	51.31	22.02	0.133333	0.03	0.0466667	0.04	0	0	0	0	0.0133333	0	0	0	0	0	0
17191	Mbd2	-0.241151	14.42	8.48	10.42	28.06	25.75	23.9	23.07	14.42	9.59	9.9	27.47	16.15	24.37	50.41	15.79	0.223333	0.983333	0.11	0.193333	0.173333	0.446667	0	0.05	0.04	0	0	0	0	0	0
17192	Mbd3	0.00404358	80.16	48.17	0	0	0	0	0	0	0	0	1.97	4.05	5.99	2.65	0	0.51	0.546667	0.333333	0.343333	0.136667	0.106667	0.12	0.0733333	0.193333	0.06	0.0633333	0.0466667	0	0	0
17257	Mecp2	0.568457	338.1	178.52	162.17	133.58	167.21	231.68	403.8	592.45	783.96	1105.75	997.41	1833.15	2190.13	2316.82	1866.83	0.0166667	0	0	0	0	0	0.0333333	0.03	0.09	0.0866667	0.0633333	0	0	0.0966667	0.04
17261	Mef2d	-0.585451	12.01	28.32	13.79	0	31.44	36	36.45	35.78	29.61	33.93	21.8	33.83	43.24	37.43	58.89	0.01	0.0166667	0.0133333	0.00666667	0	0	0	0.01	0	0	0	0	0	0	0
17268	Meis1	0.51558	53.77	22.81	6.34	0	4.38	3.69	0	0	0	0	0	0	0	0	0	0.0333333	0	0	0	0	0	0	0	0	0	0	0	0	0	0
17425	Foxk1	-0.580905	25.09	59.72	32.96	33.32	63.27	71.66	63.48	65.88	66.64	108.34	131.42	121.85	167.29	118.85	97.03	0.0366667	0.0133333	0.02	0.02	0	0	0.0166667	0.0133333	0.03	0.04	0	0	0	0	0
17876	Myef2	-0.618385	87.56	7.42	0	0	0	0	0	0	18.38	7.23	9.03	220.86	295.91	343.15	217.4	0.436667	0.44	0.26	0.296667	0.366667	0.196667	0.223333	0.1	0	0.173333	0.0733333	0.0633333	0.0466667	0	0.07
18027	Nfia	0.861911	249.81	128.46	110.08	153.1	273.78	465.18	563.42	955.23	1110.71	1372.56	2321.73	4224.91	4073.58	4317.82	4929.76	0	0	0	0	0	0	0	0.0233333	0	0.0566667	0.0466667	0.173333	0.213333	0.08	0.0733333
18028	Nfib	0.901967	346	184.55	185.25	201.93	380.41	543.27	702.39	1163.75	1262.93	1680.18	3063.49	3853.4	3647.18	3756.44	4132.27	0	0	0	0	0	0.02	0.0233333	0.0266667	0.0466667	0.23	0.16	0.323333	0.33	0.163333	0.143333
18029	Nfic	0.890964	197.27	137.8	97.15	104.14	197.94	301.95	349.83	606.66	906.37	1038.23	2649.19	4214.28	4026.54	4204.97	5166.29	0	0	0	0	0	0	0	0	0.0233333	0.05	0.176667	0.0866667	0.22	0.0666667	0.256667
18032	Nfix	0.495019	123.47	95.42	84.81	98.29	184.86	278.85	306.78	534.62	627.32	686.62	2123.03	3416.04	3169.17	3595.81	3433.7	0	0	0	0	0	0	0	0	0	0	0	0.13	0	0	0.0333333
18033	Nfkb1	-0.333787	2.18	2.39	4.76	6.04	4.75	7.68	0	0	0	0	9.47	0	0	8.19	17.3	0.0233333	0.0566667	0.0166667	0.0166667	0.0266667	0.316667	0.18	0.18	0.206667	0.05	0.0966667	0.546667	0.0233333	0	0.0533333
18034	Nfkb2	-0.104561	0	0	0	0	0	0	0	0	0	0	0	0	0	1.5	0	0.00666667	0	0	0	0	0	0	0	0	0	0.0233333	0	0	0	0
18044	Nfya	0.458349	2924.26	2227.95	2459.54	676.51	1226.94	638.77	486.09	847.79	1773.01	1553.84	2297.28	1030.1	990.36	1041.83	648.32	0.166667	0.333333	0.103333	0.113333	0	0	0	0	0	0	0	0	0	0	0
18046	Nfyc	0.371154	7585.44	6921.3	5834.06	1302.81	3568.48	1629.11	1813.05	3090.38	6763.1	6042.42	4622.3	3857.55	3429.11	3107.71	2562.51	0	0.413333	0	0	0	0	0	0	0	0	0	0	0	0	0
18181	Nrf1	0.0452203	262.06	648.66	884.36	851.39	1507.45	1086.7	1182.7	1024.95	691.57	785.53	867.37	401.89	389.39	424.04	352.23	0.463333	0.38	0.18	0.146667	0.306667	0	0	0.116667	0.186667	0	0.116667	0	0	0	0
18515	Pbx2	0.585571	82.05	50.03	23.62	2.34	10.76	7.22	6.99	2.02	3.28	2.55	18.44	8.68	12.13	16.03	2.05	0.0766667	0.106667	0	0	0	0	0	0	0	0	0	0	0	0	0
18673	Phb	0.746429	31.61	40.08	112.24	102.59	58.56	100.53	133.47	53.88	132.12	285.75	138.22	250.9	273.05	173.78	202.45	8.27333	8.45	8.62333	6.95	7.21	12.08	12.09	19.4233	32.9067	28.9867	39.3967	50.31	36.4567	32.2933	23.4533
18986	Pou2f1	0.469668	5.21	21.94	69.89	34.91	83.78	16.39	23.87	0	0	0	0	0	0	0	0	0	0	0	0	0.0566667	0	0	0	0	0	0	0	0	0	0
19130	Prox1	-0.21414	4.12	17.14	21.82	51.37	53.55	55.46	52.79	29.5	14.86	36.72	73.01	101.89	97.71	118.38	53.98	0	0.0466667	0.0433333	0.0233333	0.0433333	0	0.07	0	0.1	0.383333	0.45	0	0	0	0.286667
19290	Pura	0.906978	7.7	25.95	43.93	10.87	92.39	45.92	88.49	156.07	215.67	532.63	426.15	1030.24	867.32	1366.97	975.1	0.0733333	0	0.0733333	0.12	0.24	0	0.236667	0.333333	1.41	0.666667	1.88333	2.67667	2.48667	2.06	1.70333
19291	Purb	0.720286	86.17	107.56	96.76	48.61	256.96	171.35	212.46	373.97	305.98	450.39	366.62	619.14	616.91	844.38	671.14	0.51	0.406667	0.42	0.463333	0.406667	0.53	0.61	0.466667	0.556667	0.986667	0.913333	1.27667	1.74	0.77	0.833333
19664	Rbpj	-0.0605055	250.06	335.6	238.63	228.5	346.95	418.24	321.58	250.02	198.58	221.69	229.58	267.31	270.48	235.13	267.46	0.0966667	0	0.103333	0.0333333	0.0466667	0.03	0	0	0.0333333	0	0	0	0	0	0
20024	Sub1	0.0678571	2170.42	4071.29	2320.87	1319.36	5307.26	7526.94	7078.84	6774.37	11053.4	11970.2	4299.73	5858.31	5588.86	3916.86	5269.21	10.1633	9.65	8.9	6.29	7.98333	11.0133	4.74333	9.38667	9.83333	5.04667	8.24333	9.94333	6.15	3.47	2.93333
20181	Rxra	0.716701	78.12	65.68	67.14	31.48	84.86	105.71	81.98	106.89	133.5	202.85	478.98	783.75	954.7	1389.99	989.21	0	0	0	0	0.0233333	0	0.02	0	0	0.0533333	0.0666667	0.133333	0.04	0.0233333	0.04
20185	Ncor1	-0.343762	0	0	0	0	0	0	0	0	0	0	0	0	0	1.63	0.76	0.0666667	0.0266667	0.273333	0.04	0.0633333	0.0233333	0	0	0.01	0	0	0	0	0	0
20588	Smarcc1	-0.178571	41.01	34.92	23.95	10.37	10.88	16.43	10.83	8.81	17.46	35.23	30.94	29.48	37.95	40.08	21.53	0.756667	0.813333	0.576667	0.4	0.513333	0.47	0.166667	0.19	0.29	0.163333	0.136667	0.0733333	0.06	0	0.03
20602	Ncor2	-0.104561	0	0	0	0	0	0	0	0	0	0	0	0	0.47	14.19	0	0.0133333	0	0	0	0	0	0	0	0	0	0	0	0	0	0
20658	Son	-0.0679786	21.18	45.58	119.62	30.21	98.59	54.43	32.22	51.26	51.73	112.57	96.7	65.7	35.34	36.88	47.75	0.5	0.486667	0.313333	0.286667	0.263333	0.22	0.116667	0.306667	0.313333	0.3	0.22	0.266667	0.0966667	0.273333	0.4
20679	Sox6	0.71493	66.77	44.67	11.3	0	0	0	0	0	0	0	10.1	0	0	0	0	0.0766667	0.05	0.0333333	0.0133333	0.00666667	0	0	0	0	0	0	0	0	0	0
20684	Sp100	0.51689	0	0	0	0	0	0	0	0	0	0	13.72	0	0	0	0	0	0	0	0	0	0	0.0366667	0	0.0366667	0.0233333	0.07	0	0.0233333	0	0
20687	Sp3	0.568861	423.05	339.9	341.94	186.12	201.79	0	0	99.97	178.7	165.83	157.08	195.15	245.23	143.18	90.6	0.0833333	0.06	0	0.0766667	0.0566667	0	0	0	0	0	0	0	0	0	0
20833	Ssrp1	0.385714	80.65	52.06	89.78	44.04	101.36	18.75	82.39	83.48	20.43	62.95	37.82	27.2	3.08	14.97	0	3.51667	4.46	3.43333	2.43333	2.39	2.07333	1.40667	1.24333	1.84333	1.27	1.71	1.29667	1.77333	0.336667	0.536667
20846	Stat1	0.405908	0	0	0	0	0	0	0	0	2.03	0	0	0	0.43	0.77	0	0.246667	0.353333	0.423333	0.343333	0.3	0.493333	1.45	1.16333	1.88667	6.78	4.94	2.26	2.85667	2.46333	1.65667
20847	Stat2	0.590871	0	0	0	0	0	0	0	0	0	0	0	1.05	1.5	0	0	0	0	0.03	0	0.0166667	0	0.0766667	0.08	0.18	0.203333	0.216667	0.28	0.27	0.09	0.246667
20848	Stat3	0.727393	0	0	0	0	0	34.66	26.45	31.16	33.35	53.9	3.74	56.08	15.39	20.52	75.56	0.263333	0.24	0.436667	0.36	0.413333	0.543333	0.78	0.71	1.61	1.73333	1.44	1.25	1.06	0.46	0.856667
20851	Stat5b	-0.247509	0	0	0	0	0	0	0	0	0	0	0	0	0	8.44	1.55	0.23	0.176667	0.24	0.22	0.216667	0.28	0.27	0.226667	0.316667	0.346667	0.466667	0.793333	0.386667	0.276667	0.133333
208968	Zfp280c	0.716316	2.2	1.73	0	0	0	0	0	0	0	0	3.73	0	0	0	0	0.0133333	0.01	0	0	0	0	0	0	0	0	0	0	0	0	0
209446	Tfe3	-0.0638877	33.06	6.05	0	0	0	0	0	0	8.49	13.03	23.69	16.3	21.61	40.1	21.67	0	0.03	0	0	0	0	0	0	0	0	0	0	0	0	0
213054	Gabpb2	-0.342086	145.94	199.88	265.84	206.77	363.74	232.97	288.7	246.51	278.33	236.07	336.36	212.5	203.29	155.22	154.38	0.0466667	0.07	0.0166667	0	0	0	0	0	0	0	0	0	0	0	0
21349	Tal1	0.886347	170.32	184.4	95.16	39.59	71.66	64.22	30.36	0	37.8	15.56	0	0	0	0	0	0.97	0.216667	0.396667	0.1	0.0666667	0.07	0	0	0	0	0	0	0	0	0
21406	Tcf12	0.551915	16.32	17.87	8.19	6.5	8.22	6.03	10.4	7.78	3.93	7.25	0	0.92	2.14	0.97	0	0	0.12	0.0666667	0	0.00666667	0	0	0	0	0	0	0	0	0	0
21423	Tcf3	0.639554	95.68	47.88	27.75	13.83	33.61	30.08	15.96	24.59	14.28	0	14.35	0	0	0	0	0.116667	0.0433333	0.0666667	0.0433333	0.0266667	0	0	0	0	0	0	0	0	0	0
21428	Mlx	0.433013	52.07	114.6	122.51	123.48	176.95	237.31	228.26	213.57	381.83	520.8	392.35	1409.94	1442.33	1716.11	2701.87	0	0	0	0	0	0	0	0	0	0	0	0	0	0	0.1
21429	Ubtf	0.678571	2482.03	1871.22	2398.36	803.05	1163.81	805.95	949.32	1163.93	469.42	662.45	935.15	455.17	745.69	726.45	351.83	1.80667	1.48667	0.82	0.973333	0.736667	0.833333	0.39	0.613333	0.783333	0.34	0.346667	0.333333	0.163333	0.0666667	0.09
214742	Rcor3	0.0638877	0	0	0	0	9.05	0	0	5.14	19.68	37.42	26.57	55.35	59.53	48.21	35.41	0	0	0	0	0	0	0	0	0.0666667	0	0	0	0	0	0
21750	Terf2	0.434568	12.95	9.84	11.47	7.87	3.93	1.29	6.64	6.09	4.77	4.51	0	1.42	4.61	0	0	0.00666667	0	0	0	0	0	0	0	0	0	0	0	0	0	0
21780	Tfam	0.892857	3848.79	2033.66	1215.98	1246.83	1885.69	2970.41	4712.62	7023.71	7475.37	11305.2	11158.2	22315.4	20383.6	22205.9	27915.5	0.533333	0.366667	0.2	0.493333	0.316667	0.636667	1.12	1.03333	1.77667	1.65333	2.63	2.34667	3.05667	2.48667	2.09
21781	Tfdp1	0.738038	60.27	49.83	58.92	29.89	35.79	37.89	21.48	14	0	0	32.04	0	3.67	4.07	0	0.78	0.213333	0.07	0.156667	0.0133333	0	0	0	0	0	0	0	0	0	0
217864	Rcor1	-0.669202	154.28	116.04	53.52	11.27	49.33	58.78	34.26	38.45	68.05	140.55	409.87	235.88	306.02	278.07	239.55	0.6	0.52	0.29	0.19	0.15	0.143333	0.176667	0.146667	0.05	0.0733333	0	0	0	0	0
219150	Hmbox1	-0.0883263	25.83	7.35	0	0	0	0	0	0	11.64	25.29	17.82	33.73	49.23	39.47	6.84	0	0.01	0	0.0133333	0	0	0	0	0	0	0.05	0	0	0	0
22130	Ttf1	-0.184136	0.68	1.69	0	0	0	0	0	0	0	0	0	0	2.12	12.05	4.63	0	0	0.00666667	0	0	0	0	0	0	0	0	0	0	0	0
22221	Ubp1	-0.0161146	455.64	69.33	9.71	0	6.38	17.2	0	7.54	5.08	22.99	19.12	325.19	329.75	356.44	279.11	0.183333	0.103333	0.116667	0.0966667	0.0866667	0.07	0.01	0.0133333	0.0233333	0.0566667	0.04	0	0	0.0366667	0.04
22278	Usf1	-0.138847	479.78	243.98	226.23	147	169.68	154.48	131.77	169.74	10.07	23.37	335.28	114.76	150.25	258.85	136.98	0	0	0	0.0733333	0	0	0	0	0	0	0	0	0.03	0	0
223922	Atf7	0.187256	36.19	11.48	17.96	8.99	6.47	18.76	7.35	3.37	0	0	0	0	7.28	43.98	3.53	0	0.0166667	0	0	0	0	0	0	0	0	0	0	0	0	0
22404	Wiz	0.261649	120.5	24.49	7.48	0	0	0	0	0	3.42	4.46	0	7.84	20.68	14.28	12.26	0.0566667	0.0566667	0.0133333	0.0166667	0.0266667	0	0	0	0	0	0	0	0	0	0
224481	Tfb1m	-0.113924	0	0	0	0	0	0	4.8	0	0	0	17.45	6.48	9.06	1.97	0	0	0.0366667	0.0333333	0	0	0.05	0	0	0.14	0	0	0.2	0	0	0
22608	Ybx1	0.269884	1906.84	1919.79	1045.8	531.06	773.92	537.98	786.69	1067.27	2345.33	2564.92	1831.25	2820.62	1592.69	905.59	1141.67	15.4633	11.5333	8.30667	4.76	4.53333	4.53333	5.87333	5.89	7.55	5.71333	4.76333	3.76667	7	3.92667	2.71
22632	Yy1	-0.189368	410.79	681.24	353.71	137.51	284.72	278.65	84.06	113.98	355.59	373.78	227.69	755.21	687.26	740.22	709.41	0.226667	0.103333	0.183333	0.06	0.0533333	0	0.02	0	0	0	0	0	0	0	0
22661	Zfp148	-0.107221	135.51	47.04	16.01	0	8.14	13.86	17.59	26.72	75.78	104.35	69.04	241.56	244.68	222.66	151.47	0.08	0.0566667	0	0	0.03	0	0	0	0	0	0	0	0	0	0
226747	Ahctf1	-0.0546596	373.17	99.42	40.32	10.22	7.78	7.78	8.94	10.85	87.92	51.73	61.19	161.58	243.58	231.43	94.7	0.19	0.11	0.0866667	0.0733333	0.07	0.04	0.0266667	0.0266667	0.0533333	0.05	0.0866667	0.04	0.01	0	0.02
22680	Zfp207	0.236221	11.03	10.01	0	0	0	0	0	0	0	0	0	6.29	17.83	6	0	0.433333	0.44	0.333333	0.22	0.136667	0.183333	0.243333	0.223333	0.176667	0.386667	0.176667	0.426667	0.133333	0.11	0
22761	Zfpm1	0.344656	19.7	13.2	6.18	0	1.51	0	1.43	0	0	0	0.38	4.42	5.62	12.5	14.74	0.22	0.13	0.0966667	0.04	0.0633333	0.0266667	0	0	0	0	0	0	0	0	0
22778	Ikzf1	0.476351	43.6	22.79	13.65	0	7.65	0	0	4.19	12.29	8.23	0	0	0	0	0	0.303333	0.17	0.15	0.233333	0.186667	0.05	0	0	0	0	0	0	0	0	0
22791	Dnajc2	0.720435	4.51	6.59	15.79	7.16	12.15	8.74	3.46	4.38	8.81	6.02	0	0.85	1.04	0	0	0.863333	0.543333	0.15	0.47	0.213333	0.193333	0.106667	0.18	0.19	0.143333	0.12	0.08	0.133333	0.0466667	0.06
229004	Gmeb2	-0.132652	0	4.35	0	0	0	0	0	0	0	0	0	0	0	0	0	0.05	0	0	0.0366667	0.01	0	0	0	0	0	0	0	0	0	0
229542	Gatad2b	-0.216159	19.36	5.18	0	0	0	0	0	0	0	0	3.93	9.49	10.71	11.96	1.27	0.36	0.276667	0.243333	0.246667	0.226667	0.15	0.08	0.0766667	0.123333	0.0533333	0.08	0	0	0	0
229663	Csde1	-0.273158	0	0	2.8	0	0	0	0	0	0	0	0	0	0	2.6	0.86	3.27667	2.95333	1.68667	1.48667	1.68	1.46667	0.746667	1.55667	2.3	2.54667	3.15	2.44667	2.6	0.836667	2.10333
233410	Zfp592	-0.158777	0	0	0	0	0	0	0	0	0	0	0	3.21	4.1	7.76	3.43	0	0	0.00666667	0	0	0	0	0	0	0	0	0	0	0	0
238247	Arid4a	-0.132652	8.63	0	0	0	0	0	0	0	0	0	0	0	0	0	0	0	0.02	0.01	0.0433333	0	0	0	0	0	0	0	0	0	0	0
238317	Elmsan1	0.107819	13.72	4.91	0	0	0	0	0	0	0	0	0	4.47	7.56	2.41	0	0	0.01	0.0233333	0	0	0	0	0	0	0	0	0	0	0	0
23942	Mta2	-0.121537	28.3	16.89	11.58	13.61	12.69	17.37	20.51	10.49	17.95	21.03	26.14	27.57	41.64	41.71	26.4	1.37667	0.846667	0.58	0.58	0.57	0.303333	0.44	0.516667	0.833333	0.803333	0.103333	1.27333	0.313333	0.31	0.0766667
239985	Arid1b	-0.61393	0	0	0	0	0	0	0	0	1.54	3.26	2.1	6.26	6.54	6.34	2.87	0.07	0.0666667	0.01	0.01	0.00666667	0.01	0	0	0.0233333	0	0	0	0	0	0
24136	Zeb2	0.464835	17.88	6.21	4.31	0	4.95	4.46	1.01	1.67	3.19	9.81	11.17	8.7	4.62	3	2.21	0.0166667	0.01	0	0	0	0	0	0	0	0	0	0	0	0	0
244216	Zfp771	-0.132652	0	0	4.82	0	0	0	0	0	0	0	0	0	0	0	0	0.0366667	0.0266667	0	0	0	0	0	0	0	0	0	0.0166667	0	0	0
268741	Tox4	-0.335245	20.01	19.21	0	0	0	0	0	0	13.42	11.03	1.03	15.76	35.73	9.74	11.26	0.196667	0.103333	0.14	0.103333	0.103333	0.103333	0.0433333	0.0666667	0.0366667	0.0533333	0.0166667	0	0	0	0
269639	Zfp512	0.185577	60.15	39.69	32.76	13.3	19.09	26.41	28.86	78.01	20.84	21.64	39.56	87.83	104.83	117.28	38.39	0.156667	0	0	0	0	0	0	0	0	0	0	0	0	0	0
320799	Zhx3	0.519084	0	0	0	0	0	0	0	0	0	0	0	11.52	23.62	54.43	19.42	0	0	0	0	0	0	0	0	0	0	0	0.0666667	0	0	0.02
50794	Klf13	0.185577	44.16	72.01	42.29	0	40.12	19.01	30.55	62.45	37.04	34.46	31.66	33.86	53.71	25.34	3.83	0	0	0.13	0	0	0	0	0	0	0	0	0	0	0	0
50907	Preb	0.49151	0	0	5.84	17.77	34.82	111.22	61.46	12.36	10.77	33.67	86.43	25.45	17.75	23.49	44.39	0.116667	0.126667	0.303333	0.233333	0.36	0.506667	0.77	0.713333	1.45	1.46	2.03667	1.01667	0.79	0.81	0.996667
54131	Irf3	0.189286	29.98	46.55	43.22	33.92	63.42	94	135.28	55.8	79.98	117.47	61.88	222.4	179.38	349.3	507.56	0.366667	0.306667	0.37	0.196667	0.186667	0.28	0.253333	0.21	0.336667	0.396667	0.273333	0.193333	0.58	0.316667	0.376667
54367	Zfp326	0.279847	1.26	0	0	0	0	0	0	0	0	0	0	9.14	12.03	11.63	5.38	0.133333	0.123333	0.0866667	0.0566667	0.0633333	0.0833333	0.0766667	0.0966667	0.12	0.13	0.163333	0.216667	0.156667	0.03	0.12
54380	Smarcal1	0.247509	7.65	41.74	68.79	55.53	113.85	85.77	56.4	49.8	33.51	10.05	24.27	49.22	7.54	39.58	60.57	0	0.01	0	0	0.00666667	0	0	0	0	0	0	0	0	0	0
56218	Patz1	0.39123	47.37	31.54	13.13	0	9.11	11.64	0	0	0	0	0	21.76	15.21	11.11	0	0	0.01	0	0	0	0	0	0	0	0	0	0	0	0	0
56449	Ybx3	0.3	576.59	935.94	858	362.04	524.53	518.41	481.17	547.05	961.32	904.75	930.57	802.59	475.25	303.47	307.82	8.70333	4.84333	3.46667	3.77667	2.91	2.32	3.34	2.06667	3.01	1.72333	2.10333	1.69667	2.54667	0.79	0.643333
56469	Pias1	-0.117202	4	3.2	4.7	0	0	0	0	0	6.56	15.3	8.66	0	4.81	13.98	4.6	0	0	0.01	0.01	0	0	0	0	0	0	0	0	0	0	0
56484	Foxo3	0.852505	2.46	32.54	33.81	54.69	68.51	39.99	24.11	8.69	0	0	0	0	0	0	0	0.0166667	0.04	0.06	0.04	0.0466667	0.0233333	0	0	0	0	0	0	0	0	0
56490	Zbtb20	0.74593	0	0	0	0	0	0	0	0	0	5.9	24.02	418.5	354.43	1029.59	718.63	0	0	0	0	0	0	0	0	0	0	0	0	0.0333333	0.0966667	0.246667
56809	Gmeb1	0.263416	0	5.81	0	0	0	3.43	0	0	0	0	0	0	0	0	0	0.0333333	0.11	0	0.0366667	0.116667	0	0	0	0	0	0	0	0	0	0
57376	Smarce1	-0.253571	44.14	31.6	23.2	3.55	16.32	10.99	6.74	14.28	49.38	62.03	66.61	59.42	95.03	96.32	55.38	0.82	0.616667	0.463333	0.313333	0.196667	0.25	0.24	0.163333	0.266667	0.203333	0.276667	0.256667	0.223333	0	0.0666667
58180	Hic2	-0.0714286	36.66	0	0	0	0	0	0	0	0	0	0	0	0	0	0	0	0	0.29	0	0	0	0	0	0	0	0	0	0	0	0
58805	Mlxipl	0.687524	10.44	21.05	19.31	20.01	27.72	33.47	31.01	28.76	60.62	86	105.7	313.38	285.13	516.75	557.27	0	0	0	0	0	0	0	0	0	0.0166667	0	0	0.0266667	0.16	0.0666667
59004	Pias4	0.417101	59.94	37.8	0	0	0	3.08	2.63	0	0	0	0	4.29	4.97	22.33	1.27	0.0366667	0.05	0	0.0333333	0	0	0	0	0	0	0	0	0	0	0
64050	Yeats4	0.627364	5.77	6.83	0	0	0	0	0	0	0	0	0	0	0	0	0	0.166667	0	0	0	0	0	0	0	0	0	0	0	0	0	0
66867	Hmg20a	-0.392239	82.64	82.46	8.78	0	32.67	0	6.85	6.55	114.52	162.6	208.2	193.01	211.18	50.31	25.9	0.16	0	0	0.0733333	0.06	0.0633333	0	0	0	0	0	0	0	0	0
66923	Pbrm1	-0.518748	18.4	24.6	12.2	6.31	14.41	11.42	11.11	6.64	29.88	28.2	26.08	31.65	43.99	32.96	13.96	0.2	0.196667	0.153333	0.133333	0.13	0.206667	0.0166667	0.0466667	0.13	0.0133333	0	0	0	0	0
67367	Paxbp1	-0.261079	0	0	0	0	0	0	0	0	0	0	0	1.78	0	0	0	0.103333	0.06	0.0466667	0.0633333	0.02	0.0633333	0	0	0	0.0133333	0.226667	0	0	0	0
68094	Smarcc2	-0.571939	26.69	30.69	18.34	2.05	8.26	5.83	11.59	14.9	49.63	97.93	45.17	155.68	152.69	132.1	86.66	0.656667	1.29333	1.54333	0.593333	0.54	0.346667	0.57	0.816667	0.27	0.166667	0.263333	0.21	0.123333	0.0366667	0.656667
68750	Rreb1	-0.205252	42.38	22.3	9.22	8.26	10.57	19.73	15.16	11.51	15.88	32.66	52.7	75.04	74.05	73.93	86.36	0.01	0	0.0533333	0	0	0	0	0	0	0	0	0	0	0	0
69257	Elf2	-0.0114756	67.21	51.25	88.58	57.91	71.91	55.72	57.9	66.72	52.28	48.34	78.74	78.9	97.17	88.16	24.59	0.03	0.0333333	0.0333333	0	0	0.0233333	0	0	0	0	0	0	0	0	0
71268	Lrrfip2	0.232143	10.88	164.69	165.67	2.28	197.98	293.82	101.02	161.73	53.63	502.41	27.07	613.17	562.49	331.59	1283.86	0.28	0.22	0.16	0.156667	0.07	0.19	0.13	0.303333	0.286667	0.123333	0.37	0.493333	0.333333	0.203333	0.57
71702	Cdc5l	-0.410714	13.73	3.82	13.63	0	15.48	11.01	16.73	34.57	19.34	33.29	9.21	279.96	181.82	91.04	184.93	0.92	0.566667	0.53	0.526667	0.46	0.423333	0.326667	0.426667	0.776667	0.54	0.96	0.596667	0.223333	0.106667	0.0933333
72567	Bclaf1	-0.179376	41.54	4.55	7.99	0	1.9	0	0	2.18	0	0	0	7.35	9.14	12.1	17.42	0.603333	0.673333	0.406667	0.32	0.33	0.32	0.406667	0.323333	0.44	0.196667	0.323333	0.25	0.143333	0.0766667	0.103333
74123	Foxp4	0.0484679	3.96	4.42	3.99	3.32	4.71	0	1.6	0	2.87	0	32.65	10.67	11.43	23.66	15.14	0	0.01	0.00666667	0	0	0	0	0	0	0	0	0	0	0	0
77044	Arid2	-0.0383547	6.01	6.79	2.03	0	0.62	0	0.46	0.69	5.12	5.78	3.94	5.3	8.04	6.98	2.47	0.0566667	0.0366667	0.0266667	0.0366667	0.02	0	0	0	0	0	0	0	0	0	0
77862	Thyn1	0.0165295	157.25	95.37	8.6	0	0	0	0	0	71.67	65.96	69.48	173.48	220.28	289.42	232.89	0.243333	0.19	0.143333	0.106667	0.183333	0.106667	0.0866667	0	0.2	0.116667	0	0.196667	0	0	0.09
78266	Zfp687	0.383326	5.86	8	0	0	0	0	0	0	3.58	3.37	4.54	3.44	4.61	2.3	0.45	0.03	0	0	0	0	0	0	0	0	0	0	0	0	0	0
93760	Arid1a	-0.0685336	19.03	12.53	11.73	9.46	9.45	10.27	4.84	2.93	11	15.37	11.04	13.32	16.71	16.38	7.88	0.186667	0.16	0.08	0.0766667	0.0833333	0.06	0.0266667	0.07	0.06	0.03	0.0466667	0	0	0	0
93761	Smarca1	0.595353	237.18	191.97	201.11	115.84	167.35	148.5	171.59	126.93	99.33	128.94	117.71	28.75	83.59	0	0	0.2	0.18	0	0	0.08	0	0	0	0	0	0	0	0	0	0
97165	Hmgb2	0.517857	17459.6	29295.9	36126.6	53826.3	45244.3	39603.4	34317.6	31630.8	28083.5	21304.4	18683	7514.55	8442.24	5137.02	3471.81	174.283	41.3133	38.8267	47.6933	37.3333	85.4667	36.06	310.087	49.26	116.36	24.5933	17.8767	7.09333	1.07333	0.873333
98999	Znfx1	0.728636	0	0	0	0	0	0	0	0	0	0	1.02	0.75	0.39	2.16	3.48	0	0.0166667	0	0.0133333	0.01	0	0.00666667	0	0.0166667	0.06	0.02	0.0866667	0.0433333	0.0433333	0.18

## Sheet: TF_TFRE_mRNA_cor
Gene.ID	GeneSymbol	Correlation	E12.5_TF	E13.5_TF	E14.5_TF	E15.5_TF	E16.5_TF	E17.5_TF	E18.5_TF	D1_TF	D3_TF	D5_TF	W1_TF	W2_TF	W3_TF	W6_TF	W8_TF	E12.5_R	E13.5_R	E14.5_R	E15.5_R	E16.5_R	E17.5_R	E18.5_R	D1_R	D3_R	D5_R	W1_R	W2_R	W3_R	W6_R	W8_R
11538	Adnp	0.490153	1.53	1.51	0	0	0	0	0	0	0	1.09	0	0	0	0	0	23.0034	15.5448	19.356	17.8157	13.499	13.8009	9.44344	10.3177	10.7361	11.8978	9.5333	10.9251	6.08391	3.68496	4.26987
226747	Ahctf1	-0.114388	373.17	99.42	40.32	10.22	7.78	7.78	8.94	10.85	87.92	51.73	61.19	161.58	243.58	231.43	94.7	17.0868	12.5881	16.9082	16.4436	9.5857	10.332	6.03881	11.1058	9.96072	7.68433	5.42082	8.56354	8.48838	2.52231	3.41319
93760	Arid1a	-0.103571	19.03	12.53	11.73	9.46	9.45	10.27	4.84	2.93	11	15.37	11.04	13.32	16.71	16.38	7.88	21.3442	21.0136	19.4767	16.2055	16.8623	12.1004	10.1531	12.4008	9.85488	9.19279	7.0838	6.14139	5.69269	3.90467	4.01347
239985	Arid1b	-0.711404	0	0	0	0	0	0	0	0	1.54	3.26	2.1	6.26	6.54	6.34	2.87	2.98954	2.5764	2.78125	2.45047	2.82531	1.71886	2.1568	1.18281	2.09631	2.14444	0	0	0	1.54505	0
77044	Arid2	-0.359571	6.01	6.79	2.03	0	0.62	0	0.46	0.69	5.12	5.78	3.94	5.3	8.04	6.98	2.47	6.71561	4.85077	6.70335	6.02214	3.61815	4.84999	2.77269	3.99673	3.19979	2.34379	1.78074	2.12697	1.59886	0	0
13496	Arid3a	0.954169	16.44	6.88	4.98	7.66	7.26	6.81	4.53	4.83	2.42	3.39	0	0	0	0	0	9.89825	10.9472	9.45266	9.86912	11.6927	9.85882	9.12075	8.27201	5.69115	3.72877	2.24354	0	0	0	0
238247	Arid4a	0.309571	8.63	0	0	0	0	0	0	0	0	0	0	0	0	0	0	6.82278	2.6242	7.15419	6.96283	2.54278	6.02245	4.80593	4.84282	4.57397	4.42862	3.98828	4.07491	3.07816	0	0
11863	Arnt	0.666671	16.13	19.19	34.51	59.66	72.08	63.12	35.54	0	5.18	14.4	11.51	0	1.17	0.65	0	12.3202	10.4808	11.0457	9.48097	9.15252	9.17703	7.75494	7.25225	7.62681	8.54213	5.72507	8.30842	6.5479	4.22107	4.66343
11908	Atf1	-0.433013	0	0	0	0	0	0	0	0	0	0	0	0	0	33.48	0	36.0804	26.6668	36.781	33.3445	21.9624	20.1084	15.0813	18.1441	17.0681	13.5025	10.1303	9.94672	10.2754	6.13029	7.27924
223922	Atf7	0.365286	36.19	11.48	17.96	8.99	6.47	18.76	7.35	3.37	0	0	0	0	7.28	43.98	3.53	2.51989	2.84831	2.70308	2.22045	2.39841	2.23562	2.27899	1.2663	1.65389	2.35866	0	1.21525	1.27567	0	0
116848	Baz2a	-0.703571	5.8	6.16	4.64	6.78	6.64	10.81	16.94	12.36	10.8	21.71	22.59	6.61	38.99	55.4	6.81	11.2402	10.6886	11.2542	11.0752	10.8112	9.73345	7.77827	7.65151	6.83642	5.37213	5.04442	4.77227	3.86034	2.5287	3.46226
14025	Bcl11a	0.72243	12.33	8.74	9.03	0	0	0	0	0	0	0	0	0	0	0	0	21.2091	17.4929	20.2734	14.474	9.49065	2.76637	4.67838	4.1371	2.59318	0	0	0	0	0	0
72567	Bclaf1	-0.171518	41.54	4.55	7.99	0	1.9	0	0	2.18	0	0	0	7.35	9.14	12.1	17.42	23.4928	7.47131	18.4501	17.1664	6.04864	12.2249	9.6674	9.93247	8.34906	8.42174	7.34018	9.04841	6.66423	1.42918	4.63883
12400	Cbfb	0.304306	0	37.24	83.59	102.14	87.4	85.97	112.14	65.72	30.67	0	92.51	0	0	0	0	12.2496	8.59473	7.57786	8.71393	6.69477	8.1439	7.03283	9.35213	7.8444	7.49081	6.45893	4.34566	5.50578	3.99861	3.8751
71702	Cdc5l	-0.760714	13.73	3.82	13.63	0	15.48	11.01	16.73	34.57	19.34	33.29	9.21	279.96	181.82	91.04	184.93	22.3425	17.0096	22.3541	19.715	12.5386	13.8877	10.6301	9.92127	9.86024	8.58598	8.04352	6.18526	5.06946	2.52969	3.51988
110794	Cebpe	0.187141	0	0	0	16.51	0	0	0	0	0	23.28	0	0	0	0	0	1.62825	3.27976	4.35731	6.20131	15.8646	15.1283	14.007	15.0866	6.2892	6.6064	3.81984	0	1.60611	4.79843	4.0488
12607	Cebpz	0.125	4.65	3.18	8.33	1.65	5.91	5.11	6.05	3.89	2.01	0.96	27.41	0	0.46	3.69	1.83	18.188	8.96879	13.6576	13.0861	5.32768	8.61001	7.31923	9.63924	5.99348	4.99568	4.81935	6.10017	6.22709	3.92503	7.21016
12912	Creb1	-0.254815	451	106.35	57.66	0	0	0	0	0	35.49	76.88	39.5	127.64	43.78	162.9	113.77	5.52829	2.43859	4.58393	4.36885	2.26172	3.34328	2.23267	1.90865	2.21237	1.90912	1.71746	1.42633	1.15899	0	0
229663	Csde1	-0.140408	0	0	2.8	0	0	0	0	0	0	0	0	0	0	2.6	0.86	59.2123	24.0762	49.0117	45.9261	22.1273	35.1727	29.2019	31.3755	33.3479	33.4723	34.0372	33.3851	32.7912	14.441	27.9768
13018	Ctcf	-0.221429	181.72	172.89	135.98	45.2	130.97	95.73	59.88	59.84	84.4	132.92	26.72	130.95	242.41	174.05	239.51	30.0943	21.968	27.191	27.9994	20.7455	15.0031	13.4353	10.3567	14.9994	9.92111	7.50213	6.07645	4.01035	4.7001	3.4229
13047	Cux1	0.119171	36.4	1	0	0	0	0	0	0	0	0	0	0.58	0.55	0	0	11.6897	10.7999	9.09956	8.03796	7.46265	4.69572	6.72265	5.62708	3.67215	5.07503	3.20361	2.29169	3.1105	6.40854	4.69169
13418	Dnajc1	0.185577	0	0	0	0	0	0	0	0	0	0	0	0	0	0	20.33	3.68165	3.18091	3.25139	4.91594	3.06163	4.27561	4.11869	3.3753	5.07843	3.87537	4.81035	5.03145	4.16254	4.32094	4.40402
22791	Dnajc2	0.605739	4.51	6.59	15.79	7.16	12.15	8.74	3.46	4.38	8.81	6.02	0	0.85	1.04	0	0	30.9813	11.8308	23.9115	19.7165	6.64841	12.3116	11.0404	11.6275	8.44349	7.29125	8.20105	5.15911	6.29882	3.14125	5.45964
104394	E2f4	0.896429	116.12	263.81	312.28	281.22	194.92	145.72	77.59	45.08	69.46	70.42	79.88	42.33	31.75	48.64	27.65	180.003	217.228	187.5	167.218	155.805	98.7996	58.8104	48.4344	54.2918	26.8205	23.9962	9.37009	10.6632	11.4807	10.4227
69257	Elf2	-0.142857	67.21	51.25	88.58	57.91	71.91	55.72	57.9	66.72	52.28	48.34	78.74	78.9	97.17	88.16	24.59	21.1943	19.3112	18.603	19.949	16.097	12.4055	12.2927	10.383	9.2369	10.9475	9.78496	7.22743	4.96603	2.51315	4.96253
238317	Elmsan1	-0.278534	13.72	4.91	0	0	0	0	0	0	0	0	0	4.47	7.56	2.41	0	6.72635	8.31859	8.57667	9.33433	11.8001	8.58013	5.06229	4.80256	3.98769	3.5852	3.2256	2.244	2.19341	1.22049	1.6415
14011	Etv6	0.591608	81.96	2.01	0	0	0	0	0	0	0	0	0	0	0	0	0	4.31137	3.69683	3.55416	2.90199	2.64837	2.04839	2.65803	2.99671	2.72339	2.28071	2.12445	1.43802	1.30312	3.11176	3.42789
17425	Foxk1	-0.671429	25.09	59.72	32.96	33.32	63.27	71.66	63.48	65.88	66.64	108.34	131.42	121.85	167.29	118.85	97.03	4.53817	4.6154	3.9584	3.74765	4.12387	2.87442	3.16119	2.98974	3.21529	3.80646	2.14985	4.11977	1.76903	1.81159	1.84395
56484	Foxo3	0.88092	2.46	32.54	33.81	54.69	68.51	39.99	24.11	8.69	0	0	0	0	0	0	0	31.6074	33.4773	37.5378	34.6181	38.7214	27.4375	16.6726	8.97184	11.7683	6.48159	5.03002	3.92835	4.97882	4.39515	3.76432
108655	Foxp1	-0.362824	41.83	45.47	35.24	13.49	49.83	51.52	45.2	36.29	36.44	43.41	68.2	77.81	86.42	129.51	62.38	1.82301	1.47184	3.13126	2.78811	2.94052	2.2144	0	2.67814	0	4.34353	2.76092	1.00418	1.0296	1.66398	1.38327
74123	Foxp4	-0.498211	3.96	4.42	3.99	3.32	4.71	0	1.6	0	2.87	0	32.65	10.67	11.43	23.66	15.14	22.2371	25.3739	16.1433	17.6375	21.2405	16.1351	18.9293	24.32	19.0961	18.4776	16.8405	13.5368	8.32797	11.3807	8.05836
14390	Gabpa	0.114286	470.37	426.07	341.37	152.24	286.16	237.55	203.31	236.09	123.72	174.52	398.92	211.21	278.72	311.46	166.35	9.74833	4.74723	8.81294	7.32014	5.15522	5.23094	4.56223	5.1388	5.63362	4.69727	4.71013	5.64489	4.64283	2.44524	3.56716
14391	Gabpb1	0.107143	160.2	160.29	137.82	116.32	282.68	261.41	399.41	332.69	235.92	224.7	216.87	90.88	116.1	234.25	113.83	8.71913	9.13729	8.71329	9.30467	7.64978	6.23929	3.79637	4.71736	5.97507	2.7887	2.45612	2.06326	1.57476	1.67818	3.43052
213054	Gabpb2	0.146429	145.94	199.88	265.84	206.77	363.74	232.97	288.7	246.51	278.33	236.07	336.36	212.5	203.29	155.22	154.38	12.0013	9.08778	14.011	12.6872	7.7431	7.41448	6.04998	6.09859	6.73962	5.21429	4.41896	2.12121	3.39385	1.23148	2.25174
229542	Gatad2b	-0.240173	19.36	5.18	0	0	0	0	0	0	0	0	3.93	9.49	10.71	11.96	1.27	5.76197	5.14109	4.95092	4.65266	4.99217	3.07349	2.21491	2.56014	2.56648	2.39544	2.51485	1.49763	0	1.10431	1.40796
14582	Gfi1b	0.733747	56.06	23.53	30.68	0	105.42	60.54	0	0	0	0	0	0	0	0	0	64.4593	83.8821	59.2325	49.1795	54.1471	32.4297	21.8825	25.041	16.1167	7.20669	5.24316	0	0	0	0
56809	Gmeb1	0.319951	0	5.81	0	0	0	3.43	0	0	0	0	0	0	0	0	0	6.7518	5.88645	6.179	6.87826	3.97823	4.14913	2.34512	1.6492	2.23982	2.4419	2.02414	1.65276	0	1.1825	2.04088
229004	Gmeb2	0.309295	0	4.35	0	0	0	0	0	0	0	0	0	0	0	0	0	8.74531	8.91078	9.30225	8.93104	8.44896	7.34716	4.97877	5.67849	4.86794	3.98919	4.81065	3.01303	3.21181	2.28183	2.87552
14886	Gtf2i	0.746429	176.96	92.9	73.08	25.17	74.3	50.92	44.6	43.41	56	56.84	37.06	37.27	67.61	31.99	5.39	40.245	41.8981	32.5379	31.501	36.0571	25.8687	29.6975	24.0152	28.5587	36.3937	21.8681	28.9251	28.2916	24.5559	17.6174
58180	Hic2	0.310405	36.66	0	0	0	0	0	0	0	0	0	0	0	0	0	0	4.02503	4.92405	3.30663	4.35137	3.70679	2.5113	1.58671	2.19656	1.15631	1.62658	1.29727	1.01506	0	0	0
219150	Hmbox1	-0.2416	25.83	7.35	0	0	0	0	0	0	11.64	25.29	17.82	33.73	49.23	39.47	6.84	3.30506	5.06234	3.75963	3.56099	2.48596	2.44718	4.25093	2.13715	4.0882	2.96488	4.03826	1.98019	2.58528	1.2049	3.79779
66867	Hmg20a	-0.307417	82.64	82.46	8.78	0	32.67	0	6.85	6.55	114.52	162.6	208.2	193.01	211.18	50.31	25.9	10.433	8.30429	8.17014	7.47646	6.49962	6.03976	5.11476	5.69133	5.37941	4.93435	4.4559	5.88501	3.64347	2.3598	3.14226
15364	Hmga2	0.551989	11696	3246.37	2563.35	1568.16	920.36	1407.75	3074.69	3119.55	1091.84	1177.14	1786.99	514.79	558.95	461.14	236.39	18.0172	8.15966	5.96052	3.07045	1.5415	1.02086	0	0	0	0	0	0	0	0	0
97165	Hmgb2	0.785714	17459.6	29295.9	36126.6	53826.3	45244.3	39603.4	34317.6	31630.8	28083.5	21304.4	18683	7514.55	8442.24	5137.02	3471.81	180.622	127.728	207.037	185.806	102.179	125.85	80.5799	86.2213	69.5464	40.646	39.8498	14.8495	8.42582	1.16176	1.38066
15354	Hmgb3	0.928571	10885.2	12021.9	15019.2	14017.5	12810.7	13621.5	7708.64	5838.65	4855.33	2527.16	3171.34	1659.54	2107.18	1483.74	1322.92	139.7	104.075	142.029	100.865	61.1201	51.0855	35.3051	32.5183	28.3156	17.5599	13.9977	10.8794	7.78624	3.76491	4.09736
15378	Hnf4a	0.557143	301.28	330.18	308.01	211.62	485.11	348.48	272.05	305.68	288.1	281.37	1327.78	2082.54	2212.7	3202.86	2712.97	22.1583	27.303	26.3107	32.0033	38.2502	37.054	49.8873	67.6896	48.7629	58.5895	54.2902	62.9822	100.363	77.8446	102.303
22778	Ikzf1	0.568733	43.6	22.79	13.65	0	7.65	0	0	4.19	12.29	8.23	0	0	0	0	0	14.1188	14.9946	17.773	18.3443	12.4413	5.92972	9.72698	11.4873	5.43485	5.22849	1.3296	0	0	0	0
54131	Irf3	0.332143	29.98	46.55	43.22	33.92	63.42	94	135.28	55.8	79.98	117.47	61.88	222.4	179.38	349.3	507.56	27.0674	31.5087	23.7991	22.9105	26.1934	26.1715	26.3467	26.5887	24.3131	24.7838	24.0755	25.7468	29.5853	40.1811	26.8631
16549	Khsrp	-0.663087	0	16.68	11.49	0	4.66	26.02	0	3.15	5.18	9.82	22.7	39.19	28.57	61.72	50.08	66.5983	75.2346	59.0611	52.4474	51.5879	37.1107	27.446	26.1333	24.1941	20.0143	20.3096	14.5134	12.236	11.3929	10.2468
50794	Klf13	0.417857	44.16	72.01	42.29	0	40.12	19.01	30.55	62.45	37.04	34.46	31.66	33.86	53.71	25.34	3.83	8.46646	10.3655	9.03318	9.86243	13.1419	10.7264	9.82659	12.2424	7.45341	5.80843	4.43284	5.0126	11.5459	5.52058	5.71796
16978	Lrrfip1	-0.0800132	0	0	0	0	0.75	1.74	2.02	0	1.25	1.65	1.56	5.31	5.19	4.52	6.22	6.17489	3.18124	5.7387	6.77764	5.415	6.18251	9.02284	10.6181	7.11623	7.56755	7.73639	6.64306	6.42869	2.87502	5.08795
71268	Lrrfip2	-0.171429	10.88	164.69	165.67	2.28	197.98	293.82	101.02	161.73	53.63	502.41	27.07	613.17	562.49	331.59	1283.86	10.7889	8.63923	9.60661	9.12509	6.5051	7.62422	6.76012	9.30528	7.72639	7.61096	7.80355	9.09675	9.44464	5.83552	8.78503
17002	Ltf	0.940755	0	0	0	3.26	31.31	63.47	174.88	47.3	15.67	45.21	18.48	0	0	0	0	7.51344	8.47469	11.2491	30.3673	97.0785	139.429	124.274	115.047	66.5482	76.9845	45.886	1.96658	0	0	0
17089	Lyar	-0.35	35.47	33.21	35.36	38.84	130.76	70.32	164.98	122.57	145.94	176.55	5.83	94.49	75.14	67.84	94.32	75.8341	53.6379	66.3585	46.7279	22.0366	20.2141	20.5142	22.4423	14.1253	11.6581	13.4826	7.71888	12.5266	4.46454	7.22709
17134	Mafg	-0.635714	215.51	91.58	107.39	95.52	107.49	93.23	203.87	166.38	220.37	294.25	169.3	424.31	444.35	344.33	325.71	60.004	48.6373	41.4458	40.6383	46.3863	43.849	27.063	20.249	24.638	19.1235	25.4698	21.1814	26.1013	13.9257	24.5318
17187	Max	0.403571	1161.3	1163.02	770.38	457.14	751.61	719.58	743.36	565.89	780.09	905.98	900.55	717.22	720.72	539.01	598.37	38.7413	36.4735	33.7332	32.6707	24.0647	26.337	21.7211	22.1763	17.355	14.2741	13.4004	13.0376	7.58673	7.38766	7.13618
17188	Maz	0.271429	171.06	154.98	72.83	29.94	134.38	84.85	40.33	52.1	73.89	68.45	86.86	83.72	86.48	89.46	39.02	197.296	258.776	181.599	164.635	159.789	113.096	77.4121	77.3942	67.0138	50.8366	51.8112	33.4243	37.4789	34.8924	24.8382
17190	Mbd1	-0.0756787	22.13	10.14	15.71	0	0	0	3.76	0	10.85	21.6	6.28	56.16	50.65	51.31	22.02	14.9446	13.3426	13.4921	12.6127	11.4187	7.8932	7.2816	7.57733	7.32013	6.79253	5.44559	5.62888	6.01414	9.10004	14.8081
17191	Mbd2	-0.110813	14.42	8.48	10.42	28.06	25.75	23.9	23.07	14.42	9.59	9.9	27.47	16.15	24.37	50.41	15.79	50.9013	50.5173	54.164	54.9914	50.2943	52.7634	32.9011	32.6473	29.9823	20.7518	22.639	19.4082	18.6927	19.4733	20.9426
17192	Mbd3	0.116844	80.16	48.17	0	0	0	0	0	0	0	0	1.97	4.05	5.99	2.65	0	110.458	136.362	92.4879	81.423	85.6052	56.3297	50.4231	55.5359	51.7667	41.9538	54.1801	39.5788	41.4741	54.9582	40.146
17257	Mecp2	-0.860714	338.1	178.52	162.17	133.58	167.21	231.68	403.8	592.45	783.96	1105.75	997.41	1833.15	2190.13	2316.82	1866.83	4.74341	4.82185	4.55491	4.39734	4.19771	2.80598	2.66388	2.89567	2.31067	1.95582	1.42139	1.72559	1.68993	1.62405	0
17261	Mef2d	-0.596429	12.01	28.32	13.79	0	31.44	36	36.45	35.78	29.61	33.93	21.8	33.83	43.24	37.43	58.89	18.7321	19.6992	16.1982	12.8736	12.6311	13.5252	10.8722	12.9236	9.90148	10.5884	8.1302	9.14532	6.53329	5.10166	6.20057
17268	Meis1	0.425623	53.77	22.81	6.34	0	4.38	3.69	0	0	0	0	0	0	0	0	0	5.08547	2.73468	3.46621	2.73383	2.64153	1.85788	2.40134	2.45823	1.839	2.65944	3.28817	3.27477	2.94846	0	0
21428	Mlx	-0.0714286	52.07	114.6	122.51	123.48	176.95	237.31	228.26	213.57	381.83	520.8	392.35	1409.94	1442.33	1716.11	2701.87	15.6412	16.7974	13.1486	13.0515	12.3179	11.0909	10.0617	10.9554	11.2911	7.94147	11.3842	6.23408	13.0604	17.9744	17.0864
58805	Mlxipl	0.921429	10.44	21.05	19.31	20.01	27.72	33.47	31.01	28.76	60.62	86	105.7	313.38	285.13	516.75	557.27	8.06218	5.94378	8.7368	9.3685	7.80666	10.6014	13.2641	20.08	21.8514	27.7112	32.8159	42.6376	40.848	39.2982	59.7102
116870	Mta1	-0.0109109	11.57	3.81	1.97	1.23	0	0	5	0	0	2.72	0	4.01	5.31	9.52	1.13	41.1111	43.1983	32.1849	27.1376	27.171	18.7202	16.7406	19.827	15.7597	16.7477	15.9071	18.4352	12.2009	10.4627	9.5518
23942	Mta2	-0.635714	28.3	16.89	11.58	13.61	12.69	17.37	20.51	10.49	17.95	21.03	26.14	27.57	41.64	41.71	26.4	69.7199	81.1414	61.4234	58.5121	52.1553	38.0341	30.9892	32.021	29.334	24.2478	21.2157	18.4601	14.9521	16.5267	12.8676
116871	Mta3	-0.442253	7.42	2.84	0	0	0	0	0	0	0	0	8.93	5.7	7.41	0	0	10.835	5.45255	13.1769	7.73829	7.55233	11.0996	10.7612	8.4734	9.76496	7.655	2.99647	5.08104	5.00736	5.70894	4.38763
17876	Myef2	-0.634432	87.56	7.42	0	0	0	0	0	0	18.38	7.23	9.03	220.86	295.91	343.15	217.4	23.0941	8.12248	16.2758	15.6439	6.19749	9.54809	5.8063	5.00044	5.57673	4.66107	5.3416	4.16643	2.42072	0	2.20612
20185	Ncor1	-0.54935	0	0	0	0	0	0	0	0	0	0	0	0	0	1.63	0.76	19.7368	11.4595	17.5809	15.6286	12.3222	14.6026	11.6122	12.5328	8.4236	10.8243	9.34912	10.2238	9.65707	7.88919	8.83641
20602	Ncor2	0.0181104	0	0	0	0	0	0	0	0	0	0	0	0	0.47	14.19	0	7.52107	8.85346	5.30588	5.57045	6.63643	4.81962	6.91972	4.69494	7.10421	8.17932	7.83439	7.25108	5.78062	7.36116	5.79462
18027	Nfia	0.897334	249.81	128.46	110.08	153.1	273.78	465.18	563.42	955.23	1110.71	1372.56	2321.73	4224.91	4073.58	4317.82	4929.76	0	0	0	1.10801	0	1.09936	2.39596	2.49031	2.32192	3.1915	2.72508	3.18404	4.58796	2.98188	4.37084
18028	Nfib	0.839286	346	184.55	185.25	201.93	380.41	543.27	702.39	1163.75	1262.93	1680.18	3063.49	3853.4	3647.18	3756.44	4132.27	3.23144	1.61447	1.85621	2.85527	2.00199	3.99477	4.55229	5.95165	5.84351	8.49303	8.75882	12.0709	10.0576	4.7785	5.24868
18029	Nfic	0.814286	197.27	137.8	97.15	104.14	197.94	301.95	349.83	606.66	906.37	1038.23	2649.19	4214.28	4026.54	4204.97	5166.29	5.11347	5.70365	3.98865	4.58126	5.03694	4.87627	4.51631	12.0222	10.3922	16.8343	15.9183	15.5597	17.7334	29.9851	14.0219
18032	Nfix	0.682143	123.47	95.42	84.81	98.29	184.86	278.85	306.78	534.62	627.32	686.62	2123.03	3416.04	3169.17	3595.81	3433.7	3.64346	8.6364	7.2327	7.20616	4.25084	3.8881	2.83784	10.3973	10.8522	11.3997	10.7712	17.1844	19.0254	31.1565	8.24863
18033	Nfkb1	-0.488734	2.18	2.39	4.76	6.04	4.75	7.68	0	0	0	0	9.47	0	0	8.19	17.3	10.3487	11.0612	9.63341	9.08634	9.28205	8.60559	9.93091	11.3458	9.67239	10.1076	9.52688	7.39489	6.3664	6.12652	5.4946
18034	Nfkb2	0.185577	0	0	0	0	0	0	0	0	0	0	0	0	0	1.5	0	5.73193	7.30538	4.78485	4.68903	5.42876	4.77443	4.43723	3.8646	4.23364	3.97067	4.07222	4.22508	2.91926	5.07534	7.42154
18044	Nfya	0.282143	2924.26	2227.95	2459.54	676.51	1226.94	638.77	486.09	847.79	1773.01	1553.84	2297.28	1030.1	990.36	1041.83	648.32	24.833	16.1507	21.5174	19.9142	15.5094	17.2844	11.1987	8.27246	11.6347	8.24727	5.57503	1.91532	1.65104	0	2.1007
18046	Nfyc	0.371429	7585.44	6921.3	5834.06	1302.81	3568.48	1629.11	1813.05	3090.38	6763.1	6042.42	4622.3	3857.55	3429.11	3107.71	2562.51	23.2327	27.8601	26.8762	21.7672	20.303	14.6984	11.6348	13.055	13.7992	11.8502	12.4852	11.2688	9.27933	7.26755	8.65488
11819	Nr2f2	0.160714	395.1	179.42	137.16	55.6	89.76	96.83	34.41	66.72	66.84	81.86	211.7	241.11	302.73	327.71	180.91	12.058	8.25836	6.83486	6.5688	5.1876	6.11539	5.43568	7.52899	9.07876	10.9768	10.8724	9.34533	6.57179	4.12298	4.0996
14815	Nr3c1	0.0396412	0	0.93	2.6	0	0	2.72	1.27	0.61	0	3.86	3.16	31.25	35.28	36.03	25.08	5.55571	4.30481	6.55512	7.70573	5.91355	9.19762	6.87564	6.50655	7.36601	8.66934	7.32172	8.95321	7.29867	3.76008	5.23758
18181	Nrf1	0.317857	262.06	648.66	884.36	851.39	1507.45	1086.7	1182.7	1024.95	691.57	785.53	867.37	401.89	389.39	424.04	352.23	24.1645	21.5404	22.9075	22.8858	14.67	15.4994	10.7362	6.51701	10.2612	6.59675	4.95644	3.42633	1.56201	3.12206	2.1614
56218	Patz1	0.32593	47.37	31.54	13.13	0	9.11	11.64	0	0	0	0	0	21.76	15.21	11.11	0	19.2866	22.1582	15.315	12.9086	12.1898	8.80279	7.5582	7.70282	4.98011	5.68174	4.58613	2.56447	2.31147	0	0
67367	Paxbp1	0.123718	0	0	0	0	0	0	0	0	0	0	0	1.78	0	0	0	13.2968	5.25741	11.2476	11.9279	5.20224	9.79586	7.78117	8.38832	7.68863	6.81568	6.76712	7.90589	3.5913	1.31544	4.7532
66923	Pbrm1	-0.55	18.4	24.6	12.2	6.31	14.41	11.42	11.11	6.64	29.88	28.2	26.08	31.65	43.99	32.96	13.96	11.2325	5.90106	12.1344	12.6994	5.86413	7.17255	3.9793	4.7006	5.71256	4.16518	2.59963	3.27406	2.85035	1.11116	1.43402
18515	Pbx2	0.371429	82.05	50.03	23.62	2.34	10.76	7.22	6.99	2.02	3.28	2.55	18.44	8.68	12.13	16.03	2.05	27.9394	32.8267	23.6514	23.1159	24.7486	20.0647	16.7971	20.5236	12.7968	10.9254	12.3641	11.7425	6.10143	5.71836	5.52963
18673	Phb	-0.253571	31.61	40.08	112.24	102.59	58.56	100.53	133.47	53.88	132.12	285.75	138.22	250.9	273.05	173.78	202.45	60.2945	122.892	106.209	96.6577	101.907	102.161	96.3147	142.551	80.9479	74.2058	101.358	89.4404	111.138	103.697	67.5205
56469	Pias1	-0.418651	4	3.2	4.7	0	0	0	0	0	6.56	15.3	8.66	0	4.81	13.98	4.6	6.61101	4.70163	7.06653	7.18898	4.96441	6.19456	4.91706	5.43497	5.69837	4.85764	4.30156	4.43144	3.05995	2.08466	2.29719
59004	Pias4	0.0414108	59.94	37.8	0	0	0	3.08	2.63	0	0	0	0	4.29	4.97	22.33	1.27	22.8748	26.4441	19.6379	19.8231	19.2743	18.4768	13.5752	10.8916	11.8835	9.87132	8.94275	9.12833	6.94766	8.3089	4.82801
18986	Pou2f1	0.0670955	5.21	21.94	69.89	34.91	83.78	16.39	23.87	0	0	0	0	0	0	0	0	2.85208	0	0	0	0	0	0	0	0	0	0	0	0	0	0
50907	Preb	-0.409294	0	0	5.84	17.77	34.82	111.22	61.46	12.36	10.77	33.67	86.43	25.45	17.75	23.49	44.39	23.2355	32.8393	33.8759	20.1514	25.7223	25.1895	21.7245	35.0118	29.7982	21.1438	18.0751	23.7333	41.3606	21.475	33.3293
19130	Prox1	0.214286	4.12	17.14	21.82	51.37	53.55	55.46	52.79	29.5	14.86	36.72	73.01	101.89	97.71	118.38	53.98	4.49	3.19149	6.19985	6.6782	4.06827	4.83642	6.92101	7.47783	9.45736	13.4377	11.3026	12.5657	6.88926	5.96336	13.2256
19290	Pura	0.803571	7.7	25.95	43.93	10.87	92.39	45.92	88.49	156.07	215.67	532.63	426.15	1030.24	867.32	1366.97	975.1	1.38336	1.05066	1.23658	1.21039	1.15369	1.63825	1.71712	1.906	1.87689	1.91675	2.10007	2.91343	2.45194	1.81862	2.34332
19291	Purb	-0.935714	86.17	107.56	96.76	48.61	256.96	171.35	212.46	373.97	305.98	450.39	366.62	619.14	616.91	844.38	671.14	10.8772	7.40069	11.1267	11.2092	5.79479	8.08687	5.91665	6.10644	5.94171	5.12494	5.07432	4.39735	4.05909	2.08096	2.66424
19664	Rbpj	-0.0178571	250.06	335.6	238.63	228.5	346.95	418.24	321.58	250.02	198.58	221.69	229.58	267.31	270.48	235.13	267.46	5.22802	4.85966	4.34096	3.94559	2.79313	2.30051	3.11555	2.44089	2.6063	3.09473	1.76422	2.27306	1.59245	1.16863	0
217864	Rcor1	-0.610714	154.28	116.04	53.52	11.27	49.33	58.78	34.26	38.45	68.05	140.55	409.87	235.88	306.02	278.07	239.55	13.3192	10.523	12.9864	11.0672	8.40399	5.83463	4.2833	4.93674	4.90616	4.51675	3.5624	2.53732	2.39026	2.98877	3.04296
214742	Rcor3	-0.708203	0	0	0	0	9.05	0	0	5.14	19.68	37.42	26.57	55.35	59.53	48.21	35.41	2.93586	2.33989	3.28529	3.14403	2.37299	2.6754	2.33915	2.6721	2.33481	2.76202	1.99248	2.05927	1.43756	0	1.05914
68750	Rreb1	-0.678571	42.38	22.3	9.22	8.26	10.57	19.73	15.16	11.51	15.88	32.66	52.7	75.04	74.05	73.93	86.36	7.15604	5.47581	6.44848	5.96518	6.65259	3.60428	5.59506	2.61659	3.92341	5.87338	1.21813	1.47405	1.16723	3.06365	0
20181	Rxra	0.939286	78.12	65.68	67.14	31.48	84.86	105.71	81.98	106.89	133.5	202.85	478.98	783.75	954.7	1389.99	989.21	11.9305	19.3287	14.9436	16.4134	24.443	22.5082	36.9709	41.672	40.317	60.6625	42.6031	44.1714	73.941	104.788	80.874
17127	Smad3	-0.44816	1.29	0	1.53	0	0	0	1.97	0	3.51	2.1	0	2.96	3.73	1.63	3.08	4.5974	5.1044	4.15127	4.0248	3.37286	2.94338	2.35364	2.6532	2.2996	3.48728	2.00044	2.95147	1.69627	1.72299	2.19124
17129	Smad5	-0.061859	0	0	0	0	0	0	5.17	0	0	0	0	0	0	0	0	4.62747	4.07003	4.41689	3.62491	3.85654	3.83908	3.90866	5.1864	5.49225	6.17367	4.88075	4.80634	3.78719	2.47894	2.43538
93761	Smarca1	0.426712	237.18	191.97	201.11	115.84	167.35	148.5	171.59	126.93	99.33	128.94	117.71	28.75	83.59	0	0	2.11323	0	1.17567	1.53016	0	0	0	0	0	0	0	0	0	0	0
54380	Smarcal1	0.139286	7.65	41.74	68.79	55.53	113.85	85.77	56.4	49.8	33.51	10.05	24.27	49.22	7.54	39.58	60.57	7.92183	7.68955	7.44089	5.61183	6.29404	4.63823	4.0336	3.72311	4.06807	4.52277	3.78868	2.50218	3.50494	3.56083	3.42167
20588	Smarcc1	-0.157143	41.01	34.92	23.95	10.37	10.88	16.43	10.83	8.81	17.46	35.23	30.94	29.48	37.95	40.08	21.53	25.8697	24.5081	21.164	17.0714	14.9519	9.1402	8.19077	7.79257	7.42657	7.61558	6.49867	4.02088	3.48544	3.3192	1.97678
68094	Smarcc2	-0.325	26.69	30.69	18.34	2.05	8.26	5.83	11.59	14.9	49.63	97.93	45.17	155.68	152.69	132.1	86.66	24.9787	26.5557	23.8876	22.3948	22.6167	14.9087	16.1026	16.8748	18.6966	19.0474	19.0868	16.6882	13.9056	16.0312	15.4815
57376	Smarce1	-0.717857	44.14	31.6	23.2	3.55	16.32	10.99	6.74	14.28	49.38	62.03	66.61	59.42	95.03	96.32	55.38	38.0425	23.7108	34.0243	28.792	16.8693	18.585	15.1254	18.1283	14.6222	13.4858	13.0481	9.39046	10.3634	6.55658	7.85469
20658	Son	-0.075	21.18	45.58	119.62	30.21	98.59	54.43	32.22	51.26	51.73	112.57	96.7	65.7	35.34	36.88	47.75	33.1543	27.6343	30.4966	28.48	22.4027	25.7754	20.1257	21.1963	19.9121	16.3908	17.9592	15.5108	14.8796	9.83997	13.2517
20679	Sox6	0.208803	66.77	44.67	11.3	0	0	0	0	0	0	0	10.1	0	0	0	0	3.68716	0	1.57607	1.39566	1.06193	1.19847	2.26396	0	2.14934	0	0	0	0	0	0
20684	Sp100	0.124838	0	0	0	0	0	0	0	0	0	0	13.72	0	0	0	0	0	0	0	1.08449	1.01496	1.25104	4.73224	4.46635	5.0469	3.77316	2.43273	3.34233	2.06224	0	1.10845
20687	Sp3	0.3521	423.05	339.9	341.94	186.12	201.79	0	0	99.97	178.7	165.83	157.08	195.15	245.23	143.18	90.6	17.2956	9.22722	17.878	20.8109	10.938	13.5142	8.90898	8.93782	9.66267	8.16997	7.47214	7.88744	3.86186	1.5244	4.39234
20833	Ssrp1	0.653571	80.65	52.06	89.78	44.04	101.36	18.75	82.39	83.48	20.43	62.95	37.82	27.2	3.08	14.97	0	135.411	131.77	128.636	103.127	78.5068	60.5148	39.7859	51.9389	48.5729	35.9082	29.6004	22.5182	25.975	14.2874	12.49
20846	Stat1	0.255288	0	0	0	0	0	0	0	0	2.03	0	0	0	0.43	0.77	0	3.73752	4.57285	5.8314	5.40219	4.03211	5.07896	14.0605	9.13911	13.0547	14.4078	15.0543	7.57765	6.25234	10.4232	8.7616
20847	Stat2	0.28373	0	0	0	0	0	0	0	0	0	0	0	1.05	1.5	0	0	4.59363	4.0075	5.25856	5.31907	4.89136	6.9385	14.454	14.317	11.447	11.9074	15.9397	12.064	15.0512	12.5419	20.8351
20848	Stat3	0.512812	0	0	0	0	0	34.66	26.45	31.16	33.35	53.9	3.74	56.08	15.39	20.52	75.56	13.5942	18.1491	14.2856	18.5497	21.079	17.8359	21.6703	22.5945	19.3548	19.8747	26.2371	22.811	18.2904	30.1866	44.7366
20851	Stat5b	-0.585571	0	0	0	0	0	0	0	0	0	0	0	0	0	8.44	1.55	15.2037	16.8284	13.6836	14.0162	15.5485	10.3982	10.922	10.9112	11.4318	13.5532	11.7036	18.1287	14.7434	9.82322	9.67301
20024	Sub1	-0.446429	2170.42	4071.29	2320.87	1319.36	5307.26	7526.94	7078.84	6774.37	11053.4	11970.2	4299.73	5858.31	5588.86	3916.86	5269.21	41.042	26.5339	36.0222	31.5501	20.3534	25.3419	20.4004	19.3643	19.2775	18.5003	20.2553	14.8876	19.4498	9.33569	11.6763
21349	Tal1	0.90257	170.32	184.4	95.16	39.59	71.66	64.22	30.36	0	37.8	15.56	0	0	0	0	0	131.19	117.649	137.406	118.324	102.511	70.5218	36.0351	17.0877	28.8001	10.0111	10.5145	0	0	0	0
21406	Tcf12	0.697051	16.32	17.87	8.19	6.5	8.22	6.03	10.4	7.78	3.93	7.25	0	0.92	2.14	0.97	0	10.2005	7.71214	11.1919	8.73222	6.0988	6.59022	5.86205	5.48112	6.70135	5.86829	4.43091	4.46117	3.30423	0	2.04199
21423	Tcf3	0.876509	95.68	47.88	27.75	13.83	33.61	30.08	15.96	24.59	14.28	0	14.35	0	0	0	0	78.7754	91.0868	68.877	64.063	61.8101	41.8775	35.1817	31.3975	27.8503	16.9853	17.6248	8.88114	6.44864	6.02575	5.51748
21750	Terf2	0.795704	12.95	9.84	11.47	7.87	3.93	1.29	6.64	6.09	4.77	4.51	0	1.42	4.61	0	0	15.143	12.7368	12.303	10.1475	10.2252	8.45089	6.97471	9.05539	6.68381	6.05288	5.86677	5.58746	3.77324	2.85684	2.82428
21780	Tfam	-0.317857	3848.79	2033.66	1215.98	1246.83	1885.69	2970.41	4712.62	7023.71	7475.37	11305.2	11158.2	22315.4	20383.6	22205.9	27915.5	15.9742	10.365	13.9763	11.4677	7.79642	9.14266	7.21985	9.62269	9.84746	10.5852	11.2254	11.8181	9.71786	5.34765	5.4158
224481	Tfb1m	-0.293418	0	0	0	0	0	0	4.8	0	0	0	17.45	6.48	9.06	1.97	0	10.2299	10.6477	9.97528	7.83554	7.00094	5.91924	5.02505	6.27672	6.16403	5.4423	7.25388	4.29045	6.67743	4.74554	4.36985
21781	Tfdp1	0.785617	60.27	49.83	58.92	29.89	35.79	37.89	21.48	14	0	0	32.04	0	3.67	4.07	0	94.7381	82.8123	86.0751	71.5615	53.4166	44.8358	32.0732	28.9492	34.8715	21.5923	19.4871	8.79664	9.67155	6.82908	8.49813
209446	Tfe3	-0.108812	33.06	6.05	0	0	0	0	0	0	8.49	13.03	23.69	16.3	21.61	40.1	21.67	8.36028	11.873	8.33443	6.45519	9.74851	7.73491	7.77765	11.0266	8.56363	8.57779	6.46206	8.33187	7.38458	8.73084	6.97166
77862	Thyn1	-0.174574	157.25	95.37	8.6	0	0	0	0	0	71.67	65.96	69.48	173.48	220.28	289.42	232.89	23.239	19.1016	18.626	14.9899	11.2138	10.7221	9.06717	9.01564	10.2895	7.31355	9.93858	7.77506	8.99529	9.34198	9.55987
268741	Tox4	-0.346724	20.01	19.21	0	0	0	0	0	0	13.42	11.03	1.03	15.76	35.73	9.74	11.26	12.537	10.9082	9.2996	10.5021	10.9792	6.62655	5.71221	7.43643	5.17701	5.14075	5.26596	4.36966	3.67741	5.00864	4.12234
22130	Ttf1	-0.459263	0.68	1.69	0	0	0	0	0	0	0	0	0	0	2.12	12.05	4.63	3.78126	2.41874	4.20982	3.09201	2.49004	2.24518	2.49143	2.59424	2.05667	2.12946	2.12807	1.44932	1.91834	1.26364	1.35901
22221	Ubp1	-0.436104	455.64	69.33	9.71	0	6.38	17.2	0	7.54	5.08	22.99	19.12	325.19	329.75	356.44	279.11	46.8898	38.0163	52.0647	48.298	35.1285	33.3674	22.5984	23.7281	19.7189	13.5164	13.5058	11.2542	10.8392	9.44134	9.21044
21429	Ubtf	0.825	2482.03	1871.22	2398.36	803.05	1163.81	805.95	949.32	1163.93	469.42	662.45	935.15	455.17	745.69	726.45	351.83	63.3313	70.1685	58.7005	54.3824	45.9274	32.4164	29.863	32.9871	28.2171	22.0118	18.7194	14.1572	12.3083	11.6859	10.0771
22278	Usf1	0.0428571	479.78	243.98	226.23	147	169.68	154.48	131.77	169.74	10.07	23.37	335.28	114.76	150.25	258.85	136.98	14.6897	22.3209	13.1341	12.8562	15.2548	15.4332	14.4363	17.7181	13.3725	16.6667	14.5926	16.0189	11.9352	10.7644	9.28754
22404	Wiz	0.186272	120.5	24.49	7.48	0	0	0	0	0	3.42	4.46	0	7.84	20.68	14.28	12.26	13.2458	9.15148	12.7125	12.7095	11.6033	6.17758	4.7461	3.98448	3.21973	3.46976	3.33112	5.05669	3.57498	4.04903	5.17951
22608	Ybx1	-0.264286	1906.84	1919.79	1045.8	531.06	773.92	537.98	786.69	1067.27	2345.33	2564.92	1831.25	2820.62	1592.69	905.59	1141.67	488.963	508.995	411.531	323.09	274.681	221.02	187.518	174.883	169.597	148.617	170.654	131.366	141.88	114.464	94.6113
56449	Ybx3	0.342857	576.59	935.94	858	362.04	524.53	518.41	481.17	547.05	961.32	904.75	930.57	802.59	475.25	303.47	307.82	388.863	457.129	403.811	350.883	323.551	242.115	148.368	104.156	90.0205	47.6261	56.2224	26.0996	35.5432	20.9689	15.933
64050	Yeats4	0.585571	5.77	6.83	0	0	0	0	0	0	0	0	0	0	0	0	0	46.7741	45.2432	42.7498	37.1739	34.2554	29.9383	21.9944	25.2872	20.2882	17.6379	17.6178	15.9976	14.9752	11.6252	13.2834
22632	Yy1	-0.371429	410.79	681.24	353.71	137.51	284.72	278.65	84.06	113.98	355.59	373.78	227.69	755.21	687.26	740.22	709.41	27.3379	25.1456	26.4019	23.0677	20.9836	18.3986	14.6644	14.7153	13.9744	13.5112	11.8252	13.5152	8.30302	10.0202	9.39947
56490	Zbtb20	0.676809	0	0	0	0	0	0	0	0	0	5.9	24.02	418.5	354.43	1029.59	718.63	0	0	0	0	0	0	0	0	0	1.20056	0	0	0	10.6476	7.69899
16969	Zbtb7a	0.551989	11.54	33.89	30.97	12.77	0	0	0	0	0	0	0	0	0	1.66	2.25	38.908	43.3138	42.0015	37.5952	34.1639	22.7164	15.7614	15.4235	14.3824	11.5901	11.2508	8.20557	6.91999	7.96583	8.21098
24136	Zeb2	0.0250898	17.88	6.21	4.31	0	4.95	4.46	1.01	1.67	3.19	9.81	11.17	8.7	4.62	3	2.21	5.98496	2.21302	3.37226	5.10514	2.76402	4.09801	4.48344	3.30386	4.99189	4.42354	3.51729	2.70089	0	0	0
22661	Zfp148	-0.407143	135.51	47.04	16.01	0	8.14	13.86	17.59	26.72	75.78	104.35	69.04	241.56	244.68	222.66	151.47	2.98019	1.55056	2.84947	2.81218	1.64878	2.29779	1.90551	2.12306	2.84124	2.4344	2.2006	1.8991	1.30006	0	1.39002
22680	Zfp207	0.0850487	11.03	10.01	0	0	0	0	0	0	0	0	0	6.29	17.83	6	0	32.3273	40.7023	28.5957	27.9336	27.0635	27.5713	26.66	33.8938	18.0224	16.8727	16.5197	13.0559	19.1948	10.1506	7.1594
208968	Zfp280c	0.208655	2.2	1.73	0	0	0	0	0	0	0	0	3.73	0	0	0	0	2.49145	1.12122	2.54201	2.08195	1.01612	0	1.22346	1.47869	1.50245	1.25671	1.32352	0	1.39125	0	0
54367	Zfp326	-0.327437	1.26	0	0	0	0	0	0	0	0	0	0	9.14	12.03	11.63	5.38	6.79981	2.77558	5.044	3.77632	1.98422	3.25647	2.38472	4.43576	3.90236	2.90737	4.52193	2.98634	2.88115	1.96541	1.4843
269639	Zfp512	-0.289286	60.15	39.69	32.76	13.3	19.09	26.41	28.86	78.01	20.84	21.64	39.56	87.83	104.83	117.28	38.39	9.38909	7.00207	8.23793	6.55986	5.55984	5.78399	4.99115	4.99639	4.3132	3.30426	4.112	4.42919	3.16943	1.73544	2.25315
233410	Zfp592	-0.705858	0	0	0	0	0	0	0	0	0	0	0	3.21	4.1	7.76	3.43	8.04784	7.91518	7.93396	7.43169	7.15689	6.02634	4.86908	5.51888	4.55429	4.3986	4.16002	3.83869	4.17049	4.07399	3.76161
78266	Zfp687	-0.119878	5.86	8	0	0	0	0	0	0	3.58	3.37	4.54	3.44	4.61	2.3	0.45	8.40358	10.1799	7.44788	7.37959	6.4	5.24401	3.92827	4.35962	3.66869	3.36166	3.30997	2.35422	2.77112	2.8859	2.49542
244216	Zfp771	-0.185577	0	0	4.82	0	0	0	0	0	0	0	0	0	0	0	0	26.0194	36.7666	17.3636	17.5978	19.3085	16.0096	17.3895	23.4017	15.6409	14.1952	15.4004	18.8083	21.2058	24.1082	18.5285
22761	Zfpm1	0.0363696	19.7	13.2	6.18	0	1.51	0	1.43	0	0	0	0.38	4.42	5.62	12.5	14.74	163.358	232.477	157.061	147.267	172.175	88.9463	58.0001	49.3836	59.6538	27.2618	32.6325	10.7694	9.91864	24.8733	22.808
320799	Zhx3	0.210042	0	0	0	0	0	0	0	0	0	0	0	11.52	23.62	54.43	19.42	1.08229	0	0	1.50428	1.33185	1.43529	0	3.43245	1.06768	3.70754	3.43886	0	8.69793	5.28404	0
98999	Znfx1	-0.650622	0	0	0	0	0	0	0	0	0	0	1.02	0.75	0.39	2.16	3.48	6.73032	6.53927	7.96492	6.54101	7.86988	6.26047	6.79744	6.76919	5.69204	5.24261	4.48536	3.79549	3.67977	6.31126	4.8824

## Sheet: Readme
A list of 149 TFs that were found in the RNA-Seq, TFRE, and MS experiments.
Sheet1: Spearman's correlation coefficients of 149 TFs measured by RNA-Seq and LC-MS/MS;
Sheet2: Spearman's correlation coefficients of 149 TFs measured by LC-MS/MS and TFRE technique;
Sheet3: Spearman's correlation coefficients of 149 TFs measured by RNA-Seq and TFRE technique.
