# Supplementary material for: A time-resolved multi-omic atlas of the developing mouse liver
Source: HighWire-hosted journal article supplement (doi:10.1101/gr.253328.119), 2020-02-01
Supplement: Supplemental_Table_S8.xlsx [file Supplemental_Table_S8.xlsx]

## Sheet: Sheet1
ID	Protein.names	Symbol	FDR	L020	L038	L025	L009	L014	L103	L012	L054	L008	L040	L053	L026	L063	L006	L023	L077	L036	L079	L019	L037	L076	L109	L064	L066	L051	L091	L058	L087	L108	L016	L044	L085	L107	L057	L039	L030	L088	L049	L065	L067	L097	L033	L099	L034	L043	L106
A0JNW5	UHRF1-binding protein 1-like	UHRF1BP1L	9.27e-05	312581	72057.1	39257.8	0	17125.5	80485.6	123136	25316.5	62759.2	345487	481538	126394	0	730980	0	100791	102688	94359.5	14513.9	374156	211597	39849.6	496704	113778	88707.3	423819	10908	71412.1	86774.4	86690.5	176808	269231	17217.5	121267	655508	82038.6	489410	299873	723824	226115	164092	504922	231062	292335	279962	354776
A1X283	SH3 and PX domain-containing protein 2B	SH3PXD2B	3.64e-07	0	204381	0	73805.6	0	272167	64334.1	50468	0	0	513710	103174	0	48915.4	0	61922	0	41737.8	0	66203.6	0	34411.7	0	275528	300810	224694	0	77501.8	0	120441	145991	0	56198.4	0	87458.4	0	307809	158638	0	180682	313722	0	202203	0	66136.8	411875
A2VDF0	Fucose mutarotase	FUOM	0.118478	5.26993e+07	2.35247e+07	8.00782e+06	1.20792e+07	1.20606e+07	2.02105e+07	2.49088e+07	1.73316e+07	5.71918e+06	3.57235e+06	2.22761e+07	1.05557e+07	6.7921e+06	6.70824e+06	3.9898e+07	1.64258e+07	1.17868e+07	2.8376e+07	9.95154e+06	5.0521e+07	3.71506e+06	8.4857e+06	2.72495e+06	1.70701e+07	2.92682e+07	1.28665e+07	1.51982e+06	1.44603e+07	1.17762e+07	0	2.05783e+06	7.42207e+06	1.33125e+07	2.50334e+07	9.00704e+06	4.44978e+06	4.75983e+06	4.36162e+06	1.47832e+07	2.15839e+07	4.26027e+06	2.11679e+07	0	2.31805e+07	8.25165e+06	4.27456e+06
A3KMH1	von Willebrand factor A domain-containing protein 8	VWA8	0.00339744	1.70872e+06	5.1256e+06	4.50189e+06	5.9964e+06	5.00923e+06	2.10688e+07	1.23739e+07	795048	1.05285e+07	4.56357e+06	550958	6.70314e+06	1.3311e+07	512558	6.63875e+06	4.91687e+06	8.21981e+06	4.8447e+06	9.50769e+06	2.72774e+07	1.01617e+07	5.74869e+06	8.93666e+06	4.60867e+06	9.13081e+06	4.45408e+06	9.32608e+06	1.05738e+07	6.52278e+06	4.95539e+06	6.34222e+06	8.77004e+06	9.90809e+06	5.38983e+06	1.03868e+07	5.92607e+06	2.30128e+06	6.64781e+06	3.83828e+06	4.10578e+06	2.88317e+06	1.67571e+06	2.85732e+06	4.93849e+06	1.45662e+07	1.66986e+06
A3KN83	Protein strawberry notch homolog 1	SBNO1	0.00243675	0	47915.1	0	0	63743.9	62463.5	124894	10552.1	0	31398.5	718714	287024	53665.1	39429.3	0	0	0	56013.6	0	177438	0	0	439449	0	176278	0	0	125034	0	0	145173	144326	0	0	73301.7	50694.6	78620.5	494578	67556	122596	306633	357728	0	52315.5	316111	93190.6
A6NCS6	Uncharacterized protein C2orf72	C2orf72	0.00234336	6.96031e+06	9.5609e+06	8.08847e+06	8.54914e+06	28421406	8.63481e+06	1.25749e+07	1.42079e+07	4.67745e+06	2.91371e+07	6.90328e+06	1.37397e+07	9.95133e+06	1.98736e+07	1.05934e+07	5.00763e+06	1.49647e+07	6.93452e+06	1.03019e+07	5.6552e+06	1.07564e+07	1.65543e+07	1.00634e+07	8.88567e+06	8.93919e+06	2.24428e+07	1.8424e+07	1.40597e+07	7.20171e+06	3.58562e+06	4.98682e+06	1.94815e+07	5.31795e+06	2.04817e+07	7.42803e+06	5.60941e+06	1.76893e+07	1.00878e+07	8.81815e+06	2.20613e+07	7.78278e+06	1.93866e+07	1.0378e+07	1.11408e+07	607345	1.8925e+07
A6ND91	Putative L-aspartate dehydrogenase	ASPDH	1.26e-09	3.69412e+07	6.12994e+07	3.6996e+07	9.62906e+07	3.9572e+07	5.32622e+07	3.8865e+07	5.46086e+07	3.95783e+07	2.47707e+06	7.93136e+07	2.52652e+07	1.04115e+08	4.32836e+07	5.05792e+07	1.03936e+08	9.99999e+07	7.50478e+07	8.77072e+07	7.02529e+07	3.98474e+07	1.74699e+07	4.76868e+07	3.94324e+07	1.821e+07	7.61425e+06	8.54824e+07	2.14147e+07	1.01977e+08	8.24267e+06	5.72342e+07	3.92926e+06	3.06096e+06	8.34944e+07	4.49408e+07	1.35965e+07	3.786e+07	2.96149e+06	6.88199e+06	5.16808e+06	1.52952e+06	1.52674e+07	0	8.261e+07	1.90123e+07	2.05132e+06
A6NDB9	Paralemmin-3	PALM3	0.000165879	4.5687e+06	8.09474e+06	3.25659e+06	5.74713e+06	1.49848e+06	1.35837e+06	5.59364e+06	2.89244e+06	7.1748e+06	0	1.28233e+07	1.21448e+06	704039	987336	4.20176e+06	3.82898e+06	1.92525e+07	0	4.62414e+06	4.57165e+06	1.23953e+06	4.2149e+06	601304	6.53579e+06	535894	3.49039e+06	4.83175e+06	1.19311e+06	3.89611e+06	4.56467e+06	7.17841e+06	3.49965e+06	1.60041e+06	1.00285e+07	4.73744e+06	297920	190101	3.54458e+06	284972	2.08008e+06	129922	821087	232687	0	3.01057e+06	2.89163e+06
A6NHR9	Structural maintenance of chromosomes flexible hinge domain-containing protein 1	SMCHD1	6.84e-08	0	97318.2	55862.8	58039.9	35458.9	95847.5	44299.4	193491	133008	194777	304423	317459	60077	341250	0	18978.3	73959	62763.6	0	763421	59942.2	41015.7	71259.7	5320.62	215699	64021.3	46948.6	81340	16525	12325.7	192442	154011	58826.4	0	410886	421494	246618	483271	1.42543e+06	337629	932753	2.61453e+06	145288	605111	398170	818641
A6NI72	Putative neutrophil cytosol factor 1B	NCF1B	0.000428103	0	322203	234385	188032	1.04808e+06	0	230144	0	1.40837e+06	435600	0	0	0	110089	0	0	1.42224e+06	0	309368	2.69897e+06	530006	0	626910	382992	218822	0	0	0	0	1.68728e+06	673865	0	1.29657e+06	1.37754e+06	218169	111522	0	335836	2.68953e+06	0	0	0	0	0	2.77609e+06	0
A6NIH7	Protein unc-119 homolog B	UNC119B	4.3e-05	0	0	0	0	0	273806	0	520045	0	0	401319	352143	0	0	0	0	232472	269092	284938	0	0	0	250094	0	884375	726824	0	0	0	0	400903	351204	0	406211	0	0	0	1.57231e+06	376009	0	249275	494937	325979	301988	1.43811e+06	0
A6NLP5	Tetratricopeptide repeat protein 36	TTC36	5.79e-06	4.3062e+06	1.48917e+07	1.24024e+07	4.33043e+07	5.69551e+06	1.20607e+06	6.05244e+07	2.16444e+07	1.81785e+07	0	1.71083e+07	0	5.7428e+06	4.74016e+06	8.22686e+07	6.3924e+06	3.82924e+07	2.52691e+07	4.58451e+07	293696	9.79453e+06	1.01588e+06	1.66131e+07	5.64513e+07	3.07334e+06	2.77959e+06	2.38558e+07	5.75711e+06	5.10388e+07	2.18736e+06	7.63756e+06	0	0	7.48789e+07	5.66361e+06	0	933177	3.11726e+06	0	0	0	0	0	2.17406e+06	3.56996e+07	0
B0I1T2	Unconventional myosin-Ig;Minor histocompatibility antigen HA-2	MYO1G	1.33e-05	0	0	387229	105043	37427.8	25801.3	51711.6	357619	204618	143359	167215	0	0	262968	0	0	79597.2	18714.5	802367	134422	37511.6	0	0	0	131613	0	72289	0	68482.7	71418.8	319552	247416	178675	56801.8	63247.7	501527	191721	0	496834	0	254711	0	0	0	644618	0
O00124	UBX domain-containing protein 8	UBXN8	0.00431501	137254	1.12113e+06	500562	492413	0	0	807579	437559	1.28164e+06	448923	1.82528e+06	89770.2	854059	1.09853e+06	354455	665779	1.20533e+06	211468	459835	58987.8	0	872940	0	2.089e+06	149717	2.67825e+06	597374	606308	966322	0	448924	1.55228e+06	647786	2.64464e+06	790968	0	4.00059e+06	897068	920377	568256	642273	0	268166	606699	1.08776e+06	2.9798e+06
O00139	Kinesin-like protein KIF2A	KIF2A	2.75e-05	117094	475910	161928	0	0	275494	685468	0	504773	0	317499	312100	0	86228.3	0	1.46537e+06	443409	238339	247290	202084	0	0	88433.9	0	519587	195258	0	395451	0	80425	207525	322004	0	0	427216	1.40017e+06	100432	71982.8	1.03058e+06	983930	120796	268530	490732	115737	91874	643060
O00148	ATP-dependent RNA helicase DDX39A	DDX39A	6.15e-07	4.49621e+06	1.67016e+06	3.1133e+06	202807	4.67244e+06	1.24086e+06	2.1648e+06	2.00863e+06	5.38865e+06	1.83687e+06	1.03329e+07	4.01493e+06	4.81929e+06	2.55556e+06	563103	178520	573641	333716	298320	2.97622e+06	405948	1.92847e+06	9.41156e+06	1.24949e+06	4.4282e+06	6.01158e+06	3.2284e+06	8.27809e+06	711631	2.67826e+06	6.22949e+06	3.1016e+06	3.40747e+06	668399	4.29766e+06	3.80387e+06	3.82631e+06	6.92449e+06	6.52792e+06	8.48705e+06	1.17743e+07	2.68543e+07	2.74865e+06	4.4191e+06	1.25193e+07	4.42106e+06
O00160	Unconventional myosin-If	MYO1F	1.58e-09	0	629577	46841.4	124166	0	96938.5	0	262310	1.09879e+06	202671	258866	127484	0	193608	0	200844	744312	122105	1.05303e+06	698104	412513	0	85037.1	0	266651	53195.2	206323	0	0	141240	265046	60763.5	431339	290303	112185	620123	0	59348.1	745588	0	0	0	0	0	64936.8	0
O00182	Galectin-9	LGALS9	0.0101957	933483	3.69924e+06	1.98904e+06	1.0785e+06	1.06526e+06	2.59652e+06	2.52088e+06	0	6.09386e+06	0	1.63762e+06	1.69832e+06	505739	4.27985e+06	0	5.64882e+06	3.75371e+06	2.21452e+06	2.11095e+06	1.39288e+06	2.26415e+06	0	670188	483558	0	173392	1.21407e+06	1.12627e+06	0	4.44716e+06	7.33348e+06	3.19894e+06	2.57174e+06	3.8581e+06	2.74186e+06	6.67492e+06	0	1.7502e+06	2.99221e+06	398242	324027	0	2.34865e+06	0	2.67562e+06	0
O00221	NF-kappa-B inhibitor epsilon	NFKBIE	2.58e-07	226908	71290.4	0	0	0	91656.9	0	124412	0	0	313404	0	0	578909	0	0	85033.8	0	255296	436105	865406	157266	197977	0	82756.9	0	0	0	0	202460	328375	86013.9	0	0	0	133353	0	0	1.07831e+06	211915	0	0	0	0	0	0
O00264	Membrane-associated progesterone receptor component 1	PGRMC1	0.000352805	4.91028e+08	438882300	3.67363e+08	3.30926e+08	3.93986e+08	1.23542e+08	3.83449e+08	4.20155e+08	3.15316e+08	1.34751e+08	5.74288e+08	4.43989e+08	7.48405e+08	6.94907e+08	2.92296e+08	1448042633	3.915e+08	2.95342e+08	6.48324e+08	2.94568e+08	4.99755e+08	8.25404e+08	1.32274e+08	5.81302e+08	3.36764e+08	9.32969e+08	2.59555e+08	2.5736e+08	3.98692e+08	2.23756e+08	2.60826e+08	3.04138e+08	1.45198e+08	447452600	2.93126e+08	1222625955	5.47865e+08	4.20869e+08	2.153e+08	6.29656e+08	1442267624	3.9578e+08	4.71354e+08	539116144	3.11045e+08	2.02085e+08
O00329	Phosphatidylinositol 4,5-bisphosphate 3-kinase catalytic subunit delta isoform	PIK3CD	0.000128193	0	106670	0	29964.9	0	0	0	0	154756	45084.2	0	0	0	28842.2	0	0	74718.9	706072	0	13667.5	0	0	0	0	0	0	134603	0	0	0	0	0	0	0	46443.8	93134	0	0	0	0	0	0	0	0	0	0
O00339	Matrilin-2	MATN2	0.0581636	0	0	0	246068	0	0	0	0	92354.6	0	0	0	0	0	0	0	0	821570	125284	0	0	0	0	0	0	0	0	0	0	0	0	0	0	0	0	0	682799	119075	0	0	0	146116	0	0	0	0
O00391	Sulfhydryl oxidase 1	QSOX1	7.44e-06	0	0	270641	240466	0	1.46249e+06	0	0	0	238722	0	0	0	118311	0	95610.4	0	575159	0	216366	0	55677.1	787388	0	217062	133766	0	51010.8	0	1.24028e+06	322711	0	0	0	5.3325e+06	0	55941.7	0	143802	88506.3	41785.9	121610	371720	0	0	1.19132e+06
O00425	Insulin-like growth factor 2 mRNA-binding protein 3	IGF2BP3	0.0601087	93254.4	43026.8	0	122632	933716	0	42397.6	0	0	132401	2.42252e+07	0	0	196323	0	357724	0	0	0	743927	3.86443e+07	0	3.82538e+06	0	24257.3	1.82129e+06	0	3.00118e+06	0	1.5912e+06	683159	8.45954e+06	1.51411e+06	0	544110	217007	0	2.94407e+07	1.44646e+07	1.64683e+07	0	2.58913e+07	978312	159417	1.12036e+07	444278
O00469	Procollagen-lysine,2-oxoglutarate 5-dioxygenase 2	PLOD2	3.31e-06	2.54653e+06	414700	168874	380270	1.36126e+06	640088	241599	344620	494694	1.63916e+06	1.87747e+06	349552	0	2.50373e+06	262567	2.14162e+06	642214	391205	0	829230	103426	2.75005e+06	264361	88661.5	1.55564e+06	156557	768406	461060	0	940931	2.22846e+06	1.00369e+06	89991.4	247696	1.43421e+06	245135	9.8468e+06	1.83148e+06	4.7586e+06	1.0611e+06	188999	1.27872e+07	419298	347239	153530	3.12097e+06
O00478	Butyrophilin subfamily 3 member A3	BTN3A3	0.0301256	310493	4.7317e+06	1.64589e+06	566526	4.80609e+06	9.23268e+06	1.85375e+06	291582	875620	5.86037e+06	843250	1.52543e+06	0	4.01422e+06	2.12534e+06	1.10773e+06	2.70597e+06	543161	2.70045e+06	1.01953e+06	4.30641e+06	3.22505e+06	563212	647939	0	287564	1.59551e+06	361368	488263	186888	0	217357	148086	1.43498e+06	166520	499575	582058	330472	4.34354e+06	0	0	0	0	0	364402	0
O00534	von Willebrand factor A domain-containing protein 5A	VWA5A	0.00777153	0	358764	579304	943567	0	0	299123	0	143028	461190	315020	5.69575e+06	84559.6	1.86849e+06	0	75274.7	290895	208227	780153	1.45706e+06	1.10955e+06	567767	1.22665e+06	0	678449	0	705618	234564	80472.8	287027	973996	0	963565	0	1.89603e+06	0	0	0	65765.5	0	259826	0	0	0	279119	0
O00748	Cocaine esterase	CES2	5.13e-06	2.61977e+08	4.5375e+08	2.54843e+08	2.39699e+08	2.19692e+08	4.45957e+08	9.82694e+08	401074447	3.8209e+08	1.08501e+08	3.00493e+08	315662854	7.95709e+08	2.27924e+08	2.511e+08	3.18708e+08	2.91645e+08	4.33237e+08	5.27026e+08	1.78611e+08	1.83166e+08	929600779	8.18036e+07	3.84844e+08	5.37388e+08	4.33912e+07	1.7666e+08	2.20685e+08	2.99263e+08	1.21623e+08	3.16993e+08	9.75756e+07	2.61646e+08	5.17998e+08	2.54754e+08	7.01895e+07	1.16264e+08	1.47997e+08	4.4552e+07	2.28596e+08	2.44549e+08	1.40599e+08	1.9667e+08	4.88741e+08	5.69085e+08	1.08811e+08
O00763	Acetyl-CoA carboxylase 2;Biotin carboxylase	ACACB	8.63e-06	758542	1.90595e+06	4.50772e+06	1.06534e+07	3.05104e+06	1.12546e+06	6.55829e+06	2.94997e+06	3.88692e+06	5.53446e+06	2.42117e+06	1.34666e+07	1.7886e+06	629138	1.16185e+07	1.68105e+06	7.34228e+06	896075	6.8189e+06	395998	6.56172e+06	3.1719e+06	6.2376e+06	6.60822e+06	1.28049e+06	8.61423e+06	1.09438e+07	1.57935e+06	3.34549e+06	1.43964e+06	3.49435e+06	1.09794e+07	3.4118e+06	5.34134e+06	452177	8.58943e+06	3.32882e+06	1.02316e+07	855190	5.18498e+06	3.47639e+06	1.54493e+07	1.69526e+06	983044	5.16198e+06	703246
O14498	Immunoglobulin superfamily containing leucine-rich repeat protein	ISLR	0.0306765	0	0	2.90062e+06	1.58869e+06	3.05009e+07	0	0	0	0	0	459665	0	0	5.41047e+06	0	0	0	0	213229	0	0	0	0	0	1.2786e+07	0	0	166454	0	6.28184e+06	2.32035e+06	0	0	1.03567e+06	5.10326e+06	0	0	0	0	0	0	0	0	0	0	0
O14530	Thioredoxin domain-containing protein 9	TXNDC9	0.00066841	0	1.10291e+06	298240	0	0	1.24525e+06	889686	289335	209102	769543	216141	1.22679e+06	428742	0	0	2.60475e+06	642985	324190	0	301569	1.57785e+06	1.01829e+06	1.83815e+06	0	1.05358e+06	2.69917e+06	467470	568595	1.04899e+06	284723	1.59731e+06	2.08789e+06	0	0	638414	0	1.78785e+06	1.58206e+06	1.18934e+06	1.2664e+06	663244	1.49096e+06	2.7949e+06	336367	753345	1.66264e+06
O14727	Apoptotic protease-activating factor 1	APAF1	1.91e-06	0	253424	67068.4	262955	71075.1	87315.1	134997	332290	262056	203688	214662	184486	102940	329876	81642.3	43028.8	1.24759e+06	27852.3	67948.3	728548	83032	334407	93329.7	56002.3	179666	589495	334690	102945	157711	359851	265798	84413.9	0	68432.3	332409	289462	248053	598147	440077	810046	203299	257621	31637.7	335882	329405	347266
O14734	Acyl-coenzyme A thioesterase 8	ACOT8	0.00741513	2.91468e+06	6.4425e+06	1.70443e+06	1.61706e+06	9.88262e+06	3.59907e+07	1.08236e+06	5.86268e+06	5.16868e+06	6.12744e+06	1.58425e+07	6.96628e+06	1.03041e+07	2.08949e+06	4.8188e+06	1.72988e+07	3.28094e+06	8.77734e+06	2.48733e+06	2.53383e+07	3.36173e+06	7.54515e+06	1.39768e+07	2.6002e+06	1.77954e+07	2.54755e+06	4.81389e+06	8.24472e+06	2.09215e+06	4.39862e+06	1.03223e+07	4.78952e+06	3.06872e+06	1.91594e+06	1.75342e+06	9.08844e+06	2.37389e+07	3.43571e+06	898531	1.87536e+06	2.50344e+07	3.62071e+06	2.81928e+06	1.0881e+07	7.51128e+06	1.35592e+06
O14756	17-beta-hydroxysteroid dehydrogenase type 6	HSD17B6	0.000227973	2.0036e+07	1.78295e+08	1.00864e+08	1.72619e+08	3.63962e+08	1.36028e+08	3.76674e+08	7.07234e+07	1.13978e+08	1.57548e+08	2.96239e+07	589770796	2.79422e+08	1.01784e+08	1.86985e+08	575371412	2.8073e+08	3.85751e+08	5.14699e+08	7.36215e+07	1.29212e+06	387077913	2.1693e+08	8.47612e+07	1.92456e+08	2.50732e+08	1.09715e+08	2.30692e+08	1.04842e+08	1.12733e+08	3.13915e+08	8.16086e+07	6.0933e+06	1.6997e+08	2.38738e+08	2.55232e+08	8.6872e+07	4.69654e+08	2.81717e+07	8.66922e+07	1.45489e+08	9.48879e+06	254403917	2.25654e+08	5.56677e+08	2.67477e+07
O14786	Neuropilin-1	NRP1	6.86e-10	403514	3.54534e+06	3.21871e+06	3.53945e+06	1.07058e+06	775697	1.14889e+06	682536	2.71976e+06	1.79848e+06	2.46016e+06	1.40431e+06	718420	4.84938e+06	0	1.23555e+06	2.18906e+06	745388	1.54272e+06	514400	175804	577332	731763	398246	2.42969e+06	747774	733605	339970	413883	2.88708e+06	5.24575e+06	941951	295282	2.67862e+06	4.3519e+06	813311	72037.4	1.53993e+06	963461	862193	533160	242074	1.1365e+06	1.803e+06	1.06808e+06	476608
O14832	Phytanoyl-CoA dioxygenase, peroxisomal	PHYH	0.209243	2.9895e+07	4.66046e+07	1.33218e+07	6.76374e+07	2.59304e+07	1.07903e+07	2.1589e+07	5.80262e+07	9.08114e+07	7.86256e+06	2.19994e+08	5.90423e+07	7.13534e+07	1.5338e+07	5.32899e+07	9.51148e+07	3.26759e+07	3.88642e+07	4.52656e+07	2.49202e+07	4.2074e+07	1.15264e+07	1.87495e+07	4.4874e+07	5.14871e+07	2.9226e+07	1.99216e+07	2.32693e+07	3.79128e+07	1.58735e+07	2.3484e+07	3.24784e+07	1.33975e+07	6.74096e+07	9.23808e+07	5.73132e+07	4.12481e+07	7.82774e+07	1.61233e+07	5.94237e+07	1.07638e+08	1.19327e+08	1.06176e+07	1.65818e+07	1.02433e+08	3.73047e+07
O14907	Tax1-binding protein 3	TAX1BP3	1.58e-08	2.52701e+06	1.76024e+06	3.29781e+06	3.49649e+06	1.60976e+06	0	1.02558e+06	2.61604e+06	1.81927e+06	1.32527e+06	2.62901e+06	1.47394e+06	1.81633e+06	6.73355e+06	0	4.90551e+06	1.60162e+06	5.08145e+06	0	666004	0	1.73724e+06	0	2.79058e+06	4.82102e+06	2.48206e+06	2.76824e+06	2.23788e+06	1.37836e+06	6.43215e+06	2.98536e+06	966162	2.9997e+06	4.39348e+06	4.05403e+06	2.11222e+06	0	2.19157e+06	2.78788e+06	1.14074e+06	0	0	1.56599e+06	2.2649e+06	0	4.91603e+06
O14920	Inhibitor of nuclear factor kappa-B kinase subunit beta	IKBKB	0.000612527	232912	183630	356134	0	0	289717	0	0	109398	204052	394952	0	12583.2	284565	210993	74467	65230.9	0	0	49499.1	97180.6	54287.3	0	89825.1	221038	195631	290372	336240	0	404515	289402	185038	447155	122936	443954	518969	49318.3	110850	134670	0	0	0	266880	0	0	243285
O14929	Histone acetyltransferase type B catalytic subunit	HAT1	0.000157077	389953	1.22996e+06	377603	299134	2.98385e+06	1.30443e+06	2.9848e+06	2.06171e+06	3.49094e+06	3.66903e+06	4.34576e+06	4.45215e+06	1.99968e+06	1.64298e+06	422166	450291	1.09702e+06	378344	2.24142e+06	391034	1.17674e+06	1.63639e+06	1.83422e+06	575221	1.58584e+06	4.19066e+06	251142	2.46448e+06	0	1.2178e+06	2.45298e+06	4.56855e+06	802520	1.45992e+06	1.78132e+06	1586202	2.81683e+06	2.34341e+07	4.63328e+06	5.01715e+06	5.87325e+06	5.27915e+06	2.07667e+06	977063	8.2204e+06	1.6824e+06
O14975	Very long-chain acyl-CoA synthetase	SLC27A2	5.77e-07	3.00025e+07	6.50955e+07	6.49739e+07	8.96025e+07	8.65453e+07	4.39039e+07	7.90667e+07	182299276	1.01115e+08	1.38457e+08	1.04703e+08	1.84645e+08	7.1208e+07	3.08188e+07	1.52378e+08	6.38666e+07	1.19473e+08	7.81994e+07	1.62834e+08	1.01521e+08	9.54331e+07	4.04266e+07	1.05067e+08	1.05465e+08	8.9345e+07	1.63054e+08	1.28177e+08	5.06341e+07	1.11726e+08	6.52265e+07	7.45416e+07	1.0808e+08	7.11372e+06	1.60178e+08	6.34194e+07	6.33339e+07	6.08366e+07	7.4903e+07	5.6323e+07	5.24841e+07	7.04198e+07	7.57878e+07	1.53335e+07	3.46047e+07	6.96166e+07	2.39794e+07
O15020	Spectrin beta chain, non-erythrocytic 2	SPTBN2	0.0117456	0	771356	583954	4.46384e+06	9.03078e+06	714490	5.84842e+06	1.22283e+06	9.72445e+06	24868.4	0	0	558568	656272	2.92815e+06	1.1337e+06	9.6954e+06	4.78445e+06	2.70225e+07	330264	2.30322e+06	219041	1.04432e+06	0	412031	3.57574e+06	5.381e+06	1.12484e+06	2.86393e+06	754308	1.60571e+06	3.01395e+06	126207	5.07073e+06	449184	0	6.96669e+06	1.5309e+07	387675	1.05896e+07	9.89391e+06	0	5274.75	395490	5.35626e+06	179005
O15075	Serine/threonine-protein kinase DCLK1	DCLK1	0.000400883	0	0	0	0	0	0	0	0	0	0	140553	0	0	707075	0	0	0	0	0	0	0	0	0	0	0	0	0	0	0	0	0	0	0	0	320636	0	0	0	0	0	0	0	0	0	0	0
O15085	Rho guanine nucleotide exchange factor 11	ARHGEF11	0.0132147	310973	14349.7	402239	0	91238.6	608859	175898	117648	47751.1	93616.5	223832	389615	133373	370560	0	0	87663.1	0	22749.9	270255	168612	252738	109486	114393	454728	1.54588e+06	0	187592	58253.5	0	130219	453295	226219	71529	265136	56855.4	113215	360112	642565	272673	44301.1	555425	139579	604306	567827	1.03822e+06
O15091	Mitochondrial ribonuclease P protein 3	KIAA0391	0.0125245	186439	582958	0	48630.1	221054	1.19223e+06	1.0759e+06	120017	922648	400879	156117	1.85542e+06	407107	97281	638077	702127	549457	544755	161639	1.39105e+06	129031	212836	757312	347736	322270	2.41403e+06	1.29495e+06	527942	0	229551	1.10568e+06	1.29429e+06	563834	630050	280397	1.92482e+06	525885	317208	1.89936e+06	77850	675441	387722	842143	1.42769e+06	1.12596e+06	1.89619e+06
O15117	FYN-binding protein	FYB	1.49e-05	0	208808	136716	251289	0	0	166133	133385	210191	111041	342613	0	0	751106	0	0	125976	0	424618	0	115442	0	0	0	276807	63521.1	0	0	0	429603	415486	0	400025	0	364798	0	0	0	110572	0	0	0	0	0	281867	0
O15118	Niemann-Pick C1 protein	NPC1	0.000414702	0	0	0	0	0	0	0	0	0	0	0	0	0	131794	0	0	21965.5	491401	0	3.92343e+06	0	0	89729	227071	0	236016	302015	0	0	0	249753	90618	451162	0	0	379789	0	1.28435e+06	1.03279e+06	118231	0	655565	285753	2.53355e+06	78102.3	1.0919e+06
O15164	Transcription intermediary factor 1-alpha	TRIM24	1.13e-06	101863	0	0	0	200285	66806.3	41853.6	0	45788.4	0	34408.1	0	48095.4	0	0	0	0	0	0	0	0	39309.5	43283.8	0	42507.3	0	41153.7	0	0	304610	60299.4	71750.4	0	0	0	129039	72301.5	171678	347258	323382	220635	122881	200069	264103	0	528203
O15245	Solute carrier family 22 member 1	SLC22A1	1.15e-06	0	1.16354e+06	2.8357e+06	5.78698e+06	1.07372e+07	1.27097e+06	8.8484e+06	1.47949e+06	1.73739e+07	755008	0	5.85694e+06	3.20742e+06	678045	7.69863e+06	3.8243e+06	2.2703e+07	1.6546e+07	2.08104e+07	308210	4.73267e+06	9.52485e+06	0	5.22424e+06	0	188478	2.09657e+07	3.14531e+06	6.28079e+06	430169	3.1796e+06	945413	0	1.4451e+07	1.75526e+06	0	1.76938e+06	0	0	511777	1.5562e+06	0	0	167116	1.27451e+06	0
O15247	Chloride intracellular channel protein 2	CLIC2	2.77e-10	458698	9.81278e+06	3.69994e+06	1.1053e+07	1.05183e+06	2.9675e+06	1.64324e+06	4.11305e+06	8.47108e+06	6.04687e+06	6.7447e+06	1.70835e+06	1.48139e+06	8.51103e+06	910739	4.50451e+06	1.1199e+07	4.50124e+06	5.01756e+06	2.15831e+07	4.10119e+06	341343	3.53393e+06	0	3.51956e+06	3.37851e+06	2.63845e+06	1.04597e+06	2.11458e+06	7.1384e+06	4.06661e+06	2.51607e+06	7.14379e+06	9.20417e+06	1.55389e+07	2.86933e+06	0	3.72197e+06	3.28205e+06	1.83717e+06	3.34708e+06	0	609376	250148	969231	0
O15264	Mitogen-activated protein kinase 13	MAPK13	0.000117759	0	0	0	0	0	0	0	0	0	0	644922	0	0	0	0	0	0	0	0	172619	0	0	0	0	0	0	0	0	0	0	0	0	0	0	248718	0	0	3.26262e+06	2.04567e+06	0	0	94996.5	0	0	0	2.19389e+07
O15357	Phosphatidylinositol 3,4,5-trisphosphate 5-phosphatase 2	INPPL1	9.32e-07	467023	211888	149522	45081.8	165578	187723	33909.4	124720	154153	172567	761841	728457	0	57407.3	0	245993	57217.2	271705	100066	187277	863247	395991	44627.6	0	117709	303014	0	59678.6	0	55558.5	604245	135874	43941.9	178995	414343	229109	0	178095	41070.9	998704	170497	149641	30371.2	267369	243723	620315
O15379	Histone deacetylase 3	HDAC3	0.000173139	127200	0	0	0	0	0	108030	0	72188.9	132114	77110.1	220131	0	197335	0	0	91799.4	101895	0	158278	66006.1	177137	138235	0	287712	245842	53706.7	0	0	0	185111	0	0	0	162833	247339	172699	480946	245641	308749	0	330786	0	88106.5	211920	0
O15400	Syntaxin-7	STX7	1.78e-12	1.55971e+06	1.46039e+07	1.54452e+07	1.84237e+07	3.20729e+06	1.50398e+07	3.657e+06	1.25824e+07	1.69444e+07	7.31706e+06	1.35311e+07	5.85021e+06	1.24325e+07	1.69897e+07	2.50903e+06	1.66135e+07	1.33057e+07	1.60794e+07	1.08152e+07	9.47945e+06	4.94174e+06	6.9984e+06	1.10202e+07	9.25871e+06	16032307	6.69385e+06	1.43775e+07	4.87774e+06	3.49789e+06	2.55932e+07	1.72975e+07	9.51482e+06	3.82823e+07	1.00029e+07	1.93944e+07	1.34502e+07	3.2886e+06	1.2641e+07	1.38443e+07	1.47407e+07	1.04712e+07	1.60601e+07	4.87869e+07	1.70305e+07	7.19259e+06	2.47587e+07
O15446	DNA-directed RNA polymerase I subunit RPA34	CD3EAP	8e-05	0	0	0	160547	0	334952	0	0	256989	284012	1.17967e+06	101034	82624.7	331735	272812	0	0	0	0	257757	0	0	833153	0	1.0129e+06	0	0	257919	0	0	743641	400177	0	0	0	0	1.18341e+06	2.75877e+06	614822	390419	0	1.99742e+06	0	1.0092e+06	619271	0
O15460	Prolyl 4-hydroxylase subunit alpha-2	P4HA2	3.06e-06	1.76834e+06	1.1373e+06	0	164637	6.77317e+06	235769	63537.1	1.38761e+06	79938.5	506775	4.47893e+06	83715.2	169029	627583	0	1.17951e+06	350312	531495	429731	0	0	3.57787e+06	608860	0	2.51711e+06	0	484601	263004	0	2.211e+06	2.87632e+06	0	1.22012e+06	0	701478	0	4.88451e+06	1.61823e+06	197356	0	0	612628	0	371144	116511	2.08838e+06
O43148	mRNA cap guanine-N7 methyltransferase	RNMT	4.23e-08	0	1.64133e+06	208616	226191	756716	430823	577463	3.30512e+06	953860	591152	4.75331e+06	751217	2.36856e+06	1.48866e+06	0	963246	1.16658e+06	993374	323162	387885	243068	1.68395e+06	1.71164e+06	233956	1.30642e+06	551165	138104	1.02963e+06	0	483225	1.60052e+06	1.94704e+06	277430	0	569141	212894	3.2886e+06	3.65614e+06	3.53741e+06	2.22952e+06	3.79764e+06	3.42758e+06	61063.5	1.66644e+06	2.30994e+06	4.94935e+06
O43172	U4/U6 small nuclear ribonucleoprotein Prp4	PRPF4	9.61e-12	1.93133e+06	1.3812e+06	3.08749e+06	1.84991e+06	1.83048e+06	5.25449e+06	1.65764e+06	1.11239e+06	2.30497e+06	3.048e+06	1.49916e+06	5.23438e+06	2.19445e+06	9.16604e+06	405081	1.92082e+06	1.87477e+06	2.08852e+06	832716	496053	1.81954e+06	610014	2.18314e+06	1.29982e+06	3.02797e+06	4.84048e+06	2.99213e+06	2.73664e+06	814896	1.89865e+06	3.53017e+06	3.38431e+06	561743	1.04326e+06	3.38412e+06	2.06318e+06	6.4313e+06	8.64579e+06	4193695	6.11598e+06	7.62041e+06	5.33677e+06	6.54335e+06	2.98065e+06	7.34003e+06	3.64325e+06
O43252	Bifunctional 3-phosphoadenosine 5-phosphosulfate synthase 1;Sulfate adenylyltransferase;Adenylyl-sulfate kinase	PAPSS1	0.00403083	1.20376e+06	287722	1.49139e+06	639743	434578	1.5039e+06	2.43347e+06	611464	877835	586750	653784	2.64638e+06	1.49353e+06	4.64531e+06	1.17343e+06	3.9387e+06	647892	697296	1.2478e+06	1.46906e+06	325517	2.10203e+06	1.05515e+06	299920	2.92095e+06	1.48453e+06	891535	844518	357397	1.55455e+06	2.28151e+06	653449	1.06572e+06	287158	1.52792e+06	3.35878e+06	786645	723475	524287	1.65708e+06	873711	1.32865e+06	0	2.11657e+06	1.35253e+07	2.34648e+06
O43294	Transforming growth factor beta-1-induced transcript 1 protein	TGFB1I1	0.000532764	0	1.73686e+06	1.2233e+07	1.08596e+07	484370	26464.1	2.07362e+06	0	1.36959e+06	872365	3.25282e+06	0	224878	3.21664e+06	102004	694858	395607	2.03375e+06	1.1264e+06	0	1.95807e+06	873967	0	0	1.01333e+07	1.69877e+06	793213	888176	1.86747e+06	1.53287e+07	1.05744e+07	0	192466	6.49708e+06	6.46523e+06	0	0	3.02447e+06	0	0	776246	0	918405	0	429750	0
O43299	AP-5 complex subunit zeta-1	AP5Z1	0.00223891	81473	80447	0	0	0	337946	0	0	148308	8946.01	615543	0	0	45795.8	0	83705.9	0	0	0	0	0	0	0	0	51094.6	0	0	145767	0	0	52003.5	22164.6	631288	0	0	0	0	0	72581.7	0	437009	197323	182116	110709	474287	104088
O43301	Heat shock 70 kDa protein 12A	HSPA12A	0.37305	0	0	472457	2.66387e+06	0	72941.1	0	105589	0	0	475171	58134.2	0	307422	0	0	0	411585	3.02392e+06	68223.5	0	0	0	0	359683	0	0	0	0	111073	234943	0	0	4.96421e+06	1.22044e+06	0	0	453439	218168	0	0	0	0	0	6.85962e+06	0
O43318	Mitogen-activated protein kinase kinase kinase 7	MAP3K7	0.0163099	900472	220182	98088.1	0	0	0	254928	54105.4	206989	0	104136	297407	227601	106241	131437	93444.9	227093	711333	67700.7	0	157636	113422	245738	198087	109437	0	210218	70106.5	44155.5	89472.3	1.32663e+06	93220.1	34056	173786	93282.6	0	263020	120337	268803	446703	382152	508793	334262	354642	160807	528890
O43347	RNA-binding protein Musashi homolog 1	MSI1	0.0012821	404024	730349	1.92406e+06	0	0	220981	0	0	0	0	0	947292	0	570875	171280	1.27093e+06	1.04761e+06	786312	0	287340	0	0	0	0	854021	1.05285e+06	0	329313	0	0	0	1.43994e+06	0	0	1.60741e+06	3.2773e+06	508486	93040.9	3.65519e+06	0	1.22557e+06	2.77277e+06	0	0	795822	3.50706e+06
O43395	U4/U6 small nuclear ribonucleoprotein Prp3	PRPF3	0.000675742	686467	237035	1.26229e+06	0	1.53658e+06	4.23846e+06	277418	525118	881220	0	1.12502e+06	2.77735e+06	998868	2.7609e+06	735726	969542	438643	371040	0	126020	1.20334e+06	123747	598996	758373	1.51559e+06	1.74205e+06	451375	1.11277e+06	0	807672	1.1753e+06	2.62095e+06	343284	414945	533851	0	2.40309e+06	3.16866e+06	1.31292e+06	2.51718e+06	6.20346e+06	4.49786e+06	6.81738e+06	627884	2.72687e+06	732722
O43427	Acidic fibroblast growth factor intracellular-binding protein	FIBP	0.00110341	372220	245606	118491	0	0	0	0	0	0	0	0	0	0	509355	0	202896	260451	279448	637403	0	381448	364637	192717	0	0	366165	195387	127565	0	0	150164	862832	0	272870	0	750714	0	312701	8.40675e+06	252068	283257	1.56569e+06	94043.1	423533	1.58235e+06	3.24605e+06
O43447	Peptidyl-prolyl cis-trans isomerase H	PPIH	0.00137339	340908	620074	778162	400484	458919	3.83338e+06	0	687135	431016	805604	1.41812e+06	2.49398e+06	1.14522e+06	3.0102e+06	0	1.64589e+06	1.06071e+06	5.19574e+06	0	776816	0	632304	0	327413	1.73377e+06	1.53832e+06	0	2.27921e+06	0	595981	1.35493e+06	2.25783e+06	0	564939	778905	1.16067e+06	367948	2.43532e+06	4.10915e+06	1.60075e+06	6.28835e+06	1.82443e+06	2.13699e+06	718616	1.78902e+06	227922
O43491	Band 4.1-like protein 2	EPB41L2	8.7e-08	2.43122e+06	1.36529e+07	1.09348e+07	1.87883e+07	5.11393e+06	3.55863e+06	1.31128e+07	4.82025e+06	1.17196e+07	4.5534e+06	1.10417e+07	2.75272e+06	1.31992e+07	1.1911e+07	2.61828e+06	1.13643e+07	7.84262e+06	2.01425e+07	7.24931e+06	1.65197e+06	5.83649e+06	1.29848e+07	2.68222e+06	1.03047e+06	7.33073e+06	1.90499e+06	5.89498e+06	3.89634e+06	1.97708e+06	1.70654e+07	1.37514e+07	4.97818e+06	4.50709e+06	8.80543e+06	1.68588e+07	2.57456e+06	2.31435e+06	5.30692e+06	4.24322e+06	1.41919e+07	4.57709e+06	2.51012e+07	4.08061e+06	745820	6.4499e+06	3.82144e+07
O43516	WAS/WASL-interacting protein family member 1	WIPF1	6.1e-07	0	134637	0	0	0	152657	0	0	0	0	0	0	0	0	0	0	0	152359	0	0	189588	0	0	0	0	0	124478	220353	0	744513	0	0	67046.3	200354	108121	0	0	0	608079	0	0	0	0	0	0	0
O43639	Cytoplasmic protein NCK2	NCK2	3.81e-07	0	0	0	493977	0	0	0	0	0	0	0	0	0	119376	0	0	0	0	0	0	0	184217	0	0	0	95039.1	0	200219	0	131128	100204	0	0	416127	420393	0	1.20974e+06	85068.2	0	0	0	928046	359890	0	0	1.61822e+06
O43665	Regulator of G-protein signaling 10	RGS10	2.26e-09	0	0	0	0	0	0	0	0	0	0	915127	0	0	884071	0	0	0	830579	0	0	452750	0	0	275988	0	0	0	0	0	0	0	0	0	0	0	0	0	0	0	0	0	4.65642e+06	0	0	0	436175
O43704	Sulfotransferase family cytosolic 1B member 1	SULT1B1	5.99e-06	5.52653e+07	1.20923e+07	1.13365e+07	9.21919e+06	1.06509e+07	2.56419e+07	1.7262e+07	6.70134e+06	1.27276e+07	5.58386e+06	1.80952e+06	203061	2.29103e+07	1.0215e+07	1.58292e+07	6.14978e+06	3.00335e+07	2.22259e+07	4.35327e+07	1.61682e+06	3.17534e+07	269566	5.68562e+06	115425246	3.16347e+06	1.11617e+07	1.94035e+07	6.65437e+06	2.25446e+07	913089	5.09862e+06	3.73594e+06	3.36846e+07	1.08954e+07	1.68558e+06	410308	179164	194290	144079	2.40986e+06	951633	619217	5.26854e+06	295525	0	1.55188e+06
O43708	Maleylacetoacetate isomerase	GSTZ1	2.71e-07	5.84988e+07	7.27895e+07	6.76027e+07	1.59917e+08	1.42738e+08	3.4365e+07	7.71488e+07	1.55165e+08	5.67869e+07	9.37506e+06	2.05737e+08	4.53131e+07	9.60012e+07	1.2778e+07	1.31071e+08	5.61756e+07	8.09045e+07	6.09965e+07	1.18789e+08	5.63869e+07	8.45974e+07	2.95755e+07	5.13417e+07	1.17742e+08	4.35038e+07	1.10136e+07	9.22783e+07	3.91973e+07	2.59409e+08	5.99861e+06	4.73684e+07	3.36421e+07	2.41165e+07	1.68239e+08	3.74167e+07	1.83402e+07	1.2912e+08	2.46464e+07	1.65062e+07	2.55553e+07	63370673	1.96334e+07	5.36999e+06	4.44611e+07	4.9134e+07	2.05063e+07
O43741	5-AMP-activated protein kinase subunit beta-2	PRKAB2	3.1e-06	1.96956e+07	1.88793e+07	1.31926e+07	1.42117e+07	2.12298e+07	6.73009e+06	2.49928e+07	5.79539e+06	1.49486e+07	1.55559e+07	1.00149e+07	2.29573e+07	10739189	5.53921e+06	1.72889e+07	6.14202e+06	5.02e+07	1.27569e+07	2.49885e+07	2.02677e+07	1.11802e+07	1.09988e+07	7.97091e+06	2.64954e+07	1.74937e+07	1.77448e+07	1.92592e+07	8.54059e+06	8.43192e+06	1.22925e+07	1.46847e+07	2.05958e+07	1.81848e+07	2.88672e+07	5.7501e+06	1.57037e+07	1.04393e+06	2.60862e+07	2.29476e+07	1.20791e+07	2.56527e+06	2.50671e+07	881748	1.04319e+07	4.73902e+07	2.08312e+07
O43752	Syntaxin-6	STX6	2.22e-07	0	692158	398283	364241	203746	1.1282e+06	0	50987.6	539234	0	806740	1.17993e+06	269169	1.35579e+06	0	478941	0	0	0	134118	393733	0	486991	0	859800	1.33561e+06	423188	762048	0	318859	405854	131982	1.37766e+06	744156	2.39915e+06	1.67857e+06	0	231268	2.629e+06	1.43909e+06	1.23522e+06	2.08487e+06	948086	463556	3.10598e+06	3.01957e+06
O43815	Striatin	STRN	5.68e-08	213807	1.50114e+06	1.0404e+06	652638	536637	474071	944309	564171	596506	136404	972251	1.69225e+06	917832	260620	0	868644	884646	119162	530947	0	87352.1	520926	758270	673780	676772	2.07181e+06	677471	334171	194675	88080.6	1.35636e+06	555484	373298	361462	859450	929034	3.69599e+06	1.25209e+06	875061	938349	1.41874e+06	3.74189e+06	963062	1.77968e+06	794832	1.35365e+06
O43819	Protein SCO2 homolog, mitochondrial	SCO2	0.0222865	2.43435e+06	1.70703e+06	654788	4.63238e+06	2.78912e+06	1.15858e+07	1.38453e+06	4.31874e+06	5.76229e+06	5.80407e+06	6.60586e+06	5.37867e+06	5.86594e+06	2.86577e+06	1.87407e+06	647926	1.98598e+06	7.08947e+06	5.13804e+06	3.58221e+06	6.64153e+06	1.51952e+06	7.61912e+06	2.7429e+06	4.29771e+06	4.0933e+06	1.84104e+06	8.74103e+06	603308	651624	4.05336e+06	8.57605e+06	2.36629e+06	3.85339e+06	3.10449e+06	2.92727e+06	1.17794e+06	246666	8.76017e+06	4.96004e+06	4.76024e+06	5.08636e+06	5.96817e+06	4.68004e+06	1.0362e+06	3.19574e+06
O43826	Glucose-6-phosphate translocase	SLC37A4	3.76e-05	1.83178e+07	2.93728e+07	6.0382e+06	4.6179e+07	1.14079e+07	5.06545e+07	4.25248e+07	9.28792e+06	4.99567e+06	2.55258e+07	3.66277e+07	2.75361e+07	2.5148e+07	2.42732e+07	2.7142e+07	2.10462e+07	3.62363e+07	2.7004e+07	1.9811e+07	5.92668e+07	1.54113e+07	9.02498e+06	1.23963e+07	5.92488e+06	1.46662e+07	3.07339e+07	2.45031e+07	7.41785e+06	1.61971e+07	2.85579e+06	1.8815e+07	3.6395e+07	4.95048e+06	2.96979e+07	2.15291e+07	3.26467e+07	7.35343e+06	3.44608e+06	2.14574e+07	1.48579e+07	1.35783e+07	1.20998e+07	1.95647e+06	2.07265e+06	1.91208e+07	1.86035e+07
O43903	Growth arrest-specific protein 2	GAS2	0.00329411	2.07243e+06	372290	2.07934e+06	4.84671e+06	2.22018e+06	393563	2.17022e+06	4.03429e+06	3.25844e+06	182677	1.42259e+06	2.78297e+06	1.11056e+06	1.45627e+06	1.40441e+06	3.48978e+06	4.76033e+06	1.14137e+06	5.48644e+06	1.68514e+06	5.19271e+06	9.28061e+06	3.06957e+06	2.98479e+06	2.64977e+06	441592	4.2502e+06	1.42896e+06	2.02471e+06	2.13634e+06	795587	1.12228e+06	1.58778e+06	9.27749e+06	424403	181432	2.30914e+06	2.36631e+06	3.39447e+06	1.20533e+06	174770	2.22817e+06	1.59414e+06	1.14381e+06	1.45167e+06	6.36686e+06
O43924	Retinal rod rhodopsin-sensitive cGMP 3,5-cyclic phosphodiesterase subunit delta	PDE6D	0.00113193	0	0	2.31038e+06	0	1.20357e+06	2.30018e+06	1.28667e+06	0	2.00317e+06	0	0	0	0	0	0	2.25839e+06	0	2.61265e+06	2.34243e+06	0	0	0	0	0	0	0	0	0	0	0	0	0	2.51008e+06	0	0	0	0	2.33126e+06	1.50044e+06	2.58174e+06	1.10472e+07	1.65628e+06	2.27427e+06	0	3.04854e+06	1.94501e+06
O43929	Origin recognition complex subunit 4	ORC4	4.98e-05	0	0	204125	0	0	0	0	0	0	0	556045	0	0	0	0	0	0	0	0	0	0	147344	197236	0	0	247410	0	0	0	0	105110	0	0	0	0	0	375909	256733	0	206179	359223	419002	115673	176725	1.83748e+06	296005
O60216	Double-strand-break repair protein rad21 homolog	RAD21	1.23e-05	168646	597272	324931	246501	3.32294e+06	1.26959e+06	2.0235e+06	960407	1.45568e+06	96056.7	3.58595e+06	1.29359e+06	2.40364e+06	529688	176548	1.9392e+06	216837	159762	0	0	923810	0	2.03726e+06	529147	3.07022e+06	570016	121397	586601	0	702086	2.01529e+06	905572	152045	771218	1.45146e+06	1.46288e+06	2.09311e+06	6.70974e+06	3.11466e+06	8.60009e+06	1.09635e+07	2.10918e+06	1.29642e+06	2.65007e+06	4.56781e+06	747823
O60220	Mitochondrial import inner membrane translocase subunit Tim8 A	TIMM8A	0.00709577	1.16344e+07	2.91778e+07	8.40613e+07	2.92369e+07	8.21918e+07	1.55448e+08	4.48007e+07	5.43703e+07	5.97462e+07	3.62577e+07	1.43072e+08	3.45492e+07	8.96307e+07	2.69445e+07	4.08207e+07	1.41815e+08	2.762e+07	2.52802e+08	9.88356e+07	1.31779e+07	2.06704e+08	7.54357e+07	7.12504e+07	5.00704e+07	1.40371e+08	2.01085e+07	5.54478e+07	8.33633e+07	5.97807e+07	4.95095e+07	9.90632e+07	9.15623e+07	4.63743e+07	2.14927e+07	2.13039e+07	1.11839e+08	6.56438e+07	1.71934e+07	3.96119e+07	1.42996e+07	5.37341e+08	5.91276e+07	112051079	8.56986e+07	1.28516e+08	2.21385e+07
O60231	Putative pre-mRNA-splicing factor ATP-dependent RNA helicase DHX16	DHX16	0.0036865	387502	556651	307450	193923	308584	274659	159081	211082	273062	395484	1.82927e+06	154479	545747	1.00362e+06	176952	293649	286995	661134	92814.1	0	0	237464	211415	186554	1.38046e+06	178419	0	389082	0	439088	611509	140915	359997	140643	156286	0	1.23349e+06	1.48656e+06	1.07713e+06	664239	938461	829574	318703	93969	589477	374902
O60234	Glia maturation factor gamma	GMFG	2.53e-13	1.96072e+06	477844	7.16728e+06	1.38051e+06	3.72915e+06	5.03009e+06	5.71597e+06	271261	7.25281e+06	5.72331e+06	1.03434e+06	0	1.24088e+06	6.39801e+06	890119	0	3.42721e+06	5.40213e+06	5.94374e+06	4.35246e+06	1.36869e+06	1.3765e+06	2.42429e+06	3.01532e+06	3.14959e+06	3.18497e+06	6.83101e+06	2.63292e+06	1.1659e+06	7.11887e+06	3.29226e+06	2.20031e+06	1.01039e+07	5.80985e+06	6.90585e+06	3.91617e+06	916189	2.77015e+06	7.00732e+06	1.38285e+06	1.81033e+06	694901	3.45219e+06	889212	6.05073e+06	1.10423e+06
O60244	Mediator of RNA polymerase II transcription subunit 14	MED14	0.0056202	0	0	0	0	0	91397.9	29664.9	61858.1	86587.4	0	0	81554.8	0	0	0	0	0	0	0	0	0	29849	0	0	103680	0	0	0	0	123648	17387.5	609467	0	0	0	0	72563.8	0	128007	105815	211261	34393	0	50695.2	518427	191472
O60264	SWI/SNF-related matrix-associated actin-dependent regulator of chromatin subfamily A member 5	SMARCA5	4.89e-09	213051	139030	114860	283875	521258	18188.3	295481	264573	621145	55192.5	803105	1.89323e+06	217414	1.06574e+06	65300.7	901620	61294.1	523443	53580.9	861856	161257	0	678516	549867	398186	51624.9	664683	346119	85807.9	114241	566012	1.01553e+06	147727	317402	169639	303984	395278	831649	1.94906e+06	339655	800785	855571	662525	1.23318e+06	888034	1.61308e+06
O60292	Signal-induced proliferation-associated 1-like protein 3	SIPA1L3	0.00218879	31633.6	2.19721e+06	615095	345936	331620	48972.4	4.62526e+06	561747	1.15672e+07	1.2648e+06	120517	175344	0	105592	6.54757e+06	1.78522e+06	2.77754e+06	169141	4.17752e+06	39445.8	3.84413e+06	78963.9	360179	128216	718206	5.4259e+06	3.46577e+06	0	213738	2.50696e+06	861946	2.81766e+06	0	814965	195067	40645.8	0	58661.4	348600	4.18037e+06	4.96397e+06	283484	239304	61397.8	818527	557843
O60306	Intron-binding protein aquarius	AQR	0.000160725	0	0	204875	67246.6	371227	264289	752090	159124	26152.4	91207.5	165185	1.22543e+06	235098	121914	0	38029.2	128744	37371.1	63785.3	160122	259312	660619	275569	0	106451	0	29820.8	0	127367	95947.9	582241	58778.4	32101.7	130158	136492	289889	753867	235928	163963	147028	617701	137715	245038	727929	59673.3	655652
O60341	Lysine-specific histone demethylase 1A	KDM1A	0.00019843	155812	302568	611028	408187	309539	126055	625263	95518.7	301314	359343	1.1702e+06	851408	625015	1.4654e+06	128495	154959	283974	0	389671	357454	188529	140791	369561	104626	286079	588681	264003	68312.8	0	425228	980389	189656	0	452090	7.24463e+06	769162	987976	2.13705e+06	1.05043e+06	1.9668e+06	2.2734e+06	3.03227e+06	735268	1.50784e+06	123644	796834
O60449	Lymphocyte antigen 75	LY75	0.0790339	0	0	0	0	0	0	0	0	0	0	0	0	0	13134	0	0	393922	593844	0	30976.9	0	0	0	0	216055	0	0	148677	0	0	0	0	28848.9	0	37521.6	0	0	0	0	0	0	0	15325.2	0	14727.1	0
O60486	Plexin-C1	PLXNC1	0.228221	0	0	0	0	0	0	0	0	0	0	222114	0	0	0	0	0	0	0	0	0	0	0	0	0	0	0	0	0	0	0	89262.6	0	351016	0	0	48634.2	0	54961.3	85548.3	0	0	0	0	0	275090	0
O60496	Docking protein 2	DOK2	6.2e-06	0	0	0	0	0	130448	0	0	388388	0	99654.2	0	0	0	0	0	0	0	0	0	78749.4	0	0	0	195083	191168	88761.4	0	0	480519	53695.4	0	491687	937167	0	0	0	0	747242	101828	0	0	0	0	0	0
O60508	Pre-mRNA-processing factor 17	CDC40	0.00219685	0	280538	0	99691.8	112503	0	0	0	0	0	203782	246990	313959	345136	120786	0	463948	87005.4	0	406144	0	0	237611	0	0	30173.2	0	78869.7	0	56393.9	404869	138791	0	0	96384.1	162568	521180	867574	334899	1.14583e+06	1.03072e+06	959393	0	487488	230141	634722
O60656	UDP-glucuronosyltransferase 1-9	UGT1A9	0.000388235	1.24322e+08	9.50701e+07	5.86783e+07	5.31197e+07	5.60716e+06	3.95269e+07	1.33408e+06	8.35179e+07	2.37145e+07	2.15249e+07	1.23676e+08	8.76088e+07	6.43178e+07	3.12808e+06	1.26554e+08	3.41391e+07	50913997	1.78303e+07	6.32976e+07	2.30592e+08	4.50277e+07	0	4.22205e+07	3.21769e+07	1.11436e+08	2.91819e+07	51891068	4.10496e+07	1.26941e+08	2.68801e+06	7.24851e+07	1.11552e+07	0	3.1385e+07	9.16362e+06	5.89523e+07	4.1636e+07	334436	7.18543e+06	3.85543e+07	1.85622e+06	1.88365e+07	13152924	2.24775e+08	2.74481e+07	180309
O60711	Leupaxin	LPXN	1.46e-08	577223	2.95304e+06	531373	626879	130303	0	157499	698365	1.41987e+06	0	127074	0	590678	1.05234e+06	0	129074	251232	158869	1.20833e+06	474103	335324	399306	240668	0	69730.6	1.21823e+06	1.44082e+06	199883	288186	244900	1.65461e+06	5.42227e+06	4.7031e+06	750601	3.97668e+06	449282	0	231948	1.08174e+06	273048	0	0	0	0	206315	184570
O60828	Polyglutamine-binding protein 1	PQBP1	1.22e-07	781797	499118	0	0	1.16109e+06	862497	687249	0	936212	900404	0	0	547129	991845	624354	0	0	1.06987e+06	0	305341	0	848017	2.02416e+06	386612	0	839330	0	779475	417903	1.46739e+06	0	721601	0	1.18346e+06	0	431597	2.99529e+06	2.72724e+06	2.81157e+06	5.73564e+06	1.00638e+07	4.37497e+06	0	1.17244e+06	4.19105e+06	2.63656e+06
O60885	Bromodomain-containing protein 4	BRD4	1.66e-05	109055	206752	40319	66996.4	44441.5	0	21319.9	0	21418.4	642771	318104	256646	72742	155986	0	0	181762	186511	111026	35466.8	648015	69530.3	297570	0	239471	186176	0	55641.3	26856.4	0	182013	64564.3	0	0	284247	107425	278080	732747	55031.5	266315	303998	734214	297498	350386	192075	0
O60934	Nibrin	NBN	4.31e-06	0	662142	239023	127813	198386	189058	150790	102401	122788	143939	1.65367e+06	271558	238960	440817	0	338434	467773	672257	0	1.09142e+06	99130.7	405631	224714	0	869145	1.28685e+06	353537	193874	0	126633	457120	165266	85375	201372	462210	242914	141016	3.7619e+06	826216	2.20673e+06	1.13669e+06	1.24908e+06	840937	1.63882e+06	1.00122e+06	635489
O60942	mRNA-capping enzyme;Polynucleotide 5-triphosphatase;mRNA guanylyltransferase	RNGTT	0.00142007	0	0	0	0	0	52950.6	0	0	0	0	82692.2	438114	334820	662559	0	0	151301	159170	0	0	263039	144409	0	0	0	0	0	302274	0	0	175002	194720	0	43439.3	84331	112694	208524	249977	179732	1.40378e+06	372147	158293	154902	268771	357807	137495
O75150	E3 ubiquitin-protein ligase BRE1B	RNF40	0.0211008	0	1.24173e+06	122849	0	298565	0	252747	254355	207339	7.98121e+06	1.08133e+06	565735	544394	593059	103538	4.91121e+06	88721.7	3.04511e+06	1.02653e+06	0	132019	161129	322758	2.7837e+06	479475	533118	147540	269796	1.28175e+06	5.31305e+06	326161	2.59691e+06	0	358807	225633	344080	2.58346e+06	1.3034e+06	1.52689e+06	833143	1.47001e+06	2.42135e+06	195314	893999	825939	3.62315e+06
O75152	Zinc finger CCCH domain-containing protein 11A	ZC3H11A	4.24e-06	84188.8	29041.8	26120.9	14483.8	11049.2	31222.6	12653.9	0	157255	48901.2	51896.6	165222	103197	287214	98881.8	45251.4	172475	0	100351	21748	227175	46884.6	66347.4	0	310266	151014	0	28031.7	0	81737	226561	220417	46007.1	87330.2	205670	57979.5	182872	1.2884e+06	1.11506e+06	691906	1.36266e+06	68292.4	269431	139096	1.04655e+06	0
O75191	Xylulose kinase	XYLB	0.000387874	2.70583e+07	4.57251e+07	2.26752e+07	3.22605e+07	1.717e+07	1.5531e+07	4.55862e+07	2.71359e+07	1.84483e+07	1.27465e+07	2.64238e+07	7.84254e+06	1.28026e+07	2.25288e+07	1.14748e+07	1.99707e+07	6.04814e+07	2.81001e+07	4.19776e+07	8.32365e+06	1.65602e+07	1.88508e+07	1.52243e+07	1.86343e+07	3.43476e+07	2.80926e+07	1.20723e+07	2.00392e+07	5.11553e+07	2.80644e+07	2.42204e+07	1.40699e+07	1.61851e+06	4.15057e+07	2.79507e+07	1.18822e+07	6.26869e+07	3.18847e+07	5.14248e+07	2.94278e+07	3.76129e+07	3.82963e+07	1.87412e+07	4.10253e+07	1.5009e+06	29404143
O75208	Ubiquinone biosynthesis protein COQ9, mitochondrial	COQ9	1.76e-07	1.92393e+06	3.06092e+07	3.34059e+07	2.15129e+07	4.30058e+07	5.72462e+07	4.99916e+07	3.87165e+07	2.88764e+07	9.55378e+06	7.70505e+07	4.62971e+07	3.55814e+07	1.04135e+07	4.49942e+07	3.7909e+07	3.97714e+07	2.74688e+07	4.16268e+07	5.97836e+07	1.09274e+07	4.49639e+07	82927684	2.06531e+07	4.66624e+07	2.25087e+07	3.27845e+07	4.1753e+07	2.55812e+07	2.84578e+07	7.18209e+07	1.68603e+07	8.19069e+07	4.08086e+07	2.08698e+07	23338984	3.08566e+07	1.74494e+07	9.87057e+06	2.00358e+07	2.1356e+07	1.11128e+07	9.45749e+06	1.77047e+07	4.79779e+07	1.36384e+07
O75368	SH3 domain-binding glutamic acid-rich-like protein	SH3BGRL	1.56e-06	1.75289e+06	29036505	1.30812e+07	1.75411e+07	0	1.63888e+07	1.25379e+07	1.09123e+07	2.1912e+06	9.26869e+06	8.2148e+06	6.41104e+06	0	1.73958e+07	948806	3.24319e+07	4.34382e+06	3.64225e+07	1.85604e+07	6.51562e+06	2.38215e+06	7.49304e+06	786426	757300	1.98891e+07	5.99024e+06	5.53533e+06	3.56369e+06	4.96462e+06	2.65182e+07	5.25372e+07	4.71793e+06	4.25706e+06	6.7092e+06	2.78168e+07	5.44764e+06	534176	6.80303e+06	3.61409e+06	0	9.50784e+06	0	7.18124e+06	0	1.86045e+07	977895
O75400	Pre-mRNA-processing factor 40 homolog A	PRPF40A	3.68e-05	170075	988542	478887	691477	631960	2.7378e+06	1.46063e+06	150233	506173	201312	6.84634e+06	2.18093e+06	1.68109e+06	2.64094e+06	442781	1.7935e+06	2.1415e+06	994555	215230	1.0021e+06	1.66807e+06	581956	1.93005e+06	644183	990380	906361	1.31649e+06	1.10346e+06	0	1.39602e+06	3.11242e+06	1.99848e+06	159542	1.60016e+06	2.53084e+06	95253.6	5.74615e+06	4.26525e+06	4.3755e+06	2.03854e+06	3.71652e+06	2.64602e+06	1.60415e+06	271200	4.05941e+06	1.20084e+06
O75427	Leucine-rich repeat and calponin homology domain-containing protein 4	LRCH4	1.3e-05	426818	1.11328e+06	260132	0	155300	62978	0	0	299029	130994	64780.9	75050.8	332864	118602	0	0	774093	604026	153513	384957	0	0	109226	0	267771	222811	378143	259205	0	222983	921902	273067	234287	77636.1	610922	0	0	51357	306890	0	141663	137987	111170	175013	685921	519648
O75448	Mediator of RNA polymerase II transcription subunit 24	MED24	0.387332	0	0	125984	17506.5	33691	0	218997	54894.2	164414	29285.2	103123	0	131659	122171	68716.6	0	0	0	0	223481	0	134256	67334.6	0	108187	0	30401.6	26112.3	1.70974e+07	0	298072	0	0	40373.5	45910.6	0	8.68171e+06	577266	160896	336611	102214	230220	0	0	45734	100911
O75452	Retinol dehydrogenase 16	RDH16	0.000183684	1.47477e+07	3.20764e+08	1.4161e+08	570018265	3.91585e+08	8.76561e+07	2.61215e+08	5.25095e+07	2.89159e+08	1.47254e+08	5.08929e+07	1.61406e+08	1.81245e+08	7.62569e+07	1.49218e+08	1.71809e+08	2.55612e+08	1.77038e+08	3.90889e+08	1.16028e+08	2.24324e+08	9.51643e+07	4.48327e+08	108452769	9.26924e+07	2.10197e+08	2.21269e+08	1.45392e+08	3.50242e+08	1.16712e+08	2.65294e+08	9.89619e+07	1.72511e+06	4.27125e+08	1.22961e+08	2.31901e+08	1.65585e+08	212368332	3.78419e+07	5.5681e+07	1.22673e+08	1.64172e+07	4.94829e+07	322091237	1.82994e+08	1.24606e+07
O75487	Glypican-4;Secreted glypican-4	GPC4	0.00703044	0	0	193497	1.11474e+06	0	0	0	357076	86299.8	127572	535547	0	0	1.9898e+06	0	278417	0	549469	598857	0	0	0	294584	0	2.60757e+06	351362	0	0	0	969835	1.14648e+06	0	1.48687e+06	3.55581e+06	1.15118e+06	0	0	337674	248215	1.202e+06	0	602880	0	0	0	32602.7
O75503	Ceroid-lipofuscinosis neuronal protein 5	CLN5	0.0255578	521109	923623	0	0	0	160571	430959	378178	0	855553	493848	0	0	2.78977e+06	531109	356167	656688	0	996927	3.21485e+06	0	0	0	442440	481250	0	0	1.75522e+06	0	165966	438152	56428.8	1.02455e+06	0	1.3645e+06	0	0	0	291267	431112	0	489874	619731	422943	0	0
O75521	Enoyl-CoA delta isomerase 2, mitochondrial	ECI2	4.55e-08	2.2547e+08	4.09831e+08	2.04197e+08	2.62258e+08	478251614	6.58087e+08	268912612	3.76766e+08	3.60494e+08	2.85624e+08	2.2199e+08	4.0433e+08	4.54912e+08	2.45814e+08	356033295	4.6518e+08	1.7199e+08	4.06906e+08	2.43248e+08	1.61508e+08	2.03594e+08	2.4594e+08	2.69526e+08	2.19429e+08	3.74723e+08	2.17383e+08	2.68168e+08	3.98846e+08	288807119	2.47568e+08	3.40791e+08	2.44847e+08	1.32818e+08	2.69342e+08	2.54754e+08	2.48602e+08	4.3242e+08	2.583e+08	2.00297e+08	3.43541e+08	4.16253e+08	1.94874e+08	2.04302e+08	4.20428e+08	2.61857e+08	2.35133e+08
O75563	Src kinase-associated phosphoprotein 2	SKAP2	4.91e-09	0	507747	268891	613348	0	0	152669	0	794829	479027	0	0	0	920918	0	473689	0	0	105702	732375	0	254004	0	125450	0	0	426202	0	0	291623	553414	148602	953245	508691	1.07494e+06	273475	0	844687	672748	0	0	0	0	0	313208	0
O75607	Nucleoplasmin-3	NPM3	0.00248892	1.57586e+06	1.28681e+06	1.93306e+06	0	1.0403e+06	0	386178	672450	0	0	4.82174e+06	0	0	455602	315672	1.32254e+06	414263	1.20661e+06	0	267294	0	0	0	2.19145e+06	0	1.83983e+06	0	0	753636	1.69054e+06	222158	0	666983	0	818682	0	0	0	1.39848e+07	2.39718e+06	2.27855e+06	3.1593e+06	6.17292e+06	0	262217	1.73839e+06
O75676	Ribosomal protein S6 kinase alpha-4	RPS6KA4	0.000197433	0	0	0	0	0	0	136758	0	0	0	0	0	0	0	0	0	0	0	0	135324	0	0	0	82713.2	64378	0	0	0	0	0	0	47684.3	0	378197	0	0	0	174366	534665	151356	141113	0	108205	0	0	92147.3
O75746	Calcium-binding mitochondrial carrier protein Aralar1	SLC25A12	0.146773	0	0	0	144182	0	0	0	0	409909	0	910286	128052	244992	0	0	0	40557.9	0	0	0	0	0	0	0	0	0	0	0	0	240251	259040	0	304681	0	293113	0	0	0	0	0	0	0	0	0	5.20139e+06	0
O75764	Transcription elongation factor A protein 3	TCEA3	0.000160802	1.62529e+06	3.39242e+06	2.63323e+06	498383	3.76533e+06	6.57169e+06	8.30509e+06	1.08788e+06	2.46867e+06	1.53227e+06	2.08554e+06	5.09071e+06	3.51644e+06	4.08378e+06	3.42933e+06	2.46144e+06	3.29679e+06	3.32456e+06	1.59547e+06	1.67766e+06	2.25862e+06	3.68168e+06	3.83434e+06	2.77406e+06	1.62215e+06	2.2257e+06	1.06754e+06	750233	4.68118e+06	809778	1.25918e+06	780122	1.82086e+06	3.2168e+06	1.23175e+06	0	1.31103e+07	2.62635e+06	3.53366e+06	5.32906e+06	1.83994e+07	1.21151e+07	2.06947e+06	3.56725e+06	5.46298e+06	1.09549e+06
O75781	Paralemmin-1	PALM	0.0244657	0	198863	668440	2.34972e+06	0	512851	162250	0	416400	0	0	0	0	711291	0	123622	0	0	127376	6.71227e+06	595813	0	0	0	0	373001	0	326797	278922	206511	263095	0	0	0	623106	0	0	933489	0	415161	0	0	0	2.70199e+06	0	1.525e+06
O75792	Ribonuclease H2 subunit A	RNASEH2A	2.63e-06	114952	177930	0	0	0	0	0	0	0	0	0	323669	0	0	0	0	0	0	0	0	0	220261	0	0	0	267079	0	0	0	0	426490	0	0	152102	147338	0	141906	1.25733e+06	723059	622405	0	567881	0	131109	0	205406
O75795	UDP-glucuronosyltransferase 2B17	UGT2B17	2.02e-06	1.43773e+08	1.09801e+08	1.54278e+08	2.91134e+08	2.08842e+08	2.10121e+08	2.74169e+08	1.88292e+08	5.94879e+07	114554549	1.27644e+08	6.55616e+08	1.98185e+08	7.50866e+07	1.2468e+08	1.28642e+08	1.44474e+08	1.11115e+08	3.88367e+08	4.33383e+08	1.33056e+08	1.59567e+08	2.15247e+08	9.51275e+07	2.59876e+08	1.33544e+08	4.59896e+08	3.12824e+08	181971071	2.25587e+07	2.10593e+08	2.24903e+08	8.93764e+07	2.2297e+08	1.96198e+08	1.64574e+08	6.80124e+07	5.87499e+07	2.69731e+07	4.88769e+08	1.31882e+08	3.0295e+07	2.27247e+08	1.39048e+08	2.08723e+08	2.65724e+07
O75891	Cytosolic 10-formyltetrahydrofolate dehydrogenase	ALDH1L1	9.6e-06	6.90461e+08	1.58044e+08	7.38913e+08	367975325	9.18472e+07	1249375584	201403034	5.49304e+08	3.36205e+08	6.45305e+07	2.16525e+07	9.47213e+08	3.10552e+08	1.01546e+08	579540975	3.69663e+08	265093235	1.63174e+08	3.44481e+08	4.7811e+08	4.31925e+08	1.34171e+08	4.20846e+08	6.40334e+08	9.37595e+08	3.43567e+08	2.0871e+07	2.88078e+08	632008367	1.7291e+08	4.14721e+08	3.88712e+08	2.7254e+07	5.25784e+08	9.15033e+07	7.5649e+07	3.98439e+07	8.30806e+07	9.57268e+07	7.07479e+07	1.94983e+07	2.43313e+07	1.95889e+08	3.00518e+08	8.92532e+07	2.96688e+07
O75909	Cyclin-K	CCNK	3.06e-06	454017	588790	409808	351422	421197	300168	337603	0	894883	709849	0	1.08782e+06	1.44524e+06	604957	330020	183670	375580	553727	0	331296	806931	158094	1.01867e+06	781641	1.0613e+06	484458	455612	204793	229508	854166	520509	628633	0	364603	1.13544e+06	348517	1.43261e+06	1.51867e+06	1.49715e+06	2.60697e+06	1.16696e+06	743854	198471	462295	2.42518e+06	2.65203e+06
O75934	Pre-mRNA-splicing factor SPF27	BCAS2	0.000320968	715518	1.6206e+06	0	1.72636e+06	0	6.00368e+06	911460	0	247170	5.24491e+06	5.42214e+06	3.34314e+06	473234	2.99069e+06	791416	3.06039e+06	2.07584e+06	6.92649e+06	239947	2.53158e+06	901533	0	0	543679	5.62889e+06	2.0741e+06	789337	766038	0	1.25552e+06	4.81476e+06	745008	1.44597e+06	527107	3.46263e+06	1.4036e+06	5.35724e+06	5.59517e+06	5.66983e+06	5.98047e+06	1.13724e+07	1.44665e+06	3.09919e+06	1.56264e+06	1.67468e+07	577662
O75936	Gamma-butyrobetaine dioxygenase	BBOX1	0.000229572	0	3.47136e+07	2.25787e+06	1.27834e+07	346604	95009.5	4.4239e+06	6.25259e+06	1.68488e+07	114746	2.36417e+07	6.3363e+06	2.63949e+07	658573	7.00092e+06	4.83402e+06	4.76395e+07	2.18463e+07	1.94462e+07	82939816	2.65081e+07	730938	1.61359e+06	123861	0	114780	1.19249e+07	6.48588e+06	3.1704e+06	1.72735e+06	1.81046e+07	689348	0	210082	0	0	3.63305e+06	0	0	604409	0	0	1.00027e+06	0	0	0
O75970	Multiple PDZ domain protein	MPDZ	0.000142475	1.72891e+06	3.59709e+06	934454	957202	417088	803488	1.29423e+06	1.69098e+06	343815	95476	2.23004e+06	694099	1.21246e+06	56620	951399	518526	1.92706e+06	1.13324e+06	603053	584819	667469	42411	1.05265e+06	571860	715535	508000	355155	676005	698175	72528.6	521804	1.1185e+06	27507.5	1.74256e+06	40177.9	121390	295409	69872.6	401729	564210	0	1.42109e+06	19044.6	709411	895400	882947
O75995	SAM and SH3 domain-containing protein 3	SASH3	1.78e-11	0	1.98379e+06	908847	364809	0	124689	0	751321	773560	343970	1.07787e+06	0	637035	1.48706e+06	0	0	1.23779e+06	0	868651	1.55547e+06	450844	0	450110	0	1.5061e+06	0	539426	0	0	2.05192e+06	2.37957e+06	1.00001e+06	2.06511e+06	1.24439e+06	2.98792e+06	994711	0	535190	2.40518e+06	1.05562e+06	0	0	0	0	1.27731e+06	0
O76021	Ribosomal L1 domain-containing protein 1	RSL1D1	0.00218897	252112	439813	621313	902020	3.4757e+06	2.48788e+06	1.7429e+06	719091	4.85593e+06	1.57167e+06	3.69203e+06	3.01884e+06	5.35971e+06	2.35793e+06	229312	3.06434e+06	1.20968e+06	3.44843e+06	355284	4.19686e+06	624319	433822	6.59553e+06	1.26578e+06	5.68427e+06	123514	5.12531e+06	610433	0	374430	2.12186e+07	478983	0	1.5797e+06	1.12881e+06	989899	3.53522e+06	1.02911e+07	7.09421e+06	3.85921e+06	7.91531e+06	4.94898e+06	6.30609e+06	2.88431e+06	2.48679e+06	483268
O76054	SEC14-like protein 2	SEC14L2	1.33e-08	3.82613e+08	2.27687e+08	1.74212e+08	1.5831e+08	9.59029e+07	2.02137e+08	2.34679e+08	1.82951e+08	2.82196e+08	5.43264e+07	1.05361e+08	1.81625e+08	2.95211e+08	1.29344e+08	2.29777e+08	6.77127e+07	194724473	1.64157e+08	282512069	1.2915e+08	1.7049e+08	1.426e+08	7.09473e+07	2.64649e+08	1.07237e+08	1.29344e+08	2.05906e+08	7.79914e+07	3.23707e+08	1.72318e+08	7.62543e+07	7.24774e+07	4.59837e+07	2.34038e+08	4.28446e+07	9.67012e+07	4.18956e+08	5.51992e+07	9.55924e+06	1.09211e+08	1.63516e+08	45346797	1.20534e+08	407120726	2.33143e+08	1.5838e+07
O94804	Serine/threonine-protein kinase 10	STK10	6.01e-08	496047	1.69065e+06	427874	347496	109861	1.08868e+06	371016	755272	994373	1.06346e+06	252006	28363.8	842298	2.34001e+06	171664	42509.1	1.27513e+06	750281	1.06727e+06	595561	130830	0	356739	1.17769e+06	819892	251802	999168	336685	0	715972	2.05581e+06	875963	1.05675e+06	824282	1.55507e+06	592027	0	672673	300203	310978	228086	167656	197682	0	7.10864e+06	233518
O94888	UBX domain-containing protein 7	UBXN7	1.18e-06	1.90544e+06	916812	580792	1.56454e+06	166914	651043	383902	50721.8	931418	819395	243236	2.21471e+06	150985	2.74008e+06	0	1.2312e+06	1.28962e+06	1.08249e+06	214369	715238	2.83728e+06	2.90213e+06	594992	78828.3	496205	2.98125e+06	0	163817	0	858655	451160	1.37722e+06	981760	1.1348e+06	2.04339e+06	0	3.7763e+06	4.27833e+06	1.19375e+06	1.42815e+06	6.80666e+06	4.66629e+06	126658	112040	2.95349e+06	2.53019e+06
O94911	ATP-binding cassette sub-family A member 8	ABCA8	3.92e-05	97405.8	4.81707e+06	726554	2.17521e+06	9.48834e+06	324966	4.39834e+06	261036	482319	596694	35446.8	1.63544e+06	1.83757e+06	1.24104e+06	920888	485458	1.32901e+06	733857	840335	0	1.47317e+06	0	2.3929e+06	53363.8	270457	1.22371e+06	238766	2.088e+06	2.52633e+06	418941	814936	0	1.14026e+06	1.345e+06	769827	1.71242e+06	855721	2.01591e+06	431321	1.08738e+06	0	140321	1.32944e+06	0	675487	211150
O94919	Endonuclease domain-containing 1 protein	ENDOD1	1.37e-05	711754	235947	2.13012e+06	4.171e+06	363005	0	519790	167789	1.1865e+06	0	565058	0	1.48485e+06	2.80513e+06	0	434270	0	918878	610818	264680	0	0	4.96296e+06	358075	3.16003e+06	0	414559	355100	390310	3.09798e+06	3.18617e+06	0	378485	2.35841e+06	3.3384e+06	464202	81054.4	2.54548e+06	191133	99878.7	293916	228002	360448	0	1.61872e+06	0
O94925	Glutaminase kidney isoform, mitochondrial	GLS	0.0104086	1.92148e+06	2.09254e+06	527943	2.8023e+06	2.57211e+06	555170	1.96054e+06	0	2.7854e+06	795628	3.10411e+06	6.63623e+06	0	1.692e+06	1.23546e+06	3.54718e+06	6.54252e+06	3.34398e+06	212494	2.77857e+07	7.57695e+06	3.23309e+06	964308	352336	1.32219e+06	1.09987e+06	3.56396e+06	1.06744e+07	0	8.28892e+06	1.92381e+06	3.66998e+06	1.00345e+07	324824	1.5645e+07	5.46024e+06	0	8.21932e+06	2.1139e+06	708565	4.12465e+06	4.43645e+06	729398	921034	4.52229e+06	1.32394e+06
O94956	Solute carrier organic anion transporter family member 2B1	SLCO2B1	5.11e-05	954309	6.23424e+06	3.04536e+06	7.64396e+06	5.26565e+06	646264	4.2373e+06	1.3102e+07	1.55472e+07	4.34489e+06	5.19834e+06	6.23601e+06	1.22819e+07	7.94756e+06	8.41442e+06	5.86316e+06	1.61432e+07	4.71799e+06	1.34447e+07	840116	5.50196e+06	4.82185e+06	6.87292e+06	8.80013e+06	2.30217e+06	3.06885e+06	1.36647e+07	4.13026e+06	2.76718e+06	1.70796e+06	2.90211e+06	1.4622e+06	452471	1.13375e+07	5.625e+06	5.48717e+06	0	713507	2.1484e+06	806366	477931	563831	377400	5.98578e+06	3.16171e+06	2.23204e+06
O95049	Tight junction protein ZO-3	TJP3	0.0106505	0	511880	0	87398.8	180537	56303.5	98288.4	1.42798e+06	373385	98447.2	1.78119e+06	220527	0	838116	115029	257633	2.16894e+06	668936	155852	54583.7	145138	0	57711.1	0	912052	582865	661998	0	0	0	0	556820	0	446448	398106	0	0	416947	186249	628477	161497	2.5788e+06	0	0	40509.3	1.09429e+06
O95071	E3 ubiquitin-protein ligase UBR5	UBR5	0.000210452	25895.7	30544.1	15710.3	7435.02	85002	61155.7	31772.3	11191.9	13952.3	106120	179510	26856.4	32118.3	139508	22357.7	0	286117	3846.67	19206.7	6288.71	13351.7	79708.9	73513.6	18977.3	122753	95886.2	51292.2	60454.3	362748	0	323145	88600.8	5308	0	56700.3	33313.6	186751	624113	327871	586957	212131	0	0	11001.8	58495.4	148647
O95154	Aflatoxin B1 aldehyde reductase member 3	AKR7A3	2.86e-10	282302036	204354607	2.50464e+08	3.996e+08	539249641	215564594	2.22579e+08	5.03026e+08	4.31996e+08	1.50314e+08	2.84624e+08	2.70888e+08	1.98972e+08	1.51404e+08	2.89039e+08	2.96075e+08	346883166	4.72834e+08	3.29711e+08	7.56727e+08	191084566	1.08959e+08	1.54376e+08	3.4523e+08	3.0124e+08	1.06136e+08	3.71919e+08	1.11975e+08	475682418	6.09028e+07	2.78227e+08	1.27361e+08	3.98069e+08	5.6412e+08	6.65659e+08	5.49368e+06	2.24528e+08	6.35581e+07	3.852e+07	1.34553e+08	2.60135e+08	6.42142e+07	1.03495e+07	1.11412e+08	4.85142e+08	9.90325e+06
O95210	Starch-binding domain-containing protein 1	STBD1	8.64e-07	5.59912e+07	3.1638e+07	2.13775e+07	4.37512e+07	5.60662e+07	5.73588e+07	2.89758e+07	1.01063e+08	1.77588e+07	3.48023e+07	1.73669e+07	4.2079e+07	3.58957e+07	2.54389e+07	24307138	2.50735e+07	5.33357e+07	8.32286e+07	3.31752e+07	3.65001e+07	6.1273e+07	1.77858e+07	6.1607e+07	52766528	2.95254e+07	3.15314e+07	6.80994e+07	6.3663e+07	4.29237e+07	5.95542e+06	4.3081e+07	8.41964e+07	6.76543e+07	8.1931e+07	4.59558e+07	5.82606e+06	2.9475e+07	1.12691e+07	2.93956e+06	1.6634e+07	1.67612e+07	4.13366e+06	1.97492e+07	1.361e+07	1.15501e+07	3.3914e+07
O95255	Multidrug resistance-associated protein 6	ABCC6	5.69e-05	1.31497e+06	4.4528e+06	2.19159e+06	5.58755e+06	1.29086e+07	2.48224e+06	9.02338e+06	6.34086e+06	2.63369e+06	239107	4.39671e+06	7.09601e+06	9.53727e+06	3.09551e+06	5.60739e+06	3.46886e+06	7.24385e+06	1.54908e+06	6.22832e+06	3.7945e+06	8.95345e+06	808073	5.35614e+06	3.54224e+06	5.4285e+06	2.44758e+06	1.92886e+07	2.32703e+06	2.92303e+06	3.52757e+06	6.72832e+06	5.3724e+06	1.91591e+06	6.51399e+06	3.44769e+06	4.02058e+06	3.89394e+06	5.17807e+06	667414	2.81994e+06	2.40702e+06	1.64857e+06	720579	3.0474e+06	5.43355e+06	3.09979e+06
O95297	Myelin protein zero-like protein 1	MPZL1	1.15e-05	0	622351	2.63046e+06	686866	0	1.64443e+06	0	693659	1.21213e+06	1.51337e+06	153844	857567	379375	3.38599e+06	0	491225	352352	500311	1.34745e+06	596373	397147	389548	0	348886	1.63063e+06	1.52919e+06	0	1.09557e+06	0	481201	594358	2.66588e+06	3.59837e+06	0	2.62895e+06	683251	433153	0	2.911e+06	848311	956025	6.09445e+06	4.01259e+06	1.30009e+06	870661	598971
O95302	Peptidyl-prolyl cis-trans isomerase FKBP9	FKBP9	2.85e-08	572110	4.13016e+06	0	0	0	989311	0	179354	0	1.01202e+06	2.0021e+06	0	0	1.50751e+06	0	635660	0	3.66026e+06	361392	215972	329667	791657	0	231804	1.59857e+06	750456	0	2.14115e+06	0	2.96565e+06	1.55723e+06	683449	68361.1	0	323490	1.67287e+06	1.02663e+06	2.7431e+06	159746	776764	446081	4.22427e+06	5.64356e+06	0	1.70225e+06	642313
O95319	CUGBP Elav-like family member 2	CELF2	3.01e-07	0	0	0	746309	0	0	0	0	158805	0	341228	0	0	413454	0	0	0	0	174776	157965	111584	0	0	0	0	0	0	0	0	369445	411882	0	0	0	206976	250651	0	0	0	0	0	0	0	0	124710	0
O95342	Bile salt export pump	ABCB11	0.00272275	923696	4.86476e+06	1.20622e+07	3.84358e+06	9.96257e+06	3.44394e+06	4.65409e+06	9.67204e+06	1.71925e+06	1.61484e+06	1.40469e+06	1.09782e+07	1.02919e+07	3.92128e+06	4.15839e+06	1.128e+07	6.82605e+06	2.57166e+06	6.85824e+06	1.3117e+07	3.57775e+06	5.53807e+06	4.21452e+06	7.07402e+06	1.18514e+07	2.15725e+07	6.11902e+06	4.17548e+06	8.86736e+06	587131	3.91798e+06	3.71056e+06	1.00901e+07	4.59181e+06	1.46005e+06	1.41208e+06	5.20012e+06	1.32483e+06	2.45585e+06	1.98151e+06	390406	962854	859066	1.13373e+07	5.80821e+06	2.22734e+06
O95347	Structural maintenance of chromosomes protein 2	SMC2	0.00351972	0	0	0	0	49741.4	0	63799.1	0	177112	0	2.5176e+06	122220	124212	0	0	404812	0	0	0	0	0	154055	218245	0	0	0	0	29904	0	0	0	49255.8	0	0	0	110935	366832	782831	0	605902	2.13635e+06	1.26123e+06	19820.4	452897	1.25405e+06	285429
O95379	Tumor necrosis factor alpha-induced protein 8	TNFAIP8	7.94e-09	273897	3.9295e+06	2.62146e+06	4.6909e+06	321093	0	0	999951	592566	2.30192e+06	3.03168e+06	686326	0	4.40496e+06	0	1.62643e+06	1.44123e+06	1.82028e+06	2.30308e+06	4.20173e+06	0	0	0	0	2.1602e+06	1.32153e+06	0	2.82665e+06	0	2.26073e+06	3.26841e+06	4.32077e+06	0	0	714852	686819	0	2.19517e+06	3.70048e+06	0	0	0	0	0	537863	0
O95400	CD2 antigen cytoplasmic tail-binding protein 2	CD2BP2	5.25e-05	529405	2.2602e+06	1.52628e+06	1.0294e+06	1.39835e+06	412573	0	0	1.94587e+06	1.4213e+06	4.05625e+06	1.98166e+06	2.52755e+06	2.24948e+06	628147	472390	475221	823578	285857	1.85103e+06	39851.4	2.95913e+06	2.10819e+06	0	1.82788e+06	1.54402e+06	1.75513e+06	853245	0	521268	1.13545e+06	494780	0	51651.2	1.69328e+06	1.28353e+06	6.84419e+06	3.17201e+06	2.75739e+06	4.97067e+06	5.44043e+06	711348	1.00825e+06	1.36341e+06	3.74942e+06	2.82853e+06
O95466	Formin-like protein 1	FMNL1	7.98e-09	63456.1	275717	587544	76077.5	540918	0	280156	737399	173780	48386.9	1.19573e+06	0	0	556658	0	190604	142547	0	489394	1410194	348700	1.32065e+06	0	0	946806	0	461082	0	0	412242	969994	545278	808974	491287	2.06833e+06	530131	0	40575.6	296479	45947.3	0	0	0	179563	553571	0
O95498	Vascular non-inflammatory molecule 2	VNN2	0.0309599	0	0	0	0	0	0	0	0	0	0	0	0	0	1.39583e+06	0	0	0	0	0	3.4758e+06	473134	0	0	0	0	6.33484e+06	0	0	0	0	0	8.67633e+06	0	0	2.58837e+06	0	0	0	1.42014e+07	1.36642e+06	0	2.72905e+06	0	0	0	4.21531e+06
O95544	NAD kinase	NADK	0.00010754	299146	0	448308	324976	473777	1.48478e+06	324604	783842	586617	580684	505521	1.01451e+06	274860	684659	444121	272703	959710	0	0	1.13609e+06	314940	650441	1.0692e+06	324756	1.02191e+06	167370	294820	348637	0	298273	423241	0	1.4804e+06	357552	1.04662e+06	947949	0	179308	1.1426e+06	173992	311083	1.41055e+06	151247	145812	925015	718594
O95602	DNA-directed RNA polymerase I subunit RPA1	POLR1A	0.0120199	54219.5	0	0	182426	0	190336	0	473339	0	140731	122723	41564	0	0	58979.2	9002.49	0	0	0	83335.1	20510.5	0	88695.8	0	562298	0	110791	210832	0	0	195910	175629	0	0	0	134467	337241	95449.3	508526	25841.4	16845.9	765850	129382	313853	17976.5	107447
O95718	Steroid hormone receptor ERR2	ESRRB	4.49e-05	7.50737e+06	1.05453e+07	2.19902e+06	2.5538e+06	5.68815e+06	5.19976e+06	0	3.8501e+06	1.82307e+07	9.92731e+06	5.00305e+06	2.78012e+06	4.79452e+06	841880	2.24462e+07	9.16736e+06	3.36529e+06	1.77368e+07	2.71406e+06	4.42036e+06	6.50241e+06	3.75254e+06	1.49715e+07	4.2199e+06	1.91744e+06	1.32199e+07	2.40552e+06	1.85007e+07	4.41865e+06	4.7523e+06	3.78616e+06	4.56318e+06	1.23448e+06	5.15285e+06	1.36934e+06	2.37585e+06	422431	8.61491e+06	0	3.13436e+07	2.23807e+07	1.97025e+06	1.15534e+06	5.59973e+06	4.66389e+06	4.08879e+06
O95817	BAG family molecular chaperone regulator 3	BAG3	0.0218758	7.91542e+06	591780	2.85576e+06	760624	1.45074e+07	4.57631e+06	240017	424980	304566	888964	1.2622e+06	2.07532e+06	565551	1.98564e+06	37363	1.05518e+06	112493	999486	482509	5.4904e+06	365159	992983	1.62237e+06	404367	1.50441e+06	1.54209e+06	1.17597e+06	1.03089e+06	74768.4	2.98417e+06	3.74854e+06	516141	2.36304e+06	81484	770751	207136	230628	730995	1.5996e+06	2.02625e+06	946262	723125	1.66669e+06	1.29246e+06	338013	1.40634e+06
O95822	Malonyl-CoA decarboxylase, mitochondrial	MLYCD	1.83e-06	3.61946e+06	2.08656e+07	2.34767e+07	2.81943e+07	1.0795e+07	1.0846e+07	1.46918e+07	3.73957e+07	1.22799e+07	6.33465e+06	3.58076e+07	2.99773e+07	3.97649e+07	7.29597e+06	2.39191e+07	1.42834e+07	1.60017e+07	2.05991e+07	1.39322e+07	2.11419e+07	8.15902e+06	2.85225e+06	3.54078e+07	2.4697e+07	1.23726e+07	6.67714e+06	6.78856e+06	2.01042e+07	1.5797e+07	7.10964e+06	1.98518e+07	1.06004e+07	5.67128e+06	2.21873e+07	7.57723e+06	1.36357e+07	7.2178e+06	3.7919e+06	5.21891e+06	4.30221e+06	5.72391e+06	1.18413e+07	1.4143e+07	5.4239e+06	3.21639e+07	6.05998e+06
O95832	Claudin-1	CLDN1	0.0960074	0	0	0	0	0	0	0	0	123653	542859	0	0	0	0	0	2.39081e+06	0	0	173373	0	0	0	0	0	0	405215	80240.1	0	0	0	0	492658	0	0	0	0	0	230914	3.51222e+06	190955	0	0	690134	324964	0	3.08693e+06
O96013	Serine/threonine-protein kinase PAK 4	PAK4	0.000196044	408233	0	117639	234167	331122	287974	0	205157	209821	0	402443	470110	0	722470	204128	102760	0	442609	0	0	151041	1.12832e+06	0	0	168955	461236	0	0	0	80159.8	278383	0	0	0	367904	0	317189	304902	887303	0	1.07593e+06	1.08362e+06	2.37978e+06	1.16949e+06	871702	1.46449e+06
P00325	Alcohol dehydrogenase 1B	ADH1B	2.48e-06	1619381966	9.58242e+08	2112098933	2729342075	3.59833e+08	3.51675e+08	1369996665	2609433086	8.1249e+08	7.89786e+08	6.18799e+08	6206452992	2401965087	1346010451	1631601401	4.58685e+08	1690680856	5.82419e+08	3737941191	2644613679	2753734318	6.56875e+08	2050251015	2412392895	4078261923	4.87787e+08	1160953746	6.44876e+08	5385672808	299678768	1806161013	5.52998e+08	1092030367	3858784908	1211684981	6.02738e+08	3.25112e+08	9.29529e+08	3.33571e+08	6.96477e+08	4.7454e+08	3.8281e+08	1111720516	9.86813e+08	1773487321	1064455559
P00439	Phenylalanine-4-hydroxylase	PAH	0.000462107	8.23547e+07	5.37633e+07	9.1286e+07	136595735	2.96085e+07	7.62289e+07	1.12293e+08	7.51329e+07	2.84781e+07	6.53726e+07	1.39083e+07	1.47921e+08	9.78892e+07	8.28776e+07	1.76597e+08	1.57418e+08	7.41944e+07	7.83021e+06	9.53202e+07	9.26572e+06	1.36086e+07	0	1.17696e+08	145557382	7.26737e+07	5.21216e+08	3.84301e+07	2.7498e+07	1.86369e+08	1.02434e+07	2.9792e+07	3.18644e+07	0	1.40719e+08	3.88926e+07	6.11908e+07	1.35389e+07	2.60486e+07	5.10535e+07	6.21451e+07	4.31935e+07	6.86405e+06	2.4107e+07	156943143	9.56018e+07	2.58427e+07
P00480	Ornithine carbamoyltransferase, mitochondrial	OTC	0.000537415	1.19817e+08	2.48533e+08	3.80512e+08	3.50162e+08	2.89992e+08	3.33161e+07	3.22103e+08	9.13852e+08	2.02442e+08	4.90894e+08	1290946393	3.72486e+07	8.28467e+08	263949937	626384739	1.91889e+08	3.3124e+08	2.44196e+08	4.23137e+08	8.89962e+08	1.43725e+08	4.40015e+08	5.15855e+08	4.08635e+08	6.83454e+08	7.80987e+08	7.64858e+08	6.19633e+08	4.10744e+08	3.4099e+08	5.44755e+08	3.45004e+08	1.96956e+08	7.79265e+08	1.32059e+08	0	2.83062e+08	6.21632e+08	6.47617e+07	5.67845e+08	157605064	3.21681e+08	2.10869e+08	2.67736e+08	3.95407e+08	4.53508e+07
P00488	Coagulation factor XIII A chain	F13A1	0.0171398	6.91428e+06	1.81098e+06	7.64878e+06	2.30201e+07	4.54952e+06	1.62581e+06	107435	1.88345e+06	1.44574e+06	1.62114e+07	1.2458e+07	480784	0	6.77455e+07	0	1.46135e+07	39225.9	3.5394e+06	1.89328e+06	4.81291e+06	4.96565e+06	6.24412e+06	2.9097e+06	4.34913e+06	3.5465e+07	1.30614e+06	4.77261e+06	0	383171	1.20202e+07	2.75816e+07	4.01637e+06	3.46234e+06	5.81702e+06	2.37769e+07	622447	0	6.28722e+06	4.47849e+07	283046	0	899212	1.20987e+07	0	1.89373e+06	4.61515e+06
P00746	Complement factor D	CFD	3.63e-05	0	0	3.00378e+06	0	0	2.6891e+06	522339	0	0	306963	1.00971e+06	0	3.00132e+06	260206	0	299564	0	0	235394	0	0	0	889264	239927	2.12952e+06	129060	1.20971e+06	0	0	3.08367e+06	5.04717e+06	273881	3.2887e+06	0	1.79641e+06	0	276282	0	0	0	718854	0	559545	406039	1.28021e+06	1.59513e+06
P00813	Adenosine deaminase	ADA	0.000768593	194307	1.60913e+06	2.34529e+06	869416	481027	3.46275e+06	0	203995	1.57873e+06	2.83102e+06	3.24604e+06	883785	0	2.77273e+06	490124	2.17292e+06	520069	1.07383e+06	794837	2.25294e+06	194702	512865	675912	84368.9	891663	938586	0	1.51279e+06	0	498564	1.09526e+06	919397	3.64296e+06	413791	510627	5.24849e+06	206429	823340	1.89529e+06	0	1.28613e+06	1.25184e+06	1.46662e+06	0	2.25463e+06	0
P00966	Argininosuccinate synthase	ASS1	0.000349425	3.49859e+08	2220021786	8.82586e+08	1585375293	1399357435	3.70073e+08	3855234594	3.93763e+08	555182690	1508497638	7.27534e+08	1.94724e+08	6.49185e+08	4.21235e+08	1847716994	6.33524e+08	779937874	1.56622e+08	8.9838e+08	3.38741e+08	3.8413e+08	5.21085e+08	964846956	4.31953e+08	2.83905e+08	2323791244	6.07702e+08	4.91465e+08	1549488935	1049736718	5.48752e+08	3.26505e+08	4.38248e+08	1306246889	5.2619e+08	1927171428	5.35497e+08	2.37744e+08	4.22032e+08	9.48321e+08	4.36371e+08	8.78956e+08	2.00578e+08	3.34382e+08	1512402659	152551610
P01033	Metalloproteinase inhibitor 1	TIMP1	6.41e-10	359459	0	2.73487e+06	0	0	0	0	2.35502e+06	0	1.49349e+06	8.34419e+06	446418	0	1.22247e+07	0	1.17192e+06	0	1.90644e+06	221968	0	0	1.3882e+06	0	0	1.56572e+07	0	5.18566e+06	2.98734e+06	0	9.46526e+06	1.37351e+07	3.45251e+06	1.55975e+07	350893	6.55886e+06	0	2.45674e+06	1.20382e+06	2.01719e+06	0	0	0	0	0	0	0
P01137	Transforming growth factor beta-1;Latency-associated peptide	TGFB1	0.0600986	187911	0	0	0	0	0	0	0	0	0	0	0	0	0	0	150840	121534	194975	111343	903572	0	0	0	0	149436	0	0	0	0	305101	172403	0	0	0	213801	0	0	0	181506	7.53568e+06	0	0	0	0	3.19494e+06	251434
P01591	Immunoglobulin J chain	IGJ	0.000270507	1.56905e+07	1.00053e+07	3.14931e+06	2.5058e+07	6.41328e+06	1.35199e+07	6.18964e+06	1.41647e+07	6.95191e+06	2.01307e+07	4.5723e+06	5.58559e+06	7.92898e+06	1.45979e+07	2.6288e+06	1.12352e+07	3.98346e+06	9.30054e+06	7.20277e+06	2.16063e+06	1.41178e+07	7.2374e+06	1.00211e+06	1.2135e+07	6.58357e+06	3.933e+06	1.45751e+07	4.49894e+06	3.07674e+06	3.02752e+07	2.631e+07	7.98964e+06	1.85728e+06	4.65406e+06	1.12353e+07	5.10658e+06	2.86188e+06	3.77601e+07	5.89373e+06	2.28186e+06	7.04637e+06	1.83623e+06	2.61187e+07	346753	935361	2.32842e+06
P01596	Ig kappa chain V-I region CAR	0	3.22e-05	1.42777e+07	1.02496e+07	1.75706e+07	1.98338e+07	4.95612e+06	7.46943e+07	1.03071e+07	9.27579e+06	2.27281e+07	2.64358e+07	8.78213e+06	7.87094e+06	1.39475e+07	1.17848e+07	4.39083e+06	6.23209e+07	1.34281e+07	2.04425e+07	1.1373e+07	5.16518e+06	6.73449e+07	1.77612e+07	5.36239e+06	5.29914e+07	2.58024e+07	0	1.21229e+07	1.48201e+07	1.09166e+07	1.102e+08	9.92453e+06	2.03169e+07	5.16402e+07	2.12573e+07	3.59535e+07	2.12036e+07	1.13476e+07	3.42028e+07	3.39299e+07	6.56097e+06	1.49125e+07	5.68732e+06	1.29805e+07	0	1.04533e+07	3.24793e+07
P01609	Ig kappa chain V-I region Scw	0	6.63e-06	2.1722e+07	1.61925e+07	3.35286e+07	2.4004e+07	2.09261e+07	9.68972e+07	1.90035e+07	2.13601e+07	3.85122e+07	3.1951e+07	1.2685e+07	1.08035e+07	44159458	1.88293e+07	9.26698e+06	1.16888e+08	2.2666e+07	6.49111e+07	1.81229e+07	1.19826e+07	1.56377e+07	2.64496e+07	5.66585e+06	9.46452e+07	3.17042e+07	3.84982e+07	2.43416e+07	2.12225e+07	2.92947e+07	2.00891e+08	2.07598e+07	3.54054e+07	5.29735e+07	2.90678e+07	5.61937e+07	3.07872e+07	3.02225e+07	4.8669e+07	3.89155e+07	1.27903e+07	3.83827e+07	1.42265e+07	1.42862e+07	1.01896e+07	2.47622e+07	4.07611e+07
P01611	Ig kappa chain V-I region Wes	0	2.45e-06	4.64104e+06	2.02413e+06	3.45253e+06	7.06505e+06	1.95188e+06	7.86472e+06	1.69038e+06	1.82962e+06	2.75154e+06	7.20168e+06	3.73478e+06	5.66255e+06	6.91694e+06	4.00951e+06	0	3.19282e+06	6.98997e+06	1.57452e+07	0	1.74297e+06	3.03393e+06	4.57797e+06	1.15999e+06	1.58923e+07	1.13606e+07	6.75354e+06	4.68324e+06	4.32762e+06	0	1.30429e+07	1.01635e+07	6.20044e+06	3.63871e+06	9.79115e+06	9.68848e+06	2.65737e+06	4.60292e+06	2.28404e+07	7.68042e+06	2.55889e+06	1.98757e+06	3.37656e+06	0	1.89534e+06	2.54526e+06	3.97315e+06
P01620	Ig kappa chain V-III region SIE	0	3.4e-05	8.48373e+07	5.24119e+07	1.18638e+08	4.3217e+07	1.50692e+07	1.89385e+08	2.65498e+07	5.50777e+07	6.33411e+07	8.01311e+07	3.4258e+07	3.35553e+07	2.57622e+07	9.17422e+07	3.78042e+07	1.26755e+08	5.27131e+07	1.13789e+08	2.7781e+07	3.3587e+07	3.52067e+07	3.428e+07	1.57721e+07	8.67456e+07	1.11216e+08	4.15844e+07	4.63016e+07	9.93543e+07	2.40943e+07	4.19715e+08	6.77706e+07	8.43469e+07	7.45799e+07	3.32077e+07	1.287e+08	5.25605e+07	4.13174e+07	1.58263e+08	8.3938e+07	2.02889e+07	3.81832e+07	1.37191e+07	6.95388e+07	2.23289e+07	9.45979e+07	5.14932e+07
P01767	Ig heavy chain V-III region BUT	0	0.0813699	0	1.28831e+06	1.48629e+06	2.04438e+06	0	705951	0	0	2.04612e+06	4.23348e+06	0	3.3667e+06	0	807704	0	2.10521e+06	0	2.74069e+06	0	1.37417e+06	0	0	0	1.39847e+06	6.97766e+06	0	0	0	0	2.34677e+06	671649	0	0	0	3.10854e+07	3.89837e+06	0	8.05743e+06	0	0	0	0	1.17221e+06	0	0	852307
P01772	Ig heavy chain V-III region KOL	0	0.00158005	0	4.52463e+06	0	0	0	1.38025e+06	0	0	0	5.87452e+06	0	1.98373e+06	0	3.27993e+06	734758	1.58243e+06	2.38279e+06	1.76874e+06	0	834878	0	0	0	0	2.21321e+06	3.38234e+06	0	1.67234e+06	0	9.33215e+06	792829	2.66878e+06	0	2.048e+06	6.09009e+06	889473	1.89398e+06	0	0	0	0	0	4.34047e+06	760245	0	1.85735e+06
P01903	HLA class II histocompatibility antigen, DR alpha chain	HLA-DRA	1.35e-09	4.97978e+07	1.15852e+08	7.91724e+07	7.39033e+07	5.08785e+07	6.04441e+07	6.03844e+07	5.13377e+07	1.26731e+08	8.76759e+07	9.82422e+07	3.14021e+07	4.3155e+07	3.78232e+07	1.43161e+07	5.00784e+07	1.16759e+08	3.67414e+07	6.83086e+07	1.44415e+08	2.13409e+07	2.95298e+07	5.49994e+07	2.15077e+07	6.36854e+07	2.73328e+07	4.82197e+07	1.00031e+07	2.677e+07	4.33276e+07	1.21716e+08	5.82953e+07	1.87028e+08	6.0856e+07	1.06606e+08	1.15547e+08	1.36163e+07	4.34575e+07	7.6534e+07	9.7841e+07	1.43819e+07	2.86752e+06	4.32752e+07	4.89701e+06	1.35315e+08	1.8714e+07
P01909	HLA class II histocompatibility antigen, DQ alpha 1 chain	HLA-DQA1	0.000264342	0	1.84841e+06	0	0	0	1.95764e+06	0	1.93343e+06	0	9.11331e+06	0	0	0	0	0	559013	0	0	2.79206e+06	2.83887e+06	0	0	684531	0	0	0	0	0	0	0	5.00685e+06	1.28925e+06	0	0	8.44297e+06	1.76219e+07	0	0	0	0	0	0	0	0	5.69639e+06	0
P01920	HLA class II histocompatibility antigen, DQ beta 1 chain	HLA-DQB1	1.56e-05	0	4.63869e+06	3.82508e+06	518465	162045	517018	2.1104e+06	775458	1.10266e+06	2.95138e+06	3.21143e+06	948387	0	1.15156e+06	333882	5.62825e+06	1.01818e+06	438356	2.29417e+06	1.2671e+07	0	308777	626100	235289	1.21655e+06	0	2.76219e+06	0	0	922676	4.8067e+06	1.83783e+06	5.3844e+06	469807	3.44036e+06	4.08018e+06	0	597395	844192	3.3177e+06	0	0	0	0	2.27557e+06	264691
P02452	Collagen alpha-1(I) chain	COL1A1	3.43e-06	1.4883e+06	131576	553060	1.70672e+06	0	324046	0	0	213376	0	978679	0	1.25266e+06	1.82298e+06	0	996036	0	734772	101258	0	61808	100836	0	0	2.2046e+06	0	160813	161330	87382.5	1.02248e+06	1.14392e+06	0	105278	1.57142e+06	1.63382e+06	0	0	0	60528.3	0	0	0	97254	0	974484	0
P02511	Alpha-crystallin B chain	CRYAB	0.705786	7.98623e+07	132673	0	2.84477e+07	1.03774e+06	1.62489e+07	2.59828e+06	0	575983	0	307774	0	0	0	4.73972e+06	2.45558e+06	0	3.55221e+06	3.69363e+06	9.48421e+07	1.26428e+06	2.95548e+06	0	0	5.3934e+06	1.3636e+06	0	635513	0	1.18498e+07	1.48543e+07	0	0	2.66985e+06	22285012	4.13557e+06	0	0	0	2.97641e+06	0	0	0	0	718524	0
P02656	Apolipoprotein C-III	APOC3	0.00345741	1.20183e+08	7.77069e+07	1.03129e+08	1.05469e+08	9.13895e+07	4.3194e+08	2.92803e+08	2.0042e+08	423691258	132973902	1.91059e+08	1.11151e+08	2.08621e+08	2.02516e+08	1.30652e+08	3.20509e+08	1.17071e+08	3.95067e+08	1.20874e+08	4.85127e+07	2.79133e+08	2.20132e+08	5.64363e+07	1.57239e+08	1.48534e+08	2.06377e+08	2.42174e+08	9.46495e+07	1.12047e+08	9.5833e+07	1.83511e+08	1.30545e+08	1.49386e+08	7.88795e+07	7.00248e+07	1.28365e+08	4.01206e+07	5.98104e+08	4.95931e+07	1.21211e+08	5.40943e+08	2.5141e+07	5.90334e+08	5.21409e+07	6.12976e+08	7.39196e+07
P02743	Serum amyloid P-component;Serum amyloid P-component(1-203)	APCS	0.0940857	3.21485e+06	6.41036e+06	4.05844e+07	1.20095e+08	6.84272e+06	4.61088e+07	3.7086e+06	5.13116e+06	9.62269e+06	3.16809e+07	5.39317e+06	4.03884e+06	2.76168e+06	3.96742e+07	2.4134e+06	2.88603e+06	4.75501e+06	1.5256e+07	2.81843e+06	3.25395e+06	3.70137e+06	3.33381e+06	1.12751e+07	3.06566e+06	1.90744e+07	7.35245e+06	9.80619e+06	6.51967e+06	2.23815e+06	6.51841e+06	4.00572e+06	1.2968e+07	9.24191e+07	3.6417e+06	2.19502e+07	1.01493e+07	381836	8.71486e+06	3.95657e+06	0	7.3678e+06	4.46513e+06	5.23976e+07	4.47539e+06	6.39241e+06	1.14024e+06
P02745	Complement C1q subcomponent subunit A	C1QA	1.62e-06	0	1.68211e+06	3.85768e+06	4.09535e+06	1.64625e+06	4.68346e+06	4.27846e+06	4.52463e+06	9.34339e+06	5.61612e+06	0	873947	2.04061e+06	4.99839e+06	0	3.20736e+06	4.37376e+06	3.07316e+06	1.17741e+07	3.6766e+06	466563	2.11747e+06	1.79068e+06	871999	5.14048e+06	1.0771e+06	2.27022e+06	2.47348e+06	1.36139e+06	8.35698e+06	3.23235e+06	1.39825e+06	484096	2.40554e+06	3.0209e+06	1.90328e+06	479167	1.81148e+07	2.53979e+06	1.19921e+06	1.51502e+06	0	0	913082	1.71504e+06	567970
P02746	Complement C1q subcomponent subunit B	C1QB	7.54e-07	5.7295e+06	11338464	1.28009e+07	2.17332e+07	2.22279e+06	4.4367e+06	2.25143e+06	9.11267e+06	1.44456e+07	1.42186e+07	4.54839e+06	799638	4.45746e+06	8.91347e+06	718949	7.83193e+06	7.79262e+06	6.96743e+06	2.2774e+07	1.45197e+06	3.23348e+06	2.42495e+06	1.1811e+07	3.57103e+06	7.95606e+06	3.57164e+06	5.67576e+06	720159	3.06044e+06	1.99797e+07	1.09595e+07	2.06968e+06	5.98356e+06	5.73517e+06	3.96224e+06	6.92866e+06	0	8.66688e+06	3.79768e+06	1.39099e+06	749276	0	2.87843e+07	862933	6.0723e+06	2.28571e+06
P02747	Complement C1q subcomponent subunit C	C1QC	9.38e-09	3.81096e+06	1.6588e+07	1.56793e+07	1.54702e+07	4.85551e+06	1.74211e+07	1.04296e+07	8.60188e+06	2.23113e+07	1.48053e+07	4.64199e+06	4.05295e+06	8.11978e+06	1.2354e+07	1.18956e+06	1.19174e+07	1.79492e+07	9.44613e+06	3.95425e+07	4.93299e+06	3.49927e+06	4.07337e+06	6.14197e+06	7.34213e+06	9.7813e+06	9.85575e+06	1.23442e+07	1.91157e+06	2.65719e+06	3.25591e+07	1.5258e+07	8.43907e+06	9.22215e+06	8.20629e+06	9.94888e+06	6.23695e+06	1.66556e+06	1.5561e+07	7.41973e+06	1.733e+06	4.14852e+06	915396	2.24697e+07	1.64271e+06	5.20701e+06	3.30776e+06
P02753	Retinol-binding protein 4;Plasma retinol-binding protein(1-182);Plasma retinol-binding protein(1-181);Plasma retinol-binding protein(1-179);Plasma retinol-binding protein(1-176)	RBP4	4.38e-05	1.70646e+08	2.31253e+08	1.70915e+08	7.59694e+07	1.09073e+08	1.96426e+08	1.74713e+08	2.1657e+08	6.03964e+07	2.48288e+08	1.9781e+08	4.46832e+08	4.81499e+08	1.04794e+08	1.75264e+08	7.06494e+08	248092426	9.39207e+07	1.88554e+08	1.62992e+08	7.52507e+07	1.51482e+08	2.88262e+08	1.33776e+08	3.26736e+08	8.96237e+07	5.27972e+07	2.05096e+08	4.79647e+08	1.70024e+08	4.0984e+08	1.58637e+08	1.46596e+08	8.07518e+07	2.84818e+08	2.20189e+08	4.24039e+08	8.44137e+07	181350900	9.17249e+07	3.29319e+08	3.29265e+08	2.22509e+08	2.42401e+08	2.79943e+08	6.81276e+07
P02786	Transferrin receptor protein 1;Transferrin receptor protein 1, serum form	TFRC	0.000778525	2.55785e+06	1.33805e+07	1.91976e+06	360326	8.57287e+06	7.98023e+06	7.53722e+06	2.78587e+06	3.22077e+06	1.14645e+07	1.24733e+07	6.62365e+06	3.6553e+06	6.78174e+06	2.07008e+06	2.03008e+06	1.6784e+06	3.35965e+06	197609	8.68122e+06	5.96571e+06	6.40447e+06	8.33964e+06	150769	5.57459e+06	4.40955e+06	2.42412e+06	6.88347e+06	2.44349e+06	9.39726e+06	1.35168e+07	9.67504e+06	1.88008e+06	2.97971e+06	2.6113e+06	1.75458e+07	6.29706e+06	7.70722e+06	2.74745e+07	1.60202e+07	3729144	6.40849e+07	712868	471196	7.50165e+06	4.79122e+06
P02794	Ferritin heavy chain;Ferritin heavy chain, N-terminally processed	FTH1	0.345719	6.04643e+07	4.80867e+07	2.27465e+07	192832585	9.50153e+06	2.15493e+07	2.00991e+07	729748	3.32321e+07	2.85385e+07	1.43288e+06	4.87845e+06	1.35901e+07	1.61526e+07	1.68268e+07	5.88786e+07	2.3204e+07	3.5725e+07	2.19126e+07	5.22066e+07	1.13373e+07	1.00087e+07	2.53046e+07	7.31191e+06	1.28423e+07	7.37473e+07	2.23032e+07	2.80094e+07	4.84934e+07	4.80055e+06	3.28924e+07	2.64996e+07	2.55327e+08	2.88305e+06	8.48523e+07	5.83246e+07	8.63626e+06	2.16498e+07	1.56145e+06	2.21284e+07	3.24904e+07	195269	3.18543e+08	3.17829e+07	1.29433e+07	4.33751e+06
P02795	Metallothionein-2	MT2A	0.707084	4.32021e+06	3.32519e+07	1.04133e+08	6.74668e+07	5.2396e+06	401240309	1.07625e+08	5.04559e+07	4.44637e+06	127510359	0	1.38412e+06	9.76541e+07	5.87916e+06	3.75844e+08	3.80883e+08	3.033e+07	3.97205e+08	1.53251e+06	0	2.91203e+07	5.07762e+07	3.45669e+07	7.08444e+06	0	1.14457e+06	5.00419e+08	4.04508e+07	1.0703e+08	0	3.63017e+07	9.13385e+06	1999154854	3.25863e+08	2.69755e+07	1.27125e+08	9.2636e+07	0	2.08166e+06	0	2495382381	0	1.33033e+08	0	1.10947e+07	4.31368e+06
P04070	Vitamin K-dependent protein C;Vitamin K-dependent protein C light chain;Vitamin K-dependent protein C heavy chain;Activation peptide	PROC	0.00244575	1.66376e+06	2.77941e+06	1.80724e+06	2.1488e+06	4.32048e+06	1.70366e+06	3.96729e+06	6.43025e+06	5.50419e+06	2.90278e+06	1.35407e+06	3.57522e+06	4.07763e+06	3.53143e+06	2.2787e+06	1.32949e+06	1.36694e+06	2.32799e+06	4.31287e+06	0	5.78413e+06	4.18092e+06	1.86477e+06	3.0768e+06	1.86637e+07	7.93033e+06	4.67794e+06	684957	1.47968e+06	2.60394e+06	7.09232e+06	1.72234e+07	2.30542e+06	2.46606e+06	3.42969e+06	6.22881e+06	1.171e+07	9.13645e+06	9.60501e+06	4.90059e+06	4.11032e+06	3.87743e+06	565296	8.94981e+06	2.18215e+06	1.16376e+07
P04083	Annexin A1	ANXA1	3.37e-20	3.95536e+07	2.01241e+08	2.21065e+08	2.59669e+08	5.35149e+07	7.35194e+07	7.29564e+07	7.49676e+07	1.01614e+08	1.00312e+08	9.78121e+07	4.47378e+07	3.42278e+07	1.80769e+08	2.55901e+07	6.11294e+07	8.93942e+07	7.94996e+07	1.04216e+08	1.46587e+08	4.60588e+07	5.67012e+07	4.45424e+07	3.4674e+07	2.11026e+08	7.87921e+07	9.27084e+07	5.42856e+07	4.36013e+07	3.12903e+08	1.91323e+08	5.93755e+07	129643307	1.10049e+08	3.1728e+08	1.02099e+08	1.25442e+07	149985384	6.85789e+07	5.93113e+07	2.91866e+07	1.76838e+07	1.33114e+07	2.10019e+07	1.50421e+08	2.70775e+07
P04179	Superoxide dismutase [Mn], mitochondrial	SOD2	0.000144467	3.68034e+08	7.87818e+08	6.30202e+08	3.92323e+08	5.03216e+08	9.50783e+08	352713904	6.94616e+08	3.5021e+08	1669887981	4.74529e+08	7.54375e+08	2.48559e+08	9.9158e+08	6.33882e+08	1843885773	380099949	5.07312e+08	2.69358e+08	4.81543e+08	4.84837e+08	3.621e+08	2848643326	4.20111e+08	4.18775e+08	7.4559e+08	4.76274e+08	1775386786	3.02604e+08	6.65222e+08	859005958	1018289425	1381967085	4.6688e+08	5.89237e+08	3.9512e+08	2.22731e+08	4.66739e+07	9.1031e+08	3.52859e+08	7.6765e+07	1.31276e+08	1181267319	2.01846e+08	4.38297e+08	1.00228e+08
P04216	Thy-1 membrane glycoprotein	THY1	1.78e-06	5.6551e+06	5.95948e+07	7.0891e+07	1.47627e+08	3.62561e+07	2.70954e+07	8.58223e+07	1.55522e+07	2.576e+07	1.12797e+08	1.47285e+08	4.79135e+07	2.99431e+07	193876059	2.34873e+07	4.1263e+07	2.54117e+07	5.56073e+07	4.25782e+07	2.76366e+07	2.23792e+07	3.77889e+07	1.84717e+07	2.42233e+07	1.68003e+08	6.30413e+07	4.1098e+07	9.28702e+07	5.36265e+06	1.6339e+08	1.72647e+08	3.81674e+07	5.39283e+07	4.45744e+07	1.86948e+08	7.42531e+07	28117664	2.08837e+08	22727744	4.78338e+07	1.4032e+07	2.9972e+07	2.88931e+07	5.72137e+07	2.02398e+07	1.54779e+07
P04233	HLA class II histocompatibility antigen gamma chain	CD74	2.01e-07	3.19594e+07	1.81206e+07	2.86877e+07	1.00621e+07	2.82783e+07	3.64297e+07	3.75327e+06	9.41609e+06	1.75741e+07	3.78769e+07	9.07219e+07	2.99312e+07	1.272e+06	4.35165e+07	1.41395e+06	2.84011e+07	1.12138e+07	3.6315e+06	2.72481e+07	2.83074e+07	2.55045e+07	7.87476e+06	7.9338e+06	1.92485e+07	9.62841e+06	8.00627e+06	7.90013e+06	1.77368e+06	895273	6.58695e+06	7.78146e+07	1.41305e+07	1.48026e+07	9.34929e+06	1.47784e+07	1.7318e+07	836792	6.30195e+06	1.01493e+07	6.16352e+06	2.15775e+06	0	2.39548e+07	919802	4.32165e+07	0
P04271	Protein S100-B	S100B	0.000162809	0	0	4.26402e+06	3.25658e+07	0	0	0	0	0	0	0	0	6.78003e+06	0	0	0	0	0	0	0	0	0	2.25549e+06	0	0	3.43611e+06	0	0	2.7308e+06	0	2.46458e+06	193381	0	0	4.59299e+06	0	0	8.63566e+06	0	0	0	4.59903e+06	0	0	0	0
P04424	Argininosuccinate lyase	ASL	2.55e-05	2.76349e+08	4.25159e+08	1.71427e+08	2.70398e+08	515602662	5.91973e+08	501244004	3.25748e+08	1.9664e+08	3.63718e+08	4.62594e+08	1.95354e+08	4.39752e+08	3.1222e+08	5.4836e+08	336377781	6.93463e+08	469591132	2.44433e+08	4.57835e+08	1.64346e+08	1.5755e+08	8.42083e+07	2.82143e+08	1.9487e+08	3.71986e+08	4.82979e+08	2.75356e+08	2.8717e+08	3.11076e+08	1.31222e+08	263417718	4.41599e+08	374972794	5.37436e+08	1.94073e+08	6.53617e+07	1.91836e+08	2.38426e+08	1.2828e+08	2.08606e+08	1.99498e+08	4.75627e+07	7.10531e+07	3.02381e+08	496943243
P04440	HLA class II histocompatibility antigen, DP beta 1 chain	HLA-DPB1	0.0021388	0	6.16009e+06	844870	0	1.43721e+06	6.93317e+06	820773	624758	779265	2.08975e+06	871825	0	0	0	0	3.91496e+06	327563	0	694120	3.91374e+06	0	0	0	0	0	0	1.38641e+06	0	0	728693	1.23977e+06	0	1.53095e+06	7.13731e+06	151164	0	0	0	2.29426e+06	409099	0	0	0	0	4.50236e+06	0
P04839	Cytochrome b-245 heavy chain	CYBB	1.59e-07	1.96544e+06	1.30836e+07	8.20247e+06	1.36059e+07	2.73188e+06	6.12283e+06	6.4668e+06	4.30789e+06	1.67485e+07	2.66834e+06	4.02282e+06	3.96865e+06	412888	6.2722e+06	505665	9.11933e+06	1.17152e+07	1.21394e+06	1.03158e+07	1.72381e+07	3.1976e+06	716695	1.50401e+06	2.5152e+06	3.1287e+06	445641	6.0113e+06	3.36023e+06	2.65719e+06	1.17517e+07	4.10643e+06	6.75859e+06	7.04571e+06	1.20136e+07	4.15016e+06	4.38293e+06	294973	4.49603e+06	1.32887e+07	273829	0	0	3.73117e+06	177091	835171	178359
P05062	Fructose-bisphosphate aldolase B	ALDOB	2.85e-06	3.17437e+08	3500115995	1359168126	2585921201	1703494150	7.84705e+08	3155715959	8.84693e+08	3904282883	2301226310	1787440533	1371878791	6.07444e+08	1865481181	4248675721	1493270421	4650403975	3499285993	2436343611	1014756845	2919706376	2502194704	1759939802	1155387403	8.75341e+08	3006572786	3910305605	9.24831e+08	1826090494	2339869484	2963055725	3230884980	2879776051	1996039517	1296696620	2666096454	1176560373	4090592698	4.79643e+08	3285825861	2747264247	1018658041	5.70305e+08	1.444e+08	3633101294	4.49273e+08
P05089	Arginase-1	ARG1	5.11e-05	2.13968e+08	2124757594	5.30778e+08	1392603352	9.62827e+08	2.6866e+08	2276021039	7.01976e+08	6.80775e+08	2.91244e+08	6.57734e+08	1403971971	9.74984e+08	8.69832e+08	1772986118	2183920058	1956980540	1268977161	7.97464e+08	1299928749	3.58991e+08	8.73345e+08	4.63807e+08	8.59033e+08	4.38611e+08	1107446318	6.18312e+08	1021118373	6.05473e+08	7.68706e+08	1276231376	1094071029	3.61732e+08	8.10498e+08	9.46825e+08	2.35876e+08	6.84322e+08	9.54905e+08	5.68101e+08	4.95248e+08	3.0738e+08	7.0196e+08	3.20427e+08	1.79922e+08	1339327279	1607715745
P05107	Integrin beta-2	ITGB2	7.46e-09	420924	2.16673e+06	7.67695e+06	3.95024e+06	1.18697e+06	1.25092e+06	3.78665e+06	8.29504e+06	2.8795e+06	3.23805e+06	4.18049e+07	710654	2.30412e+06	2.60951e+06	0	1.98814e+06	5.53758e+06	2.55312e+06	2.78211e+06	10461785	2.28317e+06	752042	1.08824e+06	116540	3.02596e+07	2.51551e+06	4.9535e+06	295360	0	5.34722e+06	2.78941e+06	1.83349e+07	1.48723e+07	4.1433e+06	4.97699e+06	7.14129e+06	217696	793302	7.11069e+06	2.21639e+07	2.1797e+06	193336	523031	0	1.843e+06	53327.8
P05156	Complement factor I;Complement factor I heavy chain;Complement factor I light chain	CFI	0.000191061	3.39158e+06	1.33028e+07	4.8247e+06	6.08903e+06	7.84611e+06	1.21376e+07	2.54945e+06	9.4844e+06	3.72506e+06	1.52574e+07	8.72711e+06	6.56226e+06	4.50988e+06	1.21528e+07	3.23916e+06	2.78063e+06	3.5533e+06	5.68306e+06	5.75727e+06	3.66834e+06	1.28013e+07	2.16746e+06	2.99442e+06	9.30957e+06	1.31949e+07	6.17591e+06	1.18785e+07	5.17243e+06	1.31316e+06	9.18143e+06	1.46526e+07	1.10014e+07	1.41221e+07	3.56027e+06	1.15414e+07	1.13273e+07	2.42464e+06	6.78095e+06	5.07496e+06	922227	2.63568e+06	522467	1.28311e+07	551892	4.21239e+06	1.94718e+06
P05164	Myeloperoxidase;Myeloperoxidase;89 kDa myeloperoxidase;84 kDa myeloperoxidase;Myeloperoxidase light chain;Myeloperoxidase heavy chain	MPO	0.0053714	590437	493661	461122	7.9584e+06	6287.95	2.14184e+06	3.34256e+06	148958	2.54406e+06	1.54739e+06	596704	0	0	0	0	1.69286e+06	1.03201e+07	1.66118e+06	3.28346e+06	8.60696e+07	1.41406e+06	0	2.37767e+06	281311	3.78972e+06	3.55911e+06	3.07887e+06	1.34441e+06	1.53295e+06	2.94424e+06	1.04836e+06	3.69414e+06	7.19352e+06	7.51051e+06	1.27506e+06	1.42498e+06	265216	0	3.45154e+07	433912	275008	4.92159e+06	2.55316e+06	0	336945	0
P05177	Cytochrome P450 1A2	CYP1A2	0.00763679	54156092	830703	9.58761e+07	1.26881e+08	329144	2.20771e+07	0	8.25108e+07	2.36789e+07	16043988	0	8.26257e+06	5.72967e+07	5.05574e+06	1.36037e+08	1.305e+07	7.1294e+06	189504	7.19421e+07	2.08645e+06	2.38436e+07	81476.2	1.50138e+07	127020014	1.1166e+08	676909	1.02755e+06	1.51108e+06	1.72562e+08	0	6.95153e+06	0	0	2.96377e+08	1.5025e+07	234625	303187	0	23448.7	0	0	44613.9	4.23363e+07	4.20498e+07	499514	0
P05186	Alkaline phosphatase, tissue-nonspecific isozyme	ALPL	0.032279	0	783718	3.49237e+06	3.60457e+06	224382	119800	59049.2	993385	1.14018e+06	1.99988e+06	0	465149	0	2.10147e+07	54377.4	862600	4.62875e+06	1.39159e+06	3.06234e+06	0	4.49406e+06	531490	1.90915e+06	373707	779741	0	3.33716e+06	171063	1.11878e+06	831091	2.92112e+06	216303	1.36164e+07	1.47491e+07	1.74569e+06	0	0	0	294104	0	615464	0	217401	0	7.95744e+06	59959.4
P05362	Intercellular adhesion molecule 1	ICAM1	7.68e-06	1.00248e+07	1.23863e+07	2.22641e+07	6.48553e+06	7.5973e+06	9.50877e+06	2.0811e+06	1.92996e+07	1.12679e+07	3.17923e+07	9.7331e+06	3.06408e+06	5.41261e+06	7.84386e+07	2.12806e+06	1.54354e+07	9.58323e+06	1.78889e+06	6.95208e+06	1.50131e+07	3.22274e+07	8.2992e+06	6.94032e+06	1.35558e+07	1.13207e+07	2.90979e+06	9.50151e+06	2.24557e+07	7.26241e+06	5.09268e+06	1.63128e+07	4.06728e+07	3.61502e+07	7.83739e+06	7.84732e+06	3.39236e+06	518361	4.02922e+06	5.00359e+07	2.56775e+06	138197	6.47844e+06	2.05426e+07	326452	3.13031e+06	1.08305e+06
P05771	Protein kinase C beta type	PRKCB	4.74e-06	0	551104	0	296679	0	0	168103	52414.2	297196	0	47099.1	0	0	0	0	0	0	0	434190	90712.3	0	0	0	0	0	193870	98279.2	0	0	0	159593	98704	136735	0	0	270888	0	0	134129	0	0	0	0	0	0	0
P06133	UDP-glucuronosyltransferase 2B4	UGT2B4	3.51e-05	7.00033e+07	6.88646e+07	1.5782e+08	1.53451e+08	7.59759e+07	2.18096e+08	1.03445e+08	1.64148e+08	1.56581e+07	7.25963e+07	8.41861e+07	6.31696e+08	2.63492e+08	4.92787e+07	8.03064e+07	1.93965e+08	1.11717e+08	7.40293e+07	1.17549e+08	3.63844e+08	3.18131e+07	6.07335e+07	2.08331e+08	1.87314e+08	3.15975e+08	1.15596e+08	3.33465e+07	2.42987e+08	2.32056e+08	6.4785e+06	1.70714e+08	1.66704e+08	4.52046e+07	1.85986e+08	127796969	9.7912e+07	1.53072e+07	5.42787e+07	1.29601e+07	1.33188e+08	4.15432e+07	1.94634e+07	1.70226e+08	7.63783e+07	2.1519e+08	1.90455e+07
P06396	Gelsolin	GSN	5.48e-14	1.98689e+07	1.81712e+07	9.19533e+07	8.27315e+07	2.78512e+07	5.42592e+07	4.39287e+07	2.95064e+07	3.48882e+07	3.43358e+07	9.4705e+07	2.85804e+07	2.64777e+07	8.08701e+07	7.81212e+06	4.94787e+07	2.0847e+07	5.28649e+07	2.55992e+07	3.07516e+07	6.98678e+07	5.19412e+07	3.66575e+07	2.08949e+07	1.28052e+08	8.85035e+06	4.09391e+07	2.90396e+07	1.05201e+07	1.00877e+08	1.27056e+08	3.31867e+07	8.54269e+07	5.19139e+07	1.29612e+08	2.42619e+07	1.71474e+07	75511257	9.29631e+07	2.6295e+07	5.42615e+07	8.57437e+06	60796808	7.23209e+06	4.61296e+07	4.04249e+07
P06493	Cyclin-dependent kinase 1	CDK1	0.0036468	263148	0	234004	0	182571	0	359154	0	0	0	590984	0	0	220882	0	0	0	0	0	0	0	928235	0	0	0	855827	0	630787	0	0	0	0	0	0	0	658098	359991	0	733823	1.78573e+06	9.94321e+06	770163	0	599637	2.24095e+06	1.31038e+06
P06729	T-cell surface antigen CD2	CD2	0.000395705	0	153859	0	144839	0	0	0	500429	1.2061e+06	0	85675.5	0	0	465549	0	0	67687.2	0	291531	55986.7	778860	0	0	0	327639	0	0	0	0	0	1.24432e+06	613256	0	0	137947	105702	0	0	356212	44436.1	0	0	0	0	106521	0
P06756	Integrin alpha-V;Integrin alpha-V heavy chain;Integrin alpha-V light chain	ITGAV	3.12e-09	595536	6.35921e+06	2.71909e+06	6.60073e+06	947223	577315	1.74812e+06	1.84902e+06	2.36882e+06	2.02511e+06	5.75652e+06	1.65077e+06	274421	5.12713e+06	585716	2.92339e+06	2.97218e+06	4.04946e+06	2.04711e+06	3.19996e+06	1.21971e+06	1.30938e+06	270548	156111	3.5573e+06	1.24774e+06	1.84291e+06	2.68912e+06	577319	5.82625e+06	8.15714e+06	1.18469e+06	466714	3.38843e+06	6.9546e+06	1.37812e+06	747278	1.16665e+06	1.02944e+06	289549	179644	4.33695e+06	2.19395e+06	470599	1.00647e+06	63665.6
P07099	Epoxide hydrolase 1	EPHX1	2.89e-06	2704418674	1478701342	2208066530	1775967930	2379493011	2139452889	1910325628	3111716910	2987642780	7.21814e+08	1484380086	3008226650	2975773401	1685086573	1460367447	1715751697	2041061490	2317737956	2009692802	2788742162	789716654	2371585157	1174959655	1820764800	3634598606	1815157620	1037241490	2280575987	1909389639	8.45484e+08	2451725272	2451269480	2303129873	1838935616	2596470796	1852608630	3471396165	1125310990	1993617091	2100457031	1282786341	1002161074	1045779304	2966771745	1897658382	1507545363
P07195	L-lactate dehydrogenase B chain	LDHB	1.46e-08	5.55009e+07	8.04555e+07	105054071	1.09981e+08	5.25396e+07	4.49028e+07	5.03993e+07	2.2844e+07	7.28252e+07	1.36593e+08	5.0235e+07	3.11969e+07	4.19637e+07	1.26105e+08	1.78688e+07	6.40087e+07	4.05897e+07	6.11259e+07	7.54817e+07	4.79284e+07	1.1054e+08	3.61168e+07	4.1003e+07	5.11984e+07	4.81261e+07	3.83578e+07	6.57575e+07	2.22151e+07	5.01954e+07	1.80766e+08	7.8154e+07	6.3252e+07	1.02053e+08	5.98831e+07	1.1814e+08	1.22992e+08	3.86985e+07	4.39781e+07	1.68545e+08	3.40674e+07	1.82828e+07	1.96623e+07	7.4773e+07	1.82914e+07	4.54558e+07	2.7488e+07
P07225	Vitamin K-dependent protein S	PROS1	0.0904598	4.47908e+06	2.60221e+06	2.55829e+06	3.81443e+06	6.78964e+06	8.06695e+06	1.8045e+06	2.74648e+06	1.26589e+07	1.56666e+07	8.73704e+06	6.77973e+06	1.02507e+06	5.57195e+06	1.53312e+06	947768	3.46112e+06	2.91178e+06	1.14343e+06	3.76558e+06	5.60255e+06	3.26712e+06	3.65348e+06	3.12359e+06	7.43951e+06	2.75209e+06	9.94854e+06	3.02595e+06	514515	7.06132e+06	1.0175e+07	3.02712e+06	1.21443e+07	2.03643e+06	7.73277e+06	5.97158e+06	7.62102e+06	5.10616e+06	1.01138e+07	4.65846e+06	2.00498e+06	4.8524e+06	2.31804e+06	507978	2.88848e+06	6.05258e+06
P07585	Decorin	DCN	2.4e-06	0	3.55428e+06	2.24812e+07	1.02537e+08	1.84305e+06	1.03276e+06	728399	2.49114e+06	7.7124e+06	0	1.1622e+07	0	1.43882e+06	3.81975e+07	0	2.80995e+06	152504	2.34275e+07	8.96117e+06	456657	6.41621e+06	1.8878e+06	2.53802e+06	459118	4.0359e+07	322356	4.80789e+06	1.2107e+06	1.71094e+06	2.06605e+07	4.19616e+07	0	438555	1.62976e+07	3.74801e+07	0	0	0	0	0	770071	0	146626	0	0	0
P07766	T-cell surface glycoprotein CD3 epsilon chain	CD3E	2.79e-07	0	285741	538123	1.43247e+06	0	0	0	259678	0	0	0	0	0	677153	0	0	0	0	321564	0	0	0	0	0	0	0	0	0	0	0	480219	0	495489	0	735266	998443	0	0	364998	0	0	0	0	0	415218	0
P07942	Laminin subunit beta-1	LAMB1	2.98e-07	1.06937e+06	532974	3.77049e+06	1.79784e+06	4.16256e+06	4.69878e+06	4.02279e+06	1.65909e+06	128160	2.35176e+06	1.12582e+07	1.60266e+06	593746	1.76214e+06	101694	1.89897e+06	56404.3	1.31707e+06	90231.7	9.16634e+06	2.40169e+06	554021	805782	383554	4.38675e+06	4.89788e+06	1.83279e+06	603905	0	2.11201e+06	5.31158e+06	97416.2	555924	403984	945203	3.99191e+06	144555	9.63105e+06	3.98657e+06	1.12028e+06	567799	3.00985e+06	442851	1.54759e+06	3.21485e+06	27993.7
P07948	Tyrosine-protein kinase Lyn	LYN	9.27e-08	1.40952e+06	3.73757e+06	5.03608e+06	6.01906e+06	660096	4.66285e+06	1.03322e+06	3.91492e+06	2.14278e+06	7.63961e+06	4.44755e+06	2.15569e+06	1.53828e+06	7.67109e+06	396796	810343	3.73242e+06	894993	2.63784e+06	9.38698e+06	1.15387e+06	865404	6.52288e+06	1.1823e+06	6.88352e+06	1.60675e+06	3.65991e+06	1.95408e+06	0	3.46322e+06	4.33286e+06	2.53348e+06	6.66781e+06	3.33627e+06	4.84331e+06	3.48556e+06	0	1.51266e+06	9.26878e+06	736725	153535	7.57883e+06	3.61887e+06	5.93292e+06	2.34568e+06	1.25431e+06
P07951	Tropomyosin beta chain	TPM2	2.95e-08	2.83143e+06	2.11166e+07	5.39026e+07	7.53713e+07	3.13164e+06	1.11396e+07	7.39952e+06	4.97379e+06	2.81461e+07	3.60278e+06	3.14063e+07	7.95736e+06	5.8948e+06	4.1198e+07	1.21422e+06	3.00834e+07	7.43191e+06	1.21262e+07	1.34052e+07	8.05032e+06	643576	1.37304e+07	4.66006e+06	4.38828e+06	5.90549e+07	1.69673e+07	1.77097e+07	5.35611e+06	8.38186e+06	7.48254e+07	6.70755e+07	4.24729e+06	2.39003e+06	3.84642e+07	6.04576e+07	8.44645e+06	1.94935e+06	1.85321e+07	6.8496e+06	7.31534e+06	3.14517e+06	2.89499e+06	1.83801e+07	4.36181e+06	7.8233e+06	5.36496e+06
P07996	Thrombospondin-1	THBS1	2.28e-07	1.11482e+07	4.33125e+06	1.73444e+07	3.8384e+06	713038	4.31786e+06	565058	1.13375e+06	5.94891e+06	313572	3.99486e+06	142674	73783	12337616	2.60793e+06	9.92032e+06	814591	1.32024e+06	344213	1.26461e+06	699664	2.02329e+06	168900	676591	3.96265e+07	1.3276e+06	4.42188e+06	5.06538e+06	1.24194e+06	2.00097e+07	1.62065e+07	1.76953e+07	7.22189e+06	3.40478e+06	8.03554e+06	788443	255466	2.95227e+06	1.50345e+07	51484.1	0	146412	3.00106e+06	0	180904	2.99184e+07
P08123	Collagen alpha-2(I) chain	COL1A2	0.000698428	27987.5	409433	678669	3.8538e+06	0	5.47829e+06	1.80238e+07	0	417577	0	1.00652e+06	0	1.01263e+06	3.08593e+06	0	2.35188e+06	136291	2.72828e+06	187020	50282.8	1.87242e+07	170339	39822.4	47542.9	2.3783e+06	0	454435	1.47202e+06	0	1.27289e+06	1.74955e+06	0	83572	490609	1.91104e+06	1.89045e+07	0	382335	46413.9	172731	495629	0	206246	0	124970	0
P08138	Tumor necrosis factor receptor superfamily member 16	NGFR	3.72e-05	0	305252	3.91401e+06	8.31825e+06	288102	0	174436	1.65043e+06	608275	0	2.4113e+06	0	0	6.59685e+06	0	346662	1.59713e+06	1.194e+06	2.19368e+06	0	0	0	0	0	938147	0	173228	208256	291240	1.34797e+06	2.62413e+06	0	0	527785	6.04025e+06	0	0	270939	0	0	0	0	0	0	629543	0
P08195	4F2 cell-surface antigen heavy chain	SLC3A2	0.00245723	1.89778e+06	924733	2.26304e+06	1.1557e+06	8.33155e+06	1.3875e+06	1.05319e+06	1.99179e+06	1.31792e+06	936272	2.663e+06	739245	4.57566e+06	1.92101e+06	152587	4.06471e+06	2.3931e+06	1.10163e+06	1.56892e+06	1.50554e+06	1.56219e+06	0	614595	1.62969e+06	2.0613e+06	1.31681e+06	426785	2.94559e+06	266425	1.35624e+06	4.55589e+06	1.47398e+06	2.46272e+06	707613	2.34183e+06	1.72907e+06	713872	1.69144e+06	3.31376e+06	501502	314554	4.95433e+06	1.77462e+06	643849	1.55012e+06	421889
P08237	ATP-dependent 6-phosphofructokinase, muscle type	PFKM	0.174092	436692	691195	1.49687e+06	3.25786e+06	578872	189993	724630	278138	2.11714e+06	469447	1.43727e+06	458424	615553	1.83783e+06	321634	439201	671058	736451	1.01304e+06	1.26908e+06	277242	270547	342704	2.48407e+06	1.26682e+06	639326	159855	659417	1.77436e+06	5.68334e+06	1.00878e+06	0	427445	857012	2.99465e+06	6.02896e+06	104448	1.88375e+06	5.3601e+06	279182	0	69430.1	164538	496260	117549	1.32634e+07
P08243	Asparagine synthetase [glutamine-hydrolyzing]	ASNS	0.00758216	0	0	0	0	0	0	0	0	0	0	411993	714049	0	0	0	0	0	0	0	0	0	227007	0	0	0	0	0	285002	0	0	972935	769913	1.37593e+06	0	0	2.08672e+06	79846.7	0	1.37193e+06	0	0	0	0	209304	0	0
P08263	Glutathione S-transferase A1;Glutathione S-transferase A1, N-terminally processed	GSTA1	2.25e-06	2082174475	3207947056	1564543375	2318231515	2645048826	2446528722	2794576016	1797664664	1797101401	1092760762	3655599803	3217146603	2810447166	4024644798	2815770049	3454592949	2839156744	6179185027	2889942113	3437433655	2040447195	3142328585	6.51577e+08	1339961359	2653706949	2.81792e+07	1800353490	2181361191	2106019719	1664511582	3132455534	1826965742	2.97722e+07	2178558044	2870248584	2402195096	2669908568	2057699688	1737983452	4031007056	3581963802	2913584685	4445490239	2282732852	2411479401	2871764132
P08294	Extracellular superoxide dismutase [Cu-Zn]	SOD3	7.92e-05	0	1.45958e+06	5.44959e+07	6.18072e+07	0	175614	2.07913e+07	843915	1.49e+06	0	1.37591e+06	0	3.4553e+06	1.24014e+07	545616	1.36363e+06	810804	778632	2.67451e+06	5.84345e+06	0	1.24333e+06	0	0	4.57679e+07	278890	1.36065e+06	753216	1.55496e+06	1.10029e+07	4.70109e+07	237767	0	1.41936e+07	1.74887e+07	1.85549e+06	356460	297757	0	0	0	0	1.4819e+06	0	0	0
P08319	Alcohol dehydrogenase 4	ADH4	1.61e-06	2292361843	1269523531	2416970717	5786859212	5.89218e+07	1376179578	2176447657	2469367171	1.68303e+08	2106781281	2064250732	1634106842	2291785631	3584177682	1932517014	1777601367	3211862890	8.08254e+08	2724531527	519379106	1870318770	5.68512e+08	783944763	2868201488	4.09192e+08	3.30696e+07	9.52276e+08	1.59037e+08	1612253264	8.96232e+07	1103262481	173134663	1.12942e+07	2277977412	2350975155	2193368664	4.29511e+08	1.00415e+07	8.5658e+07	3.90306e+07	1078399875	2.91597e+07	6.98862e+08	5.89695e+08	2927774001	749436334
P08567	Pleckstrin	PLEK	1.85e-06	8.94817e+06	9.54845e+06	1.3637e+07	8.7624e+06	1.20866e+06	3.16185e+06	5.31058e+06	2.85773e+06	2.80123e+07	6.51708e+06	7.67292e+06	4.50212e+06	4.14835e+06	6.82934e+06	2.4228e+06	994853	7.7059e+06	1.12239e+06	1.59707e+07	5.67561e+06	3.53269e+06	2.75668e+06	6.49134e+06	3.00749e+06	3.52333e+06	7.9401e+06	1.42627e+07	0	3.60065e+06	1.66806e+07	7.2833e+06	9.34148e+06	2.47581e+07	1.19628e+07	9.83671e+06	1.95015e+07	218903	3.3082e+06	1.9197e+07	7.92027e+06	0	0	1.27446e+06	996461	3.36382e+07	586352
P08575	Receptor-type tyrosine-protein phosphatase C	PTPRC	4.1e-12	906494	5.49291e+06	6.34741e+06	8.25973e+06	943667	1.20337e+06	1.48205e+06	1.88135e+06	8.74529e+06	3.55523e+06	4.15138e+06	1.42208e+06	468264	7.34002e+06	266509	1.60013e+06	5.05735e+06	1.01407e+06	7.08478e+06	4.68962e+06	1.02621e+06	534964	1.48318e+06	847795	4.37241e+06	2.00005e+06	4.02321e+06	155576	551895	5.21567e+06	6.25005e+06	2.12117e+06	9.06737e+06	3.34828e+06	7.05466e+06	6.47333e+06	0	1.07168e+06	7.63297e+06	1.39889e+06	146173	0	289541	0	4.63839e+06	267916
P08579	U2 small nuclear ribonucleoprotein B	SNRPB2	4.73e-05	1.06324e+07	4.2966e+06	3.63786e+06	1.58502e+07	1.13604e+07	9.03089e+06	1.65274e+07	6.45606e+06	9.01483e+06	4.62368e+06	2.65813e+07	884923	9.57551e+06	3.23989e+07	1.82161e+06	3.8838e+06	6.4863e+06	2.03586e+06	1.00249e+06	1.74075e+06	1.10699e+07	5.741e+06	1.94625e+07	9.33506e+06	1.35652e+07	1.19551e+07	1.13449e+07	2.63971e+07	0	9.99553e+06	1.76099e+07	2.08364e+07	309291	1.14309e+07	7.10699e+06	6.21388e+06	2.14478e+07	2.98874e+07	3.74044e+07	2.14074e+07	1.07825e+07	3.27072e+07	1.29212e+07	2.35731e+07	2.01216e+07	2.02041e+07
P08631	Tyrosine-protein kinase HCK	HCK	2.08e-06	253483	1.65498e+06	427323	839129	0	0	0	196147	50122.4	464977	78809.6	0	0	553376	0	453402	1.22349e+06	0	441526	813126	0	167673	0	0	0	140257	153371	122110	0	166334	397427	669233	945654	638859	1.21798e+06	0	0	170789	1.63825e+06	352019	0	0	0	0	608079	0
P08684	Cytochrome P450 3A4	CYP3A4	0.000219022	6.19914e+08	9.44277e+07	2.65516e+08	1.86657e+08	0	4.92101e+07	4.02959e+06	4.43619e+08	2.25814e+07	0	5.00517e+07	3.33224e+07	1.03599e+08	5.93308e+06	5.08187e+07	7.15569e+07	3.67741e+06	7.04478e+07	8.74979e+07	7.15341e+06	1.19712e+06	129308	715475	351795764	105969664	0	279426	178570	2.49011e+08	1.13863e+06	1.12643e+07	1.02022e+07	0	223889089	2.41338e+07	5.45707e+07	0	0	1.65269e+07	2.78952e+06	860907	1.3097e+07	1.26864e+07	1.00599e+08	0	0
P08727	Keratin, type I cytoskeletal 19	KRT19	0.0445879	0	0	5.33187e+06	2.2733e+07	0	0	0	0	493973	210402	0	0	0	0	0	1.14203e+06	0	0	6.5798e+06	0	0	0	514189	0	1.49269e+06	0	0	58630.9	3.80211e+06	1.90683e+07	261999	0	0	3.32428e+06	1.47384e+07	0	0	0	486716	0	0	0	0	0	0	0
P08729	Keratin, type II cytoskeletal 7	KRT7	0.339199	0	0	7.10271e+06	2.00809e+07	2.9022e+06	4.15797e+06	376344	9.82363e+07	2.91953e+06	0	541882	771019	1.23109e+06	1.0351e+07	0	1.62811e+08	3.0922e+06	6.90922e+06	1.41881e+07	1.36742e+07	1.64957e+06	2.52763e+08	3.48275e+06	2.10722e+06	9.73307e+06	0	145605	4.52116e+06	5.13737e+06	1.02457e+08	489874	0	0	4.27985e+07	3.18017e+07	0	1.72735e+06	0	977517	0	0	0	78381.2	0	536000	809079
P09104	Gamma-enolase	ENO2	0.0101437	5.40094e+06	415251	2.00395e+06	3.64008e+06	0	0	0	0	542822	0	6.42836e+06	0	0	1.52186e+06	4.07292e+07	1.82165e+06	5.93581e+06	0	123435	0	4.99157e+07	0	104723	267122	2.76609e+06	258809	372331	0	0	2.61694e+06	3.58702e+06	203729	330628	726041	2.58534e+06	162879	0	0	3.25922e+06	0	7.98769e+07	3.01318e+06	0	0	278724	194104
P09211	Glutathione S-transferase P	GSTP1	2.39e-09	3.48405e+07	1.0459e+08	2.28125e+08	1.68421e+08	7.14229e+07	6.74139e+07	9.79007e+07	9.20692e+07	1.23746e+08	6.27089e+07	1.12674e+08	4.12323e+07	6.72313e+07	1.41293e+08	2.24863e+07	1.79956e+08	1.01467e+08	3.17698e+07	1.64427e+08	1.01007e+08	4.49403e+07	2.87329e+07	6.05689e+07	3.99829e+07	2.25046e+08	5.91532e+07	7.79716e+07	1.37063e+08	4.21438e+07	3.69337e+08	1.59393e+08	8.88459e+07	2.1497e+08	1.35607e+08	3.15584e+08	1.07927e+08	2.94307e+07	1.51223e+08	9.53361e+07	5.32731e+07	2.51877e+07	4.11494e+06	2.6941e+07	1.20968e+07	1.56267e+08	1.60717e+07
P09234	U1 small nuclear ribonucleoprotein C	SNRPC	8.11e-05	7.14623e+06	3.57958e+06	3.52867e+06	0	0	2.97905e+07	0	1.78039e+06	0	3.72849e+06	9.64022e+06	640763	2.57597e+06	9.6801e+06	0	4.39444e+07	638367	3.35075e+07	5.15156e+06	0	5.89623e+06	3.96913e+06	2.66249e+06	0	5.5997e+06	4.22405e+06	3.16262e+06	1.3785e+07	0	316949	1.22666e+07	1.14778e+07	2.45952e+06	0	4.50932e+06	588972	1.37685e+07	8.57327e+06	3.57989e+06	7.86287e+06	8.54186e+07	1.14887e+07	2.5715e+07	1.06623e+06	1.70388e+07	1.42971e+07
P09326	CD48 antigen	CD48	4.15e-05	0	326801	335635	1.9692e+06	0	0	0	0	0	0	0	0	0	1.04774e+06	0	0	695975	0	0	0	0	0	0	0	225575	0	275032	0	0	0	163193	226771	839771	369596	0	0	0	0	904498	0	0	0	0	0	89489.7	0
P09327	Villin-1	VIL1	0.00502504	4.32545e+07	93319.6	917434	6.10499e+06	0	705105	1.45387e+06	87427.6	9.50857e+06	0	1.0245e+08	425261	25311.5	5.12662e+07	1.54175e+06	2.12326e+06	1.86568e+06	1.40172e+06	602282	5.20926e+06	2.5791e+06	1.24456e+08	3.08302e+06	0	5.61144e+06	2.03779e+07	0	0	1.65884e+06	4.07496e+06	5.98897e+06	3.14902e+06	1.15802e+07	5.42857e+06	3.40129e+07	1.01093e+08	3.15637e+06	8.49656e+07	9.74232e+07	4.48728e+07	5.92525e+07	1.81305e+08	7292772	1.08357e+07	1.41722e+06	8.57568e+07
P09486	SPARC	SPARC	5.81e-10	1.39285e+06	6.00372e+06	2.36023e+06	3.46974e+06	1.15052e+06	6.39845e+06	5.79755e+06	553948	1.35418e+06	9.69358e+06	4.15634e+06	0	0	1.33021e+07	0	4.5151e+06	1.45116e+06	3.03126e+06	0	3.04412e+06	1.94885e+06	0	353386	831876	8.9281e+06	1.70695e+06	944640	7.16197e+06	419187	2.59326e+07	6.62077e+06	766283	899931	4.46068e+06	5.4645e+06	4.74074e+06	408972	6.19177e+06	1.43581e+06	610855	823781	348469	767504	2.92523e+06	3.6751e+06	587725
P09601	Heme oxygenase 1	HMOX1	0.0017473	1.88416e+07	2.33449e+07	1.4994e+07	1.80486e+07	3.79909e+06	6.94935e+06	7.86352e+06	1.86777e+07	2.01365e+07	1.03154e+07	7.84926e+06	2.84002e+06	9.61367e+06	3.73045e+07	3.60722e+06	1.26237e+07	1.5271e+07	9.04373e+06	2.39774e+07	3.16287e+06	3.03594e+07	2.18857e+06	1.28202e+07	5.90152e+06	1.88932e+07	642344	8.47859e+06	1.0595e+06	6.40027e+06	7.49495e+06	1.18497e+07	7.35972e+06	1.89357e+07	1.77899e+07	8.30045e+06	8.65919e+06	0	2.31756e+06	9.63875e+06	896680	1.18418e+06	2.22647e+07	1.12562e+07	1.46787e+06	3.97653e+06	0
P09913	Interferon-induced protein with tetratricopeptide repeats 2	IFIT2	0.088112	880525	4.0266e+06	2.89734e+06	714424	490169	735184	8.055e+06	1.41112e+06	1.96104e+06	2.21866e+06	1.77145e+07	2.58665e+06	1.92345e+06	1.56006e+06	2.46689e+07	2.43765e+06	2.76213e+06	517946	3.92075e+06	1.03532e+07	1.07871e+07	1.16433e+06	3.33677e+06	1.35358e+06	610189	314911	2.81558e+06	1.52215e+06	938618	6.15463e+06	797379	252951	103148	1.53323e+06	591074	4.65069e+06	160818	1.82963e+06	7.61172e+06	995168	0	171853	170709	146121	5.12867e+06	385024
P09917	Arachidonate 5-lipoxygenase	ALOX5	9.36e-07	56259	186074	295575	768894	73726.5	0	0	121162	660509	0	283715	57058.9	0	92965.4	59568.3	0	205839	0	453237	3.159e+06	0	38128.5	212783	0	52337	1.53659e+06	107197	0	0	320460	1.20416e+06	39969.3	56491.9	642821	502765	190057	0	0	2.38858e+06	120838	0	0	0	0	0	0
P09936	Ubiquitin carboxyl-terminal hydrolase isozyme L1	UCHL1	0.0512602	0	833637	1.1037e+07	1.84525e+07	0	0	0	472681	0	0	5.31528e+06	0	0	8.36879e+06	0	5.77663e+06	618122	2.56849e+06	1.28995e+06	3.72729e+08	0	674863	0	0	1.26086e+07	0	522478	1.56241e+06	1.27113e+06	2.03671e+07	1.13725e+07	0	0	5.0079e+06	2.00077e+07	845182	0	0	0	0	646919	0	931645	0	0	0
P0C7P0	CDGSH iron-sulfur domain-containing protein 3, mitochondrial	CISD3	0.00233173	2.08564e+06	9.39633e+06	5.98235e+06	9.88223e+06	2.53519e+06	3.05934e+07	2.26574e+07	8.18959e+06	2.28281e+07	1.26418e+07	1.20747e+07	3.17166e+07	4.29082e+07	3.67052e+06	5.51329e+06	1.83812e+07	1.68247e+07	2.18134e+07	1.11879e+07	1.34931e+07	2.72361e+06	3.29365e+07	8.10257e+07	0	2.41187e+07	1.44607e+07	1.80713e+06	2.23854e+07	2.87198e+07	822549	7.53409e+06	3.42277e+07	1.03037e+07	1.4936e+06	1.38349e+07	8.1447e+06	5.36766e+07	9.68913e+06	4.88635e+06	3.92878e+07	2.55304e+07	5.42854e+06	0	1.62966e+07	1.46597e+07	3.13521e+06
P10321	HLA class I histocompatibility antigen, Cw-7 alpha chain	HLA-C	0.000129363	2.55785e+06	3.39563e+07	3.87269e+07	2.85477e+07	1.8182e+07	7.04752e+07	4.05499e+07	2.44752e+07	3.9934e+07	3.94869e+07	6.16164e+07	5.68705e+07	1.74872e+06	1.24572e+08	8.21517e+06	6.03495e+06	1.64916e+07	1.14064e+07	5.98355e+07	1.54973e+07	1.02765e+07	1.40481e+07	2.32666e+07	1.36417e+07	3.85157e+07	1.7918e+07	3.38253e+07	3.59402e+07	1.01195e+07	1.90059e+07	2.4388e+07	3.10859e+07	2.43274e+07	1.31856e+07	3.78177e+07	3.87726e+07	3.67108e+06	15503680	3.48369e+07	6.58403e+06	2.22237e+07	3.44517e+06	6.49179e+06	1.05918e+07	5.82934e+07	1.06251e+06
P10635	Cytochrome P450 2D6	CYP2D6	0.00413704	1.05275e+08	1.39892e+08	5.10979e+07	1.04922e+08	1.54446e+08	1.90185e+07	3.58872e+07	1.92301e+08	5.15405e+07	1.97559e+07	2.51762e+07	4.82829e+07	9.1778e+07	18671368	2.68551e+07	7.72714e+07	8.42757e+07	1.50016e+07	1.57114e+08	1.35372e+08	3.23495e+07	2.77133e+07	2.79329e+07	4.82602e+07	8.00152e+06	8.07766e+07	7.99976e+07	2.10864e+07	8.19022e+07	2.70758e+07	1.97109e+07	3.75773e+07	5.43212e+07	1.05368e+08	1.15295e+08	1.19805e+08	1.18534e+07	2.67977e+07	5.32744e+07	4.47145e+07	3.4616e+06	4.23476e+07	7.19065e+06	7.29087e+07	9.49154e+06	4.52713e+07
P11182	Lipoamide acyltransferase component of branched-chain alpha-keto acid dehydrogenase complex, mitochondrial	DBT	8.99e-08	1.98355e+07	3.40799e+07	2.93235e+07	4.23523e+07	3.36725e+07	1.28187e+07	3.71594e+07	2.6542e+07	1.82828e+07	2.80502e+07	3.62732e+07	3.47207e+07	3.89069e+07	7.4714e+06	2.74449e+07	2.25423e+07	3.31794e+07	2.1126e+07	2.64985e+07	35520460	2.03734e+07	2.68218e+07	7.21454e+07	3.10502e+07	1.88679e+07	5.82987e+07	2.63231e+07	2.33086e+07	3.03267e+07	3.33939e+07	2.43216e+07	3.14989e+07	1.07299e+07	4.52703e+07	1.29109e+07	1.9332e+07	3.91963e+07	2.87291e+07	1.27566e+07	2.38932e+07	2.84465e+07	2.70526e+07	1.3131e+07	4.9564e+07	4.31351e+07	9.44743e+06
P11215	Integrin alpha-M	ITGAM	2.99e-06	284075	555309	893291	993374	52976.3	0	133665	77931.9	330706	337149	388242	453003	30948.6	719725	0	727676	1.14841e+06	0	646993	7.52013e+06	52946.2	146312	742801	239070	920172	356531	588818	147736	100429	448068	1.42238e+06	778161	1.40153e+06	1.62459e+06	1.13138e+06	858007	0	0	1.91697e+06	26483.4	35783.1	87197.8	26109.1	0	99490.2	79506.7
P11310	Medium-chain specific acyl-CoA dehydrogenase, mitochondrial	ACADM	9.6e-07	6.48307e+07	3.36182e+08	1.02589e+08	161433658	8.53145e+07	8.45242e+07	1.90091e+08	2.20239e+08	3.56072e+08	64094020	1.73405e+08	1.89566e+08	1.75431e+08	4.30466e+07	1.9284e+08	1.54299e+08	3.06723e+08	3.34101e+08	1.78031e+08	2.05601e+08	1.19643e+08	1.61072e+08	347369156	2.08735e+08	8.84338e+07	7.16156e+08	1.28493e+08	3.2315e+08	1.32039e+08	3.07754e+08	1.1917e+08	1.34879e+08	9.38438e+07	2.07669e+08	1.41504e+08	3.33303e+07	1.30153e+08	1.47214e+08	1.45837e+08	2.04461e+08	2.17697e+08	1.05031e+08	6.50058e+07	2.20224e+08	7.42306e+07	2.38355e+07
P11498	Pyruvate carboxylase, mitochondrial	PC	0.000427066	1.20873e+08	1.68268e+08	3.15936e+08	2.14976e+08	9.47203e+08	1.91197e+08	2.27133e+08	168440454	263687967	5.05677e+08	7.69068e+07	4.92341e+07	2.21007e+08	1.8425e+08	2.41334e+08	1.77007e+08	1.69229e+08	1.31795e+08	1.87224e+08	353198454	2.2049e+08	2.4488e+08	5.91407e+08	1.88665e+08	2.90296e+08	1.44377e+08	1.59932e+08	417313914	2.24751e+08	3.20244e+08	2.81855e+08	1.22754e+08	5.19798e+07	2.78975e+08	1.49275e+08	2.83587e+08	7.50112e+08	7.41051e+07	2.0407e+08	7.81237e+07	1.33206e+08	8.56391e+07	1.16299e+08	289937349	1.88757e+08	1.98586e+08
P11509	Cytochrome P450 2A6	CYP2A6	5.45e-05	317539	1.35004e+08	5.70238e+06	190629910	3.05578e+08	2.08489e+07	443897869	6.44775e+07	1.84394e+08	1.5824e+07	4.7169e+08	2.74834e+08	1.41744e+08	1.80807e+07	2.09318e+08	218486398	4.83832e+07	1.04301e+08	1.40588e+08	1.91903e+07	6.36936e+07	6.63544e+08	2.97587e+07	9.51662e+06	1.24311e+08	2.36152e+08	1.3778e+08	6.25849e+08	6.89803e+07	9.03312e+06	9.49214e+07	2.61373e+07	1.23137e+08	1.46729e+07	3.38391e+07	1.03356e+07	1.84971e+08	3.53479e+08	0	112018251	323048972	874054	238080	2.50139e+06	314151000	0
P11586	C-1-tetrahydrofolate synthase, cytoplasmic;Methylenetetrahydrofolate dehydrogenase;Methenyltetrahydrofolate cyclohydrolase;Formyltetrahydrofolate synthetase;C-1-tetrahydrofolate synthase, cytoplasmic, N-terminally processed	MTHFD1	6.98e-08	6.60627e+08	2.8404e+08	3.76126e+08	2.96092e+08	2.26116e+08	416525078	3.56811e+08	2.95323e+08	3.0095e+08	1.67355e+08	2.12036e+08	1.26482e+08	5.10453e+08	2.10274e+08	3.33277e+08	2.46695e+08	4.08017e+08	2.58182e+08	313332457	1.74415e+08	2.83433e+08	2.06666e+08	9.56105e+07	4.14686e+08	1.99433e+08	2.34177e+08	1.69987e+08	9.33e+07	5.93992e+08	141107261	1.58093e+08	1.22114e+08	7.94582e+07	6.12765e+08	148030633	9.55638e+07	1.41862e+08	2.84429e+08	1.28043e+08	3.7689e+08	2.79776e+08	1.77569e+08	2.35159e+08	3.87822e+08	2.17561e+08	1.22539e+08
P11802	Cyclin-dependent kinase 4	CDK4	0.000645204	0	0	0	187648	0	497540	1.31618e+06	175311	0	0	817435	401637	0	0	0	0	0	0	0	237411	0	1.27518e+06	0	0	592750	1.20692e+06	0	0	0	238590	477456	0	0	0	628575	204375	1.9515e+06	1.64063e+06	275420	3.0717e+06	83235.3	5.80062e+06	0	0	799508	815668
P12004	Proliferating cell nuclear antigen	PCNA	3.78e-05	6.19278e+06	5.70467e+06	2.10888e+07	6.20832e+06	8.3569e+07	1.12992e+07	3.23005e+07	2.20756e+07	2.15279e+07	8.28358e+06	1.8614e+07	5.63029e+07	2.09969e+07	2.46976e+07	2.15861e+07	1.05965e+07	1.40897e+07	2.38707e+07	1.24541e+07	8.58746e+06	1.98903e+07	2.48828e+07	1.17336e+07	1.01359e+07	1.57266e+07	1.0879e+08	1.24273e+07	1.06599e+07	1.22983e+07	13005480	1.78839e+07	3.96902e+07	1.14599e+07	1.51154e+07	8.21531e+06	3.46511e+07	5.20083e+07	9.86369e+07	7.14895e+07	1.56654e+08	9.77283e+07	1.12014e+08	3.30736e+07	5.07937e+07	7.58317e+07	4.05588e+07
P12259	Coagulation factor V;Coagulation factor V heavy chain;Coagulation factor V light chain	F5	0.00754643	790185	650750	1.26688e+06	189485	965400	8.37874e+06	729349	1.35861e+06	770787	644319	3.72705e+06	4.6313e+06	3.71488e+06	2.96447e+06	32464.2	549536	322279	332822	135386	128618	579037	1.1023e+06	1.9499e+06	1.18681e+06	1.06714e+07	5.08809e+06	901674	701248	449271	190443	946661	3.25744e+06	1.28862e+06	195850	2.26883e+06	702064	8.789e+06	5.36591e+06	1.53369e+06	961376	3.2437e+06	1.25256e+07	1.85467e+06	5.61273e+06	1.65398e+06	5.15568e+06
P12429	Annexin A3	ANXA3	0.0119431	0	537741	1.51467e+06	1.03575e+07	418221	602097	2.81734e+06	0	1.36959e+06	0	143999	93884.4	227995	254717	0	2.07166e+06	5.11954e+06	679049	1.67759e+06	3.27039e+07	677308	0	128128	1.06789e+06	1.64745e+06	930362	583764	0	2.72687e+06	1.42275e+07	313103	832257	1.05145e+06	8.36145e+06	1.67501e+06	143503	236132	0	7.38689e+06	82663.7	775306	565243	268577	0	0	0
P12694	2-oxoisovalerate dehydrogenase subunit alpha, mitochondrial	BCKDHA	1.57e-06	1.80885e+07	2.12499e+07	2.40694e+07	3.74796e+07	3.5992e+07	8.80421e+06	3.8347e+07	2.54491e+07	7.43505e+06	1.00544e+07	1.59094e+07	3.67706e+07	2.10334e+07	7.00287e+06	1.55473e+07	3.65995e+07	3.48061e+07	2.57803e+07	2.66878e+07	1.83007e+07	3.29104e+07	1.55491e+07	6.34473e+07	2.34398e+07	2.21282e+07	4.12075e+07	1.60419e+07	2.97189e+07	2.36567e+07	1.35315e+07	1.3685e+07	2.68484e+07	3.52001e+06	4.12714e+07	1.20194e+07	1.85643e+07	3.56599e+07	2.99767e+07	5.26928e+06	1.31923e+07	4.21438e+07	1.57684e+07	2.44833e+07	3.65881e+07	3.98963e+07	6.77777e+06
P12931	Proto-oncogene tyrosine-protein kinase Src	SRC	0.00234434	1.42548e+06	0	559553	1.85211e+06	370178	750554	411851	0	518737	0	5.88028e+06	0	0	0	0	1.03745e+06	0	622173	930104	5.06361e+06	547566	0	153534	0	407823	0	0	0	0	654245	2.40786e+06	405016	0	0	314773	495382	0	127959	1.33602e+06	0	2.99533e+06	609400	2.73221e+06	0	357361	1.00361e+06
P13284	Gamma-interferon-inducible lysosomal thiol reductase	IFI30	0.00185691	4.40668e+07	1.06831e+07	4.17947e+06	2.77882e+06	2.46653e+06	8.74016e+06	1.54758e+06	4.87198e+07	1.71297e+06	2.57236e+07	3.24071e+08	1.1141e+07	2.43097e+07	1.00735e+07	3.46726e+07	8.07189e+06	3.17325e+07	1.60482e+06	1.43759e+07	5.24138e+07	1.57523e+07	3.75733e+06	5.18519e+06	8.89682e+06	2.56515e+07	9.33087e+06	2.42687e+07	6.49481e+06	2.30471e+06	1.03395e+07	5.71311e+07	2.91299e+07	2.14375e+07	5.395e+07	2.96471e+07	2.16327e+07	5.94087e+06	5.30514e+07	9.37526e+06	2.13271e+06	2.05414e+06	2.68916e+07	1.30165e+07	1.02735e+07	8.72312e+07	790041
P13611	Versican core protein	VCAN	4.05e-05	0	129874	1.65383e+06	708715	289920	98990.9	92821.7	349283	0	0	3.20494e+06	32768.3	110394	3.45575e+06	0	4.13595e+06	0	4.31026e+06	0	616068	0	65465.1	65640.2	0	6.32043e+06	0	4.38135e+06	396453	0	1.99671e+06	4.69183e+06	0	32762.2	198098	2.43303e+06	195006	22564.2	1.24014e+06	832666	0	181512	0	1.20071e+06	0	609584	0
P13612	Integrin alpha-4	ITGA4	9.92e-05	0	0	0	0	235385	0	0	0	300885	0	0	0	0	156598	0	407577	0	0	0	171633	0	0	0	0	142936	0	0	0	0	167373	201978	0	0	0	0	0	0	0	0	0	0	0	0	0	0	0
P13716	Delta-aminolevulinic acid dehydratase	ALAD	2.55e-08	1.82559e+08	1.49974e+08	1.35789e+08	2.0986e+08	9.90545e+07	1.09442e+08	1.1981e+08	1.61572e+08	1.41305e+08	1.46839e+08	4.13043e+07	9.27622e+07	1.95988e+08	1.18646e+08	1.01468e+08	1.34023e+08	195356758	2.30174e+08	1.59731e+08	3.46283e+07	1.88489e+08	2.36224e+08	9.28308e+07	2.89791e+08	6.15618e+07	2.15686e+08	114088287	3.97813e+07	1.77223e+08	8.87803e+07	1.09752e+08	127037271	2.21046e+07	2.67945e+08	7.39491e+07	9.18039e+07	9.78276e+07	1.46058e+08	5.11425e+07	9.89651e+07	1.15966e+08	1.26669e+08	1.27891e+08	167331398	9.07671e+07	2.31385e+08
P13796	Plastin-2	LCP1	9.13e-15	4.57747e+07	1.92271e+08	1.1718e+08	1.19739e+08	3.67198e+07	4.26364e+07	5.48462e+07	1.28449e+08	1.53466e+08	7.02696e+07	1.1425e+08	6.84406e+07	3.10858e+07	1.14524e+08	1.76049e+07	5.12248e+07	9.10474e+07	6.5461e+07	1.20528e+08	1.69906e+08	7.15176e+07	2.8993e+07	58686606	3.5221e+07	1.06755e+08	8.98187e+07	1.07576e+08	4.13447e+07	2.5535e+07	1.7411e+08	1.34711e+08	1.24273e+08	1.92569e+08	8.36782e+07	2.1663e+08	1.46059e+08	1.17752e+07	1.25472e+08	1.52223e+08	7.2905e+07	1.32666e+07	1.17019e+07	41174222	5.53658e+06	1.79742e+08	2.7928e+07
P13984	General transcription factor IIF subunit 2	GTF2F2	1.79e-05	0	196317	629375	0	0	3.67728e+06	0	1.54122e+06	0	379433	497561	741260	0	0	0	1.06583e+06	0	0	0	0	133251	0	222482	0	702761	0	359691	875606	0	1.06385e+06	585713	0	0	0	240978	0	0	1.33351e+06	0	612092	0	787959	0	0	0	249482
P14151	L-selectin	SELL	0.394387	0	166858	0	0	0	254465	0	208010	0	0	144540	0	2.46348e+08	0	0	0	0	0	8.14796e+06	0	0	0	0	0	223465	2.80464e+07	0	0	0	1.49738e+06	0	0	5.56996e+06	0	0	1.3983e+06	0	0	0	0	0	0	0	0	0	0
P14207	Folate receptor beta	FOLR2	0.00109939	3.06757e+06	1.99823e+07	9.55593e+06	2.42085e+07	2.41366e+06	3.91603e+06	3.67446e+06	3.29679e+06	2.41268e+07	3.0311e+07	7.37845e+06	2.68479e+06	1.65635e+06	3.16527e+07	0	7.19139e+06	1.77951e+07	2.0248e+06	1.50989e+07	7.3926e+06	1.21101e+07	667842	5.48278e+06	7.11425e+06	9.1848e+06	2.82953e+06	5.45662e+06	1.61589e+06	1.14411e+06	1.16466e+07	1.07138e+07	6.35931e+06	4.85624e+06	1.63448e+07	1.63247e+07	806464	286949	1.91865e+06	2.68938e+07	1.24696e+06	0	0	2.44821e+06	150870	1.99475e+06	412428
P14317	Hematopoietic lineage cell-specific protein	HCLS1	1.23e-10	1.87494e+06	3.41387e+07	2.28111e+07	1.96803e+07	3.91814e+06	7.62819e+06	5.41666e+06	1.32798e+07	2.06875e+07	2.07776e+07	2.00395e+07	3.01568e+06	3.28667e+06	2.37001e+07	395047	5.84931e+06	1.00755e+07	1.16943e+07	2.03006e+07	1.84466e+06	1.17688e+07	2.2165e+06	3.49908e+06	3.55195e+06	1.10179e+07	1.01094e+07	1.07531e+07	3.14987e+06	2.05376e+06	3.40015e+07	1.8838e+07	1.74451e+07	2.68418e+07	1.19307e+07	2.47003e+07	4.17518e+06	1.07607e+06	1.44789e+07	1.33852e+07	5.81122e+06	1.00514e+06	0	2.71493e+06	0	1.58457e+07	2.07457e+06
P14543	Nidogen-1	NID1	1.36e-05	1.85062e+06	908178	5.26218e+06	2.74357e+06	2.98731e+06	1.59716e+07	1.12036e+07	3.01182e+06	767021	3.72416e+06	7.66458e+06	7.36972e+06	2.29873e+06	4.13548e+06	635336	5.36027e+06	359510	6.28499e+06	420733	6.85432e+06	1.12893e+07	2.18102e+06	4.84378e+06	1.95651e+06	8.64777e+06	3.20242e+06	8.81735e+06	6.30895e+06	789478	4.40414e+06	8.46739e+06	6.33562e+06	1.06854e+06	603896	1.08865e+06	4.26015e+06	1.03301e+07	2.20085e+07	1.34919e+07	8.12545e+06	2.36105e+07	1.39632e+06	1.80978e+06	7.47428e+06	1.27476e+07	1.14498e+07
P14618	Pyruvate kinase PKM	PKM	8.78e-11	3.2658e+08	1.3325e+08	3.04728e+08	1.23516e+08	6.82873e+07	6.65461e+07	9.01734e+07	9.18163e+07	218857143	8.83028e+07	2.05056e+08	8.41318e+07	6.23585e+07	1.62353e+08	5.52334e+07	1.27059e+08	9.69301e+07	1.04963e+08	1.34424e+08	1.37683e+08	1.05118e+08	1.86911e+08	6.41442e+07	8.41658e+07	2.06686e+08	1.80763e+08	141357111	9.57659e+07	7.25554e+07	3.21977e+08	2.6631e+08	1.10993e+08	2.71252e+08	9.19365e+07	3.56681e+08	2.6989e+08	7.01228e+07	1.41434e+08	3.38716e+08	1.30163e+08	3.36732e+07	2.80437e+08	8.07966e+07	5.15177e+07	224090332	6.03797e+08
P14780	Matrix metalloproteinase-9;67 kDa matrix metalloproteinase-9;82 kDa matrix metalloproteinase-9	MMP9	0.0221045	126894	1.07625e+06	67548.5	289584	0	134612	0	0	0	72057.4	0	0	0	0	0	0	2.28779e+06	0	85073	1.09982e+07	0	0	0	0	90599.7	349275	0	0	0	0	0	201419	929025	248123	306253	0	0	0	2.39774e+06	0	0	57537.1	0	0	0	0
P14859	POU domain, class 2, transcription factor 1	POU2F1	1.64e-06	514154	0	0	0	0	738658	736745	441490	163435	0	830319	666062	0	766575	0	311903	454863	493424	0	0	208890	2.08749e+06	233442	363142	2.27751e+06	669483	311327	394877	0	0	468906	438509	216956	279069	620879	189732	2.78151e+06	6.9167e+06	3.66684e+06	2.93828e+06	3.62158e+06	2.18952e+06	171388	720414	3.51791e+06	4.11753e+06
P14920	D-amino-acid oxidase	DAO	4.5e-07	1.97499e+08	8.09856e+07	1.75976e+07	5.03484e+07	7.34905e+07	1.13568e+07	4.20364e+07	7.23495e+07	1.16299e+08	1.00799e+07	7.15893e+06	5.23976e+07	6.37503e+07	812368	2.65476e+07	1.08149e+08	1.61321e+08	1.293e+08	1.14029e+08	1.0642e+08	5.20765e+07	7.126e+07	2.97058e+06	9.89715e+07	4.52858e+06	7.74893e+07	1.11357e+08	4.91371e+07	42566089	4.38551e+07	2.14153e+07	4.4154e+07	1.66858e+07	4.74984e+07	2.95129e+07	0	102479908	1.47588e+08	0	1.55239e+07	8.05702e+07	1.87884e+07	2.28033e+07	1.53634e+07	6.82456e+07	0
P15121	Aldose reductase	AKR1B1	0.00697198	9.21973e+06	3.99458e+07	3.69239e+07	4.01272e+07	1.93239e+07	3.72322e+06	1.85755e+07	1.784e+07	3.88772e+07	1.58899e+07	1.12429e+08	2.37223e+07	3.93972e+07	5.26979e+07	2.70578e+06	2.66312e+07	3.87901e+07	1.20093e+07	3.05165e+07	1.59252e+07	1.81159e+07	1.35342e+07	7.8853e+06	1.51982e+07	27247274	1.52725e+07	2.19925e+07	7.20749e+06	1.48882e+07	6.50878e+07	1.85765e+08	2.15334e+07	6.99103e+07	3.20478e+07	6.05918e+07	2.38243e+07	9.02278e+07	2.65478e+07	2.54543e+07	2.75097e+07	5.29785e+08	333026	3.09037e+06	2.97007e+06	4.45223e+07	2.43819e+06
P15153	Ras-related C3 botulinum toxin substrate 2	RAC2	6.09e-11	3.71145e+06	2.23802e+07	3.90814e+07	2.30797e+07	5.08941e+06	2.95408e+06	1.13248e+07	1.6097e+07	2.1661e+07	1.59991e+07	1.56589e+07	7.26282e+06	1.14765e+07	4.1937e+07	0	9.3856e+06	2.32818e+07	1.25647e+07	3.68273e+07	5.57847e+07	9.68666e+06	2.60026e+06	1.19046e+07	3.48469e+06	1.16609e+07	1.07136e+07	3.76137e+07	4.71094e+06	6.0902e+06	3.03274e+07	3.73139e+07	2.0116e+07	1.85694e+07	2.04156e+07	3.10369e+07	4.38423e+07	0	1.31534e+07	3.44104e+07	7.74235e+06	0	1.95023e+06	4.38951e+06	83152.4	1.82034e+07	4.49389e+06
P15498	Proto-oncogene vav	VAV1	9.61e-09	0	762918	188362	694477	28490.3	47801.7	0	80845.7	88175.6	147389	87388.3	84249.5	27880.6	349733	0	0	277429	0	480438	559679	0	0	83151.1	0	88459.5	0	58225.7	75922.4	0	193414	178724	3.02378e+06	117092	151786	117022	341483	0	51613.8	446020	41662.7	0	0	0	0	89245.4	0
P15735	Phosphorylase b kinase gamma catalytic chain, liver/testis isoform	PHKG2	0.000242169	3.13377e+06	1.25601e+06	3.55353e+06	1.1492e+07	1.65448e+06	463529	3.17424e+06	2.08901e+06	2.59423e+06	2.94114e+06	3.68473e+06	917613	1.37552e+06	3.79909e+06	3.96977e+06	2.51407e+06	1.06909e+07	817537	7.26848e+06	1.73899e+06	3.43236e+06	3.91586e+06	3.33304e+06	3.36831e+06	828288	2.18949e+06	7.08421e+06	496407	4.0261e+06	708487	3.1159e+06	5.63496e+06	610369	6.20938e+06	807286	1.90078e+06	1.1959e+06	2.21486e+06	1.02025e+06	1.32605e+06	2.78781e+06	1.04905e+06	0	1.35293e+06	2.92567e+06	645419
P16070	CD44 antigen	CD44	4.43e-08	924935	3.45025e+06	4.15601e+06	8.67015e+06	238122	1.06835e+06	534793	9.35011e+06	3.33752e+06	600740	1.39089e+06	802448	441610	3.39339e+06	147138	2.05292e+06	2.2325e+06	939397	3.5666e+06	1.09787e+06	313970	891366	710419	0	4.80963e+06	166873	2.76519e+06	1.53595e+06	227199	1.0691e+06	9.69325e+06	507939	4.19674e+06	7.60031e+06	6.18214e+06	2.44158e+06	234522	707052	931484	0	0	116990	606023	0	5.55788e+06	107717
P16220	Cyclic AMP-responsive element-binding protein 1	CREB1	4e-05	8.53624e+06	2.82632e+06	3.1569e+06	0	2.03892e+06	1.03012e+07	0	0	3.26535e+06	0	5.94545e+06	668527	0	0	0	2.1621e+06	0	3.80846e+06	0	0	0	0	5.38906e+06	0	3.63856e+06	1.41563e+06	1.66173e+06	0	0	0	3.52692e+06	0	0	0	3.45512e+06	0	5.53422e+06	1.64606e+07	5.817e+06	3.58027e+06	1.41815e+07	2.58135e+06	8.00835e+06	0	7.713e+06	4.06952e+06
P16298	Serine/threonine-protein phosphatase 2B catalytic subunit beta isoform	PPP3CB	6.06e-06	605080	451801	407116	806643	137364	83050.7	192969	650179	0	506125	286924	330325	0	318790	82252.3	150219	398720	770725	213622	272951	429183	773774	30079.4	0	228072	185468	0	406019	0	176285	334866	428566	477854	156613	692785	628983	101840	0	206709	177803	283716	3.86926e+06	113613	515839	645414	1.34389e+06
P16402	Histone H1.3	HIST1H1D	6.23e-06	0	672431	0	2.05931e+06	0	822016	0	895431	0	613605	451393	0	0	1.29789e+06	0	503061	383401	0	0	568856	765004	0	895011	0	0	0	2.43541e+06	0	0	842949	1.74045e+06	0	0	1.08376e+06	0	6.40112e+06	0	2.67626e+06	844192	0	0	0	1.20996e+06	0	0	0
P16662	UDP-glucuronosyltransferase 2B7	UGT2B7	7.51e-07	2.52016e+08	3.23851e+08	2.92587e+08	8.72884e+08	4.42354e+08	1.55888e+08	6.23837e+08	4.09177e+08	7.26805e+07	1.37742e+08	1.80408e+08	8.67718e+08	1.60643e+08	7.02539e+07	3.19626e+08	2.4784e+08	4.5464e+08	3.88147e+08	766512271	1366194789	2.32832e+08	2.32137e+08	2.86849e+08	3.79933e+08	1.96041e+08	3.02551e+08	2.87174e+08	377864040	1.81247e+08	2.35643e+07	4.03057e+08	3.11749e+08	3.12363e+07	6.62693e+08	3.18974e+08	2.12572e+08	2.3462e+08	8.67817e+07	9.70803e+06	130506379	1.81102e+08	1.22567e+08	6.39436e+07	6.55715e+07	4.54874e+08	7.44171e+07
P16671	Platelet glycoprotein 4	CD36	0.0444587	371625	4.61149e+06	2.80035e+06	2.82471e+07	8.68789e+06	1.00411e+07	1.49981e+07	8.1244e+06	4.61736e+06	4.15567e+06	488494	4.57198e+06	8.29336e+06	1.47056e+06	0	2.90178e+06	6.76822e+06	3.70584e+06	1.13168e+07	2.87215e+06	6.00465e+06	862206	6.06401e+06	3.69104e+06	8.14109e+06	4.03494e+06	8.16779e+06	1.17459e+06	3.10449e+06	4.20992e+06	4.25271e+06	933731	576599	7.11856e+06	2.33132e+06	1.03084e+07	4.86703e+06	1.53489e+07	1.59111e+06	1.88924e+06	3.65301e+06	7.02509e+06	2.63031e+06	5.5718e+06	5.05345e+06	1.33735e+07
P16885	1-phosphatidylinositol 4,5-bisphosphate phosphodiesterase gamma-2	PLCG2	0.00078324	280651	1.25906e+06	147997	661605	0	690227	100480	0	2.30753e+06	1.2942e+06	3.00339e+06	109342	52868.5	981693	347836	5.12103e+06	1.15374e+06	1.07504e+06	583080	1.62232e+06	142933	98069.7	202121	390305	1.08582e+06	2.76734e+06	1.8458e+06	1.7575e+06	88933.2	1.72077e+06	3.66514e+06	358272	267184	375969	870295	379273	0	2.12505e+06	1.48905e+06	270167	0	0	49608.6	22687.3	248919	276979
P16930	Fumarylacetoacetase	FAH	1.56e-06	1.81221e+08	344072364	1.84753e+08	2.8665e+08	2.82837e+08	8.51128e+07	2.88415e+08	2.19271e+08	7.19204e+07	2.07032e+08	3.48048e+08	197429824	2.18387e+08	1.90715e+08	3.098e+08	3.50642e+08	4.80561e+08	4.17428e+08	4.41415e+08	3.30891e+08	3.54469e+08	9.10854e+07	1.63985e+08	1.37001e+08	1.27509e+08	2.95313e+08	2.3802e+08	1.7959e+08	1.89267e+08	1.24917e+08	4.26067e+08	2.29121e+08	1.26587e+08	2.85925e+08	1.80923e+08	1.12934e+08	2.38703e+08	324047035	2.3475e+08	1.482e+08	1.29478e+08	136287054	7.42064e+07	3.72722e+07	9.58051e+07	1.41314e+08
P16949	Stathmin	STMN1	0.000477097	8.84927e+06	1.59329e+06	1.55044e+06	926476	1.679e+07	1.50188e+07	1.81065e+07	727827	1.72948e+06	1.28392e+06	2.44737e+07	2.32262e+06	8.86345e+06	3.46672e+06	3.49466e+06	1.2498e+07	0	6.34977e+06	1.72308e+06	2.35243e+06	1.82532e+07	2.52688e+07	2.56096e+06	4.10676e+06	1.00995e+07	9.26304e+06	0	1.65268e+06	2.21504e+06	0	4.87879e+06	2.93022e+06	1.51043e+06	2.32301e+06	1.61615e+06	1.45298e+06	5.09603e+06	1.77064e+07	7.43663e+06	3.20526e+07	9.75156e+07	2.13166e+07	6.61385e+06	5.9556e+06	4.19034e+07	4.53058e+06
P16989	Y-box-binding protein 3	YBX3	0.00757612	545542	0	429124	1.28761e+06	0	1.2212e+06	323090	329679	921465	7.92353e+06	835734	413268	0	5.26025e+06	0	1278620	0	582720	122795	0	0	0	5.11346e+06	366626	1.76838e+06	214771	0	2.07344e+06	0	5.02531e+06	2.37726e+06	831304	2.69039e+06	1.43825e+06	2.88672e+06	962050	0	213689	5.0923e+06	880076	0	204226	590208	397572	348674	2.54724e+06
P17301	Integrin alpha-2	ITGA2	1.78e-05	6.25838e+06	630317	1.80323e+06	2.2649e+06	0	131588	0	482202	1.26533e+06	1.05018e+06	2.32566e+06	1.64684e+06	0	1.13619e+06	0	124796	0	0	0	1.79294e+06	1.00141e+06	1.93091e+06	0	1.12663e+06	3.66509e+06	0	1.70442e+06	1.17616e+06	0	2.38774e+06	2.33279e+06	2.24347e+06	2.19226e+06	1.952e+06	3.57735e+06	0	280312	471559	5.86793e+06	830826	1.07362e+06	2.66605e+06	1.06782e+07	7.59214e+06	0	2.96648e+06
P17516	Aldo-keto reductase family 1 member C4	AKR1C4	0.000981881	1.41904e+08	334281568	3.22736e+08	6.23387e+08	1.49725e+08	234901100	289798147	8.58115e+08	1.45941e+08	4.04859e+08	4.5393e+08	3.92667e+08	9.163e+08	1.20456e+08	2.34175e+08	1.48317e+08	3.40853e+08	1.48171e+08	6.91008e+08	4.84956e+08	1.64859e+08	3.00483e+08	7.11303e+08	4.6522e+08	1062382202	3.37531e+08	1.88709e+08	5.47021e+08	5.77413e+08	2.59283e+08	6.59835e+08	2.42757e+08	4.03635e+08	4.53791e+08	3.22207e+08	3.99618e+08	3.20274e+08	3.57198e+08	100437762	125321448	2.03396e+07	9.31607e+07	1.61969e+08	1.31083e+08	842351172	4.27267e+08
P17735	Tyrosine aminotransferase	TAT	0.00170214	0	2.80135e+07	2.11183e+07	1.49838e+07	1.45526e+07	1.77994e+06	119152979	550902	1.42944e+06	867069	8.29918e+07	2.35074e+07	4.39074e+07	228469	1.14859e+08	5.21436e+06	1.02719e+07	6.81158e+06	6.10133e+06	5.19e+06	315455	8.14738e+07	8.8385e+06	5.85513e+06	1.1795e+07	5.20794e+07	1.61936e+06	3.33948e+07	1.09345e+07	1.33805e+06	5.65227e+06	3.79386e+06	4.31778e+06	5.09693e+06	5.13196e+06	2.33121e+06	6.15232e+06	2.54543e+07	86032.3	1.22389e+07	1.19228e+07	0	0	0	2.26278e+07	0
P17813	Endoglin	ENG	1.36e-09	285027	3.61696e+06	6.14727e+06	7.22112e+06	2.60866e+06	2.04049e+06	1.17346e+06	800398	8.01773e+06	3.10715e+06	5.38224e+06	273634	204791	5.9823e+06	0	3.70995e+06	3.10886e+06	5.70301e+06	4.29034e+06	736023	0	139803	350599	705746	5.6536e+06	433753	873665	976040	1.53732e+06	1.45674e+07	4.68726e+06	1.80062e+06	1.12161e+06	2.21858e+06	4.97124e+06	2.5201e+06	0	226273	0	0	957107	98782.5	951708	237578	447433	0
P17931	Galectin-3	LGALS3	8.16e-05	5.00277e+06	5.57284e+06	1.74821e+06	1.32859e+07	7.99733e+06	1.93817e+07	4.95873e+06	5.97812e+06	1.57008e+07	1.44903e+06	3.0268e+07	1.07082e+07	1.7077e+07	6.19483e+07	1.79593e+06	5.07026e+07	9.09089e+06	2.38009e+08	974861	4.27415e+06	9.19783e+07	1.84188e+07	1.81757e+06	1.82875e+06	6.68464e+06	4.59547e+06	8.80913e+07	8.76432e+06	0	6.25014e+06	2.48146e+07	3.64938e+06	108214706	4.49686e+06	1.76175e+07	1.41686e+06	1.67708e+06	5.40802e+06	1.6568e+07	8.04829e+06	1.74343e+07	454746	1.71896e+07	0	1.82744e+07	1.19498e+08
P17936	Insulin-like growth factor-binding protein 3	IGFBP3	6.6e-05	0	0	70266	204907	0	0	0	0	0	0	0	0	0	109814	0	298613	0	0	0	0	0	0	0	0	0	0	26773.1	0	0	1.57992e+06	0	0	0	241148	0	0	0	0	742287	0	0	0	0	0	0	2.20166e+06
P18074	TFIIH basal transcription factor complex helicase XPD subunit	ERCC2	1.12e-05	562209	422685	46547.7	0	0	0	0	315923	0	133013	639244	94377.7	37041.1	91188.6	0	0	195341	0	0	908067	0	169836	0	0	339080	362064	0	337817	0	0	495917	292729	0	0	791927	0	817415	1.41077e+06	1.05704e+06	651600	64040.7	846792	0	474562	646571	941563
P18084	Integrin beta-5	ITGB5	1.6e-12	0	1.99028e+06	1.85559e+06	1.29232e+06	618950	367652	455139	511174	1.59412e+06	1.41317e+06	897305	868625	234261	3.18624e+06	0	1.35551e+06	1.19273e+06	448504	787462	1.79721e+06	501516	777637	676735	78539.9	3.28146e+06	887658	1.64592e+06	1.10867e+06	390955	5.23471e+06	2.17909e+06	847339	1.6046e+06	3.24792e+06	3.17315e+06	1.43494e+06	1.40797e+06	303246	2.22536e+06	696185	0	3.85745e+06	357246	256439	1.19502e+06	1.44388e+06
P18510	Interleukin-1 receptor antagonist protein	IL1RN	0.0107081	0	0	548761	0	0	613851	0	1.15102e+06	0	0	0	0	0	0	0	400860	1.94509e+06	749388	0	0	1.06728e+06	2.86843e+06	0	1.05738e+06	564377	7.08689e+06	0	0	645121	0	387516	1.12106e+06	0	0	0	525825	0	3.14072e+06	0	359361	433557	651654	0	329448	5.43934e+06	7.00273e+06
P18615	Negative elongation factor E	NELFE	1.31e-06	1.25898e+06	1.7641e+06	220092	0	871846	418199	0	221457	734904	808449	819233	1.46208e+06	764773	384905	289910	0	1.30299e+06	184438	0	219482	0	309243	275167	513066	867343	1.02501e+06	187485	0	310011	437831	982521	288871	0	0	827348	0	2.34572e+06	2.94934e+06	2.3637e+06	2.48796e+06	6.04286e+06	3.41634e+06	331225	405479	1.91576e+06	1.64183e+06
P18858	DNA ligase 1	LIG1	0.000150063	0	0	0	0	473082	0	80072.2	28662.8	0	0	292917	496782	396525	0	0	0	58272.5	0	0	0	0	71141.8	0	0	0	383865	0	0	0	0	0	112075	0	0	0	0	394699	1.18455e+06	211547	410157	2.4325e+06	2.92383e+06	0	584086	1.1336e+06	144146
P19367	Hexokinase-1	HK1	2.55e-14	195499	834622	2.47139e+06	2.02016e+06	252057	559425	946611	1.59875e+06	1.54733e+06	153240	2.07247e+06	1.82269e+06	262858	5.60421e+06	0	2.48824e+06	186878	1.37682e+06	1.16275e+06	2.47516e+06	0	0	198334	34240.1	2.43483e+06	0	1.70025e+06	14573.8	61241.7	875225	4.0711e+06	342835	2.16998e+06	903899	2.76884e+06	4.33607e+06	0	747126	644712	109240	92805	59449.8	629071	310586	720132	0
P19878	Neutrophil cytosol factor 2	NCF2	3.22e-06	0	631087	364294	0	0	48972.4	240434	0	0	336199	618429	0	0	0	0	0	212824	0	0	1.35918e+06	0	0	200848	191797	328108	0	180342	0	0	587896	818553	251384	1.34812e+06	210640	486083	0	0	0	1.35734e+06	294963	0	93544.7	1.17699e+06	0	839053	0
P19971	Thymidine phosphorylase	TYMP	8.88e-07	6.41919e+07	1.50424e+08	1.56037e+08	3.98305e+07	1.0618e+08	4.66099e+07	1.56525e+08	7.28303e+07	1.72173e+08	2.59377e+08	5.24263e+08	1.71512e+08	105046230	2.80118e+08	5.87629e+07	1.13371e+08	2.05288e+08	1.84066e+08	2.11552e+08	1.08105e+08	3.35627e+08	6.53878e+07	4.96544e+07	8.60653e+07	7.97446e+07	6.35907e+07	114688397	2.68627e+08	5.36913e+07	1.2763e+08	9.94765e+07	191861158	2.21553e+08	7.07823e+07	2.13444e+08	7.04232e+07	5.60726e+07	4.98017e+07	1.05343e+08	6.66613e+07	6.24774e+07	2.68176e+07	4.79574e+07	2.89928e+07	2.66418e+08	5.45797e+06
P20020	Plasma membrane calcium-transporting ATPase 1	ATP2B1	2.14e-05	1.044e+06	1.52335e+06	416285	545428	1.10362e+06	809241	835190	267268	492519	677181	1.50415e+06	839910	93147.7	590875	114712	825574	2.1588e+06	785351	165662	1.21718e+06	256194	523071	329891	322046	445735	400852	609082	0	239486	790816	691701	738413	658428	912827	2.2939e+06	1.50575e+06	247204	1.55187e+06	6.34318e+06	1.30852e+06	281584	5.01081e+06	429995	863919	1.66804e+06	8.94473e+06
P20132	L-serine dehydratase/L-threonine deaminase	SDS	0.000351126	0	3.95239e+08	1.27837e+07	1.70475e+07	1.17652e+08	6.81135e+07	2.56382e+08	0	1.92884e+07	1.3156e+08	226875241	8.35737e+06	2.70406e+06	0	2.65814e+08	3.87606e+07	6.83858e+07	6.95092e+06	1.17914e+07	1.71282e+07	0	2.64804e+06	2.89153e+07	0	1.04977e+07	8.70594e+07	2.04058e+07	238728276	2.22307e+07	1.18007e+08	1.90093e+07	1.25491e+07	8.62841e+07	1.24126e+06	1.25087e+07	1.11208e+06	1.01884e+06	1.59045e+07	0	1.46187e+08	6.73556e+06	0	0	0	5.88677e+07	0
P20585	DNA mismatch repair protein Msh3	MSH3	3.14e-06	105780	57605.4	27085.6	0	495083	171832	132676	35519.5	31920.9	39365.6	841287	546415	816611	150990	0	81208.9	826486	310200	0	0	0	647084	41722.1	334932	574725	529923	272057	0	0	0	0	539530	73651.7	228413	302707	0	428325	431355	263890	2.19544e+06	1.0075e+06	36996.4	265092	180605	1.38472e+06	532725
P20591	Interferon-induced GTP-binding protein Mx1;Interferon-induced GTP-binding protein Mx1, N-terminally processed	MX1	0.157115	148372	7.76174e+06	142898881	1.24488e+06	0	698162	3.82021e+07	297236	1.9763e+06	3.72604e+07	3.80117e+06	1.25944e+06	2.36265e+06	8.1069e+06	161417	5.51904e+06	2.49772e+06	0	1.29244e+07	819294	3.0813e+07	103384	7.20111e+06	722625	665074	112850	533247	176738	1.30673e+07	8.66299e+07	2.53046e+06	1.58274e+06	261659	3.5381e+06	1.19877e+07	1.52688e+07	0	1.68259e+06	4.4539e+06	54460.9	110464	0	54343	114032	1.61034e+08	254618
P20701	Integrin alpha-L	ITGAL	4.45e-07	330357	1.22048e+06	537490	1.43432e+06	0	0	0	119434	782290	497290	429992	0	0	839933	40522.1	30463.9	956261	118058	1.13389e+06	724771	0	0	73265.6	0	275192	0	149972	92228.3	0	445505	317916	956595	889926	0	1.5005e+06	2.73451e+06	0	105881	1.29497e+06	0	32524.8	40569	0	0	882859	0
P20702	Integrin alpha-X	ITGAX	1.46e-06	485238	528316	849190	116079	0	130733	45694.2	652646	99068.2	316758	515669	384111	652393	181602	0	371842	725925	0	42272.2	554502	282756	431887	122316	82084.3	1.33237e+06	190798	1.32596e+06	73789.1	0	199203	195226	439717	5.06347e+06	330795	931380	1.42813e+06	0	224544	1.60819e+06	1.65317e+06	109398	0	0	0	867760	20553
P20813	Cytochrome P450 2B6	CYP2B6	0.000925392	1.26221e+06	1.72257e+07	1.13503e+06	6.55573e+06	1.27341e+07	0	5.20997e+06	5.60601e+06	583687	0	1.26353e+07	1.8639e+06	1.59652e+07	1.45463e+06	872325	2.64973e+07	3.42311e+06	9.92933e+06	2.46875e+07	123678	3.68417e+06	3.3419e+06	3.20069e+06	450373	3.11836e+06	2.29256e+07	9.25644e+06	3.13787e+06	1.13524e+07	0	1.41947e+06	63799.1	102865	7.38545e+06	500243	3.17292e+06	1.41212e+07	7.85955e+06	127487	0	5.40489e+06	560991	0	703275	3.1651e+06	37767.4
P20823	Hepatocyte nuclear factor 1-alpha	HNF1A	7.59e-08	322873	489100	0	0	1.21883e+06	0	1.15833e+06	176774	711213	762896	1.03538e+06	1.44417e+06	707540	275393	0	0	830580	301849	0	342706	1.86829e+06	2.71394e+06	0	784812	2.0761e+06	1.19025e+06	167117	1.00323e+06	525011	1.06014e+06	1.32526e+06	1.52192e+06	0	805009	345541	298841	2.90824e+06	4.94891e+06	2.03571e+06	3.85491e+06	3.99503e+06	1.14646e+06	0	1.23461e+06	3.75387e+06	2.35186e+06
P20839	Inosine-5-monophosphate dehydrogenase 1	IMPDH1	6.48e-06	0	92249.2	93021.6	175773	0	0	0	0	0	0	0	0	0	295373	0	0	0	0	0	0	0	0	0	0	141056	0	224476	0	0	0	0	305507	0	0	158965	0	0	0	1.88251e+06	0	0	0	0	0	0	0
P20936	Ras GTPase-activating protein 1	RASA1	5.68e-06	339211	434391	0	0	237305	0	208810	94343.9	0	192353	487901	712337	120320	229605	0	114596	440550	0	0	316855	0	182753	317539	351743	0	220528	178494	235812	36489.7	0	577600	136137	284684	99783.5	1.76096e+06	0	639019	739360	474045	70535.3	328622	62352	217795	77124.5	184852	2.00217e+06
P21333	Filamin-A	FLNA	4.07e-10	2.74814e+07	1.05036e+08	271747721	2.48875e+08	5.80157e+07	4.47371e+07	6.96591e+07	3.68099e+07	1.22785e+08	5.04113e+07	9.91162e+07	3.27679e+07	4.35766e+07	1.73789e+08	2.20526e+07	5.32082e+07	4.10721e+07	8.02037e+07	9.50766e+07	6.65871e+07	3.27661e+07	7.4566e+07	2.08205e+07	3.35612e+07	220921164	8.05954e+07	6.8853e+07	6.48192e+07	4.39789e+07	3.55799e+08	2.17096e+08	4.58385e+07	6.39998e+07	1.30084e+08	2.60806e+08	4.39196e+07	1.50692e+07	1.37102e+08	3.18579e+07	5.57866e+07	2.42528e+07	1.52874e+07	3.50314e+07	6.20197e+07	5.38057e+07	2.21035e+07
P21397	Amine oxidase [flavin-containing] A	MAOA	0.000791268	7.43505e+07	7.63209e+07	1.04601e+08	1.28206e+08	1.52121e+08	9.16933e+07	7.18807e+07	6.38752e+07	1.18095e+08	6.4384e+07	5.06072e+07	8.74181e+07	4.13151e+07	4.78388e+07	8.99431e+07	7.58833e+07	5.14647e+07	5.02456e+07	6.0547e+07	1.2785e+08	1.17734e+08	1.14382e+08	1.86729e+08	7.15017e+07	5.45327e+07	1.78549e+08	5.92669e+07	1.38962e+08	8.68717e+07	7.09159e+07	2.00027e+08	4.44965e+07	1.69761e+07	1.48057e+08	3.66374e+07	3.29286e+08	1.31264e+08	9.99746e+07	3.38762e+07	1.04954e+08	3.92557e+07	124848659	1.26248e+08	2.26567e+08	1.30723e+08	1.12252e+07
P21399	Cytoplasmic aconitate hydratase	ACO1	8.65e-06	5.8091e+07	3.85946e+08	1.30395e+08	2.03351e+08	3.20863e+08	1.12077e+08	5.28914e+08	1.88921e+08	4.52498e+08	1.54901e+08	1.36209e+08	132023743	2.05518e+08	175915495	2.58722e+08	3.92693e+08	3.58849e+08	2.83892e+08	3.73664e+08	1.02034e+08	1.81224e+08	231192166	1.18961e+08	1.75406e+08	1.79378e+08	4.11484e+08	2.77608e+08	1.77814e+08	2.18505e+08	2.67032e+08	2.46837e+08	2.04866e+08	1.82213e+08	2.11691e+08	218291119	8.75474e+08	1.07643e+08	2.90783e+08	2.47942e+08	4.0767e+08	2.21807e+08	1.18583e+08	4.47936e+07	1.15386e+08	5.08217e+08	2.27886e+08
P21439	Multidrug resistance protein 3	ABCB4	0.00971211	163342	3.30479e+06	178153	105328	4.51458e+06	1.45448e+06	597709	3.0519e+06	1.21061e+06	73870.3	74040.9	954125	5.32551e+06	159774	295505	2.152e+06	3.15763e+06	1.43237e+06	1.07847e+06	105714	1.32647e+06	1.2721e+06	36048.5	929697	757329	116125	4.55807e+06	2.01526e+06	153114	115707	823139	815427	1.51956e+06	269690	38308	141127	2.59505e+06	1.17705e+06	16514.3	154023	1.29863e+06	186965	919664	224960	1.20162e+06	0
P21549	Serine--pyruvate aminotransferase	AGXT	2.38e-06	7.14258e+08	2562293484	9.51661e+08	1078963912	1904810564	6.52221e+08	1771134351	1498209780	1735627728	2020451589	2146379189	1885264731	1550294292	1099266146	1511912175	5.03491e+08	1337820782	2219363559	1284119845	3844912552	1072621212	1476363758	1199093608	1001532755	1513293320	1402744518	1359935451	1123403340	1187685966	7.41163e+08	1202945170	2336143471	1628512787	1591952577	1778868921	1130252898	1608304796	2661182842	5.36757e+08	1446564083	2376030118	1420863368	1541830630	7.37167e+08	3320531031	9.07084e+08
P21695	Glycerol-3-phosphate dehydrogenase [NAD(+)], cytoplasmic	GPD1	2.02e-07	2.0967e+08	3.19011e+08	1.00133e+08	2.52484e+08	1.33559e+08	1.11552e+08	1.35335e+08	2.25899e+08	3.25402e+08	1.94525e+07	3.37031e+08	6.42884e+07	2.01907e+08	7.69025e+07	3.88823e+08	1.07322e+08	398133424	6.06279e+08	3.76139e+08	1.50123e+08	5.49778e+08	4.47862e+07	1.25776e+08	3.11577e+08	3.30449e+07	1.77175e+07	3.37067e+08	8.81453e+07	2.21555e+08	1.07616e+08	1.19469e+08	1.19988e+08	3.90654e+06	2.33033e+08	5.91022e+07	8.51914e+07	6.02548e+07	72693.8	5.73806e+06	2.05581e+06	2.14849e+07	8.38709e+07	1.48298e+07	7.09476e+06	8.88993e+06	9.64287e+06
P21757	Macrophage scavenger receptor types I and II	MSR1	2.27e-07	490079	405710	442381	260730	290364	252013	362814	130075	363749	120061	726120	556752	109535	757378	0	0	479001	111958	479067	294139	0	331968	154453	78212.9	552126	0	257277	0	78117.4	412891	728589	338856	212532	72068.1	596361	828603	0	39083.3	225009	127640	160877	0	280612	0	79755.3	0
P21810	Biglycan	BGN	1.8e-08	0	1.75042e+07	4.2273e+07	5.05752e+07	1.69575e+06	9.98464e+06	1.22697e+06	5.95427e+06	5.75486e+06	1.15439e+06	2.48995e+07	135019	7.49576e+06	8.03623e+07	0	5.08099e+07	202406	4.37506e+07	3.08467e+06	229881	1.05644e+07	9.01332e+06	3.14558e+07	506236	7.73415e+07	315829	9.98714e+06	9.04988e+06	2.97886e+06	2.6471e+07	7.74754e+07	0	2.50099e+06	3.3626e+07	1.08158e+08	0	0	1.14786e+07	3.04225e+06	224345	3.79324e+06	0	4.2547e+06	0	1.1409e+07	127325
P21953	2-oxoisovalerate dehydrogenase subunit beta, mitochondrial	BCKDHB	8.95e-05	9.68459e+06	3.84728e+07	2.25648e+07	2.541e+07	3.31326e+07	9.2786e+06	3.43758e+07	2.0851e+07	4.72757e+06	7.53307e+06	9.39182e+06	1.79201e+07	2.60993e+07	9.86079e+06	1.37584e+07	3.32862e+07	3.04338e+07	1.81518e+07	2.41342e+07	1.10432e+07	2.16984e+07	1.37095e+07	6.04339e+07	1.91283e+07	2.67406e+07	4.40325e+07	8.88424e+06	1.2042e+07	1.61159e+07	4.17005e+06	8.77671e+06	2.19268e+07	4.17097e+06	4.0055e+07	1.02979e+07	2.02743e+07	5.83663e+07	1.58675e+07	8.33928e+06	1.13898e+07	2.47319e+07	1.70881e+07	2.46074e+07	2.35014e+07	4.57862e+07	8.90016e+06
P22033	Methylmalonyl-CoA mutase, mitochondrial	MUT	6.87e-06	2.30968e+07	9.59455e+07	6.48291e+07	1.19406e+08	1.65068e+08	4.65332e+07	8.42391e+07	7.91338e+07	6.79623e+07	1.86498e+08	9.3302e+07	5.8541e+07	1.08568e+08	9.01254e+07	6.8961e+07	8.02922e+07	9.21458e+07	7.74496e+07	9.55462e+07	7.84917e+07	7.65579e+07	9.44902e+07	8.16118e+07	36403872	8.47346e+07	2.19944e+08	6.17458e+07	8.41219e+07	1.03459e+08	5.26134e+07	6.55169e+07	1.05939e+08	3.68604e+07	8.8089e+07	5.95805e+07	1.05328e+08	6.75997e+07	1.78992e+08	6.22442e+07	1.23609e+08	1.05349e+08	2.29048e+07	6.9062e+07	7.30672e+07	2.13e+08	1.07031e+08
P22105	Tenascin-X	TNXB	0.206378	0	1.16088e+06	1.42134e+06	1.03866e+07	1.33709e+06	231889	86922.2	377071	1.07058e+06	178327	2.42351e+06	69186.2	235512	1.93693e+06	27284.3	1.96374e+06	1.24331e+06	1.15733e+06	4.0325e+06	1.32341e+06	265114	16811	1.21717e+06	0	1.13005e+06	76922.7	1.00679e+06	214067	118926	1.38156e+06	3.5408e+06	0	0	9.387e+06	2.38408e+06	49931.9	0	244847	0	0	99875.4	0	99485.8	0	454184	0
P22307	Non-specific lipid-transfer protein	SCP2	1.67e-06	3.9025e+08	5.51149e+08	4.24406e+08	3.25457e+08	3.22466e+08	1822996108	7.19317e+08	558488061	5.46223e+08	5.62836e+08	6.13588e+08	409319242	3.36774e+08	2.59313e+08	429161848	9.1104e+08	2.94768e+08	6.01494e+08	4.15135e+08	3.81914e+08	326087355	992676497	6.90401e+08	5.60695e+08	3.38477e+08	1.57856e+08	6.88446e+08	2.37736e+08	429013143	8.4721e+07	4.2848e+08	1.54274e+08	2.02473e+08	4.03351e+08	1.70611e+08	4.35904e+07	4.86048e+08	8.16146e+08	8.80102e+07	2.35801e+08	6.94327e+08	1.63021e+08	2.9012e+08	1.30713e+08	7.07711e+08	4.16456e+07
P22309	UDP-glucuronosyltransferase 1-1	UGT1A1	0.128576	4.27249e+07	1.48481e+07	6.68382e+07	6.56999e+07	1.30735e+07	7.58825e+07	0	1.31002e+08	8.07822e+06	3.16319e+08	8.39136e+06	8.64128e+07	1.20114e+08	6.6468e+07	7.12436e+07	5.15325e+07	2.47352e+07	4.94624e+07	1.90545e+08	2.29264e+07	6.05564e+07	2.20429e+06	1.4401e+08	1.23905e+08	7.55896e+07	9.67976e+06	5.97677e+07	8.71272e+07	4.17254e+07	2.787e+06	3.27458e+07	2.72168e+07	6.71336e+07	9.2601e+07	1.03923e+08	1.12114e+08	2.36523e+06	118586	9.83608e+06	6.0678e+06	601938	1.86831e+06	1.71344e+08	48488393	3.46731e+07	2.29376e+07
P22310	UDP-glucuronosyltransferase 1-4	UGT1A4	2.06e-05	2.44868e+08	4.37075e+07	307746968	1.02291e+08	1.08149e+08	2.03463e+08	0	2.45101e+08	2.96889e+07	7.4223e+07	2.90273e+07	1.75372e+08	695798012	6.81233e+07	1.33501e+08	1.38303e+08	1.48242e+08	3.62305e+07	1.32482e+08	1.40499e+08	115816124	8.7463e+06	1.25125e+08	4.03164e+08	1.88911e+08	2.88487e+07	8.50903e+07	2.27906e+08	2.71073e+08	9.84394e+06	1.18875e+08	8.25568e+07	4.03133e+07	3.10403e+08	5.67391e+07	1.45208e+08	1.5372e+07	1.72906e+07	1.2648e+07	6.1284e+06	8.11129e+06	6.70308e+06	1.17603e+08	4.45947e+08	4.66818e+07	6.28105e+06
P22352	Glutathione peroxidase 3	GPX3	4.59e-06	3.63312e+06	2.17441e+07	3.21905e+07	4.73617e+07	1.5467e+07	9.66907e+06	8.42459e+06	1.11504e+07	2.37542e+07	9.77154e+06	2.54912e+07	2.66198e+06	2.74564e+06	4.94543e+07	650113	1.39831e+07	9.59546e+06	1.83056e+07	1.63274e+07	1.25039e+07	1.65831e+06	1.05814e+07	974164	8.0988e+06	2.70951e+07	1.60954e+07	9.0326e+06	9.89698e+06	2.83002e+06	36528207	2.66133e+07	1.92064e+06	1.64254e+07	1.28385e+07	4.02984e+07	4.28013e+06	1.58695e+06	1.89395e+07	2.51301e+06	825098	1.04342e+06	306895	5.34065e+06	0	2.43834e+06	659621
P22570	NADPH:adrenodoxin oxidoreductase, mitochondrial	FDXR	0.00218003	7.12128e+07	8.2743e+06	2.80961e+07	1.46449e+07	4.98334e+07	2.83245e+07	5.22953e+07	4.60632e+07	1.34312e+07	8.87148e+06	1.3181e+07	5.2995e+07	5.63596e+07	1.27305e+07	2.43484e+07	6.44458e+07	1.63517e+07	2.87595e+07	3.23187e+07	9.01093e+06	1.99553e+07	5.0244e+07	3.45052e+07	16063544	3.38552e+07	2.97974e+07	1.93755e+07	2.28104e+07	4.03156e+07	8.93461e+06	1.97971e+07	1.02154e+07	2.61857e+07	2.72515e+07	1.97102e+07	5.60306e+06	4.34866e+07	1.58255e+07	2.30158e+07	2.64493e+07	4.38215e+07	2.38429e+07	1.63874e+07	2.94769e+07	1.06884e+08	1.1652e+07
P22681	E3 ubiquitin-protein ligase CBL	CBL	3.92e-08	68790.1	129030	79589.8	58312.3	0	0	0	39327	70369.9	87806.8	64295.6	0	0	153339	0	0	72930.4	92290.4	69270.9	645342	168264	66773.1	64537.3	0	0	82439.5	102079	79123.8	0	99600.3	84479.2	145812	76531	0	182452	201908	0	173751	0	0	0	0	35367.6	0	0	398451
P22760	Arylacetamide deacetylase	AADAC	0.00157747	1.23315e+08	8.49472e+07	1.30018e+08	1.43988e+08	1.34332e+08	1.07611e+08	141706717	1.34767e+08	1.3772e+08	1.40066e+08	2.26053e+08	158546387	3.44912e+08	8.42696e+07	1.77929e+08	2.03269e+08	2.08274e+08	1.49026e+08	1.31338e+08	1.5205e+08	1.30407e+08	9.15132e+07	1.47721e+08	1.81108e+08	9.80575e+07	9.08551e+07	1.19416e+08	3.11065e+08	1.3494e+08	5.73694e+07	8.95117e+07	1.64791e+08	5.27512e+07	1.75036e+08	1.38913e+08	7.85361e+07	2.23633e+08	1.12008e+08	6.64451e+07	1.05432e+08	7.17609e+07	2.16477e+08	6.57476e+07	2.56665e+08	8.38159e+07	6.13537e+07
P23141	Liver carboxylesterase 1	CES1	5.69e-08	3708816226	2318389371	2989988867	2107717286	9.04136e+08	2705949273	1534412788	4461969126	1388695179	1256457264	4105246117	3940643683	9449553354	1119806299	3632276730	2088685781	2321420252	2429558594	2313238324	2509974856	1239401917	2163018764	3012955863	3321596064	2782852626	8.43806e+08	3194088625	2799247863	2476355949	1796153392	4151271110	2056087982	3335818342	2796582598	1506232259	1415564417	8.9019e+08	1781445788	7.76036e+08	2899472450	8.69091e+08	2114807182	3766117748	2801460083	1202590003	5.5439e+08
P23219	Prostaglandin G/H synthase 1	PTGS1	0.000571992	0	202631	0	456899	0	0	0	0	0	0	283274	0	0	0	0	1.45374e+06	303345	0	569745	0	0	0	0	0	0	0	0	0	0	0	527810	0	0	1.41586e+06	305309	0	0	0	0	0	0	0	0	0	0	0
P23378	Glycine dehydrogenase (decarboxylating), mitochondrial	GLDC	0.0177323	2.78905e+06	7.56194e+07	9.82996e+06	152945538	5.09813e+07	4.78146e+06	9.66741e+07	7.61533e+06	1.42889e+07	1.266e+07	6.40928e+07	3.61309e+07	9.88587e+06	1.53783e+07	6.4759e+07	1.04086e+07	5.71377e+07	2.59813e+07	6.48424e+07	8.75737e+06	7.60241e+07	2.39662e+07	1.77589e+07	1.10905e+06	8.08415e+06	7.39098e+07	3.11138e+08	5.51998e+07	1.52455e+08	22858034	3.56215e+07	6.86109e+07	2.30208e+07	1.2713e+08	6.26405e+07	1.54853e+07	5.82374e+07	1.16212e+07	4.75381e+06	2.71407e+07	7.07041e+06	1.06618e+07	2.47908e+06	1.70437e+06	1.38734e+08	3.83514e+07
P23469	Receptor-type tyrosine-protein phosphatase epsilon	PTPRE	1.62e-06	0	303459	128499	0	0	0	0	0	0	277355	123520	0	0	333950	0	0	0	0	0	375190	0	0	0	0	144009	0	318182	211214	0	39627.3	143817	38913.8	57696	0	434060	186701	0	0	444917	177116	0	0	538189	0	782429	0
P23743	Diacylglycerol kinase alpha	DGKA	3.55e-07	121651	99655.6	585426	736142	0	43521	0	86279.5	512334	79366.2	143475	0	0	674777	0	0	100265	0	300823	83618.2	0	0	0	0	431814	0	218651	165162	0	121017	323599	0	66481.8	198861	901580	1.13236e+06	0	61683.9	147752	64577.3	0	248492	0	0	434077	0
P23921	Ribonucleoside-diphosphate reductase large subunit	RRM1	0.0208761	0	203014	0	0	53236.4	0	43489.5	94623.8	323421	130146	534330	740308	0	317933	0	452764	53015.8	102427	190668	178537	0	97537.8	0	43025.9	143185	803754	54973.3	47543.5	25704.9	1.40378e+07	592304	216660	268063	0	238529	755477	246017	5.22256e+06	1.39111e+06	1.16826e+06	232842	991697	0	284358	324903	1.82323e+06
P24043	Laminin subunit alpha-2	LAMA2	0.00384221	55694.6	0	11492.2	3846.67	0	0	0	228324	0	0	752195	0	0	356225	366955	348136	0	201746	24939.5	68749.5	0	0	0	0	142670	0	1.36728e+06	0	0	47729.6	66116	0	762447	16334.7	22671.8	0	0	67822.8	0	0	0	46884.5	0	0	934240	309797
P24298	Alanine aminotransferase 1	GPT	4.77e-06	3.73282e+07	1.43644e+08	7.66169e+07	2.04088e+08	6.15857e+07	1.41749e+08	7.98552e+08	3.87925e+07	4.112e+07	1.22772e+08	2.58598e+08	2.36137e+07	4.45115e+07	1.42082e+08	1.48724e+08	4.15523e+08	3.5663e+08	3.83634e+07	2.45562e+08	1.67062e+08	4.41237e+07	2.13153e+08	1.14079e+08	8.33499e+07	6.34114e+07	4.21462e+08	6.28166e+07	1.26796e+08	1.96106e+08	2.47828e+07	3.65946e+07	1.36031e+07	4.78766e+07	2.84521e+08	8.73665e+07	3.81104e+08	5.98571e+06	1.77554e+07	5.5687e+07	6.42228e+07	9.88436e+07	2.05825e+07	204040	4.27722e+07	1.66376e+08	1.07544e+07
P24557	Thromboxane-A synthase	TBXAS1	4.51e-10	146953	2.23811e+06	1.08526e+06	2.876e+06	1.07197e+06	1.10997e+06	777405	876214	3.49514e+06	2.23444e+06	1.27428e+06	729370	898005	2.4295e+06	136994	1.05317e+06	2.44201e+06	385659	1.83614e+06	1.17652e+06	3.26055e+06	163993	1.33197e+06	0	1.43679e+06	773981	158647	617838	672592	2.3165e+06	2.80702e+06	1.57228e+06	2.02008e+06	1.60983e+06	2.23714e+06	479599	119131	436332	846172	814614	0	0	443442	0	1.49253e+06	56135.5
P24821	Tenascin	TNC	0.00821308	445937	9.10312e+06	319004	3.29842e+06	45288	419279	906912	461335	1.62175e+06	369417	968077	65824.7	328209	0	263505	1.95484e+06	1.41111e+06	511684	3.68947e+06	8.62339e+06	92039.1	0	366832	0	878215	0	435628	0	0	143261	2.0173e+06	0	25423.6	923195	61704	520368	119420	643606	873181	0	80039.4	0	201489	23028.8	2.81087e+06	0
P24928	DNA-directed RNA polymerase II subunit RPB1	POLR2A	0.000381486	104570	187041	44383.7	1.07445e+06	388863	288846	1.12644e+06	201468	142176	372016	1.16534e+06	150788	371895	511954	82588.8	721151	1.34813e+06	257480	13498.8	59792.1	890731	687454	209285	258791	904044	2.67544e+06	322576	15870.2	193857	558989	498973	79366.8	0	370691	183797	136791	229032	467370	912370	1.44191e+06	1.93796e+06	531897	388250	239946	1.79472e+06	775148
P24941	Cyclin-dependent kinase 2	CDK2	0.00140225	164763	0	1.19362e+06	314186	2.58112e+06	1.23696e+06	6.81783e+06	1.2611e+06	163744	0	1.28635e+06	286384	205793	735330	0	0	0	324652	2.03501e+06	611124	258885	2.85857e+06	1.03107e+06	766953	0	1.79201e+06	0	0	0	0	941405	0	556707	316941	132962	1.01709e+06	858991	1.54682e+06	1.2085e+06	3.18459e+06	1.78291e+06	7.99497e+06	489405	2.36133e+06	4.39967e+06	1.23392e+06
P25098	Beta-adrenergic receptor kinase 1	ADRBK1	7.33e-08	331458	2.19211e+06	1.27263e+06	1.10068e+06	247936	351854	486117	623118	850539	1.54365e+06	683282	160896	263257	2.08717e+06	259694	409775	2.67039e+06	659936	1.13832e+06	1.60251e+06	433574	724283	86631.9	552216	416299	273719	1.24954e+06	460436	418549	1.49533e+06	1.58161e+06	1.63204e+06	1.29173e+06	738170	1.55698e+06	1.00621e+06	1.41152e+06	800666	2.02351e+06	287045	85562.7	8.68009e+06	290452	762234	460871	2.74664e+06
P25205	DNA replication licensing factor MCM3	MCM3	0.000152623	1.20527e+06	1.59891e+06	961437	107028	6.57967e+06	861365	4.01059e+06	247025	2.89538e+06	672098	2.10038e+06	8.99342e+06	734162	762993	3.14732e+06	66205.4	586363	1.47161e+06	816217	889578	2.85495e+06	1.04725e+07	2.74961e+06	492703	2.86544e+06	1.48289e+07	1.4637e+06	1.28585e+06	462227	505711	5.4729e+06	5.83963e+06	526176	895392	790048	1.06639e+06	9.67935e+06	3.52507e+07	8.66337e+06	3.68053e+07	1.92852e+07	2.23859e+07	2.09696e+06	1.0418e+07	7.73148e+06	9.77977e+06
P25774	Cathepsin S	CTSS	3.54e-07	2.69946e+06	1.48697e+07	3.69587e+06	6.7011e+06	4.27373e+06	2.17767e+07	7.5967e+06	8.04838e+06	4.97102e+06	9.38704e+06	1.29158e+07	1.00302e+07	1.56313e+07	2.13461e+07	3.57776e+06	1.43222e+07	1.22313e+07	4.6591e+06	1.04589e+07	2.73221e+07	7.86271e+06	2.05368e+06	8.80628e+06	2.6744e+06	4.63441e+06	8.29036e+06	6.03839e+06	7.23391e+06	1.48964e+06	9.10769e+06	1.02238e+07	1.40888e+07	9.14406e+07	8.42689e+06	2.98982e+07	2.39403e+07	273260	2.81625e+06	1.51895e+07	8.81627e+06	3.3845e+06	0	5.20923e+06	426620	1.62882e+07	267543
P25815	Protein S100-P	S100P	0.0138973	0	0	0	4.61476e+06	0	0	0	0	0	9.83704e+07	0	7.32561e+06	0	1.39585e+07	0	6.10613e+06	5.20362e+06	3.78122e+06	0	3.71158e+07	2.42616e+07	0	1.7642e+07	0	6.71602e+06	1.7401e+06	0	155305937	0	4.89094e+07	3.24553e+06	4.12681e+06	1348016217	0	3.65376e+06	0	0	1.43367e+08	1.47354e+08	0	4.58776e+06	0	7.44974e+06	1.94475e+06	4.43777e+08	0
P26447	Protein S100-A4	S100A4	1.81e-11	1.33329e+07	2.58451e+07	3.05696e+07	7.55706e+07	1.01185e+07	2.01832e+07	7.46852e+06	1.38708e+07	3.245e+07	4.12489e+06	3.67959e+07	2.42823e+07	6.72358e+06	4.64497e+07	3.99383e+06	4.85038e+07	1.45213e+07	2.35352e+07	2.18353e+07	3.28209e+07	3.05901e+07	4.50493e+06	1.08379e+07	2.31506e+07	2.41908e+07	3.32942e+07	4.02077e+07	1.30085e+07	5.00754e+06	3.37745e+07	1.01241e+08	7.47338e+07	3.97918e+06	2.31578e+07	9.82223e+07	3.57131e+07	0	1.86364e+07	6.2982e+07	1.73956e+07	0	2.67031e+06	6.40864e+07	1.61954e+06	2.61503e+07	2.87432e+07
P27540	Aryl hydrocarbon receptor nuclear translocator	ARNT	0.000185463	79341	124603	0	0	379905	291365	573523	142786	262883	85669.3	406834	91424.2	0	456732	0	0	59536	142383	0	0	0	140140	104445	0	407318	1.46368e+06	0	0	94116.2	66116.2	57265.3	374169	65095.7	0	581009	0	556856	1.1548e+06	698788	1.57166e+06	4.66086e+06	849817	237654	113762	4.8086e+06	158766
P27707	Deoxycytidine kinase	DCK	0.00175854	1.65517e+06	2.46309e+06	616619	0	2.59894e+06	846970	335552	250022	1.03397e+06	0	779997	928856	505028	1.26814e+06	276222	351837	485943	628543	528704	1.58992e+06	0	639668	212450	0	2.17233e+06	1.64903e+06	155520	0	223164	563917	1.17132e+06	1.08049e+06	407233	302742	966850	2.28637e+06	0	2.12948e+06	1.85693e+06	4.04549e+06	0	1.744e+06	0	598822	1.73563e+06	602718
P28067	HLA class II histocompatibility antigen, DM alpha chain	HLA-DMA	3.13e-09	5.97638e+06	5.03825e+06	4.62739e+06	2.43152e+06	2.19777e+06	1.76403e+06	0	0	8.86687e+06	7.62993e+06	0	1.75773e+06	0	1.70757e+06	0	1.97708e+06	4.3587e+06	889190	2.50591e+06	1.9962e+07	621873	0	0	0	0	2.43881e+06	6.06e+06	0	0	6.83049e+06	7.7914e+06	701611	6.27925e+06	1.45667e+06	6.32997e+06	4.98053e+06	0	1.11761e+07	3.93964e+06	3.86695e+06	0	0	0	0	1.50848e+07	0
P28068	HLA class II histocompatibility antigen, DM beta chain	HLA-DMB	0.00114761	881835	2.29934e+06	0	1.77357e+06	0	0	270793	0	444863	475855	632078	856459	0	882004	0	0	1.88726e+06	305962	587095	6.42341e+06	933192	339246	362725	0	0	0	741060	0	0	1.63973e+06	1.938e+06	0	5.96734e+06	2.28536e+06	1.15513e+06	3.98737e+06	0	0	730069	1.90933e+06	0	0	0	0	1.04306e+06	0
P28072	Proteasome subunit beta type-6	PSMB6	0.0582719	1.45677e+07	3.36002e+07	3.5457e+07	2.02721e+07	5.47959e+07	1.72497e+07	6.36996e+07	6.56638e+07	5.49712e+07	1.55996e+07	3.22017e+07	3.52764e+07	3.42873e+07	3.64179e+07	4.69226e+07	1.82978e+07	2.32425e+07	4.91031e+07	4.96949e+07	3.4805e+07	1.76987e+07	1.65543e+07	3.24089e+07	5.59323e+07	5.19596e+07	4.31414e+07	4.62129e+07	4.18308e+07	4.95041e+07	2.27152e+07	4.35272e+07	3.40539e+07	3.93681e+07	5.35992e+07	1.55703e+07	3.59074e+07	1.125e+08	2.62076e+07	6.42383e+07	2.23352e+07	4.24361e+07	5.56564e+07	2.12812e+07	3.95348e+07	4.68329e+06	6.5178e+07
P28161	Glutathione S-transferase Mu 2	GSTM2	0.170369	0	563505	2.68198e+06	2.23909e+07	259795	336396	0	0	1.32568e+06	447134	334670	0	0	3.32294e+06	0	747428	701307	468789	2.22781e+06	0	0	6.79982e+06	0	448334	2.71682e+06	0	468105	0	1.48374e+06	4.88282e+06	2.89375e+06	0	244592	6.3609e+06	8.11447e+06	431026	0	227334	0	0	342802	0	134177	0	517099	0
P28330	Long-chain specific acyl-CoA dehydrogenase, mitochondrial	ACADL	0.00274471	106366	1.42832e+07	1.09045e+07	1.02758e+07	2.81305e+07	408583	3.61393e+07	3.22803e+07	6.27152e+06	102272	1.8193e+07	4.11663e+06	1.52359e+06	1.04431e+06	1.74929e+07	1.11756e+07	4.58575e+06	3.92097e+07	2.84302e+07	1.76007e+07	9.27105e+06	5.84622e+07	1.09198e+06	4.1625e+06	1.22266e+06	113401	8.46804e+06	1.69164e+06	2.68292e+06	0	2.13007e+07	488310	1.43714e+06	8.66418e+07	311223	2.56215e+06	1.91804e+06	1.181e+06	0	1.64256e+07	4.0451e+06	3.64742e+07	0	1.50032e+06	39515	0
P28332	Alcohol dehydrogenase 6	ADH6	3.63e-07	1752659272	7.43556e+08	6.81808e+08	1288205494	2.58791e+08	251380008	4.66237e+08	3.2066e+08	2.28554e+08	1204553376	2.29171e+08	1150005546	5.73674e+08	4.90702e+08	5.85062e+08	3.23711e+08	7.52505e+08	1.78194e+08	1053977088	384129998	5.24325e+08	2.69929e+08	8.14595e+08	6.83411e+08	5.7366e+08	3.05793e+08	3.9466e+08	4.99083e+08	4.99984e+08	9.49062e+07	4.92765e+08	5.05936e+08	2.07386e+07	1057341503	3.75355e+08	7.57553e+08	1.81879e+08	2.83179e+08	2.09597e+08	2.3678e+08	4.53177e+08	1.26943e+08	5.00516e+08	4.52187e+08	215974530	2.47119e+08
P28340	DNA polymerase delta catalytic subunit	POLD1	0.000375108	0	31431.9	0	0	257152	113235	153673	53824.1	139746	33451.3	101420	281350	39279.3	0	0	0	0	44678.4	32268.9	73749.8	0	82596.2	0	611109	0	215199	27371.3	25451.6	81936.4	0	177134	209545	0	0	50579	0	185012	795166	0	2.21347e+06	763997	638294	0	69468.5	746498	0
P28370	Probable global transcription activator SNF2L1	SMARCA1	1.75e-05	0	76447.1	141018	56272.3	672463	74469.7	43764.2	0	137601	0	188512	187013	423989	268496	0	0	119937	0	0	417335	198200	91708.8	573511	188402	285670	0	119776	349178	71740.1	142960	170959	0	60494.3	73636.7	426131	429274	134952	407993	869171	97509.8	1.57863e+06	465032	652738	266321	722776	1.01412e+06
P28799	Granulins;Acrogranin;Paragranulin;Granulin-1;Granulin-2;Granulin-3;Granulin-4;Granulin-5;Granulin-6;Granulin-7	GRN	0.000192905	237194	3.23596e+06	4.16544e+06	2.91111e+06	303801	4.85254e+06	527835	3.10339e+06	814601	4.96183e+06	4.66717e+06	3.12254e+06	2.77441e+06	3.61922e+06	343328	985119	1.7196e+06	4.26034e+06	2.0799e+06	2.50784e+06	3.33254e+06	266679	5.42921e+06	146317	4.16195e+06	627638	3.01282e+06	1.02448e+06	1.23388e+06	0	4.04903e+06	3.42249e+06	2.21447e+07	1.53131e+06	8.00712e+06	4.23939e+06	1.17945e+06	694991	1.91318e+06	3.28133e+06	2.756e+06	4.4742e+06	3.5922e+06	840244	7.64492e+06	1.07935e+06
P28845	Corticosteroid 11-beta-dehydrogenase isozyme 1	HSD11B1	1.32e-08	7.67241e+08	2.11594e+08	4.85922e+08	3.72627e+08	4.2775e+08	1.98582e+08	587416488	3.62947e+08	5.14877e+08	1.62864e+08	7.10034e+06	1.53682e+08	2.00452e+08	4.96429e+07	2.9759e+08	5.46878e+07	1.88964e+08	106260709	2.62494e+08	2.68916e+08	2.98898e+08	3.67235e+07	4.93105e+08	6.13318e+08	2.02698e+08	5.86548e+07	265747374	1.94242e+08	2.95698e+08	5.8031e+07	1.09514e+08	1.46855e+08	8.7e+06	4.32808e+08	3.76868e+07	8.69083e+06	5.91145e+07	8.91725e+07	2.04815e+07	1.06225e+06	4.62899e+06	1.27243e+08	4.81521e+07	5.11422e+08	6.1479e+07	115020
P28907	ADP-ribosyl cyclase/cyclic ADP-ribose hydrolase 1	CD38	0.000659919	0	454837	0	3.11309e+06	1.66061e+06	0	0	360252	1.77933e+06	1.15245e+07	0	0	0	1.31633e+07	0	0	0	0	1.48507e+06	105999	701629	0	0	0	184679	0	0	0	0	298748	213245	315577	0	0	912091	2.37856e+06	0	0	8.36711e+06	0	0	0	0	0	580503	0
P29350	Tyrosine-protein phosphatase non-receptor type 6	PTPN6	4.9e-11	5.25396e+06	6.45869e+06	6.42327e+06	5.40186e+06	4.38855e+06	3.3984e+06	4.87671e+06	8.97699e+06	3.97953e+06	5.14681e+06	1.03449e+07	1.03891e+07	3.29093e+06	7.88242e+06	729456	2.86177e+06	7.92095e+06	4.23524e+06	9.11282e+06	1.08293e+07	3.67502e+06	4.68015e+06	3.74041e+06	2.24583e+06	1.01584e+07	7.55877e+06	6.01814e+06	1.62515e+06	1.65165e+06	6.37591e+06	6.02669e+06	8.32658e+06	3.99369e+06	1.91841e+07	1.27479e+07	8.21906e+06	1.0352e+06	2.49637e+06	1.15501e+07	9.63694e+06	2.65697e+06	3.39066e+06	3.6019e+06	927891	1.49089e+07	6.51095e+06
P29466	Caspase-1;Caspase-1 subunit p20;Caspase-1 subunit p10	CASP1	2.05e-07	348000	6.64538e+06	4.14093e+06	3.20503e+06	1.79129e+06	4.06946e+06	5.87697e+06	7.0408e+06	5.15042e+06	2.85742e+06	9.70999e+06	9.11878e+06	958758	5.21368e+06	0	6.30388e+06	9.00933e+06	3.97472e+06	4.41244e+06	2.39973e+06	1.02888e+07	4.22608e+06	2.19554e+06	303986	2.58545e+06	709870	4.66223e+06	1.33137e+06	838662	2.07774e+06	7.58604e+06	5.81887e+06	2.96588e+06	5.00144e+06	2.87019e+06	2.36431e+06	597470	4.95958e+06	5.38512e+06	1.91131e+06	0	0	645854	0	2.97527e+06	91651.7
P29536	Leiomodin-1	LMOD1	0.575024	0	19788.6	1.18676e+06	2.56402e+06	0	0	0	0	69332.7	0	130945	0	0	0	0	0	0	216529	0	0	0	0	0	0	206784	299344	168065	0	0	0	723663	0	0	203466	715725	0	0	410491	0	0	0	0	40336.8	0	214441	153684
P29590	Protein PML	PML	3.71e-06	3.26041e+06	1.9426e+06	5.33864e+06	6.03355e+06	3.87313e+06	2.78648e+06	4.09563e+06	1.77405e+06	7.67617e+06	810529	9.79171e+06	1.94505e+06	633103	9.47606e+06	1.16385e+06	6.64005e+06	4.05381e+06	4.34009e+06	1.26778e+06	2.64268e+06	1.532e+07	1.48764e+06	2.88786e+06	2.34871e+06	2.45641e+06	1.39925e+06	1.05079e+07	174684	588671	3.69181e+06	1.03758e+07	1.42704e+06	257472	6.54616e+06	123143	580677	1.50113e+06	5.45435e+06	7.56875e+06	3.3616e+06	2.16496e+06	5.31859e+06	2.23817e+06	574649	6.6149e+06	1.55743e+06
P29728	2-5-oligoadenylate synthase 2	OAS2	0.0251304	68233.6	5.3646e+06	3.16631e+07	1.17124e+06	992261	1.67107e+06	8.86038e+06	1.91503e+06	3.13568e+06	2.25808e+07	3.80537e+06	1.0972e+06	1.41102e+06	1.46476e+07	137702	8.26692e+06	2.94889e+06	571356	8.19226e+06	2.61141e+06	6.75982e+06	1.42763e+06	1.26875e+07	3.61736e+06	688052	77931.4	875798	364503	6.74913e+06	1.22003e+07	2.8183e+06	3.07181e+06	706931	5.04467e+06	4.57209e+06	1.51825e+07	76250.4	413798	4.64837e+06	257123	228433	0	492131	215559	2.63386e+07	55635.7
P30047	GTP cyclohydrolase 1 feedback regulatory protein	GCHFR	0.00381625	2.29326e+07	3.30246e+07	2.26022e+07	4.98168e+07	7.07801e+07	1.88308e+07	8.15333e+07	2.44296e+07	2.74248e+07	6.08646e+07	3.39838e+07	2.88804e+07	1.72618e+07	1.41282e+07	1.53035e+07	113658465	3.87193e+07	4.28911e+07	3.59935e+07	3.99131e+07	8.8854e+07	3.79256e+07	4.8726e+07	3.31791e+07	2.39543e+07	1.22852e+08	3.30045e+07	1.18452e+07	3.0452e+07	1.33176e+07	3.16906e+07	3.04758e+07	8.2864e+06	5.69725e+07	1.29643e+07	5.6022e+07	2.30768e+08	1.81868e+07	5.88414e+07	2.25108e+07	9.07738e+07	4.99381e+07	4.71333e+06	9.83619e+06	5.27229e+07	1.52518e+07
P30260	Cell division cycle protein 27 homolog	CDC27	0.120618	0	0	65570.8	0	0	914910	0	0	0	0	0	0	0	137178	54961.5	56091.7	0	0	632369	0	0	0	98573	0	0	0	0	80823.3	0	0	476311	54590.6	0	0	0	0	0	241519	0	0	1.02721e+06	374315	157571	0	466733	87135.8
P30273	High affinity immunoglobulin epsilon receptor subunit gamma	FCER1G	1.43e-05	0	5.32331e+07	9.38981e+06	2.73641e+07	0	5.12845e+06	1.22079e+07	6.37418e+06	9.38814e+07	2.29359e+07	1.47451e+07	9.80157e+06	1.64209e+07	6.37685e+07	0	2.63712e+07	3.4457e+07	7.72173e+06	1.97065e+07	1.53108e+07	1.50906e+07	7.82455e+06	1.13211e+07	1.17063e+07	1.60536e+07	6.32671e+06	2.39689e+07	1.12571e+07	6.77973e+06	6.59994e+07	1.83876e+07	1.53613e+07	6.55438e+07	19389645	1.37644e+07	0	0	2.47174e+07	2.7275e+07	9.53037e+06	0	0	1.82117e+07	0	9.40937e+06	0
P30531	Sodium- and chloride-dependent GABA transporter 1	SLC6A1	0.000243149	503189	0	0	0	1.54625e+06	490251	1.69657e+06	665245	341755	432541	0	895022	0	0	3.24337e+06	1.17799e+06	1.87688e+06	1.57842e+06	1.23477e+06	414927	696823	0	0	0	1.70773e+06	213380	544628	552153	939975	1.26188e+06	0	1.06218e+06	2.36938e+06	0	582457	1.15703e+06	1.60254e+06	2.26489e+06	636840	2.0711e+06	2.58203e+06	635318	0	0	1.68698e+06	4.88906e+06
P30613	Pyruvate kinase PKLR	PKLR	0.00906401	2.64819e+08	2.23355e+08	8.81957e+07	1.44464e+08	1.01829e+08	1.57612e+08	1.73024e+08	2.86023e+08	5.29995e+08	7.73438e+07	5.2001e+07	3.99254e+08	1.80109e+08	1.03453e+08	271570547	5.73481e+07	4.90301e+08	5.91806e+08	3.17036e+08	2.31538e+08	3.41834e+08	8.81112e+07	8.1424e+07	2.98103e+08	1.37504e+08	8.48818e+07	3.89941e+08	100358944	1.7654e+08	1.24286e+08	1.63676e+08	4.02499e+08	6.85967e+07	1.42447e+08	8.13949e+07	2.99026e+07	1.12777e+08	1.60067e+08	7.16268e+07	3.6079e+07	4.74856e+07	9.97705e+07	7.54843e+07	2.80109e+08	6.54156e+07	1.20413e+08
P30626	Sorcin	SRI	0.000343348	1.33544e+07	2.01351e+07	2.99065e+07	1.27287e+07	3.77787e+07	2.05188e+07	5.60037e+06	161802	7.35299e+06	1.92217e+07	1.5482e+07	3.51807e+06	0	4.82144e+06	0	9.99885e+06	1.69937e+07	2.77365e+07	6.69004e+06	7.14382e+06	4.97778e+06	9.53774e+06	8.73176e+06	3.58963e+06	1.26444e+07	1.20204e+07	1.00254e+07	3.99291e+06	3.06491e+06	3.47174e+07	2.14467e+07	1.51935e+07	2.89612e+07	6.70073e+06	8.85339e+06	1.33365e+07	1.22736e+07	1.95457e+07	2.25009e+07	1.53839e+07	3.44565e+07	1.10693e+07	2.24436e+08	5.26194e+06	1.0045e+07	2.34401e+06
P31146	Coronin-1A	CORO1A	6.08e-15	9.07663e+06	5.05953e+07	7.53831e+07	7.15507e+07	1.83149e+07	1.46281e+07	2.00339e+07	4.94088e+07	6.73797e+07	3.55639e+07	4.28075e+07	1.99281e+07	1.73118e+07	135053402	4.77098e+06	2.92433e+07	7.70886e+07	3.12978e+07	6.9286e+07	6.16866e+07	8.52376e+07	8.58729e+06	2.01274e+07	1.29723e+07	5.36672e+07	2.84112e+07	5.35876e+07	1.39995e+07	1.10747e+07	5.13331e+07	8.71869e+07	5.3027e+07	4.40814e+07	5.34898e+07	1.04403e+08	8.55927e+07	4.11955e+06	2.33363e+07	1.11898e+08	1.30874e+07	4.21608e+06	1.71612e+06	1.53572e+07	2.50434e+06	6.47729e+07	1.20059e+07
P31323	cAMP-dependent protein kinase type II-beta regulatory subunit	PRKAR2B	0.00314986	0	0	254279	4.16581e+06	0	0	0	0	332668	0	0	0	0	0	0	0	0	0	198823	0	0	0	0	0	0	0	0	0	0	144855	0	0	0	253488	813852	0	0	0	0	0	0	0	0	0	0	0
P31327	Carbamoyl-phosphate synthase [ammonia], mitochondrial	CPS1	9.52e-05	6.13598e+08	3001374499	3908427176	3356809369	9387344431	2332124469	4544715056	1606920827	2304119863	3185772741	3111041503	2325509880	3466218810	2497016012	5477857635	2392696507	3004291152	7.60112e+08	2580800934	361867657	2342833914	5983200179	4672307043	1987137188	2412517361	4656171599	1738909423	3451366305	3229740115	3109973665	3684942302	1539698133	2424518368	2961886351	3545820675	6088925164	3890223290	6.00058e+07	1531322974	4789663732	3279201040	9.171e+08	2333434996	4.68497e+08	12989039196	2161112787
P31350	Ribonucleoside-diphosphate reductase subunit M2	RRM2	0.00210896	0	231654	0	0	0	186743	110567	0	261248	801554	656082	708819	0	0	450402	0	0	1.52201e+06	217276	2.77362e+06	0	1.98568e+06	851565	0	0	1.37318e+06	1.15828e+06	0	147379	0	1.47726e+06	0	0	0	0	2.58941e+06	4.65376e+06	1.08207e+06	1.017e+06	1.24282e+06	2.01552e+06	5.62524e+06	853471	0	6.3857e+06	377499
P31483	Nucleolysin TIA-1 isoform p40	TIA1	8.42e-07	825291	0	235214	0	0	0	0	0	835773	346925	198768	0	0	0	0	145784	354984	0	289707	0	0	1.62463e+06	0	0	225922	0	190680	376388	0	0	0	0	0	309358	1.3203e+06	0	1.20974e+06	2.57721e+06	1.04934e+06	0	0	425088	1.04361e+06	220666	400738	943913
P31512	Dimethylaniline monooxygenase [N-oxide-forming] 4	FMO4	0.000700671	5.21314e+06	8.9071e+06	5.13023e+06	4.56152e+06	7.5488e+06	1.48497e+07	5.15371e+06	1.88253e+07	3.70737e+07	984956	1.18836e+07	6.6447e+06	2.74438e+07	3.13324e+06	5.97933e+06	8.81708e+06	3.86228e+06	6.13261e+06	8.20423e+06	1.87603e+06	5.33604e+06	2.94888e+06	4.60514e+06	6.03662e+06	4.56146e+06	1.92173e+07	2.28518e+07	5.65176e+06	9.00005e+06	8.33492e+06	3.31594e+06	2.30649e+06	1.96257e+07	1.03744e+07	2.71725e+06	1.36514e+06	2.35671e+06	2.26344e+07	1.97235e+06	4.09187e+06	6.56699e+06	1.30412e+06	5.5218e+06	2.25012e+07	2.80748e+07	1.94279e+06
P31513	Dimethylaniline monooxygenase [N-oxide-forming] 3	FMO3	2.69e-05	4.14893e+08	3.28793e+08	2.49353e+08	4.13733e+08	4.73952e+07	7.48797e+08	2.00679e+08	1270393930	2.4885e+08	5.33002e+07	5.65793e+07	381246209	6.68381e+08	5.66491e+08	3.99334e+08	1.85502e+08	2.54587e+08	8.415e+07	5.99092e+08	1.33903e+08	3.22645e+08	2.25645e+08	1.12673e+08	5.2035e+08	1.56405e+08	9.2805e+07	2.63201e+08	8.95777e+07	3.85185e+08	4.7214e+07	2.43079e+08	1.80793e+07	4.27477e+07	8.33273e+08	3.45221e+08	6.34701e+07	1.36681e+08	1.80009e+08	4.06554e+07	2.95108e+07	2.48074e+07	6.89687e+07	5.85341e+08	579988993	1.314e+08	6.55915e+07
P31949	Protein S100-A11;Protein S100-A11, N-terminally processed	S100A11	1.66e-10	1.16168e+07	5.53369e+07	1.55592e+08	1.25146e+08	2.08625e+07	2.73876e+07	4.60174e+07	3.35442e+07	2.17936e+07	3.5497e+07	6.33224e+07	3.069e+07	3.03429e+07	8.89767e+07	1.08703e+07	9.96241e+07	6.25816e+07	1.28671e+08	7.79857e+07	2.27489e+07	0	8.93526e+07	717375	1.07409e+07	2.29862e+08	1.9711e+07	1.41023e+06	2.54331e+07	1.20368e+07	5.66282e+07	1.22272e+08	1.49528e+07	7.57041e+07	8.03796e+07	2.03807e+08	2.76251e+07	0	0	5.66293e+07	2.67567e+06	1.20609e+07	1.129e+07	1.63344e+07	4.58639e+07	7.82773e+07	4.04943e+07
P31994	Low affinity immunoglobulin gamma Fc region receptor II-b	FCGR2B	0.0702056	269129	8.71326e+06	8.0575e+06	1.08433e+07	0	0	3.16313e+06	0	7.66695e+06	0	0	0	1.81403e+06	0	0	951184	6.58253e+06	0	1.71688e+07	0	1.90449e+07	0	0	0	0	0	741979	7.09632e+06	3.45526e+06	2.07264e+06	1.18289e+06	0	0	5.6245e+06	5.71592e+06	0	1.76637e+07	0	0	0	1.55958e+06	0	0	0	2.91216e+06	677773
P32121	Beta-arrestin-2	ARRB2	2.38e-09	0	483437	156953	0	0	125778	0	280474	640212	658327	461340	381586	938240	1.56873e+06	126545	1.05752e+06	506957	0	0	947947	0	174045	1.36788e+06	0	311504	1.19438e+06	1.46706e+06	0	0	712279	281468	507257	1.0671e+06	177199	1.00028e+06	977819	0	285283	700535	809054	952778	1.21733e+06	117473	0	1.00239e+06	1.58194e+06
P32321	Deoxycytidylate deaminase	DCTD	0.000475068	297631	1.47224e+06	3.47588e+06	1.16538e+06	1.94054e+06	9.5706e+06	683692	1.55104e+06	604371	1.80066e+06	4.26809e+06	1.60649e+06	0	761997	5.48318e+06	5.00119e+06	5.55066e+06	5.59182e+06	952998	5.17781e+06	180579	0	0	532785	1.46375e+06	2.02014e+06	0	189343	0	761490	3.19549e+06	2.00061e+06	320508	1.76206e+06	2.86373e+06	1.34695e+07	2.14823e+06	299437	5.43049e+06	2.60093e+06	272616	1.21605e+06	0	0	1.9214e+06	4.17463e+06
P32322	Pyrroline-5-carboxylate reductase 1, mitochondrial	PYCR1	0.00123999	657995	0	1.67865e+06	0	4.71166e+06	0	0	0	3.17333e+06	0	0	0	0	0	0	0	0	0	0	0	0	729059	0	0	19831671	904238	0	1.49737e+07	0	0	0	0	193226	0	1.11593e+06	0	4.20306e+06	2.61786e+06	0	1.98361e+07	125802	0	0	1.60677e+06	2.3932e+06	0
P32456	Interferon-induced guanylate-binding protein 2	GBP2	0.04701	2.17659e+06	3.90211e+06	3.03854e+06	764919	0	191395	156558	262768	9.68629e+06	8.83772e+06	6.09714e+06	1.63157e+06	0	4.53644e+06	1.37564e+06	1.56191e+06	2.78318e+06	1.29422e+06	1.95029e+06	8.81283e+06	2.76214e+06	2.09245e+06	2.50926e+06	0	3.00911e+06	7.22856e+06	512583	7.86054e+06	608308	4.81315e+06	4.49676e+06	6.09975e+06	7.70316e+07	819076	3.10781e+06	3.55584e+06	1.20028e+06	1.0269e+07	1.00115e+07	233443	496239	4.37021e+06	1.64191e+06	0	790268	1.52848e+06
P32754	4-hydroxyphenylpyruvate dioxygenase	HPD	9.64e-11	2.8379e+08	519464032	3.56732e+08	2.79243e+08	575853770	3.49787e+08	6.17857e+08	6.084e+08	268729160	728968419	5.87188e+08	2.30312e+07	7.40858e+08	2.82039e+08	8.89057e+08	6.14735e+08	5.52226e+08	3.43893e+08	4.38115e+08	4.91722e+08	1.43283e+08	130834610	2.65834e+08	5.32963e+08	359023737	1.34287e+08	4.17164e+08	3.28168e+08	1245889370	1.57275e+08	7.02229e+08	9.36038e+07	2.02914e+07	4.77136e+08	2.80932e+08	7.24519e+07	1.53734e+08	2.20776e+08	1.61446e+07	1.4192e+06	2.06068e+07	1.20843e+07	6.80936e+07	3.48563e+08	1.953e+08	316493
P32929	Cystathionine gamma-lyase	CTH	2.46e-05	5.2925e+07	182918615	1.85398e+08	158824424	6.79806e+07	151924232	3.78777e+08	1.09189e+08	3.87324e+07	3.53328e+08	2.62399e+07	6.61153e+07	7.10388e+08	9.23828e+07	1.6882e+08	6.92363e+08	371366498	3.22125e+07	1.53264e+08	1.68685e+08	7.96557e+07	9.04187e+07	9.19858e+07	1.11425e+08	1.36796e+08	9.05012e+08	2.58588e+07	4.63648e+07	6.17517e+08	1.39321e+08	2.33016e+08	2.70558e+07	4.96534e+07	1.61601e+08	1.03212e+08	4.29222e+07	3.62334e+07	2.04624e+08	2.05408e+07	5.54834e+07	72175306	5.99493e+07	1.6874e+07	2.56011e+07	540555073	1.19529e+06
P33121	Long-chain-fatty-acid--CoA ligase 1	ACSL1	2.73e-05	4.10032e+07	1.76565e+08	2.20216e+08	5.65019e+08	3.29236e+08	169841349	4.56348e+08	2.28612e+08	1.70573e+08	2.55924e+08	527559090	269668127	2.59771e+08	1.46479e+08	2.85746e+08	3.25393e+08	4.10771e+08	3.57761e+08	2.98249e+08	2.08764e+08	3.10102e+08	9.97587e+07	2.42613e+08	2.49422e+08	1.55162e+08	2.99713e+08	1.89322e+08	3.31757e+08	2.66563e+08	6.24214e+07	1.55277e+08	6.59682e+08	9.88283e+07	3.51271e+08	2.29282e+08	4.17941e+08	9.73728e+07	7.12327e+07	1.35994e+08	171216079	1.99581e+08	3.3624e+08	4.10956e+07	9.55345e+07	2.31416e+08	1.33097e+08
P33241	Lymphocyte-specific protein 1	LSP1	3.95e-13	1.21995e+07	1.16934e+07	1.692e+07	2.08467e+07	7.40865e+06	4.05499e+06	6.21904e+06	6.21623e+06	1.76006e+07	3.13733e+06	2.2084e+07	2.76197e+06	6.40578e+06	1.56207e+07	2.69189e+06	4.57645e+06	9.96297e+06	1.50502e+06	9.18812e+06	1.80032e+07	1.0385e+07	4.02696e+06	5.73992e+06	873198	1.20918e+07	4.44387e+06	2.1887e+07	3.63214e+06	2.44689e+06	1.41849e+07	1.81737e+07	1.65489e+07	2.96037e+07	1.25335e+07	2.16234e+07	3.12756e+06	1.29211e+06	3.47452e+06	2.0008e+07	1.19528e+07	2.02428e+06	881301	1.47234e+06	202941	1.73671e+07	4.80336e+06
P33991	DNA replication licensing factor MCM4	MCM4	0.000461762	195931	716714	1.02205e+06	0	2.3811e+06	515698	1.03559e+06	239017	1.919e+06	183030	8.27561e+06	3.54534e+06	20370.7	222689	634436	261928	104311	298638	1.04522e+06	84748.2	578280	7.44419e+06	1.30426e+06	0	1.05482e+06	1.13665e+07	192624	740949	0	0	5.19604e+06	4.38021e+06	0	67436.7	287159	271782	6.47937e+06	1.77982e+07	4.54466e+06	2.09374e+07	1.34441e+07	8.9651e+06	745259	6.96079e+06	3.18182e+06	8.68231e+06
P33992	DNA replication licensing factor MCM5	MCM5	0.000322821	619257	573945	436302	0	2.58707e+06	1.24799e+06	1.44897e+06	102681	909263	229384	1.56133e+06	7.11399e+06	231521	493273	96419.8	0	70383.2	349262	130448	58728	449511	3.5091e+06	1.19058e+06	118728	816184	6.61844e+06	308981	418786	164050	123934	833000	5.33866e+06	0	194715	106793	0	6.66291e+06	2.09465e+07	4.38274e+06	2.27151e+07	1.02979e+07	1.01076e+07	904505	6.01488e+06	2.59416e+06	4.84924e+06
P33993	DNA replication licensing factor MCM7	MCM7	0.000627964	0	1.00707e+06	85630.4	0	2.97291e+06	1.11646e+06	3.69164e+06	0	1.01766e+06	115281	2.44968e+06	4.38716e+06	380399	421581	0	570510	325849	311092	118959	0	616903	4.29382e+06	544843	0	480660	1.49133e+07	482013	226221	0	116289	2.84753e+06	1.89755e+06	0	216619	1.06286e+06	527943	1.02666e+07	3.45775e+07	3.16596e+06	2.45763e+07	1.46916e+07	1.06222e+07	477272	5.20499e+06	5.45717e+06	6.6129e+06
P34896	Serine hydroxymethyltransferase, cytosolic	SHMT1	2.97e-05	3.19374e+08	5.0373e+08	2.29909e+08	6.71088e+08	1.32859e+08	3.01558e+08	479923653	2.72879e+08	3.54061e+08	1.1961e+08	4.04032e+08	302971118	6.61598e+08	1.95101e+08	9.90461e+08	2.52316e+08	5.69871e+08	179904916	3.71293e+08	125245486	1.42403e+08	1.96178e+08	289590550	3.97603e+08	1100726194	654992881	3.35243e+08	9.53254e+07	527020732	5.35661e+08	1.43513e+08	2.30025e+08	8.78385e+07	9.36824e+08	3.2848e+08	1.66549e+08	4.53089e+08	1.74221e+08	4.08012e+08	2.12451e+08	2.90195e+08	4.23868e+08	3.39517e+07	2.66474e+08	7.28326e+08	1.14367e+08
P34913	Bifunctional epoxide hydrolase 2;Cytosolic epoxide hydrolase 2;Lipid-phosphate phosphatase	EPHX2	0.000140956	3.1176e+08	3.4806e+08	1.19278e+08	3.16432e+08	8.88326e+07	12944961	3.74394e+08	1.84276e+08	2.15444e+08	1.04767e+08	2.16453e+08	1.33769e+08	9.74306e+07	4.89246e+07	8.71788e+07	2.19331e+08	3.77849e+08	1.5079e+08	2.54984e+08	299200618	1.01211e+08	1.88194e+08	8.92671e+07	4.56225e+07	9.49011e+07	3.01074e+08	3.76416e+08	1.85762e+08	3.13836e+08	1.62887e+08	5.78895e+07	1.35436e+08	3.12635e+08	2.99486e+08	9.34107e+07	3.19284e+08	1.33044e+08	2.92186e+07	4.9328e+07	1.98404e+08	2.10017e+08	1.29892e+08	5.36166e+07	1.02117e+08	3.20586e+08	1.9071e+08
P35052	Glypican-1;Secreted glypican-1	GPC1	4.72e-05	119870	0	279782	805588	0	0	0	85156	0	0	578154	0	0	1.08905e+06	0	0	0	0	0	197713	749601	0	0	0	2.46996e+06	211692	0	0	0	1.00701e+06	1.38054e+06	175953	0	0	2.394e+06	0	173359	1.59116e+06	0	380162	0	0	132069	0	289657	0
P35249	Replication factor C subunit 4	RFC4	2.14e-05	645365	1.02138e+06	782149	424451	1.0557e+06	1.66916e+06	1.03441e+06	0	717424	332769	6.51706e+06	1.94931e+06	373493	454492	201755	454054	278752	251380	951680	670375	1.48979e+06	3.01641e+06	881669	0	1.52714e+06	4.35866e+06	679237	3.67881e+06	205121	1.52486e+06	1.62017e+06	3.63315e+06	0	205935	1.36292e+06	965900	1.14872e+07	1.10673e+07	7.32974e+06	1.17619e+07	6.16021e+06	9.61864e+06	885335	4.6469e+06	2.60559e+06	8.62845e+06
P35250	Replication factor C subunit 2	RFC2	1.8e-05	412686	238561	0	158576	806578	1.07963e+06	230524	222654	743424	177243	3.64262e+06	428067	458695	414516	74163.8	563027	950499	551602	0	854279	686599	358251	373138	98918.4	1.89358e+06	1.94364e+06	165501	1.49999e+06	0	729679	1.05047e+06	605242	0	73107.6	1.57452e+06	1.03349e+06	2.17666e+06	3.11006e+06	3.44379e+06	1.55604e+06	1.51652e+06	4.56418e+06	417562	2.20192e+06	5.96631e+06	2.90026e+06
P35251	Replication factor C subunit 1	RFC1	3.79e-06	140995	96512.6	0	0	359330	106684	0	0	0	403253	175408	293951	153509	173325	694409	0	0	129663	0	193286	93728.8	70080.8	307514	0	385373	371976	100960	757059	57646.2	0	180819	263133	0	0	497498	116055	1.96247e+06	728096	1.07381e+06	1.06333e+06	598947	1.576e+06	0	403362	327570	778911
P35442	Thrombospondin-2	THBS2	4.88e-06	0	668254	1.54226e+07	0	0	0	0	95217.2	427448	0	5.99935e+06	376337	0	4.34398e+07	0	4.03451e+06	0	6.52116e+06	0	0	0	4.40488e+06	0	0	4.45094e+07	247028	632245	1.05703e+06	272341	3.03811e+07	2.38183e+07	0	2.84929e+06	838821	1.40424e+07	0	1.16973e+06	1.31464e+06	0	0	32811.3	0	0	0	155501	0
P35503	UDP-glucuronosyltransferase 1-3	UGT1A3	0.00339736	4.23705e+07	4.7865e+06	1.36939e+07	4.34884e+06	788241	9.19592e+06	0	8.30651e+06	1.0425e+06	7.37144e+06	1.46249e+06	8.16067e+06	1.39754e+07	2.27311e+06	2.48285e+06	1.04523e+06	955204	6.12272e+06	1.03448e+06	1.8445e+07	989697	85444.8	1.16383e+07	1.25279e+07	2.15789e+06	2.89975e+06	718033	4.21904e+06	5.07994e+07	76926.6	8.2638e+06	1.09196e+06	0	1.40101e+07	798700	7.61798e+06	1.93689e+07	832530	0	116106	289564	60196.8	6.32382e+06	2.89428e+07	1.6341e+06	0
P35520	Cystathionine beta-synthase	CBS	9.62e-05	1.64209e+06	104796056	7.59374e+07	1.06955e+08	1.6659e+08	3.46521e+07	2.14556e+08	3.38622e+07	2.55196e+07	2.23396e+07	6.47454e+07	4.37399e+07	1.2931e+08	1.53588e+07	9.78425e+07	6.64877e+07	9.97657e+07	3.70815e+07	7.51109e+07	1.18351e+07	3.72611e+07	1.13478e+08	3.09711e+07	1.01391e+08	3.28885e+07	161189149	2.52198e+07	7.87564e+07	9.79794e+07	4.54687e+07	59337140	1.28904e+07	1.98643e+07	146321705	5.81394e+07	3.43416e+06	8.2094e+06	6.15853e+07	2.0279e+07	1.2323e+06	7.75952e+07	1.2803e+07	2.94663e+06	6.75365e+07	104073131	227536
P35558	Phosphoenolpyruvate carboxykinase, cytosolic [GTP]	PCK1	0.0260205	4.33342e+06	1.51888e+07	3.23963e+07	6.1118e+07	2.04806e+07	4.79865e+07	3.96581e+07	6.98499e+06	4.98175e+07	9.62487e+07	4.51735e+06	7.78281e+06	589982	2.38916e+06	1.67144e+07	4.99726e+07	2.23246e+07	2.58598e+06	6.08658e+07	9.22631e+07	1.31786e+07	7.43413e+06	31120813	8.84865e+06	3.37978e+07	1.16739e+08	5.74509e+06	2.9878e+07	3.1998e+07	3.29113e+07	2.82395e+07	4.47871e+06	3.35161e+06	2.9017e+07	1.26653e+07	3.80849e+06	966709	1.13657e+07	2.07084e+06	1.77224e+06	9.91872e+07	2.25135e+06	2.16382e+06	378131	1.52937e+08	42269
P35568	Insulin receptor substrate 1	IRS1	1.42e-07	40019.5	119661	777149	128750	193892	319148	311521	171217	147984	0	64050.4	32471.2	204421	79532.4	240492	71560.5	84477.5	78552.3	25657.7	16769.1	284726	0	413513	407375	151104	859028	0	499268	224972	82621.7	99455.8	198669	3846.67	576469	110776	6251.75	830701	1.15931e+06	448730	420550	391967	274528	939288	536768	152338	1.34844e+06
P35573	Glycogen debranching enzyme;4-alpha-glucanotransferase;Amylo-alpha-1,6-glucosidase	AGL	1.66e-08	6.09334e+07	8.83298e+07	5.49235e+07	1.42644e+08	5.44695e+07	2.68076e+07	6.82856e+07	6.37246e+07	2.31599e+07	6.14958e+07	1.74354e+07	4.36574e+07	2.68804e+07	2.49009e+07	7.96848e+07	2.40383e+07	1.04196e+08	5.0651e+07	8.42657e+07	3.45019e+07	4.22403e+07	2.69502e+07	6.17376e+07	6.82947e+07	2.36047e+07	3.75562e+07	7.48265e+07	2.53908e+07	8.32517e+07	2.01101e+07	2.58226e+07	4.61095e+07	1.05468e+07	1.1874e+08	1.58398e+07	1.49659e+07	5.40349e+07	1.18989e+07	2.77181e+07	3.85062e+06	3.1089e+07	4.79797e+07	7.0932e+06	1.75459e+07	2.51673e+07	3.08583e+07
P35575	Glucose-6-phosphatase	G6PC	0.0223664	1.54928e+06	6.57839e+06	1.15181e+07	1.05267e+07	7.04028e+06	1.06965e+06	1.70495e+07	0	4.00036e+07	4.73525e+06	2.15025e+07	1.47736e+07	4.4216e+06	7.20522e+06	2.61664e+07	3.56939e+06	3.25665e+07	5.65649e+06	1.5879e+07	5.03704e+06	8.66443e+06	3.88412e+06	2.4097e+07	0	2.90051e+07	7.26428e+07	1.61852e+07	1.36695e+07	8.23141e+06	6.94225e+06	3.28457e+07	2.03807e+06	6.12456e+06	7.2112e+06	9.02913e+06	2.57269e+07	1.06952e+07	7.33375e+07	6.47622e+06	1.89803e+07	0	7.11592e+06	0	1.15753e+06	1.89856e+08	9.01212e+06
P35610	Sterol O-acyltransferase 1	SOAT1	1.91e-06	0	312780	243767	0	0	0	0	0	0	811536	0	0	212937	291520	0	0	603849	0	149508	154432	0	0	184667	0	0	1.16547e+06	191239	0	0	0	480794	0	180868	0	141476	0	0	161512	1.2963e+06	448124	0	222298	0	0	856866	594247
P35637	RNA-binding protein FUS	FUS	3.96e-05	0	1.57449e+06	0	0	2.57506e+06	0	6.15065e+06	2.26609e+06	4.95378e+06	0	1.03562e+07	0	2.40088e+06	4.72304e+06	547878	4.59829e+06	0	527448	490745	0	1.70333e+06	8.98885e+06	2.8398e+06	629598	3.9943e+06	2.88132e+06	3.09925e+06	1.57204e+06	503958	764696	7.81976e+06	2.99688e+06	2.53581e+06	0	2.78349e+06	0	2.27084e+07	2.3198e+07	8.23125e+06	9.3628e+06	1.31234e+07	3.78099e+06	2.06197e+06	7.49258e+06	8.48676e+06	8.60571e+06
P35749	Myosin-11	MYH11	0.00468859	248142	5.645e+06	6.07557e+07	2.86582e+07	847116	315637	2.79734e+06	0	1.28297e+07	1.25556e+06	5.03508e+06	85590.7	1.00661e+06	1.32444e+06	843322	1.38657e+06	592963	4.49583e+06	131391	2.65602e+06	682040	4.93652e+06	3.94454e+06	1.60232e+06	9.06736e+06	6.41765e+06	6.46343e+06	3.86932e+07	3.00305e+06	1.7173e+07	1.52764e+07	4.05905e+06	2.58129e+06	6.9049e+06	7.21111e+07	0	0	4.08859e+06	262025	189651	398778	4.60424e+06	1.88259e+06	98920.1	940919	172210
P36269	Gamma-glutamyltransferase 5;Gamma-glutamyltransferase 5 heavy chain;Gamma-glutamyltransferase 5 light chain	GGT5	1.01e-05	0	1.91304e+07	4.64041e+07	56884064	1.79899e+07	1.28273e+06	8.71499e+06	1.1668e+07	4.22093e+07	3.9792e+06	2.49754e+07	402256	3.80634e+06	2.05728e+07	2.54596e+06	1.92061e+07	6.11602e+07	3.48581e+07	4.37118e+07	2.09388e+06	1.1322e+07	1.68021e+06	8.64162e+06	1.77772e+06	3.06004e+07	7.3254e+06	1.7328e+07	3.04712e+06	1.10561e+07	6.0299e+07	3.10342e+07	192369	3.91187e+06	5.02367e+07	5.25578e+07	491176	606898	3.20814e+06	326085	203576	1.78694e+06	0	660723	154987	3.77987e+06	0
P36404	ADP-ribosylation factor-like protein 2	ARL2	0.298442	4.14995e+07	2.32469e+06	1.48122e+06	0	0	274237	213910	0	2.53205e+06	731736	2.54206e+06	0	393208	6.30962e+06	215588	1.49036e+06	1.49151e+06	3.85803e+06	0	6.73103e+06	0	2.40001e+06	1.95415e+06	0	2.95223e+06	0	790269	0	0	0	1.52863e+06	0	501402	778886	1.78846e+06	4.68325e+06	0	2.44085e+06	6.84117e+06	6.78448e+06	0	753241	1.48733e+06	1.36341e+06	976779	6.47842e+06
P36537	UDP-glucuronosyltransferase 2B10	UGT2B10	1.54e-05	5.15237e+06	9.49785e+06	2.326e+07	6.63285e+07	6.8522e+06	2.07587e+07	2.88244e+07	8.6353e+07	2.22313e+06	2.37133e+06	1.37807e+07	5.65232e+07	8.28856e+07	1.20476e+07	3.2915e+07	511404	2.808e+07	2.45128e+07	9.83205e+07	6.50959e+07	3.59351e+07	9.41808e+06	2.63051e+07	2.59847e+07	1.78377e+07	4.94359e+06	2.12584e+07	6.6124e+07	3.71119e+07	507876	2.06733e+07	1.11269e+07	2.54525e+06	6.3723e+07	1.27633e+07	2.91205e+07	1.49172e+07	4.42211e+06	651995	6.47642e+06	9.73529e+06	1.46376e+07	1.6716e+07	5.12463e+06	5.18914e+07	3.4493e+06
P36955	Pigment epithelium-derived factor	SERPINF1	5.2e-09	1.04559e+07	1.06975e+07	3.62807e+07	3.04691e+07	1.36267e+07	4.38278e+07	9.94963e+06	2.50187e+07	6.46101e+06	2.0565e+07	1.69989e+07	2.50573e+07	3.53271e+07	6.9545e+07	7.12242e+06	4.14943e+07	3.02324e+06	1.59429e+07	4.91461e+06	1.96709e+06	8.63989e+06	3.23585e+07	2.57908e+06	1.11171e+07	1.26922e+08	1.8642e+07	1.72546e+07	1.50611e+07	5.82893e+06	5.70032e+07	6.03725e+07	1.67383e+07	2.13992e+07	1.08191e+07	7.47894e+07	8.78916e+06	1.70463e+07	2.84619e+07	5.13329e+07	6.18518e+06	1.53598e+07	1.02173e+07	2.14175e+07	6.16185e+06	2.08434e+07	1.37473e+07
P38435	Vitamin K-dependent gamma-carboxylase	GGCX	0.000325495	9.99707e+06	2.38208e+07	4.55685e+06	5.11172e+06	3.68501e+07	8.99124e+06	1.55441e+07	2.03905e+07	1.50959e+07	2.41688e+07	2.02045e+07	3.54552e+07	1.53825e+07	3.3522e+07	1.31595e+07	8.24437e+06	1.40122e+07	1.3956e+07	1.43334e+07	3.81635e+07	2.11729e+07	1.34433e+07	1.67575e+07	2.3238e+07	2.24405e+07	2.3405e+07	4.1466e+07	1.23899e+07	2.88779e+06	1.20739e+07	2.40477e+07	1.98459e+07	1.02183e+07	4.35193e+06	3.40736e+07	1.97207e+07	3.21451e+07	1.75214e+07	4.56298e+07	2.51761e+07	2.29806e+07	3.37218e+07	839914	2.77818e+07	1.91943e+07	5.09093e+07
P39748	Flap endonuclease 1	FEN1	8.7e-07	9.38947e+06	4.93872e+06	5.26218e+06	1.99581e+06	1.26987e+07	6.50892e+06	1.22252e+07	2.41222e+06	6.69267e+06	6.92711e+06	1.49567e+07	9.5891e+06	3.62582e+06	7.34837e+06	3.62118e+06	853981	5.05103e+06	645709	2.61486e+06	5.87229e+06	4.16499e+06	1.03374e+07	4.86179e+06	3.2787e+06	2.25023e+07	2.99965e+07	3.08934e+06	7.78015e+06	1.5873e+06	5.20894e+06	8.32194e+06	1.16379e+07	1.83012e+06	4.66516e+06	6.86325e+06	3.07312e+07	1.37303e+07	6.54992e+07	3.17084e+07	7.44847e+07	1.57658e+07	6.7871e+07	3.62743e+06	2.13289e+07	3.06975e+07	1.6571e+07
P40121	Macrophage-capping protein	CAPG	6e-11	1.79683e+07	1.27555e+07	5.34548e+07	7.62318e+06	9.97574e+06	4.73911e+06	1.25204e+06	1.20054e+07	5.91175e+06	9.07882e+06	5.83447e+07	3.01163e+07	3.83226e+07	3.06225e+07	1.19849e+07	2.40021e+07	5.37849e+06	1.1445e+07	6.79185e+06	2.34451e+07	3.30001e+07	7.17507e+07	1.23215e+07	5.58864e+06	3.58099e+07	1.27312e+07	2.40377e+07	1.93622e+07	8.24443e+06	2.31741e+07	8.70061e+07	1.70842e+07	2.40052e+08	1.33373e+07	6.47987e+07	2.35563e+07	3.05823e+06	2.33856e+06	6.69666e+07	2.73879e+07	9.12762e+06	1.71596e+07	3.65848e+06	309090	4.5615e+07	9.8368e+07
P40261	Nicotinamide N-methyltransferase	NNMT	0.00019152	7.93647e+06	9.31195e+07	5.03605e+08	1.01485e+08	5.61402e+08	1112805946	9.28449e+07	1.02374e+08	3.34008e+07	1559400655	7.95787e+07	1.91419e+08	2.25526e+07	1024887005	2.25775e+08	3.97202e+08	1.74202e+08	6.63135e+07	247875621	2.66245e+08	2.39211e+08	3.08003e+07	6.7052e+08	1.68078e+08	2.73772e+08	4.81301e+08	4.38544e+08	4.51496e+08	1.07644e+08	2.77052e+08	1.90759e+08	1.92579e+08	1008155454	1.09762e+08	143938259	4.71666e+06	277188	2.38132e+06	1.38319e+08	2.36153e+06	3.08745e+06	0	2.53296e+08	0	1.98573e+08	1.14154e+06
P40306	Proteasome subunit beta type-10	PSMB10	2.35e-07	2.92269e+06	1.49982e+07	9.27167e+06	1.92986e+07	7.95628e+06	2.4701e+07	2.36474e+07	1.0413e+07	7.72221e+06	1.07476e+07	1.40513e+07	3.27121e+07	5.05862e+06	2.94753e+07	8.6534e+06	2.84491e+07	1.88396e+07	2.04122e+07	1.81507e+07	4.90391e+06	4.85587e+06	7.68324e+06	5.17939e+06	2.20519e+06	5.50002e+06	457635	1.93049e+06	1.35905e+07	2.88402e+06	9.70778e+06	8.56993e+06	4.70648e+06	1.02711e+07	4.48591e+06	1.24584e+07	5.97921e+06	1.1502e+07	7.56163e+06	1.62282e+07	4.55525e+06	3.44693e+06	0	1.32913e+07	0	2.53556e+07	0
P40937	Replication factor C subunit 5	RFC5	8.58e-06	714570	194489	505844	0	1.30298e+06	544922	406087	401990	1.14286e+06	177788	625524	1.3993e+06	1.24679e+06	1.15418e+06	234701	233393	400415	742198	0	797004	0	1.77748e+06	913320	0	371315	2.66981e+06	323574	354524	358548	174893	727804	2.10624e+06	245031	171451	454550	1.21477e+06	7.17404e+06	2.93391e+06	2.58821e+06	5.47615e+06	1.73923e+06	5.43714e+06	0	1.63478e+06	4.91638e+06	4.11248e+06
P40938	Replication factor C subunit 3	RFC3	1.12e-07	1.38144e+06	710625	711221	526169	742400	533788	890942	0	1.22307e+06	0	2.08356e+06	1.36865e+06	758712	2.2881e+06	709586	379637	389979	676438	484644	2.06491e+06	888321	1.18758e+06	580929	406185	452437	1.53484e+06	367527	1.52818e+06	459299	753302	881971	1.46533e+06	0	421415	1.73255e+06	895380	3.08993e+06	3.60029e+06	4.44943e+06	4.6003e+06	5.56616e+06	4.88001e+06	569956	4.26961e+06	2.29779e+06	3.84181e+06
P41217	OX-2 membrane glycoprotein	CD200	5.84e-06	0	0	512024	0	0	0	345979	0	0	0	0	0	1.57957e+06	0	0	0	0	1.92305e+06	0	0	0	388442	0	0	1.66631e+06	0	0	0	0	0	498333	0	857016	0	575891	0	0	0	0	0	0	0	0	0	225446	0
P41218	Myeloid cell nuclear differentiation antigen	MNDA	1.35e-09	594641	1.17168e+06	657299	3.00414e+06	978736	1.23555e+06	1.91327e+06	712368	591788	1.79231e+06	3.17731e+06	144114	0	635722	0	3.60043e+06	2.7247e+06	985077	2.4587e+06	2.92536e+07	737740	109042	522428	1.25909e+06	2.94294e+06	2.3168e+06	1.34656e+06	716401	0	1.65648e+06	3.99721e+06	3.6739e+06	5.33927e+06	4.55366e+06	2.23228e+06	4.86455e+06	91276.5	376481	6.70947e+06	1.08861e+06	351834	0	368344	0	3.03929e+06	166619
P41235	Hepatocyte nuclear factor 4-alpha	HNF4A	0.00143014	2.37839e+06	1.99714e+06	998649	0	3.01912e+06	828856	4.88268e+06	0	4.43575e+06	2.70776e+06	1.89072e+06	1.30171e+06	2.21632e+06	1.01055e+06	1.26551e+06	310513	0	1.03251e+06	467418	0	2.20662e+06	6.04511e+06	3.99928e+06	391509	1.55024e+06	1.16686e+06	356691	4.75221e+06	513617	1.26365e+06	748438	2.20979e+06	0	1.13047e+06	0	413954	5.03782e+06	3.06955e+06	849597	3.69804e+06	1.54011e+06	234136	2.39491e+06	1.23888e+06	2.70924e+06	1.90706e+06
P41240	Tyrosine-protein kinase CSK	CSK	5.4e-12	5.27384e+06	1.21421e+07	6.56872e+06	6.15127e+06	7.11329e+06	2.82415e+06	6.3228e+06	7.9347e+06	1.11225e+07	6.84697e+06	1.37379e+07	4.0725e+06	5.14039e+06	1.02904e+07	5.22712e+06	2.37173e+06	1.2759e+07	2.17542e+06	6.71775e+06	9.49231e+06	4.95321e+06	9.15052e+06	4.97991e+06	3.14362e+06	4.8865e+06	5.68031e+06	9.26864e+06	3.15385e+06	2.9871e+06	4.90075e+06	1.78362e+07	7.53473e+06	5.07042e+06	9.62168e+06	7.56869e+06	1.17048e+07	6.74933e+06	4.69494e+06	1.4056e+07	5.8048e+06	2.19978e+06	1.19591e+07	3.2911e+06	931194	6.70086e+06	5.88729e+06
P41743	Protein kinase C iota type	PRKCI	0.000202819	161333	896173	623647	0	181187	3.63684e+06	148629	0	186422	158558	173365	608664	680947	353223	298043	512041	270627	722985	185949	262262	0	1.62662e+06	531069	0	768873	346316	442361	1.08922e+06	63395.8	873018	1.06764e+06	284185	484786	0	475023	546256	1.96035e+06	569454	1.4938e+06	907488	1.14183e+06	2.19196e+06	708119	427719	1.11869e+06	2.61341e+06
P42229	Signal transducer and activator of transcription 5A	STAT5A	7.83e-07	0	174848	143047	245609	76691.2	149974	33289.6	0	224129	307405	0	28946.5	37568.2	240590	0	0	78625.6	0	149161	66467.4	0	59772	18612.5	0	133647	0	0	69051.5	0	78011.4	775530	172170	128048	0	221251	0	0	0	221761	0	0	0	189435	0	0	0
P42331	Rho GTPase-activating protein 25	ARHGAP25	2.72e-09	153779	1.39052e+06	886543	362576	0	141335	179661	30571.5	1.12363e+06	295889	383206	709702	0	869456	0	0	681275	139106	713270	0	134100	0	0	0	800026	239563	0	0	96714.9	268963	1.36639e+06	284609	1.26617e+06	86798.8	87219.3	144386	0	428071	731289	0	0	0	0	0	409793	0
P42768	Wiskott-Aldrich syndrome protein	WAS	5.76e-10	0	1.24754e+06	1.62677e+06	689603	0	615332	257912	856224	1.75513e+06	851448	1.64289e+06	0	0	1.88122e+06	0	248873	1.20811e+06	242626	720104	1.57999e+06	234183	359316	186053	0	308464	308958	1.18297e+06	0	314872	1.30445e+06	1.23483e+06	448511	1.41765e+06	494850	2.00002e+06	1.08332e+06	0	122805	2.39303e+06	615792	0	0	0	0	0	0
P43007	Neutral amino acid transporter A	SLC1A4	0.00546599	2.39843e+06	313639	751538	471022	3.06273e+06	164582	320576	1.14961e+06	729366	4.07e+06	743118	0	374558	641670	162800	0	114147	0	262074	505780	475240	778684	592698	681524	4.36761e+06	1.63376e+06	1.36394e+06	4.27637e+06	0	1.1683e+06	781704	1.31995e+06	719621	864552	0	1.19715e+06	2.96045e+06	1.17023e+06	2.60126e+06	4.6683e+06	1.23786e+06	4.34208e+06	3.31536e+06	1.17091e+06	715860	1.34535e+06
P43155	Carnitine O-acetyltransferase	CRAT	2e-08	1.8502e+07	4.01583e+07	6.2042e+07	6.16676e+07	7.79657e+07	5.21524e+07	9.23988e+07	102889412	6.9464e+07	4.74393e+07	2.33152e+07	7.69677e+07	5.49902e+07	4.71402e+07	5.69307e+07	1.00119e+08	8.37514e+07	5.66318e+07	5.51758e+07	6.56712e+07	7.11819e+07	1.00516e+08	1.05317e+08	48807639	4.31212e+07	6.65545e+07	7.98217e+07	5.76571e+07	6.35313e+07	3.93703e+07	1.0235e+08	4.8442e+07	7.09247e+07	7.39888e+07	3.15914e+07	1.67075e+08	1.01748e+08	4.38381e+07	2.10504e+07	4.27622e+07	1.12204e+08	8.65661e+07	5.6394e+07	9.98511e+07	1.10875e+08	4.41259e+07
P43246	DNA mismatch repair protein Msh2	MSH2	0.000182843	1.11484e+06	898410	618242	332851	2.97631e+06	3.42517e+06	2.48748e+06	32125	1.66055e+06	83759.9	2.50261e+06	3.53327e+06	1.57038e+06	3.01682e+06	606953	9.7757e+06	1.24484e+06	1.79504e+06	546062	310729	1.49541e+06	4.76134e+06	1.1291e+06	756263	2.52808e+06	5.24416e+06	1.41503e+06	963846	937231	2.90364e+06	5.12574e+06	3.43399e+06	620005	5.29015e+06	4.09442e+06	7.11364e+06	8.9687e+06	1.84564e+07	2.87575e+06	1.13336e+07	9.33999e+06	1.20651e+06	3.73982e+06	939724	3.39036e+06	5.11433e+06
P43403	Tyrosine-protein kinase ZAP-70	ZAP70	2.45e-05	354958	790214	352429	519204	111010	0	0	366894	271338	1.4063e+06	50702.4	891590	0	818911	0	0	727795	0	0	1.38564e+06	1.42755e+06	678443	0	0	0	720025	283796	651777	0	95634.3	64680.8	976534	1.69591e+06	0	862544	0	0	0	567196	0	0	0	0	1.00804e+06	500148	0
P43405	Tyrosine-protein kinase SYK	SYK	1.14e-08	0	1.83027e+06	702459	2.47109e+06	193553	105930	0	1.98934e+06	639431	279134	3.58958e+06	55769	227177	799385	0	405931	555734	248600	752154	981976	0	0	122585	0	874134	0	981045	0	0	427069	785098	844169	803631	207688	1.13942e+06	0	0	154943	1.20468e+06	82385.4	0	0	0	527736	0	0
P45877	Peptidyl-prolyl cis-trans isomerase C	PPIC	2.39e-07	847928	775884	0	0	2.47257e+06	3.12493e+06	579754	1.36199e+06	324406	0	3.4028e+06	1.48941e+06	1.54025e+06	0	0	6.06884e+06	0	2.09557e+06	2.29723e+06	0	0	3.37491e+06	0	0	0	652674	1.69588e+06	2.82039e+06	0	3.62514e+06	2.82116e+06	1.581e+06	0	0	1.99342e+06	698409	2.418e+06	4.60018e+06	0	0	0	257200	0	0	0	2.53308e+06
P45954	Short/branched chain specific acyl-CoA dehydrogenase, mitochondrial	ACADSB	0.000686967	9.6939e+07	399643724	1.0866e+08	4.77174e+08	217044239	1.62797e+08	5.77724e+08	2.15658e+08	1.17206e+08	1.46423e+08	2.39894e+08	2.19362e+08	2.29027e+08	1.3932e+08	3.02606e+08	5.61058e+08	2.0035e+08	3.36021e+08	2.23521e+08	424778108	6.07961e+07	9.70489e+07	3.84715e+08	2.38894e+08	4.85444e+08	6.30968e+08	1.8759e+07	1.16912e+08	3.36197e+08	2.45326e+08	2.14075e+08	1.46026e+08	6.01401e+07	3.4516e+08	247897512	1.0859e+08	2.33588e+08	6.14616e+07	2.87424e+08	1081805234	728849795	1.68186e+08	1.23231e+08	6.04573e+08	4.06403e+08	3.19359e+08
P46087	Probable 28S rRNA (cytosine(4447)-C(5))-methyltransferase	NOP2	0.000687229	0	0	263878	0	989875	4.65757e+06	347963	648492	120354	1.47417e+06	939031	479514	90969.5	540590	236925	1.28593e+06	418753	1.76261e+06	0	689797	2.45797e+06	88466.3	2.87633e+06	484997	3.09989e+06	456413	1.00554e+06	850036	0	0	1.46306e+06	1.21381e+06	0	0	99449.8	0	1.37292e+06	3.82892e+06	5.15817e+06	1.29673e+06	3.72079e+06	1.62374e+06	1.1065e+06	906902	379550	0
P46821	Microtubule-associated protein 1B;MAP1B heavy chain;MAP1 light chain LC1	MAP1B	1.64e-07	155463	1.06727e+06	1.47222e+06	2.5771e+06	324141	654181	723694	232440	162214	654144	648717	200732	56066.4	2.01554e+06	66156.3	249665	0	427137	123725	174330	134731	71944.6	15569.7	26988.3	2.7343e+06	510765	142217	794299	49879.4	1.8488e+06	1.53699e+06	412127	227502	3.38465e+06	3.43676e+06	170342	0	835191	0	79569.1	240942	29150.4	199296	56098.8	498153	77247.2
P46940	Ras GTPase-activating-like protein IQGAP1	IQGAP1	1.05e-15	1.25068e+07	4.06987e+07	4.72341e+07	3.96714e+07	1.69912e+07	1.59942e+07	2.69097e+07	2.63197e+07	5.10348e+07	2.84456e+07	3.31273e+07	1.45522e+07	1.83889e+07	5.03838e+07	8.58724e+06	2.38914e+07	3.82218e+07	2.12886e+07	3.60623e+07	1.78104e+07	1.74847e+07	18766672	1.58843e+07	1.31272e+07	4.33549e+07	1.56318e+07	3.38842e+07	1.16843e+07	8.66416e+06	5.11114e+07	6.08829e+07	2.31969e+07	4.89251e+07	4.15901e+07	6.45253e+07	3.15742e+07	4.84851e+06	4.05997e+07	2.25618e+07	1.56466e+07	8.663e+06	8.58463e+06	1.03639e+07	4.48032e+06	3.87925e+07	8.54291e+06
P46952	3-hydroxyanthranilate 3,4-dioxygenase	HAAO	4.13e-06	4.25558e+07	1.54943e+08	8.42251e+07	2.07315e+08	1.07875e+08	4.54808e+07	2.77169e+08	5.60139e+07	112290481	4.71577e+07	2.66588e+07	9.66573e+07	2.54811e+07	8.91667e+07	1.40948e+08	1.86162e+08	1.43635e+08	1.87801e+08	1.89852e+08	1.41773e+08	6.89141e+07	3.45231e+08	1.13804e+08	8.31318e+07	6.7683e+07	1.50276e+08	8.68942e+07	3.66631e+07	1.56134e+08	5.28354e+07	1.11451e+08	3.33493e+07	3.31004e+06	253569587	7.36276e+07	8.65984e+07	3.64401e+08	2.13083e+08	3.89796e+07	1.32183e+08	2.98835e+08	3.59952e+07	1.9399e+07	1.48716e+08	2.35004e+08	4.54356e+07
P47895	Aldehyde dehydrogenase family 1 member A3	ALDH1A3	4.29e-06	49315.6	1.42565e+06	160626	230444	235796	0	653875	67373.4	602873	186877	1.75216e+06	0	0	2.47341e+06	0	578420	530279	1.00703e+06	79142	54330.7	0	0	0	0	361622	133129	261534	263848	0	1.614e+06	261276	0	96100.8	68916.2	3.60627e+06	103741	0	0	0	0	0	0	0	0	234188	0
P47989	Xanthine dehydrogenase/oxidase;Xanthine dehydrogenase;Xanthine oxidase	XDH	0.00141178	2.27821e+06	4.03869e+07	1.30988e+07	2.88223e+07	7.61593e+07	1.45777e+06	5.71763e+07	1.02185e+07	2.4481e+07	3.45704e+07	3.13611e+07	4.13707e+07	1.31617e+07	6.88881e+06	2.87244e+07	1.02079e+07	8.46411e+07	2.74268e+07	7.17886e+07	3.55839e+07	2.36815e+07	20161041	1.93549e+07	5.01446e+06	3.17684e+06	1.2951e+07	6.67855e+07	2.18244e+07	3.71902e+07	9.6004e+06	5.88508e+06	2.40274e+07	3.49316e+06	3.51589e+07	8.90623e+06	1.37886e+07	1.34139e+08	1.37798e+08	1.5821e+06	4.67768e+07	2.26449e+07	1.91728e+07	3.57002e+07	7.24068e+06	7.40773e+07	7.17506e+06
P48059	LIM and senescent cell antigen-like-containing domain protein 1	LIMS1	4.08e-15	1.01513e+07	1.18986e+07	2.79361e+07	3.89893e+07	6.51389e+06	2.00954e+07	1.41611e+07	4.89485e+06	1.50135e+07	8.16318e+06	1.52873e+07	7.96683e+06	3.84258e+06	2.02156e+07	2.82903e+06	2.05028e+07	1.43784e+07	1.44825e+07	1.03588e+07	9.05816e+06	7.38523e+06	8.42033e+06	1.34082e+07	5.61001e+06	1.79128e+07	1.09699e+07	1.27425e+07	9.73892e+06	9.27537e+06	2.58894e+07	1.82211e+07	7.33398e+06	7.31905e+06	2.2891e+07	2.27811e+07	5.21116e+06	9.89922e+06	1.43847e+07	1.08436e+07	6.45462e+06	1.59142e+07	5.94605e+06	2.7255e+07	9.90869e+06	7.79459e+06	1.54167e+07
P48426	Phosphatidylinositol 5-phosphate 4-kinase type-2 alpha	PIP4K2A	1.05e-10	4.26201e+06	7.25837e+06	3.71715e+06	9.64526e+06	1.11432e+06	5.41575e+06	3.00582e+06	3.33667e+06	8.31317e+06	3.73681e+06	5.99257e+06	4.05799e+06	2.18172e+06	7.87289e+06	759528	1.65822e+06	6.93096e+06	2.62179e+06	3.6618e+06	3.74204e+06	2.21419e+06	1.39885e+06	2.13819e+06	2.72535e+06	4.62397e+06	1.80015e+06	2.41076e+06	906459	2.20089e+06	8.34619e+06	3.95142e+06	3.11968e+06	2.8626e+06	5.93314e+06	9.78723e+06	3.32709e+06	1.30759e+06	3.72998e+06	8.48197e+06	2.59006e+06	1.16941e+06	4.12417e+06	3.33544e+06	2.91796e+06	5.33094e+06	3.28895e+06
P48506	Glutamate--cysteine ligase catalytic subunit	GCLC	0.00011794	5.02318e+07	4.59169e+07	6.04623e+07	3.40035e+07	3.67832e+07	1.86992e+08	4.41858e+07	4.4497e+07	2.92608e+07	4.75282e+07	2.47211e+07	5.5408e+07	7.19756e+07	5.85301e+07	5.6267e+07	8.75585e+07	4.74672e+07	4.88182e+07	3.08591e+07	4.21707e+07	3.11651e+07	6.02852e+07	5.79539e+07	3.85756e+07	6.16854e+07	4.01028e+07	4.10217e+07	3.27048e+07	8.28022e+07	3.69707e+07	8.88021e+07	2.4861e+07	3.71666e+07	4.89532e+07	1.56016e+07	3.91995e+07	3.37017e+07	4.754e+07	3.75938e+07	7.00122e+07	4.61062e+07	2.33588e+07	4.29234e+07	6.64673e+07	3.98377e+07	4.89128e+07
P48634	Protein PRRC2A	PRRC2A	0.00540989	94092.8	164964	294244	0	102577	136856	0	185914	348221	173555	389740	217787	164520	69743	13857.7	119994	81517.8	237952	41106	28173.2	59367.7	204862	151087	131026	329466	113114	366981	19372.8	0	44527.6	268345	137290	0	32037.5	60258.9	11553.1	561505	197285	532189	682167	591385	749660	121012	328453	173593	386139
P48728	Aminomethyltransferase, mitochondrial	AMT	0.000116824	7.97871e+06	1.42645e+07	5.49529e+06	1.19359e+07	2.63276e+07	8.10762e+06	1.56574e+07	1.4145e+07	1.36326e+07	2.24783e+07	1.34182e+07	9.97391e+06	2.74875e+06	5.15575e+06	3.43374e+07	1.18209e+07	640689	8.73368e+06	1.25104e+07	9.84638e+06	7.42357e+06	1.14809e+07	5.72333e+07	8.34688e+06	1.19454e+07	1.33882e+07	2.00086e+07	8.85243e+06	1.88666e+07	1.15814e+07	8.09232e+06	1.0877e+07	2.11927e+07	2.63317e+07	5.00728e+06	2.46766e+07	2.50281e+07	0	1.88209e+07	1.72025e+07	6.97971e+06	8.84991e+06	6.35002e+06	1.41201e+07	4.58789e+06	7.13911e+06
P48729	Casein kinase I isoform alpha	CSNK1A1	0.248771	724709	846972	0	281006	1.51492e+06	4.35254e+06	1.58523e+06	0	856746	467615	504295	890402	2.01325e+06	1.05688e+06	891517	9.5807e+06	526087	1.00204e+06	380810	0	641934	2.90909e+06	1.68976e+06	400711	0	758003	344971	2.98022e+06	167068	4.73438e+06	3.53729e+06	1.11727e+06	0	72601.2	0	0	543339	6.41585e+06	1.91134e+06	1.73839e+06	1.5968e+06	336230	1.75534e+06	879023	381996	2.96316e+06
P48730	Casein kinase I isoform delta;Casein kinase I isoform epsilon	CSNK1D;CSNK1E	0.574751	0	1.23771e+06	266492	0	1.08657e+06	2.08405e+06	219802	0	387802	466323	797689	564295	1.07819e+07	1.40072e+06	616287	541573	139602	271265	766803	701834	318782	0	917511	0	417877	1.03236e+06	0	1.61406e+06	0	123363	4.29247e+06	2.16317e+06	131779	224495	527945	87545.6	1.35039e+06	871441	362210	1.5835e+06	874704	1.11489e+06	1.9165e+06	416495	719338	2.65518e+06
P48960	CD97 antigen;CD97 antigen subunit alpha;CD97 antigen subunit beta	CD97	1.12e-11	0	2.08089e+06	2.45672e+06	2.62869e+06	347108	0	71361.9	425577	1.87883e+06	579187	1.71199e+06	114069	68091.6	1.46793e+06	0	172660	191923	501543	998287	904712	0	0	0	0	2.66937e+06	150104	402255	123840	595879	4.46302e+06	3.70239e+06	397975	1.54733e+06	3.54651e+06	2.69059e+06	638496	146095	3.2394e+06	511047	33270.5	0	0	0	0	3.31377e+06	302650
P49005	DNA polymerase delta subunit 2	POLD2	0.0611002	123186	217454	457468	0	540177	670912	9.80356e+06	0	420983	90169.2	0	1.36209e+06	296619	0	0	191702	344928	144729	0	0	0	399911	128958	259458	60801.1	1.01521e+06	0	0	0	146481	280734	461665	0	379280	0	0	204376	5.08364e+06	289742	6.43166e+06	396246	1.02144e+06	66361.7	120559	2.29022e+06	196222
P49662	Caspase-4;Caspase-4 subunit 1;Caspase-4 subunit 2	CASP4	2.34e-06	223546	450573	241732	742385	1.23375e+06	982278	333980	576144	771748	2.04759e+06	1.11792e+06	848262	296168	1.07792e+06	0	936955	0	781601	0	0	835986	150182	2.38546e+06	329072	51840.6	0	1.24803e+06	489554	0	534224	660094	446167	394700	244003	471229	313888	235355	278465	4.52422e+06	290348	0	0	446679	171377	178597	693784
P49736	DNA replication licensing factor MCM2	MCM2	0.000151803	702096	551801	490300	0	4.79338e+06	875694	2.34204e+06	230823	3.46648e+06	235689	3.51384e+06	8.95872e+06	106000	794580	312566	165750	183457	654543	395825	226228	939561	8.84827e+06	1.85852e+06	72204.3	207411	9.90779e+06	147221	1.27381e+06	90128.4	186547	3.83056e+06	5.69359e+06	222886	69417.3	390104	2.08918e+06	1.74062e+07	3.51898e+07	7.20098e+06	2.71816e+07	1.28746e+07	25594376	557120	9.67949e+06	3.23957e+06	7.70144e+06
P49848	Transcription initiation factor TFIID subunit 6	TAF6	0.00014417	0	0	0	0	0	0	0	0	0	59464.8	351103	0	182843	52361.1	0	0	0	188172	0	0	47640.3	0	390503	0	85774	0	567673	0	0	0	45589	32586.7	0	0	0	88897.9	130953	147343	876028	1.10293e+06	1.38148e+06	154802	93776.7	0	353735	287975
P49916	DNA ligase 3	LIG3	0.532216	41261.5	319002	487118	0	263205	53725.6	54667.9	0	0	391406	1.38221e+08	386322	1.17072e+06	484517	38958	0	64934.4	145035	0	0	333232	925907	1.27077e+06	0	755539	165742	219061	230619	127695	0	238376	250197	0	0	0	198730	1.3631e+06	658558	362652	2.2881e+06	2.5257e+06	665916	700782	1.36768e+06	513884	462505
P49961	Ectonucleoside triphosphate diphosphohydrolase 1	ENTPD1	9.73e-05	443931	3.2778e+06	2.95239e+06	3.38996e+06	0	2.00082e+06	642271	3.59687e+06	2.79473e+06	4.3806e+06	5.09923e+06	1.42659e+06	738675	8.92398e+06	0	4.37978e+06	750531	4.71245e+06	369992	2.60515e+06	454089	539234	239885	1.73804e+06	7.59974e+06	3.11474e+06	2.00124e+06	2.95552e+06	0	3.45092e+06	8.12924e+06	1.68812e+06	2.11166e+06	4.47134e+06	6.68023e+06	478362	0	4.30621e+06	791150	356504	2.68782e+06	0	1.07234e+06	0	2.96602e+06	0
P50053	Ketohexokinase	KHK	2.87e-07	2.29296e+08	1.31867e+08	1.41219e+08	260997310	1.28208e+08	5.65614e+07	3.16832e+08	7.05535e+07	5.22578e+08	7.82841e+07	1.25035e+08	8.3213e+07	1.40934e+08	7.11515e+07	1.50235e+08	1.17848e+08	3.29543e+08	3.22174e+08	1.96271e+08	7.45003e+07	2.38188e+08	1.30071e+08	7.86992e+07	2.40032e+08	4.55201e+07	1.61629e+08	1.51194e+08	1.13388e+08	1.60528e+08	151082973	8.14748e+07	1.011e+08	54571049	2.02458e+08	6.88761e+07	2.21047e+08	3.55938e+08	1.12248e+08	1.69032e+08	1.18254e+08	3.43966e+08	2.06848e+08	3.30959e+08	1.50516e+08	2.78698e+08	1.97832e+08
P50238	Cysteine-rich protein 1	CRIP1	0.00409619	0	0	1.29195e+07	1.4133e+06	8.13184e+06	0	0	0	0	0	1.00192e+06	0	0	5.16122e+06	0	0	0	139714	0	0	3.63998e+06	0	484579	0	0	0	0	0	0	0	1.83095e+06	0	0	734556	2.82619e+07	0	0	0	0	0	0	0	0	0	0	0
P50281	Matrix metalloproteinase-14	MMP14	9.06e-09	0	240497	0	0	0	0	0	0	0	0	232944	604051	0	513963	0	0	161796	0	0	128021	0	0	0	0	222779	278465	0	0	0	0	1.28824e+06	0	0	0	584087	1.16624e+06	145461	0	0	0	0	342486	0	0	0	219740
P50453	Serpin B9	SERPINB9	2.8e-09	1.24499e+07	3.33078e+07	1.9663e+07	1.71273e+07	1.61047e+07	6.57955e+06	3.75796e+06	7.69545e+06	1.25939e+07	9.43728e+06	1.87428e+07	1.03288e+06	8.95353e+06	7.47799e+07	1.21009e+07	8.43979e+06	1.43023e+07	1.11926e+07	2.28849e+07	1.60554e+06	2.10391e+07	1.11244e+07	3.54599e+06	3.95783e+06	1.05098e+07	8.26383e+06	2.38179e+07	1.76894e+07	7.06323e+06	4.35013e+07	2.67356e+07	2.24597e+07	6.28804e+06	1.50098e+07	2.88703e+07	3.64086e+06	1.20836e+07	3.90535e+06	3.54033e+07	5.0454e+06	2.22406e+06	1.78125e+06	3.95318e+07	273579	7.70482e+06	2.05366e+07
P50552	Vasodilator-stimulated phosphoprotein	VASP	5.97e-11	1.1496e+07	3.31976e+07	2.07717e+07	1.18865e+07	6.8245e+06	1.36485e+07	2.12839e+07	9.68623e+06	2.06244e+07	1.2884e+07	1.94056e+07	9.18759e+06	1.93825e+07	1.84829e+07	1.05175e+07	1.53692e+07	4.70892e+07	9.69848e+06	2.07078e+07	2.39999e+07	1.44472e+07	1.91821e+07	8.69985e+06	1.17243e+07	1.21458e+07	1.70635e+07	1.7148e+07	7.44678e+06	7.02298e+06	3.02225e+07	2.36812e+07	2.08056e+07	2.50205e+07	1.07468e+07	1.86925e+07	5.08161e+06	1.42398e+07	2.29917e+07	2.25956e+07	1.18343e+07	1.51762e+07	1.08456e+07	1.23705e+07	8.77024e+06	5.36211e+06	3.8873e+07
P50749	Ras association domain-containing protein 2	RASSF2	0.0091797	0	0	0	181702	0	429718	0	0	0	0	444727	0	0	374491	0	212210	0	0	0	0	0	0	0	0	0	0	0	0	0	449330	0	0	0	125281	197903	0	269308	0	0	0	0	0	0	0	0	0
P50895	Basal cell adhesion molecule	BCAM	0.00079467	5.30764e+06	2.06935e+06	2.13559e+06	8.7381e+06	5.66745e+06	2.18649e+06	1.50853e+06	4.53045e+06	3.68245e+06	1.5753e+07	3.17731e+06	1.63733e+06	0	3.42599e+07	1.77234e+06	3.64609e+06	3.21485e+06	1.2111e+06	2.33061e+06	9.89991e+06	4.18493e+06	4.53279e+06	7.87545e+06	449681	8.377e+06	2.62451e+06	1.16716e+07	3.29764e+06	1.37652e+06	6.0859e+06	1.17808e+07	3.1708e+06	6.33279e+06	6.00857e+06	4.55947e+07	7.87236e+06	5.32966e+06	2.05246e+07	6.16468e+07	1.80333e+06	1.49651e+06	1.67044e+07	2.419e+07	6.7328e+06	6.13114e+06	5.19866e+07
P51003	Poly(A) polymerase alpha	PAPOLA	3.84e-05	1.18823e+06	384782	418546	804474	379386	248500	94395.4	0	352410	167415	1.33258e+06	1.29857e+06	586959	1.0304e+06	667508	0	235220	879275	89394.3	348277	303137	1.11315e+06	883275	212808	941403	1.21421e+06	543826	2.42901e+06	0	0	504341	1.11586e+06	128681	695026	1.04423e+06	308157	1.63812e+06	2.06613e+06	2.59573e+06	3.73846e+06	1.49309e+06	2.32832e+06	270419	974544	741415	2.18715e+06
P51589	Cytochrome P450 2J2	CYP2J2	0.000468426	2.69305e+06	9.02217e+06	1.00866e+06	3.22547e+06	1.2515e+07	2.25894e+06	1.18529e+07	1.661e+06	4.40071e+06	6.27749e+06	3.38143e+06	2.24889e+06	1.0998e+07	438407	5.75505e+06	6.43974e+06	1.15902e+07	5.1325e+06	8.12525e+06	5.90844e+06	7.45358e+06	6.9892e+06	8.9707e+06	6.93141e+06	7.62592e+06	3.02864e+06	5.55566e+06	3.23657e+06	5.95474e+06	801383	3.5793e+06	8.7475e+06	2.8383e+06	1.2361e+07	2.35228e+06	1.82393e+06	4.94244e+06	7.41038e+06	1.0766e+07	5.34182e+06	9.09622e+06	1.2794e+06	1.01215e+06	822867	3.58155e+07	4.18842e+06
P51606	N-acylglucosamine 2-epimerase	RENBP	0.223247	4.7686e+07	3.5373e+06	2.64597e+06	3.22953e+06	741404	104309	1.07465e+06	1.13067e+06	1.15113e+07	2.1251e+06	1.6645e+07	1.44673e+06	1.82064e+06	2.01323e+06	129148	562209	4.08351e+06	0	3.78486e+06	533422	152319	584504	449496	693003	1.12636e+06	576109	1.42776e+06	0	217261	3.15336e+06	3.5755e+06	990478	9.47478e+06	2.46923e+06	3.88749e+06	1.14474e+06	0	1.10327e+06	5.99261e+06	2.0325e+06	159114	0	163167	0	1.34523e+06	88632.6
P51649	Succinate-semialdehyde dehydrogenase, mitochondrial	ALDH5A1	3.58e-07	2.75299e+07	171532748	1.47103e+08	2.05744e+08	5.9531e+08	1.64229e+08	1.4387e+08	1.68997e+08	2.18033e+08	1.67913e+08	1.27072e+08	1.23697e+08	2.43158e+08	1.53593e+08	1.79927e+08	1.65292e+08	1.46561e+08	2.19652e+08	1.92745e+08	2.54175e+08	1.79438e+08	2.16545e+08	3.08753e+08	1.24242e+08	1.81464e+08	105598842	1.91168e+08	160532394	2.54211e+08	1.89323e+08	2.95894e+08	1.24849e+08	7.02348e+07	2.10074e+08	4.85271e+07	1.69862e+08	2.88716e+08	9.9758e+07	7.02019e+07	2.13183e+08	2.2846e+08	6.44903e+07	1.28213e+08	3.08372e+08	6.05048e+07	8.92427e+07
P51654	Glypican-3;Secreted glypican-3	GPC3	0.00270667	628425	0	0	0	118841	114891	0	0	0	1.89393e+06	0	0	1.00019e+06	2.53647e+06	0	0	0	0	0	0	0	450071	3.5925e+06	0	0	0	0	0	0	389805	807909	0	1.04205e+06	0	1.13415e+06	4.69907e+06	538972	2.85759e+06	1.3914e+07	4.59547e+06	2.4438e+06	1.73932e+06	1.90028e+06	2.01213e+06	2.86356e+06	1.23978e+07
P51687	Sulfite oxidase, mitochondrial	SUOX	4.22e-08	5.58573e+07	4.48779e+07	1.4535e+07	3.47009e+07	2.67781e+07	9.55825e+06	1.52178e+07	6.17076e+07	1.81523e+07	1.6429e+07	3.38208e+07	1.66343e+07	7.50991e+07	1.05869e+07	3.27907e+07	1.2429e+07	2.57239e+07	1.84446e+07	4.17131e+07	3.24206e+07	4.54755e+07	1.13079e+07	4.75141e+07	3.19263e+07	1.20587e+07	1.75393e+07	3.00954e+07	1.60356e+07	1.75198e+07	2.0296e+07	1.80808e+07	3.03185e+07	5.23794e+06	5.57783e+07	7.48325e+06	2.85175e+07	3.24424e+07	7.34488e+06	1.07169e+07	1.58782e+07	9.66202e+06	1.99802e+07	3.31165e+06	1.86904e+07	4.12533e+07	1.51035e+07
P51784	Ubiquitin carboxyl-terminal hydrolase 11	USP11	0.00114148	0	0	0	0	0	102700	0	21727.8	0	0	49326.3	0	0	273755	0	143928	0	0	0	0	0	59220	0	0	153974	0	0	0	0	0	209754	0	0	0	133485	338367	197622	0	0	0	0	0	0	0	0	0
P51857	3-oxo-5-beta-steroid 4-dehydrogenase	AKR1D1	4.25e-07	1.02819e+08	2.70553e+08	1.58289e+08	2.76348e+08	4.71484e+08	1.8912e+07	5.21274e+08	1.93725e+08	5.65541e+07	1.22465e+08	4.45628e+08	2.55372e+08	2.36888e+08	1.2075e+08	4.7886e+08	4.6161e+07	253580792	3.5998e+08	3.40025e+08	1.6765e+08	2.41532e+08	3.98901e+08	1.44443e+08	1.1289e+08	1.63344e+08	118793284	1.58432e+08	1.61486e+08	4.07469e+08	6.27144e+07	1.2873e+08	1.39865e+08	3.87547e+07	2.42464e+08	9.00784e+07	1.07502e+08	4.96605e+07	9.66954e+07	8.45714e+07	7.08966e+07	1.23274e+08	9.01342e+07	9.6142e+07	1.36213e+08	3.95009e+07	4.7542e+07
P51884	Lumican	LUM	4.1e-10	3.76474e+06	4.70686e+07	1.91652e+08	3.22013e+08	2.34435e+07	3.56225e+07	2.72557e+07	2.82332e+07	6.06823e+07	1.0552e+07	5.16258e+07	5.89846e+06	2.22485e+07	1.51879e+08	4.17989e+06	9.13286e+07	8.39004e+06	7.28825e+07	4.70062e+07	1.36935e+07	3.36163e+07	2.74809e+07	3.95712e+07	1.34393e+07	1.75105e+08	1.48494e+07	3.28401e+07	5.38005e+07	1.88051e+07	1.77744e+08	1.80789e+08	6.73335e+06	2.56354e+07	7.81129e+07	2.12707e+08	5.964e+06	6.8169e+06	4.2583e+07	2.17614e+07	9.77026e+06	5.16725e+06	569983	1.27042e+07	3.38773e+06	2.50201e+07	5.31458e+06
P51888	Prolargin	PRELP	2.53e-06	0	8.34898e+06	7.21145e+07	1.17116e+08	995960	708458	2.45153e+06	1.18712e+06	1.46349e+07	166424	1.07744e+07	114911	5.38736e+06	9.21839e+07	0	2.89041e+07	1.28262e+06	2.04755e+07	8.05805e+06	1.80796e+06	1.1813e+06	1.02295e+07	5.01659e+06	389677	6.3546e+07	2.28275e+06	9.87052e+06	3.29363e+06	3.11775e+06	5.88343e+07	8.86095e+07	303754	9.35041e+06	3.29136e+07	5.347e+07	436545	0	2.30099e+06	611137	0	287883	0	54607.9	0	633056	0
P51911	Calponin-1	CNN1	0.00232596	0	6.47348e+06	6.31252e+07	7.23528e+07	0	881170	707122	0	1.35738e+06	0	6.46485e+06	0	0	1.11934e+07	0	2.54424e+06	0	2.48169e+06	0	0	0	3.79113e+06	663290	0	2.19052e+07	1.24047e+07	387776	909874	0	6.32825e+07	1.85365e+07	181007	886391	9.08553e+06	1.10507e+08	0	0	4.05689e+06	0	0	388320	0	0	0	139899	0
P51948	CDK-activating kinase assembly factor MAT1	MNAT1	0.119874	0	0	82323.5	0	0	415963	0	0	0	0	2.8565e+06	0	0	145706	0	169721	0	369505	0	0	0	0	0	0	0	0	0	0	0	0	197533	0	0	0	209702	0	213204	389802	160004	365187	501390	301727	143390	0	761336	145590
P52292	Importin subunit alpha-1	KPNA2	0.00234731	794540	1.48871e+06	850251	0	911870	7.09473e+06	0	746439	2.14777e+06	581414	1.05321e+06	7.86062e+06	186736	649366	1.31914e+06	40265	146094	317450	0	1.30906e+06	2.96084e+06	2.28682e+06	6.25986e+06	0	354512	1.71256e+06	526449	3.19461e+06	0	487248	2.09368e+06	2.29881e+06	757093	0	131595	2.82369e+06	6.80035e+06	3.74506e+06	2.98749e+06	2.6674e+06	6.75164e+06	3.29738e+06	262790	1.25943e+06	6.22021e+06	1.37296e+06
P52566	Rho GDP-dissociation inhibitor 2	ARHGDIB	1.01e-15	3.97152e+07	7.09783e+07	1.46698e+08	1.41934e+08	6.21233e+07	2.31432e+07	1.09249e+08	7.81414e+07	1.48504e+08	9.8852e+07	1.10271e+08	4.34945e+07	5.0286e+07	1.80254e+08	2.76421e+07	8.55122e+07	6.97084e+07	7.15504e+07	9.91089e+07	1.28484e+08	1.49573e+08	4.20756e+07	3.77251e+07	4.34811e+07	1.43078e+08	8.11393e+07	8.37849e+07	4.93141e+07	4.62308e+07	1.5542e+08	1.64573e+08	1.62881e+08	1.63025e+08	1.15725e+08	1.37124e+08	8.86331e+07	1.2117e+07	1.26084e+08	1.46216e+08	6.43619e+07	3.29579e+07	2.03461e+07	3.54333e+07	3.0498e+07	9.926e+07	4.09848e+07
P52701	DNA mismatch repair protein Msh6	MSH6	0.000129978	303239	431956	187001	36507.2	1.14214e+06	251633	668732	0	568962	264544	838641	515083	171680	445830	79676.2	181556	397634	101354	0	233843	0	936590	619963	134127	2.76895e+06	2.54197e+06	207022	332295	46060.9	111855	845918	1.18336e+06	121030	30238.1	481144	233835	3.12599e+06	1.0206e+07	1.94305e+06	4.25971e+06	3.28947e+06	547504	328649	390800	3.13367e+06	2.51065e+06
P52757	Beta-chimaerin	CHN2	0.0548538	5.32723e+06	1.18714e+06	2.43324e+06	1.69537e+06	5.9374e+06	2.29475e+06	852435	2.35789e+06	545784	319476	0	229236	9.99051e+06	1.89276e+06	1.13791e+06	0	2.36375e+06	196079	307808	588430	808916	0	1.66218e+06	6.84351e+06	2.20665e+06	4.02093e+06	81475.6	1.4456e+06	5.1661e+06	191583	1.09866e+06	666777	0	2.71303e+06	469492	0	410676	1.06464e+06	706779	1.39432e+06	0	1.22509e+06	79973.3	1.80711e+06	539135	3.54562e+06
P52789	Hexokinase-2	HK2	0.0859739	0	0	0	0	0	1.14701e+06	0	0	0	0	626233	0	0	0	0	0	0	0	0	0	1.32154e+06	0	3.51063e+06	0	0	0	0	0	0	0	0	0	8.85477e+06	0	1.22322e+06	0	0	901085	384600	0	0	0	0	0	480118	1.16187e+06
P52790	Hexokinase-3	HK3	1.91e-05	455993	5.94507e+06	1.12819e+06	3.20121e+06	0	317831	1.66913e+06	223869	7.05575e+06	1.46044e+06	485046	149008	498959	625242	0	1.55446e+06	7.16628e+06	199762	6.2693e+06	6.56487e+06	632827	0	636151	0	0	309401	938658	121307	186298	1.82938e+06	446236	0	1.7639e+06	3.02558e+06	1.2304e+06	1.52455e+06	0	223486	1.10974e+06	222551	0	0	187614	0	686729	0
P52895	Aldo-keto reductase family 1 member C2	AKR1C2	0.000357282	4.61874e+08	1.29369e+08	3.98766e+08	8.35423e+07	4.48297e+08	1.40536e+08	1.36476e+08	339272593	2.93584e+08	4.34806e+07	1.65318e+08	3.74705e+08	3.5488e+08	5.80663e+07	2.13776e+08	3.58917e+08	2.32748e+08	1.75318e+08	2.30163e+08	6.0023e+08	7.23038e+07	3.59969e+08	2.16087e+08	3.49666e+08	2.71339e+08	4.24036e+08	1.04245e+08	1.21957e+08	3.43186e+08	7.89769e+07	5.687e+08	1.02773e+08	4.58206e+08	7.02959e+07	4.65455e+07	4.15702e+07	5.37958e+07	128056842	1.05561e+08	1.70225e+08	7.59577e+07	794281	1.36124e+08	4.09944e+08	5.28185e+07	1.0837e+07
P52948	Nuclear pore complex protein Nup98-Nup96;Nuclear pore complex protein Nup98;Nuclear pore complex protein Nup96	NUP98	2.06e-06	314507	741408	396644	1.0198e+06	320584	1.13359e+06	623629	49389.7	276496	953958	1.02874e+06	1.46048e+06	884207	1.7324e+06	178609	1.03853e+06	1.45762e+06	1.04472e+06	112901	346259	214941	396491	1.18726e+06	638168	1.37621e+06	256697	501750	989369	34211.1	336962	1.20159e+06	1.16026e+06	31479.8	509392	395080	457948	932029	2.22605e+06	2.75471e+06	942820	2.74986e+06	1.70128e+06	1.74023e+06	1.03177e+06	476088	1.51152e+06
P53004	Biliverdin reductase A	BLVRA	1.88e-10	5.97446e+07	1.1278e+07	2.2779e+07	1.03294e+07	6.01263e+06	1.52503e+07	5.674e+06	6.03029e+06	8.54853e+06	1.66919e+07	5.38026e+07	1.32989e+07	5.51036e+06	1.45299e+07	2.8326e+06	9.13096e+06	8.66036e+06	3.41065e+07	13099876	3.96968e+07	4.21464e+06	1.10936e+07	3.07285e+06	4.41655e+06	7.55691e+06	2.72885e+07	9.96167e+06	6.23013e+06	153515	2.38865e+07	1.85129e+07	7.65747e+06	1.87264e+07	1.12523e+07	2.10579e+07	1.60058e+07	622217	3.58766e+07	3.02847e+07	4.32167e+07	1.2339e+06	1.66511e+06	4.48866e+07	837240	8.43765e+06	4.73714e+07
P53370	Nucleoside diphosphate-linked moiety X motif 6	NUDT6	4.04e-05	1.3415e+06	1.13455e+06	1.20497e+06	1.49837e+06	2.65621e+06	5.88953e+06	1.3716e+06	8.27218e+06	1.75321e+06	929343	1.15829e+06	6.13266e+06	3.19298e+06	397552	3.32068e+06	6.36985e+06	1.82029e+06	1.45668e+06	3.64381e+06	3.211e+06	1.83296e+06	0	1.13991e+06	6.27293e+06	2.4777e+06	2.53011e+06	2.1531e+06	2.0361e+06	2.21223e+06	0	750894	8.55533e+06	1.53514e+06	2.37007e+06	275697	1.54713e+06	1.07985e+06	0	202316	1.15481e+06	3.8315e+06	929122	996141	1.92624e+06	1.08182e+07	0
P53634	Dipeptidyl peptidase 1;Dipeptidyl peptidase 1 exclusion domain chain;Dipeptidyl peptidase 1 heavy chain;Dipeptidyl peptidase 1 light chain	CTSC	1.75e-06	721791	7.50493e+06	1.86417e+06	9.41289e+06	1.79972e+06	4.17615e+06	3.87902e+06	5.92252e+06	3.16611e+06	1.76706e+07	8.47757e+06	1.34478e+07	2.47064e+07	9.87383e+06	2.193e+06	9.86602e+06	6.69135e+06	1.11775e+07	6.19721e+06	2.3352e+07	7.84308e+06	537132	5.87348e+06	2.47118e+06	8.99258e+06	889721	3.65174e+06	4.65599e+06	961849	2.43013e+06	2.04525e+07	2.88434e+07	2.18771e+07	4.17768e+06	1.46764e+07	1.44795e+07	869227	1.04349e+07	3.32857e+07	4.34032e+06	785412	1.81238e+06	3.68817e+06	7.03171e+06	1.20664e+07	3.99074e+06
P54289	Voltage-dependent calcium channel subunit alpha-2/delta-1;Voltage-dependent calcium channel subunit alpha-2-1;Voltage-dependent calcium channel subunit delta-1	CACNA2D1	0.000575495	1.96308e+06	1.50114e+06	1.32256e+06	3.04176e+06	211775	119534	0	241105	2.96372e+06	185870	328075	23937.3	0	2.73402e+06	0	726692	2.56104e+06	0	408825	553742	0	0	162064	0	1.08087e+06	49342.8	63383.3	0	0	867350	1.66651e+06	0	0	1.69745e+06	4.34186e+06	0	0	102377	0	0	42048.1	0	0	0	57272.8	0
P54687	Branched-chain-amino-acid aminotransferase, cytosolic	BCAT1	0.00204983	0	865700	694425	0	0	0	0	0	0	276935	202894	135876	92880.7	190992	0	0	0	0	0	0	0	0	235791	0	804506	0	0	0	0	0	2.30897e+06	0	214424	0	229779	227545	0	635722	1.97286e+07	171839	0	0	115087	0	1.02839e+06	0
P54709	Sodium/potassium-transporting ATPase subunit beta-3	ATP1B3	3.68e-08	6.56398e+06	1.81978e+06	5.39865e+06	7.15403e+06	1.25274e+06	2.64452e+06	281022	667975	2.07156e+06	6.59027e+06	9.94449e+06	548360	0	8.61442e+06	2.91161e+06	1.46211e+06	661575	1.3032e+06	236627	6.8732e+06	0	1.45147e+06	2.67649e+06	0	6.56861e+06	1.28401e+06	3.57248e+06	6.74152e+06	238140	2.00133e+06	1.68266e+07	3.13057e+06	513340	263298	6.2465e+06	1.25781e+07	735935	9.50376e+06	2.81998e+06	6.03321e+06	7.2901e+06	4.8149e+07	1.47422e+06	2.79449e+06	5.85387e+06	1.40486e+06
P54840	Glycogen [starch] synthase, liver	GYS2	7.32e-08	3.89435e+06	1.86882e+07	1.90863e+07	4.41944e+07	2.12608e+07	9.1846e+06	3.53729e+07	2.40619e+07	1.35635e+07	3.06888e+07	1.08501e+06	2.06793e+07	9.15267e+06	9.00137e+06	4.06501e+07	1.99403e+07	1.43214e+08	5.14626e+07	7.5681e+07	6.85582e+07	7.94622e+07	1.00538e+07	1.8639e+07	3.73619e+07	1.47805e+07	6.45713e+07	3.86465e+07	2.72739e+07	3.00336e+07	7.55952e+06	1.57995e+07	3.13434e+07	5.64964e+06	4.96315e+07	6.38998e+06	9.01698e+06	4.01535e+06	6.94691e+06	1.99292e+07	1.47344e+06	778070	1.97444e+06	228966	1.64081e+06	1.17795e+07	0
P54855	UDP-glucuronosyltransferase 2B15	UGT2B15	0.000116681	1.31898e+07	2.62051e+07	1.75462e+07	5.11267e+07	5.21308e+07	4.07253e+07	5.291e+07	3.89454e+07	2.08751e+07	2.3984e+07	2.32632e+07	1.38112e+08	6.07779e+07	3.04676e+07	2.36975e+07	3.85369e+07	3.83625e+07	4.59656e+07	4.02491e+07	143097542	1.55008e+07	2.29208e+07	2.80674e+07	1.50784e+07	2.68605e+07	3.029e+07	5.96407e+07	5.93722e+07	4.24644e+07	6.10157e+06	6.04952e+07	5.97514e+07	2.78396e+07	5.12868e+07	5.64073e+07	4.97057e+07	2.84003e+07	3.75367e+06	5.86152e+06	6.1052e+07	4.31113e+07	5.55689e+06	6.31844e+07	6.67627e+07	1.30663e+07	2.19721e+06
P54868	Hydroxymethylglutaryl-CoA synthase, mitochondrial	HMGCS2	1.05e-05	7.15643e+07	1575831669	7.92324e+08	1527646035	1264560761	2.21481e+08	1993897599	7.89044e+08	3189511151	1936440642	1912918471	1275495805	6.75662e+08	3.44366e+08	2357870222	4.25829e+08	1438308399	1166987731	1705478841	634773653	1608140454	1179882758	2575092480	697683813	5.44786e+08	2841654798	2825701276	8.82118e+08	9.97163e+08	2916725051	1160375606	2581174734	1571156672	1536374402	1235375569	1174097071	1351731965	2936403430	1264668895	2625057305	2095102076	3303131185	5.95438e+08	9.53955e+08	2130245490	9.62249e+08
P54922	[Protein ADP-ribosylarginine] hydrolase	ADPRH	7.4e-10	126596	141434	315419	0	0	0	402190	0	0	0	0	0	0	0	0	0	0	492701	207455	0	0	248166	0	0	0	340928	0	165461	0	573506	997589	142059	409579	0	0	0	0	147919	805164	456721	0	0	199710	0	0	1.24482e+06
P55008	Allograft inflammatory factor 1	AIF1	1.11e-07	6.23309e+06	2.45764e+07	7.52329e+06	1.92679e+07	5.84212e+06	1.66426e+07	6.91895e+06	2.64534e+06	1.32799e+07	2.1066e+07	2.46278e+06	0	1.63638e+06	1.97849e+07	2.33556e+06	1.47822e+06	2.45048e+07	6.30899e+06	1.51716e+07	2.38097e+07	3.5599e+06	2.90558e+06	3.88279e+06	2.70792e+06	7.08302e+06	1.6121e+06	7.99727e+06	2.06673e+06	1.67862e+06	1.57395e+07	9.85326e+06	1.27565e+07	1.19963e+07	1.90107e+07	3.05351e+07	1.47088e+07	0	1.28133e+07	9.43116e+06	2.08665e+06	344267	0	1.11915e+06	0	2.45178e+06	0
P55011	Solute carrier family 12 member 2	SLC12A2	0.00765887	45697.5	0	83451.7	157581	0	0	263644	135489	17275.4	37671.6	186081	0	233885	248550	238253	860360	62065.6	118896	74882.5	391881	0	0	0	0	306760	0	260247	415882	308288	122730	1.27368e+06	562082	0	639697	914177	250220	58627.9	870412	1.16782e+06	623135	0	0	826884	0	241500	294800
P55056	Apolipoprotein C-IV	APOC4	0.00580928	2.31887e+06	3.38118e+06	1.70039e+07	1.11622e+06	0	1.24513e+07	9.99617e+06	1.80144e+07	1.94328e+07	0	7.68151e+06	3.65716e+06	2.9446e+07	4.5478e+06	731551	2.15948e+06	620427	0	3.12722e+06	0	3.40743e+06	493106	0	1.35761e+07	2.06068e+07	5.79209e+06	7.49202e+06	506083	1.3375e+07	2.79035e+06	1.56994e+07	961221	0	5.31524e+06	3.22617e+06	0	0	1.44933e+06	0	1.8233e+06	3.61573e+06	408311	0	1.12018e+07	2.04724e+07	0
P55058	Phospholipid transfer protein	PLTP	0.0180231	0	0	1.84493e+06	0	0	0	0	0	0	0	0	0	0	160981	0	0	0	0	0	0	0	0	0	0	0	0	0	1.30748e+06	0	254825	0	0	128359	0	803457	0	0	0	0	0	0	0	0	0	64176	0
P55157	Microsomal triglyceride transfer protein large subunit	MTTP	4.4e-08	2.27443e+08	1.1909e+08	1.072e+08	1.769e+08	1.68241e+08	1.49243e+08	2.48575e+08	1.9087e+08	8.8963e+07	1.65827e+08	3.37079e+07	1.94085e+08	1.20744e+08	1.16957e+08	1.8193e+08	8.01001e+07	1.80979e+08	1.38992e+08	1.73713e+08	1.06728e+08	1.41928e+08	5.91096e+07	2.51024e+08	1.6579e+08	1.18798e+08	7.71308e+07	271984292	1.91484e+08	169281605	1.0451e+07	1.29893e+08	1.38685e+08	3.43386e+07	2.2477e+08	6.97395e+07	2.92104e+08	1.48293e+08	2.19743e+07	6.87015e+07	5.25775e+07	9.59626e+07	4.46394e+07	1.02816e+08	8.67096e+07	1.03603e+08	1.57919e+07
P55160	Nck-associated protein 1-like	NCKAP1L	1.03e-06	98261.7	459017	331260	458893	68733.1	283664	77736.3	379840	1.00814e+06	385209	360208	1.1301e+06	83183.2	615635	0	395897	462715	481977	872251	835928	101730	94411.1	78922.2	149782	223107	40503	452559	74320.3	48963.6	813908	1.0022e+06	530915	990962	308385	766237	483486	0	318031	540275	181934	0	0	39197.9	0	548252	19509
P55789	FAD-linked sulfhydryl oxidase ALR	GFER	0.00043395	3.40483e+06	1.16892e+06	5.35912e+06	4.26151e+06	7.35353e+06	1.69142e+06	6.36417e+06	2.66506e+06	4.5524e+06	2.26489e+06	1.0189e+07	6.46637e+06	6.69722e+06	3.40473e+06	0	1.02762e+06	2.737e+06	6.19663e+06	6.76509e+06	1.86463e+07	5.88892e+06	6.66769e+06	1.51815e+07	3.35937e+06	2.46171e+06	5.18953e+06	4.95941e+06	4.68861e+06	7.09521e+06	0	1.26832e+07	6.85006e+06	2.12522e+06	6.5882e+06	531256	0	7.27059e+06	848645	7.03849e+06	9.16094e+06	4.53068e+06	840797	0	7.95743e+06	1.55576e+07	4.09783e+06
P55809	Succinyl-CoA:3-ketoacid coenzyme A transferase 1, mitochondrial	OXCT1	0.131691	0	0	960247	6.19251e+06	390532	0	1.24903e+06	0	0	0	980852	0	395535	1.23596e+06	0	0	332858	0	302855	288238	0	0	0	0	93537.3	120133	0	439372	1.19043e+06	1.99904e+06	906019	0	0	2.82284e+06	2.4388e+06	0	456325	1.60246e+07	2.00896e+06	0	74199	0	0	1.07214e+07	495075	0
P56545	C-terminal-binding protein 2	CTBP2	0.00117508	0	0	0	419978	0	0	0	0	290146	0	192880	0	0	416697	0	0	0	0	0	283218	0	0	0	0	0	0	0	0	0	420796	574777	0	0	0	0	968337	0	0	0	0	184476	0	0	0	0	0
P57081	tRNA (guanine-N(7)-)-methyltransferase non-catalytic subunit WDR4	WDR4	0.0349035	144889	111323	0	0	185840	1.44814e+06	199676	179021	5.39457e+06	283525	145233	0	0	140406	0	99166.2	0	0	0	195430	1.878e+06	0	266059	0	1.44567e+06	216717	0	353449	0	0	718809	0	144625	0	125880	0	0	230574	1.10267e+06	326576	3.33969e+06	385058	294726	311027	911601	165383
P57678	Gem-associated protein 4	GEMIN4	0.00143056	0	89934.8	0	0	0	65571.4	0	0	0	0	391748	264947	0	0	0	0	0	0	0	0	0	0	167951	83627.2	235259	292291	0	0	0	0	229348	123723	0	0	114339	59525.6	0	313504	109552	223237	425195	0	14885.1	38592.7	64663.4	59191.1
P57737	Coronin-7	CORO7	2.57e-15	1.33064e+06	6.80495e+06	7.3365e+06	4.20158e+06	2.39578e+06	3.62422e+06	4.34078e+06	2.84772e+06	6.2184e+06	4.13519e+06	3.55067e+06	4.82551e+06	2.68244e+06	8.44836e+06	680349	2.87569e+06	6.13526e+06	3.34e+06	6.77448e+06	4.3838e+06	1.88451e+06	1.1333e+06	4.23537e+06	1.33269e+06	7.45704e+06	1.64337e+06	4.21373e+06	3.87409e+06	1.52066e+06	7.65008e+06	8.29281e+06	7.17777e+06	9.78162e+06	4.70295e+06	7.92393e+06	4.94557e+06	324982	7.43637e+06	6.64063e+06	8.05742e+06	2.23531e+06	580016	1.5721e+06	2.2622e+06	5.21305e+06	4.87799e+06
P57740	Nuclear pore complex protein Nup107	NUP107	6.05e-06	176143	304800	205536	563754	641604	1.78808e+06	379642	600533	511714	255727	1.2361e+06	1.67173e+06	484954	819821	220000	123895	615018	934023	232370	1.21286e+06	543959	588162	780810	430398	1.96201e+06	286259	430250	523141	220958	469090	1.78386e+06	867630	0	384058	0	559183	912913	1.84438e+06	1.40192e+06	1.2804e+06	2.32309e+06	2.41886e+06	1.46309e+06	1.11361e+06	535339	1.64644e+06
P59666	Neutrophil defensin 3;HP 3-56;Neutrophil defensin 2;Neutrophil defensin 1;HP 1-56;Neutrophil defensin 2	DEFA3;DEFA1	7.24e-05	1.98014e+07	9.87706e+06	2.22283e+07	5.77828e+07	0	3.72162e+07	4.78834e+07	3.67552e+06	2.15935e+07	2.76082e+07	6.43561e+06	5.35152e+06	0	6.99452e+06	1.54531e+07	3.6196e+07	5.4676e+07	2.48598e+07	2.48989e+07	1.36891e+08	8.9166e+06	0	2.95404e+07	1.29512e+07	4.02909e+07	9.72121e+07	4.06431e+07	2.13809e+07	2.43625e+07	3.91502e+07	2.39848e+07	5.52116e+07	1.0344e+08	6.0554e+07	2.49299e+07	1.27222e+07	3.67912e+06	1.05285e+07	1.93355e+08	0	2.12387e+07	3.1029e+07	3.10775e+07	7.36881e+06	0	0
P59768	Guanine nucleotide-binding protein G(I)/G(S)/G(O) subunit gamma-2	GNG2	1.6e-10	1.55772e+06	6.98648e+06	1.37499e+07	2.29594e+07	3.59076e+06	1.45981e+07	4.37189e+06	6.60273e+06	1.59439e+07	1.39601e+07	4.74823e+06	2.12768e+06	7.20201e+06	2.59689e+07	0	2.24405e+07	1.55442e+07	5.92484e+06	1.30808e+07	1.44731e+07	0	4.09372e+06	0	4.96067e+06	9.72166e+06	6.22647e+06	3.66865e+06	2.0569e+06	3.11311e+06	2.17981e+07	5.74417e+06	5.36516e+06	9.01689e+06	1.13073e+07	2.3701e+07	3.59011e+06	0	1.67648e+07	9.44293e+06	4.25515e+06	1.98361e+06	0	1.94246e+06	1.75104e+06	1.43829e+07	0
P61225	Ras-related protein Rap-2b	RAP2B	8.1e-11	4.1312e+06	777780	7.22868e+06	3.12951e+06	3.93272e+06	6.20301e+06	3.43132e+06	6.65601e+06	7.90146e+06	2.29646e+06	5.9659e+06	2.33782e+06	7.37326e+06	6.92216e+06	2.52215e+06	3.63791e+06	1.21647e+07	5.67617e+06	6.0523e+06	6.99757e+06	2.72721e+06	4.44682e+06	3.26994e+06	3.84903e+06	9.45258e+06	0	1.5855e+06	3.43993e+06	0	8.50431e+06	8.82408e+06	3.66568e+06	7.74287e+06	4.95818e+06	1.02283e+06	1.32974e+07	4.80636e+06	9.78307e+06	8.70089e+06	6.68762e+06	3.93764e+06	3.58581e+06	3.27082e+06	4.53496e+06	1.04895e+07	4.00395e+06
P61599	N-alpha-acetyltransferase 20	NAA20	0.00300824	0	529026	0	0	0	0	0	413287	0	1.689e+06	1.20362e+06	0	0	0	0	0	0	0	0	0	0	0	0	0	0	616699	214807	0	0	0	1.57515e+06	884738	0	0	0	1.68035e+06	729545	695817	0	1.10548e+06	353846	910457	0	0	1.37454e+06	1.74403e+06
P61626	Lysozyme C	LYZ	2.96e-07	3.51359e+06	5.16134e+06	15015353	1.70216e+07	3.8776e+06	3.18692e+06	5.9964e+06	3.75743e+06	2.13499e+06	1.55144e+07	0	1.01801e+06	4.30347e+06	9.17722e+06	1.73582e+06	0	1.65822e+07	5.87242e+06	9.97944e+06	1.0585e+08	1.69883e+06	1.29188e+06	7.48585e+06	3.67264e+06	1.64498e+07	7.41468e+06	7.12906e+06	0	3.36431e+06	6.18698e+06	1.10666e+07	1.11991e+07	2.40356e+07	1.8984e+07	1.04252e+07	5.47983e+06	2.75983e+06	1.63339e+06	4.82925e+07	4.34521e+06	416915	6.99299e+06	1.61835e+07	5.54311e+06	891161	756877
P61964	WD repeat-containing protein 5	WDR5	3.49e-07	2.54954e+06	1.91217e+06	5.55502e+06	1.90692e+06	408698	1.30913e+06	2.11796e+06	1.86708e+06	1.46058e+06	2.64039e+06	2.49568e+06	1.8078e+06	2.22868e+06	3.2561e+06	796108	3.45702e+06	2.19169e+06	3.04185e+06	341951	1.04765e+06	1.70115e+06	877315	1.38827e+06	2.22903e+06	1.8355e+06	2.61529e+06	599809	1.30907e+06	135354	3.68778e+06	1.78576e+06	2.87785e+06	418496	996526	2.53963e+06	1.36019e+06	2.67513e+06	8.13275e+06	7.54211e+06	5458180	1.47916e+07	4.73348e+06	5.95225e+06	7.77733e+06	5.64105e+06	6.17335e+06
P62487	DNA-directed RNA polymerase II subunit RPB7	POLR2G	1.36e-06	0	0	0	0	319493	518433	447010	0	0	0	765439	530653	0	2.25412e+06	297502	601029	0	0	0	0	362944	0	933046	1.74449e+06	811786	0	1.8307e+06	421169	0	0	1.06882e+06	344347	0	0	709829	0	0	1.05933e+06	882170	761694	3.22235e+06	639066	1.04225e+06	738078	1.26088e+06	691079
P62760	Visinin-like protein 1	VSNL1	4.33e-05	1.56672e+07	1.16602e+07	3.9607e+06	1.70873e+07	2.36886e+07	1.67856e+07	1.7882e+07	1.06394e+07	1.12251e+07	0	4.8655e+06	1.74176e+07	1.79856e+07	8.65765e+06	1.80892e+07	8.63006e+06	2.89824e+07	539601	1.08002e+07	2.28521e+07	1.19345e+07	3.47116e+06	1.13352e+07	4.91596e+06	2.14087e+07	1.14574e+07	4.40193e+06	1.12282e+07	2.25059e+07	6.68552e+06	1.18084e+07	1.51062e+07	2.64035e+06	1.62493e+07	1.68821e+07	2.70638e+07	4.97613e+07	5.80249e+06	3.09978e+07	1.73017e+07	2.06623e+07	1.04612e+08	1.23277e+06	4.21305e+07	6.99528e+06	1.3581e+07
P63172	Dynein light chain Tctex-type 1	DYNLT1	7.89e-07	959310	1.32121e+07	3.61686e+06	4.56739e+06	0	2.62952e+06	3.20003e+06	1.7124e+06	5.08954e+06	4.00158e+06	0	6.4034e+06	1.81848e+06	9.81267e+06	5.91078e+06	7.03525e+06	3.44216e+06	6.55296e+06	6.80925e+06	1.58176e+06	4.20975e+06	4.13546e+06	409960	3.71417e+06	0	2.60022e+06	4.48696e+06	587323	1.22866e+06	4.35012e+06	1.19629e+07	1.32146e+06	6.98843e+06	4.79661e+06	6.88021e+06	10046087	930826	0	8.95995e+06	4.07323e+06	560010	1.36503e+07	0	610868	0	7.97482e+06
P63313	Thymosin beta-10	TMSB10	0.0109625	1.01087e+07	1.38566e+07	0	1.27477e+07	0	3.37869e+08	0	2.45162e+07	0	8.15378e+06	5.0983e+07	0	0	2.17311e+07	0	2.55597e+08	1.79769e+07	1.70422e+08	0	0	0	0	0	0	4.19684e+07	0	0	1.59666e+07	0	0	5.22786e+07	2.25578e+07	0	0	2.58599e+07	0	7.26151e+06	1.6068e+07	2.68575e+07	0	2.07803e+08	0	2.71073e+08	0	1.40513e+07	2.74056e+07
P67936	Tropomyosin alpha-4 chain	TPM4	9.3e-13	2.64777e+07	1.44484e+08	2.15051e+08	2.54814e+08	5.57015e+07	6.13623e+07	6.06757e+07	5.11158e+07	9.96369e+07	5.78921e+07	1.27374e+08	4.33338e+07	4.05679e+07	1.9131e+08	1.84575e+07	6.70734e+07	5.11104e+07	1.45649e+08	9.85589e+07	5.1054e+07	7.69328e+07	5.34259e+07	3.35755e+07	3.97553e+07	3.04161e+08	6.31715e+07	5.45731e+07	6.02103e+07	4.79398e+07	3.04529e+08	2.51268e+08	3.98958e+07	1.32419e+08	1.60653e+08	3.06311e+08	3.8193e+07	3.46601e+07	1.05604e+08	2.883e+07	3.84884e+07	3.19934e+07	1.10837e+07	5.38628e+07	2.55607e+07	6.93571e+07	3.35672e+07
P78329	Phylloquinone omega-hydroxylase CYP4F2	CYP4F2	2.27e-05	3.19037e+07	3.81275e+07	4.9212e+07	4.49379e+07	4.41086e+07	1.95611e+07	5.88312e+07	6.15654e+07	3.56456e+07	1.99171e+07	2.58175e+07	5.09964e+07	165530736	34530717	4.05708e+07	6.96488e+07	3.96974e+07	4.24667e+07	5.71417e+07	1.46652e+07	3.09755e+07	2.61985e+07	3.29518e+07	3.78204e+07	5.72291e+07	6.21044e+07	1.00497e+08	3.15151e+07	4.66207e+07	1.01708e+07	1.42884e+07	1.57175e+07	4.6628e+06	9.83477e+07	3.3665e+07	2.71426e+07	6.72734e+07	4.55379e+07	6.96696e+06	1.13472e+07	3.22132e+07	1.86818e+07	2.0702e+07	5.00631e+07	5.92077e+07	1.14127e+07
P78330	Phosphoserine phosphatase	PSPH	0.000534389	1.13296e+08	1.25631e+07	3.30566e+06	2.19015e+06	9.81566e+06	3.48645e+06	6.19755e+06	4.2331e+06	1.04118e+07	8.40182e+06	2.18635e+07	3.51389e+06	2.70116e+07	7.06772e+06	1.56491e+07	1.56534e+07	1.08587e+07	4.34239e+07	4.3674e+06	5.58122e+06	869550	4.70791e+06	1.65251e+06	7.02605e+06	1.55852e+07	8.41545e+07	5.97525e+06	6.35908e+06	3.40103e+06	5.20237e+06	1.71086e+07	1.64903e+06	1.70299e+06	2.88642e+06	1.65736e+07	5.44582e+07	2.29288e+06	3.53078e+07	2.06744e+07	9.44246e+07	5.18992e+06	8.58085e+07	1.36703e+06	1.37247e+07	1.10801e+07	1.993e+07
P78346	Ribonuclease P protein subunit p30	RPP30	5.54e-07	288395	0	0	395237	1.29814e+06	675815	716127	412636	652131	2.08506e+06	270242	1.93604e+06	1.59709e+06	723226	0	535168	1.20114e+06	2.01094e+06	178900	708041	358077	1.35979e+06	384979	285707	1.95809e+06	940924	1.19256e+06	1.13469e+06	0	198002	1.97193e+06	3.24646e+06	0	0	624588	809376	268114	2.38637e+06	3.09711e+06	2.29444e+06	3.56591e+06	4.19694e+06	820473	1.23608e+06	662839	3.12465e+06
P78406	mRNA export factor	RAE1	2.54e-05	1.83957e+06	1.61719e+06	4.17481e+06	0	1.65873e+06	1.23374e+07	761962	968259	897148	983752	4.92693e+06	2.27882e+06	798725	1.52652e+06	1.05335e+06	8.97756e+06	2.33147e+06	5.42086e+06	825071	3.48871e+06	4.8686e+06	557631	3.0979e+06	639983	2.11353e+06	920470	1.77828e+06	3.04377e+06	2.04275e+06	471665	2.34259e+06	4.21177e+06	0	3.97387e+06	513275	2.68101e+06	6.82633e+06	4.11339e+06	7.15224e+06	5.72231e+06	8.27325e+06	1.72947e+06	4.27082e+06	1.83957e+06	3.77095e+06	922770
P78537	Biogenesis of lysosome-related organelles complex 1 subunit 1	BLOC1S1	1.96e-06	3.53541e+06	1.19799e+06	1.5357e+06	0	0	0	0	584349	566845	1.73785e+06	1.06508e+06	3.55857e+06	1.3099e+06	3.19609e+06	0	603338	1.73564e+06	5.39554e+06	0	1.73524e+06	0	0	1.01286e+06	0	1.8258e+06	3.65784e+06	1.05684e+06	1.50557e+06	0	2.56313e+06	3.33277e+06	1.05639e+06	609409	0	2.55928e+06	2.40237e+06	0	2.15555e+06	3.85542e+06	2.13021e+06	8.39374e+06	2.70204e+06	6.60505e+06	3.9077e+06	883869	5.16741e+06
P80404	4-aminobutyrate aminotransferase, mitochondrial	ABAT	5.25e-10	2.63383e+08	322319193	4.32732e+08	8.46843e+08	7.85482e+08	2.46048e+08	1018289425	6.65895e+08	5.77874e+08	3.18106e+08	4.22593e+08	7.27418e+08	8.88084e+08	6.5688e+08	4.67327e+08	6.85967e+08	6.23571e+08	4.47411e+08	6.68933e+08	7.01409e+08	7.60225e+08	8.48124e+08	9.23272e+08	9.32758e+08	7.08157e+08	7.71993e+08	6.94945e+08	5.18857e+08	6.46239e+08	2.96479e+08	4.72034e+08	4.75294e+08	1.65164e+08	7.88898e+08	8.14316e+08	4.45756e+08	7.34527e+08	3.38829e+08	1.43552e+08	4.1286e+08	5.5746e+08	2.51563e+08	2.91628e+08	8.96982e+08	683094637	7.42463e+07
P80723	Brain acid soluble protein 1	BASP1	5.89e-08	4.58676e+06	3.77295e+07	3.23367e+07	4.77498e+07	4.81862e+06	1.20746e+06	1.54601e+07	1.79273e+07	6.19791e+07	1.83969e+07	3.5747e+07	3.13702e+06	1.21944e+07	4.72377e+07	3.39272e+06	1.70662e+06	3.07007e+07	3.76223e+06	3.57172e+07	3.92559e+07	4.23697e+06	5.9951e+06	3.54182e+06	6.06046e+06	4.23916e+07	5.00198e+06	1.83647e+07	1.41813e+07	1.03047e+07	5.29429e+07	4.13814e+07	1.55264e+07	3.18784e+07	2.19392e+07	6.87195e+07	1.70095e+07	1.12302e+06	1.35246e+07	1.91478e+07	4.64225e+06	265023	0	308879	0	1.46938e+07	521026
P80748	Ig lambda chain V-III region LOI	0	0.00540758	946656	1.50613e+07	1.71001e+07	2.93196e+07	7.55915e+06	1.40966e+08	0	6.67449e+06	1.56132e+07	1.82476e+07	1.11524e+07	2.41273e+07	3.71048e+06	1.39948e+07	2.17553e+06	1.19651e+07	2.84382e+06	4.84206e+07	2.90442e+06	1.07544e+06	1.91636e+07	2.76624e+06	0	2.56688e+07	1.83418e+07	1.387e+07	1.53876e+07	2.11882e+07	559475	8.79129e+07	1.67607e+07	2.0507e+07	1.06998e+07	6.28594e+06	4.32423e+07	3.77214e+07	1.69733e+07	3.28142e+07	1.81272e+07	735513	1.73269e+07	8.11613e+06	199019963	1.0901e+06	694839	19687575
P82675	28S ribosomal protein S5, mitochondrial	MRPS5	0.00113411	1.07376e+06	828650	318105	551419	3.12017e+06	6.49268e+06	1.8583e+06	1.76768e+06	346775	2.61594e+06	1.86144e+06	4.55145e+06	1.05116e+06	982835	733704	2.55908e+06	1.36042e+06	4.27503e+06	380242	76963.8	1.283e+06	2.43988e+06	5.92182e+06	423909	7.06586e+06	5.15969e+06	2.11233e+06	4.53237e+06	1.23878e+06	426499	5.31644e+06	4.00211e+06	2.07494e+06	0	1.09347e+06	8.07105e+06	4.05945e+06	3.39268e+06	1.66801e+06	4.77799e+06	5.32277e+06	4.38955e+06	3.49942e+06	9.58938e+06	1.87677e+06	157889
P82979	SAP domain-containing ribonucleoprotein	SARNP	2.95e-06	601751	4.38239e+06	6.53659e+06	0	2.37851e+06	3.07461e+07	5.805e+06	1.07286e+07	5.70551e+06	6.0702e+06	2.04278e+07	6.86487e+06	4.24775e+06	1.84345e+07	5.40969e+06	7.3911e+06	1.19965e+06	2.15838e+07	2.8415e+06	0	4.12451e+07	6.15868e+06	6.71992e+06	5.69773e+06	8.90722e+06	1.36215e+07	3.56813e+06	1.11377e+07	0	8.14048e+06	1.26514e+07	9.5022e+06	2.03964e+06	1.10167e+07	1.06704e+07	5.3041e+06	1.6532e+07	3.73183e+07	2.48314e+07	1.71783e+07	2.43228e+07	4.0563e+07	2.72099e+07	1.45869e+07	1.49882e+07	1.69712e+07
P83876	Thioredoxin-like protein 4A	TXNL4A	0.0220493	0	1.89285e+06	1.04432e+06	756403	0	8.9568e+06	390201	404298	0	1.29113e+06	0	4.28688e+06	875175	1.69389e+06	0	1.11168e+07	1.2418e+06	3.02778e+06	0	278755	925004	947609	1.30744e+06	0	258914	0	0	952978	0	839644	1.63178e+06	2.58021e+06	0	0	0	924547	1.8367e+06	7.9583e+06	0	3.62349e+06	5.83335e+06	2.7984e+06	2.88886e+06	577017	0	1.88443e+06
P84095	Rho-related GTP-binding protein RhoG	RHOG	8.61e-16	1.39954e+07	1.40696e+07	4.8243e+07	1.72126e+07	3.70699e+07	9.06405e+07	1.55018e+07	4.03027e+07	5.89975e+07	2.17302e+07	4.99555e+07	4.19276e+07	5.2649e+07	6.71508e+07	7.17599e+06	1.27697e+08	1.13376e+07	6.37819e+07	3.34184e+07	2.16339e+07	6.33821e+07	3.11714e+07	2.08804e+07	1.26257e+07	5.26953e+07	1.2238e+07	6.60545e+07	4.66145e+07	2.84901e+07	5.78966e+07	5.91207e+07	3.18116e+07	3.58803e+07	2.13853e+07	5.22782e+07	4.52891e+07	3.20895e+07	1.27365e+07	7.54195e+07	1.24139e+07	9.36662e+07	6.74609e+07	8.37521e+07	1.5805e+07	2.92203e+07	2.49897e+07
P85037	Forkhead box protein K1	FOXK1	0.000209662	239328	256906	180514	28655.9	279999	321627	0	98085.8	46905.8	299535	215039	1.33741e+06	0	0	70153.2	0	1.06644e+06	0	0	118285	687506	71403.7	31535.1	0	165702	260009	52088.4	522462	0	0	654110	698059	0	0	36733.9	0	331366	995256	802861	469662	264173	1.45885e+06	82707.6	218632	422138	920457
P98082	Disabled homolog 2	DAB2	7.16e-05	745165	4.6055e+06	725662	1.65634e+06	332633	784360	0	184793	1.29322e+06	3.24915e+06	1.68293e+06	815031	89162	7.71404e+06	210173	1.85549e+06	1.94058e+06	4.91357e+06	2.47153e+06	1.46202e+06	5.49513e+06	2.2474e+06	1.82373e+06	181564	2.02158e+06	520406	985887	3.60713e+06	4.88422e+06	4.48377e+06	5.41063e+06	2.26288e+06	2.27918e+06	2.00861e+06	4.91039e+06	1.71044e+06	0	505012	3.89855e+06	0	843918	979479	2.43237e+06	0	295707	0
P98095	Fibulin-2	FBLN2	7.38e-07	0	2.44016e+06	2.44233e+06	6.46784e+06	1.05679e+06	745255	410565	666237	1.96954e+06	217344	8.01827e+06	675178	1.19209e+06	9.15414e+06	1.09375e+06	4.09477e+06	163554	9.42712e+06	485319	2.29004e+06	0	303948	79407.6	279438	5.91846e+06	1.2352e+06	2.45591e+06	613879	133043	8.63313e+06	6.33482e+06	407665	0	756461	7.51128e+06	324457	0	8.58323e+06	0	415695	450694	0	335902	0	3.52537e+06	0
P98171	Rho GTPase-activating protein 4	ARHGAP4	4.49e-06	87460.2	248432	286779	0	3.43598e+06	158787	0	1.56286e+06	2.4917e+06	61504.4	7.68988e+06	0	0	1.12197e+06	0	251732	177042	0	121892	329780	0	0	178340	0	163943	0	135617	0	0	501452	407299	72518.5	289479	0	140940	559972	0	2.97095e+06	1.14763e+06	0	294572	0	274537	105863	646571	228647
Q00403	Transcription initiation factor IIB	GTF2B	0.00188485	196719	148397	0	0	0	2.72563e+06	134403	683423	421578	0	568903	1.23125e+06	0	1.10215e+06	121401	129656	103757	519306	275391	0	2.4764e+06	1.2463e+06	330359	398847	854935	266691	418545	603144	242243	1.00946e+06	252274	675790	195937	977044	198257	127312	2.85294e+06	1.88008e+06	961195	519046	1.14706e+06	1.43612e+06	1.10521e+06	530589	248563	1.47995e+06
Q00722	1-phosphatidylinositol 4,5-bisphosphate phosphodiesterase beta-2	PLCB2	0.489495	0	649175	66293.5	0	0	0	0	27354.6	0	94630.3	0	0	0	0	0	99988.9	294858	0	83288.3	0	0	37861.9	0	0	33058.7	0	0	0	0	0	38264.6	26731.3	125009	0	90705.5	57709.3	0	0	1.7905e+07	0	0	0	0	0	0	0
Q00796	Sorbitol dehydrogenase	SORD	2.19e-09	6.75895e+08	7.13852e+08	5.7866e+08	8.2301e+08	590390731	4.34748e+08	6.96583e+08	7.09825e+08	4.34866e+08	605717059	5.34779e+08	432749239	5.50941e+08	6.7618e+08	6.77904e+08	3.67464e+08	7.447e+08	3.39814e+08	6.9843e+08	3.17114e+08	6.20437e+08	6.07808e+08	5.86865e+08	6.75595e+08	4.94689e+08	5.61426e+08	4.79633e+08	3.1987e+08	8.92653e+08	4.90855e+08	502685200	3.33418e+08	8.16924e+07	1001376642	4.40332e+08	3.40834e+08	7.26914e+08	644375985	5.22841e+08	3.87552e+08	3.94861e+08	3.70481e+08	2.87195e+08	857749693	3.91141e+08	5.67201e+08
Q00978	Interferon regulatory factor 9	IRF9	0.0490475	0	192804	1.60677e+06	402335	493606	0	2.40298e+06	299179	1.49532e+06	737134	1.08371e+06	0	291664	1.47549e+06	189554	292255	1.47801e+06	343363	400532	0	305518	551047	273891	275067	0	0	561000	0	639626	1.059e+07	0	0	0	606305	694552	0	0	0	1.67841e+06	0	1.13795e+06	0	0	156283	8.97377e+06	673623
Q00G26	Perilipin-5	PLIN5	0.247096	102158	230902	117358	0	358789	1.1841e+06	2.80056e+06	871697	960805	1.19543e+06	1.092e+06	0	1.38516e+06	446387	0	968291	2.79863e+06	0	392082	110190	247516	688340	56630.2	797720	385909	972254	0	0	587843	0	71023.5	5.3194e+06	0	0	213133	0	0	8.5934e+06	41556.2	0	2.98058e+06	1.31058e+06	0	0	181324	1.11421e+06
Q01201	Transcription factor RelB	RELB	0.00496388	0	0	0	0	44145.1	0	0	0	0	0	0	48530.7	0	256265	0	0	271917	0	0	0	139458	0	0	0	126147	207091	0	0	0	53303.2	0	0	29171.1	0	145467	0	0	0	359834	581960	91543.3	0	0	0	0	0
Q01432	AMP deaminase 3	AMPD3	3.86e-11	0	0	0	0	0	438462	0	59991.6	0	0	379883	0	713791	44817.3	0	0	114706	0	0	252806	326580	0	0	0	234498	0	0	0	0	140805	83763.5	0	0	0	316560	0	0	0	100794	0	0	0	343570	0	0	0
Q01469	Fatty acid-binding protein, epidermal	FABP5	1.06e-05	4.71901e+07	3.65275e+07	4.08001e+07	3.3614e+07	2.98748e+07	2.95811e+08	4.0481e+07	6.59829e+07	1.85577e+07	4.42254e+07	6.62944e+07	4.96049e+07	4.66161e+07	2.87433e+07	9.38907e+06	7.60647e+07	4.71971e+07	1.1535e+08	2.45176e+07	2.50448e+07	3.51398e+07	1.39668e+07	2.56135e+07	3.0938e+07	3.74433e+07	6.62511e+07	6.84108e+07	5.0208e+06	1.58249e+07	5.57663e+07	6.40013e+07	4.66988e+07	1.17015e+08	1.87898e+07	5.57342e+07	8.4384e+07	1.51091e+07	6.33e+07	7.06279e+07	5.58907e+07	1.38392e+08	1.27083e+07	2.76766e+07	5.03463e+06	7.96535e+07	1.9614e+07
Q01628	Interferon-induced transmembrane protein 3;Putative dispanin subfamily A member 2d	IFITM3	0.0244126	6.90195e+07	5.34109e+06	4.41347e+07	7.1043e+06	1.60528e+07	9.63255e+06	2.62104e+07	1.29126e+07	2.96343e+07	5.0113e+07	9.21418e+06	3.10434e+07	1.19395e+07	6.41603e+07	3.33849e+06	1.6915e+07	2.40816e+08	2.12943e+06	1.92589e+07	3.26463e+07	3.14135e+07	2.56342e+07	1.95186e+07	1.57195e+07	1.50356e+07	1.34415e+07	3.59546e+07	3.11904e+07	3.35014e+06	1.46101e+07	5.20934e+07	2.21283e+07	4.92368e+07	2.22218e+07	1.00841e+07	6.68083e+07	0	1.22154e+07	5.19763e+07	3.59618e+07	9.19408e+06	9.90508e+06	1.41798e+06	8.60174e+06	1.27946e+08	8.17242e+07
Q01780	Exosome component 10	EXOSC10	0.000467976	78498.1	242449	53739.3	79165.8	233735	406460	423694	81928.1	320454	282574	210005	1.30321e+06	476946	383896	82909.6	568876	741510	400570	136299	448488	293550	291726	472599	0	1.28966e+06	0	0	389605	0	0	773918	92163.9	0	117308	504023	147568	722286	1.12609e+06	732170	837500	858986	240644	102986	433807	4.15618e+06	316054
Q01813	ATP-dependent 6-phosphofructokinase, platelet type	PFKP	1.07e-05	597331	1.54707e+06	4.87841e+06	4.57309e+06	1.91342e+06	494933	244099	100629	2.74818e+06	213928	453589	289197	287740	2.11925e+06	645385	1.06714e+06	1.69538e+06	922460	1.18551e+06	206336	269001	337534	104168	348295	3.75964e+06	434315	1.24076e+06	1.62127e+06	1.1758e+06	8.52735e+06	3.12278e+06	898035	5.81067e+06	2.43035e+06	3.53621e+06	2.30294e+06	67226.6	1.77589e+06	2.26117e+06	293683	0	949683	181745	469973	2.20506e+06	1.03822e+06
Q01814	Plasma membrane calcium-transporting ATPase 2	ATP2B2	0.0223351	295249	657223	0	415640	8.74237e+06	1.70755e+06	2.05357e+06	241891	1.77124e+06	1.14341e+06	184477	5.14442e+06	197642	779003	1.10416e+06	1.37353e+06	1.79298e+06	751284	576439	1.68706e+06	859853	2.04158e+06	1.32115e+06	0	1.25568e+06	6.98282e+06	505399	562738	561774	536402	1.41369e+06	1.03374e+06	5.73089e+06	401702	2.43042e+06	3.15441e+06	2.18931e+06	4.54111e+06	5.71309e+06	3.51369e+06	1.75056e+06	4.92697e+06	487367	1.08613e+06	1.52014e+06	8.29554e+06
Q01831	DNA repair protein complementing XP-C cells	XPC	0.679267	0	244039	64445.4	0	217011	0	62499.9	306547	0	0	52892.5	236168	129925	97767.2	104518	111726	489651	0	0	61603.2	0	479186	223983	126961	0	254683	0	0	261942	61099.8	5.01513e+06	92425.3	0	202773	0	155338	455729	1.28054e+06	517350	373723	377656	672181	0	593839	3.97181e+06	115539
Q01995	Transgelin	TAGLN	1.65e-08	1.91211e+07	260702935	5.73985e+08	4.2461e+08	3.89988e+07	6.53995e+07	6.28482e+07	1.49408e+07	1.20581e+08	5.07312e+07	140394287	1.94174e+07	2.41925e+07	2.68694e+08	2.95525e+07	1.16606e+08	2.18466e+07	165119471	7.21024e+07	3.34633e+07	5.48144e+07	6.30543e+07	1.58189e+07	3.50086e+07	3.62791e+08	124671045	5.16818e+07	7.40618e+07	8.23443e+07	8.83827e+08	3.27386e+08	1.9817e+07	5.7688e+07	1.33544e+08	5.71106e+08	2.05342e+07	2.90488e+06	1.19465e+08	5.725e+06	6.1025e+06	2.193e+07	487519	1.13836e+08	2.05618e+06	3.51828e+07	1.66431e+07
Q02108	Guanylate cyclase soluble subunit alpha-3	GUCY1A3	0.0173337	8.42882e+06	121789	163114	499971	0	57096.6	58790.8	99218.7	71660.4	150746	145643	0	0	1.68109e+06	0	672648	0	232169	0	155049	0	0	0	0	126397	0	0	0	0	153404	535716	0	149400	0	1.25799e+06	0	0	118056	0	0	0	0	0	145483	0	94940.5
Q02252	Methylmalonate-semialdehyde dehydrogenase [acylating], mitochondrial	ALDH6A1	1.74e-10	640607144	1062487841	8.35927e+08	9.01007e+08	8.51334e+08	3.78551e+08	1098360146	495072087	6.22767e+08	1.92154e+08	5.41783e+08	4.59156e+08	7.02798e+08	2.87981e+08	7.0092e+08	8.13107e+08	3.75782e+08	2.78537e+08	4.79239e+08	6.53334e+08	3.81851e+08	6.98729e+08	6.10254e+08	5.51304e+08	6.76935e+08	4.71537e+08	1.5029e+08	6.32469e+08	6.76818e+08	4.2809e+08	5.56655e+08	2.24078e+08	1.98096e+08	8.68212e+08	5.22611e+08	6.61686e+08	1459081896	4.90749e+08	5.89273e+08	8.17893e+08	1118928874	5.28753e+08	4.32087e+08	1309919457	1179964834	1.72914e+08
Q02338	D-beta-hydroxybutyrate dehydrogenase, mitochondrial	BDH1	0.0002426	7.05133e+07	4.12513e+08	7.55675e+07	221478846	3.10246e+08	7.06322e+07	226198079	2.38942e+08	4.852e+08	2.17502e+08	111031605	2.77676e+08	1.48619e+08	9.72305e+07	3.25222e+08	2.829e+08	1.92078e+08	1.93511e+08	4.75557e+08	275734532	2.15027e+08	7.53348e+08	2.57458e+08	7.93918e+07	3.76749e+08	1.91798e+08	179556068	1.4022e+08	9.57919e+07	1.88672e+08	3.25934e+08	1.59133e+08	1.1354e+08	3.08779e+08	2.49995e+08	3.85608e+08	2.06156e+08	1.6911e+08	6.09546e+07	7.45514e+08	1.53391e+08	4.77631e+08	3.91595e+07	1.07299e+08	5.04679e+08	119951775
Q02880	DNA topoisomerase 2-beta	TOP2B	0.373056	20158.2	58122.4	1.24349e+07	357639	87745.1	0	0	49101.8	0	0	355160	1.19329e+06	0	274175	0	0	651740	0	39888.9	631569	0	239069	0	0	71862.2	122377	0	24086.6	30067.6	0	471609	324868	0	0	173682	2.48574e+06	1.09577e+07	189858	412330	23357.6	73699.4	3.32499e+06	116576	816564	987588	23962.8
Q02928	Cytochrome P450 4A11	CYP4A11	3.89e-05	1.17232e+07	4.96046e+07	2.34407e+07	1.21779e+08	4.95298e+07	1.92385e+07	7.51915e+07	6.02902e+07	4.85635e+07	4.28229e+07	2.78874e+06	3.58261e+07	5.76647e+07	6.3253e+06	6.32861e+07	6.6926e+07	6.57633e+07	3.3108e+07	7.16251e+07	2.72492e+06	3.76963e+07	6.19053e+06	2.58871e+07	3.40269e+07	7.1267e+07	1.22553e+07	4.17865e+07	9.68753e+06	4.02293e+07	6.05362e+06	3.87348e+07	1.7919e+07	0	1.43298e+08	3.63243e+07	0	4.38236e+07	2.65068e+07	5.50506e+07	7.90047e+07	2.13857e+07	1.46909e+07	0	6.08814e+06	9.38566e+06	4.39186e+06
Q03154	Aminoacylase-1	ACY1	1.95e-08	3.36588e+08	5.07527e+08	1.99259e+08	3.48017e+08	3.70659e+08	2.55628e+08	7.34279e+08	341445018	3.86663e+08	2.15772e+08	8.71264e+08	1.50976e+08	2.99718e+08	155715253	7.64154e+08	3.42434e+08	6.07427e+08	6.72196e+08	5.18839e+08	4.28142e+07	4.63735e+08	1.92832e+08	2.26432e+08	2.93052e+08	2.27491e+08	2.07106e+08	5.79016e+08	2.35603e+08	4.22652e+08	1.84659e+08	4.05176e+08	2.40762e+08	3.75795e+08	4.83961e+08	2.31123e+08	1.92018e+08	1.88191e+08	5.2223e+08	4.1299e+08	1.16016e+08	1.80561e+08	1.60591e+08	1.52645e+07	3.13374e+08	2.04475e+08	2.44111e+08
Q03252	Lamin-B2	LMNB2	1.15e-07	5.45696e+06	1.52012e+06	3.19679e+06	1.88163e+07	2.02789e+06	2.69497e+06	3.28348e+06	3.08566e+06	2.71661e+06	1.25867e+06	3.80946e+06	7.07831e+06	2.25264e+06	1.00557e+07	818796	2.78986e+06	2.18425e+06	7.55442e+06	1.59952e+06	2.56559e+06	1.61569e+06	1.84238e+06	1.15706e+06	2.53503e+06	9.59344e+06	494699	1.173e+06	7.1526e+06	0	2.13327e+06	9.01731e+06	6.56752e+06	3.42022e+06	3.99245e+06	7.59575e+06	2.59797e+06	2.20183e+06	5.47743e+06	3.02934e+06	2.38512e+06	1.15617e+07	566561	7.99883e+06	1.76313e+06	1.07925e+07	5.49599e+06
Q03426	Mevalonate kinase	MVK	0.000205464	1.27972e+07	6.88432e+06	2.6111e+07	2.31191e+07	3.56458e+06	3.92519e+06	4.45539e+06	1.72251e+07	4.58869e+07	2.63955e+07	9.2247e+06	7.3078e+06	9.82018e+06	1.86993e+07	2.17054e+07	6.27176e+06	2.07845e+07	1.00177e+07	2.36893e+07	6.73916e+06	4.66027e+07	1.22713e+07	1.19651e+07	3.53571e+07	2.02738e+07	7.92126e+06	2.35194e+07	4.74111e+06	2.38362e+07	5.41013e+06	2.58903e+07	1.58285e+07	2.55128e+06	2.6951e+07	1.13797e+07	1.38077e+07	2.60274e+06	2.69493e+07	4.76136e+07	4.58572e+06	1.00035e+06	1.01183e+07	1.40043e+06	2.98787e+07	8.44691e+06	2.18359e+07
Q03518	Antigen peptide transporter 1	TAP1	8.26e-05	1.16808e+06	9.74943e+06	1.06609e+07	4.24518e+06	2.67163e+06	1.47488e+07	4.19659e+06	4.75279e+06	8.78927e+06	1.68619e+07	5.81607e+06	6.93357e+06	4.09255e+06	1.38481e+07	5.15013e+06	4.15674e+06	5.47843e+06	5.49126e+06	9.71362e+06	5.43026e+06	7.78938e+06	3.42324e+06	6.63629e+06	4.66646e+06	6.60698e+06	1.11402e+06	5.83859e+06	4.36929e+06	2.00857e+06	3.97359e+06	6.48892e+06	5.68668e+06	7.57673e+06	3.42475e+06	7.5601e+06	1.51141e+07	3.87642e+06	1.81795e+06	1.06976e+07	4.59067e+06	713664	697332	1.11073e+06	2.22912e+06	1.47151e+07	0
Q03519	Antigen peptide transporter 2	TAP2	0.000102964	1.01536e+06	5.09541e+06	1.11885e+07	3.83345e+06	2.4697e+06	1.19893e+07	2.62665e+06	1.62398e+06	7.84186e+06	1.18948e+07	4.88649e+06	1.55091e+07	767532	1.35449e+07	4.87363e+06	2.18805e+06	3.0686e+06	4.72976e+06	1.01036e+07	2.24019e+06	8.41011e+06	4.1566e+06	3.51464e+06	1.48485e+06	2.41332e+06	0	2.73103e+06	1.76859e+06	0	4.32781e+06	4.62871e+06	5.56371e+06	4.11083e+06	2.11544e+06	5.9015e+06	9.66867e+06	370708	636408	8.02446e+06	1.90314e+06	422364	1.74194e+06	2.0206e+06	185136	1.16981e+07	600482
Q04695	Keratin, type I cytoskeletal 17	KRT17	0.086042	934801	635672	4.25388e+06	8.90317e+06	52420.5	7.8847e+06	87694.1	2.14683e+06	1.06792e+06	1.67597e+06	555457	1.08252e+06	260779	0	1.12843e+06	9.89296e+06	1.83488e+06	4.18643e+06	1.70761e+06	6.90041e+06	54061.4	0	5.2033e+06	631281	2.45378e+06	590899	0	1.39391e+06	2.25561e+06	6.77728e+06	448133	2.33126e+06	1.12675e+06	713930	6.5203e+06	633667	282413	681417	40548.9	1.29261e+06	3.7759e+06	6.1149e+06	3.89877e+06	0	0	3.09661e+06
Q04724	Transducin-like enhancer protein 1;Transducin-like enhancer protein 4	TLE1;TLE4	1.96e-05	0	0	0	78897.7	0	99234.3	0	56903.3	118417	442911	0	181090	391711	588752	0	82575.3	246458	0	76600.6	100896	0	141678	0	234375	736600	805763	0	0	0	0	524238	0	0	310395	386894	97476.1	0	2.39211e+06	280587	938349	660061	471443	186902	270049	1.40216e+06	993992
Q04864	Proto-oncogene c-Rel	REL	3.74e-06	145537	195761	0	0	330095	0	78845.9	0	0	317659	360692	0	0	166329	0	287363	163261	108332	0	0	151674	0	282831	0	0	94233	0	0	0	0	259756	189029	191711	100081	308482	190416	180862	58427.5	988104	120069	487155	178724	0	117163	128575	441495
Q05655	Protein kinase C delta type;Protein kinase C delta type regulatory subunit;Protein kinase C delta type catalytic subunit	PRKCD	0.000923538	556294	445154	302399	540633	92894	0	273415	324546	609085	42371.7	1.8514e+06	733902	288167	880884	119532	375290	738532	540655	106003	1.12073e+06	53781.3	912032	158708	113151	346007	301629	407125	317406	0	878796	1.32381e+06	155194	363374	374933	838261	1.29073e+06	89450.7	142866	788580	513045	191583	1.17734e+06	0	900829	689065	2.22517e+06
Q05707	Collagen alpha-1(XIV) chain	COL14A1	1.94e-08	72170.8	2.4886e+07	5.28234e+07	7.05211e+07	4.59332e+06	2.159e+06	6.60107e+06	5.80331e+06	3.19266e+07	1.05387e+06	5.20916e+07	2.07778e+06	6.44662e+06	8.74621e+07	1.57584e+06	5.66357e+07	1.04897e+07	3.89355e+07	2.45592e+07	4.64502e+06	5.11551e+06	9.23206e+06	4.92829e+06	1.28511e+06	5.58345e+07	2.86781e+06	1.23781e+07	1.64019e+07	2.49425e+06	9.95839e+07	4.87183e+07	508646	2.38728e+06	3.11172e+07	1.12797e+08	1.23561e+06	144257	9.81746e+06	1.06901e+06	95996.8	1.53493e+06	0	1.06168e+06	107182	5.00356e+06	52305.9
Q06187	Tyrosine-protein kinase BTK	BTK	4.85e-07	0	79509.9	0	0	0	0	0	0	302278	0	0	0	0	0	0	0	0	0	0	0	237063	0	0	0	0	0	0	0	0	0	0	0	0	0	60965.7	0	0	0	0	0	0	0	0	0	0	0
Q06278	Aldehyde oxidase	AOX1	0.000819175	3.15495e+08	8.11858e+07	267897222	2.38618e+08	1.10078e+08	150104983	2.34604e+07	2.77422e+08	3.13917e+07	277502331	4.41507e+07	1.85909e+08	2.06229e+08	2.48846e+08	108233180	1.80509e+08	5.04986e+07	6.39246e+07	2.61223e+08	8.71367e+07	1.33407e+08	3.3708e+06	1.95483e+08	322815933	2.3426e+08	7.00067e+06	6.22734e+07	2.15884e+07	2.63716e+08	1.11349e+08	8.36916e+07	1.53817e+08	2.91952e+07	3.55246e+08	1.38029e+08	1.79566e+08	5.65332e+07	0	1.7258e+08	114823	1.65188e+06	3.59366e+07	4.78367e+08	5.07314e+08	1.45268e+07	1.4824e+08
Q06330	Recombining binding protein suppressor of hairless	RBPJ	3.61e-05	0	0	0	0	0	176976	0	0	0	0	550301	0	0	0	0	0	0	182361	0	0	0	0	0	0	288505	147712	0	133375	0	0	205113	520570	0	0	0	0	399000	0	182148	0	607699	262297	0	222256	0	0
Q06481	Amyloid-like protein 2	APLP2	0.00024511	0	250424	65309.6	0	0	379602	0	79837.5	75042.9	672938	472783	308314	0	91698.5	33149.9	119712	157780	196777	73183	291363	0	175020	1.11216e+06	0	325412	93741.4	356185	1.35721e+06	0	332864	1.57032e+06	563581	1.92037e+06	0	131854	2.19327e+06	152952	893934	1.89184e+06	60217.8	329532	672963	203327	768095	475446	535381
Q06520	Bile salt sulfotransferase	SULT2A1	4.88e-06	2413139324	9.90575e+08	1231536258	5.20452e+08	357524704	5.69044e+08	4.35121e+08	6.33302e+08	1672867354	6.28009e+08	7.00702e+08	4.72052e+08	1282490265	4.44995e+08	2129654195	3.87884e+08	6.36389e+08	5.42186e+08	1580674063	357392929	1139647943	8.37428e+08	6.2744e+08	1504562820	1027975291	4.58618e+08	3.53022e+08	2.79582e+08	1283671414	4.11578e+08	6.21284e+08	6.73047e+08	955743	1142883346	4.89579e+08	7.10486e+08	1.08971e+08	796641493	2.73631e+08	7.30989e+08	6.01808e+08	1954837044	5.1718e+08	2656892067	1368609175	7.27324e+08
Q06828	Fibromodulin	FMOD	4.68e-05	0	0	1.34727e+07	8.79668e+06	0	0	0	0	0	0	3.65021e+06	0	0	3.98776e+06	0	1.51917e+06	0	1.07876e+06	200406	0	431030	1.04139e+06	0	0	8.97104e+06	0	0	2.23265e+06	0	2.27515e+07	6.23672e+06	0	365732	0	3.78805e+06	0	0	0	0	0	0	0	0	0	0	0
Q07866	Kinesin light chain 1	KLC1	2.27e-18	1.37114e+06	2.18952e+06	3.50855e+06	1.06472e+06	600954	702569	408307	740013	1.21768e+06	1.42594e+06	3.42394e+06	855432	1.06684e+06	2.47605e+06	439262	986363	1.05718e+06	443145	680889	1.02479e+06	1.31143e+06	430721	252859	363695	2.22237e+06	710809	1.04955e+06	2.23019e+06	318602	5.90851e+06	2.96058e+06	2.78623e+06	1.59644e+06	342634	5.50864e+06	3.24377e+06	340494	1.37133e+06	2.92423e+06	734277	2.58766e+06	706385	1.14229e+06	754373	1.01691e+06	4.23581e+06
Q07889	Son of sevenless homolog 1	SOS1	7.51e-05	28332	0	0	0	0	0	36205.1	28965.8	0	34061.5	71225.6	0	0	85234.5	0	0	0	6210.07	17541.4	44155.9	0	145995	142972	0	132627	0	0	0	0	0	0	17785.5	0	42880.7	65559.2	23295.4	178152	75307.4	162029	65638.7	157656	488140	0	118888	120360	238372
Q08380	Galectin-3-binding protein	LGALS3BP	3.53e-05	4.8955e+07	1.78772e+07	4.71301e+07	2.88758e+07	3.17425e+07	3.16545e+06	9.72513e+06	4.49581e+06	1.6798e+07	8.2811e+07	4.65955e+07	4.5573e+07	1.68571e+07	4.26089e+07	4.14655e+06	6.53008e+06	1.27754e+07	6.10178e+06	2.65471e+07	4.94986e+07	3.01422e+07	1.4331e+07	3.25196e+07	6.85363e+06	6.93892e+06	4.76511e+06	1.05197e+07	8.86469e+06	8.77749e+06	2.29353e+07	1.37005e+07	2.02567e+07	8.44833e+06	1.83003e+07	204523774	6.14594e+06	5.70337e+06	4.26511e+07	2.40559e+07	1.50701e+06	1.32807e+06	2.09792e+06	1.38868e+07	1.44775e+06	2.10786e+07	3.2115e+07
Q08426	Peroxisomal bifunctional enzyme;Enoyl-CoA hydratase/3,2-trans-enoyl-CoA isomerase;3-hydroxyacyl-CoA dehydrogenase	EHHADH	5.68e-08	4.05939e+08	7.06058e+08	2.58142e+08	3.56503e+08	4.08938e+08	7.3377e+08	3.32456e+08	8.00076e+08	7.07666e+08	3.72361e+08	2.6416e+08	9.6216e+08	5.64314e+08	1.59184e+08	5.95987e+08	4.07184e+08	413465308	4.56631e+08	4.9782e+08	1904372128	4.71041e+07	6.85166e+08	8.25078e+08	4.90801e+08	8.12448e+08	2.59482e+08	2.94462e+08	5.26583e+08	5.66535e+08	3.95721e+08	6.11161e+08	4.25033e+08	6.95746e+07	3.61849e+08	3.23695e+08	3.14008e+08	5.16084e+08	4.46381e+08	6.51351e+07	4.27434e+08	349656720	1.88295e+08	1.50663e+08	7.81436e+08	3.28004e+08	1.17473e+08
Q08431	Lactadherin;Lactadherin short form;Medin	MFGE8	0.000103613	0	0	1.4326e+06	1.70234e+06	0	0	0	0	0	0	96807	0	0	1.00545e+06	0	0	0	0	0	0	0	65188.3	0	0	2.70824e+06	0	0	0	0	519024	3.09089e+06	0	0	0	109695	38120.9	0	0	0	0	0	0	0	0	0	0
Q08477	Docosahexaenoic acid omega-hydroxylase CYP4F3	CYP4F3	4.73e-06	2.6603e+06	5.15559e+06	3.5489e+06	4.54415e+06	3.28814e+06	1.32871e+06	5.44972e+06	5.32516e+06	2.99811e+06	1.63126e+06	2.08761e+06	1.2145e+07	1.89526e+07	5.38674e+06	5.05684e+06	6.64853e+06	3.50889e+06	9.45953e+06	4.16748e+06	808080	1.44845e+06	3.69456e+06	5.31699e+06	3.03017e+06	4.58399e+06	2.63033e+06	4.86799e+06	9.27907e+06	4.05538e+06	1.3869e+06	2.10853e+06	655907	0	7.34834e+06	4.68274e+06	1.86844e+06	2.32946e+06	1.41958e+06	1.11814e+06	1.21363e+06	2.38193e+06	1.15144e+06	997515	2.03975e+06	1.33504e+06	2.45227e+06
Q08722	Leukocyte surface antigen CD47	CD47	6.11e-07	9.48853e+06	4.44791e+06	1.1246e+07	1.50756e+07	1.01724e+07	1.22897e+07	8.68322e+06	3.6848e+06	9.5592e+06	8.4126e+06	2.27571e+06	1.08905e+07	4.03236e+06	1.58742e+07	0	9.67014e+06	6.46985e+06	6.65216e+06	6.42647e+06	1.73399e+07	1.26369e+07	9.616e+06	7.05042e+06	1.11488e+07	1.42245e+07	2.16178e+06	5.92287e+06	3.50888e+06	3.12664e+06	5.66879e+06	1.54692e+07	1.72798e+06	1.6086e+07	1.68097e+07	1.09915e+07	5.99378e+06	3.58693e+06	6.97764e+06	1.99566e+07	3.78193e+06	8.79445e+06	9.46484e+06	2.32829e+07	2.88759e+06	8.23115e+06	9.35106e+06
Q08AF3	Schlafen family member 5	SLFN5	0.00026534	0	642689	6.36321e+06	242611	0	55530.6	303395	173265	169200	1.47602e+06	781795	239537	0	1.39106e+06	172408	0	311641	223777	293984	84182.1	224367	0	70004.8	94712	769732	655178	188182	242067	0	1.89206e+06	1.43096e+06	425757	0	378729	1.48024e+06	393099	0	68509.7	1.11698e+06	0	0	0	350562	0	2.3687e+06	124076
Q08AH3	Acyl-coenzyme A synthetase ACSM2A, mitochondrial	ACSM2A	8.71e-05	7.069e+07	1.21903e+08	5.91836e+07	8.68959e+07	1.58586e+08	3.47621e+07	1.37626e+07	1.06957e+08	9.12577e+07	1.01075e+06	4.33114e+06	4.44907e+07	1.06099e+08	1.26123e+07	4.32571e+07	2.54916e+07	7.53693e+07	4.0118e+07	1.29041e+08	1.64e+08	9.33367e+07	5.58556e+07	2.23823e+07	9.29618e+07	4.18899e+07	6.63991e+07	4.80358e+07	1.02134e+08	7.94481e+06	1.21943e+08	5.20334e+08	6.38079e+07	7.29223e+07	1.11964e+08	4.64695e+07	1.93621e+07	1.26294e+08	2.82494e+07	149693	6.22759e+07	5.27969e+07	1.35431e+07	6.85118e+06	7.18421e+07	1.80194e+07	3.73291e+06
Q09161	Nuclear cap-binding protein subunit 1	NCBP1	0.113158	668418	1.79051e+06	992505	1.57451e+06	2.40831e+06	2.59102e+06	2.13075e+06	1.94549e+06	4.32371e+06	2.52622e+06	1.45355e+06	3.85349e+06	2.02273e+06	4.44801e+06	609736	3.797e+06	1.71144e+06	2.86942e+06	1.47162e+06	1.01093e+06	820490	1.70902e+06	4.54149e+06	480019	2.51198e+06	2.13701e+06	1.99455e+06	2.38556e+06	333967	3.08736e+06	3.4066e+06	3.17812e+06	528470	341574	1.21268e+06	4.00583e+06	3.34825e+06	1.57408e+07	2.82991e+06	4.64774e+06	6.62991e+06	8.80909e+06	2.03745e+06	2.07045e+06	9.17739e+06	2.26346e+06
Q09472	Histone acetyltransferase p300	EP300	0.0101866	0	0	0	0	0	0	37062.6	0	0	0	35685.4	51294.8	0	564633	0	553924	11959.1	0	0	0	44142.1	0	0	0	16962	31904.9	0	0	0	0	0	49516.4	0	0	0	0	18078.4	0	60761.8	14456.8	184126	49652.4	31935.4	0	71426.7	391505
Q0VD83	Apolipoprotein B receptor	APOBR	0.0273865	50982.8	217105	327839	217826	34883.3	146622	49599.8	0	68367	104749	0	70714.5	0	604212	0	1.14661e+07	0	0	189582	806146	0	19521.3	44061.8	0	53073.6	88848.8	0	83000.7	40703.7	206125	789376	96926.7	717636	257770	397039	150330	0	0	99000.3	146102	0	69191.9	0	0	4.6229e+06	0
Q10588	ADP-ribosyl cyclase/cyclic ADP-ribose hydrolase 2	BST1	5.09e-07	0	647571	1.51136e+06	1.03148e+07	206624	0	0	0	552075	0	411451	0	281870	2.22594e+06	0	326365	641432	0	0	1.03378e+06	843097	0	0	648822	2.54953e+06	0	0	198329	0	2.2911e+06	1.95567e+06	0	611329	1.61893e+06	1.48761e+06	444407	0	0	258651	0	727496	2.28105e+06	172762	0	0	1.9254e+06
Q10589	Bone marrow stromal antigen 2	BST2	0.0797842	1.26237e+07	1.30292e+07	2.46542e+07	1.69957e+07	1.66668e+07	1.92495e+06	1.93549e+07	1.07428e+07	1.68732e+07	1.45158e+07	1.24283e+07	9.19962e+06	0	1.8563e+07	2.63921e+06	8.70751e+06	1.75203e+07	3.55669e+06	1.21622e+07	4.85629e+06	4.25846e+06	6.48316e+06	8.23323e+06	8.94756e+06	8.62735e+06	7.16807e+06	3.92029e+06	6.68042e+06	1.17949e+07	2.11685e+07	1.96564e+07	2.89645e+06	1.75295e+07	1.41117e+07	9.34613e+06	1.05397e+07	7.97318e+06	1.43147e+07	1.08288e+06	2.01082e+06	0	7.75695e+07	0	1.59607e+07	1.89125e+07	0
Q12765	Secernin-1	SCRN1	4.89e-07	607636	866681	5.36581e+06	2.97802e+06	464036	938416	1.0281e+06	309025	354520	1.85549e+06	3.37445e+06	0	0	4.8439e+06	0	1.9414e+06	330445	1.85087e+06	1.54488e+06	1.51111e+06	887268	781784	417988	0	3.71132e+06	553253	817970	290818	159327	9.81663e+06	3.75282e+06	220034	241096	2.93799e+06	3.64186e+06	1.06157e+07	0	2.8877e+06	1.62282e+06	426161	0	0	537512	0	2.81944e+06	9.20278e+06
Q12770	Sterol regulatory element-binding protein cleavage-activating protein	SCAP	0.000551005	0	18301	0	13962.6	107567	140793	101049	225066	111675	39617.4	210822	125313	94172.1	134163	0	0	170560	0	226480	0	160195	0	132861	56868.7	53805.8	136604	332778	0	0	0	24790.1	197208	0	136247	187443	286338	126401	64799	312489	145237	0	241360	0	394316	0	380473
Q12789	General transcription factor 3C polypeptide 1	GTF3C1	4.38e-05	0	0	0	0	0	9554.25	20524.8	0	60902.3	0	127334	0	36461.4	94927.3	20654.9	0	0	0	0	39702.6	0	0	113104	0	0	0	0	131043	0	0	77741.7	46577.3	0	0	123684	243701	220096	338691	21564.8	182251	267000	0	0	103317	264154	12314.5
Q12800	Alpha-globin transcription factor CP2	TFCP2	0.414561	1.22881e+06	1.06486e+06	1.24626e+06	0	0	0	0	1.05476e+06	0	517287	0	441207	0	795591	0	286011	1.14711e+06	0	0	343472	0	4.30518e+07	453723	0	1.15754e+06	1.51418e+06	1.19807e+06	403813	0	544011	1.51645e+06	765404	0	0	825514	1.93613e+06	791445	2.2373e+06	1.73083e+06	0	0	1.41354e+06	379055	198274	0	1.45676e+06
Q12805	EGF-containing fibulin-like extracellular matrix protein 1	EFEMP1	2.86e-06	312020	1.44474e+07	3.00494e+07	2.6859e+07	5.35591e+06	635361	7.6164e+06	1.99908e+06	9.49532e+06	3.6066e+06	3.43099e+07	0	4.23217e+06	4.65258e+07	3.29959e+06	1.72739e+07	1.49332e+06	1.51039e+07	4.3565e+06	2.37252e+06	230135	5.78703e+06	180325	2.19433e+06	7.21087e+07	5.34888e+06	9.44978e+06	8.11421e+06	3.78062e+06	8.21422e+07	3.10787e+07	2.05149e+06	5.41172e+06	5.29646e+06	4.69784e+07	1.17021e+06	488165	1.18689e+07	1.25626e+06	866966	485717	0	0	0	3.78399e+06	142311
Q12824	SWI/SNF-related matrix-associated actin-dependent regulator of chromatin subfamily B member 1	SMARCB1	5.01e-07	0	0	255562	309669	199582	294464	657304	322974	1.19744e+06	160723	2.94125e+06	1.22103e+06	1.31443e+06	1.02334e+06	0	0	413131	252559	250390	389594	421680	2.33271e+06	672609	0	1.69827e+06	1.85823e+06	540129	0	0	145476	928860	0	373860	135682	1.585e+06	166427	2.67241e+06	4.8486e+06	4.46776e+06	3.80785e+06	1.50254e+06	1.61708e+06	0	757242	3.49942e+06	1.75371e+06
Q12857	Nuclear factor 1 A-type	NFIA	0.000133939	2.30469e+06	1.50661e+06	1.73465e+06	590197	3.37592e+06	2.11669e+06	7.60684e+06	388460	1.67185e+06	325433	965886	2.34067e+06	2.08324e+06	1.65993e+06	879824	723890	3.7022e+06	1.48728e+06	1.15011e+06	260334	3.44018e+06	2.83149e+06	1.38663e+06	3.37274e+06	434627	954697	1.40507e+06	860670	963334	1.58563e+06	609932	1.09439e+06	0	3.38083e+06	201668	182805	6.53745e+06	4.51564e+06	1.30188e+06	1.91323e+06	7.90606e+06	5.14275e+06	1.36e+06	2.05158e+06	865107	397915
Q12884	Prolyl endopeptidase FAP;Antiplasmin-cleaving enzyme FAP, soluble form	FAP	0.000390044	0	0	0	0	0	0	331068	0	0	0	236176	0	0	2.25636e+06	0	0	0	110532	0	0	0	0	0	0	917996	0	0	0	0	0	761241	0	0	0	1.11215e+06	0	0	0	0	0	0	0	0	0	0	0
Q12888	Tumor suppressor p53-binding protein 1	TP53BP1	2.58e-05	76203.9	539095	0	13474.8	0	147898	204208	16607.8	129587	60007.9	784445	852426	575455	313662	0	77113.5	334236	216160	39010.9	548539	59106.7	40410.4	515584	146862	268125	0	96425.8	24419.4	0	0	462105	97168.3	47228.6	169479	40734	80510.2	438600	468243	455922	173034	1.29164e+06	618491	464995	14561	557440	193464
Q12913	Receptor-type tyrosine-protein phosphatase eta	PTPRJ	0.000487323	0	470773	77518	122334	32782.1	506777	0	64349.3	168412	245478	732887	326520	894608	98256.4	1.90048e+06	0	165174	55187.6	208584	305840	0	77580.6	0	0	669869	115048	59774.9	108211	490447	69499.2	49244.7	802010	224173	846247	78059.6	402672	0	86814.5	229760	466139	78907.7	970783	0	129678	0	1.50902e+06
Q12965	Unconventional myosin-Ie	MYO1E	1.33e-06	0	3.18999e+06	815357	588503	1.80419e+06	1.11383e+06	1.52649e+06	929510	2.10453e+06	4.09004e+06	2.00836e+06	2.02031e+06	1.03263e+06	2.98425e+06	2.78844e+06	2.71338e+06	1.03985e+07	1.28692e+06	509966	2.04317e+06	1.0143e+06	3.58228e+06	1.1237e+06	50180.5	2.07395e+06	1.04066e+06	4.17613e+06	1.54354e+06	246499	2.81616e+06	5.34576e+06	6.43338e+06	2.19778e+06	791707	3.90006e+06	4.51207e+06	748174	1.24774e+07	1.1715e+06	2.79536e+06	2.26891e+06	2.94282e+06	312949	0	1.99892e+06	1.06697e+06
Q12979	Active breakpoint cluster region-related protein	ABR	0.000389565	0	0	0	0	0	0	0	0	0	0	0	0	0	0	0	0	0	23690.9	35709.5	0	0	0	0	0	0	0	0	0	0	89756.6	0	0	144297	0	112454	0	678445	0	0	0	0	0	0	0	4.02127e+06	0
Q12996	Cleavage stimulation factor subunit 3	CSTF3	0.451381	1.33797e+06	439182	1.0333e+06	349686	69208.4	225443	63293.8	1.39357e+07	351381	1.55102e+06	1.35131e+06	1.22975e+07	482339	4.73447e+06	93632.7	294088	639982	452744	737930	614502	2.17237e+06	732915	2.76503e+06	3.17485e+07	555384	1.15166e+07	4.04375e+07	1.36113e+07	361575	1.09367e+06	2.18652e+07	1.7925e+06	51560.8	861298	1.5005e+06	604733	2.8138e+06	1.40646e+07	3.24244e+06	1.21991e+06	1.77336e+06	2.01841e+06	1.26675e+06	637450	2.05312e+06	4.36214e+06
Q13042	Cell division cycle protein 16 homolog	CDC16	0.000819235	0	809849	224717	224970	153047	1.5475e+06	106374	571229	250840	1.10702e+06	1.40764e+06	695885	246211	774479	221834	0	540317	184070	143783	498144	0	119495	1.53665e+06	556067	1.02067e+06	1.08482e+06	243901	281350	204282	209874	882936	0	0	0	164672	125643	73319.4	1.6014e+06	1.03597e+06	740420	175998	2.24918e+06	256544	1.39443e+06	1.43057e+06	583512
Q13043	Serine/threonine-protein kinase 4;Serine/threonine-protein kinase 4 37kDa subunit;Serine/threonine-protein kinase 4 18kDa subunit	STK4	1.78e-11	204123	505038	1.65989e+06	716379	0	318716	284670	732710	262460	0	571063	104551	1.58926e+06	1.57235e+06	0	192404	510417	899413	533845	290508	295856	0	193717	967471	1.22133e+06	362553	780752	89051.1	348800	385012	1.79674e+06	535487	1.12521e+06	289432	928258	199886	996591	180562	1.57559e+06	666026	850068	385603	0	0	1.00468e+06	280171
Q13057	Bifunctional coenzyme A synthase;Phosphopantetheine adenylyltransferase;Dephospho-CoA kinase	COASY	1.74e-05	2.67781e+07	6.45404e+07	5.27199e+07	2.61666e+07	2.31352e+07	1.49133e+07	2.54078e+07	6.52104e+07	4.06953e+07	2.31607e+07	5.03257e+07	3.19811e+07	5.84284e+07	2.04202e+07	3.25346e+07	2.10111e+07	2.69875e+07	1.82548e+07	3.45837e+07	7.04106e+07	2.1446e+07	4.01877e+07	7.00245e+07	3.09956e+07	4.50523e+07	3.17402e+07	3.22784e+07	2.02521e+07	8.30159e+07	1.52605e+07	7.93122e+07	2.40627e+07	1.75823e+07	4.23152e+07	2.54769e+07	3.35697e+07	4.54385e+07	1.58858e+07	1.93797e+07	4.65979e+07	1.13575e+07	3.23412e+07	9.70134e+06	6.07016e+07	5.93159e+07	3.03468e+07
Q13094	Lymphocyte cytosolic protein 2	LCP2	6.92e-08	0	544243	333164	85376.6	0	529910	0	340266	0	195133	0	0	138354	997612	422815	0	743450	1.06141e+06	526431	119447	0	0	0	0	937023	0	0	0	0	879930	1.22446e+06	882568	0	275040	1.07612e+06	1.76496e+06	65204.2	221784	406687	0	0	0	0	0	1.18994e+06	0
Q13188	Serine/threonine-protein kinase 3;Serine/threonine-protein kinase 3 36kDa subunit;Serine/threonine-protein kinase 3 20kDa subunit	STK3	2.79e-06	672140	443958	207567	610576	255089	3.60088e+06	788363	939398	0	1.30964e+06	736878	211336	394977	2.16478e+06	181263	1.20937e+06	650269	1.10676e+06	459190	952664	239920	0	981748	276995	1.20713e+06	1.58037e+06	207372	395960	0	0	1.04726e+06	694613	2.7993e+06	179683	1.40736e+06	1.04834e+06	298976	953985	1.95895e+06	2.06477e+06	1.46334e+06	3.20971e+06	3.14862e+06	1.15935e+06	394223	1.13366e+06
Q13228	Selenium-binding protein 1	SELENBP1	6.65e-07	5.86918e+08	3.46044e+08	3.25989e+08	405102423	2.97756e+08	4.03795e+08	6.43146e+08	403839776	7.15603e+08	1.07976e+08	2.36187e+08	2.62211e+08	3.72024e+08	4.81403e+08	2.11113e+08	2.93018e+08	6.66719e+08	2.36976e+08	6.41862e+08	2.42996e+08	1.72179e+08	9.14904e+08	1.19296e+08	7.76906e+08	3.09812e+08	649049131	3.2298e+08	5.86755e+07	4.35655e+08	1.52553e+08	2.07784e+08	1.62411e+08	519781946	4.1661e+08	2.31991e+08	1.29026e+08	3.60379e+08	3.87186e+08	2.82373e+08	2.92914e+08	3.0599e+08	232145469	1.05722e+08	8.12997e+08	5.73311e+08	308038183
Q13242	Serine/arginine-rich splicing factor 9	SRSF9	4.6e-06	0	1.68574e+06	548024	0	200655	3.24471e+06	239605	0	0	3.13367e+06	5.5463e+06	1.68445e+06	788722	814184	1.51901e+06	1.92301e+06	5.97993e+06	0	1.96898e+06	3.5605e+06	7.29789e+06	0	677625	0	419398	0	413437	3.71329e+06	0	5.3254e+06	4.95015e+06	3.60155e+06	0	0	1.27361e+06	1.4876e+06	3.68373e+06	6.46047e+06	6.57212e+06	2.39004e+06	9.83309e+06	2.03734e+06	8.37819e+06	890397	5.66517e+06	417476
Q13303	Voltage-gated potassium channel subunit beta-2	KCNAB2	4.61e-06	0	0	1.82659e+06	0	262353	389148	0	216121	1.07695e+06	0	0	0	729507	0	0	365602	0	226784	1.01952e+06	0	0	0	473195	0	451343	164511	892679	0	0	301174	3.68806e+06	0	714575	0	0	0	0	0	180637	562842	0	742999	0	0	406804	0
Q13308	Inactive tyrosine-protein kinase 7	PTK7	0.000153871	0	55993.2	0	141641	50000.9	0	0	0	85773.6	0	137449	0	0	490713	0	66749.4	0	0	0	0	0	0	0	0	932600	159580	0	0	0	619673	356855	0	0	0	634568	0	0	502002	0	594758	75445	0	0	0	0	1.32984e+06
Q13330	Metastasis-associated protein MTA1	MTA1	0.000198038	77312.9	136609	121492	68283.7	1.27869e+06	0	79832.6	82215.2	288842	65522.2	82425.5	54921.7	185343	262181	87296.3	0	0	151453	0	67242.9	0	65980.9	259838	0	0	0	110518	0	85181.9	84363.6	269415	0	54998.3	150230	172117	231099	828610	278055	376505	287461	569921	414251	69799.3	317096	386415	1.04513e+06
Q13356	Peptidyl-prolyl cis-trans isomerase-like 2	PPIL2	7.62e-05	0	265695	0	0	0	111565	0	0	0	0	749606	312592	0	161893	84810.4	0	336240	685979	71796.2	50013.3	0	0	0	0	0	207434	0	373744	0	0	0	301951	0	0	381156	0	953402	86546	580950	228678	304420	0	95487.7	324004	200045	1.72898e+06
Q13423	NAD(P) transhydrogenase, mitochondrial	NNT	2.81e-05	2.32684e+07	4.90024e+07	9.08394e+07	8.79692e+07	2.47459e+08	5.90696e+07	1.07918e+08	8.42765e+07	9.72774e+07	8.06953e+07	6.22156e+07	1.25184e+08	1.13205e+08	5.49904e+07	6.79331e+07	1.92637e+08	2.11354e+08	1.12128e+08	7.07708e+07	2.62384e+08	1.89751e+08	6.27813e+07	1.26417e+08	1.70545e+08	1.70052e+08	1.52977e+08	1.8066e+08	1.36668e+08	1.09188e+08	6.47924e+07	1.52844e+08	1.16992e+08	4.6947e+07	1.86662e+08	4.77065e+07	1.59198e+08	4.4759e+07	1.08332e+08	4.31954e+07	2.05893e+08	9.6595e+07	3.76053e+07	8.19286e+07	1.14068e+08	1.39093e+08	1.38356e+07
Q13459	Unconventional myosin-IXb	MYO9B	1.73e-07	0	60642.4	71815.6	15415.4	83020.3	143919	542664	0	202860	63117.9	80988.6	228098	893410	84709.3	0	83988.7	244874	56794	488740	80846.2	0	119199	516239	0	187496	379763	157732	0	0	245312	210724	38627.9	165369	0	161380	378202	13043.4	218685	27285.6	49312.7	45101.9	0	0	56904.1	149270	41238.4
Q13469	Nuclear factor of activated T-cells, cytoplasmic 2	NFATC2	0.000901985	0	75913.5	0	0	0	0	0	0	90755.7	0	259969	0	0	0	0	209257	0	208578	0	0	0	91439.6	0	0	52847.2	97726.2	0	0	0	0	148303	89121.7	0	0	120504	180131	0	289317	45913.2	64842.6	0	0	0	0	103762	434386
Q13488	V-type proton ATPase 116 kDa subunit a isoform 3	TCIRG1	0.000364041	0	1.02649e+06	296863	0	898355	0	849215	37268.7	741459	0	4.11482e+06	0	0	0	154948	162234	1.15632e+06	165062	1.20526e+06	1.38387e+06	0	0	403154	934710	664200	0	448283	0	0	331334	1.26325e+06	0	0	0	702297	1.46997e+06	0	0	0	316611	0	895046	48212.8	938559	49734.8	0
Q13509	Tubulin beta-3 chain	TUBB3	7.66e-09	0	1.04946e+06	1.58749e+06	3.8489e+06	521995	0	689832	923644	0	584646	4.17753e+06	1.24796e+06	475937	3.99612e+06	309788	436160	0	790083	0	0	1.78391e+06	689193	661578	0	4.06087e+06	485062	2.62348e+06	1.71861e+06	345909	2.92969e+06	4.32007e+06	163662	1978259	2.57707e+06	9.50512e+06	104031	0	2.56023e+06	981740	331612	813261	0	444729	0	1.23059e+06	607130
Q13573	SNW domain-containing protein 1	SNW1	2.08e-06	602587	1.14394e+06	1.11618e+06	0	2.02541e+06	1.16888e+06	649790	708581	1.0511e+06	1.10967e+06	2.28406e+06	985715	1.94637e+06	2.55841e+06	1.63158e+06	1.71981e+06	691440	1.37369e+06	138929	0	2.31953e+06	359801	1.27511e+06	713496	1.84462e+06	927101	709970	1.27232e+06	158264	811907	1.52538e+06	1.07561e+06	124037	505146	1.10827e+06	241283	1.90297e+06	5.89889e+06	1.98457e+06	3.90745e+06	6.5284e+06	1.7891e+06	1.0172e+06	1.25477e+06	3.80095e+06	3.1857e+06
Q13608	Peroxisome assembly factor 2	PEX6	0.000108179	611359	4.55755e+06	1.68592e+06	451009	2.18231e+06	2.84036e+06	979201	2.78271e+06	691608	1.77385e+06	5.14882e+06	1.49645e+06	4.2396e+06	1.52823e+06	2.20698e+06	492557	2.09005e+06	1.63104e+06	589528	6.18602e+06	250960	246079	1.51834e+06	1.48109e+06	1.79832e+06	1.69363e+06	4.34583e+06	1.83986e+06	2.23217e+06	1.3227e+06	1.44388e+06	2.55927e+06	419094	186353	1.14329e+06	945598	1.19727e+06	1.11646e+06	1.11101e+06	361310	868585	710523	1.47618e+06	1.51987e+06	1.39442e+06	1.74881e+06
Q13627	Dual specificity tyrosine-phosphorylation-regulated kinase 1A	DYRK1A	0.685088	55368.8	0	0	0	215031	0	204208	0	126193	0	1.13384e+06	85060.2	345664	0	0	0	320349	0	0	0	0	0	1.40011e+06	83323.2	1.63604e+07	0	153841	90611.9	0	0	0	0	0	0	478137	170662	137602	161805	102918	176775	316739	0	54875.4	0	453014	301734
Q13636	Ras-related protein Rab-31	RAB31	4.15e-09	0	0	316767	0	0	0	0	0	0	0	0	0	0	710447	0	0	248053	0	0	208108	0	0	0	0	0	0	0	252350	0	1.21487e+06	0	265667	186519	0	412658	0	0	0	0	0	0	0	0	0	0	0
Q13643	Four and a half LIM domains protein 3	FHL3	4.51e-05	0	2.72685e+06	1.42292e+06	0	0	0	0	292584	180238	1.48315e+06	3.08586e+06	0	0	1.32005e+06	0	171689	0	3.0592e+06	1.39306e+06	217858	540017	0	0	0	5.96656e+06	0	1.12183e+06	532744	0	2.18238e+06	4.52101e+06	2.28543e+06	547464	0	1.90032e+06	0	0	170200	542194	0	1.63706e+06	393499	564504	0	2.29523e+06	698057
Q13769	THO complex subunit 5 homolog	THOC5	0.818932	135343	0	0	0	3.98595e+06	158200	2.4753e+06	0	3.88276e+06	0	456334	0	1.48652e+06	178137	1.44952e+06	754106	0	2.82775e+06	0	243901	218187	0	1.02493e+06	786917	221573	0	754011	150513	0	0	7.02791e+07	0	0	0	76595.6	291598	983311	1.84722e+06	1.82691e+06	1.52949e+06	5.23069e+06	290458	1.97975e+06	246854	906542	75260.1
Q13823	Nucleolar GTP-binding protein 2	GNL2	0.00241326	0	0	0	0	0	259380	0	51565.2	0	0	0	0	0	0	0	0	110235	57062.6	0	108196	400689	0	0	0	0	0	0	0	0	107386	133987	160307	0	0	0	0	0	557109	70704.7	255234	405083	0	108493	415293	241167	0
Q13825	Methylglutaconyl-CoA hydratase, mitochondrial	AUH	0.000377979	3.65582e+06	8.18614e+06	8.64776e+06	1.05847e+07	5.60042e+06	7.33239e+06	5.14747e+06	2.20408e+07	2.57719e+06	1.25499e+07	4.07414e+06	1.44669e+07	1.13518e+07	6.74083e+06	8.20266e+06	9.19054e+06	1.02951e+07	1.53627e+07	5.72575e+06	2.47234e+06	6.511e+06	5.21435e+06	3.44477e+07	1.09009e+07	5.43413e+06	1.8834e+07	3.86753e+06	1.09844e+07	5.15196e+06	6.25838e+06	1.12921e+07	1.48791e+07	1.42702e+07	6.91408e+06	4.84887e+06	1.72941e+07	1.10948e+07	6.14999e+06	4.53906e+06	4.61146e+06	1.19085e+07	1.16638e+07	9.87997e+06	1.23909e+07	6.24162e+06	5.20848e+06
Q13888	General transcription factor IIH subunit 2	GTF2H2	0.00251489	0	80198.1	133833	0	0	644622	0	0	0	60745.5	743934	267429	131062	249286	67039.8	159985	206517	217239	0	116849	56292.8	205874	724545	0	146846	0	0	183730	264402	157370	545882	83902.8	0	109829	0	603943	420634	1.99208e+06	1.81119e+06	630730	408181	477536	330695	390241	374217	257353
Q13951	Core-binding factor subunit beta	CBFB	2.72e-07	0	0	2.03773e+06	2.03498e+06	376052	373915	434002	0	946918	280891	1.36124e+06	1.61886e+06	458080	3.55549e+06	1.75863e+06	0	1.39106e+06	0	1.18396e+06	578495	0	618395	358211	525320	273215	0	663739	983275	486040	1.87895e+06	2.30082e+06	968495	3.58378e+06	865610	804415	0	630318	158103	1.43366e+06	1.31259e+06	0	3.69435e+06	612169	0	585453	1.54998e+06
Q14005	Pro-interleukin-16;Interleukin-16	IL16	0.000467665	308321	2.31484e+06	1.58969e+06	1.95768e+06	113368	321147	279724	1.30836e+07	1.4182e+06	1.95781e+06	1.25537e+06	5.07824e+06	125383	1.54065e+06	0	4.54369e+06	2.07832e+06	333271	1.07012e+06	5.14005e+06	193609	51250.6	142136	44532.2	6.24843e+06	59716.9	263157	542721	171804	653398	651873	1.18215e+06	532861	1.18487e+06	2.22757e+06	1.99178e+06	299448	1.86389e+06	1.16899e+06	40622.6	0	94727.6	64999.4	0	655942	92938.6
Q14019	Coactosin-like protein	COTL1	1.62e-12	1.23776e+07	7.18958e+07	4.58624e+07	6.72891e+07	1.77228e+07	2.31072e+07	2.95537e+07	3.25788e+07	6.3917e+07	3.45072e+07	5.73216e+07	1.6901e+07	1.40355e+07	6.36371e+07	8.86568e+06	2.38141e+07	4.98126e+07	4.78616e+07	4.97987e+07	5.51227e+07	1.03011e+07	1.291e+07	1.71423e+07	6.6828e+06	3.9046e+07	1.81323e+07	3.16091e+07	1.59009e+07	1.86391e+07	7.00797e+07	7.48556e+07	1.7816e+07	4.37253e+07	4.62875e+07	6.37051e+07	3.78593e+07	1.29369e+06	2.42891e+07	5.21565e+07	1.26257e+07	844977	0	2.88395e+07	3.15766e+06	6.6887e+07	7.98474e+06
Q14032	Bile acid-CoA:amino acid N-acyltransferase	BAAT	1.08e-07	4.72802e+08	1398886490	2.94204e+08	3.87245e+08	7.09114e+08	2.28388e+08	4.21065e+08	1161787596	1094646519	1071956309	7.34411e+08	4.35529e+08	1130122382	1.78653e+08	1262272930	4.3142e+08	350819457	4.38676e+08	5.23048e+08	3.47152e+08	5.54557e+08	3.06954e+08	1375074138	4.54584e+08	4.4144e+08	1308087935	399069990	9.52702e+08	3.96138e+08	7.24933e+08	7.08794e+08	6.86415e+08	337257913	4.44497e+08	1.93698e+08	1.8501e+08	1224899686	4.11592e+08	4.04707e+07	2281157449	544964324	2.42563e+08	3.25379e+07	2.97605e+08	6.63593e+08	327216287
Q14116	Interleukin-18	IL18	1.06e-06	0	2.36178e+06	1.53931e+06	944836	450775	906400	809588	1.71467e+06	3.23619e+06	1.26914e+06	1.1245e+07	0	0	0	573455	1.56381e+06	2.18652e+06	0	3.90099e+06	1.6262e+06	3.0965e+06	0	0	0	1.96786e+06	0	4.44751e+06	425706	0	2.69761e+06	2.66535e+06	0	8.29841e+06	3.70558e+06	3.30972e+06	0	0	0	1.14879e+06	0	0	366842	0	0	3.27995e+06	0
Q14117	Dihydropyrimidinase	DPYS	2.09e-07	123980536	2.25961e+08	1.57334e+08	1.85237e+08	1.00039e+08	1.02832e+08	1.33876e+08	1.9887e+08	3.18835e+08	1.42183e+08	1.58705e+08	7.248e+07	1.17651e+08	9.74487e+07	3.06345e+08	2.87184e+08	1.75902e+08	2.17108e+08	3.78374e+08	2.55236e+08	1.05381e+08	263427810	2.46715e+08	1.22861e+08	8.95355e+07	3.55253e+08	2.80292e+08	9.66852e+07	2.31e+08	1.79015e+08	2.14822e+08	8.82634e+07	3.28051e+07	3.13834e+08	7.85287e+07	4.39822e+08	1.66085e+08	210951581	1.21807e+08	167075110	3.11835e+08	1.32923e+08	8.92173e+07	1.14535e+08	2.21538e+08	1.72377e+08
Q14137	Ribosome biogenesis protein BOP1	BOP1	0.00330277	0	0	197440	0	91782	742576	220202	78224.1	233000	77521.4	938016	220938	469469	0	186473	0	0	0	0	224294	204528	24972.7	2.26557e+06	0	1.40672e+06	499448	848666	434430	167810	0	1896765	206098	199601	57662	0	0	1.18626e+06	1.4582e+06	4.82695e+06	820264	1.1735e+06	120608	76446.9	215961	2.02405e+06	1.12835e+06
Q14139	Ubiquitin conjugation factor E4 A	UBE4A	1.46e-05	2.41316e+06	1.08527e+06	1.79265e+06	2.21387e+06	2.94151e+06	4.92528e+06	6.07685e+06	1.53328e+06	1.19891e+06	689409	2.26423e+06	5.28867e+06	5.63264e+06	1.11831e+06	966619	2.44375e+06	2.79539e+06	1.96265e+06	1.88008e+06	2.2712e+06	4.94728e+06	4.39951e+06	3.8997e+06	896735	2.67997e+06	2.74879e+06	714331	6.75073e+06	1.29363e+06	183937	2.7675e+06	2.38472e+06	282144	1.26387e+06	1.69932e+06	9.90321e+06	2.49458e+06	4.72932e+06	4.96886e+06	4.42176e+06	1.81469e+06	2.06306e+06	2.91506e+06	5.60646e+06	2.48936e+06	2.49403e+06
Q14185	Dedicator of cytokinesis protein 1	DOCK1	4.19e-05	199192	115215	50803.8	83595.7	60307.7	88334.7	374769	125314	0	361929	125584	576930	132187	621528	44246.7	62214.2	0	185475	75467.4	7305.99	37244.2	62992.8	0	0	121984	238435	0	82423.4	0	296814	293721	313371	0	170798	344102	124796	0	210466	53884.6	140228	0	713759	87901.9	0	110301	585016
Q14192	Four and a half LIM domains protein 2	FHL2	0.000204204	0	2.37866e+06	8.52596e+06	6.69193e+06	1.3388e+06	1.04228e+06	1.43719e+06	168468	1.13584e+07	1.45382e+06	3.09055e+06	0	159763	1.07586e+07	0	6.52207e+06	8.0352e+06	8.04345e+06	2.54978e+06	173988	0	893764	0	427170	8.50565e+06	2.18461e+06	1.1912e+06	836079	4.80036e+06	2.21274e+07	7.12434e+06	0	3.33031e+06	6.53838e+06	7.90516e+06	125363	0	736765	72110.2	0	802115	0	968343	0	507457	0
Q14195	Dihydropyrimidinase-related protein 3	DPYSL3	1.41e-11	757476	7.46834e+06	4.47368e+07	3.13164e+07	2.35541e+06	3.57935e+06	2.953e+06	3.24906e+06	6.57413e+06	3.26015e+06	2.67902e+07	0	459905	4.47096e+07	165002	8.96561e+06	1.68013e+06	9.26701e+06	5.50733e+06	354771	2.96809e+06	9.45814e+06	1.42722e+06	436418	5.41074e+07	5.00819e+06	3.39205e+06	3.2625e+06	2.28891e+06	7.0246e+07	3.34554e+07	225282	3.87872e+06	9.65872e+06	7.52531e+07	462946	2.21897e+06	8.46384e+06	2.39531e+06	542295	674651	786159	399469	1.31105e+06	7.58296e+06	909887
Q14244	Ensconsin	MAP7	0.00147341	3.26852e+06	2.43137e+06	727523	0	675931	0	9.42474e+06	0	3.29212e+06	0	14638.8	843983	2.97007e+06	0	3.21269e+06	0	308863	4.64783e+06	430970	0	804840	691920	4.95137e+06	262900	0	2.37227e+06	2.2452e+06	278261	5.25268e+06	1.71425e+06	919707	1.56853e+06	333751	1.77549e+06	0	1.68592e+06	6.24301e+06	1.59462e+06	1.03703e+06	5.77755e+06	150013	1.16228e+06	608498	232039	890022	5.10333e+06
Q14314	Fibroleukin	FGL2	1.65e-07	0	391432	377065	1.14701e+06	39437.7	293584	307180	0	259547	298600	0	74530.7	0	223766	0	909456	96048.3	0	542091	306347	0	0	25182.3	0	0	0	48484.7	0	0	0	448133	0	55632.1	535417	633816	286787	0	141791	73258.7	328886	0	0	0	0	197985	0
Q14320	Protein FAM50A	FAM50A	0.00132819	400951	2.01495e+06	2.38114e+06	0	287197	1.83557e+06	0	288861	384407	0	7.48841e+06	418858	235907	1.39731e+06	307582	654434	0	3.1436e+06	0	475415	1.98576e+06	1.77954e+06	0	0	2.62979e+06	241486	0	549236	0	623757	898147	289736	5.31205e+06	0	199736	0	5.21878e+06	642198	0	1.48997e+07	1.83065e+07	6.22399e+06	3.13828e+06	509413	2.98203e+06	0
Q14353	Guanidinoacetate N-methyltransferase	GAMT	0.00152863	3.03062e+08	1.60923e+08	1.32548e+08	1.61928e+08	3.89133e+08	1.87587e+08	2.86955e+08	2.49037e+08	2.25999e+08	1.89572e+08	4.56773e+08	1.34147e+08	1.6353e+08	1.16558e+08	1.9663e+08	5.2361e+08	287560430	2.09912e+08	3.68961e+08	9.29319e+07	2.45912e+08	5.37044e+08	9.24042e+07	2.14752e+08	467053350	1.65975e+08	3.92379e+08	7.13267e+07	3.15824e+08	1.09891e+08	2.27359e+08	2.20538e+08	1.30463e+08	3.0088e+08	1.87533e+08	181906762	1.18952e+08	2.07336e+08	1.90896e+08	3.83144e+08	2.83617e+08	2.29515e+08	6.60646e+07	2.50011e+08	3.66448e+08	2.6113e+08
Q14397	Glucokinase regulatory protein	GCKR	0.0183178	5.08534e+06	2.22586e+06	1.73836e+06	4.02592e+06	5.62633e+06	0	1.18926e+06	8.42978e+06	5.33907e+07	0	1.16407e+06	40190.8	175926	90456.8	9.89632e+06	1.16352e+06	3.51291e+06	3.548e+07	1.08559e+06	4.58292e+06	2.53342e+07	723369	102566	2.89423e+06	0	575326	1.10466e+07	263412	3.6731e+06	3.56301e+06	2.87335e+06	1.75105e+06	4.32269e+06	4.51356e+06	0	0	74637.7	186965	5.24681e+06	144963	0	0	0	2.28578e+06	0	0
Q14520	Hyaluronan-binding protein 2;Hyaluronan-binding protein 2 50 kDa heavy chain;Hyaluronan-binding protein 2 50 kDa heavy chain alternate form;Hyaluronan-binding protein 2 27 kDa light chain;Hyaluronan-binding protein 2 27 kDa light chain alternate form	HABP2	2.61e-10	1.16212e+06	7.60193e+06	3.69189e+06	2.47109e+06	4.28388e+06	7.2863e+06	1.10618e+06	2.38143e+06	7.87077e+06	1.13872e+07	3.96095e+06	4.62047e+06	2.15814e+06	3.30604e+06	1.03503e+06	2.84943e+06	9.43079e+06	3.12571e+06	580573	9.43851e+06	5.58866e+06	2.78839e+06	1.25618e+06	3.15292e+06	2.58033e+06	4.63928e+06	2.09778e+06	6.08785e+06	770463	4.05391e+06	1.90286e+06	1.06138e+07	1.20003e+06	2.37293e+06	5.39693e+06	2.90907e+06	8.35268e+06	7.48855e+06	6.78005e+06	8.68531e+06	9.8565e+06	2.80135e+06	6.4735e+06	4.4448e+06	1.05767e+06	1.59612e+07
Q14527	Helicase-like transcription factor	HLTF	0.00153711	25551.5	0	0	0	71872.6	0	0	0	80166.8	0	483266	72245.8	55526.6	0	147507	0	0	0	0	85027.8	0	1.26302e+06	451944	0	348731	114501	0	0	70530.4	0	31942.5	157652	0	0	0	292047	811513	281609	233240	2.63506e+06	1.41419e+06	0	121854	0	294947	233897
Q14562	ATP-dependent RNA helicase DHX8	DHX8	0.000390603	66341	0	0	0	0	81955.6	74278	0	0	0	105154	170592	0	64237.7	0	89701.3	0	52050.4	0	0	0	0	187333	0	188140	50830.1	0	0	0	0	0	64046.1	0	0	0	80023.4	423592	150969	117445	227200	685341	324897	35653.6	0	586087	0
Q14566	DNA replication licensing factor MCM6	MCM6	8.51e-05	370535	755128	0	0	3.11618e+06	323562	2.1364e+06	0	1.3303e+06	51762.3	4.23558e+06	7.68869e+06	140256	248157	135004	67234.7	542430	800945	181790	72946.8	361888	4.47278e+06	1.18381e+06	0	1.63235e+06	9.37904e+06	477628	1.20033e+06	0	0	3.85971e+06	3.51931e+06	0	124707	183468	1.32428e+06	9.97772e+06	3.35449e+07	5.61636e+06	2.3436e+07	1.43458e+07	1.87091e+07	647665	5.52305e+06	3.96267e+06	4.9772e+06
Q14643	Inositol 1,4,5-trisphosphate receptor type 1	ITPR1	0.00541357	0	0	164392	141024	0	63226.3	1.70822e+06	0	0	402037	79688.3	0	0	115664	0	0	0	44382.5	0	147444	0	107311	0	0	23028.7	0	37293	0	0	0	157676	0	0	35872.4	296903	193927	225902	152075	100209	46737	0	0	0	151487	12079.8	0
Q14671	Pumilio homolog 1	PUM1	0.316828	0	188065	0	0	0	8.94576e+06	135887	496347	0	138215	476984	0	0	217498	170175	163796	360500	319722	0	421440	0	0	611416	130718	1.23989e+06	0	0	172052	0	65601.5	267660	0	0	196231	163877	0	496175	15825	207327	119289	1.51028e+06	764181	495166	516527	163938	285845
Q14676	Mediator of DNA damage checkpoint protein 1	MDC1	0.00333019	0	0	0	0	129734	0	0	0	0	0	0	67288.5	0	63505.3	0	0	0	0	0	24196	0	0	51018.8	0	154821	0	0	0	0	0	0	0	0	0	0	0	82099.9	83315.4	187118	565593	383085	138270	0	193833	85835.7	0
Q14683	Structural maintenance of chromosomes protein 1A	SMC1A	1.71e-06	1.12814e+06	2.70147e+06	843762	2.50676e+06	6.90719e+06	1.73707e+06	3.81026e+06	1.55722e+06	3.10565e+06	875540	3.18224e+06	2.06419e+06	4.97174e+06	1.33194e+06	314583	758954	3.98791e+06	3.00042e+06	390885	1.9738e+06	2.23475e+06	387288	2.75599e+06	1.09628e+06	2.99013e+06	3.69312e+06	809037	1.80939e+06	243192	1.00297e+06	2.02784e+06	2.36601e+06	203319	3.40885e+06	2.30685e+06	2.2428e+06	2.69348e+06	8.37693e+06	1.53249e+07	1.29179e+07	1.23676e+07	6.10821e+06	2.84719e+06	2.51258e+06	4.55793e+06	3.95903e+06
Q14684	Ribosomal RNA processing protein 1 homolog B	RRP1B	4.59e-05	0	0	0	0	176612	0	81845.6	0	0	332317	267632	329414	400973	196980	136316	0	134603	75172.1	0	97608.9	108922	41570.5	51416.7	99199.3	124618	89349.7	133479	0	110034	159957	532059	275961	0	353528	54620.9	154732	0	395040	818933	308252	137635	513284	0	388576	408314	0
Q14749	Glycine N-methyltransferase	GNMT	0.000769493	3.5048e+06	4.84642e+07	1.04809e+08	173852921	3.35008e+08	8.8643e+07	3.63282e+08	8.76426e+07	2.44821e+06	3.2731e+06	5.81103e+07	2.32948e+07	3.28077e+07	2.09549e+08	1.47469e+08	4.47306e+07	4.37314e+07	1.46843e+07	6.91189e+07	3.71842e+07	9.83726e+07	9.22346e+07	9.04713e+07	6.18615e+07	3.02627e+08	1.48128e+08	1.38146e+07	8.8415e+06	327563892	9.51996e+06	6.26384e+07	6.87655e+06	7.32955e+06	3.07275e+08	8.56212e+07	289007	759661	1.11079e+08	1.81032e+07	9.84863e+07	6.19573e+07	2.97751e+06	1.25873e+06	4.80694e+06	1.81305e+08	9.23209e+07
Q14761	Protein tyrosine phosphatase receptor type C-associated protein	PTPRCAP	1.65e-05	0	2.21136e+06	5.11175e+06	0	0	0	0	0	3.2325e+06	443469	0	0	0	2.33475e+06	0	0	1.55745e+06	950895	3.70259e+06	0	0	0	0	0	0	0	1.45236e+06	0	0	0	582988	829284	0	0	0	2.47377e+06	0	0	0	0	0	0	0	0	0	0
Q14766	Latent-transforming growth factor beta-binding protein 1	LTBP1	0.001103	0	138730	624401	1.16388e+06	226913	0	0	24963.1	453398	0	177327	0	101302	300885	0	186520	0	528806	183655	0	106870	0	0	0	1.38654e+06	19024	167755	0	0	2.17685e+06	513603	0	0	44547.5	392826	0	0	167568	23746.9	17832.2	0	0	0	0	0	0
Q14767	Latent-transforming growth factor beta-binding protein 2	LTBP2	0.000136974	0	752337	1.99717e+06	643859	54831.1	0	0	278613	124210	0	2.09834e+06	0	70645.4	6.49668e+06	0	1.67159e+06	0	1.88127e+06	0	41423	0	88749	26798.5	0	8.51583e+06	0	0	110189	0	4.17995e+06	4.94055e+06	0	53302	0	3.19061e+06	0	74903.6	280473	0	0	0	0	0	0	200686	2.701e+06
Q14894	Ketimine reductase mu-crystallin	CRYM	0.000340016	1.29489e+07	8.36893e+06	1.19799e+07	1.40599e+07	6.02007e+07	4.03813e+07	2.27143e+07	1.12909e+07	1.168e+07	2.17784e+06	1.94554e+07	9.37007e+06	5.65886e+07	1.27714e+06	9.63783e+06	8.79626e+07	8.12976e+07	2.23551e+07	1.3909e+07	1.07534e+08	1.16151e+07	1.54844e+07	5.28286e+07	3.88975e+07	1.30923e+07	2.8132e+07	1.35318e+07	1.99789e+07	4.92818e+07	6.7126e+06	5.00685e+06	2.70072e+06	2.83714e+07	2.72082e+07	3.05453e+06	1.18748e+06	2.96625e+07	4.91101e+07	991477	4.19509e+07	6.08743e+07	0	1.84792e+06	0	402912	0
Q14914	Prostaglandin reductase 1	PTGR1	1.3e-06	4.41632e+08	4.50708e+08	6.54617e+08	3.20254e+08	4.54645e+08	3.36107e+08	1.62813e+08	2.68884e+08	1.78461e+08	5.45205e+08	3.62798e+08	1129334663	239961215	1.25168e+08	382190637	1.91206e+08	4.77271e+08	2.98372e+08	6.84294e+08	7.95682e+08	450356537	3.36892e+08	7.56758e+08	6.9019e+08	6.89093e+08	2.51822e+08	4.22064e+08	8.34578e+08	4.32342e+08	4.98234e+07	1180971442	4.62445e+08	2.66372e+08	5.8318e+08	6.32897e+07	4.99114e+08	1.5924e+08	2.33091e+08	4.05932e+07	1.54976e+08	1.26549e+08	303231148	1.56913e+08	3.38169e+08	1.71862e+08	1.25861e+08
Q14919	Dr1-associated corepressor	DRAP1	8.42e-05	2.37224e+06	0	911025	0	885527	0	1.35509e+06	0	0	0	8.32513e+06	0	0	783730	636221	0	0	0	0	0	672825	1.18895e+06	4.38424e+06	0	418887	916018	944640	427736	464392	0	0	1.77653e+06	1.54321e+06	1.74045e+06	0	0	4.05437e+06	411054	7.72647e+06	4.12471e+06	1.26103e+07	2.19564e+06	3.90282e+06	780687	474888	508904
Q14997	Proteasome activator complex subunit 4	PSME4	0.0139749	0	511233	118199	80703.1	25892.8	449695	32383.9	269368	77377.9	958516	457457	960943	0	304367	206909	500380	0	280312	127067	707165	726154	329918	414618	0	372764	368316	321599	485724	0	26389.2	599459	187033	102575	0	255026	545599	621423	525259	759169	100505	68141.3	718001	246108	468140	455828	117436
Q14CX7	N-alpha-acetyltransferase 25, NatB auxiliary subunit	NAA25	2.59e-05	49876.6	353657	359173	33797	252474	49621.1	80323.1	141857	205946	1.1588e+06	442614	480148	451319	371023	430968	0	459034	0	93664.9	681898	155299	95563.9	643859	252756	167522	375553	456808	106552	0	76127.6	462650	1.08439e+06	160916	184916	225992	803425	851598	644327	651342	417879	84271.6	1.78331e+06	179984	272320	1.2068e+06	971102
Q15027	Arf-GAP with coiled-coil, ANK repeat and PH domain-containing protein 1	ACAP1	5.04e-06	0	67326.6	0	0	0	0	0	373142	0	0	0	0	0	0	0	0	83958.7	0	0	0	534901	0	0	0	36961.7	0	0	0	0	0	119992	0	798209	0	0	0	0	13396.3	619090	0	0	0	0	0	0	0
Q15043	Zinc transporter ZIP14	SLC39A14	0.0205627	3.90164e+07	9.66084e+07	3.86556e+07	1.73496e+07	39937674	1.29814e+07	3.92909e+07	2.10877e+07	5.09339e+07	1.04557e+08	1.23217e+07	1.45089e+07	1.53508e+07	2.93452e+07	1.13684e+07	2.8698e+07	6.80791e+07	2.21223e+07	5.06699e+07	1.20498e+07	2.70196e+07	5.48303e+07	3.5228e+07	4.15902e+07	2.31276e+07	6.40101e+07	5.98993e+07	4.68103e+07	2.95622e+07	3.77462e+07	1.82902e+07	9.55342e+07	8.8729e+07	4.61959e+07	1.46599e+07	1.1323e+08	4.66933e+07	1.74262e+07	1.43903e+07	49188384	2.67654e+07	6.97172e+06	4.22546e+07	6.57637e+06	3.69389e+07	2.37608e+07
Q15052	Rho guanine nucleotide exchange factor 6	ARHGEF6	3.84e-07	267388	1.83445e+06	787854	738108	797399	898925	737695	771620	1.03148e+06	789629	545884	575376	382578	1.1208e+06	495596	410373	923266	0	693131	1.8016e+06	0	940293	468381	114076	358764	1.20554e+06	653713	341034	494455	1.07596e+06	1.19023e+06	910916	358912	952683	1.84118e+06	1.10282e+06	203626	1.11161e+06	847620	758905	54865	777089	313415	533248	1.52168e+06	422715
Q15063	Periostin	POSTN	1.66e-07	2.76886e+06	911429	2.9749e+07	2.78516e+06	0	479066	1.34236e+06	1.19879e+06	0	0	1.43875e+07	720317	146596	6.90538e+06	0	1.61713e+06	1.1638e+06	1.86178e+06	140951	1.335e+07	234613	4.88333e+06	261498	0	4.63584e+07	0	1.56918e+06	1.40926e+06	0	260109	1.61521e+08	0	445158	634755	2.4795e+07	394865	0	1.3048e+06	377539	0	0	0	0	0	569895	0
Q15080	Neutrophil cytosol factor 4	NCF4	3.32e-06	183728	2.58476e+06	697959	1.45886e+06	97580	0	0	0	463871	1.30648e+06	335594	93641.7	0	2.21098e+06	0	0	887992	0	440874	4.07532e+06	0	0	0	0	0	1.79708e+06	132322	0	0	788815	250864	570023	870561	0	1.7034e+06	588223	0	0	4.71729e+06	76884.7	0	0	0	0	241842	0
Q15102	Platelet-activating factor acetylhydrolase IB subunit gamma	PAFAH1B3	0.00116553	2.20193e+07	4.02245e+06	1.88585e+06	4.38161e+06	3.9661e+06	0	2.18579e+06	1.50181e+06	2.4452e+06	2.81171e+07	2.14703e+07	3.47769e+07	6.39837e+06	4.23251e+06	3.52506e+06	4.67695e+06	2.02881e+06	2.44133e+06	2.30868e+06	1.44165e+06	5.14802e+06	3.56468e+06	1.33912e+07	556859	6.18017e+06	2.65246e+07	3.37687e+06	4.31281e+06	969129	9.63119e+07	1.2789e+07	9.0905e+06	2.88849e+06	6.98312e+06	1.54992e+07	8.37198e+06	1.19102e+07	2.46829e+07	9.95515e+07	1.5897e+07	1.09358e+07	2.46259e+07	1.10841e+07	1.55568e+07	6.64612e+06	5.16894e+07
Q15113	Procollagen C-endopeptidase enhancer 1	PCOLCE	3.88e-07	0	182573	2.3745e+06	3.06855e+06	1.01504e+06	78838.5	800556	0	675125	508892	449119	0	224489	5.76437e+06	0	800332	123724	505503	136935	0	543070	1.03859e+06	0	0	2.53961e+07	671135	128102	598380	318062	4.88886e+06	5.62823e+06	1.42253e+06	262542	0	9.46776e+06	211864	0	131852	4.41739e+06	79784	0	0	210017	0	0	0
Q15119	[Pyruvate dehydrogenase (acetyl-transferring)] kinase isozyme 2, mitochondrial	PDK2	0.00044445	1.51207e+06	2.98881e+06	2.18637e+06	2.61219e+06	930184	0	962070	1.79583e+06	1.40656e+06	1.18302e+06	1.96864e+06	2.94121e+06	1.10329e+06	745087	2.94786e+06	180570	709858	3.9969e+06	798091	6.28614e+06	907258	2.14138e+06	3.92625e+06	854735	7.84832e+06	1.21142e+06	695922	2.40699e+06	1.15825e+06	3.05565e+06	830327	979908	1.22495e+06	2.85621e+06	808156	3.42636e+06	596640	1.24139e+06	1.11214e+06	3.3909e+06	3.1637e+06	5.13127e+06	1.48913e+06	2.63381e+06	2.54789e+06	651613
Q15166	Serum paraoxonase/lactonase 3	PON3	4.73e-05	1.22945e+08	1.27213e+08	9.23825e+07	1.87993e+08	3.5134e+08	5.34657e+07	2.79903e+08	1.05775e+08	3.6793e+07	1.18781e+07	9.54963e+07	1.9138e+07	2.66022e+08	1.22218e+08	6.52322e+07	9.22332e+07	2.45956e+08	6.07324e+07	1.11095e+08	6.20851e+07	5.93213e+07	7.60076e+07	6.40132e+07	1.81792e+08	9.69662e+07	112108773	6.01317e+07	6.71664e+07	8.49982e+07	4.68942e+07	4.72856e+07	1.09348e+08	9.3906e+06	2.36091e+08	8.17671e+07	121098397	4.82021e+07	3.49574e+07	8.32617e+07	4.14148e+07	3.16341e+07	1.26379e+08	6.62159e+07	4.33498e+07	4.76315e+07	2.92602e+07
Q15274	Nicotinate-nucleotide pyrophosphorylase [carboxylating]	QPRT	0.0358518	5.41842e+08	2.42252e+08	9.7743e+07	1.44898e+08	4.89487e+07	5.22553e+07	2.41451e+07	1.89554e+08	1.11008e+08	8.50696e+07	1.70185e+08	1.69931e+08	2.50775e+08	7.89789e+07	2.69426e+08	1.24474e+08	8.01851e+07	1.78788e+08	1.56671e+08	1.26896e+08	111381247	1.39124e+08	1.512e+08	1.15747e+08	1.14774e+08	7.59665e+07	113234831	1.3784e+08	1.34559e+08	6.0448e+07	1.26524e+08	1.29178e+08	2.48017e+07	1.5029e+08	9.36248e+07	6.04981e+07	4.55273e+07	4.62118e+07	1.5427e+08	1.10538e+08	2.0308e+07	6.17946e+07	1.05238e+07	6.14649e+08	1.12296e+07	9.74799e+07
Q15291	Retinoblastoma-binding protein 5	RBBP5	1.62e-06	304244	325351	798687	501325	1.72942e+06	1.44014e+06	765054	1.02346e+06	1.50736e+06	242255	1.65746e+06	1.08389e+06	1.59128e+06	1.25604e+06	217300	1.00645e+06	825558	348229	539792	572133	0	1.40074e+06	940112	684384	2.82683e+06	374566	281543	682316	0	177444	1.26855e+06	804994	233016	647025	679334	361121	812432	2.44612e+06	3.27895e+06	4.46975e+06	2.16012e+06	1.27644e+06	1.05793e+06	1.88946e+06	2.62241e+06	875417
Q15334	Lethal(2) giant larvae protein homolog 1	LLGL1	0.00432412	0	0	0	0	0	0	0	85720	48036.2	0	68224.8	0	0	0	0	0	0	0	103295	0	721407	0	0	0	109964	0	0	0	0	0	42691.5	0	0	0	0	0	0	88976.2	0	53996.4	60392.7	718877	0	0	61529.1	121161
Q15397	Pumilio domain-containing protein KIAA0020	KIAA0020	0.102337	0	0	76506.9	0	0	0	76437	0	117573	62868.8	0	460807	0	0	0	0	604617	0	0	802000	133524	0	107889	0	1.78425e+06	0	107462	40613	0	7.8346e+06	1.99913e+06	418848	0	0	0	139893	0	274073	885723	0	0	0	0	158797	552243	0
Q15427	Splicing factor 3B subunit 4	SF3B4	5.08e-08	4.3847e+06	3.76417e+06	2.90735e+06	1.19404e+06	2.0205e+06	4.18553e+06	1.93802e+06	2.81998e+06	2.20101e+06	2.95456e+06	4.28115e+06	2.05489e+06	142932	4.88312e+06	1.19747e+06	3.7188e+06	4.35393e+06	2.05154e+06	0	3.61258e+06	7.11853e+06	1.54385e+06	1.18131e+06	1.20849e+06	3.92133e+06	2.69043e+06	78806.4	1.244e+06	0	4.65213e+06	3.50528e+06	1.51536e+06	1.3463e+06	1.64216e+06	3.37302e+06	1.26568e+06	4.90148e+06	1.52114e+07	8.68318e+06	5.29447e+06	1.3006e+07	8.65938e+06	1.10781e+06	5.00486e+06	1.71786e+07	5.2622e+06
Q15493	Regucalcin	RGN	0.100229	6.10747e+07	6.41095e+07	5.5586e+07	138603709	6.67702e+07	1.61105e+07	6.57189e+07	1.00274e+08	3.6545e+07	2.66984e+07	1.35805e+07	1.26347e+07	5.96894e+07	2.21478e+07	7.45458e+07	2.65373e+08	1.45719e+08	6.89625e+07	8.07842e+07	883864	101740264	5.14143e+07	1.60116e+07	1.04908e+08	3.30994e+07	9.7442e+07	5.87717e+07	3.93384e+07	7.86181e+07	4.66955e+07	4.68509e+07	2.92669e+07	7.44943e+06	1.18439e+08	8.27051e+07	9.15589e+07	1.39424e+07	7.19316e+07	2.29132e+07	1.95675e+07	6.52412e+07	5.02232e+07	6.52912e+07	123843422	7.66218e+07	7.7234e+07
Q15599	Na(+)/H(+) exchange regulatory cofactor NHE-RF2	SLC9A3R2	0.0527778	2.19339e+06	2.12627e+06	2.83515e+07	9.53743e+06	8.73159e+06	5.5977e+06	1.21386e+07	9.6444e+06	6.24166e+06	4.46209e+06	1.81762e+06	3.70672e+06	1.84722e+07	8.3887e+06	4.88035e+06	1.12646e+07	8.27479e+06	1.46487e+07	8.13639e+06	3.50542e+06	1.22923e+07	7.98647e+06	7.58134e+06	9.58545e+07	1.01699e+07	6.31863e+06	8.75234e+06	9.1272e+06	6.97124e+06	1.86688e+06	8.58945e+06	9.52741e+06	8.65412e+06	6.61929e+07	8.19958e+06	1.83256e+06	1.04028e+07	3.89005e+06	3.32343e+07	6.5304e+06	1.78065e+07	3.21662e+06	1.28871e+07	7.9194e+06	4.40444e+06	6.17296e+07
Q15642	Cdc42-interacting protein 4	TRIP10	2.5e-08	1.59059e+06	983937	1.4777e+06	644766	929145	824934	166472	110201	1.30223e+06	0	3.12121e+06	0	147596	1.76591e+06	172035	1.09471e+06	0	1.5399e+06	358584	0	1.18628e+06	0	232668	0	0	517664	206688	146733	0	2.52527e+06	994327	700779	156522	636749	507252	0	0	1.84266e+06	1.14139e+06	0	0	1.63608e+06	503123	387968	121832	0
Q15648	Mediator of RNA polymerase II transcription subunit 1	MED1	0.00126361	0	0	0	0	0	0	47378.6	0	0	0	33618.2	0	9681.28	24653.6	0	0	0	31718.6	0	0	0	0	17455.3	0	13433.6	33090.2	0	0	277889	0	0	75043.7	0	0	0	0	147732	41100.1	52697.8	0	203589	173661	0	0	167367	0
Q15758	Neutral amino acid transporter B(0)	SLC1A5	0.0750946	718706	0	0	241692	0	0	0	0	0	0	735327	0	0	0	0	0	284843	0	0	0	0	0	0	0	234134	0	0	0	0	0	731886	127833	0	0	0	0	0	0	297277	0	146948	304702	0	0	0	0
Q15785	Mitochondrial import receptor subunit TOM34	TOMM34	0.0349285	608513	1.2321e+06	714623	317150	1.06171e+06	4.46689e+06	385587	1.33186e+06	525545	393744	1.54272e+06	850378	1.16114e+06	1.38289e+06	1.05488e+06	2.24847e+06	2.27224e+06	3.46753e+06	90771.7	773967	1.62531e+06	2.16217e+06	613858	538846	2.03611e+06	1.38915e+06	755862	3.0761e+06	334877	617145	1.95375e+06	158266	807906	395061	265544	643977	8.95685e+06	232297	3.24588e+06	2.37237e+06	3.51509e+06	7.27354e+06	3.82739e+06	5.80911e+07	462628	1.10782e+06
Q15796	Mothers against decapentaplegic homolog 2	SMAD2	9.47e-07	0	1.67941e+06	1.93522e+06	389663	1.11029e+06	4.07938e+06	1.15951e+06	0	311157	781997	0	388574	587683	2.08059e+06	306008	1.26036e+06	1.09448e+06	1.49413e+06	0	2.55262e+06	129936	1.07452e+06	1.25918e+06	350023	0	458837	521082	1.25722e+06	591300	1.20262e+06	1.53862e+06	1.23039e+06	197523	580381	1.46904e+06	218954	1.12718e+06	1.46264e+06	2.89872e+06	378695	1.02953e+06	2.06755e+06	1.67498e+06	521557	286815	1.50282e+06
Q15814	Tubulin-specific chaperone C	TBCC	0.0808082	753309	1.65905e+06	196364	129665	242566	531798	128034	713316	0	441192	1.90636e+06	137613	321055	1.61808e+06	0	0	1.43985e+06	618352	0	0	135648	193623	0	0	1.80428e+06	0	121131	281772	116626	375493	528431	0	2.65782e+06	0	1.08221e+06	169000	0	0	2.02785e+06	440242	1.05846e+06	1.99098e+06	1.41831e+07	1.19242e+06	347727	1.29421e+06
Q15833	Syntaxin-binding protein 2	STXBP2	0.00681177	4.01706e+06	4.22677e+06	954491	392064	720469	1.19362e+06	3.89687e+06	2.47566e+06	4.48598e+06	625321	1.75488e+07	3.64511e+06	3.95166e+06	2.07589e+06	587350	2.74571e+06	3.86631e+06	2.60346e+06	2.54684e+06	2.90209e+06	2.61348e+06	2.38933e+06	1.84589e+06	361486	2.26339e+06	4.32833e+06	4.19058e+06	1.39551e+06	1.05751e+06	2.70404e+06	6.22263e+06	2.95994e+06	4.66842e+06	2.09814e+06	3.06862e+06	726429	3.3685e+06	5.01521e+06	3.16266e+06	2.22721e+06	2.26142e+06	5.45811e+06	1.51218e+06	2.33629e+06	4.22683e+06	8.05086e+06
Q16270	Insulin-like growth factor-binding protein 7	IGFBP7	8.71e-10	599144	1.6064e+06	5.7516e+06	3.28537e+06	717670	3.47032e+06	1.15301e+06	1.30868e+06	1.5166e+06	3.43081e+06	3.07952e+06	401080	1.11856e+06	7.04401e+06	377409	6.88578e+06	307435	2.87968e+06	1.77477e+06	0	1.37865e+06	647959	465201	835089	7.29619e+06	483788	2.75283e+06	2.44683e+06	353089	1.95173e+07	1.12138e+07	385472	6.83541e+06	3.82478e+06	7.08967e+06	568238	256695	6.67129e+06	1.33307e+06	742215	1.00969e+06	0	1.42321e+06	259033	3.60662e+06	611131
Q16512	Serine/threonine-protein kinase N1	PKN1	5.63e-08	0	64770.2	221309	0	46966.9	229641	63033.8	254831	163131	82075.7	688072	0	0	213286	0	1.21527e+06	0	99702.5	113808	97084.6	0	0	0	0	194419	0	237220	104063	0	310136	537562	0	73361.9	648710	307554	0	0	162054	84310.1	405551	111540	296598	624653	161347	156977	45380.7
Q16637	Survival motor neuron protein	SMN1	0.00019834	299673	0	0	0	619735	6.78011e+06	0	0	0	1.99768e+06	7.55248e+06	2.85885e+06	486227	422145	374340	3.44147e+06	0	0	1.37679e+06	0	0	2.36684e+06	588251	0	9.95898e+06	4.00654e+06	0	0	0	1.14582e+06	3.63935e+06	3.88567e+06	901149	480233	447469	841946	1.25274e+07	6.19871e+06	7.06131e+06	3.10049e+06	4.72252e+06	4.61522e+06	0	1.72698e+06	1.58076e+06	615041
Q16643	Drebrin	DBN1	8.42e-12	0	1.75436e+06	2.03983e+06	2.27576e+06	425470	204181	1.76237e+06	316414	553511	133802	2.28406e+06	0	310719	2.04092e+06	95798	1.48001e+06	130401	1.28543e+06	0	145448	0	247295	534366	175518	2.49911e+06	285382	193477	919910	0	3.50206e+06	2.14478e+06	310638	237252	3.63314e+06	7.96932e+06	4.55657e+06	0	2.14387e+06	2.75175e+06	258394	368641	67175.2	219478	99709.9	315690	4.732e+06
Q16647	Prostacyclin synthase	PTGIS	4.89e-06	0	4.57859e+06	4.7882e+06	1.06302e+07	188612	0	0	0	1.73153e+06	0	3.28613e+06	0	0	7.08541e+06	0	382839	1.96438e+06	637830	183268	0	1.10551e+06	0	785467	0	5.26479e+06	0	1.38806e+06	212320	118260	1.14974e+07	5.17991e+06	0	0	3.91588e+06	5.81318e+06	0	0	0	0	0	0	0	0	0	0	0
Q16666	Gamma-interferon-inducible protein 16	IFI16	5.05e-06	217524	2.97839e+06	4.06089e+06	3.79971e+06	1.21618e+06	783449	5.0021e+06	981929	3.32192e+06	1.12811e+07	2.79162e+06	7.29811e+06	797694	2.03627e+07	833905	193796	1.46917e+06	972110	2.13563e+06	2.88941e+06	3.63082e+06	1.58793e+06	870834	592290	3.7275e+06	2.32408e+06	3.05047e+06	644323	474069	2.89358e+06	4.31573e+06	8.02744e+06	3.43717e+06	1.88544e+06	3.27623e+06	2.63466e+06	332372	1.16786e+06	3.40182e+06	798904	201665	319839	2.26781e+06	683431	1.85511e+07	475957
Q16773	Kynurenine--oxoglutarate transaminase 1	CCBL1	0.00024229	1.08792e+06	9.43338e+06	615852	1.07709e+06	4.39912e+06	1.62754e+06	7.71206e+06	750248	1.29907e+06	2.92757e+06	393890	2.67339e+06	4.11269e+06	1.22075e+06	367584	5.69667e+06	7.13856e+06	8.30553e+06	3.00906e+06	2.45727e+06	3.79613e+06	3.51769e+06	2.6437e+06	1.4454e+06	2.57484e+06	1.03027e+07	5.61651e+06	8.06148e+06	3.87056e+06	2.26358e+06	2.29337e+06	5.39133e+06	5.92633e+06	2.59449e+06	981538	624017	4.25893e+06	9.97165e+06	119969	4.69801e+06	5.88011e+06	1.43152e+06	0	477855	1.51399e+06	908836
Q16775	Hydroxyacylglutathione hydrolase, mitochondrial	HAGH	0.000106972	1.08235e+08	6.14169e+07	5.78056e+07	1.20771e+08	7.33165e+07	1.37105e+08	1.08457e+08	1.45337e+08	9.01836e+07	4.41436e+07	1.46137e+08	7.96841e+07	1.5722e+08	9.03262e+07	4.6515e+07	1.4228e+08	129391356	1.71986e+08	4.98975e+07	9.31471e+07	7.98409e+07	123838538	66104639	7.39056e+07	6.62928e+07	1.1305e+08	8.2456e+07	8.08114e+07	1.3122e+08	5.49494e+07	9.69236e+07	8.47215e+07	3.44612e+07	1.24229e+08	6.07404e+07	2.96939e+07	173787064	1.04522e+08	3.82001e+07	1.3627e+08	3.53306e+08	7.40185e+07	5.84508e+07	8.58792e+07	8.53749e+07	3.05293e+07
Q16822	Phosphoenolpyruvate carboxykinase [GTP], mitochondrial	PCK2	4.37e-08	3.30312e+08	1082791364	6.7463e+08	1125019504	1117273044	5.35275e+08	1238388037	6.2641e+08	7.5362e+08	5.76888e+08	1090154400	3.25568e+08	9.30467e+08	3.84142e+08	8.09085e+08	7.81534e+08	7.22369e+08	5.96627e+08	1098602833	8.76879e+08	428932670	7.82177e+08	6.63766e+08	4.25868e+08	7.58311e+08	1028743060	560370141	9.85489e+08	1160310217	9.1289e+08	3.23008e+08	5.48618e+08	1.3968e+08	1099684486	4.83298e+08	7.485e+08	1554213775	5.93603e+08	1.70141e+08	1027264437	1405976342	8.1483e+08	7.99156e+07	7.06407e+08	1608590490	140921447
Q16850	Lanosterol 14-alpha demethylase	CYP51A1	0.0912971	3.95995e+06	1.98311e+07	2.10288e+07	1.96472e+07	2.13574e+07	1.33976e+07	8.79229e+06	7.56536e+06	2.20674e+07	3.64363e+06	6.28556e+06	4.02853e+07	3.43444e+07	8.89257e+06	1.90687e+07	1.56747e+07	1.47452e+07	2.67492e+07	1.11713e+07	1.84898e+06	1.38853e+07	4.77544e+07	8.18915e+06	5.39536e+06	8.33944e+07	1.2204e+07	1.1654e+07	3.28528e+06	2.2066e+07	9.32018e+06	1.02364e+07	1.68841e+07	7.94818e+06	1.82217e+07	1.53966e+07	4.93992e+07	639841	7.92424e+06	3.22121e+07	1.66715e+07	1.49943e+07	9.60686e+06	1.59355e+07	8.18167e+07	1.54022e+07	2.12043e+07
Q16853	Membrane primary amine oxidase	AOC3	0.0244276	107365	1.09989e+07	3.97175e+07	157280443	1.25966e+07	1.03916e+07	1.49305e+07	6.5416e+06	2.5482e+07	7.95189e+06	3.06065e+06	3.30614e+06	3.83782e+06	1.36178e+07	1.83496e+06	1.08862e+07	1.26759e+07	4.6152e+06	1.79163e+07	1.66212e+06	1.43982e+06	3.20542e+06	1.02936e+07	3.44549e+06	3.06518e+07	6.81042e+06	4.39164e+06	3.94263e+06	6.48444e+06	4.48398e+07	1.20363e+07	2.41693e+06	1.75529e+06	1.93318e+07	5.99523e+07	3.40651e+06	947586	1.3697e+07	1.96661e+06	3.40974e+06	2.87989e+06	128675	994895	1.22261e+06	5.79496e+06	702391
Q29RF7	Sister chromatid cohesion protein PDS5 homolog A	PDS5A	1.56e-06	294756	2.3511e+06	370773	381432	1.02528e+06	326871	1.31136e+06	1.31331e+06	0	455687	5.41606e+06	786998	1.27651e+06	1.7891e+06	116950	709169	1.50414e+06	934023	184417	1.43519e+06	0	684782	518318	65567.6	1.50272e+06	1.48866e+06	175171	703866	172371	334361	1.54868e+06	940808	121613	510121	1.27079e+06	1.4842e+06	2.40587e+06	2.0721e+06	2.23397e+06	1.4266e+06	3.94647e+06	2.76674e+06	1.60624e+06	3.138e+06	2.43038e+06	1.02614e+06
Q2TAL8	Glutamine-rich protein 1	QRICH1	5.48e-05	860647	756121	801617	486259	1.23223e+06	1.39187e+06	717115	0	949175	948127	1.52425e+06	1.07939e+06	722219	796596	866341	0	984572	307331	202207	0	584772	1.13687e+06	1.56576e+06	110027	329881	2.32651e+06	915784	687601	0	384437	1.29868e+06	1.42865e+06	377909	215006	2.99128e+06	718157	3.33641e+06	3.55688e+06	2.68375e+06	2.55312e+06	2.51723e+06	920705	1.30055e+06	1.57029e+06	2.10949e+06	4.71504e+06
Q2TB90	Putative hexokinase HKDC1	HKDC1	0.123521	4.02216e+06	1.3285e+07	56646.8	547561	0	0	0	1.48273e+07	542070	1.87973e+06	5.42385e+07	1.2128e+07	1.62261e+07	8.25804e+06	5.69858e+06	1.29964e+07	3.99662e+06	7.20613e+06	687437	5.60293e+07	3.94357e+06	636277	202813	0	530940	1.17858e+07	1.11528e+07	6.32588e+06	2.14168e+06	1.15016e+06	1.55061e+07	2.19594e+07	2.04204e+06	667535	1.9284e+07	3.28067e+06	66207.2	1.94818e+06	3.48283e+06	7.77055e+06	85052.8	2.47348e+07	0	0	0	1.42596e+06
Q32P41	tRNA (guanine(37)-N1)-methyltransferase	TRMT5	0.0685854	0	0	79355.8	0	0	108552	0	307965	81913.9	0	177652	219346	0	0	0	0	154402	50513.4	0	132086	0	0	231905	58930.6	256564	80422.1	764746	0	62495.8	0	206914	135024	214832	0	34320.2	0	95000.2	3.27953e+06	131859	0	547154	0	319700	1.41796e+06	0	1.03089e+06
Q3KQU3	MAP7 domain-containing protein 1	MAP7D1	0.0430197	0	133759	189043	0	0	0	0	0	72706.5	0	55521.5	0	0	187454	0	0	0	120798	0	0	0	0	0	0	241275	0	0	0	0	140139	161594	0	103445	637996	0	144699	0	130040	0	0	21438.4	0	0	0	0	0
Q3KQV9	UDP-N-acetylhexosamine pyrophosphorylase-like protein 1	UAP1L1	0.273455	3.3833e+06	140280	169539	190548	299037	0	0	0	159414	0	1.38382e+07	73241.4	0	334926	0	0	138063	141507	0	0	0	0	0	0	0	2.29878e+06	0	0	0	0	235670	0	480554	0	230530	91240	0	278860	98257.6	0	0	0	0	0	0	0
Q3LXA3	Bifunctional ATP-dependent dihydroxyacetone kinase/FAD-AMP lyase (cyclizing);ATP-dependent dihydroxyacetone kinase;FAD-AMP lyase (cyclizing)	DAK	0.000353128	9.79904e+07	1.49111e+08	2.45094e+08	5.45892e+08	7.20445e+07	5.84575e+07	1.9841e+08	1116899435	7.22869e+08	1.51033e+07	3.11838e+08	1.66206e+08	1.28029e+08	1.36138e+08	6.12775e+08	1.94625e+08	1027307026	1877547451	5.93756e+08	2.71465e+08	4.34959e+08	1.12582e+08	9.58273e+07	576219901	5.79031e+07	2.50654e+07	7.55311e+08	7.72226e+07	2.74158e+08	1.20628e+08	6.72023e+08	3.4697e+08	2.39187e+07	395930190	2.90213e+08	7.29094e+07	2.66807e+08	3.70677e+07	3.65588e+07	3.28022e+07	1.21755e+07	4.00122e+07	1.03074e+07	7.9722e+07	4.9873e+07	1.16007e+08
Q3SY69	Mitochondrial 10-formyltetrahydrofolate dehydrogenase	ALDH1L2	3.46e-06	0	0	60079.6	0	0	0	0	0	0	0	682542	0	0	339331	0	0	0	32899.6	0	0	0	0	0	0	0	0	0	0	0	0	226900	0	40390.6	0	468348	0	0	0	0	0	0	0	0	0	0	0
Q3YEC7	Rab-like protein 6	RABL6	0.00079669	0	564227	524598	513896	79110.8	0	310124	0	412939	151361	0	0	300796	375924	128822	0	0	0	0	0	141075	235539	137941	75929.4	0	220132	246318	135398	0	553676	82518.9	144928	538863	383534	0	0	0	549360	114930	149076	94758.1	252974	0	52027.1	245209	612783
Q460N5	Poly [ADP-ribose] polymerase 14	PARP14	8.69e-05	135015	605000	9.16344e+06	214951	47839.9	726146	1.25059e+06	257397	474016	582167	677763	291710	507095	1.75377e+06	201367	642875	930800	270833	350135	524401	495085	830956	529805	286706	666739	100100	330838	30501.2	519376	311583	398418	273455	0	794775	1.25365e+06	876984	196527	168411	1.69764e+06	261531	169243	144141	175183	669480	1.2204e+06	2.60152e+06
Q4J6C6	Prolyl endopeptidase-like	PREPL	0.0468438	0	0	0	0	352393	0	0	941940	0	0	0	127763	139301	720600	99178.2	39991.6	164847	0	0	642023	1.70754e+06	87387.1	501402	148454	126652	463731	0	0	101417	227901	144352	0	1.40676e+06	93503.9	343103	0	57579.4	119839	141978	125825	108629	446764	833418	770983	363894	578389
Q53FZ2	Acyl-coenzyme A synthetase ACSM3, mitochondrial	ACSM3	0.000343175	2.24198e+06	1.38739e+07	9.32919e+06	4.11761e+07	7.47765e+06	386963	1.8835e+07	9.78159e+06	7.58026e+06	8.27304e+06	2.33026e+06	1.22401e+06	8.89569e+06	1.87924e+06	7.41198e+06	4.81582e+06	3.33032e+06	4.91889e+06	3.25636e+07	3.49276e+06	6.95569e+06	1.63359e+07	3.43927e+07	5.93343e+06	2.20211e+06	7.28844e+06	2.671e+06	2.10467e+06	1.00314e+07	988463	5.58829e+06	599233	0	2.37249e+07	1.53337e+06	688546	6.21967e+06	1.34781e+07	0	3.19448e+06	1.3056e+07	617739	1.1135e+06	6.93527e+06	4.31556e+06	87873.5
Q53GG5	PDZ and LIM domain protein 3	PDLIM3	1.38e-08	0	4.36689e+06	5.52813e+06	1.76044e+06	0	1.1429e+06	316716	0	832801	0	962436	171870	165473	2.40901e+06	0	3.90115e+06	0	4.50704e+06	1.0912e+06	0	0	0	320827	226651	8.43558e+06	563511	408216	3.62772e+06	556820	1.4763e+07	2.52256e+06	0	799370	2.2882e+06	4.14557e+06	0	0	1.01878e+06	0	0	373148	0	1.13203e+06	0	0	0
Q53GS9	U4/U6.U5 tri-snRNP-associated protein 2	USP39	9.26e-10	596407	3.05373e+06	1.82027e+06	1.43601e+06	2.42767e+06	3.00115e+06	1.20376e+06	1.29075e+06	784245	1.09543e+06	3.38479e+06	3.1149e+06	841141	4.27522e+06	553676	1.34758e+06	2.11874e+06	2.04925e+06	216876	2.85577e+06	2.02683e+06	588918	2.16029e+06	179354	1.34693e+06	1.25777e+06	2.11585e+06	1.66836e+06	292579	607653	3.6355e+06	3.09518e+06	499235	258239	5.56114e+06	2.72846e+06	6.91186e+06	5.76875e+06	6.27691e+06	5.17385e+06	2.82424e+06	1.05965e+07	3.56494e+06	1.70227e+06	5.61097e+06	3.00637e+06
Q53SF7	Cordon-bleu protein-like 1	COBLL1	0.0156542	1.93053e+07	6.1379e+06	7.87121e+06	4.67953e+06	2.77699e+06	7.25197e+06	6.01792e+06	4.80729e+06	2.26279e+06	3.03428e+06	2.48936e+06	2.21962e+06	6.52795e+06	5.22472e+06	7.5894e+06	4.22504e+06	6.18027e+06	3.07657e+06	3.14281e+06	372495	4.66257e+06	6.57999e+06	2.52619e+06	1.3419e+07	6.42742e+06	4.5257e+06	2.96103e+06	1.12214e+06	9.31624e+06	1.4621e+06	2.50978e+06	2.30905e+06	1.1833e+06	1.44949e+07	4.68791e+06	188740	1.15965e+06	728096	2.858e+06	813680	1.68416e+06	1.42446e+07	1.54708e+07	7.10385e+06	1.46666e+06	5.79888e+06
Q56VL3	OCIA domain-containing protein 2	OCIAD2	0.0781678	5.50116e+07	1.96444e+07	8.98925e+06	2.93997e+07	1.43397e+06	1.26052e+07	1.29862e+07	2.75044e+07	1.83621e+07	4.38587e+06	9.82688e+06	2.25721e+07	1.72064e+07	1.89326e+07	1.85055e+07	3.20753e+07	1.52511e+07	3.21e+07	6.75587e+06	3.28383e+06	1.50705e+07	1.64254e+07	3.63396e+07	541238	9.55839e+06	8.63656e+06	3.04026e+07	2.30911e+07	1.81908e+07	9.5063e+06	2.72295e+07	1.30798e+07	4.33951e+06	1.94479e+07	1.71484e+06	2.86176e+07	7.64037e+06	1.43133e+06	5.93238e+06	2.43844e+06	869561	1.69518e+07	3.93759e+06	188953	8.77962e+06	711665
Q5BJF2	Transmembrane protein 97	TMEM97	2.11e-05	2.65267e+07	1.89069e+07	4.50736e+07	6.84116e+07	8.29812e+07	2.86512e+07	2.56923e+07	2.51428e+07	2.39085e+07	4.8274e+06	3.86805e+07	2.16337e+07	2.14552e+07	1.84076e+07	3.4137e+07	1.65185e+07	1.07877e+07	5.25097e+07	1.60571e+07	1.34311e+06	1.4658e+07	4.39871e+07	9.32461e+07	2.21036e+07	6.83335e+07	3.65609e+07	2.09336e+07	9.38841e+06	9.68588e+07	1.49649e+07	3.86039e+07	3.22497e+07	9.61355e+06	4.74081e+07	3.73541e+06	7.22983e+07	1.67264e+07	4.56967e+07	5.90603e+07	2.03141e+08	5.00985e+07	2.1967e+08	1.7736e+07	2.39159e+08	1.48489e+07	1.0831e+08
Q5HYK3	2-methoxy-6-polyprenyl-1,4-benzoquinol methylase, mitochondrial	COQ5	3.67e-05	1.50417e+06	1.31567e+07	8.02782e+06	1.4709e+07	2.20875e+07	1.11121e+07	1.6691e+07	1.6123e+07	9.03747e+06	8.21695e+06	2.56685e+07	1.33178e+07	7.56671e+06	4.56258e+06	1.46884e+07	3.48529e+07	1.54424e+07	2.81888e+07	9.43684e+06	1.85006e+07	5.48074e+06	2.12332e+07	3.39286e+07	2.99238e+06	1.84805e+07	1.24367e+07	1.33902e+07	2.25966e+07	1.02772e+07	8.73614e+06	2.40809e+07	1.70842e+07	2.06673e+07	1.19963e+07	9.12946e+06	1.41622e+07	3.00663e+07	1.15058e+07	3.68188e+06	1.99247e+07	5.43686e+07	3.6713e+06	7.91627e+06	1.71308e+07	1.91684e+07	9.10194e+06
Q5JPH6	Probable glutamate--tRNA ligase, mitochondrial	EARS2	0.00101408	3.11299e+06	2.65741e+06	2.16088e+06	2.81648e+06	3.82206e+06	2.931e+06	5.82628e+06	4.35112e+06	75311.5	2.55573e+06	6.93438e+06	6.29611e+06	1.88079e+06	3.4308e+06	7.52271e+06	2.04334e+06	3.14194e+06	2.58906e+06	2.908e+06	1.51196e+07	3.62627e+06	3.8378e+06	1.84469e+07	1.59096e+06	3.53748e+06	1.13084e+07	1.00692e+07	2.20568e+06	1.90798e+06	826664	2.39814e+06	7.63821e+06	3.62921e+06	3.81149e+06	5.43365e+06	1.38626e+06	1.26243e+06	4.38033e+06	1.09917e+06	8.16363e+06	1.44958e+06	4.09171e+06	4.04107e+06	3.83135e+06	8.26173e+06	4.98294e+06
Q5JSL3	Dedicator of cytokinesis protein 11	DOCK11	0.00905605	0	0	187326	0	0	0	0	109031	27413.7	69995.9	20239.7	0	0	180375	727359	0	0	39818.3	82689	19461.8	107153	0	167016	124524	118229	0	0	0	0	0	0	29709.8	251626	0	57765.2	59256.8	0	240477	0	273421	0	0	0	0	1.68526e+06	0
Q5JVF3	PCI domain-containing protein 2	PCID2	0.00014425	244148	433235	296428	625100	1.14916e+06	713686	545709	0	61401.3	464344	1.23353e+06	1.53816e+06	763834	1.0744e+06	282217	778338	2.03525e+06	154561	202571	576880	401876	120903	735350	0	0	377702	456199	534199	1.2858e+06	139143	786830	671704	205940	348708	666244	564666	363117	1.40917e+06	2.7345e+06	223994	580112	1.66856e+06	1.20673e+06	844559	1.23714e+06	731790
Q5K651	Sterile alpha motif domain-containing protein 9	SAMD9	0.0102958	0	90675	49017.7	0	0	25161.5	185619	0	0	137914	0	0	0	0	0	0	194284	0	0	0	0	48866.7	60717.4	0	0	0	89027.5	0	1.08547e+06	0	107227	0	24699.2	0	24281.9	655612	0	0	0	0	0	0	0	0	560293	0
Q5M775	Cytospin-B	SPECC1	0.000894778	0	0	0	43305.2	0	0	0	0	0	0	0	223164	0	55624	0	60882.3	368858	0	0	0	0	371278	830219	0	0	0	0	0	0	733603	0	0	461857	0	53122.7	32114.6	0	0	0	0	0	0	0	0	0	0
Q5SRE5	Nucleoporin NUP188 homolog	NUP188	0.0838908	52778	148977	285871	120312	160379	298357	205636	0	451288	146553	97973.6	412663	79072.8	848981	89995.3	16692.1	173938	134408	369457	324311	63224.1	225430	365837	52800.9	199870	80174.4	133215	373218	0	92520.4	371791	176645	107295	0	150863	350680	441776	378460	414448	134859	336832	1.18877e+07	134811	650575	77154.5	716754
Q5SW79	Centrosomal protein of 170 kDa	CEP170	0.043005	20994.5	0	137928	880073	0	30338.6	0	89101	22137.6	392557	0	20070	0	632808	0	23726.9	0	0	0	488540	92617.2	83459.3	0	0	141578	0	804165	0	529895	9875.38	19099.8	27912.6	0	0	32044.7	0	14937.5	198307	0	31610	87348.2	39316.1	0	0	0	2.90839e+06
Q5T2W1	Na(+)/H(+) exchange regulatory cofactor NHE-RF3;Putative PDZ domain-containing protein 1P	PDZK1;PDZK1P1	5.09e-06	1.09088e+08	3.2859e+07	6.115e+07	9.28246e+06	2.41699e+07	1.18186e+07	2.34991e+07	6.22678e+07	5.38363e+07	1.43525e+07	2.9996e+07	2.63887e+07	7.68663e+07	3.44195e+07	7.24569e+06	4.06512e+07	6.53411e+07	1.34184e+07	2.91247e+07	5.12153e+06	1.71852e+07	6.68929e+07	8.53878e+06	6.69846e+07	2.24722e+07	2.83213e+07	3.90051e+07	1.20088e+07	3.91436e+07	1.81341e+07	2.29517e+07	4.08202e+07	5.79502e+06	3.24045e+07	3.01287e+07	2.88731e+07	3.63002e+07	1.11756e+08	5.33657e+07	4.28294e+07	9.36369e+06	2.40648e+08	4.00976e+07	1.72925e+08	1.31512e+07	9.92851e+07
Q5T8D3	Acyl-CoA-binding domain-containing protein 5	ACBD5	0.000569565	1.24679e+07	1.55061e+07	8.14015e+06	8.45455e+06	11345306	2.24453e+07	8.61406e+06	1.40588e+07	2.98954e+07	1.17522e+07	2.57406e+07	1.67791e+07	8.79597e+06	7.25381e+06	1.29732e+07	2.60293e+07	9.3105e+06	1.93886e+07	4.97718e+06	5.00002e+07	5.62248e+06	2.89423e+07	2.26214e+07	4.07977e+06	1.28816e+07	1.62594e+07	2.64873e+07	9.02691e+06	9.26239e+06	5.87124e+06	1.45611e+07	1.65952e+07	6.26308e+06	1.95332e+07	7.6516e+06	4.14021e+07	1.62961e+07	1.34106e+07	2.93359e+06	2.2542e+07	6.13529e+07	1.14594e+07	2.19118e+06	2.04942e+07	1.11617e+07	1.15194e+06
Q5T8P6	RNA-binding protein 26	RBM26	0.000613408	0	688696	469352	222108	336137	918669	167779	209559	270691	963411	502519	463297	567010	761117	233346	402033	1.04527e+06	986288	235825	333715	1.03138e+06	83745.1	149299	170901	316185	768471	453165	630006	0	1.0343e+06	658558	57772.8	305689	390921	1.8312e+06	1.0989e+06	272859	1.29636e+06	2.20574e+06	1.04865e+06	839112	2.65192e+06	737095	333811	554267	1.31322e+06
Q5TBB1	Ribonuclease H2 subunit B	RNASEH2B	0.265957	298640	0	206888	161276	58450.1	0	44015.5	383160	99576.6	0	662087	0	0	93461.5	0	68727.5	0	0	166010	91269.4	0	4.91469e+07	50164.4	0	89910.9	703864	89274.1	0	0	0	159056	0	0	0	134569	0	0	63151.1	1.71222e+06	412437	72734.3	1.11758e+08	0	719504	262987	0
Q5TC12	ATP synthase mitochondrial F1 complex assembly factor 1	ATPAF1	0.00110837	0	4.24978e+06	6.47084e+06	2.37082e+06	4.84316e+06	1.18952e+06	9.54328e+06	2.80273e+06	1.82557e+06	5.66885e+06	7.61245e+06	5.91904e+06	4.80693e+06	2.42675e+06	4.43417e+06	5.58261e+06	6.23894e+06	7.58137e+06	2.65526e+06	1.00069e+07	3.46054e+06	2.91677e+06	3.98186e+06	4.56661e+06	2.32782e+06	5.03695e+06	4.2553e+06	5.14114e+06	5.91125e+06	1.37832e+06	4.36964e+06	4.59473e+06	4.15535e+06	3.2626e+06	2.02197e+06	2.90228e+06	1.68074e+06	8.81335e+06	5.32349e+06	973790	5.67914e+06	3.30472e+06	2.23529e+06	1.24609e+06	9.79574e+06	2.20865e+06
Q5TEJ8	Protein THEMIS2	THEMIS2	1.61e-09	0	1278193	386052	205437	161424	0	212502	0	627551	234454	458575	238029	242563	189076	507216	0	944967	0	590322	0	0	0	137653	0	189948	532446	138733	113083	0	579961	437118	414410	297644	608688	275311	382481	0	128220	408185	235322	0	0	43234	0	910643	0
Q5VT52	Regulation of nuclear pre-mRNA domain-containing protein 2	RPRD2	0.0447594	357246	107729	332717	82382.7	339379	588275	162877	165733	173444	215470	399303	1.11835e+06	21899	1.10474e+06	0	239889	187532	76722	87133.4	299189	0	247739	133148	152454	858873	2.6184e+06	20611	27402	132013	143883	436600	297442	34679.1	43722.1	608456	0	1.93573e+06	3.50801e+06	839553	1.49148e+06	1.46185e+06	1.07534e+06	219921	142190	3.00734e+06	458920
Q5VT66	Mitochondrial amidoxime-reducing component 1	43525	0.00785567	0	2.95801e+06	1.50599e+06	6.91714e+06	7.81651e+06	3.38659e+06	1.53054e+07	882236	1.97632e+07	0	1.7666e+06	2.14076e+06	191196	2.45691e+06	2.55243e+06	1.09597e+06	5.29418e+06	5.32925e+06	1.57539e+07	250951	4.30096e+06	6.20585e+06	878358	2.38215e+06	1.83736e+06	6.89912e+06	5.52209e+06	492881	1.83334e+06	881142	1.64225e+06	2.20529e+06	765676	4.05635e+06	9.48044e+06	1.80024e+06	6.67186e+06	1.06672e+07	2.91435e+06	5.08204e+06	2.34039e+07	7.65076e+06	4.16552e+06	1.01533e+06	8.45691e+06	1.84137e+06
Q5VTL8	Pre-mRNA-splicing factor 38B	PRPF38B	0.00109182	0	374392	0	0	0	0	341860	0	0	278254	602515	0	0	349262	0	458379	0	504815	500468	0	0	467416	339701	0	358302	321887	0	0	0	0	788527	0	0	244416	0	163491	460017	1.67928e+06	0	1.92523e+06	333165	674542	0	0	785869	0
Q5VTR2	E3 ubiquitin-protein ligase BRE1A	RNF20	9.74e-05	402932	460820	392192	117907	594311	425118	259610	105306	615675	282116	532430	534592	988959	437860	219530	127331	1.38752e+06	80705.6	206716	453542	379772	1.15515e+06	321311	249203	369896	592427	218269	156258	870324	469707	817659	432592	201436	447710	1.17015e+06	171645	963501	1.3192e+06	728815	1.91718e+06	2.26394e+06	1.93996e+06	304864	628725	1.24753e+06	1.46971e+06
Q5VW38	Protein GPR107	GPR107	0.00213766	0	82766.6	147520	0	261115	166135	722841	173627	0	188915	280917	806417	342614	311446	0	273516	0	0	0	377449	0	1.08231e+06	1.08046e+06	246542	474840	229250	292077	0	198549	0	337545	542296	118936	371703	167140	544932	0	422211	443286	562070	553845	2.47357e+06	408289	592302	1.21623e+06	869139
Q5VZE5	N-alpha-acetyltransferase 35, NatC auxiliary subunit	NAA35	0.0158572	356671	0	174692	157242	116810	0	53758.3	86005.3	153517	56557.8	437114	1.48446e+06	244586	110867	0	130507	132496	177325	0	195067	0	361981	153836	0	183384	0	654522	360260	130695	0	138746	288000	154796	130736	0	0	440542	1.44159e+06	312902	545784	652131	611851	85051.7	143660	6.24842e+06	414136
Q5VZK9	Leucine-rich repeat-containing protein 16A	LRRC16A	0.0014327	0	90435.7	0	90489	0	1.12158e+06	0	0	0	0	118784	441796	0	0	25806.3	125091	41124.8	134707	0	0	0	0	54284.4	0	0	382864	0	0	0	21364.9	42220	0	0	0	118920	0	0	1.87812e+06	63361.6	684609	130583	724792	27136.5	0	42762.7	3.86371e+06
Q5ZPR3	CD276 antigen	CD276	5.69e-05	496757	676604	1.02958e+06	1.64966e+06	165281	0	153345	1.37235e+06	0	463730	1.4254e+06	338687	0	1.6302e+06	0	444719	565435	0	232795	359510	99981.8	0	2.46993e+06	451746	2.44572e+06	442712	648937	360807	763984	0	838518	524293	0	1.2983e+06	2.12592e+06	2.16473e+06	0	1.01667e+06	5.69446e+06	755236	0	792432	0	248531	0	1.44719e+06
Q63HM1	Kynurenine formamidase	AFMID	0.0388271	2.09929e+07	2.02774e+07	7.96862e+06	8.71524e+06	2.26359e+06	1.71454e+07	3.3055e+08	2.97105e+07	8.96774e+06	2.61914e+06	2.29697e+07	3.71527e+06	3.71514e+07	5.26603e+06	9.75595e+06	1.94664e+07	8.09562e+06	8.62653e+06	1.69278e+07	3.22993e+07	1.28752e+06	9.40532e+06	1.4641e+06	8.31156e+06	6.52377e+06	8.6023e+06	1.91477e+07	2.41792e+06	2.60136e+07	1.05117e+06	4.84678e+06	5.93685e+06	2.02271e+06	1.06177e+08	7.27015e+06	0	1.31686e+06	0	2.34208e+07	1.84857e+06	1.62672e+07	1.91244e+07	0	4.99175e+06	9.7733e+06	6.92051e+06
Q66PJ3	ADP-ribosylation factor-like protein 6-interacting protein 4	ARL6IP4	0.00222439	0	0	210441	0	0	872609	4.61452e+06	1.05722e+06	0	0	4.69574e+06	0	0	1.5424e+06	0	0	1.15233e+06	0	78596.4	546493	1.41069e+06	175332	123165	0	428305	0	0	553624	0	0	0	614754	0	150855	130206	0	2.63804e+06	5.16983e+06	0	1.86282e+06	3.92872e+06	2.80463e+06	977128	0	2.27314e+06	175298
Q676U5	Autophagy-related protein 16-1	ATG16L1	0.0461483	402250	341820	325851	0	3.67643e+06	0	331565	218490	67397.8	0	232592	707126	359627	1.02081e+06	0	0	780787	731082	524324	334219	157979	188479	81788.3	71916.6	156564	3.00144e+06	420849	383392	105902	0	533258	323466	90812.6	0	933638	0	588831	649648	73028.3	373241	0	141976	213422	318933	380974	2.17022e+06
Q68CK6	Acyl-coenzyme A synthetase ACSM2B, mitochondrial	ACSM2B	1.2e-06	4.29042e+08	2.57185e+08	3.50838e+08	389705552	6.73925e+08	3.23905e+08	3.1334e+08	4.84418e+08	4.58827e+08	7.10117e+06	2.36767e+07	4.78558e+08	5.02625e+08	1.1009e+08	3.15573e+08	310020956	4.34337e+08	2.90772e+08	2.75052e+08	4.6443e+08	4.17912e+08	3.73079e+08	66242603	160445960	1.24853e+08	4.19065e+08	2.05173e+08	5.02702e+08	1.66206e+08	3.60463e+08	6.26874e+08	1.75903e+08	3.25471e+08	4.00636e+08	3.25284e+08	1.00592e+08	3.35967e+08	2.79464e+08	7.86458e+06	5.20865e+08	3.75453e+08	1.43345e+08	168932969	1060405568	2.42577e+08	8.02653e+07
Q68E01	Integrator complex subunit 3	INTS3	0.000117762	476127	247192	346287	218267	1.18834e+06	134029	2.47831e+06	578627	3.61163e+06	568323	708872	477102	158240	821864	241797	36072.1	229421	83074	34190.5	669494	829086	195244	585477	125148	654919	593912	286443	827800	94727.2	150427	942462	195800	93450.9	222918	366839	1.03933e+06	484985	4.98629e+06	1.24468e+06	1.76263e+06	683697	950731	172435	792402	3.34349e+06	1.26737e+06
Q69YN2	CWF19-like protein 1	CWF19L1	9.39e-06	1.79752e+06	1.30383e+06	495735	90212.7	621293	443774	1.53613e+06	391362	485543	1.07366e+06	2.4161e+06	1.96632e+06	870801	1.00545e+06	676242	283783	986945	0	145100	171289	0	0	432936	142684	1.0751e+06	2.40097e+06	0	466921	137394	1.75029e+06	1.63013e+06	6.60029e+06	184220	146413	1.4217e+06	777641	2.214e+06	3.45312e+06	3.15265e+06	4.50877e+06	4.97453e+06	3.1558e+06	860133	2.73437e+06	6.46457e+06	3.8074e+06
Q6BDS2	UHRF1-binding protein 1	UHRF1BP1	0.072714	61422	0	0	0	0	58159.6	0	0	0	120332	263358	0	0	0	0	0	293084	0	0	27227.6	105778	0	0	0	0	0	0	0	0	0	0	0	0	0	0	0	0	0	0	106905	40204.1	182153	0	45534.1	0	0
Q6DD87	Zinc finger protein 787	ZNF787	5.81e-06	2.48286e+06	154184	1.21655e+06	522968	1.03657e+06	0	2.68553e+06	692678	1.75115e+06	4.8218e+06	1.31378e+06	1.47221e+06	2.41715e+06	3.24893e+06	487963	0	3.48064e+06	0	315937	69493.1	453412	4.23158e+06	1.35595e+06	639089	1.78709e+06	384917	557136	3.23285e+06	1.24879e+06	452587	2.18147e+06	4.17505e+06	1.77067e+06	647886	3.31309e+06	302611	8.14646e+06	8.06652e+06	5.53056e+06	3.53984e+06	765699	1.21469e+07	0	3.26626e+06	3.30542e+06	8.57331e+06
Q6DKJ4	Nucleoredoxin	NXN	0.000550993	0	0	669309	781241	0	0	0	0	0	728067	0	0	1.21926e+06	1.0327e+06	0	0	0	0	175831	0	0	0	0	0	167783	154402	0	0	187441	732643	0	320576	0	159741	927119	0	0	204400	0	0	195901	0	680069	1.11633e+06	0	0
Q6GTX8	Leukocyte-associated immunoglobulin-like receptor 1	LAIR1	4.91e-05	0	0	0	0	0	0	0	888140	366415	0	450825	0	292631	259068	0	0	0	0	0	0	0	0	2.18775e+06	0	0	0	607475	0	0	0	879903	0	944477	0	328164	563879	0	219965	1.02488e+06	3.50985e+06	0	0	0	0	0	0
Q6I9Y2	THO complex subunit 7 homolog	THOC7	0.000601594	0	0	0	266210	810626	0	0	0	200848	0	906271	0	730419	614202	0	147749	315307	0	0	0	0	0	0	214335	942490	0	0	0	0	0	1.08376e+06	83084.7	0	0	0	0	664597	0	2.30174e+06	889546	1.91112e+06	0	3.66785e+06	0	203176	0
Q6IB77	Glycine N-acyltransferase	GLYAT	2.36e-09	9.95675e+07	2.96946e+08	1.45843e+08	4.36618e+08	3.75208e+08	5.12582e+07	1.4433e+08	2.50221e+08	2.13045e+08	1.23089e+08	8.22954e+07	1.27387e+07	190013121	1.8645e+07	1.99164e+08	2.31154e+08	1.99623e+08	1.43131e+08	4.47679e+08	1.82179e+08	1.98292e+08	1.24762e+08	5.347e+08	1.04165e+08	5.81359e+07	1.83776e+08	1.60401e+08	2.95517e+08	2.07154e+08	2.39691e+08	4.21283e+08	7.37246e+07	1.27246e+06	4.41567e+08	4.37184e+07	1.90046e+08	3.62395e+08	6.88579e+07	7.07783e+06	5.04672e+07	6.7028e+07	7.87967e+07	3.99127e+07	1.01352e+08	1.42687e+07	0
Q6IN85	Serine/threonine-protein phosphatase 4 regulatory subunit 3A	SMEK1	0.0755401	537593	512507	254738	1.1669e+06	735546	953261	903618	327093	3.46532e+07	1.19409e+06	1.11072e+06	2.42304e+06	820720	1.2815e+06	0	712812	182420	690173	112597	466323	124262	1.15646e+06	400319	1.44173e+06	711609	68304.8	347328	143907	116278	283243	1.24748e+06	777171	471420	294859	1.59282e+06	285432	4.94587e+07	7.15732e+06	2.19466e+06	1.61395e+06	4.96922e+06	5.59579e+06	812999	2.01923e+06	5.55788e+06	1.80829e+07
Q6IQ22	Ras-related protein Rab-12	RAB12	0.000358787	1.68514e+07	2.51158e+06	1.77288e+07	3.73551e+06	1.14076e+06	2.06566e+06	981642	16425215	2.37987e+06	1.92749e+06	1.07485e+07	2.15336e+06	2.53049e+06	4.02304e+06	168299	2.1845e+07	3.47275e+06	642512	1.37873e+07	2.20982e+06	1.38662e+07	1.64003e+07	1.26799e+06	1.7718e+07	7.93923e+06	4.90913e+06	2.16291e+06	2.52024e+06	3.29931e+07	9.45138e+06	1.74789e+07	1.83989e+06	2.63679e+06	3.07227e+06	2.41995e+06	4.14582e+06	5.60985e+06	2.02439e+06	859073	2.8507e+06	3.25437e+06	3.0225e+06	1.40401e+06	2.91033e+06	3.98468e+06	4.38198e+06
Q6JBY9	CapZ-interacting protein	RCSD1	8.96e-05	0	935919	1.1337e+06	620899	0	144218	741722	1.07425e+06	1.23344e+06	267097	1.01516e+06	0	285499	1.25754e+06	1.6573e+07	0	697682	11973.6	428370	1.77609e+06	263039	0	326571	0	906053	0	624999	242522	0	1.00568e+06	3.34663e+06	238155	832052	812947	546767	374972	139762	1.15712e+06	255242	252839	0	0	0	0	1.48776e+06	0
Q6NSJ0	Uncharacterized family 31 glucosidase KIAA1161	KIAA1161	4.11e-05	203714	0	0	0	0	0	1.15578e+06	301883	1.06539e+06	0	415148	211704	1.57585e+06	305220	0	378030	0	221152	354114	246785	0	404486	0	0	401775	261279	228302	0	0	0	604950	67116	0	204575	57231.3	613831	977371	1.64935e+06	138672	0	438653	116191	0	2.13474e+06	198320	341981
Q6NUK1	Calcium-binding mitochondrial carrier protein SCaMC-1	SLC25A24	0.000383709	0	277474	1.96813e+06	1.44647e+06	0	436767	4.64832e+06	156183	1.98305e+06	157316	608079	3.4433e+06	350775	235132	0	277502	0	1.03122e+07	1.32829e+06	5.77755e+06	875317	96421.9	519650	1.51045e+06	147161	0	2.93755e+06	144220	0	1.08133e+06	1.07123e+06	106154	145616	486748	627784	905471	6.19083e+06	2.39211e+06	319893	303918	0	0	649382	120844	0	0
Q6NUN0	Acyl-coenzyme A synthetase ACSM5, mitochondrial	ACSM5	4.53e-05	3.30245e+06	6.61184e+06	3.64181e+06	8.53756e+06	3.91344e+06	820932	1.85201e+07	2.06845e+07	1.10445e+07	0	866215	2.16051e+06	9.48561e+06	2.99704e+06	3.79003e+06	5.43284e+06	1.93385e+06	9.3123e+06	1.61501e+07	7.07815e+06	775770	5.14457e+06	4.08571e+06	1.15123e+07	5.2191e+06	1.05876e+07	8.17769e+06	5.32811e+06	13351661	6.10919e+06	347951	533501	0	8.49238e+06	1.58327e+06	0	4.83033e+06	3.21485e+06	0	1.19991e+07	1.54371e+06	0	0	0	8.35987e+06	0
Q6NYC1	Bifunctional arginine demethylase and lysyl-hydroxylase JMJD6	JMJD6	0.000651132	1.05337e+06	315893	938161	98852	3.44381e+06	1.16632e+06	619686	1.77619e+06	646581	917880	1.91405e+06	1.65884e+06	280196	413989	0	999971	98400.5	0	295449	294628	1.82392e+06	1.79867e+06	5.62063e+06	163777	2.63952e+06	6.05205e+06	429722	1.3265e+06	1.40394e+06	1.54261e+06	2.87004e+06	601534	740856	0	167754	848444	3.13333e+06	3.29042e+06	3.7044e+06	6.3142e+06	1.8603e+06	4.99912e+06	4.02976e+06	955193	3.81741e+06	842060
Q6NYC8	Phostensin	PPP1R18	2.7e-07	153433	806964	494377	1.45722e+06	1.36811e+06	0	1.3732e+06	0	984781	350515	2.3167e+06	358781	344176	877703	222260	907706	1.08436e+06	512295	1.12933e+06	513614	645347	524482	535003	0	0	307097	1.01865e+06	0	0	1.07865e+06	1.39572e+06	821397	745857	1.48826e+06	902617	301653	0	808674	1.19807e+06	1.26362e+06	378141	669058	0	0	268749	0
Q6NZY4	Zinc finger CCHC domain-containing protein 8	ZCCHC8	1.83e-06	336287	778772	376474	710726	706682	313828	207383	547837	130148	396975	1.68128e+06	1.30019e+06	666237	1.5808e+06	614537	92909	802960	128542	113195	824553	0	370792	1.6205e+06	138343	1.36288e+06	998226	112251	0	76910.8	379473	1.08024e+06	304200	72543.2	1.75088e+06	1.173e+06	0	5.01999e+06	1.01329e+07	4.21471e+06	4.4406e+06	1.23659e+06	2.69937e+06	150921	186883	2.0219e+06	2.422e+06
Q6P1J9	Parafibromin	CDC73	0.207104	359982	601235	393973	0	639263	747035	458244	517852	431584	411494	3.79269e+06	1.51981e+06	754804	1.81701e+06	365776	395382	391602	390118	264359	285093	671946	2.72107e+07	538336	418747	913066	582066	275455	581550	409036	615490	910935	651796	160175	160033	1.23727e+06	89939.7	6.5698e+06	2.04465e+06	1.01029e+07	2.57071e+06	2.24268e+06	956158	938090	1.0556e+06	3.20482e+06	2.59862e+06
Q6P1L8	39S ribosomal protein L14, mitochondrial	MRPL14	0.00138422	817474	552487	4.96981e+06	0	3.58659e+06	1.49338e+07	0	1.32996e+06	1.67565e+06	2.02276e+06	1.78704e+06	5.48531e+06	2.00437e+06	1.0094e+06	808504	3.01424e+06	252007	5.57844e+06	0	0	2.49793e+06	4.18582e+06	5.05817e+06	476606	1.05312e+07	4.5364e+06	0	5.41572e+06	1.80577e+06	964601	3.50179e+06	4.69074e+06	2.3984e+06	295711	0	3.03107e+06	9.04998e+06	6.05643e+06	1.38784e+06	1.80013e+07	1.29375e+07	7.47129e+06	4.77918e+06	1.24927e+07	1.41574e+06	2.68654e+06
Q6P2C8	Mediator of RNA polymerase II transcription subunit 27	MED27	0.63793	0	0	0	0	0	0	181334	446476	4.12645e+07	116400	0	182413	0	203047	0	0	0	0	0	0	0	112549	343193	0	0	0	0	54275.9	0	0	460940	68773.8	0	0	0	0	166536	460110	216159	419441	401399	345351	0	0	235508	303954
Q6P4A8	Phospholipase B-like 1;Phospholipase B-like 1 chain A;Phospholipase B-like 1 chain B;Phospholipase B-like 1 chain C	PLBD1	0.000373325	0	889286	205204	720364	0	0	0	0	131587	6.70885e+06	574600	0	0	0	3.15865e+06	391809	1.21927e+06	0	0	6.98839e+06	344589	0	0	0	0	280626	0	457325	0	0	777229	2.03603e+06	1.3636e+06	807010	1.66044e+06	359040	0	0	1.20728e+07	0	0	0	0	0	130909	0
Q6P4E1	Protein CASC4	CASC4	0.0204407	87186	2.01945e+06	2.28486e+06	427572	0	74216.7	1.17732e+06	1.23528e+06	321443	2.60058e+06	5.13743e+06	5.78738e+06	939986	2.43476e+06	0	430628	3.92754e+06	383005	1.05959e+06	3.96179e+06	894458	1.22704e+06	887243	1.26898e+06	378126	1.80234e+06	307976	1.66373e+06	197237	838621	863813	1.03486e+06	1.84791e+06	425090	746954	4.95697e+06	728608	235574	2.31583e+06	142994	2.01765e+06	1.4165e+06	8.86651e+06	100808	486021	2.15778e+06
Q6P6C2	RNA demethylase ALKBH5	ALKBH5	0.000882717	0	0	0	0	0	0	0	0	0	541426	312146	0	303594	362481	0	0	482761	0	0	0	0	0	0	152119	581020	257984	293461	0	0	527725	0	0	0	0	0	0	284341	0	353337	0	587205	1.69432e+06	206635	0	0	296438
Q6P9B6	TLD domain-containing protein 1	TLDC1	0.00434642	0	0	1.83293e+06	997291	240927	0	293210	0	483601	0	4.04296e+06	0	161054	486577	0	2.64531e+06	0	0	336826	522313	0	280870	446540	0	906983	422106	0	0	0	0	1.76556e+06	60512.1	396414	262895	1.65469e+06	0	244399	0	0	0	0	0	0	0	446873	672028
Q6PCB0	von Willebrand factor A domain-containing protein 1	VWA1	1.99e-06	209110	2.52889e+06	2.04913e+06	0	784378	4.89796e+06	5.13466e+06	914044	364299	3.48551e+06	1.13504e+06	1.19795e+07	1.14252e+06	5.35484e+06	113748	2.79296e+06	0	6.51371e+06	0	1.20865e+07	3.93869e+06	255790	0	1.76417e+06	3.78146e+06	0	3.35691e+06	2.05919e+06	0	0	5.59406e+06	492009	191331	221395	3.11904e+06	2.02651e+06	206069	5.68509e+06	3.03264e+06	1.50352e+06	3.5494e+06	616241	1.24945e+06	616578	6.78738e+06	192472
Q6PCB7	Long-chain fatty acid transport protein 1	SLC27A1	0.00180339	52155.4	190013	144842	223733	40851.7	0	418334	253465	70892.8	157959	0	436378	709292	97042.6	100706	90984.1	230974	1.87493e+06	62092.8	0	0	204082	250515	733683	581699	0	255686	706509	93825.1	0	1.07686e+06	606010	105874	1.63026e+06	971329	172303	573701	0	0	30492	0	159967	794021	0	1.36112e+06	0
Q6PCE3	Glucose 1,6-bisphosphate synthase	PGM2L1	1.37e-10	0	531693	215071	439911	0	440959	89063.2	0	395204	0	435401	459015	251896	170128	0	104734	0	0	292548	92923.1	1.66608e+06	0	50654.4	425263	0	57125.6	0	68046.9	74167.8	494252	679286	0	770776	78749	242903	452690	0	354515	753994	78093.1	0	166136	0	0	261110	44880
Q6PD62	RNA polymerase-associated protein CTR9 homolog	CTR9	2.06e-05	286483	352083	671831	0	0	387499	367683	35793.5	289732	439889	622977	910229	471294	1.59898e+06	290408	47191.4	254020	79302.6	588637	887435	1.03766e+06	0	262274	33593	346454	279804	166476	160297	257471	251724	488212	392028	0	0	1.27802e+06	256856	1.22306e+06	1.3092e+06	1.14017e+06	1.28177e+06	273773	1.06253e+06	0	578597	881858	1.33315e+06
Q6PI78	Transmembrane protein 65	TMEM65	1.77e-05	0	418097	0	675558	0	504773	0	0	0	933816	116982	0	0	1.36807e+06	0	0	0	0	0	9.45262e+06	0	1.48502e+06	2.73715e+06	0	0	0	0	903129	0	0	1.31245e+06	1.10811e+06	414756	0	1.32629e+06	4.78447e+06	958012	0	5.32942e+06	2.3764e+06	1.97079e+06	4.83572e+06	0	2.9527e+06	0	524340
Q6PIU2	Neutral cholesterol ester hydrolase 1	NCEH1	0.00180522	3.37043e+06	1.05586e+07	3.98898e+06	5.50595e+06	1.63424e+06	260175	3.11263e+06	3.42415e+06	6.36801e+06	11480525	9.99156e+06	2.87162e+06	2.90396e+06	2.67827e+06	0	2.47919e+06	6.5997e+06	962604	3.7999e+06	1.65503e+07	424508	9.1933e+06	3.27724e+06	182679	1.2924e+06	4.29354e+06	1.69806e+06	377552	1.25222e+06	5.51976e+06	6.40262e+06	2.51893e+06	1.58676e+07	4.13806e+06	5.08542e+06	7.89284e+06	2.37931e+06	1.47709e+06	3.01086e+06	3.90331e+06	441078	1.50963e+06	567580	0	1.91954e+06	0
Q6PJG6	BRCA1-associated ATM activator 1	BRAT1	0.00515859	79857	373349	93546.8	0	0	239099	179295	47682	190784	524290	155799	0	0	0	258759	0	0	105151	0	54844.3	0	0	160484	0	84026.9	334292	0	0	41036.2	142050	39298.3	125670	0	0	0	0	0	318859	261295	160391	520314	44337.1	122436	232831	1.05558e+06	492462
Q6PJT7	Zinc finger CCCH domain-containing protein 14	ZC3H14	0.00013685	0	113589	126523	0	744321	961207	198482	0	753519	590452	1.24098e+06	266208	1.08115e+06	1.11711e+06	249236	244773	421057	1.01879e+06	0	0	1.30495e+06	0	101504	415593	434063	133129	333229	197956	73863.1	0	624825	786692	135810	68689.4	113256	1.53191e+06	2.09545e+06	1.15357e+06	1.81536e+06	1.48986e+06	2.61303e+06	1.74591e+06	837841	169410	2.30748e+06	72989.1
Q6ULP2	Aftiphilin	AFTPH	3.28e-05	197532	0	171797	149212	98669.7	0	222967	217277	313515	160064	471617	115981	273537	300459	224442	28632.3	328566	120258	190288	108473	171705	503705	151373	119632	405323	412414	326947	97708.8	0	0	73086.8	685184	97007.1	132768	552833	191855	900786	532097	808170	964904	387772	452981	124886	165469	690608	961715
Q6UWP2	Dehydrogenase/reductase SDR family member 11	DHRS11	0.00214353	0	1.81322e+06	4.74425e+06	1.04794e+06	210265	1.04434e+07	0	2.60978e+06	3.00516e+06	892480	3.49945e+06	5.80827e+06	1.68478e+06	1.9669e+06	2.24385e+06	3.70557e+06	3.70637e+06	3.64007e+06	1.23166e+06	1.61307e+06	1.4614e+06	0	951486	3.4625e+06	3.65713e+06	7.31632e+06	3.32969e+06	1.51611e+06	1.16622e+07	2.37341e+06	4.29707e+06	1.28712e+06	3.24403e+06	1.06185e+06	1.10469e+06	2.97182e+06	1.26852e+06	1.10792e+06	292503	9.10699e+06	8.72262e+06	4.00964e+06	4.71926e+06	451694	894374	2.472e+06
Q6UWY5	Olfactomedin-like protein 1	OLFML1	0.373961	0	248826	0	2.32886e+07	0	0	0	0	0	0	414132	0	0	617110	0	0	0	170786	172664	0	0	0	0	0	788153	0	64402.8	0	0	1.19501e+06	550227	0	0	171128	1.96777e+06	0	0	506286	0	0	0	0	0	0	38473.1	0
Q6UX04	Peptidyl-prolyl cis-trans isomerase CWC27 homolog	CWC27	0.000264867	268683	427346	0	0	907330	301970	601811	0	803793	0	141598	630015	186069	188747	0	0	0	0	0	350466	0	0	532977	0	484811	269047	0	342577	0	0	0	249021	0	0	104199	0	1.48509e+06	700759	1.21992e+06	0	948415	0	441010	0	1.03514e+06	907707
Q6UX71	Plexin domain-containing protein 2	PLXDC2	5.96e-06	1.36763e+06	151373	343337	253031	22115.8	0	169440	0	25164.4	1.05991e+06	1.219e+06	298766	0	934758	0	701275	0	0	115021	0	0	67995.1	0	730598	491168	0	361791	107941	0	763683	2.3697e+06	42126.8	327424	326310	1.22746e+06	389118	0	0	1.15491e+06	0	0	1.13756e+06	242905	0	622798	0
Q6UXH1	Cysteine-rich with EGF-like domain protein 2	CRELD2	7.4e-05	1.28663e+06	2.16168e+06	3.79842e+06	2.2512e+06	8.37397e+06	1.36112e+07	6.54997e+06	4.39955e+06	1.53613e+06	1.00293e+07	1.08526e+07	4.64774e+06	986054	2.15064e+07	856680	1.43554e+06	2.22065e+06	4.05934e+06	2.25486e+06	3.86024e+06	5.32892e+06	2.58833e+06	0	2.04512e+06	6.76428e+06	670328	2.97448e+06	6.56048e+06	442944	532715	914742	1.03557e+07	2.29802e+07	2.86553e+06	6.82832e+06	2.80783e+06	323535	3.41788e+06	3.35199e+06	1.89108e+06	9.55564e+06	7.97601e+06	1.95023e+07	2.57014e+06	926948	2.2133e+06
Q6VY07	Phosphofurin acidic cluster sorting protein 1	PACS1	8.75e-11	553231	805992	485908	0	561717	864481	592804	793953	609947	236068	684932	0	46099.3	1.27569e+06	0	699320	231346	73344.5	481845	288703	459216	1.00071e+06	131477	683342	1.01623e+06	266277	1.02637e+06	409878	114996	1.48971e+06	1.12561e+06	158701	3.14221e+06	472997	1.30835e+06	0	0	789731	2.17173e+06	1.27319e+06	95562.1	656317	0	75285.9	735344	723007
Q6YN16	Hydroxysteroid dehydrogenase-like protein 2	HSDL2	0.000200421	8.32056e+07	1.96172e+08	1.47516e+08	8.00531e+07	1.10375e+08	7.3193e+07	7.0767e+07	2.63524e+08	2.19749e+08	8.98998e+07	1.24746e+08	2.39508e+08	2.03957e+08	1.04598e+08	1.21117e+08	8.24207e+07	1.10984e+08	1.05993e+08	2.28205e+08	1.31348e+08	1.57701e+08	9.58452e+07	2.93991e+08	1.74754e+08	1.13699e+08	1.35326e+08	1.25028e+08	1.97023e+08	9.60649e+07	1.06475e+08	1.82406e+08	2.26634e+08	1.21404e+08	1.2872e+08	1.10239e+08	3.90377e+08	1.77215e+08	7.72529e+07	8.23864e+07	1.09738e+08	1.50359e+08	1.5683e+08	6.59134e+07	4.55271e+08	3.06812e+08	9.52654e+07
Q6ZNA5	Ferric-chelate reductase 1	FRRS1	4.8e-05	0	108283	0	0	0	581687	0	131270	18818	0	633445	0	0	311022	0	0	0	0	0	70830.7	0	0	336119	0	362544	0	0	0	0	0	103592	0	0	0	0	135052	581304	120090	586445	757998	290790	663318	81809.8	933588	79328.9	1.01991e+06
Q6ZNJ1	Neurobeachin-like protein 2	NBEAL2	0.446054	0	0	0	0	0	7162.96	0	0	89756.8	0	22878.3	0	0	0	0	0	343372	0	0	341633	0	0	0	22965.9	0	0	0	0	0	34047.9	55319.7	12863.9	0	0	0	618565	0	57207.7	15372.1	0	0	0	0	0	2.46185e+07	18417.5
Q6ZS17	Protein FAM65A	FAM65A	5.84e-06	0	0	33973.8	76364.4	0	0	0	0	50381.6	157017	72165.7	0	38124.8	79073.2	0	29869.7	148334	51539.2	0	0	0	0	0	0	0	0	0	0	0	0	41263	0	69716.1	625867	0	0	60936.5	0	0	0	0	48917.4	0	0	0	0
Q6ZS81	WD repeat- and FYVE domain-containing protein 4	WDFY4	0.353843	0	19065.5	0	0	0	132100	926273	0	0	0	0	0	446363	18224	0	0	0	0	987695	31576.3	131447	460805	189955	981702	3846.67	0	704732	0	0	0	8488.09	31447.4	655764	1.06931e+06	255814	37036.7	0	0	356670	0	0	0	0	0	0	786378
Q709F0	Acyl-CoA dehydrogenase family member 11	ACAD11	1.65e-07	2.01401e+07	4.14043e+07	1.35239e+07	2.70433e+07	2.56014e+07	3.35477e+07	9.2405e+06	4.00595e+07	2.50344e+07	1.91405e+07	2.50477e+07	1.58352e+07	1.06682e+07	1.08028e+06	2.44894e+07	7.70183e+06	1.24471e+07	4.2249e+06	2.83803e+07	5.54524e+07	2.04049e+07	1.01188e+07	1.11893e+08	3.69779e+07	3.39645e+07	2.94635e+07	1.60189e+07	3.15657e+07	3.36761e+07	1.73112e+07	2.25702e+07	7.57308e+06	7.86119e+06	1.28911e+07	6.66387e+06	5.18551e+07	2.19056e+07	1.46127e+07	2.76307e+06	2.67314e+06	1.04841e+07	1.19159e+07	5.01873e+06	2.16701e+07	7.23243e+06	2.02197e+06
Q70CQ3	Ubiquitin carboxyl-terminal hydrolase 30	USP30	0.104908	104257	0	0	45360	222980	0	0	0	0	169669	642741	212385	0	0	0	0	0	0	0	71618.1	225562	0	0	312828	86018.6	52412.7	199691	296193	19985.8	0	90635	585073	0	187343	0	615360	335275	616272	139778	543767	406616	0	0	217083	0	264265
Q70E73	Ras-associated and pleckstrin homology domains-containing protein 1	RAPH1	0.000159466	713665	1.37974e+06	378109	169845	2.0368e+06	1.39014e+06	3.08443e+06	2.01085e+06	2.29411e+06	1.01913e+06	1.62796e+07	1.96213e+06	1.00956e+06	3.41218e+06	1.51519e+06	2.11541e+06	6.29144e+06	2.4161e+06	2.57961e+06	378497	5.01724e+06	1.62271e+06	382933	2.08516e+06	2.97102e+06	3.51434e+06	1.8051e+06	552872	942807	1.31097e+06	3.73704e+06	3.22449e+06	548152	1.77347e+06	2.26636e+06	1.67667e+06	4.06435e+06	1.09309e+07	2.67838e+06	5.15093e+06	5.47063e+06	6.53185e+06	4.30821e+06	4.34656e+06	1.98041e+06	1.20705e+07
Q70J99	Protein unc-13 homolog D	UNC13D	0.143127	0	104831	72339.4	0	0	0	227284	69159.5	212358	0	0	0	0	66232.6	0	1.45927e+07	145793	0	187761	178179	0	0	0	0	0	311737	34231.4	98238.4	201448	149804	60956.8	0	0	0	372506	67131.2	259668	0	0	0	0	100510	0	0	45505.5	0
Q70UQ0	Inhibitor of nuclear factor kappa-B kinase-interacting protein	IKBIP	0.000234321	0	2.6159e+06	348775	1.18953e+06	372843	1.08484e+06	1.05069e+06	279068	4.02128e+06	2.78305e+06	5.20975e+06	1.75364e+06	490031	4.635e+06	591612	2.80655e+06	0	1.42738e+06	254366	838153	6.04072e+06	3.78633e+06	1.11602e+06	708574	2.03417e+06	1.84181e+06	1.39664e+06	1.66373e+06	0	1.2191e+06	7.73026e+06	5.95122e+06	739692	1.92677e+06	1.34471e+06	5.54682e+06	4.3708e+06	1.4929e+06	2.82553e+06	2.04489e+06	6.76822e+06	1.67219e+06	1.10029e+07	1.84771e+06	6.54635e+06	6.0678e+06
Q71RG4	Transmembrane and ubiquitin-like domain-containing protein 2	TMUB2	0.0111407	0	0	7.94998e+06	0	1.73357e+06	3.29223e+06	0	0	2.47153e+06	1.34289e+06	638499	1.84908e+06	3.74975e+06	0	1.41578e+06	0	380814	0	0	373599	744876	1.37323e+06	1.22813e+06	1.70812e+06	5.86674e+06	0	0	4.37455e+06	3.26518e+06	0	1.10455e+06	1.40005e+06	0	820078	0	0	1.88591e+06	0	1.23056e+06	3.67095e+06	2.17728e+06	1.46194e+06	761374	4.25905e+06	4.25976e+06	516944
Q76M96	Coiled-coil domain-containing protein 80	CCDC80	0.00780289	0	667429	357161	0	286766	492809	0	0	1.41016e+06	0	0	0	0	199112	376737	149630	495006	178391	377987	1.45863e+06	0	0	0	0	285279	0	506436	380185	232208	362085	142014	1.3136e+06	0	0	961964	0	271546	2.05323e+06	1.29375e+06	0	751956	935474	0	0	0	0
Q7KZ85	Transcription elongation factor SPT6	SUPT6H	2.03e-05	121065	583786	523243	295318	942391	1.21468e+06	848093	370399	733087	460572	1.95593e+06	1.58546e+06	805764	1.31241e+06	0	234372	357031	252971	53004.9	342147	513050	249810	1.07675e+06	173020	1.22009e+06	715912	290817	342023	523458	225025	525932	745837	315912	375439	511937	225587	1.3996e+06	2.75315e+06	1.3705e+06	3.54775e+06	899232	1.95224e+06	162512	639151	2.96923e+06	2.09747e+06
Q7KZI7	Serine/threonine-protein kinase MARK2	MARK2	1.18e-06	0	79270.2	57480.1	0	0	139568	109700	0	0	82349.8	507370	0	0	229213	0	1.30344e+06	215742	144132	0	314972	0	284558	0	0	0	59447.6	193477	264313	0	127816	308848	307351	0	0	475623	145935	0	248535	70019.8	495147	156492	623513	78950.8	0	188000	460671
Q7L3T8	Probable proline--tRNA ligase, mitochondrial	PARS2	0.00541368	198348	673262	1.61584e+06	930633	1.16528e+06	306507	1.10084e+06	5.0071e+06	663915	650933	2.52575e+06	3.10401e+06	2.31967e+06	634240	1.32621e+06	975410	0	495516	372254	6.83532e+06	524870	1.69214e+06	6.21507e+06	727603	3.12535e+06	733216	914711	3.10722e+06	0	1.37e+06	2.47627e+06	4.14209e+06	1.24839e+06	501761	76828.3	626449	3.95846e+06	1.55542e+06	2.29175e+06	1.04526e+06	1.18815e+06	1.73932e+06	218231	544845	1.96617e+06	954996
Q7L5N7	Lysophosphatidylcholine acyltransferase 2	LPCAT2	0.000300106	0	291777	460509	791547	82440.2	199859	132995	1.04165e+06	74257.2	75973.8	518209	941512	57986.9	622271	0	157193	757115	134116	0	939450	66818.6	0	103080	64039.3	3.5532e+06	75905.6	123610	297097	714620	185440	1.2792e+06	394905	998950	841884	287596	816298	0	45050.3	166875	232697	0	0	1.79865e+06	1.3136e+07	194606	0
Q7L5Y1	Mitochondrial enolase superfamily member 1	ENOSF1	0.00500398	1.09003e+07	2.36475e+06	9.64341e+06	4.41499e+06	4.03964e+07	1.405e+06	1.60184e+07	3.09652e+07	532366	1.77492e+07	9.50282e+06	2.20676e+07	3.23518e+07	3.4485e+06	1.85849e+07	4.967e+06	3.55769e+06	1.27408e+07	1.59957e+07	2.0119e+07	7.46454e+06	2.23958e+06	5.14975e+06	1.90645e+07	6.36496e+06	1.73391e+07	5.78907e+06	7.05074e+06	1.88991e+07	3.55382e+06	5.23447e+06	1.37126e+07	4.51827e+06	1.15085e+07	3.41065e+06	5.61478e+07	5.79035e+06	1.72176e+07	5.28521e+06	5.7031e+06	1.29567e+07	9.64143e+06	4.04107e+06	3.48354e+06	1.54432e+07	1.23819e+07
Q7L8L6	FAST kinase domain-containing protein 5	FASTKD5	0.00132653	0	0	240598	0	581916	241391	134100	0	439441	408068	274556	713217	237794	0	998096	0	204872	386231	470064	2.33281e+06	334226	570089	552999	0	1.61557e+06	2.40634e+06	105358	1.66081e+06	69943.4	95038.5	846865	2.14349e+06	21325.7	65917	0	772988	1.70884e+06	313115	483870	843714	1.39672e+06	726473	980831	815530	1.24213e+06	262228
Q7LBC6	Lysine-specific demethylase 3B	KDM3B	1.17e-06	0	48190.6	90617.6	0	0	181009	100748	106175	0	13019.5	598201	509525	0	126443	0	0	179122	0	0	1.02743e+06	150379	42942.5	152271	0	363938	212054	0	43372.7	0	0	717966	300155	319355	141516	265946	0	305018	584972	533422	287875	206879	52044.9	18660	0	770979	864393
Q7Z3C6	Autophagy-related protein 9A	ATG9A	0.00102409	108742	263127	311712	128438	401983	397805	85794	70805.8	78155.3	65257.1	106824	0	90709.1	197692	150303	0	239738	457592	122185	71095.2	166243	165975	62527.2	0	337547	210603	276308	175176	0	625477	443523	56947.2	0	0	252572	705579	387828	142323	269525	0	45829.1	3.43806e+06	1.65017e+06	3.0904e+06	203755	3.19916e+06
Q7Z4H3	HD domain-containing protein 2	HDDC2	3.32e-06	1.69743e+06	398568	5.01877e+06	831479	1.71045e+06	207862	1.18362e+06	2.16017e+06	2.38522e+06	0	346674	7.03522e+06	430531	1.1271e+06	359206	618848	655892	792018	982591	2.57801e+06	354824	2.13881e+06	537061	774154	888465	4.18116e+06	669032	215656	0	2.55647e+06	1.92974e+06	1.27787e+06	993578	630836	3.67781e+06	525188	2.34314e+06	3.04965e+06	2.98749e+06	924317	0	919582	600276	529931	4.27793e+06	2.80059e+06
Q7Z4H8	KDEL motif-containing protein 2	KDELC2	8.67e-05	675851	2.57933e+06	723813	2.20361e+06	1.13793e+06	0	1.80653e+06	534494	0	280465	2.27013e+06	190135	160052	1.45013e+06	838658	697531	256527	735604	631525	0	761817	875081	48893.4	732690	740180	3.86713e+06	285976	266731	200698	1.54064e+06	572047	1.31208e+06	0	3.01523e+06	1.45618e+06	3.25128e+06	700698	1.09854e+06	633321	3.38023e+06	22754.1	599281	80220.4	0	649952	477210
Q7Z4I7	LIM and senescent cell antigen-like-containing domain protein 2	LIMS2	0.0876498	799013	1.09693e+07	7.86073e+06	6.11282e+06	1.03898e+07	843299	4.98893e+06	5.49157e+06	8.04773e+06	6.86539e+06	1.40176e+06	4.24785e+06	3.7546e+06	4.24709e+06	2.20137e+06	4.65529e+06	2.52749e+06	3.31385e+06	6.68064e+06	495388	678291	2.53276e+06	2.61381e+06	2.16884e+06	4.10166e+06	5.01966e+06	5.16774e+06	2.44975e+06	1.16749e+06	9.22068e+06	2.08521e+06	2.47997e+06	0	7.41278e+06	4.56697e+06	907610	4.0202e+06	2.7124e+06	4.69193e+06	2.30954e+06	4.70591e+06	1.15601e+07	457730	1.52158e+06	3.03603e+06	1.4865e+06
Q7Z4W1	L-xylulose reductase	DCXR	8.76e-12	2868946652	1145614062	2824639618	1925301195	3438031406	2850434597	2516432520	2039027297	1158831843	474222521	7.9029e+08	1195856823	3173575582	1375622307	2028682722	3867805451	2128000359	2561600713	1637980879	9.32999e+08	2470965634	1980167629	2704260115	3057340776	1660679841	5.17444e+08	2209183111	1594466559	3598675530	8.21944e+08	2687932036	6.362e+08	2.36708e+08	2652183148	7.8415e+08	6.55352e+08	3178825379	3.55283e+08	8.74495e+08	3.24286e+08	1225819821	5.51795e+08	2743989436	2392463074	1471268658	3.86529e+08
Q7Z569	BRCA1-associated protein	BRAP	0.0110365	0	71033	129357	8358.26	27847.3	0	0	16183.4	33404.5	66018	164592	328450	0	29996.3	42420.5	0	35406.5	0	17154.2	0	0	0	0	0	524676	56594.1	0	0	0	43528.1	29013.4	298789	0	0	72821.3	0	28457.7	150127	75861.1	141910	107316	388805	0	181959	280735	503675
Q7Z5K2	Wings apart-like protein homolog	WAPAL	4.02e-06	137923	67800	168550	35336.2	47246	168956	191191	0	0	99250.6	699286	320259	594559	324833	0	3846.67	51942.9	180393	0	170306	82435.4	0	346588	0	96015.9	398648	68209.4	0	0	92230.2	340876	414962	0	182741	231976	53658.6	46551.4	174630	558283	1.56278e+06	1.17071e+06	614828	103863	412975	414189	1.02369e+06
Q7Z5R6	Amyloid beta A4 precursor protein-binding family B member 1-interacting protein	APBB1IP	0.0788364	0	1.64697e+06	1.62109e+06	954789	640810	0	1.8241e+06	1.48135e+06	7.00452e+06	4.10475e+06	1.03927e+07	422324	2.44289e+06	1.94444e+06	1.33544e+06	556715	4.30892e+06	2.88479e+06	3.91569e+06	2.37547e+06	2.97902e+06	2.49534e+06	147498	0	1.50104e+06	2.73061e+06	3.40802e+06	159397	0	2.83443e+06	2.29592e+06	1.02557e+07	4.81697e+06	1.70402e+06	1.16497e+06	3.23268e+06	396291	1.7647e+06	1.85491e+06	346744	0	3.65919e+06	1.02788e+06	0	773514	259832
Q7Z6E9	E3 ubiquitin-protein ligase RBBP6	RBBP6	0.0078104	207901	42002.4	120414	0	37995.4	44020.7	48259.9	34310.9	0	45856.8	118003	47416.9	0	45565.2	0	0	0	70050.2	0	33384.3	0	120617	0	0	0	148625	0	45311.9	27559.1	0	154881	110125	9286.07	0	0	684214	51098.6	208138	68188.5	82124.3	446657	116732	62482.6	0	41538	16636.9
Q7Z6I6	Rho GTPase-activating protein 30	ARHGAP30	9.15e-08	0	0	0	30932.1	0	0	0	0	18018.2	0	0	0	0	0	978704	0	0	0	0	121670	0	0	0	0	93054.3	0	0	0	0	0	99957.8	54837.7	0	35607.2	88994.4	89683	0	0	0	0	0	0	0	0	0	0
Q7Z7E8	Ubiquitin-conjugating enzyme E2 Q1	UBE2Q1	0.000159009	760749	219017	2.62457e+06	0	888893	553801	523722	1.51319e+06	0	504088	2.44968e+06	1.55105e+06	1.47784e+06	966149	0	280221	289618	0	0	259913	556531	1.75884e+06	222838	1.42228e+06	345597	3.30247e+06	89805.4	199513	2.16529e+06	282747	1.19637e+06	2.2385e+06	639022	162606	2.13984e+06	336683	399571	4.55634e+06	1.54722e+06	1.47864e+06	1.16179e+06	2.12535e+06	989824	284774	1.65213e+06	2.60776e+06
Q86TX2	Acyl-coenzyme A thioesterase 1	ACOT1	0.00110402	6.85242e+07	2.55031e+08	7.93488e+07	8.66619e+07	1.24798e+08	5.25403e+07	1.04207e+08	1.0425e+08	3.10275e+08	3.90016e+07	2.41907e+08	7.91414e+07	2.35832e+08	7.77367e+07	9.01874e+07	5.77246e+07	7.69383e+07	1.08411e+08	1.48852e+08	2.74198e+08	1.16736e+08	1.07054e+08	130168984	1.4136e+08	5.93892e+07	7.89748e+07	6.86925e+07	9.86121e+07	2.22679e+08	1.03546e+08	1.48049e+08	8.80492e+07	6.3528e+07	1.08136e+08	5.18878e+07	5.7808e+07	2.20011e+08	1.68606e+08	1.22076e+08	2.09501e+08	8.14665e+07	2.5263e+08	1.2026e+07	1.33596e+08	1.04299e+08	1.02141e+08
Q86UA1	Pre-mRNA-processing factor 39	PRPF39	0.00826277	114331	210954	0	0	277695	80243.6	72161.3	317348	146349	0	616949	245409	0	125147	0	0	103207	327042	196802	0	0	568447	81545.5	0	170167	475611	0	0	0	132311	335315	0	158879	78165.2	146376	114672	1.38237e+06	753052	223809	112186	1.24036e+06	340110	0	238761	3.87127e+06	523017
Q86UB9	Transmembrane protein 135	TMEM135	0.00539984	1.91692e+06	921354	1.65182e+06	1.42539e+06	3.57768e+06	5.46579e+06	1.14052e+06	3.90066e+06	1.79372e+06	1.2129e+06	4.93859e+06	9.5763e+06	5.41895e+06	1.82912e+06	1.74468e+06	4.82771e+06	2.73132e+06	1.49783e+06	1.57684e+06	1.23138e+07	998669	831990	2.79207e+06	2.68405e+06	6.49451e+06	1.03811e+06	3.61442e+06	1.20779e+07	170475	506438	1.77838e+06	7.59139e+06	424950	1.61538e+06	1.21915e+06	5.58971e+06	227055	353553	8.28069e+06	2.87805e+06	677916	1.57857e+06	3.03444e+06	6.11779e+06	1.83562e+06	0
Q86UU1	Pleckstrin homology-like domain family B member 1	PHLDB1	0.0196773	0	0	0	170539	773431	0	0	0	0	48654.6	55254.7	0	0	70224.2	0	71308.2	0	154270	0	0	460502	0	0	360295	134441	0	0	0	0	224036	112257	0	0	118172	66774.7	0	0	89198.1	0	0	0	0	0	0	0	0
Q86UX7	Fermitin family homolog 3	FERMT3	1.43e-12	4.37877e+06	2.26571e+07	1.16304e+07	9.30755e+06	2.31228e+06	2.83336e+06	2.68886e+06	4.24673e+06	1.61076e+07	6.68327e+06	6.07721e+06	1.77932e+06	2.48706e+06	1.16101e+07	1.05198e+06	2.60809e+06	1.29646e+07	2.56238e+06	9.4104e+06	1.29726e+07	2.44891e+06	1.90176e+06	4.49835e+06	2.80105e+06	6.638e+06	3.03921e+06	7.40668e+06	1.58301e+06	953678	1.55098e+07	1.33184e+07	8.58692e+06	1.11812e+07	8.45879e+06	1.32798e+07	8.38238e+06	473307	6.72639e+06	8.90789e+06	3.05833e+06	1.27081e+06	84402.4	2.78496e+06	51212.5	6.32805e+06	968892
Q86V21	Acetoacetyl-CoA synthetase	AACS	3.55e-06	191859	0	0	200631	129448	99482.8	0	0	0	167065	125331	0	0	114896	338316	0	0	0	0	102335	483326	0	0	0	179334	186818	0	357717	0	161339	649124	140623	164846	0	435813	201241	0	801500	117186	0	0	161180	167939	147777	164696	110129
Q86VB7	Scavenger receptor cysteine-rich type 1 protein M130;Soluble CD163	CD163	2.24e-07	2.77912e+06	2.75832e+07	1.26268e+07	2.19485e+07	2.78591e+06	6.25377e+06	1.44387e+07	8.85755e+06	3.96517e+07	1.74385e+07	2.24269e+07	2.42847e+06	7.1102e+06	1.30928e+07	1.4644e+06	7.45774e+06	2.94974e+07	3.27607e+06	2.773e+07	9.14166e+06	8.53462e+06	2.35244e+06	7.13412e+06	4.66646e+06	7.52833e+06	7.05981e+06	7.68498e+06	791255	2.14749e+06	2.30155e+07	1.65029e+07	6.47191e+06	1.11177e+07	1.70343e+07	1.61886e+07	5.53011e+06	61970.8	1.28618e+07	1.09526e+07	3.63141e+06	0	0	4.79855e+06	0	9.05918e+06	61645.8
Q86VD7	Mitochondrial coenzyme A transporter SLC25A42	SLC25A42	0.0102631	472503	133513	3.6751e+06	1.34295e+06	1.62507e+07	0	1.62635e+07	1.60063e+06	3.86512e+06	1.0204e+06	1.26905e+06	124761	2.94025e+07	0	329496	2.76187e+06	1.73418e+07	1.69705e+06	1.64405e+06	318239	1.25174e+06	0	6.20854e+06	1.97571e+06	667480	595514	8.39449e+06	769834	1.80818e+06	2.12003e+06	4.42e+06	1.18745e+06	232589	4.34661e+06	461584	370779	810500	1.82184e+06	258279	4.29237e+06	760127	657866	0	1.51805e+06	3.30183e+06	152439
Q86W42	THO complex subunit 6 homolog	THOC6	0.000191324	167240	0	0	0	2.85885e+06	1.20475e+06	170101	114992	490557	1.515e+06	191930	0	2.24899e+06	1.32735e+06	124281	1.92981e+06	0	1.71719e+06	534582	1.15145e+06	1.01806e+06	237077	858753	596164	669047	0	1.1049e+06	1.13184e+06	91355	0	1.33824e+06	1.01672e+06	0	152729	207313	1.32428e+06	4.18883e+06	2.79526e+06	2.76029e+06	2.43282e+06	1.10054e+07	614122	5.24877e+06	0	0	282375
Q86WA6	Valacyclovir hydrolase	BPHL	0.000232559	2.78847e+07	6.60872e+07	2.69241e+07	2.66174e+07	5.3194e+07	1.92689e+07	2.79018e+07	5.72444e+07	9.45433e+07	1.78436e+07	7.2181e+07	4.26268e+07	2.78072e+07	4.9828e+07	4.31584e+07	3.15736e+07	1.64249e+07	1.24909e+08	3.83902e+07	4.05897e+07	6.29585e+07	6.40699e+07	3.31791e+07	3.07676e+07	9.50994e+07	3.61046e+07	6.21345e+07	4.46603e+07	4.36961e+07	2.92889e+07	5.55844e+07	3.75049e+07	4.08416e+06	4.50138e+07	2.98459e+07	3.76538e+07	6.78832e+07	1.95919e+07	4.26238e+07	7.95311e+07	1.174e+08	4.59405e+07	1.11009e+07	1.25409e+08	2.72452e+07	3.16604e+07
Q86WA8	Lon protease homolog 2, peroxisomal	LONP2	0.000133616	0	2.50359e+06	813395	555935	825978	645464	2.09673e+06	1.28928e+06	1.0976e+06	1.15696e+06	2.39203e+06	2.74346e+06	3.9808e+06	929424	1.24523e+06	246408	835438	1.0239e+06	2.32243e+06	1.21137e+06	137818	1.19469e+06	1.0666e+06	1.41335e+06	905053	516942	3.53407e+06	1.47202e+06	1.42126e+06	1.01714e+06	1.26595e+06	2.32139e+06	943139	920782	622360	1.28933e+06	2.23358e+06	2.76172e+06	399196	1.87323e+06	1.74086e+06	995071	669091	1.3872e+06	2.82806e+06	1.14407e+06
Q86WB0	Nuclear-interacting partner of ALK	ZC3HC1	0.000162274	271552	196662	718383	0	1.721e+06	948711	759966	0	349769	1.08119e+06	993946	1.22825e+06	984203	342183	253435	124511	473248	870563	381406	0	0	1.04663e+06	509383	490531	1.8725e+06	360502	239927	0	772170	517532	687086	1.15675e+06	369294	438424	616327	183168	436851	531512	1.40942e+06	1.3893e+06	854937	1.35833e+06	99215.6	1.20684e+06	478401	1.49319e+06
Q86WJ1	Chromodomain-helicase-DNA-binding protein 1-like	CHD1L	0.00114386	119569	258221	655667	41883.4	0	293159	313031	0	500837	388673	539937	60899.1	0	1.20082e+06	0	0	283018	0	0	1.03497e+06	0	387832	294118	254630	0	0	400545	15021	0	0	276393	95267.7	578345	0	193395	35361.3	1.76115e+06	798833	1.79427e+06	1.59464e+06	76200.2	1.82251e+06	293754	1.23168e+06	1.16803e+06	246000
Q86WU2	Probable D-lactate dehydrogenase, mitochondrial	LDHD	5.83e-11	1.99727e+06	4.02383e+07	4.89251e+07	6.29729e+07	3.1525e+07	2.32981e+07	5.56339e+07	7.08909e+07	2.66649e+07	2.55652e+07	3.53018e+07	1.14047e+07	3.876e+07	2.7593e+07	8.35868e+07	27033673	6.60567e+07	6.30831e+07	6.84744e+07	6.88644e+07	3.99162e+07	2.44795e+07	9.13253e+07	4.57238e+07	4.3953e+07	2.95955e+07	1.44794e+07	7.583e+07	7.64974e+07	1.83856e+07	4.65292e+07	3.19146e+07	5.51789e+07	5.54481e+07	1.43434e+07	2.66635e+07	3.35235e+07	7.63035e+06	1.41304e+07	6.79217e+06	2.82267e+07	9.6897e+06	4.24922e+06	5.31698e+06	5.48527e+07	8.34735e+06
Q86WV6	Stimulator of interferon genes protein	TMEM173	0.00989733	0	550383	1.84914e+06	1.06735e+06	0	0	402830	1.33817e+07	3.98384e+06	691102	1.958e+06	1.48548e+07	4.10978e+07	1.04881e+07	0	5.4007e+06	0	203444	1.07441e+06	496715	963150	0	1.11092e+06	0	1.37187e+06	5.07519e+06	3.03515e+07	743861	0	1.91703e+06	3.27179e+06	559782	5.87865e+07	2.02979e+06	660285	259433	0	560663	2.05944e+07	0	140277	384559	519309	0	1.18126e+06	0
Q86X83	COMM domain-containing protein 2	COMMD2	0.043814	3.80093e+06	1.29546e+06	2.92544e+06	989484	984303	2.90354e+06	1.1142e+06	0	1.26822e+06	5.88186e+06	1.75292e+07	5.75075e+06	2.00189e+06	1.00722e+06	0	659536	6.12803e+06	6.56099e+06	823968	946775	4.16998e+06	5.42353e+06	1.07183e+06	5.06146e+06	1.61307e+06	1.67581e+06	3.97208e+06	2.8767e+06	657595	5.26798e+06	3.44121e+06	3.82898e+06	2.50419e+06	6.76292e+06	3.20777e+06	55805.3	1.89214e+06	5.13895e+06	3.26552e+06	1.08416e+07	6.26646e+06	4.33189e+06	5.41783e+06	7.61207e+06	1.08589e+07	5.0134e+06
Q86XE5	4-hydroxy-2-oxoglutarate aldolase, mitochondrial	HOGA1	1.96e-05	1.25653e+07	1.31176e+07	1.79326e+07	2.4673e+07	5.39644e+06	0	2.66742e+06	5.85559e+06	0	4.35505e+06	212166	136709	938240	165999	3.03599e+07	4.74025e+06	8.11608e+06	137590	8.28805e+06	2.35749e+07	1.15236e+06	0	3.30067e+07	5.18377e+06	0	7.30758e+06	0	1.23554e+07	1.74589e+07	1.27664e+07	4.17329e+06	0	0	3.09082e+07	707291	2.36694e+07	0	0	210554	0	0	356779	0	2.042e+06	240804	0
Q86XZ4	Spermatogenesis-associated serine-rich protein 2	SPATS2	0.394652	428024	0	111763	0	0	192410	0	0	0	0	83447.6	0	187750	0	0	0	0	0	0	0	0	0	0	0	0	486883	0	1.85294e+07	0	0	311365	1.1269e+07	0	0	0	264976	4.1101e+07	375509	360303	513746	234715	673728	0	55260.6	0	279544
Q86YB7	Enoyl-CoA hydratase domain-containing protein 2, mitochondrial	ECHDC2	4.37e-07	4.19457e+07	9.01134e+07	5.60421e+07	2.25355e+08	1.27594e+08	2.61327e+07	1.22048e+08	1.03461e+08	3.82996e+07	1.15971e+08	4.39226e+07	6.45757e+07	2.00248e+07	2.40536e+07	8.9247e+07	3.65349e+07	113632238	3.03098e+07	1.00681e+08	7.6452e+07	6.25242e+07	4.61535e+07	1.24512e+08	1.11696e+08	4.65837e+07	2.07457e+07	3.88621e+07	4.56148e+07	7.59031e+07	3.12172e+07	6.5256e+07	8.19886e+07	9.64963e+07	2.26569e+08	5.44742e+07	1.89879e+07	2.27431e+07	8.84445e+07	1.71677e+07	2.23829e+07	6.04652e+07	4.7717e+07	5.26211e+06	3.44786e+07	8.29412e+07	1.13396e+07
Q86YV0	RAS protein activator like-3	RASAL3	8.7e-06	0	189405	140100	0	0	0	37597.1	43898.8	174442	55775.3	46332.9	27748.6	3.89633e+06	258280	0	0	80533	0	23124.5	149339	0	1.28435e+06	0	689083	154543	0	40295.9	37250.5	0	46524.8	220392	68031.8	0	1.28345e+06	184823	0	0	0	91504.1	0	0	0	0	0	59924	0
Q86YV9	Hermansky-Pudlak syndrome 6 protein	HPS6	1.59e-07	0	0	48768.1	0	0	159958	0	0	0	0	0	0	0	58643.3	0	64585.9	0	0	0	0	0	60813	77608.8	0	0	0	54721.7	0	0	45115.3	98514.9	0	0	0	76354.2	0	0	20992.9	95323.9	556307	300076	173982	119565	62223.9	0	393202
Q8IU81	Interferon regulatory factor 2-binding protein 1	IRF2BP1	0.00053928	0	119105	139482	118833	179475	0	0	0	0	0	274949	243435	166122	153935	0	0	225590	447341	0	405584	0	438189	0	0	65880.3	115860	80005.9	63621.5	0	601146	212343	296577	53023.3	0	291754	0	242140	1.14863e+06	0	1.14723e+06	3.61573e+06	765016	644048	1.19523e+06	336110	2.756e+06
Q8IUF8	Bifunctional lysine-specific demethylase and histidyl-hydroxylase MINA	MINA	0.0528477	0	0	0	0	458300	0	804573	0	0	1.82635e+06	95012.3	421750	0	96797	0	0	0	0	0	394911	195084	0	6.69471e+06	0	0	0	357212	358207	0	265517	1.95179e+06	774443	0	0	0	0	2.51188e+06	664868	6.39159e+06	1.09695e+06	4.78057e+06	548781	224060	682572	0	363145
Q8IUI8	Cytokine receptor-like factor 3	CRLF3	5.72e-10	730770	1.52666e+06	166316	1.90692e+06	0	344519	1.43219e+06	1.00913e+06	648267	669605	2.09197e+06	1.70456e+06	0	1.93369e+06	0	0	1.10711e+06	0	1.29796e+06	2.95189e+06	126928	139497	0	0	1.86612e+06	0	572261	392468	426150	1.03793e+06	2.91122e+06	1.27272e+06	153064	0	1.87418e+06	1.76923e+06	224010	537115	1.31891e+06	0	0	1.16975e+06	1.34023e+06	519377	5.07154e+06	136063
Q8IUX7	Adipocyte enhancer-binding protein 1	AEBP1	3.67e-08	0	1.42417e+06	5.77393e+06	6.77598e+06	556224	289283	38156.5	510425	83034.2	59206.2	1.31521e+06	184830	41222.9	6.37072e+06	85124.8	912740	170246	3.3208e+06	461174	478103	0	1.02487e+06	0	0	7.23161e+06	498687	556412	839272	110679	6.57784e+06	8.87435e+06	0	475698	1.93852e+06	5.16127e+06	0	0	1.04827e+06	0	0	40466.4	0	0	0	341350	0
Q8IUZ5	5-phosphohydroxy-L-lysine phospho-lyase	PHYKPL	4.22e-08	1.87731e+06	5.25294e+06	1.22768e+06	8.39807e+06	4.67802e+06	2.06802e+06	1.58958e+06	840555	437072	9.5921e+06	1.48322e+06	3.48598e+06	566286	2.49242e+06	3.12392e+06	5.68945e+06	1.67773e+07	1.06133e+07	7.25875e+06	2.42741e+06	7.85244e+06	629074	3.48686e+06	4.10128e+06	1.23483e+06	5.46658e+06	9.33734e+06	6.83719e+06	4.2222e+06	3.78555e+06	1.82522e+06	532786	1.63478e+06	6.79667e+06	3.19401e+06	1.20589e+06	1.18479e+06	496994	267381	544547	720520	121116	0	392518	542418	643792
Q8IV04	Carabin	TBC1D10C	1.18e-06	0	0	0	198655	447015	0	0	0	0	0	0	0	0	227765	0	0	746045	0	0	111953	101135	0	0	0	0	0	260693	148071	0	0	0	0	139426	0	1.23985e+06	71163.1	0	0	0	0	0	0	0	0	0	1.43478e+06
Q8IV36	Protein HID1	HID1	0.000555756	0	0	0	75219.7	0	11385	0	0	0	0	248005	0	0	0	0	16300.6	0	9599.56	0	0	202651	0	0	0	0	0	0	991778	0	187224	0	0	0	0	86422.1	178424	0	69378.4	350529	0	0	0	171752	0	216611	0
Q8IVH4	Methylmalonic aciduria type A protein, mitochondrial	MMAA	0.00651746	1.572e+06	1.88473e+06	1.59018e+07	3.90051e+06	1.19927e+07	6.84687e+06	8.00428e+06	1.99715e+07	4.20301e+06	4.26734e+07	8.13865e+06	2.95775e+07	3.21876e+06	9.31729e+06	5.82995e+06	9.74867e+06	4.63441e+06	8.84153e+06	1.37664e+07	9.87327e+06	1.3547e+07	4.60015e+06	3.86735e+07	4.77356e+06	15565331	1.32375e+07	9.38637e+06	6.70642e+06	3.6533e+06	4.31238e+06	8.83434e+06	3.64574e+07	1.26526e+07	1.24453e+07	1.20506e+07	1.28249e+07	4.21703e+06	1.04934e+06	5.02875e+06	4.53391e+06	1.05701e+07	1.74774e+06	7.34243e+06	3.27774e+06	1.51853e+07	3.6354e+06
Q8IVS8	Glycerate kinase	GLYCTK	0.001632	2.45052e+06	3.93829e+07	5.84535e+06	3.53079e+07	8.4907e+07	2.34342e+06	1.14338e+08	4.65884e+06	4.00191e+06	1.83405e+07	2.09978e+07	3.87918e+06	2.25903e+07	4.68623e+06	4.67106e+07	1.56969e+07	2.68607e+07	1.06274e+07	3.69749e+07	1.38097e+07	2.89911e+07	2.72544e+07	7.74043e+07	1.02704e+07	6.49911e+07	8.58442e+07	1.90334e+07	2.29973e+07	3.46495e+07	3.4907e+07	1.0481e+07	3.43949e+07	1.12369e+06	6.25921e+07	1.50456e+07	1.56375e+07	9.22034e+07	3.34254e+06	3.20181e+06	1.59574e+07	4.09672e+07	2.92707e+06	3.43591e+06	1.95465e+07	9.50012e+07	4.0085e+06
Q8IWJ2	GRIP and coiled-coil domain-containing protein 2	GCC2	1.25e-05	0	130423	114005	0	105678	45373.1	88797.6	72176.3	121950	215871	353684	599541	0	245112	0	205707	54799.6	173010	51247.6	58466	147819	500313	380347	0	196452	160812	31298.8	126719	0	102233	205977	123180	41028.5	0	405591	114955	177048	137888	1.96475e+06	128186	347453	264275	824846	0	409280	444844
Q8IWS0	PHD finger protein 6	PHF6	0.0104105	139631	366983	818426	0	477168	298798	73740.8	0	141874	0	197408	0	325933	718928	0	0	0	0	107707	4.06011e+06	301137	382749	400834	301412	477817	116556	213911	563488	0	0	317521	0	457125	0	71566.2	0	897471	327362	137007	1.62762e+06	2.29618e+06	31921.8	479238	864981	266547	244457
Q8IWW8	Hydroxyacid-oxoacid transhydrogenase, mitochondrial	ADHFE1	0.000336659	3.50049e+06	1.15837e+07	8.62549e+06	2.7901e+07	1.06211e+07	1.0508e+07	2.553e+07	8.79885e+06	6.16655e+06	3.65866e+07	1.55975e+07	2.61008e+07	9.75577e+06	3.23507e+06	1.62778e+07	4.80366e+06	7.26109e+06	4.60955e+06	9.12467e+06	1.67253e+07	2.86104e+06	825666	6.69607e+07	1.90004e+07	4.15972e+07	1.58069e+07	2.46758e+06	1.55843e+07	1.23564e+07	3.3905e+07	1.33012e+07	1.42445e+07	3.0095e+07	4.5101e+07	1.21335e+07	1.04552e+07	1.95817e+06	5.40207e+06	1.08047e+07	6.14231e+06	3.92445e+06	8.59492e+06	446031	9.08089e+06	3.73266e+07	2.48331e+06
Q8IWX8	Calcium homeostasis endoplasmic reticulum protein	CHERP	1.22e-08	2.10632e+06	192112	343853	438559	1.32305e+06	1.17446e+06	1.48899e+06	115862	502149	703743	2.31894e+06	635311	2.48113e+06	1.0974e+06	629107	981421	396573	1.11986e+06	124353	810181	1.66223e+06	1.39704e+06	2.58172e+06	632136	1.35987e+06	1.44592e+06	958377	1.04716e+06	244619	1.44114e+06	1.18661e+06	596833	89426.1	985534	979242	0	4.01037e+06	1.97893e+06	3.42658e+06	5.58524e+06	3.84014e+06	733383	1.95416e+06	852192	1.73734e+06	2.97304e+06
Q8IXB1	DnaJ homolog subfamily C member 10	DNAJC10	0.000228322	630627	812713	3.83192e+06	337658	326617	445567	105274	945678	682148	2.98235e+06	963570	1.02428e+06	927038	1.97085e+06	0	266258	388924	222648	290640	870214	1.37199e+06	1.84639e+06	2.98757e+06	562857	690338	782598	1.18427e+06	351818	0	1.14009e+06	1.10097e+06	737509	4.93852e+06	393271	1.55321e+06	1.62611e+06	253726	84821.8	990476	1.87098e+06	57458.9	3.16281e+06	2.36648e+06	596287	0	326172
Q8IXM2	Chromatin complexes subunit BAP18	BAP18	0.000135935	0	1.9184e+06	1.46514e+06	3.82371e+06	0	4.14662e+07	845895	1.19204e+07	1.11315e+06	9.48987e+06	1.59544e+06	0	0	2.86016e+07	1.16074e+06	8.50649e+06	1.25194e+06	2.71536e+06	398686	539788	2.8942e+06	0	1.22961e+06	1.79587e+06	2.95836e+06	908554	5.08888e+06	725786	396230	0	3.45489e+06	2.99028e+06	7.29881e+06	7.57115e+06	2.02384e+07	0	0	619197	2.98816e+07	5.48934e+06	1.04222e+06	3.12765e+06	9.29957e+06	4.11289e+06	2.26643e+06	5.5627e+07
Q8IXS6	Paralemmin-2	PALM2	0.000551901	389338	2.62361e+06	2.76026e+06	5.17133e+06	4.15771e+06	1.50928e+06	5.02036e+06	2.2936e+06	3.15498e+06	2.8278e+06	698505	841943	2.46943e+06	2.13345e+06	2.01746e+06	1.41735e+06	5.92081e+06	1.95403e+06	2.44621e+06	0	3.88177e+06	953588	1.91534e+06	3.77588e+06	921299	295403	3.47376e+06	2.58393e+06	2.57015e+06	3.61231e+06	2.94248e+06	5.47174e+06	3.57905e+06	5.63847e+06	645271	314326	1.14651e+06	215012	0	0	1.2553e+06	5.10885e+06	630746	0	2.0364e+06	1.22678e+06
Q8IY33	MICAL-like protein 2	MICALL2	5.36e-05	36678.9	357299	346803	405838	345627	201322	71099.6	38120	219849	0	202536	0	0	0	10946.4	108293	168312	377820	70959	35177.3	0	15550	49153.7	0	341406	102520	62616.9	153379	0	52464.2	336201	0	371542	724176	34883.3	0	0	89916.7	70940.6	47259	0	144700	0	18980	0	137786
Q8IY67	Ribonucleoprotein PTB-binding 1	RAVER1	3.41e-07	0	0	1.33862e+06	353677	311489	0	0	274435	336530	0	1.67964e+06	642297	316299	705465	0	0	0	291148	833786	0	716450	667001	381404	180131	1.11059e+06	1.21945e+06	465506	39230.5	0	194496	383995	188364	96711	402349	323966	583013	504328	595875	1.16407e+06	109490	324484	117247	292304	206794	6.63835e+06	945009
Q8IYB5	Stromal membrane-associated protein 1	SMAP1	3.96e-05	0	0	970108	662556	0	1.14831e+06	3.03047e+06	668894	2.25762e+06	0	2.87414e+06	2.89419e+06	0	0	0	3.10219e+06	1.04399e+06	2.91926e+06	659360	0	2.24831e+06	5.60562e+06	1.19873e+06	0	0	2.31922e+06	0	3.55942e+06	0	4.51242e+06	2.61576e+06	584364	0	633176	0	6.76205e+06	6.55341e+06	4.13415e+06	3.46115e+06	4.77285e+06	4.07294e+06	4.27175e+06	2.69519e+06	2.9843e+06	1.48308e+06	6.67823e+06
Q8IYM9	E3 ubiquitin-protein ligase TRIM22	TRIM22	0.189644	651577	1.15073e+06	2.09357e+06	297398	2.8094e+06	210702	5.6877e+06	1.43851e+06	1.06425e+06	3.68608e+06	2.94446e+06	6.57418e+06	2.07334e+06	5.95411e+06	1.08498e+06	1.50144e+06	2.9671e+06	667260	1.38359e+06	0	3.21687e+06	99717.8	1.0418e+06	0	440259	4.10311e+06	916919	0	0	316488	2.7026e+06	0	172416	2.09343e+06	1.66408e+06	912052	0	2.06925e+06	903491	1.51506e+06	0	0	0	0	1.36295e+07	0
Q8IYQ7	Threonine synthase-like 1	THNSL1	0.00836515	5.64058e+06	1.149e+07	1.24856e+07	1.2426e+07	1.16003e+07	3.89878e+06	8.98743e+06	1.51196e+07	2.23405e+07	2.52921e+06	1.02392e+07	1.87538e+07	1.43714e+07	3.82023e+06	1.2591e+07	4.97563e+06	1.39733e+07	4.93016e+06	1.28532e+07	1.73673e+07	1.72421e+07	1.02149e+07	1.69489e+07	1.46605e+07	1.25601e+07	1.78143e+07	1.52799e+07	1.42034e+07	1.4448e+07	5.17661e+06	1.64426e+07	8.2082e+06	8.79469e+06	1.74646e+07	9.74979e+06	3.86319e+06	8.87788e+06	6.30933e+06	3.96942e+06	2.3154e+07	1.35962e+08	8.5045e+06	3.71237e+06	1.73165e+07	2.45822e+07	6.35949e+06
Q8IYS1	Peptidase M20 domain-containing protein 2	PM20D2	0.00139429	0	0	0	0	156302	0	0	0	187394	429045	636268	0	0	0	0	509251	0	1.23779e+06	0	0	0	494602	179996	0	0	3.17034e+06	0	0	0	0	0	703313	0	0	1.03913e+06	1.28637e+06	6.37786e+06	1.01459e+07	118733	1.81522e+07	1.30762e+06	597754	3.97308e+06	0	0	1.612e+07
Q8IYU8	Calcium uptake protein 2, mitochondrial	MICU2	6.74e-05	345871	1.53511e+06	0	0	0	622203	0	0	454039	0	490735	496148	0	376990	0	2.37461e+06	87937.1	0	0	1.08325e+06	781001	0	754527	0	167207	1.04321e+06	0	0	0	0	220763	0	453825	0	1.34926e+06	1.77125e+06	0	338194	1.70531e+06	2.91885e+06	0	232313	623838	2.73156e+06	0	967735
Q8IZ73	RNA pseudouridylate synthase domain-containing protein 2	RPUSD2	0.000589407	0	72822.8	0	0	135276	269541	840412	283722	0	0	307368	1.23687e+06	87557.6	0	0	108577	612694	189184	0	254780	0	480500	1.24921e+06	0	438506	841236	0	0	0	0	0	654226	0	0	0	0	570513	957047	328333	833143	179306	460365	0	237984	1.29284e+06	64413
Q8IZL8	Proline-, glutamic acid- and leucine-rich protein 1	PELP1	1.91e-06	0	0	17260.4	121475	1.15979e+06	111285	667013	108728	661319	523596	146799	134747	1.16671e+06	452705	110157	192761	42960.5	174631	15445	71358.8	77323.5	0	2.62593e+06	54504.8	1.16333e+06	0	1.35286e+06	122393	0	177049	356399	858681	130836	842997	441181	381388	373838	2.59277e+06	1.45494e+06	1.27744e+06	2.3507e+06	145258	396553	138786	2.44653e+06	1.06824e+06
Q8N0X4	Citrate lyase subunit beta-like protein, mitochondrial	CLYBL	0.000886618	1.25849e+07	4.99889e+07	5.81856e+07	4.36602e+07	1.3194e+08	3.12535e+07	4.84137e+07	5.81606e+07	3.78302e+07	9.81391e+07	1.04641e+07	7.06678e+07	1.29613e+07	3.81366e+07	2.41724e+07	4.89045e+07	4.15959e+07	1.38956e+07	6.60735e+07	1.10325e+08	3.80556e+07	2.41139e+07	1.27329e+08	2.07062e+07	4.32773e+07	9.67082e+07	7.0199e+07	7.42318e+07	4.74058e+07	3.56439e+07	2.41481e+07	2.50398e+07	9.33544e+07	4.44119e+07	7.09322e+07	2.8823e+07	8.61367e+07	1.85072e+07	3.40415e+07	3.87613e+07	1.1107e+07	4.80657e+07	1.37895e+07	3.08225e+07	8.06564e+07	1.16688e+07
Q8N0X7	Spartin	SPG20	0.00930062	0	0	0	0	0	0	65211.7	0	0	93091.5	0	0	63211.9	93699.1	0	0	0	91518.8	96603.3	131542	0	0	0	0	0	0	0	0	73241.4	859734	135298	0	0	146090	380135	0	0	0	0	0	0	0	0	0	0	0
Q8N139	ATP-binding cassette sub-family A member 6	ABCA6	1.55e-05	6.51108e+06	5.84639e+06	5.66205e+06	3.58589e+06	2.95157e+07	3.06309e+06	3.49868e+07	8.7655e+06	1.99068e+06	8.18349e+06	3.29355e+06	1.13309e+07	1.13153e+07	5.25447e+06	9.79956e+06	1.00755e+07	7.42272e+06	4.87425e+06	6.78311e+06	9.82001e+06	9.93268e+06	5.49042e+06	3.43379e+07	3.30881e+06	1.55453e+07	1.55666e+07	6.72051e+06	3.63325e+07	7.04379e+06	3.40177e+06	6.99048e+06	3.06534e+06	3.35589e+06	8.31886e+06	5.25038e+06	8.74476e+06	1.92212e+07	1.19262e+07	1.23188e+07	2.44407e+06	4.51042e+06	5.2514e+06	1.73016e+07	1.62229e+07	1.26441e+07	8.09014e+06
Q8N2S1	Latent-transforming growth factor beta-binding protein 4	LTBP4	0.0119072	0	797190	204512	909155	98951.8	82220.4	21690.9	42499.1	359645	0	1.61075e+06	0	80756.9	909472	0	502349	0	3.26862e+06	98026	161149	0	0	0	31324.4	1.1763e+06	0	751148	0	0	70877.3	772339	0	0	74703.9	747783	0	0	877339	0	0	59405.3	0	0	0	368862	0
Q8N335	Glycerol-3-phosphate dehydrogenase 1-like protein	GPD1L	2.64e-06	47213.6	638856	411646	2.55051e+06	251658	1.38336e+06	0	129479	402333	4.81566e+06	6.5236e+06	2.11538e+06	0	955829	156033	422249	2.85339e+06	1.50873e+06	0	1.59387e+06	0	0	0	0	568982	318040	552925	0	0	407404	0	236669	659336	0	326752	6.81157e+06	0	1.23388e+06	4.20225e+06	0	262972	8.2348e+06	5.92033e+06	0	937672	567311
Q8N392	Rho GTPase-activating protein 18	ARHGAP18	2.93e-06	231232	402531	649170	0	143249	4.48576e+06	0	0	0	744860	306552	208824	0	213944	0	196726	0	214954	228174	0	0	128997	305234	0	226973	366668	243491	0	0	0	665574	204091	88561.6	0	243266	1.22014e+06	514875	2.93699e+06	335353	0	722409	633501	240568	0	259922	351252
Q8N3D4	EH domain-binding protein 1-like protein 1	EHBP1L1	4.86e-06	53933.4	169406	348247	24516.5	79605.7	0	52821.3	69713.4	373904	281711	336867	0	37864.6	303087	0	0	234817	207542	245141	446324	175122	14674.8	313135	25189.1	188753	129625	149376	286793	0	157705	351669	442164	607640	950228	175854	142315	0	105624	888206	435035	100386	12606	46704.2	0	138767	960573
Q8N3U4	Cohesin subunit SA-2	STAG2	4.04e-05	0	38427.1	165355	101489	326075	169627	308635	118240	14434.3	36301	357499	182736	474639	140692	0	68955.2	65493.2	60665.1	42564.9	155674	108050	31677.5	157500	227524	462590	88317.3	0	104927	22575.3	104252	286239	276865	0	0	130473	59010.5	417783	493257	396718	670030	2.1941e+06	313076	226470	95329.2	863235	22000.5
Q8N4T8	Carbonyl reductase family member 4	CBR4	1.81e-07	3.67943e+07	5.3648e+07	4.52416e+07	1.2112e+08	6.33789e+07	5.58735e+07	4.64252e+07	1.0159e+08	2.58784e+07	4.33158e+07	1.62213e+08	6.37379e+07	3.96894e+07	1.77588e+07	7.94771e+07	3.72841e+07	2.95849e+07	1.03049e+08	8.94553e+07	4.38315e+07	7.08457e+07	2.05785e+07	1.40303e+08	3.5292e+07	4.3656e+07	100253623	7.67173e+07	5.84281e+07	7.69142e+07	2.9584e+06	6.9206e+07	9.31857e+07	6.18915e+07	1.25166e+08	4.34024e+07	3.69473e+07	2.89959e+07	3.38559e+06	1.33581e+07	5.47469e+07	2.65078e+07	1.97192e+07	1.5402e+07	2.19798e+07	4.00873e+07	4.33333e+07
Q8N5M1	ATP synthase mitochondrial F1 complex assembly factor 2	ATPAF2	3.11e-05	4.52004e+06	1.13829e+07	4.01227e+06	8.51435e+06	8.92293e+06	8.0572e+06	8.80348e+06	1.50325e+07	1.79919e+07	1.2073e+07	1.18684e+07	6.81129e+06	1.52204e+07	5.9961e+06	1.30528e+07	1.74186e+06	6.92291e+06	6.41685e+06	8.92332e+06	1.25221e+07	950604	8.00603e+06	2.63862e+07	2.14646e+06	2.39191e+07	1.32018e+07	6.90264e+06	8.31154e+06	9.08255e+06	1.38123e+07	291297	8.0964e+06	9.16933e+06	8.05776e+06	3.9037e+06	6.20703e+06	2.92333e+07	7.01815e+06	2.68661e+06	4.27831e+06	7.06211e+06	1.35964e+07	1.37723e+06	1.43359e+07	1.49275e+07	7.77626e+06
Q8N5V2	Ephexin-1	NGEF	7.03e-05	223114	233192	309579	0	1.20357e+06	632355	193660	485605	209471	251559	0	327451	232288	1.17294e+06	324998	105561	798060	306891	584821	153463	0	128417	254063	286204	953151	664288	312335	611330	136342	136866	285443	1.04576e+06	204875	661227	371497	186374	1.28054e+06	2.36095e+06	1.87879e+06	554426	108118	554166	781717	484645	721035	4.58334e+06
Q8N7H5	RNA polymerase II-associated factor 1 homolog	PAF1	0.000211776	1.13948e+06	360258	603799	0	317153	4.1132e+06	471661	0	165991	54661	1.04558e+06	2.31023e+06	413495	1.60962e+06	0	0	0	1.13596e+06	207801	0	68619.2	122862	103342	62940.9	1.11534e+06	501364	73043.6	0	435121	367640	1.178e+06	224203	0	160698	1.25104e+06	137099	87857.1	2.73557e+06	1.69213e+06	959086	1.36572e+06	1.79677e+06	1.03445e+06	153412	1.31455e+06	553071
Q8N806	Putative E3 ubiquitin-protein ligase UBR7	UBR7	0.239873	262703	0	232044	0	724229	0	406625	0	0	0	185427	540000	201607	175774	0	0	268493	241772	0	0	128743	779719	34130.5	198910	509976	367204	0	159849	0	202865	124446	0	0	0	259059	0	130103	2.32886e+06	736190	946110	1.21103e+06	1.88367e+06	0	564316	901554	665495
Q8N8A2	Serine/threonine-protein phosphatase 6 regulatory ankyrin repeat subunit B	ANKRD44	2.09e-07	105475	784606	988857	394609	125685	365036	373159	43336.3	651395	1.16874e+06	0	84506.2	175587	546748	133996	468002	989263	121326	945493	4.74528e+06	360769	1.31231e+06	3.34061e+06	1.93447e+06	2.14399e+06	1.33243e+06	596542	1.30107e+06	86429.9	4.05929e+06	1.07578e+06	1.27561e+06	1.0784e+06	666711	1.5085e+06	849537	644493	678945	1.02379e+06	779560	357325	648031	453845	232435	550282	500511
Q8N9L9	Acyl-coenzyme A thioesterase 4	ACOT4	0.00147305	1.96772e+06	5.24645e+06	1.50789e+06	3.55351e+06	1.44859e+07	6.85581e+06	2.72044e+06	6.38195e+06	2.71026e+06	2.24106e+07	8.11032e+06	3.86215e+06	9.32131e+06	1.8871e+06	4.24825e+06	3.62903e+06	2.47345e+06	4.38567e+06	1.41302e+06	1.38265e+07	7.24159e+06	1.97658e+06	5.17062e+06	892917	7.9217e+06	386624	2.56975e+06	6.81006e+06	1.14258e+06	660446	6.66638e+06	1.18958e+07	0	1.2222e+06	1.33557e+06	754567	7.82595e+06	2.96458e+06	2.4373e+06	1.81737e+06	3.28542e+06	2.02723e+06	1.1678e+06	5.18018e+06	458081	905667
Q8NAV1	Pre-mRNA-splicing factor 38A	PRPF38A	8.32e-05	0	335471	0	318622	399073	0	975605	678821	0	436887	852942	0	948296	400713	0	440539	1.28394e+06	1.03012e+06	221549	606094	0	174679	348004	337069	400263	0	433254	0	0	1.42909e+06	2.21645e+06	0	0	802923	331446	0	638178	4.56603e+06	1.56726e+06	656308	2.956e+06	403352	3.28662e+06	0	1.14988e+06	207370
Q8NB16	Mixed lineage kinase domain-like protein	MLKL	0.00042281	0	336427	808483	114296	180873	166773	3.02696e+06	0	489308	356807	273374	664194	76183.2	353720	37059.4	26762.3	113320	30258.8	319927	756284	1.6839e+06	0	1.84213e+06	0	0	2.45032e+06	0	178912	533762	1.62943e+06	634091	0	0	212140	217079	746102	0	381845	368437	2.28428e+06	0	0	170372	0	682696	304816
Q8NBJ4	Golgi membrane protein 1	GOLM1	0.000723437	167927	309436	1.06047e+07	0	1.84933e+06	670100	0	0	36800.2	2.03415e+06	7.39425e+06	1.07898e+07	5.81616e+06	8.50026e+06	1.68565e+06	1.8599e+06	1.5243e+06	2.26893e+06	93386	3.72492e+06	1.46564e+06	914270	2.0573e+06	0	3.47067e+06	205425	525127	9.62271e+06	429598	104857	9.37542e+06	0	3.57444e+06	366231	3.02761e+06	3.9492e+06	0	9.44424e+06	3.43688e+06	1.30398e+06	0	2.14054e+07	1.36281e+07	0	864142	1.1212e+07
Q8NBX0	Saccharopine dehydrogenase-like oxidoreductase	SCCPDH	0.00032581	3.25916e+07	5.23167e+07	9.7293e+07	7.46549e+07	3.19042e+08	6.77217e+07	1.68464e+08	1.2982e+08	123103251	5.23706e+07	1.1773e+08	1.4626e+08	7.81442e+07	9.31955e+07	4.97739e+07	2.04736e+08	8.86016e+07	3.6489e+07	1.11364e+08	1.71562e+08	8.28443e+07	1.81715e+08	1.39489e+08	1.59372e+08	221737248	1.53437e+08	8.72978e+07	9.5538e+07	1.15035e+08	6.7078e+07	9.41357e+07	1.36868e+08	220606669	1.13953e+08	142743482	5.75509e+07	527488917	7.50465e+07	1.34348e+08	1.82509e+08	1.11234e+08	1.07774e+08	5.50801e+07	1.40972e+08	1.57459e+08	1.10131e+08
Q8NCG7	Sn1-specific diacylglycerol lipase beta	DAGLB	0.00028391	173273	331620	322493	54271.8	1.37135e+06	0	60609.1	123203	133288	168980	158642	118198	1.23326e+06	258669	180728	77643.2	0	150540	104514	124866	0	69815.5	0	0	224532	0	0	634700	81032.8	0	257452	115882	322661	116148	247508	205096	0	127691	125874	282390	93554.2	1.79487e+06	56622.1	779638	825066	471542
Q8ND04	Protein SMG8	SMG8	0.00228069	0	856297	0	0	0	20374.1	0	0	429282	148931	490182	215605	0	251942	0	0	0	455197	0	0	0	138851	0	0	56964.7	0	0	172695	69029.8	0	0	87829.8	65680.6	0	0	0	51655.4	939008	413944	131401	108362	101310	253831	298688	144969	54102.2
Q8NDI1	EH domain-binding protein 1	EHBP1	0.108616	79599.3	1.61885e+06	406559	237509	247484	173073	622828	224280	633820	152588	180452	454254	173992	267771	351445	239496	735044	789161	1.18119e+06	236270	2.97508e+06	2.38102e+06	244583	311211	632170	2.12183e+06	276783	530790	356192	681544	1.14889e+06	779113	190149	1.19613e+06	255414	89411.2	3.17118e+06	5.63019e+06	755645	317449	248538	966398	497276	279863	912598	1.0187e+06
Q8NE86	Calcium uniporter protein, mitochondrial	MCU	4e-05	0	0	586116	398643	229768	0	149089	0	531732	0	825694	201060	0	424972	0	0	178470	0	0	1.00845e+06	563072	0	1.36296e+06	0	1.05809e+06	818365	239153	411754	0	239809	1.8043e+06	880307	514978	781958	849363	3.20209e+06	89972.7	63830.6	1.08416e+06	4.17166e+06	481467	158565	0	1.74062e+06	114212	121417
Q8NF50	Dedicator of cytokinesis protein 8	DOCK8	7.51e-07	0	55164.7	173402	43881.8	0	33231.7	0	45351	112823	50699.7	79260.1	0	0	170895	678294	0	0	0	238282	98701.6	0	0	76109.8	354083	95481.7	59982.2	75405.1	0	0	66662.9	171529	48498.9	101072	0	92240.2	239302	0	0	90081.1	0	381107	0	0	0	478969	0
Q8NFC6	Biorientation of chromosomes in cell division protein 1-like 1	BOD1L1	0.0109837	0	25968.8	0	0	33377	126851	18235.3	0	15724.6	0	46080.3	120116	16241.9	141217	0	247196	0	16482.4	0	0	0	0	42513.6	0	69022.2	18668.4	0	0	58561.2	211826	11939.6	27606.5	0	233199	31501.9	0	20333.7	48554.5	264302	143264	188356	155080	0	102510	196308	50768.6
Q8NFH3	Nucleoporin Nup43	NUP43	4.73e-05	655267	154628	892125	0	538696	1.17596e+06	416606	333247	0	277801	1.57311e+06	3.243e+06	1.53469e+06	429930	0	0	1.88306e+06	882615	0	1.78877e+06	444402	256625	1.80296e+06	1.24624e+06	2.93687e+06	643107	2.23477e+06	772767	0	485296	5.33331e+06	323948	140460	782982	946308	0	1.54035e+06	4.07031e+06	3.7201e+06	846273	8.51622e+06	2.55591e+06	2.37553e+06	2.03098e+06	954843	1.81923e+06
Q8NHP8	Putative phospholipase B-like 2;Putative phospholipase B-like 2 32 kDa form;Putative phospholipase B-like 2 45 kDa form	PLBD2	0.105483	787069	2.28321e+06	2.08423e+06	1.01074e+06	0	0	2.9069e+06	1.32018e+06	168899	6.10687e+06	6.53103e+06	766391	1.1949e+06	6.33314e+06	923571	6.48899e+06	425737	609489	240392	1.85295e+07	1.04304e+06	0	2.33961e+06	115295	2.77501e+06	236922	523835	1.19454e+06	635828	943492	1.00047e+07	3.37689e+06	2.48432e+07	1.51886e+06	9.82406e+06	1.50097e+07	0	628605	5.65199e+06	234166	9.72371e+06	1.05812e+06	631569	639976	3.90661e+06	116629
Q8NHV1	GTPase IMAP family member 7	GIMAP7	1.66e-07	0	255719	1.07615e+06	0	567806	612247	583717	1.03008e+06	1.19608e+06	1.09924e+06	760061	512876	0	1.03386e+06	0	510672	309307	0	0	531365	0	832984	295029	0	967482	1.12974e+06	707324	0	0	2.04194e+06	1.12318e+06	1.37874e+06	1.17565e+06	1.1196e+06	0	311084	227466	2.41897e+06	1.21514e+06	0	0	0	545227	295104	3.94113e+06	0
Q8NI27	THO complex subunit 2	THOC2	7.53e-07	60057	34057.7	383328	80965.7	352937	237207	229719	0	739436	167716	566343	183783	1.28845e+06	792687	63153.1	269742	323766	782591	25300.1	1.06738e+06	844164	24269.2	1.38329e+06	569250	473573	6200.27	431449	890448	0	51887	1.07359e+06	784838	0	188402	499583	701220	790466	1.87416e+06	1.87683e+06	2.04937e+06	4.80393e+06	203266	1.99156e+06	393140	771853	2.88231e+06
Q8NI36	WD repeat-containing protein 36	WDR36	0.0235754	0	0	110056	46217.2	0	458080	0	0	0	57095.6	39686.3	106171	64771.7	94167.8	0	0	203447	0	0	196220	0	0	120480	0	0	75400.9	201208	70622.1	0	0	757713	126743	0	0	0	0	0	112951	277010	0	261430	38005.7	194556	0	167658	43020.2
Q8NI60	Atypical kinase ADCK3, mitochondrial	ADCK3	0.000155377	4.25091e+06	1.5939e+07	1.74461e+07	1.11664e+07	2.95601e+07	4.87477e+07	1.08969e+07	1.50769e+07	1.04643e+07	2.91884e+06	7.96445e+06	2.64686e+07	2.32559e+07	1.16397e+07	6.81943e+06	1.09927e+07	1.52926e+07	1.05997e+07	9.93782e+06	1.16539e+07	1.01752e+07	1.09531e+07	2.4709e+07	1.4301e+07	4.64373e+07	1.30378e+07	6.52026e+06	9.41447e+06	1.94296e+07	8.4459e+06	1.60364e+07	5.95845e+06	2.93575e+07	9.17966e+06	6.59098e+06	7.60863e+06	9.28807e+06	5.27854e+06	7.69289e+06	3.73274e+07	2.58349e+07	6.9368e+06	1.44765e+07	3.57317e+07	1.48298e+07	1.17311e+07
Q8TAG9	Exocyst complex component 6	EXOC6	0.0702759	0	466809	406034	0	0	205864	312044	293522	866207	0	563675	561291	359140	157763	0	33463.1	154993	207205	0	585525	0	295475	508003	0	430779	504007	182647	152704	0	47126	252644	285015	225810	0	259435	169695	94441.4	617744	908979	1.18554e+06	1.52439e+06	1.37482e+06	415065	302480	351120	527560
Q8TAQ2	SWI/SNF complex subunit SMARCC2	SMARCC2	8.04e-11	996283	870671	859643	903196	927955	882314	1.55131e+06	1.0193e+06	1.56399e+06	575302	1.44923e+06	1.34071e+06	1.34495e+06	3.48199e+06	566459	2.9161e+06	1.35273e+06	1.53444e+06	496650	1.90878e+06	1.42263e+06	1.19607e+06	761193	1.2224e+06	1.59333e+06	1.55507e+06	1.89801e+06	545089	378278	843999	3.60275e+06	1.85599e+06	312466	1.81145e+06	2.40951e+06	866417	3.24177e+06	5.69121e+06	4.62807e+06	5.55828e+06	9.01875e+06	4.34695e+06	2.58225e+06	1.98913e+06	6.09926e+06	3.41966e+06
Q8TB03	Uncharacterized protein CXorf38	CXorf38	0.00206209	229510	119932	161294	366524	77994.5	0	0	404887	136390	482224	2.76936e+06	398890	0	620096	0	218582	685515	498870	668764	468924	0	231848	535689	0	272848	1.23383e+06	721763	407124	0	524863	853513	1.61774e+06	909565	0	1.70726e+06	1.41848e+06	0	654788	1.18693e+06	0	0	208388	0	0	2.69507e+06	2.24437e+06
Q8TB24	Ras and Rab interactor 3	RIN3	7.63e-07	0	281765	0	117302	0	0	0	0	219060	224740	246171	0	0	206610	0	0	0	0	0	0	0	0	0	0	0	0	447712	0	0	0	182308	0	0	131900	277836	0	98546	0	213740	0	0	76685.9	0	234428	81082.4	0
Q8TB37	Iron-sulfur protein NUBPL	NUBPL	0.000458749	1.34998e+06	2.82024e+06	7.20281e+06	3.6087e+06	2.75107e+06	1.28403e+06	4.75077e+06	2.8316e+06	744300	780007	1.5393e+06	789780	1.45805e+07	618643	940762	0	2.0039e+06	3.04837e+06	2.01258e+06	3.35547e+06	1.55446e+06	1.25235e+06	1.00263e+07	1.1689e+07	2.83909e+06	4.87562e+06	3.92953e+06	2.9174e+06	1.08808e+07	4.72797e+06	2.96667e+06	2.50275e+06	1.67509e+06	1.26347e+07	0	2.17006e+06	8.30963e+06	1.12861e+06	0	1.70645e+06	3.45785e+06	0	1.64601e+06	5.81015e+06	2.42779e+06	3.06015e+06
Q8TCU6	Phosphatidylinositol 3,4,5-trisphosphate-dependent Rac exchanger 1 protein	PREX1	0.165974	0	0	19533.6	0	0	66537.3	0	0	0	35743.3	197063	0	0	48435.1	0	0	29306.1	0	20380.7	115252	0	0	0	0	67035.5	6.77059e+06	0	0	0	44217.2	62117.5	1.85375e+06	0	0	266761	107866	0	157230	0	16814.9	633348	13507.6	185074	0	0	0
Q8TD30	Alanine aminotransferase 2	GPT2	0.641669	0	243232	1.67304e+06	3.15004e+06	457022	3.02136e+06	2.00653e+07	992057	0	3.42267e+06	1.84575e+06	3.33918e+06	1.82484e+06	243971	5.73836e+06	3.3301e+06	737619	2.96982e+06	373975	153785	0	853495	1.3787e+06	1.8239e+06	5.84102e+06	1.27808e+07	133724	450489	2.34423e+06	599486	3.1391e+06	0	0	848464	1.65078e+06	7.68532e+06	0	689996	0	2.116e+06	0	0	133318	265881	1.62442e+07	256204
Q8TD55	Pleckstrin homology domain-containing family O member 2	PLEKHO2	2.41e-11	364566	3.91099e+06	1.89707e+06	4.48491e+06	855738	1.8896e+06	1.41894e+06	1.44706e+06	2.58884e+06	2.72689e+06	5.97955e+06	408642	643402	5.2306e+06	0	4.16159e+06	2.32887e+06	2.13213e+06	1.8655e+06	1.4065e+06	458581	286345	453100	1.30156e+06	4.29296e+06	995732	2.08141e+06	1.10611e+06	214141	4.19506e+06	7.71233e+06	3.67769e+06	3.80533e+06	1.16063e+06	5.02953e+06	880433	231391	2.48869e+06	2.89598e+06	1.32309e+06	0	128925	1.07903e+06	372727	3.26644e+06	0
Q8TDP1	Ribonuclease H2 subunit C	RNASEH2C	7.69e-05	0	0	0	0	0	0	0	0	0	0	657589	0	0	0	0	0	0	0	0	0	0	0	0	0	0	0	0	0	0	0	0	0	0	351891	225260	0	0	822456	3.00769e+06	0	0	382659	0	0	0	0
Q8TDQ7	Glucosamine-6-phosphate isomerase 2	GNPDA2	1.18e-06	0	282624	81534.2	638860	0	208224	613296	0	731174	0	0	0	0	1.13224e+06	0	530441	0	0	180361	0	0	0	0	0	97257.7	262888	0	194960	0	339847	758566	281514	0	0	337035	353818	0	154530	1.00619e+06	0	0	723920	0	0	0	0
Q8TDX5	2-amino-3-carboxymuconate-6-semialdehyde decarboxylase	ACMSD	0.0419212	118952	9.57334e+06	1.28172e+06	3.39433e+06	7.88639e+06	0	1.1625e+07	84556.5	825711	6.36671e+06	185749	2.01584e+06	2.94628e+06	0	15927593	6.75354e+06	2.86368e+07	515208	6.31237e+06	1.91305e+06	1.08222e+06	887870	698298	5.83944e+06	187823	7.68899e+06	3.2878e+06	433234	6.71889e+06	1.03305e+06	1.29253e+07	1.56489e+06	0	2.90226e+06	270760	2.25528e+06	4.58716e+06	576514	0	8.74978e+06	284985	1.25991e+06	0	0	1.1624e+07	0
Q8TDZ2	Protein-methionine sulfoxide oxidase MICAL1	MICAL1	2.14e-07	0	178622	86999.9	327586	0	0	204208	892990	1.04445e+06	0	673089	0	1.50839e+06	0	0	0	60794.4	290303	0	256044	57747.8	1.56113e+06	1.32858e+06	1.4635e+06	0	81135.2	1.96371e+06	0	0	102796	1.59387e+06	1.05398e+06	801453	0	1.3291e+06	693924	0	705495	99960.3	126333	0	1.03027e+06	0	0	3.74129e+06	238732
Q8TEB1	DDB1- and CUL4-associated factor 11	DCAF11	0.414152	1.03705e+06	1.99241e+07	2.04437e+06	6.05648e+06	6.95931e+06	4.10336e+06	1.99438e+07	3.03745e+06	9.2384e+06	170958	3.48435e+06	2.2537e+06	1.99057e+07	2.51135e+06	4.06042e+06	6.71786e+06	1.20458e+07	3.4179e+06	7.58344e+06	2.09621e+06	5.53696e+06	1.26238e+07	1.44015e+06	8.48645e+06	5.11225e+06	4.41451e+06	2.08386e+06	1.56063e+06	5.74451e+06	2.526e+07	1.6902e+06	2.36878e+06	399381	6.85957e+06	2.64359e+06	1.61159e+08	8.24365e+06	7.52469e+06	2.74872e+06	1.79149e+06	4.44199e+06	2.70518e+06	4.63172e+06	2.14778e+06	7.52947e+06	1.43948e+06
Q8TEM1	Nuclear pore membrane glycoprotein 210	NUP210	0.00402772	0	11971	426210	504202	5.77615e+06	1.50207e+06	780525	145951	2.13228e+06	257325	956974	2.0987e+06	1.18372e+06	996407	0	688514	957431	910295	41401.7	2.53799e+06	2.50996e+06	147000	1.71365e+06	699920	2.82402e+06	236016	1.849e+06	79376.5	0	0	2.39345e+06	1.05161e+06	0	783985	211823	340995	2.26935e+06	3.70591e+06	4.85432e+06	8.40817e+06	2.7619e+06	1.34237e+06	1.4782e+06	2.06833e+06	1.81621e+06	465534
Q8TEQ6	Gem-associated protein 5	GEMIN5	0.000270059	550883	136326	466861	166364	337101	2.57107e+06	262166	286539	5192.69	710807	713723	2.6192e+06	366461	2.08508e+06	736720	729525	903536	312552	324247	479982	71016.1	517279	1.20308e+06	467489	1.38892e+06	2.61235e+06	395684	745638	274318	63856.3	1.4383e+06	603712	0	175753	477539	117200	1.28919e+06	985470	1.53866e+06	909129	1.09296e+06	957246	332292	1.13627e+06	330253	1.10548e+06
Q8TEQ8	GPI ethanolamine phosphate transferase 3	PIGO	0.471728	147669	0	80772.4	0	3.81213e+07	204556	0	41361.6	101242	41558.1	0	391260	564851	0	77004.6	140020	0	204129	98608.5	416116	0	0	470138	48475	80803.6	377198	175483	76211.5	83901.6	0	179615	543831	49597	104848	0	59801.5	2.95357e+06	257086	143273	3.04017e+07	1.76767e+06	0	59428.7	481019	998829	277813
Q8TF05	Serine/threonine-protein phosphatase 4 regulatory subunit 1	PPP4R1	1.76e-06	131900	141151	528648	115788	527531	0	202075	395069	195317	256929	709686	256248	1.08784e+06	212639	151706	1.10909e+06	259840	612089	201848	265148	188178	463421	883275	236958	312870	451648	1.07718e+06	453608	305029	410944	702164	380820	77355.5	111274	227099	568972	1.0201e+06	1.07861e+06	678956	1.62057e+06	303563	799966	238488	218242	1.4065e+06	2.14565e+06
Q8WU39	Marginal zone B- and B1-cell-specific protein	MZB1	0.000759674	0	0	2.1917e+07	8.78551e+06	0	0	0	2.04192e+06	2.95407e+07	0	363028	0	0	4.08831e+06	0	0	0	509625	1.25294e+07	0	4.10908e+06	0	0	0	3.70344e+06	0	1.36553e+06	0	516112	6.35123e+06	1.47626e+07	2.25307e+06	0	552758	4.02131e+06	516139	0	0	3.00558e+07	0	0	0	0	0	1.86311e+07	0
Q8WUA2	Peptidyl-prolyl cis-trans isomerase-like 4	PPIL4	0.029523	0	602753	729337	305106	714758	0	1.07973e+06	104130	564703	0	608803	1.14639e+06	2.22146e+06	1.07671e+06	0	0	455430	232947	0	101781	783099	585236	1.03464e+06	332798	0	0	737105	0	321491	75825.6	1.12812e+06	420540	104064	943273	861424	152490	736815	1.71739e+06	600422	3.56045e+06	426317	1.19077e+06	1.43532e+06	1.64664e+06	1.28155e+06	1.52194e+06
Q8WUA4	General transcription factor 3C polypeptide 2	GTF3C2	0.000789028	0	0	0	0	216648	0	0	0	154455	0	138564	99177	80275.2	0	0	0	0	0	0	0	432198	81206.2	84484.8	0	181175	0	0	0	0	0	0	0	0	0	93032.5	0	813365	991958	0	120323	47149.1	0	90128.7	0	173906	116070
Q8WUH2	Transforming growth factor-beta receptor-associated protein 1	TGFBRAP1	3.52e-09	0	0	0	0	0	0	0	59151.8	0	0	51667.9	0	0	0	0	0	179438	0	0	0	0	0	0	0	334299	0	0	0	0	0	15666.6	184354	0	24450.9	141772	0	0	167261	0	0	0	0	72820.3	143956	118065	30326.1
Q8WUP2	Filamin-binding LIM protein 1	FBLIM1	9.07e-07	0	2.72031e+06	3.24901e+06	1.71522e+06	610676	153920	2.29948e+06	0	3.76937e+06	1.15571e+06	2.05985e+06	0	272285	4.42814e+06	0	941796	0	2.06996e+06	2.12185e+06	0	0	965974	0	0	5.63531e+06	2.5684e+06	1.19955e+06	2.46157e+06	537750	4.57045e+06	6.19732e+06	560604	2.06252e+06	3.75462e+06	3.79253e+06	1.53951e+06	0	1.7557e+06	158932	148518	1.9941e+06	460931	279206	0	203465	887365
Q8WV74	Nucleoside diphosphate-linked moiety X motif 8, mitochondrial	NUDT8	0.0727651	907695	2.8141e+06	1.05033e+06	1.23109e+06	9.84224e+06	1.01689e+06	0	334245	1.40005e+06	316318	409785	0	110117	1.98167e+06	926058	1.28312e+06	689725	3.92315e+06	1.5193e+06	886263	4.15485e+06	811240	1.90503e+06	1.75792e+06	0	5.4132e+06	0	3.88727e+06	1.06309e+06	0	2.17678e+06	2.41693e+06	2.33607e+06	1.19461e+07	0	5.16785e+06	3.93495e+06	0	1.9549e+06	252451	365599	1.08984e+06	0	4.04742e+06	468501	325676
[truncated: 376 more rows]
[truncated: 55 more columns]

## Sheet: Sheet2
ID	Protein.names	Symbol	FDR	Ratio	specific subtype	Mean-S1	Mean-S2	Mean-S3
[truncated: 472 more rows]

## Sheet: Sheet3
Gene.ID	GeneSymbol	FDR	specific subtype	E12.5	E13.5	E14.5	E15.5	E16.5	E17.5	E18.5	D1	D3	D5	W1	W2	W3	W6	W8
[truncated: 345 more rows]

[truncated: 1 more sheets: ReadMe]
